# Supplementary material
Source: publisher figshare collection journal article supplement (https://acs.figshare.com/ndownloader/files/16775912)

# checkCIF/PLATON report

You have not supplied any structure factors. As a result the full set of tests cannot be run.

THIS REPORT IS FOR GUIDANCE ONLY. IF USED AS PART OF A REVIEW PROCEDURE FOR PUBLICATION, IT SHOULD NOT REPLACE THE EXPERTISE OF AN EXPERIENCED CRYSTALLOGRAPHIC REFEREE.

No syntax errors found.      CIF dictionary      Interpreting this report

## Datablock: LIFM-114-40C

---

|                        |                                                   |                                 |
|------------------------|---------------------------------------------------|---------------------------------|
| Bond precision:        | C-C = 0.0123 Å                                    | Wavelength=1.54178              |
| Cell:                  | a=25.7916(15)                                     | b=41.7841(11)      c=16.8545(4) |
|                        | alpha=90                                          | beta=90      gamma=90           |
| Temperature:           | 150 K                                             |                                 |
|                        | Calculated                                        | Reported                        |
| Volume                 | 18163.7(12)                                       | 18163.7(12)                     |
| Space group            | C m m m                                           | C m m m                         |
| Hall group             | -C 2 2                                            | -C 2 2                          |
| Moiety formula         | 2(C27 H16 O8 Zr1.50), C54 H32 O16 Zr3 [+ solvent] | 0.5(C216 H128 O64 Zr12)         |
| Sum formula            | C108 H64 O32 Zr6 [+ solvent]                      | C108 H64 O32 Zr6                |
| Mr                     | 2420.91                                           | 2420.91                         |
| Dx, g cm <sup>-3</sup> | 0.885                                             | 0.885                           |
| Z                      | 4                                                 | 4                               |
| Mu (mm <sup>-1</sup> ) | 3.111                                             | 3.111                           |
| F000                   | 4832.0                                            | 4832.0                          |
| F000'                  | 4840.85                                           |                                 |
| h,k,lmax               | 30,49,19                                          | 30,48,19                        |
| Nref                   | 8459                                              | 8272                            |
| Tmin,Tmax              | 0.861,0.940                                       | 0.309,1.000                     |
| Tmin'                  | 0.393                                             |                                 |

Correction method= # Reported T Limits: Tmin=0.309 Tmax=1.000  
AbsCorr = MULTI-SCAN

Data completeness= 0.978      Theta(max)= 65.589

R(reflections)= 0.1139( 6980)      wR2(reflections)= 0.3333( 8272)

S = 1.078      Npar= 543

---

The following ALERTS were generated. Each ALERT has the format

**test-name\_ALERT\_alert-type\_alert-level.**

Click on the hyperlinks for more details of the test.

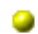

### Alert level C

|                   |                                                    |             |
|-------------------|----------------------------------------------------|-------------|
| DIFMN02_ALERT_2_C | The minimum difference density is < -0.1*ZMAX*0.75 |             |
|                   | _refine_diff_density_min given =                   | -3.942      |
|                   | Test value =                                       | -3.000      |
| DIFMN03_ALERT_1_C | The minimum difference density is < -0.1*ZMAX*0.75 |             |
|                   | The relevant atom site should be identified.       |             |
| PLAT029_ALERT_3_C | _diffrn_measured_fraction_theta_full value Low .   | 0.978 Why?  |
| PLAT082_ALERT_2_C | High R1 Value .....                                | 0.11 Report |
| PLAT084_ALERT_3_C | High wR2 Value (i.e. > 0.25) .....                 | 0.33 Report |
| PLAT098_ALERT_2_C | Large Reported Min. (Negative) Residual Density    | -3.94 eA-3  |
| PLAT213_ALERT_2_C | Atom O10 has ADP max/min Ratio .....               | 3.2 prolat  |
| PLAT213_ALERT_2_C | Atom O11 has ADP max/min Ratio .....               | 3.5 prolat  |
| PLAT213_ALERT_2_C | Atom C1 has ADP max/min Ratio .....                | 3.2 prolat  |
| PLAT213_ALERT_2_C | Atom C14 has ADP max/min Ratio .....               | 3.2 prolat  |
| PLAT241_ALERT_2_C | High 'MainMol' Ueq as Compared to Neighbors of     | 02 Check    |
| PLAT241_ALERT_2_C | High 'MainMol' Ueq as Compared to Neighbors of     | 010 Check   |
| PLAT241_ALERT_2_C | High 'MainMol' Ueq as Compared to Neighbors of     | 011 Check   |
| PLAT241_ALERT_2_C | High 'MainMol' Ueq as Compared to Neighbors of     | 05 Check    |
| PLAT242_ALERT_2_C | Low 'MainMol' Ueq as Compared to Neighbors of      | Zr1 Check   |
| PLAT242_ALERT_2_C | Low 'MainMol' Ueq as Compared to Neighbors of      | Zr2 Check   |
| PLAT250_ALERT_2_C | Large U3/U1 Ratio for Average U(i,j) Tensor ....   | 4.0 Note    |
| PLAT250_ALERT_2_C | Large U3/U1 Ratio for Average U(i,j) Tensor ....   | 2.2 Note    |
| PLAT334_ALERT_2_C | Small Aver. Benzene C-C Dist C2 -C7                | 1.36 Ang.   |
| PLAT342_ALERT_3_C | Low Bond Precision on C-C Bonds .....              | 0.0123 Ang. |
| PLAT410_ALERT_2_C | Short Intra H...H Contact H4 ..H9A                 | 1.99 Ang.   |
| PLAT410_ALERT_2_C | Short Intra H...H Contact H6 ..H13A                | 1.97 Ang.   |

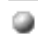

### Alert level G

|                   |                                                  |              |
|-------------------|--------------------------------------------------|--------------|
| PLAT002_ALERT_2_G | Number of Distance or Angle Restraints on AtSite | 42 Note      |
| PLAT003_ALERT_2_G | Number of Uiso or Uij Restrained non-H Atoms ... | 49 Report    |
| PLAT004_ALERT_5_G | Polymeric Structure Found with Maximum Dimension | 3 Info       |
| PLAT012_ALERT_1_G | No _shelx_res_checksum Found in CIF .....        | Please Check |
| PLAT014_ALERT_1_G | No _shelx_fab_checksum Found in CIF .....        | Please Check |
| PLAT042_ALERT_1_G | Calc. and Reported MoietyFormula Strings Differ  | Please Check |
| PLAT072_ALERT_2_G | SHELXL First Parameter in WGHT Unusually Large   | 0.20 Report  |
| PLAT083_ALERT_2_G | SHELXL Second Parameter in WGHT Unusually Large  | 200.00 Why ? |
| PLAT300_ALERT_4_G | Atom Site Occupancy of C9 Constrained at         | 0.5 Check    |
| PLAT300_ALERT_4_G | Atom Site Occupancy of C9A Constrained at        | 0.5 Check    |
| PLAT300_ALERT_4_G | Atom Site Occupancy of C10 Constrained at        | 0.5 Check    |
| PLAT300_ALERT_4_G | Atom Site Occupancy of C10A Constrained at       | 0.5 Check    |
| PLAT300_ALERT_4_G | Atom Site Occupancy of C12 Constrained at        | 0.5 Check    |
| PLAT300_ALERT_4_G | Atom Site Occupancy of C12A Constrained at       | 0.5 Check    |
| PLAT300_ALERT_4_G | Atom Site Occupancy of C13 Constrained at        | 0.5 Check    |
| PLAT300_ALERT_4_G | Atom Site Occupancy of C13A Constrained at       | 0.5 Check    |
| PLAT300_ALERT_4_G | Atom Site Occupancy of H9 Constrained at         | 0.5 Check    |
| PLAT300_ALERT_4_G | Atom Site Occupancy of H9A Constrained at        | 0.5 Check    |
| PLAT300_ALERT_4_G | Atom Site Occupancy of H10 Constrained at        | 0.5 Check    |
| PLAT300_ALERT_4_G | Atom Site Occupancy of H10A Constrained at       | 0.5 Check    |
| PLAT300_ALERT_4_G | Atom Site Occupancy of H12 Constrained at        | 0.5 Check    |
| PLAT300_ALERT_4_G | Atom Site Occupancy of H12A Constrained at       | 0.5 Check    |
| PLAT300_ALERT_4_G | Atom Site Occupancy of H13 Constrained at        | 0.5 Check    |
| PLAT300_ALERT_4_G | Atom Site Occupancy of H13A Constrained at       | 0.5 Check    |
| PLAT300_ALERT_4_G | Atom Site Occupancy of Zr3 Constrained at        | 0.5 Check    |
| PLAT300_ALERT_4_G | Atom Site Occupancy of Zr4 Constrained at        | 0.5 Check    |
| PLAT300_ALERT_4_G | Atom Site Occupancy of Zr5 Constrained at        | 0.5 Check    |

|                   |                                                    |                   |                |       |        |
|-------------------|----------------------------------------------------|-------------------|----------------|-------|--------|
| PLAT300_ALERT_4_G | Atom Site Occupancy of                             | O3                | Constrained at | 0.5   | Check  |
| PLAT300_ALERT_4_G | Atom Site Occupancy of                             | O4                | Constrained at | 0.5   | Check  |
| PLAT300_ALERT_4_G | Atom Site Occupancy of                             | O6                | Constrained at | 0.5   | Check  |
| PLAT300_ALERT_4_G | Atom Site Occupancy of                             | O7                | Constrained at | 0.5   | Check  |
| PLAT300_ALERT_4_G | Atom Site Occupancy of                             | O12               | Constrained at | 0.5   | Check  |
| PLAT300_ALERT_4_G | Atom Site Occupancy of                             | O14               | Constrained at | 0.5   | Check  |
| PLAT300_ALERT_4_G | Atom Site Occupancy of                             | O15               | Constrained at | 0.5   | Check  |
| PLAT300_ALERT_4_G | Atom Site Occupancy of                             | O16               | Constrained at | 0.5   | Check  |
| PLAT300_ALERT_4_G | Atom Site Occupancy of                             | O17               | Constrained at | 0.5   | Check  |
| PLAT300_ALERT_4_G | Atom Site Occupancy of                             | C15               | Constrained at | 0.5   | Check  |
| PLAT300_ALERT_4_G | Atom Site Occupancy of                             | C16               | Constrained at | 0.5   | Check  |
| PLAT300_ALERT_4_G | Atom Site Occupancy of                             | C17               | Constrained at | 0.5   | Check  |
| PLAT300_ALERT_4_G | Atom Site Occupancy of                             | C18               | Constrained at | 0.5   | Check  |
| PLAT300_ALERT_4_G | Atom Site Occupancy of                             | C19               | Constrained at | 0.5   | Check  |
| PLAT300_ALERT_4_G | Atom Site Occupancy of                             | C20               | Constrained at | 0.5   | Check  |
| PLAT300_ALERT_4_G | Atom Site Occupancy of                             | C21               | Constrained at | 0.5   | Check  |
| PLAT300_ALERT_4_G | Atom Site Occupancy of                             | C22               | Constrained at | 0.5   | Check  |
| PLAT300_ALERT_4_G | Atom Site Occupancy of                             | C23               | Constrained at | 0.5   | Check  |
| PLAT300_ALERT_4_G | Atom Site Occupancy of                             | C24               | Constrained at | 0.5   | Check  |
| PLAT300_ALERT_4_G | Atom Site Occupancy of                             | C25               | Constrained at | 0.5   | Check  |
| PLAT300_ALERT_4_G | Atom Site Occupancy of                             | C27               | Constrained at | 0.5   | Check  |
| PLAT300_ALERT_4_G | Atom Site Occupancy of                             | C28               | Constrained at | 0.5   | Check  |
| PLAT300_ALERT_4_G | Atom Site Occupancy of                             | C29               | Constrained at | 0.5   | Check  |
| PLAT300_ALERT_4_G | Atom Site Occupancy of                             | C30               | Constrained at | 0.5   | Check  |
| PLAT300_ALERT_4_G | Atom Site Occupancy of                             | C31               | Constrained at | 0.5   | Check  |
| PLAT300_ALERT_4_G | Atom Site Occupancy of                             | C32               | Constrained at | 0.5   | Check  |
| PLAT300_ALERT_4_G | Atom Site Occupancy of                             | C33               | Constrained at | 0.5   | Check  |
| PLAT300_ALERT_4_G | Atom Site Occupancy of                             | C34               | Constrained at | 0.5   | Check  |
| PLAT300_ALERT_4_G | Atom Site Occupancy of                             | C35               | Constrained at | 0.5   | Check  |
| PLAT300_ALERT_4_G | Atom Site Occupancy of                             | C36               | Constrained at | 0.5   | Check  |
| PLAT300_ALERT_4_G | Atom Site Occupancy of                             | C37               | Constrained at | 0.5   | Check  |
| PLAT300_ALERT_4_G | Atom Site Occupancy of                             | C38               | Constrained at | 0.5   | Check  |
| PLAT300_ALERT_4_G | Atom Site Occupancy of                             | C39               | Constrained at | 0.5   | Check  |
| PLAT300_ALERT_4_G | Atom Site Occupancy of                             | C40               | Constrained at | 0.5   | Check  |
| PLAT300_ALERT_4_G | Atom Site Occupancy of                             | C41               | Constrained at | 0.5   | Check  |
| PLAT300_ALERT_4_G | Atom Site Occupancy of                             | H17               | Constrained at | 0.5   | Check  |
| PLAT300_ALERT_4_G | Atom Site Occupancy of                             | H18               | Constrained at | 0.5   | Check  |
| PLAT300_ALERT_4_G | Atom Site Occupancy of                             | H20               | Constrained at | 0.5   | Check  |
| PLAT300_ALERT_4_G | Atom Site Occupancy of                             | H21               | Constrained at | 0.5   | Check  |
| PLAT300_ALERT_4_G | Atom Site Occupancy of                             | H23               | Constrained at | 0.5   | Check  |
| PLAT300_ALERT_4_G | Atom Site Occupancy of                             | H24               | Constrained at | 0.5   | Check  |
| PLAT300_ALERT_4_G | Atom Site Occupancy of                             | H26               | Constrained at | 0.5   | Check  |
| PLAT300_ALERT_4_G | Atom Site Occupancy of                             | H27               | Constrained at | 0.5   | Check  |
| PLAT300_ALERT_4_G | Atom Site Occupancy of                             | H30               | Constrained at | 0.5   | Check  |
| PLAT300_ALERT_4_G | Atom Site Occupancy of                             | H31               | Constrained at | 0.5   | Check  |
| PLAT300_ALERT_4_G | Atom Site Occupancy of                             | H33               | Constrained at | 0.5   | Check  |
| PLAT300_ALERT_4_G | Atom Site Occupancy of                             | H34               | Constrained at | 0.5   | Check  |
| PLAT300_ALERT_4_G | Atom Site Occupancy of                             | H36               | Constrained at | 0.5   | Check  |
| PLAT300_ALERT_4_G | Atom Site Occupancy of                             | H37               | Constrained at | 0.5   | Check  |
| PLAT300_ALERT_4_G | Atom Site Occupancy of                             | H39               | Constrained at | 0.5   | Check  |
| PLAT300_ALERT_4_G | Atom Site Occupancy of                             | H40               | Constrained at | 0.5   | Check  |
| PLAT301_ALERT_3_G | Main Residue Disorder .....                        | (Resd 1 )         |                | 20%   | Note   |
| PLAT301_ALERT_3_G | Main Residue Disorder .....                        | (Resd 2 )         |                | 94%   | Note   |
| PLAT395_ALERT_2_G | Deviating X-O-Y Angle From 120 for                 | O6                |                | 108.8 | Degree |
| PLAT606_ALERT_4_G | VERY LARGE Solvent Accessible VOID(S) in Structure |                   |                | !     | Info   |
| PLAT764_ALERT_4_G | Overcomplete CIF Bond List Detected (Rep/Expd) .   |                   |                | 1.47  | Ratio  |
| PLAT773_ALERT_2_G | Check long C-C Bond in CIF: C25                    | --C27             |                | 1.84  | Ang.   |
| PLAT773_ALERT_2_G | Check long C-C Bond in CIF: C26                    | --C41             |                | 2.01  | Ang.   |
| PLAT773_ALERT_2_G | Check long C-C Bond in CIF: C26                    | --C41             |                | 2.01  | Ang.   |
| PLAT773_ALERT_2_G | Check long C-C Bond in CIF: C27                    | --C25             |                | 1.84  | Ang.   |
| PLAT779_ALERT_4_G | Suspect or Irrelevant (Bond) Angle in CIF .... #   |                   |                | 358   | Check  |
|                   | ZR5 -O16 -ZR5                                      | 9.656 1.555 1.555 |                | 40.80 | Deg.   |

|                   |                                                  |       |        |
|-------------------|--------------------------------------------------|-------|--------|
| PLAT779_ALERT_4_G | Suspect or Irrelevant (Bond) Angle in CIF .... # | 371   | Check  |
| ZR5               | -O17 -ZR5 9.656 1.555 1.555                      | 35.20 | Deg.   |
| PLAT779_ALERT_4_G | Suspect or Irrelevant (Bond) Angle in CIF .... # | 473   | Check  |
| C25               | -C41 -C26 6.000 1.555 1.555                      | 43.00 | Deg.   |
| PLAT794_ALERT_5_G | Tentative Bond Valency for Zr1 (IV) .            | 4.17  | Info   |
| PLAT794_ALERT_5_G | Tentative Bond Valency for Zr2 (IV) .            | 4.13  | Info   |
| PLAT811_ALERT_5_G | No ADDSYM Analysis: Too Many Excluded Atoms .... |       | ! Info |
| PLAT860_ALERT_3_G | Number of Least-Squares Restraints .....         | 728   | Note   |
| PLAT869_ALERT_4_G | ALERTS Related to the Use of SQUEEZE Suppressed  |       | ! Info |

---

0 **ALERT level A** = Most likely a serious problem - resolve or explain  
0 **ALERT level B** = A potentially serious problem, consider carefully  
22 **ALERT level C** = Check. Ensure it is not caused by an omission or oversight  
95 **ALERT level G** = General information/check it is not something unexpected

4 ALERT type 1 CIF construction/syntax error, inconsistent or missing data  
27 ALERT type 2 Indicator that the structure model may be wrong or deficient  
6 ALERT type 3 Indicator that the structure quality may be low  
76 ALERT type 4 Improvement, methodology, query or suggestion  
4 ALERT type 5 Informative message, check

---

It is advisable to attempt to resolve as many as possible of the alerts in all categories. Often the minor alerts point to easily fixed oversights, errors and omissions in your CIF or refinement strategy, so attention to these fine details can be worthwhile. In order to resolve some of the more serious problems it may be necessary to carry out additional measurements or structure refinements. However, the purpose of your study may justify the reported deviations and the more serious of these should normally be commented upon in the discussion or experimental section of a paper or in the "special\_details" fields of the CIF. checkCIF was carefully designed to identify outliers and unusual parameters, but every test has its limitations and alerts that are not important in a particular case may appear. Conversely, the absence of alerts does not guarantee there are no aspects of the results needing attention. It is up to the individual to critically assess their own results and, if necessary, seek expert advice.

### Publication of your CIF in IUCr journals

A basic structural check has been run on your CIF. These basic checks will be run on all CIFs submitted for publication in IUCr journals (*Acta Crystallographica*, *Journal of Applied Crystallography*, *Journal of Synchrotron Radiation*); however, if you intend to submit to *Acta Crystallographica Section C* or *E* or *IUCrData*, you should make sure that full publication checks are run on the final version of your CIF prior to submission.

### Publication of your CIF in other journals

Please refer to the *Notes for Authors* of the relevant journal for any special instructions relating to CIF submission.

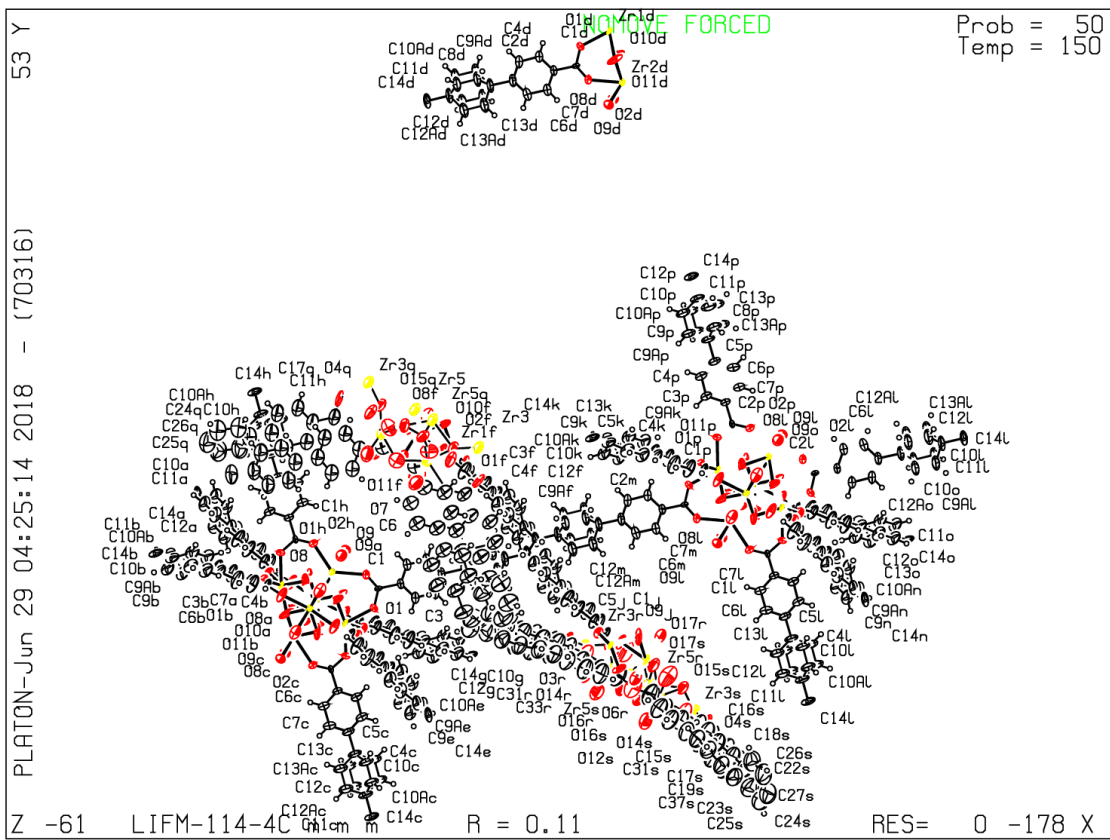

Supplement: Supplementary file 1 [file 16775912 › LIFM-114-40C-checkcif.pdf]
