# Supplementary material
Source: publisher figshare collection journal article supplement (https://acs.figshare.com/ndownloader/files/16775912)

# checkCIF/PLATON report

You have not supplied any structure factors. As a result the full set of tests cannot be run.

THIS REPORT IS FOR GUIDANCE ONLY. IF USED AS PART OF A REVIEW PROCEDURE FOR PUBLICATION, IT SHOULD NOT REPLACE THE EXPERTISE OF AN EXPERIENCED CRYSTALLOGRAPHIC REFEREE.

No syntax errors found.      CIF dictionary      Interpreting this report

## Datablock: LIFM-114-60C

---

|                 |                                |                               |
|-----------------|--------------------------------|-------------------------------|
| Bond precision: | C-C = 0.0087 A                 | Wavelength=1.54178            |
| Cell:           | a=21.8356(8)                   | b=42.279(2)      c=17.9114(3) |
|                 | alpha=90                       | beta=90      gamma=90         |
| Temperature:    | 150 K                          |                               |
|                 | Calculated                     | Reported                      |
| Volume          | 16535.6(10)                    | 16535.4(11)                   |
| Space group     | C m m a                        | C m m e                       |
| Hall group      | -C 2b 2                        | -C 2b 2                       |
| Moiety formula  | C54 H32 O16 Zr3 [+<br>solvent] | 0.5(C216 H128 O64 Zr12)       |
| Sum formula     | C54 H32 O16 Zr3 [+<br>solvent] | C108 H64 O32 Zr6              |
| Mr              | 1210.46                        | 2420.91                       |
| Dx, g cm-3      | 0.973                          | 0.972                         |
| Z               | 8                              | 4                             |
| Mu (mm-1)       | 3.418                          | 3.418                         |
| F000            | 4832.0                         | 4832.0                        |
| F000'           | 4840.85                        |                               |
| h,k,lmax        | 25,49,21                       | 25,48,21                      |
| Nref            | 7452                           | 7286                          |
| Tmin,Tmax       | 0.697,0.710                    | 0.573,1.000                   |
| Tmin'           | 0.342                          |                               |

Correction method= # Reported T Limits: Tmin=0.573 Tmax=1.000  
AbsCorr = MULTI-SCAN

Data completeness= 0.978      Theta(max)= 65.558

R(reflections)= 0.0541( 6303)      wR2(reflections)= 0.1767( 7286)

S = 1.115      Npar= 344

---

The following ALERTS were generated. Each ALERT has the format

**test-name\_ALERT\_alert-type\_alert-level.**

Click on the hyperlinks for more details of the test.

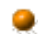

### Alert level B

PLAT430\_ALERT\_2\_B Short Inter D...A Contact O3 ..O3 2.65 Ang.

**Author Response: O3 belongs to a carboxylate group without H. This is a correct atom distance. This is a false alert.**

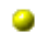

### Alert level C

PLAT029\_ALERT\_3\_C \_diffn\_measured\_fraction\_theta\_full value Low . 0.978 Why?  
PLAT213\_ALERT\_2\_C Atom Zr1 has ADP max/min Ratio ..... 3.7 prolat  
PLAT213\_ALERT\_2\_C Atom O5 has ADP max/min Ratio ..... 3.4 prolat  
PLAT213\_ALERT\_2\_C Atom O7 has ADP max/min Ratio ..... 3.3 prolat  
PLAT241\_ALERT\_2\_C High 'MainMol' Ueq as Compared to Neighbors of 02 Check  
PLAT241\_ALERT\_2\_C High 'MainMol' Ueq as Compared to Neighbors of 05 Check  
PLAT241\_ALERT\_2\_C High 'MainMol' Ueq as Compared to Neighbors of 06 Check  
PLAT241\_ALERT\_2\_C High 'MainMol' Ueq as Compared to Neighbors of 07 Check  
PLAT241\_ALERT\_2\_C High 'MainMol' Ueq as Compared to Neighbors of C12 Check  
PLAT241\_ALERT\_2\_C High 'MainMol' Ueq as Compared to Neighbors of C13 Check  
PLAT242\_ALERT\_2\_C Low 'MainMol' Ueq as Compared to Neighbors of Zr1 Check  
PLAT242\_ALERT\_2\_C Low 'MainMol' Ueq as Compared to Neighbors of Zr2 Check  
PLAT242\_ALERT\_2\_C Low 'MainMol' Ueq as Compared to Neighbors of Zr3 Check  
PLAT250\_ALERT\_2\_C Large U3/U1 Ratio for Average U(i,j) Tensor .... 3.7 Note  
PLAT334\_ALERT\_2\_C Small Aver. Benzene C-C Dist C8 -C13 1.37 Ang.  
PLAT342\_ALERT\_3\_C Low Bond Precision on C-C Bonds ..... 0.00869 Ang.

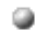

### Alert level G

PLAT003\_ALERT\_2\_G Number of Uiso or Uij Restrained non-H Atoms ... 30 Report  
PLAT004\_ALERT\_5\_G Polymeric Structure Found with Maximum Dimension 3 Info  
PLAT012\_ALERT\_1\_G No \_shelx\_res\_checksum Found in CIF ..... Please Check  
PLAT014\_ALERT\_1\_G No \_shelx\_fab\_checksum Found in CIF ..... Please Check  
PLAT042\_ALERT\_1\_G Calc. and Reported MoietyFormula Strings Differ Please Check  
PLAT045\_ALERT\_1\_G Calculated and Reported Z Differ by a Factor ... 2.00 Check  
PLAT083\_ALERT\_2\_G SHELXL Second Parameter in WGHT Unusually Large 104.28 Why ?  
PLAT606\_ALERT\_4\_G VERY LARGE Solvent Accessible VOID(S) in Structure ! Info  
PLAT764\_ALERT\_4\_G Overcomplete CIF Bond List Detected (Rep/Expd) . 1.23 Ratio  
PLAT794\_ALERT\_5\_G Tentative Bond Valency for Zr1 (IV) . 4.00 Info  
PLAT794\_ALERT\_5\_G Tentative Bond Valency for Zr2 (IV) . 4.11 Info  
PLAT794\_ALERT\_5\_G Tentative Bond Valency for Zr3 (IV) . 4.02 Info  
PLAT860\_ALERT\_3\_G Number of Least-Squares Restraints ..... 511 Note  
PLAT869\_ALERT\_4\_G ALERTS Related to the Use of SQUEEZE Suppressed ! Info

0 **ALERT level A** = Most likely a serious problem - resolve or explain

1 **ALERT level B** = A potentially serious problem, consider carefully

16 **ALERT level C** = Check. Ensure it is not caused by an omission or oversight

14 **ALERT level G** = General information/check it is not something unexpected

4 ALERT type 1 CIF construction/syntax error, inconsistent or missing data

17 ALERT type 2 Indicator that the structure model may be wrong or deficient

3 ALERT type 3 Indicator that the structure quality may be low

3 ALERT type 4 Improvement, methodology, query or suggestion

4 ALERT type 5 Informative message, check

---

It is advisable to attempt to resolve as many as possible of the alerts in all categories. Often the minor alerts point to easily fixed oversights, errors and omissions in your CIF or refinement strategy, so attention to these fine details can be worthwhile. In order to resolve some of the more serious problems it may be necessary to carry out additional measurements or structure refinements. However, the purpose of your study may justify the reported deviations and the more serious of these should normally be commented upon in the discussion or experimental section of a paper or in the "special\_details" fields of the CIF. checkCIF was carefully designed to identify outliers and unusual parameters, but every test has its limitations and alerts that are not important in a particular case may appear. Conversely, the absence of alerts does not guarantee there are no aspects of the results needing attention. It is up to the individual to critically assess their own results and, if necessary, seek expert advice.

### **Publication of your CIF in IUCr journals**

A basic structural check has been run on your CIF. These basic checks will be run on all CIFs submitted for publication in IUCr journals (*Acta Crystallographica*, *Journal of Applied Crystallography*, *Journal of Synchrotron Radiation*); however, if you intend to submit to *Acta Crystallographica Section C* or *E* or *IUCrData*, you should make sure that full publication checks are run on the final version of your CIF prior to submission.

### **Publication of your CIF in other journals**

Please refer to the *Notes for Authors* of the relevant journal for any special instructions relating to CIF submission.

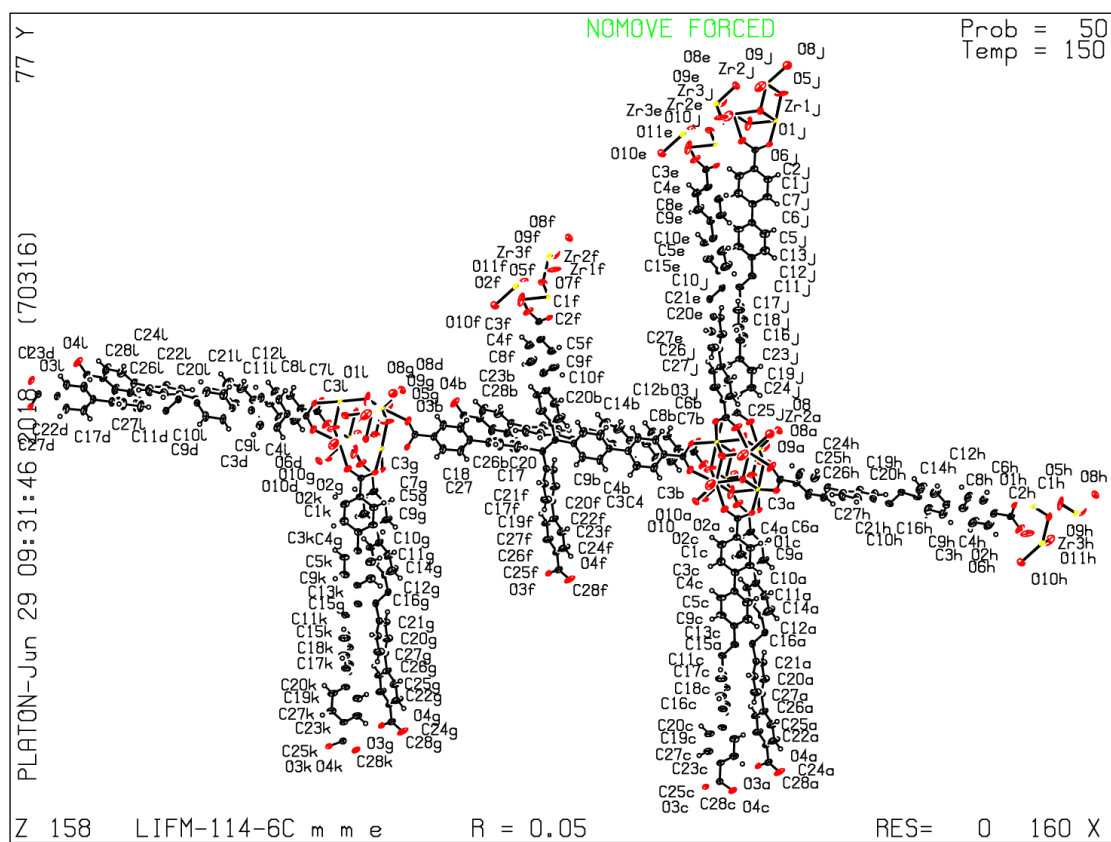

Supplement: Supplementary file 1 [file 16775912 › LIFM-114-60C-checkcif.pdf]
