# Supplementary material
Source: publisher figshare collection journal article supplement (https://acs.figshare.com/ndownloader/files/16775912)

# checkCIF/PLATON report

You have not supplied any structure factors. As a result the full set of tests cannot be run.

THIS REPORT IS FOR GUIDANCE ONLY. IF USED AS PART OF A REVIEW PROCEDURE FOR PUBLICATION, IT SHOULD NOT REPLACE THE EXPERTISE OF AN EXPERIENCED CRYSTALLOGRAPHIC REFEREE.

No syntax errors found.      CIF dictionary      Interpreting this report

## Datablock: LIFM-114-Acetone

---

|                                                               |                                                      |                                 |
|---------------------------------------------------------------|------------------------------------------------------|---------------------------------|
| Bond precision:                                               | C-C = 0.0083 A                                       | Wavelength=1.54184              |
| Cell:                                                         | a=21.1937(18)                                        | b=42.4945(15)      c=17.8951(6) |
|                                                               | alpha=90                                             | beta=90      gamma=90           |
| Temperature:                                                  | 150 K                                                |                                 |
|                                                               | Calculated                                           | Reported                        |
| Volume                                                        | 16116.6(16)                                          | 16116.6(16)                     |
| Space group                                                   | C m m m                                              | C m m m                         |
| Hall group                                                    | -C 2 2                                               | -C 2 2                          |
| Moiety formula                                                | C53 H32 O16 Zr3, 2(C27 H16 O8 Zr1.50), C [+ solvent] | C108 H64 O32 Zr6 +[SOLVENT]     |
| Sum formula                                                   | C108 H64 O32 Zr6 [+ solvent]                         | C108 H64 O32 Zr6                |
| Mr                                                            | 2420.91                                              | 2420.91                         |
| Dx, g cm-3                                                    | 0.998                                                | 0.998                           |
| Z                                                             | 4                                                    | 4                               |
| Mu (mm-1)                                                     | 3.506                                                | 3.506                           |
| F000                                                          | 4832.0                                               | 4832.0                          |
| F000'                                                         | 4840.85                                              |                                 |
| h,k,lmax                                                      | 24,49,20                                             | 23,48,20                        |
| Nref                                                          | 7182                                                 | 6892                            |
| Tmin,Tmax                                                     | 0.689,0.704                                          | 0.599,1.000                     |
| Tmin'                                                         | 0.333                                                |                                 |
| Correction method= # Reported T Limits: Tmin=0.599 Tmax=1.000 |                                                      |                                 |
| AbsCorr = MULTI-SCAN                                          |                                                      |                                 |
| Data completeness=                                            | 0.960                                                | Theta(max)= 63.595              |
| R(reflections)=                                               | 0.1175( 5644)                                        | wR2(reflections)= 0.3607( 6892) |
| S =                                                           | 1.609                                                | Npar= 755                       |

---

The following ALERTS were generated. Each ALERT has the format

**test-name\_ALERT\_alert-type\_alert-level.**

Click on the hyperlinks for more details of the test.

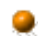

#### Alert level B

PLAT084\_ALERT\_3\_B High wR2 Value (i.e. > 0.25) ..... 0.36 Report

**Author Response: We have used Cu radiation, long exposure time, and best crystal to obtain best data set. Besides, the structure is highly disorder.**

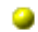

#### Alert level C

DIFMN02\_ALERT\_2\_C The minimum difference density is < -0.1\*ZMAX\*0.75  
\_refine\_diff\_density\_min given = -3.326  
Test value = -3.000

DIFMN03\_ALERT\_1\_C The minimum difference density is < -0.1\*ZMAX\*0.75  
The relevant atom site should be identified.

REFNR01\_ALERT\_3\_C Ratio of reflections to parameters is < 10 for a  
centrosymmetric structure  
sine(theta)/lambda 0.5809  
Proportion of unique data used 1.0000  
Ratio reflections to parameters 9.1285

THETM01\_ALERT\_3\_C The value of sine(theta\_max)/wavelength is less than 0.590  
Calculated sin(theta\_max)/wavelength = 0.5809

PLAT029\_ALERT\_3\_C \_diffrn\_measured\_fraction\_theta\_full value Low . 0.960 Why?

PLAT082\_ALERT\_2\_C High R1 Value ..... 0.12 Report

PLAT088\_ALERT\_3\_C Poor Data / Parameter Ratio ..... 9.51 Note

PLAT098\_ALERT\_2\_C Large Reported Min. (Negative) Residual Density -3.33 eA-3

PLAT213\_ALERT\_2\_C Atom O4C has ADP max/min Ratio .... 3.1 prolat

PLAT241\_ALERT\_2\_C High 'MainMol' Ueq as Compared to Neighbors of 05 Check

PLAT241\_ALERT\_2\_C High 'MainMol' Ueq as Compared to Neighbors of 06 Check

PLAT241\_ALERT\_2\_C High 'MainMol' Ueq as Compared to Neighbors of C4 Check

PLAT242\_ALERT\_2\_C Low 'MainMol' Ueq as Compared to Neighbors of Zr1 Check

PLAT242\_ALERT\_2\_C Low 'MainMol' Ueq as Compared to Neighbors of Zr2 Check

PLAT242\_ALERT\_2\_C Low 'MainMol' Ueq as Compared to Neighbors of C2 Check

PLAT250\_ALERT\_2\_C Large U3/U1 Ratio for Average U(i,j) Tensor .... 4.0 Note

PLAT342\_ALERT\_3\_C Low Bond Precision on C-C Bonds ..... 0.0083 Ang.

PLAT410\_ALERT\_2\_C Short Intra H...H Contact H4 ..H9A . 1.97 Ang.

PLAT410\_ALERT\_2\_C Short Intra H...H Contact H6 ..H13A . 1.95 Ang.

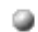

#### Alert level G

PLAT002\_ALERT\_2\_G Number of Distance or Angle Restraints on AtSite 50 Note

PLAT003\_ALERT\_2\_G Number of Uiso or Uij Restrained non-H Atoms ... 90 Report

PLAT004\_ALERT\_5\_G Polymeric Structure Found with Maximum Dimension 3 Info

PLAT012\_ALERT\_1\_G No \_shelx\_res\_checksum Found in CIF ..... Please Check

PLAT014\_ALERT\_1\_G No \_shelx\_fab\_checksum Found in CIF ..... Please Check

PLAT042\_ALERT\_1\_G Calc. and Reported MoietyFormula Strings Differ Please Check

PLAT072\_ALERT\_2\_G SHELXL First Parameter in WGHT Unusually Large 0.20 Report

PLAT300\_ALERT\_4\_G Atom Site Occupancy of Zr3 Constrained at 0.25 Check

PLAT300\_ALERT\_4\_G Atom Site Occupancy of Zr4 Constrained at 0.25 Check

PLAT300\_ALERT\_4\_G Atom Site Occupancy of Zr5 Constrained at 0.25 Check

PLAT300\_ALERT\_4\_G Atom Site Occupancy of Zr6 Constrained at 0.25 Check

PLAT300\_ALERT\_4\_G Atom Site Occupancy of O3 Constrained at 0.25 Check

PLAT300\_ALERT\_4\_G Atom Site Occupancy of O3A Constrained at 0.25 Check

PLAT300\_ALERT\_4\_G Atom Site Occupancy of O3B Constrained at 0.25 Check

[illegible]

|                   |                                                    |                |       |       |
|-------------------|----------------------------------------------------|----------------|-------|-------|
| PLAT300_ALERT_4_G | Atom Site Occupancy of C26C                        | Constrained at | 0.25  | Check |
| PLAT300_ALERT_4_G | Atom Site Occupancy of C27                         | Constrained at | 0.25  | Check |
| PLAT300_ALERT_4_G | Atom Site Occupancy of C27A                        | Constrained at | 0.25  | Check |
| PLAT300_ALERT_4_G | Atom Site Occupancy of C27B                        | Constrained at | 0.25  | Check |
| PLAT300_ALERT_4_G | Atom Site Occupancy of C27C                        | Constrained at | 0.25  | Check |
| PLAT300_ALERT_4_G | Atom Site Occupancy of C28                         | Constrained at | 0.25  | Check |
| PLAT300_ALERT_4_G | Atom Site Occupancy of H17                         | Constrained at | 0.25  | Check |
| PLAT300_ALERT_4_G | Atom Site Occupancy of H17A                        | Constrained at | 0.25  | Check |
| PLAT300_ALERT_4_G | Atom Site Occupancy of H17B                        | Constrained at | 0.25  | Check |
| PLAT300_ALERT_4_G | Atom Site Occupancy of H17C                        | Constrained at | 0.25  | Check |
| PLAT300_ALERT_4_G | Atom Site Occupancy of H18                         | Constrained at | 0.25  | Check |
| PLAT300_ALERT_4_G | Atom Site Occupancy of H18A                        | Constrained at | 0.25  | Check |
| PLAT300_ALERT_4_G | Atom Site Occupancy of H18B                        | Constrained at | 0.25  | Check |
| PLAT300_ALERT_4_G | Atom Site Occupancy of H18C                        | Constrained at | 0.25  | Check |
| PLAT300_ALERT_4_G | Atom Site Occupancy of H20                         | Constrained at | 0.25  | Check |
| PLAT300_ALERT_4_G | Atom Site Occupancy of H20A                        | Constrained at | 0.25  | Check |
| PLAT300_ALERT_4_G | Atom Site Occupancy of H20B                        | Constrained at | 0.25  | Check |
| PLAT300_ALERT_4_G | Atom Site Occupancy of H20C                        | Constrained at | 0.25  | Check |
| PLAT300_ALERT_4_G | Atom Site Occupancy of H21                         | Constrained at | 0.25  | Check |
| PLAT300_ALERT_4_G | Atom Site Occupancy of H21A                        | Constrained at | 0.25  | Check |
| PLAT300_ALERT_4_G | Atom Site Occupancy of H21B                        | Constrained at | 0.25  | Check |
| PLAT300_ALERT_4_G | Atom Site Occupancy of H21C                        | Constrained at | 0.25  | Check |
| PLAT300_ALERT_4_G | Atom Site Occupancy of H23                         | Constrained at | 0.25  | Check |
| PLAT300_ALERT_4_G | Atom Site Occupancy of H23A                        | Constrained at | 0.25  | Check |
| PLAT300_ALERT_4_G | Atom Site Occupancy of H23B                        | Constrained at | 0.25  | Check |
| PLAT300_ALERT_4_G | Atom Site Occupancy of H23C                        | Constrained at | 0.25  | Check |
| PLAT300_ALERT_4_G | Atom Site Occupancy of H24                         | Constrained at | 0.25  | Check |
| PLAT300_ALERT_4_G | Atom Site Occupancy of H24A                        | Constrained at | 0.25  | Check |
| PLAT300_ALERT_4_G | Atom Site Occupancy of H24B                        | Constrained at | 0.25  | Check |
| PLAT300_ALERT_4_G | Atom Site Occupancy of H24C                        | Constrained at | 0.25  | Check |
| PLAT300_ALERT_4_G | Atom Site Occupancy of H26                         | Constrained at | 0.25  | Check |
| PLAT300_ALERT_4_G | Atom Site Occupancy of H26A                        | Constrained at | 0.25  | Check |
| PLAT300_ALERT_4_G | Atom Site Occupancy of H26B                        | Constrained at | 0.25  | Check |
| PLAT300_ALERT_4_G | Atom Site Occupancy of H26C                        | Constrained at | 0.25  | Check |
| PLAT300_ALERT_4_G | Atom Site Occupancy of H27                         | Constrained at | 0.25  | Check |
| PLAT300_ALERT_4_G | Atom Site Occupancy of H27A                        | Constrained at | 0.25  | Check |
| PLAT300_ALERT_4_G | Atom Site Occupancy of H27B                        | Constrained at | 0.25  | Check |
| PLAT300_ALERT_4_G | Atom Site Occupancy of H27C                        | Constrained at | 0.25  | Check |
| PLAT300_ALERT_4_G | Atom Site Occupancy of C29                         | Constrained at | 0.5   | Check |
| PLAT301_ALERT_3_G | Main Residue Disorder .....(Resd 1 )               |                | 100%  | Note  |
| PLAT302_ALERT_4_G | Anion/Solvent/Minor-Residue Disorder (Resd 2 )     |                | 21%   | Note  |
| PLAT302_ALERT_4_G | Anion/Solvent/Minor-Residue Disorder (Resd 3 )     |                | 100%  | Note  |
| PLAT432_ALERT_2_G | Short Inter X...Y Contact C4 ..C18A                |                | 2.84  | Ang.  |
| PLAT606_ALERT_4_G | VERY LARGE Solvent Accessible VOID(S) in Structure |                | !     | Info  |
| PLAT764_ALERT_4_G | Overcomplete CIF Bond List Detected (Rep/Expd) .   |                | 1.54  | Ratio |
| PLAT773_ALERT_2_G | Check long C-C Bond in CIF: C28 --C29              |                | 1.73  | Ang.  |
| PLAT773_ALERT_2_G | Check long C-C Bond in CIF: C29 --C28              |                | 1.73  | Ang.  |
| PLAT773_ALERT_2_G | Check long C-C Bond in CIF: C29 --C28              |                | 1.73  | Ang.  |
| PLAT773_ALERT_2_G | Check long C-C Bond in CIF: C25B --C25B            |                | 1.71  | Ang.  |
| PLAT773_ALERT_2_G | Check long C-C Bond in CIF: C25B --C26B            |                | 1.96  | Ang.  |
| PLAT773_ALERT_2_G | Check long C-C Bond in CIF: C24C --C25C            |                | 2.02  | Ang.  |
| PLAT773_ALERT_2_G | Check long C-C Bond in CIF: C25C --C24C            |                | 2.02  | Ang.  |
| PLAT779_ALERT_4_G | Suspect or Irrelevant (Bond) Angle in CIF .... #   |                | 357   | Check |
|                   | ZR5 -O3 -ZR3 10.000 1.555 1.555                    |                | 43.30 | Deg.  |
| PLAT779_ALERT_4_G | Suspect or Irrelevant (Bond) Angle in CIF .... #   |                | 360   | Check |
|                   | ZR6 -O3 -ZR4 9.765 1.555 10.000                    |                | 22.10 | Deg.  |
| PLAT779_ALERT_4_G | Suspect or Irrelevant (Bond) Angle in CIF .... #   |                | 361   | Check |
|                   | O9 -O3 -ZR3 10.000 1.555 1.555                     |                | 35.40 | Deg.  |
| PLAT779_ALERT_4_G | Suspect or Irrelevant (Bond) Angle in CIF .... #   |                | 364   | Check |
|                   | O9 -O3 -ZR6 10.000 1.555 9.765                     |                | 44.70 | Deg.  |
| PLAT779_ALERT_4_G | Suspect or Irrelevant (Bond) Angle in CIF .... #   |                | 370   | Check |
|                   | ZR4 -O4 -ZR4 10.000 1.555 1.555                    |                | 42.70 | Deg.  |

|                   |                       |                     |        |       |       |
|-------------------|-----------------------|---------------------|--------|-------|-------|
| PLAT779_ALERT_4_G | Suspect or Irrelevant | (Bond) Angle in CIF | .... # | 372   | Check |
| ZR4 -O4 -ZR6      | 10.000                | 1.555 9.765         |        | 18.60 | Deg.  |
| PLAT779_ALERT_4_G | Suspect or Irrelevant | (Bond) Angle in CIF | .... # | 388   | Check |
| ZR3 -O9 -ZR3      | 10.000                | 1.555 3.565         |        | 4.60  | Deg.  |
| PLAT779_ALERT_4_G | Suspect or Irrelevant | (Bond) Angle in CIF | .... # | 401   | Check |
| ZR6 -O9 -ZR4      | 2.765                 | 1.555 1.555         |        | 26.60 | Deg.  |
| PLAT779_ALERT_4_G | Suspect or Irrelevant | (Bond) Angle in CIF | .... # | 411   | Check |
| O9 -O9 -ZR3       | 10.000                | 1.555 1.555         |        | 37.00 | Deg.  |
| PLAT779_ALERT_4_G | Suspect or Irrelevant | (Bond) Angle in CIF | .... # | 416   | Check |
| O10 -O9 -ZR3      | 12.565                | 1.555 3.565         |        | 5.00  | Deg.  |
| PLAT779_ALERT_4_G | Suspect or Irrelevant | (Bond) Angle in CIF | .... # | 417   | Check |
| O10 -O9 -ZR3      | 12.565                | 1.555 10.000        |        | 7.60  | Deg.  |
| PLAT779_ALERT_4_G | Suspect or Irrelevant | (Bond) Angle in CIF | .... # | 434   | Check |
| O4A -O9 -ZR4      | 13.655                | 1.555 1.555         |        | 36.70 | Deg.  |
| PLAT779_ALERT_4_G | Suspect or Irrelevant | (Bond) Angle in CIF | .... # | 446   | Check |
| ZR3 -O10 -ZR3     | 3.565                 | 1.555 10.000        |        | 22.00 | Deg.  |
| PLAT779_ALERT_4_G | Suspect or Irrelevant | (Bond) Angle in CIF | .... # | 450   | Check |
| ZR3 -O10 -ZR3     | 12.565                | 1.555 1.555         |        | 25.00 | Deg.  |
| PLAT779_ALERT_4_G | Suspect or Irrelevant | (Bond) Angle in CIF | .... # | 454   | Check |
| ZR3 -O10 -ZR5     | 3.565                 | 1.555 1.555         |        | 23.00 | Deg.  |
| PLAT779_ALERT_4_G | Suspect or Irrelevant | (Bond) Angle in CIF | .... # | 456   | Check |
| ZR3 -O10 -ZR5     | 10.000                | 1.555 1.555         |        | 44.80 | Deg.  |
| PLAT779_ALERT_4_G | Suspect or Irrelevant | (Bond) Angle in CIF | .... # | 466   | Check |
| ZR3 -O10 -O10     | 3.565                 | 1.555 12.565        |        | 31.00 | Deg.  |
| PLAT779_ALERT_4_G | Suspect or Irrelevant | (Bond) Angle in CIF | .... # | 467   | Check |
| ZR3 -O10 -O10     | 10.000                | 1.555 12.565        |        | 8.50  | Deg.  |
| PLAT779_ALERT_4_G | Suspect or Irrelevant | (Bond) Angle in CIF | .... # | 474   | Check |
| ZR5 -O10 -ZR5     | 12.565                | 1.555 1.555         |        | 28.10 | Deg.  |
| PLAT779_ALERT_4_G | Suspect or Irrelevant | (Bond) Angle in CIF | .... # | 481   | Check |
| ZR6 -O10 -ZR6     | 1.555                 | 1.555 10.000        |        | 37.00 | Deg.  |
| PLAT779_ALERT_4_G | Suspect or Irrelevant | (Bond) Angle in CIF | .... # | 492   | Check |
| O10 -O10 -ZR3     | 10.000                | 1.555 1.555         |        | 35.10 | Deg.  |
| PLAT779_ALERT_4_G | Suspect or Irrelevant | (Bond) Angle in CIF | .... # | 495   | Check |
| O10 -O10 -ZR3     | 10.000                | 1.555 12.565        |        | 10.00 | Deg.  |
| PLAT779_ALERT_4_G | Suspect or Irrelevant | (Bond) Angle in CIF | .... # | 510   | Check |
| O12 -O10 -ZR6     | 10.000                | 1.555 1.555         |        | 33.00 | Deg.  |
| PLAT779_ALERT_4_G | Suspect or Irrelevant | (Bond) Angle in CIF | .... # | 514   | Check |
| ZR3 -O11 -ZR3     | 11.755                | 1.555 2.765         |        | 17.20 | Deg.  |
| PLAT779_ALERT_4_G | Suspect or Irrelevant | (Bond) Angle in CIF | .... # | 517   | Check |
| ZR3 -O11 -ZR5     | 1.555                 | 1.555 10.000        |        | 35.60 | Deg.  |
| PLAT779_ALERT_4_G | Suspect or Irrelevant | (Bond) Angle in CIF | .... # | 519   | Check |
| ZR3 -O11 -ZR5     | 11.755                | 1.555 4.755         |        | 35.60 | Deg.  |
| PLAT779_ALERT_4_G | Suspect or Irrelevant | (Bond) Angle in CIF | .... # | 525   | Check |
| ZR4 -O11 -ZR4     | 10.000                | 1.555 1.555         |        | 44.10 | Deg.  |
| PLAT779_ALERT_4_G | Suspect or Irrelevant | (Bond) Angle in CIF | .... # | 534   | Check |
| ZR5 -O11 -ZR3     | 4.755                 | 1.555 2.765         |        | 40.30 | Deg.  |
| PLAT779_ALERT_4_G | Suspect or Irrelevant | (Bond) Angle in CIF | .... # | 542   | Check |
| ZR6 -O11 -ZR4     | 2.765                 | 1.555 1.555         |        | 27.70 | Deg.  |
| PLAT779_ALERT_4_G | Suspect or Irrelevant | (Bond) Angle in CIF | .... # | 543   | Check |
| ZR6 -O11 -ZR4     | 9.765                 | 1.555 10.000        |        | 2.00  | Deg.  |
| PLAT779_ALERT_4_G | Suspect or Irrelevant | (Bond) Angle in CIF | .... # | 544   | Check |
| ZR6 -O11 -ZR4     | 9.765                 | 1.555 1.555         |        | 42.00 | Deg.  |
| PLAT779_ALERT_4_G | Suspect or Irrelevant | (Bond) Angle in CIF | .... # | 556   | Check |
| O11 -O11 -ZR4     | 10.000                | 1.555 1.555         |        | 41.70 | Deg.  |
| PLAT779_ALERT_4_G | Suspect or Irrelevant | (Bond) Angle in CIF | .... # | 559   | Check |
| O11 -O11 -ZR6     | 10.000                | 1.555 2.765         |        | 13.90 | Deg.  |
| PLAT779_ALERT_4_G | Suspect or Irrelevant | (Bond) Angle in CIF | .... # | 561   | Check |
| O12 -O11 -ZR3     | 2.765                 | 1.555 2.765         |        | 42.00 | Deg.  |
| PLAT779_ALERT_4_G | Suspect or Irrelevant | (Bond) Angle in CIF | .... # | 580   | Check |
| ZR3 -O12 -ZR3     | 12.565                | 1.555 1.555         |        | 24.80 | Deg.  |
| PLAT779_ALERT_4_G | Suspect or Irrelevant | (Bond) Angle in CIF | .... # | 591   | Check |
| ZR6 -O12 -ZR4     | 10.000                | 1.555 9.765         |        | 3.70  | Deg.  |

|                   |                       |                     |        |       |       |
|-------------------|-----------------------|---------------------|--------|-------|-------|
| PLAT779_ALERT_4_G | Suspect or Irrelevant | (Bond) Angle in CIF | .... # | 598   | Check |
| O10 -O12 -ZR3     | 10.000                | 1.555 1.555         |        | 35.30 | Deg.  |
| PLAT779_ALERT_4_G | Suspect or Irrelevant | (Bond) Angle in CIF | .... # | 599   | Check |
| O10 -O12 -ZR3     | 4.755                 | 1.555 2.765         |        | 11.70 | Deg.  |
| PLAT779_ALERT_4_G | Suspect or Irrelevant | (Bond) Angle in CIF | .... # | 600   | Check |
| O10 -O12 -ZR3     | 10.000                | 1.555 12.565        |        | 11.70 | Deg.  |
| PLAT779_ALERT_4_G | Suspect or Irrelevant | (Bond) Angle in CIF | .... # | 612   | Check |
| O11 -O12 -ZR4     | 2.765                 | 1.555 9.765         |        | 7.00  | Deg.  |
| PLAT779_ALERT_4_G | Suspect or Irrelevant | (Bond) Angle in CIF | .... # | 613   | Check |
| O11 -O12 -ZR6     | 2.765                 | 1.555 1.555         |        | 44.00 | Deg.  |
| PLAT779_ALERT_4_G | Suspect or Irrelevant | (Bond) Angle in CIF | .... # | 614   | Check |
| O11 -O12 -ZR6     | 2.765                 | 1.555 10.000        |        | 3.00  | Deg.  |
| PLAT779_ALERT_4_G | Suspect or Irrelevant | (Bond) Angle in CIF | .... # | 643   | Check |
| O12A -O12 -O11A   | 1.555                 | 1.555 2.765         |        | 41.30 | Deg.  |
| PLAT779_ALERT_4_G | Suspect or Irrelevant | (Bond) Angle in CIF | .... # | 644   | Check |
| ZR3 -O13 -ZR3     | 1.555                 | 1.555 12.565        |        | 24.10 | Deg.  |
| PLAT779_ALERT_4_G | Suspect or Irrelevant | (Bond) Angle in CIF | .... # | 645   | Check |
| ZR5 -O13 -ZR3     | 3.565                 | 1.555 12.565        |        | 35.70 | Deg.  |
| PLAT779_ALERT_4_G | Suspect or Irrelevant | (Bond) Angle in CIF | .... # | 646   | Check |
| ZR5 -O13 -ZR3     | 10.000                | 1.555 1.555         |        | 13.00 | Deg.  |
| PLAT779_ALERT_4_G | Suspect or Irrelevant | (Bond) Angle in CIF | .... # | 647   | Check |
| ZR5 -O13 -ZR3     | 10.000                | 1.555 12.565        |        | 37.00 | Deg.  |
| PLAT779_ALERT_4_G | Suspect or Irrelevant | (Bond) Angle in CIF | .... # | 659   | Check |
| O13 -O13 -ZR5     | 12.565                | 1.555 3.565         |        | 33.10 | Deg.  |
| PLAT779_ALERT_4_G | Suspect or Irrelevant | (Bond) Angle in CIF | .... # | 667   | Check |
| O15 -O13 -O15     | 10.000                | 1.555 3.565         |        | 31.40 | Deg.  |
| PLAT779_ALERT_4_G | Suspect or Irrelevant | (Bond) Angle in CIF | .... # | 673   | Check |
| ZR3 -O14 -ZR3     | 1.555                 | 1.555 12.565        |        | 23.30 | Deg.  |
| PLAT779_ALERT_4_G | Suspect or Irrelevant | (Bond) Angle in CIF | .... # | 675   | Check |
| ZR3 -O14 -ZR5     | 1.555                 | 1.555 10.000        |        | 34.40 | Deg.  |
| PLAT779_ALERT_4_G | Suspect or Irrelevant | (Bond) Angle in CIF | .... # | 676   | Check |
| ZR3 -O14 -ZR5     | 12.565                | 1.555 10.000        |        | 41.40 | Deg.  |
| PLAT779_ALERT_4_G | Suspect or Irrelevant | (Bond) Angle in CIF | .... # | 687   | Check |
| ZR5 -O15 -ZR5     | 1.555                 | 1.555 12.565        |        | 26.40 | Deg.  |
| PLAT779_ALERT_4_G | Suspect or Irrelevant | (Bond) Angle in CIF | .... # | 688   | Check |
| O13 -O15 -ZR5     | 10.000                | 1.555 12.565        |        | 21.10 | Deg.  |
| PLAT779_ALERT_4_G | Suspect or Irrelevant | (Bond) Angle in CIF | .... # | 689   | Check |
| O13 -O15 -ZR5     | 3.565                 | 1.555 1.555         |        | 29.50 | Deg.  |
| PLAT779_ALERT_4_G | Suspect or Irrelevant | (Bond) Angle in CIF | .... # | 690   | Check |
| O13 -O15 -ZR5     | 3.565                 | 1.555 12.565        |        | 3.10  | Deg.  |
| PLAT779_ALERT_4_G | Suspect or Irrelevant | (Bond) Angle in CIF | .... # | 691   | Check |
| O13 -O15 -ZR5     | 10.000                | 1.555 1.555         |        | 5.30  | Deg.  |
| PLAT779_ALERT_4_G | Suspect or Irrelevant | (Bond) Angle in CIF | .... # | 692   | Check |
| O13 -O15 -O13     | 10.000                | 1.555 3.565         |        | 24.00 | Deg.  |
| PLAT779_ALERT_4_G | Suspect or Irrelevant | (Bond) Angle in CIF | .... # | 697   | Check |
| ZR5 -O16 -ZR3     | 12.565                | 1.555 10.000        |        | 43.60 | Deg.  |
| PLAT779_ALERT_4_G | Suspect or Irrelevant | (Bond) Angle in CIF | .... # | 698   | Check |
| ZR5 -O16 -ZR3     | 1.555                 | 1.555 10.000        |        | 37.80 | Deg.  |
| PLAT779_ALERT_4_G | Suspect or Irrelevant | (Bond) Angle in CIF | .... # | 699   | Check |
| ZR5 -O16 -ZR5     | 1.555                 | 1.555 12.565        |        | 25.30 | Deg.  |
| PLAT779_ALERT_4_G | Suspect or Irrelevant | (Bond) Angle in CIF | .... # | 704   | Check |
| O3A -O16 -ZR3     | 13.655                | 1.555 10.000        |        | 31.90 | Deg.  |
| PLAT779_ALERT_4_G | Suspect or Irrelevant | (Bond) Angle in CIF | .... # | 739   | Check |
| ZR4 -C15 -ZR6     | 10.000                | 1.555 9.765         |        | 20.20 | Deg.  |
| PLAT779_ALERT_4_G | Suspect or Irrelevant | (Bond) Angle in CIF | .... # | 743   | Check |
| O4 -C15 -ZR4      | 1.555                 | 1.555 10.000        |        | 44.00 | Deg.  |
| PLAT779_ALERT_4_G | Suspect or Irrelevant | (Bond) Angle in CIF | .... # | 771   | Check |
| C29 -C28 -C29     | 1.555                 | 1.555 13.656        |        | 34.90 | Deg.  |
| PLAT779_ALERT_4_G | Suspect or Irrelevant | (Bond) Angle in CIF | .... # | 774   | Check |
| C28 -C29 -C28     | 1.555                 | 1.555 6.655         |        | 34.20 | Deg.  |
| PLAT779_ALERT_4_G | Suspect or Irrelevant | (Bond) Angle in CIF | .... # | 775   | Check |
| C28 -C29 -C28     | 10.556                | 1.555 13.656        |        | 34.20 | Deg.  |

|                   |                       |                     |        |       |       |
|-------------------|-----------------------|---------------------|--------|-------|-------|
| PLAT779_ALERT_4_G | Suspect or Irrelevant | (Bond) Angle in CIF | .... # | 782   | Check |
| ZR3 -O3A -ZR3     | 6.655                 | 1.555               | 15.645 | 17.50 | Deg.  |
| PLAT779_ALERT_4_G | Suspect or Irrelevant | (Bond) Angle in CIF | .... # | 784   | Check |
| ZR3 -O3A -ZR5     | 15.645                | 1.555               | 8.645  | 39.50 | Deg.  |
| PLAT779_ALERT_4_G | Suspect or Irrelevant | (Bond) Angle in CIF | .... # | 790   | Check |
| ZR5 -O3A -ZR5     | 13.655                | 1.555               | 8.645  | 20.60 | Deg.  |
| PLAT779_ALERT_4_G | Suspect or Irrelevant | (Bond) Angle in CIF | .... # | 798   | Check |
| O9 -O3A -ZR6      | 13.655                | 1.555               | 14.445 | 30.10 | Deg.  |
| PLAT779_ALERT_4_G | Suspect or Irrelevant | (Bond) Angle in CIF | .... # | 813   | Check |
| ZR4 -O4A -ZR6     | 6.655                 | 1.555               | 5.445  | 27.40 | Deg.  |
| PLAT779_ALERT_4_G | Suspect or Irrelevant | (Bond) Angle in CIF | .... # | 815   | Check |
| ZR4 -O4A -ZR6     | 13.655                | 1.555               | 14.445 | 34.60 | Deg.  |
| PLAT779_ALERT_4_G | Suspect or Irrelevant | (Bond) Angle in CIF | .... # | 820   | Check |
| O9 -O4A -ZR3      | 13.655                | 1.555               | 6.655  | 13.20 | Deg.  |
| PLAT779_ALERT_4_G | Suspect or Irrelevant | (Bond) Angle in CIF | .... # | 844   | Check |
| ZR5 -O11A -ZR3    | 10.000                | 1.555               | 1.555  | 36.40 | Deg.  |
| PLAT779_ALERT_4_G | Suspect or Irrelevant | (Bond) Angle in CIF | .... # | 846   | Check |
| ZR5 -O11A -ZR3    | 4.755                 | 1.555               | 11.755 | 36.40 | Deg.  |
| PLAT779_ALERT_4_G | Suspect or Irrelevant | (Bond) Angle in CIF | .... # | 850   | Check |
| ZR6 -O11A -ZR4    | 9.765                 | 1.555               | 10.000 | 28.50 | Deg.  |
| PLAT779_ALERT_4_G | Suspect or Irrelevant | (Bond) Angle in CIF | .... # | 853   | Check |
| ZR6 -O11A -O12    | 9.765                 | 1.555               | 2.765  | 40.70 | Deg.  |
| PLAT779_ALERT_4_G | Suspect or Irrelevant | (Bond) Angle in CIF | .... # | 856   | Check |
| O11 -O11A -ZR4    | 1.555                 | 1.555               | 10.000 | 43.00 | Deg.  |
| PLAT779_ALERT_4_G | Suspect or Irrelevant | (Bond) Angle in CIF | .... # | 859   | Check |
| O11 -O11A -ZR6    | 1.555                 | 1.555               | 9.765  | 14.50 | Deg.  |
| PLAT779_ALERT_4_G | Suspect or Irrelevant | (Bond) Angle in CIF | .... # | 860   | Check |
| O11 -O11A -O12    | 1.555                 | 1.555               | 2.765  | 26.20 | Deg.  |
| PLAT779_ALERT_4_G | Suspect or Irrelevant | (Bond) Angle in CIF | .... # | 861   | Check |
| O12 -O11A -ZR3    | 2.765                 | 1.555               | 1.555  | 42.70 | Deg.  |
| PLAT779_ALERT_4_G | Suspect or Irrelevant | (Bond) Angle in CIF | .... # | 862   | Check |
| O12 -O11A -ZR3    | 2.765                 | 1.555               | 11.755 | 42.70 | Deg.  |
| PLAT779_ALERT_4_G | Suspect or Irrelevant | (Bond) Angle in CIF | .... # | 875   | Check |
| ZR3 -O12A -ZR3    | 12.565                | 1.555               | 1.555  | 20.71 | Deg.  |
| PLAT779_ALERT_4_G | Suspect or Irrelevant | (Bond) Angle in CIF | .... # | 876   | Check |
| ZR3 -O12A -ZR3    | 2.765                 | 1.555               | 11.755 | 20.71 | Deg.  |
| PLAT779_ALERT_4_G | Suspect or Irrelevant | (Bond) Angle in CIF | .... # | 881   | Check |
| ZR5 -O12A -ZR3    | 3.565                 | 1.555               | 1.555  | 44.20 | Deg.  |
| PLAT779_ALERT_4_G | Suspect or Irrelevant | (Bond) Angle in CIF | .... # | 884   | Check |
| ZR5 -O12A -ZR3    | 3.565                 | 1.555               | 12.565 | 40.30 | Deg.  |
| PLAT779_ALERT_4_G | Suspect or Irrelevant | (Bond) Angle in CIF | .... # | 887   | Check |
| ZR5 -O12A -ZR3    | 9.765                 | 1.555               | 11.755 | 44.20 | Deg.  |
| PLAT779_ALERT_4_G | Suspect or Irrelevant | (Bond) Angle in CIF | .... # | 891   | Check |
| ZR5 -O12A -ZR3    | 4.755                 | 1.555               | 11.755 | 36.20 | Deg.  |
| PLAT779_ALERT_4_G | Suspect or Irrelevant | (Bond) Angle in CIF | .... # | 893   | Check |
| ZR5 -O12A -ZR3    | 9.765                 | 1.555               | 2.765  | 40.30 | Deg.  |
| PLAT779_ALERT_4_G | Suspect or Irrelevant | (Bond) Angle in CIF | .... # | 895   | Check |
| ZR5 -O12A -ZR3    | 10.000                | 1.555               | 1.555  | 36.20 | Deg.  |
| PLAT779_ALERT_4_G | Suspect or Irrelevant | (Bond) Angle in CIF | .... # | 897   | Check |
| ZR5 -O12A -ZR5    | 9.765                 | 1.555               | 4.755  | 29.20 | Deg.  |
| PLAT779_ALERT_4_G | Suspect or Irrelevant | (Bond) Angle in CIF | .... # | 899   | Check |
| ZR5 -O12A -ZR5    | 3.565                 | 1.555               | 10.000 | 29.20 | Deg.  |
| PLAT779_ALERT_4_G | Suspect or Irrelevant | (Bond) Angle in CIF | .... # | 918   | Check |
| O12 -O12A -ZR6    | 1.555                 | 1.555               | 10.000 | 29.00 | Deg.  |
| PLAT779_ALERT_4_G | Suspect or Irrelevant | (Bond) Angle in CIF | .... # | 927   | Check |
| O11A -O12A -ZR6   | 2.765                 | 1.555               | 10.000 | 44.20 | Deg.  |
| PLAT779_ALERT_4_G | Suspect or Irrelevant | (Bond) Angle in CIF | .... # | 945   | Check |
| ZR3 -C15A -ZR5    | 6.655                 | 1.555               | 13.655 | 37.20 | Deg.  |
| PLAT779_ALERT_4_G | Suspect or Irrelevant | (Bond) Angle in CIF | .... # | 948   | Check |
| ZR4 -C15A -ZR6    | 13.655                | 1.555               | 14.445 | 24.00 | Deg.  |
| PLAT779_ALERT_4_G | Suspect or Irrelevant | (Bond) Angle in CIF | .... # | 950   | Check |
| O9 -C15A -ZR3     | 13.655                | 1.555               | 6.655  | 23.70 | Deg.  |

|                   |                                                  |       |             |
|-------------------|--------------------------------------------------|-------|-------------|
| PLAT779_ALERT_4_G | Suspect or Irrelevant (Bond) Angle in CIF .... # | 957   | Check       |
| O3A -C15A -ZR3    | 1.555 1.555 6.655                                | 31.30 | Deg.        |
| PLAT779_ALERT_4_G | Suspect or Irrelevant (Bond) Angle in CIF .... # | 959   | Check       |
| O3A -C15A -ZR5    | 1.555 1.555 13.655                               | 36.00 | Deg.        |
| PLAT779_ALERT_4_G | Suspect or Irrelevant (Bond) Angle in CIF .... # | 963   | Check       |
| O4A -C15A -ZR4    | 1.555 1.555 13.655                               | 29.70 | Deg.        |
| PLAT779_ALERT_4_G | Suspect or Irrelevant (Bond) Angle in CIF .... # | 965   | Check       |
| O4A -C15A -ZR6    | 1.555 1.555 14.445                               | 44.10 | Deg.        |
| PLAT779_ALERT_4_G | Suspect or Irrelevant (Bond) Angle in CIF .... # | 990   | Check       |
| ZR4 -O3B -ZR6     | 1.556 1.555 2.766                                | 19.40 | Deg.        |
| PLAT779_ALERT_4_G | Suspect or Irrelevant (Bond) Angle in CIF .... # | 1021  | Check       |
| C26B -C25B -C26B  | 1.555 1.555 10.556                               | 44.30 | Deg.        |
| PLAT779_ALERT_4_G | Suspect or Irrelevant (Bond) Angle in CIF .... # | 1024  | Check       |
| ZR5 -O3C -ZR3     | 6.656 1.555 13.656                               | 32.70 | Deg.        |
| PLAT779_ALERT_4_G | Suspect or Irrelevant (Bond) Angle in CIF .... # | 1026  | Check       |
| ZR5 -O3C -ZR5     | 6.656 1.555 15.646                               | 20.60 | Deg.        |
| PLAT779_ALERT_4_G | Suspect or Irrelevant (Bond) Angle in CIF .... # | 1029  | Check       |
| O13 -O3C -ZR5     | 13.656 1.555 15.646                              | 20.00 | Deg.        |
| PLAT779_ALERT_4_G | Suspect or Irrelevant (Bond) Angle in CIF .... # | 1030  | Check       |
| O13 -O3C -ZR5     | 13.656 1.555 6.656                               | 26.90 | Deg.        |
| PLAT779_ALERT_4_G | Suspect or Irrelevant (Bond) Angle in CIF .... # | 1035  | Check       |
| ZR4 -O4C -ZR6     | 6.656 1.555 5.446                                | 27.60 | Deg.        |
| PLAT779_ALERT_4_G | Suspect or Irrelevant (Bond) Angle in CIF .... # | 1040  | Check       |
| O3C -C15C -ZR5    | 1.555 1.555 6.656                                | 29.60 | Deg.        |
| PLAT779_ALERT_4_G | Suspect or Irrelevant (Bond) Angle in CIF .... # | 1062  | Check       |
| C25C -C24C -C25C  | 1.555 1.555 10.556                               | 43.90 | Deg.        |
| PLAT779_ALERT_4_G | Suspect or Irrelevant (Bond) Angle in CIF .... # | 1065  | Check       |
| C25C -C25C -C24C  | 10.556 1.555 10.556                              | 43.50 | Deg.        |
| PLAT780_ALERT_1_G | Coordinates do not Form a Properly Connected Set |       | Please Do ! |
| PLAT811_ALERT_5_G | No ADDSYM Analysis: Too Many Excluded Atoms .... |       | ! Info      |
| PLAT860_ALERT_3_G | Number of Least-Squares Restraints .....         | 921   | Note        |
| PLAT869_ALERT_4_G | ALERTS Related to the Use of SQUEEZE Suppressed  |       | ! Info      |

---

0 **ALERT level A** = Most likely a serious problem - resolve or explain  
 1 **ALERT level B** = A potentially serious problem, consider carefully  
 19 **ALERT level C** = Check. Ensure it is not caused by an omission or oversight  
 244 **ALERT level G** = General information/check it is not something unexpected

5 ALERT type 1 CIF construction/syntax error, inconsistent or missing data  
 24 ALERT type 2 Indicator that the structure model may be wrong or deficient  
 8 ALERT type 3 Indicator that the structure quality may be low  
 225 ALERT type 4 Improvement, methodology, query or suggestion  
 2 ALERT type 5 Informative message, check

---

It is advisable to attempt to resolve as many as possible of the alerts in all categories. Often the minor alerts point to easily fixed oversights, errors and omissions in your CIF or refinement strategy, so attention to these fine details can be worthwhile. In order to resolve some of the more serious problems it may be necessary to carry out additional measurements or structure refinements. However, the purpose of your study may justify the reported deviations and the more serious of these should normally be commented upon in the discussion or experimental section of a paper or in the "special\_details" fields of the CIF. checkCIF was carefully designed to identify outliers and unusual parameters, but every test has its limitations and alerts that are not important in a particular case may appear. Conversely, the absence of alerts does not guarantee there are no aspects of the results needing attention. It is up to the individual to critically assess their own results and, if necessary, seek expert advice.

### **Publication of your CIF in IUCr journals**

A basic structural check has been run on your CIF. These basic checks will be run on all CIFs submitted for publication in IUCr journals (*Acta Crystallographica*, *Journal of Applied Crystallography*, *Journal of Synchrotron Radiation*); however, if you intend to submit to *Acta Crystallographica Section C* or *E* or *IUCrData*, you should make sure that full publication checks are run on the final version of your CIF prior to submission.

### **Publication of your CIF in other journals**

Please refer to the *Notes for Authors* of the relevant journal for any special instructions relating to CIF submission.

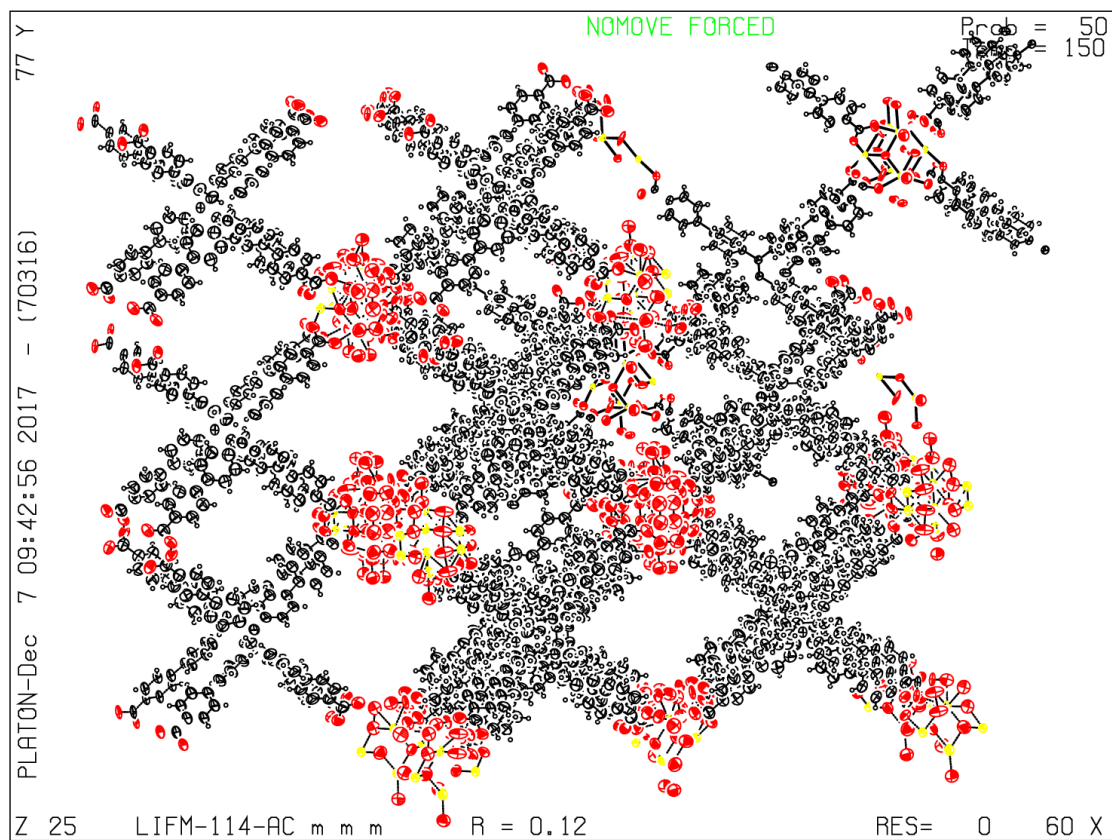

Supplement: Supplementary file 1 [file 16775912 › LIFM-114-Acetone-checkcif.pdf]
