# Supplementary material
Source: publisher figshare collection journal article supplement (https://acs.figshare.com/ndownloader/files/16775912)

# checkCIF/PLATON report

You have not supplied any structure factors. As a result the full set of tests cannot be run.

THIS REPORT IS FOR GUIDANCE ONLY. IF USED AS PART OF A REVIEW PROCEDURE FOR PUBLICATION, IT SHOULD NOT REPLACE THE EXPERTISE OF AN EXPERIENCED CRYSTALLOGRAPHIC REFEREE.

No syntax errors found.      CIF dictionary      Interpreting this report

## Datablock: LIFM-114-DCM

---

|                    |                                                                |                                 |
|--------------------|----------------------------------------------------------------|---------------------------------|
| Bond precision:    | C-C = 0.0090 A                                                 | Wavelength=1.54184              |
| Cell:              | a=21.4419(8)                                                   | b=42.3169(10)      c=17.9262(5) |
|                    | alpha=90                                                       | beta=90      gamma=90           |
| Temperature:       | 150 K                                                          |                                 |
|                    | Calculated                                                     | Reported                        |
| Volume             | 16265.4(8)                                                     | 16265.4(8)                      |
| Space group        | C m m m                                                        | C m m m                         |
| Hall group         | -C 2 2                                                         | -C 2 2                          |
| Moiety formula     | 2(C27 H16 O8 Zr1.50), C28 H16 O11 Zr3, 4(C6.50 H4 O), 2(O0.50) | C108 H64 O32 Zr6 [+ SOLVENT]    |
| Sum formula        | C108 H64 O32 Zr6 [+ solvent]                                   | C108 H64 O32 Zr6                |
| Mr                 | 2420.91                                                        | 2420.91                         |
| Dx,g cm-3          | 0.989                                                          | 0.989                           |
| Z                  | 4                                                              | 4                               |
| Mu (mm-1)          | 3.474                                                          | 3.474                           |
| F000               | 4832.0                                                         | 4832.0                          |
| F000'              | 4840.85                                                        |                                 |
| h,k,lmax           | 25,49,21                                                       | 24,48,20                        |
| Nref               | 7538                                                           | 7377                            |
| Tmin,Tmax          | 0.692,0.707                                                    | 0.571,1.000                     |
| Tmin'              | 0.336                                                          |                                 |
| Correction method= | # Reported T Limits: Tmin=0.571 Tmax=1.000                     |                                 |
| AbsCorr =          | MULTI-SCAN                                                     |                                 |
| Data completeness= | 0.979                                                          | Theta(max)= 65.353              |
| R(reflections)=    | 0.1295( 5708)                                                  | wR2(reflections)= 0.4043( 7377) |
| S =                | 1.692                                                          | Npar= 481                       |

---

The following ALERTS were generated. Each ALERT has the format

**test-name\_ALERT\_alert-type\_alert-level.**

Click on the hyperlinks for more details of the test.

---

### Alert level B

PLAT084\_ALERT\_3\_B High wR2 Value (i.e. > 0.25) ..... 0.40 Report

**Author Response: We have used Cu radiation, long exposure time and best crystal to obtain the best data set. The structure is highly disorder so the atom positions are difficult to determine.**

---

### Alert level C

DIFMN02\_ALERT\_2\_C The minimum difference density is < -0.1\*ZMAX\*0.75  
\_refine\_diff\_density\_min given = -4.000  
Test value = -3.000

DIFMN03\_ALERT\_1\_C The minimum difference density is < -0.1\*ZMAX\*0.75  
The relevant atom site should be identified.

THETM01\_ALERT\_3\_C The value of sine(theta\_max)/wavelength is less than 0.590  
Calculated sin(theta\_max)/wavelength = 0.5895

PLAT029\_ALERT\_3\_C \_diffrn\_measured\_fraction\_theta\_full value Low . 0.979 Why?

PLAT082\_ALERT\_2\_C High R1 Value ..... 0.13 Report

PLAT098\_ALERT\_2\_C Large Reported Min. (Negative) Residual Density -4.00 eA-3

PLAT213\_ALERT\_2\_C Atom O6 has ADP max/min Ratio .... 3.2 prolat

PLAT213\_ALERT\_2\_C Atom O8 has ADP max/min Ratio .... 3.2 prolat

PLAT241\_ALERT\_2\_C High 'MainMol' Ueq as Compared to Neighbors of 01 Check

PLAT241\_ALERT\_2\_C High 'MainMol' Ueq as Compared to Neighbors of 05 Check

PLAT241\_ALERT\_2\_C High 'MainMol' Ueq as Compared to Neighbors of 06 Check

PLAT241\_ALERT\_2\_C High 'MainMol' Ueq as Compared to Neighbors of C6 Check

PLAT242\_ALERT\_2\_C Low 'MainMol' Ueq as Compared to Neighbors of Zr1 Check

PLAT242\_ALERT\_2\_C Low 'MainMol' Ueq as Compared to Neighbors of Zr2 Check

PLAT242\_ALERT\_2\_C Low 'MainMol' Ueq as Compared to Neighbors of C5 Check

PLAT250\_ALERT\_2\_C Large U3/U1 Ratio for Average U(i,j) Tensor .... 2.6 Note

PLAT250\_ALERT\_2\_C Large U3/U1 Ratio for Average U(i,j) Tensor .... 3.2 Note

PLAT309\_ALERT\_2\_C Single Bonded Oxygen (C-O > 1.3 Ang) ..... 03A Check

PLAT342\_ALERT\_3\_C Low Bond Precision on C-C Bonds ..... 0.009 Ang.

PLAT410\_ALERT\_2\_C Short Intra H...H Contact H4 ..H13A . 1.98 Ang.

PLAT410\_ALERT\_2\_C Short Intra H...H Contact H6 ..H9A . 1.96 Ang.

---

### Alert level G

PLAT002\_ALERT\_2\_G Number of Distance or Angle Restraints on AtSite 32 Note

PLAT003\_ALERT\_2\_G Number of Uiso or Uij Restrained non-H Atoms ... 68 Report

PLAT004\_ALERT\_5\_G Polymeric Structure Found with Maximum Dimension 3 Info

PLAT012\_ALERT\_1\_G N.O.K. \_shelx\_res\_checksum Found in CIF ..... Please Check

PLAT042\_ALERT\_1\_G Calc. and Reported MoietyFormula Strings Differ Please Check

PLAT072\_ALERT\_2\_G SHELXL First Parameter in WGHT Unusually Large 0.20 Report

PLAT172\_ALERT\_4\_G The CIF-Embedded .res File Contains DFIX Records 19 Report

PLAT174\_ALERT\_4\_G The CIF-Embedded .res File Contains FLAT Records 1 Report

PLAT177\_ALERT\_4\_G The CIF-Embedded .res File Contains DELU Records 4 Report

PLAT178\_ALERT\_4\_G The CIF-Embedded .res File Contains SIMU Records 4 Report

PLAT186\_ALERT\_4\_G The CIF-Embedded .res File Contains ISOR Records 2 Report

PLAT300\_ALERT\_4\_G Atom Site Occupancy of C9 Constrained at 0.5 Check

PLAT300\_ALERT\_4\_G Atom Site Occupancy of C9A Constrained at 0.5 Check

PLAT300\_ALERT\_4\_G Atom Site Occupancy of C10 Constrained at 0.5 Check

PLAT300\_ALERT\_4\_G Atom Site Occupancy of C10A Constrained at 0.5 Check

[illegible]

|                   |                                                    |                |       |       |
|-------------------|----------------------------------------------------|----------------|-------|-------|
| PLAT300_ALERT_4_G | Atom Site Occupancy of H20A                        | Constrained at | 0.5   | Check |
| PLAT300_ALERT_4_G | Atom Site Occupancy of H21A                        | Constrained at | 0.5   | Check |
| PLAT300_ALERT_4_G | Atom Site Occupancy of H23A                        | Constrained at | 0.5   | Check |
| PLAT300_ALERT_4_G | Atom Site Occupancy of H24A                        | Constrained at | 0.5   | Check |
| PLAT300_ALERT_4_G | Atom Site Occupancy of H26A                        | Constrained at | 0.5   | Check |
| PLAT300_ALERT_4_G | Atom Site Occupancy of H27A                        | Constrained at | 0.5   | Check |
| PLAT300_ALERT_4_G | Atom Site Occupancy of O14A                        | Constrained at | 0.5   | Check |
| PLAT301_ALERT_3_G | Main Residue Disorder .....(Resd 1 )               |                | 20%   | Note  |
| PLAT301_ALERT_3_G | Main Residue Disorder .....(Resd 2 )               |                | 98%   | Note  |
| PLAT302_ALERT_4_G | Anion/Solvent/Minor-Residue Disorder (Resd 3 )     |                | 100%  | Note  |
| PLAT302_ALERT_4_G | Anion/Solvent/Minor-Residue Disorder (Resd 4 )     |                | 100%  | Note  |
| PLAT311_ALERT_2_G | Isolated Disordered Oxygen Atom (No H's ?) .....   |                | 014A  | Check |
| PLAT606_ALERT_4_G | VERY LARGE Solvent Accessible VOID(S) in Structure |                | !     | Info  |
| PLAT764_ALERT_4_G | Overcomplete CIF Bond List Detected (Rep/Expd) .   |                | 1.60  | Ratio |
| PLAT779_ALERT_4_G | Suspect or Irrelevant (Bond) Angle in CIF .... #   |                | 341   | Check |
|                   | ZR3 -O9 -ZR3 1.555 1.555 10.000                    |                | 35.90 | Deg.  |
| PLAT779_ALERT_4_G | Suspect or Irrelevant (Bond) Angle in CIF .... #   |                | 355   | Check |
|                   | O9 -O9 -ZR5 10.000 1.555 1.555                     |                | 34.90 | Deg.  |
| PLAT779_ALERT_4_G | Suspect or Irrelevant (Bond) Angle in CIF .... #   |                | 356   | Check |
|                   | O13 -O10 -ZR4 10.000 1.555 1.555                   |                | 8.40  | Deg.  |
| PLAT779_ALERT_4_G | Suspect or Irrelevant (Bond) Angle in CIF .... #   |                | 357   | Check |
|                   | ZR4 -O11 -ZR5 1.555 1.555 10.000                   |                | 37.40 | Deg.  |
| PLAT779_ALERT_4_G | Suspect or Irrelevant (Bond) Angle in CIF .... #   |                | 363   | Check |
|                   | ZR4 -O13 -ZR5 10.000 1.555 1.555                   |                | 14.40 | Deg.  |
| PLAT779_ALERT_4_G | Suspect or Irrelevant (Bond) Angle in CIF .... #   |                | 371   | Check |
|                   | ZR4 -O14 -ZR5 1.555 1.555 10.000                   |                | 37.00 | Deg.  |
| PLAT779_ALERT_4_G | Suspect or Irrelevant (Bond) Angle in CIF .... #   |                | 372   | Check |
|                   | ZR4 -O14 -ZR5 2.575 1.555 9.575                    |                | 37.00 | Deg.  |
| PLAT811_ALERT_5_G | No ADDSYM Analysis: Too Many Excluded Atoms ....   |                | !     | Info  |
| PLAT860_ALERT_3_G | Number of Least-Squares Restraints .....           |                | 643   | Note  |
| PLAT869_ALERT_4_G | ALERTS Related to the Use of SQUEEZE Suppressed    |                | !     | Info  |

---

0 **ALERT level A** = Most likely a serious problem - resolve or explain  
 1 **ALERT level B** = A potentially serious problem, consider carefully  
 21 **ALERT level C** = Check. Ensure it is not caused by an omission or oversight  
 101 **ALERT level G** = General information/check it is not something unexpected

3 **ALERT type 1** CIF construction/syntax error, inconsistent or missing data  
 21 **ALERT type 2** Indicator that the structure model may be wrong or deficient  
 7 **ALERT type 3** Indicator that the structure quality may be low  
 90 **ALERT type 4** Improvement, methodology, query or suggestion  
 2 **ALERT type 5** Informative message, check

---

It is advisable to attempt to resolve as many as possible of the alerts in all categories. Often the minor alerts point to easily fixed oversights, errors and omissions in your CIF or refinement strategy, so attention to these fine details can be worthwhile. In order to resolve some of the more serious problems it may be necessary to carry out additional measurements or structure refinements. However, the purpose of your study may justify the reported deviations and the more serious of these should normally be commented upon in the discussion or experimental section of a paper or in the "special\_details" fields of the CIF. checkCIF was carefully designed to identify outliers and unusual parameters, but every test has its limitations and alerts that are not important in a particular case may appear. Conversely, the absence of alerts does not guarantee there are no aspects of the results needing attention. It is up to the individual to critically assess their own results and, if necessary, seek expert advice.

### **Publication of your CIF in IUCr journals**

A basic structural check has been run on your CIF. These basic checks will be run on all CIFs submitted for publication in IUCr journals (*Acta Crystallographica*, *Journal of Applied Crystallography*, *Journal of Synchrotron Radiation*); however, if you intend to submit to *Acta Crystallographica Section C* or *E* or *IUCrData*, you should make sure that full publication checks are run on the final version of your CIF prior to submission.

### **Publication of your CIF in other journals**

Please refer to the *Notes for Authors* of the relevant journal for any special instructions relating to CIF submission.

---

**PLATON version of 09/11/2017; check.def file version of 08/11/2017**

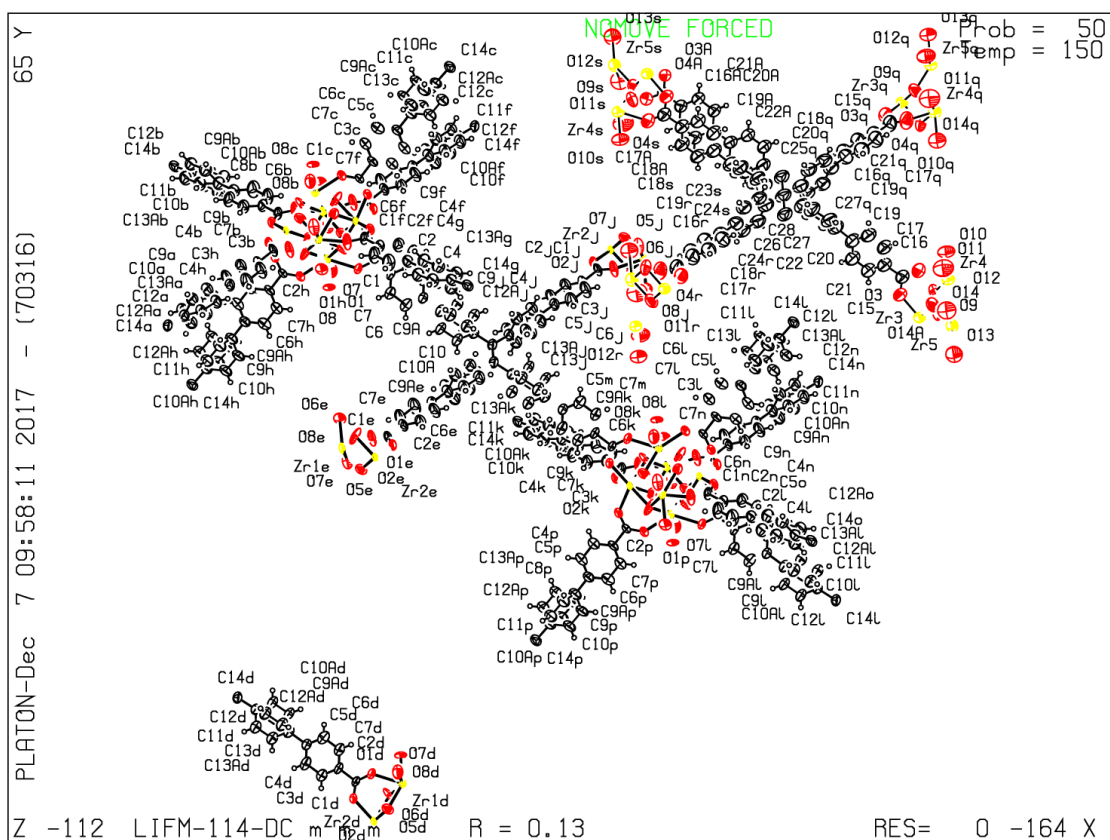

Supplement: Supplementary file 1 [file 16775912 › LIFM-114-DCM-checkcif.pdf]
