# Supplementary material
Source: publisher figshare collection journal article supplement (https://acs.figshare.com/ndownloader/files/16775912)

# checkCIF/PLATON report

You have not supplied any structure factors. As a result the full set of tests cannot be run.

THIS REPORT IS FOR GUIDANCE ONLY. IF USED AS PART OF A REVIEW PROCEDURE FOR PUBLICATION, IT SHOULD NOT REPLACE THE EXPERTISE OF AN EXPERIENCED CRYSTALLOGRAPHIC REFEREE.

No syntax errors found.      CIF dictionary      Interpreting this report

## Datablock: LIFM-114-Water

---

Bond precision:    C-C = 0.0079 Å                      Wavelength=1.54184

Cell:                      a=16.1063(7)              b=28.5501(8)              c=40.9518(9)  
                            alpha=90              beta=90              gamma=90  
Temperature:              150 K

|                        | Calculated                     | Reported                        |
|------------------------|--------------------------------|---------------------------------|
| Volume                 | 18831.1(11)                    | 18831.1(11)                     |
| Space group            | F m m m                        | F m m m                         |
| Hall group             | -F 2 2                         | -F 2 2                          |
| Moiety formula         | C54 H32 O16 Zr3 [+<br>solvent] | C108 H64 O32 Zr6 [+<br>SOLVENT] |
| Sum formula            | C54 H32 O16 Zr3 [+<br>solvent] | C108 H64 O32 Zr6                |
| Mr                     | 1210.46                        | 2420.91                         |
| Dx, g cm <sup>-3</sup> | 0.854                          | 0.854                           |
| Z                      | 8                              | 4                               |
| Mu (mm <sup>-1</sup> ) | 3.001                          | 3.001                           |
| F000                   | 4832.0                         | 4832.0                          |
| F000'                  | 4840.85                        |                                 |
| h,k,lmax               | 18,33,48                       | 18,33,47                        |
| Nref                   | 4346                           | 4244                            |
| Tmin,Tmax              | 0.732,0.741                    | 0.274,1.000                     |
| Tmin'                  | 0.387                          |                                 |

Correction method= # Reported T Limits: Tmin=0.274 Tmax=1.000  
AbsCorr = MULTI-SCAN

Data completeness= 0.977                      Theta(max)= 65.225

R(reflections)= 0.0730( 3845)              wR2(reflections)= 0.2035( 4244)

S = 1.042                      Npar= 187

---

The following ALERTS were generated. Each ALERT has the format

**test-name\_ALERT\_alert-type\_alert-level.**

Click on the hyperlinks for more details of the test.

### ● Alert level C

|                   |                                                                         |            |
|-------------------|-------------------------------------------------------------------------|------------|
| THETM01_ALERT_3_C | The value of $\sin(\theta_{\max})/\text{wavelength}$ is less than 0.590 |            |
|                   | Calculated $\sin(\theta_{\max})/\text{wavelength} = 0.5889$             |            |
| PLAT029_ALERT_3_C | _diffraction_measured_fraction_theta_full value Low .                   | 0.977 Why? |
| PLAT213_ALERT_2_C | Atom O3 has ADP max/min Ratio .....                                     | 3.4 prolat |
| PLAT213_ALERT_2_C | Atom O4 has ADP max/min Ratio .....                                     | 3.5 oblate |
| PLAT213_ALERT_2_C | Atom Cl has ADP max/min Ratio .....                                     | 3.1 prolat |
| PLAT241_ALERT_2_C | High 'MainMol' Ueq as Compared to Neighbors of                          | 01 Check   |
| PLAT241_ALERT_2_C | High 'MainMol' Ueq as Compared to Neighbors of                          | 03 Check   |
| PLAT241_ALERT_2_C | High 'MainMol' Ueq as Compared to Neighbors of                          | 04 Check   |
| PLAT242_ALERT_2_C | Low 'MainMol' Ueq as Compared to Neighbors of                           | Zr1 Check  |
| PLAT242_ALERT_2_C | Low 'MainMol' Ueq as Compared to Neighbors of                           | Zr2 Check  |
| PLAT250_ALERT_2_C | Large U3/U1 Ratio for Average U(i,j) Tensor ....                        | 3.6 Note   |

### ● Alert level G

|                   |                                                    |              |
|-------------------|----------------------------------------------------|--------------|
| PLAT002_ALERT_2_G | Number of Distance or Angle Restraints on AtSite   | 6 Note       |
| PLAT003_ALERT_2_G | Number of Uiso or Uij Restrained non-H Atoms ...   | 24 Report    |
| PLAT004_ALERT_5_G | Polymeric Structure Found with Maximum Dimension   | 3 Info       |
| PLAT012_ALERT_1_G | No _shelx_res_checksum Found in CIF .....          | Please Check |
| PLAT014_ALERT_1_G | No _shelx_fab_checksum Found in CIF .....          | Please Check |
| PLAT042_ALERT_1_G | Calc. and Reported MoietyFormula Strings Differ    | Please Check |
| PLAT045_ALERT_1_G | Calculated and Reported Z Differ by a Factor ...   | 2.00 Check   |
| PLAT072_ALERT_2_G | SHELXL First Parameter in WGHT Unusually Large     | 0.11 Report  |
| PLAT083_ALERT_2_G | SHELXL Second Parameter in WGHT Unusually Large    | 317.98 Why ? |
| PLAT300_ALERT_4_G | Atom Site Occupancy of C9 Constrained at           | 0.5 Check    |
| PLAT300_ALERT_4_G | Atom Site Occupancy of C9A Constrained at          | 0.5 Check    |
| PLAT300_ALERT_4_G | Atom Site Occupancy of C10 Constrained at          | 0.5 Check    |
| PLAT300_ALERT_4_G | Atom Site Occupancy of C10A Constrained at         | 0.5 Check    |
| PLAT300_ALERT_4_G | Atom Site Occupancy of C12 Constrained at          | 0.5 Check    |
| PLAT300_ALERT_4_G | Atom Site Occupancy of C12A Constrained at         | 0.5 Check    |
| PLAT300_ALERT_4_G | Atom Site Occupancy of C13 Constrained at          | 0.5 Check    |
| PLAT300_ALERT_4_G | Atom Site Occupancy of C13A Constrained at         | 0.5 Check    |
| PLAT300_ALERT_4_G | Atom Site Occupancy of H9 Constrained at           | 0.5 Check    |
| PLAT300_ALERT_4_G | Atom Site Occupancy of H9A Constrained at          | 0.5 Check    |
| PLAT300_ALERT_4_G | Atom Site Occupancy of H10 Constrained at          | 0.5 Check    |
| PLAT300_ALERT_4_G | Atom Site Occupancy of H10A Constrained at         | 0.5 Check    |
| PLAT300_ALERT_4_G | Atom Site Occupancy of H12 Constrained at          | 0.5 Check    |
| PLAT300_ALERT_4_G | Atom Site Occupancy of H12A Constrained at         | 0.5 Check    |
| PLAT300_ALERT_4_G | Atom Site Occupancy of H13 Constrained at          | 0.5 Check    |
| PLAT300_ALERT_4_G | Atom Site Occupancy of H13A Constrained at         | 0.5 Check    |
| PLAT301_ALERT_3_G | Main Residue Disorder .....(Resd 1 )               | 20% Note     |
| PLAT606_ALERT_4_G | VERY LARGE Solvent Accessible VOID(S) in Structure | ! Info       |
| PLAT764_ALERT_4_G | Overcomplete CIF Bond List Detected (Rep/Expd) .   | 1.25 Ratio   |
| PLAT860_ALERT_3_G | Number of Least-Squares Restraints .....           | 284 Note     |
| PLAT869_ALERT_4_G | ALERTS Related to the Use of SQUEEZE Suppressed    | ! Info       |

0 **ALERT level A** = Most likely a serious problem - resolve or explain

0 **ALERT level B** = A potentially serious problem, consider carefully

11 **ALERT level C** = Check. Ensure it is not caused by an omission or oversight

30 **ALERT level G** = General information/check it is not something unexpected

4 ALERT type 1 CIF construction/syntax error, inconsistent or missing data

13 ALERT type 2 Indicator that the structure model may be wrong or deficient  
4 ALERT type 3 Indicator that the structure quality may be low  
19 ALERT type 4 Improvement, methodology, query or suggestion  
1 ALERT type 5 Informative message, check

---

---

It is advisable to attempt to resolve as many as possible of the alerts in all categories. Often the minor alerts point to easily fixed oversights, errors and omissions in your CIF or refinement strategy, so attention to these fine details can be worthwhile. In order to resolve some of the more serious problems it may be necessary to carry out additional measurements or structure refinements. However, the purpose of your study may justify the reported deviations and the more serious of these should normally be commented upon in the discussion or experimental section of a paper or in the "special\_details" fields of the CIF. checkCIF was carefully designed to identify outliers and unusual parameters, but every test has its limitations and alerts that are not important in a particular case may appear. Conversely, the absence of alerts does not guarantee there are no aspects of the results needing attention. It is up to the individual to critically assess their own results and, if necessary, seek expert advice.

### **Publication of your CIF in IUCr journals**

A basic structural check has been run on your CIF. These basic checks will be run on all CIFs submitted for publication in IUCr journals (*Acta Crystallographica*, *Journal of Applied Crystallography*, *Journal of Synchrotron Radiation*); however, if you intend to submit to *Acta Crystallographica Section C* or *E* or *IUCrData*, you should make sure that full publication checks are run on the final version of your CIF prior to submission.

### **Publication of your CIF in other journals**

Please refer to the *Notes for Authors* of the relevant journal for any special instructions relating to CIF submission.

---

**PLATON version of 09/11/2017; check.def file version of 08/11/2017**

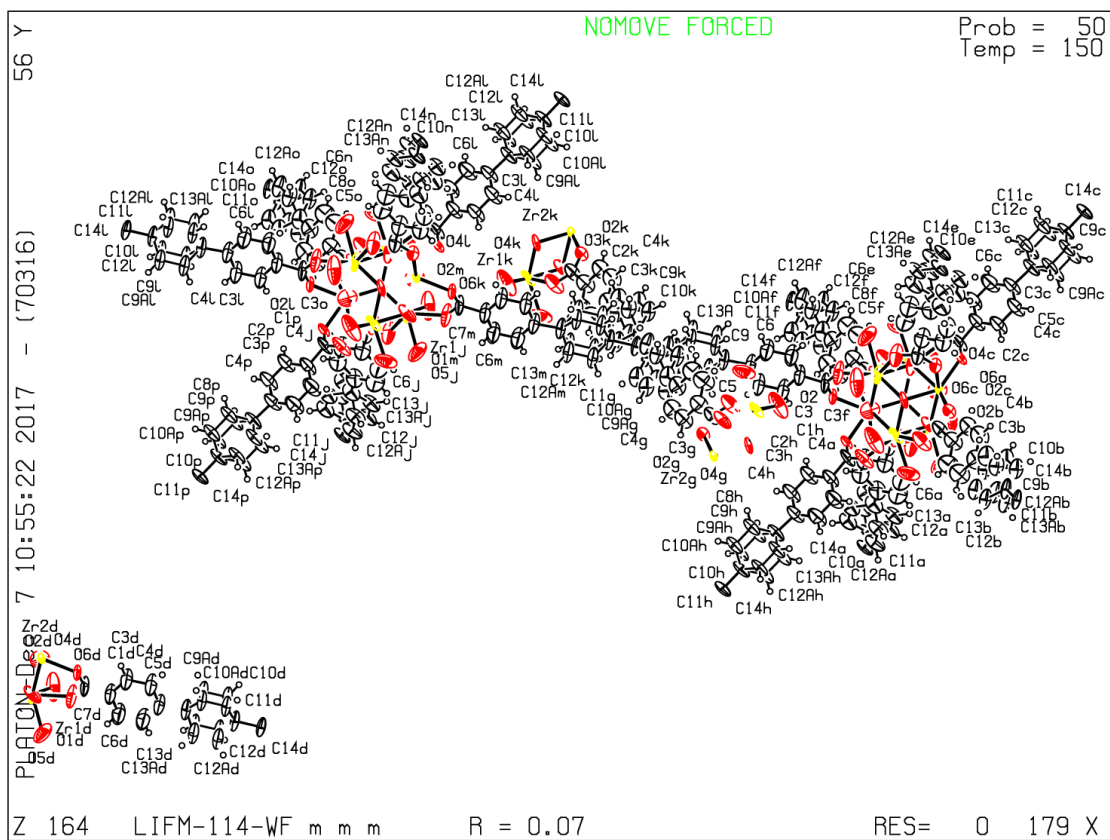

Supplement: Supplementary file 1 [file 16775912 › LIFM-114-Water-checkcif.pdf]
