# Supplementary material
Source: publisher figshare collection journal article supplement (https://acs.figshare.com/ndownloader/files/16775912)
Supplement: Supplementary file 1 [file 16775912]

Archive with 22 entries (22 files):
- LIFM-114-40C-checkcif.pdf
- LIFM-114-40C.cif
- LIFM-114-60C-checkcif.pdf
- LIFM-114-60C.cif
- LIFM-114-80-checkcif.pdf
- LIFM-114-80C.cif
- LIFM-114-Acetone-checkcif.pdf
- LIFM-114-Acetone.cif
- LIFM-114-DCM-checkcif.pdf
- LIFM-114-DCM-solved.cif
- LIFM-114-Ethanol-checkcif.pdf
- LIFM-114-Ethanol-solved.cif
- LIFM-114-Ether-checkcif.pdf
- LIFM-114-Ether-solved.cif
- LIFM-114-Methanol-checkcif.pdf
- LIFM-114-Methanol-solved.cif
- LIFM-114-Toluene-checkcif.pdf
- LIFM-114-Toluene-solved.cif
- LIFM-114-Water-checkcif.pdf
- LIFM-114-Water-solved.cif
- LIFM-114-checkcif.pdf
- LIFM-114-solved.cif
