# Supplementary material
Source: publisher figshare collection journal article supplement (https://acs.figshare.com/ndownloader/files/16775912)
Supplement: Supplementary file 1 [file 16775912 › LIFM-114-40C.cif]

data_LIFM-114-40C
_audit_creation_date               2018-06-29
_audit_creation_method
;
Olex2 1.2
(compiled 2018.05.29 svn.r3508 for OlexSys, GUI svn.r5506)
;
_shelx_SHELXL_version_number       '2014/7'
_audit_contact_author_address      ?
_audit_contact_author_email        ?
_audit_contact_author_name         ''
_audit_contact_author_phone        ?
_publ_contact_author_id_orcid      ?
_publ_section_references
;
Bourhis, L.J., Dolomanov, O.V., Gildea, R.J., Howard, J.A.K., Puschmann, H.
 (2015). Acta Cryst. A71, 59-75.

Dolomanov, O.V., Bourhis, L.J., Gildea, R.J, Howard, J.A.K. & Puschmann, H.
 (2009), J. Appl. Cryst. 42, 339-341.

Sheldrick, G.M. (2015). Acta Cryst. C71, 3-8.
;
_chemical_name_common              LIFM-114-40C
_chemical_name_systematic          ?
_chemical_formula_moiety           '0.5(C216 H128 O64 Zr12)'
_chemical_formula_sum              'C108 H64 O32 Zr6'
_chemical_formula_weight           2420.91
_chemical_melting_point            ?
_chemical_oxdiff_formula           CHOZr
_chemical_oxdiff_usercomment       114-40
loop_
  _atom_type_symbol
  _atom_type_description
  _atom_type_scat_dispersion_real
  _atom_type_scat_dispersion_imag
  _atom_type_scat_source
 'C' 'C' 0.0181 0.0091 'International Tables Vol C Tables 4.2.6.8 and 6.1.1.4'
 'H' 'H' 0.0000 0.0000 'International Tables Vol C Tables 4.2.6.8 and 6.1.1.4'
 'O' 'O' 0.0492 0.0322 'International Tables Vol C Tables 4.2.6.8 and 6.1.1.4'
 'Zr' 'Zr' -0.1862 2.2449
 'International Tables Vol C Tables 4.2.6.8 and 6.1.1.4'

_shelx_space_group_comment
;
The symmetry employed for this shelxl refinement is uniquely defined
by the following loop, which should always be used as a source of
symmetry information in preference to the above space-group names.
They are only intended as comments.
;
_space_group_crystal_system        'orthorhombic'
_space_group_IT_number             65
_space_group_name_H-M_alt          'C m m m'
_space_group_name_Hall             '-C 2 2'
loop_
  _space_group_symop_operation_xyz
 'x, y, z'
 '-x, -y, z'
 'x, -y, -z'
 '-x, y, -z'
 'x+1/2, y+1/2, z'
 '-x+1/2, -y+1/2, z'
 'x+1/2, -y+1/2, -z'
 '-x+1/2, y+1/2, -z'
 '-x, -y, -z'
 'x, y, -z'
 '-x, y, z'
 'x, -y, z'
 '-x+1/2, -y+1/2, -z'
 'x+1/2, y+1/2, -z'
 '-x+1/2, y+1/2, z'
 'x+1/2, -y+1/2, z'

_cell_length_a                     25.7916(15)
_cell_length_b                     41.7841(11)
_cell_length_c                     16.8545(4)
_cell_angle_alpha                  90
_cell_angle_beta                   90
_cell_angle_gamma                  90
_cell_volume                       18163.7(12)
_cell_formula_units_Z              4
_cell_measurement_reflns_used      8857
_cell_measurement_temperature      149.99(10)
_cell_measurement_theta_max        65.6760
_cell_measurement_theta_min        4.8000
_shelx_estimated_absorpt_T_max     ?
_shelx_estimated_absorpt_T_min     ?
_exptl_absorpt_coefficient_mu      3.111
_exptl_absorpt_correction_T_max    1.00000
_exptl_absorpt_correction_T_min    0.30882
_exptl_absorpt_correction_type     multi-scan
_exptl_absorpt_process_details
;
CrysAlisPro 1.171.38.43 (Rigaku Oxford Diffraction, 2015)
Empirical absorption correction using spherical harmonics,
 implemented in SCALE3 ABSPACK scaling algorithm.
;
_exptl_absorpt_special_details     ?
_exptl_crystal_colour              'Light Green'
_exptl_crystal_density_diffrn      0.885
_exptl_crystal_density_meas        ?
_exptl_crystal_density_method      ?
_exptl_crystal_description         Rod
_exptl_crystal_F_000               4832
_exptl_crystal_size_max            0.3
_exptl_crystal_size_mid            0.1
_exptl_crystal_size_min            0.1
_exptl_transmission_factor_max     ?
_exptl_transmission_factor_min     ?
_diffrn_reflns_av_R_equivalents    0.0303
_diffrn_reflns_av_unetI/netI       0.0343
_diffrn_reflns_Laue_measured_fraction_full  0.978
_diffrn_reflns_Laue_measured_fraction_max  0.978
_diffrn_reflns_limit_h_max         30
_diffrn_reflns_limit_h_min         -28
_diffrn_reflns_limit_k_max         46
_diffrn_reflns_limit_k_min         -48
_diffrn_reflns_limit_l_max         17
_diffrn_reflns_limit_l_min         -19
_diffrn_reflns_number              19342
_diffrn_reflns_point_group_measured_fraction_full  0.978
_diffrn_reflns_point_group_measured_fraction_max  0.978
_diffrn_reflns_theta_full          65.589
_diffrn_reflns_theta_max           65.589
_diffrn_reflns_theta_min           3.369
_diffrn_ambient_environment        N~2~
_diffrn_ambient_temperature        149.99(10)
_diffrn_detector                   'CCD plate'
_diffrn_detector_area_resol_mean   5.2913
_diffrn_detector_type              AtlasS2
_diffrn_measured_fraction_theta_full  0.978
_diffrn_measured_fraction_theta_max  0.978
_diffrn_measurement_details
;
List of Runs (angles in degrees, time in seconds):

  # Type    Start    End  Width  t~exp~   \w     \q     \k     \f   Frames
--------------------------------------------------------------------------
  1  \w    -35.00  24.00   1.00   20.00    --   -1.62  19.00 120.00   59
  2  \w     35.00  68.00   1.00   20.00    --   -1.62  19.00 120.00   33
  3  \w     95.00 155.00   1.00   30.00    --   88.73 125.00 -30.00   60
  4  \w     96.00 158.00   1.00   30.00    --   88.73 125.00  90.00   62
  5  \w     94.00 145.00   1.00   30.00    --   88.73 125.00 150.00   51
  6  \w     70.00 149.00   1.00   30.00    --   88.73  77.00 -90.00   79
;
_diffrn_measurement_device         'four-circle diffractometer'
_diffrn_measurement_device_type    'SuperNova, Dual, Cu at zero, AtlasS2'
_diffrn_measurement_method         '\w scans'
_diffrn_orient_matrix_type        
 'CrysAlisPro convention (1999,Acta A55,543-557)'
_diffrn_orient_matrix_UB_11        -0.0232872000
_diffrn_orient_matrix_UB_12        0.0163625000
_diffrn_orient_matrix_UB_13        -0.0737937000
_diffrn_orient_matrix_UB_21        0.0510939000
_diffrn_orient_matrix_UB_22        0.0184410000
_diffrn_orient_matrix_UB_23        -0.0125592000
_diffrn_orient_matrix_UB_31        0.0204340000
_diffrn_orient_matrix_UB_32        -0.0273717000
_diffrn_orient_matrix_UB_33        -0.0524366000
_diffrn_radiation_monochromator    mirror
_diffrn_radiation_probe            x-ray
_diffrn_radiation_type             CuK\a
_diffrn_radiation_wavelength       1.54178
_diffrn_source                     'micro-focus sealed X-ray tube'
_diffrn_source_type                'SuperNova (Cu) X-ray Source'
_reflns_Friedel_coverage           0.000
_reflns_Friedel_fraction_full      .
_reflns_Friedel_fraction_max       .
_reflns_number_gt                  6980
_reflns_number_total               8272
_reflns_odcompleteness_completeness  99.77
_reflns_odcompleteness_iscentric   1
_reflns_odcompleteness_theta       61.08
_reflns_special_details
;
 Reflections were merged by SHELXL according to the crystal
 class for the calculation of statistics and refinement.
 
 Structure factors included contributions from the .fab file.
 
 _reflns_Friedel_fraction is defined as the number of unique
 Friedel pairs measured divided by the number that would be
 possible theoretically, ignoring centric projections and
 systematic absences.
;
_reflns_threshold_expression       'I > 2\s(I)'
_computing_cell_refinement         'CrysAlisPro 1.171.38.43 (Rigaku OD, 2015)'
_computing_data_collection         'CrysAlisPro 1.171.38.43 (Rigaku OD, 2015)'
_computing_data_reduction          'CrysAlisPro 1.171.38.43 (Rigaku OD, 2015)'
_computing_molecular_graphics      'Olex2 (Dolomanov et al., 2009)'
_computing_publication_material    'Olex2 (Dolomanov et al., 2009)'
_computing_structure_refinement    'ShelXL (Sheldrick, 2015)'
_computing_structure_solution      'olex2.solve (Bourhis et al., 2015)'
_refine_diff_density_max           1.529
_refine_diff_density_min           -3.942
_refine_diff_density_rms           0.187
_refine_ls_extinction_coef         .
_refine_ls_extinction_method       none
_refine_ls_goodness_of_fit_ref     1.078
_refine_ls_hydrogen_treatment      constr
_refine_ls_matrix_type             full
_refine_ls_number_parameters       543
_refine_ls_number_reflns           8272
_refine_ls_number_restraints       728
_refine_ls_R_factor_all            0.1232
_refine_ls_R_factor_gt             0.1139
_refine_ls_restrained_S_all        2.870
_refine_ls_shift/su_max            0.000
_refine_ls_shift/su_mean           0.000
_refine_ls_structure_factor_coef   Fsqd
_refine_ls_weighting_details      
 'w=1/[\s^2^(Fo^2^)+(0.2000P)^2^+200.0000P] where P=(Fo^2^+2Fc^2^)/3'
_refine_ls_weighting_scheme        calc
_refine_ls_wR_factor_gt            0.3225
_refine_ls_wR_factor_ref           0.3333
_refine_special_details            ?
_olex2_refinement_description
;
1. Fixed Uiso
 At 1.2 times of:
  All C(H) groups
2. Restrained distances
 C8-C9 = C9-C10 = C10-C11 = C11-C12
 1.39 with sigma of 0.01
 C12-C13 = C13-C8
 1.39 with sigma of 0.01
 C8-C10 = C9-C11 = C10-C12
 2.4 with sigma of 0.01
 C11-C13 = C12-C8 = C13-C9
 2.4 with sigma of 0.01
 C8-C11 = C9-C12 = C10-C13
 2.8 with sigma of 0.01
 C8-C9A = C9A-C10A = C10A-C11
 1.39 with sigma of 0.01
 C11-C12A = C12A-C13A = C13A-C8
 1.39 with sigma of 0.01
 C8-C10A = C9A-C11 = C10A-C12A
 2.4 with sigma of 0.01
 C11-C13A = C12A-C8 = C13A-C9A
 2.4 with sigma of 0.01
 C9A-C12A = C10A-C13A
 2.8 with sigma of 0.01
 C15-C16 = C19-C22 = C41_$1-C25
 1.5 with sigma of 0.01
 C28-C29 = C32-C35 = C38-C41
 1.5 with sigma of 0.01
 C16-C17 = C17-C18 = C18-C19
 1.39 with sigma of 0.01
 C19-C20 = C20-C21 = C21-C16
 1.39 with sigma of 0.01
 C16-C18 = C17-C19 = C18-C20
 2.4 with sigma of 0.01
 C19-C21 = C20-C16 = C21-C17
 2.4 with sigma of 0.01
 C16-C19 = C17-C20 = C18-C21
 2.8 with sigma of 0.01
 C22-C23 = C23-C24 = C24-C25
 1.39 with sigma of 0.01
 C25-C26 = C26-C27 = C27-C22
 1.39 with sigma of 0.01
 C22-C24 = C23-C25 = C24-C26
 2.4 with sigma of 0.01
 C25-C27 = C26-C22 = C27-C23
 2.4 with sigma of 0.01
 C22-C25 = C23-C26 = C24-C27
 2.8 with sigma of 0.01
 C29-C30 = C30-C31 = C31-C32
 1.39 with sigma of 0.01
 C32-C33 = C33-C34 = C34-C29
 1.39 with sigma of 0.01
 C29-C31 = C30-C32 = C31-C33
 2.4 with sigma of 0.01
 C32-C34 = C33-C29 = C34-C30
 2.4 with sigma of 0.01
 C29-C32 = C30-C33 = C31-C34
 2.8 with sigma of 0.01
 C35-C36 = C36-C37 = C37-C38
 1.39 with sigma of 0.01
 C38-C39 = C39-C40 = C40-C35
 1.39 with sigma of 0.01
 C35-C37 = C36-C38 = C37-C39
 2.4 with sigma of 0.01
 C38-C40 = C39-C35 = C40-C36
 2.4 with sigma of 0.01
 C35-C38 = C36-C39 = C37-C40
 2.8 with sigma of 0.01
 C15-O3 = C15-O4 = C28-O5 = C28-O6
 1.28 with sigma of 0.01
 C26-H26
 0.95 with sigma of 0.001
 H26-C27 \\sim H26-C25
 with sigma of 0.01
3. Restrained planarity
 C8, C9, C10, C11, C12, C13
 with sigma of 0.01
 C8, C9A, C10A, C12A, C13A, C11
 with sigma of 0.01
 C16, C17, C18, C19, C20, C21
 with sigma of 0.01
 C22, C23, C24, C25, C26, C27, H26
 with sigma of 0.01
 C29, C30, C31, C32, C33, C34
 with sigma of 0.01
 C35, C36, C37, C38, C39, C40
 with sigma of 0.01
 Zr3, Zr4, O3, O4
 with sigma of 0.01
 O5, O6, C28, Zr4, Zr5
 with sigma of 0.01
4. Rigid bond restraints
 C15, C16, C17, C18, C19, C20, C21, C22, C23, C24, C25, C26, C27, C28, C29,
 C30, C31, C32, C33, C34, C35, C36, C37, C38, C39, C40, C41, O3, O4, O5, O6
 with sigma for 1-2 distances of 0.01 and sigma for 1-3 distances of 0.01
 C1, C2, C3, C4, C5, C6, C7, C8, C9, C10, C11, C12, C13, C14, C9A, C10A, C12A,
 C13A
 with sigma for 1-2 distances of 0.01 and sigma for 1-3 distances of 0.01
5. Uiso/Uaniso restraints and constraints
C15 \\sim C16 \\sim C17 \\sim C18 \\sim C19 \\sim C20 \\sim C21 \\sim C22 \\sim
C23 \\sim C24 \\sim C25 \\sim C26 \\sim C27 \\sim C28 \\sim C29 \\sim C30 \\sim
C31 \\sim C32 \\sim C33 \\sim C34 \\sim C35 \\sim C36 \\sim C37 \\sim C38 \\sim
C39 \\sim C40 \\sim C41 \\sim O3 \\sim O4 \\sim O5 \\sim O6: within 2A with
sigma of 0.01 and sigma for terminal atoms of 0.02
C1 \\sim C2 \\sim C3 \\sim C4 \\sim C5 \\sim C6 \\sim C7 \\sim C8 \\sim C9
\\sim C10 \\sim C11 \\sim C12 \\sim C13 \\sim C14 \\sim C9A \\sim C10A \\sim
C12A \\sim C13A: within 2A with sigma of 0.01 and sigma for terminal atoms of
0.02
Uanis(C24) \\sim Ueq, Uanis(C36) \\sim Ueq: with sigma of 0.01 and sigma for
terminal atoms of 0.02
6. Others
 Fixed Sof: Zr3(0.125) Zr4(0.5) Zr5(0.125) O3(0.5) O4(0.5) O6(0.5) O7(0.5)
 O12(0.5) O14(0.25) O15(0.25) O16(0.25) O17(0.25) C9(0.5) H9(0.5) C10(0.5)
 H10(0.5) C12(0.5) H12(0.5) C13(0.5) H13(0.5) C15(0.5) C16(0.5) C17(0.5)
 H17(0.5) C18(0.5) H18(0.5) C19(0.5) C20(0.5) H20(0.5) C21(0.5) H21(0.5)
 C22(0.5) C23(0.5) H23(0.5) C24(0.5) H24(0.5) C25(0.5) H26(0.5) C27(0.5)
 H27(0.5) C28(0.5) C29(0.5) C30(0.5) H30(0.5) C31(0.5) H31(0.5) C32(0.5)
 C33(0.5) H33(0.5) C34(0.5) H34(0.5) C35(0.5) C36(0.5) H36(0.5) C37(0.5)
 H37(0.5) C38(0.5) C39(0.5) H39(0.5) C40(0.5) H40(0.5) C41(0.5) C9A(0.5)
 H9A(0.5) C10A(0.5) H10A(0.5) C12A(0.5) H12A(0.5) C13A(0.5) H13A(0.5)
7.a Riding coordinates:
 C27(H27)
7.b Rotating group:
 C26(H26)
7.c Aromatic/amide H refined with riding coordinates:
 C3(H3), C4(H4), C6(H6), C7(H7), C9(H9), C10(H10), C12(H12), C13(H13),
 C17(H17), C18(H18), C20(H20), C21(H21), C23(H23), C24(H24), C30(H30), C31(H31),
  C33(H33), C34(H34), C36(H36), C37(H37), C39(H39), C40(H40), C9A(H9A),
 C10A(H10A), C12A(H12A), C13A(H13A)
;
_atom_sites_solution_hydrogens     mixed
_atom_sites_solution_primary       iterative
_atom_sites_solution_secondary     ?
loop_
  _atom_site_label
  _atom_site_type_symbol
  _atom_site_fract_x
  _atom_site_fract_y
  _atom_site_fract_z
  _atom_site_U_iso_or_equiv
  _atom_site_adp_type
  _atom_site_occupancy
  _atom_site_site_symmetry_order
  _atom_site_calc_flag
  _atom_site_refinement_flags_posn
  _atom_site_refinement_flags_adp
  _atom_site_refinement_flags_occupancy
  _atom_site_disorder_assembly
  _atom_site_disorder_group
 Zr1 Zr 0.0000 0.05864(2) 0.0000 0.0211(3) Uani 1 4 d S T P . .
 Zr2 Zr 0.06850(3) 0.0000 0.10486(4) 0.0289(3) Uani 1 2 d S T P . .
 Zr3 Zr 0.5000 0.10076(6) 0.5000 0.0595(8) Uani 0.5 4 d S T P A 1
 Zr4 Zr 0.43185(7) 0.04229(4) 0.39490(12) 0.0701(6) Uani 0.5 1 d . . . A 1
 Zr5 Zr 0.5000 -0.01619(7) 0.5000 0.0647(8) Uani 0.5 4 d S T P A 1
 O1 O 0.04997(17) 0.08573(10) 0.0783(2) 0.0342(10) Uani 1 1 d . . . . .
 O2 O 0.0954(2) 0.04837(10) 0.1472(3) 0.0564(15) Uani 1 1 d . . . . .
 O3 O 0.4007(6) 0.0904(3) 0.3569(9) 0.112(3) Uani 0.5 1 d D U . A 1
 O4 O 0.4435(5) 0.1276(2) 0.4229(8) 0.080(3) Uani 0.5 1 d D U . A 1
 O5 O 0.4096(6) 0.0000 0.3446(10) 0.145(4) Uani 1 2 d DS TU P . .
 O6 O 0.4476(5) 0.0369(6) 0.4208(8) 0.163(6) Uani 0.5 1 d D U . A 2
 O7 O 0.3461(6) 0.0391(5) 0.4042(16) 0.148(9) Uani 0.5 1 d . . . A 1
 O8 O 0.1538(3) 0.0000 0.0996(6) 0.066(2) Uani 1 2 d S T P . .
 O9 O 0.0647(4) 0.0000 0.2355(4) 0.065(3) Uani 1 2 d S T P . .
 O10 O 0.0684(4) 0.02857(18) 0.0000 0.074(3) Uani 1 2 d S T P . .
 O11 O 0.0000 0.02785(18) 0.1045(6) 0.073(3) Uani 1 2 d S T P . .
 O12 O 0.4384(8) 0.0447(4) 0.2666(9) 0.113(6) Uani 0.5 1 d . . . A 1
 O14 O 0.5000 0.0735(4) 0.3804(14) 0.080(6) Uani 0.5 2 d S T P . .
 O15 O 0.4407(7) 0.0671(4) 0.5000 0.071(5) Uani 0.5 2 d S T P . .
 O16 O 0.5000 0.0168(4) 0.4083(11) 0.066(4) Uani 0.5 2 d S T P . .
 O17 O 0.4204(7) 0.0100(4) 0.5000 0.079(5) Uani 0.5 2 d S T P . .
 C1 C 0.0846(3) 0.07615(14) 0.1320(4) 0.0415(16) Uani 1 1 d . U . . .
 C2 C 0.1075(4) 0.10247(16) 0.1807(5) 0.0584(18) Uani 1 1 d . U . . .
 C3 C 0.0920(5) 0.13360(19) 0.1761(6) 0.080(2) Uani 1 1 d . U . . .
 H3 H 0.0645 0.1393 0.1415 0.096 Uiso 1 1 calc R . . . .
 C4 C 0.1157(5) 0.1567(2) 0.2205(6) 0.087(2) Uani 1 1 d . U . . .
 H4 H 0.1045 0.1783 0.2149 0.104 Uiso 1 1 calc R . . . .
 C5 C 0.1539(4) 0.15019(18) 0.2717(5) 0.070(2) Uani 1 1 d . U . . .
 C6 C 0.1681(5) 0.1196(2) 0.2772(6) 0.088(3) Uani 1 1 d . U . . .
 H6 H 0.1940 0.1140 0.3148 0.106 Uiso 1 1 calc R . . . .
 C7 C 0.1475(4) 0.0959(2) 0.2321(6) 0.084(2) Uani 1 1 d . U . . .
 H7 H 0.1608 0.0747 0.2359 0.100 Uiso 1 1 calc R . . . .
 C8 C 0.1781(3) 0.17664(14) 0.3209(4) 0.0696(19) Uani 1 1 d D U . . .
 C9 C 0.1479(3) 0.1991(2) 0.3608(6) 0.078(3) Uani 0.5 1 d D U . B 1
 H9 H 0.1111 0.1982 0.3572 0.093 Uiso 0.5 1 calc R . . B 1
 C10 C 0.1717(4) 0.2228(2) 0.4061(6) 0.077(3) Uani 0.5 1 d D U . B 1
 H10 H 0.1511 0.2382 0.4332 0.092 Uiso 0.5 1 calc R . . B 1
 C11 C 0.2251(3) 0.22415(14) 0.4117(4) 0.0688(19) Uani 1 1 d D U . . .
 C12 C 0.2555(3) 0.2017(3) 0.3715(7) 0.082(3) Uani 0.5 1 d D U . B 1
 H12 H 0.2922 0.2027 0.3750 0.098 Uiso 0.5 1 calc R . . B 1
 C13 C 0.2318(4) 0.1780(2) 0.3263(7) 0.081(3) Uani 0.5 1 d D U . B 1
 H13 H 0.2524 0.1626 0.2991 0.097 Uiso 0.5 1 calc R . . B 1
 C14 C 0.2500 0.2500 0.4604(6) 0.068(3) Uani 1 2 d S TU P B .
 C15 C 0.4161(9) 0.1193(3) 0.3650(13) 0.106(3) Uani 0.5 1 d D U . A 1
 C16 C 0.3883(7) 0.1451(3) 0.3211(11) 0.112(3) Uani 0.5 1 d D U . A 1
 C17 C 0.4071(6) 0.1763(4) 0.3230(11) 0.114(4) Uani 0.5 1 d D U . A 1
 H17 H 0.4355 0.1816 0.3564 0.137 Uiso 0.5 1 calc R . . A 1
 C18 C 0.3844(7) 0.1997(3) 0.2760(12) 0.117(4) Uani 0.5 1 d D U . A 1
 H18 H 0.3972 0.2210 0.2773 0.140 Uiso 0.5 1 calc R . . A 1
 C19 C 0.3427(7) 0.1919(3) 0.2270(11) 0.121(3) Uani 0.5 1 d D U . A 1
 C20 C 0.3238(7) 0.1609(4) 0.2253(11) 0.120(3) Uani 0.5 1 d D U . A 1
 H20 H 0.2952 0.1556 0.1921 0.144 Uiso 0.5 1 calc R . . A 1
 C21 C 0.3468(7) 0.1373(3) 0.2723(12) 0.117(3) Uani 0.5 1 d D U . A 1
 H21 H 0.3342 0.1159 0.2708 0.141 Uiso 0.5 1 calc R . . A 1
 C22 C 0.3183(7) 0.2190(4) 0.1823(11) 0.135(4) Uani 0.5 1 d D U . A 1
 C23 C 0.3547(4) 0.2407(4) 0.1521(12) 0.153(5) Uani 0.5 1 d D U . A 1
 H23 H 0.3906 0.2376 0.1620 0.184 Uiso 0.5 1 calc R . . A 1
 C24 C 0.3382(4) 0.2667(4) 0.1077(12) 0.159(5) Uani 0.5 1 d D U . A 1
 H24 H 0.3629 0.2815 0.0873 0.191 Uiso 0.5 1 calc R . . A 1
 C25 C 0.2855(5) 0.2713(3) 0.0930(11) 0.162(5) Uani 0.5 1 d D U . A 1
 C26 C 0.2500 0.2500 0.1229(12) 0.159(5) Uani 1 2 d DS TU P A 1
 H26 H 0.2228 0.2520 0.1159 0.191 Uiso 0.5 1 d DGR . . A 1
 C27 C 0.2660(6) 0.2235(3) 0.1678(12) 0.150(5) Uani 0.5 1 d D U . . .
 H27 H 0.2412 0.2087 0.1877 0.180 Uiso 0.5 1 d R . . A .
 C28 C 0.4150(5) 0.0302(2) 0.3617(8) 0.145(4) Uani 0.5 1 d D U . A 2
 C29 C 0.3947(8) 0.0598(4) 0.3178(12) 0.127(4) Uani 0.5 1 d D U . A 2
 C30 C 0.4117(7) 0.0911(4) 0.3285(11) 0.122(3) Uani 0.5 1 d D U . A 2
 H30 H 0.4378 0.0956 0.3667 0.146 Uiso 0.5 1 calc R . . A 2
 C31 C 0.3908(8) 0.1159(3) 0.2835(12) 0.118(3) Uani 0.5 1 d D U . A 2
 H31 H 0.4026 0.1372 0.2912 0.142 Uiso 0.5 1 calc R . . A 2
 C32 C 0.3527(8) 0.1094(3) 0.2273(11) 0.121(3) Uani 0.5 1 d D U . A 2
 C33 C 0.3353(7) 0.0783(4) 0.2164(11) 0.128(4) Uani 0.5 1 d D U . A 2
 H33 H 0.3091 0.0739 0.1783 0.154 Uiso 0.5 1 calc R . . A 2
 C34 C 0.3564(8) 0.0535(3) 0.2613(13) 0.130(4) Uani 0.5 1 d D U . A 2
 H34 H 0.3446 0.0322 0.2535 0.156 Uiso 0.5 1 calc R . . A 2
 C35 C 0.3273(7) 0.1361(4) 0.1811(11) 0.121(3) Uani 0.5 1 d D U . A 2
 C36 C 0.3512(6) 0.1660(4) 0.1769(11) 0.123(3) Uani 0.5 1 d D U . A 2
 H36 H 0.3829 0.1697 0.2040 0.148 Uiso 0.5 1 calc R . . A 2
 C37 C 0.3285(7) 0.1904(3) 0.1329(12) 0.125(3) Uani 0.5 1 d D U . A 2
 H37 H 0.3447 0.2107 0.1301 0.150 Uiso 0.5 1 calc R . . A 2
 C38 C 0.2821(7) 0.1851(4) 0.0930(11) 0.121(4) Uani 0.5 1 d D U . A 2
 C39 C 0.2583(6) 0.1552(4) 0.0974(11) 0.121(4) Uani 0.5 1 d D U . A 2
 H39 H 0.2266 0.1515 0.0702 0.145 Uiso 0.5 1 calc R . . A 2
 C40 C 0.2809(7) 0.1308(3) 0.1414(12) 0.118(4) Uani 0.5 1 d D U . A 2
 H40 H 0.2645 0.1105 0.1444 0.142 Uiso 0.5 1 calc R . . A 2
 C41 C 0.2584(9) 0.2128(5) 0.0482(12) 0.125(5) Uani 0.5 1 d D U . . .
 C9A C 0.1612(4) 0.2081(2) 0.3152(6) 0.078(3) Uani 0.5 1 d D U . B 2
 H9A H 0.1337 0.2135 0.2802 0.094 Uiso 0.5 1 calc R . . B 2
 C10A C 0.1848(4) 0.23192(18) 0.3606(7) 0.078(3) Uani 0.5 1 d D U . B 2
 H10A H 0.1733 0.2534 0.3566 0.093 Uiso 0.5 1 calc R . . B 2
 C12A C 0.2420(4) 0.1927(2) 0.4174(7) 0.079(3) Uani 0.5 1 d D U . B 2
 H12A H 0.2696 0.1874 0.4523 0.095 Uiso 0.5 1 calc R . . B 2
 C13A C 0.2185(4) 0.16891(18) 0.3721(7) 0.079(3) Uani 0.5 1 d D U . B 2
 H13A H 0.2301 0.1474 0.3762 0.095 Uiso 0.5 1 calc R . . B 2

loop_
  _atom_site_aniso_label
  _atom_site_aniso_U_11
  _atom_site_aniso_U_22
  _atom_site_aniso_U_33
  _atom_site_aniso_U_23
  _atom_site_aniso_U_13
  _atom_site_aniso_U_12
 Zr1 0.0399(6) 0.0054(4) 0.0180(5) 0.000 0.000 0.000
 Zr2 0.0479(5) 0.0119(4) 0.0268(4) 0.000 -0.0140(3) 0.000
 Zr3 0.0677(18) 0.0339(13) 0.0768(19) 0.000 0.000 0.000
 Zr4 0.0781(12) 0.0330(8) 0.0993(14) 0.0013(8) -0.0085(10) 0.0043(7)
 Zr5 0.0632(18) 0.0334(13) 0.097(2) 0.000 0.000 0.000
 O1 0.041(2) 0.029(2) 0.033(2) -0.0029(17) -0.0194(19) -0.0042(18)
 O2 0.081(4) 0.022(2) 0.066(3) -0.003(2) -0.043(3) -0.007(2)
 O3 0.124(6) 0.067(5) 0.146(7) 0.005(5) -0.035(6) 0.011(5)
 O4 0.098(7) 0.020(4) 0.122(8) 0.013(5) 0.008(6) 0.020(5)
 O5 0.163(10) 0.105(6) 0.168(10) 0.000 -0.069(9) 0.000
 O6 0.189(12) 0.125(10) 0.175(12) 0.011(9) -0.084(9) 0.022(9)
 O7 0.063(9) 0.106(13) 0.27(3) 0.011(16) -0.037(13) -0.011(9)
 O8 0.056(5) 0.047(4) 0.095(7) 0.000 -0.023(4) 0.000
 O9 0.128(8) 0.043(4) 0.025(3) 0.000 -0.032(4) 0.000
 O10 0.153(9) 0.042(4) 0.028(3) 0.000 0.000 0.058(5)
 O11 0.052(4) 0.041(4) 0.128(8) 0.057(5) 0.000 0.000
 O12 0.196(19) 0.065(9) 0.077(10) 0.002(8) -0.009(11) 0.018(11)
 O14 0.051(9) 0.033(8) 0.156(19) -0.009(10) 0.000 0.000
 O15 0.079(11) 0.040(8) 0.093(13) 0.000 0.000 -0.012(8)
 O16 0.068(10) 0.042(8) 0.087(12) 0.019(8) 0.000 0.000
 O17 0.094(12) 0.035(10) 0.107(14) 0.000 0.000 -0.004(7)
 C1 0.065(4) 0.017(3) 0.042(3) 0.001(2) -0.034(3) 0.012(3)
 C2 0.089(4) 0.027(3) 0.059(4) -0.006(3) -0.038(3) -0.013(3)
 C3 0.123(6) 0.033(3) 0.085(5) -0.017(3) -0.054(4) -0.002(4)
 C4 0.134(6) 0.035(3) 0.091(5) -0.019(4) -0.055(5) -0.007(4)
 C5 0.115(5) 0.037(3) 0.059(4) -0.009(3) -0.031(4) -0.027(3)
 C6 0.123(6) 0.051(4) 0.090(5) -0.020(4) -0.059(5) -0.011(4)
 C7 0.122(6) 0.039(3) 0.090(5) -0.014(4) -0.060(4) -0.010(4)
 C8 0.113(5) 0.045(3) 0.051(3) -0.012(3) -0.019(3) -0.041(3)
 C9 0.119(6) 0.051(5) 0.064(6) -0.019(4) -0.021(5) -0.038(5)
 C10 0.121(6) 0.052(5) 0.058(5) -0.016(4) -0.017(5) -0.035(5)
 C11 0.120(5) 0.050(3) 0.036(3) -0.006(3) -0.004(3) -0.056(4)
 C12 0.118(6) 0.063(5) 0.065(5) -0.016(5) -0.014(5) -0.043(5)
 C13 0.118(6) 0.058(5) 0.067(6) -0.020(5) -0.015(5) -0.039(5)
 C14 0.125(7) 0.050(5) 0.029(4) 0.000 0.000 -0.061(5)
 C15 0.120(6) 0.057(5) 0.142(7) 0.008(5) -0.021(5) 0.021(5)
 C16 0.124(7) 0.066(5) 0.145(7) 0.009(6) -0.024(6) 0.018(6)
 C17 0.125(8) 0.066(6) 0.151(9) 0.013(7) -0.022(7) 0.017(7)
 C18 0.131(8) 0.069(6) 0.150(9) 0.012(7) -0.016(7) 0.023(7)
 C19 0.133(6) 0.086(5) 0.146(7) 0.010(5) -0.016(6) 0.023(5)
 C20 0.130(6) 0.086(5) 0.145(7) 0.011(5) -0.021(6) 0.022(5)
 C21 0.128(6) 0.078(5) 0.147(7) 0.008(5) -0.028(5) 0.018(5)
 C22 0.145(7) 0.103(6) 0.156(8) 0.015(6) -0.012(6) 0.029(6)
 C23 0.172(9) 0.117(8) 0.170(9) 0.024(7) -0.004(8) 0.016(7)
 C24 0.174(8) 0.130(7) 0.174(9) 0.020(6) -0.003(7) 0.023(7)
 C25 0.174(10) 0.125(8) 0.186(10) 0.005(6) 0.003(7) 0.038(8)
 C26 0.159(9) 0.129(9) 0.189(10) 0.000 0.000 0.054(7)
 C27 0.150(8) 0.127(9) 0.173(9) 0.006(6) -0.009(7) 0.044(8)
 C28 0.167(9) 0.100(6) 0.169(9) 0.003(6) -0.071(8) 0.009(7)
 C29 0.142(7) 0.083(5) 0.156(8) 0.008(6) -0.048(6) 0.006(6)
 C30 0.132(7) 0.079(5) 0.154(8) 0.006(6) -0.038(6) 0.012(6)
 C31 0.130(6) 0.075(5) 0.150(7) 0.007(5) -0.030(5) 0.016(5)
 C32 0.132(7) 0.080(5) 0.151(7) 0.008(6) -0.031(6) 0.018(6)
 C33 0.144(9) 0.084(6) 0.157(9) 0.014(7) -0.044(8) 0.009(7)
 C34 0.146(9) 0.086(7) 0.158(10) 0.016(7) -0.049(8) 0.003(7)
 C35 0.130(6) 0.086(5) 0.146(7) 0.013(5) -0.023(6) 0.018(5)
 C36 0.132(6) 0.094(5) 0.145(7) 0.014(5) -0.018(5) 0.017(5)
 C37 0.133(6) 0.091(5) 0.152(7) 0.015(5) -0.018(6) 0.025(6)
 C38 0.126(8) 0.086(7) 0.150(8) 0.022(7) -0.015(7) 0.031(7)
 C39 0.127(9) 0.087(7) 0.149(10) 0.025(8) -0.012(8) 0.028(7)
 C40 0.125(8) 0.086(7) 0.142(9) 0.019(7) -0.016(7) 0.023(7)
 C41 0.127(11) 0.093(7) 0.154(10) 0.031(7) -0.008(9) 0.038(9)
 C9A 0.122(6) 0.051(4) 0.062(5) -0.016(5) -0.024(5) -0.034(5)
 C10A 0.124(6) 0.049(5) 0.060(5) -0.013(5) -0.019(5) -0.038(5)
 C12A 0.119(6) 0.059(5) 0.059(5) -0.011(5) -0.021(5) -0.040(5)
 C13A 0.118(6) 0.056(5) 0.063(5) -0.013(5) -0.024(5) -0.037(5)

_geom_special_details
;
 All esds (except the esd in the dihedral angle between two l.s. planes)
 are estimated using the full covariance matrix.  The cell esds are taken
 into account individually in the estimation of esds in distances, angles
 and torsion angles; correlations between esds in cell parameters are only
 used when they are defined by crystal symmetry.  An approximate (isotropic)
 treatment of cell esds is used for estimating esds involving l.s. planes.
;
loop_
  _geom_bond_atom_site_label_1
  _geom_bond_atom_site_label_2
  _geom_bond_distance
  _geom_bond_site_symmetry_2
  _geom_bond_publ_flag
 Zr1 Zr2 3.4997(7) 9 ?
 Zr1 Zr2 3.4998(7) . ?
 Zr1 Zr2 3.4997(7) 10 ?
 Zr1 Zr2 3.4997(7) 2 ?
 Zr1 O1 2.164(4) 4 ?
 Zr1 O1 2.164(4) 10 ?
 Zr1 O1 2.164(4) 11 ?
 Zr1 O1 2.164(4) . ?
 Zr1 O10 2.165(8) 11 ?
 Zr1 O10 2.165(8) . ?
 Zr1 O11 2.181(8) 10 ?
 Zr1 O11 2.181(8) . ?
 Zr2 Zr1 3.4998(7) 9 ?
 Zr2 Zr2 3.5347(13) 10 ?
 Zr2 Zr2 3.5331(15) 2 ?
 Zr2 O2 2.252(4) . ?
 Zr2 O2 2.252(4) 12 ?
 Zr2 O8 2.201(8) . ?
 Zr2 O9 2.204(7) . ?
 Zr2 O10 2.133(4) . ?
 Zr2 O10 2.133(4) 3 ?
 Zr2 O11 2.115(4) . ?
 Zr2 O11 2.115(4) 2 ?
 Zr3 Zr4 3.492(2) . ?
 Zr3 Zr4 3.492(2) 10_556 ?
 Zr3 Zr4 3.492(2) 11_655 ?
 Zr3 Zr4 3.492(2) 4_656 ?
 Zr3 O4 2.253(12) 11_655 ?
 Zr3 O4 2.253(12) 4_656 ?
 Zr3 O4 2.253(12) 10_556 ?
 Zr3 O4 2.253(12) . ?
 Zr3 O14 2.31(2) 10_556 ?
 Zr3 O14 2.31(2) . ?
 Zr3 O15 2.077(17) 11_655 ?
 Zr3 O15 2.077(17) . ?
 Zr4 Zr4 3.515(4) 11_655 ?
 Zr4 Zr5 3.493(3) . ?
 Zr4 Zr5 2.723(2) 9_656 ?
 Zr4 O3 2.257(16) . ?
 Zr4 O5 2.042(8) . ?
 Zr4 O7 2.221(17) . ?
 Zr4 O12 2.172(16) . ?
 Zr4 O14 2.202(10) . ?
 Zr4 O15 2.066(8) . ?
 Zr4 O16 2.069(8) . ?
 Zr4 O17 2.245(9) . ?
 Zr5 Zr4 2.723(2) 12 ?
 Zr5 Zr5 1.353(6) 9_656 ?
 Zr5 O15 2.621(18) 3_556 ?
 Zr5 O15 2.621(18) 9_656 ?
 Zr5 O16 1.546(19) 9_656 ?
 Zr5 O16 2.070(16) 10_556 ?
 Zr5 O16 2.070(16) . ?
 Zr5 O16 1.546(19) 2_655 ?
 Zr5 O17 2.328(19) . ?
 Zr5 O17 2.070(19) 3_556 ?
 Zr5 O17 2.328(19) 11_655 ?
 Zr5 O17 2.070(19) 9_656 ?
 O1 C1 1.334(7) . ?
 O2 C1 1.220(7) . ?
 O3 C15 1.279(10) . ?
 O4 C15 1.254(10) . ?
 O5 Zr4 2.042(8) 12 ?
 O5 C28 1.303(9) 12 ?
 O5 C28 1.303(9) . ?
 O6 O16 1.61(2) . ?
 O6 C28 1.333(10) . ?
 O10 Zr2 2.133(4) 10 ?
 O11 Zr2 2.115(4) 2 ?
 O14 Zr4 2.202(10) 11_655 ?
 O15 Zr4 2.066(8) 10_556 ?
 O15 Zr5 2.621(18) 9_656 ?
 O16 Zr4 2.069(8) 11_655 ?
 O16 Zr5 1.546(19) 9_656 ?
 O16 O6 1.61(2) 11_655 ?
 O16 O16 1.40(3) 2_655 ?
 O17 Zr4 2.245(9) 10_556 ?
 O17 Zr5 2.070(19) 9_656 ?
 O17 O17 0.84(3) 3_556 ?
 C1 C2 1.493(9) . ?
 C2 C3 1.363(11) . ?
 C2 C7 1.376(11) . ?
 C3 C4 1.365(11) . ?
 C4 C5 1.338(12) . ?
 C5 C6 1.334(12) . ?
 C5 C8 1.516(8) . ?
 C6 C7 1.356(11) . ?
 C8 C9 1.393(8) . ?
 C8 C13 1.389(8) . ?
 C8 C9A 1.390(7) . ?
 C8 C13A 1.392(8) . ?
 C9 C10 1.394(8) . ?
 C10 C11 1.382(8) . ?
 C11 C12 1.397(8) . ?
 C11 C14 1.501(7) . ?
 C11 C10A 1.388(8) . ?
 C11 C12A 1.388(8) . ?
 C12 C13 1.392(8) . ?
 C14 C11 1.501(7) 6 ?
 C14 C14 1.336(19) 13_556 ?
 C15 C16 1.489(9) . ?
 C16 C17 1.394(8) . ?
 C16 C21 1.388(8) . ?
 C17 C18 1.388(8) . ?
 C18 C19 1.396(8) . ?
 C19 C20 1.387(8) . ?
 C19 C22 1.497(9) . ?
 C20 C21 1.396(8) . ?
 C22 C23 1.402(8) . ?
 C22 C27 1.385(8) . ?
 C23 C24 1.388(8) . ?
 C24 C25 1.396(8) . ?
 C25 C26 1.373(7) . ?
 C25 C27 1.84(2) 6 ?
 C25 C41 1.515(10) 6 ?
 C26 C25 1.373(7) 6 ?
 C26 C27 1.402(7) 6 ?
 C26 C27 1.402(7) . ?
 C26 C41 2.01(3) 6 ?
 C26 C41 2.01(3) . ?
 C27 C25 1.84(2) 6 ?
 C28 C29 1.533(9) . ?
 C29 C30 1.390(8) . ?
 C29 C34 1.399(8) . ?
 C30 C31 1.390(8) . ?
 C31 C32 1.393(8) . ?
 C32 C33 1.388(8) . ?
 C32 C35 1.506(9) . ?
 C33 C34 1.393(8) . ?
 C35 C36 1.395(8) . ?
 C35 C40 1.391(8) . ?
 C36 C37 1.388(8) . ?
 C37 C38 1.389(8) . ?
 C38 C39 1.396(8) . ?
 C38 C41 1.510(10) . ?
 C39 C40 1.389(8) . ?
 C41 C25 1.515(10) 6 ?
 C41 C41 1.63(4) 10 ?
 C9A C10A 1.394(8) . ?
 C12A C13A 1.392(8) . ?

loop_
  _geom_angle_atom_site_label_1
  _geom_angle_atom_site_label_2
  _geom_angle_atom_site_label_3
  _geom_angle
  _geom_angle_site_symmetry_1
  _geom_angle_site_symmetry_3
  _geom_angle_publ_flag
 Zr2 Zr1 Zr2 60.63(3) 9 10 ?
 Zr2 Zr1 Zr2 91.12(2) 10 2 ?
 Zr2 Zr1 Zr2 60.66(2) 9 2 ?
 Zr2 Zr1 Zr2 91.12(2) 9 . ?
 Zr2 Zr1 Zr2 60.63(3) 2 . ?
 Zr2 Zr1 Zr2 60.66(2) 10 . ?
 O1 Zr1 Zr2 111.94(12) . 10 ?
 O1 Zr1 Zr2 167.09(11) 4 . ?
 O1 Zr1 Zr2 75.98(11) 10 10 ?
 O1 Zr1 Zr2 75.98(11) 4 9 ?
 O1 Zr1 Zr2 111.94(12) 10 . ?
 O1 Zr1 Zr2 111.94(12) 4 2 ?
 O1 Zr1 Zr2 111.03(11) 4 10 ?
 O1 Zr1 Zr2 111.94(12) 11 9 ?
 O1 Zr1 Zr2 111.03(11) 11 . ?
 O1 Zr1 Zr2 111.03(11) 10 9 ?
 O1 Zr1 Zr2 75.98(11) . . ?
 O1 Zr1 Zr2 111.03(11) . 2 ?
 O1 Zr1 Zr2 167.09(11) . 9 ?
 O1 Zr1 Zr2 75.98(11) 11 2 ?
 O1 Zr1 Zr2 167.09(11) 10 2 ?
 O1 Zr1 Zr2 167.09(11) 11 10 ?
 O1 Zr1 O1 75.1(2) 4 11 ?
 O1 Zr1 O1 73.1(2) 11 . ?
 O1 Zr1 O1 116.9(2) 4 . ?
 O1 Zr1 O1 73.1(2) 4 10 ?
 O1 Zr1 O1 116.9(2) 11 10 ?
 O1 Zr1 O1 75.1(2) 10 . ?
 O1 Zr1 O10 79.6(2) . . ?
 O1 Zr1 O10 142.05(12) 11 . ?
 O1 Zr1 O10 142.05(12) 4 . ?
 O1 Zr1 O10 142.05(12) 10 11 ?
 O1 Zr1 O10 79.6(2) 10 . ?
 O1 Zr1 O10 142.05(12) . 11 ?
 O1 Zr1 O10 79.6(2) 4 11 ?
 O1 Zr1 O10 79.6(2) 11 11 ?
 O1 Zr1 O11 143.22(12) 11 10 ?
 O1 Zr1 O11 143.22(12) 4 . ?
 O1 Zr1 O11 79.4(2) . . ?
 O1 Zr1 O11 79.4(2) 10 10 ?
 O1 Zr1 O11 143.22(12) 10 . ?
 O1 Zr1 O11 143.22(12) . 10 ?
 O1 Zr1 O11 79.4(2) 4 10 ?
 O1 Zr1 O11 79.4(2) 11 . ?
 O10 Zr1 Zr2 35.17(13) 11 9 ?
 O10 Zr1 Zr2 35.17(13) . 10 ?
 O10 Zr1 Zr2 90.3(2) 11 . ?
 O10 Zr1 Zr2 90.3(2) . 9 ?
 O10 Zr1 Zr2 90.3(2) 11 10 ?
 O10 Zr1 Zr2 35.17(13) 11 2 ?
 O10 Zr1 Zr2 35.17(13) . . ?
 O10 Zr1 Zr2 90.3(2) . 2 ?
 O10 Zr1 O10 109.0(5) 11 . ?
 O10 Zr1 O11 69.97(19) . 10 ?
 O10 Zr1 O11 69.97(19) . . ?
 O10 Zr1 O11 69.97(19) 11 . ?
 O10 Zr1 O11 69.97(19) 11 10 ?
 O11 Zr1 Zr2 89.7(2) . 10 ?
 O11 Zr1 Zr2 34.83(13) 10 10 ?
 O11 Zr1 Zr2 89.7(2) 10 . ?
 O11 Zr1 Zr2 89.7(2) . 9 ?
 O11 Zr1 Zr2 34.83(13) . . ?
 O11 Zr1 Zr2 89.7(2) 10 2 ?
 O11 Zr1 Zr2 34.83(13) . 2 ?
 O11 Zr1 Zr2 34.83(13) 10 9 ?
 O11 Zr1 O11 107.7(5) . 10 ?
 Zr1 Zr2 Zr1 88.88(2) 9 . ?
 Zr1 Zr2 Zr2 59.683(13) . 2 ?
 Zr1 Zr2 Zr2 59.669(12) . 10 ?
 Zr1 Zr2 Zr2 59.669(12) 9 10 ?
 Zr1 Zr2 Zr2 59.683(13) 9 2 ?
 Zr2 Zr2 Zr2 90.0 2 10 ?
 O2 Zr2 Zr1 71.75(12) 12 9 ?
 O2 Zr2 Zr1 160.62(12) . 9 ?
 O2 Zr2 Zr1 71.75(12) . . ?
 O2 Zr2 Zr1 160.63(12) 12 . ?
 O2 Zr2 Zr2 108.46(14) . 10 ?
 O2 Zr2 Zr2 107.91(15) . 2 ?
 O2 Zr2 Zr2 107.91(15) 12 2 ?
 O2 Zr2 Zr2 108.46(14) 12 10 ?
 O2 Zr2 O2 127.6(2) . 12 ?
 O8 Zr2 Zr1 118.94(15) . 9 ?
 O8 Zr2 Zr1 118.94(15) . . ?
 O8 Zr2 Zr2 87.7(2) . 10 ?
 O8 Zr2 Zr2 177.7(2) . 2 ?
 O8 Zr2 O2 72.87(18) . 12 ?
 O8 Zr2 O2 72.87(18) . . ?
 O8 Zr2 O9 94.9(4) . . ?
 O9 Zr2 Zr1 118.82(15) . 9 ?
 O9 Zr2 Zr1 118.82(15) . . ?
 O9 Zr2 Zr2 87.5(3) . 2 ?
 O9 Zr2 Zr2 177.4(3) . 10 ?
 O9 Zr2 O2 72.38(17) . . ?
 O9 Zr2 O2 72.38(17) . 12 ?
 O10 Zr2 Zr1 88.4(2) . 9 ?
 O10 Zr2 Zr1 35.8(2) 3 9 ?
 O10 Zr2 Zr1 88.4(2) 3 . ?
 O10 Zr2 Zr1 35.8(2) . . ?
 O10 Zr2 Zr2 89.9(3) . 2 ?
 O10 Zr2 Zr2 34.03(17) . 10 ?
 O10 Zr2 Zr2 89.9(3) 3 2 ?
 O10 Zr2 Zr2 34.04(17) 3 10 ?
 O10 Zr2 O2 76.2(2) . . ?
 O10 Zr2 O2 139.9(2) . 12 ?
 O10 Zr2 O2 139.9(2) 3 . ?
 O10 Zr2 O2 76.2(2) 3 12 ?
 O10 Zr2 O8 88.2(4) 3 . ?
 O10 Zr2 O8 88.2(4) . . ?
 O10 Zr2 O9 145.87(16) . . ?
 O10 Zr2 O9 145.87(16) 3 . ?
 O10 Zr2 O10 68.1(3) . 3 ?
 O11 Zr2 Zr1 36.1(2) . . ?
 O11 Zr2 Zr1 36.1(2) 2 9 ?
 O11 Zr2 Zr1 87.8(2) 2 . ?
 O11 Zr2 Zr1 87.8(2) . 9 ?
 O11 Zr2 Zr2 89.8(3) . 10 ?
 O11 Zr2 Zr2 33.37(17) 2 2 ?
 O11 Zr2 Zr2 89.8(3) 2 10 ?
 O11 Zr2 Zr2 33.37(17) . 2 ?
 O11 Zr2 O2 138.7(2) . 12 ?
 O11 Zr2 O2 76.4(3) 2 12 ?
 O11 Zr2 O2 76.4(3) . . ?
 O11 Zr2 O2 138.7(2) 2 . ?
 O11 Zr2 O8 146.55(17) 2 . ?
 O11 Zr2 O8 146.55(17) . . ?
 O11 Zr2 O9 88.1(4) . . ?
 O11 Zr2 O9 88.1(4) 2 . ?
 O11 Zr2 O10 71.8(3) 2 3 ?
 O11 Zr2 O10 107.7(4) . 3 ?
 O11 Zr2 O10 107.7(4) 2 . ?
 O11 Zr2 O10 71.8(3) . . ?
 O11 Zr2 O11 66.7(4) 2 . ?
 Zr4 Zr3 Zr4 60.96(7) 11_655 4_656 ?
 Zr4 Zr3 Zr4 91.21(8) 11_655 10_556 ?
 Zr4 Zr3 Zr4 60.44(7) . 11_655 ?
 Zr4 Zr3 Zr4 91.21(8) . 4_656 ?
 Zr4 Zr3 Zr4 60.96(7) . 10_556 ?
 Zr4 Zr3 Zr4 60.44(7) 10_556 4_656 ?
 O4 Zr3 Zr4 165.2(3) 10_556 11_655 ?
 O4 Zr3 Zr4 165.2(3) . 4_656 ?
 O4 Zr3 Zr4 108.4(3) 4_656 11_655 ?
 O4 Zr3 Zr4 165.2(3) 4_656 . ?
 O4 Zr3 Zr4 108.4(3) 11_655 4_656 ?
 O4 Zr3 Zr4 108.4(3) . 10_556 ?
 O4 Zr3 Zr4 108.4(3) 10_556 . ?
 O4 Zr3 Zr4 112.4(3) 4_656 10_556 ?
 O4 Zr3 Zr4 74.4(3) 4_656 4_656 ?
 O4 Zr3 Zr4 165.2(3) 11_655 10_556 ?
 O4 Zr3 Zr4 74.4(3) . . ?
 O4 Zr3 Zr4 74.4(3) 10_556 10_556 ?
 O4 Zr3 Zr4 74.4(3) 11_655 11_655 ?
 O4 Zr3 Zr4 112.4(3) 11_655 . ?
 O4 Zr3 Zr4 112.4(3) . 11_655 ?
 O4 Zr3 Zr4 112.4(3) 10_556 4_656 ?
 O4 Zr3 O4 120.2(6) . 4_656 ?
 O4 Zr3 O4 120.2(6) 11_655 10_556 ?
 O4 Zr3 O4 80.6(6) 4_656 10_556 ?
 O4 Zr3 O4 80.6(6) . 11_655 ?
 O4 Zr3 O4 70.5(6) . 10_556 ?
 O4 Zr3 O4 70.5(6) 4_656 11_655 ?
 O4 Zr3 O14 75.1(4) . . ?
 O4 Zr3 O14 138.4(3) . 10_556 ?
 O4 Zr3 O14 138.4(3) 11_655 10_556 ?
 O4 Zr3 O14 138.4(3) 4_656 . ?
 O4 Zr3 O14 75.1(4) 4_656 10_556 ?
 O4 Zr3 O14 75.1(4) 10_556 10_556 ?
 O4 Zr3 O14 75.1(4) 11_655 . ?
 O4 Zr3 O14 138.4(3) 10_556 . ?
 O14 Zr3 Zr4 95.6(4) 10_556 . ?
 O14 Zr3 Zr4 95.6(4) . 10_556 ?
 O14 Zr3 Zr4 38.2(3) . . ?
 O14 Zr3 Zr4 38.2(3) . 11_655 ?
 O14 Zr3 Zr4 95.6(4) 10_556 11_655 ?
 O14 Zr3 Zr4 38.2(3) 10_556 4_656 ?
 O14 Zr3 Zr4 95.6(4) . 4_656 ?
 O14 Zr3 Zr4 38.2(3) 10_556 10_556 ?
 O14 Zr3 O14 121.1(9) 10_556 . ?
 O15 Zr3 Zr4 84.1(4) 11_655 10_556 ?
 O15 Zr3 Zr4 84.1(4) 11_655 . ?
 O15 Zr3 Zr4 84.1(4) . 4_656 ?
 O15 Zr3 Zr4 84.1(4) . 11_655 ?
 O15 Zr3 Zr4 32.44(17) . 10_556 ?
 O15 Zr3 Zr4 32.44(17) . . ?
 O15 Zr3 Zr4 32.44(17) 11_655 4_656 ?
 O15 Zr3 Zr4 32.44(17) 11_655 11_655 ?
 O15 Zr3 O4 144.5(3) . 11_655 ?
 O15 Zr3 O4 82.0(5) . . ?
 O15 Zr3 O4 82.0(5) 11_655 11_655 ?
 O15 Zr3 O4 144.5(3) 11_655 . ?
 O15 Zr3 O4 82.0(5) . 10_556 ?
 O15 Zr3 O4 144.5(3) 11_655 10_556 ?
 O15 Zr3 O4 82.0(5) 11_655 4_656 ?
 O15 Zr3 O4 144.5(3) . 4_656 ?
 O15 Zr3 O14 70.6(4) . . ?
 O15 Zr3 O14 70.6(4) . 10_556 ?
 O15 Zr3 O14 70.6(4) 11_655 10_556 ?
 O15 Zr3 O14 70.6(4) 11_655 . ?
 O15 Zr3 O15 94.8(10) 11_655 . ?
 Zr3 Zr4 Zr4 59.78(3) . 11_655 ?
 Zr3 Zr4 Zr5 88.79(6) . . ?
 Zr5 Zr4 Zr3 68.01(8) 9_656 . ?
 Zr5 Zr4 Zr4 49.81(5) 9_656 11_655 ?
 Zr5 Zr4 Zr4 59.79(3) . 11_655 ?
 Zr5 Zr4 Zr5 20.79(9) 9_656 . ?
 O3 Zr4 Zr3 72.6(4) . . ?
 O3 Zr4 Zr4 110.8(3) . 11_655 ?
 O3 Zr4 Zr5 161.1(4) . . ?
 O3 Zr4 Zr5 140.4(4) . 9_656 ?
 O5 Zr4 Zr3 163.2(4) . . ?
 O5 Zr4 Zr4 106.3(5) . 11_655 ?
 O5 Zr4 Zr5 96.0(4) . 9_656 ?
 O5 Zr4 Zr5 75.3(4) . . ?
 O5 Zr4 O3 123.5(5) . . ?
 O5 Zr4 O7 72.4(8) . . ?
 O5 Zr4 O12 69.4(7) . . ?
 O5 Zr4 O14 133.7(7) . . ?
 O5 Zr4 O15 145.3(6) . . ?
 O5 Zr4 O16 80.6(6) . . ?
 O5 Zr4 O17 76.8(5) . . ?
 O7 Zr4 Zr3 120.4(6) . . ?
 O7 Zr4 Zr4 174.7(6) . 11_655 ?
 O7 Zr4 Zr5 124.9(6) . 9_656 ?
 O7 Zr4 Zr5 115.1(6) . . ?
 O7 Zr4 O3 73.7(6) . . ?
 O7 Zr4 O17 77.1(8) . . ?
 O12 Zr4 Zr3 115.7(5) . . ?
 O12 Zr4 Zr4 85.6(5) . 11_655 ?
 O12 Zr4 Zr5 128.1(5) . 9_656 ?
 O12 Zr4 Zr5 119.9(4) . . ?
 O12 Zr4 O3 72.7(6) . . ?
 O12 Zr4 O7 98.6(9) . . ?
 O12 Zr4 O14 78.5(8) . . ?
 O12 Zr4 O17 145.5(5) . . ?
 O14 Zr4 Zr3 40.6(6) . . ?
 O14 Zr4 Zr4 37.1(3) . 11_655 ?
 O14 Zr4 Zr5 94.0(4) . . ?
 O14 Zr4 Zr5 78.1(5) . 9_656 ?
 O14 Zr4 O3 74.1(5) . . ?
 O14 Zr4 O7 146.9(6) . . ?
 O14 Zr4 O17 123.2(7) . . ?
 O15 Zr4 Zr3 32.6(4) . . ?
 O15 Zr4 Zr4 83.6(5) . 11_655 ?
 O15 Zr4 Zr5 64.7(5) . 9_656 ?
 O15 Zr4 Zr5 82.0(5) . . ?
 O15 Zr4 O3 80.5(6) . . ?
 O15 Zr4 O7 94.5(8) . . ?
 O15 Zr4 O12 145.3(6) . . ?
 O15 Zr4 O14 73.1(7) . . ?
 O15 Zr4 O16 94.1(8) . . ?
 O15 Zr4 O17 68.9(5) . . ?
 O16 Zr4 Zr3 83.0(5) . . ?
 O16 Zr4 Zr4 31.8(4) . 11_655 ?
 O16 Zr4 Zr5 32.4(4) . . ?
 O16 Zr4 Zr5 34.3(5) . 9_656 ?
 O16 Zr4 O3 142.4(5) . . ?
 O16 Zr4 O7 143.9(6) . . ?
 O16 Zr4 O12 93.9(7) . . ?
 O16 Zr4 O14 68.9(5) . . ?
 O16 Zr4 O17 73.5(7) . . ?
 O17 Zr4 Zr3 94.9(4) . . ?
 O17 Zr4 Zr4 97.6(5) . 11_655 ?
 O17 Zr4 Zr5 41.1(5) . . ?
 O17 Zr4 Zr5 48.1(5) . 9_656 ?
 O17 Zr4 O3 135.3(5) . . ?
 Zr5 Zr5 Zr4 113.61(7) 9_656 12 ?
 Zr5 Zr5 O15 144.3(4) 9_656 9_656 ?
 Zr5 Zr5 O15 144.3(4) 9_656 3_556 ?
 Zr5 Zr5 O16 48.3(5) 9_656 10_556 ?
 Zr5 Zr5 O16 90.9(6) 9_656 2_655 ?
 Zr5 Zr5 O16 90.9(6) 9_656 9_656 ?
 Zr5 Zr5 O16 48.3(5) 9_656 . ?
 Zr5 Zr5 O17 82.9(4) 9_656 9_656 ?
 Zr5 Zr5 O17 61.9(4) 9_656 . ?
 Zr5 Zr5 O17 61.9(4) 9_656 11_655 ?
 Zr5 Zr5 O17 82.9(4) 9_656 3_556 ?
 O15 Zr5 Zr4 92.9(3) 9_656 12 ?
 O15 Zr5 Zr4 45.43(16) 3_556 12 ?
 O15 Zr5 O15 71.4(7) 3_556 9_656 ?
 O16 Zr5 Zr4 49.0(3) 2_655 12 ?
 O16 Zr5 Zr4 130.1(3) 9_656 12 ?
 O16 Zr5 Zr4 138.77(12) 10_556 12 ?
 O16 Zr5 Zr4 77.3(4) . 12 ?
 O16 Zr5 O15 89.3(5) 2_655 3_556 ?
 O16 Zr5 O15 89.3(5) 9_656 3_556 ?
 O16 Zr5 O15 122.7(4) 10_556 3_556 ?
 O16 Zr5 O15 89.3(5) 2_655 9_656 ?
 O16 Zr5 O15 122.7(4) . 9_656 ?
 O16 Zr5 O15 122.7(4) . 3_556 ?
 O16 Zr5 O15 122.7(4) 10_556 9_656 ?
 O16 Zr5 O15 89.3(5) 9_656 9_656 ?
 O16 Zr5 O16 42.6(10) 9_656 10_556 ?
 O16 Zr5 O16 42.6(10) 2_655 . ?
 O16 Zr5 O16 139.2(4) 2_655 10_556 ?
 O16 Zr5 O16 96.6(10) 10_556 . ?
 O16 Zr5 O16 178.3(12) 2_655 9_656 ?
 O16 Zr5 O16 139.2(4) 9_656 . ?
 O16 Zr5 O17 85.3(3) 10_556 3_556 ?
 O16 Zr5 O17 90.4(3) 9_656 . ?
 O16 Zr5 O17 90.11(8) 9_656 9_656 ?
 O16 Zr5 O17 85.3(3) . 3_556 ?
 O16 Zr5 O17 71.7(3) . . ?
 O16 Zr5 O17 85.3(3) 10_556 9_656 ?
 O16 Zr5 O17 90.11(7) 9_656 3_556 ?
 O16 Zr5 O17 90.4(3) 9_656 11_655 ?
 O16 Zr5 O17 71.8(3) 10_556 . ?
 O16 Zr5 O17 71.8(3) 10_556 11_655 ?
 O16 Zr5 O17 90.11(8) 2_655 9_656 ?
 O16 Zr5 O17 71.8(3) . 11_655 ?
 O16 Zr5 O17 90.11(7) 2_655 3_556 ?
 O16 Zr5 O17 85.3(3) . 9_656 ?
 O16 Zr5 O17 90.4(3) 2_655 . ?
 O16 Zr5 O17 90.4(3) 2_655 11_655 ?
 O17 Zr5 Zr4 53.8(2) 3_556 12 ?
 O17 Zr5 Zr4 67.6(3) . 12 ?
 O17 Zr5 Zr4 133.6(2) 9_656 12 ?
 O17 Zr5 Zr4 139.28(5) 11_655 12 ?
 O17 Zr5 O15 132.8(6) 3_556 9_656 ?
 O17 Zr5 O15 153.8(5) 11_655 3_556 ?
 O17 Zr5 O15 153.8(5) . 9_656 ?
 O17 Zr5 O15 61.4(6) 9_656 9_656 ?
 O17 Zr5 O15 82.4(5) 11_655 9_656 ?
 O17 Zr5 O15 132.8(6) 9_656 3_556 ?
 O17 Zr5 O15 61.4(6) 3_556 3_556 ?
 O17 Zr5 O15 82.4(5) . 3_556 ?
 O17 Zr5 O17 165.8(9) 9_656 3_556 ?
 O17 Zr5 O17 21.0(7) 9_656 11_655 ?
 O17 Zr5 O17 144.8(3) 3_556 11_655 ?
 O17 Zr5 O17 144.8(3) 9_656 . ?
 O17 Zr5 O17 21.0(7) 3_556 . ?
 O17 Zr5 O17 123.8(8) 11_655 . ?
 C1 O1 Zr1 131.0(4) . . ?
 C1 O2 Zr2 135.9(4) . . ?
 C15 O3 Zr4 134.4(13) . . ?
 C15 O4 Zr3 132.5(9) . . ?
 Zr4 O5 Zr4 119.8(7) 12 . ?
 C28 O5 C28 151.6(18) 12 . ?
 C28 O6 O16 108.8(15) . . ?
 Zr2 O10 Zr1 109.0(3) 10 . ?
 Zr2 O10 Zr1 109.0(3) . . ?
 Zr2 O10 Zr2 111.9(3) 10 . ?
 Zr2 O11 Zr1 109.1(3) 2 . ?
 Zr2 O11 Zr1 109.1(3) . . ?
 Zr2 O11 Zr2 113.3(3) 2 . ?
 Zr4 O14 Zr3 101.2(7) . . ?
 Zr4 O14 Zr3 101.2(7) 11_655 . ?
 Zr4 O14 Zr4 105.9(7) . 11_655 ?
 Zr3 O15 Zr5 96.9(7) . 9_656 ?
 Zr4 O15 Zr3 114.9(5) 10_556 . ?
 Zr4 O15 Zr3 114.9(5) . . ?
 Zr4 O15 Zr4 118.1(8) . 10_556 ?
 Zr4 O15 Zr5 69.9(5) 10_556 9_656 ?
 Zr4 O15 Zr5 69.9(5) . 9_656 ?
 Zr4 O16 Zr4 116.3(7) . 11_655 ?
 Zr4 O16 Zr5 115.1(5) 11_655 . ?
 Zr4 O16 Zr5 115.1(5) . . ?
 Zr5 O16 Zr4 96.7(7) 9_656 11_655 ?
 Zr5 O16 Zr4 96.7(7) 9_656 . ?
 Zr5 O16 Zr5 40.8(4) 9_656 . ?
 O6 O16 O6 114.6(19) . 11_655 ?
 O16 O16 Zr4 121.1(4) 2_655 . ?
 O16 O16 Zr4 121.1(4) 2_655 11_655 ?
 O16 O16 Zr5 89.1(6) 2_655 9_656 ?
 O16 O16 Zr5 48.3(5) 2_655 . ?
 O16 O16 O6 121.6(9) 2_655 11_655 ?
 O16 O16 O6 121.6(9) 2_655 . ?
 Zr4 O17 Zr4 104.2(6) . 10_556 ?
 Zr4 O17 Zr5 99.6(6) . . ?
 Zr4 O17 Zr5 99.6(6) 10_556 . ?
 Zr5 O17 Zr4 78.2(5) 9_656 10_556 ?
 Zr5 O17 Zr4 78.2(5) 9_656 . ?
 Zr5 O17 Zr5 35.2(3) 9_656 . ?
 O17 O17 Zr4 126.9(3) 3_556 . ?
 O17 O17 Zr4 126.9(3) 3_556 10_556 ?
 O17 O17 Zr5 97.1(4) 3_556 9_656 ?
 O17 O17 Zr5 61.9(4) 3_556 . ?
 O1 C1 C2 114.6(5) . . ?
 O2 C1 O1 125.4(6) . . ?
 O2 C1 C2 119.7(6) . . ?
 C3 C2 C1 123.8(7) . . ?
 C3 C2 C7 116.5(7) . . ?
 C7 C2 C1 119.7(7) . . ?
 C2 C3 C4 120.9(9) . . ?
 C5 C4 C3 122.6(8) . . ?
 C4 C5 C8 120.5(8) . . ?
 C6 C5 C4 116.2(7) . . ?
 C6 C5 C8 123.3(8) . . ?
 C5 C6 C7 123.6(9) . . ?
 C6 C7 C2 120.1(8) . . ?
 C9 C8 C5 121.6(7) . . ?
 C13 C8 C5 118.4(7) . . ?
 C13 C8 C9 120.0(5) . . ?
 C9A C8 C5 121.6(6) . . ?
 C9A C8 C13A 119.8(5) . . ?
 C13A C8 C5 118.6(6) . . ?
 C8 C9 C10 119.8(5) . . ?
 C11 C10 C9 120.4(5) . . ?
 C10 C11 C12 119.9(5) . . ?
 C10 C11 C14 119.5(6) . . ?
 C12 C11 C14 120.5(6) . . ?
 C10A C11 C14 119.4(6) . . ?
 C12A C11 C14 120.6(6) . . ?
 C12A C11 C10A 120.0(5) . . ?
 C13 C12 C11 119.8(5) . . ?
 C8 C13 C12 120.1(5) . . ?
 C11 C14 C11 113.7(8) 6 . ?
 C14 C14 C11 123.2(4) 13_556 . ?
 C14 C14 C11 123.2(4) 13_556 6 ?
 O3 C15 C16 118.6(15) . . ?
 O4 C15 O3 121.3(15) . . ?
 O4 C15 C16 117.2(13) . . ?
 C17 C16 C15 119.9(13) . . ?
 C21 C16 C15 119.8(13) . . ?
 C21 C16 C17 120.0(5) . . ?
 C18 C17 C16 120.1(5) . . ?
 C17 C18 C19 119.8(5) . . ?
 C18 C19 C22 116.4(14) . . ?
 C20 C19 C18 120.2(5) . . ?
 C20 C19 C22 123.3(14) . . ?
 C19 C20 C21 119.9(5) . . ?
 C16 C21 C20 120.0(5) . . ?
 C23 C22 C19 113.0(15) . . ?
 C27 C22 C19 127.0(15) . . ?
 C27 C22 C23 120.0(5) . . ?
 C24 C23 C22 119.9(5) . . ?
 C23 C24 C25 120.1(5) . . ?
 C24 C25 C27 126.6(10) . 6 ?
 C24 C25 C41 151.3(15) . 6 ?
 C26 C25 C24 119.7(5) . . ?
 C26 C25 C27 49.0(6) . 6 ?
 C26 C25 C41 88.3(14) . 6 ?
 C41 C25 C27 75.6(12) 6 6 ?
 C25 C26 C25 136.9(16) 6 . ?
 C25 C26 C27 120.9(5) 6 6 ?
 C25 C26 C27 83.3(11) 6 . ?
 C25 C26 C27 83.3(11) . 6 ?
 C25 C26 C27 120.9(5) . . ?
 C25 C26 C41 48.8(8) 6 . ?
 C25 C26 C41 101.5(11) 6 6 ?
 C25 C26 C41 101.5(11) . . ?
 C25 C26 C41 48.8(8) . 6 ?
 C27 C26 C27 114.7(15) . 6 ?
 C27 C26 C41 168.2(10) 6 . ?
 C27 C26 C41 72.3(8) . . ?
 C27 C26 C41 168.2(10) . 6 ?
 C27 C26 C41 72.3(8) 6 6 ?
 C41 C26 C41 102.6(12) . 6 ?
 C22 C27 C25 147.0(10) . 6 ?
 C22 C27 C26 119.4(5) . . ?
 C26 C27 C25 47.7(6) . 6 ?
 O5 C28 O6 115.8(17) . . ?
 O5 C28 C29 129.8(15) . . ?
 O6 C28 C29 114.0(15) . . ?
 C30 C29 C28 126.1(14) . . ?
 C30 C29 C34 119.3(5) . . ?
 C34 C29 C28 114.6(14) . . ?
 C31 C30 C29 120.4(5) . . ?
 C30 C31 C32 120.1(5) . . ?
 C31 C32 C35 121.0(15) . . ?
 C33 C32 C31 119.9(5) . . ?
 C33 C32 C35 119.0(15) . . ?
 C32 C33 C34 120.0(5) . . ?
 C33 C34 C29 120.3(5) . . ?
 C36 C35 C32 119.9(15) . . ?
 C40 C35 C32 120.3(15) . . ?
 C40 C35 C36 119.8(5) . . ?
 C37 C36 C35 119.9(5) . . ?
 C36 C37 C38 120.4(5) . . ?
 C37 C38 C39 119.7(5) . . ?
 C37 C38 C41 118.1(17) . . ?
 C39 C38 C41 122.2(17) . . ?
 C40 C39 C38 120.0(5) . . ?
 C39 C40 C35 120.2(5) . . ?
 C25 C41 C26 43.0(7) 6 . ?
 C25 C41 C41 119.9(11) 6 10 ?
 C38 C41 C41 120.0(11) . 10 ?
 C41 C41 C26 128.7(6) 10 . ?
 C8 C9A C10A 120.0(5) . . ?
 C11 C10A C9A 120.0(5) . . ?
 C11 C12A C13A 120.1(5) . . ?
 C8 C13A C12A 120.0(5) . . ?

_shelx_fab_file
;
 0 0 2 353.33 0.00
 0 0 3 47.24 0.00
 0 0 4 208.45 0.00
 0 0 5 -0.47 0.00
 0 0 6 201.12 0.00
 0 0 7 -16.68 0.00
 0 0 8 101.37 0.00
 0 0 9 0.50 0.00
 0 0 10 16.00 0.00
 0 0 11 12.64 0.00
 0 0 12 27.40 0.00
 0 0 13 -9.09 0.00
 0 0 14 18.22 0.00
 0 0 15 2.58 0.00
 0 0 16 13.40 0.00
 0 0 17 -5.74 0.00
 0 0 18 7.52 0.00
 0 0 19 -3.74 0.00
 0 2 1 -20.13 0.00
 0 2 2 -80.28 0.00
 0 2 3 181.78 0.00
 0 2 4 -164.18 0.00
 0 2 5 23.57 0.00
 0 2 6 19.53 0.00
 0 2 7 8.53 0.00
 0 2 8 6.10 0.00
 0 2 9 -4.57 0.00
 0 2 10 -16.21 0.00
 0 2 11 7.62 0.00
 0 2 12 4.82 0.00
 0 2 13 -4.93 0.00
 0 2 14 4.38 0.00
 0 2 15 3.63 0.00
 0 2 16 -3.44 0.00
 0 2 17 4.93 0.00
 0 2 18 -3.73 0.00
 0 2 19 -4.17 0.00
 0 4 0 158.09 0.00
 0 4 1 53.52 0.00
 0 4 2 -247.89 0.00
 0 4 3 4.59 0.00
 0 4 4 -183.66 0.00
 0 4 5 -21.74 0.00
 0 4 6 -34.71 0.00
 0 4 7 -8.63 0.00
 0 4 8 -47.77 0.00
 0 4 9 -0.15 0.00
 0 4 10 -27.65 0.00
 0 4 11 12.03 0.00
 0 4 12 -12.12 0.00
 0 4 13 -7.49 0.00
 0 4 14 7.07 0.00
 0 4 15 4.05 0.00
 0 4 16 -9.41 0.00
 0 4 17 3.52 0.00
 0 4 18 -1.65 0.00
 0 4 19 -3.35 0.00
 0 6 0 -97.66 0.00
 0 6 1 11.35 0.00
 0 6 2 -39.94 0.00
 0 6 3 -105.72 0.00
 0 6 4 -59.75 0.00
 0 6 5 -39.39 0.00
 0 6 6 60.31 0.00
 0 6 7 -1.26 0.00
 0 6 8 0.67 0.00
 0 6 9 5.39 0.00
 0 6 10 -3.68 0.00
 0 6 11 11.51 0.00
 0 6 12 -0.71 0.00
 0 6 13 -1.37 0.00
 0 6 14 16.38 0.00
 0 6 15 -9.90 0.00
 0 6 16 -2.77 0.00
 0 6 17 -2.86 0.00
 0 6 18 -1.95 0.00
 0 6 19 -2.61 0.00
 0 8 0 22.16 0.00
 0 8 1 -117.21 0.00
 0 8 2 -117.07 0.00
 0 8 3 -101.46 0.00
 0 8 4 -21.18 0.00
 0 8 5 -19.86 0.00
 0 8 6 21.78 0.00
 0 8 7 -78.77 0.00
 0 8 8 6.28 0.00
 0 8 9 -18.69 0.00
 0 8 10 -4.01 0.00
 0 8 11 -11.76 0.00
 0 8 12 -3.19 0.00
 0 8 13 -1.31 0.00
 0 8 14 10.26 0.00
 0 8 15 -1.80 0.00
 0 8 16 -5.77 0.00
 0 8 17 5.67 0.00
 0 8 18 -3.45 0.00
 0 8 19 4.17 0.00
 0 10 0 59.52 0.00
 0 10 1 -46.26 0.00
 0 10 2 -3.93 0.00
 0 10 3 -67.62 0.00
 0 10 4 5.43 0.00
 0 10 5 -5.74 0.00
 0 10 6 15.67 0.00
 0 10 7 -35.40 0.00
 0 10 8 -3.16 0.00
 0 10 9 12.30 0.00
 0 10 10 -0.04 0.00
 0 10 11 0.81 0.00
 0 10 12 -8.35 0.00
 0 10 13 -4.84 0.00
 0 10 14 6.63 0.00
 0 10 15 -11.47 0.00
 0 10 16 1.77 0.00
 0 10 17 -6.68 0.00
 0 10 18 -2.43 0.00
 0 10 19 -3.59 0.00
 0 12 0 -13.03 0.00
 0 12 1 36.68 0.00
 0 12 2 5.50 0.00
 0 12 3 65.92 0.00
 0 12 4 14.19 0.00
 0 12 5 54.44 0.00
 0 12 6 19.70 0.00
 0 12 7 6.48 0.00
 0 12 8 9.30 0.00
 0 12 9 22.07 0.00
 0 12 10 -1.43 0.00
 0 12 11 21.23 0.00
 0 12 12 -8.64 0.00
 0 12 13 8.56 0.00
 0 12 14 1.96 0.00
 0 12 15 -5.00 0.00
 0 12 16 -0.90 0.00
 0 12 17 -4.50 0.00
 0 12 18 6.28 0.00
 0 12 19 -0.91 0.00
 0 14 0 7.44 0.00
 0 14 1 5.06 0.00
 0 14 2 -50.08 0.00
 0 14 3 -11.56 0.00
 0 14 4 8.84 0.00
 0 14 5 6.50 0.00
 0 14 6 -0.48 0.00
 0 14 7 -5.49 0.00
 0 14 8 1.03 0.00
 0 14 9 -0.21 0.00
 0 14 10 15.99 0.00
 0 14 11 4.71 0.00
 0 14 12 3.07 0.00
 0 14 13 -0.57 0.00
 0 14 14 3.14 0.00
 0 14 15 2.10 0.00
 0 14 16 3.58 0.00
 0 14 17 -1.14 0.00
 0 14 18 -0.88 0.00
 0 14 19 4.11 0.00
 0 16 0 31.62 0.00
 0 16 1 8.40 0.00
 0 16 2 39.99 0.00
 0 16 3 6.96 0.00
 0 16 4 60.10 0.00
 0 16 5 1.89 0.00
 0 16 6 6.16 0.00
 0 16 7 9.53 0.00
 0 16 8 9.90 0.00
 0 16 9 -4.42 0.00
 0 16 10 -0.16 0.00
 0 16 11 4.83 0.00
 0 16 12 -0.74 0.00
 0 16 13 -3.61 0.00
 0 16 14 -7.76 0.00
 0 16 15 2.77 0.00
 0 16 16 2.61 0.00
 0 16 17 -2.09 0.00
 0 16 18 -0.39 0.00
 0 18 0 37.03 0.00
 0 18 1 3.10 0.00
 0 18 3 -17.16 0.00
 0 18 4 28.83 0.00
 0 18 5 -11.34 0.00
 0 18 6 -4.15 0.00
 0 18 7 -12.26 0.00
 0 18 8 9.52 0.00
 0 18 9 -4.75 0.00
 0 18 10 2.21 0.00
 0 18 11 2.95 0.00
 0 18 12 3.84 0.00
 0 18 13 -5.16 0.00
 0 18 14 -6.42 0.00
 0 18 15 8.27 0.00
 0 18 16 -2.62 0.00
 0 18 17 0.86 0.00
 0 18 18 3.35 0.00
 0 20 0 -4.48 0.00
 0 20 1 15.35 0.00
 0 20 3 -3.18 0.00
 0 20 4 -33.86 0.00
 0 20 5 -3.08 0.00
 0 20 6 -18.79 0.00
 0 20 7 -14.17 0.00
 0 20 8 -5.49 0.00
 0 20 9 -3.39 0.00
 0 20 10 -5.98 0.00
 0 20 11 -0.96 0.00
 0 20 12 4.25 0.00
 0 20 13 -7.86 0.00
 0 20 14 3.45 0.00
 0 20 15 -2.01 0.00
 0 20 16 -3.26 0.00
 0 20 17 1.24 0.00
 0 20 18 -0.21 0.00
 0 22 0 0.24 0.00
 0 22 1 13.20 0.00
 0 22 2 -12.73 0.00
 0 22 3 -3.26 0.00
 0 22 4 -24.79 0.00
 0 22 5 5.73 0.00
 0 22 6 -12.19 0.00
 0 22 7 -8.57 0.00
 0 22 8 -3.01 0.00
 0 22 9 1.18 0.00
 0 22 10 -2.76 0.00
 0 22 11 -5.45 0.00
 0 22 12 -6.80 0.00
 0 22 13 1.28 0.00
 0 22 14 11.73 0.00
 0 22 15 -3.73 0.00
 0 22 16 -0.86 0.00
 0 22 17 -1.92 0.00
 0 24 0 -7.37 0.00
 0 24 1 -5.62 0.00
 0 24 2 16.05 0.00
 0 24 3 9.80 0.00
 0 24 4 -27.96 0.00
 0 24 5 13.02 0.00
 0 24 6 1.37 0.00
 0 24 7 3.66 0.00
 0 24 8 -1.82 0.00
 0 24 9 5.27 0.00
 0 24 10 2.15 0.00
 0 24 11 5.01 0.00
 0 24 12 -3.81 0.00
 0 24 13 8.54 0.00
 0 24 14 5.83 0.00
 0 24 15 -4.63 0.00
 0 24 16 -2.42 0.00
 0 24 17 11.55 0.00
 0 26 0 7.76 0.00
 0 26 1 5.14 0.00
 0 26 2 -2.71 0.00
 0 26 3 -14.47 0.00
 0 26 4 0.24 0.00
 0 26 5 -4.12 0.00
 0 26 6 4.23 0.00
 0 26 7 -8.81 0.00
 0 26 8 8.61 0.00
 0 26 9 2.85 0.00
 0 26 10 -2.13 0.00
 0 26 11 11.00 0.00
 0 26 12 6.04 0.00
 0 26 13 2.83 0.00
 0 26 15 -6.16 0.00
 0 26 16 3.55 0.00
 0 28 0 6.67 0.00
 0 28 1 2.55 0.00
 0 28 2 11.10 0.00
 0 28 3 5.31 0.00
 0 28 4 2.75 0.00
 0 28 5 5.03 0.00
 0 28 6 -0.04 0.00
 0 28 7 -5.31 0.00
 0 28 8 12.40 0.00
 0 28 9 1.95 0.00
 0 28 10 -7.99 0.00
 0 28 11 -4.58 0.00
 0 28 12 3.04 0.00
 0 28 14 -3.89 0.00
 0 28 15 4.08 0.00
 0 28 16 5.33 0.00
 0 30 0 -1.80 0.00
 0 30 1 12.32 0.00
 0 30 2 -9.25 0.00
 0 30 3 7.71 0.00
 0 30 4 11.73 0.00
 0 30 5 9.12 0.00
 0 30 6 -0.13 0.00
 0 30 7 4.77 0.00
 0 30 8 6.11 0.00
 0 30 9 4.48 0.00
 0 30 10 -3.98 0.00
 0 30 11 0.59 0.00
 0 30 12 5.32 0.00
 0 30 13 -0.36 0.00
 0 30 14 3.71 0.00
 0 30 15 3.50 0.00
 0 32 0 -9.92 0.00
 0 32 1 -13.51 0.00
 0 32 2 -3.86 0.00
 0 32 3 9.31 0.00
 0 32 4 0.42 0.00
 0 32 5 3.63 0.00
 0 32 6 4.60 0.00
 0 32 7 0.65 0.00
 0 32 8 3.21 0.00
 0 32 9 -3.61 0.00
 0 32 10 4.52 0.00
 0 32 11 -2.85 0.00
 0 32 12 -3.57 0.00
 0 32 13 -1.87 0.00
 0 32 14 2.78 0.00
 0 32 15 1.08 0.00
 0 34 0 -1.41 0.00
 0 34 1 -20.45 0.00
 0 34 2 -9.64 0.00
 0 34 3 -2.35 0.00
 0 34 4 -8.72 0.00
 0 34 5 -6.61 0.00
 0 34 6 -16.20 0.00
 0 34 7 3.83 0.00
 0 34 8 -7.68 0.00
 0 34 9 -6.31 0.00
 0 34 10 3.11 0.00
 0 34 11 -0.91 0.00
 0 34 12 -4.91 0.00
 0 34 13 -0.15 0.00
 0 34 14 4.10 0.00
 0 36 0 -3.92 0.00
 0 36 1 -2.67 0.00
 0 36 2 -1.77 0.00
 0 36 3 -2.70 0.00
 0 36 4 8.88 0.00
 0 36 5 0.86 0.00
 0 36 6 8.55 0.00
 0 36 7 3.98 0.00
 0 36 8 1.94 0.00
 0 36 9 0.89 0.00
 0 36 10 2.52 0.00
 0 36 11 0.97 0.00
 0 36 12 -6.33 0.00
 0 36 13 4.05 0.00
 0 38 0 -9.69 0.00
 0 38 1 7.96 0.00
 0 38 2 -6.76 0.00
 0 38 3 3.54 0.00
 0 38 4 -7.87 0.00
 0 38 5 -0.26 0.00
 0 38 6 -7.77 0.00
 0 38 7 7.50 0.00
 0 38 8 0.96 0.00
 0 38 9 1.45 0.00
 0 38 10 -0.87 0.00
 0 38 11 -1.36 0.00
 0 38 12 8.84 0.00
 0 40 0 0.31 0.00
 0 40 1 6.43 0.00
 0 40 2 -3.88 0.00
 0 40 3 2.98 0.00
 0 40 4 4.86 0.00
 0 40 5 -1.67 0.00
 0 40 6 0.39 0.00
 0 40 7 2.11 0.00
 0 40 8 -0.48 0.00
 0 40 9 5.40 0.00
 0 40 10 -0.97 0.00
 0 40 11 -3.69 0.00
 0 42 0 8.99 0.00
 0 42 1 -5.48 0.00
 0 42 2 2.89 0.00
 0 42 3 0.77 0.00
 0 42 4 -3.03 0.00
 0 42 5 -3.47 0.00
 0 42 6 -0.09 0.00
 0 42 7 -4.54 0.00
 0 42 8 1.74 0.00
 0 42 9 -5.81 0.00
 0 42 10 -3.17 0.00
 0 44 0 3.48 0.00
 0 44 1 10.42 0.00
 0 44 2 1.35 0.00
 0 44 3 0.61 0.00
 0 44 4 -2.86 0.00
 0 44 5 -2.16 0.00
 0 44 6 -0.63 0.00
 0 44 7 0.95 0.00
 0 44 8 -4.78 0.00
 0 46 0 2.22 0.00
 0 46 1 3.29 0.00
 0 46 2 3.50 0.00
 0 46 3 2.59 0.00
 0 46 4 -1.85 0.00
 0 46 5 5.66 0.00
 0 46 6 1.74 0.00
 0 48 2 3.77 0.00
 1 1 2 -1.09 0.00
 1 1 3 243.71 0.00
 1 1 4 -17.98 0.00
 1 1 5 15.16 0.00
 1 1 6 22.43 0.00
 1 1 7 -14.59 0.00
 1 1 8 26.26 0.00
 1 1 9 3.89 0.00
 1 1 10 0.37 0.00
 1 1 11 17.41 0.00
 1 1 12 3.31 0.00
 1 1 13 -12.64 0.00
 1 1 14 0.57 0.00
 1 1 15 1.61 0.00
 1 1 16 2.85 0.00
 1 1 17 1.79 0.00
 1 1 18 -1.66 0.00
 1 1 19 -1.52 0.00
 1 3 0 42.97 0.00
 1 3 1 -118.98 0.00
 1 3 2 -57.27 0.00
 1 3 3 -42.44 0.00
 1 3 4 -20.83 0.00
 1 3 5 -50.11 0.00
 1 3 6 -40.56 0.00
 1 3 7 -37.24 0.00
 1 3 8 -3.50 0.00
 1 3 9 -2.47 0.00
 1 3 10 -19.18 0.00
 1 3 11 8.54 0.00
 1 3 12 -2.85 0.00
 1 3 13 -8.35 0.00
 1 3 14 1.85 0.00
 1 3 15 -5.96 0.00
 1 3 16 -5.13 0.00
 1 3 17 -0.59 0.00
 1 3 18 1.74 0.00
 1 3 19 -1.11 0.00
 1 5 0 30.17 0.00
 1 5 1 92.36 0.00
 1 5 2 -41.28 0.00
 1 5 3 26.62 0.00
 1 5 4 -5.97 0.00
 1 5 5 30.59 0.00
 1 5 6 -16.58 0.00
 1 5 7 -0.59 0.00
 1 5 8 -0.57 0.00
 1 5 9 21.81 0.00
 1 5 10 -5.36 0.00
 1 5 11 5.53 0.00
 1 5 12 -3.12 0.00
 1 5 13 -1.74 0.00
 1 5 14 3.90 0.00
 1 5 15 -2.46 0.00
 1 5 16 -2.93 0.00
 1 5 17 6.93 0.00
 1 5 18 -0.57 0.00
 1 5 19 -4.31 0.00
 1 7 0 -105.56 0.00
 1 7 1 -82.90 0.00
 1 7 2 122.30 0.00
 1 7 3 33.93 0.00
 1 7 4 -1.63 0.00
 1 7 5 0.80 0.00
 1 7 6 29.22 0.00
 1 7 7 -37.12 0.00
 1 7 8 8.80 0.00
 1 7 9 8.51 0.00
 1 7 10 8.13 0.00
 1 7 11 -1.10 0.00
 1 7 12 4.68 0.00
 1 7 13 -1.80 0.00
 1 7 14 12.26 0.00
 1 7 15 -4.36 0.00
 1 7 16 0.22 0.00
 1 7 17 4.30 0.00
 1 7 18 1.95 0.00
 1 7 19 -4.26 0.00
 1 9 0 -53.21 0.00
 1 9 1 -51.29 0.00
 1 9 2 -36.11 0.00
 1 9 3 -41.90 0.00
 1 9 4 -56.00 0.00
 1 9 5 -30.77 0.00
 1 9 6 10.89 0.00
 1 9 7 -23.44 0.00
 1 9 8 -0.33 0.00
 1 9 9 -3.34 0.00
 1 9 10 -5.95 0.00
 1 9 11 -3.56 0.00
 1 9 12 -13.62 0.00
 1 9 13 -0.90 0.00
 1 9 14 2.22 0.00
 1 9 15 -8.46 0.00
 1 9 16 2.95 0.00
 1 9 17 3.75 0.00
 1 9 18 -0.15 0.00
 1 9 19 7.39 0.00
 1 11 0 -14.92 0.00
 1 11 1 25.23 0.00
 1 11 2 34.07 0.00
 1 11 3 59.95 0.00
 1 11 4 -4.20 0.00
 1 11 5 24.82 0.00
 1 11 6 10.16 0.00
 1 11 7 2.69 0.00
 1 11 8 9.88 0.00
 1 11 9 -4.67 0.00
 1 11 10 -5.07 0.00
 1 11 11 9.27 0.00
 1 11 12 -3.35 0.00
 1 11 13 2.06 0.00
 1 11 14 0.86 0.00
 1 11 15 -4.96 0.00
 1 11 16 2.37 0.00
 1 11 17 2.02 0.00
 1 11 18 -4.11 0.00
 1 11 19 1.01 0.00
 1 13 0 13.30 0.00
 1 13 1 -2.11 0.00
 1 13 2 -21.63 0.00
 1 13 3 -9.18 0.00
 1 13 4 38.12 0.00
 1 13 5 18.18 0.00
 1 13 6 8.32 0.00
 1 13 7 4.22 0.00
 1 13 8 24.08 0.00
 1 13 9 2.95 0.00
 1 13 10 -4.04 0.00
 1 13 11 0.32 0.00
 1 13 12 -4.52 0.00
 1 13 13 0.90 0.00
 1 13 14 0.06 0.00
 1 13 15 -3.94 0.00
 1 13 16 12.11 0.00
 1 13 17 2.73 0.00
 1 13 18 -2.66 0.00
 1 13 19 -5.21 0.00
 1 15 0 -26.10 0.00
 1 15 1 8.49 0.00
 1 15 2 7.28 0.00
 1 15 3 6.40 0.00
 1 15 4 3.14 0.00
 1 15 5 -13.20 0.00
 1 15 6 -5.33 0.00
 1 15 7 -3.20 0.00
 1 15 8 12.80 0.00
 1 15 9 -2.40 0.00
 1 15 10 -8.74 0.00
 1 15 11 -1.95 0.00
 1 15 12 0.06 0.00
 1 15 13 4.41 0.00
 1 15 14 -8.04 0.00
 1 15 15 -0.53 0.00
 1 15 16 -2.89 0.00
 1 15 17 -5.93 0.00
 1 15 18 5.21 0.00
 1 17 0 26.78 0.00
 1 17 1 33.26 0.00
 1 17 2 -22.45 0.00
 1 17 3 18.07 0.00
 1 17 4 20.79 0.00
 1 17 5 3.18 0.00
 1 17 6 -29.94 0.00
 1 17 7 20.56 0.00
 1 17 8 -7.61 0.00
 1 17 9 1.77 0.00
 1 17 10 -3.32 0.00
 1 17 11 -0.18 0.00
 1 17 12 9.94 0.00
 1 17 13 0.64 0.00
 1 17 14 -1.56 0.00
 1 17 15 3.95 0.00
 1 17 16 -0.59 0.00
 1 17 17 -2.47 0.00
 1 17 18 -1.89 0.00
 1 19 0 -10.45 0.00
 1 19 1 -28.26 0.00
 1 19 2 21.78 0.00
 1 19 3 -10.40 0.00
 1 19 4 -3.78 0.00
 1 19 5 -15.58 0.00
 1 19 6 10.10 0.00
 1 19 7 -2.89 0.00
 1 19 8 0.85 0.00
 1 19 9 -0.03 0.00
 1 19 10 -0.99 0.00
 1 19 11 7.18 0.00
 1 19 12 -3.65 0.00
 1 19 13 -5.35 0.00
 1 19 14 6.56 0.00
 1 19 15 5.11 0.00
 1 19 16 -3.88 0.00
 1 19 17 -1.63 0.00
 1 19 18 2.49 0.00
 1 21 0 5.96 0.00
 1 21 1 -15.05 0.00
 1 21 2 16.96 0.00
 1 21 3 -2.35 0.00
 1 21 4 -2.26 0.00
 1 21 5 -12.79 0.00
 1 21 6 -0.66 0.00
 1 21 7 -18.23 0.00
 1 21 8 -0.48 0.00
 1 21 9 -11.47 0.00
 1 21 10 1.81 0.00
 1 21 11 4.23 0.00
 1 21 12 -1.90 0.00
 1 21 13 -8.85 0.00
 1 21 14 -0.62 0.00
 1 21 15 2.12 0.00
 1 21 16 -0.05 0.00
 1 21 17 3.92 0.00
 1 21 18 -2.01 0.00
 1 23 0 -23.32 0.00
 1 23 1 9.37 0.00
 1 23 2 -2.74 0.00
 1 23 3 13.19 0.00
 1 23 4 -6.99 0.00
 1 23 5 16.51 0.00
 1 23 6 1.24 0.00
 1 23 7 -2.64 0.00
 1 23 8 1.82 0.00
 1 23 9 4.47 0.00
 1 23 10 2.95 0.00
 1 23 11 6.60 0.00
 1 23 12 -0.57 0.00
 1 23 13 -3.06 0.00
 1 23 14 1.93 0.00
 1 23 15 -5.30 0.00
 1 23 16 2.68 0.00
 1 23 17 1.74 0.00
 1 25 0 16.17 0.00
 1 25 1 -3.47 0.00
 1 25 2 12.94 0.00
 1 25 3 -7.21 0.00
 1 25 4 -3.23 0.00
 1 25 5 -0.59 0.00
 1 25 6 4.19 0.00
 1 25 7 -6.35 0.00
 1 25 8 4.54 0.00
 1 25 9 4.01 0.00
 1 25 10 3.81 0.00
 1 25 11 -4.89 0.00
 1 25 12 -0.11 0.00
 1 25 13 2.76 0.00
 1 25 14 0.90 0.00
 1 25 15 -5.73 0.00
 1 25 16 5.92 0.00
 1 25 17 7.88 0.00
 1 27 0 -14.79 0.00
 1 27 1 -0.59 0.00
 1 27 2 -1.78 0.00
 1 27 3 2.48 0.00
 1 27 4 2.14 0.00
 1 27 5 6.34 0.00
 1 27 6 -3.62 0.00
 1 27 7 -6.31 0.00
 1 27 8 0.12 0.00
 1 27 9 2.71 0.00
 1 27 10 -1.87 0.00
 1 27 11 1.61 0.00
 1 27 12 -2.63 0.00
 1 27 13 -0.16 0.00
 1 27 14 -3.43 0.00
 1 27 15 -0.05 0.00
 1 27 16 5.53 0.00
 1 29 0 -0.05 0.00
 1 29 1 -4.07 0.00
 1 29 2 4.88 0.00
 1 29 3 -4.20 0.00
 1 29 4 4.68 0.00
 1 29 5 2.22 0.00
 1 29 6 5.38 0.00
 1 29 7 -1.52 0.00
 1 29 8 2.31 0.00
 1 29 9 1.84 0.00
 1 29 10 0.21 0.00
 1 29 11 2.56 0.00
 1 29 12 1.47 0.00
 1 29 13 -5.31 0.00
 1 29 14 -5.30 0.00
 1 29 15 -0.27 0.00
 1 29 16 5.60 0.00
 1 31 0 21.04 0.00
 1 31 1 2.04 0.00
 1 31 2 -4.15 0.00
 1 31 3 1.28 0.00
 1 31 4 -2.19 0.00
 1 31 5 -1.62 0.00
 1 31 6 -8.91 0.00
 1 31 7 3.04 0.00
 1 31 8 2.17 0.00
 1 31 9 -5.98 0.00
 1 31 10 -3.89 0.00
 1 31 11 1.61 0.00
 1 31 12 0.26 0.00
 1 31 13 -1.18 0.00
 1 31 14 -0.47 0.00
 1 31 15 7.65 0.00
 1 33 0 -5.96 0.00
 1 33 1 -1.48 0.00
 1 33 2 -8.85 0.00
 1 33 3 -1.66 0.00
 1 33 4 0.60 0.00
 1 33 5 -3.64 0.00
 1 33 6 0.44 0.00
 1 33 7 4.40 0.00
 1 33 8 -2.39 0.00
 1 33 9 0.50 0.00
 1 33 10 0.85 0.00
 1 33 11 1.76 0.00
 1 33 12 -4.31 0.00
 1 33 13 -0.98 0.00
 1 33 14 6.00 0.00
 1 35 0 11.63 0.00
 1 35 1 -5.99 0.00
 1 35 2 2.41 0.00
 1 35 3 -0.92 0.00
 1 35 4 0.79 0.00
 1 35 5 0.57 0.00
 1 35 6 3.09 0.00
 1 35 7 -1.76 0.00
 1 35 8 2.73 0.00
 1 35 9 -1.68 0.00
 1 35 10 5.84 0.00
 1 35 11 0.54 0.00
 1 35 12 -2.70 0.00
 1 35 13 -0.07 0.00
 1 37 0 -8.25 0.00
 1 37 1 7.04 0.00
 1 37 2 5.34 0.00
 1 37 3 0.31 0.00
 1 37 4 2.30 0.00
 1 37 5 -6.45 0.00
 1 37 6 -1.56 0.00
 1 37 7 5.15 0.00
 1 37 8 -5.66 0.00
 1 37 9 4.36 0.00
 1 37 10 3.38 0.00
 1 37 11 0.64 0.00
 1 37 12 -0.86 0.00
 1 37 13 7.66 0.00
 1 39 0 7.57 0.00
 1 39 1 -2.72 0.00
 1 39 2 -0.82 0.00
 1 39 3 0.65 0.00
 1 39 4 0.87 0.00
 1 39 5 1.99 0.00
 1 39 6 0.42 0.00
 1 39 7 -0.19 0.00
 1 39 8 -1.83 0.00
 1 39 9 -1.89 0.00
 1 39 10 1.31 0.00
 1 39 11 1.42 0.00
 1 39 12 4.09 0.00
 1 41 0 -7.10 0.00
 1 41 1 -1.96 0.00
 1 41 2 -4.14 0.00
 1 41 3 -3.98 0.00
 1 41 4 1.96 0.00
 1 41 5 -0.68 0.00
 1 41 6 0.28 0.00
 1 41 7 -0.57 0.00
 1 41 8 0.11 0.00
 1 41 9 -1.10 0.00
 1 41 10 1.90 0.00
 1 43 0 1.33 0.00
 1 43 1 0.00 0.00
 1 43 2 0.86 0.00
 1 43 3 2.82 0.00
 1 43 4 0.45 0.00
 1 43 5 -0.74 0.00
 1 43 6 -2.55 0.00
 1 43 7 -2.51 0.00
 1 43 8 -5.77 0.00
 1 43 9 -1.25 0.00
 1 45 0 -0.78 0.00
 1 45 1 1.92 0.00
 1 45 2 2.19 0.00
 1 45 3 -1.25 0.00
 1 45 4 0.14 0.00
 1 45 5 2.10 0.00
 1 45 6 7.79 0.00
 1 45 7 1.08 0.00
 1 47 1 -7.34 0.00
 1 47 2 -5.06 0.00
 1 47 3 3.30 0.00
 1 47 4 0.77 0.00
 1 47 5 0.86 0.00
 2 0 0 288.58 0.00
 2 0 2 -252.19 0.00
 2 0 3 -76.72 0.00
 2 0 4 -2.23 0.00
 2 0 5 12.17 0.00
 2 0 6 -6.36 0.00
 2 0 7 -24.55 0.00
 2 0 8 23.99 0.00
 2 0 9 -5.02 0.00
 2 0 10 -27.44 0.00
 2 0 11 11.91 0.00
 2 0 12 -9.69 0.00
 2 0 13 -0.42 0.00
 2 0 14 0.12 0.00
 2 0 15 4.39 0.00
 2 0 16 1.34 0.00
 2 0 17 -2.72 0.00
 2 0 18 -3.19 0.00
 2 0 19 -0.12 0.00
 2 2 0 -758.07 0.00
 2 2 1 -103.02 0.00
 2 2 2 -105.84 0.00
 2 2 3 21.58 0.00
 2 2 4 -49.27 0.00
 2 2 5 16.30 0.00
 2 2 6 -14.56 0.00
 2 2 7 -2.48 0.00
 2 2 8 5.06 0.00
 2 2 9 -7.21 0.00
 2 2 10 -19.70 0.00
 2 2 11 4.26 0.00
 2 2 12 -4.56 0.00
 2 2 13 -1.97 0.00
 2 2 14 2.56 0.00
 2 2 15 -0.59 0.00
 2 2 16 -0.13 0.00
 2 2 17 1.62 0.00
 2 2 18 -2.20 0.00
 2 2 19 -1.42 0.00
 2 4 0 24.88 0.00
 2 4 1 -66.78 0.00
 2 4 2 170.48 0.00
 2 4 3 -49.44 0.00
 2 4 4 97.94 0.00
 2 4 5 -6.05 0.00
 2 4 6 44.18 0.00
 2 4 7 -6.69 0.00
 2 4 8 -0.54 0.00
 2 4 9 -8.31 0.00
 2 4 10 5.70 0.00
 2 4 11 -1.87 0.00
 2 4 12 -0.20 0.00
 2 4 13 -6.55 0.00
 2 4 14 6.93 0.00
 2 4 15 0.16 0.00
 2 4 16 -2.29 0.00
 2 4 17 1.87 0.00
 2 4 18 4.71 0.00
 2 4 19 -1.96 0.00
 2 6 0 -28.98 0.00
 2 6 1 49.12 0.00
 2 6 2 232.19 0.00
 2 6 3 -0.89 0.00
 2 6 4 37.96 0.00
 2 6 5 27.51 0.00
 2 6 6 49.57 0.00
 2 6 7 31.62 0.00
 2 6 8 2.02 0.00
 2 6 9 8.46 0.00
 2 6 10 7.85 0.00
 2 6 11 3.06 0.00
 2 6 12 0.96 0.00
 2 6 13 3.78 0.00
 2 6 14 4.47 0.00
 2 6 15 -7.67 0.00
 2 6 16 -1.98 0.00
 2 6 17 0.23 0.00
 2 6 18 1.48 0.00
 2 6 19 -0.73 0.00
 2 8 0 4.70 0.00
 2 8 1 41.88 0.00
 2 8 2 -16.74 0.00
 2 8 3 64.84 0.00
 2 8 4 -46.36 0.00
 2 8 5 73.75 0.00
 2 8 6 -17.01 0.00
 2 8 7 -3.76 0.00
 2 8 8 -3.90 0.00
 2 8 9 6.53 0.00
 2 8 10 -8.13 0.00
 2 8 11 -1.72 0.00
 2 8 12 -7.45 0.00
 2 8 13 5.79 0.00
 2 8 14 -0.34 0.00
 2 8 15 -4.49 0.00
 2 8 16 -1.65 0.00
 2 8 17 5.72 0.00
 2 8 18 1.28 0.00
 2 8 19 1.41 0.00
 2 10 0 30.74 0.00
 2 10 1 53.61 0.00
 2 10 2 13.49 0.00
 2 10 3 0.11 0.00
 2 10 4 -36.91 0.00
 2 10 5 16.44 0.00
 2 10 6 -12.45 0.00
 2 10 7 -8.37 0.00
 2 10 8 6.96 0.00
 2 10 9 7.39 0.00
 2 10 10 -0.08 0.00
 2 10 11 -0.47 0.00
 2 10 12 -4.81 0.00
 2 10 13 1.96 0.00
 2 10 14 2.74 0.00
 2 10 15 -6.98 0.00
 2 10 16 3.84 0.00
 2 10 17 1.07 0.00
 2 10 18 -4.82 0.00
 2 10 19 -0.25 0.00
 2 12 0 10.81 0.00
 2 12 1 1.07 0.00
 2 12 2 54.66 0.00
 2 12 3 1.46 0.00
 2 12 4 -3.69 0.00
 2 12 5 0.56 0.00
 2 12 6 14.02 0.00
 2 12 7 -14.92 0.00
 2 12 8 23.71 0.00
 2 12 9 -7.76 0.00
 2 12 10 -0.54 0.00
 2 12 11 5.89 0.00
 2 12 12 -2.32 0.00
 2 12 13 9.66 0.00
 2 12 14 1.75 0.00
 2 12 15 -3.23 0.00
 2 12 16 1.37 0.00
 2 12 17 1.36 0.00
 2 12 18 -5.79 0.00
 2 12 19 3.47 0.00
 2 14 0 5.66 0.00
 2 14 1 -5.73 0.00
 2 14 2 -38.01 0.00
 2 14 3 -41.40 0.00
 2 14 4 -19.56 0.00
 2 14 5 -32.42 0.00
 2 14 6 -6.22 0.00
 2 14 7 -22.84 0.00
 2 14 8 -3.82 0.00
 2 14 9 -18.82 0.00
 2 14 10 -1.00 0.00
 2 14 11 -5.68 0.00
 2 14 12 -0.74 0.00
 2 14 13 3.65 0.00
 2 14 14 -1.07 0.00
 2 14 15 0.73 0.00
 2 14 16 8.55 0.00
 2 14 17 -1.18 0.00
 2 14 18 -5.36 0.00
 2 14 19 5.67 0.00
 2 16 0 -13.28 0.00
 2 16 1 6.68 0.00
 2 16 2 -0.57 0.00
 2 16 3 6.77 0.00
 2 16 4 -2.39 0.00
 2 16 5 -6.06 0.00
 2 16 6 -16.37 0.00
 2 16 7 18.77 0.00
 2 16 8 -12.41 0.00
 2 16 9 -6.20 0.00
 2 16 10 -15.72 0.00
 2 16 11 -2.92 0.00
 2 16 12 0.23 0.00
 2 16 13 -1.74 0.00
 2 16 14 -4.19 0.00
 2 16 15 0.46 0.00
 2 16 16 7.97 0.00
 2 16 17 -1.16 0.00
 2 16 18 -1.97 0.00
 2 18 0 6.08 0.00
 2 18 1 -6.61 0.00
 2 18 2 -35.55 0.00
 2 18 3 -2.91 0.00
 2 18 4 8.28 0.00
 2 18 5 4.51 0.00
 2 18 6 1.79 0.00
 2 18 7 23.07 0.00
 2 18 8 1.37 0.00
 2 18 9 7.03 0.00
 2 18 10 -2.07 0.00
 2 18 11 6.64 0.00
 2 18 12 9.45 0.00
 2 18 13 -4.40 0.00
 2 18 14 -0.93 0.00
 2 18 15 3.52 0.00
 2 18 16 -1.22 0.00
 2 18 17 0.14 0.00
 2 18 18 3.29 0.00
 2 20 0 1.09 0.00
 2 20 1 -7.55 0.00
 2 20 2 6.79 0.00
 2 20 3 -0.89 0.00
 2 20 4 -4.59 0.00
 2 20 5 2.01 0.00
 2 20 6 18.91 0.00
 2 20 7 6.66 0.00
 2 20 8 9.28 0.00
 2 20 9 1.48 0.00
 2 20 10 -3.91 0.00
 2 20 11 10.23 0.00
 2 20 12 2.98 0.00
 2 20 13 -3.71 0.00
 2 20 14 0.57 0.00
 2 20 15 -1.12 0.00
 2 20 16 -7.90 0.00
 2 20 17 -1.61 0.00
 2 20 18 3.43 0.00
 2 22 0 12.82 0.00
 2 22 1 -5.14 0.00
 2 22 2 9.73 0.00
 2 22 3 -6.30 0.00
 2 22 4 14.36 0.00
 2 22 5 -0.09 0.00
 2 22 6 21.65 0.00
 2 22 7 -4.47 0.00
 2 22 8 4.31 0.00
 2 22 9 -2.83 0.00
 2 22 10 -3.13 0.00
 2 22 11 -0.92 0.00
 2 22 12 -7.23 0.00
 2 22 13 0.27 0.00
 2 22 14 5.41 0.00
 2 22 15 -2.38 0.00
 2 22 16 -3.84 0.00
 2 22 17 -2.49 0.00
 2 24 0 -9.61 0.00
 2 24 1 -12.71 0.00
 2 24 2 15.40 0.00
 2 24 3 6.39 0.00
 2 24 4 -5.72 0.00
 2 24 5 4.65 0.00
 2 24 6 17.46 0.00
 2 24 7 0.00 0.00
 2 24 8 -2.96 0.00
 2 24 9 -3.12 0.00
 2 24 10 4.69 0.00
 2 24 11 -5.69 0.00
 2 24 12 -2.64 0.00
 2 24 13 -0.46 0.00
 2 24 14 0.11 0.00
 2 24 15 -3.49 0.00
 2 24 16 0.06 0.00
 2 24 17 7.41 0.00
 2 26 0 -11.33 0.00
 2 26 1 -1.48 0.00
 2 26 2 -19.10 0.00
 2 26 3 -9.44 0.00
 2 26 4 -3.46 0.00
 2 26 5 0.28 0.00
 2 26 6 -3.54 0.00
 2 26 7 -3.25 0.00
 2 26 8 -5.93 0.00
 2 26 9 -2.83 0.00
 2 26 10 -1.51 0.00
 2 26 11 -4.29 0.00
 2 26 12 1.53 0.00
 2 26 13 -2.78 0.00
 2 26 14 -3.21 0.00
 2 26 15 -4.18 0.00
 2 26 16 6.84 0.00
 2 28 0 6.52 0.00
 2 28 1 -9.21 0.00
 2 28 2 3.68 0.00
 2 28 3 -2.16 0.00
 2 28 4 -1.97 0.00
 2 28 5 1.57 0.00
 2 28 6 -9.23 0.00
 2 28 7 -2.06 0.00
 2 28 8 1.12 0.00
 2 28 9 -0.20 0.00
 2 28 10 -6.94 0.00
 2 28 11 -8.20 0.00
 2 28 12 0.07 0.00
 2 28 13 5.11 0.00
 2 28 14 -3.25 0.00
 2 28 15 0.21 0.00
 2 28 16 2.96 0.00
 2 30 0 18.31 0.00
 2 30 1 3.14 0.00
 2 30 2 2.78 0.00
 2 30 3 -3.40 0.00
 2 30 4 9.44 0.00
 2 30 5 -3.88 0.00
 2 30 6 -4.35 0.00
 2 30 7 -0.95 0.00
 2 30 8 5.51 0.00
 2 30 9 -1.07 0.00
 2 30 10 -0.36 0.00
 2 30 11 0.29 0.00
 2 30 12 3.32 0.00
 2 30 13 -0.72 0.00
 2 30 14 1.71 0.00
 2 30 15 3.49 0.00
 2 32 0 5.21 0.00
 2 32 1 2.32 0.00
 2 32 2 4.91 0.00
 2 32 3 6.12 0.00
 2 32 4 -2.65 0.00
 2 32 5 -4.25 0.00
 2 32 6 2.88 0.00
 2 32 7 0.06 0.00
 2 32 8 -0.61 0.00
 2 32 9 -3.58 0.00
 2 32 10 0.53 0.00
 2 32 11 1.25 0.00
 2 32 12 -2.09 0.00
 2 32 13 -1.73 0.00
 2 32 14 0.56 0.00
 2 32 15 3.99 0.00
 2 34 0 3.67 0.00
 2 34 1 0.37 0.00
 2 34 2 -1.81 0.00
 2 34 3 3.90 0.00
 2 34 4 -7.19 0.00
 2 34 5 -6.24 0.00
 2 34 6 -6.53 0.00
 2 34 7 5.73 0.00
 2 34 8 -6.59 0.00
 2 34 9 -2.76 0.00
 2 34 10 -1.17 0.00
 2 34 11 3.59 0.00
 2 34 12 -3.03 0.00
 2 34 13 -0.03 0.00
 2 34 14 5.92 0.00
 2 36 0 2.36 0.00
 2 36 1 3.21 0.00
 2 36 2 6.39 0.00
 2 36 3 -2.81 0.00
 2 36 4 8.39 0.00
 2 36 5 0.86 0.00
 2 36 6 17.78 0.00
 2 36 7 0.07 0.00
 2 36 8 1.09 0.00
 2 36 9 -2.62 0.00
 2 36 10 1.56 0.00
 2 36 11 -0.03 0.00
 2 36 12 -3.54 0.00
 2 36 13 3.77 0.00
 2 38 0 5.41 0.00
 2 38 1 1.03 0.00
 2 38 2 8.55 0.00
 2 38 3 -0.99 0.00
 2 38 4 -1.80 0.00
 2 38 5 2.09 0.00
 2 38 6 3.46 0.00
 2 38 7 2.77 0.00
 2 38 8 -0.87 0.00
 2 38 9 -2.10 0.00
 2 38 10 -0.26 0.00
 2 38 11 -1.77 0.00
 2 38 12 3.92 0.00
 2 40 0 -3.58 0.00
 2 40 1 1.74 0.00
 2 40 2 -3.48 0.00
 2 40 3 -3.30 0.00
 2 40 4 1.80 0.00
 2 40 5 0.08 0.00
 2 40 6 0.00 0.00
 2 40 7 0.15 0.00
 2 40 8 -5.21 0.00
 2 40 9 2.78 0.00
 2 40 10 1.34 0.00
 2 40 11 -4.08 0.00
 2 42 0 -2.77 0.00
 2 42 1 -5.49 0.00
 2 42 2 -2.26 0.00
 2 42 3 -3.04 0.00
 2 42 4 -1.20 0.00
 2 42 5 -0.61 0.00
 2 42 6 -0.40 0.00
 2 42 7 -1.29 0.00
 2 42 8 0.12 0.00
 2 42 9 -2.87 0.00
 2 42 10 1.60 0.00
 2 44 0 1.74 0.00
 2 44 1 4.33 0.00
 2 44 2 0.90 0.00
 2 44 3 -0.54 0.00
 2 44 4 3.49 0.00
 2 44 5 1.33 0.00
 2 44 6 2.79 0.00
 2 44 7 2.09 0.00
 2 44 8 1.51 0.00
 2 46 0 -2.64 0.00
 2 46 1 -2.36 0.00
 2 46 2 -4.40 0.00
 2 46 3 5.15 0.00
 2 46 4 -1.49 0.00
 2 46 5 7.43 0.00
 2 46 6 2.75 0.00
 2 48 1 -10.98 0.00
 2 48 2 -4.77 0.00
 2 48 3 -3.01 0.00
 3 1 0 -35.06 0.00
 3 1 1 -143.47 0.00
 3 1 2 -0.20 0.00
 3 1 3 9.69 0.00
 3 1 4 -5.54 0.00
 3 1 5 -58.82 0.00
 3 1 6 -8.34 0.00
 3 1 7 -17.03 0.00
 3 1 8 -9.46 0.00
 3 1 9 -5.79 0.00
 3 1 10 -9.76 0.00
 3 1 11 14.66 0.00
 3 1 12 -3.35 0.00
 3 1 13 2.01 0.00
 3 1 14 -6.38 0.00
 3 1 15 3.70 0.00
 3 1 16 3.80 0.00
 3 1 17 -3.04 0.00
 3 1 18 -4.42 0.00
 3 1 19 -1.97 0.00
 3 3 0 -84.03 0.00
 3 3 1 67.36 0.00
 3 3 2 -28.48 0.00
 3 3 3 -63.28 0.00
 3 3 4 54.70 0.00
 3 3 5 -21.27 0.00
 3 3 6 6.91 0.00
 3 3 7 3.70 0.00
 3 3 8 27.13 0.00
 3 3 9 -11.92 0.00
 3 3 10 7.09 0.00
 3 3 11 -4.17 0.00
 3 3 12 5.33 0.00
 3 3 13 -2.31 0.00
 3 3 14 0.73 0.00
 3 3 15 -2.43 0.00
 3 3 16 -1.14 0.00
 3 3 17 -0.59 0.00
 3 3 18 0.77 0.00
 3 3 19 -0.47 0.00
 3 5 0 31.03 0.00
 3 5 1 135.23 0.00
 3 5 2 54.73 0.00
 3 5 3 -55.05 0.00
 3 5 4 82.86 0.00
 3 5 5 7.08 0.00
 3 5 6 18.92 0.00
 3 5 7 5.43 0.00
 3 5 8 3.84 0.00
 3 5 9 1.81 0.00
 3 5 10 4.81 0.00
 3 5 11 -3.76 0.00
 3 5 12 -2.32 0.00
 3 5 13 0.10 0.00
 3 5 14 3.60 0.00
 3 5 15 -2.80 0.00
 3 5 16 2.59 0.00
 3 5 17 3.68 0.00
 3 5 18 1.79 0.00
 3 5 19 -2.17 0.00
 3 7 0 -85.18 0.00
 3 7 1 37.93 0.00
 3 7 2 142.63 0.00
 3 7 3 28.29 0.00
 3 7 4 5.80 0.00
 3 7 5 31.38 0.00
 3 7 6 3.81 0.00
 3 7 7 4.01 0.00
 3 7 8 -16.83 0.00
 3 7 9 10.27 0.00
 3 7 10 -1.88 0.00
 3 7 11 2.17 0.00
 3 7 12 -5.16 0.00
 3 7 13 4.79 0.00
 3 7 14 1.02 0.00
 3 7 15 0.08 0.00
 3 7 16 -5.04 0.00
 3 7 17 2.15 0.00
 3 7 18 0.64 0.00
 3 7 19 -2.70 0.00
 3 9 0 19.21 0.00
 3 9 1 -13.08 0.00
 3 9 2 22.24 0.00
 3 9 3 -19.09 0.00
 3 9 4 -45.02 0.00
 3 9 5 9.47 0.00
 3 9 6 -1.11 0.00
 3 9 7 -2.24 0.00
 3 9 8 -13.66 0.00
 3 9 9 -0.01 0.00
 3 9 10 2.80 0.00
 3 9 11 1.22 0.00
 3 9 12 -6.67 0.00
 3 9 13 0.56 0.00
 3 9 14 1.21 0.00
 3 9 15 -5.33 0.00
 3 9 16 0.33 0.00
 3 9 17 -2.54 0.00
 3 9 18 -2.75 0.00
 3 9 19 4.27 0.00
 3 11 0 10.26 0.00
 3 11 1 14.62 0.00
 3 11 2 15.82 0.00
 3 11 3 28.72 0.00
 3 11 4 -30.20 0.00
 3 11 5 5.74 0.00
 3 11 6 -6.77 0.00
 3 11 7 -8.87 0.00
 3 11 8 -1.02 0.00
 3 11 9 -8.98 0.00
 3 11 10 5.46 0.00
 3 11 11 15.89 0.00
 3 11 12 4.94 0.00
 3 11 13 4.94 0.00
 3 11 14 2.66 0.00
 3 11 15 -3.15 0.00
 3 11 16 3.70 0.00
 3 11 17 -3.78 0.00
 3 11 18 -3.92 0.00
 3 11 19 -0.99 0.00
 3 13 0 24.05 0.00
 3 13 1 -37.00 0.00
 3 13 2 -38.52 0.00
 3 13 3 -29.52 0.00
 3 13 4 -4.06 0.00
 3 13 5 -13.02 0.00
 3 13 6 -24.97 0.00
 3 13 7 -20.36 0.00
 3 13 8 1.57 0.00
 3 13 9 -2.91 0.00
 3 13 10 1.54 0.00
 3 13 11 5.78 0.00
 3 13 12 0.23 0.00
 3 13 13 3.14 0.00
 3 13 14 -0.38 0.00
 3 13 15 0.99 0.00
 3 13 16 5.01 0.00
 3 13 17 3.26 0.00
 3 13 18 -5.54 0.00
 3 13 19 -3.61 0.00
 3 15 0 14.25 0.00
 3 15 1 -47.41 0.00
 3 15 2 11.27 0.00
 3 15 3 -32.47 0.00
 3 15 4 -0.04 0.00
 3 15 5 -33.98 0.00
 3 15 6 -19.45 0.00
 3 15 7 -14.86 0.00
 3 15 8 -0.35 0.00
 3 15 9 -4.78 0.00
 3 15 10 -6.58 0.00
 3 15 11 -4.33 0.00
 3 15 12 -0.85 0.00
 3 15 13 -3.24 0.00
 3 15 14 -4.16 0.00
 3 15 15 -0.91 0.00
 3 15 16 -2.24 0.00
 3 15 17 -4.95 0.00
 3 15 18 2.74 0.00
 3 17 0 4.04 0.00
 3 17 1 5.60 0.00
 3 17 2 -26.53 0.00
 3 17 3 9.44 0.00
 3 17 4 29.08 0.00
 3 17 5 -9.18 0.00
 3 17 6 -2.25 0.00
 3 17 7 2.92 0.00
 3 17 8 7.91 0.00
 3 17 9 -3.13 0.00
 3 17 10 2.69 0.00
 3 17 11 -2.73 0.00
 3 17 12 5.14 0.00
 3 17 13 -0.67 0.00
 3 17 14 -2.95 0.00
 3 17 15 3.75 0.00
 3 17 16 0.51 0.00
 3 17 17 -4.71 0.00
 3 17 18 0.89 0.00
 3 19 0 -29.12 0.00
 3 19 1 2.94 0.00
 3 19 2 -6.24 0.00
 3 19 3 16.18 0.00
 3 19 4 -4.30 0.00
 3 19 5 9.75 0.00
 3 19 6 19.11 0.00
 3 19 7 14.17 0.00
 3 19 8 5.29 0.00
 3 19 9 7.88 0.00
 3 19 10 0.56 0.00
 3 19 11 2.13 0.00
 3 19 12 -1.79 0.00
 3 19 13 -1.99 0.00
 3 19 14 9.75 0.00
 3 19 15 5.96 0.00
 3 19 16 -2.15 0.00
 3 19 17 -4.03 0.00
 3 19 18 -0.18 0.00
 3 21 0 -16.02 0.00
 3 21 1 -0.31 0.00
 3 21 2 -3.02 0.00
 3 21 3 12.64 0.00
 3 21 4 -3.77 0.00
 3 21 5 0.43 0.00
 3 21 6 5.38 0.00
 3 21 7 -4.38 0.00
 3 21 8 -8.53 0.00
 3 21 9 -3.23 0.00
 3 21 10 -4.50 0.00
 3 21 11 0.68 0.00
 3 21 12 -1.60 0.00
 3 21 13 -4.40 0.00
 3 21 14 4.18 0.00
 3 21 15 4.37 0.00
 3 21 16 2.81 0.00
 3 21 17 2.60 0.00
 3 23 0 6.93 0.00
 3 23 1 5.26 0.00
 3 23 2 -1.26 0.00
 3 23 3 9.08 0.00
 3 23 4 -6.47 0.00
 3 23 5 16.08 0.00
 3 23 6 4.68 0.00
 3 23 7 2.22 0.00
 3 23 8 -0.82 0.00
 3 23 9 3.03 0.00
 3 23 10 -0.53 0.00
 3 23 11 0.86 0.00
 3 23 12 -1.13 0.00
 3 23 13 3.39 0.00
 3 23 14 1.71 0.00
 3 23 15 -0.90 0.00
 3 23 16 2.12 0.00
 3 23 17 3.22 0.00
 3 25 0 26.14 0.00
 3 25 1 -4.55 0.00
 3 25 2 14.16 0.00
 3 25 3 -2.98 0.00
 3 25 4 -4.92 0.00
 3 25 5 3.64 0.00
 3 25 6 4.58 0.00
 3 25 7 4.29 0.00
 3 25 8 -0.33 0.00
 3 25 9 10.95 0.00
 3 25 10 0.09 0.00
 3 25 11 -4.12 0.00
 3 25 12 -1.92 0.00
 3 25 13 4.41 0.00
 3 25 14 1.90 0.00
 3 25 15 -6.68 0.00
 3 25 16 3.29 0.00
 3 25 17 1.45 0.00
 3 27 0 -4.07 0.00
 3 27 1 -1.85 0.00
 3 27 2 -6.66 0.00
 3 27 3 -0.60 0.00
 3 27 4 -7.58 0.00
 3 27 5 -0.95 0.00
 3 27 6 -7.24 0.00
 3 27 7 -10.19 0.00
 3 27 8 -4.22 0.00
 3 27 9 -4.06 0.00
 3 27 10 1.32 0.00
 3 27 11 -5.48 0.00
 3 27 12 0.99 0.00
 3 27 13 0.91 0.00
 3 27 14 -3.57 0.00
 3 27 15 -1.62 0.00
 3 27 16 -0.31 0.00
 3 29 0 -12.02 0.00
 3 29 1 4.65 0.00
 3 29 2 -3.73 0.00
 3 29 3 3.90 0.00
 3 29 4 -3.79 0.00
 3 29 5 -0.61 0.00
 3 29 6 -0.01 0.00
 3 29 7 -1.14 0.00
 3 29 8 2.01 0.00
 3 29 9 -2.21 0.00
 3 29 10 5.69 0.00
 3 29 11 -2.80 0.00
 3 29 12 5.72 0.00
 3 29 13 -1.12 0.00
 3 29 14 -2.95 0.00
 3 29 15 3.35 0.00
 3 31 0 17.94 0.00
 3 31 1 -0.45 0.00
 3 31 2 -0.05 0.00
 3 31 3 5.47 0.00
 3 31 4 1.22 0.00
 3 31 5 -1.10 0.00
 3 31 6 -3.64 0.00
 3 31 7 3.56 0.00
 3 31 8 4.10 0.00
 3 31 9 -1.90 0.00
 3 31 10 1.26 0.00
 3 31 11 2.90 0.00
 3 31 12 6.13 0.00
 3 31 13 0.66 0.00
 3 31 14 2.34 0.00
 3 31 15 0.42 0.00
 3 33 0 -1.62 0.00
 3 33 1 -6.37 0.00
 3 33 2 -0.34 0.00
 3 33 3 3.59 0.00
 3 33 4 -3.07 0.00
 3 33 5 -2.36 0.00
 3 33 6 -2.76 0.00
 3 33 7 0.95 0.00
 3 33 8 -2.77 0.00
 3 33 9 -2.56 0.00
 3 33 10 0.61 0.00
 3 33 11 1.82 0.00
 3 33 12 -2.04 0.00
 3 33 13 -0.84 0.00
 3 33 14 1.75 0.00
 3 35 0 3.69 0.00
 3 35 1 -3.37 0.00
 3 35 2 1.57 0.00
 3 35 3 5.33 0.00
 3 35 4 -5.38 0.00
 3 35 5 2.58 0.00
 3 35 6 -0.96 0.00
 3 35 7 -6.11 0.00
 3 35 8 -0.46 0.00
 3 35 9 0.09 0.00
 3 35 10 3.24 0.00
 3 35 11 -0.05 0.00
 3 35 12 -1.49 0.00
 3 35 13 -3.24 0.00
 3 37 0 -12.40 0.00
 3 37 1 9.09 0.00
 3 37 2 6.13 0.00
 3 37 3 5.83 0.00
 3 37 4 0.39 0.00
 3 37 5 -4.14 0.00
 3 37 6 -1.40 0.00
 3 37 7 -0.72 0.00
 3 37 8 -3.56 0.00
 3 37 9 -0.07 0.00
 3 37 10 1.96 0.00
 3 37 11 0.64 0.00
 3 37 12 -1.03 0.00
 3 37 13 5.76 0.00
 3 39 0 -1.59 0.00
 3 39 1 0.45 0.00
 3 39 2 0.11 0.00
 3 39 3 -0.66 0.00
 3 39 4 1.81 0.00
 3 39 5 -2.50 0.00
 3 39 6 1.92 0.00
 3 39 7 -5.74 0.00
 3 39 8 0.37 0.00
 3 39 9 -0.43 0.00
 3 39 10 0.00 0.00
 3 39 11 -2.13 0.00
 3 39 12 -1.70 0.00
 3 41 0 -4.84 0.00
 3 41 1 -0.50 0.00
 3 41 2 -2.55 0.00
 3 41 3 -1.87 0.00
 3 41 4 0.79 0.00
 3 41 5 1.53 0.00
 3 41 6 -0.07 0.00
 3 41 7 0.16 0.00
 3 41 8 0.20 0.00
 3 41 9 2.10 0.00
 3 41 10 0.13 0.00
 3 43 0 0.15 0.00
 3 43 1 1.39 0.00
 3 43 2 -3.18 0.00
 3 43 3 5.15 0.00
 3 43 4 -4.59 0.00
 3 43 5 3.10 0.00
 3 43 6 0.52 0.00
 3 43 7 2.04 0.00
 3 43 8 -3.29 0.00
 3 43 9 3.32 0.00
 3 45 0 6.77 0.00
 3 45 1 0.16 0.00
 3 45 2 3.79 0.00
 3 45 3 -0.38 0.00
 3 45 4 3.17 0.00
 3 45 5 1.36 0.00
 3 45 6 6.88 0.00
 3 45 7 -0.45 0.00
 3 47 1 -4.20 0.00
 3 47 2 -2.38 0.00
 3 47 3 -0.92 0.00
 3 47 4 0.95 0.00
 3 47 5 -2.22 0.00
 4 0 0 585.26 0.00
 4 0 1 57.27 0.00
 4 0 2 -274.90 0.00
 4 0 3 -11.07 0.00
 4 0 4 -55.89 0.00
 4 0 5 -25.83 0.00
 4 0 6 -59.63 0.00
 4 0 7 2.73 0.00
 4 0 8 -13.66 0.00
 4 0 9 -6.37 0.00
 4 0 10 -11.77 0.00
 4 0 11 -5.27 0.00
 4 0 12 -8.36 0.00
 4 0 13 -1.17 0.00
 4 0 14 -13.65 0.00
 4 0 15 5.61 0.00
 4 0 16 2.87 0.00
 4 0 17 0.43 0.00
 4 0 18 -6.18 0.00
 4 0 19 0.62 0.00
 4 2 0 19.17 0.00
 4 2 1 -15.62 0.00
 4 2 2 26.11 0.00
 4 2 3 10.51 0.00
 4 2 4 25.92 0.00
 4 2 5 -38.61 0.00
 4 2 6 -8.75 0.00
 4 2 7 12.31 0.00
 4 2 8 2.50 0.00
 4 2 9 -0.54 0.00
 4 2 10 3.84 0.00
 4 2 11 2.23 0.00
 4 2 12 2.54 0.00
 4 2 13 1.72 0.00
 4 2 14 -3.56 0.00
 4 2 15 -0.32 0.00
 4 2 16 7.51 0.00
 4 2 17 -3.83 0.00
 4 2 18 2.17 0.00
 4 2 19 -2.43 0.00
 4 4 0 120.24 0.00
 4 4 1 28.62 0.00
 4 4 2 42.34 0.00
 4 4 3 -30.81 0.00
 4 4 4 49.13 0.00
 4 4 5 -40.36 0.00
 4 4 6 16.06 0.00
 4 4 7 4.81 0.00
 4 4 8 -1.42 0.00
 4 4 9 -6.63 0.00
 4 4 10 26.08 0.00
 4 4 11 1.69 0.00
 4 4 12 1.10 0.00
 4 4 13 3.33 0.00
 4 4 14 -0.07 0.00
 4 4 15 2.11 0.00
 4 4 16 0.33 0.00
 4 4 17 -3.25 0.00
 4 4 18 5.61 0.00
 4 4 19 -5.08 0.00
 4 6 0 -97.16 0.00
 4 6 1 84.43 0.00
 4 6 2 -9.13 0.00
 4 6 3 -51.04 0.00
 4 6 4 -34.43 0.00
 4 6 5 -21.41 0.00
 4 6 6 -11.87 0.00
 4 6 7 14.46 0.00
 4 6 8 -11.35 0.00
 4 6 9 0.94 0.00
 4 6 10 11.07 0.00
 4 6 11 -4.54 0.00
 4 6 12 -1.72 0.00
 4 6 13 6.45 0.00
 4 6 14 2.17 0.00
 4 6 15 0.31 0.00
 4 6 16 -2.54 0.00
 4 6 17 2.57 0.00
 4 6 18 -1.80 0.00
 4 6 19 4.20 0.00
 4 8 0 -39.05 0.00
 4 8 1 -21.70 0.00
 4 8 2 -33.11 0.00
 4 8 3 -27.05 0.00
 4 8 4 10.65 0.00
 4 8 5 30.44 0.00
 4 8 6 4.89 0.00
 4 8 7 0.38 0.00
 4 8 8 1.42 0.00
 4 8 9 16.36 0.00
 4 8 10 -4.91 0.00
 4 8 11 -2.98 0.00
 4 8 12 -4.85 0.00
 4 8 13 2.67 0.00
 4 8 14 4.38 0.00
 4 8 15 -5.67 0.00
 4 8 16 1.53 0.00
 4 8 17 2.38 0.00
 4 8 18 3.33 0.00
 4 8 19 1.19 0.00
 4 10 0 27.13 0.00
 4 10 1 12.39 0.00
 4 10 2 3.74 0.00
 4 10 3 -25.57 0.00
 4 10 4 22.85 0.00
 4 10 5 -6.14 0.00
 4 10 6 -2.92 0.00
 4 10 7 -16.51 0.00
 4 10 8 4.58 0.00
 4 10 9 6.25 0.00
 4 10 10 -3.02 0.00
 4 10 11 -11.14 0.00
 4 10 12 -3.73 0.00
 4 10 13 0.28 0.00
 4 10 14 5.91 0.00
 4 10 15 -0.73 0.00
 4 10 16 0.94 0.00
 4 10 17 2.56 0.00
 4 10 18 3.52 0.00
 4 10 19 2.52 0.00
 4 12 0 0.57 0.00
 4 12 1 -23.82 0.00
 4 12 2 43.70 0.00
 4 12 3 8.85 0.00
 4 12 4 10.42 0.00
 4 12 5 13.80 0.00
 4 12 6 -6.66 0.00
 4 12 7 6.55 0.00
 4 12 8 2.11 0.00
 4 12 9 -3.13 0.00
 4 12 10 -0.31 0.00
 4 12 11 -4.95 0.00
 4 12 12 -3.37 0.00
 4 12 13 0.38 0.00
 4 12 14 4.73 0.00
 4 12 15 -1.44 0.00
 4 12 16 -3.83 0.00
 4 12 17 -0.16 0.00
 4 12 18 -0.30 0.00
 4 12 19 -0.24 0.00
 4 14 0 -12.18 0.00
 4 14 1 1.22 0.00
 4 14 2 -55.95 0.00
 4 14 3 4.92 0.00
 4 14 4 -5.59 0.00
 4 14 5 5.18 0.00
 4 14 6 -16.89 0.00
 4 14 7 15.42 0.00
 4 14 8 -8.39 0.00
 4 14 9 1.79 0.00
 4 14 10 -1.05 0.00
 4 14 11 4.09 0.00
 4 14 12 -6.10 0.00
 4 14 13 1.87 0.00
 4 14 14 -6.36 0.00
 4 14 15 0.97 0.00
 4 14 16 -2.39 0.00
 4 14 17 -5.87 0.00
 4 14 18 2.93 0.00
 4 16 0 14.67 0.00
 4 16 1 -7.71 0.00
 4 16 2 11.50 0.00
 4 16 3 2.38 0.00
 4 16 4 8.33 0.00
 4 16 5 -3.99 0.00
 4 16 6 -12.67 0.00
 4 16 7 12.87 0.00
 4 16 8 7.41 0.00
 4 16 9 -5.87 0.00
 4 16 10 0.62 0.00
 4 16 11 -1.68 0.00
 4 16 12 2.47 0.00
 4 16 13 -0.83 0.00
 4 16 14 -5.93 0.00
 4 16 15 5.22 0.00
 4 16 16 -0.97 0.00
 4 16 17 -1.51 0.00
 4 16 18 -1.23 0.00
 4 18 0 31.05 0.00
 4 18 1 13.55 0.00
 4 18 2 -5.70 0.00
 4 18 3 0.59 0.00
 4 18 4 27.28 0.00
 4 18 5 1.15 0.00
 4 18 6 9.70 0.00
 4 18 7 3.10 0.00
 4 18 8 11.87 0.00
 4 18 9 2.42 0.00
 4 18 10 4.10 0.00
 4 18 11 2.38 0.00
 4 18 12 9.14 0.00
 4 18 13 -2.18 0.00
 4 18 14 -3.40 0.00
 4 18 15 3.70 0.00
 4 18 16 2.44 0.00
 4 18 17 0.73 0.00
 4 18 18 1.22 0.00
 4 20 0 -6.70 0.00
 4 20 1 4.48 0.00
 4 20 2 1.66 0.00
 4 20 3 -6.65 0.00
 4 20 4 -17.74 0.00
 4 20 5 -8.42 0.00
 4 20 6 -0.96 0.00
 4 20 7 -16.67 0.00
 4 20 8 3.46 0.00
 4 20 9 -3.59 0.00
 4 20 10 -4.13 0.00
 4 20 11 0.25 0.00
 4 20 12 -2.52 0.00
 4 20 13 -1.13 0.00
 4 20 14 -3.88 0.00
 4 20 15 -1.36 0.00
 4 20 16 -1.84 0.00
 4 20 17 -3.10 0.00
 4 22 0 -0.68 0.00
 4 22 1 -1.31 0.00
 4 22 2 9.06 0.00
 4 22 3 -7.41 0.00
 4 22 4 -10.83 0.00
 4 22 5 1.10 0.00
 4 22 6 -10.63 0.00
 4 22 7 -8.18 0.00
 4 22 8 -12.78 0.00
 4 22 9 -1.09 0.00
 4 22 10 -2.96 0.00
 4 22 11 -4.01 0.00
 4 22 12 -4.43 0.00
 4 22 13 4.05 0.00
 4 22 14 5.14 0.00
 4 22 15 -6.21 0.00
 4 22 16 -1.37 0.00
 4 22 17 1.97 0.00
 4 24 0 6.15 0.00
 4 24 1 0.10 0.00
 4 24 2 26.52 0.00
 4 24 3 7.13 0.00
 4 24 4 -8.05 0.00
 4 24 5 5.27 0.00
 4 24 6 9.24 0.00
 4 24 7 -0.27 0.00
 4 24 8 1.95 0.00
 4 24 9 4.56 0.00
 4 24 10 11.11 0.00
 4 24 11 1.05 0.00
 4 24 12 3.83 0.00
 4 24 13 3.28 0.00
 4 24 14 5.05 0.00
 4 24 15 -2.41 0.00
 4 24 16 1.83 0.00
 4 24 17 8.15 0.00
 4 26 0 -6.61 0.00
 4 26 1 4.35 0.00
 4 26 2 -6.00 0.00
 4 26 3 1.96 0.00
 4 26 4 -5.67 0.00
 4 26 5 9.68 0.00
 4 26 6 -3.26 0.00
 4 26 7 1.97 0.00
 4 26 8 -1.61 0.00
 4 26 9 0.38 0.00
 4 26 10 1.14 0.00
 4 26 11 -2.58 0.00
 4 26 12 3.22 0.00
 4 26 13 1.47 0.00
 4 26 14 -7.88 0.00
 4 26 15 2.73 0.00
 4 26 16 5.80 0.00
 4 28 0 -4.36 0.00
 4 28 1 -4.41 0.00
 4 28 2 -5.90 0.00
 4 28 3 -3.07 0.00
 4 28 4 -3.80 0.00
 4 28 5 0.85 0.00
 4 28 6 -4.32 0.00
 4 28 7 -3.36 0.00
 4 28 8 0.58 0.00
 4 28 9 -0.28 0.00
 4 28 10 -7.77 0.00
 4 28 11 -7.96 0.00
 4 28 12 5.47 0.00
 4 28 13 1.07 0.00
 4 28 14 -4.21 0.00
 4 28 15 -3.70 0.00
 4 28 16 8.13 0.00
 4 30 0 4.14 0.00
 4 30 1 -4.19 0.00
 4 30 2 -3.80 0.00
 4 30 3 -1.01 0.00
 4 30 4 3.67 0.00
 4 30 5 1.82 0.00
 4 30 6 -1.04 0.00
 4 30 7 1.29 0.00
 4 30 8 7.21 0.00
 4 30 9 1.86 0.00
 4 30 10 2.47 0.00
 4 30 11 -1.65 0.00
 4 30 12 4.81 0.00
 4 30 13 -0.57 0.00
 4 30 14 0.64 0.00
 4 30 15 -0.15 0.00
 4 32 0 -1.59 0.00
 4 32 1 -0.02 0.00
 4 32 2 -1.61 0.00
 4 32 3 5.03 0.00
 4 32 4 -3.29 0.00
 4 32 5 5.56 0.00
 4 32 6 3.32 0.00
 4 32 7 6.11 0.00
 4 32 8 -2.31 0.00
 4 32 9 2.29 0.00
 4 32 10 -0.39 0.00
 4 32 11 2.71 0.00
 4 32 12 -0.30 0.00
 4 32 13 0.22 0.00
 4 32 14 -2.28 0.00
 4 34 0 -1.45 0.00
 4 34 1 -5.53 0.00
 4 34 2 -1.08 0.00
 4 34 3 5.14 0.00
 4 34 4 -1.59 0.00
 4 34 5 -1.41 0.00
 4 34 6 -1.70 0.00
 4 34 7 2.46 0.00
 4 34 8 2.38 0.00
 4 34 9 -1.49 0.00
 4 34 10 0.29 0.00
 4 34 11 3.12 0.00
 4 34 12 -4.60 0.00
 4 34 13 -2.18 0.00
 4 34 14 1.08 0.00
 4 36 0 -8.59 0.00
 4 36 1 3.19 0.00
 4 36 2 -3.34 0.00
 4 36 3 -3.92 0.00
 4 36 4 -1.00 0.00
 4 36 5 -0.05 0.00
 4 36 6 3.07 0.00
 4 36 7 -2.93 0.00
 4 36 8 -1.09 0.00
 4 36 9 -3.06 0.00
 4 36 10 -1.79 0.00
 4 36 11 0.03 0.00
 4 36 12 -2.59 0.00
 4 36 13 2.31 0.00
 4 38 0 2.36 0.00
 4 38 1 -1.51 0.00
 4 38 2 4.54 0.00
 4 38 3 -4.36 0.00
 4 38 4 -0.50 0.00
 4 38 5 0.04 0.00
 4 38 6 0.61 0.00
 4 38 7 -0.38 0.00
 4 38 8 2.07 0.00
 4 38 9 -1.05 0.00
 4 38 10 -2.75 0.00
 4 38 11 2.34 0.00
 4 38 12 7.92 0.00
 4 40 0 -3.55 0.00
 4 40 1 -0.91 0.00
 4 40 2 -5.15 0.00
 4 40 3 -4.97 0.00
 4 40 4 -2.79 0.00
 4 40 5 -0.78 0.00
 4 40 6 -3.26 0.00
 4 40 7 -1.00 0.00
 4 40 8 1.15 0.00
 4 40 9 0.70 0.00
 4 40 10 2.02 0.00
 4 40 11 -2.63 0.00
 4 42 0 2.50 0.00
 4 42 1 -0.65 0.00
 4 42 2 1.39 0.00
 4 42 3 2.15 0.00
 4 42 4 1.71 0.00
 4 42 5 -0.63 0.00
 4 42 6 3.75 0.00
 4 42 7 -2.09 0.00
 4 42 8 2.22 0.00
 4 42 9 0.88 0.00
 4 42 10 -4.29 0.00
 4 44 0 8.09 0.00
 4 44 1 1.66 0.00
 4 44 2 5.37 0.00
 4 44 3 1.19 0.00
 4 44 4 1.07 0.00
 4 44 5 -1.23 0.00
 4 44 6 2.77 0.00
 4 44 7 -2.85 0.00
 4 44 8 -4.39 0.00
 4 46 0 -3.41 0.00
 4 46 1 1.34 0.00
 4 46 2 -1.73 0.00
 4 46 3 -0.80 0.00
 4 46 4 -5.70 0.00
 4 46 5 -0.22 0.00
 4 46 6 -4.08 0.00
 4 48 1 -3.67 0.00
 4 48 2 -0.07 0.00
 4 48 3 1.12 0.00
 5 1 0 71.82 0.00
 5 1 1 122.93 0.00
 5 1 2 3.09 0.00
 5 1 3 98.60 0.00
 5 1 4 15.16 0.00
 5 1 5 -24.14 0.00
 5 1 6 -0.48 0.00
 5 1 7 19.38 0.00
 5 1 8 -5.22 0.00
 5 1 9 -21.73 0.00
 5 1 10 0.07 0.00
 5 1 11 -1.61 0.00
 5 1 12 0.59 0.00
 5 1 13 -0.39 0.00
 5 1 14 -5.81 0.00
 5 1 15 1.13 0.00
 5 1 16 5.28 0.00
 5 1 17 -7.41 0.00
 5 1 18 2.45 0.00
 5 1 19 -0.72 0.00
 5 3 0 27.43 0.00
 5 3 1 22.14 0.00
 5 3 2 -48.46 0.00
 5 3 3 -49.66 0.00
 5 3 4 22.58 0.00
 5 3 5 -3.31 0.00
 5 3 6 -13.21 0.00
 5 3 7 56.24 0.00
 5 3 8 15.55 0.00
 5 3 9 -4.32 0.00
 5 3 10 7.03 0.00
 5 3 11 -7.90 0.00
 5 3 12 5.62 0.00
 5 3 13 6.99 0.00
 5 3 14 -4.50 0.00
 5 3 15 2.21 0.00
 5 3 16 -1.78 0.00
 5 3 17 -2.66 0.00
 5 3 18 2.68 0.00
 5 3 19 0.02 0.00
 5 5 0 72.35 0.00
 5 5 1 -92.91 0.00
 5 5 2 -26.51 0.00
 5 5 3 -100.43 0.00
 5 5 4 -8.03 0.00
 5 5 5 -15.28 0.00
 5 5 6 -22.75 0.00
 5 5 7 15.05 0.00
 5 5 8 -24.47 0.00
 5 5 9 0.44 0.00
 5 5 10 -0.03 0.00
 5 5 11 -7.50 0.00
 5 5 12 -3.62 0.00
 5 5 13 11.62 0.00
 5 5 14 -4.39 0.00
 5 5 15 0.90 0.00
 5 5 16 0.94 0.00
 5 5 17 -1.90 0.00
 5 5 18 3.48 0.00
 5 5 19 -2.65 0.00
 5 7 0 -131.21 0.00
 5 7 1 13.54 0.00
 5 7 2 0.67 0.00
 5 7 3 31.47 0.00
 5 7 4 -54.86 0.00
 5 7 5 18.46 0.00
 5 7 6 -4.28 0.00
 5 7 7 9.71 0.00
 5 7 8 -11.68 0.00
 5 7 9 6.19 0.00
 5 7 10 4.27 0.00
 5 7 11 -10.19 0.00
 5 7 12 2.21 0.00
 5 7 13 6.38 0.00
 5 7 14 0.79 0.00
 5 7 15 -2.21 0.00
 5 7 16 -2.34 0.00
 5 7 17 -2.57 0.00
 5 7 18 5.45 0.00
 5 7 19 -3.18 0.00
 5 9 0 -34.78 0.00
 5 9 1 -35.76 0.00
 5 9 2 -6.01 0.00
 5 9 3 -25.13 0.00
 5 9 4 -9.82 0.00
 5 9 5 -5.22 0.00
 5 9 6 28.14 0.00
 5 9 7 -6.42 0.00
 5 9 8 1.51 0.00
 5 9 9 1.55 0.00
 5 9 10 12.68 0.00
 5 9 11 -6.23 0.00
 5 9 12 2.76 0.00
 5 9 13 -1.49 0.00
 5 9 14 4.11 0.00
 5 9 15 -1.96 0.00
 5 9 16 -0.06 0.00
 5 9 17 0.95 0.00
 5 9 18 -1.38 0.00
 5 9 19 5.14 0.00
 5 11 0 -18.08 0.00
 5 11 1 21.82 0.00
 5 11 2 16.00 0.00
 5 11 3 -12.70 0.00
 5 11 4 30.20 0.00
 5 11 5 1.05 0.00
 5 11 6 18.67 0.00
 5 11 7 18.99 0.00
 5 11 8 2.97 0.00
 5 11 9 -0.60 0.00
 5 11 10 -3.83 0.00
 5 11 11 7.91 0.00
 5 11 12 -4.42 0.00
 5 11 13 -0.38 0.00
 5 11 14 -5.52 0.00
 5 11 15 -1.44 0.00
 5 11 16 0.62 0.00
 5 11 17 2.51 0.00
 5 11 18 -0.15 0.00
 5 11 19 1.74 0.00
 5 13 0 -1.45 0.00
 5 13 1 3.58 0.00
 5 13 2 -21.78 0.00
 5 13 3 -5.61 0.00
 5 13 4 32.40 0.00
 5 13 5 12.19 0.00
 5 13 6 -0.64 0.00
 5 13 7 9.97 0.00
 5 13 8 10.23 0.00
 5 13 9 -4.40 0.00
 5 13 10 1.34 0.00
 5 13 11 -6.66 0.00
 5 13 12 -2.41 0.00
 5 13 13 -2.97 0.00
 5 13 14 -7.42 0.00
 5 13 15 2.16 0.00
 5 13 16 -1.79 0.00
 5 13 17 4.25 0.00
 5 13 18 -0.18 0.00
 5 15 0 -5.39 0.00
 5 15 1 2.68 0.00
 5 15 2 -11.67 0.00
 5 15 3 1.75 0.00
 5 15 4 5.36 0.00
 5 15 5 9.50 0.00
 5 15 6 -14.35 0.00
 5 15 7 22.64 0.00
 5 15 8 -1.47 0.00
 5 15 9 2.48 0.00
 5 15 10 -2.09 0.00
 5 15 11 -7.27 0.00
 5 15 12 1.21 0.00
 5 15 13 -2.84 0.00
 5 15 14 -5.79 0.00
 5 15 15 1.87 0.00
 5 15 16 -2.01 0.00
 5 15 17 -5.27 0.00
 5 15 18 4.21 0.00
 5 17 0 14.02 0.00
 5 17 1 13.36 0.00
 5 17 2 3.18 0.00
 5 17 3 25.52 0.00
 5 17 4 22.53 0.00
 5 17 5 -0.25 0.00
 5 17 6 -2.53 0.00
 5 17 7 6.95 0.00
 5 17 8 -2.74 0.00
 5 17 9 -1.94 0.00
 5 17 10 3.55 0.00
 5 17 11 0.26 0.00
 5 17 12 4.91 0.00
 5 17 13 2.72 0.00
 5 17 14 -6.82 0.00
 5 17 15 2.32 0.00
 5 17 16 0.27 0.00
 5 17 17 -2.76 0.00
 5 17 18 4.91 0.00
 5 19 0 23.11 0.00
 5 19 1 -6.53 0.00
 5 19 2 25.91 0.00
 5 19 3 -5.30 0.00
 5 19 4 -10.69 0.00
 5 19 5 -1.31 0.00
 5 19 6 -5.88 0.00
 5 19 7 3.22 0.00
 5 19 8 -2.00 0.00
 5 19 9 -0.84 0.00
 5 19 10 6.35 0.00
 5 19 11 0.66 0.00
 5 19 12 -1.51 0.00
 5 19 13 0.73 0.00
 5 19 14 4.49 0.00
 5 19 15 0.91 0.00
 5 19 16 -4.27 0.00
 5 19 17 -0.47 0.00
 5 19 18 -1.81 0.00
 5 21 0 -26.89 0.00
 5 21 1 -12.01 0.00
 5 21 2 9.08 0.00
 5 21 3 -11.42 0.00
 5 21 4 -12.49 0.00
 5 21 5 -14.71 0.00
 5 21 6 -8.55 0.00
 5 21 7 -14.80 0.00
 5 21 8 -7.52 0.00
 5 21 9 -0.54 0.00
 5 21 10 -1.71 0.00
 5 21 11 11.49 0.00
 5 21 12 -7.70 0.00
 5 21 13 -2.20 0.00
 5 21 14 -1.60 0.00
 5 21 15 -3.02 0.00
 5 21 16 0.04 0.00
 5 21 17 2.79 0.00
 5 23 0 7.10 0.00
 5 23 1 11.56 0.00
 5 23 2 10.32 0.00
 5 23 3 -4.50 0.00
 5 23 4 -6.37 0.00
 5 23 5 8.74 0.00
 5 23 6 -3.13 0.00
 5 23 7 -6.81 0.00
 5 23 8 6.38 0.00
 5 23 9 -3.39 0.00
 5 23 10 4.79 0.00
 5 23 11 -1.67 0.00
 5 23 12 1.18 0.00
 5 23 13 2.85 0.00
 5 23 14 -2.70 0.00
 5 23 15 -2.50 0.00
 5 23 16 1.69 0.00
 5 23 17 5.77 0.00
 5 25 0 -4.60 0.00
 5 25 1 1.48 0.00
 5 25 2 15.23 0.00
 5 25 3 -8.42 0.00
 5 25 4 2.57 0.00
 5 25 5 -1.15 0.00
 5 25 6 5.49 0.00
 5 25 7 -2.30 0.00
 5 25 8 5.28 0.00
 5 25 9 5.73 0.00
 5 25 10 6.49 0.00
 5 25 11 -10.22 0.00
 5 25 12 4.67 0.00
 5 25 13 1.85 0.00
 5 25 14 -1.53 0.00
 5 25 15 -0.75 0.00
 5 25 16 2.51 0.00
 5 27 0 -5.89 0.00
 5 27 1 -11.47 0.00
 5 27 2 -5.32 0.00
 5 27 3 -13.71 0.00
 5 27 4 -5.52 0.00
 5 27 5 -3.99 0.00
 5 27 6 -8.65 0.00
 5 27 7 -10.50 0.00
 5 27 8 -8.03 0.00
 5 27 9 -1.63 0.00
 5 27 10 -1.32 0.00
 5 27 11 -4.84 0.00
 5 27 12 2.30 0.00
 5 27 13 3.59 0.00
 5 27 14 -9.16 0.00
 5 27 15 2.31 0.00
 5 27 16 3.57 0.00
 5 29 0 -10.14 0.00
 5 29 1 -1.10 0.00
 5 29 2 -0.78 0.00
 5 29 3 2.77 0.00
 5 29 4 2.33 0.00
 5 29 5 7.08 0.00
 5 29 6 -3.57 0.00
 5 29 7 8.82 0.00
 5 29 8 0.78 0.00
 5 29 9 7.03 0.00
 5 29 10 -2.77 0.00
 5 29 11 2.82 0.00
 5 29 12 2.51 0.00
 5 29 13 0.29 0.00
 5 29 14 -1.12 0.00
 5 29 15 8.44 0.00
 5 31 0 12.45 0.00
 5 31 1 1.03 0.00
 5 31 2 -0.85 0.00
 5 31 3 2.98 0.00
 5 31 4 14.88 0.00
 5 31 5 5.38 0.00
 5 31 6 8.50 0.00
 5 31 7 4.39 0.00
 5 31 8 12.22 0.00
 5 31 9 0.82 0.00
 5 31 10 0.26 0.00
 5 31 11 2.13 0.00
 5 31 12 7.66 0.00
 5 31 13 -4.44 0.00
 5 31 14 4.86 0.00
 5 31 15 0.84 0.00
 5 33 0 -5.61 0.00
 5 33 1 1.53 0.00
 5 33 2 -3.86 0.00
 5 33 3 -0.21 0.00
 5 33 4 3.58 0.00
 5 33 5 -0.65 0.00
 5 33 6 -0.20 0.00
 5 33 7 1.33 0.00
 5 33 8 0.70 0.00
 5 33 9 -3.67 0.00
 5 33 10 -6.05 0.00
 5 33 11 4.84 0.00
 5 33 12 -4.47 0.00
 5 33 13 -2.74 0.00
 5 33 14 0.64 0.00
 5 35 0 -1.82 0.00
 5 35 1 4.54 0.00
 5 35 2 -5.51 0.00
 5 35 3 -4.42 0.00
 5 35 4 -1.77 0.00
 5 35 5 -1.44 0.00
 5 35 6 2.34 0.00
 5 35 7 -5.01 0.00
 5 35 8 -0.72 0.00
 5 35 9 4.02 0.00
 5 35 10 -3.59 0.00
 5 35 11 1.35 0.00
 5 35 12 -2.53 0.00
 5 35 13 -5.52 0.00
 5 37 0 0.50 0.00
 5 37 1 3.28 0.00
 5 37 2 3.95 0.00
 5 37 3 2.07 0.00
 5 37 4 -1.96 0.00
 5 37 5 1.57 0.00
 5 37 6 -2.08 0.00
 5 37 7 5.27 0.00
 5 37 8 -1.08 0.00
 5 37 9 -2.99 0.00
 5 37 10 -0.44 0.00
 5 37 11 1.84 0.00
 5 37 12 2.64 0.00
 5 39 0 0.62 0.00
 5 39 1 -7.06 0.00
 5 39 2 -1.68 0.00
 5 39 3 -6.91 0.00
 5 39 4 -2.66 0.00
 5 39 5 -1.39 0.00
 5 39 6 -2.27 0.00
 5 39 7 0.43 0.00
 5 39 8 -0.77 0.00
 5 39 9 1.54 0.00
 5 39 10 -2.22 0.00
 5 39 11 -0.92 0.00
 5 41 0 2.52 0.00
 5 41 1 -2.00 0.00
 5 41 2 1.06 0.00
 5 41 3 -3.47 0.00
 5 41 4 2.40 0.00
 5 41 5 0.62 0.00
 5 41 6 -2.73 0.00
 5 41 7 -0.27 0.00
 5 41 8 -0.21 0.00
 5 41 9 -2.66 0.00
 5 41 10 -1.72 0.00
 5 43 0 -1.26 0.00
 5 43 1 3.29 0.00
 5 43 2 -1.06 0.00
 5 43 3 2.81 0.00
 5 43 4 -5.66 0.00
 5 43 5 0.65 0.00
 5 43 6 1.76 0.00
 5 43 7 2.40 0.00
 5 43 8 0.14 0.00
 5 43 9 -2.93 0.00
 5 45 0 6.14 0.00
 5 45 1 0.23 0.00
 5 45 2 3.63 0.00
 5 45 3 -0.18 0.00
 5 45 4 4.05 0.00
 5 45 5 -4.10 0.00
 5 45 6 3.07 0.00
 5 45 7 -2.16 0.00
 5 47 1 2.79 0.00
 5 47 2 -0.09 0.00
 5 47 3 0.82 0.00
 5 47 4 -0.36 0.00
 5 47 5 -0.97 0.00
 6 0 0 111.66 0.00
 6 0 1 7.16 0.00
 6 0 2 -84.94 0.00
 6 0 3 -3.74 0.00
 6 0 4 96.97 0.00
 6 0 5 16.13 0.00
 6 0 6 17.61 0.00
 6 0 7 -4.87 0.00
 6 0 8 17.46 0.00
 6 0 9 0.44 0.00
 6 0 10 17.67 0.00
 6 0 11 -6.97 0.00
 6 0 12 6.45 0.00
 6 0 13 -6.34 0.00
 6 0 14 -2.96 0.00
 6 0 15 1.97 0.00
 6 0 16 5.67 0.00
 6 0 17 -6.71 0.00
 6 0 18 -2.42 0.00
 6 0 19 -1.38 0.00
 6 2 0 -96.14 0.00
 6 2 1 -9.89 0.00
 6 2 2 92.48 0.00
 6 2 3 -14.29 0.00
 6 2 4 86.25 0.00
 6 2 5 5.63 0.00
 6 2 6 -0.39 0.00
 6 2 7 1.94 0.00
 6 2 8 -4.64 0.00
 6 2 9 6.74 0.00
 6 2 10 10.50 0.00
 6 2 11 4.27 0.00
 6 2 12 1.67 0.00
 6 2 13 0.66 0.00
 6 2 14 -6.58 0.00
 6 2 15 3.90 0.00
 6 2 16 1.21 0.00
 6 2 17 -6.58 0.00
 6 2 18 2.16 0.00
 6 2 19 -0.41 0.00
 6 4 0 -153.62 0.00
 6 4 1 -25.41 0.00
 6 4 2 9.38 0.00
 6 4 3 21.30 0.00
 6 4 4 -11.21 0.00
 6 4 5 12.63 0.00
 6 4 6 -24.53 0.00
 6 4 7 11.52 0.00
 6 4 8 -45.64 0.00
 6 4 9 0.12 0.00
 6 4 10 13.75 0.00
 6 4 11 1.69 0.00
 6 4 12 -7.33 0.00
 6 4 13 2.72 0.00
 6 4 14 -8.66 0.00
 6 4 15 4.66 0.00
 6 4 16 -4.32 0.00
 6 4 17 -3.78 0.00
 6 4 18 3.71 0.00
 6 4 19 -4.16 0.00
 6 6 0 -0.07 0.00
 6 6 1 19.08 0.00
 6 6 2 33.64 0.00
 6 6 3 0.44 0.00
 6 6 4 -25.47 0.00
 6 6 5 6.38 0.00
 6 6 6 -16.54 0.00
 6 6 7 1.64 0.00
 6 6 8 -33.76 0.00
 6 6 9 -11.01 0.00
 6 6 10 11.46 0.00
 6 6 11 -17.83 0.00
 6 6 12 -1.95 0.00
 6 6 13 -0.37 0.00
 6 6 14 -1.72 0.00
 6 6 15 3.19 0.00
 6 6 16 0.81 0.00
 6 6 17 1.65 0.00
 6 6 18 0.73 0.00
 6 6 19 0.90 0.00
 6 8 0 -2.67 0.00
 6 8 1 -72.94 0.00
 6 8 2 8.00 0.00
 6 8 3 -9.94 0.00
 6 8 4 -1.53 0.00
 6 8 5 20.67 0.00
 6 8 6 14.78 0.00
 6 8 7 -12.17 0.00
 6 8 8 -3.65 0.00
 6 8 9 2.35 0.00
 6 8 10 9.31 0.00
 6 8 11 -5.74 0.00
 6 8 12 6.07 0.00
 6 8 13 1.11 0.00
 6 8 14 -2.90 0.00
 6 8 15 -2.16 0.00
 6 8 16 1.54 0.00
 6 8 17 -0.23 0.00
 6 8 18 2.55 0.00
 6 8 19 -7.83 0.00
 6 10 0 9.96 0.00
 6 10 1 -7.74 0.00
 6 10 2 -48.87 0.00
 6 10 3 -25.27 0.00
 6 10 4 -7.96 0.00
 6 10 5 -27.64 0.00
 6 10 6 -3.41 0.00
 6 10 7 -31.35 0.00
 6 10 8 5.84 0.00
 6 10 9 6.37 0.00
 6 10 10 1.25 0.00
 6 10 11 -1.42 0.00
 6 10 12 4.31 0.00
 6 10 13 5.01 0.00
 6 10 14 -3.70 0.00
 6 10 15 3.32 0.00
 6 10 16 -1.19 0.00
 6 10 17 1.27 0.00
 6 10 18 3.17 0.00
 6 10 19 0.59 0.00
 6 12 0 -3.18 0.00
 6 12 1 8.61 0.00
 6 12 2 25.76 0.00
 6 12 3 11.81 0.00
 6 12 4 9.84 0.00
 6 12 5 7.45 0.00
 6 12 6 11.47 0.00
 6 12 7 3.12 0.00
 6 12 8 0.13 0.00
 6 12 9 3.23 0.00
 6 12 10 1.97 0.00
 6 12 11 0.71 0.00
 6 12 12 2.50 0.00
 6 12 13 2.70 0.00
 6 12 14 -0.80 0.00
 6 12 15 3.71 0.00
 6 12 16 2.06 0.00
 6 12 17 1.31 0.00
 6 12 18 -1.81 0.00
 6 14 0 -0.40 0.00
 6 14 1 17.14 0.00
 6 14 2 -36.87 0.00
 6 14 3 15.55 0.00
 6 14 4 23.99 0.00
 6 14 5 3.59 0.00
 6 14 6 16.16 0.00
 6 14 7 17.58 0.00
 6 14 8 -7.25 0.00
 6 14 9 7.51 0.00
 6 14 10 1.86 0.00
 6 14 11 4.34 0.00
 6 14 12 4.61 0.00
 6 14 13 2.01 0.00
 6 14 14 -5.38 0.00
 6 14 15 1.06 0.00
 6 14 16 1.91 0.00
 6 14 17 -1.21 0.00
 6 14 18 -0.67 0.00
 6 16 0 35.41 0.00
 6 16 1 -16.45 0.00
 6 16 2 17.75 0.00
 6 16 3 -8.67 0.00
 6 16 4 13.12 0.00
 6 16 5 -20.88 0.00
 6 16 6 -1.80 0.00
 6 16 7 -1.27 0.00
 6 16 8 -2.63 0.00
 6 16 9 -13.95 0.00
 6 16 10 6.74 0.00
 6 16 11 -8.76 0.00
 6 16 12 7.46 0.00
 6 16 13 -0.93 0.00
 6 16 14 -1.81 0.00
 6 16 15 2.01 0.00
 6 16 16 0.56 0.00
 6 16 17 -0.66 0.00
 6 16 18 -5.82 0.00
 6 18 0 18.99 0.00
 6 18 1 9.67 0.00
 6 18 2 -8.77 0.00
 6 18 3 1.94 0.00
 6 18 4 17.87 0.00
 6 18 5 -1.17 0.00
 6 18 6 -1.59 0.00
 6 18 7 8.44 0.00
 6 18 8 -12.64 0.00
 6 18 9 0.71 0.00
 6 18 10 -1.62 0.00
 6 18 11 4.38 0.00
 6 18 12 2.42 0.00
 6 18 13 -1.29 0.00
 6 18 14 -2.28 0.00
 6 18 15 -1.74 0.00
 6 18 16 2.94 0.00
 6 18 17 0.51 0.00
 6 18 18 2.57 0.00
 6 20 0 -14.99 0.00
 6 20 1 -4.09 0.00
 6 20 2 -11.33 0.00
 6 20 3 -2.95 0.00
 6 20 4 -16.40 0.00
 6 20 5 2.13 0.00
 6 20 6 -6.14 0.00
 6 20 7 1.72 0.00
 6 20 8 0.20 0.00
 6 20 9 1.54 0.00
 6 20 10 2.40 0.00
 6 20 11 2.12 0.00
 6 20 12 -2.00 0.00
 6 20 13 -5.37 0.00
 6 20 14 -2.23 0.00
 6 20 15 -0.32 0.00
 6 20 16 -2.73 0.00
 6 20 17 0.06 0.00
 6 22 0 -22.58 0.00
 6 22 1 -3.16 0.00
 6 22 2 0.69 0.00
 6 22 3 -0.43 0.00
 6 22 4 -6.27 0.00
 6 22 5 12.01 0.00
 6 22 6 -5.11 0.00
 6 22 7 1.48 0.00
 6 22 8 -6.53 0.00
 6 22 9 -4.26 0.00
 6 22 10 3.34 0.00
 6 22 11 -4.25 0.00
 6 22 12 -3.14 0.00
 6 22 13 1.76 0.00
 6 22 14 1.69 0.00
 6 22 15 -2.34 0.00
 6 22 16 -1.50 0.00
 6 22 17 7.27 0.00
 6 24 0 -4.22 0.00
 6 24 1 10.32 0.00
 6 24 2 10.04 0.00
 6 24 3 6.26 0.00
 6 24 4 -0.53 0.00
 6 24 5 2.27 0.00
 6 24 6 9.14 0.00
 6 24 7 -5.76 0.00
 6 24 8 2.56 0.00
 6 24 9 4.15 0.00
 6 24 10 4.59 0.00
 6 24 11 1.29 0.00
 6 24 12 -2.21 0.00
 6 24 13 2.23 0.00
 6 24 14 3.33 0.00
 6 24 15 -1.43 0.00
 6 24 16 7.23 0.00
 6 26 0 -4.32 0.00
 6 26 1 -4.78 0.00
 6 26 2 2.79 0.00
 6 26 3 -5.52 0.00
 6 26 4 3.83 0.00
 6 26 5 7.93 0.00
 6 26 6 -1.05 0.00
 6 26 7 0.87 0.00
 6 26 8 0.10 0.00
 6 26 9 3.51 0.00
 6 26 10 2.31 0.00
 6 26 11 -1.73 0.00
 6 26 12 2.87 0.00
 6 26 13 6.88 0.00
 6 26 14 -6.92 0.00
 6 26 15 4.34 0.00
 6 26 16 4.51 0.00
 6 28 0 -0.53 0.00
 6 28 1 5.52 0.00
 6 28 2 -3.49 0.00
 6 28 3 -5.59 0.00
 6 28 4 7.06 0.00
 6 28 5 -0.86 0.00
 6 28 6 -4.24 0.00
 6 28 7 -5.78 0.00
 6 28 8 5.30 0.00
 6 28 9 1.01 0.00
 6 28 10 -3.24 0.00
 6 28 11 -5.41 0.00
 6 28 12 6.55 0.00
 6 28 13 0.54 0.00
 6 28 14 -5.29 0.00
 6 28 15 -1.24 0.00
 6 30 0 4.13 0.00
 6 30 1 10.43 0.00
 6 30 2 0.30 0.00
 6 30 3 7.10 0.00
 6 30 4 5.11 0.00
 6 30 5 6.83 0.00
 6 30 6 -4.90 0.00
 6 30 7 4.63 0.00
 6 30 8 7.76 0.00
 6 30 9 4.41 0.00
 6 30 10 -2.18 0.00
 6 30 11 0.90 0.00
 6 30 12 -1.39 0.00
 6 30 13 -0.79 0.00
 6 30 14 -0.34 0.00
 6 30 15 3.63 0.00
 6 32 0 -0.71 0.00
 6 32 1 2.17 0.00
 6 32 2 -4.18 0.00
 6 32 3 -4.85 0.00
 6 32 4 -0.67 0.00
 6 32 5 -5.41 0.00
 6 32 6 -0.45 0.00
 6 32 7 -0.46 0.00
 6 32 8 -1.85 0.00
 6 32 9 -2.88 0.00
 6 32 10 -5.84 0.00
 6 32 11 1.07 0.00
 6 32 12 -0.59 0.00
 6 32 13 -4.00 0.00
 6 32 14 -1.04 0.00
 6 34 0 -2.78 0.00
 6 34 1 -13.95 0.00
 6 34 2 -2.68 0.00
 6 34 3 -3.76 0.00
 6 34 4 -0.54 0.00
 6 34 5 -11.89 0.00
 6 34 6 -0.24 0.00
 6 34 7 -7.06 0.00
 6 34 8 8.03 0.00
 6 34 9 -8.32 0.00
 6 34 10 0.82 0.00
 6 34 11 -2.51 0.00
 6 34 12 -0.31 0.00
 6 34 13 -10.10 0.00
 6 36 0 -0.25 0.00
 6 36 1 6.79 0.00
 6 36 2 0.41 0.00
 6 36 3 4.53 0.00
 6 36 4 -1.26 0.00
 6 36 5 6.43 0.00
 6 36 6 -0.64 0.00
 6 36 7 6.34 0.00
 6 36 8 -1.11 0.00
 6 36 9 4.73 0.00
 6 36 10 0.74 0.00
 6 36 11 1.12 0.00
 6 36 12 -2.07 0.00
 6 38 0 2.65 0.00
 6 38 1 4.13 0.00
 6 38 2 1.91 0.00
 6 38 3 3.91 0.00
 6 38 4 3.60 0.00
 6 38 5 3.33 0.00
 6 38 6 4.65 0.00
 6 38 7 1.09 0.00
 6 38 8 1.86 0.00
 6 38 9 4.61 0.00
 6 38 10 0.20 0.00
 6 38 11 4.64 0.00
 6 38 12 -1.29 0.00
 6 40 0 -1.69 0.00
 6 40 1 1.35 0.00
 6 40 2 -4.75 0.00
 6 40 3 1.09 0.00
 6 40 4 -4.71 0.00
 6 40 5 0.80 0.00
 6 40 6 -9.22 0.00
 6 40 7 0.44 0.00
 6 40 8 -4.47 0.00
 6 40 9 -0.33 0.00
 6 40 10 0.38 0.00
 6 42 0 -0.12 0.00
 6 42 1 -0.61 0.00
 6 42 2 -0.16 0.00
 6 42 3 3.64 0.00
 6 42 4 4.09 0.00
 6 42 5 -2.92 0.00
 6 42 6 -1.76 0.00
 6 42 7 -2.37 0.00
 6 42 8 0.74 0.00
 6 42 9 3.21 0.00
 6 44 0 -1.89 0.00
 6 44 1 -4.07 0.00
 6 44 2 -3.57 0.00
 6 44 3 2.17 0.00
 6 44 4 -0.57 0.00
 6 44 5 -3.34 0.00
 6 44 6 1.83 0.00
 6 44 7 -4.11 0.00
 6 44 8 3.00 0.00
 6 46 0 -2.07 0.00
 6 46 1 1.26 0.00
 6 46 2 -1.21 0.00
 6 46 3 -3.39 0.00
 6 46 4 -3.72 0.00
 6 46 5 -5.57 0.00
 6 46 6 -3.92 0.00
 6 48 2 4.85 0.00
 7 1 0 -10.20 0.00
 7 1 1 -65.96 0.00
 7 1 2 25.25 0.00
 7 1 3 13.26 0.00
 7 1 4 10.65 0.00
 7 1 5 -7.80 0.00
 7 1 6 -1.96 0.00
 7 1 7 10.80 0.00
 7 1 8 -19.98 0.00
 7 1 9 7.59 0.00
 7 1 10 -5.02 0.00
 7 1 11 -3.84 0.00
 7 1 12 4.88 0.00
 7 1 13 0.78 0.00
 7 1 14 -0.84 0.00
 7 1 15 5.24 0.00
 7 1 16 6.74 0.00
 7 1 17 -2.86 0.00
 7 1 18 0.96 0.00
 7 1 19 1.00 0.00
 7 3 0 -31.30 0.00
 7 3 1 -38.98 0.00
 7 3 2 6.41 0.00
 7 3 3 -55.21 0.00
 7 3 4 46.44 0.00
 7 3 5 7.07 0.00
 7 3 6 -7.29 0.00
 7 3 7 38.47 0.00
 7 3 8 9.88 0.00
 7 3 9 3.84 0.00
 7 3 10 -1.83 0.00
 7 3 11 -10.99 0.00
 7 3 12 2.78 0.00
 7 3 13 2.40 0.00
 7 3 14 -4.34 0.00
 7 3 15 3.36 0.00
 7 3 16 -2.29 0.00
 7 3 17 0.46 0.00
 7 3 18 1.62 0.00
 7 3 19 0.29 0.00
 7 5 0 -10.03 0.00
 7 5 1 18.26 0.00
 7 5 2 -4.51 0.00
 7 5 3 -15.15 0.00
 7 5 4 2.10 0.00
 7 5 5 16.36 0.00
 7 5 6 -19.29 0.00
 7 5 7 5.64 0.00
 7 5 8 -14.33 0.00
 7 5 9 -3.33 0.00
 7 5 10 1.56 0.00
 7 5 11 -8.12 0.00
 7 5 12 -3.69 0.00
 7 5 13 3.74 0.00
 7 5 14 -7.34 0.00
 7 5 15 3.11 0.00
 7 5 16 -4.91 0.00
 7 5 17 -0.23 0.00
 7 5 18 1.45 0.00
 7 5 19 -1.77 0.00
 7 7 0 -76.24 0.00
 7 7 1 54.03 0.00
 7 7 2 47.08 0.00
 7 7 3 14.07 0.00
 7 7 4 -15.93 0.00
 7 7 5 -0.88 0.00
 7 7 6 9.09 0.00
 7 7 7 -4.33 0.00
 7 7 8 4.17 0.00
 7 7 9 -2.96 0.00
 7 7 10 8.26 0.00
 7 7 11 -19.80 0.00
 7 7 12 8.11 0.00
 7 7 13 -7.56 0.00
 7 7 14 2.00 0.00
 7 7 15 -1.67 0.00
 7 7 16 -4.02 0.00
 7 7 17 -1.59 0.00
 7 7 18 4.45 0.00
 7 7 19 -0.69 0.00
 7 9 0 9.43 0.00
 7 9 1 -60.85 0.00
 7 9 2 22.48 0.00
 7 9 3 -26.49 0.00
 7 9 4 -14.03 0.00
 7 9 5 -24.09 0.00
 7 9 6 21.41 0.00
 7 9 7 -27.09 0.00
 7 9 8 -7.63 0.00
 7 9 9 0.71 0.00
 7 9 10 6.81 0.00
 7 9 11 -6.10 0.00
 7 9 12 5.94 0.00
 7 9 13 0.45 0.00
 7 9 14 2.15 0.00
 7 9 15 8.88 0.00
 7 9 16 -0.55 0.00
 7 9 17 2.12 0.00
 7 9 18 -1.70 0.00
 7 9 19 4.54 0.00
 7 11 0 11.72 0.00
 7 11 1 28.88 0.00
 7 11 2 -7.02 0.00
 7 11 3 13.32 0.00
 7 11 4 -11.87 0.00
 7 11 5 -6.54 0.00
 7 11 6 -5.36 0.00
 7 11 7 5.88 0.00
 7 11 8 -17.38 0.00
 7 11 9 5.68 0.00
 7 11 10 -9.72 0.00
 7 11 11 8.23 0.00
 7 11 12 -0.69 0.00
 7 11 13 5.53 0.00
 7 11 14 -4.19 0.00
 7 11 15 4.84 0.00
 7 11 16 4.71 0.00
 7 11 17 -1.01 0.00
 7 11 18 1.23 0.00
 7 13 0 57.81 0.00
 7 13 1 36.35 0.00
 7 13 2 1.99 0.00
 7 13 3 46.41 0.00
 7 13 4 17.04 0.00
 7 13 5 1.55 0.00
 7 13 6 0.09 0.00
 7 13 7 -7.03 0.00
 7 13 8 6.47 0.00
 7 13 9 -3.19 0.00
 7 13 10 6.68 0.00
 7 13 11 -5.77 0.00
 7 13 12 9.95 0.00
 7 13 13 -1.69 0.00
 7 13 14 3.87 0.00
 7 13 15 3.52 0.00
 7 13 16 1.46 0.00
 7 13 17 0.00 0.00
 7 13 18 -0.72 0.00
 7 15 0 24.62 0.00
 7 15 1 15.18 0.00
 7 15 2 -15.51 0.00
 7 15 3 7.99 0.00
 7 15 4 0.99 0.00
 7 15 5 -9.33 0.00
 7 15 6 -14.21 0.00
 7 15 7 5.71 0.00
 7 15 8 -1.99 0.00
 7 15 9 5.59 0.00
 7 15 10 0.55 0.00
 7 15 11 -1.33 0.00
 7 15 12 4.21 0.00
 7 15 13 1.84 0.00
 7 15 14 2.57 0.00
 7 15 15 7.80 0.00
 7 15 16 0.29 0.00
 7 15 17 -1.59 0.00
 7 15 18 -0.26 0.00
 7 17 0 -8.06 0.00
 7 17 1 -9.02 0.00
 7 17 2 -7.03 0.00
 7 17 3 3.07 0.00
 7 17 4 6.78 0.00
 7 17 5 -24.94 0.00
 7 17 6 0.16 0.00
 7 17 7 -1.85 0.00
 7 17 8 -9.65 0.00
 7 17 9 1.29 0.00
 7 17 10 -5.74 0.00
 7 17 11 -0.99 0.00
 7 17 12 0.01 0.00
 7 17 13 0.59 0.00
 7 17 14 -0.95 0.00
 7 17 15 2.19 0.00
 7 17 16 2.88 0.00
 7 17 17 1.00 0.00
 7 19 0 2.51 0.00
 7 19 1 -2.68 0.00
 7 19 2 -4.53 0.00
 7 19 3 -11.17 0.00
 7 19 4 -3.30 0.00
 7 19 5 -0.69 0.00
 7 19 6 6.37 0.00
 7 19 7 8.05 0.00
 7 19 8 2.74 0.00
 7 19 9 -6.71 0.00
 7 19 10 4.03 0.00
 7 19 11 -18.23 0.00
 7 19 12 -1.88 0.00
 7 19 13 -3.45 0.00
 7 19 14 3.61 0.00
 7 19 15 0.79 0.00
 7 19 16 -2.84 0.00
 7 19 17 1.39 0.00
 7 21 0 -30.45 0.00
 7 21 1 -13.32 0.00
 7 21 2 -5.18 0.00
 7 21 3 -9.45 0.00
 7 21 4 2.81 0.00
 7 21 5 -3.15 0.00
 7 21 6 10.17 0.00
 7 21 7 6.02 0.00
 7 21 8 -4.05 0.00
 7 21 9 0.67 0.00
 7 21 10 0.73 0.00
 7 21 11 -1.71 0.00
 7 21 12 -3.54 0.00
 7 21 13 -3.04 0.00
 7 21 14 0.85 0.00
 7 21 15 -3.26 0.00
 7 21 16 -1.01 0.00
 7 21 17 0.96 0.00
 7 23 0 12.03 0.00
 7 23 1 -3.58 0.00
 7 23 2 -2.06 0.00
 7 23 3 -9.80 0.00
 7 23 4 -1.23 0.00
 7 23 5 13.53 0.00
 7 23 6 -1.11 0.00
 7 23 7 7.16 0.00
 7 23 8 -2.66 0.00
 7 23 9 -2.28 0.00
 7 23 10 -0.73 0.00
 7 23 11 -4.81 0.00
 7 23 12 -0.06 0.00
 7 23 13 5.97 0.00
 7 23 14 1.15 0.00
 7 23 15 -4.89 0.00
 7 23 16 1.73 0.00
 7 25 0 -19.78 0.00
 7 25 1 6.30 0.00
 7 25 2 -3.04 0.00
 7 25 3 -1.02 0.00
 7 25 4 2.63 0.00
 7 25 5 6.96 0.00
 7 25 6 9.60 0.00
 7 25 7 4.95 0.00
 7 25 8 5.69 0.00
 7 25 9 5.04 0.00
 7 25 10 6.07 0.00
 7 25 11 -6.30 0.00
 7 25 12 0.95 0.00
 7 25 13 2.32 0.00
 7 25 14 4.32 0.00
 7 25 15 -2.05 0.00
 7 25 16 -0.63 0.00
 7 27 0 -4.86 0.00
 7 27 1 7.06 0.00
 7 27 2 -4.98 0.00
 7 27 3 -1.75 0.00
 7 27 4 -4.14 0.00
 7 27 5 4.64 0.00
 7 27 6 0.41 0.00
 7 27 7 -4.43 0.00
 7 27 8 -1.50 0.00
 7 27 9 0.01 0.00
 7 27 10 2.66 0.00
 7 27 11 -0.31 0.00
 7 27 12 -0.97 0.00
 7 27 13 4.25 0.00
 7 27 14 -5.14 0.00
 7 27 15 -0.01 0.00
 7 27 16 -1.06 0.00
 7 29 0 4.66 0.00
 7 29 1 11.04 0.00
 7 29 2 11.64 0.00
 7 29 3 5.52 0.00
 7 29 4 3.47 0.00
 7 29 5 -1.82 0.00
 7 29 6 -7.22 0.00
 7 29 7 0.28 0.00
 7 29 8 0.05 0.00
 7 29 9 -1.65 0.00
 7 29 10 -3.50 0.00
 7 29 11 0.20 0.00
 7 29 12 -2.41 0.00
 7 29 13 -0.51 0.00
 7 29 14 -1.56 0.00
 7 29 15 2.37 0.00
 7 31 0 9.23 0.00
 7 31 1 6.26 0.00
 7 31 2 1.89 0.00
 7 31 3 2.19 0.00
 7 31 4 1.28 0.00
 7 31 5 -5.51 0.00
 7 31 6 -4.91 0.00
 7 31 7 -4.26 0.00
 7 31 8 0.42 0.00
 7 31 9 -6.76 0.00
 7 31 10 -2.64 0.00
 7 31 11 -3.62 0.00
 7 31 12 4.09 0.00
 7 31 13 -2.77 0.00
 7 31 14 -0.87 0.00
 7 33 0 0.85 0.00
 7 33 1 -9.49 0.00
 7 33 2 2.45 0.00
 7 33 3 -0.68 0.00
 7 33 4 -5.71 0.00
 7 33 5 -4.61 0.00
 7 33 6 -13.45 0.00
 7 33 7 0.95 0.00
 7 33 8 -7.24 0.00
 7 33 9 -4.54 0.00
 7 33 10 -5.47 0.00
 7 33 11 7.01 0.00
 7 33 12 -0.84 0.00
 7 33 13 -2.75 0.00
 7 35 0 2.01 0.00
 7 35 1 -4.00 0.00
 7 35 2 4.07 0.00
 7 35 3 -5.63 0.00
 7 35 4 2.37 0.00
 7 35 5 -5.21 0.00
 7 35 6 6.96 0.00
 7 35 7 -6.70 0.00
 7 35 8 2.64 0.00
 7 35 9 1.21 0.00
 7 35 10 2.36 0.00
 7 35 11 -0.78 0.00
 7 35 12 3.40 0.00
 7 35 13 -5.92 0.00
 7 37 0 4.12 0.00
 7 37 1 3.80 0.00
 7 37 2 6.48 0.00
 7 37 3 10.02 0.00
 7 37 4 3.27 0.00
 7 37 5 4.87 0.00
 7 37 6 4.00 0.00
 7 37 7 4.99 0.00
 7 37 8 5.21 0.00
 7 37 9 -2.71 0.00
 7 37 10 5.06 0.00
 7 37 11 3.47 0.00
 7 37 12 5.16 0.00
 7 39 0 -3.35 0.00
 7 39 1 -1.17 0.00
 7 39 2 -3.00 0.00
 7 39 3 -1.60 0.00
 7 39 4 -1.56 0.00
 7 39 5 -1.53 0.00
 7 39 6 1.25 0.00
 7 39 7 -0.93 0.00
 7 39 8 -1.19 0.00
 7 39 9 2.49 0.00
 7 39 10 -3.53 0.00
 7 39 11 -3.73 0.00
 7 41 0 5.22 0.00
 7 41 1 -0.09 0.00
 7 41 2 -1.13 0.00
 7 41 3 -0.95 0.00
 7 41 4 5.96 0.00
 7 41 5 -0.98 0.00
 7 41 6 4.64 0.00
 7 41 7 -3.50 0.00
 7 41 8 1.14 0.00
 7 41 9 -1.62 0.00
 7 41 10 -2.70 0.00
 7 43 0 -0.66 0.00
 7 43 1 1.14 0.00
 7 43 2 -0.61 0.00
 7 43 3 1.09 0.00
 7 43 4 0.79 0.00
 7 43 5 4.08 0.00
 7 43 6 17.27 0.00
 7 43 7 6.18 0.00
 7 43 8 4.75 0.00
 7 45 0 0.57 0.00
 7 45 1 -1.09 0.00
 7 45 2 -3.95 0.00
 7 45 3 -3.49 0.00
 7 45 4 4.38 0.00
 7 45 5 -1.84 0.00
 7 45 6 -0.71 0.00
 7 47 1 2.71 0.00
 7 47 2 -7.88 0.00
 7 47 3 -4.75 0.00
 7 47 4 -6.25 0.00
 8 0 0 31.71 0.00
 8 0 1 2.76 0.00
 8 0 2 -129.52 0.00
 8 0 3 9.90 0.00
 8 0 4 11.32 0.00
 8 0 5 -16.81 0.00
 8 0 6 -18.63 0.00
 8 0 7 10.62 0.00
 8 0 8 4.51 0.00
 8 0 9 3.51 0.00
 8 0 10 -6.22 0.00
 8 0 11 -2.52 0.00
 8 0 12 1.10 0.00
 8 0 13 -0.18 0.00
 8 0 14 -2.37 0.00
 8 0 15 -0.83 0.00
 8 0 16 8.30 0.00
 8 0 17 -2.47 0.00
 8 0 18 -2.15 0.00
 8 2 0 26.37 0.00
 8 2 1 14.75 0.00
 8 2 2 -7.83 0.00
 8 2 3 -32.58 0.00
 8 2 4 13.41 0.00
 8 2 5 -4.79 0.00
 8 2 6 -30.64 0.00
 8 2 7 17.06 0.00
 8 2 8 0.28 0.00
 8 2 9 4.14 0.00
 8 2 10 -3.82 0.00
 8 2 11 0.42 0.00
 8 2 12 -1.20 0.00
 8 2 13 -0.81 0.00
 8 2 14 -5.14 0.00
 8 2 15 3.43 0.00
 8 2 16 1.58 0.00
 8 2 17 1.83 0.00
 8 2 18 2.68 0.00
 8 2 19 3.13 0.00
 8 4 0 -68.47 0.00
 8 4 1 -25.51 0.00
 8 4 2 42.41 0.00
 8 4 3 2.84 0.00
 8 4 4 -7.80 0.00
 8 4 5 -2.79 0.00
 8 4 6 -12.05 0.00
 8 4 7 17.31 0.00
 8 4 8 -8.15 0.00
 8 4 9 0.08 0.00
 8 4 10 13.35 0.00
 8 4 11 -2.31 0.00
 8 4 12 5.95 0.00
 8 4 13 -2.50 0.00
 8 4 14 -0.24 0.00
 8 4 15 3.03 0.00
 8 4 16 -5.34 0.00
 8 4 17 2.81 0.00
 8 4 18 1.06 0.00
 8 4 19 2.76 0.00
 8 6 0 51.55 0.00
 8 6 1 47.50 0.00
 8 6 2 45.65 0.00
 8 6 3 -10.92 0.00
 8 6 4 4.68 0.00
 8 6 5 -5.55 0.00
 8 6 6 3.22 0.00
 8 6 7 3.43 0.00
 8 6 8 -1.35 0.00
 8 6 9 3.70 0.00
 8 6 10 7.69 0.00
 8 6 11 -9.56 0.00
 8 6 12 3.14 0.00
 8 6 13 0.67 0.00
 8 6 14 3.71 0.00
 8 6 15 -0.23 0.00
 8 6 16 -2.66 0.00
 8 6 17 -0.05 0.00
 8 6 18 0.03 0.00
 8 6 19 1.57 0.00
 8 8 0 -73.34 0.00
 8 8 1 15.21 0.00
 8 8 2 11.44 0.00
 8 8 3 13.49 0.00
 8 8 4 -0.54 0.00
 8 8 5 14.61 0.00
 8 8 6 9.59 0.00
 8 8 7 -2.36 0.00
 8 8 8 -1.10 0.00
 8 8 9 13.82 0.00
 8 8 10 -3.29 0.00
 8 8 11 -2.65 0.00
 8 8 12 3.67 0.00
 8 8 13 2.25 0.00
 8 8 14 -0.96 0.00
 8 8 15 -2.93 0.00
 8 8 16 -5.05 0.00
 8 8 17 -1.20 0.00
 8 8 18 2.72 0.00
 8 10 0 -1.18 0.00
 8 10 1 28.55 0.00
 8 10 2 -12.65 0.00
 8 10 3 -1.17 0.00
 8 10 4 7.85 0.00
 8 10 5 -12.19 0.00
 8 10 6 -10.35 0.00
 8 10 7 -5.80 0.00
 8 10 8 4.58 0.00
 8 10 9 14.61 0.00
 8 10 10 -8.62 0.00
 8 10 11 -6.04 0.00
 8 10 12 -2.15 0.00
 8 10 13 -1.05 0.00
 8 10 14 -2.58 0.00
 8 10 15 -2.73 0.00
 8 10 16 -10.84 0.00
 8 10 17 1.37 0.00
 8 10 18 3.80 0.00
 8 12 0 -0.62 0.00
 8 12 1 10.36 0.00
 8 12 2 37.15 0.00
 8 12 3 9.46 0.00
 8 12 4 0.01 0.00
 8 12 5 2.03 0.00
 8 12 6 -10.50 0.00
 8 12 7 3.89 0.00
 8 12 8 -0.80 0.00
 8 12 9 -0.68 0.00
 8 12 10 2.08 0.00
 8 12 11 -3.93 0.00
 8 12 12 -4.85 0.00
 8 12 13 -2.89 0.00
 8 12 14 0.43 0.00
 8 12 15 -0.42 0.00
 8 12 16 -4.43 0.00
 8 12 17 -2.65 0.00
 8 12 18 0.95 0.00
 8 14 0 -15.01 0.00
 8 14 1 -18.74 0.00
 8 14 2 -28.07 0.00
 8 14 3 -3.01 0.00
 8 14 4 0.91 0.00
 8 14 5 -13.49 0.00
 8 14 6 0.64 0.00
 8 14 7 3.46 0.00
 8 14 8 5.09 0.00
 8 14 9 -1.16 0.00
 8 14 10 4.44 0.00
 8 14 11 0.16 0.00
 8 14 12 2.39 0.00
 8 14 13 -4.14 0.00
 8 14 14 -1.07 0.00
 8 14 15 -0.60 0.00
 8 14 16 -4.69 0.00
 8 14 17 -1.34 0.00
 8 14 18 4.64 0.00
 8 16 0 8.41 0.00
 8 16 1 -25.16 0.00
 8 16 2 -9.87 0.00
 8 16 3 -11.35 0.00
 8 16 4 -15.83 0.00
 8 16 5 -20.96 0.00
 8 16 6 -16.65 0.00
 8 16 7 -8.34 0.00
 8 16 8 0.69 0.00
 8 16 9 -7.77 0.00
 8 16 10 4.17 0.00
 8 16 11 -6.79 0.00
 8 16 12 5.12 0.00
 8 16 13 -0.31 0.00
 8 16 14 1.70 0.00
 8 16 15 6.38 0.00
 8 16 16 -0.97 0.00
 8 16 17 1.36 0.00
 8 18 0 -6.84 0.00
 8 18 1 11.04 0.00
 8 18 2 -11.88 0.00
 8 18 3 7.61 0.00
 8 18 4 1.33 0.00
 8 18 5 8.91 0.00
 8 18 6 -3.29 0.00
 8 18 7 6.26 0.00
 8 18 8 -8.72 0.00
 8 18 9 5.22 0.00
 8 18 10 -4.22 0.00
 8 18 11 2.54 0.00
 8 18 12 2.21 0.00
 8 18 13 3.67 0.00
 8 18 14 0.56 0.00
 8 18 15 3.69 0.00
 8 18 16 0.46 0.00
 8 18 17 1.61 0.00
 8 20 0 10.62 0.00
 8 20 1 6.22 0.00
 8 20 2 11.70 0.00
 8 20 3 0.68 0.00
 8 20 4 8.25 0.00
 8 20 5 4.23 0.00
 8 20 6 12.87 0.00
 8 20 7 -1.55 0.00
 8 20 8 6.57 0.00
 8 20 9 4.30 0.00
 8 20 10 3.97 0.00
 8 20 11 -0.78 0.00
 8 20 12 3.11 0.00
 8 20 13 -0.75 0.00
 8 20 14 1.62 0.00
 8 20 15 -0.73 0.00
 8 20 16 -0.46 0.00
 8 20 17 -2.02 0.00
 8 22 0 -11.17 0.00
 8 22 1 -14.62 0.00
 8 22 2 20.57 0.00
 8 22 3 -17.12 0.00
 8 22 4 6.47 0.00
 8 22 5 -0.36 0.00
 8 22 6 4.29 0.00
 8 22 7 0.39 0.00
 8 22 8 -9.24 0.00
 8 22 9 -3.66 0.00
 8 22 10 4.68 0.00
 8 22 11 -3.31 0.00
 8 22 12 -0.61 0.00
 8 22 13 4.29 0.00
 8 22 14 4.25 0.00
 8 22 15 -5.14 0.00
 8 22 16 0.00 0.00
 8 22 17 12.18 0.00
 8 24 0 -4.74 0.00
 8 24 1 9.51 0.00
 8 24 2 1.41 0.00
 8 24 3 -4.50 0.00
 8 24 4 -1.14 0.00
 8 24 5 -7.38 0.00
 8 24 6 -1.45 0.00
 8 24 7 1.48 0.00
 8 24 8 -9.53 0.00
 8 24 9 2.72 0.00
 8 24 10 4.29 0.00
 8 24 11 -3.84 0.00
 8 24 12 -6.41 0.00
 8 24 13 -2.27 0.00
 8 24 14 -2.32 0.00
 8 24 15 -5.73 0.00
 8 24 16 0.58 0.00
 8 26 0 -3.70 0.00
 8 26 1 -3.82 0.00
 8 26 2 4.74 0.00
 8 26 3 -9.07 0.00
 8 26 4 3.34 0.00
 8 26 5 1.95 0.00
 8 26 6 1.43 0.00
 8 26 7 7.52 0.00
 8 26 8 -3.77 0.00
 8 26 9 -0.17 0.00
 8 26 10 6.76 0.00
 8 26 11 -3.85 0.00
 8 26 12 0.88 0.00
 8 26 13 5.95 0.00
 8 26 14 -7.52 0.00
 8 26 15 0.16 0.00
 8 26 16 5.53 0.00
 8 28 0 1.82 0.00
 8 28 1 3.83 0.00
 8 28 2 -3.81 0.00
 8 28 3 -5.13 0.00
 8 28 4 6.22 0.00
 8 28 5 -6.10 0.00
 8 28 6 -5.16 0.00
 8 28 7 -7.52 0.00
 8 28 8 1.46 0.00
 8 28 9 -1.63 0.00
 8 28 10 -0.14 0.00
 8 28 11 -3.10 0.00
 8 28 12 2.72 0.00
 8 28 13 -0.18 0.00
 8 28 14 -3.30 0.00
 8 28 15 -3.28 0.00
 8 30 0 6.41 0.00
 8 30 1 -0.57 0.00
 8 30 2 3.23 0.00
 8 30 3 0.59 0.00
 8 30 4 -0.75 0.00
 8 30 5 1.55 0.00
 8 30 6 -4.99 0.00
 8 30 7 -0.99 0.00
 8 30 8 -2.98 0.00
 8 30 9 0.90 0.00
 8 30 10 -3.36 0.00
 8 30 11 -0.07 0.00
 8 30 12 -1.25 0.00
 8 30 13 -0.87 0.00
 8 30 14 5.64 0.00
 8 32 0 4.43 0.00
 8 32 1 -2.51 0.00
 8 32 2 1.14 0.00
 8 32 3 -6.49 0.00
 8 32 4 1.00 0.00
 8 32 5 -5.40 0.00
 8 32 6 0.70 0.00
 8 32 7 -0.20 0.00
 8 32 8 -5.02 0.00
 8 32 9 0.67 0.00
 8 32 10 1.15 0.00
 8 32 11 3.53 0.00
 8 32 12 3.01 0.00
 8 32 13 0.32 0.00
 8 34 0 -7.08 0.00
 8 34 1 -5.76 0.00
 8 34 2 -2.13 0.00
 8 34 3 1.79 0.00
 8 34 4 -1.79 0.00
 8 34 5 -1.86 0.00
 8 34 6 -0.71 0.00
 8 34 7 -0.86 0.00
 8 34 8 -1.35 0.00
 8 34 9 -0.72 0.00
 8 34 10 -0.98 0.00
 8 34 11 4.20 0.00
 8 34 12 1.82 0.00
 8 34 13 -3.66 0.00
 8 36 0 1.16 0.00
 8 36 1 4.79 0.00
 8 36 2 4.46 0.00
 8 36 3 4.20 0.00
 8 36 4 1.37 0.00
 8 36 5 5.60 0.00
 8 36 6 -1.03 0.00
 8 36 7 2.94 0.00
 8 36 8 -6.50 0.00
 8 36 9 2.66 0.00
 8 36 10 -2.33 0.00
 8 36 11 1.21 0.00
 8 36 12 -2.32 0.00
 8 38 0 -1.24 0.00
 8 38 1 -2.79 0.00
 8 38 2 -1.19 0.00
 8 38 3 -3.31 0.00
 8 38 4 3.60 0.00
 8 38 5 -2.82 0.00
 8 38 6 6.18 0.00
 8 38 7 -9.65 0.00
 8 38 8 0.40 0.00
 8 38 9 -3.26 0.00
 8 38 10 -0.54 0.00
 8 38 11 1.65 0.00
 8 40 0 0.25 0.00
 8 40 1 -0.80 0.00
 8 40 2 -1.74 0.00
 8 40 3 0.23 0.00
 8 40 4 -1.82 0.00
 8 40 5 1.92 0.00
 8 40 6 -1.44 0.00
 8 40 7 -0.15 0.00
 8 40 8 0.24 0.00
 8 40 9 -3.59 0.00
 8 40 10 0.32 0.00
 8 42 0 0.43 0.00
 8 42 1 -4.51 0.00
 8 42 2 2.21 0.00
 8 42 3 -3.41 0.00
 8 42 4 5.68 0.00
 8 42 5 -1.55 0.00
 8 42 6 0.65 0.00
 8 42 7 0.29 0.00
 8 42 8 5.18 0.00
 8 44 0 0.04 0.00
 8 44 1 0.07 0.00
 8 44 2 0.74 0.00
 8 44 3 1.58 0.00
 8 44 4 1.56 0.00
 8 44 5 -0.10 0.00
 8 44 6 1.63 0.00
 8 44 7 -5.42 0.00
 8 46 1 11.78 0.00
 8 46 2 -0.07 0.00
 8 46 3 -3.88 0.00
 8 46 4 -7.10 0.00
 9 1 0 -6.63 0.00
 9 1 1 57.73 0.00
 9 1 2 -19.83 0.00
 9 1 3 2.32 0.00
 9 1 4 -4.06 0.00
 9 1 5 -38.27 0.00
 9 1 6 2.49 0.00
 9 1 7 -6.22 0.00
 9 1 8 -0.40 0.00
 9 1 9 -7.05 0.00
 9 1 10 -1.41 0.00
 9 1 11 18.60 0.00
 9 1 12 0.04 0.00
 9 1 13 4.40 0.00
 9 1 14 -1.76 0.00
 9 1 15 5.34 0.00
 9 1 16 -1.18 0.00
 9 1 17 -1.95 0.00
 9 1 18 -4.49 0.00
 9 3 0 30.23 0.00
 9 3 1 15.19 0.00
 9 3 2 0.26 0.00
 9 3 3 -47.37 0.00
 9 3 4 29.31 0.00
 9 3 5 -24.90 0.00
 9 3 6 0.72 0.00
 9 3 7 15.08 0.00
 9 3 8 13.49 0.00
 9 3 9 -13.94 0.00
 9 3 10 -4.14 0.00
 9 3 11 -1.50 0.00
 9 3 12 2.24 0.00
 9 3 13 -3.61 0.00
 9 3 14 0.74 0.00
 9 3 15 -2.30 0.00
 9 3 16 -1.73 0.00
 9 3 17 2.29 0.00
 9 3 18 -1.56 0.00
 9 5 0 47.14 0.00
 9 5 1 13.42 0.00
 9 5 2 -13.55 0.00
 9 5 3 -3.34 0.00
 9 5 4 -17.06 0.00
 9 5 5 0.48 0.00
 9 5 6 1.81 0.00
 9 5 7 11.56 0.00
 9 5 8 -3.08 0.00
 9 5 9 3.14 0.00
 9 5 10 3.62 0.00
 9 5 11 8.12 0.00
 9 5 12 4.08 0.00
 9 5 13 4.33 0.00
 9 5 14 5.06 0.00
 9 5 15 -0.84 0.00
 9 5 16 1.66 0.00
 9 5 17 3.82 0.00
 9 5 18 -1.69 0.00
 9 7 0 -2.63 0.00
 9 7 1 5.26 0.00
 9 7 2 30.26 0.00
 9 7 3 -17.90 0.00
 9 7 4 -21.93 0.00
 9 7 5 -9.42 0.00
 9 7 6 19.17 0.00
 9 7 7 9.60 0.00
 9 7 8 2.11 0.00
 9 7 9 7.27 0.00
 9 7 10 -0.13 0.00
 9 7 11 -5.23 0.00
 9 7 12 -0.10 0.00
 9 7 13 -1.25 0.00
 9 7 14 2.96 0.00
 9 7 15 -2.75 0.00
 9 7 16 -3.96 0.00
 9 7 17 1.76 0.00
 9 7 18 1.97 0.00
 9 9 0 8.08 0.00
 9 9 1 7.46 0.00
 9 9 2 6.06 0.00
 9 9 3 3.63 0.00
 9 9 4 -21.35 0.00
 9 9 5 7.58 0.00
 9 9 6 17.75 0.00
 9 9 7 -2.69 0.00
 9 9 8 -16.46 0.00
 9 9 9 3.07 0.00
 9 9 10 -12.36 0.00
 9 9 11 1.23 0.00
 9 9 12 -10.60 0.00
 9 9 13 -0.02 0.00
 9 9 14 -2.18 0.00
 9 9 15 -0.92 0.00
 9 9 16 -4.12 0.00
 9 9 17 -1.32 0.00
 9 9 18 -0.01 0.00
 9 11 0 -14.31 0.00
 9 11 1 17.96 0.00
 9 11 2 -12.95 0.00
 9 11 3 -25.50 0.00
 9 11 4 -6.05 0.00
 9 11 5 -5.41 0.00
 9 11 6 -1.73 0.00
 9 11 7 6.23 0.00
 9 11 8 -4.68 0.00
 9 11 9 -2.67 0.00
 9 11 10 -7.84 0.00
 9 11 11 3.92 0.00
 9 11 12 -2.07 0.00
 9 11 13 -2.82 0.00
 9 11 14 -1.28 0.00
 9 11 15 -4.89 0.00
 9 11 16 1.91 0.00
 9 11 17 -1.93 0.00
 9 11 18 2.59 0.00
 9 13 0 25.59 0.00
 9 13 1 -25.28 0.00
 9 13 2 -0.05 0.00
 9 13 3 -19.92 0.00
 9 13 4 13.15 0.00
 9 13 5 -3.61 0.00
 9 13 6 5.45 0.00
 9 13 7 1.88 0.00
 9 13 8 13.72 0.00
 9 13 9 -5.07 0.00
 9 13 10 1.05 0.00
 9 13 11 0.68 0.00
 9 13 12 5.10 0.00
 9 13 13 -6.38 0.00
 9 13 14 2.67 0.00
 9 13 15 -0.65 0.00
 9 13 16 -2.27 0.00
 9 13 17 -0.48 0.00
 9 13 18 -1.76 0.00
 9 15 0 9.96 0.00
 9 15 1 -26.94 0.00
 9 15 2 -22.72 0.00
 9 15 3 -21.92 0.00
 9 15 4 -6.29 0.00
 9 15 5 3.85 0.00
 9 15 6 -10.49 0.00
 9 15 7 9.05 0.00
 9 15 8 0.81 0.00
 9 15 9 1.18 0.00
 9 15 10 -4.11 0.00
 9 15 11 3.31 0.00
 9 15 12 -2.95 0.00
 9 15 13 -2.53 0.00
 9 15 14 -3.76 0.00
 9 15 15 4.83 0.00
 9 15 16 -2.77 0.00
 9 15 17 -1.86 0.00
 9 17 0 -1.74 0.00
 9 17 1 -20.16 0.00
 9 17 2 8.07 0.00
 9 17 3 1.49 0.00
 9 17 4 -5.83 0.00
 9 17 5 -6.62 0.00
 9 17 6 7.03 0.00
 9 17 7 2.77 0.00
 9 17 8 -1.97 0.00
 9 17 9 0.84 0.00
 9 17 10 0.97 0.00
 9 17 11 7.77 0.00
 9 17 12 0.87 0.00
 9 17 13 -1.04 0.00
 9 17 14 1.41 0.00
 9 17 15 1.33 0.00
 9 17 16 0.60 0.00
 9 17 17 -0.64 0.00
 9 19 0 10.33 0.00
 9 19 1 17.72 0.00
 9 19 2 8.31 0.00
 9 19 3 12.24 0.00
 9 19 4 -2.90 0.00
 9 19 5 13.63 0.00
 9 19 6 5.00 0.00
 9 19 7 2.03 0.00
 9 19 8 6.66 0.00
 9 19 9 0.09 0.00
 9 19 10 6.82 0.00
 9 19 11 -0.83 0.00
 9 19 12 1.98 0.00
 9 19 13 0.47 0.00
 9 19 14 4.79 0.00
 9 19 15 4.86 0.00
 9 19 16 -3.35 0.00
 9 19 17 1.88 0.00
 9 21 0 -7.19 0.00
 9 21 1 5.19 0.00
 9 21 2 12.83 0.00
 9 21 3 2.57 0.00
 9 21 4 -4.20 0.00
 9 21 5 -7.74 0.00
 9 21 6 -1.04 0.00
 9 21 7 -3.34 0.00
 9 21 8 -3.43 0.00
 9 21 9 3.13 0.00
 9 21 10 3.27 0.00
 9 21 11 7.91 0.00
 9 21 12 2.60 0.00
 9 21 13 -1.33 0.00
 9 21 14 3.51 0.00
 9 21 15 0.66 0.00
 9 21 16 -1.80 0.00
 9 21 17 3.33 0.00
 9 23 0 4.26 0.00
 9 23 1 9.66 0.00
 9 23 2 5.86 0.00
 9 23 3 -0.80 0.00
 9 23 4 -2.12 0.00
 9 23 5 -4.44 0.00
 9 23 6 -6.12 0.00
 9 23 7 -6.28 0.00
 9 23 8 -5.42 0.00
 9 23 9 0.05 0.00
 9 23 10 -1.13 0.00
 9 23 11 0.67 0.00
 9 23 12 -1.14 0.00
 9 23 13 6.66 0.00
 9 23 14 -2.20 0.00
 9 23 15 -3.46 0.00
 9 23 16 6.18 0.00
 9 25 0 -2.78 0.00
 9 25 1 14.79 0.00
 9 25 2 8.47 0.00
 9 25 3 6.27 0.00
 9 25 4 8.27 0.00
 9 25 5 1.71 0.00
 9 25 6 5.44 0.00
 9 25 7 5.20 0.00
 9 25 8 -2.71 0.00
 9 25 9 3.46 0.00
 9 25 10 2.48 0.00
 9 25 11 -9.65 0.00
 9 25 12 -1.74 0.00
 9 25 13 -0.94 0.00
 9 25 14 -0.87 0.00
 9 25 15 -4.16 0.00
 9 25 16 4.87 0.00
 9 27 0 -0.29 0.00
 9 27 1 -4.75 0.00
 9 27 2 -1.17 0.00
 9 27 3 -4.08 0.00
 9 27 4 -1.33 0.00
 9 27 5 4.80 0.00
 9 27 6 -0.17 0.00
 9 27 7 4.44 0.00
 9 27 8 -9.36 0.00
 9 27 9 1.74 0.00
 9 27 10 -0.63 0.00
 9 27 11 -4.89 0.00
 9 27 12 -1.76 0.00
 9 27 13 2.05 0.00
 9 27 14 -7.40 0.00
 9 27 15 0.05 0.00
 9 29 0 0.74 0.00
 9 29 1 -9.82 0.00
 9 29 2 -3.37 0.00
 9 29 3 -7.83 0.00
 9 29 4 3.77 0.00
 9 29 5 -6.00 0.00
 9 29 6 -0.29 0.00
 9 29 7 0.50 0.00
 9 29 8 2.57 0.00
 9 29 9 -3.33 0.00
 9 29 10 -2.55 0.00
 9 29 11 -0.16 0.00
 9 29 12 1.46 0.00
 9 29 13 -0.58 0.00
 9 29 14 -0.01 0.00
 9 31 0 -5.35 0.00
 9 31 1 2.39 0.00
 9 31 2 -11.84 0.00
 9 31 3 -0.98 0.00
 9 31 4 1.37 0.00
 9 31 5 0.37 0.00
 9 31 6 9.20 0.00
 9 31 7 6.74 0.00
 9 31 8 8.51 0.00
 9 31 9 2.70 0.00
 9 31 10 -1.85 0.00
 9 31 11 0.29 0.00
 9 31 12 4.35 0.00
 9 31 13 -1.16 0.00
 9 31 14 3.66 0.00
 9 33 0 1.76 0.00
 9 33 1 -0.13 0.00
 9 33 2 -2.67 0.00
 9 33 3 4.06 0.00
 9 33 4 1.08 0.00
 9 33 5 2.88 0.00
 9 33 6 2.93 0.00
 9 33 7 8.57 0.00
 9 33 8 4.12 0.00
 9 33 9 5.05 0.00
 9 33 10 -1.39 0.00
 9 33 11 9.37 0.00
 9 33 12 1.38 0.00
 9 33 13 -8.08 0.00
 9 35 0 -4.47 0.00
 9 35 1 3.88 0.00
 9 35 2 -4.94 0.00
 9 35 3 -2.94 0.00
 9 35 4 -5.22 0.00
 9 35 5 -0.97 0.00
 9 35 6 8.10 0.00
 9 35 7 -0.38 0.00
 9 35 8 2.05 0.00
 9 35 9 2.21 0.00
 9 35 10 -0.29 0.00
 9 35 11 -2.62 0.00
 9 35 12 1.32 0.00
 9 37 0 -2.77 0.00
 9 37 1 2.14 0.00
 9 37 2 -4.10 0.00
 9 37 3 3.27 0.00
 9 37 4 -3.65 0.00
 9 37 5 1.12 0.00
 9 37 6 0.36 0.00
 9 37 7 6.44 0.00
 9 37 8 1.87 0.00
 9 37 9 2.24 0.00
 9 37 10 1.36 0.00
 9 37 11 3.19 0.00
 9 39 0 -0.75 0.00
 9 39 1 1.83 0.00
 9 39 2 1.65 0.00
 9 39 3 -1.58 0.00
 9 39 4 0.37 0.00
 9 39 5 -0.52 0.00
 9 39 6 0.34 0.00
 9 39 7 -0.78 0.00
 9 39 8 -0.81 0.00
 9 39 9 -3.00 0.00
 9 39 10 -3.63 0.00
 9 41 0 3.52 0.00
 9 41 1 1.86 0.00
 9 41 2 -0.28 0.00
 9 41 3 1.10 0.00
 9 41 4 -0.68 0.00
 9 41 5 1.65 0.00
 9 41 6 -11.67 0.00
 9 41 7 -1.92 0.00
 9 41 8 -3.24 0.00
 9 41 9 -2.28 0.00
 9 43 0 -7.01 0.00
 9 43 1 1.26 0.00
 9 43 2 0.89 0.00
 9 43 3 3.09 0.00
 9 43 4 -7.09 0.00
 9 43 5 3.64 0.00
 9 43 6 2.08 0.00
 9 43 7 1.21 0.00
 9 45 1 0.63 0.00
 9 45 2 3.67 0.00
 9 45 3 0.04 0.00
 9 45 4 5.20 0.00
 9 45 5 -4.34 0.00
 10 0 0 61.61 0.00
 10 0 1 -15.07 0.00
 10 0 2 -31.71 0.00
 10 0 3 13.92 0.00
 10 0 4 17.74 0.00
 10 0 5 -27.15 0.00
 10 0 6 18.07 0.00
 10 0 7 -17.47 0.00
 10 0 8 -0.52 0.00
 10 0 9 4.98 0.00
 10 0 10 -7.45 0.00
 10 0 11 2.96 0.00
 10 0 12 -2.54 0.00
 10 0 13 -0.87 0.00
 10 0 14 -1.78 0.00
 10 0 15 3.09 0.00
 10 0 16 -4.02 0.00
 10 0 17 0.46 0.00
 10 0 18 -9.49 0.00
 10 2 0 47.43 0.00
 10 2 1 6.05 0.00
 10 2 2 -19.42 0.00
 10 2 3 -18.05 0.00
 10 2 4 15.54 0.00
 10 2 5 2.78 0.00
 10 2 6 5.80 0.00
 10 2 7 -4.26 0.00
 10 2 8 0.66 0.00
 10 2 9 2.27 0.00
 10 2 10 -6.11 0.00
 10 2 11 4.68 0.00
 10 2 12 -7.09 0.00
 10 2 13 -4.55 0.00
 10 2 14 3.18 0.00
 10 2 15 1.65 0.00
 10 2 16 0.08 0.00
 10 2 17 0.65 0.00
 10 2 18 1.91 0.00
 10 4 0 -50.23 0.00
 10 4 1 -13.05 0.00
 10 4 2 21.39 0.00
 10 4 3 21.50 0.00
 10 4 4 -7.63 0.00
 10 4 5 -4.86 0.00
 10 4 6 7.03 0.00
 10 4 7 -14.07 0.00
 10 4 8 -5.71 0.00
 10 4 9 -9.99 0.00
 10 4 10 4.84 0.00
 10 4 11 5.43 0.00
 10 4 12 -1.70 0.00
 10 4 13 -3.16 0.00
 10 4 14 7.57 0.00
 10 4 15 0.33 0.00
 10 4 16 -2.50 0.00
 10 4 17 1.10 0.00
 10 4 18 2.55 0.00
 10 6 0 34.99 0.00
 10 6 1 9.36 0.00
 10 6 2 -9.02 0.00
 10 6 3 1.22 0.00
 10 6 4 1.69 0.00
 10 6 5 1.68 0.00
 10 6 6 13.63 0.00
 10 6 7 -7.29 0.00
 10 6 8 -1.58 0.00
 10 6 9 1.06 0.00
 10 6 10 5.10 0.00
 10 6 11 7.23 0.00
 10 6 12 -9.27 0.00
 10 6 13 2.88 0.00
 10 6 14 4.47 0.00
 10 6 15 -5.23 0.00
 10 6 16 -0.78 0.00
 10 6 17 3.27 0.00
 10 6 18 2.60 0.00
 10 8 0 -25.19 0.00
 10 8 1 -28.30 0.00
 10 8 2 5.09 0.00
 10 8 3 10.65 0.00
 10 8 4 14.38 0.00
 10 8 5 8.27 0.00
 10 8 6 14.48 0.00
 10 8 7 -11.94 0.00
 10 8 8 -3.05 0.00
 10 8 9 5.34 0.00
 10 8 10 -0.70 0.00
 10 8 11 5.75 0.00
 10 8 12 -0.84 0.00
 10 8 13 1.58 0.00
 10 8 14 2.73 0.00
 10 8 15 -5.30 0.00
 10 8 16 -0.48 0.00
 10 8 17 4.99 0.00
 10 8 18 2.82 0.00
 10 10 0 38.13 0.00
 10 10 1 -12.96 0.00
 10 10 2 -6.33 0.00
 10 10 3 6.39 0.00
 10 10 4 22.36 0.00
 10 10 5 5.43 0.00
 10 10 6 5.73 0.00
 10 10 7 -0.60 0.00
 10 10 8 2.97 0.00
 10 10 9 8.70 0.00
 10 10 10 -6.74 0.00
 10 10 11 -0.94 0.00
 10 10 12 2.23 0.00
 10 10 13 -1.79 0.00
 10 10 14 1.55 0.00
 10 10 15 -4.43 0.00
 10 10 16 0.29 0.00
 10 10 17 5.23 0.00
 10 10 18 6.59 0.00
 10 12 0 3.90 0.00
 10 12 1 -5.40 0.00
 10 12 2 0.45 0.00
 10 12 3 12.07 0.00
 10 12 4 0.25 0.00
 10 12 5 10.99 0.00
 10 12 6 -5.25 0.00
 10 12 7 2.72 0.00
 10 12 8 -7.14 0.00
 10 12 9 3.04 0.00
 10 12 10 -0.39 0.00
 10 12 11 2.74 0.00
 10 12 12 4.03 0.00
 10 12 13 -0.48 0.00
 10 12 14 5.81 0.00
 10 12 15 -1.01 0.00
 10 12 16 10.74 0.00
 10 12 17 -0.14 0.00
 10 14 0 -11.27 0.00
 10 14 1 -24.62 0.00
 10 14 2 -18.74 0.00
 10 14 3 4.75 0.00
 10 14 4 4.45 0.00
 10 14 5 0.25 0.00
 10 14 6 8.25 0.00
 10 14 7 1.77 0.00
 10 14 8 0.19 0.00
 10 14 9 -1.79 0.00
 10 14 10 -8.30 0.00
 10 14 11 1.94 0.00
 10 14 12 1.70 0.00
 10 14 13 -4.08 0.00
 10 14 14 -2.63 0.00
 10 14 15 -3.80 0.00
 10 14 16 -1.11 0.00
 10 14 17 0.13 0.00
 10 16 0 19.70 0.00
 10 16 1 -3.00 0.00
 10 16 2 -2.52 0.00
 10 16 3 14.25 0.00
 10 16 4 5.66 0.00
 10 16 5 -2.99 0.00
 10 16 6 -8.79 0.00
 10 16 7 1.48 0.00
 10 16 8 -3.63 0.00
 10 16 9 -1.60 0.00
 10 16 10 -7.78 0.00
 10 16 11 1.60 0.00
 10 16 12 -2.59 0.00
 10 16 13 -4.17 0.00
 10 16 14 -2.72 0.00
 10 16 15 -4.38 0.00
 10 16 16 0.17 0.00
 10 16 17 -0.57 0.00
 10 18 0 7.06 0.00
 10 18 1 7.49 0.00
 10 18 2 13.01 0.00
 10 18 3 16.69 0.00
 10 18 4 10.83 0.00
 10 18 5 10.43 0.00
 10 18 6 0.55 0.00
 10 18 7 7.75 0.00
 10 18 8 3.57 0.00
 10 18 9 0.59 0.00
 10 18 10 -1.43 0.00
 10 18 11 4.39 0.00
 10 18 12 1.54 0.00
 10 18 13 -1.40 0.00
 10 18 14 1.53 0.00
 10 18 15 1.26 0.00
 10 18 16 -3.74 0.00
 10 18 17 4.87 0.00
 10 20 0 11.07 0.00
 10 20 1 1.91 0.00
 10 20 2 2.07 0.00
 10 20 3 5.24 0.00
 10 20 4 1.81 0.00
 10 20 5 -3.62 0.00
 10 20 6 3.78 0.00
 10 20 7 -4.25 0.00
 10 20 8 10.02 0.00
 10 20 9 -1.21 0.00
 10 20 10 1.08 0.00
 10 20 11 0.73 0.00
 10 20 12 0.89 0.00
 10 20 13 -2.43 0.00
 10 20 14 -4.84 0.00
 10 20 15 0.09 0.00
 10 20 16 -3.74 0.00
 10 22 0 -19.97 0.00
 10 22 1 -11.32 0.00
 10 22 2 5.86 0.00
 10 22 3 -2.93 0.00
 10 22 4 -11.14 0.00
 10 22 5 -1.58 0.00
 10 22 6 -1.18 0.00
 10 22 7 -2.27 0.00
 10 22 8 -2.28 0.00
 10 22 9 -1.58 0.00
 10 22 10 -1.64 0.00
 10 22 11 0.08 0.00
 10 22 12 -1.02 0.00
 10 22 13 2.71 0.00
 10 22 14 2.47 0.00
 10 22 15 -2.06 0.00
 10 22 16 3.05 0.00
 10 24 0 -1.58 0.00
 10 24 1 20.46 0.00
 10 24 2 -4.36 0.00
 10 24 3 16.95 0.00
 10 24 4 -4.20 0.00
 10 24 5 -2.29 0.00
 10 24 6 1.65 0.00
 10 24 7 -1.73 0.00
 10 24 8 -1.02 0.00
 10 24 9 2.42 0.00
 10 24 10 -0.05 0.00
 10 24 11 -2.98 0.00
 10 24 12 -1.98 0.00
 10 24 13 1.32 0.00
 10 24 14 1.47 0.00
 10 24 15 -4.72 0.00
 10 24 16 3.98 0.00
 10 26 0 -5.40 0.00
 10 26 1 -2.44 0.00
 10 26 2 2.60 0.00
 10 26 3 0.29 0.00
 10 26 4 -2.08 0.00
 10 26 5 0.61 0.00
 10 26 6 7.20 0.00
 10 26 7 -0.23 0.00
 10 26 8 -0.12 0.00
 10 26 9 -1.73 0.00
 10 26 10 -3.24 0.00
 10 26 11 -3.18 0.00
 10 26 12 3.41 0.00
 10 26 13 6.36 0.00
 10 26 14 -0.62 0.00
 10 26 15 -3.78 0.00
 10 28 0 -13.07 0.00
 10 28 1 -9.46 0.00
 10 28 2 -10.99 0.00
 10 28 3 3.35 0.00
 10 28 4 -1.46 0.00
 10 28 5 2.23 0.00
 10 28 6 -9.13 0.00
 10 28 7 -3.48 0.00
 10 28 8 5.81 0.00
 10 28 9 2.82 0.00
 10 28 10 -3.38 0.00
 10 28 11 0.86 0.00
 10 28 12 2.22 0.00
 10 28 13 1.37 0.00
 10 28 14 -3.88 0.00
 10 30 0 -12.14 0.00
 10 30 1 -6.29 0.00
 10 30 2 -4.92 0.00
 10 30 3 3.17 0.00
 10 30 4 0.23 0.00
 10 30 5 4.07 0.00
 10 30 6 2.12 0.00
 10 30 7 0.09 0.00
 10 30 8 2.04 0.00
 10 30 9 0.50 0.00
 10 30 10 -2.90 0.00
 10 30 11 0.59 0.00
 10 30 12 4.36 0.00
 10 30 13 -0.42 0.00
 10 30 14 5.27 0.00
 10 32 0 3.08 0.00
 10 32 1 2.74 0.00
 10 32 2 3.79 0.00
 10 32 3 8.72 0.00
 10 32 4 9.93 0.00
 10 32 5 -1.07 0.00
 10 32 6 7.94 0.00
 10 32 7 3.10 0.00
 10 32 8 4.29 0.00
 10 32 9 1.16 0.00
 10 32 10 3.14 0.00
 10 32 11 1.51 0.00
 10 32 12 -2.06 0.00
 10 32 13 -0.64 0.00
 10 34 0 -4.27 0.00
 10 34 1 1.28 0.00
 10 34 2 -1.48 0.00
 10 34 3 7.14 0.00
 10 34 4 -2.50 0.00
 10 34 5 0.88 0.00
 10 34 6 -0.05 0.00
 10 34 7 -0.16 0.00
 10 34 8 -1.16 0.00
 10 34 9 -1.83 0.00
 10 34 10 -0.86 0.00
 10 34 11 1.63 0.00
 10 34 12 -2.20 0.00
 10 36 0 1.67 0.00
 10 36 1 -0.82 0.00
 10 36 2 0.10 0.00
 10 36 3 -3.70 0.00
 10 36 4 -3.12 0.00
 10 36 5 -5.79 0.00
 10 36 6 -2.77 0.00
 10 36 7 -5.42 0.00
 10 36 8 -0.31 0.00
 10 36 9 0.28 0.00
 10 36 10 5.92 0.00
 10 36 11 0.05 0.00
 10 38 0 4.60 0.00
 10 38 1 -0.61 0.00
 10 38 2 0.58 0.00
 10 38 3 -6.78 0.00
 10 38 4 -2.28 0.00
 10 38 5 -1.52 0.00
 10 38 6 -1.67 0.00
 10 38 7 -4.88 0.00
 10 38 8 0.60 0.00
 10 38 9 1.11 0.00
 10 38 10 6.99 0.00
 10 40 0 5.88 0.00
 10 40 1 5.40 0.00
 10 40 2 2.19 0.00
 10 40 3 0.67 0.00
 10 40 4 -1.11 0.00
 10 40 5 0.85 0.00
 10 40 6 0.33 0.00
 10 40 7 0.13 0.00
 10 40 8 2.12 0.00
 10 40 9 -6.90 0.00
 10 42 0 -2.35 0.00
 10 42 1 0.64 0.00
 10 42 2 -3.22 0.00
 10 42 3 -5.11 0.00
 10 42 4 -1.93 0.00
 10 42 5 -2.60 0.00
 10 42 6 -3.27 0.00
 10 42 7 -1.41 0.00
 10 44 1 5.14 0.00
 10 44 2 2.73 0.00
 10 44 3 3.19 0.00
 10 44 4 0.24 0.00
 10 44 5 5.59 0.00
 10 46 0 5.35 0.00
 10 46 1 5.50 0.00
 10 46 2 5.65 0.00
 10 46 3 -8.14 0.00
 11 1 0 14.90 0.00
 11 1 1 -52.56 0.00
 11 1 2 2.67 0.00
 11 1 3 30.29 0.00
 11 1 4 -9.20 0.00
 11 1 5 3.65 0.00
 11 1 6 -3.81 0.00
 11 1 7 -10.51 0.00
 11 1 8 -4.66 0.00
 11 1 9 2.20 0.00
 11 1 10 0.94 0.00
 11 1 11 -4.52 0.00
 11 1 12 0.46 0.00
 11 1 13 -4.95 0.00
 11 1 14 -0.02 0.00
 11 1 15 -3.86 0.00
 11 1 16 0.51 0.00
 11 1 17 -1.37 0.00
 11 3 0 -24.05 0.00
 11 3 1 -30.92 0.00
 11 3 2 -18.70 0.00
 11 3 3 5.64 0.00
 11 3 4 -2.47 0.00
 11 3 5 19.42 0.00
 11 3 6 -19.70 0.00
 11 3 7 0.05 0.00
 11 3 8 3.23 0.00
 11 3 9 -7.77 0.00
 11 3 10 -6.53 0.00
 11 3 11 -6.28 0.00
 11 3 12 -0.01 0.00
 11 3 13 -4.73 0.00
 11 3 14 0.31 0.00
 11 3 15 -2.83 0.00
 11 3 16 -2.12 0.00
 11 3 17 3.05 0.00
 11 3 18 4.84 0.00
 11 5 0 -19.39 0.00
 11 5 1 23.68 0.00
 11 5 2 -8.13 0.00
 11 5 3 37.14 0.00
 11 5 4 -1.59 0.00
 11 5 5 23.63 0.00
 11 5 6 0.68 0.00
 11 5 7 -3.56 0.00
 11 5 8 7.19 0.00
 11 5 9 -0.30 0.00
 11 5 10 -2.67 0.00
 11 5 11 11.01 0.00
 11 5 12 2.94 0.00
 11 5 13 2.59 0.00
 11 5 14 8.04 0.00
 11 5 15 0.08 0.00
 11 5 16 1.48 0.00
 11 5 17 4.72 0.00
 11 5 18 -2.17 0.00
 11 7 0 -33.36 0.00
 11 7 1 -16.52 0.00
 11 7 2 29.11 0.00
 11 7 3 -16.02 0.00
 11 7 4 10.66 0.00
 11 7 5 -7.13 0.00
 11 7 6 16.84 0.00
 11 7 7 -10.13 0.00
 11 7 8 10.43 0.00
 11 7 9 0.79 0.00
 11 7 10 0.63 0.00
 11 7 11 0.77 0.00
 11 7 12 -1.78 0.00
 11 7 13 0.34 0.00
 11 7 14 6.00 0.00
 11 7 15 -0.34 0.00
 11 7 16 -0.57 0.00
 11 7 17 0.74 0.00
 11 7 18 1.36 0.00
 11 9 0 -13.34 0.00
 11 9 1 1.58 0.00
 11 9 2 2.27 0.00
 11 9 3 11.15 0.00
 11 9 4 -8.77 0.00
 11 9 5 10.15 0.00
 11 9 6 5.97 0.00
 11 9 7 1.67 0.00
 11 9 8 -14.61 0.00
 11 9 9 6.38 0.00
 11 9 10 -6.02 0.00
 11 9 11 3.36 0.00
 11 9 12 -4.90 0.00
 11 9 13 2.37 0.00
 11 9 14 2.55 0.00
 11 9 15 -4.39 0.00
 11 9 16 0.29 0.00
 11 9 17 0.85 0.00
 11 11 0 -8.95 0.00
 11 11 1 0.00 0.00
 11 11 2 -5.22 0.00
 11 11 3 7.46 0.00
 11 11 4 2.53 0.00
 11 11 5 -0.09 0.00
 11 11 6 -7.63 0.00
 11 11 7 4.88 0.00
 11 11 8 -1.60 0.00
 11 11 9 1.58 0.00
 11 11 10 6.13 0.00
 11 11 11 -5.98 0.00
 11 11 12 6.34 0.00
 11 11 13 2.41 0.00
 11 11 14 3.93 0.00
 11 11 15 -1.67 0.00
 11 11 16 4.98 0.00
 11 11 17 7.18 0.00
 11 13 0 5.11 0.00
 11 13 1 -8.94 0.00
 11 13 2 -9.33 0.00
 11 13 3 5.83 0.00
 11 13 4 9.94 0.00
 11 13 5 -10.18 0.00
 11 13 6 -0.95 0.00
 11 13 7 -3.43 0.00
 11 13 8 1.73 0.00
 11 13 9 -4.51 0.00
 11 13 10 -3.52 0.00
 11 13 11 -1.99 0.00
 11 13 12 2.33 0.00
 11 13 13 0.84 0.00
 11 13 14 5.28 0.00
 11 13 15 -1.01 0.00
 11 13 16 1.59 0.00
 11 13 17 -1.10 0.00
 11 15 0 5.08 0.00
 11 15 1 2.36 0.00
 11 15 2 -20.07 0.00
 11 15 3 2.63 0.00
 11 15 4 9.29 0.00
 11 15 5 -6.83 0.00
 11 15 6 -3.92 0.00
 11 15 7 -4.63 0.00
 11 15 8 -3.92 0.00
 11 15 9 -2.48 0.00
 11 15 10 -6.95 0.00
 11 15 11 -3.50 0.00
 11 15 12 0.78 0.00
 11 15 13 -4.76 0.00
 11 15 14 -1.82 0.00
 11 15 15 -1.14 0.00
 11 15 16 -1.82 0.00
 11 15 17 -0.95 0.00
 11 17 0 8.11 0.00
 11 17 1 3.53 0.00
 11 17 2 15.15 0.00
 11 17 3 7.66 0.00
 11 17 4 5.70 0.00
 11 17 5 -4.46 0.00
 11 17 6 14.00 0.00
 11 17 7 3.59 0.00
 11 17 8 1.15 0.00
 11 17 9 -1.37 0.00
 11 17 10 3.79 0.00
 11 17 11 -0.69 0.00
 11 17 12 1.62 0.00
 11 17 13 -1.78 0.00
 11 17 14 -1.98 0.00
 11 17 15 0.95 0.00
 11 17 16 -3.31 0.00
 11 17 17 2.03 0.00
 11 19 0 6.64 0.00
 11 19 1 9.94 0.00
 11 19 2 -4.28 0.00
 11 19 3 10.08 0.00
 11 19 4 6.01 0.00
 11 19 5 14.10 0.00
 11 19 6 8.07 0.00
 11 19 7 0.73 0.00
 11 19 8 4.27 0.00
 11 19 9 3.41 0.00
 11 19 10 0.97 0.00
 11 19 11 -1.77 0.00
 11 19 12 -2.65 0.00
 11 19 13 0.18 0.00
 11 19 14 -5.14 0.00
 11 19 15 1.62 0.00
 11 19 16 1.97 0.00
 11 21 0 12.27 0.00
 11 21 1 -13.25 0.00
 11 21 2 -2.13 0.00
 11 21 3 -5.53 0.00
 11 21 4 -10.85 0.00
 11 21 5 0.09 0.00
 11 21 6 -6.10 0.00
 11 21 7 5.02 0.00
 11 21 8 -5.89 0.00
 11 21 9 2.80 0.00
 11 21 10 -3.51 0.00
 11 21 11 3.56 0.00
 11 21 12 -0.90 0.00
 11 21 13 -2.77 0.00
 11 21 14 -0.78 0.00
 11 21 15 -4.77 0.00
 11 21 16 3.07 0.00
 11 23 0 -1.92 0.00
 11 23 1 -6.69 0.00
 11 23 2 -5.49 0.00
 11 23 3 -5.48 0.00
 11 23 4 -6.28 0.00
 11 23 5 -7.80 0.00
 11 23 6 -6.24 0.00
 11 23 7 -12.84 0.00
 11 23 8 -4.98 0.00
 11 23 9 -1.42 0.00
 11 23 10 -0.89 0.00
 11 23 11 2.29 0.00
 11 23 12 -1.95 0.00
 11 23 13 3.83 0.00
 11 23 14 0.62 0.00
 11 23 15 -1.01 0.00
 11 23 16 9.50 0.00
 11 25 0 10.40 0.00
 11 25 1 -4.21 0.00
 11 25 2 3.00 0.00
 11 25 3 -9.97 0.00
 11 25 4 -1.07 0.00
 11 25 5 -7.70 0.00
 11 25 6 1.96 0.00
 11 25 7 -9.24 0.00
 11 25 8 2.06 0.00
 11 25 9 -0.31 0.00
 11 25 10 5.89 0.00
 11 25 11 -2.81 0.00
 11 25 12 0.83 0.00
 11 25 13 0.98 0.00
 11 25 14 1.43 0.00
 11 25 15 2.60 0.00
 11 27 0 -10.16 0.00
 11 27 1 -5.07 0.00
 11 27 2 -5.50 0.00
 11 27 3 -4.60 0.00
 11 27 4 -11.38 0.00
 11 27 5 0.72 0.00
 11 27 6 -1.91 0.00
 11 27 7 -4.18 0.00
 11 27 8 -2.93 0.00
 11 27 9 8.60 0.00
 11 27 10 0.47 0.00
 11 27 11 4.59 0.00
 11 27 12 -3.33 0.00
 11 27 13 2.82 0.00
 11 27 14 -2.48 0.00
 11 29 0 4.56 0.00
 11 29 1 2.56 0.00
 11 29 2 0.28 0.00
 11 29 3 1.55 0.00
 11 29 4 -1.31 0.00
 11 29 5 -3.21 0.00
 11 29 6 -1.29 0.00
 11 29 7 -5.82 0.00
 11 29 8 2.77 0.00
 11 29 9 -0.15 0.00
 11 29 10 -2.61 0.00
 11 29 11 2.29 0.00
 11 29 12 0.12 0.00
 11 29 13 -1.37 0.00
 11 29 14 3.01 0.00
 11 31 0 3.76 0.00
 11 31 1 5.76 0.00
 11 31 2 5.87 0.00
 11 31 3 5.63 0.00
 11 31 4 1.70 0.00
 11 31 5 1.48 0.00
 11 31 6 2.38 0.00
 11 31 7 3.42 0.00
 11 31 8 3.37 0.00
 11 31 9 -1.25 0.00
 11 31 10 -3.30 0.00
 11 31 11 -6.64 0.00
 11 31 12 -0.58 0.00
 11 31 13 0.93 0.00
 11 33 0 6.11 0.00
 11 33 1 -0.65 0.00
 11 33 2 7.38 0.00
 11 33 3 2.68 0.00
 11 33 4 4.53 0.00
 11 33 5 -1.85 0.00
 11 33 6 -1.82 0.00
 11 33 7 0.00 0.00
 11 33 8 -0.59 0.00
 11 33 9 -0.06 0.00
 11 33 10 -0.59 0.00
 11 33 11 3.61 0.00
 11 33 12 1.29 0.00
 11 35 0 -4.42 0.00
 11 35 1 -3.83 0.00
 11 35 2 2.18 0.00
 11 35 3 -2.50 0.00
 11 35 4 -5.62 0.00
 11 35 5 -0.33 0.00
 11 35 6 -1.11 0.00
 11 35 7 -3.93 0.00
 11 35 8 -1.75 0.00
 11 35 9 -4.78 0.00
 11 35 10 0.58 0.00
 11 35 11 -5.20 0.00
 11 37 0 -2.55 0.00
 11 37 1 -4.66 0.00
 11 37 2 -0.35 0.00
 11 37 3 -3.47 0.00
 11 37 4 -1.31 0.00
 11 37 5 -1.33 0.00
 11 37 6 -3.13 0.00
 11 37 7 -0.75 0.00
 11 37 8 1.21 0.00
 11 37 9 1.58 0.00
 11 37 10 -0.84 0.00
 11 39 0 -1.45 0.00
 11 39 1 1.27 0.00
 11 39 2 1.22 0.00
 11 39 3 0.20 0.00
 11 39 4 2.43 0.00
 11 39 5 3.11 0.00
 11 39 6 3.18 0.00
 11 39 7 -6.36 0.00
 11 39 8 2.85 0.00
 11 39 9 -3.11 0.00
 11 41 0 1.22 0.00
 11 41 1 -2.95 0.00
 11 41 2 -1.69 0.00
 11 41 3 -4.65 0.00
 11 41 4 3.31 0.00
 11 41 5 0.35 0.00
 11 41 6 -2.87 0.00
 11 41 7 -0.79 0.00
 11 43 1 -1.99 0.00
 11 43 2 2.62 0.00
 11 43 3 -0.74 0.00
 11 43 4 0.47 0.00
 11 43 5 2.33 0.00
 11 43 6 10.99 0.00
 11 45 0 5.27 0.00
 11 45 1 7.14 0.00
 11 45 2 5.27 0.00
 11 45 3 4.13 0.00
 12 0 0 54.56 0.00
 12 0 1 1.42 0.00
 12 0 2 15.87 0.00
 12 0 3 9.96 0.00
 12 0 4 11.54 0.00
 12 0 5 10.86 0.00
 12 0 6 9.12 0.00
 12 0 7 -3.10 0.00
 12 0 8 17.38 0.00
 12 0 9 -9.57 0.00
 12 0 10 8.51 0.00
 12 0 11 -0.36 0.00
 12 0 12 3.39 0.00
 12 0 13 -0.17 0.00
 12 0 14 -5.40 0.00
 12 0 15 3.26 0.00
 12 0 16 4.53 0.00
 12 2 0 -7.95 0.00
 12 2 1 5.76 0.00
 12 2 2 -14.83 0.00
 12 2 3 -5.36 0.00
 12 2 4 4.90 0.00
 12 2 5 33.62 0.00
 12 2 6 -5.01 0.00
 12 2 7 15.63 0.00
 12 2 8 12.30 0.00
 12 2 9 -1.79 0.00
 12 2 10 -0.03 0.00
 12 2 11 3.21 0.00
 12 2 12 -1.93 0.00
 12 2 13 -4.77 0.00
 12 2 14 -0.96 0.00
 12 2 15 -0.06 0.00
 12 2 16 5.40 0.00
 12 2 17 -3.34 0.00
 12 4 0 -38.90 0.00
 12 4 1 -8.09 0.00
 12 4 2 23.68 0.00
 12 4 3 -5.41 0.00
 12 4 4 -23.26 0.00
 12 4 5 -1.53 0.00
 12 4 6 -11.83 0.00
 12 4 7 -9.97 0.00
 12 4 8 -3.59 0.00
 12 4 9 -5.32 0.00
 12 4 10 -4.54 0.00
 12 4 11 1.08 0.00
 12 4 12 1.23 0.00
 12 4 13 -5.12 0.00
 12 4 14 0.26 0.00
 12 4 15 2.30 0.00
 12 4 16 -3.17 0.00
 12 4 17 -1.38 0.00
 12 6 0 12.75 0.00
 12 6 1 2.51 0.00
 12 6 2 14.75 0.00
 12 6 3 -13.85 0.00
 12 6 4 -8.25 0.00
 12 6 5 -1.84 0.00
 12 6 6 6.60 0.00
 12 6 7 -4.13 0.00
 12 6 8 -1.96 0.00
 12 6 9 2.02 0.00
 12 6 10 -1.13 0.00
 12 6 11 -2.62 0.00
 12 6 12 -6.80 0.00
 12 6 13 -1.98 0.00
 12 6 14 -0.52 0.00
 12 6 15 -2.35 0.00
 12 6 16 0.93 0.00
 12 6 17 2.20 0.00
 12 8 0 -40.09 0.00
 12 8 1 -4.67 0.00
 12 8 2 3.91 0.00
 12 8 3 -2.95 0.00
 12 8 4 -10.46 0.00
 12 8 5 -4.18 0.00
 12 8 6 -5.95 0.00
 12 8 7 -10.17 0.00
 12 8 8 -3.81 0.00
 12 8 9 3.12 0.00
 12 8 10 0.63 0.00
 12 8 11 -1.03 0.00
 12 8 12 -2.23 0.00
 12 8 13 0.13 0.00
 12 8 14 4.22 0.00
 12 8 15 -3.61 0.00
 12 8 16 0.64 0.00
 12 8 17 -0.18 0.00
 12 10 0 -2.23 0.00
 12 10 1 4.02 0.00
 12 10 2 -5.10 0.00
 12 10 3 -6.21 0.00
 12 10 4 -3.76 0.00
 12 10 5 -6.12 0.00
 12 10 6 -3.93 0.00
 12 10 7 -2.21 0.00
 12 10 8 4.83 0.00
 12 10 9 -0.06 0.00
 12 10 10 4.81 0.00
 12 10 11 0.09 0.00
 12 10 12 1.08 0.00
 12 10 13 2.18 0.00
 12 10 14 1.03 0.00
 12 10 15 -0.92 0.00
 12 10 16 -2.88 0.00
 12 10 17 -0.21 0.00
 12 12 0 12.37 0.00
 12 12 1 19.35 0.00
 12 12 2 12.02 0.00
 12 12 3 -7.27 0.00
 12 12 4 6.86 0.00
 12 12 5 -8.51 0.00
 12 12 6 -6.25 0.00
 12 12 7 -0.96 0.00
 12 12 8 0.44 0.00
 12 12 9 1.12 0.00
 12 12 10 14.69 0.00
 12 12 11 4.85 0.00
 12 12 12 0.17 0.00
 12 12 13 3.93 0.00
 12 12 14 2.22 0.00
 12 12 15 3.52 0.00
 12 12 16 2.01 0.00
 12 12 17 4.48 0.00
 12 14 0 7.26 0.00
 12 14 1 7.86 0.00
 12 14 2 7.84 0.00
 12 14 3 -2.81 0.00
 12 14 4 -0.18 0.00
 12 14 5 -2.18 0.00
 12 14 6 3.09 0.00
 12 14 7 0.45 0.00
 12 14 8 0.23 0.00
 12 14 9 2.89 0.00
 12 14 10 2.00 0.00
 12 14 11 4.13 0.00
 12 14 12 -0.21 0.00
 12 14 13 3.35 0.00
 12 14 14 -3.24 0.00
 12 14 15 2.37 0.00
 12 14 16 -4.97 0.00
 12 14 17 1.40 0.00
 12 16 0 18.44 0.00
 12 16 1 8.86 0.00
 12 16 2 -10.15 0.00
 12 16 3 -3.73 0.00
 12 16 4 2.19 0.00
 12 16 5 -14.50 0.00
 12 16 6 -5.48 0.00
 12 16 7 -4.12 0.00
 12 16 8 -4.35 0.00
 12 16 9 2.13 0.00
 12 16 10 2.99 0.00
 12 16 11 1.45 0.00
 12 16 12 -1.44 0.00
 12 16 13 -1.03 0.00
 12 16 14 -2.17 0.00
 12 16 15 -4.05 0.00
 12 16 16 4.16 0.00
 12 16 17 -3.99 0.00
 12 18 0 10.95 0.00
 12 18 1 -5.34 0.00
 12 18 2 8.56 0.00
 12 18 3 -5.03 0.00
 12 18 4 0.43 0.00
 12 18 5 -2.26 0.00
 12 18 6 5.97 0.00
 12 18 7 -5.17 0.00
 12 18 8 -0.45 0.00
 12 18 9 -2.01 0.00
 12 18 10 0.94 0.00
 12 18 11 -4.34 0.00
 12 18 12 0.89 0.00
 12 18 13 -1.59 0.00
 12 18 14 1.75 0.00
 12 18 15 5.33 0.00
 12 18 16 -2.59 0.00
 12 20 0 2.58 0.00
 12 20 1 -11.07 0.00
 12 20 2 -18.30 0.00
 12 20 3 -6.46 0.00
 12 20 4 -7.14 0.00
 12 20 5 0.99 0.00
 12 20 6 5.55 0.00
 12 20 7 -2.13 0.00
 12 20 8 -5.41 0.00
 12 20 9 1.00 0.00
 12 20 10 -3.19 0.00
 12 20 11 -1.63 0.00
 12 20 12 -2.40 0.00
 12 20 13 -2.79 0.00
 12 20 14 -5.71 0.00
 12 20 15 1.87 0.00
 12 20 16 -1.82 0.00
 12 22 0 -11.76 0.00
 12 22 1 -26.10 0.00
 12 22 2 -2.55 0.00
 12 22 3 -8.58 0.00
 12 22 4 -8.11 0.00
 12 22 5 7.77 0.00
 12 22 6 6.08 0.00
 12 22 7 0.05 0.00
 12 22 8 -5.35 0.00
 12 22 9 1.51 0.00
 12 22 10 -0.60 0.00
 12 22 11 -0.10 0.00
 12 22 12 -2.87 0.00
 12 22 13 -2.70 0.00
 12 22 14 1.77 0.00
 12 22 15 3.17 0.00
 12 22 16 0.96 0.00
 12 24 0 11.10 0.00
 12 24 1 -1.64 0.00
 12 24 2 -2.91 0.00
 12 24 3 5.89 0.00
 12 24 4 4.15 0.00
 12 24 5 5.12 0.00
 12 24 6 5.13 0.00
 12 24 7 3.55 0.00
 12 24 8 -3.29 0.00
 12 24 9 1.83 0.00
 12 24 10 7.57 0.00
 12 24 11 1.96 0.00
 12 24 12 -1.85 0.00
 12 24 13 2.53 0.00
 12 24 14 2.38 0.00
 12 24 15 1.40 0.00
 12 26 0 12.71 0.00
 12 26 1 0.03 0.00
 12 26 2 5.06 0.00
 12 26 3 -4.32 0.00
 12 26 4 2.34 0.00
 12 26 5 -1.08 0.00
 12 26 6 5.10 0.00
 12 26 7 1.96 0.00
 12 26 8 -4.14 0.00
 12 26 9 2.26 0.00
 12 26 10 1.23 0.00
 12 26 11 -0.09 0.00
 12 26 12 2.88 0.00
 12 26 13 -0.32 0.00
 12 26 14 3.91 0.00
 12 28 0 11.08 0.00
 12 28 1 4.26 0.00
 12 28 2 0.92 0.00
 12 28 3 1.22 0.00
 12 28 4 -0.69 0.00
 12 28 5 -0.73 0.00
 12 28 6 -14.00 0.00
 12 28 7 -3.63 0.00
 12 28 8 3.70 0.00
 12 28 9 5.13 0.00
 12 28 10 0.67 0.00
 12 28 11 3.01 0.00
 12 28 12 0.74 0.00
 12 28 13 -0.61 0.00
 12 28 14 -0.45 0.00
 12 30 0 3.80 0.00
 12 30 1 8.95 0.00
 12 30 2 0.41 0.00
 12 30 3 -6.88 0.00
 12 30 4 -3.19 0.00
 12 30 5 -4.30 0.00
 12 30 6 -3.11 0.00
 12 30 7 -6.10 0.00
 12 30 8 -3.46 0.00
 12 30 9 2.28 0.00
 12 30 10 -3.57 0.00
 12 30 11 2.21 0.00
 12 30 12 5.99 0.00
 12 30 13 1.04 0.00
 12 32 0 6.14 0.00
 12 32 1 2.79 0.00
 12 32 2 1.94 0.00
 12 32 3 1.41 0.00
 12 32 4 -1.23 0.00
 12 32 5 -2.87 0.00
 12 32 6 -1.47 0.00
 12 32 7 0.86 0.00
 12 32 8 -0.80 0.00
 12 32 9 0.71 0.00
 12 32 10 -3.39 0.00
 12 32 11 -3.13 0.00
 12 32 12 -6.72 0.00
 12 34 0 -4.88 0.00
 12 34 1 -0.18 0.00
 12 34 2 0.20 0.00
 12 34 3 3.30 0.00
 12 34 4 -6.51 0.00
 12 34 5 9.45 0.00
 12 34 6 -2.28 0.00
 12 34 7 1.08 0.00
 12 34 8 -5.30 0.00
 12 34 9 -4.24 0.00
 12 34 10 -4.42 0.00
 12 34 11 -6.63 0.00
 12 36 0 -1.08 0.00
 12 36 1 1.52 0.00
 12 36 2 2.05 0.00
 12 36 3 1.60 0.00
 12 36 4 5.91 0.00
 12 36 5 1.59 0.00
 12 36 6 4.30 0.00
 12 36 7 -4.68 0.00
 12 36 8 1.91 0.00
 12 36 9 2.22 0.00
 12 36 10 -0.29 0.00
 12 38 0 -1.81 0.00
 12 38 1 1.41 0.00
 12 38 2 3.30 0.00
 12 38 3 0.12 0.00
 12 38 4 2.56 0.00
 12 38 5 4.70 0.00
 12 38 6 -0.99 0.00
 12 38 7 -3.51 0.00
 12 38 8 -0.47 0.00
 12 38 9 -0.56 0.00
 12 40 0 -6.31 0.00
 12 40 1 -0.34 0.00
 12 40 2 -1.08 0.00
 12 40 3 3.10 0.00
 12 40 4 -1.43 0.00
 12 40 5 0.74 0.00
 12 40 6 -4.16 0.00
 12 40 7 -1.43 0.00
 12 40 8 -8.61 0.00
 12 42 0 -6.39 0.00
 12 42 1 -4.61 0.00
 12 42 2 -2.80 0.00
 12 42 3 1.22 0.00
 12 42 4 0.45 0.00
 12 42 5 3.53 0.00
 12 42 6 -1.50 0.00
 12 44 0 0.23 0.00
 12 44 1 -3.54 0.00
 12 44 2 0.87 0.00
 12 44 3 1.57 0.00
 12 44 4 8.68 0.00
 13 1 0 3.58 0.00
 13 1 1 17.97 0.00
 13 1 2 14.41 0.00
 13 1 3 -2.78 0.00
 13 1 4 11.87 0.00
 13 1 5 -10.63 0.00
 13 1 6 -2.19 0.00
 13 1 7 -1.53 0.00
 13 1 8 5.84 0.00
 13 1 9 4.46 0.00
 13 1 10 -3.02 0.00
 13 1 11 7.42 0.00
 13 1 12 0.08 0.00
 13 1 13 3.76 0.00
 13 1 14 -2.56 0.00
 13 1 15 2.04 0.00
 13 1 16 -1.91 0.00
 13 1 17 -6.05 0.00
 13 3 0 7.06 0.00
 13 3 1 5.23 0.00
 13 3 2 2.93 0.00
 13 3 3 -17.42 0.00
 13 3 4 8.82 0.00
 13 3 5 1.87 0.00
 13 3 6 -4.37 0.00
 13 3 7 0.40 0.00
 13 3 8 10.60 0.00
 13 3 9 -2.60 0.00
 13 3 10 -1.02 0.00
 13 3 11 -0.23 0.00
 13 3 12 -0.08 0.00
 13 3 13 -0.71 0.00
 13 3 14 -3.89 0.00
 13 3 15 -1.98 0.00
 13 3 16 -1.14 0.00
 13 3 17 -3.69 0.00
 13 5 0 19.00 0.00
 13 5 1 11.86 0.00
 13 5 2 2.21 0.00
 13 5 3 1.39 0.00
 13 5 4 -13.28 0.00
 13 5 5 -5.68 0.00
 13 5 6 -5.83 0.00
 13 5 7 -1.59 0.00
 13 5 8 -2.92 0.00
 13 5 9 -2.05 0.00
 13 5 10 -9.43 0.00
 13 5 11 4.22 0.00
 13 5 12 -4.35 0.00
 13 5 13 0.92 0.00
 13 5 14 -0.37 0.00
 13 5 15 -2.95 0.00
 13 5 16 0.35 0.00
 13 5 17 -0.05 0.00
 13 7 0 6.70 0.00
 13 7 1 -15.39 0.00
 13 7 2 6.31 0.00
 13 7 3 -21.73 0.00
 13 7 4 -14.11 0.00
 13 7 5 -15.50 0.00
 13 7 6 2.35 0.00
 13 7 7 -5.57 0.00
 13 7 8 1.66 0.00
 13 7 9 -0.94 0.00
 13 7 10 1.73 0.00
 13 7 11 -2.76 0.00
 13 7 12 -5.26 0.00
 13 7 13 0.54 0.00
 13 7 14 3.40 0.00
 13 7 15 0.39 0.00
 13 7 16 0.64 0.00
 13 7 17 -1.35 0.00
 13 9 0 10.50 0.00
 13 9 1 7.55 0.00
 13 9 2 -3.93 0.00
 13 9 3 -14.70 0.00
 13 9 4 -13.72 0.00
 13 9 5 -3.94 0.00
 13 9 6 10.15 0.00
 13 9 7 0.56 0.00
 13 9 8 1.48 0.00
 13 9 9 1.20 0.00
 13 9 10 5.98 0.00
 13 9 11 1.34 0.00
 13 9 12 1.49 0.00
 13 9 13 2.56 0.00
 13 9 14 3.22 0.00
 13 9 15 -3.00 0.00
 13 9 16 -2.17 0.00
 13 9 17 3.38 0.00
 13 11 0 18.30 0.00
 13 11 1 13.57 0.00
 13 11 2 5.22 0.00
 13 11 3 6.38 0.00
 13 11 4 4.63 0.00
 13 11 5 6.00 0.00
 13 11 6 -4.84 0.00
 13 11 7 6.50 0.00
 13 11 8 9.28 0.00
 13 11 9 1.64 0.00
 13 11 10 7.31 0.00
 13 11 11 -9.84 0.00
 13 11 12 2.49 0.00
 13 11 13 2.52 0.00
 13 11 14 -1.67 0.00
 13 11 15 2.45 0.00
 13 11 16 0.74 0.00
 13 11 17 5.92 0.00
 13 13 0 12.74 0.00
 13 13 1 1.54 0.00
 13 13 2 4.64 0.00
 13 13 3 -6.16 0.00
 13 13 4 6.54 0.00
 13 13 5 0.45 0.00
 13 13 6 -4.02 0.00
 13 13 7 0.84 0.00
 13 13 8 6.22 0.00
 13 13 9 -3.15 0.00
 13 13 10 -4.75 0.00
 13 13 11 -0.64 0.00
 13 13 12 -9.90 0.00
 13 13 13 3.72 0.00
 13 13 14 -3.07 0.00
 13 13 15 0.30 0.00
 13 13 16 0.42 0.00
 13 13 17 -6.51 0.00
 13 15 0 3.01 0.00
 13 15 1 1.46 0.00
 13 15 2 -16.75 0.00
 13 15 3 2.57 0.00
 13 15 4 -0.05 0.00
 13 15 5 0.15 0.00
 13 15 6 -7.35 0.00
 13 15 7 -0.60 0.00
 13 15 8 2.79 0.00
 13 15 9 3.08 0.00
 13 15 10 -3.27 0.00
 13 15 11 1.83 0.00
 13 15 12 -1.28 0.00
 13 15 13 -1.68 0.00
 13 15 14 3.39 0.00
 13 15 15 -1.98 0.00
 13 15 16 5.72 0.00
 13 17 0 -10.43 0.00
 13 17 1 0.98 0.00
 13 17 2 4.88 0.00
 13 17 3 1.39 0.00
 13 17 4 -17.86 0.00
 13 17 5 -1.22 0.00
 13 17 6 -7.95 0.00
 13 17 7 3.42 0.00
 13 17 8 -6.52 0.00
 13 17 9 3.39 0.00
 13 17 10 -0.36 0.00
 13 17 11 2.69 0.00
 13 17 12 -1.73 0.00
 13 17 13 2.35 0.00
 13 17 14 10.61 0.00
 13 17 15 0.18 0.00
 13 17 16 -1.14 0.00
 13 19 0 -0.31 0.00
 13 19 1 -5.82 0.00
 13 19 2 2.81 0.00
 13 19 3 -4.35 0.00
 13 19 4 4.93 0.00
 13 19 5 -7.82 0.00
 13 19 6 -0.27 0.00
 13 19 7 -14.09 0.00
 13 19 8 -1.69 0.00
 13 19 9 -0.41 0.00
 13 19 10 -1.79 0.00
 13 19 11 -4.48 0.00
 13 19 12 -1.35 0.00
 13 19 13 -0.67 0.00
 13 19 14 -0.06 0.00
 13 19 15 1.14 0.00
 13 19 16 -4.76 0.00
 13 21 0 9.52 0.00
 13 21 1 -12.22 0.00
 13 21 2 2.98 0.00
 13 21 3 -6.20 0.00
 13 21 4 -6.31 0.00
 13 21 5 -7.85 0.00
 13 21 6 1.54 0.00
 13 21 7 4.89 0.00
 13 21 8 4.23 0.00
 13 21 9 -2.08 0.00
 13 21 10 0.51 0.00
 13 21 11 -3.35 0.00
 13 21 12 4.71 0.00
 13 21 13 2.66 0.00
 13 21 14 -2.56 0.00
 13 21 15 -0.68 0.00
 13 23 0 -19.41 0.00
 13 23 1 7.65 0.00
 13 23 2 -5.11 0.00
 13 23 3 13.99 0.00
 13 23 4 -0.87 0.00
 13 23 5 1.80 0.00
 13 23 6 4.54 0.00
 13 23 7 5.02 0.00
 13 23 8 0.61 0.00
 13 23 9 4.78 0.00
 13 23 10 -0.13 0.00
 13 23 11 0.36 0.00
 13 23 12 -0.48 0.00
 13 23 13 1.90 0.00
 13 23 14 1.81 0.00
 13 23 15 -2.46 0.00
 13 25 0 14.18 0.00
 13 25 1 6.14 0.00
 13 25 2 3.61 0.00
 13 25 3 10.91 0.00
 13 25 4 7.73 0.00
 13 25 5 16.21 0.00
 13 25 6 12.13 0.00
 13 25 7 15.68 0.00
 13 25 8 6.50 0.00
 13 25 9 2.36 0.00
 13 25 10 1.87 0.00
 13 25 11 -7.00 0.00
 13 25 12 2.18 0.00
 13 25 13 -3.31 0.00
 13 25 14 0.64 0.00
 13 27 0 -4.43 0.00
 13 27 1 3.50 0.00
 13 27 2 -2.20 0.00
 13 27 3 8.66 0.00
 13 27 4 3.34 0.00
 13 27 5 16.60 0.00
 13 27 6 5.94 0.00
 13 27 7 8.60 0.00
 13 27 8 2.41 0.00
 13 27 9 2.37 0.00
 13 27 10 -1.84 0.00
 13 27 11 -2.30 0.00
 13 27 12 -1.65 0.00
 13 27 13 -0.77 0.00
 13 27 14 2.01 0.00
 13 29 0 7.22 0.00
 13 29 1 0.41 0.00
 13 29 2 -1.91 0.00
 13 29 3 -3.35 0.00
 13 29 4 4.35 0.00
 13 29 5 -0.58 0.00
 13 29 6 -1.09 0.00
 13 29 7 -4.68 0.00
 13 29 8 1.61 0.00
 13 29 9 -6.29 0.00
 13 29 10 0.02 0.00
 13 29 11 1.75 0.00
 13 29 12 3.88 0.00
 13 29 13 -3.10 0.00
 13 31 0 -0.80 0.00
 13 31 1 -1.18 0.00
 13 31 2 -2.86 0.00
 13 31 3 -3.31 0.00
 13 31 4 -3.82 0.00
 13 31 5 -1.95 0.00
 13 31 6 -6.88 0.00
 13 31 7 -1.40 0.00
 13 31 8 1.24 0.00
 13 31 9 -3.16 0.00
 13 31 10 -0.50 0.00
 13 31 11 -0.37 0.00
 13 31 12 1.59 0.00
 13 33 0 -3.65 0.00
 13 33 1 6.59 0.00
 13 33 2 -8.42 0.00
 13 33 3 1.39 0.00
 13 33 4 -8.06 0.00
 13 33 5 1.64 0.00
 13 33 6 -5.96 0.00
 13 33 7 2.17 0.00
 13 33 8 -5.27 0.00
 13 33 9 6.09 0.00
 13 33 10 -4.21 0.00
 13 35 0 3.07 0.00
 13 35 1 -0.37 0.00
 13 35 2 4.44 0.00
 13 35 3 2.69 0.00
 13 35 4 -3.54 0.00
 13 35 5 2.04 0.00
 13 35 6 4.48 0.00
 13 35 7 -1.29 0.00
 13 35 8 0.15 0.00
 13 35 9 -3.49 0.00
 13 35 10 -0.24 0.00
 13 37 0 4.87 0.00
 13 37 1 -0.01 0.00
 13 37 2 4.72 0.00
 13 37 3 -6.22 0.00
 13 37 4 3.92 0.00
 13 37 5 -3.11 0.00
 13 37 6 5.04 0.00
 13 37 7 1.76 0.00
 13 37 8 3.42 0.00
 13 37 9 -1.27 0.00
 13 39 0 -1.99 0.00
 13 39 1 -0.62 0.00
 13 39 2 -3.48 0.00
 13 39 3 -1.13 0.00
 13 39 4 -0.36 0.00
 13 39 5 4.26 0.00
 13 39 6 -1.18 0.00
 13 39 7 -2.35 0.00
 13 39 8 -0.53 0.00
 13 41 0 3.75 0.00
 13 41 1 -0.48 0.00
 13 41 2 -2.32 0.00
 13 41 3 -3.05 0.00
 13 41 4 1.77 0.00
 13 41 5 2.82 0.00
 13 41 6 -2.50 0.00
 13 43 0 1.99 0.00
 13 43 1 0.33 0.00
 13 43 2 2.37 0.00
 13 43 3 1.91 0.00
 13 43 4 -1.66 0.00
 14 0 0 57.37 0.00
 14 0 1 -13.02 0.00
 14 0 2 -8.55 0.00
 14 0 3 -22.82 0.00
 14 0 4 -9.45 0.00
 14 0 5 -19.42 0.00
 14 0 6 -12.03 0.00
 14 0 7 -9.77 0.00
 14 0 8 -13.07 0.00
 14 0 9 3.09 0.00
 14 0 10 2.45 0.00
 14 0 11 2.85 0.00
 14 0 12 6.09 0.00
 14 0 13 4.82 0.00
 14 0 14 -2.88 0.00
 14 0 15 8.99 0.00
 14 0 16 5.92 0.00
 14 2 0 0.75 0.00
 14 2 1 8.57 0.00
 14 2 2 -9.34 0.00
 14 2 3 7.69 0.00
 14 2 4 4.30 0.00
 14 2 5 5.02 0.00
 14 2 6 -7.98 0.00
 14 2 7 12.31 0.00
 14 2 8 -1.18 0.00
 14 2 9 5.92 0.00
 14 2 10 -4.93 0.00
 14 2 11 4.57 0.00
 14 2 12 0.41 0.00
 14 2 13 -1.76 0.00
 14 2 14 -1.40 0.00
 14 2 15 1.77 0.00
 14 2 16 5.68 0.00
 14 2 17 -7.07 0.00
 14 4 0 -4.03 0.00
 14 4 1 4.94 0.00
 14 4 2 -0.09 0.00
 14 4 3 -2.24 0.00
 14 4 4 -5.22 0.00
 14 4 5 -2.78 0.00
 14 4 6 7.56 0.00
 14 4 7 -4.33 0.00
 14 4 8 11.70 0.00
 14 4 9 0.20 0.00
 14 4 10 -0.36 0.00
 14 4 11 2.07 0.00
 14 4 12 2.72 0.00
 14 4 13 -3.84 0.00
 14 4 14 -0.28 0.00
 14 4 15 1.15 0.00
 14 4 16 -0.57 0.00
 14 4 17 -3.41 0.00
 14 6 0 1.37 0.00
 14 6 1 -3.54 0.00
 14 6 2 1.16 0.00
 14 6 3 -3.27 0.00
 14 6 4 2.52 0.00
 14 6 5 -0.77 0.00
 14 6 6 14.76 0.00
 14 6 7 2.37 0.00
 14 6 8 7.83 0.00
 14 6 9 -0.58 0.00
 14 6 10 3.26 0.00
 14 6 11 -0.71 0.00
 14 6 12 -0.42 0.00
 14 6 13 0.35 0.00
 14 6 14 -0.44 0.00
 14 6 15 -0.52 0.00
 14 6 16 3.68 0.00
 14 6 17 0.37 0.00
 14 8 0 -16.84 0.00
 14 8 1 1.10 0.00
 14 8 2 -5.05 0.00
 14 8 3 6.96 0.00
 14 8 4 -0.44 0.00
 14 8 5 10.23 0.00
 14 8 6 -8.90 0.00
 14 8 7 9.95 0.00
 14 8 8 -6.37 0.00
 14 8 9 1.65 0.00
 14 8 10 -4.49 0.00
 14 8 11 -0.21 0.00
 14 8 12 -2.93 0.00
 14 8 13 2.00 0.00
 14 8 14 0.44 0.00
 14 8 15 -2.72 0.00
 14 8 16 1.13 0.00
 14 8 17 1.71 0.00
 14 10 0 6.23 0.00
 14 10 1 -8.08 0.00
 14 10 2 -3.60 0.00
 14 10 3 5.69 0.00
 14 10 4 -2.15 0.00
 14 10 5 8.48 0.00
 14 10 6 -4.48 0.00
 14 10 7 8.14 0.00
 14 10 8 -2.84 0.00
 14 10 9 -7.16 0.00
 14 10 10 -0.31 0.00
 14 10 11 -2.10 0.00
 14 10 12 4.20 0.00
 14 10 13 2.25 0.00
 14 10 14 -4.91 0.00
 14 10 15 -0.45 0.00
 14 10 16 -1.03 0.00
 14 10 17 -1.52 0.00
 14 12 0 -2.97 0.00
 14 12 1 -5.24 0.00
 14 12 2 -4.04 0.00
 14 12 3 -6.03 0.00
 14 12 4 6.83 0.00
 14 12 5 -1.26 0.00
 14 12 6 -3.57 0.00
 14 12 7 5.16 0.00
 14 12 8 -0.23 0.00
 14 12 9 -7.06 0.00
 14 12 10 5.94 0.00
 14 12 11 -3.80 0.00
 14 12 12 0.20 0.00
 14 12 13 -3.49 0.00
 14 12 14 -2.67 0.00
 14 12 15 -3.94 0.00
 14 12 16 4.82 0.00
 14 14 0 -8.82 0.00
 14 14 1 -3.85 0.00
 14 14 2 3.88 0.00
 14 14 3 3.51 0.00
 14 14 4 2.61 0.00
 14 14 5 10.23 0.00
 14 14 6 9.50 0.00
 14 14 7 0.22 0.00
 14 14 8 2.53 0.00
 14 14 9 -3.46 0.00
 14 14 10 -6.78 0.00
 14 14 11 -2.03 0.00
 14 14 12 4.72 0.00
 14 14 13 -4.01 0.00
 14 14 14 0.96 0.00
 14 14 15 -3.03 0.00
 14 14 16 3.65 0.00
 14 16 0 -4.68 0.00
 14 16 1 -2.37 0.00
 14 16 2 -7.53 0.00
 14 16 3 -3.74 0.00
 14 16 4 11.13 0.00
 14 16 5 -5.79 0.00
 14 16 6 3.30 0.00
 14 16 7 2.20 0.00
 14 16 8 5.01 0.00
 14 16 9 -1.30 0.00
 14 16 10 -1.15 0.00
 14 16 11 4.77 0.00
 14 16 12 1.23 0.00
 14 16 13 -1.03 0.00
 14 16 14 1.13 0.00
 14 16 15 0.60 0.00
 14 16 16 7.33 0.00
 14 18 0 -7.10 0.00
 14 18 1 2.28 0.00
 14 18 2 5.96 0.00
 14 18 3 1.74 0.00
 14 18 4 -4.51 0.00
 14 18 5 -0.29 0.00
 14 18 6 -3.74 0.00
 14 18 7 -0.39 0.00
 14 18 8 3.44 0.00
 14 18 9 -1.67 0.00
 14 18 10 -3.55 0.00
 14 18 11 2.99 0.00
 14 18 12 -1.36 0.00
 14 18 13 2.68 0.00
 14 18 14 0.95 0.00
 14 18 15 6.63 0.00
 14 18 16 -1.22 0.00
 14 20 0 -8.82 0.00
 14 20 1 10.47 0.00
 14 20 2 -5.72 0.00
 14 20 3 -1.91 0.00
 14 20 4 -4.62 0.00
 14 20 5 -4.66 0.00
 14 20 6 -2.20 0.00
 14 20 7 0.75 0.00
 14 20 8 -2.48 0.00
 14 20 9 0.36 0.00
 14 20 10 -0.13 0.00
 14 20 11 3.32 0.00
 14 20 12 -0.42 0.00
 14 20 13 -1.66 0.00
 14 20 14 2.37 0.00
 14 20 15 -3.56 0.00
 14 22 0 -3.13 0.00
 14 22 1 5.03 0.00
 14 22 2 12.29 0.00
 14 22 3 -2.33 0.00
 14 22 4 -0.81 0.00
 14 22 5 -3.40 0.00
 14 22 6 -2.62 0.00
 14 22 7 -4.24 0.00
 14 22 8 -2.63 0.00
 14 22 9 1.18 0.00
 14 22 10 0.64 0.00
 14 22 11 -1.90 0.00
 14 22 12 0.71 0.00
 14 22 13 -3.92 0.00
 14 22 14 5.13 0.00
 14 22 15 1.51 0.00
 14 24 0 2.69 0.00
 14 24 1 14.98 0.00
 14 24 2 7.06 0.00
 14 24 3 7.47 0.00
 14 24 4 0.54 0.00
 14 24 5 2.59 0.00
 14 24 6 -4.61 0.00
 14 24 7 1.98 0.00
 14 24 8 -10.32 0.00
 14 24 9 -2.21 0.00
 14 24 10 1.72 0.00
 14 24 11 1.34 0.00
 14 24 12 -5.56 0.00
 14 24 13 4.95 0.00
 14 24 14 -1.47 0.00
 14 26 0 -4.63 0.00
 14 26 1 6.72 0.00
 14 26 2 0.78 0.00
 14 26 3 5.55 0.00
 14 26 4 -0.53 0.00
 14 26 5 0.72 0.00
 14 26 6 0.97 0.00
 14 26 7 0.26 0.00
 14 26 8 -3.88 0.00
 14 26 9 -0.86 0.00
 14 26 10 -0.89 0.00
 14 26 11 -2.43 0.00
 14 26 12 -2.77 0.00
 14 26 13 -3.22 0.00
 14 28 0 -5.89 0.00
 14 28 1 -6.29 0.00
 14 28 2 -1.58 0.00
 14 28 3 2.89 0.00
 14 28 4 0.17 0.00
 14 28 5 4.94 0.00
 14 28 6 -3.31 0.00
 14 28 7 -2.52 0.00
 14 28 8 10.05 0.00
 14 28 9 -2.10 0.00
 14 28 10 1.06 0.00
 14 28 11 3.46 0.00
 14 28 12 1.36 0.00
 14 28 13 -0.92 0.00
 14 30 0 -7.16 0.00
 14 30 1 -4.00 0.00
 14 30 2 -1.89 0.00
 14 30 3 -0.11 0.00
 14 30 4 2.14 0.00
 14 30 5 5.36 0.00
 14 30 6 3.62 0.00
 14 30 7 1.24 0.00
 14 30 8 1.44 0.00
 14 30 9 1.69 0.00
 14 30 10 -2.71 0.00
 14 30 11 2.93 0.00
 14 30 12 1.67 0.00
 14 32 0 0.42 0.00
 14 32 1 -8.43 0.00
 14 32 2 0.02 0.00
 14 32 3 0.51 0.00
 14 32 4 0.28 0.00
 14 32 5 -7.17 0.00
 14 32 6 1.86 0.00
 14 32 7 -0.43 0.00
 14 32 8 1.41 0.00
 14 32 9 -4.66 0.00
 14 32 10 -2.82 0.00
 14 34 0 -0.99 0.00
 14 34 1 -2.92 0.00
 14 34 2 4.17 0.00
 14 34 3 -0.31 0.00
 14 34 4 -3.89 0.00
 14 34 5 0.55 0.00
 14 34 6 0.05 0.00
 14 34 7 -2.09 0.00
 14 34 8 -0.23 0.00
 14 34 9 -2.83 0.00
 14 36 0 0.65 0.00
 14 36 1 0.03 0.00
 14 36 2 -4.38 0.00
 14 36 3 -1.68 0.00
 14 36 4 2.93 0.00
 14 36 5 0.72 0.00
 14 36 6 1.26 0.00
 14 36 7 2.87 0.00
 14 36 8 3.86 0.00
 14 36 9 10.94 0.00
 14 38 0 1.64 0.00
 14 38 1 -2.87 0.00
 14 38 2 -0.35 0.00
 14 38 3 -5.40 0.00
 14 38 4 -0.94 0.00
 14 38 5 2.97 0.00
 14 38 6 1.41 0.00
 14 38 7 2.49 0.00
 14 38 8 6.20 0.00
 14 40 0 -3.90 0.00
 14 40 1 3.40 0.00
 14 40 2 -2.53 0.00
 14 40 3 -2.18 0.00
 14 40 4 -1.72 0.00
 14 40 5 -2.49 0.00
 14 40 6 -2.93 0.00
 14 42 0 4.97 0.00
 14 42 1 2.05 0.00
 14 42 2 1.58 0.00
 14 42 3 0.51 0.00
 14 42 4 4.50 0.00
 14 42 5 2.76 0.00
 15 1 0 -0.78 0.00
 15 1 1 -16.13 0.00
 15 1 2 -3.64 0.00
 15 1 3 5.31 0.00
 15 1 4 -10.83 0.00
 15 1 5 5.33 0.00
 15 1 6 -10.75 0.00
 15 1 7 5.48 0.00
 15 1 8 0.94 0.00
 15 1 9 -1.19 0.00
 15 1 10 -3.88 0.00
 15 1 11 -1.72 0.00
 15 1 12 -0.09 0.00
 15 1 13 3.68 0.00
 15 1 14 1.53 0.00
 15 1 15 4.62 0.00
 15 1 16 2.46 0.00
 15 3 0 3.91 0.00
 15 3 1 3.68 0.00
 15 3 2 4.79 0.00
 15 3 3 2.79 0.00
 15 3 4 10.29 0.00
 15 3 5 9.87 0.00
 15 3 6 3.00 0.00
 15 3 7 -4.97 0.00
 15 3 8 4.11 0.00
 15 3 9 -3.08 0.00
 15 3 10 0.96 0.00
 15 3 11 -4.09 0.00
 15 3 12 3.76 0.00
 15 3 13 -1.42 0.00
 15 3 14 0.01 0.00
 15 3 15 1.45 0.00
 15 3 16 -0.83 0.00
 15 5 0 -16.07 0.00
 15 5 1 -10.02 0.00
 15 5 2 9.46 0.00
 15 5 3 -2.38 0.00
 15 5 4 5.71 0.00
 15 5 5 -4.95 0.00
 15 5 6 1.68 0.00
 15 5 7 -1.56 0.00
 15 5 8 -4.46 0.00
 15 5 9 1.68 0.00
 15 5 10 -2.27 0.00
 15 5 11 3.76 0.00
 15 5 12 6.97 0.00
 15 5 13 0.53 0.00
 15 5 14 1.88 0.00
 15 5 15 0.76 0.00
 15 5 16 -1.69 0.00
 15 7 0 -17.40 0.00
 15 7 1 5.02 0.00
 15 7 2 7.26 0.00
 15 7 3 12.94 0.00
 15 7 4 2.11 0.00
 15 7 5 6.42 0.00
 15 7 6 -1.39 0.00
 15 7 7 5.17 0.00
 15 7 8 -6.13 0.00
 15 7 9 -0.39 0.00
 15 7 10 3.86 0.00
 15 7 11 -2.16 0.00
 15 7 12 -0.65 0.00
 15 7 13 1.20 0.00
 15 7 14 -0.50 0.00
 15 7 15 1.99 0.00
 15 7 16 -1.94 0.00
 15 9 0 -14.22 0.00
 15 9 1 0.03 0.00
 15 9 2 7.94 0.00
 15 9 3 0.14 0.00
 15 9 4 1.87 0.00
 15 9 5 3.98 0.00
 15 9 6 5.21 0.00
 15 9 7 -2.23 0.00
 15 9 8 -5.68 0.00
 15 9 9 -6.72 0.00
 15 9 10 1.99 0.00
 15 9 11 -1.56 0.00
 15 9 12 -0.98 0.00
 15 9 13 1.49 0.00
 15 9 14 -2.54 0.00
 15 9 15 -9.00 0.00
 15 9 16 -2.37 0.00
 15 11 0 -4.26 0.00
 15 11 1 -8.33 0.00
 15 11 2 -0.42 0.00
 15 11 3 6.78 0.00
 15 11 4 4.25 0.00
 15 11 5 1.11 0.00
 15 11 6 -8.31 0.00
 15 11 7 7.81 0.00
 15 11 8 -4.62 0.00
 15 11 9 -0.71 0.00
 15 11 10 -2.94 0.00
 15 11 11 -7.92 0.00
 15 11 12 0.26 0.00
 15 11 13 1.95 0.00
 15 11 14 -0.06 0.00
 15 11 15 -4.96 0.00
 15 11 16 3.48 0.00
 15 13 0 -10.76 0.00
 15 13 1 -7.79 0.00
 15 13 2 5.97 0.00
 15 13 3 -10.87 0.00
 15 13 4 7.96 0.00
 15 13 5 -3.29 0.00
 15 13 6 -0.88 0.00
 15 13 7 4.13 0.00
 15 13 8 -0.41 0.00
 15 13 9 -1.70 0.00
 15 13 10 -2.52 0.00
 15 13 11 1.49 0.00
 15 13 12 -3.71 0.00
 15 13 13 3.50 0.00
 15 13 14 -0.18 0.00
 15 13 15 -0.23 0.00
 15 13 16 -4.00 0.00
 15 15 0 3.08 0.00
 15 15 1 -2.89 0.00
 15 15 2 -8.40 0.00
 15 15 3 0.22 0.00
 15 15 4 10.63 0.00
 15 15 5 -6.23 0.00
 15 15 6 3.97 0.00
 15 15 7 2.17 0.00
 15 15 8 3.46 0.00
 15 15 9 -1.68 0.00
 15 15 10 -0.38 0.00
 15 15 11 0.99 0.00
 15 15 12 4.67 0.00
 15 15 13 -4.08 0.00
 15 15 14 -1.00 0.00
 15 15 15 -1.09 0.00
 15 15 16 -2.06 0.00
 15 17 0 -7.01 0.00
 15 17 1 2.50 0.00
 15 17 2 12.65 0.00
 15 17 3 -0.48 0.00
 15 17 4 4.07 0.00
 15 17 5 1.87 0.00
 15 17 6 7.85 0.00
 15 17 7 -0.83 0.00
 15 17 8 0.99 0.00
 15 17 9 1.14 0.00
 15 17 10 -0.10 0.00
 15 17 11 6.24 0.00
 15 17 12 -1.17 0.00
 15 17 13 5.06 0.00
 15 17 14 2.55 0.00
 15 17 15 1.77 0.00
 15 19 0 1.25 0.00
 15 19 1 3.70 0.00
 15 19 2 2.82 0.00
 15 19 3 -0.63 0.00
 15 19 4 17.82 0.00
 15 19 5 1.42 0.00
 15 19 6 7.58 0.00
 15 19 7 -9.16 0.00
 15 19 8 -1.61 0.00
 15 19 9 2.79 0.00
 15 19 10 -2.62 0.00
 15 19 11 4.01 0.00
 15 19 12 -1.26 0.00
 15 19 13 0.98 0.00
 15 19 14 -0.92 0.00
 15 19 15 0.74 0.00
 15 21 0 -5.42 0.00
 15 21 1 1.73 0.00
 15 21 2 -8.90 0.00
 15 21 3 0.10 0.00
 15 21 4 -4.96 0.00
 15 21 5 2.29 0.00
 15 21 6 -0.57 0.00
 15 21 7 5.78 0.00
 15 21 8 1.27 0.00
 15 21 9 -0.70 0.00
 15 21 10 -0.36 0.00
 15 21 11 3.48 0.00
 15 21 12 5.14 0.00
 15 21 13 4.51 0.00
 15 21 14 2.17 0.00
 15 21 15 -2.17 0.00
 15 23 0 -10.72 0.00
 15 23 1 2.45 0.00
 15 23 2 5.62 0.00
 15 23 3 -3.81 0.00
 15 23 4 -1.70 0.00
 15 23 5 -8.88 0.00
 15 23 6 -4.97 0.00
 15 23 7 -3.67 0.00
 15 23 8 -6.43 0.00
 15 23 9 1.06 0.00
 15 23 10 0.45 0.00
 15 23 11 6.76 0.00
 15 23 12 -5.59 0.00
 15 23 13 -0.20 0.00
 15 23 14 3.53 0.00
 15 25 0 13.41 0.00
 15 25 1 -4.83 0.00
 15 25 2 8.07 0.00
 15 25 3 -8.83 0.00
 15 25 4 -0.94 0.00
 15 25 5 -4.94 0.00
 15 25 6 -2.96 0.00
 15 25 7 -1.65 0.00
 15 25 8 -3.05 0.00
 15 25 9 -4.13 0.00
 15 25 10 -0.67 0.00
 15 25 11 -4.59 0.00
 15 25 12 -0.98 0.00
 15 25 13 -2.80 0.00
 15 27 0 -10.33 0.00
 15 27 1 -1.66 0.00
 15 27 2 -6.00 0.00
 15 27 3 -3.82 0.00
 15 27 4 -8.24 0.00
 15 27 5 -2.35 0.00
 15 27 6 -5.41 0.00
 15 27 7 -2.83 0.00
 15 27 8 -6.09 0.00
 15 27 9 -0.45 0.00
 15 27 10 -6.29 0.00
 15 27 11 -4.66 0.00
 15 27 12 -1.90 0.00
 15 29 0 -7.26 0.00
 15 29 1 -0.43 0.00
 15 29 2 -4.19 0.00
 15 29 3 3.59 0.00
 15 29 4 -1.68 0.00
 15 29 5 -0.01 0.00
 15 29 6 -0.27 0.00
 15 29 7 4.77 0.00
 15 29 8 -3.02 0.00
 15 29 9 4.55 0.00
 15 29 10 0.87 0.00
 15 29 11 5.44 0.00
 15 31 0 2.68 0.00
 15 31 1 -6.71 0.00
 15 31 2 7.08 0.00
 15 31 3 5.84 0.00
 15 31 4 6.36 0.00
 15 31 5 1.39 0.00
 15 31 6 2.81 0.00
 15 31 7 1.92 0.00
 15 31 8 5.31 0.00
 15 31 9 -1.06 0.00
 15 31 10 -0.40 0.00
 15 33 0 -4.37 0.00
 15 33 1 -0.66 0.00
 15 33 2 -1.46 0.00
 15 33 3 0.82 0.00
 15 33 4 0.57 0.00
 15 33 5 2.66 0.00
 15 33 6 4.42 0.00
 15 33 7 2.13 0.00
 15 33 8 -0.48 0.00
 15 33 9 -6.59 0.00
 15 35 0 -4.90 0.00
 15 35 1 -8.70 0.00
 15 35 2 1.40 0.00
 15 35 3 -0.04 0.00
 15 35 4 -0.88 0.00
 15 35 5 -3.64 0.00
 15 35 6 4.58 0.00
 15 35 7 -2.53 0.00
 15 35 8 3.15 0.00
 15 35 9 -7.23 0.00
 15 37 0 -3.67 0.00
 15 37 1 11.55 0.00
 15 37 2 -1.06 0.00
 15 37 3 2.01 0.00
 15 37 4 -1.30 0.00
 15 37 5 1.52 0.00
 15 37 6 0.93 0.00
 15 37 7 10.22 0.00
 15 37 8 0.93 0.00
 15 39 0 1.03 0.00
 15 39 1 3.33 0.00
 15 39 2 -0.79 0.00
 15 39 3 -0.31 0.00
 15 39 4 -0.04 0.00
 15 39 5 -1.79 0.00
 15 39 6 -5.82 0.00
 15 41 0 0.25 0.00
 15 41 1 2.10 0.00
 15 41 2 1.42 0.00
 15 41 3 -4.96 0.00
 15 41 4 0.91 0.00
 15 41 5 -2.35 0.00
 16 0 0 -0.26 0.00
 16 0 1 -24.20 0.00
 16 0 2 -18.43 0.00
 16 0 3 -30.26 0.00
 16 0 4 7.68 0.00
 16 0 5 3.99 0.00
 16 0 6 9.86 0.00
 16 0 7 -18.07 0.00
 16 0 8 -5.16 0.00
 16 0 9 -9.69 0.00
 16 0 10 0.72 0.00
 16 0 11 -0.17 0.00
 16 0 12 -3.72 0.00
 16 0 13 -2.36 0.00
 16 0 14 -4.55 0.00
 16 0 15 4.72 0.00
 16 0 16 -0.62 0.00
 16 2 0 -13.23 0.00
 16 2 1 -1.40 0.00
 16 2 2 11.01 0.00
 16 2 3 8.35 0.00
 16 2 4 8.31 0.00
 16 2 5 5.17 0.00
 16 2 6 1.62 0.00
 16 2 7 -0.56 0.00
 16 2 8 -0.77 0.00
 16 2 9 -6.82 0.00
 16 2 10 -2.60 0.00
 16 2 11 3.66 0.00
 16 2 12 -0.12 0.00
 16 2 13 -2.50 0.00
 16 2 14 0.30 0.00
 16 2 15 3.14 0.00
 16 2 16 -1.10 0.00
 16 4 0 6.90 0.00
 16 4 1 -0.90 0.00
 16 4 2 1.24 0.00
 16 4 3 -1.03 0.00
 16 4 4 -3.27 0.00
 16 4 5 9.34 0.00
 16 4 6 4.38 0.00
 16 4 7 -1.88 0.00
 16 4 8 -0.92 0.00
 16 4 9 0.31 0.00
 16 4 10 4.63 0.00
 16 4 11 4.12 0.00
 16 4 12 2.53 0.00
 16 4 13 1.40 0.00
 16 4 14 1.84 0.00
 16 4 15 3.52 0.00
 16 4 16 -2.95 0.00
 16 6 0 10.22 0.00
 16 6 1 0.80 0.00
 16 6 2 11.89 0.00
 16 6 3 8.14 0.00
 16 6 4 -6.53 0.00
 16 6 5 -4.68 0.00
 16 6 6 -2.43 0.00
 16 6 7 -3.13 0.00
 16 6 8 -11.31 0.00
 16 6 9 4.38 0.00
 16 6 10 5.34 0.00
 16 6 11 1.45 0.00
 16 6 12 -2.05 0.00
 16 6 13 1.49 0.00
 16 6 14 -2.32 0.00
 16 6 15 0.01 0.00
 16 6 16 1.04 0.00
 16 8 0 -2.45 0.00
 16 8 1 5.18 0.00
 16 8 2 3.89 0.00
 16 8 3 0.19 0.00
 16 8 4 3.71 0.00
 16 8 5 -7.35 0.00
 16 8 6 0.58 0.00
 16 8 7 -1.27 0.00
 16 8 8 -4.98 0.00
 16 8 9 0.94 0.00
 16 8 10 0.72 0.00
 16 8 11 -3.50 0.00
 16 8 12 -6.71 0.00
 16 8 13 -4.44 0.00
 16 8 14 -0.25 0.00
 16 8 15 -5.43 0.00
 16 8 16 0.21 0.00
 16 10 0 6.89 0.00
 16 10 1 -4.88 0.00
 16 10 2 -0.96 0.00
 16 10 3 -4.37 0.00
 16 10 4 0.37 0.00
 16 10 5 -15.66 0.00
 16 10 6 3.52 0.00
 16 10 7 -10.67 0.00
 16 10 8 2.84 0.00
 16 10 9 -5.74 0.00
 16 10 10 4.80 0.00
 16 10 11 -1.84 0.00
 16 10 12 1.76 0.00
 16 10 13 -0.64 0.00
 16 10 14 0.84 0.00
 16 10 15 0.44 0.00
 16 10 16 -0.09 0.00
 16 12 0 -9.43 0.00
 16 12 1 1.19 0.00
 16 12 2 -4.82 0.00
 16 12 3 -5.66 0.00
 16 12 4 -1.82 0.00
 16 12 5 -7.86 0.00
 16 12 6 -10.80 0.00
 16 12 7 4.44 0.00
 16 12 8 -1.67 0.00
 16 12 9 0.58 0.00
 16 12 10 4.91 0.00
 16 12 11 3.36 0.00
 16 12 12 -6.72 0.00
 16 12 13 5.29 0.00
 16 12 14 0.95 0.00
 16 12 15 1.64 0.00
 16 12 16 0.94 0.00
 16 14 0 9.27 0.00
 16 14 1 8.64 0.00
 16 14 2 1.97 0.00
 16 14 3 7.98 0.00
 16 14 4 -2.86 0.00
 16 14 5 9.62 0.00
 16 14 6 -0.44 0.00
 16 14 7 -2.46 0.00
 16 14 8 -2.11 0.00
 16 14 9 2.97 0.00
 16 14 10 -4.33 0.00
 16 14 11 5.83 0.00
 16 14 12 -1.55 0.00
 16 14 13 5.82 0.00
 16 14 14 -1.18 0.00
 16 14 15 -3.38 0.00
 16 16 0 9.87 0.00
 16 16 1 0.09 0.00
 16 16 2 -0.87 0.00
 16 16 3 -0.04 0.00
 16 16 4 7.12 0.00
 16 16 5 1.45 0.00
 16 16 6 4.83 0.00
 16 16 7 4.53 0.00
 16 16 8 3.18 0.00
 16 16 9 0.50 0.00
 16 16 10 -0.02 0.00
 16 16 11 3.61 0.00
 16 16 12 -2.04 0.00
 16 16 13 -3.65 0.00
 16 16 14 2.97 0.00
 16 16 15 -7.60 0.00
 16 18 0 11.76 0.00
 16 18 1 -4.20 0.00
 16 18 2 3.87 0.00
 16 18 3 1.40 0.00
 16 18 4 -0.86 0.00
 16 18 5 3.52 0.00
 16 18 6 -0.38 0.00
 16 18 7 3.53 0.00
 16 18 8 1.60 0.00
 16 18 9 0.96 0.00
 16 18 10 0.09 0.00
 16 18 11 0.40 0.00
 16 18 12 1.26 0.00
 16 18 13 -4.55 0.00
 16 18 14 1.39 0.00
 16 18 15 -4.75 0.00
 16 20 0 -7.80 0.00
 16 20 1 -3.21 0.00
 16 20 2 -1.08 0.00
 16 20 3 -4.28 0.00
 16 20 4 2.11 0.00
 16 20 5 -3.49 0.00
 16 20 6 7.15 0.00
 16 20 7 -0.45 0.00
 16 20 8 -1.71 0.00
 16 20 9 -1.83 0.00
 16 20 10 1.08 0.00
 16 20 11 0.70 0.00
 16 20 12 -3.75 0.00
 16 20 13 -3.79 0.00
 16 20 14 -5.49 0.00
 16 22 0 -6.09 0.00
 16 22 1 3.57 0.00
 16 22 2 -4.03 0.00
 16 22 3 6.70 0.00
 16 22 4 0.59 0.00
 16 22 5 1.89 0.00
 16 22 6 1.26 0.00
 16 22 7 -1.28 0.00
 16 22 8 3.03 0.00
 16 22 9 3.64 0.00
 16 22 10 1.63 0.00
 16 22 11 0.61 0.00
 16 22 12 -1.11 0.00
 16 22 13 1.63 0.00
 16 22 14 -6.30 0.00
 16 24 0 3.44 0.00
 16 24 1 -4.06 0.00
 16 24 2 3.25 0.00
 16 24 3 0.91 0.00
 16 24 4 0.40 0.00
 16 24 5 -0.24 0.00
 16 24 6 4.06 0.00
 16 24 7 1.57 0.00
 16 24 8 -1.61 0.00
 16 24 9 -0.32 0.00
 16 24 10 6.27 0.00
 16 24 11 1.45 0.00
 16 24 12 1.66 0.00
 16 24 13 1.97 0.00
 16 26 0 3.71 0.00
 16 26 1 -13.19 0.00
 16 26 2 -3.70 0.00
 16 26 3 0.94 0.00
 16 26 4 0.11 0.00
 16 26 5 -10.35 0.00
 16 26 6 -2.05 0.00
 16 26 7 -1.29 0.00
 16 26 8 -0.68 0.00
 16 26 9 0.60 0.00
 16 26 10 2.84 0.00
 16 26 11 -7.41 0.00
 16 26 12 -2.39 0.00
 16 28 0 -0.07 0.00
 16 28 1 -2.98 0.00
 16 28 2 -5.86 0.00
 16 28 3 -6.30 0.00
 16 28 4 -3.78 0.00
 16 28 5 -5.62 0.00
 16 28 6 -7.30 0.00
 16 28 7 -2.97 0.00
 16 28 8 1.39 0.00
 16 28 9 -4.74 0.00
 16 28 10 -4.29 0.00
 16 28 11 -1.70 0.00
 16 30 0 0.22 0.00
 16 30 1 9.40 0.00
 16 30 2 -1.91 0.00
 16 30 3 3.70 0.00
 16 30 4 0.82 0.00
 16 30 5 5.62 0.00
 16 30 6 -4.11 0.00
 16 30 7 6.59 0.00
 16 30 8 0.57 0.00
 16 30 9 3.02 0.00
 16 30 10 1.05 0.00
 16 32 0 2.33 0.00
 16 32 1 5.07 0.00
 16 32 2 -1.45 0.00
 16 32 3 2.02 0.00
 16 32 4 -2.79 0.00
 16 32 5 -1.63 0.00
 16 32 6 -0.08 0.00
 16 32 7 5.96 0.00
 16 32 8 2.49 0.00
 16 32 9 -0.30 0.00
 16 34 0 -3.34 0.00
 16 34 1 0.05 0.00
 16 34 2 2.67 0.00
 16 34 3 -0.26 0.00
 16 34 4 -5.38 0.00
 16 34 5 1.47 0.00
 16 34 6 0.15 0.00
 16 34 7 -2.84 0.00
 16 34 8 -0.18 0.00
 16 34 9 2.42 0.00
 16 36 0 -3.54 0.00
 16 36 1 -0.62 0.00
 16 36 2 -6.84 0.00
 16 36 3 -2.50 0.00
 16 36 4 4.14 0.00
 16 36 5 -1.39 0.00
 16 36 6 -6.39 0.00
 16 36 7 -3.33 0.00
 16 36 8 -10.31 0.00
 16 38 0 8.29 0.00
 16 38 1 -0.01 0.00
 16 38 2 7.86 0.00
 16 38 3 0.78 0.00
 16 38 4 4.02 0.00
 16 38 5 -0.95 0.00
 16 38 6 0.54 0.00
 16 40 0 -6.14 0.00
 16 40 1 4.48 0.00
 16 40 2 5.10 0.00
 16 40 3 0.13 0.00
 16 40 4 0.41 0.00
 16 40 5 -5.51 0.00
 17 1 0 3.58 0.00
 17 1 1 -3.71 0.00
 17 1 2 -2.60 0.00
 17 1 3 -2.65 0.00
 17 1 4 -2.31 0.00
 17 1 5 -7.37 0.00
 17 1 6 0.97 0.00
 17 1 7 5.29 0.00
 17 1 8 5.81 0.00
 17 1 9 2.53 0.00
 17 1 10 1.84 0.00
 17 1 12 2.32 0.00
 17 1 13 -3.09 0.00
 17 1 14 -2.88 0.00
 17 1 15 -0.54 0.00
 17 1 16 -5.77 0.00
 17 3 0 10.01 0.00
 17 3 1 10.50 0.00
 17 3 2 -10.61 0.00
 17 3 3 3.77 0.00
 17 3 4 -7.30 0.00
 17 3 5 -0.89 0.00
 17 3 6 0.84 0.00
 17 3 7 -6.88 0.00
 17 3 8 0.45 0.00
 17 3 9 1.84 0.00
 17 3 10 -1.80 0.00
 17 3 11 -1.95 0.00
 17 3 12 -4.02 0.00
 17 3 13 0.93 0.00
 17 3 14 -2.41 0.00
 17 3 15 -1.85 0.00
 17 3 16 -5.36 0.00
 17 5 0 0.75 0.00
 17 5 1 -12.56 0.00
 17 5 2 -4.85 0.00
 17 5 3 0.24 0.00
 17 5 4 -3.98 0.00
 17 5 5 -1.33 0.00
 17 5 6 12.20 0.00
 17 5 7 2.26 0.00
 17 5 8 7.71 0.00
 17 5 9 2.55 0.00
 17 5 10 0.94 0.00
 17 5 11 1.00 0.00
 17 5 12 -1.04 0.00
 17 5 13 0.35 0.00
 17 5 14 3.42 0.00
 17 5 15 -0.78 0.00
 17 5 16 -0.71 0.00
 17 7 0 13.29 0.00
 17 7 1 9.09 0.00
 17 7 2 -7.74 0.00
 17 7 3 7.40 0.00
 17 7 4 -4.86 0.00
 17 7 5 1.56 0.00
 17 7 6 1.79 0.00
 17 7 7 10.96 0.00
 17 7 8 -0.87 0.00
 17 7 9 -1.78 0.00
 17 7 10 0.96 0.00
 17 7 11 -3.33 0.00
 17 7 12 -3.58 0.00
 17 7 13 0.30 0.00
 17 7 14 4.70 0.00
 17 7 15 4.33 0.00
 17 7 16 0.41 0.00
 17 9 0 2.08 0.00
 17 9 1 -3.91 0.00
 17 9 2 0.80 0.00
 17 9 3 -8.59 0.00
 17 9 4 3.62 0.00
 17 9 5 1.08 0.00
 17 9 6 2.73 0.00
 17 9 7 -4.86 0.00
 17 9 8 3.09 0.00
 17 9 9 -2.82 0.00
 17 9 10 4.86 0.00
 17 9 11 1.30 0.00
 17 9 12 2.81 0.00
 17 9 13 1.35 0.00
 17 9 14 1.15 0.00
 17 9 15 -1.41 0.00
 17 9 16 1.59 0.00
 17 11 0 11.52 0.00
 17 11 1 7.88 0.00
 17 11 2 -9.13 0.00
 17 11 3 1.65 0.00
 17 11 4 2.98 0.00
 17 11 5 2.82 0.00
 17 11 6 -7.47 0.00
 17 11 7 2.97 0.00
 17 11 8 2.09 0.00
 17 11 9 -2.25 0.00
 17 11 10 -0.12 0.00
 17 11 11 -1.68 0.00
 17 11 12 1.69 0.00
 17 11 13 2.02 0.00
 17 11 14 -1.54 0.00
 17 11 15 -0.48 0.00
 17 13 0 -5.33 0.00
 17 13 1 12.28 0.00
 17 13 2 -0.34 0.00
 17 13 3 -1.33 0.00
 17 13 4 0.24 0.00
 17 13 5 1.77 0.00
 17 13 6 -5.58 0.00
 17 13 7 -8.51 0.00
 17 13 8 2.37 0.00
 17 13 9 -2.72 0.00
 17 13 10 1.22 0.00
 17 13 11 2.67 0.00
 17 13 12 -5.16 0.00
 17 13 13 2.09 0.00
 17 13 14 -2.14 0.00
 17 13 15 -0.83 0.00
 17 15 0 7.66 0.00
 17 15 1 -9.01 0.00
 17 15 2 -14.10 0.00
 17 15 3 -2.66 0.00
 17 15 4 -6.49 0.00
 17 15 5 -9.11 0.00
 17 15 6 -8.62 0.00
 17 15 7 -0.62 0.00
 17 15 8 -0.16 0.00
 17 15 9 -0.48 0.00
 17 15 10 0.65 0.00
 17 15 11 2.37 0.00
 17 15 12 -0.50 0.00
 17 15 13 -6.64 0.00
 17 15 14 -0.87 0.00
 17 15 15 -8.41 0.00
 17 17 0 -1.89 0.00
 17 17 1 -4.13 0.00
 17 17 2 8.63 0.00
 17 17 3 0.88 0.00
 17 17 4 -4.00 0.00
 17 17 5 2.65 0.00
 17 17 6 -1.49 0.00
 17 17 7 -3.67 0.00
 17 17 8 5.16 0.00
 17 17 9 1.17 0.00
 17 17 10 4.33 0.00
 17 17 11 1.98 0.00
 17 17 12 -1.37 0.00
 17 17 13 -1.21 0.00
 17 17 14 3.74 0.00
 17 17 15 -5.85 0.00
 17 19 0 6.54 0.00
 17 19 1 1.36 0.00
 17 19 2 1.75 0.00
 17 19 3 -0.27 0.00
 17 19 4 2.82 0.00
 17 19 5 5.76 0.00
 17 19 6 -1.81 0.00
 17 19 7 0.05 0.00
 17 19 8 -0.39 0.00
 17 19 9 -1.20 0.00
 17 19 10 2.13 0.00
 17 19 11 -3.90 0.00
 17 19 12 -2.08 0.00
 17 19 13 -3.06 0.00
 17 19 14 -1.32 0.00
 17 21 0 -2.91 0.00
 17 21 1 3.29 0.00
 17 21 2 -6.04 0.00
 17 21 3 9.57 0.00
 17 21 4 -4.36 0.00
 17 21 5 7.79 0.00
 17 21 6 -0.89 0.00
 17 21 7 11.69 0.00
 17 21 8 -0.64 0.00
 17 21 9 -1.81 0.00
 17 21 10 0.76 0.00
 17 21 11 -5.38 0.00
 17 21 12 4.33 0.00
 17 21 13 0.23 0.00
 17 21 14 -1.97 0.00
 17 23 0 1.23 0.00
 17 23 1 0.94 0.00
 17 23 2 8.71 0.00
 17 23 3 0.37 0.00
 17 23 4 -1.86 0.00
 17 23 5 -3.34 0.00
 17 23 6 -0.33 0.00
 17 23 7 4.48 0.00
 17 23 8 -5.29 0.00
 17 23 9 -2.27 0.00
 17 23 10 5.38 0.00
 17 23 11 0.93 0.00
 17 23 12 -3.33 0.00
 17 23 13 -3.09 0.00
 17 25 0 2.11 0.00
 17 25 1 -1.68 0.00
 17 25 2 -8.28 0.00
 17 25 3 3.31 0.00
 17 25 4 -5.35 0.00
 17 25 5 -0.19 0.00
 17 25 6 -2.44 0.00
 17 25 7 0.59 0.00
 17 25 8 -0.35 0.00
 17 25 9 -1.91 0.00
 17 25 10 4.20 0.00
 17 25 11 2.00 0.00
 17 25 12 3.10 0.00
 17 27 0 3.76 0.00
 17 27 1 -1.35 0.00
 17 27 2 -10.23 0.00
 17 27 3 -7.00 0.00
 17 27 4 -5.30 0.00
 17 27 5 -4.40 0.00
 17 27 6 -0.15 0.00
 17 27 7 -5.16 0.00
 17 27 8 2.97 0.00
 17 27 9 -0.80 0.00
 17 27 10 -1.81 0.00
 17 27 11 -1.25 0.00
 17 29 0 3.50 0.00
 17 29 1 4.45 0.00
 17 29 2 -0.11 0.00
 17 29 3 -0.20 0.00
 17 29 4 3.34 0.00
 17 29 5 -3.16 0.00
 17 29 6 0.32 0.00
 17 29 7 2.58 0.00
 17 29 8 1.58 0.00
 17 29 9 3.85 0.00
 17 29 10 8.78 0.00
 17 31 0 8.27 0.00
 17 31 1 6.78 0.00
 17 31 2 3.60 0.00
 17 31 3 4.21 0.00
 17 31 4 2.25 0.00
 17 31 5 -0.19 0.00
 17 31 6 -6.07 0.00
 17 31 7 -1.73 0.00
 17 31 8 4.67 0.00
 17 31 9 0.73 0.00
 17 33 0 1.06 0.00
 17 33 1 9.57 0.00
 17 33 2 0.36 0.00
 17 33 3 -1.96 0.00
 17 33 4 -2.20 0.00
 17 33 5 2.98 0.00
 17 33 6 -2.69 0.00
 17 33 7 2.85 0.00
 17 33 8 -1.06 0.00
 17 33 9 -5.84 0.00
 17 35 0 4.36 0.00
 17 35 1 -8.88 0.00
 17 35 2 5.42 0.00
 17 35 3 -5.64 0.00
 17 35 4 -1.14 0.00
 17 35 5 -6.81 0.00
 17 35 6 -0.88 0.00
 17 35 7 -0.84 0.00
 17 35 8 2.08 0.00
 17 37 0 3.51 0.00
 17 37 1 5.43 0.00
 17 37 2 2.25 0.00
 17 37 3 4.54 0.00
 17 37 4 -1.42 0.00
 17 37 5 10.68 0.00
 17 37 6 -1.94 0.00
 17 39 0 0.05 0.00
 17 39 1 -5.95 0.00
 17 39 2 -2.92 0.00
 17 39 3 -2.60 0.00
 17 39 4 2.98 0.00
 17 39 5 2.53 0.00
 18 0 0 18.56 0.00
 18 0 1 -2.84 0.00
 18 0 2 -11.60 0.00
 18 0 3 4.08 0.00
 18 0 4 2.89 0.00
 18 0 5 13.53 0.00
 18 0 6 -2.10 0.00
 18 0 7 -10.61 0.00
 18 0 8 -2.25 0.00
 18 0 9 -7.28 0.00
 18 0 10 7.87 0.00
 18 0 12 1.56 0.00
 18 0 13 -5.68 0.00
 18 0 14 -5.88 0.00
 18 0 15 -7.32 0.00
 18 2 0 3.69 0.00
 18 2 1 10.38 0.00
 18 2 2 6.34 0.00
 18 2 3 19.00 0.00
 18 2 4 -8.52 0.00
 18 2 5 0.86 0.00
 18 2 6 -5.09 0.00
 18 2 7 0.69 0.00
 18 2 8 1.66 0.00
 18 2 9 -2.38 0.00
 18 2 10 1.55 0.00
 18 2 11 -0.40 0.00
 18 2 12 2.34 0.00
 18 2 13 -1.10 0.00
 18 2 14 -3.33 0.00
 18 2 15 0.45 0.00
 18 4 0 -1.07 0.00
 18 4 1 -2.98 0.00
 18 4 2 -8.34 0.00
 18 4 3 -7.54 0.00
 18 4 4 0.41 0.00
 18 4 5 1.88 0.00
 18 4 6 6.97 0.00
 18 4 7 0.09 0.00
 18 4 8 0.91 0.00
 18 4 9 1.55 0.00
 18 4 10 -0.74 0.00
 18 4 11 2.10 0.00
 18 4 12 0.67 0.00
 18 4 13 0.02 0.00
 18 4 14 1.51 0.00
 18 4 15 0.95 0.00
 18 6 0 5.90 0.00
 18 6 1 -4.40 0.00
 18 6 2 8.57 0.00
 18 6 3 -6.26 0.00
 18 6 4 -0.69 0.00
 18 6 5 -8.26 0.00
 18 6 6 -2.27 0.00
 18 6 7 -5.33 0.00
 18 6 8 -4.00 0.00
 18 6 9 0.40 0.00
 18 6 10 1.85 0.00
 18 6 11 -2.15 0.00
 18 6 12 0.54 0.00
 18 6 13 -1.01 0.00
 18 6 14 0.04 0.00
 18 6 15 4.21 0.00
 18 8 0 -6.33 0.00
 18 8 1 2.56 0.00
 18 8 2 0.35 0.00
 18 8 3 -3.31 0.00
 18 8 4 -0.58 0.00
 18 8 5 8.86 0.00
 18 8 6 2.34 0.00
 18 8 7 11.78 0.00
 18 8 8 4.81 0.00
 18 8 9 -0.98 0.00
 18 8 10 4.83 0.00
 18 8 11 0.02 0.00
 18 8 12 0.28 0.00
 18 8 13 2.18 0.00
 18 8 14 -0.92 0.00
 18 8 15 1.72 0.00
 18 10 0 12.04 0.00
 18 10 1 0.37 0.00
 18 10 2 -0.70 0.00
 18 10 3 -2.59 0.00
 18 10 4 -2.28 0.00
 18 10 5 2.41 0.00
 18 10 6 -2.82 0.00
 18 10 7 4.14 0.00
 18 10 8 4.69 0.00
 18 10 9 0.86 0.00
 18 10 10 1.43 0.00
 18 10 11 3.55 0.00
 18 10 12 1.21 0.00
 18 10 13 3.40 0.00
 18 10 14 2.86 0.00
 18 10 15 -1.89 0.00
 18 12 0 -5.93 0.00
 18 12 1 0.68 0.00
 18 12 2 11.84 0.00
 18 12 3 -3.60 0.00
 18 12 4 4.42 0.00
 18 12 5 -0.71 0.00
 18 12 6 -9.08 0.00
 18 12 7 8.82 0.00
 18 12 8 0.13 0.00
 18 12 9 -1.91 0.00
 18 12 10 -0.93 0.00
 18 12 11 -3.47 0.00
 18 12 12 -5.72 0.00
 18 12 13 -1.56 0.00
 18 12 14 5.00 0.00
 18 12 15 0.37 0.00
 18 14 0 5.18 0.00
 18 14 1 -2.00 0.00
 18 14 2 -0.97 0.00
 18 14 3 -7.41 0.00
 18 14 4 5.88 0.00
 18 14 5 -0.41 0.00
 18 14 6 -0.49 0.00
 18 14 7 -5.29 0.00
 18 14 8 1.47 0.00
 18 14 9 -0.85 0.00
 18 14 10 -1.26 0.00
 18 14 11 -4.26 0.00
 18 14 12 2.85 0.00
 18 14 13 -2.89 0.00
 18 14 14 0.10 0.00
 18 14 15 0.94 0.00
 18 16 0 -16.43 0.00
 18 16 1 -6.08 0.00
 18 16 2 -12.37 0.00
 18 16 3 -10.10 0.00
 18 16 4 -2.16 0.00
 18 16 5 -6.26 0.00
 18 16 6 0.49 0.00
 18 16 7 -2.59 0.00
 18 16 8 2.88 0.00
 18 16 9 -2.03 0.00
 18 16 10 -2.88 0.00
 18 16 11 -2.53 0.00
 18 16 12 -2.72 0.00
 18 16 13 1.00 0.00
 18 16 14 3.29 0.00
 18 18 0 11.44 0.00
 18 18 1 8.49 0.00
 18 18 2 -3.11 0.00
 18 18 3 3.20 0.00
 18 18 4 -0.71 0.00
 18 18 5 0.93 0.00
 18 18 6 -5.47 0.00
 18 18 7 3.27 0.00
 18 18 8 -1.05 0.00
 18 18 9 2.85 0.00
 18 18 10 -1.87 0.00
 18 18 11 3.68 0.00
 18 18 12 -3.83 0.00
 18 18 13 5.86 0.00
 18 18 14 2.19 0.00
 18 20 0 2.25 0.00
 18 20 1 1.38 0.00
 18 20 2 9.31 0.00
 18 20 3 -2.92 0.00
 18 20 4 0.74 0.00
 18 20 5 -1.18 0.00
 18 20 6 3.55 0.00
 18 20 7 0.66 0.00
 18 20 8 -3.75 0.00
 18 20 9 -1.48 0.00
 18 20 10 0.44 0.00
 18 20 11 -2.05 0.00
 18 20 12 -3.80 0.00
 18 20 13 -0.90 0.00
 18 22 0 9.35 0.00
 18 22 1 -0.62 0.00
 18 22 2 -1.63 0.00
 18 22 3 -3.97 0.00
 18 22 4 -0.24 0.00
 18 22 5 6.26 0.00
 18 22 6 -2.06 0.00
 18 22 7 5.26 0.00
 18 22 8 0.19 0.00
 18 22 9 0.76 0.00
 18 22 10 2.58 0.00
 18 22 11 -0.71 0.00
 18 22 12 -1.09 0.00
 18 22 13 10.11 0.00
 18 24 0 -1.14 0.00
 18 24 1 -4.51 0.00
 18 24 2 0.79 0.00
 18 24 3 -10.93 0.00
 18 24 4 -3.60 0.00
 18 24 5 7.35 0.00
 18 24 6 5.68 0.00
 18 24 7 5.54 0.00
 18 24 8 -3.68 0.00
 18 24 9 -0.13 0.00
 18 24 10 5.01 0.00
 18 24 11 1.31 0.00
 18 24 12 -2.35 0.00
 18 26 0 -5.25 0.00
 18 26 1 0.09 0.00
 18 26 2 -8.39 0.00
 18 26 3 9.83 0.00
 18 26 4 -0.73 0.00
 18 26 5 4.29 0.00
 18 26 6 -0.70 0.00
 18 26 7 5.55 0.00
 18 26 8 -4.15 0.00
 18 26 9 5.26 0.00
 18 26 10 1.92 0.00
 18 26 11 1.81 0.00
 18 28 0 -0.68 0.00
 18 28 1 6.99 0.00
 18 28 2 -4.08 0.00
 18 28 3 -3.74 0.00
 18 28 4 -0.01 0.00
 18 28 5 0.65 0.00
 18 28 6 -0.46 0.00
 18 28 7 -4.57 0.00
 18 28 8 -3.64 0.00
 18 28 9 -2.17 0.00
 18 28 10 -8.64 0.00
 18 30 0 4.46 0.00
 18 30 1 1.20 0.00
 18 30 2 3.12 0.00
 18 30 3 5.42 0.00
 18 30 4 4.74 0.00
 18 30 5 1.76 0.00
 18 30 6 -0.45 0.00
 18 30 7 -3.43 0.00
 18 30 8 2.92 0.00
 18 30 9 -2.34 0.00
 18 32 0 0.09 0.00
 18 32 1 -2.24 0.00
 18 32 2 -0.07 0.00
 18 32 3 0.59 0.00
 18 32 4 0.79 0.00
 18 32 5 -3.57 0.00
 18 32 6 -0.88 0.00
 18 32 7 0.43 0.00
 18 32 8 -0.38 0.00
 18 34 0 -5.66 0.00
 18 34 1 -6.80 0.00
 18 34 2 2.18 0.00
 18 34 3 -2.16 0.00
 18 34 4 -3.40 0.00
 18 34 5 1.14 0.00
 18 34 6 0.04 0.00
 18 34 7 -4.51 0.00
 18 36 0 -0.68 0.00
 18 36 1 0.28 0.00
 18 36 2 -2.79 0.00
 18 36 3 -1.28 0.00
 18 36 4 9.15 0.00
 18 36 5 3.29 0.00
 18 36 6 -9.10 0.00
 18 38 0 7.27 0.00
 18 38 1 2.93 0.00
 18 38 2 -1.48 0.00
 18 38 3 3.25 0.00
 18 38 4 -5.24 0.00
 19 1 0 1.56 0.00
 19 1 1 2.67 0.00
 19 1 2 3.87 0.00
 19 1 3 1.01 0.00
 19 1 4 -0.61 0.00
 19 1 5 1.50 0.00
 19 1 6 -4.54 0.00
 19 1 7 -3.31 0.00
 19 1 8 18.47 0.00
 19 1 9 2.85 0.00
 19 1 10 6.55 0.00
 19 1 11 5.35 0.00
 19 1 12 0.59 0.00
 19 1 13 -1.85 0.00
 19 1 14 -0.45 0.00
 19 1 15 1.78 0.00
 19 3 0 4.81 0.00
 19 3 1 1.75 0.00
 19 3 2 6.36 0.00
 19 3 3 -4.39 0.00
 19 3 4 -3.21 0.00
 19 3 5 -1.09 0.00
 19 3 6 -13.64 0.00
 19 3 7 -11.67 0.00
 19 3 8 0.81 0.00
 19 3 9 0.86 0.00
 19 3 10 0.23 0.00
 19 3 11 3.36 0.00
 19 3 12 -2.96 0.00
 19 3 13 1.41 0.00
 19 3 14 -0.55 0.00
 19 3 15 2.24 0.00
 19 5 0 -9.16 0.00
 19 5 1 -9.53 0.00
 19 5 2 9.24 0.00
 19 5 3 -0.83 0.00
 19 5 4 3.39 0.00
 19 5 5 3.68 0.00
 19 5 6 -2.34 0.00
 19 5 7 -3.31 0.00
 19 5 8 -0.39 0.00
 19 5 9 0.19 0.00
 19 5 10 0.63 0.00
 19 5 11 -2.88 0.00
 19 5 12 -3.67 0.00
 19 5 13 -0.48 0.00
 19 5 14 -0.18 0.00
 19 5 15 -0.04 0.00
 19 7 0 -4.41 0.00
 19 7 1 -2.65 0.00
 19 7 2 -0.56 0.00
 19 7 3 -2.11 0.00
 19 7 4 -5.61 0.00
 19 7 5 -8.79 0.00
 19 7 6 -10.48 0.00
 19 7 7 6.81 0.00
 19 7 8 -14.19 0.00
 19 7 9 -0.34 0.00
 19 7 10 -2.84 0.00
 19 7 11 -2.56 0.00
 19 7 12 -2.80 0.00
 19 7 13 2.33 0.00
 19 7 14 3.92 0.00
 19 7 15 -4.01 0.00
 19 9 0 -14.24 0.00
 19 9 1 -13.62 0.00
 19 9 2 3.14 0.00
 19 9 3 -0.21 0.00
 19 9 4 2.65 0.00
 19 9 5 -4.40 0.00
 19 9 6 -1.98 0.00
 19 9 7 -7.11 0.00
 19 9 8 -3.13 0.00
 19 9 9 4.71 0.00
 19 9 10 1.04 0.00
 19 9 11 2.32 0.00
 19 9 12 -0.69 0.00
 19 9 13 3.95 0.00
 19 9 14 -2.38 0.00
 19 9 15 -5.96 0.00
 19 11 0 -0.26 0.00
 19 11 1 -2.89 0.00
 19 11 2 -4.87 0.00
 19 11 3 -0.20 0.00
 19 11 4 1.57 0.00
 19 11 5 2.23 0.00
 19 11 6 -1.43 0.00
 19 11 7 8.39 0.00
 19 11 8 -1.39 0.00
 19 11 9 2.51 0.00
 19 11 10 -1.84 0.00
 19 11 11 2.21 0.00
 19 11 12 2.02 0.00
 19 11 13 3.35 0.00
 19 11 14 -0.65 0.00
 19 13 0 -1.40 0.00
 19 13 1 2.10 0.00
 19 13 2 9.01 0.00
 19 13 3 1.39 0.00
 19 13 4 11.03 0.00
 19 13 5 5.25 0.00
 19 13 6 7.79 0.00
 19 13 7 -4.49 0.00
 19 13 8 6.12 0.00
 19 13 9 -3.55 0.00
 19 13 10 2.53 0.00
 19 13 11 -3.74 0.00
 19 13 12 1.93 0.00
 19 13 13 0.99 0.00
 19 13 14 3.81 0.00
 19 15 0 9.26 0.00
 19 15 1 -7.36 0.00
 19 15 2 -2.29 0.00
 19 15 3 -0.60 0.00
 19 15 4 3.73 0.00
 19 15 5 -3.32 0.00
 19 15 6 1.01 0.00
 19 15 7 7.20 0.00
 19 15 8 1.24 0.00
 19 15 9 1.03 0.00
 19 15 10 -1.60 0.00
 19 15 11 2.91 0.00
 19 15 12 2.38 0.00
 19 15 13 2.14 0.00
 19 15 14 5.34 0.00
 19 17 0 -4.07 0.00
 19 17 1 10.04 0.00
 19 17 2 -3.36 0.00
 19 17 3 6.94 0.00
 19 17 4 -2.16 0.00
 19 17 5 5.17 0.00
 19 17 6 -9.66 0.00
 19 17 7 -0.95 0.00
 19 17 8 -3.43 0.00
 19 17 9 6.03 0.00
 19 17 10 -5.47 0.00
 19 17 11 5.89 0.00
 19 17 12 1.41 0.00
 19 17 13 2.74 0.00
 19 19 0 0.30 0.00
 19 19 1 2.08 0.00
 19 19 2 -6.38 0.00
 19 19 3 -12.20 0.00
 19 19 4 -0.38 0.00
 19 19 5 -5.76 0.00
 19 19 6 -5.14 0.00
 19 19 7 -7.52 0.00
 19 19 8 -3.26 0.00
 19 19 9 -3.06 0.00
 19 19 10 -3.25 0.00
 19 19 11 -2.20 0.00
 19 19 12 -5.91 0.00
 19 19 13 -0.12 0.00
 19 21 0 -1.15 0.00
 19 21 1 0.01 0.00
 19 21 2 -2.93 0.00
 19 21 3 -2.19 0.00
 19 21 4 9.52 0.00
 19 21 5 -9.24 0.00
 19 21 6 5.54 0.00
 19 21 7 -6.75 0.00
 19 21 8 2.31 0.00
 19 21 9 -1.58 0.00
 19 21 10 -1.03 0.00
 19 21 11 -1.31 0.00
 19 21 12 -7.73 0.00
 19 23 0 2.54 0.00
 19 23 1 3.95 0.00
 19 23 2 14.09 0.00
 19 23 3 1.43 0.00
 19 23 4 4.83 0.00
 19 23 5 -2.06 0.00
 19 23 6 5.85 0.00
 19 23 7 0.28 0.00
 19 23 8 -2.17 0.00
 19 23 9 -0.71 0.00
 19 23 10 2.02 0.00
 19 23 11 4.57 0.00
 19 25 0 1.22 0.00
 19 25 1 1.28 0.00
 19 25 2 2.26 0.00
 19 25 3 13.48 0.00
 19 25 4 5.98 0.00
 19 25 5 8.15 0.00
 19 25 6 -1.00 0.00
 19 25 7 0.73 0.00
 19 25 8 -5.06 0.00
 19 25 9 2.29 0.00
 19 25 10 -2.81 0.00
 19 27 0 7.94 0.00
 19 27 1 -1.46 0.00
 19 27 2 2.21 0.00
 19 27 3 1.33 0.00
 19 27 4 2.52 0.00
 19 27 5 7.77 0.00
 19 27 6 4.49 0.00
 19 27 7 1.77 0.00
 19 27 8 2.56 0.00
 19 27 9 0.77 0.00
 19 27 10 -0.70 0.00
 19 29 0 -3.97 0.00
 19 29 1 -2.49 0.00
 19 29 2 3.47 0.00
 19 29 3 2.85 0.00
 19 29 4 10.49 0.00
 19 29 5 2.83 0.00
 19 29 6 6.14 0.00
 19 29 7 4.05 0.00
 19 29 8 -0.21 0.00
 19 29 9 -2.77 0.00
 19 31 0 -5.98 0.00
 19 31 1 -6.08 0.00
 19 31 2 -6.27 0.00
 19 31 3 3.63 0.00
 19 31 4 -1.73 0.00
 19 31 5 3.71 0.00
 19 31 6 -1.96 0.00
 19 31 7 -0.24 0.00
 19 31 8 0.82 0.00
 19 33 0 -5.16 0.00
 19 33 1 -1.59 0.00
 19 33 2 -4.77 0.00
 19 33 3 -2.63 0.00
 19 33 4 -3.29 0.00
 19 33 5 4.23 0.00
 19 33 6 -3.79 0.00
 19 33 7 1.01 0.00
 19 35 0 -0.96 0.00
 19 35 1 0.48 0.00
 19 35 2 0.46 0.00
 19 35 3 -2.67 0.00
 19 35 4 -1.33 0.00
 19 35 5 -6.68 0.00
 19 35 6 3.64 0.00
 19 37 0 -0.27 0.00
 19 37 1 0.34 0.00
 19 37 2 0.39 0.00
 19 37 3 -2.23 0.00
 19 37 4 3.27 0.00
 20 0 0 0.36 0.00
 20 0 1 -4.42 0.00
 20 0 2 -0.99 0.00
 20 0 3 -11.08 0.00
 20 0 4 14.79 0.00
 20 0 5 7.27 0.00
 20 0 6 0.17 0.00
 20 0 7 -2.03 0.00
 20 0 8 6.48 0.00
 20 0 9 -6.94 0.00
 20 0 10 -3.23 0.00
 20 0 11 -2.94 0.00
 20 0 12 8.97 0.00
 20 0 13 2.72 0.00
 20 0 14 7.92 0.00
 20 2 0 -4.57 0.00
 20 2 1 2.70 0.00
 20 2 2 3.83 0.00
 20 2 3 -2.24 0.00
 20 2 4 -4.14 0.00
 20 2 5 5.01 0.00
 20 2 6 0.10 0.00
 20 2 7 3.86 0.00
 20 2 8 2.94 0.00
 20 2 9 -5.22 0.00
 20 2 10 -10.27 0.00
 20 2 11 3.85 0.00
 20 2 12 -2.24 0.00
 20 2 13 4.12 0.00
 20 2 14 0.60 0.00
 20 4 0 -7.27 0.00
 20 4 1 -0.51 0.00
 20 4 2 -6.64 0.00
 20 4 3 -0.92 0.00
 20 4 4 -2.55 0.00
 20 4 5 3.93 0.00
 20 4 6 2.98 0.00
 20 4 7 1.77 0.00
 20 4 8 1.04 0.00
 20 4 9 -5.73 0.00
 20 4 10 -5.16 0.00
 20 4 11 3.45 0.00
 20 4 12 -3.12 0.00
 20 4 13 -1.13 0.00
 20 4 14 3.51 0.00
 20 6 0 0.96 0.00
 20 6 1 -4.90 0.00
 20 6 2 0.50 0.00
 20 6 3 0.98 0.00
 20 6 4 -0.98 0.00
 20 6 5 -3.24 0.00
 20 6 6 0.75 0.00
 20 6 7 -1.83 0.00
 20 6 8 -0.63 0.00
 20 6 9 1.23 0.00
 20 6 10 2.74 0.00
 20 6 11 0.96 0.00
 20 6 12 1.97 0.00
 20 6 13 -4.58 0.00
 20 6 14 3.60 0.00
 20 8 0 -2.99 0.00
 20 8 1 2.07 0.00
 20 8 2 1.27 0.00
 20 8 3 9.89 0.00
 20 8 4 1.59 0.00
 20 8 5 5.28 0.00
 20 8 6 7.34 0.00
 20 8 7 10.32 0.00
 20 8 8 -3.64 0.00
 20 8 9 -1.98 0.00
 20 8 10 0.29 0.00
 20 8 11 -2.32 0.00
 20 8 12 2.89 0.00
 20 8 13 -5.24 0.00
 20 8 14 -2.81 0.00
 20 10 0 7.92 0.00
 20 10 1 5.68 0.00
 20 10 2 -6.22 0.00
 20 10 3 6.48 0.00
 20 10 4 1.14 0.00
 20 10 5 -0.59 0.00
 20 10 6 8.88 0.00
 20 10 7 2.50 0.00
 20 10 8 2.49 0.00
 20 10 9 -0.52 0.00
 20 10 10 -2.19 0.00
 20 10 11 -2.10 0.00
 20 10 12 1.93 0.00
 20 10 13 0.34 0.00
 20 10 14 -0.99 0.00
 20 12 0 -14.22 0.00
 20 12 1 6.45 0.00
 20 12 2 3.45 0.00
 20 12 3 11.65 0.00
 20 12 4 -3.40 0.00
 20 12 5 -1.69 0.00
 20 12 6 7.40 0.00
 20 12 7 2.53 0.00
 20 12 8 7.91 0.00
 20 12 9 -2.30 0.00
 20 12 10 1.48 0.00
 20 12 11 -0.15 0.00
 20 12 12 -2.22 0.00
 20 12 13 4.60 0.00
 20 12 14 -1.88 0.00
 20 14 0 14.82 0.00
 20 14 1 4.95 0.00
 20 14 2 0.18 0.00
 20 14 3 2.93 0.00
 20 14 4 -0.02 0.00
 20 14 5 3.22 0.00
 20 14 6 4.44 0.00
 20 14 7 -0.66 0.00
 20 14 8 1.52 0.00
 20 14 9 1.51 0.00
 20 14 10 -0.29 0.00
 20 14 11 6.63 0.00
 20 14 12 5.53 0.00
 20 14 13 0.76 0.00
 20 16 0 0.14 0.00
 20 16 1 -3.17 0.00
 20 16 2 4.04 0.00
 20 16 3 -1.08 0.00
 20 16 4 -6.20 0.00
 20 16 5 2.57 0.00
 20 16 6 -0.50 0.00
 20 16 7 -2.45 0.00
 20 16 8 -1.38 0.00
 20 16 9 -4.23 0.00
 20 16 10 -4.49 0.00
 20 16 11 2.04 0.00
 20 16 12 3.52 0.00
 20 16 13 -0.10 0.00
 20 18 0 1.72 0.00
 20 18 1 5.57 0.00
 20 18 2 -0.55 0.00
 20 18 3 0.65 0.00
 20 18 4 2.10 0.00
 20 18 5 0.26 0.00
 20 18 6 -5.55 0.00
 20 18 7 -0.74 0.00
 20 18 8 -2.60 0.00
 20 18 9 -9.89 0.00
 20 18 10 -1.59 0.00
 20 18 11 1.25 0.00
 20 18 12 -4.86 0.00
 20 20 0 -32.44 0.00
 20 20 1 -1.43 0.00
 20 20 2 -1.65 0.00
 20 20 3 -1.29 0.00
 20 20 4 -2.53 0.00
 20 20 5 -7.15 0.00
 20 20 6 0.95 0.00
 20 20 7 -3.21 0.00
 20 20 8 0.60 0.00
 20 20 9 -5.35 0.00
 20 20 10 1.53 0.00
 20 20 11 -2.35 0.00
 20 20 12 0.96 0.00
 20 22 0 -8.86 0.00
 20 22 1 1.45 0.00
 20 22 2 -4.91 0.00
 20 22 3 -1.88 0.00
 20 22 4 1.16 0.00
 20 22 5 -5.94 0.00
 20 22 6 1.14 0.00
 20 22 7 1.51 0.00
 20 22 8 2.86 0.00
 20 22 9 -0.13 0.00
 20 22 10 1.64 0.00
 20 22 11 3.38 0.00
 20 24 0 -3.88 0.00
 20 24 1 1.52 0.00
 20 24 2 1.76 0.00
 20 24 3 1.01 0.00
 20 24 4 -5.39 0.00
 20 24 5 -3.50 0.00
 20 24 6 4.28 0.00
 20 24 7 0.17 0.00
 20 24 8 0.78 0.00
 20 24 9 2.12 0.00
 20 24 10 1.81 0.00
 20 26 0 5.43 0.00
 20 26 1 1.89 0.00
 20 26 2 0.58 0.00
 20 26 3 18.33 0.00
 20 26 4 -4.91 0.00
 20 26 5 -4.72 0.00
 20 26 6 -1.81 0.00
 20 26 7 2.07 0.00
 20 26 8 -1.14 0.00
 20 26 9 -2.65 0.00
 20 28 0 7.51 0.00
 20 28 1 -1.17 0.00
 20 28 2 3.91 0.00
 20 28 3 -8.73 0.00
 20 28 4 1.94 0.00
 20 28 5 -5.79 0.00
 20 28 6 -2.80 0.00
 20 28 7 1.41 0.00
 20 28 8 -1.21 0.00
 20 28 9 -2.41 0.00
 20 30 0 1.95 0.00
 20 30 1 -3.65 0.00
 20 30 2 3.25 0.00
 20 30 3 0.24 0.00
 20 30 4 1.24 0.00
 20 30 5 0.05 0.00
 20 30 6 -2.37 0.00
 20 30 7 8.64 0.00
 20 30 8 1.27 0.00
 20 32 0 -3.12 0.00
 20 32 1 3.42 0.00
 20 32 2 -2.39 0.00
 20 32 3 -0.71 0.00
 20 32 4 -1.92 0.00
 20 32 5 -4.67 0.00
 20 32 6 -4.49 0.00
 20 32 7 3.76 0.00
 20 34 0 -3.27 0.00
 20 34 1 -1.54 0.00
 20 34 2 -2.03 0.00
 20 34 3 -0.59 0.00
 20 34 4 -7.15 0.00
 20 34 5 4.47 0.00
 20 34 6 9.40 0.00
 20 36 0 5.32 0.00
 20 36 1 3.06 0.00
 20 36 2 3.76 0.00
 20 36 3 5.28 0.00
 21 1 0 2.34 0.00
 21 1 1 -4.28 0.00
 21 1 2 -0.58 0.00
 21 1 3 1.17 0.00
 21 1 4 5.73 0.00
 21 1 5 3.70 0.00
 21 1 6 4.44 0.00
 21 1 7 8.04 0.00
 21 1 8 -3.14 0.00
 21 1 9 -2.10 0.00
 21 1 10 -1.16 0.00
 21 1 11 -3.06 0.00
 21 1 12 6.90 0.00
 21 1 13 0.80 0.00
 21 1 14 -5.65 0.00
 21 3 0 -10.80 0.00
 21 3 1 -0.60 0.00
 21 3 2 -9.25 0.00
 21 3 3 -2.13 0.00
 21 3 4 -7.56 0.00
 21 3 5 -1.68 0.00
 21 3 6 -4.95 0.00
 21 3 7 -0.92 0.00
 21 3 8 -9.01 0.00
 21 3 9 -0.76 0.00
 21 3 10 -4.04 0.00
 21 3 11 -0.32 0.00
 21 3 12 8.27 0.00
 21 3 13 -0.45 0.00
 21 3 14 -0.78 0.00
 21 5 0 -1.89 0.00
 21 5 1 2.47 0.00
 21 5 2 -2.47 0.00
 21 5 3 1.84 0.00
 21 5 4 1.21 0.00
 21 5 5 3.56 0.00
 21 5 6 6.23 0.00
 21 5 7 -3.74 0.00
 21 5 8 0.44 0.00
 21 5 9 0.28 0.00
 21 5 10 -2.01 0.00
 21 5 11 -3.05 0.00
 21 5 12 2.72 0.00
 21 5 13 -5.83 0.00
 21 5 14 0.43 0.00
 21 7 0 10.28 0.00
 21 7 1 5.75 0.00
 21 7 2 5.18 0.00
 21 7 3 2.64 0.00
 21 7 4 1.61 0.00
 21 7 5 -4.00 0.00
 21 7 6 6.28 0.00
 21 7 7 5.78 0.00
 21 7 8 1.99 0.00
 21 7 9 -2.04 0.00
 21 7 10 3.75 0.00
 21 7 11 -1.23 0.00
 21 7 12 5.34 0.00
 21 7 13 -2.90 0.00
 21 7 14 4.80 0.00
 21 9 0 7.47 0.00
 21 9 1 5.55 0.00
 21 9 2 2.95 0.00
 21 9 3 12.18 0.00
 21 9 4 1.33 0.00
 21 9 5 -0.12 0.00
 21 9 6 -1.46 0.00
 21 9 7 -11.24 0.00
 21 9 8 3.58 0.00
 21 9 9 -3.42 0.00
 21 9 10 1.07 0.00
 21 9 11 -3.58 0.00
 21 9 12 -1.91 0.00
 21 9 13 -2.18 0.00
 21 11 0 0.70 0.00
 21 11 1 1.32 0.00
 21 11 2 -4.51 0.00
 21 11 3 -2.19 0.00
 21 11 4 -8.80 0.00
 21 11 5 -2.44 0.00
 21 11 6 -7.08 0.00
 21 11 7 -3.44 0.00
 21 11 8 -2.23 0.00
 21 11 9 -0.26 0.00
 21 11 10 -0.43 0.00
 21 11 11 3.91 0.00
 21 11 12 1.89 0.00
 21 11 13 -0.72 0.00
 21 13 0 0.22 0.00
 21 13 1 -1.55 0.00
 21 13 2 3.20 0.00
 21 13 3 -0.18 0.00
 21 13 4 0.79 0.00
 21 13 5 2.24 0.00
 21 13 6 -0.36 0.00
 21 13 7 -8.86 0.00
 21 13 8 0.21 0.00
 21 13 9 0.49 0.00
 21 13 10 1.89 0.00
 21 13 11 -2.45 0.00
 21 13 12 0.05 0.00
 21 13 13 -1.44 0.00
 21 15 0 -4.65 0.00
 21 15 1 -6.08 0.00
 21 15 2 3.87 0.00
 21 15 3 0.04 0.00
 21 15 4 -0.21 0.00
 21 15 5 -3.81 0.00
 21 15 6 4.30 0.00
 21 15 7 -0.20 0.00
 21 15 8 2.61 0.00
 21 15 9 0.92 0.00
 21 15 10 0.37 0.00
 21 15 11 -2.93 0.00
 21 15 12 -6.46 0.00
 21 17 0 -8.59 0.00
 21 17 1 6.98 0.00
 21 17 2 -1.57 0.00
 21 17 3 4.92 0.00
 21 17 4 3.28 0.00
 21 17 5 4.82 0.00
 21 17 6 -0.43 0.00
 21 17 7 -1.86 0.00
 21 17 8 2.60 0.00
 21 17 9 1.97 0.00
 21 17 10 0.83 0.00
 21 17 11 3.22 0.00
 21 17 12 0.55 0.00
 21 19 0 -7.93 0.00
 21 19 1 -1.77 0.00
 21 19 2 3.60 0.00
 21 19 3 -7.09 0.00
 21 19 4 -0.21 0.00
 21 19 5 4.60 0.00
 21 19 6 3.06 0.00
 21 19 7 1.75 0.00
 21 19 8 -0.01 0.00
 21 19 9 -0.94 0.00
 21 19 10 3.19 0.00
 21 19 11 1.97 0.00
 21 21 0 -2.94 0.00
 21 21 1 -2.04 0.00
 21 21 2 -2.08 0.00
 21 21 3 0.56 0.00
 21 21 4 -1.30 0.00
 21 21 5 1.52 0.00
 21 21 6 -3.66 0.00
 21 21 7 4.86 0.00
 21 21 8 -5.58 0.00
 21 21 9 2.93 0.00
 21 21 10 5.00 0.00
 21 23 0 -6.52 0.00
 21 23 1 1.51 0.00
 21 23 2 3.08 0.00
 21 23 3 3.68 0.00
 21 23 4 -15.11 0.00
 21 23 5 0.52 0.00
 21 23 6 -3.33 0.00
 21 23 7 7.23 0.00
 21 23 8 -3.11 0.00
 21 23 9 -2.81 0.00
 21 23 10 10.26 0.00
 21 25 0 -7.54 0.00
 21 25 1 -3.52 0.00
 21 25 2 -9.83 0.00
 21 25 3 1.93 0.00
 21 25 4 -4.43 0.00
 21 25 5 -6.20 0.00
 21 25 6 -2.37 0.00
 21 25 7 -6.17 0.00
 21 25 8 -3.08 0.00
 21 25 9 -6.52 0.00
 21 27 0 -2.78 0.00
 21 27 1 -0.36 0.00
 21 27 2 -9.82 0.00
 21 27 3 -1.12 0.00
 21 27 4 -14.03 0.00
 21 27 5 -0.70 0.00
 21 27 6 -3.47 0.00
 21 27 7 5.54 0.00
 21 27 8 -2.81 0.00
 21 29 0 -1.55 0.00
 21 29 1 5.38 0.00
 21 29 2 -1.88 0.00
 21 29 3 0.49 0.00
 21 29 4 1.35 0.00
 21 29 5 -3.30 0.00
 21 29 6 -1.36 0.00
 21 29 7 8.09 0.00
 21 29 8 -10.45 0.00
 21 31 0 5.70 0.00
 21 31 1 3.41 0.00
 21 31 2 2.24 0.00
 21 31 3 5.71 0.00
 21 31 4 0.30 0.00
 21 31 5 -3.57 0.00
 21 31 6 5.21 0.00
 21 31 7 6.00 0.00
 21 33 0 5.52 0.00
 21 33 1 -0.87 0.00
 21 33 2 3.91 0.00
 21 33 3 -2.88 0.00
 21 33 4 3.31 0.00
 21 33 5 -8.39 0.00
 22 0 0 0.39 0.00
 22 0 1 2.41 0.00
 22 0 2 -3.66 0.00
 22 0 3 4.77 0.00
 22 0 4 3.71 0.00
 22 0 5 -7.30 0.00
 22 0 6 -4.16 0.00
 22 0 7 0.55 0.00
 22 0 8 -2.47 0.00
 22 0 9 5.64 0.00
 22 0 10 4.22 0.00
 22 0 11 -4.66 0.00
 22 0 12 3.85 0.00
 22 0 13 -4.19 0.00
 22 2 0 1.68 0.00
 22 2 1 -7.32 0.00
 22 2 2 1.96 0.00
 22 2 3 -4.95 0.00
 22 2 4 -2.72 0.00
 22 2 5 -0.81 0.00
 22 2 6 3.52 0.00
 22 2 7 2.95 0.00
 22 2 8 -8.68 0.00
 22 2 9 7.77 0.00
 22 2 10 1.91 0.00
 22 2 11 -2.41 0.00
 22 2 12 -1.68 0.00
 22 2 13 -3.02 0.00
 22 4 0 4.59 0.00
 22 4 1 1.34 0.00
 22 4 2 7.02 0.00
 22 4 3 -0.14 0.00
 22 4 4 -1.54 0.00
 22 4 5 -4.97 0.00
 22 4 6 4.39 0.00
 22 4 7 0.64 0.00
 22 4 8 -1.04 0.00
 22 4 9 2.18 0.00
 22 4 10 8.10 0.00
 22 4 11 -1.38 0.00
 22 4 12 3.49 0.00
 22 4 13 -3.14 0.00
 22 6 0 4.22 0.00
 22 6 1 7.52 0.00
 22 6 2 3.74 0.00
 22 6 3 0.99 0.00
 22 6 4 -1.34 0.00
 22 6 5 4.86 0.00
 22 6 6 4.98 0.00
 22 6 7 1.83 0.00
 22 6 8 1.00 0.00
 22 6 9 4.55 0.00
 22 6 10 4.48 0.00
 22 6 11 0.92 0.00
 22 6 12 0.32 0.00
 22 6 13 -0.49 0.00
 22 8 0 2.14 0.00
 22 8 1 3.85 0.00
 22 8 2 -0.82 0.00
 22 8 3 5.14 0.00
 22 8 4 -9.64 0.00
 22 8 5 0.90 0.00
 22 8 6 -3.77 0.00
 22 8 7 1.04 0.00
 22 8 8 -7.17 0.00
 22 8 9 -2.20 0.00
 22 8 10 -2.66 0.00
 22 8 11 1.31 0.00
 22 8 12 -1.93 0.00
 22 8 13 0.76 0.00
 22 10 0 7.74 0.00
 22 10 1 -6.75 0.00
 22 10 2 -6.08 0.00
 22 10 3 -9.31 0.00
 22 10 4 -4.30 0.00
 22 10 5 -2.83 0.00
 22 10 6 -1.07 0.00
 22 10 7 -0.90 0.00
 22 10 8 -1.20 0.00
 22 10 9 -1.15 0.00
 22 10 10 -3.89 0.00
 22 10 11 0.32 0.00
 22 10 12 0.32 0.00
 22 10 13 7.25 0.00
 22 12 0 -4.11 0.00
 22 12 1 -9.93 0.00
 22 12 2 4.39 0.00
 22 12 3 -2.37 0.00
 22 12 4 -4.45 0.00
 22 12 5 -3.02 0.00
 22 12 6 -4.27 0.00
 22 12 7 -0.45 0.00
 22 12 8 2.05 0.00
 22 12 9 0.60 0.00
 22 12 10 -1.30 0.00
 22 12 11 -5.05 0.00
 22 12 12 -4.18 0.00
 22 14 0 0.77 0.00
 22 14 1 -1.57 0.00
 22 14 2 -5.57 0.00
 22 14 3 -6.00 0.00
 22 14 4 0.81 0.00
 22 14 5 0.82 0.00
 22 14 6 -2.88 0.00
 22 14 7 -1.26 0.00
 22 14 8 -2.10 0.00
 22 14 9 -0.45 0.00
 22 14 10 -2.96 0.00
 22 14 11 -3.69 0.00
 22 14 12 1.26 0.00
 22 16 0 -1.41 0.00
 22 16 1 -0.33 0.00
 22 16 2 -2.73 0.00
 22 16 3 0.90 0.00
 22 16 4 -2.93 0.00
 22 16 5 5.04 0.00
 22 16 6 0.39 0.00
 22 16 7 -1.82 0.00
 22 16 8 3.20 0.00
 22 16 9 4.51 0.00
 22 16 10 -1.34 0.00
 22 16 11 -6.10 0.00
 22 18 0 6.80 0.00
 22 18 1 -3.49 0.00
 22 18 2 -3.91 0.00
 22 18 3 -4.07 0.00
 22 18 4 4.75 0.00
 22 18 5 0.94 0.00
 22 18 6 1.84 0.00
 22 18 7 2.95 0.00
 22 18 8 0.33 0.00
 22 18 9 2.89 0.00
 22 18 10 1.74 0.00
 22 18 11 -2.15 0.00
 22 20 0 -1.36 0.00
 22 20 1 -3.36 0.00
 22 20 2 3.30 0.00
 22 20 3 4.95 0.00
 22 20 4 0.84 0.00
 22 20 5 2.57 0.00
 22 20 6 -0.43 0.00
 22 20 7 5.97 0.00
 22 20 8 1.19 0.00
 22 20 9 10.55 0.00
 22 20 10 2.19 0.00
 22 22 0 11.42 0.00
 22 22 1 2.57 0.00
 22 22 2 1.62 0.00
 22 22 3 -1.26 0.00
 22 22 4 0.38 0.00
 22 22 5 5.81 0.00
 22 22 6 1.97 0.00
 22 22 7 -1.52 0.00
 22 22 8 -2.33 0.00
 22 22 9 0.26 0.00
 22 24 0 1.86 0.00
 22 24 1 -2.08 0.00
 22 24 2 0.07 0.00
 22 24 3 -1.19 0.00
 22 24 4 -3.03 0.00
 22 24 5 10.18 0.00
 22 24 6 -0.55 0.00
 22 24 7 -3.76 0.00
 22 24 8 -0.03 0.00
 22 24 9 10.82 0.00
 22 26 0 -0.46 0.00
 22 26 1 -0.59 0.00
 22 26 2 -0.59 0.00
 22 26 3 7.28 0.00
 22 26 4 -7.58 0.00
 22 26 5 5.93 0.00
 22 26 6 0.40 0.00
 22 26 7 -5.26 0.00
 22 26 8 -1.72 0.00
 22 28 0 -4.81 0.00
 22 28 1 1.74 0.00
 22 28 2 -3.15 0.00
 22 28 3 -4.96 0.00
 22 28 4 1.10 0.00
 22 28 5 4.73 0.00
 22 28 6 -4.21 0.00
 22 28 7 -4.60 0.00
 22 30 0 -5.08 0.00
 22 30 1 -2.43 0.00
 22 30 2 -1.82 0.00
 22 30 3 5.23 0.00
 22 30 4 0.64 0.00
 22 30 5 2.49 0.00
 22 30 6 5.14 0.00
 22 32 0 1.43 0.00
 22 32 1 3.82 0.00
 22 32 2 -1.69 0.00
 22 32 3 5.24 0.00
 22 32 4 2.86 0.00
 23 1 0 10.74 0.00
 23 1 1 5.16 0.00
 23 1 2 4.41 0.00
 23 1 3 -0.34 0.00
 23 1 4 4.01 0.00
 23 1 5 -0.93 0.00
 23 1 6 -7.38 0.00
 23 1 7 0.44 0.00
 23 1 8 -6.16 0.00
 23 1 9 4.53 0.00
 23 1 10 0.49 0.00
 23 1 11 -1.34 0.00
 23 1 12 -5.93 0.00
 23 1 13 -1.24 0.00
 23 3 0 -3.96 0.00
 23 3 1 -2.69 0.00
 23 3 2 0.04 0.00
 23 3 3 -3.55 0.00
 23 3 4 -0.42 0.00
 23 3 5 -3.05 0.00
 23 3 6 0.41 0.00
 23 3 7 -2.65 0.00
 23 3 8 0.93 0.00
 23 3 9 5.66 0.00
 23 3 10 4.59 0.00
 23 3 11 3.28 0.00
 23 3 12 -2.00 0.00
 23 3 13 2.13 0.00
 23 5 0 3.10 0.00
 23 5 1 -0.57 0.00
 23 5 2 -3.18 0.00
 23 5 3 -1.38 0.00
 23 5 4 0.47 0.00
 23 5 5 2.16 0.00
 23 5 6 -0.07 0.00
 23 5 7 -8.52 0.00
 23 5 8 -1.45 0.00
 23 5 9 1.58 0.00
 23 5 10 -1.60 0.00
 23 5 11 -3.95 0.00
 23 5 12 -9.76 0.00
 23 7 0 -7.13 0.00
 23 7 1 -2.92 0.00
 23 7 2 -1.96 0.00
 23 7 3 4.40 0.00
 23 7 4 -2.81 0.00
 23 7 5 0.94 0.00
 23 7 6 0.32 0.00
 23 7 7 4.47 0.00
 23 7 8 -2.25 0.00
 23 7 9 0.94 0.00
 23 7 10 2.58 0.00
 23 7 11 -0.75 0.00
 23 7 12 -2.70 0.00
 23 9 0 2.13 0.00
 23 9 1 -2.27 0.00
 23 9 2 -6.12 0.00
 23 9 3 7.21 0.00
 23 9 4 1.14 0.00
 23 9 5 3.94 0.00
 23 9 6 -1.62 0.00
 23 9 7 2.61 0.00
 23 9 8 2.33 0.00
 23 9 9 0.81 0.00
 23 9 10 4.29 0.00
 23 9 11 -1.54 0.00
 23 9 12 1.12 0.00
 23 11 0 -8.01 0.00
 23 11 1 -2.90 0.00
 23 11 2 -3.05 0.00
 23 11 3 -2.38 0.00
 23 11 4 -0.17 0.00
 23 11 5 -2.96 0.00
 23 11 6 1.25 0.00
 23 11 7 -0.13 0.00
 23 11 8 3.91 0.00
 23 11 9 -0.58 0.00
 23 11 10 1.68 0.00
 23 11 11 0.91 0.00
 23 11 12 3.18 0.00
 23 13 0 -2.91 0.00
 23 13 1 3.65 0.00
 23 13 2 -9.48 0.00
 23 13 3 3.10 0.00
 23 13 4 -0.13 0.00
 23 13 5 6.61 0.00
 23 13 6 -5.73 0.00
 23 13 7 2.07 0.00
 23 13 8 -4.46 0.00
 23 13 9 0.46 0.00
 23 13 10 -5.33 0.00
 23 13 11 -2.23 0.00
 23 15 0 -0.87 0.00
 23 15 1 -3.90 0.00
 23 15 2 -0.70 0.00
 23 15 3 3.04 0.00
 23 15 4 -4.69 0.00
 23 15 5 0.94 0.00
 23 15 6 -3.51 0.00
 23 15 7 2.17 0.00
 23 15 8 2.98 0.00
 23 15 9 4.90 0.00
 23 15 10 -2.34 0.00
 23 15 11 -6.62 0.00
 23 17 0 18.29 0.00
 23 17 1 0.81 0.00
 23 17 2 -2.80 0.00
 23 17 3 1.58 0.00
 23 17 4 3.89 0.00
 23 17 5 4.27 0.00
 23 17 6 -5.44 0.00
 23 17 7 1.20 0.00
 23 17 8 6.66 0.00
 23 17 9 -0.42 0.00
 23 17 10 4.98 0.00
 23 19 0 9.17 0.00
 23 19 1 3.02 0.00
 23 19 2 5.69 0.00
 23 19 3 1.25 0.00
 23 19 4 3.90 0.00
 23 19 5 3.33 0.00
 23 19 6 3.44 0.00
 23 19 7 -1.94 0.00
 23 19 8 3.53 0.00
 23 19 9 -1.51 0.00
 23 21 0 5.74 0.00
 23 21 1 5.52 0.00
 23 21 2 -3.99 0.00
 23 21 3 -1.61 0.00
 23 21 4 3.45 0.00
 23 21 5 0.66 0.00
 23 21 6 1.47 0.00
 23 21 7 -0.77 0.00
 23 21 8 -0.95 0.00
 23 21 9 1.56 0.00
 23 23 0 3.26 0.00
 23 23 1 -0.01 0.00
 23 23 2 6.97 0.00
 23 23 3 0.91 0.00
 23 23 4 -9.98 0.00
 23 23 5 -0.96 0.00
 23 23 6 0.35 0.00
 23 23 7 -3.65 0.00
 23 23 8 4.72 0.00
 23 25 0 4.11 0.00
 23 25 1 -1.74 0.00
 23 25 2 2.93 0.00
 23 25 3 -5.58 0.00
 23 25 4 0.03 0.00
 23 25 5 3.90 0.00
 23 25 6 -0.16 0.00
 23 25 7 -17.83 0.00
 23 27 0 0.55 0.00
 23 27 1 -2.30 0.00
 23 27 2 6.62 0.00
 23 27 3 -3.52 0.00
 23 27 4 -9.28 0.00
 23 27 5 10.35 0.00
 23 27 6 -8.40 0.00
 23 27 7 -7.99 0.00
 23 29 0 2.27 0.00
 23 29 1 2.64 0.00
 23 29 2 5.87 0.00
 23 29 3 -11.05 0.00
 23 29 4 7.06 0.00
 23 29 5 4.39 0.00
 23 31 1 2.03 0.00
 23 31 2 0.48 0.00
 23 31 3 6.88 0.00
 24 0 0 6.75 0.00
 24 0 1 4.45 0.00
 24 0 2 0.38 0.00
 24 0 3 -0.70 0.00
 24 0 4 5.34 0.00
 24 0 5 -4.48 0.00
 24 0 6 -9.89 0.00
 24 0 7 3.09 0.00
 24 0 8 5.06 0.00
 24 0 9 -2.77 0.00
 24 0 10 -5.51 0.00
 24 0 11 -3.32 0.00
 24 0 12 -2.30 0.00
 24 2 0 1.97 0.00
 24 2 1 1.26 0.00
 24 2 2 -0.84 0.00
 24 2 3 -1.19 0.00
 24 2 4 2.67 0.00
 24 2 5 6.12 0.00
 24 2 6 -1.38 0.00
 24 2 7 3.92 0.00
 24 2 8 -1.17 0.00
 24 2 9 3.79 0.00
 24 2 10 0.86 0.00
 24 2 11 -2.42 0.00
 24 2 12 1.13 0.00
 24 4 0 -1.21 0.00
 24 4 1 2.82 0.00
 24 4 2 1.02 0.00
 24 4 3 3.69 0.00
 24 4 4 -1.87 0.00
 24 4 5 -4.89 0.00
 24 4 6 -0.49 0.00
 24 4 7 -2.17 0.00
 24 4 8 3.82 0.00
 24 4 9 0.47 0.00
 24 4 10 2.84 0.00
 24 4 11 0.74 0.00
 24 4 12 1.88 0.00
 24 6 0 -7.35 0.00
 24 6 1 -2.59 0.00
 24 6 2 -2.80 0.00
 24 6 3 -5.87 0.00
 24 6 4 0.80 0.00
 24 6 5 -0.36 0.00
 24 6 6 2.62 0.00
 24 6 7 -2.23 0.00
 24 6 8 0.55 0.00
 24 6 9 -2.34 0.00
 24 6 10 -3.74 0.00
 24 6 11 0.94 0.00
 24 8 0 -4.53 0.00
 24 8 1 -4.42 0.00
 24 8 2 -3.32 0.00
 24 8 3 1.53 0.00
 24 8 4 -2.34 0.00
 24 8 5 -3.99 0.00
 24 8 6 -3.17 0.00
 24 8 7 -0.92 0.00
 24 8 8 2.46 0.00
 24 8 9 2.63 0.00
 24 8 10 -0.10 0.00
 24 8 11 3.09 0.00
 24 10 0 -5.41 0.00
 24 10 1 -1.81 0.00
 24 10 2 -3.32 0.00
 24 10 3 -3.31 0.00
 24 10 4 2.34 0.00
 24 10 5 -0.60 0.00
 24 10 6 3.75 0.00
 24 10 7 -0.78 0.00
 24 10 8 4.89 0.00
 24 10 9 -2.33 0.00
 24 10 10 3.45 0.00
 24 10 11 0.77 0.00
 24 12 0 1.96 0.00
 24 12 1 4.17 0.00
 24 12 2 2.51 0.00
 24 12 3 5.57 0.00
 24 12 4 -2.83 0.00
 24 12 5 -1.50 0.00
 24 12 6 -5.14 0.00
 24 12 7 -2.99 0.00
 24 12 8 -0.28 0.00
 24 12 9 0.99 0.00
 24 12 10 3.82 0.00
 24 14 0 -8.36 0.00
 24 14 1 4.34 0.00
 24 14 2 -1.31 0.00
 24 14 3 0.37 0.00
 24 14 4 1.15 0.00
 24 14 5 2.12 0.00
 24 14 6 1.41 0.00
 24 14 7 -0.71 0.00
 24 14 8 -5.41 0.00
 24 14 9 -2.09 0.00
 24 14 10 0.96 0.00
 24 16 0 9.83 0.00
 24 16 1 7.79 0.00
 24 16 2 5.32 0.00
 24 16 3 4.32 0.00
 24 16 4 -1.45 0.00
 24 16 5 3.35 0.00
 24 16 6 -0.05 0.00
 24 16 7 -3.90 0.00
 24 16 8 -0.22 0.00
 24 16 9 -0.35 0.00
 24 18 0 6.81 0.00
 24 18 1 2.43 0.00
 24 18 2 4.07 0.00
 24 18 3 -3.45 0.00
 24 18 4 1.21 0.00
 24 18 5 0.95 0.00
 24 18 6 5.51 0.00
 24 18 7 1.24 0.00
 24 18 8 0.22 0.00
 24 18 9 -4.02 0.00
 24 20 0 -0.75 0.00
 24 20 1 1.27 0.00
 24 20 2 0.38 0.00
 24 20 3 6.13 0.00
 24 20 4 -5.47 0.00
 24 20 5 -0.43 0.00
 24 20 6 -10.64 0.00
 24 20 7 6.78 0.00
 24 20 8 -0.22 0.00
 24 22 0 -4.57 0.00
 24 22 1 -4.35 0.00
 24 22 2 -3.70 0.00
 24 22 3 -5.42 0.00
 24 22 4 -9.36 0.00
 24 22 5 3.88 0.00
 24 22 6 -1.64 0.00
 24 22 7 -4.40 0.00
 24 22 8 -2.80 0.00
 24 24 0 0.48 0.00
 24 24 1 0.59 0.00
 24 24 2 3.09 0.00
 24 24 3 5.79 0.00
 24 24 4 4.98 0.00
 24 24 5 13.47 0.00
 24 24 6 -0.82 0.00
 24 24 7 -0.73 0.00
 24 26 0 0.36 0.00
 24 26 1 1.55 0.00
 24 26 2 8.47 0.00
 24 26 3 -1.94 0.00
 24 26 4 1.05 0.00
 24 26 5 4.40 0.00
 24 26 6 8.60 0.00
 24 28 0 -2.60 0.00
 24 28 1 6.81 0.00
 24 28 2 2.60 0.00
 24 28 3 -6.34 0.00
 24 28 4 5.06 0.00
 25 1 0 -4.36 0.00
 25 1 1 -3.82 0.00
 25 1 2 -4.23 0.00
 25 1 3 2.76 0.00
 25 1 4 3.41 0.00
 25 1 5 -1.49 0.00
 25 1 6 0.67 0.00
 25 1 7 2.21 0.00
 25 1 8 -0.66 0.00
 25 1 9 -4.18 0.00
 25 1 10 -0.73 0.00
 25 1 11 -5.73 0.00
 25 3 0 -1.21 0.00
 25 3 1 -5.73 0.00
 25 3 2 4.01 0.00
 25 3 3 2.62 0.00
 25 3 4 5.28 0.00
 25 3 5 1.49 0.00
 25 3 6 7.96 0.00
 25 3 7 1.79 0.00
 25 3 8 3.88 0.00
 25 3 9 -1.59 0.00
 25 3 10 1.84 0.00
 25 3 11 0.44 0.00
 25 5 0 3.71 0.00
 25 5 1 2.40 0.00
 25 5 2 -0.39 0.00
 25 5 3 1.45 0.00
 25 5 4 2.99 0.00
 25 5 5 6.50 0.00
 25 5 6 -2.67 0.00
 25 5 7 -2.46 0.00
 25 5 8 0.44 0.00
 25 5 9 0.38 0.00
 25 5 10 -3.07 0.00
 25 5 11 1.01 0.00
 25 7 0 -9.46 0.00
 25 7 1 -2.92 0.00
 25 7 2 1.12 0.00
 25 7 3 1.31 0.00
 25 7 4 -1.62 0.00
 25 7 5 -1.70 0.00
 25 7 6 -3.18 0.00
 25 7 7 -3.64 0.00
 25 7 8 -0.71 0.00
 25 7 9 -1.04 0.00
 25 7 10 -3.09 0.00
 25 9 0 7.27 0.00
 25 9 1 -2.37 0.00
 25 9 2 -0.89 0.00
 25 9 3 -1.78 0.00
 25 9 4 2.01 0.00
 25 9 5 1.14 0.00
 25 9 6 -0.60 0.00
 25 9 7 3.20 0.00
 25 9 8 -0.45 0.00
 25 9 9 -1.17 0.00
 25 9 10 -3.49 0.00
 25 11 0 2.05 0.00
 25 11 1 -2.81 0.00
 25 11 2 8.60 0.00
 25 11 3 0.78 0.00
 25 11 4 -0.65 0.00
 25 11 5 -2.81 0.00
 25 11 6 -0.03 0.00
 25 11 7 1.48 0.00
 25 11 8 0.12 0.00
 25 11 9 3.14 0.00
 25 13 0 3.75 0.00
 25 13 1 9.44 0.00
 25 13 2 0.74 0.00
 25 13 3 0.05 0.00
 25 13 4 -0.98 0.00
 25 13 5 -1.10 0.00
 25 13 6 -1.36 0.00
 25 13 7 0.51 0.00
 25 13 8 -3.84 0.00
 25 13 9 -3.91 0.00
 25 15 0 -0.91 0.00
 25 15 1 4.31 0.00
 25 15 2 7.49 0.00
 25 15 3 -0.41 0.00
 25 15 4 -3.07 0.00
 25 15 5 -10.41 0.00
 25 15 6 6.08 0.00
 25 15 7 -10.54 0.00
 25 15 8 6.53 0.00
 25 17 0 4.64 0.00
 25 17 1 1.54 0.00
 25 17 2 -2.54 0.00
 25 17 3 1.20 0.00
 25 17 4 -2.30 0.00
 25 17 5 1.39 0.00
 25 17 6 -2.40 0.00
 25 17 7 1.29 0.00
 25 17 8 -0.48 0.00
 25 19 0 -5.60 0.00
 25 19 1 -11.20 0.00
 25 19 2 0.01 0.00
 25 19 3 1.52 0.00
 25 19 4 -6.50 0.00
 25 19 5 -1.37 0.00
 25 19 6 -4.87 0.00
 25 19 7 -2.20 0.00
 25 19 8 -7.98 0.00
 25 21 0 -4.86 0.00
 25 21 1 -5.58 0.00
 25 21 2 -6.61 0.00
 25 21 3 -1.82 0.00
 25 21 4 -5.53 0.00
 25 21 5 3.85 0.00
 25 21 6 -5.06 0.00
 25 21 7 10.37 0.00
 25 23 0 3.31 0.00
 25 23 1 2.35 0.00
 25 23 2 4.64 0.00
 25 23 3 12.22 0.00
 25 23 4 -6.89 0.00
 25 23 5 -1.42 0.00
 25 23 6 -5.84 0.00
 25 25 0 1.49 0.00
 25 25 1 7.46 0.00
 25 25 2 4.24 0.00
 25 25 3 1.08 0.00
 25 25 4 8.15 0.00
 25 25 5 1.33 0.00
 25 27 2 -0.61 0.00
 26 0 0 6.31 0.00
 26 0 1 -11.51 0.00
 26 0 2 -0.48 0.00
 26 0 3 -7.61 0.00
 26 0 4 4.34 0.00
 26 0 5 -2.95 0.00
 26 0 6 6.72 0.00
 26 0 7 3.09 0.00
 26 0 8 3.14 0.00
 26 0 9 -3.61 0.00
 26 0 10 -3.29 0.00
 26 2 0 2.64 0.00
 26 2 1 5.23 0.00
 26 2 2 -3.20 0.00
 26 2 3 2.36 0.00
 26 2 4 -3.55 0.00
 26 2 5 -1.04 0.00
 26 2 6 3.78 0.00
 26 2 7 -0.08 0.00
 26 2 8 -3.64 0.00
 26 2 9 -1.65 0.00
 26 2 10 1.09 0.00
 26 4 0 2.36 0.00
 26 4 1 4.15 0.00
 26 4 2 -0.99 0.00
 26 4 3 5.22 0.00
 26 4 4 -8.79 0.00
 26 4 5 -1.53 0.00
 26 4 6 1.72 0.00
 26 4 7 -2.45 0.00
 26 4 8 -1.89 0.00
 26 4 9 -3.73 0.00
 26 4 10 -3.02 0.00
 26 6 0 5.16 0.00
 26 6 1 -1.29 0.00
 26 6 2 1.68 0.00
 26 6 3 -6.38 0.00
 26 6 4 -4.47 0.00
 26 6 5 -0.07 0.00
 26 6 6 3.79 0.00
 26 6 7 -0.05 0.00
 26 6 8 0.93 0.00
 26 6 9 -11.93 0.00
 26 6 10 2.74 0.00
 26 8 0 12.58 0.00
 26 8 1 1.35 0.00
 26 8 2 -0.26 0.00
 26 8 3 5.05 0.00
 26 8 4 -3.14 0.00
 26 8 5 3.01 0.00
 26 8 6 -3.33 0.00
 26 8 7 4.29 0.00
 26 8 8 4.87 0.00
 26 8 9 -0.21 0.00
 26 10 0 3.25 0.00
 26 10 1 4.79 0.00
 26 10 2 0.42 0.00
 26 10 3 2.62 0.00
 26 10 4 1.97 0.00
 26 10 5 3.29 0.00
 26 10 6 -0.65 0.00
 26 10 7 1.28 0.00
 26 10 8 -4.10 0.00
 26 12 0 7.49 0.00
 26 12 1 5.14 0.00
 26 12 2 -6.39 0.00
 26 12 3 0.56 0.00
 26 12 4 3.50 0.00
 26 12 5 -1.93 0.00
 26 12 6 -0.79 0.00
 26 12 7 1.13 0.00
 26 12 8 1.05 0.00
 26 14 0 -18.79 0.00
 26 14 1 -7.72 0.00
 26 14 2 -2.76 0.00
 26 14 3 -1.06 0.00
 26 14 4 12.63 0.00
 26 14 5 8.04 0.00
 26 14 6 18.05 0.00
 26 14 7 5.78 0.00
 26 14 8 7.27 0.00
 26 16 0 0.58 0.00
 26 16 1 -2.43 0.00
 26 16 2 -6.35 0.00
 26 16 3 4.27 0.00
 26 16 4 -2.29 0.00
 26 16 5 6.03 0.00
 26 16 6 0.12 0.00
 26 16 7 -6.40 0.00
 26 18 0 -2.85 0.00
 26 18 1 -5.22 0.00
 26 18 2 -3.93 0.00
 26 18 3 1.34 0.00
 26 18 4 -1.89 0.00
 26 18 5 10.62 0.00
 26 18 6 8.89 0.00
 26 18 7 2.29 0.00
 26 20 0 1.09 0.00
 26 20 1 -3.52 0.00
 26 20 2 -4.41 0.00
 26 20 3 4.50 0.00
 26 20 4 3.17 0.00
 26 20 5 -8.07 0.00
 26 20 6 -10.30 0.00
 26 22 0 -3.67 0.00
 26 22 1 -7.40 0.00
 26 22 2 -2.00 0.00
 26 22 3 -6.20 0.00
 26 22 4 2.79 0.00
 26 22 5 -3.37 0.00
 26 24 1 -0.31 0.00
 26 24 2 -0.60 0.00
 26 24 3 8.04 0.00
 27 1 0 0.76 0.00
 27 1 1 -0.07 0.00
 27 1 2 0.29 0.00
 27 1 3 -1.04 0.00
 27 1 4 -3.60 0.00
 27 1 5 -5.84 0.00
 27 1 6 -1.29 0.00
 27 1 7 -0.13 0.00
 27 1 8 -3.91 0.00
 27 1 9 -0.32 0.00
 27 3 0 -1.53 0.00
 27 3 1 1.18 0.00
 27 3 2 -4.56 0.00
 27 3 3 2.60 0.00
 27 3 4 -8.62 0.00
 27 3 5 -1.72 0.00
 27 3 6 0.90 0.00
 27 3 7 -1.97 0.00
 27 3 8 -4.76 0.00
 27 3 9 -5.99 0.00
 27 5 0 4.79 0.00
 27 5 1 2.19 0.00
 27 5 2 -0.14 0.00
 27 5 3 1.84 0.00
 27 5 4 1.68 0.00
 27 5 5 4.63 0.00
 27 5 6 1.76 0.00
 27 5 7 3.10 0.00
 27 5 8 3.37 0.00
 27 7 0 2.76 0.00
 27 7 1 -2.66 0.00
 27 7 2 4.75 0.00
 27 7 3 2.12 0.00
 27 7 4 1.16 0.00
 27 7 5 -1.32 0.00
 27 7 6 2.11 0.00
 27 7 7 -0.25 0.00
 27 7 8 6.61 0.00
 27 9 0 1.12 0.00
 27 9 1 5.61 0.00
 27 9 2 -2.78 0.00
 27 9 3 2.24 0.00
 27 9 4 1.56 0.00
 27 9 5 2.29 0.00
 27 9 6 3.00 0.00
 27 9 7 3.97 0.00
 27 9 8 4.97 0.00
 27 11 0 -5.98 0.00
 27 11 1 1.36 0.00
 27 11 2 0.55 0.00
 27 11 3 6.13 0.00
 27 11 4 1.20 0.00
 27 11 5 -3.60 0.00
 27 11 6 -0.47 0.00
 27 11 7 1.16 0.00
 27 13 0 -10.39 0.00
 27 13 1 3.69 0.00
 27 13 2 -3.83 0.00
 27 13 3 -6.65 0.00
 27 13 4 3.95 0.00
 27 13 5 -8.29 0.00
 27 13 6 2.33 0.00
 27 13 7 1.02 0.00
 27 15 0 -9.13 0.00
 27 15 1 -1.73 0.00
 27 15 2 -6.19 0.00
 27 15 3 -7.89 0.00
 27 15 4 -5.47 0.00
 27 15 5 -12.76 0.00
 27 15 6 -4.59 0.00
 27 17 0 -5.30 0.00
 27 17 1 2.05 0.00
 27 17 2 -4.92 0.00
 27 17 3 -0.47 0.00
 27 17 4 -4.10 0.00
 27 17 5 0.83 0.00
 27 17 6 -9.42 0.00
 27 19 0 -2.84 0.00
 27 19 1 -0.29 0.00
 27 19 2 1.23 0.00
 27 19 3 1.88 0.00
 27 19 4 3.16 0.00
 27 19 5 -7.47 0.00
 27 21 1 4.94 0.00
 27 21 2 3.24 0.00
 27 21 3 -3.11 0.00
 28 0 0 -0.01 0.00
 28 0 1 -7.34 0.00
 28 0 2 -0.66 0.00
 28 0 3 0.39 0.00
 28 0 4 11.77 0.00
 28 0 5 4.73 0.00
 28 0 6 6.25 0.00
 28 0 7 -2.64 0.00
 28 2 0 -1.49 0.00
 28 2 1 5.62 0.00
 28 2 2 -2.51 0.00
 28 2 3 5.48 0.00
 28 2 4 -0.92 0.00
 28 2 5 -5.71 0.00
 28 2 6 -2.52 0.00
 28 2 7 -2.03 0.00
 28 4 0 -5.49 0.00
 28 4 1 -7.28 0.00
 28 4 2 -1.27 0.00
 28 4 3 2.92 0.00
 28 4 4 -2.21 0.00
 28 4 5 5.46 0.00
 28 4 6 -3.06 0.00
 28 4 7 2.56 0.00
 28 6 0 -2.23 0.00
 28 6 1 -3.76 0.00
 28 6 2 6.14 0.00
 28 6 3 -5.41 0.00
 28 6 4 0.75 0.00
 28 6 5 -2.72 0.00
 28 6 6 -2.99 0.00
 28 6 7 -0.63 0.00
 28 8 0 -2.21 0.00
 28 8 1 0.72 0.00
 28 8 2 -0.90 0.00
 28 8 3 0.70 0.00
 28 8 4 1.69 0.00
 28 8 5 -2.16 0.00
 28 8 6 -1.66 0.00
 28 10 0 -2.05 0.00
 28 10 1 0.62 0.00
 28 10 2 8.70 0.00
 28 10 3 0.11 0.00
 28 10 4 5.13 0.00
 28 10 5 -0.35 0.00
 28 10 6 0.92 0.00
 28 12 0 1.87 0.00
 28 12 1 5.72 0.00
 28 12 2 -8.98 0.00
 28 12 3 -1.18 0.00
 28 12 4 -1.58 0.00
 28 12 5 -3.03 0.00
 28 12 6 -5.64 0.00
 28 14 0 -16.60 0.00
 28 14 1 1.06 0.00
 28 14 2 4.81 0.00
 28 14 3 2.96 0.00
 28 14 4 10.43 0.00
 28 14 5 7.17 0.00
 28 16 0 0.59 0.00
 28 16 1 3.81 0.00
 28 16 2 -0.74 0.00
 28 16 3 -4.50 0.00
 28 16 4 -2.31 0.00
 29 1 0 0.18 0.00
 29 1 1 -3.00 0.00
 29 1 2 -0.61 0.00
 29 1 3 1.40 0.00
 29 1 4 0.18 0.00
 29 1 5 -5.75 0.00
 29 3 0 -1.18 0.00
 29 3 1 -0.46 0.00
 29 3 2 -5.71 0.00
 29 3 3 0.62 0.00
 29 3 4 -2.49 0.00
 29 3 5 -2.55 0.00
 29 5 0 -4.09 0.00
 29 5 1 -1.82 0.00
 29 5 2 -1.40 0.00
 29 5 3 -2.30 0.00
 29 5 4 3.08 0.00
 29 5 5 0.20 0.00
 29 7 0 -0.78 0.00
 29 7 1 -4.88 0.00
 29 7 2 -1.83 0.00
 29 7 3 -1.71 0.00
 29 7 4 -1.59 0.00
 29 7 5 0.03 0.00
 29 9 0 -3.96 0.00
 29 9 1 0.71 0.00
 29 9 2 -0.74 0.00
 29 9 3 0.76 0.00
 29 9 4 1.37 0.00
 29 11 0 1.06 0.00
 29 11 1 -2.17 0.00
 29 11 2 0.17 0.00
 29 11 3 5.85 0.00
 29 11 4 -1.88 0.00
 29 13 2 7.20 0.00
 30 0 1 -5.46 0.00
 30 0 2 -6.07 0.00
 30 0 3 -2.08 0.00
 30 2 1 7.65 0.00
 30 2 2 -0.13 0.00
 30 2 3 1.84 0.00
 30 4 2 3.19 0.00
 30 0 0 3.34 0.00
 1 1 0 121.96 0.00
 0 2 0 126.56 0.00
 30 2 0 8.07 0.00
 30 4 0 8.14 0.00
 30 6 0 5.67 0.00
 30 8 0 -3.49 0.00
 30 10 0 1.90 0.00
 30 12 0 7.18 0.00
 29 13 0 2.76 0.00
 30 14 0 3.29 0.00
 29 15 0 11.29 0.00
 30 16 0 6.63 0.00
 29 17 0 5.55 0.00
 28 18 0 0.22 0.00
 30 18 0 -8.87 0.00
 29 19 0 5.90 0.00
 28 20 0 12.55 0.00
 30 20 0 -4.40 0.00
 27 21 0 -1.71 0.00
 29 21 0 -5.77 0.00
 28 22 0 2.83 0.00
 30 22 0 -2.16 0.00
 27 23 0 8.47 0.00
 29 23 0 -1.64 0.00
 26 24 0 0.81 0.00
 28 24 0 -0.16 0.00
 30 24 0 -0.75 0.00
 27 25 0 4.86 0.00
 29 25 0 -6.98 0.00
 26 26 0 -11.67 0.00
 28 26 0 -3.94 0.00
 25 27 0 -13.28 0.00
 27 27 0 -5.38 0.00
 29 27 0 -4.62 0.00
 26 28 0 -6.49 0.00
 28 28 0 1.56 0.00
 25 29 0 -3.06 0.00
 27 29 0 7.23 0.00
 24 30 0 -6.20 0.00
 26 30 0 -2.19 0.00
 28 30 0 -5.89 0.00
 23 31 0 -0.07 0.00
 25 31 0 -4.22 0.00
 27 31 0 1.80 0.00
 24 32 0 -1.42 0.00
 26 32 0 8.78 0.00
 23 33 0 -4.75 0.00
 25 33 0 -2.38 0.00
 22 34 0 1.10 0.00
 24 34 0 2.24 0.00
 26 34 0 6.57 0.00
 21 35 0 2.46 0.00
 23 35 0 -0.70 0.00
 25 35 0 6.37 0.00
 22 36 0 -0.61 0.00
 24 36 0 2.21 0.00
 21 37 0 4.11 0.00
 23 37 0 -0.83 0.00
 20 38 0 9.04 0.00
 22 38 0 2.47 0.00
 24 38 0 4.37 0.00
 19 39 0 -0.83 0.00
 21 39 0 5.79 0.00
 23 39 0 -5.53 0.00
 18 40 0 -11.30 0.00
 20 40 0 -3.75 0.00
 22 40 0 -3.92 0.00
 17 41 0 -3.73 0.00
 19 41 0 1.16 0.00
 21 41 0 5.69 0.00
 16 42 0 -0.32 0.00
 18 42 0 -2.16 0.00
 20 42 0 1.63 0.00
 11 43 0 -7.65 0.00
 15 43 0 -6.99 0.00
 17 43 0 -1.80 0.00
 19 43 0 -2.33 0.00
 10 44 0 6.30 0.00
 14 44 0 3.69 0.00
 16 44 0 -4.24 0.00
 18 44 0 -3.79 0.00
 9 45 0 4.42 0.00
 13 45 0 5.49 0.00
 15 45 0 -3.94 0.00
 17 45 0 4.55 0.00
 19 45 0 -3.65 0.00
 8 46 0 -5.27 0.00
 12 46 0 -4.60 0.00
 14 46 0 1.20 0.00
 16 46 0 -0.37 0.00
 18 46 0 3.01 0.00
 1 47 0 -0.54 0.00
 3 47 0 4.39 0.00
 5 47 0 2.22 0.00
 7 47 0 -10.44 0.00
 9 47 0 -11.72 0.00
 11 47 0 -9.39 0.00
 13 47 0 -1.71 0.00
 15 47 0 -2.32 0.00
 17 47 0 4.24 0.00
 0 48 0 11.74 0.00
 2 48 0 4.58 0.00
 4 48 0 -3.50 0.00
 6 48 0 -0.03 0.00
 8 48 0 -10.27 0.00
 10 48 0 1.88 0.00
 12 48 0 1.61 0.00
 14 48 0 6.09 0.00
 16 48 0 -0.17 0.00
 0 0 1 45.66 0.00
 2 0 1 34.64 0.00
 1 1 1 -122.30 0.00
 30 4 1 2.37 0.00
 30 6 1 8.76 0.00
 30 8 1 4.99 0.00
 30 10 1 -6.42 0.00
 30 12 1 -1.79 0.00
 29 13 1 4.83 0.00
 30 14 1 -0.09 0.00
 29 15 1 5.70 0.00
 30 16 1 -3.66 0.00
 29 17 1 -0.71 0.00
 28 18 1 0.68 0.00
 30 18 1 -5.13 0.00
 29 19 1 -1.85 0.00
 28 20 1 7.14 0.00
 30 20 1 0.06 0.00
 29 21 1 2.74 0.00
 28 22 1 4.88 0.00
 30 22 1 -4.09 0.00
 27 23 1 -1.53 0.00
 29 23 1 -8.73 0.00
 28 24 1 7.56 0.00
 30 24 1 -2.35 0.00
 27 25 1 5.47 0.00
 29 25 1 -0.79 0.00
 26 26 1 -14.82 0.00
 28 26 1 -2.20 0.00
 25 27 1 -4.14 0.00
 27 27 1 4.05 0.00
 29 27 1 1.26 0.00
 26 28 1 3.51 0.00
 28 28 1 6.61 0.00
 25 29 1 3.19 0.00
 27 29 1 9.24 0.00
 24 30 1 -5.18 0.00
 26 30 1 3.32 0.00
 28 30 1 -0.24 0.00
 25 31 1 3.53 0.00
 27 31 1 0.27 0.00
 24 32 1 1.58 0.00
 26 32 1 0.70 0.00
 23 33 1 -9.63 0.00
 25 33 1 -2.38 0.00
 22 34 1 -5.95 0.00
 24 34 1 1.99 0.00
 26 34 1 0.83 0.00
 21 35 1 10.68 0.00
 23 35 1 1.79 0.00
 25 35 1 5.18 0.00
 22 36 1 -1.23 0.00
 24 36 1 2.40 0.00
 21 37 1 -1.17 0.00
 23 37 1 -2.47 0.00
 20 38 1 -0.15 0.00
 22 38 1 1.15 0.00
 24 38 1 -3.13 0.00
 19 39 1 -4.73 0.00
 21 39 1 -5.73 0.00
 23 39 1 3.03 0.00
 18 40 1 -1.77 0.00
 20 40 1 -4.62 0.00
 22 40 1 2.82 0.00
 17 41 1 -6.40 0.00
 19 41 1 9.36 0.00
 21 41 1 3.18 0.00
 16 42 1 -0.19 0.00
 18 42 1 -3.86 0.00
 20 42 1 -2.17 0.00
 15 43 1 11.02 0.00
 17 43 1 0.43 0.00
 19 43 1 2.08 0.00
 14 44 1 -1.25 0.00
 16 44 1 5.28 0.00
 18 44 1 2.13 0.00
 13 45 1 -4.18 0.00
 15 45 1 -3.43 0.00
 17 45 1 -3.70 0.00
 19 45 1 -2.26 0.00
 12 46 1 -2.66 0.00
 14 46 1 -4.81 0.00
 16 46 1 0.68 0.00
 18 46 1 -2.21 0.00
 9 47 1 -9.96 0.00
 11 47 1 -5.53 0.00
 13 47 1 -2.51 0.00
 15 47 1 -1.54 0.00
 17 47 1 2.77 0.00
 0 48 1 -3.66 0.00
 6 48 1 -6.09 0.00
 8 48 1 -1.48 0.00
 10 48 1 -5.28 0.00
 12 48 1 4.84 0.00
 14 48 1 4.29 0.00
 16 48 1 -0.80 0.00
 30 6 2 3.28 0.00
 30 8 2 -15.09 0.00
 30 10 2 -1.83 0.00
 30 12 2 -13.91 0.00
 30 14 2 8.37 0.00
 29 15 2 1.17 0.00
 30 16 2 3.10 0.00
 29 17 2 7.33 0.00
 0 18 2 -14.04 0.00
 28 18 2 2.41 0.00
 30 18 2 -5.59 0.00
 29 19 2 2.46 0.00
 0 20 2 -6.57 0.00
 28 20 2 6.03 0.00
 30 20 2 0.05 0.00
 29 21 2 2.77 0.00
 28 22 2 0.98 0.00
 30 22 2 1.20 0.00
 27 23 2 2.49 0.00
 29 23 2 -7.46 0.00
 28 24 2 -2.72 0.00
 30 24 2 2.18 0.00
 27 25 2 6.85 0.00
 29 25 2 -0.70 0.00
 26 26 2 -5.58 0.00
 28 26 2 -1.34 0.00
 27 27 2 3.90 0.00
 29 27 2 1.19 0.00
 26 28 2 -4.14 0.00
 28 28 2 2.17 0.00
 25 29 2 -1.76 0.00
 27 29 2 4.56 0.00
 24 30 2 0.02 0.00
 26 30 2 1.80 0.00
 28 30 2 -2.13 0.00
 25 31 2 -3.63 0.00
 27 31 2 -0.26 0.00
 24 32 2 -3.34 0.00
 26 32 2 3.35 0.00
 23 33 2 -4.74 0.00
 25 33 2 -3.25 0.00
 22 34 2 -6.19 0.00
 24 34 2 -5.71 0.00
 26 34 2 -0.61 0.00
 21 35 2 -0.65 0.00
 23 35 2 0.87 0.00
 25 35 2 5.05 0.00
 22 36 2 -1.09 0.00
 24 36 2 1.76 0.00
 21 37 2 -2.96 0.00
 23 37 2 -0.33 0.00
 20 38 2 -4.05 0.00
 22 38 2 -10.40 0.00
 24 38 2 -3.71 0.00
 19 39 2 -3.56 0.00
 21 39 2 -2.27 0.00
 23 39 2 -3.98 0.00
 18 40 2 -1.23 0.00
 20 40 2 6.07 0.00
 22 40 2 2.21 0.00
 17 41 2 -0.84 0.00
 19 41 2 2.86 0.00
 21 41 2 4.07 0.00
 16 42 2 4.34 0.00
 18 42 2 0.44 0.00
 20 42 2 3.92 0.00
 15 43 2 3.12 0.00
 17 43 2 3.14 0.00
 19 43 2 3.48 0.00
 14 44 2 -1.70 0.00
 16 44 2 -1.64 0.00
 18 44 2 -2.39 0.00
 13 45 2 -6.98 0.00
 15 45 2 -1.64 0.00
 17 45 2 1.05 0.00
 12 46 2 -2.13 0.00
 14 46 2 -2.71 0.00
 16 46 2 0.56 0.00
 9 47 2 -0.75 0.00
 11 47 2 5.13 0.00
 13 47 2 -0.59 0.00
 15 47 2 4.64 0.00
 8 48 2 -0.83 0.00
 10 48 2 3.49 0.00
 12 48 2 1.22 0.00
 14 48 2 2.75 0.00
 30 4 3 0.42 0.00
 30 6 3 -0.28 0.00
 30 8 3 0.83 0.00
 30 10 3 -5.54 0.00
 30 12 3 -7.93 0.00
 29 13 3 1.99 0.00
 30 14 3 2.71 0.00
 29 15 3 3.73 0.00
 30 16 3 1.02 0.00
 29 17 3 2.78 0.00
 28 18 3 -9.21 0.00
 30 18 3 -2.62 0.00
 29 19 3 3.21 0.00
 28 20 3 1.54 0.00
 30 20 3 4.18 0.00
 29 21 3 1.23 0.00
 28 22 3 -1.11 0.00
 30 22 3 -2.31 0.00
 27 23 3 1.98 0.00
 29 23 3 -3.54 0.00
 28 24 3 5.05 0.00
 27 25 3 -6.85 0.00
 29 25 3 -2.61 0.00
 26 26 3 -13.53 0.00
 28 26 3 -8.61 0.00
 25 27 3 1.62 0.00
 27 27 3 -0.29 0.00
 26 28 3 -2.01 0.00
 28 28 3 -2.42 0.00
 25 29 3 -7.37 0.00
 27 29 3 -5.66 0.00
 24 30 3 -6.04 0.00
 26 30 3 5.55 0.00
 25 31 3 8.38 0.00
 27 31 3 3.35 0.00
 24 32 3 -1.96 0.00
 26 32 3 4.51 0.00
 23 33 3 -3.54 0.00
 25 33 3 -0.84 0.00
 22 34 3 -3.92 0.00
 24 34 3 -2.71 0.00
 21 35 3 9.14 0.00
 23 35 3 1.87 0.00
 25 35 3 7.61 0.00
 22 36 3 2.24 0.00
 24 36 3 3.56 0.00
 21 37 3 8.46 0.00
 23 37 3 -2.91 0.00
 20 38 3 2.65 0.00
 22 38 3 1.24 0.00
 19 39 3 -8.26 0.00
 21 39 3 -2.16 0.00
 23 39 3 -3.37 0.00
 18 40 3 -5.73 0.00
 20 40 3 -5.55 0.00
 22 40 3 -0.81 0.00
 17 41 3 -8.04 0.00
 19 41 3 5.09 0.00
 21 41 3 5.15 0.00
 16 42 3 1.69 0.00
 18 42 3 -0.89 0.00
 20 42 3 4.95 0.00
 15 43 3 9.36 0.00
 17 43 3 -0.63 0.00
 19 43 3 -0.56 0.00
 14 44 3 -1.76 0.00
 16 44 3 3.14 0.00
 18 44 3 -2.52 0.00
 13 45 3 -6.55 0.00
 15 45 3 -2.00 0.00
 17 45 3 -3.51 0.00
 12 46 3 -10.29 0.00
 14 46 3 -7.63 0.00
 16 46 3 -0.12 0.00
 9 47 3 -6.40 0.00
 11 47 3 -0.15 0.00
 13 47 3 0.97 0.00
 15 47 3 4.35 0.00
 0 48 3 -11.10 0.00
 6 48 3 3.83 0.00
 8 48 3 2.30 0.00
 10 48 3 -3.35 0.00
 12 48 3 3.97 0.00
 14 48 3 5.33 0.00
 30 0 4 2.91 0.00
 30 2 4 -1.67 0.00
 30 4 4 6.96 0.00
 30 6 4 0.89 0.00
 30 8 4 -6.35 0.00
 30 10 4 -1.43 0.00
 30 12 4 -5.36 0.00
 29 13 4 -0.08 0.00
 30 14 4 5.27 0.00
 29 15 4 -4.06 0.00
 30 16 4 -4.28 0.00
 29 17 4 -2.27 0.00
 28 18 4 -3.21 0.00
 30 18 4 -8.96 0.00
 29 19 4 1.39 0.00
 28 20 4 3.02 0.00
 30 20 4 4.33 0.00
 27 21 4 3.81 0.00
 29 21 4 1.71 0.00
 28 22 4 -7.33 0.00
 30 22 4 2.14 0.00
 27 23 4 -6.32 0.00
 29 23 4 -2.08 0.00
 26 24 4 11.12 0.00
 28 24 4 -2.04 0.00
 27 25 4 -0.07 0.00
 29 25 4 -1.04 0.00
 26 26 4 -5.18 0.00
 28 26 4 -4.16 0.00
 25 27 4 -3.67 0.00
 27 27 4 -2.40 0.00
 26 28 4 3.04 0.00
 28 28 4 4.29 0.00
 25 29 4 5.75 0.00
 27 29 4 7.55 0.00
 24 30 4 -1.96 0.00
 26 30 4 3.95 0.00
 23 31 4 0.37 0.00
 25 31 4 -6.39 0.00
 27 31 4 2.09 0.00
 24 32 4 0.19 0.00
 26 32 4 8.28 0.00
 23 33 4 7.29 0.00
 25 33 4 -1.38 0.00
 22 34 4 -7.67 0.00
 24 34 4 -8.78 0.00
 21 35 4 -9.51 0.00
 23 35 4 3.92 0.00
 25 35 4 -2.13 0.00
 20 36 4 16.16 0.00
 22 36 4 15.02 0.00
 24 36 4 9.70 0.00
 21 37 4 -5.10 0.00
 23 37 4 8.55 0.00
 20 38 4 -7.06 0.00
 22 38 4 -6.66 0.00
 19 39 4 0.98 0.00
 21 39 4 -2.32 0.00
 18 40 4 -4.49 0.00
 20 40 4 -1.18 0.00
 22 40 4 2.40 0.00
 17 41 4 2.45 0.00
 19 41 4 -2.24 0.00
 21 41 4 2.88 0.00
 16 42 4 2.08 0.00
 18 42 4 2.78 0.00
 20 42 4 0.10 0.00
 15 43 4 1.56 0.00
 17 43 4 0.82 0.00
 19 43 4 -4.88 0.00
 14 44 4 7.52 0.00
 16 44 4 -0.07 0.00
 18 44 4 -0.02 0.00
 11 45 4 7.80 0.00
 13 45 4 -8.66 0.00
 15 45 4 0.86 0.00
 17 45 4 -0.83 0.00
 10 46 4 -9.86 0.00
 12 46 4 -8.39 0.00
 14 46 4 -7.78 0.00
 16 46 4 -5.78 0.00
 9 47 4 0.55 0.00
 11 47 4 7.75 0.00
 13 47 4 0.59 0.00
 15 47 4 7.43 0.00
 0 48 4 -8.37 0.00
 2 48 4 -6.54 0.00
 4 48 4 3.35 0.00
 6 48 4 13.29 0.00
 8 48 4 8.97 0.00
 10 48 4 4.61 0.00
 12 48 4 4.08 0.00
 14 48 4 3.86 0.00
 30 0 5 8.10 0.00
 30 2 5 -4.62 0.00
 30 4 5 5.54 0.00
 30 6 5 -1.66 0.00
 30 8 5 3.01 0.00
 29 9 5 2.00 0.00
 30 10 5 3.79 0.00
 29 11 5 -3.98 0.00
 30 12 5 -4.41 0.00
 29 13 5 -1.57 0.00
 30 14 5 7.30 0.00
 29 15 5 1.18 0.00
 28 16 5 -8.71 0.00
 30 16 5 3.47 0.00
 29 17 5 5.17 0.00
 28 18 5 1.25 0.00
 30 18 5 11.69 0.00
 29 19 5 4.26 0.00
 28 20 5 -7.99 0.00
 30 20 5 -3.30 0.00
 27 21 5 -0.92 0.00
 29 21 5 8.97 0.00
 28 22 5 8.93 0.00
 27 23 5 -7.86 0.00
 29 23 5 -7.43 0.00
 26 24 5 5.38 0.00
 28 24 5 10.67 0.00
 27 25 5 3.54 0.00
 26 26 5 -8.84 0.00
 28 26 5 4.47 0.00
 25 27 5 -5.55 0.00
 27 27 5 -1.70 0.00
 24 28 5 9.37 0.00
 26 28 5 -3.60 0.00
 25 29 5 -6.30 0.00
 27 29 5 6.95 0.00
 24 30 5 7.84 0.00
 26 30 5 -2.20 0.00
 23 31 5 7.85 0.00
 25 31 5 -9.13 0.00
 22 32 5 -12.53 0.00
 24 32 5 -6.12 0.00
 26 32 5 -12.27 0.00
 23 33 5 -0.14 0.00
 25 33 5 -9.90 0.00
 22 34 5 -4.08 0.00
 24 34 5 6.71 0.00
 21 35 5 -5.00 0.00
 23 35 5 -2.37 0.00
 20 36 5 7.93 0.00
 22 36 5 0.46 0.00
 24 36 5 2.19 0.00
 19 37 5 2.41 0.00
 21 37 5 3.00 0.00
 23 37 5 -4.85 0.00
 18 38 5 4.15 0.00
 20 38 5 -4.26 0.00
 22 38 5 -2.04 0.00
 19 39 5 -5.49 0.00
 21 39 5 -3.91 0.00
 18 40 5 3.38 0.00
 20 40 5 -4.27 0.00
 17 41 5 4.33 0.00
 19 41 5 7.72 0.00
 16 42 5 -3.41 0.00
 18 42 5 1.44 0.00
 20 42 5 0.17 0.00
 13 43 5 -6.73 0.00
 15 43 5 -3.71 0.00
 17 43 5 -2.54 0.00
 19 43 5 -2.54 0.00
 12 44 5 -1.50 0.00
 14 44 5 -4.38 0.00
 16 44 5 -0.85 0.00
 18 44 5 1.70 0.00
 11 45 5 8.05 0.00
 13 45 5 -10.46 0.00
 15 45 5 1.15 0.00
 17 45 5 2.10 0.00
 8 46 5 -4.79 0.00
 10 46 5 5.12 0.00
 12 46 5 -2.88 0.00
 14 46 5 1.06 0.00
 16 46 5 3.27 0.00
 7 47 5 3.99 0.00
 9 47 5 0.14 0.00
 11 47 5 10.43 0.00
 13 47 5 -4.13 0.00
 15 47 5 5.92 0.00
 0 48 5 -13.60 0.00
 2 48 5 -5.40 0.00
 4 48 5 3.26 0.00
 6 48 5 3.90 0.00
 8 48 5 1.08 0.00
 10 48 5 0.49 0.00
 12 48 5 -3.17 0.00
 14 48 5 2.38 0.00
 30 0 6 3.84 0.00
 29 1 6 1.98 0.00
 30 2 6 3.04 0.00
 29 3 6 1.55 0.00
 30 4 6 9.44 0.00
 29 5 6 -3.94 0.00
 30 6 6 0.69 0.00
 29 7 6 -5.75 0.00
 30 8 6 -0.95 0.00
 29 9 6 2.15 0.00
 30 10 6 1.62 0.00
 29 11 6 -5.68 0.00
 30 12 6 -4.18 0.00
 29 13 6 -0.43 0.00
 28 14 6 12.73 0.00
 30 14 6 8.58 0.00
 29 15 6 1.34 0.00
 28 16 6 -5.20 0.00
 30 16 6 -5.87 0.00
 29 17 6 3.56 0.00
 28 18 6 11.24 0.00
 30 18 6 1.49 0.00
 27 19 6 1.24 0.00
 29 19 6 5.28 0.00
 28 20 6 -2.94 0.00
 27 21 6 8.58 0.00
 29 21 6 6.19 0.00
 26 22 6 5.37 0.00
 28 22 6 5.31 0.00
 27 23 6 -3.97 0.00
 29 23 6 -5.40 0.00
 26 24 6 -4.21 0.00
 28 24 6 -7.00 0.00
 25 25 6 3.25 0.00
 27 25 6 1.80 0.00
 26 26 6 2.79 0.00
 28 26 6 2.37 0.00
 25 27 6 -7.86 0.00
 27 27 6 -9.08 0.00
 24 28 6 -10.02 0.00
 26 28 6 -8.02 0.00
 23 29 6 -4.20 0.00
 25 29 6 2.85 0.00
 27 29 6 4.29 0.00
 24 30 6 1.27 0.00
 26 30 6 8.13 0.00
 23 31 6 -0.86 0.00
 25 31 6 -2.58 0.00
 22 32 6 -6.07 0.00
 24 32 6 -7.42 0.00
 21 33 6 0.34 0.00
 23 33 6 0.27 0.00
 25 33 6 -2.56 0.00
 22 34 6 5.69 0.00
 24 34 6 9.02 0.00
 21 35 6 -1.81 0.00
 23 35 6 7.40 0.00
 20 36 6 4.80 0.00
 22 36 6 -2.12 0.00
 19 37 6 5.44 0.00
 21 37 6 -6.17 0.00
 23 37 6 1.66 0.00
 18 38 6 -5.36 0.00
 20 38 6 2.90 0.00
 22 38 6 -1.74 0.00
 17 39 6 -1.14 0.00
 19 39 6 2.32 0.00
 21 39 6 -1.80 0.00
 16 40 6 0.63 0.00
 18 40 6 -3.69 0.00
 20 40 6 3.33 0.00
 15 41 6 -2.42 0.00
 17 41 6 3.22 0.00
 19 41 6 -0.67 0.00
 14 42 6 0.21 0.00
 16 42 6 4.80 0.00
 18 42 6 0.59 0.00
 13 43 6 6.51 0.00
 15 43 6 10.20 0.00
 17 43 6 6.50 0.00
 10 44 6 -2.24 0.00
 12 44 6 5.60 0.00
 14 44 6 1.91 0.00
 16 44 6 0.40 0.00
 9 45 6 -10.25 0.00
 11 45 6 -8.82 0.00
 13 45 6 -20.66 0.00
 15 45 6 -2.71 0.00
 8 46 6 -6.71 0.00
 10 46 6 -6.04 0.00
 12 46 6 -0.94 0.00
 14 46 6 -1.28 0.00
 1 47 6 -10.53 0.00
 3 47 6 -9.07 0.00
 5 47 6 -2.25 0.00
 7 47 6 -4.79 0.00
 9 47 6 2.21 0.00
 11 47 6 6.75 0.00
 13 47 6 -0.45 0.00
 0 48 6 -4.40 0.00
 2 48 6 -1.11 0.00
 4 48 6 4.42 0.00
 6 48 6 8.85 0.00
 8 48 6 4.68 0.00
 10 48 6 3.03 0.00
 12 48 6 1.14 0.00
 30 0 7 -2.25 0.00
 29 1 7 0.59 0.00
 30 2 7 1.82 0.00
 29 3 7 -1.49 0.00
 30 4 7 1.73 0.00
 29 5 7 1.93 0.00
 30 6 7 1.24 0.00
 29 7 7 0.49 0.00
 28 8 7 -4.14 0.00
 30 8 7 4.88 0.00
 29 9 7 1.30 0.00
 28 10 7 -7.24 0.00
 30 10 7 8.06 0.00
 29 11 7 -1.02 0.00
 28 12 7 -6.41 0.00
 30 12 7 -1.86 0.00
 29 13 7 5.27 0.00
 28 14 7 2.26 0.00
 30 14 7 0.04 0.00
 27 15 7 -9.79 0.00
 29 15 7 -4.00 0.00
 28 16 7 -10.16 0.00
 30 16 7 -3.32 0.00
 27 17 7 2.93 0.00
 29 17 7 -0.26 0.00
 28 18 7 -0.60 0.00
 27 19 7 -6.92 0.00
 29 19 7 1.03 0.00
 26 20 7 2.60 0.00
 28 20 7 0.74 0.00
 27 21 7 -0.20 0.00
 29 21 7 7.03 0.00
 26 22 7 -4.64 0.00
 28 22 7 -0.71 0.00
 25 23 7 17.13 0.00
 27 23 7 1.72 0.00
 26 24 7 1.93 0.00
 28 24 7 2.60 0.00
 25 25 7 9.38 0.00
 27 25 7 -5.75 0.00
 24 26 7 -3.20 0.00
 26 26 7 -6.37 0.00
 25 27 7 10.03 0.00
 27 27 7 -6.96 0.00
 24 28 7 7.23 0.00
 26 28 7 0.44 0.00
 23 29 7 -9.00 0.00
 25 29 7 5.58 0.00
 22 30 7 1.80 0.00
 24 30 7 11.81 0.00
 26 30 7 2.47 0.00
 23 31 7 3.21 0.00
 25 31 7 3.67 0.00
 22 32 7 -6.03 0.00
 24 32 7 -2.57 0.00
 21 33 7 -1.77 0.00
 23 33 7 -0.14 0.00
 20 34 7 -1.85 0.00
 22 34 7 -1.17 0.00
 24 34 7 0.98 0.00
 19 35 7 -3.28 0.00
 21 35 7 -0.17 0.00
 23 35 7 -0.28 0.00
 18 36 7 -1.25 0.00
 20 36 7 0.37 0.00
 22 36 7 5.05 0.00
 17 37 7 16.15 0.00
 19 37 7 6.67 0.00
 21 37 7 6.84 0.00
 16 38 7 -3.93 0.00
 18 38 7 5.10 0.00
 20 38 7 -8.09 0.00
 15 39 7 -5.76 0.00
 17 39 7 -7.57 0.00
 19 39 7 -15.16 0.00
 21 39 7 -8.49 0.00
 14 40 7 1.82 0.00
 16 40 7 -8.52 0.00
 18 40 7 6.12 0.00
 20 40 7 -6.77 0.00
 13 41 7 6.16 0.00
 15 41 7 2.18 0.00
 17 41 7 5.42 0.00
 19 41 7 4.37 0.00
 12 42 7 0.23 0.00
 14 42 7 8.26 0.00
 16 42 7 -4.15 0.00
 18 42 7 4.51 0.00
 11 43 7 4.18 0.00
 13 43 7 0.43 0.00
 15 43 7 -1.16 0.00
 17 43 7 -1.04 0.00
 10 44 7 6.12 0.00
 12 44 7 -4.56 0.00
 14 44 7 -2.19 0.00
 16 44 7 -6.89 0.00
 7 45 7 0.31 0.00
 9 45 7 -7.72 0.00
 11 45 7 3.13 0.00
 13 45 7 -6.89 0.00
 15 45 7 -0.10 0.00
 0 46 7 -4.01 0.00
 2 46 7 -2.98 0.00
 4 46 7 -2.46 0.00
 6 46 7 2.53 0.00
 8 46 7 -5.96 0.00
 10 46 7 11.52 0.00
 12 46 7 -1.32 0.00
 14 46 7 4.21 0.00
 1 47 7 -7.82 0.00
 3 47 7 -10.28 0.00
 5 47 7 -1.90 0.00
 7 47 7 2.85 0.00
 9 47 7 -2.23 0.00
 11 47 7 3.05 0.00
 13 47 7 -4.62 0.00
 0 48 7 1.40 0.00
 2 48 7 4.83 0.00
 4 48 7 6.34 0.00
 6 48 7 6.00 0.00
 8 48 7 -5.64 0.00
 10 48 7 3.46 0.00
 12 48 7 -2.41 0.00
 28 0 8 1.89 0.00
 30 0 8 -8.62 0.00
 29 1 8 0.62 0.00
 28 2 8 0.59 0.00
 30 2 8 0.11 0.00
 29 3 8 -3.22 0.00
 28 4 8 -3.89 0.00
 30 4 8 1.12 0.00
 29 5 8 -3.21 0.00
 28 6 8 -5.51 0.00
 30 6 8 -4.33 0.00
 29 7 8 -1.76 0.00
 28 8 8 3.71 0.00
 30 8 8 3.62 0.00
 29 9 8 -0.57 0.00
 28 10 8 -3.85 0.00
 30 10 8 3.33 0.00
 27 11 8 8.14 0.00
 29 11 8 -2.67 0.00
 28 12 8 -4.94 0.00
 30 12 8 1.38 0.00
 27 13 8 7.04 0.00
 29 13 8 -3.83 0.00
 28 14 8 -4.36 0.00
 30 14 8 3.59 0.00
 27 15 8 3.91 0.00
 29 15 8 5.01 0.00
 26 16 8 2.59 0.00
 28 16 8 -12.44 0.00
 27 17 8 -5.64 0.00
 29 17 8 2.88 0.00
 26 18 8 1.50 0.00
 28 18 8 -2.49 0.00
 27 19 8 -0.68 0.00
 29 19 8 3.01 0.00
 26 20 8 -5.60 0.00
 28 20 8 1.23 0.00
 25 21 8 -4.89 0.00
 27 21 8 3.59 0.00
 26 22 8 -10.44 0.00
 28 22 8 0.96 0.00
 25 23 8 3.25 0.00
 27 23 8 5.89 0.00
 24 24 8 8.08 0.00
 26 24 8 -5.74 0.00
 23 25 8 8.34 0.00
 25 25 8 4.37 0.00
 27 25 8 5.33 0.00
 24 26 8 3.71 0.00
 26 26 8 -6.86 0.00
 23 27 8 10.02 0.00
 25 27 8 0.57 0.00
 22 28 8 4.80 0.00
 24 28 8 -0.14 0.00
 26 28 8 0.69 0.00
 23 29 8 -1.33 0.00
 25 29 8 -2.87 0.00
 22 30 8 7.77 0.00
 24 30 8 -3.86 0.00
 21 31 8 3.38 0.00
 23 31 8 -1.01 0.00
 20 32 8 -6.19 0.00
 22 32 8 -4.63 0.00
 24 32 8 -7.30 0.00
 19 33 8 -7.85 0.00
 21 33 8 0.68 0.00
 23 33 8 -2.58 0.00
 18 34 8 0.92 0.00
 20 34 8 1.42 0.00
 22 34 8 -3.28 0.00
 19 35 8 3.07 0.00
 21 35 8 4.29 0.00
 18 36 8 -5.37 0.00
 20 36 8 2.65 0.00
 22 36 8 -0.87 0.00
 17 37 8 -2.89 0.00
 19 37 8 2.79 0.00
 21 37 8 -3.42 0.00
 16 38 8 -2.03 0.00
 18 38 8 1.23 0.00
 20 38 8 4.85 0.00
 15 39 8 -7.34 0.00
 17 39 8 -1.92 0.00
 19 39 8 4.33 0.00
 14 40 8 -11.39 0.00
 16 40 8 -4.83 0.00
 18 40 8 -2.26 0.00
 11 41 8 3.33 0.00
 13 41 8 6.92 0.00
 15 41 8 -2.20 0.00
 17 41 8 1.58 0.00
 10 42 8 11.44 0.00
 12 42 8 9.58 0.00
 14 42 8 2.26 0.00
 16 42 8 8.66 0.00
 9 43 8 4.17 0.00
 11 43 8 2.18 0.00
 13 43 8 2.67 0.00
 15 43 8 1.47 0.00
 8 44 8 -2.67 0.00
 10 44 8 -1.42 0.00
 12 44 8 -0.32 0.00
 14 44 8 -4.08 0.00
 1 45 8 10.01 0.00
 3 45 8 2.67 0.00
 5 45 8 1.39 0.00
 7 45 8 -8.23 0.00
 9 45 8 -0.60 0.00
 11 45 8 -4.77 0.00
 13 45 8 -7.83 0.00
 0 46 8 0.20 0.00
 2 46 8 6.29 0.00
 4 46 8 -5.99 0.00
 6 46 8 1.43 0.00
 8 46 8 -5.27 0.00
 10 46 8 2.28 0.00
 12 46 8 -0.60 0.00
 1 47 8 -2.61 0.00
 3 47 8 -3.63 0.00
 5 47 8 4.26 0.00
 7 47 8 -3.84 0.00
 9 47 8 6.44 0.00
 11 47 8 3.01 0.00
 0 48 8 1.48 0.00
 2 48 8 5.82 0.00
 4 48 8 2.13 0.00
 6 48 8 4.67 0.00
 8 48 8 -1.44 0.00
 10 48 8 4.43 0.00
 28 0 9 4.69 0.00
 30 0 9 -2.72 0.00
 29 1 9 2.58 0.00
 28 2 9 7.30 0.00
 30 2 9 -1.72 0.00
 29 3 9 1.94 0.00
 28 4 9 12.44 0.00
 30 4 9 -0.56 0.00
 27 5 9 -2.86 0.00
 29 5 9 1.12 0.00
 28 6 9 0.11 0.00
 30 6 9 -11.25 0.00
 27 7 9 -0.75 0.00
 29 7 9 3.99 0.00
 28 8 9 8.41 0.00
 30 8 9 -0.41 0.00
 27 9 9 -6.01 0.00
 29 9 9 -3.42 0.00
 26 10 9 -8.76 0.00
 28 10 9 -4.99 0.00
 30 10 9 -0.97 0.00
 27 11 9 2.35 0.00
 29 11 9 3.07 0.00
 26 12 9 6.36 0.00
 28 12 9 0.42 0.00
 27 13 9 -3.33 0.00
 29 13 9 4.04 0.00
 26 14 9 6.79 0.00
 28 14 9 3.66 0.00
 25 15 9 3.93 0.00
 27 15 9 9.40 0.00
 29 15 9 11.77 0.00
 26 16 9 -2.89 0.00
 28 16 9 -1.78 0.00
 25 17 9 -1.83 0.00
 27 17 9 2.42 0.00
 26 18 9 0.31 0.00
 28 18 9 7.20 0.00
 25 19 9 -5.07 0.00
 27 19 9 3.67 0.00
 24 20 9 -0.51 0.00
 26 20 9 -1.82 0.00
 28 20 9 -1.07 0.00
 25 21 9 -7.63 0.00
 27 21 9 -1.21 0.00
 24 22 9 -14.48 0.00
 26 22 9 -3.68 0.00
 23 23 9 0.35 0.00
 25 23 9 3.26 0.00
 27 23 9 7.66 0.00
 24 24 9 -2.65 0.00
 26 24 9 5.35 0.00
 23 25 9 -8.26 0.00
 25 25 9 0.35 0.00
 22 26 9 3.05 0.00
 24 26 9 -9.08 0.00
 26 26 9 -2.35 0.00
 21 27 9 7.26 0.00
 23 27 9 0.52 0.00
 25 27 9 9.71 0.00
 22 28 9 2.41 0.00
 24 28 9 1.35 0.00
 21 29 9 5.77 0.00
 23 29 9 -10.26 0.00
 25 29 9 1.80 0.00
 20 30 9 3.64 0.00
 22 30 9 0.81 0.00
 24 30 9 4.28 0.00
 19 31 9 -2.48 0.00
 21 31 9 4.88 0.00
 23 31 9 -1.38 0.00
 18 32 9 -4.23 0.00
 20 32 9 4.69 0.00
 22 32 9 -5.13 0.00
 19 33 9 -4.79 0.00
 21 33 9 -4.30 0.00
 23 33 9 1.33 0.00
 18 34 9 -5.47 0.00
 20 34 9 6.30 0.00
 22 34 9 -3.05 0.00
 17 35 9 0.03 0.00
 19 35 9 6.54 0.00
 21 35 9 1.76 0.00
 16 36 9 6.53 0.00
 18 36 9 -4.22 0.00
 20 36 9 8.13 0.00
 15 37 9 6.78 0.00
 17 37 9 1.09 0.00
 19 37 9 -0.34 0.00
 14 38 9 -3.39 0.00
 16 38 9 -7.14 0.00
 18 38 9 -2.28 0.00
 13 39 9 -5.16 0.00
 15 39 9 6.63 0.00
 17 39 9 -3.48 0.00
 19 39 9 -5.79 0.00
 12 40 9 -1.42 0.00
 14 40 9 0.29 0.00
 16 40 9 -0.67 0.00
 18 40 9 7.55 0.00
 11 41 9 7.97 0.00
 13 41 9 5.35 0.00
 15 41 9 7.40 0.00
 17 41 9 2.08 0.00
 8 42 9 11.90 0.00
 10 42 9 2.27 0.00
 12 42 9 3.70 0.00
 14 42 9 3.18 0.00
 16 42 9 0.55 0.00
 7 43 9 -4.03 0.00
 9 43 9 -13.56 0.00
 11 43 9 -6.68 0.00
 13 43 9 -6.59 0.00
 15 43 9 -4.03 0.00
 0 44 9 8.53 0.00
 2 44 9 7.33 0.00
 4 44 9 2.51 0.00
 6 44 9 -4.65 0.00
 8 44 9 -4.46 0.00
 10 44 9 -4.43 0.00
 12 44 9 -5.42 0.00
 14 44 9 -5.22 0.00
 1 45 9 5.89 0.00
 3 45 9 4.02 0.00
 5 45 9 2.77 0.00
 7 45 9 5.85 0.00
 9 45 9 0.66 0.00
 11 45 9 4.84 0.00
 13 45 9 -0.09 0.00
 0 46 9 -7.77 0.00
 2 46 9 -5.22 0.00
 4 46 9 -0.40 0.00
 6 46 9 4.76 0.00
 8 46 9 0.06 0.00
 10 46 9 3.65 0.00
 1 47 9 0.71 0.00
 3 47 9 -5.21 0.00
 5 47 9 -1.81 0.00
 7 47 9 -0.50 0.00
 9 47 9 -1.69 0.00
 0 48 9 -4.37 0.00
 2 48 9 -0.77 0.00
 4 48 9 -1.29 0.00
 6 48 9 -0.83 0.00
 8 48 9 -2.88 0.00
 28 0 10 9.58 0.00
 30 0 10 -13.55 0.00
 27 1 10 1.51 0.00
 29 1 10 -2.53 0.00
 28 2 10 14.17 0.00
 30 2 10 -4.93 0.00
 27 3 10 2.68 0.00
 29 3 10 -1.17 0.00
 28 4 10 4.06 0.00
 27 5 10 2.53 0.00
 29 5 10 -6.83 0.00
 28 6 10 6.22 0.00
 27 7 10 2.84 0.00
 29 7 10 -2.24 0.00
 26 8 10 -0.29 0.00
 28 8 10 1.21 0.00
 27 9 10 1.90 0.00
 29 9 10 2.41 0.00
 26 10 10 -7.64 0.00
 28 10 10 -2.05 0.00
 25 11 10 -7.67 0.00
 27 11 10 -2.00 0.00
 29 11 10 -4.56 0.00
 26 12 10 -2.48 0.00
 28 12 10 0.63 0.00
 25 13 10 -5.13 0.00
 27 13 10 4.43 0.00
 26 14 10 2.13 0.00
 28 14 10 0.62 0.00
 25 15 10 -3.99 0.00
 27 15 10 -6.04 0.00
 24 16 10 -0.21 0.00
 26 16 10 -3.10 0.00
 28 16 10 -10.41 0.00
 25 17 10 0.55 0.00
 27 17 10 -4.07 0.00
 24 18 10 3.13 0.00
 26 18 10 7.02 0.00
 23 19 10 -0.61 0.00
 25 19 10 -0.99 0.00
 27 19 10 0.10 0.00
 24 20 10 0.00 0.00
 26 20 10 5.29 0.00
 23 21 10 -6.32 0.00
 25 21 10 7.87 0.00
 27 21 10 3.62 0.00
 22 22 10 -1.24 0.00
 24 22 10 -0.18 0.00
 26 22 10 4.53 0.00
 23 23 10 -7.44 0.00
 25 23 10 8.67 0.00
 22 24 10 -4.65 0.00
 24 24 10 3.03 0.00
 26 24 10 0.67 0.00
 21 25 10 -1.35 0.00
 23 25 10 -11.75 0.00
 25 25 10 -0.40 0.00
 20 26 10 5.34 0.00
 22 26 10 -1.37 0.00
 24 26 10 4.67 0.00
 21 27 10 -9.23 0.00
 23 27 10 -3.97 0.00
 20 28 10 -1.45 0.00
 22 28 10 -4.63 0.00
 24 28 10 -4.25 0.00
 19 29 10 13.30 0.00
 21 29 10 0.55 0.00
 23 29 10 8.65 0.00
 18 30 10 1.35 0.00
 20 30 10 7.07 0.00
 22 30 10 3.75 0.00
 17 31 10 4.02 0.00
 19 31 10 0.72 0.00
 21 31 10 -1.35 0.00
 23 31 10 2.19 0.00
 16 32 10 -1.23 0.00
 18 32 10 -6.44 0.00
 20 32 10 -3.79 0.00
 22 32 10 -2.83 0.00
 15 33 10 -4.20 0.00
 17 33 10 -2.28 0.00
 19 33 10 -12.74 0.00
 21 33 10 -5.29 0.00
 14 34 10 11.57 0.00
 16 34 10 10.00 0.00
 18 34 10 8.04 0.00
 20 34 10 3.19 0.00
 15 35 10 5.29 0.00
 17 35 10 3.43 0.00
 19 35 10 -1.54 0.00
 14 36 10 14.48 0.00
 16 36 10 -2.49 0.00
 18 36 10 2.37 0.00
 20 36 10 -0.88 0.00
 13 37 10 0.59 0.00
 15 37 10 7.50 0.00
 17 37 10 1.85 0.00
 19 37 10 3.66 0.00
 12 38 10 -2.18 0.00
 14 38 10 10.66 0.00
 16 38 10 -5.71 0.00
 18 38 10 -0.02 0.00
 11 39 10 -3.03 0.00
 13 39 10 -4.26 0.00
 15 39 10 -3.63 0.00
 17 39 10 -3.21 0.00
 10 40 10 1.44 0.00
 12 40 10 -13.09 0.00
 14 40 10 -6.87 0.00
 16 40 10 -2.61 0.00
 9 41 10 -5.67 0.00
 11 41 10 2.92 0.00
 13 41 10 7.02 0.00
 15 41 10 1.08 0.00
 6 42 10 -4.82 0.00
 8 42 10 1.21 0.00
 10 42 10 6.84 0.00
 12 42 10 3.86 0.00
 14 42 10 0.46 0.00
 1 43 10 -6.14 0.00
 3 43 10 -0.51 0.00
 5 43 10 2.21 0.00
 7 43 10 8.23 0.00
 9 43 10 3.78 0.00
 11 43 10 1.18 0.00
 13 43 10 -0.75 0.00
 0 44 10 -3.70 0.00
 2 44 10 7.54 0.00
 4 44 10 2.84 0.00
 6 44 10 8.16 0.00
 8 44 10 3.46 0.00
 10 44 10 -3.53 0.00
 12 44 10 -0.96 0.00
 1 45 10 5.32 0.00
 3 45 10 0.75 0.00
 5 45 10 -6.32 0.00
 7 45 10 -7.24 0.00
 9 45 10 -4.27 0.00
 11 45 10 -2.70 0.00
 0 46 10 -11.54 0.00
 2 46 10 -3.70 0.00
 4 46 10 -8.44 0.00
 6 46 10 -1.41 0.00
 8 46 10 -1.51 0.00
 1 47 10 -2.04 0.00
 3 47 10 1.77 0.00
 5 47 10 3.33 0.00
 7 47 10 2.64 0.00
 0 48 10 -3.65 0.00
 2 48 10 0.90 0.00
 4 48 10 1.11 0.00
 18 0 11 -11.58 0.00
 26 0 11 1.07 0.00
 28 0 11 -2.57 0.00
 17 1 11 -7.74 0.00
 27 1 11 4.80 0.00
 29 1 11 -9.62 0.00
 26 2 11 -2.76 0.00
 28 2 11 -3.66 0.00
 27 3 11 0.56 0.00
 29 3 11 -2.90 0.00
 26 4 11 -0.70 0.00
 28 4 11 -0.59 0.00
 27 5 11 -2.21 0.00
 29 5 11 -4.12 0.00
 26 6 11 1.62 0.00
 28 6 11 3.50 0.00
 25 7 11 4.06 0.00
 27 7 11 0.39 0.00
 26 8 11 2.36 0.00
 28 8 11 2.88 0.00
 25 9 11 4.82 0.00
 27 9 11 2.90 0.00
 26 10 11 -0.32 0.00
 28 10 11 -1.11 0.00
 25 11 11 2.79 0.00
 27 11 11 0.25 0.00
 24 12 11 -2.24 0.00
 26 12 11 3.84 0.00
 28 12 11 -3.30 0.00
 25 13 11 -1.13 0.00
 27 13 11 -1.82 0.00
 24 14 11 7.38 0.00
 26 14 11 11.21 0.00
 25 15 11 -5.00 0.00
 27 15 11 -6.93 0.00
 24 16 11 2.73 0.00
 26 16 11 -3.92 0.00
 23 17 11 0.24 0.00
 25 17 11 5.08 0.00
 27 17 11 0.15 0.00
 24 18 11 3.88 0.00
 26 18 11 0.08 0.00
 23 19 11 -1.89 0.00
 25 19 11 -2.35 0.00
 22 20 11 -1.08 0.00
 24 20 11 2.51 0.00
 26 20 11 -2.57 0.00
 21 21 11 3.58 0.00
 23 21 11 1.28 0.00
 25 21 11 -3.78 0.00
 22 22 11 0.57 0.00
 24 22 11 0.90 0.00
 21 23 11 0.27 0.00
 23 23 11 3.84 0.00
 25 23 11 0.20 0.00
 20 24 11 -5.30 0.00
 22 24 11 1.34 0.00
 24 24 11 2.08 0.00
 19 25 11 5.54 0.00
 21 25 11 -3.88 0.00
 23 25 11 3.40 0.00
 20 26 11 -8.94 0.00
 22 26 11 5.27 0.00
 24 26 11 5.33 0.00
 19 27 11 -5.05 0.00
 21 27 11 -3.82 0.00
 23 27 11 2.75 0.00
 18 28 11 5.66 0.00
 20 28 11 -4.54 0.00
 22 28 11 2.76 0.00
 17 29 11 5.62 0.00
 19 29 11 -1.47 0.00
 21 29 11 4.46 0.00
 23 29 11 0.41 0.00
 16 30 11 -4.10 0.00
 18 30 11 -3.28 0.00
 20 30 11 -6.73 0.00
 22 30 11 -2.32 0.00
 15 31 11 -0.12 0.00
 17 31 11 3.18 0.00
 19 31 11 -1.93 0.00
 21 31 11 1.58 0.00
 14 32 11 -3.22 0.00
 16 32 11 -5.51 0.00
 18 32 11 -0.31 0.00
 20 32 11 1.98 0.00
 13 33 11 12.38 0.00
 15 33 11 -7.64 0.00
 17 33 11 -3.03 0.00
 19 33 11 -2.57 0.00
 14 34 11 3.19 0.00
 16 34 11 2.76 0.00
 18 34 11 2.72 0.00
 20 34 11 7.79 0.00
 13 35 11 1.87 0.00
 15 35 11 -12.58 0.00
 17 35 11 2.17 0.00
 19 35 11 5.30 0.00
 12 36 11 -2.05 0.00
 14 36 11 9.68 0.00
 16 36 11 -4.25 0.00
 18 36 11 -7.36 0.00
 11 37 11 -2.09 0.00
 13 37 11 -4.90 0.00
 15 37 11 -8.13 0.00
 17 37 11 -2.34 0.00
 10 38 11 2.34 0.00
 12 38 11 -2.61 0.00
 14 38 11 -3.49 0.00
 16 38 11 -13.66 0.00
 9 39 11 -11.55 0.00
 11 39 11 -8.09 0.00
 13 39 11 -4.58 0.00
 15 39 11 3.10 0.00
 6 40 11 -3.84 0.00
 8 40 11 -4.20 0.00
 10 40 11 -5.10 0.00
 12 40 11 3.42 0.00
 14 40 11 4.36 0.00
 1 41 11 -3.55 0.00
 3 41 11 -1.36 0.00
 5 41 11 6.19 0.00
 7 41 11 8.57 0.00
 9 41 11 5.30 0.00
 11 41 11 11.24 0.00
 13 41 11 3.71 0.00
 0 42 11 -1.05 0.00
 2 42 11 2.19 0.00
 4 42 11 3.13 0.00
 6 42 11 3.88 0.00
 8 42 11 10.89 0.00
 10 42 11 1.97 0.00
 12 42 11 3.39 0.00
 1 43 11 2.80 0.00
 3 43 11 3.23 0.00
 5 43 11 3.72 0.00
 7 43 11 1.09 0.00
 9 43 11 -3.96 0.00
 11 43 11 2.38 0.00
 0 44 11 -0.84 0.00
 2 44 11 3.28 0.00
 4 44 11 -3.46 0.00
 6 44 11 -8.14 0.00
 8 44 11 -4.55 0.00
 10 44 11 -4.62 0.00
 1 45 11 -4.32 0.00
 3 45 11 -8.78 0.00
 5 45 11 -4.99 0.00
 7 45 11 -1.65 0.00
 9 45 11 -1.52 0.00
 0 46 11 -8.10 0.00
 2 46 11 0.15 0.00
 4 46 11 -0.08 0.00
 6 46 11 2.87 0.00
 1 47 11 9.65 0.00
 3 47 11 0.94 0.00
 26 0 12 -1.48 0.00
 28 0 12 0.65 0.00
 25 1 12 5.02 0.00
 27 1 12 -1.01 0.00
 26 2 12 -0.60 0.00
 28 2 12 3.65 0.00
 25 3 12 7.60 0.00
 27 3 12 -0.13 0.00
 26 4 12 -8.61 0.00
 28 4 12 -9.17 0.00
 25 5 12 3.09 0.00
 27 5 12 -0.99 0.00
 24 6 12 -1.57 0.00
 26 6 12 3.33 0.00
 28 6 12 1.93 0.00
 25 7 12 0.81 0.00
 27 7 12 -3.78 0.00
 24 8 12 -1.82 0.00
 26 8 12 -3.60 0.00
 25 9 12 1.26 0.00
 27 9 12 0.82 0.00
 24 10 12 6.01 0.00
 26 10 12 -2.15 0.00
 25 11 12 -3.88 0.00
 27 11 12 -0.46 0.00
 24 12 12 -0.19 0.00
 26 12 12 -5.10 0.00
 23 13 12 2.23 0.00
 25 13 12 -1.22 0.00
 27 13 12 7.94 0.00
 24 14 12 4.47 0.00
 26 14 12 6.00 0.00
 23 15 12 2.49 0.00
 25 15 12 -5.13 0.00
 22 16 12 5.25 0.00
 24 16 12 6.17 0.00
 26 16 12 4.78 0.00
 23 17 12 6.90 0.00
 25 17 12 -3.73 0.00
 22 18 12 -6.27 0.00
 24 18 12 -5.71 0.00
 21 19 12 6.92 0.00
 23 19 12 1.29 0.00
 25 19 12 -1.09 0.00
 22 20 12 0.25 0.00
 24 20 12 -2.84 0.00
 21 21 12 10.57 0.00
 23 21 12 -9.79 0.00
 25 21 12 -1.23 0.00
 20 22 12 3.05 0.00
 22 22 12 -0.18 0.00
 24 22 12 -1.34 0.00
 19 23 12 -12.99 0.00
 21 23 12 10.14 0.00
 23 23 12 -8.67 0.00
 20 24 12 -0.88 0.00
 22 24 12 -4.48 0.00
 24 24 12 0.37 0.00
 19 25 12 -0.59 0.00
 21 25 12 8.20 0.00
 23 25 12 -4.77 0.00
 18 26 12 -13.57 0.00
 20 26 12 -8.08 0.00
 22 26 12 -6.79 0.00
 17 27 12 -1.49 0.00
 19 27 12 4.68 0.00
 21 27 12 1.75 0.00
 16 28 12 4.22 0.00
 18 28 12 0.29 0.00
 20 28 12 9.07 0.00
 22 28 12 3.27 0.00
 15 29 12 2.09 0.00
 17 29 12 -0.12 0.00
 19 29 12 4.06 0.00
 21 29 12 -1.16 0.00
 16 30 12 4.64 0.00
 18 30 12 -2.31 0.00
 20 30 12 4.96 0.00
 15 31 12 -4.03 0.00
 17 31 12 -0.91 0.00
 19 31 12 -0.80 0.00
 14 32 12 -10.45 0.00
 16 32 12 -1.32 0.00
 18 32 12 -7.57 0.00
 20 32 12 2.32 0.00
 13 33 12 0.56 0.00
 15 33 12 -2.30 0.00
 17 33 12 3.47 0.00
 19 33 12 -1.48 0.00
 12 34 12 -0.75 0.00
 14 34 12 4.52 0.00
 16 34 12 8.11 0.00
 18 34 12 0.37 0.00
 11 35 12 4.10 0.00
 13 35 12 3.82 0.00
 15 35 12 4.17 0.00
 17 35 12 2.85 0.00
 10 36 12 -4.03 0.00
 12 36 12 -5.16 0.00
 14 36 12 0.38 0.00
 16 36 12 -1.17 0.00
 9 37 12 3.86 0.00
 11 37 12 -2.30 0.00
 13 37 12 -2.88 0.00
 15 37 12 1.12 0.00
 8 38 12 1.12 0.00
 10 38 12 3.21 0.00
 12 38 12 4.73 0.00
 14 38 12 6.41 0.00
 5 39 12 0.92 0.00
 7 39 12 -6.89 0.00
 9 39 12 -1.58 0.00
 11 39 12 -3.31 0.00
 13 39 12 -1.56 0.00
 0 40 12 0.52 0.00
 2 40 12 -9.52 0.00
 4 40 12 4.44 0.00
 6 40 12 -3.99 0.00
 8 40 12 5.81 0.00
 10 40 12 5.58 0.00
 12 40 12 2.37 0.00
 1 41 12 2.73 0.00
 3 41 12 -2.43 0.00
 5 41 12 5.81 0.00
 7 41 12 -1.16 0.00
 9 41 12 0.77 0.00
 11 41 12 4.67 0.00
 0 42 12 10.90 0.00
 2 42 12 -0.45 0.00
 4 42 12 2.49 0.00
 6 42 12 -13.53 0.00
 8 42 12 -5.22 0.00
 10 42 12 -3.39 0.00
 1 43 12 1.12 0.00
 3 43 12 -0.58 0.00
 5 43 12 4.99 0.00
 7 43 12 4.69 0.00
 9 43 12 2.46 0.00
 0 44 12 1.07 0.00
 2 44 12 -0.83 0.00
 4 44 12 4.42 0.00
 6 44 12 -0.05 0.00
 1 45 12 1.52 0.00
 3 45 12 -2.38 0.00
 5 45 12 -4.21 0.00
 24 0 13 5.04 0.00
 26 0 13 -5.36 0.00
 25 1 13 0.57 0.00
 27 1 13 6.74 0.00
 24 2 13 5.88 0.00
 26 2 13 -4.31 0.00
 25 3 13 -1.13 0.00
 27 3 13 0.13 0.00
 24 4 13 4.22 0.00
 26 4 13 -1.81 0.00
 23 5 13 -0.53 0.00
 25 5 13 1.39 0.00
 27 5 13 3.18 0.00
 24 6 13 -1.75 0.00
 26 6 13 -0.76 0.00
 23 7 13 2.26 0.00
 25 7 13 -0.57 0.00
 24 8 13 -6.40 0.00
 26 8 13 -2.39 0.00
 23 9 13 2.88 0.00
 25 9 13 -0.08 0.00
 24 10 13 0.43 0.00
 26 10 13 1.04 0.00
 23 11 13 0.30 0.00
 25 11 13 -2.78 0.00
 22 12 13 0.78 0.00
 24 12 13 -4.29 0.00
 26 12 13 -1.83 0.00
 23 13 13 1.60 0.00
 25 13 13 0.37 0.00
 22 14 13 -4.90 0.00
 24 14 13 -1.03 0.00
 21 15 13 -0.63 0.00
 23 15 13 -1.92 0.00
 25 15 13 -0.23 0.00
 22 16 13 3.85 0.00
 24 16 13 4.52 0.00
 21 17 13 -0.69 0.00
 23 17 13 -2.08 0.00
 25 17 13 -0.17 0.00
 20 18 13 -5.75 0.00
 22 18 13 0.05 0.00
 24 18 13 -5.46 0.00
 21 19 13 2.30 0.00
 23 19 13 1.92 0.00
 20 20 13 -8.74 0.00
 22 20 13 1.58 0.00
 24 20 13 -2.72 0.00
 19 21 13 2.71 0.00
 21 21 13 5.42 0.00
 23 21 13 1.41 0.00
 20 22 13 6.20 0.00
 22 22 13 4.73 0.00
 19 23 13 -4.35 0.00
 21 23 13 -4.07 0.00
 23 23 13 -6.51 0.00
 18 24 13 8.43 0.00
 20 24 13 -6.46 0.00
 22 24 13 -2.98 0.00
 17 25 13 6.02 0.00
 19 25 13 5.97 0.00
 21 25 13 3.86 0.00
 16 26 13 -6.93 0.00
 18 26 13 5.14 0.00
 20 26 13 -7.87 0.00
 15 27 13 1.32 0.00
 17 27 13 2.57 0.00
 19 27 13 1.55 0.00
 21 27 13 1.65 0.00
 0 28 13 7.14 0.00
 16 28 13 2.07 0.00
 18 28 13 5.36 0.00
 20 28 13 -2.81 0.00
 15 29 13 6.42 0.00
 17 29 13 -1.25 0.00
 19 29 13 3.07 0.00
 14 30 13 -0.18 0.00
 16 30 13 3.29 0.00
 18 30 13 0.98 0.00
 13 31 13 -1.54 0.00
 15 31 13 7.91 0.00
 17 31 13 -4.96 0.00
 19 31 13 -0.19 0.00
 12 32 13 -0.44 0.00
 14 32 13 2.14 0.00
 16 32 13 3.61 0.00
 18 32 13 2.19 0.00
 11 33 13 -4.92 0.00
 13 33 13 -4.14 0.00
 15 33 13 -1.24 0.00
 17 33 13 -6.57 0.00
 10 34 13 -6.04 0.00
 12 34 13 -10.43 0.00
 14 34 13 0.75 0.00
 16 34 13 1.71 0.00
 9 35 13 2.65 0.00
 11 35 13 9.76 0.00
 13 35 13 10.09 0.00
 15 35 13 5.33 0.00
 6 36 13 -0.39 0.00
 8 36 13 2.41 0.00
 10 36 13 2.36 0.00
 12 36 13 -0.84 0.00
 14 36 13 9.32 0.00
 5 37 13 5.74 0.00
 7 37 13 0.65 0.00
 9 37 13 8.40 0.00
 11 37 13 -0.06 0.00
 13 37 13 -4.08 0.00
 0 38 13 1.11 0.00
 2 38 13 -0.47 0.00
 4 38 13 -3.17 0.00
 6 38 13 -5.39 0.00
 8 38 13 -4.80 0.00
 10 38 13 -0.43 0.00
 12 38 13 -4.12 0.00
 1 39 13 -3.14 0.00
 3 39 13 -10.13 0.00
 5 39 13 -2.81 0.00
 7 39 13 -8.48 0.00
 9 39 13 -1.90 0.00
 11 39 13 -4.97 0.00
 0 40 13 -5.06 0.00
 2 40 13 -5.68 0.00
 4 40 13 -1.90 0.00
 6 40 13 0.40 0.00
 8 40 13 -1.40 0.00
 10 40 13 1.01 0.00
 1 41 13 0.92 0.00
 3 41 13 -3.45 0.00
 5 41 13 6.75 0.00
 7 41 13 0.26 0.00
 9 41 13 2.69 0.00
 0 42 13 4.09 0.00
 2 42 13 1.54 0.00
 4 42 13 0.87 0.00
 6 42 13 -0.24 0.00
 8 42 13 -0.74 0.00
 1 43 13 -3.83 0.00
 3 43 13 -2.78 0.00
 5 43 13 2.49 0.00
 0 44 13 -2.07 0.00
 22 0 14 -4.03 0.00
 24 0 14 -2.60 0.00
 26 0 14 -2.84 0.00
 23 1 14 0.05 0.00
 25 1 14 -1.11 0.00
 22 2 14 -4.38 0.00
 24 2 14 2.55 0.00
 26 2 14 -3.52 0.00
 23 3 14 -1.08 0.00
 25 3 14 -5.21 0.00
 22 4 14 2.72 0.00
 24 4 14 8.11 0.00
 23 5 14 0.01 0.00
 25 5 14 -0.69 0.00
 22 6 14 -1.48 0.00
 24 6 14 -0.20 0.00
 23 7 14 5.95 0.00
 25 7 14 1.31 0.00
 22 8 14 -4.78 0.00
 24 8 14 -3.78 0.00
 21 9 14 -5.38 0.00
 23 9 14 1.71 0.00
 25 9 14 0.14 0.00
 22 10 14 3.12 0.00
 24 10 14 3.29 0.00
 21 11 14 -2.28 0.00
 23 11 14 1.23 0.00
 25 11 14 -0.29 0.00
 22 12 14 0.28 0.00
 24 12 14 1.83 0.00
 21 13 14 -5.44 0.00
 23 13 14 1.83 0.00
 20 14 14 -2.89 0.00
 22 14 14 -5.58 0.00
 24 14 14 -1.30 0.00
 21 15 14 -12.51 0.00
 23 15 14 6.48 0.00
 20 16 14 3.77 0.00
 22 16 14 -0.03 0.00
 24 16 14 2.79 0.00
 19 17 14 8.22 0.00
 21 17 14 -7.96 0.00
 23 17 14 5.56 0.00
 20 18 14 -5.91 0.00
 22 18 14 -5.15 0.00
 19 19 14 -1.74 0.00
 21 19 14 -2.37 0.00
 23 19 14 2.40 0.00
 18 20 14 7.16 0.00
 20 20 14 0.17 0.00
 22 20 14 2.77 0.00
 19 21 14 -7.29 0.00
 21 21 14 1.46 0.00
 18 22 14 2.76 0.00
 20 22 14 -5.02 0.00
 22 22 14 1.03 0.00
 17 23 14 1.46 0.00
 19 23 14 -1.06 0.00
 21 23 14 5.24 0.00
 16 24 14 7.87 0.00
 18 24 14 12.44 0.00
 20 24 14 2.01 0.00
 15 25 14 -6.33 0.00
 17 25 14 -7.85 0.00
 19 25 14 -4.41 0.00
 0 26 14 3.58 0.00
 14 26 14 -3.85 0.00
 16 26 14 0.55 0.00
 18 26 14 -6.30 0.00
 20 26 14 -6.21 0.00
 15 27 14 1.63 0.00
 17 27 14 1.37 0.00
 19 27 14 8.00 0.00
 14 28 14 -3.74 0.00
 16 28 14 2.67 0.00
 18 28 14 -1.10 0.00
 13 29 14 4.33 0.00
 15 29 14 1.74 0.00
 17 29 14 -4.67 0.00
 12 30 14 9.97 0.00
 14 30 14 -3.70 0.00
 16 30 14 -1.19 0.00
 18 30 14 -4.63 0.00
 11 31 14 1.02 0.00
 13 31 14 -1.02 0.00
 15 31 14 -3.55 0.00
 17 31 14 -4.15 0.00
 8 32 14 -0.21 0.00
 10 32 14 -7.60 0.00
 12 32 14 -0.57 0.00
 14 32 14 -6.80 0.00
 16 32 14 1.87 0.00
 7 33 14 -3.14 0.00
 9 33 14 2.08 0.00
 11 33 14 0.08 0.00
 13 33 14 -2.86 0.00
 15 33 14 -3.67 0.00
 6 34 14 9.80 0.00
 8 34 14 10.07 0.00
 10 34 14 3.23 0.00
 12 34 14 5.33 0.00
 14 34 14 -0.19 0.00
 1 35 14 -1.61 0.00
 3 35 14 -4.39 0.00
 5 35 14 1.63 0.00
 7 35 14 0.54 0.00
 9 35 14 1.07 0.00
 11 35 14 2.32 0.00
 13 35 14 1.68 0.00
 0 36 14 1.38 0.00
 2 36 14 7.75 0.00
 4 36 14 2.13 0.00
 6 36 14 7.65 0.00
 8 36 14 1.81 0.00
 10 36 14 -2.78 0.00
 12 36 14 -3.22 0.00
 1 37 14 4.45 0.00
 3 37 14 1.66 0.00
 5 37 14 6.24 0.00
 7 37 14 2.15 0.00
 9 37 14 1.44 0.00
 11 37 14 -3.61 0.00
 0 38 14 -12.67 0.00
 2 38 14 -6.98 0.00
 4 38 14 -5.89 0.00
 6 38 14 -2.38 0.00
 8 38 14 -7.14 0.00
 10 38 14 -5.68 0.00
 1 39 14 -4.35 0.00
 3 39 14 -3.78 0.00
 5 39 14 2.26 0.00
 7 39 14 -1.96 0.00
 9 39 14 1.47 0.00
 0 40 14 3.51 0.00
 2 40 14 1.81 0.00
 4 40 14 3.66 0.00
 6 40 14 4.85 0.00
 8 40 14 2.51 0.00
 1 41 14 2.77 0.00
 3 41 14 0.83 0.00
 5 41 14 4.04 0.00
 0 42 14 1.83 0.00
 2 42 14 0.67 0.00
 20 0 15 5.43 0.00
 22 0 15 -5.99 0.00
 24 0 15 -1.29 0.00
 21 1 15 -1.66 0.00
 23 1 15 0.00 0.00
 20 2 15 10.80 0.00
 22 2 15 4.27 0.00
 24 2 15 5.77 0.00
 21 3 15 0.02 0.00
 23 3 15 1.56 0.00
 20 4 15 -4.15 0.00
 22 4 15 -2.07 0.00
 24 4 15 -1.36 0.00
 21 5 15 -1.22 0.00
 23 5 15 -2.55 0.00
 20 6 15 -1.07 0.00
 22 6 15 7.34 0.00
 24 6 15 -0.35 0.00
 21 7 15 0.62 0.00
 23 7 15 -1.30 0.00
 20 8 15 -4.49 0.00
 22 8 15 1.73 0.00
 24 8 15 -7.44 0.00
 21 9 15 4.22 0.00
 23 9 15 -0.22 0.00
 20 10 15 -5.59 0.00
 22 10 15 2.08 0.00
 19 11 15 -4.27 0.00
 21 11 15 1.48 0.00
 23 11 15 -2.35 0.00
 20 12 15 2.24 0.00
 22 12 15 5.24 0.00
 19 13 15 -0.88 0.00
 21 13 15 2.00 0.00
 23 13 15 1.16 0.00
 20 14 15 -5.01 0.00
 22 14 15 -0.24 0.00
 19 15 15 0.47 0.00
 21 15 15 1.89 0.00
 18 16 15 7.28 0.00
 20 16 15 -0.97 0.00
 22 16 15 5.86 0.00
 19 17 15 -1.48 0.00
 21 17 15 0.84 0.00
 18 18 15 3.41 0.00
 20 18 15 -2.14 0.00
 22 18 15 4.02 0.00
 17 19 15 -0.63 0.00
 19 19 15 -2.13 0.00
 21 19 15 1.73 0.00
 16 20 15 -1.24 0.00
 18 20 15 -4.02 0.00
 20 20 15 1.63 0.00
 17 21 15 -2.47 0.00
 19 21 15 -3.59 0.00
 21 21 15 4.18 0.00
 16 22 15 8.67 0.00
 18 22 15 1.13 0.00
 20 22 15 9.56 0.00
 15 23 15 0.13 0.00
 17 23 15 1.61 0.00
 19 23 15 -3.19 0.00
 14 24 15 -1.41 0.00
 16 24 15 -0.47 0.00
 18 24 15 -4.24 0.00
 13 25 15 -5.18 0.00
 15 25 15 -2.44 0.00
 17 25 15 -0.14 0.00
 19 25 15 -3.72 0.00
 12 26 15 -1.11 0.00
 14 26 15 -5.15 0.00
 16 26 15 0.21 0.00
 18 26 15 2.85 0.00
 11 27 15 1.76 0.00
 13 27 15 -0.51 0.00
 15 27 15 4.01 0.00
 17 27 15 -0.41 0.00
 10 28 15 0.36 0.00
 12 28 15 5.00 0.00
 14 28 15 0.33 0.00
 16 28 15 4.59 0.00
 9 29 15 0.10 0.00
 11 29 15 -4.44 0.00
 13 29 15 -5.97 0.00
 15 29 15 1.34 0.00
 17 29 15 -3.15 0.00
 8 30 15 -2.19 0.00
 10 30 15 -0.97 0.00
 12 30 15 -2.91 0.00
 14 30 15 -5.26 0.00
 16 30 15 -2.88 0.00
 7 31 15 -3.13 0.00
 9 31 15 -3.43 0.00
 11 31 15 0.77 0.00
 13 31 15 0.48 0.00
 15 31 15 6.62 0.00
 4 32 15 1.02 0.00
 6 32 15 2.44 0.00
 8 32 15 0.39 0.00
 10 32 15 -0.17 0.00
 12 32 15 -2.43 0.00
 14 32 15 1.96 0.00
 1 33 15 -7.17 0.00
 3 33 15 -4.71 0.00
 5 33 15 5.73 0.00
 7 33 15 6.98 0.00
 9 33 15 -0.43 0.00
 11 33 15 0.30 0.00
 13 33 15 -2.03 0.00
 0 34 15 -12.32 0.00
 2 34 15 -8.09 0.00
 4 34 15 -4.55 0.00
 6 34 15 -0.80 0.00
 8 34 15 4.24 0.00
 10 34 15 0.39 0.00
 12 34 15 -2.41 0.00
 1 35 15 -0.53 0.00
 3 35 15 0.12 0.00
 5 35 15 -2.73 0.00
 7 35 15 -4.23 0.00
 9 35 15 -3.12 0.00
 11 35 15 1.39 0.00
 0 36 15 4.57 0.00
 2 36 15 5.38 0.00
 4 36 15 6.16 0.00
 6 36 15 3.26 0.00
 8 36 15 6.74 0.00
 10 36 15 0.93 0.00
 1 37 15 -3.65 0.00
 3 37 15 0.74 0.00
 5 37 15 -2.59 0.00
 7 37 15 -2.22 0.00
 9 37 15 2.62 0.00
 0 38 15 0.50 0.00
 2 38 15 -1.36 0.00
 4 38 15 -2.76 0.00
 6 38 15 -5.40 0.00
 1 39 15 4.94 0.00
 3 39 15 2.61 0.00
 5 39 15 1.11 0.00
 0 40 15 1.88 0.00
 18 0 16 5.29 0.00
 20 0 16 7.59 0.00
 22 0 16 8.22 0.00
 19 1 16 6.01 0.00
 21 1 16 -5.75 0.00
 23 1 16 5.12 0.00
 18 2 16 -3.35 0.00
 20 2 16 -5.72 0.00
 22 2 16 0.57 0.00
 19 3 16 1.48 0.00
 21 3 16 -5.29 0.00
 23 3 16 3.18 0.00
 18 4 16 -2.85 0.00
 20 4 16 -3.08 0.00
 22 4 16 -1.32 0.00
 19 5 16 -0.29 0.00
 21 5 16 -4.33 0.00
 18 6 16 3.44 0.00
 20 6 16 3.97 0.00
 22 6 16 -0.26 0.00
 19 7 16 -0.47 0.00
 21 7 16 -0.93 0.00
 18 8 16 3.40 0.00
 20 8 16 1.76 0.00
 22 8 16 0.57 0.00
 19 9 16 -3.59 0.00
 21 9 16 1.62 0.00
 18 10 16 5.52 0.00
 20 10 16 -0.73 0.00
 22 10 16 1.00 0.00
 17 11 16 8.91 0.00
 19 11 16 0.06 0.00
 21 11 16 9.29 0.00
 18 12 16 5.00 0.00
 20 12 16 -4.56 0.00
 17 13 16 4.33 0.00
 19 13 16 -4.74 0.00
 21 13 16 3.11 0.00
 16 14 16 -3.76 0.00
 18 14 16 1.12 0.00
 20 14 16 -1.04 0.00
 17 15 16 6.60 0.00
 19 15 16 -2.34 0.00
 21 15 16 -1.07 0.00
 16 16 16 1.88 0.00
 18 16 16 5.46 0.00
 20 16 16 1.66 0.00
 15 17 16 -5.61 0.00
 17 17 16 -2.03 0.00
 19 17 16 -3.38 0.00
 16 18 16 -1.63 0.00
 18 18 16 4.64 0.00
 20 18 16 -0.44 0.00
 15 19 16 8.54 0.00
 17 19 16 3.21 0.00
 19 19 16 1.06 0.00
 14 20 16 6.75 0.00
 16 20 16 -2.77 0.00
 18 20 16 1.77 0.00
 13 21 16 -15.32 0.00
 15 21 16 4.73 0.00
 17 21 16 -6.21 0.00
 19 21 16 -1.56 0.00
 14 22 16 3.43 0.00
 16 22 16 -4.42 0.00
 18 22 16 -1.63 0.00
 13 23 16 -2.34 0.00
 15 23 16 9.93 0.00
 17 23 16 -2.12 0.00
 12 24 16 0.96 0.00
 14 24 16 -6.40 0.00
 16 24 16 -0.14 0.00
 11 25 16 0.54 0.00
 13 25 16 -5.69 0.00
 15 25 16 -2.27 0.00
 17 25 16 -3.76 0.00
 10 26 16 2.51 0.00
 12 26 16 5.14 0.00
 14 26 16 -1.33 0.00
 16 26 16 3.75 0.00
 9 27 16 2.81 0.00
 11 27 16 0.18 0.00
 13 27 16 1.05 0.00
 15 27 16 0.92 0.00
 6 28 16 -10.03 0.00
 8 28 16 2.33 0.00
 10 28 16 -6.75 0.00
 12 28 16 -0.55 0.00
 14 28 16 -3.17 0.00
 3 29 16 4.00 0.00
 5 29 16 14.16 0.00
 7 29 16 5.47 0.00
 9 29 16 5.09 0.00
 11 29 16 -0.10 0.00
 13 29 16 2.23 0.00
 0 30 16 -0.69 0.00
 2 30 16 -13.26 0.00
 4 30 16 5.59 0.00
 6 30 16 -5.55 0.00
 8 30 16 11.79 0.00
 10 30 16 2.88 0.00
 12 30 16 8.71 0.00
 1 31 16 -12.61 0.00
 3 31 16 -7.14 0.00
 5 31 16 -0.04 0.00
 7 31 16 -7.48 0.00
 9 31 16 2.55 0.00
 11 31 16 -2.03 0.00
 13 31 16 0.99 0.00
 0 32 16 9.38 0.00
 2 32 16 -4.72 0.00
 4 32 16 2.62 0.00
 6 32 16 -8.21 0.00
 8 32 16 -2.01 0.00
 10 32 16 -7.98 0.00
 12 32 16 -0.36 0.00
 1 33 16 3.17 0.00
 3 33 16 0.30 0.00
 5 33 16 0.27 0.00
 7 33 16 -6.20 0.00
 9 33 16 3.38 0.00
 11 33 16 -0.19 0.00
 0 34 16 -4.71 0.00
 2 34 16 -5.80 0.00
 4 34 16 -6.14 0.00
 6 34 16 -4.30 0.00
 8 34 16 0.40 0.00
 1 35 16 5.24 0.00
 3 35 16 0.28 0.00
 5 35 16 2.86 0.00
 7 35 16 -2.72 0.00
 0 36 16 3.43 0.00
 2 36 16 7.45 0.00
 4 36 16 -1.53 0.00
 6 36 16 -0.23 0.00
 1 37 16 -1.85 0.00
 3 37 16 -3.89 0.00
 12 0 17 0.20 0.00
 14 0 17 2.31 0.00
 16 0 17 12.22 0.00
 18 0 17 -4.59 0.00
 20 0 17 4.65 0.00
 15 1 17 -1.26 0.00
 17 1 17 1.43 0.00
 19 1 17 0.10 0.00
 21 1 17 -2.39 0.00
 16 2 17 1.65 0.00
 18 2 17 -8.53 0.00
 20 2 17 -0.35 0.00
 15 3 17 -1.39 0.00
 17 3 17 -2.24 0.00
 19 3 17 2.55 0.00
 21 3 17 2.06 0.00
 16 4 17 5.86 0.00
 18 4 17 2.82 0.00
 20 4 17 1.23 0.00
 15 5 17 -0.32 0.00
 17 5 17 1.91 0.00
 19 5 17 5.30 0.00
 21 5 17 0.87 0.00
 16 6 17 -3.14 0.00
 18 6 17 -2.75 0.00
 20 6 17 -2.25 0.00
 15 7 17 -5.75 0.00
 17 7 17 -1.22 0.00
 19 7 17 -5.38 0.00
 21 7 17 -5.43 0.00
 16 8 17 -0.52 0.00
 18 8 17 4.88 0.00
 20 8 17 3.64 0.00
 15 9 17 -4.46 0.00
 17 9 17 0.96 0.00
 19 9 17 0.67 0.00
 16 10 17 -3.81 0.00
 18 10 17 -4.04 0.00
 20 10 17 -4.33 0.00
 15 11 17 -1.59 0.00
 17 11 17 -0.21 0.00
 19 11 17 -0.25 0.00
 14 12 17 0.08 0.00
 16 12 17 0.26 0.00
 18 12 17 1.35 0.00
 20 12 17 -0.56 0.00
 15 13 17 -1.24 0.00
 17 13 17 0.49 0.00
 19 13 17 0.60 0.00
 14 14 17 -4.24 0.00
 16 14 17 -5.50 0.00
 18 14 17 -1.63 0.00
 13 15 17 -0.67 0.00
 15 15 17 4.99 0.00
 17 15 17 0.05 0.00
 19 15 17 2.34 0.00
 14 16 17 1.27 0.00
 16 16 17 2.75 0.00
 18 16 17 3.42 0.00
 13 17 17 -3.13 0.00
 15 17 17 -0.78 0.00
 17 17 17 -4.88 0.00
 12 18 17 6.04 0.00
 14 18 17 4.03 0.00
 16 18 17 1.49 0.00
 18 18 17 -1.70 0.00
 11 19 17 1.96 0.00
 13 19 17 -3.67 0.00
 15 19 17 4.15 0.00
 17 19 17 1.05 0.00
 10 20 17 -6.42 0.00
 12 20 17 -4.88 0.00
 14 20 17 -6.40 0.00
 16 20 17 -1.92 0.00
 11 21 17 2.38 0.00
 13 21 17 -1.72 0.00
 15 21 17 6.41 0.00
 17 21 17 0.03 0.00
 10 22 17 2.61 0.00
 12 22 17 4.99 0.00
 14 22 17 5.77 0.00
 16 22 17 2.18 0.00
 7 23 17 0.00 0.00
 9 23 17 2.29 0.00
 11 23 17 4.25 0.00
 13 23 17 -2.55 0.00
 15 23 17 3.74 0.00
 6 24 17 -4.33 0.00
 8 24 17 -0.23 0.00
 10 24 17 -10.40 0.00
 12 24 17 -4.39 0.00
 14 24 17 -2.08 0.00
 5 25 17 1.47 0.00
 7 25 17 -5.97 0.00
 9 25 17 -3.94 0.00
 11 25 17 -1.50 0.00
 13 25 17 -1.29 0.00
 0 26 17 -18.76 0.00
 2 26 17 -19.72 0.00
 4 26 17 -3.39 0.00
 6 26 17 -4.93 0.00
 8 26 17 5.41 0.00
 10 26 17 -0.16 0.00
 12 26 17 5.43 0.00
 14 26 17 0.38 0.00
 1 27 17 -7.47 0.00
 3 27 17 -9.98 0.00
 5 27 17 -5.22 0.00
 7 27 17 -4.17 0.00
 9 27 17 5.52 0.00
 11 27 17 -0.61 0.00
 13 27 17 3.35 0.00
 0 28 17 12.77 0.00
 2 28 17 1.73 0.00
 4 28 17 1.00 0.00
 6 28 17 -4.66 0.00
 8 28 17 -2.61 0.00
 10 28 17 -3.63 0.00
 12 28 17 3.93 0.00
 1 29 17 1.69 0.00
 3 29 17 0.75 0.00
 5 29 17 5.43 0.00
 7 29 17 -2.37 0.00
 9 29 17 2.87 0.00
 11 29 17 -3.35 0.00
 0 30 17 -0.81 0.00
 2 30 17 -7.47 0.00
 4 30 17 -6.96 0.00
 6 30 17 -7.12 0.00
 8 30 17 -3.14 0.00
 10 30 17 -0.91 0.00
 1 31 17 -0.23 0.00
 3 31 17 -8.75 0.00
 5 31 17 -1.33 0.00
 7 31 17 -4.33 0.00
 9 31 17 0.13 0.00
 0 32 17 8.78 0.00
 2 32 17 3.19 0.00
 4 32 17 2.53 0.00
 6 32 17 -1.83 0.00
 8 32 17 -0.54 0.00
 1 33 17 5.37 0.00
 3 33 17 0.59 0.00
 5 33 17 5.70 0.00
 0 34 17 -0.56 0.00
 2 34 17 -4.09 0.00
 4 34 17 0.80 0.00
 12 0 18 -6.93 0.00
 14 0 18 -7.10 0.00
 16 0 18 -1.20 0.00
 18 0 18 -8.78 0.00
 11 1 18 1.72 0.00
 13 1 18 -5.87 0.00
 15 1 18 3.89 0.00
 17 1 18 -8.41 0.00
 19 1 18 3.59 0.00
 12 2 18 -0.43 0.00
 14 2 18 4.83 0.00
 16 2 18 8.04 0.00
 18 2 18 -3.82 0.00
 13 3 18 2.85 0.00
 15 3 18 9.33 0.00
 17 3 18 -0.58 0.00
 19 3 18 4.93 0.00
 12 4 18 -7.76 0.00
 14 4 18 1.92 0.00
 16 4 18 0.54 0.00
 18 4 18 -3.13 0.00
 13 5 18 -5.40 0.00
 15 5 18 -1.73 0.00
 17 5 18 -2.27 0.00
 19 5 18 1.99 0.00
 12 6 18 -3.95 0.00
 14 6 18 5.87 0.00
 16 6 18 -0.04 0.00
 18 6 18 1.53 0.00
 13 7 18 4.12 0.00
 15 7 18 2.60 0.00
 17 7 18 1.25 0.00
 12 8 18 -3.88 0.00
 14 8 18 4.48 0.00
 16 8 18 -0.07 0.00
 18 8 18 1.61 0.00
 11 9 18 -3.45 0.00
 13 9 18 1.71 0.00
 15 9 18 1.38 0.00
 17 9 18 1.80 0.00
 12 10 18 -2.47 0.00
 14 10 18 2.47 0.00
 16 10 18 -1.23 0.00
 18 10 18 0.16 0.00
 11 11 18 -2.56 0.00
 13 11 18 1.53 0.00
 15 11 18 1.45 0.00
 17 11 18 0.25 0.00
 10 12 18 3.57 0.00
 12 12 18 -6.50 0.00
 14 12 18 1.42 0.00
 16 12 18 0.70 0.00
 11 13 18 -2.70 0.00
 13 13 18 1.42 0.00
 15 13 18 0.85 0.00
 17 13 18 0.85 0.00
 10 14 18 0.50 0.00
 12 14 18 -3.39 0.00
 14 14 18 5.00 0.00
 16 14 18 -0.83 0.00
 9 15 18 -2.23 0.00
 11 15 18 -4.38 0.00
 13 15 18 0.74 0.00
 15 15 18 -0.36 0.00
 17 15 18 0.92 0.00
 8 16 18 0.68 0.00
 10 16 18 -3.99 0.00
 12 16 18 -2.37 0.00
 14 16 18 -1.78 0.00
 16 16 18 -5.57 0.00
 7 17 18 3.71 0.00
 9 17 18 4.50 0.00
 11 17 18 1.44 0.00
 13 17 18 5.14 0.00
 15 17 18 -0.82 0.00
 8 18 18 3.66 0.00
 10 18 18 -0.89 0.00
 12 18 18 0.55 0.00
 14 18 18 -1.27 0.00
 7 19 18 -4.93 0.00
 9 19 18 -2.19 0.00
 11 19 18 -3.09 0.00
 13 19 18 0.83 0.00
 15 19 18 -3.09 0.00
 4 20 18 -4.65 0.00
 6 20 18 -2.00 0.00
 8 20 18 -4.66 0.00
 10 20 18 -4.95 0.00
 12 20 18 -1.24 0.00
 14 20 18 1.29 0.00
 3 21 18 0.28 0.00
 5 21 18 0.03 0.00
 7 21 18 -3.89 0.00
 9 21 18 1.78 0.00
 11 21 18 -0.20 0.00
 13 21 18 2.71 0.00
 0 22 18 1.41 0.00
 2 22 18 8.34 0.00
 4 22 18 -4.63 0.00
 6 22 18 1.63 0.00
 8 22 18 -2.59 0.00
 10 22 18 -0.30 0.00
 12 22 18 -0.42 0.00
 1 23 18 0.89 0.00
 3 23 18 2.31 0.00
 5 23 18 -1.57 0.00
 7 23 18 -7.74 0.00
 9 23 18 -0.91 0.00
 11 23 18 -1.25 0.00
 13 23 18 3.78 0.00
 0 24 18 -12.19 0.00
 2 24 18 -1.34 0.00
 4 24 18 -6.96 0.00
 6 24 18 4.74 0.00
 8 24 18 -1.31 0.00
 10 24 18 -0.54 0.00
 12 24 18 -0.25 0.00
 1 25 18 -4.75 0.00
 3 25 18 -1.34 0.00
 5 25 18 -2.00 0.00
 7 25 18 -2.96 0.00
 9 25 18 1.95 0.00
 11 25 18 -0.96 0.00
 0 26 18 -12.56 0.00
 2 26 18 -4.36 0.00
 4 26 18 -6.60 0.00
 6 26 18 -2.79 0.00
 8 26 18 -2.39 0.00
 10 26 18 -5.49 0.00
 1 27 18 6.16 0.00
 3 27 18 2.87 0.00
 5 27 18 0.87 0.00
 7 27 18 -1.12 0.00
 9 27 18 -3.05 0.00
 0 28 18 6.10 0.00
 2 28 18 6.21 0.00
 4 28 18 7.33 0.00
 6 28 18 -1.10 0.00
 8 28 18 4.06 0.00
 1 29 18 -1.30 0.00
 3 29 18 -0.50 0.00
 5 29 18 3.51 0.00
 7 29 18 5.01 0.00
 0 30 18 6.36 0.00
 2 30 18 -1.14 0.00
 4 30 18 4.71 0.00
 1 31 18 1.28 0.00
 3 31 18 6.23 0.00
 8 0 19 -3.38 0.00
 10 0 19 -2.79 0.00
 12 0 19 -0.59 0.00
 14 0 19 -0.28 0.00
 16 0 19 4.13 0.00
 9 1 19 -2.70 0.00
 11 1 19 6.34 0.00
 13 1 19 2.53 0.00
 15 1 19 1.80 0.00
 17 1 19 2.08 0.00
 10 2 19 0.14 0.00
 12 2 19 1.17 0.00
 14 2 19 -2.03 0.00
 16 2 19 1.53 0.00
 9 3 19 -3.89 0.00
 11 3 19 1.28 0.00
 13 3 19 -1.21 0.00
 15 3 19 -1.45 0.00
 10 4 19 -1.91 0.00
 12 4 19 2.09 0.00
 14 4 19 -1.77 0.00
 16 4 19 1.35 0.00
 9 5 19 -3.02 0.00
 11 5 19 6.11 0.00
 13 5 19 3.85 0.00
 15 5 19 1.40 0.00
 10 6 19 -1.11 0.00
 12 6 19 5.24 0.00
 14 6 19 1.44 0.00
 16 6 19 -0.68 0.00
 9 7 19 -8.37 0.00
 11 7 19 -3.73 0.00
 13 7 19 -6.51 0.00
 15 7 19 -3.31 0.00
 8 8 19 -6.45 0.00
 10 8 19 -4.62 0.00
 12 8 19 -1.64 0.00
 14 8 19 -1.14 0.00
 16 8 19 -1.11 0.00
 9 9 19 -5.55 0.00
 11 9 19 3.54 0.00
 13 9 19 3.12 0.00
 15 9 19 -0.84 0.00
 8 10 19 3.15 0.00
 10 10 19 2.48 0.00
 12 10 19 -2.03 0.00
 14 10 19 -2.55 0.00
 7 11 19 -5.77 0.00
 9 11 19 -9.39 0.00
 11 11 19 -0.10 0.00
 13 11 19 0.91 0.00
 15 11 19 -3.55 0.00
 6 12 19 -0.24 0.00
 8 12 19 -6.26 0.00
 10 12 19 -3.08 0.00
 12 12 19 0.81 0.00
 14 12 19 0.15 0.00
 5 13 19 -3.03 0.00
 7 13 19 -7.21 0.00
 9 13 19 0.63 0.00
 11 13 19 -2.27 0.00
 13 13 19 -0.78 0.00
 15 13 19 -3.61 0.00
 4 14 19 -3.31 0.00
 6 14 19 0.71 0.00
 8 14 19 -0.54 0.00
 10 14 19 2.48 0.00
 12 14 19 2.13 0.00
 14 14 19 0.77 0.00
 1 15 19 8.11 0.00
 3 15 19 11.05 0.00
 5 15 19 7.76 0.00
 7 15 19 1.45 0.00
 9 15 19 5.03 0.00
 11 15 19 -1.33 0.00
 13 15 19 6.98 0.00
 0 16 19 -3.93 0.00
 2 16 19 0.81 0.00
 4 16 19 -0.62 0.00
 6 16 19 -0.26 0.00
 8 16 19 4.80 0.00
 10 16 19 2.75 0.00
 12 16 19 -2.53 0.00
 1 17 19 4.74 0.00
 3 17 19 3.29 0.00
 5 17 19 0.77 0.00
 7 17 19 -0.58 0.00
 9 17 19 1.56 0.00
 11 17 19 0.10 0.00
 13 17 19 5.49 0.00
 0 18 19 -5.12 0.00
 2 18 19 -1.80 0.00
 4 18 19 0.17 0.00
 6 18 19 -5.76 0.00
 8 18 19 -2.13 0.00
 10 18 19 -3.84 0.00
 12 18 19 0.13 0.00
 1 19 19 -8.46 0.00
 3 19 19 -3.21 0.00
 5 19 19 -0.26 0.00
 7 19 19 3.31 0.00
 9 19 19 0.81 0.00
 11 19 19 -2.04 0.00
 0 20 19 4.93 0.00
 2 20 19 4.98 0.00
 4 20 19 -0.05 0.00
 6 20 19 -1.11 0.00
 8 20 19 3.99 0.00
 10 20 19 -3.68 0.00
 1 21 19 1.40 0.00
 3 21 19 3.90 0.00
 5 21 19 -1.39 0.00
 7 21 19 0.15 0.00
 9 21 19 -0.55 0.00
 11 21 19 0.08 0.00
 0 22 19 -6.62 0.00
 2 22 19 1.13 0.00
 4 22 19 -4.04 0.00
 6 22 19 1.21 0.00
 8 22 19 6.81 0.00
 10 22 19 -2.12 0.00
 1 23 19 -5.96 0.00
 3 23 19 0.48 0.00
 5 23 19 -2.48 0.00
 7 23 19 -2.41 0.00
 9 23 19 0.30 0.00
 0 24 19 -5.90 0.00
 2 24 19 3.67 0.00
 4 24 19 -4.67 0.00
 6 24 19 -2.58 0.00
 8 24 19 2.19 0.00
 1 25 19 2.00 0.00
 3 25 19 4.16 0.00
 5 25 19 0.11 0.00
 7 25 19 -0.85 0.00
 0 26 19 -3.46 0.00
 2 26 19 3.56 0.00
 4 26 19 1.79 0.00
 1 27 19 4.09 0.00
 3 27 19 3.89 0.00
 0 0 0 0.00 0.00
# SQUEEZE RESULTS (Version = 150216)
# Note: Data are Listed for all Voids in the P1 Unit Cell
# i.e. Centre of Gravity, Solvent Accessible Volume,
# Recovered number of Electrons in the Void and
# Details about the Squeezed Material
;
loop_
  _platon_missing_refln_index_h
  _platon_missing_refln_index_k
  _platon_missing_refln_index_l
  _platon_missing_refln_theta
 1 1 0 2.013
 0 2 0 2.115
 0 0 1 2.622
 2 0 1 4.317
 1 1 1 3.306
 0 18 2 20.149
 0 20 2 22.343

_platon_squeeze_details
;
TITL 3 in Cmmm
CELL   25.7916   41.7841   16.8545     90.00     90.00     90.00
SPGR Cmmm
# Solvent Accessible Volume =      8463
# Electrons Found in S.A.V. =      2021
# Note: Atoms in Void as Cxxx and Qxxx all others
C101 1.000 0.164 0.007 !       2.97 eA-3
C102 0.162 0.078-0.007 !       2.41 eA-3
C103 0.500 0.437 0.258 !       2.40 eA-3
C104 0.500 0.188 0.492 !       1.86 eA-3
Q105 0.500 0.070 0.497 !       1.71 eA-3
C106 0.196 0.062 0.013 !       1.71 eA-3
Q107 0.500 0.105 0.252 !       1.68 eA-3
C108 0.179 0.117 0.498 !       1.64 eA-3
C109 0.584 0.227 0.489 !       1.54 eA-3
Q110 0.287 0.453 0.076 !       1.54 eA-3
Q111 0.593 0.499 0.359 !       1.49 eA-3
C112 1.000 0.180 0.059 !       1.41 eA-3
C113 0.310 0.109 0.507 !       1.34 eA-3
C114 0.147 0.141 0.002 !       1.30 eA-3
C115 0.791 0.384 0.480 !       1.26 eA-3
C116 0.500 0.279 0.208 !       1.25 eA-3
C117 0.086 0.180 0.001 !       1.23 eA-3
C118 0.045 0.172 0.011 !       1.22 eA-3
C119 0.500 0.135 0.237 !       1.21 eA-3
C120 0.517 0.405 0.358 !       1.20 eA-3
Q121 0.266 0.500 0.125 !       1.18 eA-3
C122 0.602 0.195 0.503 !       1.18 eA-3
C123 0.249 0.070 0.003 !       1.14 eA-3
C124 0.893 0.148 0.491 !       1.14 eA-3
Q125 0.307 0.500 0.125 !       1.12 eA-3
C126 0.658 0.125 0.496 !       1.11 eA-3
C127 0.469 0.274 0.200 !       1.11 eA-3
C128 0.816 0.094-0.004 !       1.08 eA-3
C129 1.000 0.370 0.175 !       1.07 eA-3
C130 0.849 0.141 0.498 !       1.06 eA-3
C131 0.779 0.415 0.415 !       1.06 eA-3
C132 0.539 0.264 0.261 !       1.04 eA-3
Q133 0.929 0.288 0.406 !       0.99 eA-3
C134 0.781 0.102-0.004 !       0.98 eA-3
C135 0.892 0.156-0.007 !       0.97 eA-3
C136 1.000 0.117 0.669 !       0.97 eA-3
C137 0.500 0.383 0.331 !       0.97 eA-3
C138 0.749 0.109 0.502 !       0.97 eA-3
C139 1.000 0.076 0.311 !       0.95 eA-3
C140 0.484 0.149 0.156 !       0.95 eA-3
C141 0.313 0.078-0.007 !       0.94 eA-3
C142 0.514 0.305 0.093 !       0.94 eA-3
C143 0.353 0.180 0.500 !       0.94 eA-3
C144 0.500 0.158 0.161 !       0.93 eA-3
Q145 0.563 0.462 0.341 !       0.93 eA-3
C146 0.479 0.296 0.124 !       0.93 eA-3
C147 1.000 0.203 0.503 !       0.92 eA-3
Q148 0.194 0.125 0.006 !       0.88 eA-3
C149 0.055 0.503 0.141 !       0.88 eA-3
C150 0.783 0.021 0.308 !       0.88 eA-3
C151 0.866 0.117 0.500 !       0.88 eA-3
C152 1.000 0.057 0.332 !       0.87 eA-3
C153 0.690 0.496 0.344 !       0.87 eA-3
C154 0.500 0.299 0.315 !       0.87 eA-3
Q155 0.021 0.070 0.004 !       0.85 eA-3
Q156 0.086 0.039-0.004 !       0.85 eA-3
C157 0.500 0.176 0.146 !       0.84 eA-3
C158 0.675 0.039 0.006 !       0.84 eA-3
C159 0.031 0.196 0.032 !       0.82 eA-3
Q160 0.765 0.237 0.080 !       0.81 eA-3
C161 1.000 0.234 0.498 !       0.81 eA-3
Q162 1.000 0.497 0.203 !       0.80 eA-3
Q163 0.350 0.063 0.503 !       0.80 eA-3
C164 0.508 0.271 0.316 !       0.80 eA-3
Q165 0.037 0.500 0.500 !       0.80 eA-3
Q166 0.664 0.039 0.495 !       0.80 eA-3
C167 0.320 0.487 0.317 !       0.79 eA-3
C168 0.049 0.219 0.494 !       0.79 eA-3
C169 0.280 0.500 0.234 !       0.79 eA-3
Q170 0.326 0.023 0.500 !       0.79 eA-3
Q171 0.797 0.113 0.032 !       0.78 eA-3
Q172 0.865 0.055 0.005 !       0.78 eA-3
C173 0.052 0.203 0.502 !       0.78 eA-3
C174 0.053 0.229 0.116 !       0.77 eA-3
C175 0.500 0.401 0.248 !       0.77 eA-3
C176 1.000 0.259 0.359 !       0.77 eA-3
C177 1.000 0.233 0.356 !       0.77 eA-3
C178 0.072 0.166 0.463 !       0.77 eA-3
C179 0.428 0.334 0.537 !       0.77 eA-3
C180 1.000 0.346 0.109 !       0.76 eA-3
C181 0.500 0.284 0.363 !       0.75 eA-3
Q182 0.958 0.020 0.288 !       0.75 eA-3
C183 0.539 0.250-0.004 !       0.75 eA-3
Q184 0.820 0.253 0.190 !       0.74 eA-3
Q185 0.803 0.415 0.454 !       0.74 eA-3
C186 0.446 0.221 0.062 !       0.73 eA-3
C187 0.513 0.191 0.127 !       0.73 eA-3
Q188 0.633 0.148 0.501 !       0.71 eA-3
Q189 1.000 0.406 0.414 !       0.71 eA-3
Q190 0.678 0.016 0.477 !       0.70 eA-3
Q191 0.922 0.371 0.388 !       0.70 eA-3
C192 0.609 0.094 0.011 !       0.70 eA-3
C193 0.500 0.307 0.241 !       0.70 eA-3
Q194 0.235 0.440 0.385 !       0.70 eA-3
Q195 0.261 0.040 0.376 !       0.70 eA-3
C196 0.239 0.427 0.409 !       0.70 eA-3
C197 0.477 0.250 0.383 !       0.69 eA-3
Q198 1.000 0.344 0.376 !       0.69 eA-3
Q199 0.500 0.476 0.077 !       0.69 eA-3
;
loop_
  _platon_squeeze_void_nr
  _platon_squeeze_void_average_x
  _platon_squeeze_void_average_y
  _platon_squeeze_void_average_z
  _platon_squeeze_void_volume
  _platon_squeeze_void_count_electrons
  _platon_squeeze_void_content
 1 0.273 -0.004 -0.057 8515 2025 ' '

_platon_squeeze_void_probe_radius  1.20
loop_
  _refln_index_h
  _refln_index_k
  _refln_index_l
  _refln_F_squared_meas
  _refln_F_squared_sigma
  _refln_scale_group_code
 0 0 2 99779.1 1029.48 1
 0 0 3 -52.0773 82.4847 1
 0 0 4 202918 2015.27 1
 0 0 5 248.675 109.842 1
 0 0 6 1584.47 239.078 1
 0 0 7 3294.4 415.049 1
 0 0 8 389319 4213.06 1
 0 0 -9 22522.5 857.802 5
 0 0 -10 328456 3274.1 5
 0 0 -10 350367 3334.87 4
 0 0 -11 15234.7 798.3 4
 0 0 -11 15237.1 816.976 5
 0 0 -12 114615 2158.72 4
 0 0 -12 105751 2117.55 5
 0 0 -13 425.583 215.772 5
 0 0 -14 201.387 169.865 5
 0 0 -15 140.782 139.18 5
 0 0 -16 1002.69 269.867 5
 0 0 -17 7005.28 622.43 5
 0 0 -18 23078.8 1012.08 5
 0 0 -19 10241.9 623.294 5
 0 2 -1 108457 882.243 1
 0 2 2 178228 1312.33 1
 0 2 -2 180489 1543.16 1
 0 2 -3 22699.6 675.631 1
 0 2 3 22356.5 572.593 1
 0 2 4 118388 1533.88 1
 0 -2 5 31623.4 955.838 1
 0 2 5 29440.6 873.184 1
 0 2 6 35024.7 1037.92 1
 0 -2 6 34299.3 1055.26 1
 0 -2 7 7412.64 542.021 1
 0 2 7 6415.06 505.402 1
 0 2 8 402185 4169.2 1
 0 -2 -9 52542.4 1261.32 5
 0 -2 -10 166806 2360.16 4
 0 -2 -10 169425 2318.98 5
 0 -2 -11 22843.7 961.374 5
 0 -2 -11 21401.7 1003.8 4
 0 -2 -12 17424.1 854.905 5
 0 2 -12 16398 873.395 5
 0 -2 -12 18060.9 896.241 4
 0 -2 -13 642.219 241.594 5
 0 2 -13 646.297 218.168 5
 0 -2 -13 456.511 197.544 4
 0 -2 -14 1961.79 323.429 5
 0 2 -14 1768.77 328.134 5
 0 -2 -14 2211.71 345.462 4
 0 -2 -15 2540.66 402.156 5
 0 2 -15 3248.12 458.457 5
 0 2 -16 1551.89 329.989 5
 0 -2 -16 1699.04 326.453 5
 0 2 -17 3477.75 442.109 5
 0 -2 -17 3284.85 453.355 5
 0 2 -18 32052.2 1192.39 5
 0 -2 -18 28802.7 1102.29 5
 0 -2 -19 6241.9 478.044 5
 0 2 -19 5868.66 486.017 5
 0 4 0 457586 1193.95 1
 0 -4 0 442119 1006.93 1
 0 -4 1 49693.4 630.461 1
 0 4 -1 49508 657.694 1
 0 4 -2 201165 1732.78 1
 0 -4 2 199644 1591.52 1
 0 4 -3 1022.02 186.174 1
 0 4 3 1227.84 146.891 1
 0 4 -4 725301 4629.1 1
 0 4 4 723954 3676.5 1
 0 4 5 55043.8 1142.72 1
 0 4 6 144607 2054.17 1
 0 -4 6 145667 2218.9 1
 0 -4 7 2408.49 321.738 1
 0 4 7 2255.47 303.375 1
 0 4 8 93635.6 1979.42 1
 0 -4 -9 119896 1841.68 5
 0 -4 -9 122926 1964.89 4
 0 -4 -10 79401.9 1697.18 4
 0 -4 -10 78113.6 1564.86 5
 0 4 -11 3645.52 407.951 5
 0 -4 -11 3611.53 397.293 5
 0 -4 -11 2800.19 393.056 4
 0 4 -12 291.317 173.358 5
 0 -4 -12 166.001 157.181 5
 0 -4 -12 231.255 174.895 4
 0 -4 -13 5989.75 555.459 4
 0 4 -13 6600.02 595.95 5
 0 -4 -13 5780.41 538.872 5
 0 4 -14 35175.8 1376.01 5
 0 -4 -14 34219.4 1307.44 4
 0 -4 -14 31426.1 1264.71 5
 0 -4 -15 9066.44 700.388 5
 0 -4 -15 9899.19 736.764 4
 0 4 -16 10756.3 813.366 5
 0 -4 -16 12234.8 777.736 5
 0 4 -17 6999.86 630.571 5
 0 -4 -17 7469.48 608.926 5
 0 -4 -18 6070.31 501.752 5
 0 4 -18 5571.56 524.909 5
 0 4 -19 9651.31 635.408 5
 0 -4 -19 7668.71 515.169 5
 0 6 0 39910.8 469.256 1
 0 6 1 3559.87 86.7626 2
 0 -6 1 3588.75 171.714 1
 0 6 -1 3805.68 209.142 1
 0 -6 2 89903.1 1118.85 1
 0 6 -2 89483.8 1246.48 1
 0 6 -3 10702.9 517.914 1
 0 6 3 11012.3 379.97 1
 0 6 4 122477 1468.13 1
 0 6 -4 120018 1985.1 1
 0 6 5 285592 2534.56 1
 0 -6 5 297069 2940.34 1
 0 6 6 43569.6 1105.19 1
 0 -6 6 45431.3 1271.88 1
 0 6 7 21819.3 870.428 1
 0 -6 7 21868.7 953.02 1
 0 6 8 14876.1 774.723 1
 0 -6 -9 107118 1880.57 4
 0 -6 -9 95553.7 1670.66 5
 0 -6 -10 52672.4 1283.1 5
 0 -6 -10 47284.4 1372.57 4
 0 -6 -11 774.261 231.234 4
 0 -6 -11 774.046 216.57 5
 0 -6 -12 4135.87 437.803 5
 0 6 -12 3778.62 478.346 5
 0 -6 -12 4130.48 464.815 4
 0 -6 -13 39417.9 1305.53 5
 0 6 -13 42560.6 1481.94 5
 0 -6 -13 40094.5 1453.44 4
 0 -6 -14 69515.4 1792.86 5
 0 6 -14 68186.1 1936.36 5
 0 -6 -14 66717.2 1889.39 4
 0 6 -15 60113.2 1872.9 5
 0 -6 -15 60676.1 1716.83 5
 0 -6 -16 15637.6 861.359 5
 0 -6 -16 13604.2 840.684 4
 0 6 -16 16009.1 932.417 5
 0 6 -17 535.223 224.894 5
 0 -6 -17 509.774 189.07 5
 0 -6 -18 12235.5 701.736 5
 0 6 -18 10544.9 712.21 5
 0 6 -19 11732.8 687.529 5
 0 8 0 49920.4 634.821 1
 0 -8 1 7410.48 252.828 1
 0 8 1 7696.87 156.476 1
 0 8 -1 7661.19 337.075 1
 0 8 2 49679 503.935 2
 0 -8 2 50599.2 837.574 1
 0 -8 3 637941 3525.85 1
 0 8 3 646081 2720.96 1
 0 8 -3 646815 4169.95 1
 0 -8 4 21020.7 739.716 1
 0 8 4 21526.1 597.83 1
 0 8 -4 21390.2 897.663 1
 0 8 5 373564 2777.75 1
 0 -8 5 382005 3393.07 1
 0 -8 6 130306 2171.95 1
 0 8 6 129561 1842.62 1
 0 8 7 91905.2 1699.24 1
 0 -8 7 89792.5 1926.44 1
 0 8 8 0.15004 94.1881 1
 0 -8 -8 113.078 88.2918 4
 0 -8 -9 8646.95 560.615 4
 0 -8 -9 8097.2 486.864 5
 0 -8 -10 9679.19 565.078 5
 0 -8 -10 8470.48 653.507 4
 0 -8 -11 20204.8 967.225 4
 0 -8 -11 19622.7 841.603 5
 0 -8 -12 6668.63 530.592 5
 0 -8 -12 6914.87 608.247 4
 0 8 -12 6312.74 586.441 5
 0 8 -13 105428 2338.92 5
 0 -8 -13 102905 2088.74 5
 0 -8 -14 51866.5 1726.52 4
 0 8 -14 49668.2 1715.3 5
 0 -8 -15 94909 2132.29 5
 0 8 -15 96807.7 2390.88 5
 0 8 -16 26296.7 1281.96 5
 0 -8 -16 27957.2 1137.81 5
 0 -8 -16 26205.9 1184.1 4
 0 -8 -17 -87.172 118.81 5
 0 8 -17 276.488 208.345 5
 0 8 -18 616.758 204.462 5
 0 8 -19 522.47 178.965 5
 0 10 0 65283.2 844.641 1
 0 -10 1 12345.1 358.35 1
 0 10 1 13509.1 295.599 1
 0 -10 2 8639.52 349.6 1
 0 10 -2 7314.14 421.899 1
 0 10 -3 60938.7 1370.43 1
 0 10 3 60928.5 772.605 1
 0 -10 4 36447.2 968.854 1
 0 10 -4 36763 1213.36 1
 0 10 4 37084.8 719.462 1
 0 -10 5 515832 3962.93 1
 0 10 5 508655 3049.99 1
 0 10 6 48658.9 1098.55 1
 0 -10 6 47396.3 1338.57 1
 0 10 7 289329 2845.49 1
 0 10 8 2210.88 281.894 1
 0 -10 -8 2554.06 331.449 4
 0 -10 -8 2822.14 293.189 5
 0 -10 -9 54057.7 1260.73 5
 0 -10 -9 54573.1 1441.41 4
 0 -10 -10 15678.4 865.374 4
 0 -10 -10 17159.6 759.988 5
 0 -10 -11 1291.01 224.874 5
 0 -10 -11 1314.68 281.747 4
 0 -10 -12 189.394 147.425 5
 0 -10 -12 753.892 325.668 4
 0 10 -13 67436.9 1990.58 5
 0 -10 -13 72617.1 1798.1 5
 0 -10 -14 23003.9 1256.16 4
 0 10 -14 23686.7 1266.99 5
 0 10 -15 139724 2879.1 5
 0 -10 -15 131813 2428.42 5
 0 -10 -16 3804.59 510.552 4
 0 -10 -16 3629 449.878 5
 0 10 -16 3824.41 533.628 5
 0 -10 -17 -67.9325 122.616 5
 0 -10 -17 -175.754 223.069 4
 0 10 -17 227.389 193.927 5
 0 10 -18 -295.442 162.099 5
 0 10 -19 -15.8905 118.893 5
 0 -12 0 1192.74 111.82 2
 0 12 0 1781.97 203.345 1
 0 -12 1 340097 1804.17 1
 0 12 -1 300421 2435.02 1
 0 12 -2 26.1468 117.141 1
 0 -12 2 238.431 82.6217 1
 0 12 2 102.552 27.2112 1
 0 12 3 70327 707.386 1
 0 -12 3 69737.1 1169.67 1
 0 12 4 1763.7 147.206 1
 0 12 -4 1892.85 344.394 1
 0 -12 4 2001.57 245.629 1
 0 12 5 439153 2583.18 1
 0 -12 5 436011 3679.49 1
 0 12 6 17760 626.655 1
 0 -12 6 18894.6 874.675 1
 0 12 7 221869 2266.18 1
 0 -12 -7 249066 2778.44 4
 0 -12 -8 1198.67 236.408 4
 0 -12 -8 1277.9 219.601 5
 0 -12 -9 268488 2796.74 5
 0 -12 -9 240702 3159.17 4
 0 -12 -10 6805.29 540.962 5
 0 -12 -10 6812.78 635.657 4
 0 -12 -11 19767.7 851.936 5
 0 -12 -11 20214.3 1018.57 4
 0 -12 -12 853.308 282.772 4
 0 -12 -12 1199.65 247.797 5
 0 12 -13 10163.2 795.408 5
 0 -12 -13 11475.2 685.129 5
 0 -12 -14 12642.7 950.804 4
 0 12 -14 14354.7 998.814 5
 0 -12 -14 12777.5 814.51 5
 0 -12 -15 39242.9 1312.64 5
 0 12 -15 41248.4 1573.99 5
 0 -12 -16 1718.08 373.316 4
 0 12 -16 1512.96 352.382 5
 0 -12 -16 1118.76 252.944 5
 0 -12 -17 229.723 187.955 4
 0 12 -17 504.691 227.629 5
 0 12 -18 1580.07 325.275 5
 0 12 -19 1501.22 244.629 5
 0 -14 0 38888.2 587.315 2
 0 14 0 39572.4 796.26 1
 0 14 -1 296191 2652.4 1
 0 14 1 358691 1809.34 1
 0 -14 2 603.682 109.826 1
 0 14 -2 684.98 181.015 1
 0 14 -3 25943.8 1021.21 1
 0 -14 3 24666.1 706.751 1
 0 14 4 967.712 90.0658 1
 0 14 4 1103.25 67.4586 2
 0 -14 4 1908.18 246.542 1
 0 14 -4 1816.47 356.014 1
 0 14 5 156443 1288.37 2
 0 -14 5 154390 2191.74 1
 0 14 5 155584 1274.87 1
 0 14 6 24596.5 587.242 1
 0 -14 -7 3548.18 353.777 4
 0 -14 -7 2477.55 310.123 5
 0 -14 -8 21050.9 927.946 4
 0 -14 -8 20222.6 792.681 5
 0 -14 -9 119689 1895.53 5
 0 -14 -9 119078 2248.26 4
 0 -14 -10 26093.5 978.231 5
 0 -14 -10 25518.5 1153.79 4
 0 -14 -11 33630 1130.32 5
 0 -14 -11 34577.5 1370.91 4
 0 -14 -12 838.068 296.335 4
 0 -14 -12 971.458 253.663 5
 0 -14 -13 23856.2 1010.26 5
 0 -14 -13 23703.7 1228.29 4
 0 14 -14 3860.25 511.703 5
 0 -14 -14 4163.52 447.299 5
 0 -14 -14 3846.87 534.777 4
 0 14 -15 19514.3 1181.29 5
 0 -14 -15 19705.3 1104.79 4
 0 -14 -16 2278.93 411.687 4
 0 14 -16 2035.84 426.708 5
 0 -14 -17 6173.44 572.593 4
 0 14 -17 6675.9 611.591 5
 0 14 -18 4113.75 465.496 5
 0 14 -19 12650.3 659.5 5
 0 16 0 91294.1 1264.84 1
 0 -16 0 92083.2 996.544 2
 0 16 -1 137218 1890.77 1
 0 16 1 151314 1246.03 1
 0 16 -2 36348.2 1131.34 1
 0 16 -3 764.069 177.669 1
 0 -16 3 715.004 128.279 1
 0 -16 4 5378.73 380.04 1
 0 -16 5 146452 2144.27 1
 0 -16 -6 10621.2 588.317 4
 0 -16 -7 47864.9 1294.59 4
 0 -16 -8 45397.7 1373.95 4
 0 -16 -9 175760 2402.66 5
 0 -16 -9 172988 2797.95 4
 0 -16 -10 32485.8 1099.88 5
 0 -16 -10 32683.1 1338.94 4
 0 -16 -11 44394.7 1311.32 5
 0 -16 -11 44606.2 1608.12 4
 0 -16 -12 185.209 148.566 5
 0 -16 -12 331.293 226.247 4
 0 -16 -13 -1.74457 219.576 4
 0 16 -14 13160.8 938.29 5
 0 -16 -14 11592.9 907.274 4
 0 -16 -15 7814.17 730.989 4
 0 16 -15 9533.65 801.947 5
 0 -16 -16 1015.69 298.593 4
 0 16 -16 959.517 299.544 5
 0 16 -17 4535.96 525.726 5
 0 16 -18 14750.4 821.734 5
 0 -18 0 265744 1936.62 2
 0 -18 1 59605.2 897.516 2
 0 -18 3 59.6757 59.6984 1
 0 -18 4 1065.88 186.963 1
 0 -18 -5 7366.54 511.545 3
 0 -18 -5 7766.37 501.054 4
 0 -18 -6 1690.91 268.691 4
 0 -18 -7 9641.55 622.697 4
 0 -18 -8 67027.7 1717.17 4
 0 -18 -9 99583.1 2223.16 4
 0 -18 -10 94740 2270.67 4
 0 -18 -11 7119.25 686.191 4
 0 -18 -12 9753.98 818.148 4
 0 -18 -13 7521.87 754.399 4
 0 18 -14 14416.1 985.436 5
 0 -18 -14 12764.8 941.117 4
 0 -18 -15 6743.93 697.012 4
 0 18 -15 8054.18 724.494 5
 0 -18 -16 428.828 273.618 4
 0 18 -16 -50.2656 156.511 5
 0 18 -17 9851.5 726.861 5
 0 18 -18 22252.7 951.69 5
 0 -20 0 349063 2445.7 2
 0 -20 1 81179.2 1151.77 2
 0 -20 -3 53550.8 1356.22 3
 0 -20 -4 21063.7 869.709 3
 0 -20 -4 22294.1 828.303 4
 0 -20 -5 29440.2 990.639 4
 0 -20 -5 28721.7 1059.99 3
 0 -20 -6 39777.5 1214.53 4
 0 -20 -7 2800.81 371.706 4
 0 -20 -8 80527.4 1926.81 4
 0 -20 -9 28218.2 1232.92 4
 0 -20 -10 36929.2 1455.15 4
 0 -20 -11 32970.7 1471.97 4
 0 -20 -12 203.381 221.94 4
 0 -20 -13 1828.96 445.741 4
 0 -20 -14 20179.4 1183.4 4
 0 -20 -15 13040.6 975.835 4
 0 20 -15 14277.1 973.156 5
 0 20 -16 2805.91 420.615 5
 0 20 -17 1262.68 287.845 5
 0 20 -18 19236.1 859.346 5
 0 -22 0 421301 3822.89 3
 0 -22 -1 14529.1 732.602 3
 0 -22 1 13675.9 676.26 3
 0 -22 2 964.465 218.766 3
 0 -22 -2 815.017 191.01 3
 0 -22 -3 10004.2 576.214 4
 0 -22 3 10178.3 617.064 3
 0 -22 -3 10561.1 661.792 3
 0 -22 -4 406051 4074.1 3
 0 -22 -4 424633 3796.83 4
 0 -22 -5 12855.9 775.635 3
 0 -22 -5 12798.2 710.203 4
 0 -22 -6 136663 2319.34 4
 0 -22 -7 71.6787 148.621 4
 0 -22 -8 4053.93 467.451 4
 0 -22 -9 2163.94 405.409 4
 0 -22 -10 29299.5 1339.39 4
 0 -22 -11 4117.44 579.25 4
 0 -22 -12 5939.46 674.508 4
 0 -22 -13 3323.02 523.074 4
 0 -22 -14 42969.1 1701.16 4
 0 22 -15 10725.2 827.183 5
 0 -22 -15 9106.53 810.611 4
 0 22 -16 9232.12 740.37 5
 0 22 -17 -36.637 136.783 5
 0 -24 0 191856 2679.73 3
 0 -24 -1 815.946 243.487 3
 0 -24 1 761.009 198.146 3
 0 -24 -2 4520.71 450.306 3
 0 -24 2 4751.04 428.909 3
 0 -24 -3 1375.39 296.492 4
 0 -24 -3 1413.47 305.251 3
 0 -24 3 1666.02 314.449 3
 0 -24 -4 393152 3853.7 4
 0 -24 4 394602 4008.25 3
 0 -24 -4 384552 4181.14 3
 0 -24 -5 13103 807.323 4
 0 -24 -5 16331.3 959.96 3
 0 -24 -6 170701 2701.65 4
 0 -24 -7 4409.4 532.996 4
 0 -24 -8 1640.23 336.336 4
 0 -24 -9 2915.98 522.857 4
 0 -24 -10 2652.45 468.138 4
 0 -24 -11 1576.71 353.659 4
 0 -24 -12 19978.6 1194.22 4
 0 -24 -13 3039.93 545.557 4
 0 -24 -14 61656.7 1997.3 4
 0 24 -15 11389 825.02 5
 0 24 -16 18654.6 949.558 5
 0 24 -17 781.372 209.279 5
 0 -26 0 105544 2103.07 3
 0 -26 1 2062.3 363.435 3
 0 -26 -1 1046.44 236.135 3
 0 -26 -2 12779.4 768.54 3
 0 -26 2 12533.1 706.42 3
 0 -26 3 12975.5 742.923 3
 0 -26 -3 12869.4 805.395 3
 0 -26 -4 252920 3562.02 3
 0 -26 -4 263910 3324.99 4
 0 -26 4 257377 3336.55 3
 0 -26 -5 44415.3 1572.4 3
 0 -26 5 43484.4 1451.02 3
 0 -26 -5 42297.4 1380.71 4
 0 -26 -6 344595 4020.66 4
 0 -26 -7 8705.08 680.382 4
 0 -26 -8 26140.2 1214.2 4
 0 -26 -9 3506.05 529.84 4
 0 -26 -10 16743.8 1058.38 4
 0 -26 -11 86.2446 245.936 4
 0 -26 -12 29351.8 1433.42 4
 0 -26 -13 14511.9 1072.73 4
 0 26 -15 16665.8 948.277 5
 0 26 -16 24346 1024.95 5
 0 -26 16 20761.2 974.596 3
 0 -28 0 41937.9 1391.56 3
 0 -28 -1 9966.19 699.004 3
 0 -28 1 10440.5 677.921 3
 0 -28 2 1578.49 282.169 3
 0 -28 -2 1667.07 295.764 3
 0 -28 -3 20812.7 1033.88 3
 0 -28 3 20248.8 944.915 3
 0 -28 4 99003.4 2098.25 3
 0 -28 -4 105738 2392.29 3
 0 -28 5 63375.8 1781.57 3
 0 -28 -5 66616 1798.11 4
 0 -28 -5 68126.6 1987.87 3
 0 -28 -6 18452.6 979.655 4
 0 -28 6 18315.6 978.58 3
 0 -28 7 1731.66 322.699 3
 0 -28 -7 1694.48 363.331 4
 0 -28 -8 773.157 302.257 4
 0 -28 -9 21198.6 1170.32 4
 0 -28 -10 17689.6 1086.83 4
 0 -28 -11 215.091 271.063 4
 0 -28 -12 5881.14 633.287 4
 0 -28 14 78187.5 2065.85 3
 0 -28 15 16260.6 874.886 3
 0 28 -15 15456.4 891.729 5
 0 -28 16 3559.51 368.707 3
 0 28 -16 3759.38 403.427 5
 0 -30 0 49405 1588.34 3
 0 -30 1 42766.1 1434.85 3
 0 -30 -1 43673.3 1506.11 3
 0 -30 -2 926.15 252.598 3
 0 -30 2 848.224 235.358 3
 0 -30 3 11508.6 746.455 3
 0 -30 -3 11796.4 823.45 3
 0 -30 -4 38220.4 1492.25 3
 0 -30 4 36075.8 1307.54 3
 0 -30 5 3982.55 447.273 3
 0 -30 -5 3900.07 500.423 3
 0 -30 6 1848.09 308.686 3
 0 -30 7 6078.4 599.684 3
 0 -30 -7 5764.45 586.658 4
 0 -30 8 25662.3 1232.51 3
 0 -30 -8 27578.6 1287.24 4
 0 -30 9 56719.9 1827.01 3
 0 -30 -9 54686.9 1845.84 4
 0 -30 10 32368.3 1400.19 3
 0 -30 -10 32821 1462.92 4
 0 -30 11 10229.4 801.486 3
 0 -30 12 77.3805 180.712 3
 0 -30 13 17002.2 973.446 3
 0 -30 14 18253.9 949.709 3
 0 -30 15 17680.1 849.048 3
 0 30 -15 18341.2 876.109 5
 0 -32 0 51429 1702.96 3
 0 -32 -1 90854.6 2248.3 3
 0 -32 1 92684.2 2219.77 3
 0 -32 2 12619.4 811.409 3
 0 -32 -2 12965 860.938 3
 0 -32 3 174.442 159.369 3
 0 -32 -3 332.484 191.777 3
 0 -32 -4 5702.26 620.871 3
 0 -32 4 5644.61 547.014 3
 0 -32 5 6956.39 615.94 3
 0 -32 6 26941.5 1186.11 3
 0 -32 7 433.873 213.482 3
 0 -32 8 16061.8 952.392 3
 0 -32 9 123797 2636.08 3
 0 -32 10 47955.9 1677 3
 0 -32 11 39078 1462.36 3
 0 -32 12 2983.15 432.76 3
 0 -32 13 1704.5 302.496 3
 0 32 -14 2508.95 377.998 5
 0 -32 14 3402.47 382.225 3
 0 -32 15 5054.53 411.676 3
 0 32 -15 5989.52 454.985 5
 0 -34 0 12490.6 889.188 3
 0 -34 -1 175449 3224.8 3
 0 -34 1 177466 3175.22 3
 0 -34 2 1958.6 336.583 3
 0 -34 -2 1562.43 332.743 3
 0 -34 3 89617.8 2181.63 3
 0 -34 -3 89358 2376.99 3
 0 -34 -4 92.2413 175.922 3
 0 -34 4 201.126 173.187 3
 0 -34 5 116701 2478.82 3
 0 -34 6 1091.91 328.887 3
 0 -34 7 1501.21 315.92 3
 0 -34 8 9225.64 761.956 3
 0 -34 9 161594 2894.12 3
 0 -34 10 18613.7 1027.07 3
 0 -34 11 71809.3 1857.2 3
 0 -34 12 3455.63 421.869 3
 0 -34 13 729.987 201.673 3
 0 34 -14 46.0591 102.104 5
 0 -34 14 317.355 141.247 3
 0 -36 0 3748.78 610.684 3
 0 -36 1 183415 3282.89 3
 0 -36 -1 186806 3377.71 3
 0 -36 -2 5383.62 665.729 3
 0 -36 2 4830.16 592.186 3
 0 -36 3 546.212 231.015 3
 0 -36 -3 433.934 255.208 3
 0 -36 4 1429.77 368.593 3
 0 -36 -4 1603.94 425.665 3
 0 -36 5 19956.6 1031.05 3
 0 -36 6 1265.25 318.402 3
 0 -36 7 6920.47 606.843 3
 0 -36 8 4236.18 544.81 3
 0 -36 9 97200.5 2185.48 3
 0 -36 10 12936.6 853.764 3
 0 -36 11 48976.9 1458.71 3
 0 -36 12 1848.56 288.064 3
 0 -36 13 327.279 130.12 3
 0 -38 0 25004.5 1247.09 3
 0 -38 -1 214180 3627.97 3
 0 -38 1 207070 3506.63 3
 0 -38 -2 -11.7819 149.321 3
 0 -38 2 150.419 163.957 3
 0 -38 3 54559.3 1771.78 3
 0 -38 -3 55488.7 1902.55 3
 0 -38 4 8629.52 725.692 3
 0 -38 5 50575.3 1619.99 3
 0 -38 6 2236.08 350.1 3
 0 -38 7 141.791 135.557 3
 0 -38 8 3446.35 428.193 3
 0 -38 9 67847.1 1753.91 3
 0 -38 10 8878.76 630.428 3
 0 -38 11 13444 721.204 3
 0 -38 12 131.614 99.2049 3
 0 -40 0 45688.8 1655.73 3
 0 -40 -1 10557.2 814.98 3
 0 -40 1 9624.21 749.359 3
 0 -40 2 3765.82 468.851 3
 0 -40 -2 3545.66 480.872 3
 0 -40 3 32013.6 1328.91 3
 0 -40 -3 31633.1 1409.98 3
 0 -40 4 38474.1 1456.96 3
 0 -40 5 60352.6 1766.3 3
 0 -40 6 11156 743.974 3
 0 -40 7 71.0345 176.169 3
 0 -40 8 5695.53 518.679 3
 0 -40 9 16021.7 820.677 3
 0 -40 10 3120.24 360.207 3
 0 -40 11 -95.0097 91.4179 3
 0 -42 0 5720.75 572.615 3
 0 -42 -1 5166.19 540.333 3
 0 -42 1 5197.95 534.263 3
 0 -42 2 4360.78 488.446 3
 0 -42 -2 4342.29 508.519 3
 0 -42 3 26857.5 1173.87 3
 0 -42 4 66214.2 1793.18 3
 0 -42 5 56099.2 1638.82 3
 0 -42 6 42665 1396.69 3
 0 -42 7 4397.44 450.108 3
 0 -42 8 3495.56 383.413 3
 0 -42 9 2097.89 290.06 3
 0 -42 10 523.303 148.163 3
 0 -44 0 26499 1152.58 3
 0 -44 -1 1882.49 339.113 3
 0 -44 1 1674.19 310.739 3
 0 -44 2 4718.87 479.671 3
 0 -44 3 9029.42 651.122 3
 0 -44 4 68235.5 1730.1 3
 0 -44 5 23046.7 986.66 3
 0 -44 6 58420.2 1513.11 3
 0 -44 7 6131.79 476.524 3
 0 -44 8 165.303 109.85 3
 0 -46 0 46763.1 1433.62 3
 0 -46 1 1741.96 312.039 3
 0 -46 2 754.298 317.849 3
 0 -46 3 619.312 187.237 3
 0 -46 4 48406.4 1337.47 3
 0 -46 5 5705.69 462.523 3
 0 -46 6 47636.4 1243.04 3
 0 -48 2 21558.2 854.962 3
 1 -1 -2 274.925 67.6211 1
 1 1 -2 328.41 85.1773 1
 -1 1 2 357.589 73.2246 1
 1 1 -3 1402.41 179.708 1
 1 -1 -3 1579.27 172.188 1
 -1 1 3 1656.85 165.56 1
 -1 -1 3 1720.38 173.296 1
 1 1 4 4265.52 438.324 1
 -1 1 4 4455.06 377.231 1
 1 -1 -4 4519.81 440.934 1
 1 1 -4 5234.55 499.983 1
 1 -1 5 83427.1 1536.76 1
 -1 -1 5 87466.7 1484.17 1
 1 1 -5 83305.3 1684.88 1
 -1 1 5 89013.4 1452.27 1
 1 1 5 86698.4 1562.26 1
 1 1 6 387.648 117.008 1
 -1 1 6 647.546 148.29 1
 1 -1 6 725.997 176.946 1
 -1 -1 6 644.819 155.666 1
 -1 -1 7 59924.3 1461.76 1
 1 1 7 57457.7 1492.69 1
 1 -1 7 58075.2 1528.04 1
 -1 1 7 60839.2 1448.46 1
 -1 -1 8 26714.1 1064 1
 -1 1 8 24275.1 1046.27 1
 1 1 8 26388.5 1149.94 1
 1 -1 -9 314544 2966.14 5
 1 1 -9 307386 2998.38 5
 -1 -1 -9 307915 2929.57 5
 -1 1 -10 21198.9 872.151 4
 1 -1 -10 20284.9 865.383 4
 1 -1 -10 19460.3 868.306 5
 1 1 -10 22178.5 905.017 5
 -1 1 -10 20046.6 891.901 5
 -1 -1 -10 20439.1 870.468 4
 -1 -1 -10 19262.4 852.383 5
 1 -1 -11 151785 2377.82 5
 -1 1 -11 157217 2366.75 4
 -1 -1 -11 149652 2355.81 5
 -1 -1 -11 154757 2394.31 4
 -1 1 -11 150541 2385.13 5
 1 1 -11 152884 2402.71 5
 1 -1 -11 160772 2477.72 4
 -1 1 -12 7299.96 602.288 4
 1 -1 -12 7447.46 612.057 5
 1 -1 -12 6718.86 601.435 4
 1 1 -12 7167.45 614.96 5
 -1 -1 -12 7233.16 586.075 4
 -1 1 -12 7193.41 645.656 5
 -1 -1 -12 6836.92 625.956 5
 1 -1 -13 5504.93 537.621 5
 -1 1 -13 5617.42 536.408 5
 -1 -1 -13 4571.63 492.009 4
 -1 -1 -13 5257.67 523.154 5
 1 1 -13 5545.49 541.042 5
 1 1 -14 430.875 218.652 5
 1 -1 -14 121.006 135.617 5
 -1 -1 -14 -20.5827 146.633 5
 -1 1 -14 -87.808 139.702 5
 -1 1 -15 1182.69 280.217 5
 1 1 -15 791.342 243.547 5
 -1 -1 -15 815.621 259.724 5
 1 -1 -15 651.565 196.436 5
 1 1 -16 716.496 257.679 5
 -1 -1 -16 814.389 244.95 5
 1 -1 -16 836.74 260.915 5
 -1 1 -16 661.698 246.612 5
 -1 1 -17 16067.9 921.391 5
 1 1 -17 18700.5 961.903 5
 1 -1 -17 18553.4 972.85 5
 -1 -1 -17 19836.1 964.881 5
 1 1 -18 7997.41 609.54 5
 -1 -1 -18 6963.1 587.282 5
 -1 1 -18 9291.05 651.134 5
 1 -1 -18 8383.4 621.798 5
 -1 1 -19 20340.5 831.985 5
 1 -1 -19 18910.9 820.229 5
 -1 -1 -19 18569.4 791.119 5
 1 1 -19 20201.9 852.403 5
 1 3 0 114468 580.919 2
 -1 -3 0 114436 617.683 2
 1 -3 1 519406 2234.83 1
 1 3 -1 527411 1883.51 1
 -1 3 2 19145.6 365.897 1
 1 3 -2 19219.8 503.805 1
 1 -3 -2 18188.7 387.599 1
 1 3 -3 22268.9 654.926 1
 -1 3 3 23367.2 535.621 1
 1 3 -4 53135.8 1204.66 1
 1 3 4 53065.1 1098.96 1
 -1 3 4 55387.9 993.592 1
 -1 -3 5 196209 2231.13 1
 1 3 -5 190624 2589.97 1
 -1 3 5 199033 2099.7 1
 1 3 5 194881 2331.74 1
 -1 -3 6 25547.4 894.129 1
 1 3 6 23797.7 898.777 1
 1 -3 6 25509.8 951.365 1
 -1 3 6 25306.5 851.831 1
 1 -3 7 10469.5 668.106 1
 -1 3 7 10092.9 592.188 1
 1 3 7 10405.2 634.56 1
 -1 -3 7 10110.2 612.702 1
 1 3 8 55651.3 1631.69 1
 -1 3 8 55217.9 1474.42 1
 -1 -3 -9 242058 2564.51 5
 1 -3 -9 243893 2624.71 5
 -1 -3 -9 248062 2813.15 4
 -1 -3 -10 23420.6 882.184 5
 1 -3 -10 25076.6 948.866 4
 -1 -3 -10 24276.4 962.534 4
 1 3 -10 23058.1 949.757 5
 1 -3 -10 25273.7 912.245 5
 1 3 -11 43307.3 1323.43 5
 1 -3 -11 48757.1 1384.42 4
 -1 -3 -11 47534.7 1358.83 4
 1 -3 -11 44360.4 1281.64 5
 -1 3 -11 47064.5 1334.18 5
 -1 -3 -11 47356.7 1306.28 5
 1 -3 -12 758.979 251.112 4
 1 3 -12 958.229 256.76 5
 1 -3 -12 1065.85 249.653 5
 -1 -3 -12 1090.4 263.372 4
 -1 3 -12 1285.15 282.734 5
 -1 -3 -12 1019.45 243.327 5
 -1 3 -13 1005.68 233.66 5
 1 -3 -13 1070.01 273.042 4
 1 -3 -13 874.581 264.799 5
 -1 -3 -13 1310.43 295.835 4
 -1 -3 -13 937.343 240.604 5
 1 3 -13 857.856 253.135 5
 1 -3 -14 2516.39 396.726 4
 -1 3 -14 2840.22 408.341 5
 -1 -3 -14 2351.4 383.551 4
 1 3 -14 2962.77 433.083 5
 1 -3 -14 2890.98 395.205 5
 -1 -3 -14 2391.85 398.83 5
 -1 -3 -15 16281.2 901.796 4
 -1 3 -15 16309.3 951.932 5
 1 3 -15 15395.4 941.745 5
 -1 -3 -15 14708 862.284 5
 1 -3 -15 15240.9 867.288 5
 -1 3 -16 350.46 240.887 5
 1 -3 -16 81.1017 154.962 5
 -1 -3 -16 219.789 157.816 5
 1 3 -16 352.613 178.748 5
 1 3 -17 7931.57 651.425 5
 -1 3 -17 7749.58 649.288 5
 1 -3 -17 7903.63 636.261 5
 -1 -3 -17 8234.47 619.811 5
 -1 -3 -18 6863.83 536.711 5
 1 3 -18 8342.67 637.952 5
 -1 3 -18 7275.37 579.41 5
 1 -3 -18 7647.17 578.019 5
 1 3 -19 15417.5 743.695 5
 -1 3 -19 15239.7 750.355 5
 -1 -3 -19 13958.4 681.458 5
 1 -3 -19 15027.7 723.127 5
 1 -5 0 82985.8 578.634 1
 -1 -5 0 82669.9 583.414 2
 -1 -5 1 39387.5 508.187 1
 1 -5 1 39647 631.169 1
 1 5 1 38244.2 472.095 2
 -1 -5 2 4591.45 230.059 1
 1 5 -2 4674.35 273.852 1
 -1 5 2 4926.28 163.147 1
 1 -5 2 4490.19 263.043 1
 -1 5 3 4239.99 228.216 1
 1 5 -3 3956.08 304.123 1
 1 5 -4 82113.2 1555.89 1
 -1 5 4 82639.8 1147.01 1
 -1 -5 5 111389 1718.16 1
 1 5 5 110495 1736.19 1
 1 5 -5 107232 2006.31 1
 1 -5 5 104792 1775.1 1
 1 5 6 44629 1213.53 1
 -1 -5 6 46817.5 1220.68 1
 1 -5 6 45667.1 1300.07 1
 -1 5 6 45498.8 1104.03 1
 1 5 7 2093.44 290.504 1
 -1 -5 7 2305.66 312.428 1
 1 -5 7 2211.11 325.133 1
 -1 5 7 2319.85 288.687 1
 -1 5 8 46145.2 1302.16 1
 1 5 8 46194.9 1448.36 1
 1 -5 -9 135383 2143.83 4
 -1 -5 -9 144203 1974.25 5
 -1 -5 -9 142877 2177.2 4
 1 -5 -9 135161 1978.87 5
 -1 -5 -10 32741.4 1014.02 5
 -1 -5 -10 31968.8 1100.76 4
 1 -5 -10 33059.3 1117.05 4
 1 -5 -10 33027 1039.68 5
 -1 -5 -11 3238.67 358.698 5
 1 5 -11 2507.41 364.056 5
 1 -5 -11 3273.02 361.652 5
 1 -5 -11 3383.62 396.546 4
 -1 -5 -11 2840.51 371.492 4
 -1 5 -12 5128.41 518.606 5
 1 -5 -12 6075.51 547.75 4
 -1 -5 -12 5849.31 508.415 5
 1 5 -12 5501.08 503.909 5
 -1 -5 -12 5481.61 529.678 4
 1 -5 -12 4924.94 463.183 5
 1 5 -13 18855.1 1028.16 5
 1 -5 -13 21979.9 991.34 5
 -1 5 -13 21176.4 1038.86 5
 1 -5 -13 22316 1046.54 4
 -1 -5 -13 23371.1 1013.73 5
 -1 -5 -13 20501.7 1023.07 4
 1 -5 -14 27487.4 1194.61 4
 -1 5 -14 28742.4 1254.15 5
 -1 -5 -14 26842.3 1200.3 4
 1 5 -14 29324.3 1263.42 5
 1 -5 -14 26106.1 1131.31 5
 -1 -5 -14 27566.8 1138.1 5
 1 -5 -15 45131.3 1521.29 4
 -1 -5 -15 43072.6 1493.04 4
 -1 5 -15 45720.9 1594.52 5
 -1 -5 -15 45463.3 1467.48 5
 1 5 -15 43103.8 1584.21 5
 1 -5 -15 42972.7 1486.56 5
 1 -5 -16 2875.44 440.109 5
 -1 5 -16 3524.92 464.126 5
 -1 -5 -16 4015.53 465.08 5
 1 5 -16 4289.78 514.796 5
 -1 -5 -16 3601.56 435.258 4
 -1 -5 -17 296.053 147.432 5
 -1 5 -17 203.678 173.607 5
 1 -5 -17 439.081 179.774 5
 1 5 -17 328.284 189.111 5
 -1 -5 -18 4795.57 446.554 5
 -1 5 -18 6094.29 537.807 5
 1 5 -18 5373.2 535.39 5
 1 -5 -18 5211.93 476.692 5
 1 5 -19 7946.46 571.619 5
 -1 5 -19 9613.66 634.883 5
 1 7 0 23550.2 382.91 1
 1 -7 0 23529.5 324.548 1
 -1 -7 0 23407.6 345.951 2
 1 -7 1 247.485 71.2187 1
 1 7 1 164.122 36.1937 2
 1 7 -1 130.297 62.6604 1
 -1 -7 2 69748.7 905.142 1
 1 -7 2 68918.5 1038.14 1
 1 -7 3 42853.9 982.799 1
 1 7 -3 40983.9 1021.38 1
 -1 7 4 26524.7 612.677 1
 1 7 -4 25220.3 891.192 1
 1 -7 4 25376 818.802 1
 1 7 -5 93548.6 1939.64 1
 1 7 5 97532.4 1607.17 1
 -1 -7 5 95861.2 1598.61 1
 -1 7 5 101103 1394.28 1
 1 -7 5 98000 1797.47 1
 1 -7 6 125373 2188.17 1
 1 7 -6 122885 2490.87 1
 -1 -7 6 125427 2003.55 1
 -1 7 6 127754 1774.2 1
 1 7 6 123256 1974.19 1
 1 7 7 40260.3 1220.94 1
 -1 -7 7 39068.2 1202.3 1
 -1 7 7 40483.7 1089.23 1
 1 -7 7 39827.2 1334.74 1
 1 7 8 10482.6 672.674 1
 -1 7 8 9852.47 578.357 1
 1 -7 -9 8072.23 557.82 4
 1 -7 -9 8583.75 510.333 5
 -1 -7 -9 8904.74 497.161 5
 -1 -7 -9 8621.92 560.895 4
 1 -7 -10 26369.5 1076.27 4
 1 -7 -10 28240.9 972.586 5
 -1 -7 -10 30011.9 1090.93 4
 -1 -7 -10 29542.3 963.34 5
 -1 -7 -11 5876.79 459.857 5
 1 -7 -11 5565.36 469.643 5
 1 -7 -11 5325.53 504.252 4
 -1 -7 -11 5964.04 517.725 4
 -1 -7 -12 22796.7 1065.06 4
 1 -7 -12 23274.2 1065.57 4
 1 -7 -12 22404.2 944.751 5
 -1 7 -12 21471 1022.27 5
 1 7 -12 21913.7 1018.85 5
 -1 -7 -12 22684.2 917.086 5
 -1 -7 -13 40549.3 1324.65 5
 1 -7 -13 39895.8 1470.41 4
 -1 7 -13 38826.1 1466.41 5
 1 7 -13 37331.7 1407.87 5
 -1 -7 -14 80622.4 2092.73 4
 1 -7 -14 81367.9 2068.67 4
 -1 7 -14 87070.4 2185.45 5
 1 7 -14 81471.9 2142.62 5
 -1 -7 -14 84819.1 1961.17 5
 1 -7 -14 79850.9 1906.97 5
 1 -7 -15 52065.8 1656.15 5
 1 -7 -15 53362.6 1709.07 4
 -1 -7 -15 54365.9 1718.72 4
 -1 7 -15 54411.1 1782.72 5
 -1 -7 -15 59856.4 1728.58 5
 1 7 -15 59664.1 1864.96 5
 1 -7 -16 17316.2 952.027 4
 -1 7 -16 20966.1 1100.53 5
 -1 -7 -16 17471.2 954.168 4
 1 7 -16 19642.1 1077.47 5
 -1 -7 -16 17204.4 898.54 5
 1 -7 -16 17656.6 902.116 5
 -1 7 -17 294.42 203.031 5
 1 7 -17 249.317 200.785 5
 -1 -7 -17 104.066 104.876 5
 1 -7 -17 22.1051 117.028 5
 -1 7 -18 4349.72 465.409 5
 1 7 -18 3669.9 454.862 5
 1 -7 -18 3926.27 408.123 5
 -1 -7 -18 4064.46 402.92 5
 -1 7 -19 1144.96 238.153 5
 1 7 -19 1219.75 225.508 5
 1 -9 0 85519.9 639.355 1
 -1 -9 0 84514.9 738.12 2
 1 9 -1 91.8544 86.6294 1
 1 -9 1 66.7275 65.7808 1
 -1 -9 2 74521.8 968.392 1
 1 -9 2 75061.8 1119.41 1
 1 9 2 74764.5 724.667 2
 1 9 -3 44674.2 1097.52 1
 1 -9 3 45213.1 1000.03 1
 -1 -9 3 44506.9 878.936 1
 -1 -9 4 359024 2808.35 1
 1 9 -4 369567 3603.95 1
 1 -9 5 70229.6 1539.83 1
 -1 -9 5 68175.7 1375.04 1
 -1 9 5 74067.5 1125.7 1
 1 9 -5 67989.3 1752.1 1
 1 9 5 70233.9 1337.49 1
 1 -9 6 386409 3889.08 1
 1 9 -6 375281 4565.34 1
 -1 9 6 382308 2838.98 1
 -1 -9 6 379319 3510.75 1
 1 9 6 387606 3384.94 1
 -1 9 7 49501.1 1121.56 1
 1 9 7 48261.8 1290.53 1
 -1 9 8 4813.88 383.33 1
 1 9 8 5400.12 472.238 1
 1 -9 -8 5756.78 454.733 4
 -1 -9 -8 6663.66 471.978 4
 1 -9 -8 6004.91 412.881 5
 1 -9 -9 2096.13 314.602 4
 1 -9 -9 1835.58 249.1 5
 -1 -9 -9 2078.81 318.711 4
 -1 -9 -9 2363.11 276.682 5
 1 -9 -10 28918.5 1104.56 4
 1 -9 -10 28527.7 960.924 5
 -1 -9 -10 27694.9 947.858 5
 -1 -9 -10 31002.8 1132.19 4
 1 -9 -11 2462.89 318.782 5
 -1 -9 -11 2611.01 307.145 5
 -1 -9 -11 2604.16 391.481 4
 1 -9 -11 2406.65 392.911 4
 -1 -9 -12 15943.4 920.1 4
 1 -9 -12 15770.7 909.935 4
 -1 -9 -12 17535.6 804.459 5
 1 -9 -12 17037.6 814.618 5
 -1 -9 -13 21734.1 1012.58 5
 -1 9 -13 21581.5 1123.82 5
 1 9 -13 21028.4 1122.94 5
 1 -9 -13 21549.2 1056.12 5
 -1 9 -14 116888 2601.53 5
 1 -9 -14 115352 2520.19 4
 1 -9 -14 121938 2316.16 5
 1 9 -14 120918 2613.68 5
 -1 -9 -14 116323 2551.22 4
 -1 9 -15 39645 1586.32 5
 -1 -9 -15 37888.2 1483.05 4
 1 -9 -15 41439.8 1422.22 5
 1 -9 -15 35680.8 1449.3 4
 1 9 -15 34889.4 1471.99 5
 -1 -9 -15 43178.5 1403.94 5
 1 -9 -16 23290.8 1129.29 4
 -1 -9 -16 24298.3 1032.67 5
 1 -9 -16 23985.6 1046.35 5
 1 9 -16 26363.4 1243.92 5
 -1 -9 -16 22755.9 1114.15 4
 -1 -9 -17 -12.7787 161.99 4
 -1 -9 -17 167.585 131.398 5
 1 9 -17 74.281 143.558 5
 1 -9 -17 -87.9822 137.706 5
 -1 9 -17 -98.4884 166.09 5
 1 9 -18 94.5176 120.464 5
 -1 9 -18 -39.2838 115.052 5
 -1 9 -19 1391.2 209.906 5
 1 9 -19 4.52807 112.478 5
 -1 -11 0 180874 1220.13 2
 1 11 0 156429 1384.77 1
 1 11 -1 2025.87 232.929 1
 1 11 1 2329.24 148.245 1
 1 -11 1 2146.75 183.504 1
 1 -11 2 197.1 78.6418 1
 -1 -11 2 298.096 74.1284 1
 1 11 -3 3999.45 374.043 1
 1 -11 3 3822.82 293.765 1
 1 11 3 3937.94 196.024 2
 -1 -11 3 3867.33 268.43 1
 -1 11 4 187882 1202.66 1
 1 11 -4 190363 2757.76 1
 1 -11 4 184679 2255.19 1
 -1 11 5 18546.2 496.206 1
 1 -11 5 18579.6 837.009 1
 1 11 5 18493.9 675.581 1
 -1 -11 5 16398.6 717.998 1
 1 11 -5 18631.1 991.033 1
 1 11 -6 465767 5281.46 1
 1 -11 6 474850 4371.96 1
 1 11 6 444811 3368.93 1
 -1 -11 6 450973 3857.46 1
 -1 11 6 458536 2747.83 1
 -1 11 7 14272.3 554.301 1
 1 11 7 15234 714.66 1
 1 -11 -8 105.817 99.5698 5
 -1 -11 -8 125.168 79.189 5
 1 -11 -8 -46.6757 109.36 4
 -1 -11 -8 157.022 99.6752 4
 -1 -11 -9 8966.8 634.932 4
 -1 -11 -9 8152.02 545.243 5
 1 -11 -9 8332.36 575.401 5
 1 -11 -9 8670.52 623.511 4
 1 -11 -10 43868.4 1391.74 4
 1 -11 -10 42339.4 1218.34 5
 -1 -11 -10 44145.1 1400.03 4
 -1 -11 -10 41448.1 1216.65 5
 -1 -11 -11 957.07 288.002 4
 1 -11 -11 996.414 281.441 4
 1 -11 -11 546.652 198.406 5
 -1 -11 -11 939.269 203.018 5
 -1 -11 -12 4124.57 502.101 4
 -1 -11 -12 6372.32 491.894 5
 1 -11 -12 4343.39 523.336 4
 1 -11 -12 5881.57 487.49 5
 -1 11 -13 3558.72 544.532 5
 1 -11 -13 4113.44 465.641 5
 1 11 -13 3443.71 527.52 5
 -1 -11 -13 4165.84 454.348 5
 1 -11 -13 2477.16 404.278 4
 -1 -11 -13 2784.7 467.211 4
 1 -11 -14 85448 2225.48 4
 1 11 -14 87299.8 2257.27 5
 -1 -11 -14 83983.2 2251.66 4
 -1 11 -14 84494.9 2232.18 5
 -1 -11 -14 90256.9 1941.54 5
 1 -11 -14 88754.1 1954.84 5
 -1 -11 -15 11984 907.991 4
 -1 11 -15 13551.6 987.12 5
 -1 -11 -15 13091.1 805.907 5
 1 -11 -15 10638.6 864.308 4
 1 11 -15 12993.5 939.861 5
 1 11 -16 11409.2 866.436 5
 1 -11 -16 9301.2 732.832 4
 -1 11 -16 11025.7 815.839 5
 -1 -11 -16 9631.2 655.072 5
 1 -11 -16 9454.96 672.889 5
 -1 -11 -16 8060.31 695.716 4
 1 11 -17 345.436 165.792 5
 -1 -11 -17 444.401 187.104 4
 -1 11 -17 464.483 221.534 5
 1 11 -18 253.404 158.111 5
 -1 11 -18 160.517 153.539 5
 1 11 -19 19.6476 111.193 5
 -1 11 -19 187.231 119.814 5
 1 13 0 489597 2847.76 1
 -1 -13 0 550171 2348.36 2
 1 -13 1 5225.69 240.331 1
 1 13 1 5972.82 255.54 1
 1 13 -2 513.772 160.177 1
 -1 -13 2 462.561 89.5314 1
 1 13 2 398.779 60.2681 1
 1 -13 2 402.637 103.846 1
 1 13 -3 527.412 209.496 1
 1 -13 3 440.889 120.472 1
 1 13 3 440.993 63.1775 2
 -1 -13 3 442.49 115.306 1
 1 13 4 77793.1 937.097 2
 -1 -13 4 73674.1 1318.28 1
 1 -13 4 74178.4 1430.22 1
 1 13 -4 78302.7 1873.61 1
 1 13 5 4615.73 327.069 1
 -1 13 5 3678.27 177.464 1
 -1 -13 5 5182.16 413.852 1
 1 -13 5 5129.6 455.833 1
 1 13 -5 5159.95 584.528 1
 1 13 6 369083 2857.56 1
 -1 13 6 365112 2028.25 1
 -1 -13 -7 764.497 201.374 4
 1 -13 -7 1130.59 193.568 5
 1 -13 -7 810.154 213.459 4
 -1 -13 -8 71100.5 1335.45 5
 1 -13 -8 67013.1 1566.54 4
 1 -13 -8 71572.1 1384.25 5
 -1 -13 -8 66966.2 1569.31 4
 1 -13 -9 10388.9 729.501 4
 -1 -13 -9 10058.6 730.511 4
 -1 -13 -9 10448.6 606.203 5
 1 -13 -9 9699.42 619.234 5
 -1 -13 -10 74694.3 1555.49 5
 -1 -13 -10 74003.9 1897.47 4
 1 -13 -10 79244 1919.6 4
 1 -13 -10 74954.7 1593.25 5
 -1 -13 -11 1855.62 303.992 5
 1 -13 -11 1989.51 374.855 4
 -1 -13 -11 1093.13 283.967 4
 1 -13 -11 1516.98 307.24 5
 1 -13 -12 202.587 236.077 4
 -1 -13 -12 231.96 137.807 5
 -1 -13 -12 230.576 250.524 4
 1 -13 -12 54.4563 126.821 5
 1 13 -13 1125.36 367.108 5
 -1 -13 -13 1923.76 463.027 4
 -1 -13 -13 1833.57 314.158 5
 1 -13 -13 1533.26 320.396 5
 1 -13 -13 1440.05 381.229 4
 1 -13 -14 23913.2 1035.94 5
 -1 -13 -14 24921.1 1031.53 5
 -1 13 -14 22270.2 1162.93 5
 1 -13 -14 23075.7 1214.03 4
 -1 -13 -14 23524 1207.36 4
 1 13 -14 23260.7 1174.37 5
 -1 -13 -15 4946.51 498.432 5
 1 13 -15 6677.27 672.683 5
 -1 -13 -15 4802.23 601.233 4
 1 -13 -15 5073.87 606.008 4
 1 -13 -15 5343.52 526.603 5
 -1 13 -15 5184.64 630.953 5
 1 -13 -16 3692.14 476.117 4
 -1 13 -16 4059.8 548.376 5
 1 13 -16 4523.97 546.648 5
 -1 -13 -16 4017.92 510.25 4
 -1 13 -17 408.916 189.584 5
 1 13 -17 252.927 224.538 5
 -1 -13 -17 551.77 215.977 4
 1 13 -18 4459.4 463.988 5
 -1 13 -18 4407.6 469.259 5
 1 13 -19 1104.42 218.883 5
 -1 13 -19 1432.54 254.703 5
 -1 -15 0 202899 1613.05 2
 1 -15 0 199401 1222.96 2
 1 15 -1 37962.6 992.117 1
 1 15 1 40609 749.448 1
 1 15 2 32246.1 533.533 1
 1 15 -2 31156.2 1014.74 1
 1 15 3 1524.72 105.162 1
 -1 -15 3 1686.01 196.655 1
 1 -15 3 1611.25 208.884 1
 1 15 -3 1781.65 297.766 1
 -1 -15 4 41932.9 1003.81 1
 1 15 4 43077.6 519.001 2
 1 -15 4 41864.5 1075.76 1
 1 15 4 41125.7 707 1
 -1 -15 5 9193.63 541.885 1
 1 -15 5 9612.63 585.253 1
 1 15 5 8057.96 336.193 1
 1 15 5 9041.66 320.598 2
 1 15 -5 9150.58 800.954 1
 1 -15 -6 23288.2 849.608 4
 -1 -15 -6 21384.5 811.647 4
 1 -15 -7 2785.62 345.544 4
 1 -15 -7 2979.7 309.748 5
 -1 -15 -7 2813 340.47 4
 -1 -15 -7 2960.95 278.141 5
 1 -15 -8 103501 2019.46 4
 -1 -15 -8 105495 2015.44 4
 1 -15 -8 107324 1789.29 5
 -1 -15 -8 110065 1749.43 5
 -1 -15 -9 35212.3 1283.52 4
 1 -15 -9 33777.4 1090.43 5
 -1 -15 -9 36141.9 1072.11 5
 1 -15 -9 34501.6 1272.14 4
 1 -15 -10 84397.8 1728.48 5
 -1 -15 -10 86679.8 1714.97 5
 1 -15 -10 82919.5 2040.14 4
 -1 -15 -10 86059.9 2063.43 4
 -1 -15 -11 8347.77 585.687 5
 1 -15 -11 8879.7 764.139 4
 -1 -15 -11 7298.21 688.472 4
 1 -15 -11 8873.57 609.184 5
 1 -15 -12 982.483 316.026 4
 1 -15 -12 1412.25 285.506 5
 -1 -15 -12 1019.96 235.125 5
 -1 -15 -12 505.303 228.458 4
 1 -15 -13 535.74 225.867 5
 -1 -15 -13 183.251 113.116 5
 -1 -15 -13 649.005 306.046 4
 1 -15 -13 594.221 249.237 4
 -1 15 -14 13760.6 954.115 5
 1 -15 -14 12296 931.003 4
 -1 -15 -14 12189.1 920.876 4
 1 15 -14 11866.1 929.518 5
 1 15 -15 4419.57 552.964 5
 1 -15 -15 4091.53 569.521 4
 -1 -15 -15 4145.45 565.751 4
 -1 15 -15 5206.09 603.313 5
 1 15 -16 136.521 159.74 5
 1 -15 -16 -55.738 189.526 4
 -1 15 -16 185.801 201.349 5
 -1 -15 -16 445.079 250.344 4
 -1 -15 -17 2662.51 407.467 4
 -1 15 -17 3091.55 455.313 5
 1 15 -17 3290.28 467.322 5
 -1 15 -18 17837.2 893.415 5
 1 15 -18 16226.1 867.636 5
 1 -17 0 165752 1239.03 2
 1 17 0 170973 1912.63 1
 -1 -17 0 168080 1645.92 2
 1 17 1 56622.2 916.273 1
 1 17 -1 57303.2 1306.6 1
 -1 -17 1 54790.9 895.471 2
 1 17 -2 17086.2 808.961 1
 1 17 2 16538.7 397.53 1
 1 -17 2 15276.3 516.517 1
 1 -17 3 2242.21 217.931 1
 1 17 3 1629.59 100.498 1
 1 17 -3 2481.36 350.522 1
 1 -17 4 10950.2 561.521 1
 -1 -17 4 11527.1 548.459 1
 1 17 -4 12045.6 832.422 1
 1 -17 -5 1606.87 233.329 4
 1 -17 5 1382.02 234.997 1
 1 -17 -5 1106.21 211.214 3
 -1 -17 -6 846.623 190.56 4
 1 -17 -6 1019.37 213.707 4
 -1 -17 -7 27873.7 1013.49 4
 1 -17 -7 27859.6 1027.45 4
 1 -17 -8 77082.7 1822.07 4
 -1 -17 -8 80850 1822.6 4
 -1 -17 -9 83983 1990.06 4
 1 -17 -9 83376.6 1996.29 4
 -1 -17 -10 86157.6 2128.17 4
 1 -17 -10 85237.1 2146.85 4
 1 -17 -11 21113.7 1128.6 4
 -1 -17 -11 20719.4 1127.05 4
 1 -17 -12 3961.6 580.762 4
 -1 -17 -12 3810.72 535.102 4
 1 -17 -13 871.452 318.75 4
 -1 -17 -13 881.68 297.899 4
 -1 17 -14 9892.08 816.753 5
 1 -17 -14 9292.23 826.568 4
 1 17 -14 8969.21 757.628 5
 -1 -17 -14 10434.4 853.492 4
 1 17 -15 3534.63 508.883 5
 1 -17 -15 3732.87 551.394 4
 -1 17 -15 3894.37 512.809 5
 -1 -17 -15 3423.67 524.911 4
 -1 -17 -16 163.117 222.715 4
 -1 17 -16 -13.6957 197.161 5
 1 -17 -16 -223.82 210.831 4
 1 17 -16 53.2257 149.23 5
 -1 -17 -17 6821.08 610.298 4
 1 17 -17 8578.2 685.101 5
 -1 17 -17 8161.35 684.638 5
 -1 17 -18 20632.6 949.152 5
 1 17 -18 20217.2 923.135 5
 1 19 0 117105 1641.89 1
 -1 -19 0 119125 1530.33 2
 1 -19 0 116677 1180.05 2
 1 -19 1 66336.6 914.855 2
 1 19 1 64190.8 977.647 1
 -1 -19 1 69466.1 1112.33 2
 1 19 -1 70107.5 1510.65 1
 1 19 2 117.265 40.088 1
 -1 -19 2 99.432 54.0166 2
 1 19 -3 9575.03 720.612 1
 1 -19 3 8823.25 453.818 1
 1 -19 -4 4047.54 394.621 3
 1 19 -4 5245.9 611.796 1
 1 -19 4 4183.84 335.89 1
 1 -19 -5 2960.87 332.072 4
 -1 -19 -5 2723.06 321.521 3
 -1 -19 -5 3088.28 330.153 4
 1 -19 -5 2961.31 360.008 3
 -1 -19 -6 2901.84 355.395 4
 1 -19 -6 2911.2 362.134 4
 1 -19 -7 8402.11 581.87 4
 -1 -19 -7 8797.39 596.864 4
 1 -19 -8 35071.4 1264.82 4
 -1 -19 -8 36233 1276.74 4
 1 -19 -9 93745.6 2156.89 4
 -1 -19 -9 94989.9 2178.89 4
 -1 -19 -10 32351.4 1371.53 4
 1 -19 -10 33733.6 1381.5 4
 -1 -19 -11 23964.4 1230.31 4
 1 -19 -11 22597 1192.5 4
 1 -19 -12 704.097 291.525 4
 -1 -19 -12 548.742 274.238 4
 1 -19 -13 2694.4 480.11 4
 -1 -19 -13 2474.72 459.578 4
 1 -19 -14 5456.82 661.487 4
 -1 -19 -14 5778.79 663.22 4
 1 19 -14 4916.7 586.973 5
 -1 19 -15 7054.15 700.148 5
 1 -19 -15 6300.5 689.695 4
 -1 -19 -15 6791.84 694.383 4
 1 19 -15 8170.53 717.664 5
 -1 19 -16 430.381 224.993 5
 1 19 -16 434.781 217.782 5
 -1 -19 -16 83.5405 172.532 4
 -1 19 -17 9100.13 681.309 5
 1 19 -17 8136.48 667.197 5
 1 19 -18 12310.8 721.516 5
 -1 19 -18 13174.6 717.689 5
 1 -21 0 49786.1 1276.96 3
 1 21 0 42639.5 988.705 1
 1 -21 1 135089 2060.84 3
 1 -21 -1 138464 2178.25 3
 -1 -21 1 140065 1720.48 2
 -1 -21 2 114.391 74.6811 2
 -1 -21 2 116.869 109.12 3
 1 -21 2 117.289 114.147 3
 -1 -21 -2 71.7869 99.0173 3
 1 -21 -2 162.402 101.98 3
 1 21 -2 132.302 158.753 1
 1 -21 -3 86450.5 1805.91 3
 -1 -21 3 90671.4 1784.33 3
 -1 -21 -3 86233.7 1717.14 3
 1 -21 3 89869.4 1770.87 3
 1 -21 -4 22972.2 883.485 4
 1 -21 -4 22697.1 966.077 3
 1 -21 4 20940.1 765.566 1
 -1 -21 -4 23563.2 936.574 3
 -1 -21 -4 23813.9 868.513 4
 1 -21 -5 72944.7 1772.32 3
 -1 -21 -5 74910.2 1592.94 4
 -1 -21 -5 69810.9 1644.74 3
 1 -21 -5 74262.8 1630.75 4
 -1 -21 -6 8238.21 588.317 4
 1 -21 -6 8349.82 604.4 4
 -1 -21 -7 6421.5 528.408 4
 1 -21 -7 6660.64 552.066 4
 -1 -21 -8 2561.7 404.551 4
 1 -21 -8 2867 416.633 4
 1 -21 -9 37832.5 1435.61 4
 -1 -21 -9 38738.9 1426.17 4
 1 -21 -10 6552.14 685.832 4
 -1 -21 -10 6371.13 648.582 4
 1 -21 -11 16937.3 1064.42 4
 -1 -21 -11 16306.2 1028.36 4
 -1 -21 -12 -31.3289 237.535 4
 1 -21 -12 134.047 235.839 4
 -1 -21 -13 5893.46 661.222 4
 1 -21 -13 5950.24 657.242 4
 1 21 -14 8911.51 793.478 5
 -1 -21 -14 8272.61 795.465 4
 1 -21 -14 8837.25 843.555 4
 -1 21 -15 27361.5 1295.8 5
 -1 -21 -15 23313.4 1239.69 4
 1 -21 -15 24294.3 1263.31 4
 1 21 -15 26766 1246.75 5
 -1 -21 -16 1657.92 364.486 4
 1 21 -16 1050.04 323.284 5
 -1 21 -16 1686.26 353.153 5
 -1 21 -17 1906.4 326.445 5
 1 21 -17 2168.49 331.768 5
 1 21 -18 2373.9 311.976 5
 1 -23 0 1738.68 308.911 3
 -1 -23 0 1790.52 294.242 3
 1 -23 -1 104453 2023.57 3
 -1 -23 -1 105933 1973.91 3
 -1 -23 1 103485 1884.92 3
 1 -23 1 103581 1908.96 3
 -1 -23 2 -16.5486 134.932 3
 1 -23 2 83.4975 102.527 3
 1 -23 -2 177.735 128.974 3
 -1 -23 -2 52.1786 92.366 3
 -1 -23 -3 143343 2361.94 3
 1 -23 -3 141019 2473.55 3
 -1 -23 -3 143901 2174.89 4
 1 -23 3 140623 2294.39 3
 1 -23 -3 145498 2293.4 4
 -1 -23 3 145426 2337.19 3
 1 -23 4 15694.9 845.694 3
 -1 -23 -4 15805 769.759 4
 1 -23 -4 14815.9 812.106 4
 -1 -23 -4 16990.4 861.881 3
 1 -23 -4 17552.1 915.239 3
 -1 -23 -5 255242 3326.31 3
 1 -23 -5 250106 3464.25 3
 1 -23 -5 262125 3226.21 4
 -1 -23 -6 6878.02 568.29 4
 1 -23 -6 7016.54 594.143 4
 1 -23 -7 36593.5 1318.2 4
 -1 -23 -7 38248.3 1313.45 4
 1 -23 -8 -361.817 247.574 4
 -1 -23 -8 172.296 176.745 4
 -1 -23 -9 25201.5 1189.04 4
 1 -23 -9 24994.7 1195.63 4
 1 -23 -10 1004.83 390.604 4
 -1 -23 -10 1027.59 368.455 4
 -1 -23 -11 137.402 228.377 4
 1 -23 -11 -147.112 249.544 4
 1 -23 -12 39.4247 240.921 4
 -1 -23 -12 546.029 300.344 4
 1 -23 -13 14078.9 1028.78 4
 -1 -23 -13 14216.3 975.573 4
 -1 -23 -14 9416.47 850.989 4
 1 -23 -14 9193.19 853.496 4
 1 23 -15 42241.3 1509.53 5
 -1 23 -15 43776.5 1592.91 5
 -1 -23 -15 40294.4 1554.12 4
 1 23 -16 2873.48 433.135 5
 -1 23 -16 2382.11 425.661 5
 -1 23 -17 717.842 177.715 5
 1 23 -17 935.635 217.11 5
 -1 -25 0 1966.19 303.587 3
 1 -25 0 1847.07 303.281 3
 1 -25 -1 31274 1173.39 3
 -1 -25 -1 30816.8 1127.49 3
 1 -25 1 30174.8 1080.31 3
 -1 -25 1 30507.5 1081.19 3
 1 -25 2 189.326 138.143 3
 -1 -25 2 131.97 112.638 3
 -1 -25 -2 32.5605 98.1397 3
 1 -25 -2 120.852 118.425 3
 1 -25 -3 132218 2487.68 3
 1 -25 3 124503 2206.92 3
 -1 -25 -3 123040 2144.48 4
 -1 -25 -3 126808 2334.56 3
 -1 -25 3 131192 2263.75 3
 1 -25 -4 13607.6 784.112 4
 -1 -25 4 14818.5 852.876 3
 1 -25 4 14167.4 823.303 3
 -1 -25 -4 13701.8 763.197 4
 1 -25 -4 13838.2 915.109 3
 -1 -25 -4 14172.1 859.353 3
 1 -25 5 356554 4013.14 3
 1 -25 -5 377351 4042.56 4
 -1 -25 -5 377314 3915.51 4
 -1 -25 5 364759 4055.88 3
 1 -25 -5 365391 4391.02 3
 -1 -25 -5 364138 4149.4 3
 1 -25 -6 16215.1 921.568 4
 -1 -25 -6 16987 910.804 4
 -1 -25 -7 55845.1 1634.3 4
 1 -25 -7 54412.2 1662.62 4
 1 -25 -8 383.057 242.22 4
 -1 -25 -8 378.842 230.403 4
 -1 -25 -9 19052.5 1057.45 4
 1 -25 -9 18940.9 1079.11 4
 1 -25 -10 218.122 228.265 4
 -1 -25 -10 441.269 285.853 4
 -1 -25 -11 2668.59 438.727 4
 1 -25 -11 2522.53 489.815 4
 1 -25 -12 3912.1 636.419 4
 -1 -25 -12 3768.99 601.358 4
 1 -25 -13 40708.6 1665.23 4
 -1 -25 -13 40660.5 1641 4
 -1 -25 -14 7676.9 781.206 4
 1 25 -15 50447.7 1599.26 5
 -1 25 -15 51978.7 1678.21 5
 1 25 -16 4694.74 520.46 5
 -1 25 -16 4843.22 515.023 5
 -1 25 -17 2684.03 329.02 5
 -1 -25 17 1963.09 281.491 3
 1 -25 17 2124.31 290.004 3
 1 25 -17 2408.46 312.056 5
 -1 -27 0 6896.75 537.677 3
 1 -27 0 6905.95 565.367 3
 -1 -27 -1 6740.99 563.337 3
 1 -27 -1 6827.91 576.741 3
 -1 -27 1 6420.3 527.46 3
 1 -27 1 6445.95 534.3 3
 1 -27 -2 2496.32 358.49 3
 1 -27 2 2021.21 302.331 3
 -1 -27 -2 2203.96 328.877 3
 -1 -27 2 2361 330.084 3
 1 -27 3 75196.6 1776.6 3
 -1 -27 3 76905.2 1786.31 3
 1 -27 -3 79737.2 2010.71 3
 -1 -27 -3 74735.5 1755 4
 -1 -27 -3 76967.6 1910.39 3
 -1 -27 -4 30978.6 1171.18 4
 -1 -27 4 32921.2 1223.81 3
 1 -27 4 31370.7 1186.43 3
 -1 -27 -4 32607.7 1284.97 3
 1 -27 -4 33017.4 1366.84 3
 -1 -27 -5 182643 3062.53 3
 1 -27 -5 189313 3307.96 3
 -1 -27 -5 182559 2850.95 4
 -1 -27 5 174977 2889.47 3
 1 -27 -5 179499 2907.13 4
 1 -27 6 37287.9 1386.09 3
 1 -27 -6 38162.3 1402.95 4
 -1 -27 6 39759.8 1430.83 3
 -1 -27 -6 38247.5 1354.21 4
 1 -27 -7 6375.54 622.976 4
 -1 -27 -7 6557.75 606.768 4
 -1 -27 -8 2235.73 392.173 4
 1 -27 -8 2397.96 443.985 4
 1 -27 -9 15090 1001.26 4
 -1 -27 -9 15073.8 958.03 4
 -1 -27 -10 1413.78 372.817 4
 1 -27 -10 1945.48 428.016 4
 1 -27 -11 919.334 342.77 4
 -1 -27 -11 771.418 287.79 4
 1 -27 -12 8726.51 819.449 4
 -1 -27 -12 7791.99 750.382 4
 -1 -27 -13 49822.7 1775.93 4
 1 27 -14 20002.7 1073.65 5
 -1 27 -15 36790.7 1331.77 5
 1 -27 15 32928.8 1288.34 3
 1 27 -15 34963.1 1302.11 5
 -1 -27 16 4802.78 457.735 3
 1 -27 16 5243.03 478.325 3
 -1 27 -16 5103.8 469.914 5
 1 27 -16 5741.89 501.975 5
 -1 -29 0 25045.8 1094.03 3
 1 -29 0 24349.1 1101.82 3
 1 -29 1 17737.1 917.976 3
 -1 -29 1 17927.5 909.897 3
 -1 -29 -1 18360.1 932.691 3
 1 -29 -1 17960.5 962.027 3
 1 -29 -2 97.1994 165.033 3
 1 -29 2 139.957 114.744 3
 -1 -29 2 253.051 192.973 3
 -1 -29 -2 102.863 142.58 3
 -1 -29 3 25750.2 1081.28 3
 1 -29 -3 26942.3 1227.77 3
 -1 -29 -3 25737.9 1151.77 3
 1 -29 3 25814.9 1090.44 3
 -1 -29 4 37854 1327.96 3
 1 -29 4 37261.8 1315.39 3
 -1 -29 -4 38497.7 1451.77 3
 1 -29 -4 40760.5 1555.84 3
 1 -29 5 37782.8 1359.32 3
 -1 -29 -5 28036.1 1173.76 4
 -1 -29 -5 38989.4 1480.1 3
 -1 -29 5 29031.2 1188.55 3
 1 -29 -5 31449.1 1401.9 3
 -1 -29 6 7399.6 630.176 3
 1 -29 6 9048.79 689.793 3
 -1 -29 -6 7256.41 625.746 4
 -1 -29 7 1125.91 271.392 3
 1 -29 7 1694.55 396.815 3
 -1 -29 -7 1772.88 375.428 4
 1 -29 8 5876.94 600.043 3
 -1 -29 8 5854.32 583.761 3
 -1 -29 -8 6672.39 663.046 4
 1 -29 -8 6161.91 641.798 4
 1 -29 9 35567.3 1463.5 3
 -1 -29 9 34674 1448.8 3
 -1 -29 -9 34920.3 1471.92 4
 1 -29 -9 36561.4 1517.61 4
 1 -29 10 12350.3 889.17 3
 -1 -29 -10 12450.8 935.103 4
 1 -29 11 4096.98 556.315 3
 -1 -29 -11 3413.82 505.029 4
 1 -29 12 1673.73 354.188 3
 -1 -29 12 2727.79 447.471 3
 -1 -29 -12 1685.95 385.372 4
 -1 -29 13 20684.1 1083.12 3
 1 -29 13 20233.4 1075.12 3
 -1 -29 14 35097.4 1331.9 3
 1 -29 14 35510.2 1365.77 3
 1 29 -14 37028.3 1345.97 5
 1 29 -15 21321.5 946.612 5
 -1 29 -15 20484.3 947.908 5
 -1 -29 15 17870.3 869.508 3
 1 -29 15 19748.9 936.257 3
 -1 29 -16 1099.61 228.08 5
 -1 -29 16 836.325 187.814 3
 1 -29 16 547.114 149.578 3
 1 29 -16 708.489 164.865 5
 -1 -31 0 117040 2475.94 3
 1 -31 0 117698 2510.34 3
 -1 -31 -1 30842.8 1278.4 3
 1 -31 -1 31395.4 1318.12 3
 -1 -31 1 32275.7 1286.89 3
 1 -31 1 30948.1 1267.32 3
 -1 -31 2 4107.82 449.641 3
 1 -31 2 5436.62 529.285 3
 -1 -31 -2 5883.63 581.294 3
 1 -31 -2 4488.21 480.122 3
 -1 -31 -3 752.231 253.868 3
 1 -31 -3 714.453 247.62 3
 -1 -31 3 689.895 204.277 3
 1 -31 3 399.64 172.285 3
 1 -31 4 3759.3 447.553 3
 -1 -31 4 3280.48 411.413 3
 1 -31 -4 3889.11 515.279 3
 -1 -31 -4 2993.03 425.271 3
 1 -31 -5 237.195 162.777 3
 1 -31 5 417.893 226.154 3
 -1 -31 5 43.3208 122.892 3
 1 -31 6 21177.8 1055.79 3
 -1 -31 6 16822.1 926.539 3
 -1 -31 -7 518.58 228.527 4
 1 -31 7 248.363 150.067 3
 -1 -31 7 401.798 223.374 3
 -1 -31 8 33297.6 1359.97 3
 1 -31 8 31206.4 1338.12 3
 -1 -31 -8 33525.6 1397.73 4
 1 -31 9 37240.2 1483.82 3
 -1 -31 -9 36221.8 1508.97 4
 -1 -31 9 36465.4 1465.38 3
 1 -31 10 55435.9 1806.79 3
 -1 -31 -10 55210 1840.12 4
 -1 -31 10 57080 1822.05 3
 1 -31 11 14524.1 955.364 3
 -1 -31 11 14794.4 934.692 3
 1 -31 12 457.829 191.232 3
 -1 -31 12 705.918 247.302 3
 -1 -31 13 1833.81 336.073 3
 1 -31 13 2339.3 360.384 3
 -1 -31 14 16943.1 869.079 3
 1 -31 14 17159.6 866.604 3
 1 31 -14 17200.5 858.714 5
 1 31 -15 3221.77 376.599 5
 -1 31 -15 3192.45 371.809 5
 1 -31 15 2822.42 332.484 3
 -1 -31 15 2628.39 313.985 3
 -1 -33 0 180558 3165.07 3
 1 -33 0 179208 3208.2 3
 1 -33 1 19966.7 1079.69 3
 -1 -33 1 20348.3 1072.18 3
 -1 -33 -1 20053.5 1074.42 3
 1 -33 -1 20683.1 1117.91 3
 -1 -33 2 40311.4 1456.59 3
 -1 -33 -2 41350.7 1531.38 3
 1 -33 -2 42361.6 1590.19 3
 1 -33 2 40305.8 1470.56 3
 -1 -33 -3 6805.42 634.7 3
 1 -33 -3 7097.98 701.009 3
 -1 -33 3 6701.96 599.29 3
 1 -33 3 6231.04 594.555 3
 -1 -33 4 2483.25 359.825 3
 1 -33 4 3478.5 442.354 3
 -1 -33 -4 2551.61 413.015 3
 1 -33 -4 2977.39 469.189 3
 1 -33 5 4242.12 481.23 3
 -1 -33 5 4250.04 480.937 3
 1 -33 6 29361 1237.24 3
 -1 -33 6 30951.5 1256.01 3
 1 -33 7 1496.44 285.306 3
 -1 -33 7 1820.26 317.931 3
 1 -33 8 63401.3 1834.67 3
 -1 -33 8 63238.9 1823.49 3
 1 -33 9 28560.7 1292.48 3
 -1 -33 9 27933.1 1242.85 3
 1 -33 10 105871 2371.63 3
 -1 -33 10 105868 2353.29 3
 -1 -33 11 15012.3 912.471 3
 1 -33 11 13951.7 877.805 3
 -1 -33 12 11318.1 734.911 3
 1 -33 12 11596.3 736.486 3
 1 -33 13 149.341 136.581 3
 -1 -33 13 132.668 139.64 3
 -1 -33 14 1674.89 256.13 3
 -1 33 -14 1524.88 273.137 5
 1 -33 14 1939.5 265.455 3
 1 33 -14 1672.28 280.131 5
 -1 -35 0 269948 3940.33 3
 1 -35 0 271854 4048.78 3
 -1 -35 1 2782.96 522.697 3
 1 -35 -1 3383.02 545.992 3
 1 -35 1 3310.48 541.206 3
 -1 -35 -1 3387.93 528.126 3
 1 -35 -2 130343 2869.82 3
 -1 -35 -2 129024 2786.84 3
 -1 -35 2 133914 2722.21 3
 1 -35 2 127037 2719.2 3
 -1 -35 3 2641.97 395.758 3
 -1 -35 -3 2611.7 442.23 3
 1 -35 3 2264.74 393.331 3
 1 -35 -3 2586.61 448.855 3
 -1 -35 -4 16496.8 1021.96 3
 1 -35 4 15004.9 898.474 3
 -1 -35 4 15236.1 897.504 3
 1 -35 -4 15360.9 1024.71 3
 1 -35 5 1287.47 302.896 3
 -1 -35 5 1819.77 361.21 3
 1 -35 6 13112.7 838.833 3
 -1 -35 6 13428 839.421 3
 1 -35 7 232.19 160.811 3
 -1 -35 7 182.095 137.745 3
 -1 -35 8 70614.2 1893.68 3
 1 -35 8 72970.6 1944.46 3
 -1 -35 9 10826.2 832.165 3
 1 -35 9 11004 843.306 3
 -1 -35 10 106796 2259.27 3
 1 -35 10 109679 2308.16 3
 -1 -35 11 8480.55 651.515 3
 1 -35 11 8986.6 699.752 3
 1 -35 12 17988.2 874.167 3
 -1 -35 12 17454.5 852.97 3
 -1 -35 13 384.245 141.225 3
 1 -35 13 116.534 117.03 3
 1 -37 0 189565 3408.31 3
 -1 -37 0 191655 3365.72 3
 -1 -37 1 7723.27 726.1 3
 1 -37 -1 7940.64 775.593 3
 1 -37 1 8395.52 775.936 3
 -1 -37 -1 8131.23 759.443 3
 1 -37 2 42950.5 1598.75 3
 -1 -37 -2 45674.6 1671.84 3
 1 -37 -2 43439.8 1667.5 3
 -1 -37 2 43459.4 1592.79 3
 1 -37 3 983.639 263.487 3
 -1 -37 3 941.916 243.858 3
 1 -37 -3 1062.58 296.585 3
 -1 -37 -3 1240.51 293.684 3
 1 -37 4 41151.4 1501.57 3
 -1 -37 4 42274.2 1496.73 3
 1 -37 -4 44529.7 1747.44 3
 -1 -37 5 2396.97 376.171 3
 1 -37 5 2359.25 394.809 3
 -1 -37 6 6922.5 599.798 3
 1 -37 6 7251.02 615.157 3
 1 -37 7 -8.04193 154.672 3
 -1 -37 7 148.868 119.791 3
 -1 -37 8 30689.1 1224.18 3
 1 -37 8 31855.4 1261.9 3
 -1 -37 9 9063.21 682.66 3
 1 -37 9 9078.03 690.247 3
 1 -37 10 65951.8 1726.71 3
 -1 -37 10 66370.9 1704.15 3
 1 -37 11 4906.37 478.115 3
 -1 -37 11 4192.24 434.628 3
 -1 -37 12 3784.66 369.22 3
 1 -37 12 4034.2 385.452 3
 1 -37 13 -22.2172 76.7893 3
 1 -39 0 130127 2814.72 3
 -1 -39 0 134321 2798.35 3
 1 -39 -1 10415.4 820.503 3
 1 -39 1 10421.3 797.045 3
 -1 -39 1 10696.5 794.997 3
 -1 -39 -1 11273 839.294 3
 -1 -39 2 1979.33 339.274 3
 1 -39 2 1680.41 330.433 3
 1 -39 -2 2162.04 422.113 3
 -1 -39 -2 2199.62 412.257 3
 -1 -39 3 11461.8 804.556 3
 1 -39 -3 12310.1 917.145 3
 1 -39 3 11796.5 840.826 3
 -1 -39 -3 11378.9 853.146 3
 1 -39 4 55497.2 1760.47 3
 -1 -39 4 57108.6 1744.01 3
 1 -39 5 12189 816.667 3
 -1 -39 5 12235.7 811.232 3
 -1 -39 6 11227.7 745.012 3
 1 -39 6 11026.9 752.958 3
 -1 -39 7 93.7944 137.54 3
 1 -39 7 -53.5616 129.178 3
 1 -39 8 11978.4 750.354 3
 -1 -39 8 11334.9 724.862 3
 1 -39 9 8799.02 639.907 3
 -1 -39 9 9308.44 659.112 3
 1 -39 10 15130.1 786.706 3
 -1 -39 10 14616.6 755.564 3
 -1 -39 11 656.99 158.841 3
 1 -39 11 798.133 190.708 3
 1 -39 12 561.334 162.947 3
 -1 -41 0 14037.5 887.108 3
 1 -41 0 14075.6 898.67 3
 1 -41 -1 1847.18 348.799 3
 -1 -41 1 2148.55 391.928 3
 -1 -41 -1 2235.78 392.788 3
 1 -41 1 2027.66 360.746 3
 -1 -41 -2 4565.11 529.597 3
 1 -41 -2 4648.47 552.124 3
 -1 -41 2 4019.9 471.385 3
 1 -41 2 4316.35 503.9 3
 1 -41 3 26696.6 1203.86 3
 -1 -41 3 26954 1181.39 3
 1 -41 4 53589.2 1673.08 3
 -1 -41 4 55217.1 1671.03 3
 1 -41 5 47354.2 1561.11 3
 -1 -41 5 46285.3 1508.72 3
 1 -41 6 30989.8 1224.79 3
 -1 -41 6 31207.3 1202.43 3
 1 -41 7 860.012 214.093 3
 -1 -41 7 824.77 204.086 3
 1 -41 8 2950.9 355.052 3
 -1 -41 8 2904.01 359.817 3
 1 -41 9 4478.57 425.708 3
 -1 -41 9 4259.53 413.718 3
 1 -41 10 1339.84 245.022 3
 -1 -41 10 1491.5 239.119 3
 1 -43 0 2497.41 381.391 3
 -1 -43 0 2477.07 381.354 3
 1 -43 -1 1637.7 325.831 3
 -1 -43 1 1572.26 307.55 3
 1 -43 1 1780.72 339.815 3
 -1 -43 -1 1454.24 299.581 3
 1 -43 2 1964.5 331.655 3
 -1 -43 2 1808.74 307.246 3
 1 -43 -2 1863.94 341.498 3
 1 -43 3 37327.6 1359.28 3
 -1 -43 3 37883.2 1334.66 3
 -1 -43 4 27059 1116.44 3
 1 -43 4 27572.3 1148.77 3
 -1 -43 5 71861.7 1773.08 3
 1 -43 5 73683.6 1821.92 3
 -1 -43 6 20098.8 921.614 3
 1 -43 6 20411.3 946.901 3
 -1 -43 7 10694.1 647.124 3
 1 -43 7 10527.8 649.193 3
 1 -43 8 239.361 141.206 3
 -1 -43 8 48.5142 106.757 3
 1 -43 9 2866.51 320.085 3
 -1 -43 9 2384.51 286.072 3
 1 -45 0 3010.92 399.78 3
 -1 -45 0 2645.09 371.469 3
 1 -45 -1 9373.36 693.347 3
 -1 -45 1 9456.79 648.655 3
 1 -45 1 9541.66 672.566 3
 -1 -45 2 -12.629 109.501 3
 1 -45 2 277.501 152.305 3
 1 -45 3 22060.3 975.001 3
 -1 -45 3 22257.4 957.895 3
 1 -45 4 8284.69 593.23 3
 -1 -45 4 7960.42 564.336 3
 1 -45 5 60218.6 1540.14 3
 -1 -45 5 58569.3 1479.18 3
 1 -45 6 7741.81 551.427 3
 -1 -45 6 7471.48 524.377 3
 1 -45 7 17285.3 769.029 3
 -1 -45 7 16771.4 735.827 3
 -1 -47 1 27473.9 1015.66 3
 1 -47 1 28161.9 1057.82 3
 -1 -47 2 304.159 136.733 3
 1 -47 2 281.929 174.681 3
 1 -47 3 2086.49 286.954 3
 -1 -47 3 1890.68 265.285 3
 -1 -47 4 812.819 197.383 3
 1 -47 4 807.197 188.439 3
 1 -47 5 39373.7 1127.93 3
 2 0 0 582361 1956.95 2
 -2 0 2 86253.1 811.872 1
 2 0 -2 87195 900.212 1
 2 0 -3 98.7395 96.8759 1
 -2 0 3 170.177 75.1771 1
 -2 0 4 3359.33 318.775 1
 2 0 -4 1623.22 294.393 1
 2 0 5 733.236 191.796 1
 -2 0 5 936.488 165.039 1
 2 0 -5 997.005 230.392 1
 2 0 6 1991.5 286.16 1
 2 0 -6 1797.51 294.228 1
 -2 0 6 2241.24 256.757 1
 -2 0 7 97.6943 119.942 1
 2 0 7 122.551 162.683 1
 -2 0 8 235006 2940.85 1
 2 0 -9 12294.3 638.17 5
 -2 0 -9 11896.9 623.062 5
 -2 0 -10 125561 2042.19 5
 2 0 -10 125261 2046.87 5
 -2 0 -11 14285.4 803.24 5
 -2 0 -11 13594.5 795.191 4
 2 0 -11 13726.4 791.171 5
 -2 0 -12 31748.7 1181.5 5
 2 0 -12 31928.1 1169.81 5
 -2 0 -12 33826.9 1177.07 4
 -2 0 -13 2365.56 395.735 5
 -2 0 -13 1925.85 332.781 4
 2 0 -13 1861.25 346.714 5
 2 0 -14 2210.71 344.801 5
 -2 0 -14 2218.18 339.88 5
 -2 0 -15 -20.9492 143.566 5
 2 0 -15 -89.1078 174.841 5
 -2 0 -16 12818.6 825.92 5
 2 0 -16 12787.7 832.299 5
 2 0 -17 2372.62 411.418 5
 -2 0 -17 2713.99 402.244 5
 2 0 -18 26813 1066.8 5
 -2 0 -18 25322.9 1063.34 5
 -2 0 -19 2608.84 296.75 5
 2 0 -19 3254.95 362.341 5
 2 2 0 897025 2246.99 2
 -2 2 1 9975.93 184.563 2
 2 2 -1 10428.1 246.12 1
 -2 2 2 55007.8 572.083 1
 2 2 -2 52962.5 755.59 1
 2 -2 -2 55890 680.354 1
 2 2 -3 4220.82 292.33 1
 2 -2 -3 4281.87 258.843 1
 -2 2 3 4468.31 227.835 1
 -2 2 4 172347 1628.88 1
 2 2 -4 166994 1997.86 1
 2 2 5 51.0848 112.335 1
 2 -2 -5 22.8625 119.854 1
 -2 -2 5 89.9795 84.7729 1
 2 2 -5 65.725 106.213 1
 -2 2 5 -12.6109 92.5559 1
 2 -2 5 86.3563 133.043 1
 -2 -2 6 13956.4 618.042 1
 2 -2 6 13549.1 719.481 1
 2 2 6 13433 710.755 1
 2 2 -6 14020.1 773.303 1
 -2 2 6 14412.7 607.722 1
 -2 2 7 4280.62 378.016 1
 2 -2 7 4064.28 438.337 1
 2 2 7 4115.49 430.845 1
 -2 -2 7 4888.41 405.447 1
 -2 2 8 106564 1940.39 1
 2 2 8 105640 2285.09 1
 -2 -2 -9 22504.9 888.962 4
 2 -2 -9 23575.5 841.064 5
 2 2 -9 21962.5 859.719 5
 -2 -2 -9 21832.3 809.402 5
 -2 2 -10 111909 1942.65 5
 -2 2 -10 112331 1907.53 4
 -2 -2 -10 109875 1883.42 5
 -2 -2 -10 110605 2011.24 4
 2 -2 -10 115300 1931.72 5
 2 -2 -10 114324 2020.34 4
 -2 2 -11 7475.62 593.702 5
 2 -2 -11 8218.37 636.476 4
 -2 2 -11 7992.27 589.773 4
 -2 -2 -11 7354.35 559.31 5
 -2 -2 -11 8351.1 613.74 4
 2 -2 -11 7506.65 570.267 5
 2 2 -11 7243.56 583.01 5
 -2 2 -12 29535.4 1132.11 5
 -2 2 -12 28004.7 1096.46 4
 2 -2 -12 30014.3 1121.85 5
 2 2 -12 29425.5 1141.55 5
 -2 -2 -12 30210.9 1128.27 5
 -2 -2 -12 29681.2 1129.36 4
 2 -2 -12 33366.3 1201.77 4
 -2 -2 -13 145.451 154.711 5
 -2 2 -13 254.645 198.545 5
 2 2 -13 486.315 210.584 5
 -2 -2 -13 258.483 196.572 4
 2 -2 -13 392.247 194.521 5
 -2 2 -14 343.317 191.041 5
 2 -2 -14 407.715 209.071 5
 -2 -2 -14 505.201 219.522 4
 2 2 -14 382.828 187.409 5
 -2 -2 -14 515.656 205.385 5
 2 -2 -15 -210.731 188.99 5
 -2 -2 -15 -88.128 152.478 4
 2 2 -15 -166.309 183.063 5
 -2 -2 -15 -157.063 200.69 5
 -2 2 -15 -68.3325 170.19 5
 -2 2 -16 456.491 217.907 5
 -2 -2 -16 391.038 184.008 5
 2 2 -16 226.638 164.822 5
 2 -2 -16 382.592 158.608 5
 2 2 -17 6839.32 627.414 5
 -2 -2 -17 6796.81 608.652 5
 2 -2 -17 7661.55 629.491 5
 -2 2 -17 7802.87 630.106 5
 2 -2 -18 8371.22 607.451 5
 -2 -2 -18 8819.86 588.357 5
 2 2 -18 8073.59 650.424 5
 -2 2 -18 8608.39 608.816 5
 -2 -2 -19 5533.06 428.526 5
 -2 2 -19 6151.93 468.012 5
 2 2 -19 6173.5 504.965 5
 2 -2 -19 5785.98 498.219 5
 2 4 0 73066.8 644.21 2
 -2 -4 0 78524.2 721.007 2
 2 4 -1 63656.7 672.21 1
 -2 4 1 59484.7 464.306 2
 2 4 -2 352.346 84.7523 1
 -2 4 2 375.494 45.2606 1
 2 -4 -2 287.922 52.5307 1
 2 -4 -3 1113.15 144.561 1
 -2 4 3 1018.8 117.378 1
 2 4 -3 965.026 178.44 1
 2 -4 -4 42240.2 936.398 1
 -2 4 4 43093.1 777.977 1
 -2 4 5 68489.9 1140.92 1
 -2 -4 5 65625.4 1255.4 1
 2 4 -5 65859.1 1515.98 1
 -2 4 6 3583.53 302.83 1
 2 4 6 3860.95 394.333 1
 -2 -4 6 3956.01 350.012 1
 2 -4 6 3635.05 383.416 1
 2 4 -6 3495.4 408.136 1
 2 4 7 3735.08 411.85 1
 -2 -4 7 3301.18 341.522 1
 -2 4 7 3130.13 315.735 1
 2 -4 7 3073.29 375.232 1
 2 4 8 95119.4 2172.67 1
 -2 4 8 92164.3 1739.45 1
 -2 -4 -9 26282.8 857.44 5
 2 -4 -9 27152.2 883.562 5
 2 -4 -9 27115.3 946.958 4
 -2 -4 -9 27649.7 975.731 4
 -2 -4 -10 37894.2 1092.88 5
 2 -4 -10 37300.6 1112.68 5
 2 4 -10 36574.4 1141.65 5
 -2 -4 -10 38432.2 1208.05 4
 2 -4 -10 38564.6 1178.55 4
 -2 -4 -11 3226.4 364.41 5
 2 -4 -11 3535.49 414.525 4
 -2 4 -11 2821.58 389.487 5
 2 -4 -11 3417.64 379.933 5
 -2 -4 -11 3259.33 410.583 4
 2 4 -11 2984.78 413.644 5
 2 4 -12 571.802 211.235 5
 -2 -4 -12 357.875 181.967 4
 -2 -4 -12 937.043 232.702 5
 2 -4 -12 804.448 227.708 4
 2 -4 -12 495.689 196.882 5
 -2 4 -12 397.274 154.609 5
 -2 -4 -13 3114.22 417.944 4
 -2 4 -13 3308.18 425.315 5
 -2 -4 -13 2849.08 394.028 5
 2 -4 -13 3069.54 436.271 4
 2 4 -13 3072.56 423.344 5
 2 -4 -13 2590.52 378.667 5
 2 -4 -14 10023.4 748.531 4
 2 4 -14 9059.27 726.523 5
 -2 -4 -14 10065.2 688.264 5
 -2 4 -14 9965.08 756.669 5
 -2 -4 -14 9338.19 711.418 4
 2 -4 -14 9218.36 675.566 5
 2 4 -15 5190.26 540.832 5
 -2 -4 -15 4265.54 500.166 5
 -2 -4 -15 4974.36 546.511 4
 2 -4 -15 4265.93 501.239 5
 -2 4 -15 5487.33 587.369 5
 2 4 -16 513.497 250.708 5
 -2 -4 -16 389.347 183.748 5
 -2 4 -16 531.271 249.438 5
 2 -4 -16 378.783 219.949 5
 -2 4 -17 272.039 184.673 5
 2 4 -17 58.9112 152.81 5
 -2 -4 -17 386.243 157.131 5
 2 -4 -17 454.707 182.061 5
 -2 4 -18 10886.4 703.665 5
 2 4 -18 11718.1 738.395 5
 -2 -4 -18 11410.8 653.549 5
 2 -4 -18 11823.6 708.789 5
 2 -4 -19 4127.53 399.287 5
 -2 4 -19 4707.59 413.355 5
 -2 -4 -19 4058.44 359.628 5
 2 4 -19 4360.31 439.97 5
 -2 -6 0 220.001 51.0751 2
 2 6 1 31.5754 36.6548 2
 2 6 -1 8.68499 46.4675 1
 2 -6 1 21.1151 64.5036 1
 2 -6 -2 65726.7 588.372 1
 2 6 -2 65432.7 998.662 1
 2 -6 2 65092.1 1085.27 1
 2 -6 3 137643 1820 1
 -2 6 3 143058 1004.61 1
 2 6 -4 2098.76 260.635 1
 -2 6 4 1988.18 160.49 1
 -2 6 5 4565.56 292.804 1
 2 6 -5 4441.52 428.401 1
 2 -6 5 4691.48 406.542 1
 -2 -6 5 4654.74 344.695 1
 2 6 -6 34454.3 1266.86 1
 2 6 6 36008.3 1153.02 1
 -2 -6 6 35105.1 1005.56 1
 2 -6 6 34346.9 1157.49 1
 -2 6 6 35564.1 887.678 1
 -2 -6 7 612.808 157.234 1
 2 6 7 524.776 170.492 1
 2 6 -7 283.607 189.065 1
 -2 6 7 231.66 103.081 1
 2 -6 7 273.658 210.713 1
 2 -6 -8 4664.07 349.862 5
 -2 6 8 4662.42 388.769 1
 2 6 8 4664.19 484.275 1
 -2 -6 -9 27327.4 980.844 4
 -2 -6 -9 24751.4 837.068 5
 -2 6 9 24068.3 923.346 1
 2 -6 -9 26202.2 935.29 4
 2 -6 -10 4276.37 392.294 5
 -2 -6 -10 4500.01 434.599 4
 -2 -6 -10 3488.49 393.93 5
 2 -6 -10 5133.01 468.262 4
 -2 -6 -11 258.037 134.505 5
 2 6 -11 528.209 216.98 5
 2 -6 -11 386.308 179.832 4
 -2 -6 -11 387.976 193.111 4
 2 -6 -11 329.823 115.081 5
 2 6 -12 7845.42 628.881 5
 2 -6 -12 7880.14 596.939 5
 -2 -6 -12 7572.98 672.489 4
 -2 6 -12 8110.52 644.967 5
 2 -6 -12 7339.79 640.74 4
 -2 -6 -12 8369.21 582.925 5
 2 -6 -13 27402.4 1174.49 4
 2 -6 -13 25145.9 1054.71 5
 -2 6 -13 27436.1 1187.17 5
 2 6 -13 28378.7 1220.42 5
 -2 -6 -13 28306.1 1085.91 5
 2 -6 -14 31860.4 1319.6 4
 2 6 -14 33028.7 1381.76 5
 2 -6 -14 33728 1277.44 5
 -2 -6 -14 36166.9 1269.85 5
 -2 6 -14 34202.3 1384.2 5
 -2 -6 -14 30878.7 1320.62 4
 -2 -6 -15 24996.8 1089.82 5
 2 -6 -15 20817.4 1090.28 5
 -2 6 -15 25119.7 1205.82 5
 -2 -6 -15 23194.7 1118.95 4
 2 -6 -15 22924.8 1142.35 4
 2 6 -15 25335.3 1201 5
 -2 -6 -16 16419 892.784 5
 -2 -6 -16 15319.9 880.832 4
 -2 6 -16 16842.5 975.991 5
 2 -6 -16 17070.4 913.166 5
 2 -6 -17 1379.23 304.698 5
 -2 6 -17 1429.03 311.919 5
 -2 -6 -17 1272.69 268.315 5
 2 6 -17 1118.73 286.108 5
 -2 6 -18 606.259 205.955 5
 -2 -6 -18 522.88 145.932 5
 2 6 -18 351.946 177.036 5
 2 -6 -18 389.633 177.75 5
 2 6 -19 1045.23 231.108 5
 -2 6 -19 666.513 176.953 5
 2 -8 0 6903.2 222.227 1
 -2 -8 0 6351.85 236.353 2
 2 8 1 16418.5 337.553 2
 2 -8 1 17016.1 471.14 1
 -2 -8 2 53270.1 801.616 1
 2 8 -2 56106.8 1015.22 1
 2 -8 2 53488.6 991.988 1
 2 -8 3 27905.7 812.298 1
 -2 -8 3 29750.1 688.075 1
 2 8 -3 29614.7 884.702 1
 -2 -8 4 79947.3 1277.01 1
 2 -8 4 80748.2 1543.7 1
 2 8 -4 78358.1 1567.86 1
 2 -8 5 52261.9 1339.86 1
 -2 8 5 53772.7 875.829 1
 -2 -8 5 51846.8 1144.83 1
 2 8 -5 51042.7 1437.65 1
 2 8 -6 33751.4 1299.34 1
 -2 8 6 35508.4 818.683 1
 -2 -8 6 35065.9 1031.31 1
 2 -8 6 35625 1224.96 1
 2 8 6 36471.6 1157.95 1
 2 8 -7 82399.9 2276.03 1
 2 8 7 86199 1889.53 1
 -2 8 7 84086.8 1385.45 1
 -2 8 8 9706.72 519.176 1
 2 -8 -8 10902.9 562.483 5
 -2 -8 -8 12182 646.931 4
 2 8 8 11093.2 733.575 1
 2 -8 -8 12039.1 623.498 4
 -2 -8 -9 9624.31 513.584 5
 2 -8 -9 9727.08 604.401 4
 2 -8 -9 9577.21 524.184 5
 -2 -8 -9 9175.49 615.036 4
 -2 -8 -10 2705.81 354.431 4
 2 -8 -10 2651.14 321.643 5
 2 -8 -10 2902 382.005 4
 -2 -8 -10 2874.03 303.91 5
 -2 -8 -11 9852.67 698.249 4
 -2 -8 -11 9123.83 573.271 5
 2 -8 -11 9164.34 682.186 4
 2 -8 -11 9718.95 604.708 5
 2 8 -12 3524.07 469.276 5
 -2 -8 -12 4084.29 413.623 5
 2 -8 -12 3751.4 408.166 5
 2 -8 -12 3794.69 478.8 4
 -2 -8 -12 3895.56 479.699 4
 2 8 -13 42641.3 1538.87 5
 -2 -8 -13 48467 1409.31 5
 -2 8 -13 44885.7 1611.8 5
 2 -8 -13 48675.4 1615.05 4
 2 -8 -13 45745.7 1416.2 5
 2 -8 -14 38912.8 1392.31 5
 -2 -8 -14 40694.1 1352.94 5
 2 8 -14 32040.9 1364.7 5
 2 -8 -14 33383.7 1386.31 4
 -2 8 -14 32927.5 1434.23 5
 -2 -8 -14 33429.8 1398.47 4
 2 -8 -15 66012.1 1752.91 5
 2 8 -15 69501.4 2015.37 5
 -2 -8 -15 66547.2 1919.62 4
 2 -8 -15 65688.2 1909.01 4
 -2 -8 -15 72445.3 1778.37 5
 2 -8 -16 5711.19 578.107 4
 2 8 -16 6011.64 604.775 5
 -2 -8 -16 5174.24 569.422 4
 -2 8 -16 6021.24 619.669 5
 2 -8 -16 5671.73 538.06 5
 -2 -8 -16 5656.89 503.879 5
 2 -8 -17 908.849 245.271 5
 2 8 -17 1236.92 321.21 5
 -2 -8 -17 1065.9 263.572 4
 -2 8 -17 1048.59 286.922 5
 -2 -8 -17 1257.2 256.444 5
 -2 8 -18 72.6074 136.399 5
 2 8 -18 112.69 151.789 5
 -2 8 -19 307.15 142.972 5
 2 8 -19 91.0717 114.945 5
 2 10 0 1225.6 138.423 1
 2 -10 0 1325.13 104.434 1
 -2 -10 0 1177.01 118.152 2
 2 -10 1 19553.2 506.734 1
 2 10 -1 16278 508.853 1
 2 10 -2 1807.86 270.912 1
 2 -10 2 1544.41 223.869 1
 -2 -10 3 104394 1306.83 1
 2 10 -3 107640 1758.12 1
 2 -10 3 105034 1611.36 1
 2 -10 4 15863.1 702.48 1
 2 10 -4 15649.5 750.604 1
 -2 10 4 16261.6 317.843 1
 -2 -10 4 15151.4 572.517 1
 2 -10 5 290125 3261.82 1
 -2 -10 5 281359 2684.57 1
 2 10 -5 284716 3568.56 1
 2 10 -6 36684.7 1427.24 1
 2 10 6 38498.7 1167.49 1
 -2 10 6 36552.2 749.939 1
 -2 -10 6 35739.9 1059.16 1
 2 -10 6 37414.5 1273.21 1
 2 10 -7 123759 2889.56 1
 -2 10 7 120343 1496.68 1
 -2 -10 -8 191.563 114.508 4
 2 -10 -8 315.746 116.353 4
 2 -10 -8 162.159 125.642 5
 2 10 8 260.831 160.447 1
 2 -10 -9 4099.89 412.212 4
 -2 -10 -9 4062.41 348.779 5
 -2 -10 -9 4194.9 417.492 4
 2 -10 -9 3673.64 368.599 5
 -2 -10 -10 340.334 176.257 4
 2 -10 -10 213.895 117.265 5
 -2 -10 -10 -2.09074 83.0365 5
 2 -10 -10 208.011 159.525 4
 2 -10 -11 1389.06 245.525 5
 2 -10 -11 1221.51 282.345 4
 -2 -10 -11 1122.66 207.233 5
 -2 -10 -11 1057.49 257.977 4
 2 -10 -12 3470.17 410.035 5
 2 10 -12 2688.56 454.294 5
 -2 -10 -12 1798.19 358.756 4
 -2 -10 -12 3767.19 430.418 5
 2 -10 -12 2744.72 482.728 4
 -2 10 -13 34027.3 1403.68 5
 2 -10 -13 28939 1274.13 4
 2 10 -13 36407 1401.51 5
 -2 -10 -13 27665 1251.99 4
 2 -10 -13 34124.1 1229.26 5
 -2 -10 -13 30587 1119.68 5
 -2 10 -14 13858.5 954.769 5
 -2 -10 -14 12589.6 932.464 4
 2 -10 -14 11641.3 906.732 4
 2 10 -14 13862.9 952.047 5
 2 -10 -14 14938 868.321 5
 2 -10 -15 38895.7 1316.5 5
 2 -10 -15 35485.9 1437.21 4
 2 10 -15 35043.3 1441.71 5
 -2 10 -15 39888.4 1537.91 5
 -2 -10 -15 36845.1 1238.96 5
 -2 -10 -15 37777.7 1473.08 4
 2 -10 -16 5757.61 565.593 5
 -2 10 -16 5884.28 623.361 5
 2 -10 -16 5297.34 568.584 4
 -2 -10 -16 5894.59 523.405 5
 -2 -10 -16 4849.16 561.809 4
 2 10 -16 6872.97 673.552 5
 -2 10 -17 2711.76 407.956 5
 2 -10 -17 2487.07 343.235 5
 -2 -10 -17 2883 403.063 4
 2 10 -17 3059.33 416.684 5
 2 10 -18 450.887 194.396 5
 -2 10 -18 225.633 145.535 5
 -2 10 -19 241.685 141.036 5
 2 10 -19 201.127 129.624 5
 -2 -12 0 140.001 65.4654 2
 2 12 0 6.7463 68.5183 1
 2 -12 0 55.8105 33.5084 1
 -2 -12 1 46799.1 721.362 2
 2 12 -1 42917.6 920.063 1
 2 -12 1 50177.9 806.129 1
 2 12 -2 16598.8 668.7 1
 2 -12 2 15981.7 561.015 1
 -2 -12 3 12103.7 469.045 1
 2 -12 3 11810.9 547.645 1
 2 12 3 10205.3 340.313 2
 2 12 -3 11949.6 628.446 1
 2 -12 4 2128.75 272.212 1
 -2 -12 4 2426.19 247.791 1
 2 12 4 1396 179.972 2
 2 12 -4 2174.92 324.442 1
 2 -12 5 143728 2320.37 1
 2 12 -5 145876 2723.33 1
 -2 -12 5 138446 1912.46 1
 2 -12 6 7082.09 608.231 1
 2 12 -6 6072.29 696.315 1
 2 12 6 6493.76 515.718 1
 -2 -12 6 6179.98 502.698 1
 -2 12 6 5830.6 267.424 1
 2 -12 -7 36007.1 1080.67 4
 -2 -12 -7 34183.1 1031.03 4
 -2 -12 -8 1651.56 214.493 5
 2 -12 -8 1347.48 204.207 5
 2 -12 -8 1337.32 252.306 4
 -2 -12 -8 1385.09 241.924 4
 2 -12 -9 5517.75 488.23 4
 -2 -12 -9 5966.43 513.684 4
 -2 -12 -9 6380.18 433.194 5
 2 -12 -9 6179.78 448.714 5
 -2 -12 -10 1772.12 283.849 5
 -2 -12 -10 1256.31 312.501 4
 2 -12 -10 1197.69 312.175 4
 2 -12 -10 2009.92 300.736 5
 2 -12 -11 712.818 265.854 4
 2 -12 -11 1090.57 227.359 5
 -2 -12 -11 1136.94 302.543 4
 -2 -12 -11 949.344 201.33 5
 2 -12 -12 -5.86359 163.875 4
 -2 -12 -12 -65.3835 139.991 5
 2 -12 -12 -37.8632 109.708 5
 -2 -12 -12 408.312 235.649 4
 2 12 -13 18185.9 1035.28 5
 -2 -12 -13 14160.4 759.134 5
 2 -12 -13 16870.9 873.394 5
 2 -12 -13 13964.5 959.029 4
 -2 -12 -13 14233.9 943.267 4
 2 12 -14 1149.46 317.414 5
 2 -12 -14 1442.26 359.692 4
 -2 -12 -14 1145.96 244.27 5
 -2 -12 -14 1587.81 411.676 4
 -2 12 -14 1666.56 402.385 5
 2 -12 -14 1969.84 347.253 5
 -2 -12 -15 26716 1067.47 5
 2 -12 -15 26877.1 1117.4 5
 2 12 -15 28768.5 1316.21 5
 -2 12 -15 30170 1362.36 5
 -2 -12 -15 25034.8 1255.86 4
 2 -12 -15 24801.7 1216.45 4
 -2 12 -16 1207.6 328.506 5
 2 12 -16 1502.45 338.177 5
 -2 -12 -16 1900.16 398.882 4
 2 -12 -16 1582.42 337.523 4
 2 -12 -16 1782.74 332.369 5
 2 12 -17 474.993 229.437 5
 -2 -12 -17 393.151 183.453 4
 -2 12 -17 225.231 173.179 5
 2 12 -18 24.2514 119.956 5
 -2 12 -18 278.948 154.657 5
 -2 12 -19 761.891 197.142 5
 2 12 -19 220.107 137.453 5
 -2 -14 0 19482.9 547.111 2
 2 14 0 14849.2 507.829 1
 2 -14 1 44971 741.564 1
 -2 -14 1 46774.6 777.313 2
 2 14 -2 2306.3 285.062 1
 2 -14 2 2027.75 207.007 1
 2 -14 3 7214.25 429.897 1
 2 14 -3 7674.52 546.998 1
 2 14 3 7779.02 261.445 2
 2 14 -4 1611.29 283.549 1
 2 -14 4 1780.14 241.214 1
 2 14 4 1658.02 150.518 2
 -2 -14 4 1590.8 196.2 1
 -2 -14 5 132712 1895.73 1
 2 14 -5 138648 2810.7 1
 2 -14 5 138064 2290.43 1
 2 14 5 140706 1718.82 2
 2 14 -6 315.362 163.718 1
 2 14 6 227.198 123.991 1
 2 -14 -6 47.1137 106.81 4
 2 -14 -7 2038.15 248.754 5
 2 -14 -7 2080.1 288.791 4
 -2 -14 -7 2285.83 293.371 4
 -2 -14 -8 3521.82 345.293 5
 2 -14 -8 4496.36 394.125 5
 -2 -14 -8 3986.08 409.274 4
 2 -14 -8 4097.63 424.761 4
 -2 -14 -9 93265.7 1650.14 5
 2 -14 -9 89104.1 1747.1 5
 -2 -14 -9 91375.9 1994.22 4
 2 -14 -9 91678.6 1988.15 4
 -2 -14 -10 3237.86 368.817 5
 -2 -14 -10 3539.94 480.167 4
 2 -14 -10 2862.22 401.298 5
 2 -14 -10 3389.37 493.013 4
 2 -14 -11 16127.7 965.413 4
 2 -14 -11 16490.7 804.75 5
 -2 -14 -11 15700.6 938.199 4
 2 -14 -12 -23.4384 118.084 5
 -2 -14 -12 -379.329 255.454 4
 -2 -14 -12 0.14978 100.03 5
 2 -14 -12 -215.025 254.668 4
 -2 -14 -13 741.208 194.385 5
 2 14 -13 1412.58 310.5 5
 2 -14 -13 926.045 332.13 4
 -2 -14 -13 1370.28 349.32 4
 2 -14 -13 1209.4 261.584 5
 2 -14 -14 2682.44 477.886 4
 2 -14 -14 2709.28 406.634 5
 2 14 -14 2781.12 493.684 5
 -2 14 -14 3469.21 512.829 5
 -2 -14 -14 2765.28 499.473 4
 -2 -14 -14 2178.25 305.115 5
 -2 14 -15 3625.9 514.896 5
 2 -14 -15 3520.12 493.108 4
 -2 -14 -15 2948.4 481.881 4
 2 14 -15 2815.88 473.01 5
 -2 -14 -16 658.2 275.561 4
 -2 14 -16 231.178 199.219 5
 2 14 -16 695.672 285.701 5
 2 14 -17 1430.13 293.312 5
 -2 14 -17 1286.72 302.638 5
 -2 -14 -17 885.763 267.745 4
 -2 14 -18 2337.9 357.36 5
 2 14 -18 2379.4 363.146 5
 2 14 -19 6759.4 490.602 5
 -2 -16 0 41118.3 866.438 2
 2 16 0 44265 1003.91 1
 2 16 1 67698.2 1058.68 1
 2 -16 1 59853.8 847.708 1
 -2 -16 1 61277.3 988.104 2
 2 16 -1 69532.2 1442.88 1
 2 16 -2 3312.1 359.044 1
 2 -16 2 3192.98 252.328 1
 2 16 2 3469.87 208.037 1
 2 16 -3 5274.33 491.336 1
 2 -16 3 4778.03 341.88 1
 2 16 -4 196.133 197.243 1
 2 -16 4 561.303 179.459 1
 2 -16 5 14579.3 734.587 1
 -2 -16 5 15409.2 674.72 1
 2 16 5 15183.2 546.206 1
 2 16 5 16852 450.977 2
 2 16 -5 16558 1042.48 1
 -2 -16 -6 144.272 122.187 4
 2 -16 -6 133.321 102.687 4
 2 -16 -7 21743.3 902.723 4
 -2 -16 -7 22680.3 900.47 4
 2 -16 -8 26901.4 1079.65 4
 -2 -16 -8 27275.2 1075.67 4
 2 -16 -9 69929.3 1556.47 5
 -2 -16 -9 69981.2 1780.96 4
 2 -16 -9 68927.5 1795.65 4
 -2 -16 -10 29256.1 1251.99 4
 2 -16 -10 28079.3 1070.49 5
 2 -16 -10 28619.5 1274.28 4
 -2 -16 -10 30359.5 1013.14 5
 2 -16 -11 14251.9 923.201 4
 2 -16 -11 14248.4 763.947 5
 -2 -16 -11 13520 901.226 4
 2 -16 -12 5567.69 543.689 5
 -2 -16 -12 6300.2 671.232 4
 2 -16 -12 4725.68 565.061 4
 -2 -16 -13 2430.68 454.127 4
 2 -16 -13 1881.3 412.605 4
 2 16 -14 1673 372.967 5
 -2 -16 -14 1654.52 380.141 4
 2 -16 -14 1263.08 390.246 4
 -2 -16 -15 1238.6 335.773 4
 2 -16 -15 936.025 309.985 4
 -2 16 -15 1104.26 312.578 5
 2 16 -15 1087.95 326.605 5
 2 16 -16 552.679 223.116 5
 -2 16 -16 473.953 233.06 5
 -2 -16 -16 895.275 308.27 4
 -2 -16 -17 11640.9 786.545 4
 -2 16 -17 12385.7 827.609 5
 2 16 -17 13100.5 824.232 5
 2 16 -18 9191.47 634.31 5
 -2 16 -18 8867.12 627.05 5
 2 18 0 33086.5 941.792 1
 -2 -18 0 29849.4 810.11 2
 -2 -18 1 33742.9 791.594 2
 2 18 1 37100.6 858.299 1
 2 18 -1 35834.2 1090.54 1
 2 -18 2 3254.31 240.407 1
 2 18 -2 4000.04 411.032 1
 -2 -18 2 3316.91 249.848 2
 2 18 2 3678.58 227.21 1
 2 18 3 1780.01 138.433 1
 2 -18 3 1718.2 212.808 1
 2 18 -3 2194.9 349.802 1
 2 -18 4 27735.8 930.848 1
 2 18 -4 30648.6 1371.77 1
 2 -18 -4 27574 986.796 3
 2 18 -5 379.935 221.599 1
 -2 -18 -5 327.477 148.533 4
 2 -18 -5 598.883 173.374 3
 2 -18 -5 247.228 149.918 4
 -2 -18 -6 6572.57 518.897 4
 2 -18 -6 6141.76 480.113 4
 -2 -18 -7 24801.3 979.712 4
 2 -18 -7 24976.8 984.539 4
 -2 -18 -8 60965.5 1620.73 4
 2 -18 -8 61203.2 1630.03 4
 2 -18 -9 66385.8 1827.71 4
 -2 -18 -9 69137.7 1829.01 4
 2 -18 -10 26407.3 1228.04 4
 -2 -18 -10 26106.1 1209.25 4
 -2 -18 -11 23416.2 1213.95 4
 2 -18 -11 24083.5 1227.56 4
 2 -18 -12 776.381 277.057 4
 -2 -18 -12 1233.17 336.204 4
 2 -18 -13 970.869 350.344 4
 -2 -18 -13 885.563 281.693 4
 -2 -18 -14 2306.53 416.998 4
 2 -18 -14 2452.75 456.256 4
 2 18 -14 3135.45 468.085 5
 2 18 -15 998.104 346.584 5
 -2 18 -15 940.147 270.754 5
 2 -18 -15 1268.17 332.626 4
 -2 -18 -15 992.62 316.719 4
 -2 -18 -16 1934.01 376.209 4
 -2 18 -16 2056.32 397.32 5
 2 18 -16 1680.57 396.057 5
 2 18 -17 4670.73 513.582 5
 -2 18 -17 4805.36 520.487 5
 -2 -18 -17 4895.02 525.606 4
 2 18 -18 18313.2 848.379 5
 -2 18 -18 18953.4 860.505 5
 2 20 0 128344 1865.29 1
 2 20 1 2101.6 213.38 1
 -2 -20 1 2250.88 226.898 2
 2 20 -1 2426.68 305.396 1
 2 20 -2 380.901 169.993 1
 2 -20 -2 320.586 128.343 3
 -2 -20 2 305.078 101.314 2
 2 -20 2 282.902 86.1241 3
 2 -20 3 1026.87 177.358 1
 2 -20 -3 1335.85 268.964 3
 -2 -20 3 1116.4 174.573 2
 2 20 -3 1087.79 284.639 1
 2 -20 3 981.256 200.972 3
 -2 -20 -4 16548.1 708.632 4
 2 -20 -4 16235 800.464 3
 -2 -20 -4 15640.7 710.539 3
 2 -20 4 15989.6 689.61 1
 2 -20 -4 16548.3 749.24 4
 2 20 -4 18825.6 1136 1
 2 -20 -5 571.265 186.284 3
 -2 -20 -5 218.195 118.373 4
 -2 -20 -5 351.307 126.824 3
 2 -20 -5 73.7582 135.828 4
 2 -20 -6 -7.30616 146.334 4
 -2 -20 -6 275.892 168.709 4
 -2 -20 -7 2687.32 361.446 4
 2 -20 -7 2506.9 361.521 4
 2 -20 -8 22044 1044.4 4
 -2 -20 -8 22929.1 1022.16 4
 -2 -20 -9 11043.8 786.429 4
 2 -20 -9 9748.82 780.937 4
 -2 -20 -10 31057.8 1358.18 4
 2 -20 -10 30738.5 1362.2 4
 2 -20 -11 221.002 285.852 4
 -2 -20 -11 360.21 301.017 4
 -2 -20 -12 9340.65 801.712 4
 2 -20 -12 8781.67 807.385 4
 2 -20 -13 2878.24 504.4 4
 -2 -20 -13 3458.58 520.659 4
 -2 -20 -14 5896.37 635.458 4
 2 20 -14 6342.41 630.878 5
 2 -20 -14 5934.77 677.201 4
 -2 -20 -15 1438.65 359.339 4
 2 20 -15 1374.74 361.643 5
 -2 20 -15 1537.79 356.546 5
 -2 -20 -16 75.7455 198.176 4
 -2 20 -16 87.734 178.911 5
 2 20 -16 187.259 180.437 5
 -2 20 -17 1341.87 289.116 5
 2 20 -17 1746.46 313.043 5
 -2 20 -18 8085.78 542.985 5
 2 20 -18 8725.27 560.443 5
 2 -22 0 82512.4 1697.4 3
 -2 -22 0 82692.2 1614.41 3
 -2 -22 1 2724.25 301.699 3
 -2 -22 -1 2587.07 312.714 3
 2 -22 1 2443.04 306.616 3
 2 -22 -1 2620.28 314.373 3
 2 -22 2 2731.19 322.213 3
 -2 -22 -2 2530.2 300.541 3
 2 22 -2 2243.37 338.42 1
 2 -22 -2 2536.35 335.796 3
 -2 -22 2 2486.09 288.631 3
 2 22 -3 8783.07 750.249 1
 2 -22 -3 8400.86 565.987 4
 -2 -22 3 9155.12 579.104 3
 2 -22 -3 8468.58 603.92 3
 2 -22 3 8038.59 562.63 3
 -2 -22 -3 8636.71 550.32 3
 -2 -22 -4 42140.9 1240.91 3
 2 -22 -4 44288.8 1400.69 3
 -2 -22 -4 46104.9 1229.93 4
 2 -22 -4 44717.6 1298 4
 2 -22 -5 11131.4 748.822 3
 -2 -22 -5 11020.7 663.282 3
 2 -22 -5 11357.4 691.686 4
 -2 -22 -5 11329.5 656.275 4
 2 -22 -6 32601.2 1184.37 4
 -2 -22 -6 34742.5 1173.45 4
 -2 -22 -7 3457.22 420.37 4
 2 -22 -7 2673.71 410.733 4
 -2 -22 -8 1464.92 281.735 4
 2 -22 -8 1774.48 397.29 4
 2 -22 -9 265.771 216.674 4
 -2 -22 -9 533.583 259.904 4
 2 -22 -10 3033.58 481.762 4
 -2 -22 -10 3434.55 477.461 4
 -2 -22 -11 5840.61 644.968 4
 2 -22 -11 5740.79 678.697 4
 -2 -22 -12 4837.24 575.518 4
 2 -22 -12 4814.64 610.117 4
 -2 -22 -13 1398.56 364.484 4
 2 -22 -13 1466.91 445.431 4
 2 -22 -14 18337.3 1145.16 4
 2 22 -14 19364.2 1097.9 5
 -2 -22 -14 18071.3 1104.62 4
 2 22 -15 5240.95 597.583 5
 -2 22 -15 4990.48 618.495 5
 -2 -22 -15 4935.83 595.201 4
 -2 22 -16 5020.09 560.168 5
 2 22 -16 4307.44 505.919 5
 -2 -22 -16 4259.8 512.298 4
 2 22 -17 104.978 120.005 5
 -2 22 -17 214.156 132.266 5
 -2 -24 0 38491.9 1180.9 3
 2 -24 0 38758.4 1226.41 3
 -2 -24 1 410.932 169.403 3
 -2 -24 -1 114.953 113.949 3
 2 -24 1 327.69 169.82 3
 2 -24 -1 219.903 153.836 3
 -2 -24 2 10109.4 600.894 3
 -2 -24 -2 9437.92 599.608 3
 2 -24 -2 10786.6 690.164 3
 2 -24 2 9763.5 599.081 3
 -2 -24 3 1141.82 256.878 3
 -2 -24 -3 891.894 269.97 3
 2 -24 -3 1027.5 288.703 3
 2 -24 3 976.471 250.208 3
 -2 -24 -3 1166.64 253.13 4
 -2 -24 4 207226 2898.25 3
 2 -24 -4 208019 2932.53 4
 -2 -24 -4 201707 2859.02 3
 2 -24 4 205364 2902.27 3
 2 -24 -5 3659.09 529.071 3
 -2 -24 -5 3872.53 453.786 3
 2 -24 -5 3419.73 453.194 4
 -2 -24 -5 3032.92 395.425 4
 -2 -24 -6 175846 2695.19 4
 2 -24 -6 169045 2791.2 4
 2 -24 -7 1968.93 376.826 4
 -2 -24 -7 2256.18 333.238 4
 -2 -24 -8 2322.99 355.607 4
 2 -24 -8 2475.89 422.291 4
 -2 -24 -9 53.2109 194.687 4
 2 -24 -9 177.526 295.315 4
 2 -24 -10 3105.39 503.324 4
 -2 -24 -10 2872.58 453.847 4
 2 -24 -11 4253.43 623.333 4
 -2 -24 -11 3553.46 519.621 4
 -2 -24 -12 6320.82 680.779 4
 2 -24 -12 5675.22 673.83 4
 2 -24 -13 4724.84 656.41 4
 -2 -24 -13 3642.01 595.542 4
 2 24 -14 27876.5 1289.24 5
 -2 -24 -14 28087.8 1342.48 4
 -2 -24 -15 6010.3 683.841 4
 -2 24 -15 7185.68 700.34 5
 2 24 -15 7033.77 650.196 5
 -2 24 -16 15051.3 857.128 5
 2 24 -16 12611 783.294 5
 -2 24 -17 105.917 123.672 5
 2 24 -17 549.199 183.742 5
 2 -24 17 209.748 136.577 3
 2 -26 0 3652.34 398.791 3
 -2 -26 0 3412.96 375.114 3
 2 -26 1 123.894 132.224 3
 -2 -26 -1 -91.4647 131.182 3
 2 -26 -1 229.91 161.764 3
 -2 -26 1 94.4414 111.031 3
 -2 -26 -2 30297.8 1127.21 3
 -2 -26 2 30974.2 1096.49 3
 2 -26 -2 32444.1 1241.97 3
 2 -26 2 30520.5 1108.48 3
 2 -26 3 10079.6 662.537 3
 2 -26 -3 10493.9 743.376 3
 -2 -26 -3 9548.36 612.474 4
 -2 -26 -3 9657.86 669.708 3
 -2 -26 3 10310.2 651.401 3
 -2 -26 -4 132753 2444.45 3
 2 -26 4 134347 2404.13 3
 -2 -26 4 133784 2403.26 3
 -2 -26 -4 134523 2308.62 4
 2 -26 -5 24281.6 1226.26 3
 -2 -26 -5 21732.6 1038.16 3
 -2 -26 -5 22108.2 995.278 4
 2 -26 5 23010.5 1064.8 3
 -2 -26 5 23738.2 1066.67 3
 2 -26 6 59321.6 1725.16 3
 -2 -26 -6 63111.2 1676.34 4
 2 -26 -6 61871.2 1758.2 4
 2 -26 -7 6138.19 630.83 4
 -2 -26 -7 5611.55 576.704 4
 -2 -26 -8 664.08 245.569 4
 2 -26 -8 654.425 261.272 4
 2 -26 -9 1360.34 392.3 4
 -2 -26 -9 1520.48 382.494 4
 2 -26 -10 2644.7 468.015 4
 -2 -26 -10 3075.4 480.813 4
 -2 -26 -11 2931.68 522.833 4
 2 -26 -11 2665.8 487.819 4
 -2 -26 -12 25498.4 1294.39 4
 -2 -26 -13 5179.07 624.814 4
 2 26 -14 56404.7 1760.61 5
 -2 -26 -14 54832 1811.64 4
 2 26 -15 10252.2 754.584 5
 -2 26 -15 10285.9 770.199 5
 -2 -26 16 7819.53 581.393 3
 2 26 -16 9138.48 613.886 5
 -2 26 -16 8262.03 639.706 5
 2 -26 16 7520.45 576.817 3
 2 -28 0 5143.9 518.442 3
 -2 -28 0 5463.57 502.283 3
 -2 -28 1 277.022 162.896 3
 -2 -28 -1 303.073 145.341 3
 2 -28 1 102.683 122.865 3
 2 -28 -1 271.737 178.063 3
 -2 -28 2 7965.43 585.034 3
 2 -28 -2 8753.04 681.603 3
 2 -28 2 7859.82 596.659 3
 -2 -28 -2 7999.1 605.198 3
 2 -28 3 17407.3 881.209 3
 -2 -28 3 19441.9 917.406 3
 -2 -28 -3 17334.9 906.309 3
 2 -28 -3 18461.9 1015.63 3
 -2 -28 -4 67229.1 1823.38 3
 2 -28 4 63982 1694.82 3
 -2 -28 4 67667.7 1727.72 3
 2 -28 5 16126.6 893.307 3
 -2 -28 -5 15641.7 891.337 3
 2 -28 -5 17049.7 1054.7 3
 -2 -28 5 15747.2 879.54 3
 -2 -28 -6 46083.6 1484.35 4
 2 -28 6 44378.6 1513.05 3
 2 -28 7 4323.54 501.563 3
 -2 -28 7 3490.78 448.449 3
 -2 -28 -7 4802.25 516.78 4
 2 -28 8 10919.4 824.112 3
 -2 -28 -8 11652.7 831.683 4
 -2 -28 -9 2629.55 440.704 4
 -2 -28 -10 1384.81 349.776 4
 -2 -28 -11 1619.63 388.024 4
 -2 -28 -12 9728.68 809.189 4
 2 -28 13 14498.5 956.621 3
 -2 -28 -13 12555.2 911.788 4
 2 -28 14 22897.2 1103.55 3
 2 28 -14 23925.2 1094.75 5
 -2 -28 14 22861.9 1108.5 3
 2 -28 15 10675 717.37 3
 -2 -28 15 11266.1 712.743 3
 2 28 -15 12254.6 742.482 5
 -2 28 -15 12458.6 789.674 5
 2 -28 16 2742.19 333.066 3
 2 28 -16 2914.19 352.909 5
 -2 -28 16 2477.42 307.073 3
 -2 28 -16 3492.97 373.305 5
 2 -30 0 34191.7 1343.01 3
 -2 -30 0 35350.2 1321.56 3
 -2 -30 1 11546.7 739.542 3
 2 -30 -1 10861.6 781.809 3
 2 -30 1 10279.8 727.429 3
 -2 -30 -1 10803.9 719.963 3
 2 -30 -2 14.4726 184.866 3
 -2 -30 2 241.025 177.642 3
 2 -30 2 234.336 162.821 3
 -2 -30 -2 167.575 134.014 3
 2 -30 -3 8247.81 710.823 3
 -2 -30 3 7539.84 602.564 3
 -2 -30 -3 7969.76 622.394 3
 2 -30 3 7449.17 595.018 3
 -2 -30 4 -48.6537 166.737 3
 2 -30 4 172.871 152.275 3
 2 -30 -4 -253.567 223.741 3
 -2 -30 -4 235.825 159.59 3
 -2 -30 -5 11698.3 769.839 4
 -2 -30 5 12196.1 775.976 3
 2 -30 -5 13128.5 948.207 3
 2 -30 5 14900.8 865.457 3
 2 -30 6 3853.28 473.534 3
 -2 -30 6 3240.78 422.185 3
 -2 -30 -6 3042.06 418.476 4
 -2 -30 7 1722.96 360.789 3
 -2 -30 -7 1076.98 276.533 4
 2 -30 7 1518.79 338.363 3
 -2 -30 8 3798.87 491.821 3
 2 -30 8 3854.78 477.933 3
 -2 -30 -8 4561.12 551.629 4
 2 -30 9 19682.4 1117.28 3
 -2 -30 -9 20497.8 1109.96 4
 -2 -30 9 20469.1 1098.52 3
 -2 -30 10 13977.9 918.628 3
 2 -30 10 14917.7 960.928 3
 -2 -30 -10 13903.7 954.056 4
 -2 -30 -11 3238.36 475.359 4
 -2 -30 11 3269.91 464.353 3
 2 -30 11 3342.07 467.07 3
 -2 -30 12 -12.6229 128.725 3
 -2 -30 -12 -119.617 202.463 4
 -2 -30 13 8809.35 691.653 3
 2 -30 13 9039.17 698.979 3
 -2 -30 14 9706.55 690.127 3
 2 -30 14 10545.1 714.698 3
 2 30 -14 11945.1 757.412 5
 2 30 -15 4985.75 443.962 5
 -2 30 -15 4780.44 456.472 5
 -2 -30 15 4202.97 402.584 3
 2 -30 15 5014.73 450.689 3
 -2 -32 0 17343.6 963.125 3
 2 -32 0 18976.8 1058.69 3
 2 -32 -1 63471.5 1912.66 3
 -2 -32 1 63267.8 1816.8 3
 -2 -32 -1 68156.8 1894.78 3
 -2 -32 2 4910.56 498.248 3
 2 -32 -2 5535.49 565.061 3
 2 -32 2 6409.05 594.093 3
 -2 -32 -2 4512.57 490.388 3
 -2 -32 3 13989.6 838.774 3
 -2 -32 -3 13502.8 870.073 3
 2 -32 3 16824.5 935.421 3
 2 -32 -3 14827.6 965.544 3
 2 -32 4 329.541 179.106 3
 -2 -32 4 246.427 136.697 3
 -2 -32 -4 23.2256 157.505 3
 2 -32 -4 65.9004 165.085 3
 -2 -32 5 4753.33 499.416 3
 2 -32 -5 6547.91 708.975 3
 2 -32 5 6214.53 582.613 3
 2 -32 6 1758.44 313.033 3
 -2 -32 6 1975.39 331.831 3
 2 -32 7 419.872 184.63 3
 -2 -32 7 432.698 183.567 3
 -2 -32 -8 13852.6 902.596 4
 -2 -32 8 13447.4 870.31 3
 2 -32 8 12867.7 858.154 3
 2 -32 9 63052.8 1875.38 3
 -2 -32 9 67805.9 1927.26 3
 -2 -32 -9 62667.5 1909.85 4
 2 -32 10 15698.8 971.054 3
 -2 -32 10 15776 969.638 3
 -2 -32 11 20747.4 1056.05 3
 2 -32 11 22748.9 1114.19 3
 2 -32 12 1215.36 287.201 3
 -2 -32 12 1466.75 335.134 3
 -2 -32 13 -17.3371 111.368 3
 2 -32 13 213.743 172.772 3
 -2 -32 14 261.374 140.755 3
 2 -32 14 141.928 120.414 3
 2 32 -14 187.452 113.655 5
 -2 32 -15 772.085 189.009 5
 2 -32 15 536.645 155.092 3
 -2 -34 0 6591.17 629.545 3
 2 -34 0 9611.94 825.642 3
 2 -34 -1 132895 2861.76 3
 -2 -34 -1 117026 2541.09 3
 -2 -34 1 108443 2448 3
 2 -34 1 131563 2762.92 3
 2 -34 -2 14149.4 979.232 3
 -2 -34 2 10795.6 790.609 3
 -2 -34 -2 13249.1 905.101 3
 2 -34 2 11541 844.39 3
 2 -34 3 6710.52 614.815 3
 -2 -34 -3 7234.61 666.898 3
 2 -34 -3 7058.42 694.57 3
 -2 -34 3 7156.6 623.788 3
 -2 -34 -4 79.9012 184.676 3
 2 -34 4 -36.7744 156.783 3
 2 -34 -4 58.2357 213.916 3
 -2 -34 4 28.8735 128.169 3
 2 -34 5 160.697 168.743 3
 -2 -34 5 71.4446 152.026 3
 2 -34 6 1603.79 343.109 3
 -2 -34 6 1127.4 281.396 3
 -2 -34 7 10896 750.783 3
 2 -34 7 10327.9 747.853 3
 2 -34 8 4416.79 524.759 3
 -2 -34 8 3741.51 490.732 3
 -2 -34 9 82688.5 2038.99 3
 2 -34 9 85067.6 2100.47 3
 -2 -34 10 13745 861.811 3
 2 -34 10 13924.3 914.412 3
 -2 -34 11 36566.5 1297.06 3
 2 -34 11 37953.8 1359.44 3
 -2 -34 12 2626.63 374.259 3
 2 -34 12 3172.16 402.978 3
 -2 -34 13 3216.4 353.549 3
 2 -34 13 3515.23 373.157 3
 2 34 -14 283.631 130.981 5
 2 -34 14 57.2073 86.1067 3
 -2 -34 14 278.014 137.515 3
 -2 34 -14 111.916 126.925 5
 -2 -36 0 5452.64 600.981 3
 2 -36 0 4968.09 621.166 3
 -2 -36 -1 185998 3277.36 3
 2 -36 -1 179848 3359.06 3
 -2 -36 1 182083 3191.4 3
 2 -36 1 175364 3251.1 3
 -2 -36 2 618.873 243.385 3
 2 -36 -2 949.506 293.501 3
 2 -36 2 1256.78 324.627 3
 -2 -36 -2 663.326 239.879 3
 -2 -36 3 4010.43 493.851 3
 -2 -36 -3 3851.27 493.918 3
 2 -36 3 3569.92 469.33 3
 2 -36 -3 3741.82 506.767 3
 -2 -36 4 393.26 157.765 3
 2 -36 -4 575.37 208.78 3
 2 -36 4 517.682 211.18 3
 2 -36 5 21038.6 1071.68 3
 -2 -36 5 21909.4 1063.68 3
 -2 -36 6 997.744 230.5 3
 2 -36 6 1935.87 392.442 3
 -2 -36 7 2937.1 387.172 3
 2 -36 7 2676.32 393.493 3
 2 -36 8 2550.06 401.87 3
 -2 -36 8 2381.91 396.464 3
 -2 -36 9 67964.2 1784.18 3
 2 -36 9 68359 1837.8 3
 2 -36 10 5643.64 569.305 3
 -2 -36 10 4754.6 529.947 3
 2 -36 11 33573.3 1208.14 3
 -2 -36 11 32489.2 1157.27 3
 -2 -36 12 1388.19 254.557 3
 2 -36 12 1127.59 266.968 3
 2 -36 13 1282.49 213.02 3
 -2 -36 13 1246.87 199.987 3
 2 36 -13 1485.38 269.17 5
 -2 -38 0 14637.4 942.309 3
 2 -38 0 13251.5 927.368 3
 2 -38 1 19919 1113.49 3
 -2 -38 -1 21306.1 1120.2 3
 2 -38 -1 21172.3 1164.09 3
 -2 -38 1 20190.2 1076.12 3
 2 -38 -2 331.984 198.719 3
 -2 -38 -2 271.737 202.81 3
 2 -38 2 185.841 190.258 3
 -2 -38 2 239.101 208.692 3
 2 -38 -3 4176.56 560.227 3
 -2 -38 -3 4102.76 489.21 3
 2 -38 3 3708.84 472.452 3
 -2 -38 3 3717.08 458.128 3
 2 -38 4 3758.25 497.981 3
 -2 -38 4 4086.51 487.676 3
 2 -38 5 8199.93 663.064 3
 -2 -38 5 8483.96 666.621 3
 2 -38 6 1023.44 240.96 3
 -2 -38 6 1024.91 236.389 3
 -2 -38 7 2080.35 342.835 3
 2 -38 7 1868.07 305.884 3
 2 -38 8 2724.29 401.189 3
 -2 -38 8 2685.09 386.163 3
 -2 -38 9 21068.3 953.771 3
 2 -38 9 21125 989.157 3
 2 -38 10 4006.55 438.024 3
 -2 -38 10 3618.06 411.799 3
 2 -38 11 5240.42 458.82 3
 -2 -38 11 4517.68 417.814 3
 2 -38 12 167.916 113.931 3
 -2 -38 12 181.148 113.489 3
 -2 -40 0 1667.42 331.029 3
 2 -40 0 1697.13 341.431 3
 2 -40 -1 8467.71 731.899 3
 2 -40 1 8059.72 702.257 3
 -2 -40 -1 8846.49 708.771 3
 -2 -40 1 8673.64 684.17 3
 2 -40 2 1423.68 333.939 3
 -2 -40 2 1309.26 296.244 3
 -2 -40 -2 1186.85 259.063 3
 2 -40 -2 1076.77 297.442 3
 2 -40 3 23934.1 1162.41 3
 -2 -40 3 24695.6 1136.04 3
 2 -40 -3 24863.8 1289.45 3
 -2 -40 4 12698.6 817.522 3
 2 -40 4 13733.4 896.059 3
 -2 -40 5 32859 1289.28 3
 2 -40 5 31636.1 1298.52 3
 -2 -40 6 7805.76 607.766 3
 2 -40 6 8710.98 677.85 3
 -2 -40 7 1567.02 273.377 3
 2 -40 7 1379.27 271.622 3
 2 -40 8 1296.17 248.603 3
 -2 -40 8 1455.89 258.644 3
 -2 -40 9 3766.08 391.989 3
 2 -40 9 3601.77 393.154 3
 2 -40 10 735.011 181.872 3
 -2 -40 10 606.635 181.548 3
 -2 -40 11 471.554 153.574 3
 2 -40 11 -239.242 118.352 3
 2 -42 0 273.027 145.186 3
 -2 -42 0 648.682 219.654 3
 -2 -42 -1 1369.53 294.413 3
 2 -42 -1 1369.42 276.6 3
 2 -42 1 1363.1 306.12 3
 -2 -42 1 1544.38 292.084 3
 2 -42 2 6182 571.468 3
 -2 -42 2 6941.29 594.451 3
 2 -42 -2 6835.91 654.694 3
 2 -42 3 14499.6 887.488 3
 -2 -42 3 15191.2 861.87 3
 -2 -42 4 42761 1404.33 3
 2 -42 4 41756.6 1447.89 3
 2 -42 5 27397.8 1163.69 3
 -2 -42 5 27943.6 1123.22 3
 2 -42 6 19524.9 961.541 3
 -2 -42 6 19063.3 904.028 3
 -2 -42 7 3982.6 415.401 3
 2 -42 7 3917.14 426.552 3
 2 -42 8 133.882 94.5766 3
 -2 -42 8 28.9892 111.56 3
 2 -42 9 221.293 117.287 3
 -2 -42 9 87.3177 77.9109 3
 2 -42 10 24.8131 83.8657 3
 2 -44 0 1948.61 392.75 3
 -2 -44 0 1996.28 310.015 3
 2 -44 1 149.327 152.56 3
 2 -44 -1 303.755 210.424 3
 -2 -44 1 311.745 162.515 3
 2 -44 2 6300.32 560.549 3
 -2 -44 2 6756.74 542.28 3
 2 -44 3 5107.18 493.917 3
 -2 -44 3 5029.81 469.75 3
 2 -44 4 39543.5 1328.79 3
 -2 -44 4 39807.8 1270.24 3
 2 -44 5 10027.6 672.993 3
 -2 -44 5 9772 621.678 3
 -2 -44 6 32207.3 1078.43 3
 2 -44 6 33502.2 1165.18 3
 -2 -44 7 3967.57 372.583 3
 2 -44 7 4768.47 432.005 3
 2 -44 8 821.38 183.738 3
 -2 -44 8 543.847 139.921 3
 2 -46 0 15393.3 843.64 3
 -2 -46 1 160.539 104.779 3
 2 -46 1 223.087 161.342 3
 2 -46 2 -77.0966 99.9089 3
 -2 -46 2 153.663 106.127 3
 2 -46 3 431.952 176.061 3
 -2 -46 3 280.8 142.248 3
 -2 -46 4 15449.6 723.7 3
 2 -46 4 15798.2 780.961 3
 -2 -46 5 1828.36 250.877 3
 2 -46 5 2164.82 307.401 3
 2 -46 6 24346.7 910.379 3
 2 -48 1 396.657 149.371 3
 2 -48 2 5064.89 426.174 3
 2 -48 3 128.414 114.224 3
 3 1 0 3444.06 180.941 2
 3 -1 -1 166092 979.094 2
 -3 1 1 163152 1014.46 2
 3 -1 -2 15259.4 358.279 1
 3 1 -2 15546.7 386.48 1
 -3 -1 3 43936.4 703.643 1
 -3 1 3 42848.8 668.839 1
 3 1 -3 42021.5 814.463 1
 3 -1 -3 43338.9 816.967 1
 3 1 -4 -395.869 181.43 1
 -3 1 4 -528.751 132.972 1
 -3 -1 4 -454.07 156.319 1
 3 -1 -4 -340.288 171.862 1
 3 1 -5 3515.62 344.17 1
 3 -1 -5 3646.76 344.431 1
 -3 1 5 3810.4 279.595 1
 3 -1 5 3846.52 387.355 1
 -3 -1 5 3612.8 284.407 1
 3 1 -6 659.138 197.168 1
 3 -1 -6 800.739 201.99 1
 -3 -1 6 532.899 136.576 1
 3 -1 6 571.834 161.422 1
 -3 1 6 750.168 149.286 1
 3 1 6 500.303 174.842 1
 3 -1 7 7445.1 596.58 1
 -3 -1 7 6933.47 461.121 1
 3 1 -7 7136.57 632.597 1
 -3 1 7 6680.96 443.114 1
 3 1 7 7845.34 620.602 1
 -3 1 8 4033.26 399.638 1
 3 -1 -9 94773.4 1658.29 5
 -3 -1 -9 88800.7 1575.83 5
 3 1 -9 88736.9 1632.68 5
 -3 -1 -9 94753.1 1753.51 4
 3 -1 -10 5126.25 469.1 4
 3 1 -10 5222.17 470.416 5
 3 -1 -10 4832.93 452.115 5
 -3 -1 -10 4558.79 449.23 5
 -3 -1 -10 4542.53 463.589 4
 -3 1 -10 4489.01 439.905 5
 -3 1 -10 5093.96 460.551 4
 -3 1 -11 54070.4 1455.22 5
 -3 -1 -11 53892.5 1484.45 4
 -3 -1 -11 56172.3 1435.38 5
 3 -1 -11 53101 1459 5
 3 1 -11 55743.2 1474.41 5
 -3 1 -11 55004.4 1463.49 4
 3 -1 -12 2721.72 388.762 5
 -3 -1 -12 3000.68 413.379 4
 -3 -1 -12 2974.81 397.49 5
 -3 1 -12 3253.97 409.04 4
 -3 1 -12 3130.2 428.023 5
 3 1 -12 2980.92 429.03 5
 3 1 -13 17118.5 918.67 5
 -3 -1 -13 15824.1 864.55 4
 -3 -1 -13 16357.1 881.914 5
 -3 1 -13 16784.3 917.417 5
 -3 1 -13 17027.8 873.68 4
 3 -1 -13 14067.9 881.437 5
 -3 -1 -14 799.497 259.123 4
 3 -1 -14 751.187 262.359 5
 -3 1 -14 1065.97 278.034 5
 -3 -1 -14 735.081 253.122 5
 3 1 -14 838.016 309.065 5
 -3 -1 -15 4147.4 482.57 5
 -3 1 -15 4975.14 518.517 5
 3 1 -15 4483.2 490.498 5
 3 -1 -15 3903.37 448.985 5
 -3 -1 -16 2656 397.34 5
 3 -1 -16 2271.06 383.05 5
 -3 1 -16 2649.32 397.888 5
 3 1 -16 2224.32 386.247 5
 -3 -1 -17 12874.7 779.001 5
 -3 1 -17 12177.3 763.455 5
 3 -1 -17 11346.6 813.446 5
 3 1 -17 12348.5 779.449 5
 3 -1 -18 1633.22 278.383 5
 -3 1 -18 1601.67 281.313 5
 -3 -1 -18 1866.36 285.113 5
 3 1 -18 1743.46 321.446 5
 3 1 -19 7212.92 526.212 5
 3 -1 -19 5834.8 482.627 5
 -3 -1 -19 6264.16 438.029 5
 -3 1 -19 6323.32 447.555 5
 3 3 0 85006.4 829.082 2
 3 -3 -1 3656.72 142.409 2
 -3 3 1 3520.66 159.38 2
 3 -3 -2 7135.79 225.985 1
 3 3 -2 7040.44 283.479 1
 3 -3 -3 75986.7 1018.63 1
 -3 3 3 74894.8 801.399 1
 3 3 -4 22157.5 764.938 1
 -3 3 4 22691.8 557.748 1
 3 -3 -4 21053.4 662.29 1
 3 -3 -5 6870.57 450.364 1
 3 3 -5 5855.46 440.347 1
 -3 -3 5 6355.32 367.241 1
 -3 3 5 6668.29 344.602 1
 3 -3 5 6361.31 497.615 1
 -3 -3 6 2691.93 273.85 1
 3 3 6 2506.03 338.222 1
 -3 3 6 2587.97 247.777 1
 3 -3 6 2284.01 316.377 1
 3 3 -6 2513.03 360.842 1
 3 -3 -6 2519.58 320.475 1
 3 -3 7 15591.6 869.177 1
 3 3 -7 16298.6 945.138 1
 3 3 7 16829.3 903.98 1
 -3 3 7 16288.2 656.829 1
 -3 -3 7 16195 715.445 1
 -3 3 8 9587.66 553.525 1
 3 3 8 10012.1 758.697 1
 -3 -3 -9 25122.8 932.872 4
 3 -3 -9 24643.8 853.792 5
 -3 -3 -9 24230 817.718 5
 3 3 -9 24338.3 878.681 5
 -3 -3 -10 10073.3 636.33 4
 -3 -3 -10 10180.6 590.979 5
 3 3 -10 10175.6 638.214 5
 -3 3 -10 10523.4 612.791 4
 3 -3 -10 9863.65 603.661 5
 3 -3 -10 11199.2 658.355 4
 -3 3 -11 9150.63 604.885 4
 -3 3 -11 8658.66 603.657 5
 3 3 -11 8298.75 596.917 5
 -3 -3 -11 9130.74 576.847 5
 3 -3 -11 9269.38 599.514 5
 3 -3 -11 9343.97 631.938 4
 -3 -3 -11 8766.89 615.898 4
 3 -3 -12 2918.6 403.098 4
 -3 -3 -12 2466.73 340.66 5
 3 -3 -12 1987.55 368.974 5
 -3 3 -12 2360.45 327.561 4
 3 3 -12 2088.19 349.824 5
 -3 -3 -12 2781.79 391.147 4
 -3 3 -12 2189.92 352.328 5
 -3 -3 -13 -29.5041 162.274 4
 3 -3 -13 163.885 149.181 5
 -3 3 -13 122.994 167.963 5
 3 3 -13 9.77464 137.607 5
 -3 -3 -13 19.7189 122.414 5
 -3 -3 -14 116.129 168.633 5
 3 -3 -14 -62.4507 172.658 5
 -3 3 -14 6.67149 146.415 5
 -3 -3 -14 221.577 179.194 4
 3 3 -14 34.5969 169.24 5
 -3 -3 -15 365.235 174.459 5
 3 -3 -15 556.34 243.761 5
 -3 -3 -15 480.496 202.48 4
 -3 3 -15 245.056 149.243 5
 3 3 -15 245.89 179.754 5
 3 -3 -16 1920.1 361.087 5
 3 3 -16 1038.47 296.36 5
 -3 3 -16 1825.62 362.901 5
 -3 -3 -16 1293.64 272.527 5
 3 3 -17 1841.55 358.993 5
 -3 -3 -17 1904.26 302.277 5
 3 -3 -17 1441.85 299.889 5
 -3 3 -17 1836.86 329.603 5
 -3 -3 -18 1937.51 282.419 5
 3 3 -18 2561.41 357.018 5
 -3 3 -18 1614.23 293.001 5
 3 -3 -18 2048.32 321.656 5
 3 -3 -19 5041.97 442.306 5
 3 3 -19 4695.57 425.382 5
 -3 3 -19 4481.82 385.311 5
 -3 -3 -19 4132.51 352.291 5
 -3 -5 0 177.919 68.3641 2
 3 5 0 102.367 46.4183 2
 3 5 -1 63352.6 747.199 1
 -3 -5 1 64967.3 718.842 2
 3 5 1 64742.4 883.652 2
 -3 5 2 11383.4 243.468 2
 3 5 -2 10772.7 383.676 1
 3 -5 -2 11130 267.431 1
 3 5 -3 181040 1900.57 1
 3 -5 -3 190174 1517.32 1
 3 -5 -4 106138 1435.28 1
 -3 5 4 104730 1087.44 1
 -3 -5 5 1310.71 180.937 1
 -3 5 5 1164.92 147.982 1
 3 5 -5 1173.14 224.348 1
 3 -5 -5 1420.13 214.088 1
 3 -5 5 1268.32 240.238 1
 3 5 -6 5439 499.808 1
 -3 -5 6 5549.82 391.131 1
 -3 5 6 5520.6 341.908 1
 3 -5 6 5441.95 480.122 1
 -3 -5 7 128.102 83.3324 1
 -3 5 7 189.572 88.0417 1
 3 5 7 84.1474 143.765 1
 3 -5 7 38.4444 103.305 1
 3 5 -7 284.313 172.081 1
 3 -5 -8 19517.3 706.324 5
 3 5 8 17544.6 994.207 1
 -3 5 8 16935.9 693.944 1
 3 -5 -9 204.824 129.457 4
 -3 -5 -9 130.743 120.626 4
 -3 -5 -9 82.0602 88.9798 5
 3 -5 -9 70.0238 97.9498 5
 -3 -5 -10 90.915 94.2758 5
 3 -5 -10 -103.33 118.582 5
 -3 5 -10 45.7217 99.0178 4
 3 -5 -10 -63.4215 107.86 4
 3 5 -10 39.7134 101.265 5
 -3 -5 -10 -127.433 153.95 4
 -3 -5 -11 307.986 182.457 4
 3 -5 -11 408.188 186.906 5
 -3 -5 -11 137.777 128.453 5
 3 -5 -11 439.137 214.766 4
 3 5 -11 172.917 151.494 5
 3 5 -12 3996.23 468.169 5
 -3 -5 -12 3739.78 441.979 4
 -3 -5 -12 3222.81 392.256 5
 3 -5 -12 3850.32 446.894 4
 -3 5 -12 4208.04 453.246 5
 3 -5 -12 3387.63 400.029 5
 3 -5 -13 8432.16 683.082 4
 -3 5 -13 7943.81 645.744 5
 3 -5 -13 7240.19 589.043 5
 3 5 -13 7413.48 624.829 5
 -3 -5 -13 8197.2 586.923 5
 3 5 -14 4617.26 523.544 5
 3 -5 -14 4655.98 521.539 4
 3 -5 -14 4042.85 477.707 5
 -3 5 -14 4306.21 528.519 5
 -3 -5 -14 2908.47 366.639 5
 -3 -5 -14 4474.52 513.127 4
 -3 5 -15 9393.28 741.775 5
 3 -5 -15 10116.5 729.449 5
 -3 -5 -15 10301.8 702.052 5
 3 5 -15 7609.64 722.808 5
 -3 -5 -15 9644.41 740.689 4
 3 5 -16 44.1968 136.941 5
 -3 5 -16 107.605 156.473 5
 3 -5 -16 304.529 181.105 5
 -3 -5 -16 468.349 193.415 5
 -3 -5 -16 399.264 213.252 4
 3 -5 -17 543.76 206.7 5
 -3 -5 -17 649.722 181.188 5
 3 5 -17 318.089 182.712 5
 -3 5 -17 409.724 207.806 5
 -3 -5 -18 1831.85 273.243 5
 -3 5 -18 1383.23 275.684 5
 3 -5 -18 1671.19 310.046 5
 3 5 -18 2130.35 322.21 5
 3 5 -19 330.446 157.294 5
 -3 5 -19 162.77 97.8227 5
 -3 -7 0 59438.6 832.232 2
 3 -7 -1 40881.9 380.615 2
 3 7 -1 42188.4 673.562 1
 -3 -7 1 42919.7 621.74 2
 3 7 -2 3329.28 228.416 1
 3 -7 -2 3704.51 145.743 1
 3 -7 3 4406.97 365.934 1
 3 -7 -3 4938.5 236.724 1
 3 7 -3 4276.76 338.987 1
 -3 7 4 133332 1087.34 1
 3 -7 4 131678 2076.75 1
 3 7 -5 735.87 203.349 1
 3 -7 5 719.167 198.623 1
 -3 7 5 796.266 111.818 1
 -3 -7 5 775.825 153.902 1
 3 -7 6 13994.8 779.836 1
 -3 7 6 14370.2 507.214 1
 -3 -7 6 13751.2 625.076 1
 3 7 -6 14235.7 825.492 1
 3 7 -7 12820.2 877.604 1
 -3 7 7 13257.9 552.536 1
 3 7 7 14244.2 840.699 1
 3 7 8 3683.65 447.735 1
 -3 7 8 3661.46 314.365 1
 -3 -7 -8 4070.63 389.695 4
 3 -7 -8 4183.85 347.273 5
 -3 -7 -9 861.411 163.393 5
 3 -7 -9 1005.11 203.998 5
 3 -7 -9 998.431 214.516 4
 -3 -7 -9 1222.69 246.58 4
 3 -7 -10 5319.63 434.457 5
 -3 -7 -10 5677.87 505.517 4
 -3 -7 -10 5423.27 418.295 5
 3 -7 -10 5214.94 468.265 4
 3 -7 -11 23270.1 943.478 5
 3 7 -11 21846.2 996.816 5
 -3 -7 -11 25582 923.14 5
 3 -7 -11 23778.2 1042.29 4
 -3 -7 -11 24000.7 1064.64 4
 3 7 -12 13460.4 842.053 5
 -3 -7 -12 16445 773.001 5
 3 -7 -12 15017.9 865.448 4
 -3 -7 -12 15135.5 886.418 4
 3 -7 -12 13656.7 775.905 5
 3 -7 -13 8918.92 646.034 5
 3 -7 -13 8109.84 688.068 4
 -3 7 -13 7929.16 687.593 5
 -3 -7 -13 5885.25 507.878 5
 3 7 -13 7947.31 680.812 5
 -3 -7 -13 6500.8 609.807 4
 3 -7 -14 22298.5 1088.53 5
 -3 -7 -14 22539.5 1141.67 4
 3 7 -14 23523.4 1183.2 5
 3 -7 -14 23905.9 1145.35 4
 -3 7 -14 25192.2 1205.61 5
 -3 7 -15 17669.2 1040.85 5
 3 -7 -15 16890.3 905.484 5
 3 7 -15 17670.9 1023.22 5
 3 -7 -15 16868.7 984.135 4
 -3 -7 -15 15601.9 962.132 4
 -3 -7 -15 17607.7 910.503 5
 -3 -7 -16 4275.35 450.108 5
 3 -7 -16 4648.87 477.057 5
 -3 -7 -16 4926.24 537.525 4
 3 7 -16 4557.79 555.933 5
 -3 7 -16 5429.88 554.452 5
 -3 -7 -17 473.354 179.395 5
 3 7 -17 273.291 162.76 5
 -3 7 -17 286.583 175.718 5
 3 -7 -17 427.138 173.937 5
 -3 -7 -17 19.8488 173.189 4
 3 -7 -18 1589.74 280.938 5
 3 7 -18 851.122 245.433 5
 -3 7 -18 1639.17 297.445 5
 -3 7 -19 543.932 157.28 5
 3 7 -19 526.771 184.907 5
 3 -9 0 98514.2 994.654 1
 -3 -9 0 101703 1135.58 2
 -3 -9 1 6984.58 268.256 2
 3 9 1 5832.52 252.596 2
 3 9 -1 5740.93 293.061 1
 3 -9 1 7381.78 347.787 1
 3 -9 2 71375.7 1252.78 1
 3 9 -2 68957 1139.59 1
 3 9 -3 6100.1 428.93 1
 3 -9 3 6272.78 427.402 1
 -3 9 3 4968.27 145.285 2
 -3 -9 3 5473.24 299.044 1
 -3 -9 4 81290.2 1261.42 1
 3 9 -4 80560.3 1636.99 1
 3 -9 4 80913.4 1621.01 1
 3 9 -5 22589.9 959.361 1
 -3 -9 5 23866.2 762.824 1
 3 -9 5 23894.7 957.652 1
 3 -9 6 34062.3 1231.69 1
 -3 9 6 35163.5 712.133 1
 -3 -9 6 33163.4 983.164 1
 3 9 -6 33618.3 1318.16 1
 3 9 7 17402.7 931.247 1
 -3 9 7 16546.4 552.084 1
 3 9 -7 15744.4 1003.15 1
 -3 -9 -8 19094.1 820.616 4
 3 -9 -8 17303.6 724.144 5
 3 9 8 18090.4 993.221 1
 3 -9 -8 19668.9 822.285 4
 3 -9 -9 1669.14 307.902 4
 3 -9 -9 1745.22 248.457 5
 -3 -9 -9 1593.82 223.877 5
 -3 -9 -9 1694.33 282.735 4
 -3 -9 -10 19723.9 945.886 4
 3 -9 -10 21091.9 834.501 5
 3 -9 -10 20878.2 942.735 4
 -3 -9 -10 20440.7 783.283 5
 3 -9 -11 3083.66 377.302 5
 -3 -9 -11 2818.38 408.361 4
 -3 -9 -11 2805.32 344.259 5
 3 -9 -11 3388.47 446.407 4
 3 -9 -12 34073.3 1194.59 5
 -3 -9 -12 27325.5 998.459 5
 3 -9 -12 33450.2 1323.5 4
 -3 -9 -12 27673.9 1206.97 4
 3 9 -12 32375.1 1295.97 5
 -3 -9 -13 4376.09 429.99 5
 3 9 -13 4799.06 551.838 5
 3 -9 -13 4985.96 576.295 4
 -3 -9 -13 3655.69 502.911 4
 3 -9 -13 4581.43 503.226 5
 -3 9 -13 5831.12 595.091 5
 -3 9 -14 35604.3 1446.87 5
 3 -9 -14 32611.5 1218.73 5
 3 -9 -14 31128.7 1377.41 4
 -3 -9 -14 32724.7 1390.71 4
 3 9 -14 33536.3 1406.61 5
 3 -9 -15 4839.92 524.361 5
 -3 9 -15 4435.65 538.791 5
 3 -9 -15 3888.25 533.054 4
 -3 -9 -15 4260.53 557.231 4
 3 9 -15 4669.32 595.066 5
 -3 -9 -15 5588.21 487.961 5
 -3 -9 -16 6179.3 518.089 5
 -3 -9 -16 6977.82 638.963 4
 3 9 -16 6911.77 667.117 5
 -3 9 -16 7383.53 665.024 5
 3 -9 -16 7316.11 594.036 5
 -3 9 -17 6607.28 627.39 5
 -3 -9 -17 5383.37 552.659 4
 -3 -9 -17 6269.02 490.234 5
 3 -9 -17 6064.87 538.848 5
 3 9 -17 7215.35 665.319 5
 -3 9 -18 1781.8 296.109 5
 3 9 -18 1296.19 281.113 5
 -3 9 -19 606.02 165.959 5
 3 9 -19 522.786 165.482 5
 -3 -11 0 3493.95 232.503 2
 3 -11 0 3968.02 188.958 1
 -3 -11 1 430.203 75.596 2
 3 -11 1 418.798 98.2713 1
 3 11 -1 249.007 82.388 1
 3 -11 2 19293.9 651.69 1
 3 11 -2 21062.5 707.404 1
 3 -11 3 26.5581 97.1104 1
 3 11 -3 -31.8715 111.588 1
 3 11 3 -111.494 94.5723 2
 3 11 -4 71709 1627.18 1
 3 -11 4 72887.7 1556.53 1
 -3 -11 4 74352.9 1258.27 1
 -3 -11 5 899.081 176.1 1
 3 -11 5 818.428 181.343 1
 3 11 -5 820.326 216.999 1
 -3 -11 6 163781 2199.33 1
 3 -11 6 170864 2850.19 1
 3 11 -6 163844 3023.06 1
 3 11 7 1230.41 262.108 1
 -3 -11 -7 1182.93 212.375 4
 3 -11 -7 1157.87 201.609 5
 3 -11 -7 1086.64 217.543 4
 -3 -11 -8 341.687 128.7 4
 3 -11 -8 610.746 156.665 5
 3 11 8 648 224.309 1
 3 -11 -8 602.16 180.974 4
 -3 -11 -9 6037.14 535.416 4
 3 -11 -9 7138.1 484.183 5
 -3 -11 -9 7021.59 471.18 5
 3 -11 -9 6231.89 534.79 4
 3 -11 -10 3078.45 392.7 4
 3 -11 -10 3167.63 353.812 5
 -3 -11 -10 3611.63 344.028 5
 -3 -11 -10 3272.46 404.312 4
 -3 -11 -11 2130.55 366.316 4
 -3 -11 -11 2037.42 295.211 5
 3 -11 -11 1845.26 272.673 5
 3 -11 -11 1599.9 317.924 4
 3 -11 -12 5066.05 475.678 5
 3 -11 -12 4709.83 560.462 4
 3 11 -12 4552.57 521.086 5
 -3 -11 -12 4207.86 509.444 4
 -3 -11 -12 3998.59 392.795 5
 -3 -11 -13 1721.18 301.775 5
 -3 -11 -13 1543.5 342.242 4
 3 11 -13 2476.35 409.668 5
 3 -11 -13 2427.33 370.346 5
 -3 -11 -14 2137.75 293.494 5
 -3 11 -14 2809.96 429.723 5
 3 11 -14 2421.14 432.095 5
 3 -11 -14 2846.11 383.36 5
 -3 -11 -14 2699.1 460.918 4
 3 -11 -14 2828.63 446.222 4
 -3 -11 -15 1115.7 237.963 5
 -3 11 -15 1146.26 325.393 5
 3 -11 -15 1430.71 290.768 5
 -3 -11 -15 1432.58 367.27 4
 3 11 -15 1388.42 343.05 5
 3 -11 -15 1307.07 355.76 4
 -3 11 -16 12290.6 863.628 5
 3 -11 -16 12244.3 752.755 5
 -3 -11 -16 13135.1 708.077 5
 -3 -11 -16 12171.4 832.767 4
 3 11 -16 12609.7 869.138 5
 -3 11 -17 321.624 210.311 5
 -3 -11 -17 324.143 194.114 4
 3 11 -17 401.805 208.4 5
 -3 11 -18 1761.24 311.397 5
 3 11 -18 2133.71 335.365 5
 -3 -11 -18 1842.03 299.373 4
 3 11 -19 332.017 145.166 5
 3 -13 0 1337.54 106.73 1
 3 13 0 1675.33 185.454 1
 -3 -13 0 1528.55 166.844 2
 3 -13 1 333.572 100.503 1
 -3 -13 1 502.45 109.978 2
 3 13 -1 467.902 116.17 1
 3 -13 2 6600.03 393.467 1
 3 13 -2 7771.21 478.538 1
 3 -13 3 1.03632 94.1409 1
 3 13 -3 80.3691 120.546 1
 3 13 3 -51.7633 68.4988 2
 3 13 4 1036.61 159.536 2
 3 13 -4 853.993 217.314 1
 3 -13 4 941.988 187.655 1
 3 13 -5 1113.38 314.619 1
 3 -13 5 741.076 219.565 1
 -3 -13 5 989.515 185.864 1
 3 13 -6 1716.36 358.544 1
 -3 -13 -7 101.854 108.928 4
 3 -13 -7 115.136 99.3041 5
 3 13 7 220.325 157.217 1
 3 -13 -7 180.837 123.422 4
 3 -13 -8 2806.09 294.509 5
 -3 -13 -8 2332.57 244.906 5
 3 -13 -8 2226.13 319.155 4
 -3 -13 -8 2278.86 329.116 4
 -3 -13 -9 435.369 135.857 5
 3 -13 -9 576.922 170.385 5
 3 -13 -9 62.1601 140.333 4
 -3 -13 -9 426.326 195.482 4
 -3 -13 -10 1986.33 347.151 4
 -3 -13 -10 2403.46 281.931 5
 3 -13 -10 2016.37 270.01 5
 3 -13 -10 1982.25 331.306 4
 3 -13 -11 200.74 156.56 5
 -3 -13 -11 600.643 243.928 4
 3 -13 -11 518.126 254.379 4
 -3 -13 -11 261.247 121.313 5
 3 -13 -12 170.01 143.995 5
 3 -13 -12 -44.5278 209.746 4
 -3 -13 -12 -99.4539 202.42 4
 -3 -13 -12 236.16 109.471 5
 3 13 -13 388.873 218.387 5
 3 -13 -13 417.439 191.92 5
 3 -13 -13 731.333 321.756 4
 -3 -13 -13 45.9052 205.134 4
 -3 -13 -13 27.6122 88.7022 5
 3 -13 -14 2354.5 356.614 5
 3 13 -14 2635.85 447.67 5
 -3 -13 -14 1779.37 282.553 5
 -3 -13 -14 2709.84 455.744 4
 -3 13 -14 2411.49 392.368 5
 3 -13 -14 2798.09 450.634 4
 -3 13 -15 660.033 263.625 5
 3 -13 -15 355.758 250.995 4
 3 13 -15 491.383 232.484 5
 3 -13 -15 709.151 219.949 5
 -3 -13 -15 495.548 240.304 4
 3 13 -16 761.902 270.413 5
 -3 -13 -16 748.923 311.633 4
 -3 13 -16 755.159 302.345 5
 -3 13 -17 167.059 179.117 5
 -3 -13 -17 76.9876 178.16 4
 3 13 -17 6.9064 168.983 5
 -3 -13 -18 -87.3835 140.545 4
 3 13 -18 211.999 139.838 5
 3 13 -19 162.688 120.345 5
 3 -15 0 115440 883.912 1
 -3 -15 0 120445 1557.67 2
 3 15 -1 578.466 136.766 1
 3 15 1 666.618 118.465 1
 3 -15 1 585.456 94.2759 1
 -3 -15 1 478.206 98.9566 2
 -3 -15 2 1967.59 189.081 2
 3 15 -2 2284.37 294.341 1
 3 -15 2 1961.06 213.515 1
 3 -15 3 -39.0802 102.548 1
 3 15 3 -23.9134 51.8771 2
 3 -15 4 12816.1 681.348 1
 3 15 4 13024.7 443.002 2
 3 15 -4 12812.6 793.526 1
 3 15 5 6890.29 391.761 2
 3 -15 5 6484.36 537.938 1
 3 15 -5 6661.75 638.609 1
 3 -15 -6 6648.82 491.964 4
 3 15 -6 6606.71 701.259 1
 -3 -15 -6 7113.59 473.568 4
 3 15 6 6551.41 454.871 2
 3 -15 -7 3011.99 350.709 4
 3 -15 -7 2920.67 290.461 5
 -3 -15 -7 3113.22 332.903 4
 -3 -15 -8 21533.2 933.132 4
 3 -15 -8 21585.3 941.284 4
 -3 -15 -8 21960.9 763.481 5
 3 -15 -8 23408.2 858.571 5
 -3 -15 -9 6085.75 450.166 5
 3 -15 -9 6015.02 569.718 4
 -3 -15 -9 7170.55 599.171 4
 3 -15 -9 6963.69 509.554 5
 -3 -15 -10 22353.3 1080.96 4
 3 -15 -10 22740.4 938.077 5
 -3 -15 -10 20775 816.117 5
 3 -15 -10 21437.9 1058.33 4
 -3 -15 -11 855.904 286.185 4
 -3 -15 -11 801.91 174.082 5
 3 -15 -11 571.443 193.501 5
 3 -15 -11 399.42 214.889 4
 3 -15 -12 10093.3 712.136 5
 -3 -15 -12 8386.99 563.595 5
 -3 -15 -12 11130.5 842.214 4
 3 -15 -12 9110.89 777.253 4
 3 15 -13 669.078 256.226 5
 3 -15 -13 622.79 332.682 4
 3 -15 -13 652.33 227.918 5
 -3 -15 -13 544.016 287.357 4
 3 15 -14 8.76331 188.126 5
 -3 15 -14 336.449 252.063 5
 3 -15 -14 -92.4503 254.259 4
 -3 -15 -14 -14.0306 234.412 4
 -3 15 -15 604.961 270.937 5
 3 15 -15 156.357 187.53 5
 3 -15 -15 376.176 275.75 4
 -3 -15 -15 288.532 201.452 4
 -3 15 -16 2000.72 400.86 5
 -3 -15 -16 2406.67 430.313 4
 3 15 -16 2577.88 404.924 5
 -3 -15 -17 1803.66 350.063 4
 3 15 -17 2059.14 355.538 5
 -3 15 -17 2032.5 352.773 5
 -3 -15 -18 5934.23 512.799 4
 -3 15 -18 7507.29 561.623 5
 3 15 -18 7247.86 543.224 5
 -3 -17 0 3115.96 276.968 2
 3 17 0 3645.6 316.508 1
 3 17 1 16695.8 570.124 1
 -3 -17 1 16036.1 565.52 2
 3 17 -1 17623.9 767.798 1
 -3 -17 2 1106.8 150.754 2
 3 17 -2 1285.23 241.565 1
 3 17 2 1197.41 142.642 1
 3 -17 2 1170.09 162.497 1
 3 17 -3 6398.53 564.815 1
 3 -17 3 5744.55 393.662 1
 3 17 -4 142815 2851.7 1
 3 -17 4 133741 2097.55 1
 3 17 -5 39838.8 1670.77 1
 3 -17 5 35780.4 1221.56 1
 -3 -17 -5 36898.2 1033.64 4
 3 -17 -5 37647 1128.55 4
 3 -17 -5 35455.1 1145.98 3
 -3 -17 -6 15008.2 702.731 4
 3 -17 -6 15663.1 775.41 4
 -3 -17 -7 19341.5 847.393 4
 3 -17 -7 18576.5 873.869 4
 -3 -17 -8 53980.4 1500.04 4
 3 -17 -8 52140.7 1518.95 4
 3 -17 -9 20885.1 1022.24 4
 -3 -17 -9 21365.5 1025.87 4
 3 -17 -10 12291.6 851.005 4
 -3 -17 -10 12681.2 846.839 4
 -3 -17 -11 7377.98 709.321 4
 3 -17 -11 4805.78 584.052 4
 -3 -17 -12 4305.38 571.542 4
 3 -17 -12 5361.51 633.1 4
 -3 -17 -13 1912.4 367.277 4
 3 -17 -13 2282.28 459.194 4
 -3 -17 -14 2960.91 454.715 4
 3 17 -14 3365.44 509.238 5
 3 -17 -14 2245.79 451.258 4
 -3 17 -15 2888.24 453.921 5
 3 17 -15 2271.98 417.084 5
 -3 -17 -15 2234.32 417.235 4
 3 17 -16 4639.72 511.485 5
 -3 17 -16 4209.44 541.383 5
 -3 -17 -16 4469.33 534.702 4
 -3 -17 -17 7390.85 627.514 4
 3 17 -17 7963.52 625.387 5
 -3 17 -17 8589.45 685.187 5
 -3 17 -18 10859.6 660.8 5
 3 17 -18 10291.7 658.931 5
 -3 -19 0 5035.15 380.717 2
 3 19 0 5792.34 423.784 1
 3 19 -1 2571.29 330.326 1
 -3 -19 1 2066.18 235.777 2
 3 19 1 2352.74 238.033 1
 3 -19 2 15092.9 536.848 1
 3 19 2 16744.5 539.474 1
 3 19 -2 16727.9 873.885 1
 -3 -19 2 14927.5 602.397 2
 -3 -19 3 43504.4 1016.2 2
 3 -19 -3 45430.3 1297.81 3
 3 19 -3 46094 1566.04 1
 3 19 3 46191.6 793.361 1
 3 19 -4 1488.3 316.648 1
 3 -19 -4 1294.47 246.811 3
 3 -19 -4 1518.8 256.597 4
 3 -19 4 1381.04 223.464 1
 3 -19 -5 17777.8 851.743 3
 -3 -19 -5 18275.9 763.081 4
 3 -19 -5 18637.9 831.775 4
 -3 -19 -6 16590.5 774.369 4
 3 -19 -6 16160.9 809.843 4
 3 -19 -7 16717 851.053 4
 -3 -19 -7 17422.1 838.832 4
 -3 -19 -8 14027.9 795.228 4
 3 -19 -8 13796.6 836.772 4
 -3 -19 -9 30013.8 1221.55 4
 3 -19 -9 30101.5 1273.83 4
 3 -19 -10 7759.52 682.271 4
 -3 -19 -10 7428.79 664.366 4
 3 -19 -11 5418.39 647.06 4
 -3 -19 -11 5628.19 597.119 4
 3 -19 -12 2908.55 502.761 4
 -3 -19 -12 3470.03 504.966 4
 3 -19 -13 1937.74 460.226 4
 -3 -19 -13 1997.93 391.212 4
 -3 -19 -14 466.6 266.128 4
 3 -19 -14 165.454 265.555 4
 3 19 -14 15.4405 211.877 5
 3 19 -15 224.819 191.551 5
 -3 -19 -15 229.655 227.602 4
 -3 19 -15 106.204 204.133 5
 -3 -19 -16 1826.76 382.097 4
 3 19 -16 1515.96 314.607 5
 -3 19 -16 1391.85 366.047 5
 -3 19 -17 5194.62 530.407 5
 -3 -19 -17 5958.04 548.782 4
 3 19 -17 6276.45 545.029 5
 3 19 -18 3705.58 388.616 5
 -3 19 -18 3860.27 389.034 5
 3 -21 0 -0.5414 122.668 3
 3 21 0 211.392 125.962 1
 3 -21 -1 1110.16 220.777 3
 -3 -21 1 866.046 166.446 2
 3 21 -1 805.876 201.899 1
 3 -21 1 1063.91 209.061 3
 3 -21 -2 93.1734 104.653 3
 3 21 -2 38.2042 136 1
 -3 -21 2 125.687 94.1629 2
 3 -21 2 52.2396 84.8986 3
 -3 -21 2 43.0287 97.9973 3
 -3 -21 3 8970.34 501.212 2
 3 21 -3 9547.51 784.505 1
 -3 -21 3 10394.4 605.555 3
 -3 -21 -3 9070.25 519.748 3
 3 -21 3 9717.88 607.939 3
 3 -21 -3 9345.64 617.063 3
 3 21 -4 277.383 201.806 1
 3 -21 -4 182.201 120.132 4
 -3 -21 -4 100.632 93.1889 4
 -3 -21 -4 210.667 116.659 3
 3 -21 -4 200.471 112.074 3
 3 -21 -5 5744.42 521.694 3
 3 -21 -5 5490.17 476.339 4
 -3 -21 -5 5831.93 448.168 4
 -3 -21 -6 -32.1233 119.749 4
 3 -21 -6 -122.881 157.659 4
 3 -21 -7 467.894 231.283 4
 -3 -21 -7 561.357 205.891 4
 3 -21 -8 15.8606 172.361 4
 -3 -21 -8 63.7421 165.336 4
 3 -21 -9 3662.73 494.732 4
 -3 -21 -9 3157.95 427.801 4
 -3 -21 -10 776.25 288.339 4
 3 -21 -10 808.732 334.631 4
 -3 -21 -11 223.059 225.46 4
 3 -21 -11 474.123 374.652 4
 3 -21 -12 -21.2708 267.33 4
 -3 -21 -12 -49.12 225.49 4
 3 -21 -13 569.996 298.325 4
 -3 -21 -13 625.92 257.785 4
 3 21 -14 513.756 223.573 5
 -3 -21 -14 528.132 280.311 4
 -3 21 -15 286.571 186.353 5
 3 21 -15 -30.6636 146.881 5
 -3 -21 -15 -236.098 250.583 4
 -3 21 -16 341.796 200.777 5
 3 21 -16 211.296 146.012 5
 -3 -21 -16 -1.9691 178.41 4
 -3 21 -17 770.689 223.49 5
 3 21 -17 866.758 205.11 5
 3 -23 0 438.546 211.348 3
 -3 -23 0 202.419 117.263 3
 3 -23 -1 417.235 162.883 3
 -3 -23 1 451.959 140.315 3
 -3 -23 -1 320.706 142.447 3
 3 -23 1 386.248 149.233 3
 3 -23 2 134.942 110.432 3
 -3 -23 -2 201.934 120.622 3
 3 -23 -2 149.064 126.719 3
 -3 -23 2 384.198 147.634 3
 -3 -23 -3 29172.4 945.134 4
 -3 -23 3 28358.5 1022.09 3
 3 -23 3 26271.7 999.474 3
 3 -23 -3 28713.5 1134.14 3
 -3 -23 -3 27318.3 972.963 3
 3 -23 4 243.112 137.288 3
 -3 -23 -4 144.125 125.653 3
 3 -23 -4 384.943 178.972 3
 -3 -23 -4 132.008 135.309 4
 -3 -23 -5 30488.8 1064.47 4
 3 -23 -5 29779.6 1138.59 4
 3 -23 -5 29908.6 1248.5 3
 -3 -23 -6 1399.1 323.059 4
 3 -23 -6 1280.45 317.8 4
 3 -23 -7 25616.5 1154.05 4
 -3 -23 -7 28185.7 1131.02 4
 3 -23 -8 473.675 249.344 4
 -3 -23 -8 237.953 179.684 4
 3 -23 -9 9201.3 781.225 4
 -3 -23 -9 10135.5 756.804 4
 3 -23 -10 633.774 341.516 4
 -3 -23 -10 661.942 314.608 4
 3 -23 -11 467.646 291.53 4
 -3 -23 -11 493.127 231.058 4
 3 -23 -12 2644.71 527.831 4
 -3 -23 -12 2732.53 478.693 4
 -3 -23 -13 15861.1 1021.07 4
 -3 -23 -14 751.038 294.132 4
 3 23 -14 244.447 190.903 5
 3 23 -15 7734.26 679.707 5
 -3 23 -15 8674.71 750.252 5
 -3 -23 -15 8324.5 716.7 4
 3 23 -16 975.612 254.407 5
 -3 23 -16 1172.23 263.29 5
 -3 -23 -16 954.026 306.251 4
 3 23 -17 533.253 150.091 5
 -3 23 -17 423.327 161.365 5
 3 -25 0 713.961 186.571 3
 -3 -25 0 648.951 155.755 3
 3 -25 -1 26011.1 1071.99 3
 -3 -25 1 23767.2 934.437 3
 3 -25 1 22998.1 959.762 3
 -3 -25 -1 23362.4 956.922 3
 -3 -25 2 983.202 219.961 3
 3 -25 -2 1059.64 250.694 3
 3 -25 2 941.488 210.372 3
 -3 -25 -2 1007.11 223.448 3
 -3 -25 3 75449.8 1696.29 3
 -3 -25 -3 70783.7 1659.14 3
 3 -25 3 71527 1680.41 3
 -3 -25 -3 73610.3 1583.79 4
 -3 -25 4 3374.94 425.422 3
 3 -25 4 3448.89 415.893 3
 -3 -25 -4 2846.44 371.456 3
 3 -25 -4 3346.64 494.585 3
 -3 -25 -4 3090.35 364.014 4
 -3 -25 5 43570.8 1403.54 3
 3 -25 5 41681.7 1377.62 3
 -3 -25 -5 44352.8 1326.66 4
 3 -25 -6 3512.87 469.718 4
 -3 -25 -6 3266.73 409.509 4
 3 -25 -7 32845.8 1329.11 4
 -3 -25 -7 35442.2 1288.65 4
 -3 -25 -8 2097.84 386.315 4
 3 -25 -8 1935.78 415.578 4
 3 -25 -9 1881.71 420.489 4
 -3 -25 -9 2168.43 404.907 4
 3 -25 -10 1360.38 386.489 4
 -3 -25 -10 1125.85 319.959 4
 -3 -25 -11 33228.2 1431 4
 -3 -25 -12 1119.41 324.494 4
 -3 -25 -13 15206.8 992.893 4
 -3 -25 -14 6548.88 698.171 4
 3 25 -14 6160.77 650.946 5
 3 25 -15 15956.7 889.03 5
 -3 25 -15 18852.1 1025.58 5
 -3 -25 -15 16451.6 963.421 4
 3 -25 16 1405.52 293.142 3
 -3 25 -16 1814.56 324.354 5
 3 25 -16 1186.8 269.785 5
 3 25 -17 2288.03 282.499 5
 3 -27 0 3837.79 449.216 3
 -3 -27 0 4064.12 419.099 3
 3 -27 -1 8612.23 657.297 3
 -3 -27 -1 7939.47 583.618 3
 -3 -27 1 8037.58 573.13 3
 3 -27 1 7971.03 601.379 3
 3 -27 2 7419.33 567.837 3
 3 -27 -2 7714.69 640.569 3
 -3 -27 -2 6940.43 564.159 3
 -3 -27 2 8042.23 578.771 3
 -3 -27 -3 48767.8 1440.98 3
 -3 -27 3 49888.3 1438.33 3
 3 -27 3 47644.5 1429.63 3
 3 -27 4 12847 771.269 3
 -3 -27 4 13395.2 772.634 3
 3 -27 -4 13697.8 914.426 3
 -3 -27 -4 12595.3 759.601 3
 -3 -27 -4 13440.3 767.641 4
 3 -27 -5 30254.8 1386.13 3
 3 -27 5 26258.6 1121.71 3
 -3 -27 5 27574.2 1142.6 3
 -3 -27 6 5717.69 554.269 3
 -3 -27 -6 5856.13 544.535 4
 3 -27 6 5508.17 533.377 3
 -3 -27 -7 36400.5 1337.62 4
 3 -27 7 33063.8 1338.89 3
 -3 -27 -8 2600.22 374.993 4
 -3 -27 -9 67.4174 211.814 4
 -3 -27 -10 1943.86 398.93 4
 -3 -27 -11 18407 1078.98 4
 -3 -27 -12 3040.25 500.092 4
 -3 -27 -13 12864 912.838 4
 3 -27 14 10857.3 799.756 3
 -3 -27 -14 9601.4 766.217 4
 3 27 -14 9843.89 738.495 5
 3 27 -15 16742.4 861.681 5
 -3 27 -15 16556.1 902.548 5
 3 -27 15 15323.1 862.222 3
 -3 -27 16 1269.87 234.798 3
 -3 27 -16 1441.45 268.186 5
 3 -27 16 1547.23 270.669 3
 3 27 -16 1165.87 235.073 5
 -3 -29 0 541.566 166.76 3
 3 -29 0 528.966 215.112 3
 3 -29 1 2472.05 364.08 3
 -3 -29 -1 2503.14 341.357 3
 3 -29 -1 2977.95 419.475 3
 -3 -29 1 2754.53 358.644 3
 -3 -29 -2 3982.43 435.759 3
 -3 -29 2 4575.27 443.853 3
 3 -29 -2 4130.32 487.304 3
 3 -29 2 3889.97 435.029 3
 -3 -29 -3 8948.64 651.702 3
 3 -29 -3 9134.1 740.089 3
 -3 -29 3 9033.15 646.918 3
 3 -29 3 8856.39 650.781 3
 -3 -29 4 2424.76 336.647 3
 -3 -29 -4 2653.74 376.849 3
 3 -29 4 2051.25 333.667 3
 3 -29 -4 3053.72 457.689 3
 -3 -29 5 2578.58 381.253 3
 3 -29 5 1897.14 319.105 3
 3 -29 -5 2861.48 465.749 3
 -3 -29 -5 1951.93 319.64 4
 -3 -29 6 10005.5 717.243 3
 -3 -29 -6 10108.6 716.891 4
 -3 -29 7 3050.53 402.827 3
 3 -29 7 4150.51 512.153 3
 -3 -29 -7 4433.66 504.72 4
 -3 -29 -8 2741.64 437.481 4
 -3 -29 8 2785.49 421.314 3
 3 -29 8 2055.36 380.058 3
 -3 -29 -9 458.553 243.368 4
 3 -29 9 668.054 294.253 3
 -3 -29 9 669.922 261.455 3
 -3 -29 -10 71.403 204.312 4
 -3 -29 10 -9.55488 168.381 3
 3 -29 10 336.108 214.529 3
 3 -29 11 627.865 203.091 3
 -3 -29 -11 900.939 297.158 4
 -3 -29 12 5172.77 569.634 3
 3 -29 12 5557.93 583.783 3
 -3 -29 -12 5380.64 622.446 4
 -3 -29 13 9993.52 741.132 3
 -3 -29 -13 9984.58 766.054 4
 3 -29 13 10255.6 755.507 3
 3 -29 14 2956.94 411.151 3
 -3 -29 14 2813.59 392.054 3
 3 29 -14 2852.77 397.049 5
 -3 -29 15 613.05 183.47 3
 3 29 -15 571.64 192.432 5
 -3 29 -15 732.807 210.481 5
 3 -29 15 719.689 212.83 3
 3 -31 0 19384.5 1042.77 3
 -3 -31 0 19953.6 988.947 3
 3 -31 1 5192.84 538.139 3
 -3 -31 1 5525.62 510.024 3
 -3 -31 -1 6120.76 547.759 3
 3 -31 -1 5876.03 590.949 3
 3 -31 2 840.788 206.396 3
 -3 -31 -2 1019.42 235.535 3
 3 -31 -2 1035.03 290.284 3
 -3 -31 2 1216.93 267.768 3
 -3 -31 -3 6544.13 578.178 3
 -3 -31 3 6608.18 580.235 3
 3 -31 -3 6463.02 645.558 3
 3 -31 3 5656.59 543.352 3
 3 -31 4 130.496 128.597 3
 -3 -31 -4 129.966 143.013 3
 3 -31 -4 52.8742 183.518 3
 -3 -31 4 248.568 156.529 3
 3 -31 5 7175.5 612.742 3
 3 -31 -5 7511.51 753.253 3
 -3 -31 -5 5253.73 509.328 4
 -3 -31 5 6062.11 549.342 3
 -3 -31 6 4767.55 511.025 3
 3 -31 6 4006.16 476.001 3
 -3 -31 -6 3674.11 469.515 4
 3 -31 7 10948.2 767.075 3
 -3 -31 7 10437.9 751.973 3
 -3 -31 -8 9656.53 745.713 4
 -3 -31 8 8782.61 701.536 3
 3 -31 8 9073.24 720.886 3
 3 -31 9 5667.65 617.156 3
 -3 -31 -9 6845.89 655.769 4
 -3 -31 9 6014.4 587.448 3
 3 -31 10 6401.61 613.044 3
 -3 -31 10 6106.76 602.636 3
 -3 -31 -10 6451.32 630.125 4
 -3 -31 -11 877.463 287.571 4
 3 -31 11 1447.23 322.535 3
 -3 -31 11 1348.02 292.04 3
 3 -31 12 133.319 137.178 3
 -3 -31 12 390.338 200.119 3
 -3 -31 -12 148.947 232.235 4
 -3 -31 13 51.8532 123.275 3
 3 -31 13 -128.421 151.052 3
 -3 -31 14 296.221 157.756 3
 3 31 -14 151.816 122.623 5
 3 -31 14 158.845 147.835 3
 3 -31 15 142.289 105.834 3
 -3 -31 15 307.919 138.222 3
 3 31 -15 219.638 135.946 5
 -3 31 -15 254.375 117.404 5
 -3 -33 0 55359.5 1693.91 3
 3 -33 0 68088.5 1987.63 3
 3 -33 1 3331.2 476.735 3
 -3 -33 -1 3557.41 465.506 3
 3 -33 -1 4120.8 539.604 3
 -3 -33 1 2789.74 377.377 3
 3 -33 2 70908.2 1959.07 3
 3 -33 -2 74875.3 2165.38 3
 -3 -33 -2 74070.5 1981.82 3
 -3 -33 3 1005.49 275.886 3
 -3 -33 -3 1367.79 310.897 3
 3 -33 -3 1298.41 340.684 3
 3 -33 3 1461.44 336.046 3
 3 -33 -4 2705.31 460.168 3
 3 -33 4 2630.34 388.586 3
 -3 -33 4 2627.31 378.243 3
 -3 -33 -4 2810.78 407.847 3
 -3 -33 5 6646.12 577.343 3
 3 -33 5 6609.66 601.953 3
 -3 -33 6 9209.47 685.862 3
 3 -33 6 9199.1 704.711 3
 3 -33 7 1066.43 276.125 3
 -3 -33 7 1066.64 282.509 3
 -3 -33 8 28651.7 1194.46 3
 3 -33 8 29823.6 1257 3
 3 -33 9 5585.22 601.18 3
 -3 -33 9 5979.15 581.647 3
 -3 -33 10 24301.6 1111.34 3
 3 -33 10 24712.2 1136.5 3
 -3 -33 11 2997.2 403.718 3
 3 -33 11 3096.01 416.097 3
 3 -33 12 8629.54 643.776 3
 -3 -33 12 8090.31 597.3 3
 3 -33 13 1516.63 294.807 3
 3 33 -13 1692.25 292.708 5
 -3 -33 13 1302.93 260.534 3
 3 -33 14 1883.87 299.288 3
 -3 -33 14 1260.43 217.884 3
 3 33 -14 1499.66 261.739 5
 -3 -35 0 93004.6 2248.57 3
 3 -35 0 88781.7 2314.05 3
 3 -35 -1 1740.89 419.393 3
 3 -35 1 2013.48 460.06 3
 -3 -35 1 2147.23 404.214 3
 -3 -35 -1 1991.1 387.888 3
 -3 -35 -2 24059 1161.75 3
 -3 -35 2 24838.5 1156.5 3
 3 -35 2 24209.3 1197.31 3
 3 -35 -2 24318.8 1267.57 3
 3 -35 -3 88.7219 182.089 3
 3 -35 3 13.8727 136.536 3
 -3 -35 -3 -87.4081 173.61 3
 -3 -35 3 251.862 158.44 3
 -3 -35 4 15703.3 890.584 3
 3 -35 4 15505 908.307 3
 3 -35 -4 16222.9 1094.06 3
 -3 -35 5 1268.24 285.925 3
 3 -35 5 1006.92 269.06 3
 -3 -35 6 2060.06 322.397 3
 3 -35 6 1886.57 337.099 3
 3 -35 7 468.925 231.389 3
 -3 -35 7 416.193 201.019 3
 -3 -35 8 24342 1089.94 3
 3 -35 8 23493 1105.09 3
 -3 -35 9 3787.82 460.418 3
 3 -35 9 3311.99 472.903 3
 3 -35 10 30835.3 1228.46 3
 -3 -35 10 29979.1 1160.74 3
 -3 -35 11 2115.55 352.247 3
 3 -35 11 2435.82 384.507 3
 -3 -35 12 10627.8 646.681 3
 3 -35 12 12254.1 713.904 3
 3 -35 13 1208.72 240.605 3
 -3 -35 13 863.726 200.592 3
 3 35 -13 981.073 226.734 5
 3 -37 0 93888.9 2422.06 3
 -3 -37 0 102174 2361.74 3
 3 -37 -1 1977.99 385.176 3
 -3 -37 1 2337.28 368.648 3
 -3 -37 -1 2784.73 411.192 3
 3 -37 1 2060.78 361.811 3
 3 -37 2 797.528 278.18 3
 -3 -37 -2 385.347 189.047 3
 3 -37 -2 386.229 218.228 3
 -3 -37 2 545.811 191.852 3
 3 -37 3 220.697 158.832 3
 3 -37 -3 610.384 275.612 3
 -3 -37 -3 345.633 157.331 3
 -3 -37 3 445.285 194.099 3
 -3 -37 4 2141.91 360.764 3
 3 -37 -4 2173.17 415.669 3
 3 -37 4 2292.77 383.791 3
 -3 -37 5 729.441 211.054 3
 3 -37 5 272.151 163.637 3
 -3 -37 6 20.3435 105.44 3
 3 -37 6 42.0964 134.218 3
 -3 -37 7 371.944 168.505 3
 3 -37 7 85.4894 141.715 3
 3 -37 8 13468 822.255 3
 -3 -37 8 13491.7 780.753 3
 3 -37 9 2001.34 340.27 3
 -3 -37 9 2112.61 342.306 3
 3 -37 10 10805.2 699.542 3
 -3 -37 10 10427.7 659.855 3
 -3 -37 11 846.172 223.997 3
 3 -37 11 1123.88 237.237 3
 3 -37 12 3884.71 380.756 3
 -3 -37 12 3555.64 342.652 3
 3 -37 13 206.724 113.193 3
 -3 -39 0 3113.28 422.573 3
 3 -39 0 2707.84 418.056 3
 3 -39 1 31.3431 185.531 3
 -3 -39 -1 214.007 143.477 3
 3 -39 -1 240.374 202.604 3
 -3 -39 1 291.317 178.492 3
 3 -39 -2 968.102 283.044 3
 -3 -39 -2 1043.21 272.51 3
 -3 -39 2 1059.05 247.073 3
 3 -39 2 876.934 215.735 3
 3 -39 3 995.754 284.976 3
 3 -39 -3 855.004 284.4 3
 -3 -39 3 1269.65 267.795 3
 -3 -39 4 3297.2 414.509 3
 3 -39 4 3057.59 436.689 3
 -3 -39 5 2494.67 366.276 3
 3 -39 5 2395.92 379.178 3
 3 -39 6 7678.21 624.974 3
 -3 -39 6 7902.22 613.407 3
 -3 -39 7 261.216 167.583 3
 3 -39 7 42.2233 111.031 3
 -3 -39 8 1313.23 257.303 3
 3 -39 8 1072.5 242.492 3
 3 -39 9 550.947 184.377 3
 -3 -39 9 557.039 158.944 3
 -3 -39 10 614.681 175.901 3
 3 -39 10 580.148 179.349 3
 -3 -39 11 148.378 96.0583 3
 3 -39 11 -65.1581 116.809 3
 3 -39 12 1110.65 202.507 3
 -3 -41 0 11553.4 782.875 3
 3 -41 0 11589.3 832.26 3
 3 -41 -1 2958.82 441.647 3
 -3 -41 1 2778.77 382.694 3
 3 -41 1 2762.26 414.492 3
 -3 -41 -1 2678.52 367.412 3
 3 -41 -2 4620.69 555.621 3
 -3 -41 -2 5029.53 522.398 3
 3 -41 2 4774.34 530.142 3
 -3 -41 2 4973.18 505.571 3
 -3 -41 3 8773.2 657.691 3
 3 -41 3 8863.95 693.152 3
 3 -41 4 12715.8 822.232 3
 -3 -41 4 13586.9 796.767 3
 -3 -41 5 7892.95 603.557 3
 3 -41 5 7956.32 664.187 3
 -3 -41 6 2854.37 360.312 3
 3 -41 6 3023.26 396.297 3
 -3 -41 7 4136.66 409.989 3
 3 -41 7 4294.36 451.41 3
 3 -41 8 3614.94 410.823 3
 -3 -41 8 3633.99 380.918 3
 -3 -41 9 214.366 118.376 3
 3 -41 9 146.246 121.969 3
 -3 -41 10 1090.07 187.543 3
 3 -41 10 1460.99 246.909 3
 -3 -43 0 1302.94 266.684 3
 3 -43 0 1794.41 320.72 3
 -3 -43 -1 7725.61 615.611 3
 3 -43 1 7693.76 638.742 3
 -3 -43 1 8125.84 612.175 3
 3 -43 -1 7866.87 677.44 3
 3 -43 -2 4558.6 524.823 3
 -3 -43 2 4530.62 454.255 3
 3 -43 2 4487.47 490.099 3
 -3 -43 3 10978.5 684.001 3
 3 -43 3 11158.6 748.542 3
 3 -43 4 9267.91 678.097 3
 -3 -43 4 9136.01 619.625 3
 3 -43 5 16957.6 881.955 3
 -3 -43 5 16624.4 808.772 3
 -3 -43 6 7166.83 529.285 3
 3 -43 6 7774.15 586.949 3
 -3 -43 7 8139.38 533.799 3
 3 -43 7 9075.43 614.905 3
 -3 -43 8 3392.55 338.912 3
 3 -43 8 3875.34 392.279 3
 3 -43 9 2822.38 314.624 3
 3 -45 0 168.527 137.339 3
 3 -45 1 260.181 157.797 3
 -3 -45 1 456.411 164.055 3
 3 -45 -1 372.115 139.614 3
 3 -45 2 517.07 179.939 3
 -3 -45 2 541.449 193.825 3
 3 -45 3 9087.71 628.795 3
 -3 -45 3 8962.49 574.514 3
 -3 -45 4 1032.31 206.777 3
 3 -45 4 1306.71 247.686 3
 3 -45 5 15541.1 783.88 3
 -3 -45 5 14587.8 697.972 3
 -3 -45 6 2048.65 267.725 3
 3 -45 6 2206.37 307.098 3
 3 -45 7 8290.85 533.703 3
 3 -47 1 3566.61 391.482 3
 3 -47 2 -35.455 105.796 3
 3 -47 3 214.705 130.866 3
 3 -47 4 35.394 81.8236 3
 3 -47 5 1611.61 246.297 3
 4 0 0 12711.6 407.395 2
 -4 0 1 220.258 61.9012 2
 4 0 -1 209.157 55.5828 2
 -4 0 2 660222 2363.65 2
 4 0 -2 651448 2530.13 1
 4 0 -3 3032.48 263.878 1
 4 0 -4 1973.19 214.813 1
 -4 0 4 1842.27 170.139 1
 -4 0 5 228.679 92.773 1
 4 0 -5 220.801 122.707 1
 -4 0 6 983.825 156.71 1
 4 0 -6 941.32 208.147 1
 4 0 6 972.429 223.731 1
 4 0 7 1389.08 306.207 1
 -4 0 7 1438.4 242.123 1
 4 0 -7 1036.11 311.304 1
 4 0 -8 7249.98 442.89 5
 -4 0 8 7518.4 493.815 1
 -4 0 -9 1708.38 272.165 4
 4 0 -9 1474.37 273.753 5
 -4 0 -9 1812.17 273.503 5
 -4 0 -10 26269.3 997.768 4
 -4 0 -10 26503.3 932.494 5
 4 0 -10 27394.6 975.377 5
 4 0 -11 1207.79 255.701 5
 -4 0 -11 1270.54 279.965 5
 -4 0 -11 1497.34 311.808 4
 -4 0 -12 28767.6 1145.02 4
 4 0 -12 30187.2 1138.94 5
 -4 0 -12 28607.1 1099.95 5
 -4 0 -13 3298.41 465.466 5
 4 0 -13 3580.79 454.984 5
 -4 0 -13 3100.97 420.328 4
 4 0 -14 16094.8 900.559 5
 -4 0 -14 14825.1 853.653 4
 -4 0 -14 16556.1 900.078 5
 -4 0 -15 4729.67 529.016 5
 4 0 -15 3886.25 538.728 5
 -4 0 -16 11004 724.796 5
 4 0 -16 11445 770.364 5
 -4 0 -17 2972.64 398.412 5
 4 0 -17 3513.23 437.993 5
 4 0 -18 810.191 214.758 5
 -4 0 -18 714.22 205.951 5
 4 0 -19 1028.48 208.386 5
 4 2 0 24620.9 541.841 2
 -4 2 1 7542.96 290.257 2
 4 -2 -1 8154.63 258.653 2
 4 -2 -2 849.046 104.259 1
 4 2 -2 1036.25 132.287 1
 -4 2 2 740.424 93.0772 2
 4 2 -3 30904.4 742.75 1
 4 -2 -3 33163.2 685.147 1
 -4 -2 4 187899 1681.26 1
 4 -2 -4 187172 2003.65 1
 4 -2 -5 663.056 162.917 1
 -4 -2 5 942.271 154.385 1
 -4 2 5 1024.93 148.509 1
 4 2 -5 721.692 171.294 1
 -4 2 6 32107.5 823.982 1
 -4 -2 6 31197.6 859.293 1
 4 2 -6 30074.7 1112.42 1
 4 -2 6 29564.9 1163.47 1
 4 -2 -6 31355.2 1114.57 1
 4 2 7 3053.29 410.307 1
 4 -2 7 3168.05 415.787 1
 -4 2 7 2987.08 285.311 1
 -4 -2 7 2921.68 306.308 1
 4 2 -7 2872.59 388.972 1
 4 -2 -7 3185.86 416.461 1
 4 2 -8 10540.1 560.11 5
 4 2 -8 12287.9 908.564 1
 4 -2 -8 13139 612.017 5
 -4 2 8 11191.9 588.746 1
 4 2 -9 252.244 115.224 5
 -4 -2 -9 331.52 132.351 5
 -4 -2 -9 234.148 143.704 4
 4 -2 -9 372.084 150.707 5
 -4 2 -9 389.3 153.571 4
 -4 2 -10 16372 776.701 4
 -4 -2 -10 15737.9 809.951 4
 -4 -2 -10 16085.4 721.147 5
 4 2 -10 15716.5 774.48 5
 4 -2 -10 16747.7 761.947 5
 4 -2 -10 17546.3 814.264 4
 -4 2 -10 15769.2 752.854 5
 -4 -2 -11 2464.98 361.326 4
 -4 -2 -11 2600.51 350.957 5
 4 2 -11 2645.33 370.104 5
 -4 2 -11 2787.65 378.343 5
 4 -2 -11 3001.67 388.016 4
 4 -2 -11 2252.26 341.965 5
 -4 2 -11 2867.77 368.371 4
 -4 -2 -12 9309.75 624.291 5
 4 -2 -12 9216.14 641.622 5
 -4 2 -12 8917.26 647.166 4
 4 2 -12 8521.02 637.083 5
 -4 2 -12 9135.11 642.161 5
 -4 -2 -12 8759.13 652.434 4
 -4 2 -13 2618.44 400.2 5
 4 -2 -13 2379.04 395.959 5
 4 2 -13 2246.11 375.779 5
 -4 -2 -13 1942.92 355.097 4
 -4 -2 -13 1334.83 263.598 5
 -4 2 -13 1918.06 314.926 4
 4 -2 -14 11356.8 731.757 5
 4 2 -14 12062.3 814.362 5
 -4 2 -14 11998 799.781 5
 -4 -2 -14 10816.4 754.005 4
 -4 -2 -15 3221.9 432.524 4
 4 -2 -15 3380.86 448.144 5
 -4 2 -15 2767.87 456.44 5
 -4 -2 -15 2799.14 419.575 5
 4 2 -15 3199.4 460.275 5
 4 -2 -16 14996.5 875.773 5
 4 2 -16 15988.8 916.308 5
 -4 -2 -16 16348.9 877.209 5
 -4 2 -16 15669.4 895.22 5
 4 2 -17 4.46786 153.436 5
 -4 2 -17 282.042 147.133 5
 4 -2 -17 186.51 171.59 5
 -4 -2 -17 69.0873 127.397 5
 -4 -2 -18 4600.78 417.111 5
 4 -2 -18 4812.11 452.363 5
 -4 2 -18 4716.65 446.205 5
 4 2 -18 5202.12 494.963 5
 -4 2 -19 386.923 143.698 5
 4 2 -19 515.993 177.892 5
 4 -2 -19 -46.0566 114.395 5
 4 4 0 244907 1620.14 2
 4 4 1 2589.93 220.437 2
 4 -4 -1 2246.58 140.108 2
 -4 4 2 57052.3 670.315 2
 4 4 -2 54839.8 845.385 1
 4 -4 -2 56935.9 659.72 1
 4 4 -3 17302.2 578.139 1
 4 -4 -3 17913 477.665 1
 4 4 -4 90357.6 1534.39 1
 4 -4 -4 98296.6 1395.43 1
 4 -4 5 16269.8 812.775 1
 4 4 -5 15827.4 722.303 1
 4 -4 -5 17740.3 703.871 1
 -4 -4 5 17495.4 600.601 1
 -4 4 5 17343.4 515.921 1
 4 -4 6 2537.61 354.3 1
 -4 -4 6 2825.96 272.048 1
 4 -4 -6 2702.96 328.193 1
 4 4 -6 2538.66 338.547 1
 -4 4 6 2436.04 233.534 1
 4 4 7 5246.88 541.764 1
 -4 4 7 4767.01 348.76 1
 -4 -4 7 4745.5 374.966 1
 4 -4 7 5121.65 525.913 1
 4 4 -7 4747.79 517.855 1
 -4 -4 -8 4683.62 420.437 4
 4 4 -8 3905.47 527.505 1
 4 -4 -8 4932.48 365.333 5
 -4 4 8 4422.14 361.234 1
 4 -4 -9 3126.15 324.467 5
 -4 -4 -9 2721.39 341.426 4
 -4 -4 -9 2813.29 287.319 5
 4 4 -9 2863.77 312.754 5
 4 -4 -9 2715.71 321.315 4
 -4 -4 -10 197.439 136.535 5
 4 -4 -10 199.614 134.677 5
 -4 -4 -10 290.583 150.568 4
 4 4 -10 -64.2069 124.081 5
 -4 4 -10 77.9806 89.2187 4
 4 -4 -10 394.599 173.727 4
 -4 -4 -11 919.071 250.715 4
 4 -4 -11 655.81 178.046 5
 4 4 -11 664.917 200.823 5
 4 -4 -11 1126.31 295.668 4
 -4 4 -11 838.373 188.694 4
 -4 -4 -11 708.506 185.279 5
 -4 -4 -12 93.9657 108.018 5
 4 4 -12 -52.1409 139.05 5
 4 -4 -12 21.1785 110.559 5
 -4 -4 -12 173.721 172.923 4
 -4 4 -12 5.42543 119.939 5
 -4 4 -12 17.8469 123.713 4
 4 -4 -12 110.691 184.189 4
 4 -4 -13 69.2469 136.324 5
 4 -4 -13 -116.858 211.905 4
 4 4 -13 81.8042 134.953 5
 -4 -4 -13 32.68 96.9674 5
 -4 4 -13 264.371 173.478 5
 -4 -4 -14 199.784 193.061 4
 4 -4 -14 -21.7042 130.507 5
 -4 -4 -14 -4.37064 111.536 5
 4 4 -14 -394.159 267.147 5
 -4 4 -14 -132.991 149.409 5
 4 -4 -15 1710.46 317.536 5
 -4 4 -15 1841.35 356.834 5
 -4 -4 -15 1616.62 295.132 5
 4 4 -15 2024.85 372.02 5
 -4 -4 -15 2280.87 380.832 4
 -4 -4 -16 273.491 194.262 4
 4 4 -16 86.3793 133.117 5
 -4 4 -16 42.0607 159.055 5
 4 -4 -16 -11.2882 141.081 5
 -4 -4 -16 256.52 154.117 5
 4 4 -17 1833.46 348.094 5
 -4 4 -17 1815.93 337.312 5
 4 -4 -17 1532.93 300.13 5
 -4 -4 -17 1710.46 261.323 5
 4 4 -18 0.17941 146.533 5
 -4 -4 -18 116.47 109.956 5
 -4 4 -18 -172.039 125.902 5
 4 -4 -18 121.083 159.153 5
 4 -4 -19 201.829 138.899 5
 4 4 -19 -15.4522 114.693 5
 -4 4 -19 187.057 115.133 5
 4 6 0 110027 1099.53 2
 -4 -6 0 112787 1287.24 2
 4 -6 -1 348.841 68.2267 2
 4 6 1 676.538 129.954 2
 -4 6 2 46413.1 630.939 2
 4 -6 -2 49492.6 572.101 1
 4 6 -2 47744.9 858.459 1
 -4 6 3 28148.3 464.512 2
 4 -6 -3 28152.4 607.198 1
 4 -6 -4 55827.2 1010.64 1
 4 6 -4 51533.9 1211.59 1
 4 -6 4 53083.1 1388.54 1
 4 6 -5 1911.4 277.566 1
 -4 -6 5 2360.47 235.902 1
 4 -6 5 2002.21 286.93 1
 4 -6 -5 2429.41 267.87 1
 -4 -6 6 36.8527 84.303 1
 4 6 -6 106.743 105.081 1
 4 -6 6 71.4289 133.611 1
 -4 6 6 79.3423 53.538 1
 4 6 7 290.275 191.265 1
 -4 6 7 227.601 91.7031 1
 4 6 -7 304.142 198.693 1
 -4 -6 -8 5256.81 442.81 4
 -4 6 8 4556.43 353.769 1
 4 -6 -8 5145.77 372.683 5
 -4 -6 -9 14386.8 755.155 4
 4 -6 -9 12992.6 730.402 4
 -4 -6 -9 14605.7 621.601 5
 4 -6 -9 14166 661.75 5
 -4 -6 -10 21033.7 937.225 4
 4 -6 -10 19644.6 900.838 4
 -4 -6 -10 19089.2 787.258 5
 4 -6 -10 19964.1 825.06 5
 -4 6 -10 18829 796.293 4
 4 6 -10 18053 850.867 5
 4 -6 -11 15613.1 750.551 5
 4 6 -11 15951 874.896 5
 4 -6 -11 18060.8 904.628 4
 -4 -6 -11 16855.3 897.733 4
 -4 -6 -11 16873.9 755.228 5
 4 -6 -12 9090.62 693.781 4
 4 -6 -12 8386.85 612.193 5
 -4 -6 -12 7169.23 520.372 5
 4 6 -12 8043.07 653.859 5
 -4 6 -12 8850.33 664.249 5
 -4 -6 -12 8617.12 681.554 4
 4 -6 -13 3029.66 394.438 5
 4 6 -13 3227.89 443.28 5
 -4 -6 -13 2256.59 310.671 5
 -4 6 -13 3562.08 450.346 5
 4 -6 -13 2922.74 429.796 4
 -4 -6 -13 2444 384.958 4
 -4 -6 -14 1683.05 349.819 4
 4 6 -14 1681.61 327.635 5
 4 -6 -14 2105.06 392.461 4
 -4 6 -14 1938.91 374.505 5
 4 -6 -14 1870.73 352.645 5
 -4 -6 -14 1208.16 238.821 5
 -4 6 -15 2072.97 377.231 5
 4 -6 -15 2297.28 357.88 5
 4 6 -15 1722.9 349.686 5
 -4 -6 -15 1102.88 214.206 5
 -4 -6 -15 1952.2 371.168 4
 -4 6 -16 332.592 208.492 5
 -4 -6 -16 159.516 125.212 5
 4 -6 -16 130.326 164.01 5
 4 6 -16 22.071 133.484 5
 -4 -6 -16 -209.418 179.227 4
 -4 -6 -17 239.635 108.319 5
 -4 -6 -17 524.858 215.084 4
 4 6 -17 125.338 184.67 5
 4 -6 -17 300.451 173.178 5
 -4 6 -17 335.03 141.104 5
 -4 6 -18 4138 432.148 5
 4 -6 -18 4442.38 441.74 5
 4 6 -18 3940.76 425.141 5
 -4 6 -19 2358.7 283.777 5
 4 6 -19 3660.5 379.616 5
 -4 -8 0 76076.3 1114.77 2
 4 8 -1 117781 1221.67 1
 4 -8 -1 114889 841.735 2
 4 8 -2 3613.3 295.098 1
 4 -8 -2 3629.9 159.214 1
 4 8 2 3114.61 276.408 2
 -4 -8 2 3716.85 238.72 2
 -4 8 3 90823.4 818.656 2
 4 -8 3 90394.9 1689.27 1
 4 8 -3 87641.5 1449.71 1
 4 8 -4 12536.8 635.187 1
 4 -8 4 11836.8 653.873 1
 4 -8 -4 13507.9 473.605 1
 -4 8 4 13531.6 331.345 2
 4 8 -5 18381.2 843.209 1
 -4 -8 5 19921.6 688.533 1
 4 -8 5 19424.2 902.885 1
 -4 -8 6 4857.08 363.929 1
 4 8 -6 5019.21 491.811 1
 4 -8 6 5188.19 509.891 1
 4 8 7 12396.7 853.236 1
 4 8 -7 11704.9 856.695 1
 -4 -8 -8 5685.35 462.162 4
 4 -8 -8 5304.17 452.543 4
 4 8 8 5363.93 606.128 1
 4 -8 -8 5535.04 401.598 5
 -4 -8 -9 14947.7 764.507 4
 -4 -8 -9 14186 604.414 5
 4 -8 -9 14585.2 659.752 5
 4 -8 -9 14715.8 757.966 4
 4 -8 -10 38728.5 1142.41 5
 -4 -8 -10 35818.6 1291.93 4
 -4 -8 -10 37810.4 1056.76 5
 -4 -8 -11 67628.9 1479.25 5
 4 8 -11 67138.4 1742.72 5
 4 -8 -11 62958 1750.1 4
 4 -8 -11 66248.7 1580.92 5
 -4 -8 -11 68336.1 1782.73 4
 4 -8 -12 14626.1 785.11 5
 -4 -8 -12 10840.8 641.006 5
 4 -8 -12 13404.8 865.865 4
 4 8 -12 12781.2 829.887 5
 -4 -8 -12 9456.76 750.188 4
 -4 -8 -13 3813.09 523.173 4
 4 8 -13 4505.45 515.674 5
 -4 -8 -13 3697.89 393.842 5
 4 -8 -13 4833.98 497.322 5
 -4 8 -13 5311.27 542.431 5
 4 -8 -13 4977.51 530.569 4
 -4 8 -14 1999.19 381.058 5
 4 -8 -14 1946.48 330.089 5
 -4 -8 -14 1059.12 231.101 5
 4 -8 -14 1528.98 345.969 4
 4 8 -14 1798.61 355.85 5
 -4 -8 -14 1510.5 352.492 4
 4 8 -15 1086.13 310.915 5
 -4 8 -15 1118.05 311.381 5
 -4 -8 -15 980.608 220.98 5
 4 -8 -15 649.57 239.78 5
 -4 -8 -15 1134.92 289.053 4
 -4 8 -16 2919.62 443.638 5
 -4 -8 -16 3329.72 463.627 4
 -4 -8 -16 3269.21 375.023 5
 4 8 -16 3169.12 468.056 5
 4 -8 -16 3423.1 414.603 5
 -4 -8 -17 5837.02 464.086 5
 4 -8 -17 5444.24 517.307 5
 4 8 -17 5813.59 580.816 5
 -4 8 -17 6765.02 596.19 5
 -4 -8 -17 5866.1 583.575 4
 4 8 -18 5552.29 536.165 5
 -4 8 -18 5775.34 502.369 5
 4 8 -19 5675.49 462.831 5
 -4 -10 0 6410.57 332.848 2
 4 10 -1 42789 812.43 1
 -4 -10 1 44289 794.045 2
 4 -10 1 44717.3 957.047 1
 -4 -10 2 3528.43 223.737 2
 4 -10 2 3438.25 306.633 1
 4 10 -2 3809.07 284.435 1
 4 -10 3 84704.2 1613.28 1
 4 10 3 85048.1 1469.06 2
 4 10 -3 82550.7 1519.52 1
 4 10 -4 12.7516 104.995 1
 4 -10 4 181.923 147.255 1
 -4 10 4 132.568 41.4488 2
 -4 -10 5 7394.75 422.762 1
 4 10 -5 7805.16 585.65 1
 4 -10 5 7810.59 585.968 1
 -4 10 5 8512.42 271.148 2
 -4 -10 6 4228.45 362.792 1
 4 10 -6 4094.62 479.934 1
 4 -10 6 4192.86 475.306 1
 4 -10 -7 1224.22 204.062 5
 4 10 7 1239.58 311.742 1
 -4 -10 -7 1312.78 219.452 4
 -4 -10 -8 3878.94 389.954 4
 4 -10 -8 3677.76 346.038 5
 4 -10 -8 3514.41 379.43 4
 4 10 8 4107.61 537.794 1
 -4 -10 -9 75110 1395.22 5
 -4 -10 -9 76348.7 1744.11 4
 4 -10 -9 70097.6 1703.04 4
 4 -10 -9 67426.5 1545.77 5
 -4 -10 -10 6226.46 450.1 5
 4 -10 -10 6403.07 494.455 5
 4 -10 -10 5482.14 556.097 4
 -4 -10 -10 6620.48 581.97 4
 4 -10 -11 59245.6 1576.21 5
 -4 -10 -11 58405 1698.9 4
 4 -10 -11 56960.1 1686.21 4
 -4 -10 -12 1018.43 308.189 4
 -4 -10 -12 835.462 226.494 5
 4 -10 -12 1666.73 298.144 5
 4 10 -12 1594.71 357.979 5
 4 -10 -12 1706.6 410.045 4
 4 10 -13 9790.89 770.661 5
 4 -10 -13 9918.53 672.157 5
 -4 -10 -13 7829.92 540.885 5
 -4 -10 -13 7215.88 634.817 4
 4 -10 -13 9546.64 763.349 4
 -4 -10 -14 -327.946 162.375 5
 -4 -10 -14 293.031 230.945 4
 4 -10 -14 308.424 239.55 4
 -4 10 -14 303.967 192.511 5
 4 10 -14 141.236 175.412 5
 4 -10 -14 317.371 180.819 5
 -4 10 -15 1966.22 361.809 5
 4 10 -15 2453.47 406.337 5
 -4 -10 -15 2073.68 305.972 5
 -4 -10 -15 1863.01 380.993 4
 4 -10 -15 2053.92 329.376 5
 4 10 -16 2065.56 362.401 5
 4 -10 -16 1909.69 327.326 5
 -4 10 -16 1917.47 393.185 5
 -4 -10 -16 2162.03 292.36 5
 -4 -10 -16 1871.49 374.346 4
 -4 -10 -17 8722.19 698.979 4
 4 10 -17 9933.18 757.952 5
 -4 10 -17 10138.8 735.857 5
 4 10 -18 1993.86 315.491 5
 -4 10 -18 1765.15 303.905 5
 -4 -10 -18 1840.64 330.174 4
 4 10 -19 3337.36 383.616 5
 -4 -12 0 1250.43 156.45 2
 4 12 0 1155.01 138.143 1
 4 -12 0 1244.06 124.494 1
 -4 -12 1 54879.6 928.862 2
 4 12 -1 53436.9 1006.63 1
 4 -12 1 53711.4 1016.23 1
 4 12 -2 706.369 166.648 1
 4 12 2 640.882 109.751 2
 -4 -12 2 622.69 110.499 2
 4 -12 2 636.019 162.454 1
 4 12 3 393.841 109.037 2
 4 -12 3 389.645 142.478 1
 4 12 -3 409.741 139.866 1
 4 12 4 438.2 152.392 2
 4 -12 4 -45.2225 125.737 1
 4 12 -4 171.964 172.634 1
 -4 12 5 2608.4 129.274 2
 4 12 -5 3157.16 399.471 1
 4 -12 5 3331.77 384.303 1
 -4 12 6 1499.75 117.936 2
 4 12 -6 1194.29 320.223 1
 -4 -12 -7 1615.59 265.515 4
 4 -12 -7 1587.12 216.676 5
 4 12 7 1816.05 345.87 1
 4 -12 -7 1847.29 274.279 4
 4 -12 -8 1059.01 212.001 5
 4 -12 -8 1120.6 278.224 4
 -4 -12 -8 855.395 245.444 4
 -4 -12 -9 36127.4 1231.65 4
 4 -12 -9 39826.9 1111.1 5
 4 -12 -9 36151.7 1242.65 4
 -4 -12 -9 38594.6 998.081 5
 -4 -12 -10 2229.13 300.687 5
 4 -12 -10 2826.78 433.409 4
 4 -12 -10 3014.88 377.225 5
 -4 -12 -10 2639.51 417.106 4
 4 -12 -11 903.522 303.505 4
 -4 -12 -11 467.099 138.28 5
 4 -12 -11 730.598 200.662 5
 -4 -12 -11 887.005 256.803 4
 4 -12 -12 547.784 181.205 5
 -4 -12 -12 315.661 141.689 5
 4 12 -12 501.015 235.273 5
 -4 -12 -12 538.702 232.69 4
 4 -12 -12 122.591 201.335 4
 4 -12 -13 3730.67 548.487 4
 4 -12 -13 3393.84 415.116 5
 4 12 -13 3288.15 446.019 5
 -4 -12 -13 2285.83 290.632 5
 -4 -12 -13 3747.74 519.013 4
 4 -12 -14 183.519 175.312 5
 4 -12 -14 -66.402 235.625 4
 -4 12 -14 91.3153 184.009 5
 4 12 -14 116.455 197.126 5
 -4 -12 -14 295.602 179.843 5
 -4 -12 -14 80.5495 198.184 4
 -4 12 -15 48.425 146.503 5
 -4 -12 -15 257.615 140.873 5
 4 -12 -15 64.8045 143.372 5
 4 12 -15 244.904 196.372 5
 -4 -12 -15 -157.064 191.495 4
 -4 -12 -16 237.573 200.764 4
 4 12 -16 792.134 302.263 5
 -4 12 -16 222.048 166.864 5
 -4 12 -17 1745.94 333.777 5
 4 12 -17 1753.6 328.363 5
 -4 -12 -17 1740.35 366.626 4
 4 12 -18 203.619 124.032 5
 -4 12 -18 365.901 164.376 5
 4 12 -19 1031.11 220.409 5
 4 14 0 88.6364 77.1692 1
 4 -14 0 84.4445 43.2726 1
 -4 -14 0 66.5617 72.1374 2
 4 -14 1 681.626 119.109 1
 4 14 -1 771.535 146.463 1
 -4 -14 1 570.871 114.061 2
 -4 -14 2 228.653 83.7756 2
 4 14 -2 260.201 127.313 1
 4 -14 2 203.298 105.032 1
 4 14 3 11637.9 438.089 2
 4 14 -3 11420.9 680.223 1
 4 -14 3 11733.1 609.21 1
 4 14 -4 1222.21 273.254 1
 4 -14 4 1193.86 233.093 1
 4 14 4 1402.74 190.65 2
 4 -14 5 179345 2870.78 1
 4 14 -5 174147 3055.08 1
 4 14 5 179722 2394.05 2
 -4 -14 -6 5123.31 423.674 4
 4 14 -6 4542.65 573.304 1
 4 -14 -6 5157.59 447.788 4
 4 -14 -6 5401.87 399.501 5
 4 -14 -7 8823.35 583.404 4
 -4 -14 -7 8830.24 557.906 4
 4 -14 -7 8807.47 518.401 5
 -4 -14 -8 253.232 149.272 4
 -4 -14 -8 179.47 97.3653 5
 4 -14 -8 273.26 133.137 5
 4 -14 -8 54.4219 138.828 4
 4 -14 -9 2267.07 304.836 5
 -4 -14 -9 1721.85 214.687 5
 -4 -14 -9 1530.4 294.744 4
 4 -14 -9 1330.75 301.794 4
 4 -14 -10 -261.117 242.386 4
 -4 -14 -10 107.564 147.593 4
 4 -14 -10 121.414 145.596 5
 -4 -14 -10 199.09 114.926 5
 4 -14 -11 75.9379 130.156 5
 -4 -14 -11 182.921 199.897 4
 -4 -14 -11 39.5119 74.5083 5
 -4 -14 -12 1542.68 249.422 5
 4 -14 -12 1394.3 360.515 4
 4 -14 -12 2384.36 357.374 5
 -4 -14 -12 1789.53 408.209 4
 4 -14 -13 4812.91 490.77 5
 4 14 -13 4498.86 528.095 5
 4 -14 -13 4719.92 578.757 4
 -4 -14 -13 5191.97 598.531 4
 -4 -14 -13 5214.11 431.136 5
 4 14 -14 818.623 311.081 5
 -4 -14 -14 1706.49 422.726 4
 4 -14 -14 1392.4 316.564 5
 -4 14 -14 1340.74 347.449 5
 4 -14 -14 688.161 292.848 4
 4 14 -15 3487 481.343 5
 -4 14 -15 3853.47 496.944 5
 -4 -14 -15 3783.96 510.843 4
 4 14 -16 1346.42 313.071 5
 -4 14 -16 1146.79 281.404 5
 -4 -14 -16 828.205 261.702 4
 -4 14 -17 3086.63 413.583 5
 4 14 -17 2743.29 392.228 5
 -4 -14 -17 2466.44 390.125 4
 4 14 -18 62.3614 110.883 5
 -4 14 -18 143.049 140.839 5
 -4 -14 -18 206.305 168.216 4
 -4 -16 0 4187.04 333.577 2
 4 -16 0 3865.26 169.779 1
 4 16 0 4132.22 316.308 1
 4 -16 1 700.79 112.975 1
 4 16 -1 944.49 173.053 1
 4 16 1 831.857 126.157 1
 -4 -16 1 755.722 130.141 2
 -4 -16 2 303.496 101.352 2
 4 16 -2 551.383 173.513 1
 4 -16 2 242.561 104.283 1
 4 16 -3 31112.9 1194.8 1
 -4 -16 3 28424.4 786.189 2
 4 -16 3 29024.8 950.087 1
 4 -16 4 112535 2112.87 1
 4 16 -4 116768 2483.13 1
 4 16 4 118131 1414.92 2
 4 -16 5 120493 2351.05 1
 4 16 5 124327 1643.64 2
 4 -16 -5 124090 2057.57 4
 4 16 -5 118992 2688.03 1
 4 -16 -5 115192 2026.53 3
 -4 -16 -6 16583.1 736.691 4
 4 -16 -6 16923.4 798.473 4
 -4 -16 -7 27802.4 1007.03 4
 4 -16 -7 28094.5 1051.35 4
 4 -16 -8 10555.5 698.081 4
 -4 -16 -8 10276.8 663.848 4
 -4 -16 -9 12268.8 757.956 4
 4 -16 -9 11354.9 772.888 4
 -4 -16 -10 431.244 246.067 4
 4 -16 -10 226.586 167.239 5
 4 -16 -10 172.09 189.696 4
 4 -16 -11 9770.65 808.944 4
 -4 -16 -11 12332.8 857.744 4
 4 -16 -12 1236.67 328.333 4
 -4 -16 -12 2614.8 475.249 4
 4 16 -13 17833.3 1067.05 5
 4 -16 -13 17103.2 1118.91 4
 -4 -16 -13 20154.5 1134.32 4
 4 16 -14 4464.3 547.746 5
 -4 -16 -14 5539.02 626.005 4
 -4 16 -15 18165.6 1058.9 5
 -4 -16 -15 17995.1 1048.08 4
 4 16 -15 16931.6 996.396 5
 -4 16 -16 7440.09 669.988 5
 -4 -16 -16 6599.98 639.341 4
 4 16 -16 6988.74 628.115 5
 4 16 -17 4582.44 480.21 5
 -4 16 -17 4208.43 466.81 5
 -4 -16 -17 4976.63 536.481 4
 4 16 -18 3109.21 363.401 5
 -4 16 -18 3036.85 357.246 5
 -4 -16 -18 2565 363.4 4
 -4 -18 0 381.256 124.32 2
 4 18 0 306.826 128.593 1
 -4 -18 1 331.981 108.354 2
 4 -18 1 437.897 89.2159 1
 4 18 -1 486.687 166.563 1
 4 18 1 568.022 149.923 1
 4 18 2 11993 469.098 1
 -4 -18 2 11321.2 535.722 2
 4 -18 2 11167.8 496.596 1
 4 -18 3 90048.7 1609.03 1
 -4 -18 3 93670.6 1550.58 2
 4 -18 -4 63569.3 1535.53 3
 4 -18 -4 64857.5 1509.42 4
 4 18 -4 66884.8 2014 1
 4 -18 4 62188.7 1534.12 1
 4 -18 -5 75980.4 1707.93 4
 -4 -18 -5 78236.8 1529.38 4
 4 -18 -5 76091.3 1753.93 3
 4 -18 -6 60095.3 1537.2 4
 -4 -18 -6 57765.1 1409.71 4
 4 -18 -7 21852.6 982.711 4
 -4 -18 -7 22623.7 934.944 4
 4 -18 -8 23947.1 1074.97 4
 -4 -18 -8 24717.2 1042.22 4
 4 -18 -9 2063.2 384.626 4
 -4 -18 -9 2316.77 378.797 4
 -4 -18 -10 3246.22 443.596 4
 4 -18 -10 3207.97 479.867 4
 4 -18 -11 3301.39 500.105 4
 -4 -18 -11 3929.74 521.409 4
 4 -18 -12 14671.3 1028.67 4
 -4 -18 -12 14126.1 963.41 4
 -4 -18 -13 2454.99 463.032 4
 4 18 -13 2040.29 422.464 5
 4 -18 -13 2600.83 474.897 4
 -4 -18 -14 11733.2 904.901 4
 4 18 -14 12282.6 882.101 5
 -4 18 -15 11478 879.734 5
 4 18 -15 10713.5 807.595 5
 -4 -18 -15 10292.6 820.174 4
 -4 18 -16 9532.57 759.445 5
 4 18 -16 10143.3 728.278 5
 -4 -18 -16 8750.26 717.139 4
 -4 -18 -17 6812.27 593.536 4
 4 18 -17 5877.46 553.609 5
 -4 18 -17 6799.94 572.451 5
 -4 18 -18 3341.04 358.313 5
 4 18 -18 3024.97 351.238 5
 4 -20 0 93172.4 1750.52 3
 4 20 0 100731 1865.33 1
 4 -20 -1 1442.93 238.872 3
 -4 -20 1 1280.86 225.606 2
 4 20 -1 1363.44 261.602 1
 4 -20 1 1049.63 189.436 3
 4 20 1 1420.3 207.085 1
 -4 -20 2 56912.7 1272.56 2
 4 -20 2 58922.4 1370.08 3
 4 20 -2 63254.8 1805.17 1
 4 20 2 60214.6 1134.72 1
 4 -20 -2 61332.7 1497.14 3
 4 -20 -3 7039.1 535.394 3
 4 -20 3 6226.41 473.281 3
 4 20 -3 6747.24 646.489 1
 4 -20 3 5822.47 408.393 1
 -4 -20 3 5913.47 428.85 2
 4 20 -4 35145.2 1588.68 1
 4 -20 -4 33046.8 1171.02 3
 -4 -20 -4 29786.6 918.141 3
 4 -20 4 30401.7 1021.15 1
 -4 -20 -4 32654.1 982.197 4
 -4 -20 -5 1188 260.842 4
 4 -20 -5 1173.13 264.016 3
 4 -20 -5 1408.32 278.803 4
 -4 -20 -6 24049.3 943.927 4
 4 -20 -6 22718.1 1022.05 4
 -4 -20 -7 2686.69 363.073 4
 4 -20 -7 2179.75 355.871 4
 4 -20 -8 841.227 266.605 4
 -4 -20 -8 983.702 246.708 4
 4 -20 -9 883.885 289.429 4
 -4 -20 -9 554.699 213.467 4
 -4 -20 -10 432.688 236.904 4
 4 -20 -10 499.693 288.258 4
 -4 -20 -11 615.277 279.612 4
 4 -20 -11 113.966 244.215 4
 -4 -20 -12 188.763 206.094 4
 4 -20 -12 -502.328 341.791 4
 -4 -20 -13 4378.93 582.529 4
 4 20 -13 3673.6 507.316 5
 4 20 -14 2862.2 454.103 5
 -4 -20 -14 2932.55 471.286 4
 -4 20 -15 2552.45 449.82 5
 4 20 -15 1999.45 377.12 5
 -4 -20 -15 2029.47 416.187 4
 4 20 -16 5565.95 549.648 5
 -4 20 -16 6527.02 613.632 5
 -4 -20 -16 6069.73 597.021 4
 -4 20 -17 476.863 182.685 5
 -4 -20 -17 213.674 195.249 4
 4 20 -17 752.404 206.305 5
 -4 -22 0 49665.9 1220.34 3
 4 -22 0 51978.8 1369.36 3
 4 -22 1 2284.4 297.976 3
 -4 -22 1 2589.2 287.433 3
 4 -22 -1 2541.97 330.282 3
 -4 -22 -1 2402.5 282.545 3
 4 22 -1 2152.02 323.446 1
 4 -22 2 9981.16 594.169 3
 -4 -22 2 10618.1 584.503 3
 4 22 -2 11727 811.302 1
 4 -22 -2 11190.5 672.778 3
 -4 -22 -2 9395.36 548.713 3
 4 -22 3 2298.47 298.136 3
 -4 -22 -3 2088.69 264.175 3
 4 22 -3 2321.85 402.35 1
 -4 -22 -3 2262.89 269.451 4
 4 -22 -3 2362.89 339.323 3
 -4 -22 3 2348.14 308.929 3
 -4 -22 -4 6573.33 460.341 3
 4 -22 4 7142.97 550.071 3
 4 -22 -4 7712 603.855 3
 -4 -22 -4 7404.79 489.165 4
 4 -22 -5 1020.86 256.664 3
 -4 -22 -5 1270.08 251.605 4
 -4 -22 -6 4524.82 423.549 4
 4 -22 -6 4872.03 504.016 4
 4 -22 -7 534.939 225.421 4
 -4 -22 -7 731.252 197.866 4
 -4 -22 -8 15165.9 859.169 4
 4 -22 -8 14367.8 909.615 4
 4 -22 -9 428.928 309.803 4
 -4 -22 -9 814.554 278.91 4
 4 -22 -10 805.442 326.565 4
 -4 -22 -10 1072.82 316.074 4
 -4 -22 -11 4793.92 612.62 4
 4 -22 -11 4466.45 617.368 4
 -4 -22 -12 2113.59 388.176 4
 -4 -22 -13 1259.34 335.421 4
 -4 -22 -14 1426.28 360.944 4
 4 22 -14 1229.58 304.476 5
 4 22 -15 -103.525 176.403 5
 -4 -22 -15 79.8972 233.786 4
 -4 22 -15 184.479 210.912 5
 4 22 -16 96.9102 182.589 5
 -4 22 -16 -56.3188 128.229 5
 -4 -22 -16 -56.2379 186.671 4
 -4 22 -17 48.9121 100.398 5
 4 22 -17 75.3395 95.4448 5
 -4 -22 -17 37.984 140.839 4
 -4 -24 0 65414.2 1492.75 3
 4 -24 0 69022.3 1647.36 3
 -4 -24 1 2058.22 275.01 3
 4 -24 -1 2195.12 335.524 3
 -4 -24 -1 2173.74 302.447 3
 4 -24 1 2091.57 292.402 3
 4 -24 -2 40030 1334.33 3
 4 -24 2 36423 1169.5 3
 -4 -24 2 38428.4 1147.87 3
 -4 -24 -3 13.7311 105.607 4
 -4 -24 3 303.585 143.665 3
 4 -24 3 353.544 144.233 3
 -4 -24 -3 124.796 108.389 3
 4 -24 -3 291.915 207.881 3
 -4 -24 -4 1116.65 209.411 3
 4 -24 -4 1364.62 297.587 3
 4 -24 4 965.378 214.914 3
 -4 -24 -4 1088.8 198.937 4
 -4 -24 4 964.586 187.634 3
 4 -24 -5 191.424 183.613 3
 4 -24 5 110.153 102.432 3
 -4 -24 -5 25.0962 133.556 4
 -4 -24 -6 5431.01 498.698 4
 -4 -24 -7 2257.96 394.946 4
 -4 -24 -8 29023 1215.89 4
 4 -24 -8 26879.2 1274.58 4
 4 -24 -9 3100.04 561.634 4
 -4 -24 -9 2641.9 459.62 4
 -4 -24 -10 33837 1406.56 4
 -4 -24 -11 707.309 290.807 4
 -4 -24 -12 17925.4 1067.97 4
 -4 -24 -13 641.037 285.12 4
 -4 -24 -14 7066.23 665.257 4
 4 24 -14 7872.26 654.489 5
 -4 -24 -15 773.631 294.033 4
 4 24 -15 790.09 240.76 5
 -4 24 -15 530.495 230.074 5
 4 24 -16 1739.18 295.732 5
 -4 24 -16 1775.23 302.181 5
 -4 -24 -16 1784.3 327.335 4
 4 24 -17 559.529 170.315 5
 4 -24 17 428.367 151.074 3
 -4 24 -17 349.738 121.23 5
 -4 -26 0 94644.7 1896.7 3
 4 -26 0 97707.1 2058.11 3
 -4 -26 1 4591.54 426.784 3
 -4 -26 -1 4229.18 415.58 3
 4 -26 -1 4874.31 500.567 3
 4 -26 1 4968.42 474.018 3
 -4 -26 2 51236.5 1401.81 3
 4 -26 2 48490.4 1415.46 3
 -4 -26 -2 48303.6 1350.85 3
 4 -26 -2 52333 1608.66 3
 4 -26 3 4685.84 457.935 3
 -4 -26 3 5137.23 463.499 3
 4 -26 -3 5138.92 555.753 3
 -4 -26 -3 4617.63 436.01 3
 -4 -26 4 25519.2 1029.32 3
 4 -26 4 23536.2 1031.5 3
 -4 -26 -4 24220 984.065 3
 -4 -26 -4 26228.4 1005.09 4
 4 -26 -4 26951.7 1234.79 3
 4 -26 -5 448.976 220.147 3
 4 -26 5 569.682 201.561 3
 -4 -26 -5 609.689 234.202 4
 -4 -26 5 494.575 154.122 3
 4 -26 6 7832.26 636.816 3
 -4 -26 -6 9584.22 666.949 4
 4 -26 7 4550.12 512.812 3
 -4 -26 -7 5305.34 532.023 4
 -4 -26 -8 53069.7 1646.55 4
 -4 -26 -9 9849.94 777.694 4
 -4 -26 -10 27281 1269.69 4
 -4 -26 -11 5935.3 688.156 4
 -4 -26 -12 4814.77 554.791 4
 -4 -26 -13 2477.11 466.428 4
 4 26 -14 11804 786.747 5
 -4 -26 -14 11685 814.53 4
 -4 26 -15 2077 349.27 5
 -4 -26 -15 2165.74 386.782 4
 4 -26 15 1786.56 328.604 3
 4 26 -15 2096.96 347.431 5
 4 26 -16 1156.71 227.381 5
 -4 26 -16 1530.22 276.899 5
 4 -26 16 1139.08 235.625 3
 -4 -26 16 1097.83 224.551 3
 -4 -28 0 22598 984.549 3
 4 -28 0 24146.6 1092.41 3
 4 -28 -1 14290.3 865.001 3
 -4 -28 1 14214.9 770.247 3
 -4 -28 -1 13992.3 773.676 3
 4 -28 1 13759.3 801.72 3
 4 -28 -2 31660.2 1319.19 3
 -4 -28 -2 30015.5 1118.11 3
 4 -28 2 30238.9 1171.08 3
 -4 -28 2 31330.3 1127.88 3
 4 -28 3 6752.62 565.662 3
 4 -28 -3 7251.42 660.532 3
 -4 -28 -3 6734.91 535.25 3
 -4 -28 3 7363.97 565.096 3
 4 -28 -4 767.051 264.877 3
 -4 -28 4 807.528 209.692 3
 -4 -28 -4 728.106 199.94 3
 4 -28 4 816.422 243.15 3
 -4 -28 -4 948.509 216.137 4
 -4 -28 -5 340.839 164.988 4
 4 -28 -5 646.747 287.878 3
 4 -28 5 413.555 161.115 3
 -4 -28 5 309.896 153.275 3
 -4 -28 -6 1177.27 250.736 4
 -4 -28 6 914.889 241.13 3
 4 -28 6 1364.52 281.421 3
 -4 -28 7 3515.9 431.224 3
 4 -28 7 3796.98 483.766 3
 4 -28 8 1309.07 285.038 3
 -4 -28 8 1662.94 355.304 3
 -4 -28 -8 1182.14 312.601 4
 -4 -28 -9 4676.15 532.182 4
 4 -28 9 4831.84 559.916 3
 4 -28 10 30120.4 1350.99 3
 -4 -28 -10 29771.3 1329.89 4
 -4 -28 -11 7185.43 693.524 4
 4 -28 11 6736.51 661.892 3
 4 -28 12 14276.3 919.391 3
 -4 -28 -12 13321 912.698 4
 -4 -28 -13 984.742 275.557 4
 4 -28 13 943.969 262.312 3
 4 -28 14 1269.66 271.71 3
 4 28 -14 1338.7 274.699 5
 -4 -28 -14 1393.96 308.056 4
 -4 -28 14 1446.46 293.236 3
 4 28 -15 1301.67 266.835 5
 -4 28 -15 2063.36 321.85 5
 4 -28 15 1624.28 276.528 3
 -4 -28 15 1614.29 293.648 3
 4 -28 16 541.245 168.151 3
 -4 28 -16 507.231 169.386 5
 -4 -30 0 3069.18 379.654 3
 4 -30 0 3264.89 448.642 3
 -4 -30 -1 1260.11 254.968 3
 4 -30 1 1086.77 267.468 3
 4 -30 -1 1283.61 278.505 3
 -4 -30 1 1232.96 252.613 3
 4 -30 2 2066.74 340.4 3
 -4 -30 2 2002.17 307.197 3
 4 -30 -2 2489.07 413.067 3
 -4 -30 -2 2017.01 326.211 3
 -4 -30 -3 1714.82 295.309 3
 4 -30 -3 2123.06 379.131 3
 4 -30 3 1828.63 318.18 3
 -4 -30 3 1916.05 312.188 3
 4 -30 4 483.626 195.803 3
 -4 -30 -4 666.079 212.159 3
 4 -30 -4 636.617 289.346 3
 -4 -30 4 465.128 168.012 3
 -4 -30 5 55.2922 137.112 3
 -4 -30 -5 282.407 183.914 4
 4 -30 5 302.252 138.315 3
 4 -30 6 298.388 172.635 3
 -4 -30 6 247.992 148.085 3
 -4 -30 -6 593.034 253.045 4
 -4 -30 -7 4484.32 501.785 4
 4 -30 7 5996.68 582.154 3
 -4 -30 7 6034.79 570.305 3
 4 -30 8 6232.69 620.755 3
[truncated: 407,028 more chars]
