# Supplementary material
Source: publisher figshare collection journal article supplement (https://acs.figshare.com/ndownloader/files/16775912)
Supplement: Supplementary file 1 [file 16775912 › LIFM-114-60C.cif]

data_LIFM-114-60C
_audit_creation_date               2018-06-29
_audit_creation_method
;
Olex2 1.2
(compiled 2018.05.29 svn.r3508 for OlexSys, GUI svn.r5506)
;
_shelx_SHELXL_version_number       '2014/7'
_audit_contact_author_address      ?
_audit_contact_author_email        ?
_audit_contact_author_name         ''
_audit_contact_author_phone        ?
_publ_contact_author_id_orcid      ?
_publ_section_references
;
Dolomanov, O.V., Bourhis, L.J., Gildea, R.J, Howard, J.A.K. & Puschmann, H.
 (2009), J. Appl. Cryst. 42, 339-341.

Sheldrick, G.M. (2015). Acta Cryst. C71, 3-8.
;
_chemical_name_common              LIFM-114-60C
_chemical_name_systematic          ?
_chemical_formula_moiety           '0.5(C216 H128 O64 Zr12)'
_chemical_formula_sum              'C108 H64 O32 Zr6'
_chemical_formula_weight           2420.91
_chemical_melting_point            ?
_chemical_oxdiff_usercomment       114-60
loop_
  _atom_type_symbol
  _atom_type_description
  _atom_type_scat_dispersion_real
  _atom_type_scat_dispersion_imag
  _atom_type_scat_source
 'C' 'C' 0.0181 0.0091 'International Tables Vol C Tables 4.2.6.8 and 6.1.1.4'
 'H' 'H' 0.0000 0.0000 'International Tables Vol C Tables 4.2.6.8 and 6.1.1.4'
 'O' 'O' 0.0492 0.0322 'International Tables Vol C Tables 4.2.6.8 and 6.1.1.4'
 'Zr' 'Zr' -0.1862 2.2449
 'International Tables Vol C Tables 4.2.6.8 and 6.1.1.4'

_shelx_space_group_comment
;
The symmetry employed for this shelxl refinement is uniquely defined
by the following loop, which should always be used as a source of
symmetry information in preference to the above space-group names.
They are only intended as comments.
;
_space_group_crystal_system        'orthorhombic'
_space_group_IT_number             67
_space_group_name_H-M_alt          'C m m e'
_space_group_name_Hall             '-C 2b 2'
loop_
  _space_group_symop_operation_xyz
 'x, y, z'
 '-x, -y+1/2, z'
 'x, -y, -z'
 '-x, y+1/2, -z'
 'x+1/2, y+1/2, z'
 '-x+1/2, -y+1, z'
 'x+1/2, -y+1/2, -z'
 '-x+1/2, y+1, -z'
 '-x, -y, -z'
 'x, y-1/2, -z'
 '-x, y, z'
 'x, -y-1/2, z'
 '-x+1/2, -y+1/2, -z'
 'x+1/2, y, -z'
 '-x+1/2, y+1/2, z'
 'x+1/2, -y, z'

_cell_length_a                     21.8356(8)
_cell_length_b                     42.279(2)
_cell_length_c                     17.9114(3)
_cell_angle_alpha                  90
_cell_angle_beta                   90
_cell_angle_gamma                  90
_cell_volume                       16535.4(11)
_cell_formula_units_Z              4
_cell_measurement_reflns_used      9718
_cell_measurement_temperature      150.00(10)
_cell_measurement_theta_max        65.6630
_cell_measurement_theta_min        4.7350
_shelx_estimated_absorpt_T_max     0.935
_shelx_estimated_absorpt_T_min     0.342
_exptl_absorpt_coefficient_mu      3.418
_exptl_absorpt_correction_T_max    1.00000
_exptl_absorpt_correction_T_min    0.57317
_exptl_absorpt_correction_type     multi-scan
_exptl_absorpt_process_details
;
CrysAlisPro 1.171.38.43 (Rigaku Oxford Diffraction, 2015)
Empirical absorption correction using spherical harmonics,
 implemented in SCALE3 ABSPACK scaling algorithm.
;
_exptl_absorpt_special_details     ?
_exptl_crystal_colour              colourless
_exptl_crystal_density_diffrn      0.972
_exptl_crystal_density_meas        ?
_exptl_crystal_density_method      ?
_exptl_crystal_description         Rod
_exptl_crystal_F_000               4832
_exptl_crystal_size_max            0.3
_exptl_crystal_size_mid            0.1
_exptl_crystal_size_min            0.1
_exptl_transmission_factor_max     ?
_exptl_transmission_factor_min     ?
_diffrn_reflns_av_R_equivalents    0.0282
_diffrn_reflns_av_unetI/netI       0.0286
_diffrn_reflns_Laue_measured_fraction_full  0.978
_diffrn_reflns_Laue_measured_fraction_max  0.978
_diffrn_reflns_limit_h_max         25
_diffrn_reflns_limit_h_min         -11
_diffrn_reflns_limit_k_max         48
_diffrn_reflns_limit_k_min         -39
_diffrn_reflns_limit_l_max         19
_diffrn_reflns_limit_l_min         -21
_diffrn_reflns_number              18750
_diffrn_reflns_point_group_measured_fraction_full  0.978
_diffrn_reflns_point_group_measured_fraction_max  0.978
_diffrn_reflns_theta_full          65.558
_diffrn_reflns_theta_max           65.558
_diffrn_reflns_theta_min           3.358
_diffrn_ambient_environment        N~2~
_diffrn_ambient_temperature        150.00(10)
_diffrn_detector                   'CCD plate'
_diffrn_detector_area_resol_mean   5.2913
_diffrn_detector_type              AtlasS2
_diffrn_measured_fraction_theta_full  0.978
_diffrn_measured_fraction_theta_max  0.978
_diffrn_measurement_details
;
List of Runs (angles in degrees, time in seconds):

  # Type    Start    End  Width  t~exp~   \w     \q     \k     \f   Frames
--------------------------------------------------------------------------
  1  \w     23.00  49.00   1.00    8.00    --    1.62  37.00 -60.00   26
  2  \w     -8.00  67.00   1.00    8.00    --    1.62  57.00-180.00   75
  3  \w    109.00 157.00   1.00   13.00    --   88.73  45.00-120.00   48
  4  \w    103.00 145.00   1.00   13.00    --   88.73 120.00-130.00   42
  5  \w     67.00 148.00   1.00   13.00    --   88.73  45.00 150.00   81
  6  \w      9.00 109.00   1.00   13.00    --   88.73 -94.00  30.00  100
;
_diffrn_measurement_device         'four-circle diffractometer'
_diffrn_measurement_device_type    'SuperNova, Dual, Cu at zero, AtlasS2'
_diffrn_measurement_method         '\w scans'
_diffrn_orient_matrix_type        
 'CrysAlisPro convention (1999,Acta A55,543-557)'
_diffrn_orient_matrix_UB_11        0.0695006000
_diffrn_orient_matrix_UB_12        -0.0048180000
_diffrn_orient_matrix_UB_13        0.0098070000
_diffrn_orient_matrix_UB_21        0.0086190000
_diffrn_orient_matrix_UB_22        0.0020112000
_diffrn_orient_matrix_UB_23        -0.0852324000
_diffrn_orient_matrix_UB_31        0.0087533000
_diffrn_orient_matrix_UB_32        0.0360472000
_diffrn_orient_matrix_UB_33        0.0061127000
_diffrn_radiation_monochromator    mirror
_diffrn_radiation_probe            x-ray
_diffrn_radiation_type             CuK\a
_diffrn_radiation_wavelength       1.54178
_diffrn_source                     'micro-focus sealed X-ray tube'
_diffrn_source_type                'SuperNova (Cu) X-ray Source'
_reflns_Friedel_coverage           0.000
_reflns_Friedel_fraction_full      .
_reflns_Friedel_fraction_max       .
_reflns_number_gt                  6303
_reflns_number_total               7286
_reflns_odcompleteness_completeness  99.85
_reflns_odcompleteness_iscentric   1
_reflns_odcompleteness_theta       61.08
_reflns_special_details
;
 Reflections were merged by SHELXL according to the crystal
 class for the calculation of statistics and refinement.
 
 Structure factors included contributions from the .fab file.
 
 _reflns_Friedel_fraction is defined as the number of unique
 Friedel pairs measured divided by the number that would be
 possible theoretically, ignoring centric projections and
 systematic absences.
;
_reflns_threshold_expression       'I > 2\s(I)'
_computing_cell_refinement         'CrysAlisPro 1.171.38.43 (Rigaku OD, 2015)'
_computing_data_collection         'CrysAlisPro 1.171.38.43 (Rigaku OD, 2015)'
_computing_data_reduction          'CrysAlisPro 1.171.38.43 (Rigaku OD, 2015)'
_computing_molecular_graphics      'Olex2 (Dolomanov et al., 2009)'
_computing_publication_material    'Olex2 (Dolomanov et al., 2009)'
_computing_structure_refinement    'ShelXL (Sheldrick, 2015)'
_computing_structure_solution      ?
_refine_diff_density_max           1.093
_refine_diff_density_min           -1.183
_refine_diff_density_rms           0.113
_refine_ls_extinction_coef         .
_refine_ls_extinction_method       none
_refine_ls_goodness_of_fit_ref     1.115
_refine_ls_hydrogen_treatment      constr
_refine_ls_matrix_type             full
_refine_ls_number_parameters       344
_refine_ls_number_reflns           7286
_refine_ls_number_restraints       511
_refine_ls_R_factor_all            0.0595
_refine_ls_R_factor_gt             0.0541
_refine_ls_restrained_S_all        1.203
_refine_ls_shift/su_max            0.000
_refine_ls_shift/su_mean           0.000
_refine_ls_structure_factor_coef   Fsqd
_refine_ls_weighting_details      
 'w=1/[\s^2^(Fo^2^)+(0.0895P)^2^+104.2751P] where P=(Fo^2^+2Fc^2^)/3'
_refine_ls_weighting_scheme        calc
_refine_ls_wR_factor_gt            0.1717
_refine_ls_wR_factor_ref           0.1767
_refine_special_details            ?
_olex2_refinement_description
;
1. Fixed Uiso
 At 1.2 times of:
  All C(H) groups
2. Rigid bond restraints
 C1, C2, C3, C4, C5, C6, C7, C8, C9, C10, C11, C12, C13, C14, C15, C16, C17,
 C18, C19, C20, C21, C22, C23, C24, C25, C26, C27, C28
 with sigma for 1-2 distances of 0.01 and sigma for 1-3 distances of 0.01
3. Uiso/Uaniso restraints and constraints
C1 \\sim C2 \\sim C3 \\sim C4 \\sim C5 \\sim C6 \\sim C7 \\sim C8 \\sim C9
\\sim C10 \\sim C11 \\sim C12 \\sim C13 \\sim C14 \\sim C15 \\sim C16 \\sim C17
\\sim C18 \\sim C19 \\sim C20 \\sim C21 \\sim C22 \\sim C23 \\sim C24 \\sim C25
\\sim C26 \\sim C27 \\sim C28: within 2A with sigma of 0.01 and sigma for
terminal atoms of 0.02
Uanis(O5) \\sim Ueq, Uanis(O6) \\sim Ueq: with sigma of 0.005 and sigma for
terminal atoms of 0.01
All non-hydrogen atoms restrained to be isotropic: with sigma of 0.01 and sigma
for terminal atoms of 0.02
4.a Aromatic/amide H refined with riding coordinates:
 C3(H3), C4(H4), C6(H6), C7(H7), C9(H9), C10(H10), C12(H12), C13(H13),
 C17(H17), C18(H18), C20(H20), C21(H21), C23(H23), C24(H24), C26(H26), C27(H27)
;
_atom_sites_solution_hydrogens     geom
_atom_sites_solution_primary       ?
_atom_sites_solution_secondary     ?
loop_
  _atom_site_label
  _atom_site_type_symbol
  _atom_site_fract_x
  _atom_site_fract_y
  _atom_site_fract_z
  _atom_site_U_iso_or_equiv
  _atom_site_adp_type
  _atom_site_occupancy
  _atom_site_site_symmetry_order
  _atom_site_calc_flag
  _atom_site_refinement_flags_posn
  _atom_site_refinement_flags_adp
  _atom_site_refinement_flags_occupancy
  _atom_site_disorder_assembly
  _atom_site_disorder_group
 Zr1 Zr 0.0000 0.30799(2) 0.22695(2) 0.01705(16) Uani 1 2 d S T P . .
 Zr2 Zr 0.08088(3) 0.2500 0.12796(3) 0.02323(17) Uani 1 2 d S T P . .
 Zr3 Zr 0.08109(3) 0.2500 0.32587(3) 0.02509(17) Uani 1 2 d S T P . .
 O1 O 0.06046(16) 0.33474(7) 0.30131(17) 0.0294(7) Uani 1 1 d . . . . .
 O2 O 0.1113(2) 0.29802(8) 0.3671(2) 0.0512(11) Uani 1 1 d . . . . .
 O3 O 0.43930(16) 0.66531(7) 1.15235(17) 0.0305(7) Uani 1 1 d . . . . .
 O4 O 0.3880(2) 0.70175(8) 1.0870(2) 0.0499(11) Uani 1 1 d . . . . .
 O5 O 0.0000 0.27801(13) 0.1288(4) 0.0573(16) Uani 1 2 d S TU P . .
 O6 O 0.0000 0.27810(14) 0.3260(4) 0.0605(17) Uani 1 2 d S TU P . .
 O7 O 0.0814(3) 0.27816(10) 0.22665(18) 0.0629(15) Uani 1 1 d . . . . .
 O8 O 0.0743(3) 0.2500 0.0064(3) 0.0563(16) Uani 1 2 d S T P . .
 O9 O 0.1813(2) 0.2500 0.1293(4) 0.0548(16) Uani 1 2 d S T P . .
 O10 O 0.0746(3) 0.2500 0.4503(3) 0.0550(16) Uani 1 2 d S T P . .
 O11 O 0.1819(3) 0.2500 0.3234(4) 0.0597(17) Uani 1 2 d S T P . .
 C1 C 0.0944(3) 0.32602(11) 0.3548(3) 0.0368(11) Uani 1 1 d . U . . .
 C2 C 0.1149(3) 0.35118(12) 0.4076(3) 0.0466(13) Uani 1 1 d . U . . .
 C3 C 0.1514(4) 0.34409(14) 0.4688(4) 0.0695(18) Uani 1 1 d . U . . .
 H3 H 0.1631 0.3228 0.4775 0.083 Uiso 1 1 calc R . . . .
 C4 C 0.1709(4) 0.36712(14) 0.5168(4) 0.0732(18) Uani 1 1 d . U . . .
 H4 H 0.1958 0.3616 0.5583 0.088 Uiso 1 1 calc R . . . .
 C5 C 0.1547(3) 0.39871(13) 0.5055(3) 0.0569(14) Uani 1 1 d . U . . .
 C6 C 0.1165(4) 0.40555(14) 0.4459(3) 0.0609(16) Uani 1 1 d . U . . .
 H6 H 0.1040 0.4268 0.4375 0.073 Uiso 1 1 calc R . . . .
 C7 C 0.0960(3) 0.38189(13) 0.3980(3) 0.0572(15) Uani 1 1 d . U . . .
 H7 H 0.0688 0.3870 0.3584 0.069 Uiso 1 1 calc R . . . .
 C8 C 0.1777(3) 0.42437(13) 0.5557(3) 0.0546(14) Uani 1 1 d . U . . .
 C9 C 0.2228(4) 0.41892(14) 0.6069(3) 0.0620(16) Uani 1 1 d . U . . .
 H9 H 0.2382 0.3981 0.6129 0.074 Uiso 1 1 calc R . . . .
 C10 C 0.2469(4) 0.44328(14) 0.6505(4) 0.0639(16) Uani 1 1 d . U . . .
 H10 H 0.2790 0.4388 0.6847 0.077 Uiso 1 1 calc R . . . .
 C11 C 0.2254(3) 0.47313(12) 0.6451(3) 0.0516(14) Uani 1 1 d . U . . .
 C12 C 0.1804(4) 0.47847(16) 0.5940(4) 0.087(2) Uani 1 1 d . U . . .
 H12 H 0.1659 0.4995 0.5872 0.104 Uiso 1 1 calc R . . . .
 C13 C 0.1551(5) 0.45456(16) 0.5518(4) 0.088(2) Uani 1 1 d . U . . .
 H13 H 0.1217 0.4591 0.5195 0.105 Uiso 1 1 calc R . . . .
 C14 C 0.2500 0.5000 0.6905(4) 0.0469(17) Uani 1 2 d S TU P . .
 C15 C 0.2500 0.5000 0.7649(4) 0.0460(17) Uani 1 2 d S TU P . .
 C16 C 0.2758(3) 0.52694(13) 0.8106(3) 0.0468(12) Uani 1 1 d . U . . .
 C17 C 0.2365(3) 0.54482(16) 0.8542(3) 0.0615(16) Uani 1 1 d . U . . .
 H17 H 0.1939 0.5403 0.8547 0.074 Uiso 1 1 calc R . . . .
 C18 C 0.2597(3) 0.56940(16) 0.8970(4) 0.0597(15) Uani 1 1 d . U . . .
 H18 H 0.2322 0.5821 0.9251 0.072 Uiso 1 1 calc R . . . .
 C19 C 0.3209(3) 0.57590(13) 0.9000(3) 0.0476(12) Uani 1 1 d . U . . .
 C20 C 0.3597(3) 0.55733(15) 0.8580(4) 0.0613(16) Uani 1 1 d . U . . .
 H20 H 0.4026 0.5608 0.8603 0.074 Uiso 1 1 calc R . . . .
 C21 C 0.3365(4) 0.53346(15) 0.8121(4) 0.0617(15) Uani 1 1 d . U . . .
 H21 H 0.3637 0.5216 0.7815 0.074 Uiso 1 1 calc R . . . .
 C22 C 0.3443(3) 0.60146(12) 0.9494(3) 0.0465(12) Uani 1 1 d . U . . .
 C23 C 0.3156(3) 0.63091(14) 0.9509(4) 0.0612(16) Uani 1 1 d . U . . .
 H23 H 0.2818 0.6348 0.9188 0.073 Uiso 1 1 calc R . . . .
 C24 C 0.3355(3) 0.65441(14) 0.9980(4) 0.0588(15) Uani 1 1 d . U . . .
 H24 H 0.3166 0.6746 0.9966 0.071 Uiso 1 1 calc R . . . .
 C25 C 0.3831(3) 0.64877(11) 1.0477(3) 0.0403(11) Uani 1 1 d . U . . .
 C26 C 0.4115(3) 0.61933(13) 1.0477(3) 0.0503(14) Uani 1 1 d . U . . .
 H26 H 0.4440 0.6151 1.0814 0.060 Uiso 1 1 calc R . . . .
 C27 C 0.3919(3) 0.59617(13) 0.9979(4) 0.0543(14) Uani 1 1 d . U . . .
 H27 H 0.4119 0.5762 0.9975 0.065 Uiso 1 1 calc R . . . .
 C28 C 0.4046(3) 0.67400(11) 1.0995(3) 0.0349(11) Uani 1 1 d . U . . .

loop_
  _atom_site_aniso_label
  _atom_site_aniso_U_11
  _atom_site_aniso_U_22
  _atom_site_aniso_U_33
  _atom_site_aniso_U_23
  _atom_site_aniso_U_13
  _atom_site_aniso_U_12
 Zr1 0.0374(3) 0.0027(3) 0.0110(2) 0.00017(16) 0.000 0.000
 Zr2 0.0421(3) 0.0075(3) 0.0201(3) 0.000 0.0107(2) 0.000
 Zr3 0.0481(4) 0.0072(3) 0.0199(3) 0.000 -0.0130(2) 0.000
 O1 0.054(2) 0.0106(14) 0.0231(15) -0.0022(12) -0.0055(15) -0.0069(14)
 O2 0.084(3) 0.0154(17) 0.054(2) -0.0047(16) -0.040(2) -0.0003(18)
 O3 0.0532(19) 0.0133(15) 0.0250(15) -0.0025(12) -0.0068(15) -0.0075(14)
 O4 0.076(3) 0.0156(17) 0.058(2) -0.0098(16) -0.041(2) 0.0039(17)
 O5 0.048(3) 0.040(3) 0.083(3) -0.047(3) 0.000 0.000
 O6 0.049(3) 0.045(3) 0.087(4) 0.043(3) 0.000 0.000
 O7 0.135(4) 0.031(2) 0.0226(18) -0.0006(15) -0.002(2) 0.045(2)
 O8 0.104(5) 0.039(3) 0.027(3) 0.000 0.028(3) 0.000
 O9 0.040(3) 0.036(3) 0.088(4) 0.000 0.022(3) 0.000
 O10 0.108(5) 0.039(3) 0.018(2) 0.000 -0.021(3) 0.000
 O11 0.045(3) 0.036(3) 0.098(5) 0.000 -0.028(3) 0.000
 C1 0.062(3) 0.017(2) 0.031(2) -0.0023(19) -0.016(2) -0.004(2)
 C2 0.082(3) 0.022(2) 0.036(2) -0.004(2) -0.020(2) -0.010(2)
 C3 0.119(4) 0.027(3) 0.062(3) -0.007(2) -0.043(3) -0.007(3)
 C4 0.125(4) 0.032(3) 0.062(3) -0.001(3) -0.049(3) -0.013(3)
 C5 0.105(4) 0.029(2) 0.036(2) 0.000(2) -0.025(3) -0.019(3)
 C6 0.107(4) 0.029(3) 0.047(3) -0.012(2) -0.031(3) -0.004(3)
 C7 0.098(4) 0.029(2) 0.045(3) -0.009(2) -0.029(3) -0.003(3)
 C8 0.105(4) 0.026(2) 0.032(2) 0.000(2) -0.024(3) -0.019(3)
 C9 0.106(4) 0.031(3) 0.049(3) -0.016(2) -0.027(3) -0.011(3)
 C10 0.105(4) 0.040(3) 0.046(3) -0.014(2) -0.027(3) -0.014(3)
 C11 0.107(4) 0.025(2) 0.023(2) 0.0020(19) -0.010(2) -0.028(3)
 C12 0.153(5) 0.036(3) 0.072(4) -0.007(3) -0.054(4) -0.009(3)
 C13 0.150(5) 0.040(3) 0.073(4) -0.011(3) -0.055(4) -0.004(3)
 C14 0.092(4) 0.027(3) 0.022(3) 0.000 0.000 -0.028(3)
 C15 0.088(4) 0.028(3) 0.022(3) 0.000 0.000 -0.029(3)
 C16 0.086(3) 0.034(3) 0.021(2) -0.0009(19) 0.003(2) -0.029(2)
 C17 0.078(3) 0.060(3) 0.046(3) -0.024(3) -0.002(3) -0.023(3)
 C18 0.075(3) 0.053(3) 0.052(3) -0.022(3) -0.006(3) -0.016(3)
 C19 0.078(3) 0.032(2) 0.032(2) -0.010(2) -0.003(2) -0.019(2)
 C20 0.080(3) 0.050(3) 0.054(3) -0.022(3) 0.000(3) -0.019(3)
 C21 0.090(3) 0.044(3) 0.051(3) -0.022(3) 0.008(3) -0.021(3)
 C22 0.076(3) 0.027(2) 0.036(2) -0.010(2) -0.012(2) -0.015(2)
 C23 0.088(4) 0.038(3) 0.057(3) -0.013(3) -0.036(3) -0.005(3)
 C24 0.081(4) 0.031(3) 0.063(3) -0.017(2) -0.037(3) 0.005(3)
 C25 0.064(3) 0.020(2) 0.037(2) -0.0070(19) -0.016(2) -0.004(2)
 C26 0.070(3) 0.032(3) 0.049(3) -0.015(2) -0.019(3) -0.001(2)
 C27 0.080(3) 0.028(2) 0.055(3) -0.017(2) -0.018(3) -0.002(3)
 C28 0.054(3) 0.020(2) 0.030(2) -0.0024(19) -0.011(2) -0.002(2)

_geom_special_details
;
 All esds (except the esd in the dihedral angle between two l.s. planes)
 are estimated using the full covariance matrix.  The cell esds are taken
 into account individually in the estimation of esds in distances, angles
 and torsion angles; correlations between esds in cell parameters are only
 used when they are defined by crystal symmetry.  An approximate (isotropic)
 treatment of cell esds is used for estimating esds involving l.s. planes.
;
loop_
  _geom_bond_atom_site_label_1
  _geom_bond_atom_site_label_2
  _geom_bond_distance
  _geom_bond_site_symmetry_2
  _geom_bond_publ_flag
 Zr1 Zr2 3.5033(5) 2 ?
 Zr1 Zr2 3.5033(5) . ?
 Zr1 Zr3 3.5050(5) 2 ?
 Zr1 Zr3 3.5050(5) . ?
 Zr1 O1 2.190(3) . ?
 Zr1 O1 2.190(3) 11 ?
 Zr1 O3 2.195(3) 16_464 ?
 Zr1 O3 2.195(3) 6_554 ?
 Zr1 O5 2.168(5) . ?
 Zr1 O6 2.178(6) . ?
 Zr1 O7 2.180(4) . ?
 Zr1 O7 2.180(4) 11 ?
 Zr2 Zr1 3.5033(5) 2 ?
 Zr2 Zr2 3.5323(11) 2 ?
 Zr2 Zr3 3.5449(7) . ?
 Zr2 O4 2.272(3) 6_554 ?
 Zr2 O4 2.272(3) 15_544 ?
 Zr2 O5 2.127(3) . ?
 Zr2 O5 2.127(3) 2 ?
 Zr2 O7 2.131(4) 12_565 ?
 Zr2 O7 2.131(4) . ?
 Zr2 O8 2.182(5) . ?
 Zr2 O9 2.192(5) . ?
 Zr3 Zr1 3.5051(5) 2 ?
 Zr3 Zr3 3.5413(12) 2 ?
 Zr3 O2 2.259(3) . ?
 Zr3 O2 2.259(3) 12_565 ?
 Zr3 O6 2.132(3) 2 ?
 Zr3 O6 2.132(3) . ?
 Zr3 O7 2.139(4) . ?
 Zr3 O7 2.139(4) 12_565 ?
 Zr3 O10 2.233(5) . ?
 Zr3 O11 2.203(6) . ?
 O1 C1 1.267(6) . ?
 O2 C1 1.259(6) . ?
 O3 Zr1 2.195(3) 6_556 ?
 O3 C28 1.268(6) . ?
 O4 Zr2 2.272(3) 6_556 ?
 O4 C28 1.249(6) . ?
 O5 Zr2 2.127(3) 2 ?
 O6 Zr3 2.132(3) 2 ?
 C1 C2 1.492(7) . ?
 C2 C3 1.387(8) . ?
 C2 C7 1.374(8) . ?
 C3 C4 1.367(8) . ?
 C4 C5 1.396(9) . ?
 C5 C6 1.385(8) . ?
 C5 C8 1.497(7) . ?
 C6 C7 1.391(8) . ?
 C8 C9 1.365(9) . ?
 C8 C13 1.369(9) . ?
 C9 C10 1.396(8) . ?
 C10 C11 1.350(9) . ?
 C11 C12 1.362(10) . ?
 C11 C14 1.496(6) . ?
 C12 C13 1.378(9) . ?
 C14 C11 1.496(6) 6 ?
 C14 C15 1.333(10) . ?
 C15 C16 1.512(6) . ?
 C15 C16 1.512(6) 6 ?
 C16 C17 1.385(9) . ?
 C16 C21 1.353(9) . ?
 C17 C18 1.388(8) . ?
 C18 C19 1.366(9) . ?
 C19 C20 1.378(9) . ?
 C19 C22 1.487(7) . ?
 C20 C21 1.397(8) . ?
 C22 C23 1.394(9) . ?
 C22 C27 1.372(8) . ?
 C23 C24 1.374(8) . ?
 C24 C25 1.388(8) . ?
 C25 C26 1.391(8) . ?
 C25 C28 1.490(7) . ?
 C26 C27 1.391(7) . ?

loop_
  _geom_angle_atom_site_label_1
  _geom_angle_atom_site_label_2
  _geom_angle_atom_site_label_3
  _geom_angle
  _geom_angle_site_symmetry_1
  _geom_angle_site_symmetry_3
  _geom_angle_publ_flag
 Zr2 Zr1 Zr2 60.549(18) 2 . ?
 Zr2 Zr1 Zr3 91.206(14) . 2 ?
 Zr2 Zr1 Zr3 91.205(14) 2 . ?
 Zr2 Zr1 Zr3 60.770(13) . . ?
 Zr2 Zr1 Zr3 60.769(13) 2 2 ?
 Zr3 Zr1 Zr3 60.686(19) . 2 ?
 O1 Zr1 Zr2 166.69(8) . 2 ?
 O1 Zr1 Zr2 111.43(9) . . ?
 O1 Zr1 Zr2 166.69(8) 11 . ?
 O1 Zr1 Zr2 111.42(9) 11 2 ?
 O1 Zr1 Zr3 111.00(8) . 2 ?
 O1 Zr1 Zr3 111.00(8) 11 . ?
 O1 Zr1 Zr3 75.48(8) . . ?
 O1 Zr1 Zr3 75.48(8) 11 2 ?
 O1 Zr1 O1 74.15(18) . 11 ?
 O1 Zr1 O3 117.94(12) . 16_464 ?
 O1 Zr1 O3 74.96(12) 11 16_464 ?
 O1 Zr1 O3 117.94(12) 11 6_554 ?
 O1 Zr1 O3 74.96(12) . 6_554 ?
 O3 Zr1 Zr2 75.37(8) 16_464 2 ?
 O3 Zr1 Zr2 110.88(8) 16_464 . ?
 O3 Zr1 Zr2 110.88(8) 6_554 2 ?
 O3 Zr1 Zr2 75.37(8) 6_554 . ?
 O3 Zr1 Zr3 111.26(9) 6_554 . ?
 O3 Zr1 Zr3 166.58(8) 16_464 . ?
 O3 Zr1 Zr3 111.25(9) 16_464 2 ?
 O3 Zr1 Zr3 166.58(8) 6_554 2 ?
 O3 Zr1 O3 74.30(18) 16_464 6_554 ?
 O5 Zr1 Zr2 34.94(9) . . ?
 O5 Zr1 Zr2 34.94(9) . 2 ?
 O5 Zr1 Zr3 90.07(16) . 2 ?
 O5 Zr1 Zr3 90.07(16) . . ?
 O5 Zr1 O1 142.69(9) . 11 ?
 O5 Zr1 O1 142.69(9) . . ?
 O5 Zr1 O3 78.86(17) . 16_464 ?
 O5 Zr1 O3 78.86(17) . 6_554 ?
 O5 Zr1 O6 108.8(3) . . ?
 O5 Zr1 O7 70.10(13) . . ?
 O5 Zr1 O7 70.10(13) . 11 ?
 O6 Zr1 Zr2 90.37(17) . 2 ?
 O6 Zr1 Zr2 90.37(17) . . ?
 O6 Zr1 Zr3 35.17(9) . 2 ?
 O6 Zr1 Zr3 35.17(9) . . ?
 O6 Zr1 O1 78.71(17) . . ?
 O6 Zr1 O1 78.71(17) . 11 ?
 O6 Zr1 O3 142.59(9) . 6_554 ?
 O6 Zr1 O3 142.59(9) . 16_464 ?
 O6 Zr1 O7 70.51(14) . 11 ?
 O6 Zr1 O7 70.51(14) . . ?
 O7 Zr1 Zr2 35.18(10) 11 2 ?
 O7 Zr1 Zr2 35.18(10) . . ?
 O7 Zr1 Zr2 90.29(13) 11 . ?
 O7 Zr1 Zr2 90.28(13) . 2 ?
 O7 Zr1 Zr3 90.49(13) . 2 ?
 O7 Zr1 Zr3 90.49(13) 11 . ?
 O7 Zr1 Zr3 35.36(10) . . ?
 O7 Zr1 Zr3 35.36(10) 11 2 ?
 O7 Zr1 O1 142.38(12) . 11 ?
 O7 Zr1 O1 78.97(15) . . ?
 O7 Zr1 O1 142.38(12) 11 . ?
 O7 Zr1 O1 78.97(15) 11 11 ?
 O7 Zr1 O3 78.68(15) . 6_554 ?
 O7 Zr1 O3 142.06(12) 11 6_554 ?
 O7 Zr1 O3 142.07(12) . 16_464 ?
 O7 Zr1 O3 78.67(15) 11 16_464 ?
 O7 Zr1 O7 109.3(3) 11 . ?
 Zr1 Zr2 Zr1 88.823(17) . 2 ?
 Zr1 Zr2 Zr2 59.726(9) 2 2 ?
 Zr1 Zr2 Zr2 59.725(9) . 2 ?
 Zr1 Zr2 Zr3 59.639(11) . . ?
 Zr1 Zr2 Zr3 59.639(11) 2 . ?
 Zr2 Zr2 Zr3 90.072(13) 2 . ?
 O4 Zr2 Zr1 71.71(9) 15_544 2 ?
 O4 Zr2 Zr1 160.51(9) 15_544 . ?
 O4 Zr2 Zr1 71.71(9) 6_554 . ?
 O4 Zr2 Zr1 160.51(9) 6_554 2 ?
 O4 Zr2 Zr2 107.41(11) 15_544 2 ?
 O4 Zr2 Zr2 107.41(11) 6_554 2 ?
 O4 Zr2 Zr3 108.84(11) 6_554 . ?
 O4 Zr2 Zr3 108.84(11) 15_544 . ?
 O4 Zr2 O4 127.72(18) 15_544 6_554 ?
 O5 Zr2 Zr1 88.14(17) 2 . ?
 O5 Zr2 Zr1 35.72(14) . . ?
 O5 Zr2 Zr1 35.72(14) 2 2 ?
 O5 Zr2 Zr1 88.14(17) . 2 ?
 O5 Zr2 Zr2 33.85(13) . 2 ?
 O5 Zr2 Zr2 33.84(13) 2 2 ?
 O5 Zr2 Zr3 89.67(18) . . ?
 O5 Zr2 Zr3 89.67(18) 2 . ?
 O5 Zr2 O4 75.57(18) 2 15_544 ?
 O5 Zr2 O4 138.65(16) 2 6_554 ?
 O5 Zr2 O4 138.65(16) . 15_544 ?
 O5 Zr2 O4 75.57(18) . 6_554 ?
 O5 Zr2 O5 67.7(3) 2 . ?
 O5 Zr2 O7 108.1(2) 2 . ?
 O5 Zr2 O7 71.81(19) 2 12_565 ?
 O5 Zr2 O7 108.1(2) . 12_565 ?
 O5 Zr2 O7 71.80(19) . . ?
 O5 Zr2 O8 87.2(2) 2 . ?
 O5 Zr2 O8 87.3(2) . . ?
 O5 Zr2 O9 146.14(13) . . ?
 O5 Zr2 O9 146.14(13) 2 . ?
 O7 Zr2 Zr1 88.50(13) 12_565 . ?
 O7 Zr2 Zr1 36.10(13) . . ?
 O7 Zr2 Zr1 88.50(13) . 2 ?
 O7 Zr2 Zr1 36.10(13) 12_565 2 ?
 O7 Zr2 Zr2 90.31(15) 12_565 2 ?
 O7 Zr2 Zr2 90.31(15) . 2 ?
 O7 Zr2 Zr3 33.96(10) . . ?
 O7 Zr2 Zr3 33.96(10) 12_565 . ?
 O7 Zr2 O4 140.17(15) 12_565 6_554 ?
 O7 Zr2 O4 140.17(15) . 15_544 ?
 O7 Zr2 O4 76.41(16) . 6_554 ?
 O7 Zr2 O4 76.41(16) 12_565 15_544 ?
 O7 Zr2 O7 67.9(2) . 12_565 ?
 O7 Zr2 O8 145.89(10) 12_565 . ?
 O7 Zr2 O8 145.89(10) . . ?
 O7 Zr2 O9 89.2(2) . . ?
 O7 Zr2 O9 89.2(2) 12_565 . ?
 O8 Zr2 Zr1 118.15(11) . . ?
 O8 Zr2 Zr1 118.15(11) . 2 ?
 O8 Zr2 Zr2 86.22(18) . 2 ?
 O8 Zr2 Zr3 176.29(18) . . ?
 O8 Zr2 O4 72.37(13) . 6_554 ?
 O8 Zr2 O4 72.37(13) . 15_544 ?
 O8 Zr2 O9 94.4(3) . . ?
 O9 Zr2 Zr1 119.92(11) . . ?
 O9 Zr2 Zr1 119.92(11) . 2 ?
 O9 Zr2 Zr2 179.39(18) . 2 ?
 O9 Zr2 Zr3 89.32(18) . . ?
 O9 Zr2 O4 72.79(13) . 15_544 ?
 O9 Zr2 O4 72.79(13) . 6_554 ?
 Zr1 Zr3 Zr1 88.767(17) . 2 ?
 Zr1 Zr3 Zr2 59.591(11) . . ?
 Zr1 Zr3 Zr2 59.591(11) 2 . ?
 Zr1 Zr3 Zr3 59.657(10) 2 2 ?
 Zr1 Zr3 Zr3 59.657(10) . 2 ?
 Zr3 Zr3 Zr2 89.927(13) 2 . ?
 O2 Zr3 Zr1 160.32(9) . 2 ?
 O2 Zr3 Zr1 160.32(9) 12_565 . ?
 O2 Zr3 Zr1 71.60(9) 12_565 2 ?
 O2 Zr3 Zr1 71.60(9) . . ?
 O2 Zr3 Zr2 109.12(10) 12_565 . ?
 O2 Zr3 Zr2 109.13(10) . . ?
 O2 Zr3 Zr3 106.98(12) 12_565 2 ?
 O2 Zr3 Zr3 106.98(12) . 2 ?
 O2 Zr3 O2 127.96(18) . 12_565 ?
 O6 Zr3 Zr1 88.33(17) 2 . ?
 O6 Zr3 Zr1 36.04(15) . . ?
 O6 Zr3 Zr1 36.04(15) 2 2 ?
 O6 Zr3 Zr1 88.33(17) . 2 ?
 O6 Zr3 Zr2 90.01(18) . . ?
 O6 Zr3 Zr2 90.01(18) 2 . ?
 O6 Zr3 Zr3 33.86(14) . 2 ?
 O6 Zr3 Zr3 33.86(14) 2 2 ?
 O6 Zr3 O2 75.01(19) . . ?
 O6 Zr3 O2 137.98(18) . 12_565 ?
 O6 Zr3 O2 137.98(18) 2 . ?
 O6 Zr3 O2 75.01(19) 2 12_565 ?
 O6 Zr3 O6 67.7(3) 2 . ?
 O6 Zr3 O7 72.2(2) 2 12_565 ?
 O6 Zr3 O7 72.2(2) . . ?
 O6 Zr3 O7 108.3(2) 2 . ?
 O6 Zr3 O7 108.3(2) . 12_565 ?
 O6 Zr3 O10 86.9(2) . . ?
 O6 Zr3 O10 86.9(2) 2 . ?
 O6 Zr3 O11 146.12(13) . . ?
 O6 Zr3 O11 146.12(13) 2 . ?
 O7 Zr3 Zr1 36.14(13) 12_565 2 ?
 O7 Zr3 Zr1 36.14(13) . . ?
 O7 Zr3 Zr1 88.33(13) 12_565 . ?
 O7 Zr3 Zr1 88.33(13) . 2 ?
 O7 Zr3 Zr2 33.81(10) . . ?
 O7 Zr3 Zr2 33.82(10) 12_565 . ?
 O7 Zr3 Zr3 90.19(15) 12_565 2 ?
 O7 Zr3 Zr3 90.19(15) . 2 ?
 O7 Zr3 O2 140.45(15) . 12_565 ?
 O7 Zr3 O2 140.45(15) 12_565 . ?
 O7 Zr3 O2 76.76(15) . . ?
 O7 Zr3 O2 76.75(15) 12_565 12_565 ?
 O7 Zr3 O7 67.6(2) . 12_565 ?
 O7 Zr3 O10 146.04(10) . . ?
 O7 Zr3 O10 146.03(10) 12_565 . ?
 O7 Zr3 O11 88.9(2) . . ?
 O7 Zr3 O11 88.9(2) 12_565 . ?
 O10 Zr3 Zr1 118.19(11) . . ?
 O10 Zr3 Zr1 118.19(11) . 2 ?
 O10 Zr3 Zr2 176.29(18) . . ?
 O10 Zr3 Zr3 86.36(18) . 2 ?
 O10 Zr3 O2 72.06(12) . . ?
 O10 Zr3 O2 72.06(12) . 12_565 ?
 O11 Zr3 Zr1 119.67(11) . 2 ?
 O11 Zr3 Zr1 119.67(11) . . ?
 O11 Zr3 Zr2 88.92(19) . . ?
 O11 Zr3 Zr3 178.85(19) . 2 ?
 O11 Zr3 O2 73.41(13) . 12_565 ?
 O11 Zr3 O2 73.41(13) . . ?
 O11 Zr3 O10 94.8(3) . . ?
 C1 O1 Zr1 131.5(3) . . ?
 C1 O2 Zr3 134.6(3) . . ?
 C28 O3 Zr1 131.8(3) . 6_556 ?
 C28 O4 Zr2 134.3(3) . 6_556 ?
 Zr2 O5 Zr1 109.3(2) 2 . ?
 Zr2 O5 Zr1 109.3(2) . . ?
 Zr2 O5 Zr2 112.3(3) 2 . ?
 Zr3 O6 Zr1 108.8(2) . . ?
 Zr3 O6 Zr1 108.8(2) 2 . ?
 Zr3 O6 Zr3 112.3(3) . 2 ?
 Zr2 O7 Zr1 108.7(2) . . ?
 Zr2 O7 Zr3 112.23(18) . . ?
 Zr3 O7 Zr1 108.5(2) . . ?
 O1 C1 C2 116.6(4) . . ?
 O2 C1 O1 125.3(4) . . ?
 O2 C1 C2 118.1(4) . . ?
 C3 C2 C1 121.2(5) . . ?
 C7 C2 C1 120.3(5) . . ?
 C7 C2 C3 118.4(5) . . ?
 C4 C3 C2 121.5(6) . . ?
 C3 C4 C5 120.7(6) . . ?
 C4 C5 C8 121.4(5) . . ?
 C6 C5 C4 117.7(5) . . ?
 C6 C5 C8 121.0(5) . . ?
 C5 C6 C7 121.2(6) . . ?
 C2 C7 C6 120.4(6) . . ?
 C9 C8 C5 121.6(6) . . ?
 C9 C8 C13 116.8(5) . . ?
 C13 C8 C5 121.6(6) . . ?
 C8 C9 C10 121.6(6) . . ?
 C11 C10 C9 121.2(6) . . ?
 C10 C11 C12 117.0(5) . . ?
 C10 C11 C14 123.1(5) . . ?
 C12 C11 C14 119.8(5) . . ?
 C11 C12 C13 122.4(7) . . ?
 C8 C13 C12 120.7(7) . . ?
 C11 C14 C11 114.2(6) . 6 ?
 C15 C14 C11 122.9(3) . 6 ?
 C15 C14 C11 122.9(3) . . ?
 C14 C15 C16 122.8(3) . . ?
 C14 C15 C16 122.8(3) . 6 ?
 C16 C15 C16 114.5(6) . 6 ?
 C17 C16 C15 119.0(5) . . ?
 C21 C16 C15 122.0(5) . . ?
 C21 C16 C17 119.0(5) . . ?
 C16 C17 C18 119.6(6) . . ?
 C19 C18 C17 122.0(7) . . ?
 C18 C19 C20 117.7(5) . . ?
 C18 C19 C22 120.4(6) . . ?
 C20 C19 C22 121.9(6) . . ?
 C19 C20 C21 120.7(7) . . ?
 C16 C21 C20 120.9(7) . . ?
 C23 C22 C19 120.4(5) . . ?
 C27 C22 C19 121.2(5) . . ?
 C27 C22 C23 118.3(5) . . ?
 C24 C23 C22 121.0(6) . . ?
 C23 C24 C25 120.4(6) . . ?
 C24 C25 C26 119.1(5) . . ?
 C24 C25 C28 120.8(5) . . ?
 C26 C25 C28 120.1(5) . . ?
 C25 C26 C27 119.5(6) . . ?
 C22 C27 C26 121.6(6) . . ?
 O3 C28 C25 116.5(4) . . ?
 O4 C28 O3 125.5(4) . . ?
 O4 C28 C25 118.0(4) . . ?

_shelx_fab_file
;
 0 0 2 -213.35 0.00
 0 0 3 28.09 0.00
 0 0 4 147.44 0.00
 0 0 5 57.09 0.00
 0 0 6 -95.06 0.00
 0 0 7 -97.10 0.00
 0 0 9 60.90 0.00
 0 0 10 -44.33 0.00
 0 0 11 -40.69 0.00
 0 0 12 -6.39 0.00
 0 0 13 9.17 0.00
 0 0 14 -15.43 0.00
 0 0 15 -16.61 0.00
 0 0 16 -4.17 0.00
 0 0 17 6.14 0.00
 0 0 18 -5.31 0.00
 0 0 19 2.94 0.00
 0 0 20 -14.05 0.00
 0 2 2 98.64 0.00
 0 2 3 190.25 0.00
 0 2 4 165.73 0.00
 0 2 5 54.38 0.00
 0 2 6 28.63 0.00
 0 2 7 -7.93 0.00
 0 2 8 -22.55 0.00
 0 2 9 -30.35 0.00
 0 2 10 -2.17 0.00
 0 2 11 -13.68 0.00
 0 2 12 -5.35 0.00
 0 2 13 14.18 0.00
 0 2 14 17.63 0.00
 0 2 15 9.49 0.00
 0 2 16 8.97 0.00
 0 2 17 3.39 0.00
 0 2 18 10.20 0.00
 0 2 19 1.37 0.00
 0 2 20 10.15 0.00
 0 2 21 -13.07 0.00
 0 4 0 363.91 0.00
 0 4 1 114.02 0.00
 0 4 2 401.84 0.00
 0 4 4 -88.85 0.00
 0 4 5 -54.86 0.00
 0 4 6 124.86 0.00
 0 4 7 -10.68 0.00
 0 4 8 -54.89 0.00
 0 4 9 6.08 0.00
 0 4 10 0.57 0.00
 0 4 11 27.42 0.00
 0 4 12 -29.39 0.00
 0 4 13 -33.42 0.00
 0 4 14 -3.55 0.00
 0 4 15 2.56 0.00
 0 4 16 2.13 0.00
 0 4 17 -7.57 0.00
 0 4 18 1.75 0.00
 0 4 19 8.61 0.00
 0 4 20 5.47 0.00
 0 4 21 4.45 0.00
 0 6 0 269.65 0.00
 0 6 1 188.23 0.00
 0 6 2 28.69 0.00
 0 6 3 92.68 0.00
 0 6 4 59.04 0.00
 0 6 5 62.70 0.00
 0 6 6 51.37 0.00
 0 6 7 18.58 0.00
 0 6 8 36.65 0.00
 0 6 9 -41.68 0.00
 0 6 10 -24.67 0.00
 0 6 11 -3.79 0.00
 0 6 12 30.10 0.00
 0 6 13 18.70 0.00
 0 6 14 0.98 0.00
 0 6 15 17.47 0.00
 0 6 16 0.94 0.00
 0 6 17 12.28 0.00
 0 6 18 -11.35 0.00
 0 6 19 -5.11 0.00
 0 6 20 -6.91 0.00
 0 8 0 26.31 0.00
 0 8 1 103.88 0.00
 0 8 2 81.09 0.00
 0 8 3 37.44 0.00
 0 8 4 30.95 0.00
 0 8 5 23.30 0.00
 0 8 6 -53.01 0.00
 0 8 7 29.70 0.00
 0 8 8 12.95 0.00
 0 8 9 31.04 0.00
 0 8 10 -11.17 0.00
 0 8 11 -3.67 0.00
 0 8 12 1.69 0.00
 0 8 13 2.09 0.00
 0 8 14 7.11 0.00
 0 8 15 -16.08 0.00
 0 8 16 16.67 0.00
 0 8 17 7.82 0.00
 0 8 18 10.50 0.00
 0 8 19 5.81 0.00
 0 8 20 11.03 0.00
 0 10 0 118.04 0.00
 0 10 1 32.63 0.00
 0 10 2 246.18 0.00
 0 10 3 68.01 0.00
 0 10 4 -44.07 0.00
 0 10 5 36.71 0.00
 0 10 6 121.31 0.00
 0 10 7 -57.57 0.00
 0 10 8 -39.36 0.00
 0 10 9 -20.40 0.00
 0 10 10 16.58 0.00
 0 10 11 28.67 0.00
 0 10 12 -0.52 0.00
 0 10 13 5.19 0.00
 0 10 14 1.07 0.00
 0 10 15 3.27 0.00
 0 10 16 -5.13 0.00
 0 10 17 -2.78 0.00
 0 10 18 -1.44 0.00
 0 10 19 5.61 0.00
 0 10 20 -4.07 0.00
 0 12 0 -30.38 0.00
 0 12 1 88.89 0.00
 0 12 2 37.89 0.00
 0 12 3 -16.65 0.00
 0 12 4 38.50 0.00
 0 12 5 29.73 0.00
 0 12 6 -32.78 0.00
 0 12 7 13.26 0.00
 0 12 8 -12.45 0.00
 0 12 9 39.24 0.00
 0 12 10 22.70 0.00
 0 12 11 -7.86 0.00
 0 12 12 -2.84 0.00
 0 12 13 15.68 0.00
 0 12 14 13.89 0.00
 0 12 15 14.75 0.00
 0 12 16 -1.64 0.00
 0 12 17 10.79 0.00
 0 12 18 1.81 0.00
 0 12 19 -2.04 0.00
 0 12 20 -2.45 0.00
 0 14 0 96.01 0.00
 0 14 1 32.16 0.00
 0 14 2 25.28 0.00
 0 14 3 -3.02 0.00
 0 14 4 48.58 0.00
 0 14 5 -3.20 0.00
 0 14 6 -25.07 0.00
 0 14 7 5.75 0.00
 0 14 8 30.68 0.00
 0 14 9 12.60 0.00
 0 14 10 -11.73 0.00
 0 14 11 -0.54 0.00
 0 14 12 20.99 0.00
 0 14 13 -0.86 0.00
 0 14 14 2.58 0.00
 0 14 15 -9.45 0.00
 0 14 16 10.27 0.00
 0 14 17 -1.92 0.00
 0 14 18 1.59 0.00
 0 14 19 2.17 0.00
 0 14 20 12.96 0.00
 0 16 0 47.59 0.00
 0 16 1 42.36 0.00
 0 16 2 3.22 0.00
 0 16 3 1.79 0.00
 0 16 4 76.00 0.00
 0 16 5 35.51 0.00
 0 16 6 -4.31 0.00
 0 16 7 -1.90 0.00
 0 16 8 1.79 0.00
 0 16 9 7.69 0.00
 0 16 10 7.12 0.00
 0 16 11 35.62 0.00
 0 16 12 19.12 0.00
 0 16 13 20.10 0.00
 0 16 14 -12.11 0.00
 0 16 15 9.07 0.00
 0 16 16 -5.24 0.00
 0 16 17 8.37 0.00
 0 16 18 -6.71 0.00
 0 16 19 -1.17 0.00
 0 16 20 -3.61 0.00
 0 18 0 -60.05 0.00
 0 18 1 10.91 0.00
 0 18 2 22.15 0.00
 0 18 3 -3.76 0.00
 0 18 4 -4.89 0.00
 0 18 5 -24.78 0.00
 0 18 6 14.25 0.00
 0 18 7 35.29 0.00
 0 18 8 2.82 0.00
 0 18 9 21.93 0.00
 0 18 10 10.65 0.00
 0 18 11 5.86 0.00
 0 18 12 11.89 0.00
 0 18 13 4.65 0.00
 0 18 14 14.53 0.00
 0 18 15 3.72 0.00
 0 18 16 7.13 0.00
 0 18 17 -0.74 0.00
 0 18 18 6.63 0.00
 0 18 19 -2.22 0.00
 0 20 0 2.93 0.00
 0 20 1 -2.09 0.00
 0 20 2 -9.50 0.00
 0 20 3 20.58 0.00
 0 20 4 4.96 0.00
 0 20 5 -2.61 0.00
 0 20 6 25.27 0.00
 0 20 7 40.85 0.00
 0 20 8 43.76 0.00
 0 20 9 -6.98 0.00
 0 20 10 18.45 0.00
 0 20 11 24.64 0.00
 0 20 12 -7.36 0.00
 0 20 13 2.97 0.00
 0 20 14 0.02 0.00
 0 20 15 -1.73 0.00
 0 20 16 -2.28 0.00
 0 20 17 3.94 0.00
 0 20 18 -4.57 0.00
 0 20 19 2.41 0.00
 0 22 0 2.23 0.00
 0 22 1 0.49 0.00
 0 22 2 -0.86 0.00
 0 22 3 0.91 0.00
 0 22 4 33.76 0.00
 0 22 5 -9.76 0.00
 0 22 6 1.85 0.00
 0 22 7 25.72 0.00
 0 22 8 6.20 0.00
 0 22 9 20.11 0.00
 0 22 10 16.47 0.00
 0 22 11 18.64 0.00
 0 22 12 -0.02 0.00
 0 22 13 14.04 0.00
 0 22 14 9.10 0.00
 0 22 15 8.50 0.00
 0 22 16 2.91 0.00
 0 22 17 -1.26 0.00
 0 22 18 -1.33 0.00
 0 24 0 -31.61 0.00
 0 24 1 -6.37 0.00
 0 24 2 -14.34 0.00
 0 24 3 8.96 0.00
 0 24 4 -31.19 0.00
 0 24 5 -1.02 0.00
 0 24 6 1.41 0.00
 0 24 7 23.47 0.00
 0 24 8 32.40 0.00
 0 24 9 33.76 0.00
 0 24 10 17.64 0.00
 0 24 11 1.94 0.00
 0 24 12 -1.65 0.00
 0 24 13 4.51 0.00
 0 24 14 10.75 0.00
 0 24 15 0.30 0.00
 0 24 16 0.90 0.00
 0 24 17 -0.08 0.00
 0 24 18 12.81 0.00
 0 26 0 29.57 0.00
 0 26 1 -2.44 0.00
 0 26 2 11.50 0.00
 0 26 3 -1.51 0.00
 0 26 4 6.66 0.00
 0 26 5 15.77 0.00
 0 26 6 39.41 0.00
 0 26 7 -1.86 0.00
 0 26 8 3.40 0.00
 0 26 9 16.78 0.00
 0 26 10 7.67 0.00
 0 26 11 11.51 0.00
 0 26 12 5.84 0.00
 0 26 13 9.33 0.00
 0 26 14 0.00 0.00
 0 26 15 -8.16 0.00
 0 26 16 0.27 0.00
 0 26 17 -2.85 0.00
 0 26 18 0.06 0.00
 0 28 0 -7.05 0.00
 0 28 1 2.81 0.00
 0 28 2 -9.32 0.00
 0 28 3 -1.86 0.00
 0 28 4 -3.62 0.00
 0 28 5 12.50 0.00
 0 28 6 -0.40 0.00
 0 28 7 4.84 0.00
 0 28 8 24.34 0.00
 0 28 9 30.56 0.00
 0 28 10 9.74 0.00
 0 28 11 9.24 0.00
 0 28 12 5.63 0.00
 0 28 13 12.21 0.00
 0 28 14 5.72 0.00
 0 28 15 4.35 0.00
 0 28 16 1.63 0.00
 0 28 17 4.91 0.00
 0 30 0 3.31 0.00
 0 30 1 3.72 0.00
 0 30 2 0.35 0.00
 0 30 3 0.12 0.00
 0 30 4 -5.79 0.00
 0 30 5 3.54 0.00
 0 30 6 5.79 0.00
 0 30 7 15.09 0.00
 0 30 8 17.21 0.00
 0 30 9 5.34 0.00
 0 30 10 12.25 0.00
 0 30 11 7.42 0.00
 0 30 12 6.25 0.00
 0 30 13 -2.15 0.00
 0 30 14 5.12 0.00
 0 30 15 3.17 0.00
 0 30 16 2.74 0.00
 0 32 0 3.49 0.00
 0 32 1 3.69 0.00
 0 32 2 13.34 0.00
 0 32 3 5.02 0.00
 0 32 4 9.39 0.00
 0 32 5 5.95 0.00
 0 32 6 12.63 0.00
 0 32 7 7.58 0.00
 0 32 8 12.42 0.00
 0 32 9 7.54 0.00
 0 32 10 0.77 0.00
 0 32 11 17.67 0.00
 0 32 12 13.06 0.00
 0 32 13 -3.01 0.00
 0 32 14 2.38 0.00
 0 32 15 -1.28 0.00
 0 32 16 -6.70 0.00
 0 34 0 -15.42 0.00
 0 34 1 -7.97 0.00
 0 34 2 -18.10 0.00
 0 34 3 2.87 0.00
 0 34 4 0.94 0.00
 0 34 5 8.37 0.00
 0 34 6 -8.40 0.00
 0 34 7 13.37 0.00
 0 34 8 13.63 0.00
 0 34 9 14.32 0.00
 0 34 10 21.07 0.00
 0 34 11 13.91 0.00
 0 34 12 -2.42 0.00
 0 34 13 13.80 0.00
 0 34 14 -2.25 0.00
 0 34 15 16.34 0.00
 0 36 0 26.96 0.00
 0 36 1 4.85 0.00
 0 36 2 15.66 0.00
 0 36 3 -3.67 0.00
 0 36 4 -3.98 0.00
 0 36 5 1.78 0.00
 0 36 6 7.04 0.00
 0 36 7 7.16 0.00
 0 36 8 11.42 0.00
 0 36 9 -7.31 0.00
 0 36 10 -11.52 0.00
 0 36 11 9.61 0.00
 0 36 13 -4.00 0.00
 0 36 14 7.77 0.00
 0 38 0 -13.62 0.00
 0 38 1 2.55 0.00
 0 38 2 -4.82 0.00
 0 38 3 2.39 0.00
 0 38 4 4.04 0.00
 0 38 5 1.69 0.00
 0 38 6 -4.53 0.00
 0 38 7 5.93 0.00
 0 38 8 5.62 0.00
 0 38 9 13.05 0.00
 0 38 10 11.47 0.00
 0 38 11 12.78 0.00
 0 38 12 1.90 0.00
 0 40 0 6.12 0.00
 0 40 1 8.54 0.00
 0 40 2 -0.96 0.00
 0 40 3 0.75 0.00
 0 40 4 10.94 0.00
 0 40 5 3.96 0.00
 0 40 6 -3.43 0.00
 0 40 7 -3.95 0.00
 0 40 8 9.94 0.00
 0 40 9 8.49 0.00
 0 40 10 1.91 0.00
 0 42 0 5.72 0.00
 0 42 1 -1.51 0.00
 0 42 2 7.35 0.00
 0 42 3 4.11 0.00
 0 42 4 -2.87 0.00
 0 42 5 -0.59 0.00
 0 42 6 10.46 0.00
 0 42 7 8.36 0.00
 0 42 8 5.04 0.00
 0 42 9 -2.90 0.00
 0 44 0 -5.51 0.00
 0 44 1 6.79 0.00
 0 44 2 4.68 0.00
 0 44 3 5.04 0.00
 0 44 4 -4.63 0.00
 0 44 5 -1.97 0.00
 0 44 6 1.24 0.00
 0 44 7 2.77 0.00
 0 44 8 -4.17 0.00
 0 46 0 11.81 0.00
 0 46 1 2.76 0.00
 0 46 2 4.71 0.00
 0 46 3 0.06 0.00
 0 46 4 5.29 0.00
 0 46 5 1.69 0.00
 0 46 6 8.86 0.00
 1 1 1 366.04 0.00
 1 1 2 -60.25 0.00
 1 1 3 218.84 0.00
 1 1 4 20.92 0.00
 1 1 5 -13.77 0.00
 1 1 6 -40.85 0.00
 1 1 7 11.52 0.00
 1 1 8 16.25 0.00
 1 1 9 -5.45 0.00
 1 1 10 24.56 0.00
 1 1 11 -5.35 0.00
 1 1 12 28.79 0.00
 1 1 13 -0.70 0.00
 1 1 14 9.73 0.00
 1 1 15 -7.43 0.00
 1 1 16 10.24 0.00
 1 1 17 -4.04 0.00
 1 1 18 2.50 0.00
 1 1 19 -7.19 0.00
 1 1 20 1.55 0.00
 1 1 21 -11.53 0.00
 1 3 1 -155.46 0.00
 1 3 2 -111.75 0.00
 1 3 3 -20.52 0.00
 1 3 4 21.92 0.00
 1 3 5 -63.50 0.00
 1 3 6 -45.12 0.00
 1 3 7 -0.01 0.00
 1 3 8 64.23 0.00
 1 3 9 -23.05 0.00
 1 3 10 -43.26 0.00
 1 3 11 -0.89 0.00
 1 3 12 -15.95 0.00
 1 3 13 2.62 0.00
 1 3 14 -11.00 0.00
 1 3 15 4.06 0.00
 1 3 16 -2.48 0.00
 1 3 17 8.78 0.00
 1 3 18 2.75 0.00
 1 3 19 2.11 0.00
 1 3 20 4.60 0.00
 1 3 21 7.90 0.00
 1 5 1 -193.51 0.00
 1 5 2 -65.35 0.00
 1 5 3 29.99 0.00
 1 5 4 3.69 0.00
 1 5 5 -9.04 0.00
 1 5 6 -40.49 0.00
 1 5 7 36.92 0.00
 1 5 8 -54.29 0.00
 1 5 9 -20.52 0.00
 1 5 10 5.43 0.00
 1 5 11 15.04 0.00
 1 5 12 9.31 0.00
 1 5 13 -9.82 0.00
 1 5 14 3.87 0.00
 1 5 15 -2.65 0.00
 1 5 16 -8.77 0.00
 1 5 17 -11.86 0.00
 1 5 18 -2.07 0.00
 1 5 19 -2.54 0.00
 1 5 20 2.16 0.00
 1 5 21 -3.44 0.00
 1 7 1 -65.34 0.00
 1 7 2 49.02 0.00
 1 7 3 -95.72 0.00
 1 7 4 -19.33 0.00
 1 7 5 -57.91 0.00
 1 7 6 45.96 0.00
 1 7 7 -27.00 0.00
 1 7 8 20.02 0.00
 1 7 9 2.07 0.00
 1 7 10 16.48 0.00
 1 7 11 -4.51 0.00
 1 7 12 -12.69 0.00
 1 7 13 4.27 0.00
 1 7 14 10.39 0.00
 1 7 15 19.77 0.00
 1 7 16 16.12 0.00
 1 7 17 1.42 0.00
 1 7 18 11.06 0.00
 1 7 19 2.51 0.00
 1 7 20 4.44 0.00
 1 9 1 -28.76 0.00
 1 9 2 62.34 0.00
 1 9 3 -139.49 0.00
 1 9 4 -128.68 0.00
 1 9 5 6.41 0.00
 1 9 6 -37.42 0.00
 1 9 7 -60.98 0.00
 1 9 8 -35.44 0.00
 1 9 9 -10.11 0.00
 1 9 10 -3.70 0.00
 1 9 11 -0.99 0.00
 1 9 12 -10.53 0.00
 1 9 13 -0.39 0.00
 1 9 14 -7.57 0.00
 1 9 15 6.97 0.00
 1 9 16 -12.41 0.00
 1 9 17 4.37 0.00
 1 9 18 -5.40 0.00
 1 9 19 6.23 0.00
 1 9 20 2.51 0.00
 1 11 1 -17.36 0.00
 1 11 2 -6.62 0.00
 1 11 3 -77.51 0.00
 1 11 4 -16.66 0.00
 1 11 5 2.12 0.00
 1 11 6 45.64 0.00
 1 11 7 -16.85 0.00
 1 11 8 -21.88 0.00
 1 11 9 -6.27 0.00
 1 11 10 -0.93 0.00
 1 11 11 -8.47 0.00
 1 11 12 15.13 0.00
 1 11 13 0.88 0.00
 1 11 14 20.08 0.00
 1 11 15 -1.08 0.00
 1 11 16 12.97 0.00
 1 11 17 -2.68 0.00
 1 11 18 -0.19 0.00
 1 11 19 -2.89 0.00
 1 11 20 -3.10 0.00
 1 13 1 4.25 0.00
 1 13 2 11.40 0.00
 1 13 3 -82.43 0.00
 1 13 4 -52.52 0.00
 1 13 5 -15.27 0.00
 1 13 6 -31.21 0.00
 1 13 7 -37.47 0.00
 1 13 8 -7.15 0.00
 1 13 9 -2.62 0.00
 1 13 10 -8.83 0.00
 1 13 11 -2.10 0.00
 1 13 12 -5.54 0.00
 1 13 13 3.78 0.00
 1 13 14 -1.58 0.00
 1 13 15 1.39 0.00
 1 13 16 9.40 0.00
 1 13 17 8.89 0.00
 1 13 18 -1.34 0.00
 1 13 19 2.98 0.00
 1 13 20 -6.33 0.00
 1 15 1 14.67 0.00
 1 15 2 -16.21 0.00
 1 15 3 -39.30 0.00
 1 15 4 -29.01 0.00
 1 15 5 -31.83 0.00
 1 15 6 -54.81 0.00
 1 15 7 -17.40 0.00
 1 15 8 -0.66 0.00
 1 15 9 4.20 0.00
 1 15 10 -10.28 0.00
 1 15 11 -8.95 0.00
 1 15 12 2.12 0.00
 1 15 13 4.67 0.00
 1 15 14 -6.56 0.00
 1 15 15 -7.56 0.00
 1 15 16 -3.73 0.00
 1 15 17 3.28 0.00
 1 15 18 -8.05 0.00
 1 15 19 -1.22 0.00
 1 15 20 -5.09 0.00
 1 17 1 -25.26 0.00
 1 17 2 -27.78 0.00
 1 17 3 -27.74 0.00
 1 17 4 14.26 0.00
 1 17 5 -22.62 0.00
 1 17 6 -12.56 0.00
 1 17 7 -18.14 0.00
 1 17 8 10.60 0.00
 1 17 9 -6.14 0.00
 1 17 10 -2.04 0.00
 1 17 11 -8.72 0.00
 1 17 12 10.87 0.00
 1 17 13 7.96 0.00
 1 17 14 11.07 0.00
 1 17 15 2.92 0.00
 1 17 16 13.84 0.00
 1 17 17 -0.05 0.00
 1 17 18 3.84 0.00
 1 17 19 -0.15 0.00
 1 19 1 -27.96 0.00
 1 19 2 -24.23 0.00
 1 19 3 8.46 0.00
 1 19 4 2.00 0.00
 1 19 5 -53.36 0.00
 1 19 6 -49.87 0.00
 1 19 7 -0.18 0.00
 1 19 8 -11.11 0.00
 1 19 9 -11.65 0.00
 1 19 10 -9.28 0.00
 1 19 11 -3.86 0.00
 1 19 12 -8.57 0.00
 1 19 13 0.25 0.00
 1 19 14 -7.68 0.00
 1 19 15 9.09 0.00
 1 19 16 -1.78 0.00
 1 19 17 4.15 0.00
 1 19 18 -1.32 0.00
 1 19 19 2.66 0.00
 1 21 1 -0.21 0.00
 1 21 2 -14.35 0.00
 1 21 3 -10.68 0.00
 1 21 4 -3.43 0.00
 1 21 5 -34.43 0.00
 1 21 6 1.38 0.00
 1 21 7 -13.93 0.00
 1 21 8 -10.95 0.00
 1 21 9 -3.11 0.00
 1 21 10 4.24 0.00
 1 21 11 6.68 0.00
 1 21 12 2.42 0.00
 1 21 13 -4.33 0.00
 1 21 14 5.53 0.00
 1 21 15 4.87 0.00
 1 21 16 -0.82 0.00
 1 21 17 -0.40 0.00
 1 21 18 1.18 0.00
 1 21 19 -5.15 0.00
 1 23 1 1.59 0.00
 1 23 2 0.22 0.00
 1 23 3 -2.70 0.00
 1 23 4 -4.26 0.00
 1 23 5 -8.41 0.00
 1 23 6 5.26 0.00
 1 23 7 -9.47 0.00
 1 23 8 -13.06 0.00
 1 23 9 -13.52 0.00
 1 23 10 1.85 0.00
 1 23 11 -2.88 0.00
 1 23 12 0.74 0.00
 1 23 13 -1.37 0.00
 1 23 14 10.07 0.00
 1 23 15 5.45 0.00
 1 23 16 5.65 0.00
 1 23 17 -0.74 0.00
 1 23 18 4.39 0.00
 1 25 1 7.79 0.00
 1 25 2 -1.28 0.00
 1 25 3 5.39 0.00
 1 25 4 -17.62 0.00
 1 25 5 -12.47 0.00
 1 25 6 -10.45 0.00
 1 25 7 -14.57 0.00
 1 25 8 -12.43 0.00
 1 25 9 -3.94 0.00
 1 25 10 -10.27 0.00
 1 25 11 2.62 0.00
 1 25 12 -7.20 0.00
 1 25 13 4.01 0.00
 1 25 14 -6.85 0.00
 1 25 15 4.93 0.00
 1 25 16 -4.64 0.00
 1 25 17 4.07 0.00
 1 25 18 -5.00 0.00
 1 27 1 1.85 0.00
 1 27 2 -10.14 0.00
 1 27 3 0.52 0.00
 1 27 4 -2.86 0.00
 1 27 5 1.60 0.00
 1 27 6 8.27 0.00
 1 27 7 -3.01 0.00
 1 27 8 -3.21 0.00
 1 27 9 -10.67 0.00
 1 27 10 4.58 0.00
 1 27 11 -9.50 0.00
 1 27 12 9.36 0.00
 1 27 13 -4.52 0.00
 1 27 14 6.46 0.00
 1 27 15 -2.57 0.00
 1 27 16 -0.26 0.00
 1 27 17 -8.48 0.00
 1 29 1 -4.82 0.00
 1 29 2 -5.82 0.00
 1 29 3 2.68 0.00
 1 29 4 -1.75 0.00
 1 29 5 -2.25 0.00
 1 29 6 1.92 0.00
 1 29 7 -8.86 0.00
 1 29 8 -3.01 0.00
 1 29 9 3.22 0.00
 1 29 10 -11.80 0.00
 1 29 11 -3.90 0.00
 1 29 12 0.35 0.00
 1 29 13 2.09 0.00
 1 29 14 -0.99 0.00
 1 29 15 4.71 0.00
 1 29 16 1.56 0.00
 1 29 17 4.74 0.00
 1 31 1 2.18 0.00
 1 31 2 0.62 0.00
 1 31 3 2.89 0.00
 1 31 4 -8.81 0.00
 1 31 5 -3.07 0.00
 1 31 6 -5.50 0.00
 1 31 7 -3.41 0.00
 1 31 8 1.07 0.00
 1 31 9 -2.34 0.00
 1 31 10 -6.96 0.00
 1 31 11 -0.45 0.00
 1 31 12 -3.33 0.00
 1 31 13 -9.22 0.00
 1 31 14 -9.45 0.00
 1 31 15 -2.98 0.00
 1 31 16 -11.55 0.00
 1 33 1 -3.64 0.00
 1 33 2 11.81 0.00
 1 33 3 3.74 0.00
 1 33 4 11.15 0.00
 1 33 5 9.79 0.00
 1 33 6 10.84 0.00
 1 33 7 -3.12 0.00
 1 33 8 5.95 0.00
 1 33 9 2.55 0.00
 1 33 10 8.13 0.00
 1 33 11 -18.01 0.00
 1 33 12 4.61 0.00
 1 33 13 -9.48 0.00
 1 33 14 3.50 0.00
 1 33 15 -1.01 0.00
 1 35 1 -8.22 0.00
 1 35 2 -8.18 0.00
 1 35 3 -12.00 0.00
 1 35 4 -0.85 0.00
 1 35 5 6.31 0.00
 1 35 6 -2.39 0.00
 1 35 7 6.11 0.00
 1 35 8 -6.41 0.00
 1 35 9 -1.50 0.00
 1 35 10 -8.11 0.00
 1 35 11 14.69 0.00
 1 35 12 -9.27 0.00
 1 35 13 1.59 0.00
 1 35 14 2.62 0.00
 1 37 1 9.33 0.00
 1 37 2 1.47 0.00
 1 37 3 9.87 0.00
 1 37 4 5.26 0.00
 1 37 5 8.69 0.00
 1 37 6 6.86 0.00
 1 37 7 -1.59 0.00
 1 37 8 8.75 0.00
 1 37 9 2.83 0.00
 1 37 10 11.91 0.00
 1 37 11 -19.90 0.00
 1 37 12 2.61 0.00
 1 37 13 -8.51 0.00
 1 39 1 2.94 0.00
 1 39 2 6.34 0.00
 1 39 3 0.00 0.00
 1 39 4 1.72 0.00
 1 39 5 6.27 0.00
 1 39 6 -0.55 0.00
 1 39 7 5.49 0.00
 1 39 8 -3.50 0.00
 1 39 9 -4.24 0.00
 1 39 10 -1.42 0.00
 1 39 11 8.54 0.00
 1 39 12 -3.11 0.00
 1 41 1 -4.64 0.00
 1 41 2 0.93 0.00
 1 41 3 1.38 0.00
 1 41 4 4.17 0.00
 1 41 5 4.59 0.00
 1 41 6 -1.23 0.00
 1 41 7 6.84 0.00
 1 41 8 4.36 0.00
 1 41 9 -2.53 0.00
 1 41 10 2.55 0.00
 1 43 1 -0.16 0.00
 1 43 2 -1.31 0.00
 1 43 3 -0.55 0.00
 1 43 4 6.28 0.00
 1 43 5 1.49 0.00
 1 43 6 0.61 0.00
 1 43 7 3.95 0.00
 1 43 8 11.28 0.00
 1 43 9 0.23 0.00
 1 45 1 0.58 0.00
 1 45 2 2.43 0.00
 1 45 3 -1.59 0.00
 1 45 4 -1.89 0.00
 1 45 5 1.67 0.00
 1 45 6 -5.64 0.00
 1 45 7 0.64 0.00
 1 45 8 0.03 0.00
 1 47 1 -8.05 0.00
 1 47 2 5.52 0.00
 1 47 3 -1.71 0.00
 1 47 4 0.40 0.00
 1 47 5 3.13 0.00
 1 47 6 7.87 0.00
 2 0 0 492.46 0.00
 2 0 1 -115.89 0.00
 2 0 2 230.44 0.00
 2 0 3 0.08 0.00
 2 0 4 -112.54 0.00
 2 0 5 -54.51 0.00
 2 0 6 77.35 0.00
 2 0 7 11.47 0.00
 2 0 8 -21.13 0.00
 2 0 9 17.52 0.00
 2 0 10 21.36 0.00
 2 0 11 -10.71 0.00
 2 0 12 -17.36 0.00
 2 0 13 -5.87 0.00
 2 0 14 1.99 0.00
 2 0 15 4.23 0.00
 2 0 16 -12.89 0.00
 2 0 17 -13.59 0.00
 2 0 18 -2.87 0.00
 2 0 19 -0.41 0.00
 2 0 20 -0.42 0.00
 2 2 0 515.23 0.00
 2 2 1 -78.82 0.00
 2 2 2 -163.34 0.00
 2 2 3 26.11 0.00
 2 2 4 -5.66 0.00
 2 2 5 6.86 0.00
 2 2 6 -22.96 0.00
 2 2 7 -19.38 0.00
 2 2 8 4.88 0.00
 2 2 9 2.38 0.00
 2 2 10 -5.24 0.00
 2 2 11 4.02 0.00
 2 2 12 -2.26 0.00
 2 2 13 -0.01 0.00
 2 2 14 -0.61 0.00
 2 2 15 -1.88 0.00
 2 2 16 6.73 0.00
 2 2 17 2.88 0.00
 2 2 18 4.01 0.00
 2 2 19 5.04 0.00
 2 2 20 1.69 0.00
 2 2 21 -1.72 0.00
 2 4 0 105.70 0.00
 2 4 1 -9.27 0.00
 2 4 2 -112.10 0.00
 2 4 3 -11.89 0.00
 2 4 4 165.62 0.00
 2 4 5 -4.21 0.00
 2 4 6 -9.82 0.00
 2 4 7 -40.91 0.00
 2 4 8 20.66 0.00
 2 4 9 50.07 0.00
 2 4 10 -17.67 0.00
 2 4 11 3.57 0.00
 2 4 12 7.79 0.00
 2 4 13 1.16 0.00
 2 4 14 -11.86 0.00
 2 4 15 -13.34 0.00
 2 4 16 -4.03 0.00
 2 4 17 2.36 0.00
 2 4 18 3.74 0.00
 2 4 19 -3.11 0.00
 2 4 20 4.40 0.00
 2 4 21 1.84 0.00
 2 6 0 61.17 0.00
 2 6 1 29.56 0.00
 2 6 2 86.17 0.00
 2 6 3 -35.13 0.00
 2 6 4 -126.82 0.00
 2 6 5 8.20 0.00
 2 6 6 84.40 0.00
 2 6 7 30.97 0.00
 2 6 8 33.16 0.00
 2 6 9 -26.10 0.00
 2 6 10 15.01 0.00
 2 6 11 -0.48 0.00
 2 6 12 -3.57 0.00
 2 6 13 -7.70 0.00
 2 6 14 -0.15 0.00
 2 6 15 6.59 0.00
 2 6 16 -6.52 0.00
 2 6 17 0.20 0.00
 2 6 18 -9.03 0.00
 2 6 19 2.67 0.00
 2 6 20 -4.93 0.00
 2 8 0 -139.73 0.00
 2 8 1 -43.96 0.00
 2 8 2 34.03 0.00
 2 8 3 -11.26 0.00
 2 8 4 -124.47 0.00
 2 8 5 22.33 0.00
 2 8 6 24.71 0.00
 2 8 7 27.67 0.00
 2 8 8 -38.02 0.00
 2 8 9 12.03 0.00
 2 8 10 4.05 0.00
 2 8 11 28.96 0.00
 2 8 12 -6.56 0.00
 2 8 13 -15.24 0.00
 2 8 14 5.21 0.00
 2 8 15 -3.66 0.00
 2 8 16 10.09 0.00
 2 8 17 1.47 0.00
 2 8 18 9.90 0.00
 2 8 19 8.30 0.00
 2 8 20 7.79 0.00
 2 10 0 3.09 0.00
 2 10 1 -30.73 0.00
 2 10 2 57.46 0.00
 2 10 3 18.81 0.00
 2 10 4 100.35 0.00
 2 10 5 -33.99 0.00
 2 10 6 -14.52 0.00
 2 10 7 -36.95 0.00
 2 10 8 34.94 0.00
 2 10 9 8.83 0.00
 2 10 10 -0.64 0.00
 2 10 11 -17.47 0.00
 2 10 12 -3.55 0.00
 2 10 13 9.23 0.00
 2 10 14 -12.85 0.00
 2 10 15 -13.74 0.00
 2 10 16 -12.42 0.00
 2 10 17 0.47 0.00
 2 10 18 -4.11 0.00
 2 10 19 -5.08 0.00
 2 10 20 1.69 0.00
 2 12 0 16.35 0.00
 2 12 1 2.50 0.00
 2 12 2 -5.28 0.00
 2 12 3 -42.85 0.00
 2 12 4 -58.23 0.00
 2 12 5 26.63 0.00
 2 12 6 -3.33 0.00
 2 12 7 16.29 0.00
 2 12 8 4.57 0.00
 2 12 9 9.49 0.00
 2 12 10 -14.45 0.00
 2 12 11 -3.90 0.00
 2 12 12 0.19 0.00
 2 12 13 0.62 0.00
 2 12 14 -1.61 0.00
 2 12 15 -2.13 0.00
 2 12 16 7.51 0.00
 2 12 17 8.67 0.00
 2 12 18 -0.66 0.00
 2 12 19 10.79 0.00
 2 12 20 3.35 0.00
 2 14 0 -13.93 0.00
 2 14 1 12.82 0.00
 2 14 2 8.74 0.00
 2 14 3 -40.02 0.00
 2 14 4 10.87 0.00
 2 14 5 8.31 0.00
 2 14 6 14.91 0.00
 2 14 7 -17.71 0.00
 2 14 8 -43.51 0.00
 2 14 9 5.67 0.00
 2 14 10 12.16 0.00
 2 14 11 -1.38 0.00
 2 14 12 -4.69 0.00
 2 14 13 -15.77 0.00
 2 14 14 -8.71 0.00
 2 14 15 -6.80 0.00
 2 14 16 -1.79 0.00
 2 14 17 2.41 0.00
 2 14 18 7.34 0.00
 2 14 19 1.05 0.00
 2 14 20 7.48 0.00
 2 16 0 -2.09 0.00
 2 16 1 14.52 0.00
 2 16 2 29.92 0.00
 2 16 3 -3.41 0.00
 2 16 4 59.17 0.00
 2 16 5 -2.33 0.00
 2 16 6 -16.02 0.00
 2 16 7 5.86 0.00
 2 16 8 10.66 0.00
 2 16 9 3.33 0.00
 2 16 10 -7.02 0.00
 2 16 11 4.53 0.00
 2 16 12 -1.30 0.00
 2 16 13 3.25 0.00
 2 16 14 -5.33 0.00
 2 16 15 8.20 0.00
 2 16 16 -9.81 0.00
 2 16 17 -3.38 0.00
 2 16 18 -2.14 0.00
 2 16 19 1.09 0.00
 2 18 0 4.36 0.00
 2 18 1 -2.01 0.00
 2 18 2 -52.91 0.00
 2 18 3 4.50 0.00
 2 18 4 -4.60 0.00
 2 18 5 -11.92 0.00
 2 18 6 -16.89 0.00
 2 18 7 24.36 0.00
 2 18 8 12.81 0.00
 2 18 9 -13.54 0.00
 2 18 10 -13.80 0.00
 2 18 11 7.32 0.00
 2 18 12 -4.80 0.00
 2 18 13 -10.48 0.00
 2 18 14 -0.04 0.00
 2 18 15 0.56 0.00
 2 18 16 12.22 0.00
 2 18 17 4.68 0.00
 2 18 18 3.18 0.00
 2 18 19 1.59 0.00
 2 20 0 -14.92 0.00
 2 20 1 0.25 0.00
 2 20 2 16.48 0.00
 2 20 3 -6.67 0.00
 2 20 4 30.31 0.00
 2 20 5 -14.26 0.00
 2 20 6 14.04 0.00
 2 20 7 4.24 0.00
 2 20 8 -1.33 0.00
 2 20 9 4.12 0.00
 2 20 10 1.72 0.00
 2 20 11 -2.87 0.00
 2 20 12 -8.04 0.00
 2 20 13 0.23 0.00
 2 20 14 -2.66 0.00
 2 20 15 1.46 0.00
 2 20 16 -1.87 0.00
 2 20 17 1.93 0.00
 2 20 18 -2.17 0.00
 2 20 19 3.78 0.00
 2 22 0 -27.14 0.00
 2 22 1 0.04 0.00
 2 22 2 6.55 0.00
 2 22 3 13.35 0.00
 2 22 4 -29.60 0.00
 2 22 5 -10.43 0.00
 2 22 6 8.00 0.00
 2 22 7 19.43 0.00
 2 22 8 12.29 0.00
 2 22 9 5.57 0.00
 2 22 10 0.38 0.00
 2 22 11 -2.48 0.00
 2 22 12 -5.06 0.00
 2 22 13 8.81 0.00
 2 22 14 2.32 0.00
 2 22 15 -2.84 0.00
 2 22 16 -3.17 0.00
 2 22 17 2.88 0.00
 2 22 18 5.51 0.00
 2 24 0 5.88 0.00
 2 24 1 -5.29 0.00
 2 24 2 -21.70 0.00
 2 24 3 -7.95 0.00
 2 24 4 -11.62 0.00
 2 24 5 -9.05 0.00
 2 24 6 0.04 0.00
 2 24 7 3.32 0.00
 2 24 8 -8.38 0.00
 2 24 9 0.04 0.00
 2 24 10 -6.14 0.00
 2 24 11 -1.16 0.00
 2 24 12 1.19 0.00
 2 24 13 2.51 0.00
 2 24 14 2.45 0.00
 2 24 15 1.52 0.00
 2 24 16 9.13 0.00
 2 24 17 3.51 0.00
 2 24 18 9.18 0.00
 2 26 0 0.42 0.00
 2 26 1 -7.90 0.00
 2 26 2 8.09 0.00
 2 26 3 4.03 0.00
 2 26 4 10.79 0.00
 2 26 5 -4.43 0.00
 2 26 6 -2.32 0.00
 2 26 7 -4.78 0.00
 2 26 8 7.25 0.00
 2 26 9 18.87 0.00
 2 26 10 4.63 0.00
 2 26 11 -2.07 0.00
 2 26 12 -9.68 0.00
 2 26 13 -1.24 0.00
 2 26 14 2.73 0.00
 2 26 15 -1.34 0.00
 2 26 16 -4.18 0.00
 2 26 17 -6.41 0.00
 2 28 0 0.21 0.00
 2 28 1 3.57 0.00
 2 28 2 -8.70 0.00
 2 28 3 -2.09 0.00
 2 28 4 -19.44 0.00
 2 28 5 5.48 0.00
 2 28 6 3.94 0.00
 2 28 7 -6.78 0.00
 2 28 8 3.95 0.00
 2 28 9 -2.02 0.00
 2 28 10 -3.29 0.00
 2 28 11 5.21 0.00
 2 28 12 1.19 0.00
 2 28 13 6.15 0.00
 2 28 14 3.20 0.00
 2 28 15 4.57 0.00
 2 28 16 2.39 0.00
 2 28 17 6.78 0.00
 2 30 0 6.45 0.00
 2 30 1 -1.64 0.00
 2 30 2 -10.98 0.00
 2 30 3 -15.37 0.00
 2 30 4 -3.57 0.00
 2 30 5 7.23 0.00
 2 30 6 1.75 0.00
 2 30 7 -4.09 0.00
 2 30 8 -0.09 0.00
 2 30 9 4.92 0.00
 2 30 10 2.87 0.00
 2 30 11 -1.28 0.00
 2 30 12 0.66 0.00
 2 30 13 -7.83 0.00
 2 30 14 1.23 0.00
 2 30 15 0.67 0.00
 2 30 16 6.59 0.00
 2 32 0 2.05 0.00
 2 32 1 2.49 0.00
 2 32 2 11.47 0.00
 2 32 3 3.68 0.00
 2 32 4 5.73 0.00
 2 32 5 -4.56 0.00
 2 32 6 -7.50 0.00
 2 32 7 3.34 0.00
 2 32 8 7.02 0.00
 2 32 9 0.29 0.00
 2 32 10 -5.46 0.00
 2 32 11 7.29 0.00
 2 32 12 5.55 0.00
 2 32 13 -4.53 0.00
 2 32 14 -4.07 0.00
 2 32 15 0.36 0.00
 2 32 16 -12.50 0.00
 2 34 0 -25.05 0.00
 2 34 1 -9.40 0.00
 2 34 2 -13.24 0.00
 2 34 3 5.16 0.00
 2 34 4 -11.07 0.00
 2 34 5 2.33 0.00
 2 34 6 0.33 0.00
 2 34 7 4.58 0.00
 2 34 8 2.45 0.00
 2 34 9 -6.92 0.00
 2 34 10 6.44 0.00
 2 34 11 12.11 0.00
 2 34 12 2.39 0.00
 2 34 13 2.82 0.00
 2 34 14 -5.50 0.00
 2 34 15 5.24 0.00
 2 36 0 23.63 0.00
 2 36 1 -4.16 0.00
 2 36 2 7.39 0.00
 2 36 3 -7.19 0.00
 2 36 4 3.68 0.00
 2 36 5 -5.11 0.00
 2 36 6 -13.23 0.00
 2 36 7 1.29 0.00
 2 36 8 11.56 0.00
 2 36 9 3.48 0.00
 2 36 10 -9.26 0.00
 2 36 11 -8.19 0.00
 2 36 12 1.81 0.00
 2 36 13 -0.95 0.00
 2 36 14 0.19 0.00
 2 38 0 -6.19 0.00
 2 38 1 10.83 0.00
 2 38 2 -5.50 0.00
 2 38 3 -2.74 0.00
 2 38 4 -3.79 0.00
 2 38 5 0.91 0.00
 2 38 6 -0.87 0.00
 2 38 7 -0.50 0.00
 2 38 8 -2.58 0.00
 2 38 9 2.16 0.00
 2 38 10 2.48 0.00
 2 38 11 7.14 0.00
 2 38 12 2.25 0.00
 2 40 0 -7.95 0.00
 2 40 1 -7.34 0.00
 2 40 2 -1.61 0.00
 2 40 3 2.75 0.00
 2 40 4 -1.23 0.00
 2 40 5 -0.69 0.00
 2 40 6 5.09 0.00
 2 40 7 1.63 0.00
 2 40 8 3.02 0.00
 2 40 9 -8.51 0.00
 2 40 10 -2.33 0.00
 2 40 11 -1.34 0.00
 2 42 0 16.09 0.00
 2 42 1 4.90 0.00
 2 42 2 -1.44 0.00
 2 42 3 -2.35 0.00
 2 42 4 8.62 0.00
 2 42 5 2.92 0.00
 2 42 6 1.15 0.00
 2 42 7 -3.69 0.00
 2 42 8 -0.54 0.00
 2 42 9 4.99 0.00
 2 42 10 5.06 0.00
 2 44 0 -3.55 0.00
 2 44 1 1.18 0.00
 2 44 2 -6.40 0.00
 2 44 3 -1.23 0.00
 2 44 4 -5.79 0.00
 2 44 5 -1.26 0.00
 2 44 6 0.90 0.00
 2 44 7 0.88 0.00
 2 44 8 -2.58 0.00
 2 44 9 5.82 0.00
 2 46 0 -3.49 0.00
 2 46 1 -0.88 0.00
 2 46 2 10.53 0.00
 2 46 3 4.21 0.00
 2 46 4 4.21 0.00
 2 46 5 -3.35 0.00
 2 46 6 3.46 0.00
 2 46 7 2.40 0.00
 2 46 8 2.71 0.00
 2 48 0 -0.79 0.00
 2 48 1 -0.16 0.00
 2 48 2 -2.32 0.00
 2 48 3 -1.00 0.00
 2 48 4 -5.53 0.00
 2 48 5 -2.21 0.00
 3 1 1 47.17 0.00
 3 1 2 48.53 0.00
 3 1 3 28.92 0.00
 3 1 4 -57.85 0.00
 3 1 5 0.99 0.00
 3 1 6 61.66 0.00
 3 1 7 9.42 0.00
 3 1 8 23.45 0.00
 3 1 9 -7.24 0.00
 3 1 10 46.51 0.00
 3 1 11 -1.49 0.00
 3 1 12 -9.21 0.00
 3 1 13 -10.21 0.00
 3 1 14 20.82 0.00
 3 1 15 0.18 0.00
 3 1 16 8.08 0.00
 3 1 17 -2.35 0.00
 3 1 18 9.78 0.00
 3 1 19 2.33 0.00
 3 1 20 -2.77 0.00
 3 3 1 114.37 0.00
 3 3 2 -41.85 0.00
 3 3 3 83.22 0.00
 3 3 4 -19.93 0.00
 3 3 5 0.39 0.00
 3 3 6 3.30 0.00
 3 3 7 -17.71 0.00
 3 3 8 -25.55 0.00
 3 3 9 3.33 0.00
 3 3 10 5.46 0.00
 3 3 11 10.49 0.00
 3 3 12 -21.67 0.00
 3 3 13 -2.84 0.00
 3 3 14 -4.24 0.00
 3 3 15 1.10 0.00
 3 3 16 -12.55 0.00
 3 3 17 -3.69 0.00
 3 3 18 -1.82 0.00
 3 3 19 0.57 0.00
 3 3 20 3.41 0.00
 3 5 1 -134.00 0.00
 3 5 2 -78.24 0.00
 3 5 3 -103.78 0.00
 3 5 4 81.43 0.00
 3 5 5 45.66 0.00
 3 5 6 -20.67 0.00
 3 5 7 33.13 0.00
 3 5 8 20.06 0.00
 3 5 9 -5.69 0.00
 3 5 10 -18.78 0.00
 3 5 11 -9.95 0.00
 3 5 12 15.97 0.00
 3 5 13 3.82 0.00
 3 5 14 -5.20 0.00
 3 5 15 -4.39 0.00
 3 5 16 0.00 0.00
 3 5 17 -6.20 0.00
 3 5 18 -6.82 0.00
 3 5 19 -1.38 0.00
 3 5 20 7.84 0.00
 3 7 1 11.91 0.00
 3 7 2 104.33 0.00
 3 7 3 7.57 0.00
 3 7 4 7.68 0.00
 3 7 5 -23.83 0.00
 3 7 6 25.52 0.00
 3 7 7 5.42 0.00
 3 7 8 37.67 0.00
 3 7 9 2.08 0.00
 3 7 10 12.89 0.00
 3 7 11 15.95 0.00
 3 7 12 7.01 0.00
 3 7 13 0.49 0.00
 3 7 14 5.21 0.00
 3 7 15 2.56 0.00
 3 7 16 1.87 0.00
 3 7 17 -2.57 0.00
 3 7 18 7.04 0.00
 3 7 19 -2.76 0.00
 3 7 20 2.83 0.00
 3 9 1 -71.36 0.00
 3 9 2 17.03 0.00
 3 9 3 -19.90 0.00
 3 9 4 -44.94 0.00
 3 9 5 -26.34 0.00
 3 9 6 24.68 0.00
 3 9 7 2.08 0.00
 3 9 8 -28.90 0.00
 3 9 9 4.53 0.00
 3 9 10 17.22 0.00
 3 9 11 2.17 0.00
 3 9 12 -19.96 0.00
 3 9 13 -13.26 0.00
 3 9 14 -10.98 0.00
 3 9 15 8.22 0.00
 3 9 16 -9.32 0.00
 3 9 17 3.44 0.00
 3 9 18 -4.42 0.00
 3 9 19 6.09 0.00
 3 9 20 1.66 0.00
 3 11 1 35.60 0.00
 3 11 2 62.44 0.00
 3 11 3 -75.83 0.00
 3 11 4 14.46 0.00
 3 11 5 79.66 0.00
 3 11 6 41.39 0.00
 3 11 7 -7.80 0.00
 3 11 8 15.22 0.00
 3 11 9 2.42 0.00
 3 11 10 7.53 0.00
 3 11 11 -0.20 0.00
 3 11 12 17.55 0.00
 3 11 13 1.89 0.00
 3 11 14 15.80 0.00
 3 11 15 -7.24 0.00
 3 11 16 3.67 0.00
 3 11 17 -9.86 0.00
 3 11 18 -3.66 0.00
 3 11 19 -2.51 0.00
 3 11 20 -5.57 0.00
 3 13 1 26.28 0.00
 3 13 2 17.86 0.00
 3 13 3 -22.45 0.00
 3 13 4 -3.34 0.00
 3 13 5 13.19 0.00
 3 13 6 14.72 0.00
 3 13 7 -9.98 0.00
 3 13 8 15.98 0.00
 3 13 9 30.25 0.00
 3 13 10 -7.87 0.00
 3 13 11 -2.22 0.00
 3 13 12 0.50 0.00
 3 13 13 -5.57 0.00
 3 13 14 -9.19 0.00
 3 13 15 -0.71 0.00
 3 13 16 2.29 0.00
 3 13 17 4.66 0.00
 3 13 18 -2.01 0.00
 3 13 19 -0.87 0.00
 3 13 20 1.15 0.00
 3 15 1 7.95 0.00
 3 15 2 -9.05 0.00
 3 15 3 16.71 0.00
 3 15 4 25.37 0.00
 3 15 5 -22.88 0.00
 3 15 6 -24.65 0.00
 3 15 7 32.01 0.00
 3 15 8 12.17 0.00
 3 15 9 -0.39 0.00
 3 15 10 3.96 0.00
 3 15 11 -1.44 0.00
 3 15 12 3.54 0.00
 3 15 13 -0.08 0.00
 3 15 14 -11.43 0.00
 3 15 15 -7.90 0.00
 3 15 16 -6.86 0.00
 3 15 17 0.07 0.00
 3 15 18 -7.81 0.00
 3 15 19 -1.18 0.00
 3 17 1 -2.74 0.00
 3 17 2 25.57 0.00
 3 17 3 -0.39 0.00
 3 17 4 18.47 0.00
 3 17 5 -0.80 0.00
 3 17 6 16.82 0.00
 3 17 7 21.35 0.00
 3 17 8 28.73 0.00
 3 17 9 -3.59 0.00
 3 17 10 7.53 0.00
 3 17 11 -2.59 0.00
 3 17 12 8.17 0.00
 3 17 13 6.94 0.00
 3 17 14 8.09 0.00
 3 17 15 -3.56 0.00
 3 17 16 7.10 0.00
 3 17 17 -5.34 0.00
 3 17 18 3.13 0.00
 3 17 19 0.30 0.00
 3 19 1 7.93 0.00
 3 19 2 -24.88 0.00
 3 19 3 1.58 0.00
 3 19 4 19.66 0.00
 3 19 5 8.19 0.00
 3 19 6 4.47 0.00
 3 19 7 -14.20 0.00
 3 19 8 -9.34 0.00
 3 19 9 25.44 0.00
 3 19 10 4.61 0.00
 3 19 11 1.52 0.00
 3 19 12 -14.19 0.00
 3 19 13 -2.98 0.00
 3 19 14 -8.28 0.00
 3 19 15 0.70 0.00
 3 19 16 -7.23 0.00
 3 19 17 1.09 0.00
 3 19 18 -3.10 0.00
 3 19 19 5.28 0.00
 3 21 1 -12.65 0.00
 3 21 2 0.73 0.00
 3 21 3 20.27 0.00
 3 21 4 15.23 0.00
 3 21 5 -11.43 0.00
 3 21 6 -0.06 0.00
 3 21 7 16.21 0.00
 3 21 8 10.47 0.00
 3 21 9 -7.53 0.00
 3 21 10 8.03 0.00
 3 21 11 -4.79 0.00
 3 21 12 4.75 0.00
 3 21 13 -1.55 0.00
 3 21 14 0.96 0.00
 3 21 15 1.97 0.00
 3 21 16 -0.50 0.00
 3 21 17 0.65 0.00
 3 21 18 2.25 0.00
 3 23 1 -2.62 0.00
 3 23 2 10.14 0.00
 3 23 3 9.48 0.00
 3 23 4 9.97 0.00
 3 23 5 -7.25 0.00
 3 23 6 24.72 0.00
 3 23 7 6.98 0.00
 3 23 8 9.92 0.00
 3 23 9 4.09 0.00
 3 23 10 0.64 0.00
 3 23 11 14.03 0.00
 3 23 12 -0.59 0.00
 3 23 13 -4.96 0.00
 3 23 14 6.70 0.00
 3 23 15 -1.85 0.00
 3 23 16 1.11 0.00
 3 23 17 -3.14 0.00
 3 23 18 2.12 0.00
 3 25 1 15.35 0.00
 3 25 2 -10.70 0.00
 3 25 3 6.98 0.00
 3 25 4 -10.10 0.00
 3 25 5 8.30 0.00
 3 25 6 -1.93 0.00
 3 25 7 0.46 0.00
 3 25 8 -9.04 0.00
 3 25 9 -3.27 0.00
 3 25 10 -1.27 0.00
 3 25 11 -6.96 0.00
 3 25 12 -6.92 0.00
 3 25 13 3.80 0.00
 3 25 14 -6.56 0.00
 3 25 15 3.48 0.00
 3 25 16 -6.15 0.00
 3 25 17 8.09 0.00
 3 25 18 -1.98 0.00
 3 27 1 -0.09 0.00
 3 27 2 3.71 0.00
 3 27 3 0.22 0.00
 3 27 4 3.51 0.00
 3 27 5 5.16 0.00
 3 27 6 9.75 0.00
 3 27 7 1.39 0.00
 3 27 8 17.28 0.00
 3 27 9 -9.71 0.00
 3 27 10 -1.69 0.00
 3 27 11 7.74 0.00
 3 27 12 16.23 0.00
 3 27 13 -0.80 0.00
 3 27 14 0.01 0.00
 3 27 15 -5.38 0.00
 3 27 16 2.68 0.00
 3 27 17 -4.16 0.00
 3 29 1 -2.93 0.00
 3 29 2 -6.62 0.00
 3 29 3 1.78 0.00
 3 29 4 -0.43 0.00
 3 29 5 3.19 0.00
 3 29 6 3.38 0.00
 3 29 7 -0.77 0.00
 3 29 8 -5.39 0.00
 3 29 9 3.19 0.00
 3 29 10 -8.85 0.00
 3 29 11 3.59 0.00
 3 29 12 -1.71 0.00
 3 29 13 -6.32 0.00
 3 29 14 1.33 0.00
 3 29 15 3.91 0.00
 3 29 16 5.60 0.00
 3 29 17 7.67 0.00
 3 31 1 5.08 0.00
 3 31 2 -0.60 0.00
 3 31 3 -1.29 0.00
 3 31 4 -9.94 0.00
 3 31 5 0.36 0.00
 3 31 6 0.61 0.00
 3 31 7 -11.23 0.00
 3 31 8 -2.01 0.00
 3 31 9 -1.06 0.00
 3 31 10 2.31 0.00
 3 31 11 -1.18 0.00
 3 31 12 -3.20 0.00
 3 31 13 -2.91 0.00
 3 31 14 -1.85 0.00
 3 31 15 5.33 0.00
 3 31 16 -5.86 0.00
 3 33 1 -2.35 0.00
 3 33 2 4.88 0.00
 3 33 3 2.31 0.00
 3 33 4 11.13 0.00
 3 33 5 1.38 0.00
 3 33 6 0.99 0.00
 3 33 7 1.25 0.00
 3 33 8 3.69 0.00
 3 33 9 2.02 0.00
 3 33 10 3.02 0.00
 3 33 11 -7.79 0.00
 3 33 12 7.03 0.00
 3 33 13 -1.90 0.00
 3 33 14 7.55 0.00
 3 33 15 0.31 0.00
 3 35 1 -4.19 0.00
 3 35 2 -4.51 0.00
 3 35 3 -9.65 0.00
 3 35 4 -3.95 0.00
 3 35 5 0.94 0.00
 3 35 6 -2.29 0.00
 3 35 7 0.08 0.00
 3 35 8 -12.67 0.00
 3 35 9 -3.20 0.00
 3 35 10 -1.17 0.00
 3 35 11 5.38 0.00
 3 35 12 -3.39 0.00
 3 35 13 0.61 0.00
 3 35 14 6.41 0.00
 3 37 1 5.17 0.00
 3 37 2 0.72 0.00
 3 37 3 1.00 0.00
 3 37 4 -3.26 0.00
 3 37 5 2.70 0.00
 3 37 6 -0.50 0.00
 3 37 7 -2.10 0.00
 3 37 8 5.32 0.00
 3 37 9 -6.29 0.00
 3 37 10 3.19 0.00
 3 37 11 -0.61 0.00
 3 37 12 3.69 0.00
 3 37 13 2.82 0.00
 3 39 1 -5.21 0.00
 3 39 2 5.47 0.00
 3 39 3 4.58 0.00
 3 39 4 0.85 0.00
 3 39 5 -1.65 0.00
 3 39 6 -5.81 0.00
 3 39 7 4.00 0.00
 3 39 8 -4.19 0.00
 3 39 9 -9.05 0.00
 3 39 10 -0.35 0.00
 3 39 11 -1.81 0.00
 3 41 1 -0.95 0.00
 3 41 2 -3.71 0.00
 3 41 3 -6.31 0.00
 3 41 4 0.63 0.00
 3 41 5 2.19 0.00
 3 41 6 -0.78 0.00
 3 41 7 -3.38 0.00
 3 41 8 -5.75 0.00
 3 41 9 0.41 0.00
 3 41 10 -2.24 0.00
 3 41 11 12.56 0.00
 3 43 1 3.75 0.00
 3 43 2 2.73 0.00
 3 43 3 -0.43 0.00
 3 43 4 -1.94 0.00
 3 43 5 -0.97 0.00
 3 43 6 2.51 0.00
 3 43 7 0.43 0.00
 3 43 8 0.55 0.00
 3 43 9 -6.96 0.00
 3 43 10 1.07 0.00
 3 45 1 -6.49 0.00
 3 45 2 0.15 0.00
 3 45 3 1.11 0.00
 3 45 4 0.78 0.00
 3 45 5 -1.37 0.00
 3 45 6 -5.21 0.00
 3 45 7 -0.06 0.00
 3 45 8 -0.44 0.00
 3 47 1 -4.13 0.00
 3 47 2 0.31 0.00
 3 47 3 0.38 0.00
 3 47 4 3.61 0.00
 3 47 5 -4.75 0.00
 3 47 6 0.48 0.00
 4 0 0 632.78 0.00
 4 0 1 -134.64 0.00
 4 0 2 -57.74 0.00
 4 0 3 -98.70 0.00
 4 0 4 -17.07 0.00
 4 0 5 10.67 0.00
 4 0 6 2.82 0.00
 4 0 7 -24.55 0.00
 4 0 8 34.48 0.00
 4 0 9 -21.15 0.00
 4 0 10 -4.30 0.00
 4 0 11 -24.44 0.00
 4 0 12 3.18 0.00
 4 0 13 13.06 0.00
 4 0 14 1.16 0.00
 4 0 15 13.94 0.00
 4 0 16 4.45 0.00
 4 0 17 -1.23 0.00
 4 0 18 -11.64 0.00
 4 0 19 -10.80 0.00
 4 0 20 -3.14 0.00
 4 2 0 -30.44 0.00
 4 2 1 -117.01 0.00
 4 2 2 -5.20 0.00
 4 2 3 -10.84 0.00
 4 2 4 -56.96 0.00
 4 2 5 -32.85 0.00
 4 2 6 -26.47 0.00
 4 2 7 -9.13 0.00
 4 2 8 -14.95 0.00
 4 2 9 32.33 0.00
 4 2 10 -0.90 0.00
 4 2 11 18.11 0.00
 4 2 12 7.14 0.00
 4 2 13 -3.07 0.00
 4 2 14 -1.73 0.00
 4 2 15 -5.76 0.00
 4 2 16 -0.55 0.00
 4 2 17 -4.19 0.00
 4 2 18 3.23 0.00
 4 2 19 -2.53 0.00
 4 2 20 -3.77 0.00
 4 4 0 -7.39 0.00
 4 4 1 -87.89 0.00
 4 4 2 -50.97 0.00
 4 4 3 9.63 0.00
 4 4 4 3.32 0.00
 4 4 5 -38.33 0.00
 4 4 6 50.15 0.00
 4 4 7 -13.57 0.00
 4 4 8 -5.44 0.00
 4 4 9 -16.91 0.00
 4 4 10 9.97 0.00
 4 4 11 9.61 0.00
 4 4 12 3.24 0.00
 4 4 13 -2.16 0.00
 4 4 14 6.14 0.00
 4 4 15 5.09 0.00
 4 4 16 -5.23 0.00
 4 4 17 -5.82 0.00
 4 4 18 0.22 0.00
 4 4 19 0.20 0.00
 4 4 20 -6.48 0.00
 4 6 0 117.39 0.00
 4 6 1 -19.08 0.00
 4 6 2 -70.45 0.00
 4 6 3 -100.26 0.00
 4 6 4 -25.85 0.00
 4 6 5 18.64 0.00
 4 6 6 -24.82 0.00
 4 6 7 -4.54 0.00
 4 6 8 35.67 0.00
 4 6 9 28.47 0.00
 4 6 10 5.07 0.00
 4 6 11 -0.46 0.00
 4 6 12 -0.98 0.00
 4 6 13 7.22 0.00
 4 6 14 0.57 0.00
 4 6 15 -2.28 0.00
 4 6 16 -2.51 0.00
 4 6 17 3.17 0.00
 4 6 18 -6.89 0.00
 4 6 19 -4.38 0.00
 4 6 20 -7.20 0.00
 4 8 0 -169.42 0.00
 4 8 1 -57.53 0.00
 4 8 2 -65.77 0.00
 4 8 3 -13.10 0.00
 4 8 4 -43.00 0.00
 4 8 5 5.96 0.00
 4 8 6 -11.94 0.00
 4 8 7 -8.83 0.00
 4 8 8 2.30 0.00
 4 8 9 7.93 0.00
 4 8 10 -10.19 0.00
 4 8 11 -4.18 0.00
 4 8 12 6.65 0.00
 4 8 13 5.57 0.00
 4 8 14 2.70 0.00
 4 8 15 -9.12 0.00
 4 8 16 3.12 0.00
 4 8 17 1.58 0.00
 4 8 18 0.63 0.00
 4 8 19 -3.69 0.00
 4 8 20 -0.72 0.00
 4 10 0 30.66 0.00
 4 10 1 -32.45 0.00
 4 10 2 65.17 0.00
 4 10 3 -45.08 0.00
 4 10 4 -16.31 0.00
 4 10 5 -24.05 0.00
 4 10 6 10.09 0.00
 4 10 7 -14.02 0.00
 4 10 8 -9.51 0.00
 4 10 9 -26.10 0.00
 4 10 10 11.41 0.00
 4 10 11 22.94 0.00
 4 10 12 0.64 0.00
 4 10 13 -8.26 0.00
 4 10 14 -6.93 0.00
 4 10 15 -9.69 0.00
 4 10 16 -6.43 0.00
 4 10 17 -4.43 0.00
 4 10 18 -2.71 0.00
 4 10 19 0.58 0.00
 4 10 20 2.34 0.00
 4 12 0 -43.66 0.00
 4 12 1 -19.82 0.00
 4 12 2 -31.12 0.00
 4 12 3 -5.53 0.00
 4 12 4 -7.84 0.00
 4 12 5 -17.60 0.00
 4 12 6 -18.66 0.00
 4 12 7 -13.26 0.00
 4 12 8 -14.52 0.00
 4 12 9 5.70 0.00
 4 12 10 -3.07 0.00
 4 12 11 -3.54 0.00
 4 12 12 -15.45 0.00
 4 12 13 -4.28 0.00
 4 12 14 8.06 0.00
 4 12 15 9.87 0.00
 4 12 16 -6.57 0.00
 4 12 17 5.74 0.00
 4 12 18 -4.86 0.00
 4 12 19 -4.58 0.00
 4 12 20 -3.15 0.00
 4 14 0 19.40 0.00
 4 14 1 1.95 0.00
 4 14 2 -11.47 0.00
 4 14 3 -21.09 0.00
 4 14 4 -9.59 0.00
 4 14 5 -20.69 0.00
 4 14 6 -25.73 0.00
 4 14 7 -9.54 0.00
 4 14 8 -6.40 0.00
 4 14 9 6.33 0.00
 4 14 10 -11.11 0.00
 4 14 11 -17.35 0.00
 4 14 12 9.00 0.00
 4 14 13 -6.87 0.00
 4 14 14 -5.20 0.00
 4 14 15 -12.56 0.00
 4 14 16 2.18 0.00
 4 14 17 -2.25 0.00
 4 14 18 4.33 0.00
 4 14 19 -0.72 0.00
 4 16 0 6.32 0.00
 4 16 1 14.18 0.00
 4 16 2 30.89 0.00
 4 16 3 -18.23 0.00
 4 16 4 12.04 0.00
 4 16 5 -0.05 0.00
 4 16 6 4.01 0.00
 4 16 7 -14.24 0.00
 4 16 8 -22.34 0.00
 4 16 9 -16.22 0.00
 4 16 10 -5.95 0.00
 4 16 11 13.53 0.00
 4 16 12 -6.97 0.00
 4 16 13 0.00 0.00
 4 16 14 -12.29 0.00
 4 16 15 6.47 0.00
 4 16 16 -3.35 0.00
 4 16 17 -1.65 0.00
 4 16 18 -8.27 0.00
 4 16 19 -3.57 0.00
 4 18 0 -31.34 0.00
 4 18 1 -1.46 0.00
 4 18 2 0.62 0.00
 4 18 3 4.87 0.00
 4 18 4 -22.32 0.00
 4 18 5 -29.74 0.00
 4 18 6 -15.69 0.00
 4 18 7 3.31 0.00
 4 18 8 -18.02 0.00
 4 18 9 -7.74 0.00
 4 18 10 -10.94 0.00
 4 18 11 -4.21 0.00
 4 18 12 -4.81 0.00
 4 18 13 -6.59 0.00
 4 18 14 5.24 0.00
 4 18 15 6.39 0.00
 4 18 16 2.96 0.00
 4 18 17 -2.71 0.00
 4 18 18 1.24 0.00
 4 18 19 2.53 0.00
 4 20 0 17.76 0.00
 4 20 1 6.12 0.00
 4 20 2 -8.14 0.00
 4 20 3 -1.63 0.00
 4 20 4 -5.29 0.00
 4 20 5 -21.26 0.00
 4 20 6 -5.21 0.00
 4 20 7 3.80 0.00
 4 20 8 0.13 0.00
 4 20 9 -14.18 0.00
 4 20 10 -12.30 0.00
 4 20 11 -2.91 0.00
 4 20 12 4.35 0.00
 4 20 13 -5.11 0.00
 4 20 14 -3.01 0.00
 4 20 15 -5.64 0.00
 4 20 16 -2.00 0.00
 4 20 17 -1.00 0.00
 4 20 18 0.92 0.00
 4 22 0 17.49 0.00
 4 22 1 13.10 0.00
 4 22 2 -3.29 0.00
 4 22 3 -5.06 0.00
 4 22 4 11.89 0.00
 4 22 5 -13.96 0.00
 4 22 6 -7.13 0.00
 4 22 7 -22.49 0.00
 4 22 8 -17.53 0.00
 4 22 9 -6.37 0.00
 4 22 10 -8.31 0.00
 4 22 11 -6.72 0.00
 4 22 12 -11.77 0.00
 4 22 13 4.38 0.00
 4 22 14 -2.05 0.00
 4 22 15 3.93 0.00
 4 22 16 -1.20 0.00
 4 22 17 0.19 0.00
 4 22 18 -2.41 0.00
 4 24 0 -11.80 0.00
 4 24 1 -8.31 0.00
 4 24 2 -11.80 0.00
 4 24 3 0.06 0.00
 4 24 4 -33.61 0.00
 4 24 5 -11.15 0.00
 4 24 6 -21.91 0.00
 4 24 7 -3.19 0.00
 4 24 8 -16.02 0.00
 4 24 9 13.27 0.00
 4 24 10 -5.10 0.00
 4 24 11 -19.86 0.00
 4 24 12 0.12 0.00
 4 24 13 1.53 0.00
 4 24 14 8.44 0.00
 4 24 15 1.32 0.00
 4 24 16 -3.34 0.00
 4 24 17 2.64 0.00
 4 24 18 9.05 0.00
 4 26 0 25.81 0.00
 4 26 1 13.53 0.00
 4 26 2 11.49 0.00
 4 26 3 0.13 0.00
 4 26 4 12.64 0.00
 4 26 5 -12.16 0.00
 4 26 6 1.75 0.00
 4 26 7 -23.36 0.00
 4 26 8 -10.31 0.00
 4 26 9 -18.49 0.00
 4 26 10 -12.27 0.00
 4 26 11 -9.65 0.00
 4 26 12 -8.08 0.00
 4 26 13 -2.70 0.00
 4 26 14 -10.24 0.00
 4 26 15 -12.26 0.00
 4 26 16 1.94 0.00
 4 26 17 -6.32 0.00
 4 28 0 -5.60 0.00
 4 28 1 -2.57 0.00
 4 28 2 -2.99 0.00
 4 28 3 -1.26 0.00
 4 28 4 -12.35 0.00
 4 28 5 -0.47 0.00
 4 28 6 -7.28 0.00
 4 28 7 -4.47 0.00
 4 28 8 -15.54 0.00
 4 28 9 -6.61 0.00
 4 28 10 -14.59 0.00
 4 28 11 2.12 0.00
 4 28 12 -5.81 0.00
 4 28 13 -1.90 0.00
 4 28 14 -4.82 0.00
 4 28 15 11.69 0.00
 4 28 16 1.69 0.00
 4 28 17 9.40 0.00
 4 30 0 5.10 0.00
 4 30 1 8.12 0.00
 4 30 2 7.73 0.00
 4 30 3 -0.25 0.00
 4 30 4 -12.39 0.00
 4 30 5 -5.13 0.00
 4 30 6 -7.14 0.00
 4 30 7 -5.32 0.00
 4 30 8 -6.35 0.00
 4 30 9 -16.57 0.00
 4 30 10 -3.53 0.00
 4 30 11 -10.67 0.00
 4 30 12 -2.08 0.00
 4 30 13 -18.33 0.00
 4 30 14 -2.29 0.00
 4 30 15 -4.85 0.00
 4 30 16 4.84 0.00
 4 32 0 5.03 0.00
 4 32 1 0.04 0.00
 4 32 2 8.77 0.00
 4 32 3 5.86 0.00
 4 32 4 11.39 0.00
 4 32 5 -1.60 0.00
 4 32 6 -2.47 0.00
 4 32 7 -13.32 0.00
 4 32 8 -7.26 0.00
 4 32 9 -5.68 0.00
 4 32 10 -11.08 0.00
 4 32 11 -4.60 0.00
 4 32 12 -11.39 0.00
 4 32 13 -5.04 0.00
 4 32 14 -10.76 0.00
 4 32 15 -5.54 0.00
 4 34 0 -0.26 0.00
 4 34 1 0.99 0.00
 4 34 2 -14.43 0.00
 4 34 3 -0.97 0.00
 4 34 4 -4.75 0.00
 4 34 5 -0.50 0.00
 4 34 6 -19.37 0.00
 4 34 7 -1.47 0.00
 4 34 8 -3.15 0.00
 4 34 9 -5.63 0.00
 4 34 10 -5.95 0.00
 4 34 11 -6.14 0.00
 4 34 12 -2.62 0.00
 4 34 13 -4.18 0.00
 4 34 14 -2.51 0.00
 4 36 0 10.85 0.00
 4 36 1 -1.67 0.00
 4 36 2 9.72 0.00
 4 36 3 -4.47 0.00
 4 36 4 1.02 0.00
 4 36 5 -4.50 0.00
 4 36 6 -4.08 0.00
 4 36 7 -7.40 0.00
 4 36 8 0.46 0.00
 4 36 9 -14.21 0.00
 4 36 10 -4.78 0.00
 4 36 11 -2.80 0.00
 4 36 12 -4.89 0.00
 4 36 13 -10.31 0.00
 4 38 0 -0.74 0.00
 4 38 1 3.06 0.00
 4 38 2 -12.95 0.00
 4 38 3 -2.34 0.00
 4 38 4 -4.57 0.00
 4 38 5 0.05 0.00
 4 38 6 -6.79 0.00
 4 38 7 -3.49 0.00
 4 38 8 -3.81 0.00
 4 38 9 -1.01 0.00
 4 38 10 -9.70 0.00
 4 38 11 -7.67 0.00
 4 38 12 -8.69 0.00
 4 40 0 0.27 0.00
 4 40 1 -5.69 0.00
 4 40 2 -2.12 0.00
 4 40 3 -2.61 0.00
 4 40 4 0.78 0.00
 4 40 5 -4.89 0.00
 4 40 6 0.26 0.00
 4 40 7 -5.94 0.00
 4 40 8 0.37 0.00
 4 40 9 -5.90 0.00
 4 40 10 -0.30 0.00
 4 40 11 -2.12 0.00
 4 42 0 -8.30 0.00
 4 42 1 -3.48 0.00
 4 42 2 0.73 0.00
 4 42 3 -0.51 0.00
 4 42 4 -9.30 0.00
 4 42 5 -5.81 0.00
 4 42 6 6.31 0.00
 4 42 7 0.70 0.00
 4 42 8 -4.81 0.00
 4 42 9 -9.37 0.00
 4 42 10 -6.20 0.00
 4 44 0 -2.17 0.00
 4 44 1 0.33 0.00
 4 44 2 -8.62 0.00
 4 44 3 -10.50 0.00
 4 44 4 5.30 0.00
 4 44 5 4.29 0.00
 4 44 6 -2.33 0.00
 4 44 7 -0.78 0.00
 4 44 8 -3.38 0.00
 4 44 9 2.83 0.00
 4 46 0 -4.09 0.00
 4 46 1 -0.39 0.00
 4 46 2 -3.34 0.00
 4 46 3 -7.99 0.00
 4 46 4 -4.57 0.00
 4 46 5 2.07 0.00
 4 46 6 5.20 0.00
 4 46 7 -9.88 0.00
 4 48 1 -2.99 0.00
 4 48 2 5.20 0.00
 4 48 3 -1.52 0.00
 4 48 4 -0.16 0.00
 5 1 1 79.30 0.00
 5 1 2 -0.37 0.00
 5 1 3 76.76 0.00
 5 1 4 43.33 0.00
 5 1 5 -13.53 0.00
 5 1 6 -3.01 0.00
 5 1 7 -7.32 0.00
 5 1 8 45.01 0.00
 5 1 9 12.08 0.00
 5 1 10 -1.78 0.00
 5 1 11 7.39 0.00
 5 1 12 -4.20 0.00
 5 1 13 -9.07 0.00
 5 1 14 -3.85 0.00
 5 1 15 6.56 0.00
 5 1 16 18.06 0.00
 5 1 17 4.84 0.00
 5 1 18 5.65 0.00
 5 1 19 -0.83 0.00
 5 1 20 1.80 0.00
 5 3 1 1.21 0.00
 5 3 2 -16.91 0.00
 5 3 3 34.93 0.00
 5 3 4 -15.68 0.00
 5 3 5 20.73 0.00
 5 3 6 1.97 0.00
 5 3 7 -4.52 0.00
 5 3 8 -3.50 0.00
 5 3 9 -7.57 0.00
 5 3 10 4.18 0.00
 5 3 11 -4.84 0.00
 5 3 12 7.22 0.00
 5 3 13 -0.27 0.00
 5 3 14 -5.78 0.00
 5 3 15 -8.30 0.00
 5 3 16 -12.29 0.00
 5 3 17 -7.67 0.00
 5 3 18 -5.44 0.00
 5 3 19 -1.33 0.00
 5 3 20 -0.49 0.00
 5 5 1 35.04 0.00
 5 5 2 15.63 0.00
 5 5 3 -60.08 0.00
 5 5 4 21.67 0.00
 5 5 5 28.72 0.00
 5 5 6 54.18 0.00
 5 5 7 34.52 0.00
 5 5 8 -24.50 0.00
 5 5 9 0.99 0.00
 5 5 10 0.78 0.00
 5 5 11 1.59 0.00
 5 5 12 -23.14 0.00
 5 5 13 -0.28 0.00
 5 5 14 2.86 0.00
 5 5 15 3.07 0.00
 5 5 16 -12.12 0.00
 5 5 17 -10.62 0.00
 5 5 18 3.85 0.00
 5 5 19 2.94 0.00
 5 5 20 -2.17 0.00
 5 7 1 34.26 0.00
 5 7 2 36.88 0.00
 5 7 3 -8.82 0.00
 5 7 4 39.99 0.00
 5 7 5 43.14 0.00
 5 7 6 18.65 0.00
 5 7 7 -30.10 0.00
 5 7 8 24.74 0.00
 5 7 9 7.79 0.00
 5 7 10 35.18 0.00
 5 7 11 -2.11 0.00
 5 7 12 7.32 0.00
 5 7 13 -16.32 0.00
 5 7 14 6.16 0.00
 5 7 15 1.67 0.00
 5 7 16 5.77 0.00
 5 7 17 -3.59 0.00
 5 7 18 1.54 0.00
 5 7 19 -1.03 0.00
 5 7 20 4.74 0.00
 5 9 1 27.22 0.00
 5 9 2 41.18 0.00
 5 9 3 -31.14 0.00
 5 9 4 3.34 0.00
 5 9 5 3.08 0.00
 5 9 6 -2.18 0.00
 5 9 7 30.73 0.00
 5 9 8 16.56 0.00
 5 9 9 8.72 0.00
 5 9 10 -26.83 0.00
 5 9 11 6.18 0.00
 5 9 12 -5.98 0.00
 5 9 13 -4.63 0.00
 5 9 14 -21.80 0.00
 5 9 15 -3.51 0.00
 5 9 16 -10.64 0.00
 5 9 17 -0.31 0.00
 5 9 18 -7.23 0.00
 5 9 19 1.94 0.00
 5 9 20 -5.17 0.00
 5 11 1 -41.74 0.00
 5 11 2 41.31 0.00
 5 11 3 41.38 0.00
 5 11 4 22.35 0.00
 5 11 5 26.70 0.00
 5 11 6 58.23 0.00
 5 11 7 6.39 0.00
 5 11 8 19.08 0.00
 5 11 9 5.83 0.00
 5 11 10 13.32 0.00
 5 11 11 -8.92 0.00
 5 11 12 13.06 0.00
 5 11 13 -14.21 0.00
 5 11 14 8.14 0.00
 5 11 15 -4.21 0.00
 5 11 16 -0.31 0.00
 5 11 17 -7.54 0.00
 5 11 18 0.60 0.00
 5 11 19 -2.67 0.00
 5 11 20 2.50 0.00
 5 13 1 29.26 0.00
 5 13 2 12.17 0.00
 5 13 3 10.24 0.00
 5 13 4 39.17 0.00
 5 13 5 24.05 0.00
 5 13 6 15.75 0.00
 5 13 7 31.43 0.00
 5 13 8 7.27 0.00
 5 13 9 12.29 0.00
 5 13 10 -1.05 0.00
 5 13 11 3.13 0.00
 5 13 12 -4.87 0.00
 5 13 13 -10.63 0.00
 5 13 14 -11.06 0.00
 5 13 15 0.99 0.00
 5 13 16 -1.95 0.00
 5 13 17 0.98 0.00
 5 13 18 0.61 0.00
 5 13 19 -4.61 0.00
 5 15 1 35.53 0.00
 5 15 2 34.80 0.00
 5 15 3 -5.66 0.00
 5 15 4 12.17 0.00
 5 15 5 21.62 0.00
 5 15 6 10.75 0.00
 5 15 7 5.89 0.00
 5 15 8 18.15 0.00
 5 15 9 16.04 0.00
 5 15 10 5.98 0.00
 5 15 11 -10.96 0.00
 5 15 12 -5.67 0.00
 5 15 13 -1.00 0.00
 5 15 14 -8.59 0.00
 5 15 15 -13.07 0.00
 5 15 16 -7.54 0.00
 5 15 17 -1.64 0.00
 5 15 18 -6.25 0.00
 5 15 19 4.14 0.00
 5 17 1 -6.46 0.00
 5 17 2 -4.33 0.00
 5 17 3 36.26 0.00
 5 17 4 48.88 0.00
 5 17 5 11.43 0.00
 5 17 6 28.99 0.00
 5 17 7 24.40 0.00
 5 17 8 17.93 0.00
 5 17 9 13.13 0.00
 5 17 10 8.80 0.00
 5 17 11 -6.18 0.00
 5 17 12 6.36 0.00
 5 17 13 1.70 0.00
 5 17 14 2.28 0.00
 5 17 15 -5.26 0.00
 5 17 16 7.34 0.00
 5 17 17 -0.12 0.00
 5 17 18 -1.21 0.00
 5 17 19 -5.32 0.00
 5 19 1 4.49 0.00
 5 19 2 10.99 0.00
 5 19 3 30.74 0.00
 5 19 4 15.72 0.00
 5 19 5 -8.19 0.00
 5 19 6 3.90 0.00
 5 19 7 32.94 0.00
 5 19 8 11.12 0.00
 5 19 9 -9.41 0.00
 5 19 10 -4.10 0.00
 5 19 11 6.63 0.00
 5 19 12 -10.00 0.00
 5 19 13 -2.13 0.00
 5 19 14 -6.93 0.00
 5 19 15 2.83 0.00
 5 19 16 -3.36 0.00
 5 19 17 -0.79 0.00
 5 19 18 -1.50 0.00
 5 21 1 13.47 0.00
 5 21 2 -2.00 0.00
 5 21 3 -2.87 0.00
 5 21 4 8.11 0.00
 5 21 5 26.36 0.00
 5 21 6 32.13 0.00
 5 21 7 -1.57 0.00
 5 21 8 4.45 0.00
 5 21 9 14.32 0.00
 5 21 10 14.56 0.00
 5 21 11 4.48 0.00
 5 21 12 -4.57 0.00
 5 21 13 -6.38 0.00
 5 21 14 5.82 0.00
 5 21 15 -0.50 0.00
 5 21 16 -5.32 0.00
 5 21 17 -5.74 0.00
 5 21 18 -5.44 0.00
 5 23 1 1.58 0.00
 5 23 2 7.88 0.00
 5 23 3 11.03 0.00
 5 23 4 22.38 0.00
 5 23 5 18.54 0.00
 5 23 6 18.05 0.00
 5 23 7 13.37 0.00
 5 23 8 8.60 0.00
 5 23 9 1.02 0.00
 5 23 10 0.17 0.00
 5 23 11 -0.94 0.00
 5 23 12 4.98 0.00
 5 23 13 2.70 0.00
 5 23 14 4.62 0.00
 5 23 15 -2.46 0.00
 5 23 16 3.18 0.00
 5 23 17 3.16 0.00
 5 23 18 4.85 0.00
 5 25 1 -9.60 0.00
 5 25 2 -6.38 0.00
 5 25 3 15.02 0.00
 5 25 4 -12.66 0.00
 5 25 5 -10.31 0.00
 5 25 6 -5.01 0.00
 5 25 7 10.69 0.00
 5 25 8 23.70 0.00
 5 25 9 -9.04 0.00
 5 25 10 -9.35 0.00
 5 25 11 17.93 0.00
 5 25 12 0.61 0.00
 5 25 13 1.08 0.00
 5 25 14 -10.36 0.00
 5 25 15 3.40 0.00
 5 25 16 -0.03 0.00
 5 25 17 4.30 0.00
 5 27 1 -1.99 0.00
 5 27 2 -0.26 0.00
 5 27 3 4.08 0.00
 5 27 4 13.12 0.00
 5 27 5 17.08 0.00
 5 27 6 11.27 0.00
 5 27 7 3.83 0.00
 5 27 8 -0.17 0.00
 5 27 9 0.38 0.00
 5 27 10 5.69 0.00
 5 27 11 6.16 0.00
 5 27 12 7.47 0.00
 5 27 13 -4.50 0.00
 5 27 14 9.74 0.00
 5 27 15 -3.68 0.00
 5 27 16 -0.14 0.00
 5 27 17 2.23 0.00
 5 29 1 1.39 0.00
 5 29 2 -3.25 0.00
 5 29 3 -10.12 0.00
 5 29 4 -9.24 0.00
 5 29 5 1.67 0.00
 5 29 6 6.71 0.00
 5 29 7 -8.78 0.00
 5 29 8 4.54 0.00
 5 29 9 4.51 0.00
 5 29 10 -4.73 0.00
 5 29 11 -0.23 0.00
 5 29 12 0.37 0.00
 5 29 13 6.16 0.00
 5 29 14 0.55 0.00
 5 29 15 4.53 0.00
 5 29 16 3.47 0.00
 5 31 1 8.47 0.00
 5 31 2 1.85 0.00
 5 31 3 -0.05 0.00
 5 31 4 -7.22 0.00
 5 31 5 1.04 0.00
 5 31 6 -6.71 0.00
 5 31 7 -2.94 0.00
 5 31 8 -1.02 0.00
 5 31 9 4.92 0.00
 5 31 10 -2.82 0.00
 5 31 11 -0.77 0.00
 5 31 12 3.91 0.00
 5 31 13 0.13 0.00
 5 31 14 -2.49 0.00
 5 31 15 2.19 0.00
 5 33 1 -6.90 0.00
 5 33 2 -1.34 0.00
 5 33 3 -9.51 0.00
 5 33 4 3.02 0.00
 5 33 5 4.06 0.00
 5 33 6 9.10 0.00
 5 33 7 -10.29 0.00
 5 33 8 -6.21 0.00
 5 33 9 -1.03 0.00
 5 33 10 8.34 0.00
 5 33 11 3.65 0.00
 5 33 12 6.74 0.00
 5 33 13 -3.12 0.00
 5 33 14 6.04 0.00
 5 33 15 3.26 0.00
 5 35 1 -5.00 0.00
 5 35 2 -0.16 0.00
 5 35 3 -0.74 0.00
 5 35 4 -6.46 0.00
 5 35 5 -4.74 0.00
 5 35 6 -7.54 0.00
 5 35 7 7.76 0.00
 5 35 8 -3.42 0.00
 5 35 9 -3.22 0.00
 5 35 10 -4.94 0.00
 5 35 11 -0.78 0.00
 5 35 12 0.73 0.00
 5 35 13 6.00 0.00
 5 35 14 3.85 0.00
 5 37 1 -5.68 0.00
 5 37 2 -4.11 0.00
 5 37 3 1.63 0.00
 5 37 4 -4.53 0.00
 5 37 5 -3.96 0.00
 5 37 6 -0.87 0.00
 5 37 7 -2.45 0.00
 5 37 8 -7.59 0.00
 5 37 9 -10.26 0.00
 5 37 10 5.43 0.00
 5 37 11 4.67 0.00
 5 37 12 9.13 0.00
 5 39 1 5.15 0.00
 5 39 2 8.71 0.00
 5 39 3 -8.12 0.00
 5 39 4 -4.52 0.00
 5 39 5 -4.70 0.00
 5 39 6 -0.35 0.00
 5 39 7 -2.45 0.00
 5 39 8 -0.17 0.00
 5 39 9 0.03 0.00
 5 39 10 1.15 0.00
 5 39 11 7.82 0.00
 5 41 1 -5.35 0.00
 5 41 2 -3.04 0.00
 5 41 3 2.41 0.00
 5 41 4 -9.02 0.00
 5 41 5 -0.97 0.00
 5 41 6 -4.04 0.00
 5 41 7 1.04 0.00
 5 41 8 -3.73 0.00
 5 41 9 -7.06 0.00
 5 41 10 -6.76 0.00
 5 43 1 -6.56 0.00
 5 43 2 -2.88 0.00
 5 43 3 -1.13 0.00
 5 43 4 7.50 0.00
 5 43 5 -7.95 0.00
 5 43 6 2.88 0.00
 5 43 7 -4.22 0.00
 5 43 8 -3.83 0.00
 5 43 9 1.32 0.00
 5 45 1 3.36 0.00
 5 45 2 -1.05 0.00
 5 45 3 -2.38 0.00
 5 45 4 -6.06 0.00
 5 45 5 2.81 0.00
 5 45 6 -0.82 0.00
 5 45 7 -2.59 0.00
 5 45 8 -3.08 0.00
 5 47 1 -0.95 0.00
 5 47 2 1.11 0.00
 5 47 3 -3.29 0.00
 5 47 4 -2.63 0.00
 5 47 5 -5.60 0.00
 6 0 0 167.14 0.00
 6 0 1 -42.16 0.00
 6 0 2 95.41 0.00
 6 0 3 -47.10 0.00
 6 0 4 22.91 0.00
 6 0 5 -19.07 0.00
 6 0 6 13.59 0.00
 6 0 7 -10.72 0.00
 6 0 8 31.21 0.00
 6 0 9 -10.39 0.00
 6 0 10 14.38 0.00
 6 0 11 -9.57 0.00
 6 0 12 6.79 0.00
 6 0 13 7.70 0.00
 6 0 14 4.91 0.00
 6 0 15 8.16 0.00
 6 0 16 -11.51 0.00
 6 0 17 -3.93 0.00
 6 0 18 -11.22 0.00
 6 0 19 -5.59 0.00
 6 0 20 -8.75 0.00
 6 2 0 140.04 0.00
 6 2 1 -57.47 0.00
 6 2 2 -39.62 0.00
 6 2 3 16.99 0.00
 6 2 4 -41.90 0.00
 6 2 5 6.44 0.00
 6 2 6 -20.63 0.00
 6 2 7 1.96 0.00
 6 2 8 -1.91 0.00
 6 2 9 17.76 0.00
 6 2 10 -1.95 0.00
 6 2 11 10.96 0.00
 6 2 12 4.38 0.00
 6 2 13 -6.57 0.00
 6 2 14 -3.09 0.00
 6 2 15 -2.89 0.00
 6 2 16 8.26 0.00
 6 2 17 -2.75 0.00
 6 2 18 7.17 0.00
 6 2 19 3.84 0.00
 6 2 20 7.36 0.00
 6 4 0 -40.26 0.00
 6 4 1 -19.32 0.00
 6 4 2 9.78 0.00
 6 4 3 -9.69 0.00
 6 4 4 35.84 0.00
 6 4 5 -13.23 0.00
 6 4 6 25.24 0.00
 6 4 7 -20.52 0.00
 6 4 8 -1.29 0.00
 6 4 9 2.46 0.00
 6 4 10 17.37 0.00
 6 4 11 12.75 0.00
 6 4 12 12.37 0.00
 6 4 13 10.06 0.00
 6 4 14 -4.75 0.00
 6 4 15 -3.73 0.00
 6 4 16 -5.53 0.00
 6 4 17 -2.38 0.00
 6 4 18 -2.94 0.00
 6 4 19 -1.05 0.00
 6 4 20 -6.33 0.00
 6 6 0 32.26 0.00
 6 6 1 -9.71 0.00
 6 6 2 -7.17 0.00
 6 6 3 -6.56 0.00
 6 6 4 -26.71 0.00
 6 6 5 -9.98 0.00
 6 6 6 -12.22 0.00
 6 6 7 35.76 0.00
 6 6 8 35.27 0.00
 6 6 9 17.13 0.00
 6 6 10 17.45 0.00
 6 6 11 3.25 0.00
 6 6 12 0.47 0.00
 6 6 13 3.81 0.00
 6 6 14 7.87 0.00
 6 6 15 -4.67 0.00
 6 6 16 -2.46 0.00
 6 6 17 1.24 0.00
 6 6 18 -3.07 0.00
 6 6 19 -1.00 0.00
 6 6 20 0.85 0.00
 6 8 0 -1.76 0.00
 6 8 1 -6.89 0.00
 6 8 2 -54.40 0.00
 6 8 3 -38.70 0.00
 6 8 4 -18.79 0.00
 6 8 5 16.23 0.00
 6 8 6 -6.29 0.00
 6 8 7 -13.70 0.00
 6 8 8 2.13 0.00
 6 8 9 8.87 0.00
 6 8 10 10.18 0.00
 6 8 11 16.72 0.00
 6 8 12 -0.61 0.00
 6 8 13 -0.91 0.00
 6 8 14 0.39 0.00
 6 8 15 -3.99 0.00
 6 8 16 0.32 0.00
 6 8 17 -0.19 0.00
 6 8 18 5.04 0.00
 6 8 19 0.81 0.00
 6 8 20 0.69 0.00
 6 10 0 -23.01 0.00
 6 10 1 -4.95 0.00
 6 10 2 25.10 0.00
 6 10 3 -11.29 0.00
 6 10 4 37.31 0.00
 6 10 5 10.67 0.00
 6 10 6 -5.29 0.00
 6 10 7 -29.96 0.00
 6 10 8 19.00 0.00
 6 10 9 15.25 0.00
 6 10 10 9.43 0.00
 6 10 11 6.86 0.00
 6 10 12 8.66 0.00
 6 10 13 2.72 0.00
 6 10 14 -1.96 0.00
 6 10 15 -10.55 0.00
 6 10 16 -13.47 0.00
 6 10 17 4.22 0.00
 6 10 18 0.12 0.00
 6 10 19 -1.24 0.00
 6 10 20 5.75 0.00
 6 12 0 22.40 0.00
 6 12 1 -5.45 0.00
 6 12 2 17.75 0.00
 6 12 3 5.39 0.00
 6 12 4 -40.89 0.00
 6 12 5 -27.42 0.00
 6 12 6 5.13 0.00
 6 12 7 9.59 0.00
 6 12 8 -1.27 0.00
 6 12 9 6.08 0.00
 6 12 10 6.91 0.00
 6 12 11 2.54 0.00
 6 12 12 7.30 0.00
 6 12 13 -2.41 0.00
 6 12 14 -1.25 0.00
 6 12 15 -1.57 0.00
 6 12 16 -1.22 0.00
 6 12 17 0.82 0.00
 6 12 18 -0.38 0.00
 6 12 19 -2.44 0.00
 6 14 0 -27.99 0.00
 6 14 1 12.34 0.00
 6 14 2 -6.80 0.00
 6 14 3 -2.36 0.00
 6 14 4 -2.66 0.00
 6 14 5 -17.97 0.00
 6 14 6 7.22 0.00
 6 14 7 21.19 0.00
 6 14 8 -6.06 0.00
 6 14 9 -3.21 0.00
 6 14 10 9.28 0.00
 6 14 11 9.81 0.00
 6 14 12 -10.43 0.00
 6 14 13 -11.81 0.00
 6 14 14 -2.79 0.00
 6 14 15 2.08 0.00
 6 14 16 3.70 0.00
 6 14 17 -1.56 0.00
 6 14 18 3.85 0.00
 6 14 19 8.80 0.00
 6 16 0 55.20 0.00
 6 16 1 -0.14 0.00
 6 16 2 20.40 0.00
 6 16 3 13.89 0.00
 6 16 4 18.30 0.00
 6 16 5 -5.55 0.00
 6 16 6 3.47 0.00
 6 16 7 -1.55 0.00
 6 16 8 -0.22 0.00
 6 16 9 5.48 0.00
 6 16 10 -1.64 0.00
 6 16 11 9.45 0.00
 6 16 12 5.01 0.00
 6 16 13 -3.08 0.00
 6 16 14 -7.72 0.00
 6 16 15 -2.62 0.00
 6 16 16 -10.42 0.00
 6 16 17 -0.11 0.00
 6 16 18 -3.39 0.00
 6 16 19 -5.54 0.00
 6 18 0 -1.20 0.00
 6 18 1 8.56 0.00
 6 18 2 -15.65 0.00
 6 18 3 -7.15 0.00
 6 18 4 -21.88 0.00
 6 18 5 -1.54 0.00
 6 18 6 -4.41 0.00
 6 18 7 11.66 0.00
 6 18 8 4.40 0.00
 6 18 9 7.89 0.00
 6 18 10 -0.63 0.00
 6 18 11 -1.51 0.00
 6 18 12 -0.07 0.00
 6 18 13 -3.42 0.00
 6 18 14 -2.16 0.00
 6 18 15 0.42 0.00
 6 18 16 5.03 0.00
 6 18 17 4.02 0.00
 6 18 18 4.57 0.00
 6 20 0 -8.74 0.00
 6 20 1 8.67 0.00
 6 20 2 24.85 0.00
 6 20 3 7.72 0.00
 6 20 4 10.17 0.00
 6 20 5 -7.51 0.00
 6 20 6 10.31 0.00
 6 20 7 -1.19 0.00
 6 20 8 -10.38 0.00
 6 20 9 -3.06 0.00
 6 20 10 -3.56 0.00
 6 20 11 -2.89 0.00
 6 20 12 -5.51 0.00
 6 20 13 -8.71 0.00
 6 20 14 -4.57 0.00
 6 20 15 -2.26 0.00
 6 20 16 -0.07 0.00
 6 20 17 -2.31 0.00
 6 20 18 2.79 0.00
 6 22 0 30.53 0.00
 6 22 1 8.71 0.00
 6 22 2 -0.95 0.00
 6 22 3 3.53 0.00
 6 22 4 -5.02 0.00
 6 22 5 -11.75 0.00
 6 22 6 -2.73 0.00
 6 22 7 5.34 0.00
 6 22 8 0.59 0.00
 6 22 9 8.90 0.00
 6 22 10 -0.39 0.00
 6 22 11 -8.02 0.00
 6 22 12 4.06 0.00
 6 22 13 7.13 0.00
 6 22 14 -1.15 0.00
 6 22 15 -3.88 0.00
 6 22 16 -3.23 0.00
 6 22 17 0.77 0.00
 6 22 18 -5.56 0.00
 6 24 0 0.86 0.00
 6 24 1 8.63 0.00
 6 24 2 -12.75 0.00
 6 24 3 4.08 0.00
 6 24 4 0.50 0.00
 6 24 5 6.93 0.00
 6 24 6 -3.55 0.00
 6 24 7 2.37 0.00
 6 24 8 -11.08 0.00
 6 24 9 -8.62 0.00
 6 24 10 2.34 0.00
 6 24 11 -12.64 0.00
 6 24 12 -9.32 0.00
 6 24 13 -0.99 0.00
 6 24 14 0.29 0.00
 6 24 15 -2.88 0.00
 6 24 16 1.97 0.00
 6 24 17 3.73 0.00
 6 26 0 21.84 0.00
 6 26 1 5.39 0.00
 6 26 2 27.89 0.00
 6 26 3 5.12 0.00
 6 26 4 7.01 0.00
 6 26 5 -6.11 0.00
 6 26 6 14.24 0.00
 6 26 7 -11.85 0.00
 6 26 8 -16.74 0.00
 6 26 9 5.64 0.00
 6 26 10 -3.19 0.00
 6 26 11 -1.23 0.00
 6 26 12 -10.68 0.00
 6 26 13 -8.32 0.00
 6 26 14 -1.59 0.00
 6 26 15 -1.79 0.00
 6 26 16 -3.87 0.00
 6 26 17 0.74 0.00
 6 28 0 0.62 0.00
 6 28 1 12.34 0.00
 6 28 2 -1.56 0.00
 6 28 3 10.68 0.00
 6 28 4 -1.65 0.00
 6 28 5 12.31 0.00
 6 28 6 -1.29 0.00
 6 28 7 3.19 0.00
 6 28 8 -1.15 0.00
 6 28 9 -2.46 0.00
 6 28 10 -0.91 0.00
 6 28 11 -7.06 0.00
 6 28 12 -3.65 0.00
 6 28 13 2.22 0.00
 6 28 14 0.18 0.00
 6 28 15 4.91 0.00
 6 28 16 3.64 0.00
 6 30 0 14.90 0.00
 6 30 1 2.38 0.00
 6 30 2 6.48 0.00
 6 30 3 5.25 0.00
 6 30 4 13.91 0.00
 6 30 5 0.04 0.00
 6 30 6 2.39 0.00
 6 30 7 2.66 0.00
 6 30 8 -2.98 0.00
 6 30 9 -7.72 0.00
 6 30 10 -3.30 0.00
 6 30 11 -5.33 0.00
 6 30 12 -1.26 0.00
 6 30 13 -10.35 0.00
 6 30 14 -3.89 0.00
 6 30 15 1.07 0.00
 6 30 16 9.76 0.00
 6 32 0 2.48 0.00
 6 32 1 10.59 0.00
 6 32 2 16.31 0.00
 6 32 3 8.77 0.00
 6 32 4 6.36 0.00
 6 32 5 2.85 0.00
 6 32 6 -1.11 0.00
 6 32 7 4.35 0.00
 6 32 8 4.63 0.00
 6 32 9 -1.74 0.00
 6 32 10 -0.91 0.00
 6 32 11 5.36 0.00
 6 32 12 0.27 0.00
 6 32 13 1.16 0.00
 6 32 14 -5.01 0.00
 6 32 15 4.32 0.00
 6 34 0 -4.71 0.00
 6 34 1 5.92 0.00
 6 34 2 6.19 0.00
 6 34 3 0.53 0.00
 6 34 4 0.53 0.00
 6 34 5 9.20 0.00
 6 34 6 -3.31 0.00
 6 34 7 -3.20 0.00
 6 34 8 -1.46 0.00
 6 34 9 0.45 0.00
 6 34 10 0.68 0.00
 6 34 11 -5.81 0.00
 6 34 12 5.77 0.00
 6 34 13 5.39 0.00
 6 34 14 3.83 0.00
 6 36 0 24.45 0.00
 6 36 1 -4.20 0.00
 6 36 2 -7.28 0.00
 6 36 3 5.71 0.00
 6 36 4 11.17 0.00
 6 36 5 1.65 0.00
 6 36 6 -1.35 0.00
 6 36 7 -2.06 0.00
 6 36 8 7.07 0.00
 6 36 9 3.01 0.00
 6 36 10 6.70 0.00
 6 36 11 -3.95 0.00
 6 36 12 -2.45 0.00
 6 36 13 3.99 0.00
 6 38 0 -5.88 0.00
 6 38 1 9.51 0.00
 6 38 2 5.59 0.00
 6 38 3 5.22 0.00
 6 38 4 1.38 0.00
 6 38 5 -3.54 0.00
 6 38 6 -0.27 0.00
 6 38 7 6.10 0.00
 6 38 8 5.16 0.00
 6 38 9 -1.67 0.00
 6 38 10 -1.92 0.00
 6 38 11 4.74 0.00
 6 40 0 -2.74 0.00
 6 40 1 -6.67 0.00
 6 40 2 3.83 0.00
 6 40 3 -2.18 0.00
 6 40 4 -0.75 0.00
 6 40 5 5.13 0.00
 6 40 6 4.23 0.00
 6 40 7 -1.81 0.00
 6 40 8 0.28 0.00
 6 40 9 -2.63 0.00
 6 40 10 7.27 0.00
 6 42 0 10.19 0.00
 6 42 1 11.33 0.00
 6 42 2 -5.49 0.00
 6 42 3 -6.67 0.00
 6 42 4 4.69 0.00
 6 42 5 4.77 0.00
 6 42 6 12.22 0.00
 6 42 7 -0.32 0.00
 6 42 8 -0.52 0.00
 6 42 9 -2.94 0.00
 6 44 0 -4.79 0.00
 6 44 1 -0.73 0.00
 6 44 2 7.74 0.00
 6 44 3 -2.25 0.00
 6 44 4 -2.33 0.00
 6 44 5 0.52 0.00
 6 44 6 3.23 0.00
 6 44 7 3.55 0.00
 6 44 8 -1.90 0.00
 6 46 0 -3.25 0.00
 6 46 1 5.67 0.00
 6 46 2 -2.19 0.00
 6 46 3 -0.55 0.00
 6 46 4 3.50 0.00
 6 46 5 4.12 0.00
 6 46 6 -2.28 0.00
 7 1 1 40.97 0.00
 7 1 2 46.07 0.00
 7 1 3 -12.28 0.00
 7 1 4 -23.51 0.00
 7 1 5 24.00 0.00
 7 1 6 36.10 0.00
 7 1 7 -12.66 0.00
 7 1 8 13.98 0.00
 7 1 9 2.42 0.00
 7 1 10 12.42 0.00
 7 1 11 -4.47 0.00
 7 1 12 0.18 0.00
 7 1 13 10.43 0.00
 7 1 14 4.01 0.00
 7 1 15 0.68 0.00
 7 1 16 -0.16 0.00
 7 1 17 0.00 0.00
 7 1 18 8.42 0.00
 7 1 19 -8.97 0.00
 7 1 20 -3.12 0.00
 7 3 1 70.29 0.00
 7 3 2 -23.50 0.00
 7 3 3 6.05 0.00
 7 3 4 1.01 0.00
 7 3 5 -4.19 0.00
 7 3 6 -14.84 0.00
 7 3 7 -18.62 0.00
 7 3 8 -9.30 0.00
 7 3 9 9.29 0.00
 7 3 10 2.12 0.00
 7 3 11 -5.13 0.00
 7 3 12 -7.03 0.00
 7 3 13 -4.10 0.00
 7 3 14 -2.83 0.00
 7 3 15 0.00 0.00
 7 3 16 -6.53 0.00
 7 3 17 0.50 0.00
 7 3 18 0.76 0.00
 7 3 19 4.36 0.00
 7 3 20 -6.00 0.00
 7 5 1 -45.24 0.00
 7 5 2 -17.43 0.00
 7 5 3 -25.92 0.00
 7 5 4 11.54 0.00
 7 5 5 5.20 0.00
 7 5 6 20.54 0.00
 7 5 7 12.66 0.00
 7 5 8 -15.24 0.00
 7 5 9 -17.18 0.00
 7 5 10 -2.84 0.00
 7 5 11 2.94 0.00
 7 5 12 0.50 0.00
 7 5 13 3.29 0.00
 7 5 14 3.55 0.00
 7 5 15 1.21 0.00
 7 5 16 -2.02 0.00
 7 5 17 -13.23 0.00
 7 5 18 -7.19 0.00
 7 5 19 -2.53 0.00
 7 5 20 -2.07 0.00
 7 7 1 40.91 0.00
 7 7 2 14.03 0.00
 7 7 3 -14.84 0.00
 7 7 4 5.09 0.00
 7 7 5 -5.42 0.00
 7 7 6 -5.69 0.00
 7 7 7 -12.88 0.00
 7 7 8 7.33 0.00
 7 7 9 -4.91 0.00
 7 7 10 17.99 0.00
 7 7 11 4.27 0.00
 7 7 12 1.73 0.00
 7 7 13 -12.85 0.00
 7 7 14 8.66 0.00
 7 7 15 8.58 0.00
 7 7 16 0.83 0.00
 7 7 17 -1.40 0.00
 7 7 18 9.86 0.00
 7 7 19 4.68 0.00
 7 7 20 -0.24 0.00
 7 9 1 6.12 0.00
 7 9 2 -2.65 0.00
 7 9 3 -30.80 0.00
 7 9 4 -19.06 0.00
 7 9 5 10.59 0.00
 7 9 6 -15.79 0.00
 7 9 7 -28.22 0.00
 7 9 8 -13.90 0.00
 7 9 9 11.44 0.00
 7 9 10 1.22 0.00
 7 9 11 -0.29 0.00
 7 9 12 -11.38 0.00
 7 9 13 -6.50 0.00
 7 9 14 -2.19 0.00
 7 9 15 -0.61 0.00
 7 9 16 -8.70 0.00
 7 9 17 -0.96 0.00
 7 9 18 -2.58 0.00
 7 9 19 -2.10 0.00
 7 11 1 15.84 0.00
 7 11 2 6.24 0.00
 7 11 3 -33.24 0.00
 7 11 4 -5.00 0.00
 7 11 5 -1.14 0.00
 7 11 6 13.23 0.00
 7 11 7 6.63 0.00
 7 11 8 15.61 0.00
 7 11 9 0.75 0.00
 7 11 10 -8.93 0.00
 7 11 11 -2.93 0.00
 7 11 12 21.39 0.00
 7 11 13 -5.69 0.00
 7 11 14 -0.28 0.00
 7 11 15 0.02 0.00
 7 11 16 1.77 0.00
 7 11 17 -0.51 0.00
 7 11 18 1.84 0.00
 7 11 19 -1.57 0.00
 7 13 1 -25.48 0.00
 7 13 2 2.46 0.00
 7 13 3 31.31 0.00
 7 13 4 -8.42 0.00
 7 13 5 -9.96 0.00
 7 13 6 6.08 0.00
 7 13 7 -2.48 0.00
 7 13 8 -3.35 0.00
 7 13 9 4.23 0.00
 7 13 10 -7.13 0.00
 7 13 11 -8.63 0.00
 7 13 12 0.50 0.00
 7 13 13 0.69 0.00
 7 13 14 -5.83 0.00
 7 13 15 -1.62 0.00
 7 13 16 4.70 0.00
 7 13 17 -0.46 0.00
 7 13 18 -1.66 0.00
 7 13 19 -2.92 0.00
 7 15 1 -9.97 0.00
 7 15 2 -12.29 0.00
 7 15 3 -8.20 0.00
 7 15 4 9.01 0.00
 7 15 5 -22.56 0.00
 7 15 6 -17.44 0.00
 7 15 7 3.22 0.00
 7 15 8 -4.30 0.00
 7 15 9 2.07 0.00
 7 15 10 8.77 0.00
 7 15 11 -0.81 0.00
 7 15 12 -5.11 0.00
 7 15 13 -7.91 0.00
 7 15 14 -4.01 0.00
 7 15 15 -3.02 0.00
 7 15 16 0.95 0.00
 7 15 17 5.92 0.00
 7 15 18 -4.55 0.00
 7 15 19 3.74 0.00
 7 17 1 30.12 0.00
 7 17 2 4.75 0.00
 7 17 3 -12.02 0.00
 7 17 4 1.76 0.00
 7 17 5 14.27 0.00
 7 17 6 17.48 0.00
 7 17 7 5.73 0.00
 7 17 8 -0.66 0.00
 7 17 9 -3.35 0.00
 7 17 10 1.70 0.00
 7 17 11 -5.18 0.00
 7 17 12 1.05 0.00
 7 17 13 2.09 0.00
 7 17 14 10.55 0.00
 7 17 15 -1.08 0.00
 7 17 16 -0.36 0.00
 7 17 17 -2.46 0.00
 7 17 18 3.81 0.00
 7 19 1 -0.57 0.00
 7 19 2 -19.22 0.00
 7 19 3 4.09 0.00
 7 19 4 -0.07 0.00
 7 19 5 -7.26 0.00
 7 19 6 -7.14 0.00
 7 19 7 -15.44 0.00
 7 19 8 -5.98 0.00
 7 19 9 8.63 0.00
 7 19 10 4.62 0.00
 7 19 11 1.55 0.00
 7 19 12 -11.58 0.00
 7 19 13 0.20 0.00
 7 19 14 -0.56 0.00
 7 19 15 0.93 0.00
 7 19 16 2.61 0.00
 7 19 17 3.64 0.00
 7 19 18 1.71 0.00
 7 21 1 -24.44 0.00
 7 21 2 -4.91 0.00
 7 21 3 19.42 0.00
 7 21 4 6.39 0.00
 7 21 5 -6.26 0.00
 7 21 6 0.36 0.00
 7 21 7 22.58 0.00
 7 21 8 8.04 0.00
 7 21 9 -13.30 0.00
 7 21 10 -10.41 0.00
 7 21 11 1.31 0.00
 7 21 12 6.41 0.00
 7 21 13 2.40 0.00
 7 21 14 -6.46 0.00
 7 21 15 1.30 0.00
 7 21 16 -0.31 0.00
 7 21 17 -3.72 0.00
 7 21 18 -9.44 0.00
 7 23 1 5.41 0.00
 7 23 2 0.31 0.00
 7 23 3 -4.90 0.00
 7 23 4 -8.74 0.00
 7 23 5 3.37 0.00
 7 23 6 8.02 0.00
 7 23 7 4.71 0.00
 7 23 8 8.60 0.00
 7 23 9 -8.50 0.00
 7 23 10 0.94 0.00
 7 23 11 13.09 0.00
 7 23 12 5.04 0.00
 7 23 13 -10.83 0.00
 7 23 14 7.53 0.00
 7 23 15 2.57 0.00
 7 23 16 7.89 0.00
 7 23 17 -4.54 0.00
 7 25 1 -3.31 0.00
 7 25 2 -6.97 0.00
 7 25 3 -6.64 0.00
 7 25 4 -1.82 0.00
 7 25 5 8.46 0.00
 7 25 6 -3.67 0.00
 7 25 7 -9.86 0.00
 7 25 8 4.85 0.00
 7 25 9 -3.60 0.00
 7 25 10 -5.49 0.00
 7 25 11 13.24 0.00
 7 25 12 -12.26 0.00
 7 25 13 1.14 0.00
 7 25 14 -1.43 0.00
 7 25 15 3.77 0.00
 7 25 16 -6.73 0.00
 7 25 17 9.79 0.00
 7 27 1 -4.66 0.00
 7 27 2 -0.80 0.00
 7 27 3 3.76 0.00
 7 27 4 -4.32 0.00
 7 27 5 4.84 0.00
 7 27 6 0.90 0.00
 7 27 7 3.45 0.00
 7 27 8 9.27 0.00
 7 27 9 0.99 0.00
 7 27 10 -3.68 0.00
 7 27 11 -1.31 0.00
 7 27 12 9.54 0.00
 7 27 13 -0.34 0.00
 7 27 14 2.06 0.00
 7 27 15 -2.10 0.00
 7 27 16 3.99 0.00
 7 29 1 -5.28 0.00
 7 29 2 3.66 0.00
 7 29 3 -2.62 0.00
 7 29 4 0.99 0.00
 7 29 5 -2.01 0.00
 7 29 6 3.37 0.00
 7 29 7 -5.23 0.00
 7 29 8 -3.04 0.00
 7 29 9 0.35 0.00
 7 29 10 -5.59 0.00
 7 29 11 -0.09 0.00
 7 29 12 -1.15 0.00
 7 29 13 -0.45 0.00
 7 29 14 0.23 0.00
 7 29 15 -1.16 0.00
 7 29 16 -1.66 0.00
 7 31 1 4.01 0.00
 7 31 2 -1.97 0.00
 7 31 3 -5.34 0.00
 7 31 4 -7.46 0.00
 7 31 5 9.61 0.00
 7 31 6 1.39 0.00
 7 31 7 -6.55 0.00
 7 31 8 -3.08 0.00
 7 31 9 2.15 0.00
 7 31 10 0.20 0.00
 7 31 11 -4.39 0.00
 7 31 12 -3.79 0.00
 7 31 13 2.15 0.00
 7 31 14 -8.89 0.00
 7 31 15 -1.29 0.00
 7 33 1 1.61 0.00
 7 33 2 5.10 0.00
 7 33 3 -6.12 0.00
 7 33 4 5.78 0.00
 7 33 5 2.48 0.00
 7 33 6 2.21 0.00
 7 33 7 -2.32 0.00
 7 33 8 -1.29 0.00
 7 33 9 1.65 0.00
 7 33 10 1.14 0.00
 7 33 11 -4.00 0.00
 7 33 12 4.18 0.00
 7 33 13 -4.67 0.00
 7 33 14 -1.28 0.00
 7 35 1 -13.34 0.00
 7 35 2 7.77 0.00
 7 35 3 4.82 0.00
 7 35 4 -5.46 0.00
 7 35 5 4.31 0.00
 7 35 6 3.03 0.00
 7 35 7 -1.91 0.00
 7 35 8 -8.78 0.00
 7 35 9 -3.85 0.00
 7 35 10 -2.20 0.00
 7 35 11 1.18 0.00
 7 35 12 0.21 0.00
 7 35 13 -4.55 0.00
 7 37 1 6.37 0.00
 7 37 2 -7.74 0.00
 7 37 3 0.26 0.00
 7 37 4 -0.73 0.00
 7 37 5 -4.18 0.00
 7 37 6 -1.42 0.00
 7 37 7 6.19 0.00
 7 37 8 4.47 0.00
 7 37 9 -5.95 0.00
 7 37 10 -1.39 0.00
 7 37 11 0.49 0.00
 7 39 1 -6.81 0.00
 7 39 2 7.96 0.00
 7 39 3 0.40 0.00
 7 39 4 3.04 0.00
 7 39 5 -2.07 0.00
 7 39 6 0.41 0.00
 7 39 7 -5.33 0.00
 7 39 8 -1.91 0.00
 7 39 9 -0.56 0.00
 7 39 10 -0.65 0.00
 7 41 1 3.43 0.00
 7 41 2 -2.51 0.00
 7 41 3 1.36 0.00
 7 41 4 -2.76 0.00
 7 41 5 2.34 0.00
 7 41 6 4.40 0.00
 7 41 7 -2.79 0.00
 7 41 8 -5.15 0.00
 7 41 9 1.06 0.00
 7 41 10 -13.34 0.00
 7 43 1 5.07 0.00
 7 43 2 7.92 0.00
 7 43 3 -4.21 0.00
 7 43 4 -4.74 0.00
 7 43 5 -7.26 0.00
 7 43 6 1.71 0.00
 7 43 7 1.25 0.00
 7 43 8 -3.97 0.00
 7 45 1 -5.90 0.00
 7 45 2 -2.05 0.00
 7 45 3 4.89 0.00
 7 45 4 0.22 0.00
 7 45 5 2.63 0.00
 7 45 6 9.85 0.00
 7 45 7 -7.23 0.00
 7 47 1 -0.03 0.00
 7 47 2 -4.46 0.00
 7 47 3 -1.75 0.00
 8 0 0 242.59 0.00
 8 0 1 21.20 0.00
 8 0 2 68.77 0.00
 8 0 3 23.96 0.00
 8 0 4 -1.95 0.00
 8 0 5 -4.16 0.00
 8 0 6 -3.85 0.00
 8 0 7 -2.85 0.00
 8 0 8 18.28 0.00
 8 0 9 -17.07 0.00
 8 0 10 -8.74 0.00
 8 0 11 -23.90 0.00
 8 0 12 -15.23 0.00
 8 0 13 -15.56 0.00
 8 0 14 -6.44 0.00
 8 0 15 10.30 0.00
 8 0 16 -4.30 0.00
 8 0 17 4.51 0.00
 8 0 18 -4.17 0.00
 8 0 19 8.28 0.00
 8 0 20 10.78 0.00
 8 2 0 22.84 0.00
 8 2 1 11.41 0.00
 8 2 2 7.61 0.00
 8 2 3 9.47 0.00
 8 2 4 31.79 0.00
 8 2 5 5.04 0.00
 8 2 6 -2.12 0.00
 8 2 7 -0.39 0.00
 8 2 8 -10.35 0.00
 8 2 9 -4.95 0.00
 8 2 10 -4.41 0.00
 8 2 11 -3.22 0.00
 8 2 12 -1.58 0.00
 8 2 13 -0.53 0.00
 8 2 14 4.01 0.00
 8 2 15 -7.35 0.00
 8 2 16 2.84 0.00
 8 2 17 -1.20 0.00
 8 2 18 8.06 0.00
 8 2 19 -1.07 0.00
 8 2 20 -2.54 0.00
 8 4 0 73.94 0.00
 8 4 1 30.93 0.00
 8 4 2 5.52 0.00
 8 4 3 26.63 0.00
 8 4 4 17.75 0.00
 8 4 5 16.82 0.00
 8 4 6 -0.17 0.00
 8 4 7 -17.19 0.00
 8 4 8 1.69 0.00
 8 4 9 1.21 0.00
 8 4 10 2.02 0.00
 8 4 11 -6.12 0.00
 8 4 12 -8.13 0.00
 8 4 13 -7.74 0.00
 8 4 14 -9.70 0.00
 8 4 15 -3.74 0.00
 8 4 16 -1.84 0.00
 8 4 17 3.21 0.00
 8 4 18 5.33 0.00
 8 4 19 2.60 0.00
 8 4 20 11.43 0.00
 8 6 0 41.85 0.00
 8 6 1 25.56 0.00
 8 6 2 52.41 0.00
 8 6 3 -6.10 0.00
 8 6 4 1.79 0.00
 8 6 5 -9.27 0.00
 8 6 6 0.35 0.00
 8 6 7 14.18 0.00
 8 6 8 8.58 0.00
 8 6 9 0.75 0.00
 8 6 10 -1.25 0.00
 8 6 11 -1.10 0.00
 8 6 12 -8.19 0.00
 8 6 13 -0.75 0.00
 8 6 14 7.61 0.00
 8 6 15 5.48 0.00
 8 6 16 2.24 0.00
 8 6 17 4.02 0.00
 8 6 18 0.14 0.00
 8 6 19 0.43 0.00
 8 8 0 -39.27 0.00
 8 8 1 28.79 0.00
 8 8 2 -4.99 0.00
 8 8 3 5.01 0.00
 8 8 4 -8.01 0.00
 8 8 5 9.02 0.00
 8 8 6 -7.51 0.00
 8 8 7 3.25 0.00
 8 8 8 3.63 0.00
 8 8 9 -3.70 0.00
 8 8 10 4.90 0.00
 8 8 11 2.12 0.00
 8 8 12 6.02 0.00
 8 8 13 2.74 0.00
 8 8 14 -6.73 0.00
 8 8 15 -12.63 0.00
 8 8 16 0.67 0.00
 8 8 17 5.27 0.00
 8 8 18 6.47 0.00
 8 8 19 1.55 0.00
 8 10 0 53.50 0.00
 8 10 1 10.69 0.00
 8 10 2 49.53 0.00
 8 10 3 16.66 0.00
 8 10 4 5.15 0.00
 8 10 5 0.11 0.00
 8 10 6 14.53 0.00
 8 10 7 -15.48 0.00
 8 10 8 3.63 0.00
 8 10 9 0.84 0.00
 8 10 10 4.68 0.00
 8 10 11 -1.58 0.00
 8 10 12 -9.86 0.00
 8 10 13 -3.97 0.00
 8 10 14 2.29 0.00
 8 10 15 3.64 0.00
 8 10 16 -3.01 0.00
 8 10 17 2.51 0.00
 8 10 18 0.08 0.00
 8 10 19 2.33 0.00
 8 12 0 0.58 0.00
 8 12 1 21.26 0.00
 8 12 2 7.45 0.00
 8 12 3 -2.37 0.00
 8 12 4 12.15 0.00
 8 12 5 0.67 0.00
 8 12 6 -4.87 0.00
 8 12 7 -8.02 0.00
 8 12 8 2.69 0.00
 8 12 9 3.51 0.00
 8 12 10 6.50 0.00
 8 12 11 4.15 0.00
 8 12 12 2.65 0.00
 8 12 13 0.38 0.00
 8 12 14 1.05 0.00
 8 12 15 4.93 0.00
 8 12 16 2.75 0.00
 8 12 17 2.78 0.00
 8 12 18 4.55 0.00
 8 12 19 -1.41 0.00
 8 14 0 25.88 0.00
 8 14 1 9.37 0.00
 8 14 2 -9.28 0.00
 8 14 3 17.43 0.00
 8 14 4 -12.93 0.00
 8 14 5 -5.55 0.00
 8 14 6 12.61 0.00
 8 14 7 12.16 0.00
 8 14 8 -1.68 0.00
 8 14 9 11.47 0.00
 8 14 10 -0.72 0.00
 8 14 11 1.29 0.00
 8 14 12 9.05 0.00
 8 14 13 -2.53 0.00
 8 14 14 -0.79 0.00
 8 14 15 -1.22 0.00
 8 14 16 5.30 0.00
 8 14 17 6.70 0.00
 8 14 18 2.87 0.00
 8 14 19 -0.62 0.00
 8 16 0 8.96 0.00
 8 16 1 2.28 0.00
 8 16 2 37.60 0.00
 8 16 3 12.10 0.00
 8 16 4 0.14 0.00
 8 16 5 -12.79 0.00
 8 16 6 15.96 0.00
 8 16 7 12.44 0.00
 8 16 8 3.39 0.00
 8 16 9 -4.40 0.00
 8 16 10 3.35 0.00
 8 16 11 14.17 0.00
 8 16 12 -2.51 0.00
 8 16 13 -2.94 0.00
 8 16 14 -4.04 0.00
 8 16 15 5.89 0.00
 8 16 16 1.06 0.00
 8 16 17 -0.09 0.00
 8 16 18 -0.69 0.00
 8 18 0 2.61 0.00
 8 18 1 -3.91 0.00
 8 18 2 -18.33 0.00
 8 18 3 -0.25 0.00
 8 18 4 -9.66 0.00
 8 18 5 -3.86 0.00
 8 18 6 1.92 0.00
 8 18 7 24.31 0.00
 8 18 8 0.29 0.00
 8 18 9 3.89 0.00
 8 18 10 8.59 0.00
 8 18 11 8.41 0.00
 8 18 12 6.39 0.00
 8 18 13 7.62 0.00
 8 18 14 4.40 0.00
 8 18 15 8.43 0.00
 8 18 16 5.87 0.00
 8 18 17 1.83 0.00
 8 18 18 -3.37 0.00
 8 20 0 25.38 0.00
 8 20 1 4.66 0.00
 8 20 2 -18.43 0.00
 8 20 3 -6.11 0.00
 8 20 4 10.77 0.00
 8 20 5 3.02 0.00
 8 20 6 -9.25 0.00
 8 20 7 -6.15 0.00
 8 20 8 8.29 0.00
 8 20 9 13.14 0.00
 8 20 10 3.56 0.00
 8 20 11 -1.78 0.00
 8 20 12 9.10 0.00
 8 20 13 0.04 0.00
 8 20 14 1.90 0.00
 8 20 15 -6.97 0.00
 8 20 16 -3.16 0.00
 8 20 17 -3.94 0.00
 8 20 18 2.87 0.00
 8 22 0 -10.21 0.00
 8 22 1 -7.94 0.00
 8 22 2 5.75 0.00
 8 22 3 -4.97 0.00
 8 22 4 1.70 0.00
 8 22 5 4.92 0.00
 8 22 6 11.65 0.00
 8 22 7 6.44 0.00
 8 22 8 -6.42 0.00
 8 22 9 4.11 0.00
 8 22 10 10.23 0.00
 8 22 11 9.65 0.00
 8 22 12 -3.55 0.00
 8 22 13 8.23 0.00
 8 22 14 9.21 0.00
 8 22 15 4.21 0.00
 8 22 16 -0.61 0.00
 8 22 17 -1.39 0.00
 8 24 0 -12.66 0.00
 8 24 1 -6.98 0.00
 8 24 2 -2.73 0.00
 8 24 3 -0.02 0.00
 8 24 4 -27.63 0.00
 8 24 5 -10.02 0.00
 8 24 6 2.00 0.00
 8 24 7 8.05 0.00
 8 24 8 2.67 0.00
 8 24 9 6.73 0.00
 8 24 10 12.15 0.00
 8 24 11 0.47 0.00
 8 24 12 6.39 0.00
 8 24 13 5.97 0.00
 8 24 14 3.28 0.00
 8 24 15 1.81 0.00
 8 24 16 1.20 0.00
 8 24 17 0.97 0.00
 8 26 0 4.95 0.00
 8 26 1 -4.53 0.00
 8 26 2 -3.37 0.00
 8 26 3 1.96 0.00
 8 26 4 21.30 0.00
 8 26 5 4.62 0.00
 8 26 6 -1.79 0.00
 8 26 7 1.49 0.00
 8 26 8 4.13 0.00
 8 26 9 10.99 0.00
 8 26 10 -3.01 0.00
 8 26 11 -3.94 0.00
 8 26 12 1.97 0.00
 8 26 13 2.98 0.00
 8 26 14 3.23 0.00
 8 26 15 -6.28 0.00
 8 26 16 -5.66 0.00
 8 28 0 -3.74 0.00
 8 28 1 -7.32 0.00
 8 28 2 -6.23 0.00
 8 28 3 -6.20 0.00
 8 28 4 -3.66 0.00
 8 28 5 3.22 0.00
 8 28 6 14.04 0.00
 8 28 7 6.44 0.00
 8 28 8 -4.65 0.00
 8 28 9 5.44 0.00
 8 28 10 8.36 0.00
 8 28 11 13.65 0.00
 8 28 12 4.22 0.00
 8 28 13 5.27 0.00
 8 28 14 -2.07 0.00
 8 28 15 3.78 0.00
 8 28 16 -1.07 0.00
 8 30 0 -11.71 0.00
 8 30 1 4.42 0.00
 8 30 2 3.60 0.00
 8 30 3 -0.96 0.00
 8 30 4 -7.66 0.00
 8 30 5 2.58 0.00
 8 30 6 3.78 0.00
 8 30 7 8.23 0.00
 8 30 8 4.81 0.00
 8 30 9 2.67 0.00
 8 30 10 12.62 0.00
 8 30 11 -2.18 0.00
 8 30 12 5.35 0.00
 8 30 13 -1.90 0.00
 8 30 14 7.10 0.00
 8 30 15 -1.40 0.00
 8 32 0 -5.71 0.00
 8 32 1 -5.90 0.00
 8 32 2 6.03 0.00
 8 32 3 0.89 0.00
 8 32 4 16.35 0.00
 8 32 5 2.94 0.00
 8 32 6 -1.08 0.00
 8 32 7 -0.96 0.00
 8 32 8 0.89 0.00
 8 32 9 10.32 0.00
 8 32 10 10.30 0.00
 8 32 11 7.59 0.00
 8 32 12 -6.50 0.00
 8 32 13 6.62 0.00
 8 32 14 5.22 0.00
 8 34 0 1.78 0.00
 8 34 1 2.00 0.00
 8 34 2 -6.99 0.00
 8 34 3 -6.98 0.00
 8 34 4 -3.99 0.00
 8 34 5 3.93 0.00
 8 34 6 -2.97 0.00
 8 34 7 2.41 0.00
 8 34 8 6.47 0.00
 8 34 9 -1.70 0.00
 8 34 10 9.65 0.00
 8 34 11 6.10 0.00
 8 34 12 13.36 0.00
 8 34 13 3.40 0.00
 8 36 0 -4.60 0.00
 8 36 1 -3.89 0.00
 8 36 2 8.45 0.00
 8 36 3 4.66 0.00
 8 36 4 1.47 0.00
 8 36 5 0.34 0.00
 8 36 6 1.61 0.00
 8 36 7 6.20 0.00
 8 36 8 2.99 0.00
 8 36 9 4.84 0.00
 8 36 10 -0.79 0.00
 8 36 11 -4.91 0.00
 8 36 12 6.15 0.00
 8 38 0 0.40 0.00
 8 38 1 2.12 0.00
 8 38 2 -5.57 0.00
 8 38 3 -6.74 0.00
 8 38 4 3.89 0.00
 8 38 5 2.53 0.00
 8 38 6 -0.26 0.00
 8 38 7 -2.26 0.00
 8 38 8 11.35 0.00
 8 38 9 4.43 0.00
 8 38 10 7.16 0.00
 8 38 11 0.85 0.00
 8 40 0 6.02 0.00
 8 40 1 -0.42 0.00
 8 40 2 -1.04 0.00
 8 40 3 4.74 0.00
 8 40 4 4.33 0.00
 8 40 5 0.37 0.00
 8 40 6 5.29 0.00
 8 40 7 4.41 0.00
 8 40 8 -3.65 0.00
 8 40 9 -1.29 0.00
 8 40 10 6.60 0.00
 8 42 0 -4.21 0.00
 8 42 1 0.95 0.00
 8 42 2 6.21 0.00
 8 42 3 -3.26 0.00
 8 42 4 1.93 0.00
 8 42 5 -3.57 0.00
 8 42 6 7.67 0.00
 8 42 7 1.63 0.00
 8 42 8 2.34 0.00
 8 44 0 7.76 0.00
 8 44 1 6.72 0.00
 8 44 2 -0.57 0.00
 8 44 3 -3.04 0.00
 8 44 4 6.03 0.00
 8 44 5 13.79 0.00
 8 44 6 0.01 0.00
 8 44 7 2.31 0.00
 8 46 0 -3.18 0.00
 8 46 1 4.91 0.00
 8 46 2 3.39 0.00
 8 46 3 -2.60 0.00
 8 46 4 0.08 0.00
 9 1 1 21.15 0.00
 9 1 2 -2.60 0.00
 9 1 3 64.15 0.00
 9 1 4 35.64 0.00
 9 1 5 -25.13 0.00
 9 1 6 -12.61 0.00
 9 1 7 -4.95 0.00
 9 1 8 7.41 0.00
 9 1 9 3.26 0.00
 9 1 10 12.96 0.00
 9 1 11 9.59 0.00
 9 1 12 -6.34 0.00
 9 1 13 -9.39 0.00
 9 1 14 -7.28 0.00
 9 1 15 4.47 0.00
 9 1 16 3.24 0.00
 9 1 17 1.75 0.00
 9 1 18 -3.02 0.00
 9 1 19 10.68 0.00
 9 3 1 -26.42 0.00
 9 3 2 -17.71 0.00
 9 3 3 -9.79 0.00
 9 3 4 -7.14 0.00
 9 3 5 -1.46 0.00
 9 3 6 -6.74 0.00
 9 3 7 1.47 0.00
 9 3 8 1.54 0.00
 9 3 9 -17.06 0.00
 9 3 10 -7.36 0.00
 9 3 11 -4.44 0.00
 9 3 12 -2.44 0.00
 9 3 13 3.10 0.00
 9 3 14 8.06 0.00
 9 3 15 5.15 0.00
 9 3 16 0.06 0.00
 9 3 17 -4.01 0.00
 9 3 18 -3.11 0.00
 9 3 19 -3.26 0.00
 9 5 1 40.02 0.00
 9 5 2 -21.96 0.00
 9 5 3 -29.76 0.00
 9 5 4 12.75 0.00
 9 5 5 -11.42 0.00
 9 5 6 -4.66 0.00
 9 5 7 -16.90 0.00
 9 5 8 -10.22 0.00
 9 5 9 -2.39 0.00
 9 5 10 -5.74 0.00
 9 5 11 0.15 0.00
 9 5 12 4.11 0.00
 9 5 13 7.31 0.00
 9 5 14 -0.15 0.00
 9 5 15 -4.70 0.00
 9 5 16 -9.35 0.00
 9 5 17 -0.05 0.00
 9 5 18 1.57 0.00
 9 5 19 -1.08 0.00
 9 7 1 -2.10 0.00
 9 7 2 -5.32 0.00
 9 7 3 -7.86 0.00
 9 7 4 -10.65 0.00
 9 7 5 9.56 0.00
 9 7 6 -1.82 0.00
 9 7 7 -14.68 0.00
 9 7 8 -17.05 0.00
 9 7 9 -3.81 0.00
 9 7 10 13.53 0.00
 9 7 11 -3.86 0.00
 9 7 12 -1.33 0.00
 9 7 13 -11.54 0.00
 9 7 14 11.88 0.00
 9 7 15 5.71 0.00
 9 7 16 11.46 0.00
 9 7 17 0.98 0.00
 9 7 18 6.98 0.00
 9 7 19 5.98 0.00
 9 9 1 5.49 0.00
 9 9 2 1.30 0.00
 9 9 3 -26.68 0.00
 9 9 4 -30.21 0.00
 9 9 5 -26.18 0.00
 9 9 6 -22.78 0.00
 9 9 7 -12.82 0.00
 9 9 8 -16.08 0.00
 9 9 9 -13.69 0.00
 9 9 10 -8.43 0.00
 9 9 11 4.77 0.00
 9 9 12 -1.98 0.00
 9 9 13 0.75 0.00
 9 9 14 0.08 0.00
 9 9 15 7.41 0.00
 9 9 16 -6.95 0.00
 9 9 17 -1.13 0.00
 9 9 18 -4.19 0.00
 9 9 19 -2.07 0.00
 9 11 1 -12.92 0.00
 9 11 2 -18.11 0.00
 9 11 3 -2.56 0.00
 9 11 4 -11.76 0.00
 9 11 5 -0.67 0.00
 9 11 6 -0.57 0.00
 9 11 7 -20.98 0.00
 9 11 8 -4.91 0.00
 9 11 9 1.87 0.00
 9 11 10 2.29 0.00
 9 11 11 0.19 0.00
 9 11 12 7.82 0.00
 9 11 13 -3.70 0.00
 9 11 14 4.43 0.00
 9 11 15 -0.79 0.00
 9 11 16 5.20 0.00
 9 11 17 3.20 0.00
 9 11 18 3.90 0.00
 9 11 19 5.58 0.00
 9 13 1 12.05 0.00
 9 13 2 -8.10 0.00
 9 13 3 -31.19 0.00
 9 13 4 -12.76 0.00
 9 13 5 -5.02 0.00
 9 13 6 -14.12 0.00
 9 13 7 -18.25 0.00
 9 13 8 -7.29 0.00
 9 13 9 1.61 0.00
 9 13 10 -13.05 0.00
 9 13 11 -2.60 0.00
 9 13 12 4.40 0.00
 9 13 13 5.07 0.00
 9 13 14 5.58 0.00
 9 13 15 2.02 0.00
 9 13 16 3.93 0.00
 9 13 17 3.79 0.00
 9 13 18 1.36 0.00
 9 15 1 0.22 0.00
 9 15 2 -9.48 0.00
 9 15 3 -9.40 0.00
 9 15 4 -20.76 0.00
 9 15 5 -23.27 0.00
 9 15 6 -12.07 0.00
 9 15 7 -8.02 0.00
 9 15 8 -12.77 0.00
 9 15 9 -6.97 0.00
 9 15 10 -0.83 0.00
 9 15 11 -10.53 0.00
 9 15 12 0.09 0.00
 9 15 13 2.51 0.00
 9 15 14 2.85 0.00
 9 15 15 1.46 0.00
 9 15 16 0.87 0.00
 9 15 17 7.77 0.00
 9 15 18 0.37 0.00
 9 17 1 -20.18 0.00
 9 17 2 -18.69 0.00
 9 17 3 12.37 0.00
 9 17 4 7.23 0.00
 9 17 5 -24.26 0.00
 9 17 6 -13.74 0.00
 9 17 7 -2.62 0.00
 9 17 8 -8.58 0.00
 9 17 9 3.11 0.00
 9 17 10 6.86 0.00
 9 17 11 -2.76 0.00
 9 17 12 9.79 0.00
 9 17 13 3.97 0.00
 9 17 14 4.08 0.00
 9 17 15 2.22 0.00
 9 17 16 12.61 0.00
 9 17 17 -1.85 0.00
 9 17 18 -1.01 0.00
 9 19 1 6.75 0.00
 9 19 2 -11.27 0.00
 9 19 3 -16.08 0.00
 9 19 4 -17.11 0.00
 9 19 5 -5.12 0.00
 9 19 6 -11.31 0.00
 9 19 7 -7.87 0.00
 9 19 8 -9.76 0.00
 9 19 9 -12.11 0.00
 9 19 10 -7.46 0.00
 9 19 11 2.87 0.00
 9 19 12 -7.08 0.00
 9 19 13 5.88 0.00
 9 19 14 3.48 0.00
 9 19 15 6.12 0.00
 9 19 16 3.24 0.00
 9 19 17 5.17 0.00
 9 21 1 7.55 0.00
 9 21 2 -7.16 0.00
 9 21 3 -12.69 0.00
 9 21 4 -8.08 0.00
 9 21 5 3.82 0.00
 9 21 6 -13.67 0.00
 9 21 7 -13.41 0.00
 9 21 8 -4.40 0.00
 9 21 9 1.10 0.00
 9 21 10 9.53 0.00
 9 21 11 12.75 0.00
 9 21 12 0.65 0.00
 9 21 13 2.96 0.00
 9 21 14 3.49 0.00
 9 21 15 1.25 0.00
 9 21 16 -1.77 0.00
 9 21 17 -7.11 0.00
 9 23 1 -26.80 0.00
 9 23 2 -8.71 0.00
 9 23 3 2.90 0.00
 9 23 4 -2.72 0.00
 9 23 5 -4.63 0.00
 9 23 6 -4.68 0.00
 9 23 7 5.48 0.00
 9 23 8 9.40 0.00
 9 23 9 -9.88 0.00
 9 23 10 -7.11 0.00
 9 23 11 -1.94 0.00
 9 23 12 7.70 0.00
 9 23 13 1.45 0.00
 9 23 14 7.53 0.00
 9 23 15 4.90 0.00
 9 23 16 2.71 0.00
 9 23 17 -4.69 0.00
 9 25 1 -4.96 0.00
 9 25 2 -2.06 0.00
 9 25 3 6.10 0.00
 9 25 4 -15.05 0.00
 9 25 5 -16.87 0.00
 9 25 6 -8.91 0.00
 9 25 7 -2.64 0.00
 9 25 8 1.22 0.00
 9 25 9 0.50 0.00
 9 25 10 -9.18 0.00
 9 25 11 16.17 0.00
 9 25 12 -0.21 0.00
 9 25 13 3.54 0.00
 9 25 14 -1.70 0.00
 9 25 15 5.31 0.00
 9 25 16 -1.43 0.00
 9 27 1 -2.01 0.00
 9 27 2 2.36 0.00
 9 27 3 -8.69 0.00
 9 27 4 4.27 0.00
 9 27 5 11.43 0.00
 9 27 6 1.46 0.00
 9 27 7 -1.82 0.00
 9 27 8 3.89 0.00
 9 27 9 -10.16 0.00
 9 27 10 4.42 0.00
 9 27 11 10.10 0.00
 9 27 12 3.45 0.00
 9 27 13 -6.04 0.00
 9 27 14 2.69 0.00
 9 27 15 -0.46 0.00
 9 27 16 8.38 0.00
 9 29 1 3.44 0.00
 9 29 2 -4.49 0.00
 9 29 3 -9.15 0.00
 9 29 4 -4.91 0.00
 9 29 5 5.36 0.00
 9 29 6 -1.11 0.00
 9 29 7 -2.28 0.00
 9 29 8 -3.66 0.00
 9 29 9 1.21 0.00
 9 29 10 -1.88 0.00
 9 29 11 -1.65 0.00
 9 29 12 -0.17 0.00
 9 29 13 2.12 0.00
 9 29 14 -3.12 0.00
 9 29 15 0.88 0.00
 9 31 1 3.64 0.00
 9 31 2 14.95 0.00
 9 31 3 3.27 0.00
 9 31 4 3.71 0.00
 9 31 5 -1.70 0.00
 9 31 6 -0.37 0.00
 9 31 7 0.59 0.00
 9 31 8 2.42 0.00
 9 31 9 4.88 0.00
 9 31 10 1.88 0.00
 9 31 11 -0.17 0.00
 9 31 12 -2.46 0.00
 9 31 13 4.33 0.00
 9 31 14 1.85 0.00
 9 33 1 -6.49 0.00
 9 33 2 -1.22 0.00
 9 33 3 -0.99 0.00
 9 33 4 8.32 0.00
 9 33 5 11.60 0.00
 9 33 6 2.71 0.00
 9 33 7 -0.02 0.00
 9 33 8 3.68 0.00
 9 33 9 -2.50 0.00
 9 33 10 3.20 0.00
 9 33 11 -2.49 0.00
 9 33 12 3.87 0.00
 9 33 13 -5.60 0.00
 9 35 1 7.39 0.00
 9 35 2 5.09 0.00
 9 35 3 -0.68 0.00
 9 35 4 4.21 0.00
 9 35 5 4.30 0.00
 9 35 6 4.04 0.00
 9 35 7 0.50 0.00
 9 35 8 1.90 0.00
 9 35 9 9.13 0.00
 9 35 10 -1.24 0.00
 9 35 11 2.10 0.00
 9 35 12 7.21 0.00
 9 37 1 -3.91 0.00
 9 37 2 0.13 0.00
 9 37 3 5.58 0.00
 9 37 4 2.03 0.00
 9 37 5 9.77 0.00
 9 37 6 6.62 0.00
 9 37 7 3.77 0.00
 9 37 8 2.31 0.00
 9 37 9 -1.58 0.00
 9 37 10 10.94 0.00
 9 37 11 5.09 0.00
 9 39 1 2.70 0.00
 9 39 2 3.85 0.00
 9 39 3 2.33 0.00
 9 39 4 5.20 0.00
 9 39 5 0.27 0.00
 9 39 6 6.59 0.00
 9 39 7 0.09 0.00
 9 39 8 3.06 0.00
 9 39 9 5.89 0.00
 9 39 10 3.44 0.00
 9 41 1 2.36 0.00
 9 41 2 1.78 0.00
 9 41 3 2.43 0.00
 9 41 4 4.98 0.00
 9 41 5 3.14 0.00
 9 41 6 5.91 0.00
 9 41 7 5.29 0.00
 9 41 8 5.98 0.00
 9 41 9 -0.68 0.00
 9 43 1 0.76 0.00
 9 43 2 3.29 0.00
 9 43 3 6.19 0.00
 9 43 4 6.47 0.00
 9 43 5 1.58 0.00
 9 43 6 3.52 0.00
 9 43 7 3.53 0.00
 9 45 1 1.58 0.00
 9 45 2 1.63 0.00
 9 45 3 2.43 0.00
 9 45 4 -1.80 0.00
 9 45 5 -2.87 0.00
 10 0 0 89.81 0.00
 10 0 1 35.45 0.00
 10 0 2 24.58 0.00
 10 0 3 -18.10 0.00
 10 0 4 14.70 0.00
 10 0 5 -2.27 0.00
 10 0 6 2.93 0.00
 10 0 7 -10.11 0.00
 10 0 8 -1.80 0.00
 10 0 9 -17.31 0.00
 10 0 10 -5.43 0.00
 10 0 11 -29.21 0.00
 10 0 12 -6.13 0.00
 10 0 13 0.10 0.00
 10 0 14 -0.32 0.00
 10 0 15 9.15 0.00
 10 0 16 -1.65 0.00
 10 0 17 3.77 0.00
 10 0 18 0.23 0.00
 10 0 19 9.42 0.00
 10 2 0 74.86 0.00
 10 2 1 6.94 0.00
 10 2 2 -12.11 0.00
 10 2 3 21.48 0.00
 10 2 4 9.88 0.00
 10 2 5 10.26 0.00
 10 2 6 -19.53 0.00
 10 2 7 -9.53 0.00
 10 2 8 -9.87 0.00
 10 2 9 -1.66 0.00
 10 2 10 -14.70 0.00
 10 2 11 -8.91 0.00
 10 2 12 -7.19 0.00
 10 2 13 -8.42 0.00
 10 2 14 0.50 0.00
 10 2 15 -8.04 0.00
 10 2 16 -3.77 0.00
 10 2 17 -7.38 0.00
 10 2 18 2.46 0.00
 10 2 19 -8.36 0.00
 10 4 0 4.86 0.00
 10 4 1 21.46 0.00
 10 4 2 7.03 0.00
 10 4 3 4.71 0.00
 10 4 4 13.12 0.00
 10 4 5 -9.92 0.00
 10 4 6 -6.66 0.00
 10 4 7 -11.77 0.00
 10 4 8 4.21 0.00
 10 4 9 -10.16 0.00
 10 4 10 -4.16 0.00
 10 4 11 -8.04 0.00
 10 4 12 -14.89 0.00
 10 4 13 -6.53 0.00
 10 4 14 -0.64 0.00
 10 4 15 2.27 0.00
 10 4 16 -3.28 0.00
 10 4 17 6.91 0.00
 10 4 18 4.53 0.00
 10 4 19 0.20 0.00
 10 6 0 25.73 0.00
 10 6 1 23.95 0.00
 10 6 2 36.87 0.00
 10 6 3 -6.33 0.00
 10 6 4 -1.71 0.00
 10 6 5 1.99 0.00
 10 6 6 -5.59 0.00
 10 6 7 -4.80 0.00
 10 6 8 -14.69 0.00
 10 6 9 -5.32 0.00
 10 6 10 -8.49 0.00
 10 6 11 -6.28 0.00
 10 6 12 -2.63 0.00
 10 6 13 1.56 0.00
 10 6 14 -1.88 0.00
 10 6 15 -7.52 0.00
 10 6 16 -4.54 0.00
 10 6 17 -1.95 0.00
 10 6 18 -1.47 0.00
 10 6 19 -14.94 0.00
 10 8 0 -17.10 0.00
 10 8 1 7.55 0.00
 10 8 2 14.80 0.00
 10 8 3 3.75 0.00
 10 8 4 -28.54 0.00
 10 8 5 -20.07 0.00
 10 8 6 -8.52 0.00
 10 8 7 -0.83 0.00
 10 8 8 0.01 0.00
 10 8 9 -10.94 0.00
 10 8 10 -0.59 0.00
 10 8 11 -3.70 0.00
 10 8 12 -10.23 0.00
 10 8 13 -9.21 0.00
 10 8 14 -1.99 0.00
 10 8 15 0.65 0.00
 10 8 16 2.45 0.00
 10 8 17 2.11 0.00
 10 8 18 1.01 0.00
 10 8 19 6.24 0.00
 10 10 0 16.70 0.00
 10 10 1 17.43 0.00
 10 10 2 14.30 0.00
 10 10 3 -0.43 0.00
 10 10 4 15.41 0.00
 10 10 5 4.79 0.00
 10 10 6 -7.34 0.00
 10 10 7 -10.51 0.00
 10 10 8 -7.41 0.00
 10 10 9 -17.48 0.00
 10 10 10 0.89 0.00
 10 10 11 2.36 0.00
 10 10 12 -14.67 0.00
 10 10 13 -4.80 0.00
 10 10 14 -10.46 0.00
 10 10 15 -5.23 0.00
 10 10 16 -6.48 0.00
 10 10 17 -4.39 0.00
 10 10 18 -5.03 0.00
 10 12 0 12.47 0.00
 10 12 1 -3.91 0.00
 10 12 2 18.57 0.00
 10 12 3 2.35 0.00
 10 12 4 -22.78 0.00
 10 12 5 -12.04 0.00
 10 12 6 9.39 0.00
 10 12 7 -11.16 0.00
 10 12 8 -3.33 0.00
 10 12 9 -2.64 0.00
 10 12 10 -1.65 0.00
 10 12 11 -4.85 0.00
 10 12 12 1.75 0.00
 10 12 13 -1.08 0.00
 10 12 14 3.53 0.00
 10 12 15 -3.07 0.00
 10 12 16 -4.58 0.00
 10 12 17 0.31 0.00
 10 12 18 2.69 0.00
 10 14 0 -24.23 0.00
 10 14 1 7.73 0.00
 10 14 2 -4.16 0.00
 10 14 3 2.75 0.00
 10 14 4 -18.42 0.00
 10 14 5 -2.81 0.00
 10 14 6 0.28 0.00
 10 14 7 -4.76 0.00
 10 14 8 -12.27 0.00
 10 14 9 2.06 0.00
 10 14 10 -3.76 0.00
 10 14 11 1.03 0.00
 10 14 12 -8.76 0.00
 10 14 13 -9.38 0.00
 10 14 14 -3.16 0.00
 10 14 15 1.15 0.00
 10 14 16 3.53 0.00
 10 14 17 2.24 0.00
 10 14 18 0.99 0.00
 10 16 0 44.93 0.00
 10 16 1 -6.42 0.00
 10 16 2 -8.44 0.00
 10 16 3 -9.45 0.00
 10 16 4 10.39 0.00
 10 16 5 -7.44 0.00
 10 16 6 2.81 0.00
 10 16 7 3.23 0.00
 10 16 8 4.98 0.00
 10 16 9 -2.35 0.00
 10 16 10 -3.99 0.00
 10 16 11 9.37 0.00
 10 16 12 5.47 0.00
 10 16 13 -3.96 0.00
 10 16 14 -11.26 0.00
 10 16 15 1.18 0.00
 10 16 16 -0.78 0.00
 10 16 17 -2.38 0.00
 10 18 0 -19.05 0.00
 10 18 1 -8.71 0.00
 10 18 2 -21.19 0.00
 10 18 3 -1.41 0.00
 10 18 4 -11.91 0.00
 10 18 5 -3.76 0.00
 10 18 6 -20.05 0.00
 10 18 7 -0.88 0.00
 10 18 8 7.13 0.00
 10 18 9 0.47 0.00
 10 18 10 3.36 0.00
 10 18 11 -0.09 0.00
 10 18 12 1.89 0.00
 10 18 13 4.16 0.00
 10 18 14 2.73 0.00
 10 18 15 3.12 0.00
 10 18 16 3.10 0.00
 10 18 17 2.58 0.00
 10 20 0 -16.51 0.00
 10 20 1 -7.62 0.00
 10 20 2 4.09 0.00
 10 20 3 -10.94 0.00
 10 20 4 -13.88 0.00
 10 20 5 -10.25 0.00
 10 20 6 11.02 0.00
 10 20 7 15.48 0.00
 10 20 8 -11.05 0.00
 10 20 9 -3.10 0.00
 10 20 10 6.23 0.00
 10 20 11 6.10 0.00
 10 20 12 -6.37 0.00
 10 20 13 -5.77 0.00
 10 20 14 -2.34 0.00
 10 20 15 -0.24 0.00
 10 20 16 -2.02 0.00
 10 20 17 -4.09 0.00
 10 22 0 7.10 0.00
 10 22 1 -13.48 0.00
 10 22 2 -11.44 0.00
 10 22 3 -10.69 0.00
 10 22 4 -4.08 0.00
 10 22 5 1.49 0.00
 10 22 6 -9.95 0.00
 10 22 7 -8.49 0.00
 10 22 8 8.53 0.00
 10 22 9 3.33 0.00
 10 22 10 -8.93 0.00
 10 22 11 3.76 0.00
 10 22 12 15.80 0.00
 10 22 13 9.24 0.00
 10 22 14 4.80 0.00
 10 22 15 -0.61 0.00
 10 22 16 -0.02 0.00
 10 22 17 -0.31 0.00
 10 24 0 -8.75 0.00
 10 24 1 -10.60 0.00
 10 24 2 -28.08 0.00
 10 24 3 -8.35 0.00
 10 24 4 -4.25 0.00
 10 24 5 6.79 0.00
 10 24 6 -7.79 0.00
 10 24 7 0.80 0.00
 10 24 8 6.83 0.00
 10 24 9 10.28 0.00
 10 24 10 -0.71 0.00
 10 24 11 -5.71 0.00
 10 24 12 -1.50 0.00
 10 24 13 2.90 0.00
 10 24 14 -0.31 0.00
 10 24 15 -1.90 0.00
 10 24 16 -0.20 0.00
 10 26 0 -2.22 0.00
 10 26 1 -13.16 0.00
 10 26 2 4.96 0.00
 10 26 3 -9.09 0.00
 10 26 4 -3.32 0.00
 10 26 5 -6.99 0.00
 10 26 6 13.84 0.00
 10 26 7 2.94 0.00
 10 26 8 -14.06 0.00
 10 26 9 -1.47 0.00
 10 26 10 8.27 0.00
 10 26 11 3.86 0.00
 10 26 12 0.14 0.00
 10 26 13 -4.29 0.00
 10 26 14 -3.27 0.00
 10 26 15 -0.04 0.00
 10 26 16 -2.29 0.00
 10 28 0 -33.02 0.00
 10 28 1 -12.29 0.00
 10 28 2 -8.29 0.00
 10 28 3 2.31 0.00
 10 28 4 -5.91 0.00
 10 28 5 -1.45 0.00
 10 28 6 -1.75 0.00
 10 28 7 8.85 0.00
 10 28 8 5.13 0.00
 10 28 9 15.97 0.00
 10 28 10 -2.10 0.00
 10 28 11 0.45 0.00
 10 28 12 -0.55 0.00
 10 28 13 2.51 0.00
 10 28 14 4.10 0.00
 10 28 15 -1.06 0.00
 10 30 0 -4.11 0.00
 10 30 1 -2.70 0.00
 10 30 2 -9.06 0.00
 10 30 3 -15.02 0.00
 10 30 4 4.80 0.00
 10 30 5 2.41 0.00
 10 30 6 3.60 0.00
 10 30 7 -5.50 0.00
 10 30 8 1.19 0.00
 10 30 9 -2.72 0.00
 10 30 10 13.44 0.00
 10 30 11 -3.42 0.00
 10 30 12 -4.63 0.00
 10 30 13 -7.32 0.00
 10 30 14 -2.78 0.00
 10 32 0 -5.26 0.00
 10 32 1 -6.64 0.00
 10 32 2 -6.78 0.00
 10 32 3 -5.56 0.00
 10 32 4 -5.51 0.00
 10 32 5 -3.21 0.00
 10 32 6 -2.24 0.00
 10 32 7 5.66 0.00
 10 32 8 -1.25 0.00
 10 32 9 1.06 0.00
 10 32 10 -5.89 0.00
 10 32 11 7.49 0.00
 10 32 12 5.23 0.00
 10 32 13 1.07 0.00
 10 34 0 -23.57 0.00
 10 34 1 -9.00 0.00
 10 34 2 4.27 0.00
 10 34 3 -11.17 0.00
 10 34 4 -4.41 0.00
 10 34 5 0.37 0.00
 10 34 6 -0.96 0.00
 10 34 7 -1.19 0.00
 10 34 8 4.88 0.00
 10 34 9 -1.70 0.00
 10 34 10 4.42 0.00
 10 34 11 -0.17 0.00
 10 34 12 -1.53 0.00
 10 36 0 0.43 0.00
 10 36 1 -4.77 0.00
 10 36 2 -11.03 0.00
 10 36 3 -9.88 0.00
 10 36 4 -2.86 0.00
 10 36 5 2.00 0.00
 10 36 6 -1.59 0.00
 10 36 7 0.59 0.00
 10 36 8 -5.99 0.00
 10 36 9 -1.77 0.00
 10 36 10 3.30 0.00
 10 38 0 -6.12 0.00
 10 38 1 -6.42 0.00
 10 38 2 -5.27 0.00
 10 38 3 -5.07 0.00
 10 38 4 2.66 0.00
 10 38 5 -4.51 0.00
 10 38 6 -2.98 0.00
 10 38 7 -0.09 0.00
 10 38 8 3.06 0.00
 10 38 9 5.33 0.00
 10 38 10 -1.49 0.00
 10 40 0 -6.53 0.00
 10 40 1 -5.03 0.00
 10 40 2 -4.60 0.00
 10 40 3 -8.69 0.00
 10 40 4 -0.74 0.00
 10 40 5 2.01 0.00
 10 40 6 0.93 0.00
 10 40 7 1.53 0.00
 10 40 8 8.17 0.00
 10 40 9 -0.07 0.00
 10 42 0 7.31 0.00
 10 42 1 -0.77 0.00
 10 42 2 -2.28 0.00
 10 42 3 -3.79 0.00
 10 42 4 0.52 0.00
 10 42 5 0.60 0.00
 10 42 6 4.63 0.00
 10 42 7 -1.38 0.00
 10 44 0 -9.80 0.00
 10 44 1 -4.93 0.00
 10 44 2 4.64 0.00
 10 44 3 0.51 0.00
 10 44 4 3.34 0.00
 10 44 5 0.43 0.00
 11 1 1 -25.95 0.00
 11 1 2 11.67 0.00
 11 1 3 -2.64 0.00
 11 1 4 -10.21 0.00
 11 1 5 9.68 0.00
 11 1 6 6.90 0.00
 11 1 7 -3.17 0.00
 11 1 8 11.08 0.00
 11 1 9 4.02 0.00
 11 1 10 -9.02 0.00
 11 1 11 -3.99 0.00
 11 1 12 -12.55 0.00
 11 1 13 12.34 0.00
 11 1 14 -2.06 0.00
 11 1 15 3.25 0.00
 11 1 16 3.09 0.00
 11 1 17 8.93 0.00
 11 1 18 4.56 0.00
 11 1 19 11.26 0.00
 11 3 1 42.78 0.00
 11 3 2 -17.54 0.00
 11 3 3 12.69 0.00
 11 3 4 14.47 0.00
 11 3 5 -8.25 0.00
 11 3 6 -3.37 0.00
 11 3 7 -1.92 0.00
 11 3 8 -2.10 0.00
 11 3 9 -4.70 0.00
 11 3 10 6.54 0.00
 11 3 11 -7.10 0.00
 11 3 12 7.76 0.00
 11 3 13 -2.60 0.00
 11 3 14 3.52 0.00
 11 3 15 -2.13 0.00
 11 3 16 -4.64 0.00
 11 3 17 -3.55 0.00
 11 3 18 -7.83 0.00
 11 3 19 -11.33 0.00
 11 5 1 -21.59 0.00
 11 5 2 -12.55 0.00
 11 5 3 -20.08 0.00
 11 5 4 -4.48 0.00
 11 5 5 -1.90 0.00
 11 5 6 5.80 0.00
 11 5 7 -4.69 0.00
 11 5 8 -10.51 0.00
 11 5 9 -2.77 0.00
 11 5 10 -0.30 0.00
 11 5 11 16.00 0.00
 11 5 12 -3.12 0.00
 11 5 13 -6.84 0.00
 11 5 14 -1.34 0.00
 11 5 15 4.72 0.00
 11 5 16 1.43 0.00
 11 5 17 -1.87 0.00
 11 5 18 -1.54 0.00
 11 7 1 8.00 0.00
 11 7 2 -1.82 0.00
 11 7 3 16.77 0.00
 11 7 4 7.99 0.00
 11 7 5 -7.32 0.00
 11 7 6 -4.01 0.00
 11 7 7 8.06 0.00
 11 7 8 2.70 0.00
 11 7 9 -6.70 0.00
 11 7 10 -2.41 0.00
 11 7 11 -4.16 0.00
 11 7 12 9.41 0.00
 11 7 13 -0.30 0.00
 11 7 14 4.88 0.00
 11 7 15 1.59 0.00
 11 7 16 0.79 0.00
 11 7 17 -4.12 0.00
 11 7 18 1.02 0.00
 11 9 1 0.02 0.00
 11 9 2 -4.90 0.00
 11 9 3 -10.21 0.00
 11 9 4 -13.12 0.00
 11 9 5 1.23 0.00
 11 9 6 -9.63 0.00
 11 9 7 -11.09 0.00
 11 9 8 -9.38 0.00
 11 9 9 8.10 0.00
 11 9 10 -3.03 0.00
 11 9 11 -1.91 0.00
 11 9 12 -2.59 0.00
 11 9 13 -0.82 0.00
 11 9 14 -2.44 0.00
 11 9 15 -2.96 0.00
 11 9 16 -5.27 0.00
 11 9 17 1.56 0.00
 11 9 18 1.38 0.00
 11 11 1 27.37 0.00
 11 11 2 13.52 0.00
 11 11 3 -24.59 0.00
 11 11 4 -12.86 0.00
 11 11 5 10.27 0.00
 11 11 6 9.95 0.00
 11 11 7 -7.51 0.00
 11 11 8 -1.49 0.00
 11 11 9 -4.73 0.00
 11 11 10 1.71 0.00
 11 11 11 15.87 0.00
 11 11 12 3.89 0.00
 11 11 13 -4.83 0.00
 11 11 14 3.90 0.00
 11 11 15 -1.17 0.00
 11 11 16 0.12 0.00
 11 11 17 -0.26 0.00
 11 11 18 -4.23 0.00
 11 13 1 -7.58 0.00
 11 13 2 -12.33 0.00
 11 13 3 11.26 0.00
 11 13 4 -5.62 0.00
 11 13 5 -3.55 0.00
 11 13 6 0.31 0.00
 11 13 7 -0.21 0.00
 11 13 8 -0.52 0.00
 11 13 9 7.01 0.00
 11 13 10 1.05 0.00
 11 13 11 -5.61 0.00
 11 13 12 -3.05 0.00
 11 13 13 2.14 0.00
 11 13 14 2.42 0.00
 11 13 15 0.70 0.00
 11 13 16 4.16 0.00
 11 13 17 3.84 0.00
 11 13 18 -0.40 0.00
 11 15 1 -4.18 0.00
 11 15 2 -6.17 0.00
 11 15 3 -9.58 0.00
 11 15 4 2.74 0.00
 11 15 5 -6.90 0.00
 11 15 6 -2.64 0.00
 11 15 7 -4.78 0.00
 11 15 8 -4.18 0.00
 11 15 9 7.38 0.00
 11 15 10 2.45 0.00
 11 15 11 -11.15 0.00
 11 15 12 -0.51 0.00
 11 15 13 3.45 0.00
 11 15 14 -2.61 0.00
 11 15 15 -3.49 0.00
 11 15 16 -2.94 0.00
 11 15 17 3.33 0.00
 11 17 1 17.86 0.00
 11 17 2 -3.29 0.00
 11 17 3 -2.14 0.00
 11 17 4 -3.74 0.00
 11 17 5 10.05 0.00
 11 17 6 -3.93 0.00
 11 17 7 4.33 0.00
 11 17 8 -0.62 0.00
 11 17 9 6.39 0.00
 11 17 10 4.77 0.00
 11 17 11 -12.80 0.00
 11 17 12 4.04 0.00
 11 17 13 3.42 0.00
 11 17 14 6.85 0.00
 11 17 15 -6.14 0.00
 11 17 16 6.49 0.00
 11 17 17 0.00 0.00
 11 19 1 -5.96 0.00
 11 19 2 -7.09 0.00
 11 19 3 3.98 0.00
 11 19 4 7.26 0.00
 11 19 5 -11.49 0.00
 11 19 6 -6.85 0.00
 11 19 7 -0.23 0.00
 11 19 8 2.95 0.00
 11 19 9 3.29 0.00
 11 19 10 -0.06 0.00
 11 19 11 2.05 0.00
 11 19 12 -10.44 0.00
 11 19 13 3.10 0.00
 11 19 14 -8.44 0.00
 11 19 15 2.66 0.00
 11 19 16 -5.53 0.00
 11 19 17 2.39 0.00
 11 21 1 -10.93 0.00
 11 21 2 -0.37 0.00
 11 21 3 3.62 0.00
 11 21 4 -7.99 0.00
 11 21 5 0.81 0.00
 11 21 6 -8.53 0.00
 11 21 7 15.16 0.00
 11 21 8 6.09 0.00
 11 21 9 -11.99 0.00
 11 21 10 -1.49 0.00
 11 21 11 9.66 0.00
 11 21 12 2.83 0.00
 11 21 13 -2.53 0.00
 11 21 14 0.92 0.00
 11 21 15 -2.56 0.00
 11 21 16 4.07 0.00
 11 23 1 1.04 0.00
 11 23 2 1.36 0.00
 11 23 3 -1.87 0.00
 11 23 4 -0.24 0.00
 11 23 5 5.94 0.00
 11 23 6 2.89 0.00
 11 23 7 -2.10 0.00
 11 23 8 0.21 0.00
 11 23 9 6.12 0.00
 11 23 10 1.84 0.00
 11 23 11 -0.45 0.00
 11 23 12 -1.26 0.00
 11 23 13 -2.62 0.00
 11 23 14 -3.69 0.00
 11 23 15 4.96 0.00
 11 23 16 4.30 0.00
 11 25 1 -6.39 0.00
 11 25 2 -1.73 0.00
 11 25 3 -7.52 0.00
 11 25 4 -1.54 0.00
 11 25 5 2.54 0.00
 11 25 6 -0.45 0.00
 11 25 7 1.01 0.00
 11 25 8 4.72 0.00
 11 25 9 -3.11 0.00
 11 25 10 -3.65 0.00
 11 25 11 2.96 0.00
 11 25 12 -4.89 0.00
 11 25 13 -0.30 0.00
 11 25 14 -0.11 0.00
 11 25 15 -3.22 0.00
 11 27 1 1.01 0.00
 11 27 2 0.63 0.00
 11 27 3 9.15 0.00
 11 27 4 -3.13 0.00
 11 27 5 0.38 0.00
 11 27 6 4.50 0.00
 11 27 7 5.87 0.00
 11 27 8 0.59 0.00
 11 27 9 -1.37 0.00
 11 27 10 -2.14 0.00
 11 27 11 0.54 0.00
 11 27 12 -4.81 0.00
 11 27 13 -1.93 0.00
 11 27 14 0.85 0.00
 11 27 15 1.18 0.00
 11 29 1 -6.64 0.00
 11 29 2 2.28 0.00
 11 29 3 -5.33 0.00
 11 29 4 11.51 0.00
 11 29 5 1.58 0.00
 11 29 6 -5.36 0.00
 11 29 7 1.88 0.00
 11 29 8 0.04 0.00
 11 29 9 -3.48 0.00
 11 29 10 -0.67 0.00
 11 29 11 -9.53 0.00
 11 29 12 -2.37 0.00
 11 29 13 -4.44 0.00
 11 29 14 -3.55 0.00
 11 31 1 6.11 0.00
 11 31 2 3.73 0.00
 11 31 3 -4.17 0.00
 11 31 4 -2.55 0.00
 11 31 5 10.85 0.00
 11 31 6 3.88 0.00
 11 31 7 1.80 0.00
 11 31 8 2.78 0.00
 11 31 9 -2.99 0.00
 11 31 10 -3.17 0.00
 11 31 11 9.53 0.00
 11 31 12 -1.40 0.00
 11 31 13 -1.70 0.00
 11 33 1 10.70 0.00
 11 33 2 7.30 0.00
 11 33 3 -0.17 0.00
 11 33 4 14.14 0.00
 11 33 5 1.61 0.00
 11 33 6 -0.59 0.00
 11 33 7 -3.45 0.00
 11 33 8 0.97 0.00
 11 33 9 3.45 0.00
 11 33 10 5.03 0.00
 11 33 11 -18.50 0.00
 11 33 12 -7.54 0.00
 11 35 1 -11.36 0.00
 11 35 2 -4.97 0.00
 11 35 3 3.15 0.00
 11 35 4 2.14 0.00
 11 35 5 6.15 0.00
 11 35 6 5.07 0.00
 11 35 7 2.39 0.00
 11 35 8 2.79 0.00
 11 35 9 -1.56 0.00
 11 35 10 -3.30 0.00
 11 37 1 6.04 0.00
 11 37 2 1.77 0.00
 11 37 3 2.81 0.00
 11 37 4 0.53 0.00
 11 37 5 -1.46 0.00
 11 37 6 5.00 0.00
 11 37 7 6.48 0.00
 11 37 8 1.53 0.00
 11 37 9 2.72 0.00
 11 37 10 6.64 0.00
 11 39 1 -1.16 0.00
 11 39 2 -0.80 0.00
 11 39 3 -1.34 0.00
 11 39 4 2.83 0.00
 11 39 5 9.41 0.00
 11 39 6 8.55 0.00
 11 39 7 2.50 0.00
 11 39 8 -1.26 0.00
 11 39 9 -10.66 0.00
 11 41 1 -3.49 0.00
 11 41 2 0.62 0.00
 11 41 3 3.39 0.00
 11 41 4 5.65 0.00
 11 41 5 -3.25 0.00
 11 41 6 1.44 0.00
 11 41 7 -1.03 0.00
 11 43 1 4.44 0.00
 11 43 2 -2.03 0.00
 11 43 3 6.45 0.00
 11 43 4 5.74 0.00
 11 43 5 1.88 0.00
 12 0 0 40.55 0.00
 12 0 1 -6.81 0.00
 12 0 2 1.86 0.00
 12 0 3 -0.26 0.00
 12 0 4 12.03 0.00
 12 0 5 9.57 0.00
 12 0 6 -11.98 0.00
 12 0 7 5.02 0.00
 12 0 8 8.80 0.00
 12 0 9 1.63 0.00
 12 0 10 -9.22 0.00
 12 0 11 -7.18 0.00
 12 0 12 5.28 0.00
 12 0 13 10.64 0.00
 12 0 14 3.68 0.00
 12 0 15 7.44 0.00
 12 0 16 -6.26 0.00
 12 0 17 2.01 0.00
 12 0 18 -4.54 0.00
 12 2 0 24.27 0.00
 12 2 1 -4.14 0.00
 12 2 2 -28.27 0.00
 12 2 3 -5.08 0.00
 12 2 4 -6.65 0.00
 12 2 5 -11.13 0.00
 12 2 6 -1.77 0.00
 12 2 7 -5.00 0.00
 12 2 8 -1.41 0.00
 12 2 9 9.77 0.00
 12 2 10 10.59 0.00
 12 2 11 -4.03 0.00
 12 2 12 -2.42 0.00
 12 2 13 -7.52 0.00
 12 2 14 4.58 0.00
 12 2 15 -3.50 0.00
 12 2 16 0.11 0.00
 12 2 17 -6.56 0.00
 12 2 18 8.34 0.00
 12 4 0 -18.48 0.00
 12 4 1 -5.24 0.00
 12 4 2 -1.40 0.00
 12 4 3 -4.77 0.00
 12 4 4 1.70 0.00
 12 4 5 8.40 0.00
 12 4 6 -2.04 0.00
 12 4 7 -0.27 0.00
 12 4 8 4.68 0.00
 12 4 9 6.84 0.00
 12 4 10 0.39 0.00
 12 4 11 2.24 0.00
 12 4 12 -1.51 0.00
 12 4 13 7.49 0.00
 12 4 14 -4.30 0.00
 12 4 15 1.92 0.00
 12 4 16 -2.63 0.00
 12 4 17 1.47 0.00
 12 4 18 -5.60 0.00
 12 6 0 17.70 0.00
 12 6 1 2.04 0.00
 12 6 2 8.07 0.00
 12 6 3 -8.02 0.00
 12 6 4 -2.99 0.00
 12 6 5 -16.15 0.00
 12 6 6 -9.84 0.00
 12 6 7 -7.08 0.00
 12 6 8 6.10 0.00
 12 6 9 -0.27 0.00
 12 6 10 -0.23 0.00
 12 6 11 -1.20 0.00
 12 6 12 2.87 0.00
 12 6 13 -1.96 0.00
 12 6 14 2.46 0.00
 12 6 15 -2.90 0.00
 12 6 16 -1.37 0.00
 12 6 17 0.23 0.00
 12 6 18 4.31 0.00
 12 8 0 -20.51 0.00
 12 8 1 -4.84 0.00
 12 8 2 -9.51 0.00
 12 8 3 -15.90 0.00
 12 8 4 -1.93 0.00
 12 8 5 3.65 0.00
 12 8 6 -9.20 0.00
 12 8 7 3.48 0.00
 12 8 8 -3.66 0.00
 12 8 9 -2.59 0.00
 12 8 10 8.18 0.00
 12 8 11 9.48 0.00
 12 8 12 -12.37 0.00
 12 8 13 3.37 0.00
 12 8 14 2.26 0.00
 12 8 15 -1.63 0.00
 12 8 16 -3.39 0.00
 12 8 17 -0.94 0.00
 12 8 18 -0.46 0.00
 12 10 0 -6.80 0.00
 12 10 1 -1.27 0.00
 12 10 2 28.58 0.00
 12 10 3 3.62 0.00
 12 10 4 -27.06 0.00
 12 10 5 -11.70 0.00
 12 10 6 6.12 0.00
 12 10 7 -0.23 0.00
 12 10 8 -0.76 0.00
 12 10 9 -5.13 0.00
 12 10 10 12.84 0.00
 12 10 11 7.38 0.00
 12 10 12 -13.08 0.00
 12 10 13 -7.10 0.00
 12 10 14 -1.60 0.00
 12 10 15 -2.29 0.00
 12 10 16 -6.49 0.00
 12 10 17 -3.81 0.00
 12 10 18 -2.55 0.00
 12 12 0 -4.37 0.00
 12 12 1 -11.50 0.00
 12 12 2 -1.96 0.00
 12 12 3 -1.03 0.00
 12 12 4 0.94 0.00
 12 12 5 -2.99 0.00
 12 12 6 3.28 0.00
 12 12 7 -1.44 0.00
 12 12 8 -1.53 0.00
 12 12 9 -6.71 0.00
 12 12 10 0.00 0.00
 12 12 11 6.85 0.00
 12 12 12 4.51 0.00
 12 12 13 -5.42 0.00
 12 12 14 -3.73 0.00
 12 12 15 -0.97 0.00
 12 12 16 2.54 0.00
 12 12 17 0.18 0.00
 12 14 0 5.27 0.00
 12 14 1 -1.04 0.00
 12 14 2 -17.35 0.00
 12 14 3 -5.51 0.00
 12 14 4 -7.29 0.00
 12 14 5 0.14 0.00
 12 14 6 -6.11 0.00
 12 14 7 -1.43 0.00
 12 14 8 5.01 0.00
 12 14 9 5.35 0.00
 12 14 10 -6.64 0.00
 12 14 11 6.76 0.00
 12 14 12 -1.65 0.00
 12 14 13 -3.01 0.00
 12 14 14 -2.97 0.00
 12 14 15 0.21 0.00
 12 14 16 -2.76 0.00
 12 14 17 1.78 0.00
 12 16 0 -6.78 0.00
 12 16 1 -2.67 0.00
 12 16 2 15.76 0.00
 12 16 3 1.59 0.00
 12 16 4 -9.94 0.00
 12 16 5 -7.33 0.00
 12 16 6 1.12 0.00
 12 16 7 -5.98 0.00
 12 16 8 2.80 0.00
 12 16 9 2.74 0.00
 12 16 10 0.26 0.00
 12 16 11 -2.17 0.00
 12 16 12 -0.88 0.00
 12 16 13 -4.41 0.00
 12 16 14 0.36 0.00
 12 16 15 -0.59 0.00
 12 16 16 -1.45 0.00
 12 16 17 -8.20 0.00
 12 18 0 -3.60 0.00
 12 18 1 0.87 0.00
 12 18 2 -12.30 0.00
 12 18 3 -9.23 0.00
 12 18 4 -7.37 0.00
 12 18 5 0.08 0.00
 12 18 6 4.29 0.00
 12 18 7 3.11 0.00
 12 18 8 -5.27 0.00
 12 18 9 -7.23 0.00
 12 18 10 4.30 0.00
 12 18 11 6.95 0.00
 12 18 12 -0.31 0.00
 12 18 13 3.90 0.00
 12 18 14 -8.85 0.00
 12 18 15 4.05 0.00
 12 18 16 -1.66 0.00
 12 20 0 11.00 0.00
 12 20 1 -2.04 0.00
 12 20 2 -10.37 0.00
 12 20 3 -3.51 0.00
 12 20 4 4.22 0.00
 12 20 5 -0.51 0.00
 12 20 6 -25.08 0.00
 12 20 7 -5.83 0.00
 12 20 8 7.24 0.00
 12 20 9 0.58 0.00
 12 20 10 -6.32 0.00
 12 20 11 -1.79 0.00
 12 20 12 3.56 0.00
 12 20 13 -1.96 0.00
 12 20 14 -2.23 0.00
 12 20 15 -10.50 0.00
 12 20 16 3.39 0.00
 12 22 0 3.23 0.00
 12 22 1 4.68 0.00
 12 22 2 3.36 0.00
 12 22 3 0.26 0.00
 12 22 4 -1.09 0.00
 12 22 5 -3.17 0.00
 12 22 6 -0.84 0.00
 12 22 7 -1.88 0.00
 12 22 8 -3.03 0.00
 12 22 9 3.14 0.00
 12 22 10 -8.99 0.00
 12 22 11 -1.70 0.00
 12 22 12 -0.02 0.00
 12 22 13 -0.07 0.00
 12 22 14 -1.57 0.00
 12 22 15 11.44 0.00
 12 22 16 -8.34 0.00
 12 24 0 4.79 0.00
 12 24 1 -5.65 0.00
 12 24 2 0.82 0.00
 12 24 3 -4.17 0.00
 12 24 4 -12.34 0.00
 12 24 5 0.17 0.00
 12 24 6 2.21 0.00
 12 24 7 -0.98 0.00
 12 24 8 -13.44 0.00
 12 24 9 -10.30 0.00
 12 24 10 3.63 0.00
 12 24 11 0.90 0.00
 12 24 12 3.60 0.00
 12 24 13 -1.89 0.00
 12 24 14 0.29 0.00
 12 24 15 -9.50 0.00
 12 26 0 1.53 0.00
 12 26 1 2.91 0.00
 12 26 2 1.03 0.00
 12 26 3 4.95 0.00
 12 26 4 0.16 0.00
 12 26 5 0.41 0.00
 12 26 6 -4.62 0.00
 12 26 7 -1.22 0.00
 12 26 8 0.14 0.00
 12 26 9 9.88 0.00
 12 26 10 -7.21 0.00
 12 26 11 -7.31 0.00
 12 26 12 -6.01 0.00
 12 26 13 2.69 0.00
 12 26 14 -3.57 0.00
 12 26 15 0.58 0.00
 12 28 0 9.44 0.00
 12 28 1 2.16 0.00
 12 28 2 -12.62 0.00
 12 28 3 -7.59 0.00
 12 28 4 13.36 0.00
 12 28 5 -1.11 0.00
 12 28 6 1.25 0.00
 12 28 7 -4.57 0.00
 12 28 8 -7.17 0.00
 12 28 9 0.24 0.00
 12 28 10 2.34 0.00
 12 28 11 2.25 0.00
 12 28 12 6.10 0.00
 12 28 13 -4.58 0.00
 12 28 14 -0.03 0.00
 12 30 0 -7.91 0.00
 12 30 1 2.02 0.00
 12 30 2 3.44 0.00
 12 30 3 -0.24 0.00
 12 30 4 -8.69 0.00
 12 30 5 -2.02 0.00
 12 30 6 -0.47 0.00
 12 30 7 -0.12 0.00
 12 30 8 1.88 0.00
 12 30 9 -2.91 0.00
 12 30 10 2.09 0.00
 12 30 11 -0.05 0.00
 12 30 12 -5.19 0.00
 12 30 13 -3.08 0.00
 12 32 0 -9.92 0.00
 12 32 1 3.78 0.00
 12 32 2 10.46 0.00
 12 32 3 0.03 0.00
 12 32 4 -2.85 0.00
 12 32 5 -9.25 0.00
 12 32 6 -1.98 0.00
 12 32 7 -2.27 0.00
 12 32 8 -5.07 0.00
 12 32 9 0.35 0.00
 12 32 10 -7.30 0.00
 12 32 11 -2.81 0.00
 12 32 12 6.71 0.00
 12 34 0 8.24 0.00
 12 34 1 -7.29 0.00
 12 34 2 -9.06 0.00
 12 34 3 -7.60 0.00
 12 34 4 1.87 0.00
 12 34 5 2.69 0.00
 12 34 6 -4.18 0.00
 12 34 7 -6.13 0.00
 12 34 8 -0.48 0.00
 12 34 9 -5.48 0.00
 12 34 10 5.94 0.00
 12 36 0 -3.08 0.00
 12 36 1 8.86 0.00
 12 36 2 0.06 0.00
 12 36 3 -11.57 0.00
 12 36 4 -1.84 0.00
 12 36 5 -1.45 0.00
 12 36 6 -4.95 0.00
 12 36 7 1.48 0.00
 12 36 8 -3.23 0.00
 12 36 9 -0.49 0.00
 12 38 0 -1.84 0.00
 12 38 1 -5.11 0.00
 12 38 2 2.38 0.00
 12 38 3 -7.24 0.00
 12 38 4 -0.59 0.00
 12 38 5 0.82 0.00
 12 38 6 -2.91 0.00
 12 38 7 2.02 0.00
 12 38 8 -1.89 0.00
 12 40 0 0.71 0.00
 12 40 1 -0.66 0.00
 12 40 2 -2.05 0.00
 12 40 3 -0.14 0.00
 12 40 4 -3.58 0.00
 12 40 5 -1.42 0.00
 12 40 6 0.61 0.00
 12 40 7 -0.85 0.00
 12 42 0 4.03 0.00
 12 42 1 -3.00 0.00
 12 42 2 4.87 0.00
 12 42 3 -0.60 0.00
 12 42 4 6.34 0.00
 12 42 5 -1.96 0.00
 13 1 1 33.58 0.00
 13 1 2 4.48 0.00
 13 1 3 0.52 0.00
 13 1 4 -3.49 0.00
 13 1 5 -0.54 0.00
 13 1 6 6.09 0.00
 13 1 7 11.51 0.00
 13 1 8 7.11 0.00
 13 1 9 2.07 0.00
 13 1 10 1.29 0.00
 13 1 11 -10.64 0.00
 13 1 12 1.42 0.00
 13 1 13 -2.86 0.00
 13 1 14 5.52 0.00
 13 1 15 0.75 0.00
 13 1 16 0.68 0.00
 13 1 17 2.05 0.00
 13 1 18 6.92 0.00
 13 3 1 -4.26 0.00
 13 3 2 -3.70 0.00
 13 3 3 -3.11 0.00
 13 3 4 -1.17 0.00
 13 3 5 6.99 0.00
 13 3 6 5.67 0.00
 13 3 7 0.74 0.00
 13 3 8 -2.81 0.00
 13 3 9 -1.09 0.00
 13 3 10 -3.72 0.00
 13 3 11 4.44 0.00
 13 3 12 0.04 0.00
 13 3 13 0.26 0.00
 13 3 14 -5.69 0.00
 13 3 15 2.33 0.00
 13 3 16 -2.56 0.00
 13 3 17 -3.35 0.00
 13 3 18 -9.43 0.00
 13 5 1 1.77 0.00
 13 5 2 -10.54 0.00
 13 5 3 9.52 0.00
 13 5 4 5.92 0.00
 13 5 5 -7.00 0.00
 13 5 6 6.08 0.00
 13 5 7 8.11 0.00
 13 5 8 9.08 0.00
 13 5 9 5.78 0.00
 13 5 10 2.29 0.00
 13 5 11 -4.36 0.00
 13 5 12 5.59 0.00
 13 5 13 -2.58 0.00
 13 5 14 0.30 0.00
 13 5 15 0.19 0.00
 13 5 16 1.87 0.00
 13 5 17 -0.54 0.00
 13 5 18 1.33 0.00
 13 7 1 14.90 0.00
 13 7 2 10.12 0.00
 13 7 3 -9.64 0.00
 13 7 4 -3.43 0.00
 13 7 5 15.16 0.00
 13 7 6 15.60 0.00
 13 7 7 4.95 0.00
 13 7 8 -10.65 0.00
 13 7 9 7.14 0.00
 13 7 10 1.11 0.00
 13 7 11 3.30 0.00
 13 7 12 -2.93 0.00
 13 7 13 -3.36 0.00
 13 7 14 -3.25 0.00
 13 7 15 -2.15 0.00
 13 7 16 -4.07 0.00
 13 7 17 -2.95 0.00
 13 7 18 -3.36 0.00
 13 9 1 7.92 0.00
 13 9 2 3.77 0.00
 13 9 3 -1.23 0.00
 13 9 4 3.80 0.00
 13 9 5 10.61 0.00
 13 9 6 7.45 0.00
 13 9 7 9.61 0.00
 13 9 8 2.00 0.00
 13 9 9 -3.53 0.00
 13 9 10 3.86 0.00
 13 9 11 10.78 0.00
 13 9 12 -4.99 0.00
 13 9 13 -11.56 0.00
 13 9 14 -2.55 0.00
 13 9 15 -0.12 0.00
 13 9 16 -1.72 0.00
 13 9 17 -1.09 0.00
 13 11 1 -10.81 0.00
 13 11 2 9.50 0.00
 13 11 3 19.42 0.00
 13 11 4 4.48 0.00
 13 11 5 -2.06 0.00
 13 11 6 3.41 0.00
 13 11 7 3.92 0.00
 13 11 8 8.20 0.00
 13 11 9 12.64 0.00
 13 11 10 -1.99 0.00
 13 11 11 2.25 0.00
 13 11 12 -2.83 0.00
 13 11 13 -3.68 0.00
 13 11 14 -3.00 0.00
 13 11 15 -4.22 0.00
 13 11 16 -4.40 0.00
 13 11 17 -4.25 0.00
 13 13 1 18.71 0.00
 13 13 2 6.63 0.00
 13 13 3 -7.35 0.00
 13 13 4 6.50 0.00
 13 13 5 14.63 0.00
 13 13 6 9.18 0.00
 13 13 7 4.86 0.00
 13 13 8 7.92 0.00
 13 13 9 3.99 0.00
 13 13 10 0.56 0.00
 13 13 11 -8.56 0.00
 13 13 12 -3.00 0.00
 13 13 13 6.58 0.00
 13 13 14 2.39 0.00
 13 13 15 -2.63 0.00
 13 13 16 -1.41 0.00
 13 13 17 5.00 0.00
 13 15 1 9.94 0.00
 13 15 2 0.25 0.00
 13 15 3 -0.88 0.00
 13 15 4 -1.99 0.00
 13 15 5 9.08 0.00
 13 15 6 7.20 0.00
 13 15 7 9.13 0.00
 13 15 8 3.02 0.00
 13 15 9 7.95 0.00
 13 15 10 -1.34 0.00
 13 15 11 -3.65 0.00
 13 15 12 -4.71 0.00
 13 15 13 -5.56 0.00
 13 15 14 -2.36 0.00
 13 15 15 -4.28 0.00
 13 15 16 -1.26 0.00
 13 15 17 0.80 0.00
 13 17 1 0.19 0.00
 13 17 2 6.12 0.00
 13 17 3 18.57 0.00
 13 17 4 10.29 0.00
 13 17 5 0.76 0.00
 13 17 6 2.35 0.00
 13 17 7 7.02 0.00
 13 17 8 4.51 0.00
 13 17 9 1.16 0.00
 13 17 10 9.82 0.00
 13 17 11 -13.35 0.00
 13 17 12 -1.13 0.00
 13 17 13 -4.03 0.00
 13 17 14 -4.08 0.00
 13 17 15 -0.65 0.00
 13 17 16 -0.14 0.00
 13 19 1 -0.30 0.00
 13 19 2 3.91 0.00
 13 19 3 0.40 0.00
 13 19 4 1.63 0.00
 13 19 5 9.03 0.00
 13 19 6 5.39 0.00
 13 19 7 11.20 0.00
 13 19 8 -1.13 0.00
 13 19 9 1.25 0.00
 13 19 10 -6.19 0.00
 13 19 11 0.96 0.00
 13 19 12 -8.11 0.00
 13 19 13 3.85 0.00
 13 19 14 -0.67 0.00
 13 19 15 -3.44 0.00
 13 19 16 0.07 0.00
 13 21 1 5.83 0.00
 13 21 2 1.08 0.00
 13 21 3 4.63 0.00
 13 21 4 3.41 0.00
 13 21 5 6.27 0.00
 13 21 6 -2.87 0.00
 13 21 7 -2.54 0.00
 13 21 8 6.35 0.00
 13 21 9 4.85 0.00
 13 21 10 0.27 0.00
 13 21 11 3.35 0.00
 13 21 12 1.01 0.00
 13 21 13 -1.71 0.00
 13 21 14 -2.26 0.00
 13 21 15 -2.08 0.00
 13 23 1 -4.42 0.00
 13 23 2 10.31 0.00
 13 23 3 -0.63 0.00
 13 23 4 3.07 0.00
 13 23 5 2.89 0.00
 13 23 6 -1.43 0.00
 13 23 7 8.42 0.00
 13 23 8 2.48 0.00
 13 23 9 -3.28 0.00
 13 23 10 0.76 0.00
 13 23 11 -1.31 0.00
 13 23 12 0.34 0.00
 13 23 13 0.31 0.00
 13 23 14 0.47 0.00
 13 23 15 2.25 0.00
 13 25 1 -3.53 0.00
 13 25 2 -2.99 0.00
 13 25 3 6.82 0.00
 13 25 4 -1.07 0.00
 13 25 5 -1.81 0.00
 13 25 6 3.85 0.00
 13 25 7 5.24 0.00
 13 25 8 0.94 0.00
 13 25 9 3.31 0.00
 13 25 10 -2.68 0.00
 13 25 11 2.43 0.00
 13 25 12 -3.69 0.00
 13 25 13 1.03 0.00
 13 25 14 0.35 0.00
 13 27 1 -4.79 0.00
 13 27 2 0.40 0.00
 13 27 3 0.85 0.00
 13 27 4 5.05 0.00
 13 27 5 -0.10 0.00
 13 27 6 -3.30 0.00
 13 27 7 2.09 0.00
 13 27 8 2.99 0.00
 13 27 9 -3.10 0.00
 13 27 10 -0.26 0.00
 13 27 11 -5.34 0.00
 13 27 12 1.96 0.00
 13 27 13 0.73 0.00
 13 27 14 4.43 0.00
 13 29 1 5.60 0.00
 13 29 2 -0.38 0.00
 13 29 3 -7.98 0.00
 13 29 4 0.26 0.00
 13 29 5 7.62 0.00
 13 29 6 3.37 0.00
 13 29 7 -2.26 0.00
 13 29 8 -3.44 0.00
 13 29 9 0.31 0.00
 13 29 10 -0.60 0.00
 13 29 11 -3.15 0.00
 13 29 12 -2.21 0.00
 13 29 13 2.24 0.00
 13 31 1 -2.18 0.00
 13 31 2 1.61 0.00
 13 31 3 2.01 0.00
 13 31 4 1.12 0.00
 13 31 5 0.10 0.00
 13 31 6 -1.31 0.00
 13 31 7 -4.42 0.00
 13 31 8 -5.13 0.00
 13 31 9 3.60 0.00
 13 31 10 3.48 0.00
 13 31 11 2.42 0.00
 13 31 12 2.62 0.00
 13 33 1 -2.93 0.00
 13 33 2 6.39 0.00
 13 33 3 -0.98 0.00
 13 33 4 0.72 0.00
 13 33 5 -1.00 0.00
 13 33 6 0.40 0.00
 13 33 7 1.56 0.00
 13 33 8 2.61 0.00
 13 33 9 -5.18 0.00
 13 33 10 2.25 0.00
 13 35 1 6.95 0.00
 13 35 2 -11.76 0.00
 13 35 3 -0.93 0.00
 13 35 4 4.06 0.00
 13 35 5 -4.49 0.00
 13 35 6 1.59 0.00
 13 35 7 -4.21 0.00
 13 35 8 -4.55 0.00
 13 35 9 4.00 0.00
 13 37 1 -8.02 0.00
 13 37 2 -0.21 0.00
 13 37 3 -1.98 0.00
 13 37 4 -2.28 0.00
 13 37 5 0.22 0.00
 13 37 6 -2.58 0.00
 13 37 7 7.51 0.00
 13 37 8 -2.86 0.00
 13 39 1 -1.71 0.00
 13 39 2 -2.55 0.00
 13 39 3 0.13 0.00
 13 39 4 -1.91 0.00
 13 39 5 -7.65 0.00
 13 39 6 0.44 0.00
 13 39 7 6.28 0.00
 13 41 1 3.21 0.00
 13 41 2 -3.66 0.00
 13 41 3 -2.73 0.00
 13 41 4 -7.28 0.00
 13 41 5 -0.17 0.00
 14 0 0 30.14 0.00
 14 0 1 -3.10 0.00
 14 0 2 -11.64 0.00
 14 0 3 -6.12 0.00
 14 0 4 -2.34 0.00
 14 0 5 -3.50 0.00
 14 0 6 11.90 0.00
 14 0 7 4.30 0.00
 14 0 8 -4.25 0.00
 14 0 9 9.72 0.00
 14 0 10 0.08 0.00
 14 0 11 -3.04 0.00
 14 0 12 8.63 0.00
 14 0 13 1.63 0.00
 14 0 14 5.04 0.00
 14 0 15 -4.38 0.00
 14 0 16 3.08 0.00
 14 0 17 -7.19 0.00
 14 2 0 0.33 0.00
 14 2 1 -14.68 0.00
 14 2 2 -8.71 0.00
 14 2 3 -0.55 0.00
 14 2 4 -4.64 0.00
 14 2 5 -1.62 0.00
 14 2 6 -10.00 0.00
 14 2 7 2.38 0.00
 14 2 8 12.06 0.00
 14 2 9 12.78 0.00
 14 2 10 9.61 0.00
 14 2 11 4.07 0.00
 14 2 12 1.28 0.00
 14 2 13 4.62 0.00
 14 2 14 -2.10 0.00
 14 2 15 4.54 0.00
 14 2 16 -1.93 0.00
 14 2 17 6.00 0.00
 14 4 0 11.15 0.00
 14 4 1 -3.17 0.00
 14 4 2 -13.47 0.00
 14 4 3 -1.10 0.00
 14 4 4 -0.18 0.00
 14 4 5 -4.46 0.00
 14 4 6 -3.41 0.00
 14 4 7 -2.04 0.00
 14 4 8 4.23 0.00
 14 4 9 6.17 0.00
 14 4 10 6.67 0.00
 14 4 11 1.76 0.00
 14 4 12 -2.41 0.00
 14 4 13 -0.98 0.00
 14 4 14 5.42 0.00
 14 4 15 -0.50 0.00
 14 4 16 0.24 0.00
 14 4 17 -7.16 0.00
 14 6 0 -10.04 0.00
 14 6 1 -6.68 0.00
 14 6 2 6.05 0.00
 14 6 3 -10.08 0.00
 14 6 4 4.10 0.00
 14 6 5 0.81 0.00
 14 6 6 2.01 0.00
 14 6 7 0.51 0.00
 14 6 8 0.80 0.00
 14 6 9 0.08 0.00
 14 6 10 14.39 0.00
 14 6 11 10.84 0.00
 14 6 12 -3.31 0.00
 14 6 13 4.61 0.00
 14 6 14 2.61 0.00
 14 6 15 1.69 0.00
 14 6 16 -0.02 0.00
 14 6 17 5.50 0.00
 14 8 0 0.66 0.00
 14 8 1 -2.92 0.00
 14 8 2 4.19 0.00
 14 8 3 -1.45 0.00
 14 8 4 -15.82 0.00
 14 8 5 -7.48 0.00
 14 8 6 -3.70 0.00
 14 8 7 4.46 0.00
 14 8 8 -4.67 0.00
 14 8 9 2.52 0.00
 14 8 10 6.14 0.00
 14 8 11 7.34 0.00
 14 8 12 -4.83 0.00
 14 8 13 1.29 0.00
 14 8 14 0.44 0.00
 14 8 15 -0.49 0.00
 14 8 16 3.36 0.00
 14 8 17 -2.34 0.00
 14 10 0 -6.46 0.00
 14 10 1 -4.62 0.00
 14 10 2 -5.57 0.00
 14 10 3 -6.64 0.00
 14 10 4 11.46 0.00
 14 10 5 6.32 0.00
 14 10 6 -2.23 0.00
 14 10 7 -0.37 0.00
 14 10 8 14.52 0.00
 14 10 9 4.16 0.00
 14 10 10 -0.68 0.00
 14 10 11 5.56 0.00
 14 10 12 1.25 0.00
 14 10 13 1.92 0.00
 14 10 14 -3.71 0.00
 14 10 15 1.16 0.00
 14 10 16 2.22 0.00
 14 10 17 2.51 0.00
 14 12 0 4.95 0.00
 14 12 1 -8.07 0.00
 14 12 2 6.22 0.00
 14 12 3 3.71 0.00
 14 12 4 -5.50 0.00
 14 12 5 -1.73 0.00
 14 12 6 -1.57 0.00
 14 12 7 5.67 0.00
 14 12 8 5.44 0.00
 14 12 9 5.47 0.00
 14 12 10 1.48 0.00
 14 12 11 8.61 0.00
 14 12 12 9.76 0.00
 14 12 13 0.28 0.00
 14 12 14 0.21 0.00
 14 12 15 -0.70 0.00
 14 12 16 1.57 0.00
 14 12 17 -7.17 0.00
 14 14 0 -25.16 0.00
 14 14 1 -8.59 0.00
 14 14 2 3.07 0.00
 14 14 3 6.07 0.00
 14 14 4 -7.92 0.00
 14 14 5 1.54 0.00
 14 14 6 11.60 0.00
 14 14 7 -1.51 0.00
 14 14 8 2.02 0.00
 14 14 9 2.62 0.00
 14 14 10 4.87 0.00
 14 14 11 4.37 0.00
 14 14 12 -7.54 0.00
 14 14 13 -5.40 0.00
 14 14 14 0.27 0.00
 14 14 15 4.38 0.00
 14 14 16 0.89 0.00
 14 16 0 10.79 0.00
 14 16 1 3.56 0.00
 14 16 2 3.04 0.00
 14 16 3 0.05 0.00
 14 16 4 2.61 0.00
 14 16 5 -1.82 0.00
 14 16 6 2.84 0.00
 14 16 7 6.45 0.00
 14 16 8 2.70 0.00
 14 16 9 5.30 0.00
 14 16 10 1.03 0.00
 14 16 11 -2.00 0.00
 14 16 12 3.45 0.00
 14 16 13 1.43 0.00
 14 16 14 3.06 0.00
 14 16 15 0.56 0.00
 14 16 16 -1.60 0.00
 14 18 0 -5.98 0.00
 14 18 1 -2.26 0.00
 14 18 2 -4.69 0.00
 14 18 3 7.33 0.00
 14 18 4 3.83 0.00
 14 18 5 1.01 0.00
 14 18 6 -3.24 0.00
 14 18 7 -3.91 0.00
 14 18 8 5.83 0.00
 14 18 9 -0.53 0.00
 14 18 10 3.84 0.00
 14 18 11 5.41 0.00
 14 18 12 -1.24 0.00
 14 18 13 6.74 0.00
 14 18 14 -3.63 0.00
 14 18 15 -0.39 0.00
 14 20 0 8.43 0.00
 14 20 1 10.45 0.00
 14 20 2 5.19 0.00
 14 20 3 0.01 0.00
 14 20 4 -2.85 0.00
 14 20 5 1.34 0.00
 14 20 6 4.62 0.00
 14 20 7 4.12 0.00
 14 20 8 -5.44 0.00
 14 20 9 -4.24 0.00
 14 20 10 0.66 0.00
 14 20 11 -2.79 0.00
 14 20 12 -0.86 0.00
 14 20 13 -8.74 0.00
 14 20 14 -3.82 0.00
 14 20 15 -1.23 0.00
 14 22 0 9.59 0.00
 14 22 1 5.61 0.00
 14 22 2 8.09 0.00
 14 22 3 5.49 0.00
 14 22 4 3.85 0.00
 14 22 5 1.93 0.00
 14 22 6 -5.72 0.00
 14 22 7 1.21 0.00
 14 22 8 -3.08 0.00
 14 22 9 1.66 0.00
 14 22 10 -3.71 0.00
 14 22 11 4.19 0.00
 14 22 12 2.17 0.00
 14 22 13 7.05 0.00
 14 22 14 -2.40 0.00
 14 22 15 -2.53 0.00
 14 24 0 10.04 0.00
 14 24 1 4.86 0.00
 14 24 2 2.55 0.00
 14 24 3 8.62 0.00
 14 24 4 6.50 0.00
 14 24 5 5.94 0.00
 14 24 6 -3.93 0.00
 14 24 7 -3.87 0.00
 14 24 8 2.83 0.00
 14 24 9 0.98 0.00
 14 24 10 -2.26 0.00
 14 24 11 -14.11 0.00
 14 24 12 -3.00 0.00
 14 24 13 -6.31 0.00
 14 24 14 -0.54 0.00
 14 26 0 21.81 0.00
 14 26 1 9.55 0.00
 14 26 2 -3.31 0.00
 14 26 3 2.39 0.00
 14 26 4 7.68 0.00
 14 26 5 4.32 0.00
 14 26 6 0.98 0.00
 14 26 7 1.29 0.00
 14 26 8 -9.61 0.00
 14 26 9 -0.80 0.00
 14 26 10 -1.58 0.00
 14 26 11 5.42 0.00
 14 26 12 -0.19 0.00
 14 26 13 0.16 0.00
 14 28 0 -5.69 0.00
 14 28 1 3.15 0.00
 14 28 2 13.96 0.00
 14 28 3 10.81 0.00
 14 28 4 -2.09 0.00
 14 28 5 -2.21 0.00
 14 28 6 8.05 0.00
 14 28 7 2.62 0.00
 14 28 8 4.34 0.00
 14 28 9 -2.14 0.00
 14 28 10 3.89 0.00
 14 28 11 -1.18 0.00
 14 28 12 -6.30 0.00
 14 30 0 2.16 0.00
 14 30 1 10.40 0.00
 14 30 2 3.19 0.00
 14 30 3 -2.75 0.00
 14 30 4 2.89 0.00
 14 30 5 2.47 0.00
 14 30 6 3.58 0.00
 14 30 7 -1.06 0.00
 14 30 8 -4.99 0.00
 14 30 9 -0.67 0.00
 14 30 10 -2.39 0.00
 14 30 11 -1.21 0.00
 14 32 0 13.95 0.00
 14 32 1 8.64 0.00
 14 32 2 -0.97 0.00
 14 32 3 -1.22 0.00
 14 32 4 7.00 0.00
 14 32 5 1.61 0.00
 14 32 6 0.47 0.00
 14 32 7 -5.31 0.00
 14 32 8 1.93 0.00
 14 32 9 -3.32 0.00
 14 32 10 -5.40 0.00
 14 34 0 -7.67 0.00
 14 34 1 -3.38 0.00
 14 34 2 14.69 0.00
 14 34 3 6.56 0.00
 14 34 4 -4.15 0.00
 14 34 5 -3.74 0.00
 14 34 6 -3.64 0.00
 14 34 7 1.45 0.00
 14 34 8 -0.59 0.00
 14 34 9 4.62 0.00
 14 36 0 1.67 0.00
 14 36 1 8.87 0.00
 14 36 2 0.59 0.00
 14 36 3 -4.39 0.00
 14 36 4 4.06 0.00
 14 36 5 0.51 0.00
 14 36 6 1.93 0.00
 14 36 7 -1.16 0.00
 14 36 8 -6.25 0.00
 14 38 0 11.87 0.00
 14 38 1 -0.06 0.00
 14 38 2 1.27 0.00
 14 38 3 -2.64 0.00
 14 38 4 3.07 0.00
 14 38 5 0.84 0.00
 14 38 6 -0.47 0.00
 14 38 7 10.58 0.00
 14 40 0 2.97 0.00
 14 40 1 0.03 0.00
 14 40 2 1.28 0.00
 14 40 3 0.95 0.00
 14 40 4 -0.33 0.00
 14 40 5 6.10 0.00
 15 1 1 -17.97 0.00
 15 1 2 -9.13 0.00
 15 1 3 6.09 0.00
 15 1 4 0.82 0.00
 15 1 5 11.43 0.00
 15 1 6 -1.88 0.00
 15 1 7 5.21 0.00
 15 1 8 -5.25 0.00
 15 1 9 2.96 0.00
 15 1 10 0.88 0.00
 15 1 11 -5.56 0.00
 15 1 12 -0.50 0.00
 15 1 13 -1.67 0.00
 15 1 14 1.71 0.00
 15 1 15 2.36 0.00
 15 1 16 2.22 0.00
 15 1 17 -0.37 0.00
 15 3 1 16.66 0.00
 15 3 2 0.40 0.00
 15 3 3 -3.34 0.00
 15 3 4 -0.53 0.00
 15 3 5 -8.86 0.00
 15 3 6 4.78 0.00
 15 3 7 11.43 0.00
 15 3 8 5.01 0.00
 15 3 9 0.15 0.00
 15 3 10 2.79 0.00
 15 3 11 0.23 0.00
 15 3 12 0.47 0.00
 15 3 13 0.08 0.00
 15 3 14 -1.53 0.00
 15 3 15 3.28 0.00
 15 3 16 4.51 0.00
 15 3 17 0.88 0.00
 15 5 1 11.65 0.00
 15 5 2 -0.63 0.00
 15 5 3 -11.35 0.00
 15 5 4 -3.12 0.00
 15 5 5 14.15 0.00
 15 5 6 11.75 0.00
 15 5 7 7.24 0.00
 15 5 8 -6.88 0.00
 15 5 9 2.05 0.00
 15 5 10 4.21 0.00
 15 5 11 -0.09 0.00
 15 5 12 0.97 0.00
 15 5 13 1.95 0.00
 15 5 14 1.18 0.00
 15 5 15 0.35 0.00
 15 5 16 1.93 0.00
 15 5 17 3.74 0.00
 15 7 1 -6.87 0.00
 15 7 2 -5.55 0.00
 15 7 3 3.38 0.00
 15 7 4 5.42 0.00
 15 7 5 3.90 0.00
 15 7 6 6.31 0.00
 15 7 7 4.13 0.00
 15 7 8 3.92 0.00
 15 7 9 12.08 0.00
 15 7 10 2.05 0.00
 15 7 11 0.08 0.00
 15 7 12 -4.51 0.00
 15 7 13 -0.67 0.00
 15 7 14 2.50 0.00
 15 7 15 0.19 0.00
 15 7 16 -1.16 0.00
 15 9 1 7.04 0.00
 15 9 2 16.37 0.00
 15 9 3 5.51 0.00
 15 9 4 -2.61 0.00
 15 9 5 3.23 0.00
 15 9 6 6.30 0.00
 15 9 7 7.40 0.00
 15 9 8 4.74 0.00
 15 9 9 5.40 0.00
 15 9 10 -1.57 0.00
 15 9 11 5.21 0.00
 15 9 12 1.36 0.00
 15 9 13 -1.68 0.00
 15 9 14 -3.52 0.00
 15 9 15 1.00 0.00
 15 9 16 -3.03 0.00
 15 11 1 3.01 0.00
 15 11 2 3.20 0.00
 15 11 3 -9.13 0.00
 15 11 4 3.79 0.00
 15 11 5 7.77 0.00
 15 11 6 9.05 0.00
 15 11 7 5.24 0.00
 15 11 8 -2.13 0.00
 15 11 9 3.12 0.00
 15 11 10 8.53 0.00
 15 11 11 8.71 0.00
 15 11 12 -2.98 0.00
 15 11 13 -4.64 0.00
 15 11 14 -3.53 0.00
 15 11 15 1.44 0.00
 15 11 16 0.76 0.00
 15 13 1 1.96 0.00
 15 13 2 7.88 0.00
 15 13 3 7.69 0.00
 15 13 4 1.41 0.00
 15 13 5 2.90 0.00
 15 13 6 3.21 0.00
 15 13 7 3.69 0.00
 15 13 8 5.72 0.00
 15 13 9 4.37 0.00
 15 13 10 2.09 0.00
 15 13 11 -1.99 0.00
 15 13 12 -3.81 0.00
 15 13 13 0.56 0.00
 15 13 14 4.42 0.00
 15 13 15 1.86 0.00
 15 13 16 -1.60 0.00
 15 15 1 -3.94 0.00
 15 15 2 0.42 0.00
 15 15 3 6.86 0.00
 15 15 4 1.93 0.00
 15 15 5 -3.16 0.00
 15 15 6 1.72 0.00
 15 15 7 7.34 0.00
 15 15 8 5.35 0.00
 15 15 9 -1.00 0.00
 15 15 10 -1.61 0.00
 15 15 11 2.11 0.00
 15 15 12 2.93 0.00
 15 15 13 2.08 0.00
 15 15 14 -0.49 0.00
 15 15 15 -1.06 0.00
 15 17 1 1.85 0.00
 15 17 2 2.44 0.00
 15 17 3 6.68 0.00
 15 17 4 4.34 0.00
 15 17 5 6.23 0.00
 15 17 6 -0.36 0.00
 15 17 7 2.36 0.00
 15 17 8 5.54 0.00
 15 17 9 1.20 0.00
 15 17 10 3.88 0.00
 15 17 11 -5.85 0.00
 15 17 12 -4.86 0.00
 15 17 13 -7.00 0.00
 15 17 14 -0.95 0.00
 15 17 15 0.03 0.00
 15 19 1 6.08 0.00
 15 19 2 3.04 0.00
 15 19 3 -0.41 0.00
 15 19 4 -1.57 0.00
 15 19 5 3.39 0.00
 15 19 6 -0.70 0.00
 15 19 7 -0.37 0.00
 15 19 8 -0.41 0.00
 15 19 9 3.45 0.00
 15 19 10 -2.35 0.00
 15 19 11 -0.42 0.00
 15 19 12 -0.87 0.00
 15 19 13 -0.92 0.00
 15 19 14 -0.98 0.00
 15 19 15 -3.12 0.00
 15 21 1 0.08 0.00
 15 21 2 8.29 0.00
 15 21 3 3.35 0.00
 15 21 4 1.22 0.00
 15 21 5 1.43 0.00
 15 21 6 2.86 0.00
 15 21 7 3.60 0.00
 15 21 8 1.19 0.00
 15 21 9 1.28 0.00
 15 21 10 -0.28 0.00
 15 21 11 0.84 0.00
 15 21 12 0.08 0.00
 15 21 13 7.40 0.00
 15 21 14 -4.54 0.00
 15 23 1 -7.32 0.00
 15 23 2 -2.12 0.00
 15 23 3 7.07 0.00
 15 23 4 3.51 0.00
 15 23 5 -1.08 0.00
 15 23 6 -6.84 0.00
 15 23 7 -5.69 0.00
 15 23 8 -2.11 0.00
 15 23 9 5.96 0.00
 15 23 10 2.18 0.00
 15 23 11 -2.69 0.00
 15 23 12 2.07 0.00
 15 23 13 -4.40 0.00
 15 23 14 1.47 0.00
 15 25 1 -0.45 0.00
 15 25 2 5.49 0.00
 15 25 3 -4.09 0.00
 15 25 4 0.22 0.00
 15 25 5 2.96 0.00
 15 25 6 2.63 0.00
 15 25 7 4.60 0.00
 15 25 8 4.70 0.00
 15 25 9 0.64 0.00
 15 25 10 1.92 0.00
 15 25 11 8.08 0.00
 15 25 12 0.01 0.00
 15 25 13 2.07 0.00
 15 27 1 4.20 0.00
 15 27 2 -2.26 0.00
 15 27 3 0.32 0.00
 15 27 4 1.49 0.00
 15 27 5 -1.88 0.00
 15 27 6 -1.84 0.00
 15 27 7 0.51 0.00
 15 27 8 -0.10 0.00
 15 27 9 -1.12 0.00
 15 27 10 0.43 0.00
 15 27 11 -8.21 0.00
 15 27 12 0.45 0.00
 15 29 1 -7.45 0.00
 15 29 2 -2.56 0.00
 15 29 3 5.87 0.00
 15 29 4 4.95 0.00
 15 29 5 1.88 0.00
 15 29 6 0.73 0.00
 15 29 7 -3.20 0.00
 15 29 8 -2.96 0.00
 15 29 9 3.51 0.00
 15 29 10 1.19 0.00
 15 29 11 6.88 0.00
 15 31 1 3.58 0.00
 15 31 2 2.73 0.00
 15 31 3 -2.16 0.00
 15 31 4 -3.43 0.00
 15 31 5 -2.35 0.00
 15 31 6 -0.23 0.00
 15 31 7 3.57 0.00
 15 31 8 -0.48 0.00
 15 31 9 -1.61 0.00
 15 33 1 0.01 0.00
 15 33 2 1.54 0.00
 15 33 3 -0.40 0.00
 15 33 4 2.53 0.00
 15 33 5 1.40 0.00
 15 33 6 -1.37 0.00
 15 33 7 -5.94 0.00
 15 33 8 -3.73 0.00
 15 35 1 -4.64 0.00
 15 35 2 -6.69 0.00
 15 35 3 2.37 0.00
 15 35 4 1.21 0.00
 15 35 5 -2.52 0.00
 15 35 6 -1.71 0.00
 15 35 7 1.58 0.00
 15 35 8 5.19 0.00
 15 37 1 2.97 0.00
 15 37 2 0.21 0.00
 15 37 3 -3.99 0.00
 15 37 4 -3.36 0.00
 15 37 5 -8.71 0.00
 15 37 6 4.74 0.00
 15 39 1 2.51 0.00
 15 39 2 -3.45 0.00
 15 39 3 -5.88 0.00
 15 39 4 -8.54 0.00
 16 0 0 26.77 0.00
 16 0 1 -7.54 0.00
 16 0 2 -0.44 0.00
 16 0 3 4.01 0.00
 16 0 4 2.82 0.00
 16 0 5 0.37 0.00
 16 0 6 -11.10 0.00
 16 0 7 2.29 0.00
 16 0 8 5.63 0.00
 16 0 9 6.70 0.00
 16 0 10 1.71 0.00
 16 0 11 3.74 0.00
 16 0 12 4.27 0.00
 16 0 13 -1.75 0.00
 16 0 14 -3.69 0.00
 16 0 15 -9.70 0.00
 16 0 16 0.55 0.00
 16 2 0 13.67 0.00
 16 2 1 1.85 0.00
 16 2 2 -10.79 0.00
 16 2 3 -3.89 0.00
 16 2 4 -3.49 0.00
 16 2 5 -6.44 0.00
 16 2 6 9.13 0.00
 16 2 7 -0.26 0.00
 16 2 8 -1.53 0.00
 16 2 9 2.22 0.00
 16 2 10 3.89 0.00
 16 2 11 -3.21 0.00
 16 2 12 -3.85 0.00
 16 2 13 2.51 0.00
 16 2 14 3.91 0.00
 16 2 15 5.60 0.00
 16 2 16 1.36 0.00
 16 4 0 1.74 0.00
 16 4 1 -6.18 0.00
 16 4 2 7.79 0.00
 16 4 3 4.14 0.00
 16 4 4 -0.58 0.00
 16 4 5 -0.42 0.00
 16 4 6 -9.60 0.00
 16 4 7 -3.94 0.00
 16 4 8 0.38 0.00
 16 4 9 1.28 0.00
 16 4 10 7.14 0.00
 16 4 11 3.21 0.00
 16 4 12 -2.23 0.00
 16 4 13 -1.15 0.00
 16 4 14 -0.92 0.00
 16 4 15 -3.48 0.00
 16 4 16 -2.46 0.00
 16 6 0 21.47 0.00
 16 6 1 7.82 0.00
 16 6 2 0.01 0.00
 16 6 3 3.38 0.00
 16 6 4 -0.08 0.00
 16 6 5 -1.56 0.00
 16 6 6 -2.04 0.00
 16 6 7 -1.04 0.00
 16 6 8 1.07 0.00
 16 6 9 -5.34 0.00
 16 6 10 -2.20 0.00
 16 6 11 0.92 0.00
 16 6 12 -5.96 0.00
 16 6 13 1.91 0.00
 16 6 14 1.30 0.00
 16 6 15 1.42 0.00
 16 6 16 3.33 0.00
 16 8 0 -9.78 0.00
 16 8 1 -2.78 0.00
 16 8 2 8.07 0.00
 16 8 3 -6.30 0.00
 16 8 4 3.23 0.00
 16 8 5 -1.99 0.00
 16 8 6 -5.19 0.00
 16 8 7 -0.54 0.00
 16 8 8 -4.41 0.00
 16 8 9 -1.06 0.00
 16 8 10 1.62 0.00
 16 8 11 2.50 0.00
 16 8 12 -2.91 0.00
 16 8 13 -0.57 0.00
 16 8 14 1.32 0.00
 16 8 15 0.22 0.00
 16 8 16 4.26 0.00
 16 10 0 8.99 0.00
 16 10 1 5.69 0.00
 16 10 2 4.46 0.00
 16 10 3 10.75 0.00
 16 10 4 -7.04 0.00
 16 10 5 -0.22 0.00
 16 10 6 2.98 0.00
 16 10 7 -0.34 0.00
 16 10 8 -4.16 0.00
 16 10 9 5.26 0.00
 16 10 10 -9.35 0.00
 16 10 11 -0.33 0.00
 16 10 12 1.05 0.00
 16 10 13 0.19 0.00
 16 10 14 -4.80 0.00
 16 10 15 1.18 0.00
 16 10 16 -1.33 0.00
 16 12 0 -2.01 0.00
 16 12 1 -2.93 0.00
 16 12 2 1.55 0.00
 16 12 3 -3.09 0.00
 16 12 4 7.73 0.00
 16 12 5 1.27 0.00
 16 12 6 -0.22 0.00
 16 12 7 -4.81 0.00
 16 12 8 4.09 0.00
 16 12 9 -1.90 0.00
 16 12 10 2.32 0.00
 16 12 11 -1.67 0.00
 16 12 12 1.17 0.00
 16 12 13 0.62 0.00
 16 12 14 2.49 0.00
 16 12 15 -0.93 0.00
 16 14 0 -4.15 0.00
 16 14 1 -2.80 0.00
 16 14 2 2.13 0.00
 16 14 3 4.01 0.00
 16 14 4 -4.94 0.00
 16 14 5 -1.67 0.00
 16 14 6 -3.42 0.00
 16 14 7 4.44 0.00
 16 14 8 0.59 0.00
 16 14 9 1.64 0.00
 16 14 10 -1.42 0.00
 16 14 11 -1.35 0.00
 16 14 12 -4.34 0.00
 16 14 13 -3.60 0.00
 16 14 14 -3.33 0.00
 16 14 15 1.02 0.00
 16 16 0 -3.85 0.00
 16 16 1 -1.48 0.00
 16 16 2 1.91 0.00
 16 16 3 4.12 0.00
 16 16 4 2.14 0.00
 16 16 5 -0.34 0.00
 16 16 6 4.35 0.00
 16 16 7 -4.35 0.00
 16 16 8 2.06 0.00
 16 16 9 -4.19 0.00
 16 16 10 -4.12 0.00
 16 16 11 -2.33 0.00
 16 16 12 -1.80 0.00
 16 16 13 -2.13 0.00
 16 16 14 1.92 0.00
 16 16 15 0.46 0.00
 16 18 0 -8.90 0.00
 16 18 1 -0.71 0.00
 16 18 2 0.76 0.00
 16 18 3 -2.92 0.00
 16 18 4 -1.41 0.00
 16 18 5 -1.39 0.00
 16 18 6 -0.78 0.00
 16 18 7 -2.44 0.00
 16 18 8 -4.80 0.00
 16 18 9 3.03 0.00
 16 18 10 1.73 0.00
 16 18 11 -3.61 0.00
 16 18 12 -0.51 0.00
 16 18 13 -0.34 0.00
 16 18 14 4.16 0.00
 16 20 0 -0.19 0.00
 16 20 1 -2.61 0.00
 16 20 2 3.98 0.00
 16 20 3 6.50 0.00
 16 20 4 -3.61 0.00
 16 20 5 -5.10 0.00
 16 20 6 -2.00 0.00
 16 20 7 -2.38 0.00
 16 20 8 -2.32 0.00
 16 20 9 -4.94 0.00
 16 20 10 2.82 0.00
 16 20 11 -0.84 0.00
 16 20 12 -6.01 0.00
 16 20 13 0.32 0.00
 16 20 14 -8.85 0.00
 16 22 0 0.82 0.00
 16 22 1 1.14 0.00
 16 22 2 -4.44 0.00
 16 22 3 3.47 0.00
 16 22 4 1.52 0.00
 16 22 5 0.33 0.00
 16 22 6 -4.80 0.00
 16 22 7 4.80 0.00
 16 22 8 -0.93 0.00
 16 22 9 1.47 0.00
 16 22 10 -4.70 0.00
 16 22 11 -3.74 0.00
 16 22 12 2.65 0.00
 16 22 13 -0.78 0.00
 16 24 0 8.71 0.00
 16 24 1 -2.98 0.00
 16 24 2 -5.22 0.00
 16 24 3 -0.96 0.00
 16 24 4 2.08 0.00
 16 24 5 1.01 0.00
 16 24 6 2.23 0.00
 16 24 7 -0.51 0.00
 16 24 8 -3.19 0.00
 16 24 9 -10.24 0.00
 16 24 10 5.37 0.00
 16 24 11 0.14 0.00
 16 24 12 -0.71 0.00
 16 24 13 -2.69 0.00
 16 26 0 -8.19 0.00
 16 26 1 -3.77 0.00
 16 26 2 3.36 0.00
 16 26 3 9.67 0.00
 16 26 4 -5.64 0.00
 16 26 5 -0.67 0.00
 16 26 6 3.78 0.00
 16 26 7 6.70 0.00
 16 26 8 2.46 0.00
 16 26 9 4.18 0.00
 16 26 10 -6.52 0.00
 16 26 11 1.55 0.00
 16 26 12 -0.08 0.00
 16 28 0 0.60 0.00
 16 28 1 1.53 0.00
 16 28 2 -5.67 0.00
 16 28 3 -4.15 0.00
 16 28 4 7.20 0.00
 16 28 5 6.50 0.00
 16 28 6 -4.62 0.00
 16 28 7 -6.48 0.00
 16 28 8 8.09 0.00
 16 28 9 2.12 0.00
 16 28 10 8.48 0.00
 16 30 0 -3.86 0.00
 16 30 1 -3.64 0.00
 16 30 2 1.93 0.00
 16 30 3 -3.67 0.00
 16 30 4 -3.03 0.00
 16 30 5 -1.15 0.00
 16 30 6 16.43 0.00
 16 30 7 3.26 0.00
 16 30 8 0.56 0.00
 16 30 9 3.53 0.00
 16 32 0 -15.85 0.00
 16 32 1 4.86 0.00
 16 32 2 9.62 0.00
 16 32 3 -0.26 0.00
 16 32 4 -3.69 0.00
 16 32 5 0.33 0.00
 16 32 6 -0.33 0.00
 16 32 7 5.16 0.00
 16 32 8 -0.68 0.00
 16 34 0 9.77 0.00
 16 34 1 -1.98 0.00
 16 34 2 -0.84 0.00
 16 34 3 -3.61 0.00
 16 34 4 1.73 0.00
 16 34 5 1.47 0.00
 16 34 6 1.15 0.00
 16 34 7 -3.34 0.00
 16 36 0 -3.15 0.00
 16 36 1 1.62 0.00
 16 36 2 2.50 0.00
 16 36 3 1.85 0.00
 16 36 4 -1.56 0.00
 16 36 5 -2.33 0.00
 16 36 6 3.38 0.00
 16 38 0 4.21 0.00
 16 38 1 -2.30 0.00
 16 38 2 0.10 0.00
 16 38 3 1.34 0.00
 16 38 4 4.13 0.00
 17 1 1 22.34 0.00
 17 1 2 0.84 0.00
 17 1 3 -0.21 0.00
 17 1 4 -2.98 0.00
 17 1 5 -4.36 0.00
 17 1 6 -2.00 0.00
 17 1 7 -1.36 0.00
 17 1 8 -0.61 0.00
 17 1 9 1.38 0.00
 17 1 10 -2.13 0.00
 17 1 11 1.60 0.00
 17 1 12 -0.54 0.00
 17 1 13 6.43 0.00
 17 1 14 -0.38 0.00
 17 1 15 -0.39 0.00
 17 3 1 -7.32 0.00
 17 3 2 -0.58 0.00
 17 3 3 -11.04 0.00
 17 3 4 -3.02 0.00
 17 3 5 5.26 0.00
 17 3 6 -0.87 0.00
 17 3 7 5.03 0.00
 17 3 8 -4.28 0.00
 17 3 9 4.27 0.00
 17 3 10 3.90 0.00
 17 3 11 -11.25 0.00
 17 3 12 -2.38 0.00
 17 3 13 0.61 0.00
 17 3 14 6.96 0.00
 17 3 15 1.11 0.00
 17 5 1 -2.91 0.00
 17 5 2 -9.74 0.00
 17 5 3 0.35 0.00
 17 5 4 -1.25 0.00
 17 5 5 -6.73 0.00
 17 5 6 -0.42 0.00
 17 5 7 3.20 0.00
 17 5 8 -3.65 0.00
 17 5 9 -2.85 0.00
 17 5 10 2.64 0.00
 17 5 11 3.87 0.00
 17 5 12 -0.34 0.00
 17 5 13 3.81 0.00
 17 5 14 -1.65 0.00
 17 5 15 4.53 0.00
 17 7 1 14.50 0.00
 17 7 2 8.47 0.00
 17 7 3 -8.31 0.00
 17 7 4 -7.87 0.00
 17 7 5 -1.47 0.00
 17 7 6 2.06 0.00
 17 7 7 6.68 0.00
 17 7 8 -2.34 0.00
 17 7 9 0.82 0.00
 17 7 10 -5.06 0.00
 17 7 11 1.81 0.00
 17 7 12 0.20 0.00
 17 7 13 -3.73 0.00
 17 7 14 2.12 0.00
 17 7 15 0.61 0.00
 17 9 1 -16.75 0.00
 17 9 2 -5.70 0.00
 17 9 3 -4.31 0.00
 17 9 4 -5.64 0.00
 17 9 5 2.93 0.00
 17 9 6 -1.81 0.00
 17 9 7 -8.66 0.00
 17 9 8 -0.77 0.00
 17 9 9 1.69 0.00
 17 9 10 4.41 0.00
 17 9 11 7.95 0.00
 17 9 12 -1.90 0.00
 17 9 13 3.21 0.00
 17 9 14 2.05 0.00
 17 9 15 2.43 0.00
 17 11 1 4.03 0.00
 17 11 2 9.11 0.00
 17 11 3 -0.61 0.00
 17 11 4 -7.87 0.00
 17 11 5 -9.47 0.00
 17 11 6 -0.89 0.00
 17 11 7 -1.00 0.00
 17 11 8 -1.64 0.00
 17 11 9 9.33 0.00
 17 11 10 4.57 0.00
 17 11 11 -6.01 0.00
 17 11 12 2.52 0.00
 17 11 13 3.77 0.00
 17 11 14 -0.63 0.00
 17 11 15 4.15 0.00
 17 13 1 -9.30 0.00
 17 13 2 -3.35 0.00
 17 13 3 -8.15 0.00
 17 13 4 -2.93 0.00
 17 13 5 -4.16 0.00
 17 13 6 -1.72 0.00
 17 13 7 -1.28 0.00
 17 13 8 -0.13 0.00
 17 13 9 -8.03 0.00
 17 13 10 -2.55 0.00
 17 13 11 8.79 0.00
 17 13 12 4.44 0.00
 17 13 13 0.03 0.00
 17 13 14 0.71 0.00
 17 15 1 0.13 0.00
 17 15 2 -1.50 0.00
 17 15 3 1.82 0.00
 17 15 4 -0.87 0.00
 17 15 5 -2.49 0.00
 17 15 6 -6.79 0.00
 17 15 7 -5.45 0.00
 17 15 8 2.10 0.00
 17 15 9 1.35 0.00
 17 15 10 5.64 0.00
 17 15 11 4.66 0.00
 17 15 12 -2.19 0.00
 17 15 13 4.94 0.00
 17 15 14 3.13 0.00
 17 17 1 4.80 0.00
 17 17 2 -4.04 0.00
 17 17 3 -6.70 0.00
 17 17 4 -5.04 0.00
 17 17 5 -3.85 0.00
 17 17 6 -2.80 0.00
 17 17 7 -3.93 0.00
 17 17 8 3.43 0.00
 17 17 9 -0.15 0.00
 17 17 10 -0.80 0.00
 17 17 11 -4.37 0.00
 17 17 12 2.64 0.00
 17 17 13 2.15 0.00
 17 17 14 5.86 0.00
 17 19 1 -9.08 0.00
 17 19 2 -2.84 0.00
 17 19 3 2.03 0.00
 17 19 4 3.94 0.00
 17 19 5 0.02 0.00
 17 19 6 -3.37 0.00
 17 19 7 0.71 0.00
 17 19 8 -2.10 0.00
 17 19 9 -0.06 0.00
 17 19 10 5.43 0.00
 17 19 11 -5.83 0.00
 17 19 12 -6.31 0.00
 17 19 13 5.94 0.00
 17 21 1 -5.01 0.00
 17 21 2 0.08 0.00
 17 21 3 6.33 0.00
 17 21 4 -3.86 0.00
 17 21 5 -5.29 0.00
 17 21 6 -3.66 0.00
 17 21 7 -2.99 0.00
 17 21 8 -2.61 0.00
 17 21 9 3.40 0.00
 17 21 10 2.18 0.00
 17 21 11 9.80 0.00
 17 21 12 1.09 0.00
 17 21 13 -2.45 0.00
 17 23 1 -0.71 0.00
 17 23 2 5.18 0.00
 17 23 3 -4.00 0.00
 17 23 4 -0.88 0.00
 17 23 5 1.81 0.00
 17 23 6 -0.36 0.00
 17 23 7 -2.99 0.00
 17 23 8 3.32 0.00
 17 23 9 2.54 0.00
 17 23 10 2.08 0.00
 17 23 11 -9.89 0.00
 17 23 12 5.70 0.00
 17 25 1 -2.52 0.00
 17 25 2 -3.25 0.00
 17 25 3 4.47 0.00
 17 25 4 3.63 0.00
 17 25 5 -5.38 0.00
 17 25 6 -4.97 0.00
 17 25 7 -1.62 0.00
 17 25 8 1.26 0.00
 17 25 9 0.82 0.00
 17 25 10 0.80 0.00
 17 25 11 12.99 0.00
 17 27 1 0.94 0.00
 17 27 2 2.32 0.00
 17 27 3 -1.86 0.00
 17 27 4 0.27 0.00
 17 27 5 1.07 0.00
 17 27 6 2.10 0.00
 17 27 7 2.73 0.00
 17 27 8 -1.60 0.00
 17 27 9 0.60 0.00
 17 27 10 4.59 0.00
 17 29 1 4.55 0.00
 17 29 2 -1.01 0.00
 17 29 3 2.96 0.00
 17 29 4 4.66 0.00
 17 29 5 4.47 0.00
 17 29 6 -1.15 0.00
 17 29 7 -8.68 0.00
 17 29 8 2.18 0.00
 17 31 1 -3.37 0.00
 17 31 2 -2.41 0.00
 17 31 3 5.16 0.00
 17 31 4 3.43 0.00
 17 31 5 -1.58 0.00
 17 31 6 -3.43 0.00
 17 31 7 0.66 0.00
 17 33 1 1.44 0.00
 17 33 2 5.53 0.00
 17 33 3 -0.83 0.00
 17 33 4 -3.48 0.00
 17 33 5 -0.85 0.00
 17 33 6 -2.24 0.00
 17 35 1 0.49 0.00
 17 35 2 1.04 0.00
 17 35 3 1.63 0.00
 17 35 4 -0.96 0.00
 17 35 5 0.45 0.00
 17 37 1 -5.00 0.00
 17 37 2 -1.00 0.00
 18 0 0 14.30 0.00
 18 0 1 4.46 0.00
 18 0 2 -1.14 0.00
 18 0 3 2.43 0.00
 18 0 4 -7.11 0.00
 18 0 5 -8.43 0.00
 18 0 6 2.69 0.00
 18 0 7 -0.55 0.00
 18 0 8 1.26 0.00
 18 0 9 1.38 0.00
 18 0 10 0.79 0.00
 18 0 11 -7.06 0.00
 18 0 12 -4.27 0.00
 18 0 13 -1.72 0.00
 18 0 14 -3.71 0.00
 18 2 0 8.21 0.00
 18 2 1 -7.38 0.00
 18 2 2 -1.01 0.00
 18 2 3 -3.44 0.00
 18 2 4 4.70 0.00
 18 2 5 -2.69 0.00
 18 2 6 -6.93 0.00
 18 2 7 -4.98 0.00
 18 2 8 -1.96 0.00
 18 2 9 -4.24 0.00
 18 2 10 -2.52 0.00
 18 2 11 -0.90 0.00
 18 2 12 -0.26 0.00
 18 2 13 -0.97 0.00
 18 2 14 0.48 0.00
 18 4 0 14.28 0.00
 18 4 1 1.76 0.00
 18 4 2 -5.73 0.00
 18 4 3 7.16 0.00
 18 4 4 -6.75 0.00
 18 4 5 -6.47 0.00
 18 4 6 -0.58 0.00
 18 4 7 -4.91 0.00
 18 4 8 -4.26 0.00
 18 4 9 -3.31 0.00
 18 4 10 2.43 0.00
 18 4 11 -2.86 0.00
 18 4 12 -8.17 0.00
 18 4 13 -4.97 0.00
 18 4 14 -5.68 0.00
 18 6 0 2.78 0.00
 18 6 1 2.73 0.00
 18 6 2 11.00 0.00
 18 6 3 -1.16 0.00
 18 6 4 2.08 0.00
 18 6 5 -1.12 0.00
 18 6 6 -6.86 0.00
 18 6 7 -3.77 0.00
 18 6 8 -3.23 0.00
 18 6 9 -4.71 0.00
 18 6 10 -8.36 0.00
 18 6 11 -2.58 0.00
 18 6 12 -1.46 0.00
 18 6 13 1.24 0.00
 18 6 14 3.48 0.00
 18 8 0 5.53 0.00
 18 8 1 1.20 0.00
 18 8 2 -2.36 0.00
 18 8 3 -4.12 0.00
 18 8 4 -9.17 0.00
 18 8 5 -0.06 0.00
 18 8 6 -5.17 0.00
 18 8 7 -2.55 0.00
 18 8 8 -1.72 0.00
 18 8 9 1.28 0.00
 18 8 10 -0.77 0.00
 18 8 11 -1.09 0.00
 18 8 12 -5.16 0.00
 18 8 13 -1.44 0.00
 18 8 14 -0.98 0.00
 18 10 0 -0.35 0.00
 18 10 1 4.42 0.00
 18 10 2 1.46 0.00
 18 10 3 1.24 0.00
 18 10 4 1.97 0.00
 18 10 5 -4.26 0.00
 18 10 6 -0.61 0.00
 18 10 7 -2.64 0.00
 18 10 8 -4.42 0.00
 18 10 9 0.56 0.00
 18 10 10 -10.55 0.00
 18 10 11 -0.60 0.00
 18 10 12 1.64 0.00
 18 10 13 -1.35 0.00
 18 10 14 4.37 0.00
 18 12 0 -4.25 0.00
 18 12 1 -2.51 0.00
 18 12 2 1.60 0.00
 18 12 3 3.01 0.00
 18 12 4 -5.64 0.00
 18 12 5 -4.76 0.00
 18 12 6 2.06 0.00
 18 12 7 0.09 0.00
 18 12 8 -2.23 0.00
 18 12 9 -3.27 0.00
 18 12 10 11.99 0.00
 18 12 11 2.32 0.00
 18 12 12 -4.33 0.00
 18 12 13 -0.17 0.00
 18 12 14 0.67 0.00
 18 14 0 -2.17 0.00
 18 14 1 -0.62 0.00
 18 14 2 -0.51 0.00
 18 14 3 -6.12 0.00
 18 14 4 -7.65 0.00
 18 14 5 -3.45 0.00
 18 14 6 -2.10 0.00
 18 14 7 -2.24 0.00
 18 14 8 3.19 0.00
 18 14 9 2.29 0.00
 18 14 10 -5.34 0.00
 18 14 11 -1.95 0.00
 18 14 12 1.89 0.00
 18 14 13 -1.13 0.00
 18 16 0 -13.51 0.00
 18 16 1 -4.68 0.00
 18 16 2 3.73 0.00
 18 16 3 0.27 0.00
 18 16 4 -0.11 0.00
 18 16 5 -3.23 0.00
 18 16 6 0.24 0.00
 18 16 7 1.36 0.00
 18 16 8 1.73 0.00
 18 16 9 0.54 0.00
 18 16 10 3.84 0.00
 18 16 11 -1.33 0.00
 18 16 12 -2.43 0.00
 18 16 13 -0.82 0.00
 18 18 0 0.46 0.00
 18 18 1 -4.30 0.00
 18 18 2 -5.05 0.00
 18 18 3 -2.36 0.00
 18 18 4 -3.49 0.00
 18 18 5 -3.87 0.00
 18 18 6 -3.23 0.00
 18 18 7 -2.20 0.00
 18 18 8 -4.17 0.00
 18 18 9 0.70 0.00
 18 18 10 -0.13 0.00
 18 18 11 1.45 0.00
 18 18 12 5.79 0.00
 18 18 13 1.63 0.00
 18 20 0 -1.25 0.00
 18 20 1 -1.29 0.00
 18 20 2 -1.30 0.00
 18 20 3 -9.79 0.00
 18 20 4 1.15 0.00
 18 20 5 0.58 0.00
 18 20 6 -5.58 0.00
 18 20 7 -3.22 0.00
 18 20 8 6.69 0.00
 18 20 9 -0.72 0.00
 18 20 10 1.49 0.00
 18 20 11 0.70 0.00
 18 20 12 -1.51 0.00
 18 22 0 -2.21 0.00
 18 22 1 -4.20 0.00
 18 22 2 -4.55 0.00
 18 22 3 11.85 0.00
 18 22 4 -4.18 0.00
 18 22 5 -2.42 0.00
 18 22 6 -3.71 0.00
 18 22 7 1.23 0.00
 18 22 8 -2.46 0.00
 18 22 9 -1.43 0.00
 18 22 10 -4.62 0.00
 18 22 11 2.86 0.00
 18 24 0 -3.97 0.00
 18 24 1 -10.12 0.00
 18 24 2 -2.17 0.00
 18 24 3 1.62 0.00
 18 24 4 -3.36 0.00
 18 24 5 -6.60 0.00
 18 24 6 5.13 0.00
 18 24 7 2.13 0.00
 18 24 8 0.91 0.00
 18 24 9 1.19 0.00
 18 24 10 15.27 0.00
 18 26 0 1.04 0.00
 18 26 1 5.27 0.00
 18 26 2 -8.27 0.00
 18 26 3 0.84 0.00
 18 26 4 1.70 0.00
 18 26 5 4.76 0.00
 18 26 6 -2.87 0.00
 18 26 7 -1.55 0.00
 18 26 8 -1.34 0.00
 18 26 9 -1.74 0.00
 18 28 0 -4.03 0.00
 18 28 1 -8.08 0.00
 18 28 2 2.60 0.00
 18 28 3 -0.51 0.00
 18 28 4 -8.08 0.00
 18 28 5 -5.97 0.00
 18 28 6 8.21 0.00
 18 28 7 9.67 0.00
 18 28 8 6.96 0.00
 18 30 0 -8.50 0.00
 18 30 1 2.53 0.00
 18 30 2 -1.16 0.00
 18 30 3 -8.71 0.00
 18 30 4 1.82 0.00
 18 30 5 2.21 0.00
 18 30 6 0.33 0.00
 18 30 7 -3.17 0.00
 18 32 0 -0.39 0.00
 18 32 1 2.44 0.00
 18 32 2 2.75 0.00
 18 32 3 -5.65 0.00
 18 32 4 -1.50 0.00
 18 32 5 1.35 0.00
 18 32 6 0.23 0.00
 18 34 0 -10.34 0.00
 18 34 1 -3.86 0.00
 18 34 2 8.01 0.00
 18 34 3 1.62 0.00
 18 34 4 -6.43 0.00
 19 1 1 -12.07 0.00
 19 1 2 4.87 0.00
 19 1 3 -1.65 0.00
 19 1 4 1.88 0.00
 19 1 5 2.21 0.00
 19 1 6 -2.51 0.00
 19 1 7 1.06 0.00
 19 1 8 -5.99 0.00
 19 1 9 -2.78 0.00
 19 1 10 0.96 0.00
 19 1 11 -3.47 0.00
 19 1 12 -2.67 0.00
 19 1 13 -0.90 0.00
 19 3 1 6.72 0.00
 19 3 2 -0.40 0.00
 19 3 3 -0.21 0.00
 19 3 4 -6.12 0.00
 19 3 5 -3.32 0.00
 19 3 6 0.34 0.00
 19 3 7 0.37 0.00
 19 3 8 0.07 0.00
 19 3 9 -0.36 0.00
 19 3 10 0.58 0.00
 19 3 11 0.06 0.00
 19 3 12 -1.92 0.00
 19 3 13 -3.58 0.00
 19 5 1 4.10 0.00
 19 5 2 2.38 0.00
 19 5 3 -9.54 0.00
 19 5 4 -1.98 0.00
 19 5 5 -3.18 0.00
 19 5 6 -2.89 0.00
 19 5 7 2.11 0.00
 19 5 8 -4.73 0.00
 19 5 9 -1.70 0.00
 19 5 10 -1.97 0.00
 19 5 11 -2.59 0.00
 19 5 12 -1.99 0.00
 19 5 13 1.92 0.00
 19 7 1 -10.89 0.00
 19 7 2 -2.57 0.00
 19 7 3 3.27 0.00
 19 7 4 0.25 0.00
 19 7 5 3.16 0.00
 19 7 6 0.28 0.00
 19 7 7 -0.69 0.00
 19 7 8 -1.31 0.00
 19 7 9 2.58 0.00
 19 7 10 -2.05 0.00
 19 7 11 -10.79 0.00
 19 7 12 -4.88 0.00
 19 7 13 1.10 0.00
 19 9 1 0.64 0.00
 19 9 2 6.33 0.00
 19 9 3 2.30 0.00
 19 9 4 -13.28 0.00
 19 9 5 -10.13 0.00
 19 9 6 -1.74 0.00
 19 9 7 0.25 0.00
 19 9 8 -0.48 0.00
 19 9 9 -3.06 0.00
 19 9 10 -1.65 0.00
 19 9 11 11.88 0.00
 19 9 12 0.48 0.00
 19 9 13 -1.47 0.00
 19 11 1 -10.78 0.00
 19 11 2 -1.56 0.00
 19 11 3 -5.18 0.00
 19 11 4 -0.25 0.00
 19 11 5 3.77 0.00
 19 11 6 -5.38 0.00
 19 11 7 -9.62 0.00
 19 11 8 4.18 0.00
 19 11 9 0.23 0.00
 19 11 10 -0.18 0.00
 19 11 11 -14.05 0.00
 19 11 12 2.20 0.00
 19 11 13 0.83 0.00
 19 13 1 5.69 0.00
 19 13 2 0.83 0.00
 19 13 3 -7.43 0.00
 19 13 4 -2.01 0.00
 19 13 5 -3.17 0.00
 19 13 6 -2.65 0.00
 19 13 7 -5.46 0.00
 19 13 8 0.40 0.00
 19 13 9 2.85 0.00
 19 13 10 -0.84 0.00
 19 13 11 3.68 0.00
 19 13 12 -5.45 0.00
 19 13 13 9.74 0.00
 19 15 1 0.12 0.00
 19 15 2 -1.45 0.00
 19 15 3 -1.29 0.00
 19 15 4 -2.73 0.00
 19 15 5 -3.57 0.00
 19 15 6 0.26 0.00
 19 15 7 -4.41 0.00
 19 15 8 -2.20 0.00
 19 15 9 -6.90 0.00
 19 15 10 0.45 0.00
 19 15 11 -3.56 0.00
 19 15 12 3.32 0.00
 19 17 1 -9.78 0.00
 19 17 2 -2.33 0.00
 19 17 3 0.19 0.00
 19 17 4 3.36 0.00
 19 17 5 -2.61 0.00
 19 17 6 -4.12 0.00
 19 17 7 -4.40 0.00
 19 17 8 -0.55 0.00
 19 17 9 -1.66 0.00
 19 17 10 2.34 0.00
 19 17 11 0.44 0.00
 19 17 12 -6.30 0.00
 19 19 1 5.30 0.00
 19 19 2 -4.19 0.00
 19 19 3 -4.13 0.00
 19 19 4 -1.91 0.00
 19 19 5 0.23 0.00
 19 19 6 -2.25 0.00
 19 19 7 -0.55 0.00
 19 19 8 1.16 0.00
 19 19 9 -2.04 0.00
 19 19 10 2.04 0.00
 19 19 11 -9.17 0.00
 19 21 1 -6.88 0.00
 19 21 2 6.06 0.00
 19 21 3 -1.38 0.00
 19 21 4 -2.64 0.00
 19 21 5 1.22 0.00
 19 21 6 -1.86 0.00
 19 21 7 -2.33 0.00
 19 21 8 1.24 0.00
 19 21 9 -0.27 0.00
 19 21 10 -2.64 0.00
 19 21 11 8.24 0.00
 19 23 1 -2.27 0.00
 19 23 2 -2.68 0.00
 19 23 3 6.78 0.00
 19 23 4 0.60 0.00
 19 23 5 -6.05 0.00
 19 23 6 -1.72 0.00
 19 23 7 -2.48 0.00
 19 23 8 -0.07 0.00
 19 23 9 -0.13 0.00
 19 23 10 8.63 0.00
 19 25 1 1.39 0.00
 19 25 2 2.06 0.00
 19 25 3 -7.09 0.00
 19 25 4 -3.31 0.00
 19 25 5 -1.25 0.00
 19 25 6 -0.43 0.00
 19 25 7 -0.63 0.00
 19 25 8 0.09 0.00
 19 27 1 -3.69 0.00
 19 27 2 -0.98 0.00
 19 27 3 6.98 0.00
 19 27 4 6.24 0.00
 19 27 5 -1.46 0.00
 19 27 6 -4.83 0.00
 19 27 7 -6.36 0.00
 19 29 1 1.64 0.00
 19 29 2 -1.33 0.00
 19 29 3 1.77 0.00
 19 29 4 0.21 0.00
 19 29 5 -0.25 0.00
 19 29 6 0.33 0.00
 19 31 1 7.06 0.00
 19 31 2 1.40 0.00
 19 31 3 -4.48 0.00
 19 31 4 -3.25 0.00
 19 31 5 -0.81 0.00
 19 33 1 -7.82 0.00
 19 33 2 4.14 0.00
 19 33 3 5.71 0.00
 20 0 0 9.39 0.00
 20 0 1 4.36 0.00
 20 0 2 0.65 0.00
 20 0 3 -2.38 0.00
 20 0 4 6.30 0.00
 20 0 5 1.71 0.00
 20 0 6 -1.36 0.00
 20 0 7 -1.09 0.00
 20 0 8 -2.68 0.00
 20 0 9 3.13 0.00
 20 0 10 2.92 0.00
 20 0 11 -3.28 0.00
 20 0 12 1.51 0.00
 20 2 0 1.59 0.00
 20 2 1 -11.34 0.00
 20 2 2 -3.50 0.00
 20 2 3 3.87 0.00
 20 2 4 -4.52 0.00
 20 2 5 -5.92 0.00
 20 2 6 3.07 0.00
 20 2 7 -0.76 0.00
 20 2 8 5.36 0.00
 20 2 9 -2.71 0.00
 20 2 10 0.17 0.00
 20 2 11 -0.26 0.00
 20 2 12 -0.79 0.00
 20 4 0 1.73 0.00
 20 4 1 0.80 0.00
 20 4 2 -3.48 0.00
 20 4 3 -2.04 0.00
 20 4 4 5.63 0.00
 20 4 5 2.06 0.00
 20 4 6 -1.91 0.00
 20 4 7 -1.65 0.00
 20 4 8 -2.56 0.00
 20 4 9 -1.37 0.00
 20 4 10 -1.81 0.00
 20 4 11 0.22 0.00
 20 4 12 1.15 0.00
 20 6 0 5.97 0.00
 20 6 1 2.44 0.00
 20 6 2 3.67 0.00
 20 6 3 2.44 0.00
 20 6 4 -4.94 0.00
 20 6 5 3.93 0.00
 20 6 6 -0.29 0.00
 20 6 7 -0.16 0.00
 20 6 8 -1.57 0.00
 20 6 9 -1.57 0.00
 20 6 10 -4.87 0.00
 20 6 11 -1.86 0.00
 20 6 12 -2.80 0.00
 20 8 0 -13.56 0.00
 20 8 1 -7.15 0.00
 20 8 2 4.05 0.00
 20 8 3 -3.10 0.00
 20 8 4 -3.33 0.00
 20 8 5 -2.84 0.00
 20 8 6 1.60 0.00
 20 8 7 0.04 0.00
 20 8 8 -2.24 0.00
 20 8 9 2.86 0.00
 20 8 10 3.71 0.00
 20 8 11 -0.58 0.00
 20 8 12 -6.29 0.00
 20 10 0 8.06 0.00
 20 10 1 5.87 0.00
 20 10 2 -5.28 0.00
 20 10 3 1.76 0.00
 20 10 4 -0.10 0.00
 20 10 5 1.91 0.00
 20 10 6 -2.15 0.00
 20 10 7 3.13 0.00
 20 10 8 0.71 0.00
 20 10 9 -1.00 0.00
 20 10 10 -6.95 0.00
 20 10 11 -0.69 0.00
 20 10 12 0.27 0.00
 20 12 0 -3.36 0.00
 20 12 1 -2.17 0.00
 20 12 2 -0.01 0.00
 20 12 3 2.12 0.00
 20 12 4 -1.89 0.00
 20 12 5 -3.75 0.00
 20 12 6 7.73 0.00
 20 12 7 -1.70 0.00
 20 12 8 1.99 0.00
 20 12 9 -0.94 0.00
 20 12 10 1.52 0.00
 20 12 11 -2.92 0.00
 20 12 12 1.31 0.00
 20 14 0 -11.56 0.00
 20 14 1 -4.26 0.00
 20 14 2 6.47 0.00
 20 14 3 2.33 0.00
 20 14 4 -4.91 0.00
 20 14 5 -4.28 0.00
 20 14 6 1.02 0.00
 20 14 7 0.94 0.00
 20 14 8 0.61 0.00
 20 14 9 -0.40 0.00
 20 14 10 -0.06 0.00
 20 14 11 -0.04 0.00
 20 16 0 6.63 0.00
 20 16 1 4.16 0.00
 20 16 2 -5.94 0.00
 20 16 3 -3.45 0.00
 20 16 4 2.99 0.00
 20 16 5 3.18 0.00
 20 16 6 -0.86 0.00
 20 16 7 1.93 0.00
 20 16 8 3.29 0.00
 20 16 9 3.99 0.00
 20 16 10 -5.80 0.00
 20 16 11 -1.96 0.00
 20 18 0 -4.43 0.00
 20 18 1 -9.28 0.00
 20 18 2 3.17 0.00
 20 18 3 1.08 0.00
 20 18 4 2.03 0.00
 20 18 5 -1.68 0.00
 20 18 6 -1.27 0.00
 20 18 7 -1.06 0.00
 20 18 8 -0.60 0.00
 20 18 9 -1.96 0.00
 20 18 10 0.61 0.00
 20 20 0 0.61 0.00
 20 20 1 0.36 0.00
 20 20 2 2.24 0.00
 20 20 3 -0.31 0.00
 20 20 4 -0.27 0.00
 20 20 5 -0.92 0.00
 20 20 6 0.95 0.00
 20 20 7 -0.93 0.00
 20 20 8 -2.84 0.00
 20 20 9 0.02 0.00
 20 20 10 2.71 0.00
 20 22 0 2.93 0.00
 20 22 1 -1.28 0.00
 20 22 2 -5.62 0.00
 20 22 3 4.82 0.00
 20 22 4 -1.03 0.00
 20 22 5 3.25 0.00
 20 22 6 -3.50 0.00
 20 22 7 2.99 0.00
 20 22 8 -1.10 0.00
 20 22 9 -1.05 0.00
 20 24 0 -1.40 0.00
 20 24 1 -3.93 0.00
 20 24 2 -2.50 0.00
 20 24 3 0.63 0.00
 20 24 4 3.00 0.00
 20 24 5 -3.89 0.00
 20 24 6 4.95 0.00
 20 24 7 -3.96 0.00
 20 26 0 -1.65 0.00
 20 26 1 3.21 0.00
 20 26 2 -4.01 0.00
 20 26 3 2.18 0.00
 20 26 4 -4.72 0.00
 20 26 5 3.38 0.00
 20 26 6 -2.82 0.00
 20 28 0 1.13 0.00
 20 28 1 0.74 0.00
 20 28 2 -5.25 0.00
 20 28 3 -5.16 0.00
 20 28 4 5.33 0.00
 20 28 5 -1.84 0.00
 20 30 0 -4.13 0.00
 20 30 1 -3.33 0.00
 20 30 2 2.19 0.00
 20 30 3 -4.91 0.00
 21 1 1 9.10 0.00
 21 1 2 4.13 0.00
 21 1 3 3.07 0.00
 21 1 4 -2.56 0.00
 21 1 5 -1.76 0.00
 21 1 6 0.50 0.00
 21 1 7 2.83 0.00
 21 1 8 -0.24 0.00
 21 1 9 0.17 0.00
 21 1 10 1.87 0.00
 21 1 11 -1.07 0.00
 21 3 1 -8.50 0.00
 21 3 2 -2.32 0.00
 21 3 3 1.92 0.00
 21 3 4 5.79 0.00
 21 3 5 -5.75 0.00
 21 3 6 -5.34 0.00
 21 3 7 -2.36 0.00
 21 3 8 -1.27 0.00
 21 3 9 1.67 0.00
 21 3 10 -1.33 0.00
 21 3 11 -6.33 0.00
 21 5 1 -3.10 0.00
 21 5 2 1.27 0.00
 21 5 3 -2.18 0.00
 21 5 4 0.33 0.00
 21 5 5 1.80 0.00
 21 5 6 1.60 0.00
 21 5 7 1.87 0.00
 21 5 8 -0.50 0.00
 21 5 9 -4.85 0.00
 21 5 10 -1.11 0.00
 21 5 11 -0.48 0.00
 21 7 1 2.41 0.00
 21 7 2 3.44 0.00
 21 7 3 0.39 0.00
 21 7 4 -5.64 0.00
 21 7 5 0.20 0.00
 21 7 6 0.97 0.00
 21 7 7 1.55 0.00
 21 7 8 0.75 0.00
 21 7 9 2.68 0.00
 21 7 10 -1.62 0.00
 21 7 11 -2.50 0.00
 21 9 1 -9.95 0.00
 21 9 2 -1.65 0.00
 21 9 3 -0.70 0.00
 21 9 4 1.11 0.00
 21 9 5 3.96 0.00
 21 9 6 0.47 0.00
 21 9 7 -4.13 0.00
 21 9 8 0.03 0.00
 21 9 9 3.68 0.00
 21 9 10 1.60 0.00
 21 9 11 -13.13 0.00
 21 11 1 5.68 0.00
 21 11 2 2.37 0.00
 21 11 3 -0.53 0.00
 21 11 4 -5.89 0.00
 21 11 5 -0.41 0.00
 21 11 6 -0.95 0.00
 21 11 7 -5.54 0.00
 21 11 8 2.17 0.00
 21 11 9 2.51 0.00
 21 11 10 1.94 0.00
 21 11 11 -6.34 0.00
 21 13 1 -6.19 0.00
 21 13 2 -0.27 0.00
 21 13 3 -3.22 0.00
 21 13 4 2.22 0.00
 21 13 5 2.64 0.00
 21 13 6 1.52 0.00
 21 13 7 -2.30 0.00
 21 13 8 4.11 0.00
 21 13 9 -6.17 0.00
 21 13 10 -2.21 0.00
 21 15 1 -5.08 0.00
 21 15 2 1.20 0.00
 21 15 3 4.62 0.00
 21 15 4 3.30 0.00
 21 15 5 0.06 0.00
 21 15 6 -0.84 0.00
 21 15 7 -4.29 0.00
 21 15 8 0.97 0.00
 21 15 9 2.42 0.00
 21 15 10 -5.13 0.00
 21 17 1 5.09 0.00
 21 17 2 5.75 0.00
 21 17 3 -3.75 0.00
 21 17 4 -1.38 0.00
 21 17 5 0.43 0.00
 21 17 6 1.49 0.00
 21 17 7 -2.14 0.00
 21 17 8 -0.44 0.00
 21 17 9 -2.91 0.00
 21 19 1 -3.41 0.00
 21 19 2 -1.50 0.00
 21 19 3 -0.72 0.00
 21 19 4 4.21 0.00
 21 19 5 2.35 0.00
 21 19 6 1.35 0.00
 21 19 7 2.31 0.00
 21 19 8 2.82 0.00
 21 21 1 1.88 0.00
 21 21 2 6.78 0.00
 21 21 3 1.66 0.00
 21 21 4 -4.13 0.00
 21 21 5 -0.48 0.00
 21 21 6 0.94 0.00
 21 21 7 2.96 0.00
 21 23 1 1.10 0.00
 21 23 2 2.50 0.00
 21 23 3 -5.63 0.00
 21 23 4 -1.38 0.00
 21 23 5 3.15 0.00
 21 23 6 -0.39 0.00
 21 25 1 -3.40 0.00
 21 25 2 -4.86 0.00
 21 25 3 10.42 0.00
 21 25 4 7.34 0.00
 21 25 5 -7.09 0.00
 21 27 1 5.22 0.00
 21 27 2 5.15 0.00
 21 27 3 -9.74 0.00
 21 27 4 -10.48 0.00
 22 0 1 -2.86 0.00
 22 0 2 -0.81 0.00
 22 0 3 6.50 0.00
 22 0 4 0.21 0.00
 22 0 5 -0.83 0.00
 22 0 6 5.81 0.00
 22 0 7 2.52 0.00
 22 0 8 3.21 0.00
 22 0 9 -1.56 0.00
 22 0 10 -5.32 0.00
 22 2 0 2.55 0.00
 22 2 1 0.83 0.00
 22 2 2 0.52 0.00
 22 2 3 -3.61 0.00
 22 2 4 3.20 0.00
 22 2 5 1.39 0.00
 22 2 6 -0.06 0.00
 22 2 7 0.64 0.00
 22 2 8 2.44 0.00
 22 2 9 3.66 0.00
 22 2 10 4.48 0.00
 22 4 0 -0.31 0.00
 22 4 1 0.74 0.00
 22 4 2 -1.12 0.00
 22 4 3 0.81 0.00
 22 4 4 2.14 0.00
 22 4 5 5.25 0.00
 22 4 6 1.69 0.00
 22 4 7 -0.97 0.00
 22 4 8 -3.32 0.00
 22 4 9 -3.25 0.00
 22 4 10 3.72 0.00
 22 6 0 -1.56 0.00
 22 6 1 -0.93 0.00
 22 6 2 5.92 0.00
 22 6 3 3.20 0.00
 22 6 4 1.52 0.00
 22 6 5 3.92 0.00
 22 6 6 1.82 0.00
 22 6 7 7.19 0.00
 22 6 8 0.82 0.00
 22 6 9 1.03 0.00
 22 6 10 0.13 0.00
 22 8 0 2.29 0.00
 22 8 1 0.91 0.00
 22 8 2 0.19 0.00
 22 8 3 0.12 0.00
 22 8 4 -3.76 0.00
 22 8 5 -4.15 0.00
 22 8 6 2.29 0.00
 22 8 7 -0.28 0.00
 22 8 8 1.83 0.00
 22 8 9 0.80 0.00
 22 8 10 -3.84 0.00
 22 10 0 -6.62 0.00
 22 10 1 -2.51 0.00
 22 10 2 6.29 0.00
 22 10 3 6.03 0.00
 22 10 4 -1.66 0.00
 22 10 5 0.93 0.00
 22 10 6 3.48 0.00
 22 10 7 3.47 0.00
 22 10 8 -1.64 0.00
 22 10 9 2.64 0.00
 22 10 10 1.17 0.00
 22 12 0 4.28 0.00
 22 12 1 5.06 0.00
 22 12 2 -0.29 0.00
 22 12 3 -1.19 0.00
 22 12 4 6.95 0.00
 22 12 5 2.27 0.00
 22 12 6 0.09 0.00
 22 12 7 -4.13 0.00
 22 12 8 3.23 0.00
 22 12 9 -1.81 0.00
 22 14 0 3.64 0.00
 22 14 1 0.39 0.00
 22 14 2 -2.56 0.00
 22 14 3 0.09 0.00
 22 14 4 -2.27 0.00
 22 14 5 2.04 0.00
 22 14 6 -2.19 0.00
 22 14 7 -8.73 0.00
 22 14 8 4.40 0.00
 22 14 9 5.06 0.00
 22 16 0 -3.96 0.00
 22 16 1 -1.03 0.00
 22 16 2 8.19 0.00
 22 16 3 8.82 0.00
 22 16 4 -0.75 0.00
 22 16 5 -5.45 0.00
 22 16 6 3.96 0.00
 22 16 7 5.52 0.00
 22 16 8 -2.99 0.00
 22 18 0 6.33 0.00
 22 18 1 -2.34 0.00
 22 18 2 -4.23 0.00
 22 18 3 -2.34 0.00
 22 18 4 2.56 0.00
 22 18 5 -1.24 0.00
 22 18 6 -5.66 0.00
 22 18 7 -2.75 0.00
 22 20 0 1.78 0.00
 22 20 1 -1.32 0.00
 22 20 2 4.30 0.00
 22 20 3 -1.12 0.00
 22 20 4 1.24 0.00
 22 20 5 0.78 0.00
 22 22 0 -0.45 0.00
 22 22 1 0.25 0.00
 22 22 2 -4.56 0.00
 22 22 3 4.58 0.00
 22 22 4 -1.52 0.00
 22 24 0 7.49 0.00
 22 24 1 -1.67 0.00
 22 24 2 -1.72 0.00
 22 24 3 -2.67 0.00
 23 1 1 -3.11 0.00
 23 1 2 -1.98 0.00
 23 1 3 -1.57 0.00
 23 1 4 7.36 0.00
 23 1 5 -3.46 0.00
 23 1 6 -2.39 0.00
 23 1 7 -3.01 0.00
 23 1 8 -2.38 0.00
 23 1 9 3.57 0.00
 23 3 1 1.91 0.00
 23 3 2 2.87 0.00
 23 3 3 2.66 0.00
 23 3 4 2.18 0.00
 23 3 5 1.44 0.00
 23 3 6 -1.29 0.00
 23 3 7 -0.85 0.00
 23 3 8 0.89 0.00
 23 3 9 -0.44 0.00
 23 5 1 -0.54 0.00
 23 5 2 2.33 0.00
 23 5 3 -0.98 0.00
 23 5 4 1.78 0.00
 23 5 5 0.15 0.00
 23 5 6 2.34 0.00
 23 5 7 0.75 0.00
 23 5 8 -0.09 0.00
 23 5 9 -0.70 0.00
 23 7 1 -4.88 0.00
 23 7 2 -1.78 0.00
 23 7 3 0.65 0.00
 23 7 4 2.56 0.00
 23 7 5 4.67 0.00
 23 7 6 2.72 0.00
 23 7 7 -0.95 0.00
 23 7 8 -0.46 0.00
 23 7 9 3.88 0.00
 23 9 1 1.29 0.00
 23 9 2 -0.49 0.00
 23 9 3 2.40 0.00
 23 9 4 1.01 0.00
 23 9 5 3.91 0.00
 23 9 6 3.25 0.00
 23 9 7 -2.62 0.00
 23 9 8 0.27 0.00
 23 11 1 -8.12 0.00
 23 11 2 -1.93 0.00
 23 11 3 1.86 0.00
 23 11 4 -0.40 0.00
 23 11 5 0.47 0.00
 23 11 6 3.21 0.00
 23 11 7 -1.42 0.00
 23 11 8 -4.35 0.00
 23 13 1 2.41 0.00
 23 13 2 7.81 0.00
 23 13 3 0.65 0.00
 23 13 4 0.09 0.00
 23 13 5 1.55 0.00
 23 13 6 -4.41 0.00
 23 13 7 -1.02 0.00
 23 15 1 -1.17 0.00
 23 15 2 -0.74 0.00
 23 15 3 1.43 0.00
 23 15 4 -1.20 0.00
 23 15 5 2.25 0.00
 23 15 6 5.41 0.00
 23 17 1 -3.81 0.00
 23 17 2 4.74 0.00
 23 17 3 2.26 0.00
 23 17 4 5.51 0.00
 23 17 5 -3.00 0.00
 23 19 1 5.77 0.00
 23 19 2 5.55 0.00
 23 19 3 -5.30 0.00
 23 19 4 -2.07 0.00
 23 21 1 -5.71 0.00
 23 21 2 -0.26 0.00
 24 0 0 5.84 0.00
 24 0 1 3.78 0.00
 24 0 2 2.72 0.00
 24 0 3 -1.22 0.00
 24 0 4 0.49 0.00
 24 0 5 -1.21 0.00
 24 0 6 -0.05 0.00
 24 0 7 0.45 0.00
 24 2 0 -3.24 0.00
 24 2 1 -4.30 0.00
 24 2 2 -1.70 0.00
 24 2 3 -1.40 0.00
 24 2 4 0.40 0.00
 24 2 5 1.21 0.00
 24 2 6 2.71 0.00
 24 2 7 5.11 0.00
 24 4 0 -0.32 0.00
 24 4 1 -0.85 0.00
 24 4 2 -0.31 0.00
 24 4 3 -0.91 0.00
 24 4 4 -0.90 0.00
 24 4 5 3.36 0.00
 24 4 6 1.31 0.00
 24 4 7 0.43 0.00
 24 6 0 -0.96 0.00
 24 6 1 -0.74 0.00
 24 6 2 -0.78 0.00
 24 6 3 -0.21 0.00
 24 6 4 -0.26 0.00
 24 6 5 4.03 0.00
 24 6 6 2.13 0.00
 24 6 7 1.20 0.00
 24 8 0 -3.61 0.00
 24 8 1 -7.34 0.00
 24 8 2 -1.53 0.00
 24 8 3 -1.70 0.00
 24 8 4 2.55 0.00
 24 8 5 -0.09 0.00
 24 8 6 -2.53 0.00
 24 10 0 0.06 0.00
 24 10 1 3.56 0.00
 24 10 2 1.89 0.00
 24 10 3 -2.58 0.00
 24 10 4 0.22 0.00
 24 10 5 1.00 0.00
 24 10 6 2.68 0.00
 24 12 0 -3.72 0.00
 24 12 1 -3.87 0.00
 24 12 2 1.98 0.00
 24 12 3 2.90 0.00
 24 12 4 0.81 0.00
 24 12 5 -3.35 0.00
 24 14 0 -2.49 0.00
 24 14 1 -2.84 0.00
 24 14 2 4.53 0.00
 24 14 3 3.58 0.00
 24 14 4 -4.49 0.00
 24 16 0 7.45 0.00
 24 16 1 7.42 0.00
 24 16 2 -8.25 0.00
 24 16 3 -6.60 0.00
 24 18 0 -3.56 0.00
 24 18 1 -8.32 0.00
 25 1 1 5.29 0.00
 25 1 2 3.77 0.00
 25 1 3 -1.61 0.00
 25 1 4 -0.16 0.00
 25 3 1 -0.52 0.00
 25 3 2 0.48 0.00
 25 3 3 -5.81 0.00
 25 3 4 1.16 0.00
 25 5 1 1.12 0.00
 25 5 2 0.49 0.00
 25 5 3 1.07 0.00
 25 5 4 -1.17 0.00
 25 7 1 -3.36 0.00
 25 7 2 -3.44 0.00
 25 7 3 -2.47 0.00
 25 7 4 0.09 0.00
 25 9 1 -0.60 0.00
 25 9 2 -5.92 0.00
 25 9 3 -2.10 0.00
 25 11 1 -1.27 0.00
 25 11 2 3.07 0.00
 22 0 0 11.63 0.00
 0 2 0 -63.04 0.00
 24 20 0 -3.84 0.00
 24 22 0 8.08 0.00
 24 24 0 -4.60 0.00
 22 26 0 -9.33 0.00
 24 26 0 -6.60 0.00
 22 28 0 1.32 0.00
 24 28 0 -1.16 0.00
 22 30 0 -3.91 0.00
 20 32 0 -10.40 0.00
 22 32 0 6.66 0.00
 20 34 0 3.88 0.00
 22 34 0 -4.20 0.00
 18 36 0 8.34 0.00
 20 36 0 -2.24 0.00
 18 38 0 3.69 0.00
 20 38 0 -2.27 0.00
 16 40 0 7.98 0.00
 18 40 0 -1.98 0.00
 14 42 0 12.34 0.00
 16 42 0 4.60 0.00
 18 42 0 5.13 0.00
 12 44 0 6.98 0.00
 14 44 0 -5.76 0.00
 16 44 0 4.05 0.00
 10 46 0 6.98 0.00
 12 46 0 -2.08 0.00
 14 46 0 10.28 0.00
 0 48 0 9.41 0.00
 4 48 0 -10.94 0.00
 6 48 0 -1.81 0.00
 8 48 0 4.49 0.00
 10 48 0 1.39 0.00
 12 48 0 4.08 0.00
 14 48 0 -1.47 0.00
 0 0 1 22.30 0.00
 0 2 1 183.74 0.00
 25 13 1 -5.36 0.00
 25 15 1 -1.01 0.00
 25 17 1 3.73 0.00
 25 19 1 -4.26 0.00
 24 20 1 -3.24 0.00
 25 21 1 -2.96 0.00
 24 22 1 0.82 0.00
 23 23 1 2.52 0.00
 25 23 1 7.39 0.00
 24 24 1 -4.13 0.00
 23 25 1 10.95 0.00
 25 25 1 0.82 0.00
 22 26 1 7.16 0.00
 24 26 1 6.51 0.00
 23 27 1 -4.22 0.00
 22 28 1 0.70 0.00
 24 28 1 0.98 0.00
 21 29 1 2.52 0.00
 23 29 1 -0.94 0.00
 22 30 1 3.24 0.00
 21 31 1 -8.83 0.00
 23 31 1 0.08 0.00
 20 32 1 4.92 0.00
 22 32 1 -0.09 0.00
 21 33 1 -0.47 0.00
 20 34 1 -4.09 0.00
 22 34 1 -1.48 0.00
 19 35 1 -6.14 0.00
 21 35 1 -1.33 0.00
 18 36 1 4.71 0.00
 20 36 1 1.20 0.00
 19 37 1 3.62 0.00
 21 37 1 -2.80 0.00
 18 38 1 -2.76 0.00
 20 38 1 -1.51 0.00
 17 39 1 2.10 0.00
 19 39 1 -0.80 0.00
 16 40 1 2.22 0.00
 18 40 1 1.39 0.00
 15 41 1 -3.05 0.00
 17 41 1 2.53 0.00
 19 41 1 -2.36 0.00
 14 42 1 2.93 0.00
 16 42 1 0.44 0.00
 18 42 1 0.60 0.00
 13 43 1 -0.11 0.00
 15 43 1 5.29 0.00
 17 43 1 -0.75 0.00
 12 44 1 0.25 0.00
 14 44 1 -4.40 0.00
 16 44 1 1.34 0.00
 11 45 1 -1.17 0.00
 13 45 1 0.93 0.00
 15 45 1 -6.01 0.00
 10 46 1 3.88 0.00
 12 46 1 3.76 0.00
 14 46 1 5.68 0.00
 9 47 1 -2.57 0.00
 11 47 1 3.91 0.00
 13 47 1 -3.82 0.00
 0 48 1 -0.86 0.00
 6 48 1 5.17 0.00
 8 48 1 4.09 0.00
 10 48 1 2.74 0.00
 12 48 1 -1.35 0.00
 14 48 1 -0.09 0.00
 25 13 2 -3.64 0.00
 25 15 2 -1.15 0.00
 25 17 2 7.67 0.00
 24 18 2 3.17 0.00
 25 19 2 -1.22 0.00
 24 20 2 1.93 0.00
 25 21 2 2.88 0.00
 24 22 2 -7.09 0.00
 23 23 2 1.70 0.00
 25 23 2 0.16 0.00
 24 24 2 -1.32 0.00
 23 25 2 1.13 0.00
 25 25 2 -3.23 0.00
 22 26 2 -5.64 0.00
 24 26 2 -0.20 0.00
 23 27 2 -1.93 0.00
 22 28 2 5.17 0.00
 24 28 2 -1.91 0.00
 21 29 2 -1.37 0.00
 23 29 2 0.44 0.00
 22 30 2 -2.15 0.00
 21 31 2 -2.06 0.00
 23 31 2 0.17 0.00
 20 32 2 5.77 0.00
 22 32 2 -2.17 0.00
 21 33 2 0.12 0.00
 20 34 2 -2.29 0.00
 22 34 2 4.03 0.00
 19 35 2 -4.87 0.00
 21 35 2 -2.95 0.00
 18 36 2 -2.53 0.00
 20 36 2 2.42 0.00
 19 37 2 3.26 0.00
 21 37 2 -1.10 0.00
 18 38 2 -2.64 0.00
 20 38 2 -2.19 0.00
 17 39 2 -4.43 0.00
 19 39 2 -1.47 0.00
 16 40 2 1.44 0.00
 18 40 2 2.20 0.00
 15 41 2 -3.61 0.00
 17 41 2 -0.85 0.00
 14 42 2 2.18 0.00
 16 42 2 1.22 0.00
 18 42 2 2.22 0.00
 13 43 2 0.31 0.00
 15 43 2 -1.40 0.00
 17 43 2 -0.29 0.00
 12 44 2 -6.00 0.00
 14 44 2 3.59 0.00
 16 44 2 0.28 0.00
 11 45 2 -0.57 0.00
 13 45 2 -7.21 0.00
 15 45 2 -1.41 0.00
 10 46 2 -4.16 0.00
 12 46 2 8.45 0.00
 14 46 2 0.64 0.00
 9 47 2 -0.77 0.00
 11 47 2 -0.05 0.00
 13 47 2 2.73 0.00
 0 48 2 -7.11 0.00
 6 48 2 6.98 0.00
 8 48 2 2.96 0.00
 10 48 2 3.73 0.00
 12 48 2 -1.83 0.00
 0 4 3 127.32 0.00
 25 11 3 1.49 0.00
 25 13 3 -4.77 0.00
 25 15 3 7.46 0.00
 25 17 3 -6.72 0.00
 24 18 3 2.99 0.00
 25 19 3 0.53 0.00
 24 20 3 0.38 0.00
 23 21 3 0.01 0.00
 25 21 3 -0.02 0.00
 24 22 3 1.36 0.00
 23 23 3 1.80 0.00
 25 23 3 -3.35 0.00
 24 24 3 -6.25 0.00
 23 25 3 -5.68 0.00
 25 25 3 1.15 0.00
 22 26 3 -2.39 0.00
 24 26 3 0.96 0.00
 23 27 3 0.43 0.00
 22 28 3 -1.39 0.00
 24 28 3 -4.88 0.00
 21 29 3 2.64 0.00
 23 29 3 1.54 0.00
 22 30 3 -9.47 0.00
 21 31 3 2.33 0.00
 23 31 3 -3.53 0.00
 20 32 3 -6.78 0.00
 22 32 3 1.05 0.00
 21 33 3 -3.86 0.00
 20 34 3 -1.26 0.00
 22 34 3 0.79 0.00
 19 35 3 -0.30 0.00
 21 35 3 -1.85 0.00
 18 36 3 -5.35 0.00
 20 36 3 -1.40 0.00
 17 37 3 3.44 0.00
 19 37 3 2.77 0.00
 18 38 3 -0.99 0.00
 20 38 3 -1.61 0.00
 17 39 3 -5.23 0.00
 19 39 3 -2.64 0.00
 16 40 3 0.77 0.00
 18 40 3 -0.64 0.00
 15 41 3 -0.04 0.00
 17 41 3 -0.96 0.00
 14 42 3 2.80 0.00
 16 42 3 -2.13 0.00
 18 42 3 -0.75 0.00
 13 43 3 -1.29 0.00
 15 43 3 -0.38 0.00
 17 43 3 -1.11 0.00
 12 44 3 -0.57 0.00
 14 44 3 2.14 0.00
 16 44 3 3.43 0.00
 11 45 3 -3.55 0.00
 13 45 3 -1.66 0.00
 15 45 3 -2.60 0.00
 10 46 3 4.25 0.00
 12 46 3 0.12 0.00
 14 46 3 2.15 0.00
 9 47 3 1.89 0.00
 11 47 3 2.48 0.00
 13 47 3 0.79 0.00
 0 48 3 4.86 0.00
 6 48 3 -7.58 0.00
 8 48 3 0.91 0.00
 10 48 3 -4.23 0.00
 12 48 3 4.88 0.00
 25 9 4 -3.10 0.00
 25 11 4 -0.43 0.00
 25 13 4 -3.31 0.00
 25 15 4 2.42 0.00
 24 16 4 4.44 0.00
 25 17 4 -3.68 0.00
 24 18 4 0.40 0.00
 25 19 4 2.99 0.00
 24 20 4 -2.53 0.00
 23 21 4 -1.49 0.00
 25 21 4 -0.52 0.00
 24 22 4 -3.04 0.00
 23 23 4 4.42 0.00
 25 23 4 1.25 0.00
 22 24 4 -2.16 0.00
 24 24 4 4.10 0.00
 23 25 4 -10.41 0.00
 22 26 4 3.62 0.00
 24 26 4 -7.02 0.00
 23 27 4 3.54 0.00
 22 28 4 -7.91 0.00
 24 28 4 2.82 0.00
 21 29 4 4.53 0.00
 23 29 4 1.26 0.00
 20 30 4 -5.49 0.00
 22 30 4 4.83 0.00
 21 31 4 -3.02 0.00
 23 31 4 -3.40 0.00
 20 32 4 -1.61 0.00
 22 32 4 -1.06 0.00
 19 33 4 -4.10 0.00
 21 33 4 -4.18 0.00
 20 34 4 -3.30 0.00
 19 35 4 2.74 0.00
 21 35 4 1.04 0.00
 18 36 4 -4.59 0.00
 20 36 4 -3.48 0.00
 17 37 4 -2.31 0.00
 19 37 4 0.30 0.00
 18 38 4 1.82 0.00
 20 38 4 1.67 0.00
 17 39 4 1.00 0.00
 19 39 4 -3.45 0.00
 16 40 4 0.00 0.00
 18 40 4 -2.41 0.00
 15 41 4 0.65 0.00
 17 41 4 -2.89 0.00
 14 42 4 6.68 0.00
 16 42 4 5.46 0.00
 13 43 4 6.60 0.00
 15 43 4 -0.72 0.00
 17 43 4 -3.35 0.00
 12 44 4 0.57 0.00
 14 44 4 4.73 0.00
 16 44 4 2.98 0.00
 11 45 4 3.46 0.00
 13 45 4 -0.86 0.00
 15 45 4 -2.48 0.00
 10 46 4 3.07 0.00
 12 46 4 3.74 0.00
 14 46 4 5.13 0.00
 7 47 4 -3.03 0.00
 9 47 4 -1.19 0.00
 11 47 4 -3.36 0.00
 13 47 4 -1.00 0.00
 0 48 4 -2.18 0.00
 6 48 4 6.61 0.00
 8 48 4 6.67 0.00
 10 48 4 4.68 0.00
 12 48 4 4.38 0.00
 25 1 5 2.09 0.00
 25 3 5 -1.38 0.00
 25 5 5 2.79 0.00
 25 7 5 -6.63 0.00
 25 9 5 2.04 0.00
 25 11 5 -5.08 0.00
 25 13 5 0.68 0.00
 24 14 5 2.69 0.00
 25 15 5 -4.89 0.00
 24 16 5 2.87 0.00
 25 17 5 0.13 0.00
 24 18 5 -2.89 0.00
 23 19 5 3.40 0.00
 25 19 5 3.06 0.00
 24 20 5 -3.37 0.00
 23 21 5 1.81 0.00
 25 21 5 -1.90 0.00
 22 22 5 -2.48 0.00
 24 22 5 -2.66 0.00
 23 23 5 -10.69 0.00
 25 23 5 0.66 0.00
 22 24 5 -0.94 0.00
 24 24 5 6.13 0.00
 23 25 5 4.96 0.00
 22 26 5 6.15 0.00
 24 26 5 -4.65 0.00
 21 27 5 2.13 0.00
 23 27 5 -4.88 0.00
 22 28 5 -9.24 0.00
 21 29 5 -1.19 0.00
 23 29 5 -1.42 0.00
 20 30 5 -3.40 0.00
 22 30 5 7.80 0.00
 21 31 5 -3.55 0.00
 20 32 5 5.46 0.00
 22 32 5 -1.21 0.00
 19 33 5 4.33 0.00
 21 33 5 2.15 0.00
 18 34 5 -2.33 0.00
 20 34 5 -1.64 0.00
 19 35 5 -1.80 0.00
 21 35 5 -0.30 0.00
 18 36 5 -1.82 0.00
 20 36 5 0.44 0.00
 17 37 5 -1.92 0.00
 19 37 5 -0.72 0.00
 16 38 5 1.25 0.00
 18 38 5 -0.63 0.00
 15 39 5 1.82 0.00
 17 39 5 -4.53 0.00
 19 39 5 2.13 0.00
 16 40 5 0.00 0.00
 18 40 5 0.14 0.00
 15 41 5 -4.28 0.00
 17 41 5 4.27 0.00
 14 42 5 -4.42 0.00
 16 42 5 5.89 0.00
 13 43 5 3.99 0.00
 15 43 5 -0.25 0.00
 12 44 5 5.14 0.00
 14 44 5 11.09 0.00
 16 44 5 1.49 0.00
 11 45 5 -0.09 0.00
 13 45 5 -6.64 0.00
 15 45 5 1.61 0.00
 8 46 5 -1.73 0.00
 10 46 5 -0.62 0.00
 12 46 5 1.29 0.00
 14 46 5 -0.06 0.00
 7 47 5 -5.05 0.00
 9 47 5 5.21 0.00
 11 47 5 2.16 0.00
 13 47 5 5.07 0.00
 0 48 5 -7.04 0.00
 4 48 5 -3.87 0.00
 6 48 5 -1.13 0.00
 8 48 5 -4.90 0.00
 10 48 5 -5.95 0.00
 12 48 5 -7.30 0.00
 25 1 6 -0.47 0.00
 25 3 6 -2.15 0.00
 25 5 6 0.13 0.00
 25 7 6 1.01 0.00
 25 9 6 -1.76 0.00
 25 11 6 -3.27 0.00
 24 12 6 2.17 0.00
 25 13 6 -2.85 0.00
 24 14 6 -1.40 0.00
 25 15 6 -2.83 0.00
 24 16 6 -2.18 0.00
 23 17 6 -4.53 0.00
 25 17 6 0.39 0.00
 24 18 6 -4.30 0.00
 23 19 6 0.71 0.00
 25 19 6 -1.41 0.00
 22 20 6 -1.71 0.00
 24 20 6 1.15 0.00
 23 21 6 -0.76 0.00
 25 21 6 -2.12 0.00
 22 22 6 -0.27 0.00
 24 22 6 1.52 0.00
 23 23 6 -4.98 0.00
 22 24 6 1.32 0.00
 24 24 6 -5.75 0.00
 21 25 6 -7.04 0.00
 23 25 6 2.96 0.00
 22 26 6 -4.00 0.00
 24 26 6 3.63 0.00
 21 27 6 9.38 0.00
 23 27 6 -1.94 0.00
 20 28 6 1.27 0.00
 22 28 6 5.44 0.00
 21 29 6 -3.03 0.00
 23 29 6 -4.09 0.00
 20 30 6 5.36 0.00
 22 30 6 -3.37 0.00
 19 31 6 -1.95 0.00
 21 31 6 -6.13 0.00
 20 32 6 -6.69 0.00
 22 32 6 -0.35 0.00
 19 33 6 3.93 0.00
 21 33 6 0.29 0.00
 18 34 6 -1.80 0.00
 20 34 6 5.14 0.00
 17 35 6 10.68 0.00
 19 35 6 0.39 0.00
 18 36 6 0.69 0.00
 20 36 6 -3.49 0.00
 17 37 6 -4.00 0.00
 19 37 6 1.17 0.00
 16 38 6 0.29 0.00
 18 38 6 2.09 0.00
 15 39 6 1.15 0.00
 17 39 6 0.52 0.00
 14 40 6 -0.43 0.00
 16 40 6 0.61 0.00
 18 40 6 -7.21 0.00
 13 41 6 7.00 0.00
 15 41 6 -1.69 0.00
 17 41 6 -0.55 0.00
 12 42 6 2.91 0.00
 14 42 6 11.97 0.00
 16 42 6 5.82 0.00
 11 43 6 2.31 0.00
 13 43 6 0.83 0.00
 15 43 6 -1.09 0.00
 10 44 6 5.87 0.00
 12 44 6 7.93 0.00
 14 44 6 2.34 0.00
 9 45 6 12.14 0.00
 11 45 6 7.56 0.00
 13 45 6 -0.95 0.00
 8 46 6 2.80 0.00
 10 46 6 -4.55 0.00
 12 46 6 -2.07 0.00
 14 46 6 3.71 0.00
 5 47 6 6.08 0.00
 7 47 6 1.62 0.00
 9 47 6 5.01 0.00
 11 47 6 3.18 0.00
 13 47 6 1.40 0.00
 0 48 6 -2.37 0.00
 2 48 6 5.81 0.00
 4 48 6 0.70 0.00
 6 48 6 2.84 0.00
 8 48 6 5.90 0.00
 10 48 6 7.61 0.00
 12 48 6 1.15 0.00
 25 1 7 -6.24 0.00
 25 3 7 -3.06 0.00
 25 5 7 -3.67 0.00
 25 7 7 -1.12 0.00
 24 8 7 1.61 0.00
 25 9 7 -4.33 0.00
 24 10 7 -3.36 0.00
 25 11 7 -2.76 0.00
 24 12 7 2.20 0.00
 25 13 7 -2.45 0.00
 24 14 7 -7.19 0.00
 23 15 7 -6.92 0.00
 25 15 7 -1.11 0.00
 24 16 7 -2.38 0.00
 23 17 7 1.17 0.00
 25 17 7 -4.34 0.00
 24 18 7 -0.18 0.00
 23 19 7 -4.99 0.00
 25 19 7 -2.77 0.00
 22 20 7 -0.63 0.00
 24 20 7 2.78 0.00
 23 21 7 -0.29 0.00
 22 22 7 1.39 0.00
 24 22 7 -2.26 0.00
 21 23 7 -6.70 0.00
 23 23 7 3.43 0.00
 22 24 7 -1.29 0.00
 24 24 7 -3.74 0.00
 21 25 7 5.18 0.00
 23 25 7 -1.49 0.00
 20 26 7 8.03 0.00
 22 26 7 -5.04 0.00
 21 27 7 -6.51 0.00
 23 27 7 -4.32 0.00
 20 28 7 -7.40 0.00
 22 28 7 6.96 0.00
 19 29 7 -0.48 0.00
 21 29 7 -0.62 0.00
 20 30 7 10.54 0.00
 22 30 7 -1.93 0.00
 19 31 7 3.23 0.00
 21 31 7 2.24 0.00
 18 32 7 -0.92 0.00
 20 32 7 -6.20 0.00
 17 33 7 7.10 0.00
 19 33 7 -4.13 0.00
 21 33 7 -2.84 0.00
 18 34 7 -3.56 0.00
 20 34 7 -0.34 0.00
 17 35 7 -6.24 0.00
 19 35 7 3.62 0.00
 16 36 7 3.54 0.00
 18 36 7 2.71 0.00
 15 37 7 8.41 0.00
 17 37 7 4.88 0.00
 19 37 7 -1.29 0.00
 16 38 7 8.04 0.00
 18 38 7 -0.83 0.00
 15 39 7 1.74 0.00
 17 39 7 3.78 0.00
 14 40 7 2.75 0.00
 16 40 7 4.41 0.00
 13 41 7 -5.49 0.00
 15 41 7 -1.76 0.00
 17 41 7 -4.99 0.00
 12 42 7 -2.27 0.00
 14 42 7 -0.84 0.00
 16 42 7 -0.95 0.00
 11 43 7 5.58 0.00
 13 43 7 2.15 0.00
 15 43 7 0.73 0.00
 10 44 7 5.00 0.00
 12 44 7 5.49 0.00
 14 44 7 7.00 0.00
 9 45 7 -1.49 0.00
 11 45 7 -1.23 0.00
 13 45 7 -1.34 0.00
 0 46 7 -6.83 0.00
 6 46 7 1.66 0.00
 8 46 7 3.24 0.00
 10 46 7 6.35 0.00
 12 46 7 -0.25 0.00
 1 47 7 1.22 0.00
 3 47 7 -2.79 0.00
 5 47 7 -10.48 0.00
 7 47 7 -12.01 0.00
 9 47 7 -7.67 0.00
 11 47 7 -0.41 0.00
 0 48 7 8.63 0.00
 2 48 7 -2.74 0.00
 4 48 7 3.42 0.00
 6 48 7 -7.90 0.00
 8 48 7 3.95 0.00
 10 48 7 -0.80 0.00
 0 0 8 9.22 0.00
 24 0 8 5.67 0.00
 25 1 8 -5.76 0.00
 24 2 8 -5.58 0.00
 25 3 8 2.94 0.00
 24 4 8 -1.12 0.00
 25 5 8 -5.45 0.00
 24 6 8 4.70 0.00
 25 7 8 -4.75 0.00
 24 8 8 1.96 0.00
 25 9 8 0.31 0.00
 24 10 8 -2.89 0.00
 25 11 8 -1.63 0.00
 24 12 8 3.23 0.00
 23 13 8 8.86 0.00
 25 13 8 -4.80 0.00
 24 14 8 0.64 0.00
 23 15 8 -5.77 0.00
 25 15 8 0.31 0.00
 24 16 8 -0.60 0.00
 23 17 8 1.97 0.00
 25 17 8 -5.51 0.00
 22 18 8 -2.03 0.00
 24 18 8 0.28 0.00
 23 19 8 -1.54 0.00
 22 20 8 1.38 0.00
 24 20 8 -3.05 0.00
 21 21 8 -0.37 0.00
 23 21 8 1.59 0.00
 22 22 8 -3.12 0.00
 24 22 8 -0.09 0.00
 21 23 8 9.10 0.00
 23 23 8 1.09 0.00
 20 24 8 3.11 0.00
 22 24 8 -3.29 0.00
 21 25 8 1.69 0.00
 23 25 8 2.21 0.00
 20 26 8 -2.66 0.00
 22 26 8 4.66 0.00
 19 27 8 5.71 0.00
 21 27 8 -1.97 0.00
 20 28 8 6.84 0.00
 22 28 8 -0.51 0.00
 19 29 8 -0.20 0.00
 21 29 8 -0.73 0.00
 18 30 8 6.94 0.00
 20 30 8 -3.40 0.00
 17 31 8 -4.84 0.00
 19 31 8 -1.16 0.00
 21 31 8 5.05 0.00
 18 32 8 -3.57 0.00
 20 32 8 4.59 0.00
 17 33 8 1.56 0.00
 19 33 8 -2.70 0.00
 16 34 8 4.07 0.00
 18 34 8 3.61 0.00
 20 34 8 -5.47 0.00
 17 35 8 -5.47 0.00
 19 35 8 2.20 0.00
 16 36 8 -4.90 0.00
 18 36 8 -7.05 0.00
 15 37 8 -12.40 0.00
 17 37 8 -4.09 0.00
 14 38 8 2.72 0.00
 16 38 8 1.01 0.00
 18 38 8 -2.33 0.00
 13 39 8 10.49 0.00
 15 39 8 3.84 0.00
 17 39 8 4.23 0.00
 12 40 8 5.31 0.00
 14 40 8 -0.88 0.00
 16 40 8 -1.26 0.00
 11 41 8 1.82 0.00
 13 41 8 -9.77 0.00
 15 41 8 4.07 0.00
 10 42 8 -4.85 0.00
 12 42 8 -7.56 0.00
 14 42 8 -2.32 0.00
 9 43 8 -8.06 0.00
 11 43 8 -0.54 0.00
 13 43 8 -9.31 0.00
 15 43 8 -5.52 0.00
 8 44 8 8.25 0.00
 10 44 8 5.55 0.00
 12 44 8 0.42 0.00
 14 44 8 -1.05 0.00
 7 45 8 -3.35 0.00
 9 45 8 14.55 0.00
 11 45 8 0.81 0.00
 13 45 8 8.36 0.00
 0 46 8 -6.52 0.00
 4 46 8 -8.16 0.00
 6 46 8 1.99 0.00
 8 46 8 -7.96 0.00
 10 46 8 -7.09 0.00
 12 46 8 -6.52 0.00
 1 47 8 9.65 0.00
 3 47 8 5.14 0.00
 5 47 8 -3.63 0.00
 7 47 8 -2.32 0.00
 9 47 8 -4.59 0.00
 11 47 8 4.62 0.00
 0 48 8 3.97 0.00
 2 48 8 -8.04 0.00
 4 48 8 -2.19 0.00
 6 48 8 -8.60 0.00
 8 48 8 -4.95 0.00
 10 48 8 -2.84 0.00
 24 0 9 3.87 0.00
 25 1 9 4.42 0.00
 24 2 9 -3.67 0.00
 25 3 9 0.55 0.00
 24 4 9 0.11 0.00
 25 5 9 -4.37 0.00
 24 6 9 3.09 0.00
 25 7 9 2.92 0.00
 24 8 9 -2.27 0.00
 23 9 9 5.89 0.00
 25 9 9 -1.07 0.00
 24 10 9 6.16 0.00
 23 11 9 -6.27 0.00
 25 11 9 -3.77 0.00
 24 12 9 -4.96 0.00
 23 13 9 1.65 0.00
 25 13 9 -1.17 0.00
 24 14 9 2.99 0.00
 23 15 9 0.93 0.00
 25 15 9 -0.94 0.00
 22 16 9 2.64 0.00
 24 16 9 3.38 0.00
 23 17 9 -2.95 0.00
 22 18 9 -2.04 0.00
 24 18 9 -0.10 0.00
 21 19 9 -9.33 0.00
 23 19 9 -2.40 0.00
 22 20 9 1.07 0.00
 24 20 9 -0.83 0.00
 21 21 9 5.30 0.00
 23 21 9 -1.85 0.00
 22 22 9 -4.69 0.00
 21 23 9 -3.90 0.00
 23 23 9 -2.17 0.00
 20 24 9 -8.71 0.00
 22 24 9 -2.48 0.00
 19 25 9 4.69 0.00
 21 25 9 5.93 0.00
 20 26 9 0.33 0.00
 22 26 9 1.94 0.00
 19 27 9 -1.24 0.00
 21 27 9 -4.06 0.00
 18 28 9 -2.86 0.00
 20 28 9 -2.67 0.00
 22 28 9 -4.07 0.00
 17 29 9 -0.58 0.00
 19 29 9 3.96 0.00
 21 29 9 3.35 0.00
 18 30 9 4.83 0.00
 20 30 9 1.21 0.00
 17 31 9 6.83 0.00
 19 31 9 -0.27 0.00
 16 32 9 0.32 0.00
 18 32 9 1.25 0.00
 20 32 9 -2.15 0.00
 15 33 9 7.29 0.00
 17 33 9 -10.30 0.00
 19 33 9 0.70 0.00
 16 34 9 -6.23 0.00
 18 34 9 1.19 0.00
 15 35 9 -6.19 0.00
 17 35 9 3.53 0.00
 19 35 9 1.14 0.00
 14 36 9 -9.03 0.00
 16 36 9 10.13 0.00
 18 36 9 -3.91 0.00
 13 37 9 -8.06 0.00
 15 37 9 -2.26 0.00
 17 37 9 -4.26 0.00
 12 38 9 -9.09 0.00
 14 38 9 -6.22 0.00
 16 38 9 -13.65 0.00
 13 39 9 -3.74 0.00
 15 39 9 -2.62 0.00
 12 40 9 7.15 0.00
 14 40 9 3.01 0.00
 16 40 9 4.07 0.00
 11 41 9 7.60 0.00
 13 41 9 -5.62 0.00
 15 41 9 -3.33 0.00
 8 42 9 5.25 0.00
 10 42 9 1.41 0.00
 12 42 9 -0.17 0.00
 14 42 9 -1.97 0.00
 7 43 9 -6.35 0.00
 9 43 9 1.48 0.00
 11 43 9 -7.50 0.00
 13 43 9 -1.15 0.00
 0 44 9 8.84 0.00
 6 44 9 -0.48 0.00
 8 44 9 -10.59 0.00
 10 44 9 -2.08 0.00
 12 44 9 -5.56 0.00
 1 45 9 -8.35 0.00
 3 45 9 -5.06 0.00
 5 45 9 -3.30 0.00
 7 45 9 9.33 0.00
 9 45 9 11.07 0.00
 11 45 9 6.00 0.00
 0 46 9 -0.70 0.00
 2 46 9 -2.97 0.00
 4 46 9 0.15 0.00
 6 46 9 -4.99 0.00
 8 46 9 5.10 0.00
 10 46 9 -0.79 0.00
 1 47 9 -0.41 0.00
 3 47 9 -5.39 0.00
 5 47 9 -0.60 0.00
 7 47 9 -2.81 0.00
 9 47 9 1.98 0.00
 0 48 9 3.78 0.00
 2 48 9 5.18 0.00
 4 48 9 -2.38 0.00
 6 48 9 1.56 0.00
 8 48 9 -10.59 0.00
 24 0 10 -3.27 0.00
 23 1 10 -8.78 0.00
 25 1 10 3.68 0.00
 24 2 10 3.56 0.00
 23 3 10 8.92 0.00
 25 3 10 0.22 0.00
 24 4 10 1.69 0.00
 23 5 10 -1.86 0.00
 25 5 10 2.38 0.00
 24 6 10 -6.37 0.00
 23 7 10 -0.91 0.00
 25 7 10 2.48 0.00
 24 8 10 3.33 0.00
 23 9 10 7.27 0.00
 25 9 10 -2.85 0.00
 24 10 10 3.15 0.00
 23 11 10 1.43 0.00
 25 11 10 3.79 0.00
 22 12 10 2.99 0.00
 24 12 10 -3.47 0.00
 23 13 10 -0.10 0.00
 22 14 10 -10.54 0.00
 24 14 10 -2.00 0.00
 23 15 10 -3.79 0.00
 22 16 10 0.39 0.00
 24 16 10 -2.09 0.00
 21 17 10 3.64 0.00
 23 17 10 -1.61 0.00
 22 18 10 3.99 0.00
 24 18 10 1.52 0.00
 21 19 10 -4.93 0.00
 23 19 10 -1.45 0.00
 22 20 10 -5.54 0.00
 21 21 10 0.80 0.00
 23 21 10 0.41 0.00
 20 22 10 3.81 0.00
 22 22 10 8.59 0.00
 21 23 10 3.20 0.00
 20 24 10 -2.61 0.00
 22 24 10 1.09 0.00
 19 25 10 3.76 0.00
 21 25 10 -5.19 0.00
 18 26 10 -0.42 0.00
 20 26 10 3.88 0.00
 22 26 10 1.12 0.00
 19 27 10 -2.08 0.00
 21 27 10 10.61 0.00
 18 28 10 2.69 0.00
 20 28 10 1.70 0.00
 17 29 10 -1.47 0.00
 19 29 10 2.27 0.00
 21 29 10 -5.29 0.00
 16 30 10 1.74 0.00
 18 30 10 2.42 0.00
 20 30 10 1.46 0.00
 15 31 10 7.16 0.00
 17 31 10 3.58 0.00
 19 31 10 4.64 0.00
 16 32 10 -5.03 0.00
 18 32 10 1.13 0.00
 15 33 10 7.68 0.00
 17 33 10 6.71 0.00
 19 33 10 2.94 0.00
 14 34 10 -4.70 0.00
 16 34 10 2.48 0.00
 18 34 10 -2.70 0.00
 13 35 10 13.49 0.00
 15 35 10 5.05 0.00
 17 35 10 3.39 0.00
 12 36 10 -11.30 0.00
 14 36 10 1.95 0.00
 16 36 10 -9.51 0.00
 13 37 10 -3.51 0.00
 15 37 10 8.85 0.00
 17 37 10 4.10 0.00
 12 38 10 4.50 0.00
 14 38 10 -8.29 0.00
 16 38 10 5.07 0.00
 11 39 10 6.96 0.00
 13 39 10 -1.11 0.00
 15 39 10 0.05 0.00
 10 40 10 3.71 0.00
 12 40 10 -0.23 0.00
 14 40 10 7.74 0.00
 9 41 10 -2.23 0.00
 11 41 10 -3.17 0.00
 13 41 10 8.61 0.00
 0 42 10 0.76 0.00
 6 42 10 4.71 0.00
 8 42 10 5.93 0.00
 10 42 10 2.62 0.00
 12 42 10 2.43 0.00
 1 43 10 0.73 0.00
 5 43 10 -17.11 0.00
 7 43 10 -6.78 0.00
 9 43 10 -10.61 0.00
 11 43 10 -5.00 0.00
 13 43 10 -3.41 0.00
 0 44 10 18.51 0.00
 2 44 10 8.97 0.00
 4 44 10 13.01 0.00
 6 44 10 1.61 0.00
 8 44 10 2.35 0.00
 10 44 10 4.77 0.00
 12 44 10 4.83 0.00
 1 45 10 0.62 0.00
 3 45 10 -4.17 0.00
 5 45 10 12.46 0.00
 7 45 10 -7.02 0.00
 9 45 10 -0.53 0.00
 11 45 10 -2.78 0.00
 0 46 10 3.28 0.00
 2 46 10 -0.33 0.00
 4 46 10 3.02 0.00
 6 46 10 7.71 0.00
 8 46 10 8.07 0.00
 10 46 10 7.76 0.00
 1 47 10 2.13 0.00
 3 47 10 1.39 0.00
 5 47 10 -5.67 0.00
 7 47 10 0.28 0.00
 0 48 10 4.99 0.00
 2 48 10 7.68 0.00
 4 48 10 1.25 0.00
 6 48 10 0.06 0.00
 22 0 11 3.21 0.00
 24 0 11 6.57 0.00
 23 1 11 -8.61 0.00
 25 1 11 -0.72 0.00
 22 2 11 0.34 0.00
 24 2 11 -2.62 0.00
 23 3 11 1.36 0.00
 25 3 11 -3.64 0.00
 22 4 11 0.64 0.00
 24 4 11 3.52 0.00
 23 5 11 -2.40 0.00
 25 5 11 0.83 0.00
 22 6 11 2.92 0.00
 24 6 11 -0.70 0.00
 23 7 11 -7.09 0.00
 22 8 11 -2.65 0.00
 24 8 11 -3.56 0.00
 23 9 11 -2.17 0.00
 22 10 11 0.77 0.00
 24 10 11 2.81 0.00
 23 11 11 -5.60 0.00
 22 12 11 -2.43 0.00
 24 12 11 -3.81 0.00
 21 13 11 -1.38 0.00
 23 13 11 -0.49 0.00
 22 14 11 -0.70 0.00
 24 14 11 2.81 0.00
 21 15 11 -3.43 0.00
 23 15 11 -3.78 0.00
 22 16 11 -3.04 0.00
 21 17 11 -5.87 0.00
 23 17 11 -3.54 0.00
 20 18 11 -2.68 0.00
 22 18 11 4.16 0.00
 21 19 11 0.67 0.00
 23 19 11 -0.31 0.00
 20 20 11 3.87 0.00
 22 20 11 -3.32 0.00
 21 21 11 -2.77 0.00
 20 22 11 -7.97 0.00
 22 22 11 2.87 0.00
 19 23 11 -5.01 0.00
 21 23 11 -0.82 0.00
 18 24 11 -3.59 0.00
 20 24 11 7.77 0.00
 19 25 11 9.23 0.00
 21 25 11 2.01 0.00
 18 26 11 4.13 0.00
 20 26 11 -1.63 0.00
 17 27 11 -2.18 0.00
 19 27 11 -0.86 0.00
 16 28 11 -1.23 0.00
 18 28 11 3.63 0.00
 20 28 11 -1.20 0.00
 17 29 11 -8.07 0.00
 19 29 11 -0.06 0.00
 16 30 11 -1.05 0.00
 18 30 11 -0.28 0.00
 15 31 11 -6.14 0.00
 17 31 11 6.47 0.00
 19 31 11 3.60 0.00
 14 32 11 -3.10 0.00
 16 32 11 -3.34 0.00
 18 32 11 -0.46 0.00
 13 33 11 -9.33 0.00
 15 33 11 -6.89 0.00
 17 33 11 -9.85 0.00
 12 34 11 2.23 0.00
 14 34 11 -7.07 0.00
 16 34 11 0.36 0.00
 18 34 11 -0.87 0.00
 11 35 11 7.92 0.00
 13 35 11 -1.55 0.00
 15 35 11 1.34 0.00
 17 35 11 1.19 0.00
 10 36 11 -12.11 0.00
 12 36 11 -4.42 0.00
 14 36 11 2.58 0.00
 16 36 11 -5.29 0.00
 11 37 11 -1.05 0.00
 13 37 11 7.72 0.00
 15 37 11 0.43 0.00
 10 38 11 0.16 0.00
 12 38 11 -6.07 0.00
 14 38 11 -6.70 0.00
 7 39 11 1.64 0.00
 9 39 11 6.76 0.00
 11 39 11 3.73 0.00
 13 39 11 -4.90 0.00
 15 39 11 2.69 0.00
 0 40 11 -9.97 0.00
 6 40 11 8.66 0.00
 8 40 11 11.39 0.00
 10 40 11 -1.00 0.00
 12 40 11 1.43 0.00
 14 40 11 0.66 0.00
 1 41 11 2.17 0.00
 5 41 11 1.89 0.00
 7 41 11 2.73 0.00
 9 41 11 9.01 0.00
 11 41 11 6.75 0.00
 13 41 11 8.48 0.00
 0 42 11 1.04 0.00
 2 42 11 -6.40 0.00
 4 42 11 0.17 0.00
 6 42 11 5.94 0.00
 8 42 11 2.72 0.00
 10 42 11 5.89 0.00
 12 42 11 -1.85 0.00
 1 43 11 6.41 0.00
 3 43 11 -0.13 0.00
 5 43 11 2.22 0.00
 7 43 11 1.45 0.00
 9 43 11 2.42 0.00
 11 43 11 -1.69 0.00
 0 44 11 3.42 0.00
 2 44 11 -1.90 0.00
 4 44 11 -11.28 0.00
 6 44 11 -7.51 0.00
 8 44 11 -4.20 0.00
 10 44 11 -8.12 0.00
 1 45 11 8.85 0.00
 3 45 11 9.26 0.00
 5 45 11 3.06 0.00
 7 45 11 -6.18 0.00
 9 45 11 -0.18 0.00
 0 46 11 -0.63 0.00
 2 46 11 -5.66 0.00
 4 46 11 6.11 0.00
 6 46 11 7.16 0.00
 8 46 11 6.92 0.00
 1 47 11 -5.21 0.00
 3 47 11 -4.66 0.00
 5 47 11 -0.69 0.00
 0 48 11 4.87 0.00
 2 48 11 6.56 0.00
 4 48 11 -1.65 0.00
 22 0 12 8.17 0.00
 24 0 12 5.77 0.00
 21 1 12 -7.61 0.00
 23 1 12 4.99 0.00
 22 2 12 2.21 0.00
 24 2 12 -3.04 0.00
 21 3 12 6.02 0.00
 23 3 12 -1.25 0.00
 22 4 12 -7.04 0.00
 24 4 12 2.33 0.00
 21 5 12 -4.49 0.00
 23 5 12 -0.09 0.00
 22 6 12 0.64 0.00
 24 6 12 1.82 0.00
 21 7 12 -5.33 0.00
 23 7 12 -0.45 0.00
 22 8 12 3.91 0.00
 24 8 12 -1.69 0.00
 21 9 12 -4.76 0.00
 23 9 12 -5.99 0.00
 22 10 12 -2.26 0.00
 21 11 12 -3.63 0.00
 23 11 12 -1.26 0.00
 22 12 12 1.79 0.00
 21 13 12 1.62 0.00
 23 13 12 -1.26 0.00
 20 14 12 -1.67 0.00
 22 14 12 4.16 0.00
 21 15 12 -7.09 0.00
 23 15 12 1.40 0.00
 20 16 12 4.84 0.00
 22 16 12 3.64 0.00
 21 17 12 1.11 0.00
 20 18 12 5.63 0.00
 22 18 12 0.80 0.00
 19 19 12 0.18 0.00
 21 19 12 -3.15 0.00
 20 20 12 -8.03 0.00
 22 20 12 1.52 0.00
 19 21 12 1.60 0.00
 21 21 12 -0.07 0.00
 18 22 12 15.29 0.00
 20 22 12 9.81 0.00
 19 23 12 -2.63 0.00
 21 23 12 -3.63 0.00
 18 24 12 -9.10 0.00
 20 24 12 1.19 0.00
 17 25 12 -1.59 0.00
 19 25 12 2.69 0.00
 18 26 12 2.36 0.00
 20 26 12 2.50 0.00
 17 27 12 0.22 0.00
 19 27 12 2.79 0.00
 16 28 12 -0.15 0.00
 18 28 12 9.21 0.00
 15 29 12 -0.98 0.00
 17 29 12 -2.05 0.00
 19 29 12 2.58 0.00
 14 30 12 3.41 0.00
 16 30 12 -4.01 0.00
 18 30 12 -5.68 0.00
 15 31 12 2.34 0.00
 17 31 12 -0.55 0.00
 14 32 12 1.79 0.00
 16 32 12 4.09 0.00
 18 32 12 5.70 0.00
 13 33 12 0.66 0.00
 15 33 12 -5.16 0.00
 17 33 12 -2.52 0.00
 12 34 12 -5.12 0.00
 14 34 12 -2.63 0.00
 16 34 12 -2.64 0.00
 11 35 12 11.62 0.00
 13 35 12 -1.27 0.00
 15 35 12 7.51 0.00
 0 36 12 25.11 0.00
 10 36 12 -1.38 0.00
 12 36 12 -0.29 0.00
 14 36 12 -7.38 0.00
 7 37 12 -0.54 0.00
 9 37 12 -2.40 0.00
 11 37 12 -7.82 0.00
 13 37 12 6.96 0.00
 15 37 12 0.82 0.00
 6 38 12 -4.46 0.00
 8 38 12 -0.91 0.00
 10 38 12 0.55 0.00
 12 38 12 4.60 0.00
 14 38 12 3.70 0.00
 3 39 12 2.66 0.00
 5 39 12 -5.76 0.00
 7 39 12 1.46 0.00
 9 39 12 1.77 0.00
 11 39 12 -3.47 0.00
 13 39 12 -1.97 0.00
 0 40 12 6.05 0.00
 2 40 12 -1.07 0.00
 4 40 12 -5.82 0.00
 6 40 12 -1.20 0.00
 8 40 12 -3.45 0.00
 10 40 12 -3.27 0.00
 12 40 12 -5.76 0.00
 1 41 12 -3.52 0.00
 3 41 12 -1.08 0.00
 5 41 12 8.21 0.00
 7 41 12 4.51 0.00
 9 41 12 7.71 0.00
 11 41 12 5.53 0.00
 0 42 12 3.71 0.00
 2 42 12 -2.28 0.00
 4 42 12 -2.36 0.00
 6 42 12 -7.82 0.00
 8 42 12 -2.43 0.00
 10 42 12 -3.45 0.00
 1 43 12 -6.80 0.00
 3 43 12 -4.91 0.00
 5 43 12 3.70 0.00
 7 43 12 -0.43 0.00
 9 43 12 9.82 0.00
 0 44 12 8.80 0.00
 2 44 12 4.81 0.00
 4 44 12 -3.95 0.00
 6 44 12 7.99 0.00
 8 44 12 -1.35 0.00
 1 45 12 -2.29 0.00
 3 45 12 -2.89 0.00
 5 45 12 -9.68 0.00
 7 45 12 -3.87 0.00
 0 46 12 2.67 0.00
 2 46 12 3.01 0.00
 4 46 12 1.87 0.00
 6 46 12 -1.16 0.00
 1 47 12 -1.97 0.00
 3 47 12 -0.85 0.00
 20 0 13 4.31 0.00
 22 0 13 4.24 0.00
 21 1 13 -2.55 0.00
 23 1 13 4.08 0.00
 20 2 13 -1.00 0.00
 22 2 13 -2.53 0.00
 21 3 13 2.19 0.00
 23 3 13 -2.67 0.00
 20 4 13 0.52 0.00
 22 4 13 2.77 0.00
 21 5 13 -5.88 0.00
 23 5 13 -3.15 0.00
 20 6 13 -2.77 0.00
 22 6 13 -1.68 0.00
 21 7 13 -3.57 0.00
 23 7 13 4.63 0.00
 20 8 13 1.83 0.00
 22 8 13 -0.63 0.00
 21 9 13 9.57 0.00
 23 9 13 -3.77 0.00
 20 10 13 -1.96 0.00
 22 10 13 2.22 0.00
 21 11 13 -2.68 0.00
 23 11 13 5.36 0.00
 20 12 13 0.63 0.00
 22 12 13 -2.77 0.00
 21 13 13 7.34 0.00
 20 14 13 0.95 0.00
 22 14 13 8.29 0.00
 19 15 13 1.85 0.00
 21 15 13 0.06 0.00
 20 16 13 -0.98 0.00
 22 16 13 -2.46 0.00
 19 17 13 6.46 0.00
 21 17 13 -0.42 0.00
 20 18 13 -0.31 0.00
 19 19 13 3.50 0.00
 21 19 13 1.78 0.00
 18 20 13 0.38 0.00
 20 20 13 -0.29 0.00
 19 21 13 -3.22 0.00
 21 21 13 -6.58 0.00
 18 22 13 -1.52 0.00
 20 22 13 1.30 0.00
 17 23 13 3.71 0.00
 19 23 13 4.21 0.00
 18 24 13 1.61 0.00
 20 24 13 -1.14 0.00
 17 25 13 -2.17 0.00
 19 25 13 -0.70 0.00
 16 26 13 -0.64 0.00
 18 26 13 2.14 0.00
 15 27 13 -7.07 0.00
 17 27 13 -9.55 0.00
 19 27 13 0.28 0.00
 14 28 13 -3.83 0.00
 16 28 13 -5.83 0.00
 18 28 13 -3.12 0.00
 15 29 13 -1.24 0.00
 17 29 13 3.78 0.00
 14 30 13 -6.89 0.00
 16 30 13 -1.52 0.00
 13 31 13 -1.57 0.00
 15 31 13 2.68 0.00
 17 31 13 -4.67 0.00
 12 32 13 1.29 0.00
 14 32 13 2.58 0.00
 16 32 13 1.14 0.00
 11 33 13 -5.22 0.00
 13 33 13 3.16 0.00
 15 33 13 3.97 0.00
 10 34 13 -2.99 0.00
 12 34 13 -6.56 0.00
 14 34 13 -1.53 0.00
 9 35 13 3.88 0.00
 11 35 13 -0.78 0.00
 13 35 13 1.93 0.00
 15 35 13 1.42 0.00
 8 36 13 11.92 0.00
 10 36 13 5.53 0.00
 12 36 13 6.27 0.00
 14 36 13 -0.24 0.00
 5 37 13 2.93 0.00
 7 37 13 0.31 0.00
 9 37 13 -0.17 0.00
 11 37 13 -2.52 0.00
 13 37 13 -2.36 0.00
 0 38 13 12.60 0.00
 2 38 13 3.32 0.00
 4 38 13 -0.91 0.00
 6 38 13 -1.73 0.00
 8 38 13 0.44 0.00
 10 38 13 -1.25 0.00
 12 38 13 -3.61 0.00
 1 39 13 8.49 0.00
 3 39 13 11.98 0.00
 5 39 13 0.53 0.00
 7 39 13 1.32 0.00
 9 39 13 0.10 0.00
 11 39 13 1.99 0.00
 0 40 13 6.56 0.00
 2 40 13 -3.65 0.00
 4 40 13 -6.93 0.00
 6 40 13 -6.14 0.00
 8 40 13 -2.85 0.00
 10 40 13 -7.16 0.00
 1 41 13 2.78 0.00
 3 41 13 3.11 0.00
 5 41 13 9.18 0.00
 7 41 13 -3.62 0.00
 9 41 13 1.94 0.00
 0 42 13 7.01 0.00
 2 42 13 0.89 0.00
 4 42 13 -1.03 0.00
 6 42 13 -0.06 0.00
 8 42 13 -1.01 0.00
 1 43 13 1.53 0.00
 3 43 13 1.13 0.00
 5 43 13 2.71 0.00
 7 43 13 -1.75 0.00
 0 44 13 1.30 0.00
 2 44 13 0.64 0.00
 4 44 13 -7.93 0.00
 6 44 13 -2.59 0.00
 1 45 13 5.10 0.00
 3 45 13 5.80 0.00
 20 0 14 4.44 0.00
 22 0 14 -2.58 0.00
 19 1 14 -1.39 0.00
 21 1 14 1.72 0.00
 20 2 14 1.59 0.00
 22 2 14 1.21 0.00
 19 3 14 7.52 0.00
 21 3 14 0.54 0.00
 20 4 14 -0.99 0.00
 22 4 14 5.16 0.00
 19 5 14 -1.12 0.00
 21 5 14 1.06 0.00
 20 6 14 0.73 0.00
 22 6 14 -1.82 0.00
 19 7 14 0.52 0.00
 21 7 14 -2.32 0.00
 20 8 14 9.03 0.00
 22 8 14 1.99 0.00
 19 9 14 -4.59 0.00
 21 9 14 2.06 0.00
 20 10 14 5.44 0.00
 22 10 14 3.36 0.00
 19 11 14 1.56 0.00
 21 11 14 -3.36 0.00
 20 12 14 -1.62 0.00
 22 12 14 4.10 0.00
 19 13 14 -0.72 0.00
 21 13 14 -2.46 0.00
 18 14 14 0.96 0.00
 20 14 14 5.96 0.00
 19 15 14 5.27 0.00
 21 15 14 3.16 0.00
 18 16 14 0.13 0.00
 20 16 14 -7.34 0.00
 19 17 14 1.53 0.00
 21 17 14 0.37 0.00
 18 18 14 2.37 0.00
 20 18 14 3.00 0.00
 17 19 14 -0.23 0.00
 19 19 14 3.57 0.00
 18 20 14 -2.23 0.00
 20 20 14 -1.19 0.00
 17 21 14 3.54 0.00
 19 21 14 3.29 0.00
 16 22 14 6.77 0.00
 18 22 14 -5.97 0.00
 17 23 14 -5.89 0.00
 19 23 14 0.00 0.00
 16 24 14 -8.11 0.00
 18 24 14 5.88 0.00
 15 25 14 -6.34 0.00
 17 25 14 -3.20 0.00
 14 26 14 -3.57 0.00
 16 26 14 4.14 0.00
 18 26 14 0.97 0.00
 15 27 14 4.64 0.00
 17 27 14 2.64 0.00
 14 28 14 -1.94 0.00
 16 28 14 -3.74 0.00
 13 29 14 -0.43 0.00
 15 29 14 -2.83 0.00
 17 29 14 -3.39 0.00
 12 30 14 -6.16 0.00
 14 30 14 -0.28 0.00
 16 30 14 0.50 0.00
 11 31 14 -5.97 0.00
 13 31 14 1.93 0.00
 15 31 14 1.18 0.00
 10 32 14 2.57 0.00
 12 32 14 8.83 0.00
 14 32 14 -3.94 0.00
 9 33 14 -7.77 0.00
 11 33 14 -1.25 0.00
 13 33 14 -3.12 0.00
 15 33 14 -0.13 0.00
 8 34 14 2.18 0.00
 10 34 14 -3.03 0.00
 12 34 14 -3.68 0.00
 14 34 14 6.35 0.00
 7 35 14 -4.66 0.00
 9 35 14 -2.28 0.00
 11 35 14 -6.12 0.00
 13 35 14 1.20 0.00
 4 36 14 -9.56 0.00
 6 36 14 -1.79 0.00
 8 36 14 -2.26 0.00
 10 36 14 -0.22 0.00
 12 36 14 1.27 0.00
 1 37 14 7.04 0.00
 3 37 14 15.77 0.00
 5 37 14 10.67 0.00
 7 37 14 0.80 0.00
 9 37 14 0.03 0.00
 11 37 14 0.80 0.00
 0 38 14 -11.96 0.00
 2 38 14 -6.49 0.00
 4 38 14 -8.30 0.00
 6 38 14 0.29 0.00
 8 38 14 3.96 0.00
 10 38 14 -3.44 0.00
 1 39 14 2.84 0.00
 3 39 14 6.40 0.00
 5 39 14 2.83 0.00
 7 39 14 -7.25 0.00
 9 39 14 -4.32 0.00
 0 40 14 8.19 0.00
 2 40 14 -5.14 0.00
 4 40 14 -5.44 0.00
 6 40 14 3.65 0.00
 8 40 14 1.51 0.00
 1 41 14 3.42 0.00
 3 41 14 4.77 0.00
 5 41 14 6.96 0.00
 7 41 14 -1.10 0.00
 0 42 14 -0.44 0.00
 2 42 14 -3.68 0.00
 4 42 14 -5.29 0.00
 6 42 14 -2.22 0.00
 1 43 14 -2.31 0.00
 3 43 14 6.07 0.00
 5 43 14 2.43 0.00
 0 44 14 3.16 0.00
 2 44 14 1.32 0.00
 18 0 15 -4.30 0.00
 20 0 15 1.69 0.00
 19 1 15 -2.37 0.00
 21 1 15 2.88 0.00
 18 2 15 -6.27 0.00
 20 2 15 -5.17 0.00
 19 3 15 5.85 0.00
 21 3 15 -1.17 0.00
 18 4 15 1.79 0.00
 20 4 15 6.60 0.00
 19 5 15 0.16 0.00
 21 5 15 4.27 0.00
 18 6 15 -4.37 0.00
 20 6 15 -1.81 0.00
 19 7 15 -6.84 0.00
 21 7 15 -5.72 0.00
 18 8 15 -1.27 0.00
 20 8 15 0.79 0.00
 19 9 15 5.44 0.00
 21 9 15 0.11 0.00
 18 10 15 -3.82 0.00
 20 10 15 -3.37 0.00
 19 11 15 -0.37 0.00
 21 11 15 -2.81 0.00
 18 12 15 2.28 0.00
 20 12 15 1.43 0.00
 17 13 15 3.68 0.00
 19 13 15 -0.19 0.00
 18 14 15 -2.35 0.00
 20 14 15 0.29 0.00
 17 15 15 7.37 0.00
 19 15 15 1.62 0.00
 18 16 15 2.43 0.00
 20 16 15 -1.09 0.00
 17 17 15 -10.24 0.00
 19 17 15 -1.74 0.00
 16 18 15 6.02 0.00
 18 18 15 -0.86 0.00
 17 19 15 5.32 0.00
 19 19 15 -2.58 0.00
 16 20 15 -8.26 0.00
 18 20 15 -3.17 0.00
 15 21 15 -8.78 0.00
 17 21 15 -8.15 0.00
 19 21 15 2.35 0.00
 16 22 15 -0.74 0.00
 18 22 15 0.79 0.00
 15 23 15 1.28 0.00
 17 23 15 -0.34 0.00
 14 24 15 -7.09 0.00
 16 24 15 -4.54 0.00
 18 24 15 -3.86 0.00
 13 25 15 8.12 0.00
 15 25 15 -3.53 0.00
 17 25 15 1.16 0.00
 14 26 15 -0.10 0.00
 16 26 15 -2.27 0.00
 13 27 15 -1.82 0.00
 15 27 15 7.75 0.00
 12 28 15 -0.72 0.00
 14 28 15 0.07 0.00
 16 28 15 5.42 0.00
 11 29 15 3.50 0.00
 13 29 15 8.53 0.00
 15 29 15 0.17 0.00
 10 30 15 -4.57 0.00
 12 30 15 -2.03 0.00
 14 30 15 -2.25 0.00
 9 31 15 -2.26 0.00
 11 31 15 -5.93 0.00
 13 31 15 2.32 0.00
 8 32 15 5.02 0.00
 10 32 15 5.11 0.00
 12 32 15 3.28 0.00
 14 32 15 3.98 0.00
 7 33 15 -3.88 0.00
 9 33 15 -0.21 0.00
 11 33 15 6.90 0.00
 13 33 15 2.96 0.00
 4 34 15 5.88 0.00
 6 34 15 -4.20 0.00
 8 34 15 -1.79 0.00
 10 34 15 -8.02 0.00
 12 34 15 0.62 0.00
 1 35 15 -6.74 0.00
 3 35 15 6.20 0.00
 5 35 15 -0.54 0.00
 7 35 15 -0.04 0.00
 9 35 15 -6.79 0.00
 11 35 15 -6.14 0.00
 0 36 15 -3.33 0.00
 2 36 15 -3.30 0.00
 4 36 15 -6.77 0.00
 6 36 15 4.38 0.00
 8 36 15 1.16 0.00
 10 36 15 1.18 0.00
 1 37 15 -6.25 0.00
 3 37 15 -6.03 0.00
 5 37 15 1.79 0.00
 7 37 15 -8.16 0.00
 9 37 15 -4.78 0.00
 0 38 15 9.51 0.00
 2 38 15 5.05 0.00
 4 38 15 4.38 0.00
 6 38 15 8.90 0.00
 8 38 15 4.12 0.00
 1 39 15 -4.47 0.00
 3 39 15 0.13 0.00
 5 39 15 1.41 0.00
 7 39 15 -4.27 0.00
 0 40 15 -0.33 0.00
 2 40 15 -4.82 0.00
 4 40 15 -10.32 0.00
 6 40 15 -2.44 0.00
 1 41 15 -5.24 0.00
 3 41 15 2.30 0.00
 5 41 15 1.57 0.00
 0 42 15 1.47 0.00
 2 42 15 0.11 0.00
 18 0 16 -2.30 0.00
 20 0 16 0.00 0.00
 17 1 16 -11.57 0.00
 19 1 16 4.25 0.00
 18 2 16 -2.12 0.00
 20 2 16 0.07 0.00
 17 3 16 13.65 0.00
 19 3 16 -3.59 0.00
 18 4 16 -2.92 0.00
 20 4 16 -1.33 0.00
 17 5 16 0.16 0.00
 19 5 16 5.15 0.00
 18 6 16 0.62 0.00
 20 6 16 6.25 0.00
 17 7 16 5.18 0.00
 19 7 16 -1.64 0.00
 18 8 16 -4.39 0.00
 20 8 16 -9.70 0.00
 17 9 16 -4.55 0.00
 19 9 16 2.59 0.00
 18 10 16 1.63 0.00
 20 10 16 3.88 0.00
 17 11 16 -2.03 0.00
 19 11 16 -5.04 0.00
 16 12 16 10.57 0.00
 18 12 16 1.35 0.00
 17 13 16 5.64 0.00
 19 13 16 0.72 0.00
 16 14 16 -3.42 0.00
 18 14 16 -1.09 0.00
 15 15 16 -3.58 0.00
 17 15 16 -0.91 0.00
 19 15 16 1.42 0.00
 16 16 16 4.42 0.00
 18 16 16 3.98 0.00
 15 17 16 -5.64 0.00
 17 17 16 -5.34 0.00
 14 18 16 1.12 0.00
 16 18 16 -3.92 0.00
 18 18 16 -1.79 0.00
 15 19 16 -2.30 0.00
 17 19 16 0.75 0.00
 14 20 16 -6.38 0.00
 16 20 16 -0.50 0.00
 18 20 16 -3.29 0.00
 13 21 16 -6.41 0.00
 15 21 16 -4.68 0.00
 17 21 16 -2.68 0.00
 14 22 16 0.83 0.00
 16 22 16 -6.18 0.00
 13 23 16 12.16 0.00
 15 23 16 2.45 0.00
 17 23 16 0.52 0.00
 12 24 16 11.35 0.00
 14 24 16 -0.41 0.00
 16 24 16 5.66 0.00
 11 25 16 -3.24 0.00
 13 25 16 -1.83 0.00
 15 25 16 -4.35 0.00
 12 26 16 -10.82 0.00
 14 26 16 2.48 0.00
 11 27 16 5.14 0.00
 13 27 16 10.20 0.00
 15 27 16 4.51 0.00
 10 28 16 -4.85 0.00
 12 28 16 3.34 0.00
 14 28 16 -4.28 0.00
 9 29 16 -9.27 0.00
 11 29 16 -0.21 0.00
 13 29 16 2.45 0.00
 8 30 16 0.10 0.00
 10 30 16 -3.94 0.00
 12 30 16 -3.05 0.00
 5 31 16 5.65 0.00
 7 31 16 1.25 0.00
 9 31 16 1.92 0.00
 11 31 16 -1.56 0.00
 13 31 16 3.92 0.00
 4 32 16 -7.55 0.00
 6 32 16 0.64 0.00
 8 32 16 -3.87 0.00
 10 32 16 -4.33 0.00
 12 32 16 -5.02 0.00
 1 33 16 -10.22 0.00
 3 33 16 0.75 0.00
 5 33 16 1.66 0.00
 7 33 16 9.78 0.00
 9 33 16 0.62 0.00
 11 33 16 3.14 0.00
 0 34 16 -3.05 0.00
 2 34 16 2.81 0.00
 4 34 16 -0.27 0.00
 6 34 16 11.61 0.00
 8 34 16 9.13 0.00
 10 34 16 1.56 0.00
 1 35 16 1.58 0.00
 3 35 16 3.98 0.00
 5 35 16 1.93 0.00
 7 35 16 -8.95 0.00
 9 35 16 -2.64 0.00
 0 36 16 4.45 0.00
 2 36 16 -2.04 0.00
 4 36 16 0.28 0.00
 6 36 16 0.51 0.00
 8 36 16 3.86 0.00
 1 37 16 -1.19 0.00
 3 37 16 0.82 0.00
 5 37 16 2.63 0.00
 7 37 16 1.63 0.00
 0 38 16 -1.05 0.00
 2 38 16 -6.43 0.00
 4 38 16 -4.18 0.00
 6 38 16 5.59 0.00
 1 39 16 4.09 0.00
 3 39 16 8.20 0.00
 5 39 16 5.33 0.00
 0 40 16 4.82 0.00
 2 40 16 2.58 0.00
 16 0 17 4.44 0.00
 18 0 17 1.55 0.00
 17 1 17 -0.09 0.00
 19 1 17 4.83 0.00
 16 2 17 -5.14 0.00
 18 2 17 -9.75 0.00
 17 3 17 6.24 0.00
 19 3 17 -0.97 0.00
 16 4 17 -1.44 0.00
 18 4 17 2.49 0.00
 17 5 17 -1.42 0.00
 19 5 17 -1.91 0.00
 16 6 17 2.16 0.00
 18 6 17 -8.19 0.00
 15 7 17 -1.42 0.00
 17 7 17 0.80 0.00
 19 7 17 1.00 0.00
 16 8 17 -2.51 0.00
 18 8 17 2.42 0.00
 15 9 17 -1.44 0.00
 17 9 17 1.29 0.00
 19 9 17 -4.05 0.00
 16 10 17 -2.75 0.00
 18 10 17 -2.86 0.00
 15 11 17 -2.84 0.00
 17 11 17 -2.84 0.00
 16 12 17 0.51 0.00
 18 12 17 -1.91 0.00
 15 13 17 5.46 0.00
 17 13 17 4.85 0.00
 14 14 17 5.92 0.00
 16 14 17 3.74 0.00
 18 14 17 1.87 0.00
 15 15 17 -1.73 0.00
 17 15 17 -2.48 0.00
 14 16 17 1.94 0.00
 16 16 17 1.87 0.00
 13 17 17 0.43 0.00
 15 17 17 -7.10 0.00
 17 17 17 1.44 0.00
 12 18 17 11.89 0.00
 14 18 17 -4.45 0.00
 16 18 17 -1.08 0.00
 13 19 17 -0.50 0.00
 15 19 17 3.98 0.00
 12 20 17 -11.74 0.00
 14 20 17 2.84 0.00
 16 20 17 -0.51 0.00
 11 21 17 -8.28 0.00
 13 21 17 1.42 0.00
 15 21 17 -5.79 0.00
 12 22 17 4.59 0.00
 14 22 17 -3.67 0.00
 16 22 17 5.26 0.00
 11 23 17 -6.87 0.00
 13 23 17 -7.62 0.00
 15 23 17 -1.93 0.00
 10 24 17 -0.73 0.00
 12 24 17 -1.64 0.00
 14 24 17 8.81 0.00
 9 25 17 -3.18 0.00
 11 25 17 5.48 0.00
 13 25 17 5.16 0.00
 8 26 17 -10.71 0.00
 10 26 17 -5.09 0.00
 12 26 17 -1.90 0.00
 14 26 17 -6.54 0.00
 7 27 17 -9.02 0.00
 9 27 17 -3.74 0.00
 11 27 17 -10.07 0.00
 13 27 17 -0.60 0.00
 6 28 17 12.64 0.00
 8 28 17 18.16 0.00
 10 28 17 8.48 0.00
 12 28 17 2.81 0.00
 5 29 17 3.60 0.00
 7 29 17 5.95 0.00
 9 29 17 0.20 0.00
 11 29 17 2.54 0.00
 0 30 17 18.62 0.00
 2 30 17 15.25 0.00
 4 30 17 1.92 0.00
 6 30 17 3.12 0.00
 8 30 17 -11.78 0.00
 10 30 17 -5.14 0.00
 12 30 17 -2.93 0.00
 1 31 17 11.16 0.00
 3 31 17 14.76 0.00
 5 31 17 8.67 0.00
 7 31 17 8.22 0.00
 9 31 17 -3.16 0.00
 11 31 17 -0.71 0.00
 0 32 17 -0.82 0.00
 2 32 17 -4.91 0.00
 4 32 17 6.79 0.00
 6 32 17 6.12 0.00
 8 32 17 7.61 0.00
 10 32 17 0.68 0.00
 1 33 17 -9.25 0.00
 3 33 17 -8.48 0.00
 5 33 17 -1.45 0.00
 7 33 17 -6.92 0.00
 9 33 17 0.66 0.00
 0 34 17 -3.21 0.00
 2 34 17 2.53 0.00
 4 34 17 -5.01 0.00
 6 34 17 11.08 0.00
 8 34 17 3.01 0.00
 1 35 17 -0.63 0.00
 3 35 17 5.10 0.00
 5 35 17 6.29 0.00
 7 35 17 5.38 0.00
 0 36 17 4.48 0.00
 2 36 17 -4.13 0.00
 4 36 17 -6.43 0.00
 6 36 17 -2.12 0.00
 1 37 17 -0.76 0.00
 3 37 17 4.92 0.00
 14 0 18 5.80 0.00
 16 0 18 8.14 0.00
 18 0 18 -3.80 0.00
 15 1 18 -13.04 0.00
 17 1 18 4.01 0.00
 14 2 18 7.17 0.00
 16 2 18 -0.02 0.00
 18 2 18 3.81 0.00
 15 3 18 8.83 0.00
 17 3 18 -4.90 0.00
 14 4 18 -1.75 0.00
 16 4 18 8.82 0.00
 18 4 18 -2.02 0.00
 15 5 18 -11.49 0.00
 17 5 18 1.64 0.00
 14 6 18 8.51 0.00
 16 6 18 -2.81 0.00
 15 7 18 11.36 0.00
 17 7 18 1.48 0.00
 14 8 18 -1.40 0.00
 16 8 18 3.74 0.00
 13 9 18 1.01 0.00
 15 9 18 -3.57 0.00
 17 9 18 7.98 0.00
 14 10 18 -4.49 0.00
 16 10 18 -4.77 0.00
 13 11 18 -0.22 0.00
 15 11 18 5.62 0.00
 17 11 18 2.07 0.00
 12 12 18 -9.50 0.00
 14 12 18 -5.06 0.00
 16 12 18 -4.00 0.00
 13 13 18 -6.97 0.00
 15 13 18 -4.78 0.00
 12 14 18 5.36 0.00
 14 14 18 2.04 0.00
 16 14 18 1.57 0.00
 11 15 18 -3.03 0.00
 13 15 18 4.98 0.00
 15 15 18 0.69 0.00
 10 16 18 0.70 0.00
 12 16 18 4.18 0.00
 14 16 18 5.23 0.00
 16 16 18 6.01 0.00
 11 17 18 3.23 0.00
 13 17 18 -3.94 0.00
 15 17 18 2.77 0.00
 10 18 18 0.55 0.00
 12 18 18 -0.23 0.00
 14 18 18 -0.78 0.00
 9 19 18 -2.31 0.00
 11 19 18 0.60 0.00
 13 19 18 6.36 0.00
 15 19 18 -0.01 0.00
 10 20 18 3.92 0.00
 12 20 18 3.85 0.00
 14 20 18 3.26 0.00
 9 21 18 -3.54 0.00
 11 21 18 -7.35 0.00
 13 21 18 -0.57 0.00
 8 22 18 -6.09 0.00
 10 22 18 -6.69 0.00
 12 22 18 0.21 0.00
 14 22 18 -0.32 0.00
 7 23 18 3.57 0.00
 9 23 18 0.44 0.00
 11 23 18 2.58 0.00
 13 23 18 2.34 0.00
 6 24 18 11.60 0.00
 8 24 18 -10.01 0.00
 10 24 18 2.78 0.00
 12 24 18 -3.61 0.00
 5 25 18 -5.11 0.00
 7 25 18 -2.56 0.00
 9 25 18 -1.01 0.00
 11 25 18 -1.27 0.00
 2 26 18 3.19 0.00
 4 26 18 3.34 0.00
 6 26 18 6.53 0.00
 8 26 18 8.16 0.00
 10 26 18 -0.64 0.00
 12 26 18 4.55 0.00
 1 27 18 -15.55 0.00
 3 27 18 -9.99 0.00
 5 27 18 -7.62 0.00
 7 27 18 -2.77 0.00
 9 27 18 -9.08 0.00
 11 27 18 0.00 0.00
 0 28 18 -13.74 0.00
 2 28 18 -12.85 0.00
 4 28 18 -10.14 0.00
 6 28 18 2.71 0.00
 8 28 18 -5.70 0.00
 10 28 18 -0.14 0.00
 1 29 18 -10.20 0.00
 3 29 18 -2.26 0.00
 5 29 18 6.13 0.00
 7 29 18 9.64 0.00
 9 29 18 8.88 0.00
 0 30 18 0.71 0.00
 2 30 18 -2.50 0.00
 4 30 18 -2.19 0.00
 6 30 18 2.75 0.00
 8 30 18 2.80 0.00
 1 31 18 4.62 0.00
 3 31 18 1.63 0.00
 5 31 18 -8.93 0.00
 7 31 18 -6.39 0.00
 0 32 18 10.81 0.00
 2 32 18 8.03 0.00
 4 32 18 2.77 0.00
 6 32 18 2.93 0.00
 1 33 18 -4.12 0.00
 3 33 18 -3.94 0.00
 5 33 18 0.80 0.00
 0 34 18 -0.44 0.00
 2 34 18 -3.55 0.00
 4 34 18 -3.85 0.00
 1 35 18 -4.05 0.00
 12 0 19 -9.47 0.00
 14 0 19 -3.41 0.00
 16 0 19 4.73 0.00
 13 1 19 -5.30 0.00
 15 1 19 5.18 0.00
 12 2 19 2.22 0.00
 14 2 19 -1.38 0.00
 16 2 19 -5.88 0.00
 13 3 19 7.80 0.00
 15 3 19 -6.64 0.00
 12 4 19 -17.75 0.00
 14 4 19 -1.21 0.00
 16 4 19 7.46 0.00
 11 5 19 6.37 0.00
 13 5 19 -18.47 0.00
 15 5 19 -2.30 0.00
 12 6 19 1.97 0.00
 14 6 19 -4.14 0.00
 16 6 19 -6.02 0.00
 11 7 19 -5.69 0.00
 13 7 19 9.60 0.00
 15 7 19 -7.92 0.00
 12 8 19 -15.10 0.00
 14 8 19 -4.33 0.00
 16 8 19 2.73 0.00
 11 9 19 10.27 0.00
 13 9 19 -8.97 0.00
 15 9 19 8.89 0.00
 10 10 19 -6.48 0.00
 12 10 19 2.28 0.00
 14 10 19 -5.01 0.00
 11 11 19 -5.58 0.00
 13 11 19 7.91 0.00
 15 11 19 -5.95 0.00
 10 12 19 0.15 0.00
 12 12 19 -7.34 0.00
 14 12 19 5.00 0.00
 9 13 19 -4.56 0.00
 11 13 19 -2.43 0.00
 13 13 19 -7.96 0.00
 15 13 19 -1.59 0.00
 10 14 19 1.25 0.00
 12 14 19 0.88 0.00
 14 14 19 -4.27 0.00
 9 15 19 3.44 0.00
 11 15 19 0.30 0.00
 13 15 19 -2.38 0.00
 8 16 19 -3.55 0.00
 10 16 19 -6.75 0.00
 12 16 19 -0.29 0.00
 14 16 19 -0.89 0.00
 7 17 19 -6.33 0.00
 9 17 19 -5.43 0.00
 11 17 19 -2.78 0.00
 13 17 19 2.13 0.00
 6 18 19 -0.68 0.00
 8 18 19 -1.37 0.00
 10 18 19 8.04 0.00
 12 18 19 0.73 0.00
 5 19 19 -1.52 0.00
 7 19 19 0.66 0.00
 9 19 19 -3.92 0.00
 11 19 19 -1.90 0.00
 13 19 19 -2.23 0.00
 4 20 19 0.47 0.00
 6 20 19 9.41 0.00
 8 20 19 2.25 0.00
 10 20 19 -3.63 0.00
 12 20 19 1.61 0.00
 3 21 19 -3.92 0.00
 5 21 19 7.71 0.00
 7 21 19 6.17 0.00
 9 21 19 1.73 0.00
 11 21 19 1.79 0.00
 0 22 19 0.05 0.00
 2 22 19 -1.68 0.00
 4 22 19 -1.92 0.00
 6 22 19 -4.82 0.00
 8 22 19 -9.06 0.00
 10 22 19 0.54 0.00
 12 22 19 0.38 0.00
 1 23 19 -18.12 0.00
 3 23 19 -13.00 0.00
 5 23 19 -15.43 0.00
 7 23 19 -6.97 0.00
 9 23 19 -3.15 0.00
 11 23 19 -4.22 0.00
 0 24 19 -3.76 0.00
 2 24 19 7.26 0.00
 4 24 19 3.09 0.00
 6 24 19 15.08 0.00
 8 24 19 -0.56 0.00
 10 24 19 3.27 0.00
 1 25 19 7.50 0.00
 3 25 19 5.50 0.00
 5 25 19 5.82 0.00
 7 25 19 1.48 0.00
 9 25 19 -0.11 0.00
 0 26 19 12.32 0.00
 2 26 19 -1.20 0.00
 4 26 19 -1.78 0.00
 6 26 19 -1.40 0.00
 8 26 19 -3.27 0.00
 1 27 19 3.87 0.00
 3 27 19 5.56 0.00
 5 27 19 -3.65 0.00
 7 27 19 5.37 0.00
 9 27 19 -2.94 0.00
 0 28 19 -9.56 0.00
 2 28 19 -6.21 0.00
 4 28 19 -3.59 0.00
 6 28 19 -0.99 0.00
 8 28 19 0.38 0.00
 1 29 19 -8.62 0.00
 3 29 19 -6.73 0.00
 5 29 19 0.08 0.00
 7 29 19 -2.10 0.00
 0 30 19 -0.92 0.00
 2 30 19 -0.58 0.00
 4 30 19 -1.97 0.00
 6 30 19 11.72 0.00
 1 31 19 -2.26 0.00
 3 31 19 1.31 0.00
 0 32 19 6.09 0.00
 2 32 19 0.77 0.00
 10 0 20 -23.01 0.00
 12 0 20 -11.88 0.00
 14 0 20 1.18 0.00
 9 1 20 7.97 0.00
 11 1 20 7.05 0.00
 13 1 20 -7.30 0.00
 10 2 20 24.40 0.00
 12 2 20 7.71 0.00
 14 2 20 -3.57 0.00
 9 3 20 -3.97 0.00
 11 3 20 -4.73 0.00
 13 3 20 5.91 0.00
 10 4 20 -8.12 0.00
 12 4 20 -1.22 0.00
 14 4 20 9.19 0.00
 9 5 20 -2.10 0.00
 11 5 20 -0.09 0.00
 13 5 20 -8.61 0.00
 8 6 20 -8.32 0.00
 10 6 20 7.16 0.00
 12 6 20 0.67 0.00
 14 6 20 -6.27 0.00
 9 7 20 -5.61 0.00
 11 7 20 0.75 0.00
 13 7 20 7.51 0.00
 8 8 20 18.94 0.00
 10 8 20 4.46 0.00
 12 8 20 0.81 0.00
 14 8 20 5.94 0.00
 7 9 20 -12.59 0.00
 9 9 20 4.05 0.00
 11 9 20 -1.57 0.00
 13 9 20 -5.23 0.00
 8 10 20 -7.00 0.00
 10 10 20 4.66 0.00
 12 10 20 0.83 0.00
 7 11 20 3.19 0.00
 9 11 20 -3.81 0.00
 11 11 20 4.16 0.00
 13 11 20 4.55 0.00
 6 12 20 3.11 0.00
 8 12 20 12.26 0.00
 10 12 20 -0.99 0.00
 12 12 20 3.62 0.00
 5 13 20 -13.51 0.00
 7 13 20 -11.68 0.00
 9 13 20 -4.19 0.00
 11 13 20 -3.79 0.00
 13 13 20 -0.16 0.00
 4 14 20 2.01 0.00
 6 14 20 6.11 0.00
 8 14 20 -9.99 0.00
 10 14 20 0.79 0.00
 12 14 20 -4.10 0.00
 3 15 20 -6.04 0.00
 5 15 20 3.85 0.00
 7 15 20 1.04 0.00
 9 15 20 -3.20 0.00
 11 15 20 2.53 0.00
 2 16 20 -0.71 0.00
 4 16 20 3.96 0.00
 6 16 20 7.20 0.00
 8 16 20 12.09 0.00
 10 16 20 1.92 0.00
 12 16 20 2.03 0.00
 1 17 20 -2.01 0.00
 3 17 20 3.24 0.00
 5 17 20 -2.81 0.00
 7 17 20 -1.18 0.00
 9 17 20 -1.42 0.00
 11 17 20 -4.90 0.00
 0 18 20 6.28 0.00
 2 18 20 10.59 0.00
 4 18 20 1.11 0.00
 6 18 20 5.01 0.00
 8 18 20 -4.23 0.00
 10 18 20 0.79 0.00
 1 19 20 -5.62 0.00
 3 19 20 -3.02 0.00
 5 19 20 1.12 0.00
 7 19 20 -2.90 0.00
 9 19 20 0.13 0.00
 11 19 20 4.24 0.00
 0 20 20 2.82 0.00
 2 20 20 -0.44 0.00
 4 20 20 -2.23 0.00
 6 20 20 -0.83 0.00
 8 20 20 -5.55 0.00
 10 20 20 -0.47 0.00
 1 21 20 0.89 0.00
 3 21 20 3.64 0.00
 5 21 20 6.47 0.00
 7 21 20 10.44 0.00
 9 21 20 0.31 0.00
 0 22 20 2.48 0.00
 2 22 20 3.03 0.00
 4 22 20 1.26 0.00
 6 22 20 7.36 0.00
 8 22 20 0.70 0.00
 1 23 20 2.45 0.00
 3 23 20 1.60 0.00
 5 23 20 0.09 0.00
 7 23 20 0.28 0.00
 0 24 20 -11.77 0.00
 2 24 20 -11.89 0.00
 4 24 20 -14.44 0.00
 6 24 20 -4.74 0.00
 8 24 20 -5.65 0.00
 1 25 20 -7.29 0.00
 3 25 20 6.79 0.00
 5 25 20 4.75 0.00
 7 25 20 9.08 0.00
 0 26 20 5.68 0.00
 2 26 20 0.50 0.00
 4 26 20 2.36 0.00
 6 26 20 3.21 0.00
 1 27 20 8.90 0.00
 3 27 20 -1.55 0.00
 5 27 20 -0.02 0.00
 0 28 20 8.87 0.00
 2 28 20 7.49 0.00
 0 0 21 -2.55 0.00
 2 0 21 -8.30 0.00
 4 0 21 1.29 0.00
 6 0 21 -7.44 0.00
 8 0 21 2.06 0.00
 10 0 21 -8.96 0.00
 12 0 21 -2.13 0.00
 3 1 21 9.86 0.00
 5 1 21 -4.02 0.00
 7 1 21 2.92 0.00
 9 1 21 -1.40 0.00
 11 1 21 -15.77 0.00
 4 2 21 -7.79 0.00
 6 2 21 -0.53 0.00
 8 2 21 -2.01 0.00
 10 2 21 5.68 0.00
 12 2 21 -2.28 0.00
 3 3 21 -9.29 0.00
 5 3 21 9.43 0.00
 7 3 21 -2.05 0.00
 9 3 21 -3.89 0.00
 11 3 21 9.96 0.00
 4 4 21 -4.64 0.00
 6 4 21 -1.56 0.00
 8 4 21 0.64 0.00
 10 4 21 0.75 0.00
 12 4 21 2.21 0.00
 3 5 21 7.49 0.00
 5 5 21 -7.19 0.00
 7 5 21 0.00 0.00
 9 5 21 3.31 0.00
 11 5 21 -7.65 0.00
 0 6 21 -0.63 0.00
 2 6 21 0.93 0.00
 4 6 21 -0.62 0.00
 6 6 21 -3.16 0.00
 8 6 21 0.80 0.00
 10 6 21 1.86 0.00
 12 6 21 -2.35 0.00
 1 7 21 -12.15 0.00
 3 7 21 -5.11 0.00
 5 7 21 3.28 0.00
 7 7 21 -5.59 0.00
 9 7 21 -7.95 0.00
 11 7 21 1.63 0.00
 0 8 21 -2.16 0.00
 2 8 21 1.46 0.00
 4 8 21 -2.75 0.00
 6 8 21 8.68 0.00
 8 8 21 -1.88 0.00
 10 8 21 0.83 0.00
 1 9 21 1.33 0.00
 3 9 21 -2.70 0.00
 5 9 21 -3.10 0.00
 7 9 21 0.32 0.00
 9 9 21 5.75 0.00
 11 9 21 -3.97 0.00
 0 10 21 -3.97 0.00
 2 10 21 4.49 0.00
 4 10 21 -0.57 0.00
 6 10 21 -6.24 0.00
 8 10 21 0.91 0.00
 10 10 21 -2.39 0.00
 1 11 21 -8.82 0.00
 3 11 21 0.68 0.00
 5 11 21 4.66 0.00
 7 11 21 -0.68 0.00
 9 11 21 -6.84 0.00
 11 11 21 2.88 0.00
 0 12 21 5.33 0.00
 2 12 21 -3.72 0.00
 4 12 21 0.65 0.00
 6 12 21 12.34 0.00
 8 12 21 3.83 0.00
 10 12 21 2.56 0.00
 1 13 21 -3.33 0.00
 3 13 21 0.21 0.00
 5 13 21 2.87 0.00
 7 13 21 2.54 0.00
 9 13 21 4.53 0.00
 0 14 21 -7.76 0.00
 2 14 21 -0.30 0.00
 4 14 21 -2.17 0.00
 6 14 21 -3.63 0.00
 8 14 21 -0.91 0.00
 10 14 21 2.17 0.00
 1 15 21 3.04 0.00
 3 15 21 5.55 0.00
 5 15 21 -0.34 0.00
 7 15 21 -3.28 0.00
 9 15 21 -6.01 0.00
 0 16 21 -1.53 0.00
 2 16 21 -4.48 0.00
 4 16 21 -1.70 0.00
 6 16 21 4.25 0.00
 8 16 21 0.80 0.00
 1 17 21 -5.06 0.00
 3 17 21 -1.34 0.00
 5 17 21 0.77 0.00
 7 17 21 2.70 0.00
 9 17 21 1.73 0.00
 0 18 21 -4.69 0.00
 2 18 21 3.70 0.00
 4 18 21 -5.08 0.00
 6 18 21 6.77 0.00
 8 18 21 -2.73 0.00
 1 19 21 2.62 0.00
 3 19 21 1.81 0.00
 5 19 21 1.58 0.00
 7 19 21 -1.79 0.00
 0 20 21 2.79 0.00
 2 20 21 -1.78 0.00
 4 20 21 -0.72 0.00
 6 20 21 1.12 0.00
 1 21 21 -0.96 0.00
 3 21 21 1.45 0.00
 5 21 21 -1.47 0.00
 0 22 21 3.62 0.00
 2 22 21 0.65 0.00
 4 22 21 -0.10 0.00
 1 23 21 1.89 0.00
 3 23 21 5.91 0.00
 0 24 21 11.15 0.00
 2 24 21 3.92 0.00
 0 0 0 0.00 0.00
# SQUEEZE RESULTS (Version = 150216)
# Note: Data are Listed for all Voids in the P1 Unit Cell
# i.e. Centre of Gravity, Solvent Accessible Volume,
# Recovered number of Electrons in the Void and
# Details about the Squeezed Material
;
loop_
  _platon_missing_refln_index_h
  _platon_missing_refln_index_k
  _platon_missing_refln_index_l
  _platon_missing_refln_theta
 0 2 0 2.090
 0 0 1 2.467
 0 2 1 3.234
 0 4 3 8.528
 0 0 8 20.140

_platon_squeeze_details
;
TITL 2 in Cmma
CELL   21.8356   42.2790   17.9114     90.00     90.00     90.00
SPGR Cmma
# Solvent Accessible Volume =      8817
# Electrons Found in S.A.V. =      2242
# Note: Atoms in Void as Cxxx and Qxxx all others
C101 0.891 0.484 0.043 !       3.94 eA-3
C102 0.133 0.500 0.000 !       3.45 eA-3
C103 0.500 0.194 0.024 !       2.94 eA-3
C104 1.000 0.194 0.478 !       2.76 eA-3
C105 0.500 0.332 0.138 !       2.26 eA-3
C106 0.742 0.152 0.240 !       2.12 eA-3
C107 0.211 0.126 0.245 !       1.95 eA-3
C108 1.000 0.448 0.245 !       1.94 eA-3
C109 0.789 0.193 0.178 !       1.85 eA-3
C110 0.500 0.358 0.138 !       1.79 eA-3
C111 0.500 0.311 0.075 !       1.77 eA-3
C112 0.327 0.144 0.253 !       1.68 eA-3
C113 0.500 0.464 0.224 !       1.59 eA-3
C114 0.500 0.421 0.333 !       1.54 eA-3
Q115 0.617 0.249 0.109 !       1.53 eA-3
C116 0.196 0.325 0.227 !       1.52 eA-3
C117 1.000 0.049 0.300 !       1.44 eA-3
C118 1.000 0.456 0.325 !       1.44 eA-3
C119 1.000 0.432 0.201 !       1.41 eA-3
C120 0.500 0.498 0.118 !       1.31 eA-3
Q121 0.640 0.253 0.094 !       1.31 eA-3
C122 0.743 0.319 0.201 !       1.29 eA-3
C123 1.000 0.495 0.449 !       1.28 eA-3
Q124 0.725 0.250 0.297 !       1.28 eA-3
C125 0.031 0.468 0.362 !       1.27 eA-3
C126 0.261 0.296 0.371 !       1.26 eA-3
C127 0.500 0.500 0.500 !       1.26 eA-3
C128 0.500 0.317 0.420 !       1.25 eA-3
Q129 0.625 0.248 0.047 !       1.25 eA-3
C130 0.500 0.176 0.392 !       1.25 eA-3
Q131 0.577 0.248 0.438 !       1.23 eA-3
C132 0.500 0.048 0.286 !       1.23 eA-3
Q133 0.733 0.209 0.129 !       1.22 eA-3
C134 0.078 0.075 0.215 !       1.20 eA-3
C135 0.500 0.371 0.401 !       1.20 eA-3
C136 1.000 0.495 0.338 !       1.19 eA-3
Q137 0.540 0.229 0.499 !       1.18 eA-3
C138 1.000 0.468 0.400 !       1.18 eA-3
C139 0.953 0.070 0.234 !       1.18 eA-3
C140 0.500 0.028 0.492 !       1.15 eA-3
C141 1.000 0.018 0.492 !       1.15 eA-3
C142 1.000 0.483 0.363 !       1.14 eA-3
Q143 0.283 0.252 0.125 !       1.12 eA-3
C144 0.500 0.416 0.416 !       1.12 eA-3
C145 0.508 0.383 0.395 !       1.09 eA-3
C146 0.500 0.195 0.446 !       1.08 eA-3
Q147 1.000 0.194 0.132 !       1.05 eA-3
Q148 0.775 0.236 0.138 !       1.04 eA-3
Q149 0.444 0.275 0.440 !       1.03 eA-3
C150 1.000 0.027 0.010 !       1.02 eA-3
C151 0.835 0.120 0.222 !       1.01 eA-3
Q152 0.724 0.261 0.340 !       1.00 eA-3
C153 0.500 0.378 0.433 !       0.96 eA-3
Q154 0.226 0.235 0.331 !       0.96 eA-3
C155 0.500 0.170 0.487 !       0.95 eA-3
C156 0.031 0.500 0.000 !       0.94 eA-3
Q157 0.500 0.250 0.484 !       0.94 eA-3
Q158 1.000 0.251 0.078 !       0.92 eA-3
Q159 0.360 0.268 0.443 !       0.91 eA-3
Q160 0.079 0.248 0.047 !       0.90 eA-3
C161 0.320 0.268 0.470 !       0.89 eA-3
C162 0.516 0.404 0.361 !       0.87 eA-3
C163 0.369 0.196 0.354 !       0.87 eA-3
C164 0.500 0.058 0.385 !       0.86 eA-3
Q165 0.611 0.221 0.432 !       0.86 eA-3
C166 0.500 0.013 0.351 !       0.85 eA-3
Q167 0.500 0.220 0.055 !       0.83 eA-3
C168 0.500 0.439 0.453 !       0.83 eA-3
C169 0.438 0.166 0.163 !       0.83 eA-3
Q170 0.272 0.247 0.406 !       0.82 eA-3
C171 0.500 0.297 0.376 !       0.82 eA-3
Q172 0.446 0.278 0.040 !       0.80 eA-3
Q173 0.946 0.778 0.040 !       0.80 eA-3
Q174 0.054 0.285 0.946 !       0.80 eA-3
Q175 0.554 0.785 0.946 !       0.80 eA-3
Q176 0.977 0.254 0.484 !       0.80 eA-3
C177 0.320 0.197 0.358 !       0.79 eA-3
C178 0.617 0.288 0.100 !       0.78 eA-3
Q179 0.547 0.221 0.094 !       0.78 eA-3
C180 0.500 0.176 0.254 !       0.78 eA-3
C181 1.000 0.445 0.152 !       0.77 eA-3
C182 0.979 0.045 0.139 !       0.77 eA-3
Q183 0.257 0.246 0.250 !       0.76 eA-3
Q184 1.000 0.275 0.158 !       0.75 eA-3
C185 1.000 0.031 0.125 !       0.73 eA-3
C186 0.297 0.250 0.219 !       0.73 eA-3
C187 0.455 0.353 0.396 !       0.73 eA-3
Q188 0.969 0.320 0.219 !       0.72 eA-3
C189 0.290 0.275 0.066 !       0.72 eA-3
C190 0.500 0.397 0.472 !       0.72 eA-3
C191 0.500 0.195 0.219 !       0.72 eA-3
Q192 0.437 0.250 0.109 !       0.71 eA-3
C193 0.446 0.286 0.344 !       0.71 eA-3
Q194 0.460 0.249 0.453 !       0.70 eA-3
C195 1.000 0.050 0.436 !       0.70 eA-3
C196 1.000 0.475 0.208 !       0.69 eA-3
C197 0.531 0.318 0.193 !       0.69 eA-3
Q198 0.265 0.497 0.081 !       0.69 eA-3
C199 1.000 0.069 0.016 !       0.68 eA-3
;
loop_
  _platon_squeeze_void_nr
  _platon_squeeze_void_average_x
  _platon_squeeze_void_average_y
  _platon_squeeze_void_average_z
  _platon_squeeze_void_volume
  _platon_squeeze_void_count_electrons
  _platon_squeeze_void_content
 1 -0.017 0.007 -0.006 8807 2245 ' '

_platon_squeeze_void_probe_radius  1.20
loop_
  _refln_index_h
  _refln_index_k
  _refln_index_l
  _refln_F_squared_meas
  _refln_F_squared_sigma
  _refln_scale_group_code
 0 0 2 117093 1203.15 1
 0 0 3 178.365 79.8844 1
 0 0 4 106314 1668.34 1
 0 0 5 9997.66 596.018 1
 0 0 6 43316.2 1353.43 1
 0 0 7 40200.1 1425.9 1
 0 0 9 596088 5136.62 2
 0 0 -10 17775.7 870.844 3
 0 0 -11 359342 4119.1 3
 0 0 -12 8701.55 687.865 3
 0 0 -13 40557.3 1531.73 3
 0 0 -14 389.425 200.447 3
 0 0 -15 -101.444 235.378 3
 0 0 -16 1358.13 314.482 3
 0 0 -17 8067.61 741.637 3
 0 0 -18 34126 1463.18 3
 0 0 -19 11077.2 785.304 3
 0 0 -20 13783 789.53 3
 0 2 2 238506 1779.37 1
 0 2 3 6034.43 357.609 1
 0 -2 3 5331.13 324.872 1
 0 -2 4 46919.7 1097.41 1
 0 2 4 45161.5 1118.44 1
 0 2 5 274243 3090.78 1
 0 -2 5 267962 2958.15 1
 0 -2 6 47925.8 1397.84 1
 0 2 6 46010.4 1401.14 1
 0 -2 7 5185.82 517.081 1
 0 -2 8 75309.7 2121.76 1
 0 2 8 72138.9 1541.14 2
 0 -2 9 386556 4381.05 2
 0 2 9 391776 3812.39 2
 0 2 -9 401347 3835.12 3
 0 2 -10 3129.72 390.049 3
 0 -2 10 3219.29 426.108 2
 0 -2 -10 3488.59 392.462 3
 0 2 -11 278983 3609.94 3
 0 -2 -11 272692 3573.07 3
 0 2 -12 2847.27 414.247 3
 0 -2 -12 3019.49 404.134 3
 0 2 -13 34508.3 1421.38 3
 0 -2 -13 35131.6 1425.39 3
 0 2 -14 228.551 145.594 3
 0 -2 -14 162.908 138.817 3
 0 2 -15 6776.93 667.088 3
 0 -2 -15 6625.99 669.025 3
 0 2 -16 1564.33 318.083 3
 0 -2 -16 1858.12 350.763 3
 0 -2 -17 42.4841 182.416 3
 0 2 -17 -25.1408 183.026 3
 0 -2 -18 25000.3 1238.5 3
 0 2 -18 25040 1277.17 3
 0 -2 -19 2910.54 409.869 3
 0 2 -19 3697.37 473.089 3
 0 -2 -20 102552 2087.65 3
 0 2 -20 104522 2203.07 3
 0 2 -21 946.056 219.208 4
 0 -4 0 568885 2071.17 2
 0 -4 -1 6371.94 155.423 2
 0 4 1 6235.9 159.357 2
 0 -4 -2 355330 2342.08 1
 0 -4 4 557140 3724.43 1
 0 -4 5 113894 1908.07 1
 0 -4 6 241429 3100.56 1
 0 -4 7 9878.5 701.671 1
 0 -4 8 3014.62 391.282 2
 0 -4 8 3472.63 474.037 1
 0 4 8 2585.73 269.26 2
 0 4 9 490037 3891.16 2
 0 4 -9 493369 4299.53 3
 0 -4 9 479878 5139 2
 0 4 -10 3476.86 396.56 3
 0 -4 -10 3139.92 367.147 3
 0 -4 10 2729.29 413.542 2
 0 -4 -11 54568.9 1597.11 3
 0 4 -11 53846.9 1605.25 3
 0 4 -12 2082.61 349.301 3
 0 -4 -12 1514.12 308.633 3
 0 4 -13 2771.05 439.489 3
 0 -4 -13 2889.14 431.138 3
 0 4 -14 3052.22 463.856 3
 0 -4 -14 2800.65 425.104 3
 0 4 -15 43939.5 1733.2 3
 0 -4 -15 45114.2 1689.55 3
 0 4 -16 36927.1 1601.5 3
 0 -4 -16 35559.1 1520.29 3
 0 4 -17 3806.08 538.885 3
 0 -4 -17 4213.56 525.094 3
 0 4 -18 267.498 183.026 3
 0 -4 -18 334.858 161.43 3
 0 4 -19 15235.7 950.535 3
 0 -4 -19 15714.7 894.799 3
 0 -4 -20 69636 1665.74 3
 0 4 -21 186.761 132.085 4
 0 -6 0 89800.8 994.959 2
 0 -6 -1 5963.31 215.274 2
 0 6 2 74906.1 602.494 2
 0 -6 -2 77806.2 1155.64 1
 0 -6 -3 1166.39 175.097 1
 0 6 3 1119.5 70.5642 2
 0 6 4 292994 1527.08 2
 0 -6 -5 271249 3157.06 1
 0 -6 5 277359 2966.25 1
 0 -6 6 67937.9 1627.12 1
 0 6 7 107525 1349.7 2
 0 -6 7 101365 2213.8 1
 0 6 8 2875.32 241.39 2
 0 -6 8 3384.81 459.466 1
 0 -6 8 3452.54 438.406 2
 0 6 -9 225522 2922 3
 0 -6 9 223159 3723.15 2
 0 6 -10 4911.24 481.738 3
 0 -6 -10 4350.43 437.677 3
 0 6 -11 39379 1388.63 3
 0 -6 -11 41568 1405.59 3
 0 -6 -12 2163.16 354.277 3
 0 6 -12 2306.95 381.886 3
 0 6 -13 42707.8 1603.34 3
 0 -6 -13 40733.8 1504.7 3
 0 6 -14 25426.4 1278.67 3
 0 -6 -14 21479.3 1143.08 3
 0 -6 -15 111153 2616.98 3
 0 6 -15 111383 2753.38 3
 0 -6 -16 82731.3 2274.82 3
 0 6 -16 88406.2 2510.88 3
 0 6 -17 50463.4 1871.08 3
 0 -6 -17 51425.8 1745.64 3
 0 6 -18 19402.7 1130.99 3
 0 -6 -18 19715.4 1037.86 3
 0 -6 -19 5038.81 505.089 3
 0 6 -19 5110.54 562.868 3
 0 6 -20 13052.4 765.581 4
 0 -8 0 76755.1 1062.02 2
 0 -8 -1 5404.65 253.772 2
 0 -8 1 5094.85 315.138 2
 0 -8 -2 252970 1478.46 2
 0 -8 -3 153982 1990.87 1
 0 -8 -4 4195.73 371.198 1
 0 -8 5 95141.3 1736.11 1
 0 -8 -5 94713.1 1915.9 1
 0 -8 -6 150693 2620.58 1
 0 -8 6 152615 2465.47 1
 0 8 7 136000 1120.53 2
 0 -8 7 136468 2578.46 1
 0 -8 8 13589.9 914.359 1
 0 -8 8 13619.6 900.083 2
 0 8 -9 101.75 102.625 3
 0 8 -10 433.637 193.926 3
 0 8 -11 159493 2805.85 3
 0 -8 -11 165924 2804.05 3
 0 -8 -12 379.632 172.281 3
 0 8 -12 292.315 177.762 3
 0 8 -13 68647.8 2027.47 3
 0 -8 -13 69924.9 1960.1 3
 0 -8 -14 60826.7 1878.23 3
 0 8 -14 58488.3 1962.24 3
 0 -8 -15 198031 3431.54 3
 0 8 -15 202148 3717.43 3
 0 8 -16 140749 3152.21 3
 0 -8 -16 134441 2838.42 3
 0 8 -17 5779.49 645.286 3
 0 -8 -17 6180.85 594.426 3
 0 -8 18 478.614 283.92 5
 0 -8 -18 143.978 138.561 3
 0 8 -18 171.855 204.835 3
 0 8 -19 346.042 191.918 3
 0 8 -19 41.6924 128.537 4
 0 8 -20 7610.22 568.859 4
 0 -10 0 375891 2741.9 2
 0 -10 1 2889.84 265.207 2
 0 -10 -1 3594.03 248.28 2
 0 -10 -2 37045.9 657.051 2
 0 -10 -3 15135.5 662.034 1
 0 -10 -4 249673 2933.96 1
 0 -10 -5 321870 3654.02 1
 0 -10 -6 322514 3986.21 1
 0 -10 6 321271 3596.35 1
 0 -10 7 535857 5128.45 1
 0 -10 7 555117 5598.18 2
 0 -10 8 6217.24 618.128 1
 0 10 -8 8298.66 556.114 3
 0 -10 8 6911.26 678.76 2
 0 10 -9 43931.8 1334.99 3
 0 10 -10 27931.3 1130.39 3
 0 10 -11 43955.9 1482.07 3
 0 -10 -11 42790.4 1430.22 3
 0 -10 -12 273.198 141.719 3
 0 10 -12 370.577 153.142 3
 0 10 -13 45602.4 1679.94 3
 0 -10 -13 45637.4 1564.91 3
 0 -10 -14 22623.2 1144.66 3
 0 10 -14 25272.4 1324.47 3
 0 -10 -15 199214 3391.46 3
 0 10 -15 193865 3676.88 3
 0 10 -16 45765.4 1794.84 3
 0 -10 -16 45260.3 1605.23 3
 0 -10 -17 15030.3 912.411 3
 0 10 -17 14030 993.645 3
 0 10 -18 11103.3 796.172 4
 0 -10 18 12512.4 955.341 5
 0 10 -18 11941.4 890.163 3
 0 10 -19 -207.071 186.677 4
 0 10 -20 670.501 202.413 4
 0 -12 0 467939 3319.43 2
 0 -12 -1 12886.4 505.9 2
 0 -12 1 12307 584.332 2
 0 -12 -2 6730 329.421 2
 0 -12 2 6332.74 458.198 2
 0 -12 -3 39439.5 1112.01 1
 0 -12 3 38297.5 1203.92 2
 0 -12 -4 52568.7 1400.92 1
 0 -12 4 53003.9 1498.4 2
 0 -12 -5 212052 3063.97 1
 0 -12 5 231685 3339.88 2
 0 -12 6 162574 2583.88 1
 0 -12 6 169426 3053.67 2
 0 -12 -6 160284 2892.42 1
 0 -12 7 436300 4673.94 1
 0 -12 7 456281 5364.06 2
 0 -12 8 308.266 176.1 1
 0 12 -8 373.511 148.127 3
 0 12 -9 230805 3084.21 3
 0 12 -10 10787.5 709.134 3
 0 -12 -11 54755.5 1610.17 3
 0 12 -11 54586.3 1685.5 3
 0 -12 -12 1580.1 291.369 3
 0 12 -12 1087.52 274.404 3
 0 -12 -13 522.165 191.574 3
 0 12 -13 252.811 163.965 3
 0 -12 -14 16955.6 987.569 3
 0 12 -14 16637.7 1077.63 3
 0 12 -15 54036.7 1933.81 3
 0 -12 -15 53687.5 1731.27 3
 0 12 -16 44915.2 1791.9 3
 0 12 -17 7482.02 663.314 4
 0 12 -17 8842.16 795.244 3
 0 -12 18 3767.55 544.252 5
 0 12 -18 2883.11 398.307 4
 0 12 -18 3754.82 509.673 3
 0 -12 19 347.467 221.878 5
 0 12 -19 47.8269 119.923 4
 0 12 -20 3009.1 368.287 4
 0 -14 0 416017 3505.36 2
 0 -14 -1 1359.45 189.813 2
 0 -14 1 1398.74 239.982 2
 0 -14 2 58873.5 1491.5 2
 0 -14 -2 66177.5 1136.03 2
 0 -14 -3 559.368 157.968 1
 0 -14 -3 454.392 101.34 2
 0 -14 3 392.541 144.913 2
 0 -14 4 84035.7 2004.84 2
 0 -14 -4 81663.9 1806.02 1
 0 -14 5 53756.6 1695.8 2
 0 -14 -5 43989.4 1447.51 1
 0 -14 -6 317143 4195.91 1
 0 -14 6 319842 3675 1
 0 -14 6 326610 4458.88 2
 0 -14 7 12934.4 809.8 1
 0 14 -7 14280.5 704.506 3
 0 14 -8 1212.98 242.781 3
 0 -14 8 1149.56 275.725 1
 0 14 -9 85019.6 1779.89 6
 0 14 -9 85051.7 1916.09 3
 0 14 -10 7481.58 622.785 3
 0 14 -11 88994.1 2207.51 3
 0 -14 -11 91276 2074.88 3
 0 14 -12 4536.37 528.087 3
 0 -14 -12 4893.06 499.888 3
 0 14 -13 4966.43 595.673 3
 0 14 -14 139.529 190.495 3
 0 14 -15 59616.1 2044.26 3
 0 14 -15 58302.7 1934.39 4
 0 14 -16 33850.8 1551.3 3
 0 14 -16 32100 1392.62 4
 0 14 -17 612.984 165.551 4
 0 14 -17 1096.95 307.927 3
 0 14 -18 1996.54 332.943 4
 0 -14 18 2569.68 467.025 5
 0 -14 19 9739.18 804.559 5
 0 14 -19 9324.44 653.466 4
 0 14 -20 31540.9 1093.32 4
 0 -16 0 303096 3235.08 2
 0 -16 -1 35043.3 996.377 2
 0 -16 1 36849.2 1205.41 2
 0 -16 -2 110781 1629.09 2
 0 -16 2 109209 2228.65 2
 0 -16 -2 104583 1797.41 1
 0 -16 3 6269.89 556.285 2
 0 -16 -3 5864.59 364.833 2
 0 -16 -3 5635.34 466.235 1
 0 -16 -4 47833.6 1452.56 1
 0 -16 4 48191.4 1614.03 2
 0 -16 5 127308 2761.97 2
 0 -16 -5 113001 2413.61 1
 0 -16 -6 1506.18 304.796 1
 0 16 -6 1653.01 231.095 4
 0 -16 6 1314.08 238.885 1
 0 16 -7 4233.07 374.93 4
 0 16 -7 4786.49 435.008 3
 0 16 -7 4566.1 415.376 6
 0 16 -8 25516.4 983.21 6
 0 16 -8 26203.3 996.296 4
 0 16 -8 27469.5 1071.65 3
 0 16 -9 276787 3482.83 4
 0 16 -9 270607 3311.77 6
 0 16 -9 275352 3550.78 3
 0 16 -10 12474.6 829.184 3
 0 16 -10 12915.9 747.611 6
 0 16 -11 200267 3371.54 3
 0 16 -12 760.017 265.885 3
 0 16 -12 890.902 251.515 4
 0 16 -13 6603.4 670.771 3
 0 16 -13 6762.47 670.641 4
 0 16 -14 9198.12 824.757 3
 0 16 -14 8930.87 760.49 4
 0 16 -15 10509.1 811.807 4
 0 16 -15 11487.3 916.719 3
 0 16 -16 1268.57 278.813 4
 0 16 -16 1899.62 402.966 3
 0 16 -17 727.855 215.393 4
 0 16 -18 18739.9 976.112 4
 0 -16 18 19834.2 1178.02 5
 0 16 -19 7607.63 591.67 4
 0 -16 19 7200.27 683.295 5
 0 16 -20 86633.7 1750.03 4
 0 -18 0 586275 4765.36 2
 0 -18 -1 265.322 107.95 2
 0 -18 1 620.557 196.289 2
 0 -18 -2 9088.71 506.913 2
 0 -18 2 8537.67 669.269 2
 0 -18 -2 8411.95 545.898 1
 0 -18 -3 260.703 104.698 2
 0 -18 -3 12.7387 116.721 1
 0 -18 3 -17.0657 131.996 2
 0 -18 -4 31389.4 1234.92 1
 0 -18 4 30419.5 1397.77 2
 0 18 -5 3589.84 345.555 4
 0 18 -5 3203.57 347.075 6
 0 -18 -5 3748.1 460.041 1
 0 18 -6 1472.15 255.695 6
 0 18 -6 1662.28 238.916 4
 0 18 -6 2112.34 280.905 3
 0 -18 -6 1093.59 251.72 1
 0 18 -7 26077.9 1032.11 6
 0 18 -7 28765.9 1067.64 3
 0 18 -7 26463.8 969.903 4
 0 18 -8 6369.83 525.357 4
 0 18 -8 6789.72 544.426 6
 0 18 -8 6029.76 520.664 3
 0 18 -9 215070 3217.3 3
 0 18 -9 205668 3018.84 6
 0 18 -9 210055 3069.65 4
 0 18 -10 142.631 157.038 6
 0 18 -10 936.289 330.675 3
 0 18 -10 1352.83 377.216 4
 0 18 -11 70764.2 2029.67 3
 0 18 -11 72003.9 2027.45 4
 0 18 -12 2883.94 468.381 3
 0 18 -12 2517.96 424.13 4
 0 18 -13 2053.09 409.837 3
 0 18 -13 1821.43 379.364 4
 0 18 -14 12872.4 916.557 4
 0 18 -14 14590.6 1012.05 3
 0 18 -15 28946.4 1335.74 4
 0 18 -15 29905.5 1439.83 3
 0 18 -16 14823.1 942.675 4
 0 18 -17 49.9376 124.83 4
 0 18 -18 20607.2 1001.65 4
 0 -18 18 21413.9 1204.24 5
 0 -18 19 16137.1 971.609 5
 0 18 -19 16516.3 824.6 4
 0 -20 0 461948 4470.17 2
 0 -20 1 6246.69 587.759 2
 0 -20 -1 5082.89 430.88 2
 0 -20 -2 1225.12 212.865 2
 0 -20 -2 1136.64 224.393 1
 0 -20 2 1372.11 302.604 2
 0 20 -3 19306.1 856.744 6
 0 20 -3 18284.7 758.46 4
 0 -20 -3 17458.3 891.449 1
 0 -20 -3 17789.2 736.138 2
 0 -20 3 20726.4 1163.17 2
 0 20 -4 1217.98 215.992 4
 0 -20 -4 1012.01 230.2 1
 0 20 -4 1492.06 250.834 6
 0 20 -5 52229.5 1352.32 4
 0 20 -5 54570.5 1488.51 6
 0 20 -6 75880.5 1686.84 4
 0 20 -6 78259.1 1832.2 6
 0 20 -7 27340.1 1048 4
 0 20 -7 27805.9 1119.79 6
 0 20 -7 30741.4 1132.96 3
 0 20 -8 30831.8 1192.7 3
 0 20 -8 28033.5 1154.75 6
 0 20 -8 28082.9 1103.68 4
 0 20 -9 148713 2665.63 4
 0 20 -9 144962 2670.02 6
 0 20 -10 12695.9 847.587 4
 0 20 -10 12359.2 776.179 6
 0 20 -10 12800.4 871.252 3
 0 20 -11 126585 2759.06 3
 0 20 -11 126302 2749.3 4
 0 20 -11 129095 2556.56 6
 0 20 -12 1364.4 386.793 3
 0 20 -12 1340.41 350.863 4
 0 20 -13 13660.9 955.869 4
 0 20 -13 13650.8 982.329 3
 0 20 -14 317.07 194.563 4
 0 20 -15 45711.6 1697.92 4
 0 20 -16 30482.4 1354.69 4
 0 20 -17 718.879 204.588 4
 0 20 -18 11524 723.993 4
 0 -20 18 11645.2 860.008 5
 0 -20 19 2652.57 405.898 5
 0 20 -19 2921.21 340.813 4
 0 22 0 524866 4464.54 6
 0 -22 0 508986 5005.33 2
 0 -22 1 10618 796.953 2
 0 22 -1 9876.25 635.326 6
 0 -22 -1 9995.12 643.16 2
 0 22 -2 2806.74 346.7 6
 0 -22 -2 2498.63 329.582 1
 0 -22 2 3582.92 513.934 2
 0 22 -2 2981.37 320.363 4
 0 22 -3 42579.8 1209.21 4
 0 22 -3 43554.4 1352.47 6
 0 -22 -3 44164.3 1476.67 1
 0 22 -4 368618 3677.34 4
 0 22 -4 370809 3994.02 6
 0 -22 -4 365044 4584.71 1
 0 22 -5 72334.1 1802.07 6
 0 22 -5 73190.2 1682.86 4
 0 22 -6 55681.9 1506.86 4
 0 22 -6 54510.5 1591.16 6
 0 22 -7 17164.7 856.246 4
 0 22 -7 19702.4 981.638 6
 0 22 -8 -3.73416 183.049 4
 0 22 -8 153.487 139.379 6
 0 22 -9 29407.8 1241.19 6
 0 22 -9 31261.9 1295.95 4
 0 22 -10 1072.54 297.22 4
 0 22 -10 553.578 149.481 6
 0 22 -11 18861.7 1016.91 6
 0 22 -11 18805.9 1106.06 4
 0 22 -12 637.297 298.815 4
 0 22 -13 12579.6 948.09 4
 0 22 -14 17766.1 1111.4 4
 0 22 -15 57424.2 1898.58 4
 0 22 -16 18012 1013.29 4
 0 22 -17 4417.32 473.092 4
 0 -22 18 102.873 213.928 5
 0 22 -18 -103.118 124.474 4
 0 -24 0 206277 3348.16 2
 0 24 0 212075 3023.46 6
 0 -24 1 527.917 186.051 2
 0 24 -1 1169.53 253.557 6
 0 24 1 1052.3 229.724 6
 0 24 2 35.2647 84.4914 6
 0 24 -2 224.888 152.111 6
 0 24 -2 110.126 115.113 4
 0 24 -3 19203.4 943.64 6
 0 24 -3 18711.2 845.928 4
 0 24 3 20544.9 897.913 6
 0 24 -4 310484 3827.99 6
 0 24 -4 311017 3541.59 4
 0 24 -5 249946 3258.39 4
 0 24 -5 249968 3491.86 6
 0 24 -6 108401 2367.15 6
 0 24 -6 111297 2221.71 4
 0 24 -7 153587 2850.84 6
 0 24 -7 150618 2657.68 4
 0 24 -8 649.639 215.25 4
 0 24 -8 -1.46886 289.082 6
 0 24 -9 38023.2 1441.99 4
 0 24 -9 36829.9 1441.78 6
 0 24 -10 246.933 215.603 4
 0 24 -10 -167.672 280.801 6
 0 24 -11 5132.1 600.25 4
 0 24 -11 5921.07 598.859 6
 0 24 -12 4539.17 531.531 6
 0 24 -12 4231.17 563.114 4
 0 24 -13 2170.22 394.158 4
 0 24 -14 23793.1 1261.14 4
 0 24 -15 71486.7 2073.16 4
 0 24 -16 52692.6 1673.98 4
 0 24 -17 24282.4 1049.19 4
 0 24 -18 2867.88 329.16 4
 0 -24 18 2628 395.169 5
 0 26 0 90362.9 2066.01 6
 0 26 1 1123.98 267.724 6
 0 26 -1 683.996 213.245 6
 0 26 -2 8207.94 638.594 6
 0 26 2 8403.22 625.172 6
 0 26 3 36825.3 1268.93 6
 0 26 -3 36391.4 1220.7 4
 0 26 -3 35838.1 1355.36 6
 0 26 -4 235391 3482.89 6
 0 26 -4 242048 3223.42 4
 0 26 -5 232370 3534.95 6
 0 26 -5 239117 3297.1 4
 0 26 -6 201503 3079.11 4
 0 26 -6 198502 3327.14 6
 0 26 -7 54786.2 1798.69 6
 0 26 -7 54357.5 1664.5 4
 0 26 -8 156.499 147.95 4
 0 26 -8 -550.143 343.792 6
 0 26 -9 9244.76 729.584 4
 0 26 -9 7244.97 651.235 6
 0 26 -10 10040.3 815.401 4
 0 26 -10 9269.26 758.151 6
 0 26 -11 3671.58 484.603 6
 0 26 -11 3711.1 518.837 4
 0 26 -12 2776.51 465.517 6
 0 26 -12 2350.97 448.176 4
 0 26 -13 74848 2254.54 4
 0 26 -14 4360.7 545.403 4
 0 26 -15 101171 2422.82 4
 0 26 -16 54826 1646.67 4
 0 26 -17 14992 785.893 4
 0 -26 17 14698.5 947.492 5
 0 26 -18 4128.79 368.989 4
 0 28 0 72442 1942.6 6
 0 28 1 4020.02 466.36 6
 0 28 -1 4134.62 489.644 6
 0 28 -2 403.261 207.294 6
 0 28 2 373.508 205.334 6
 0 28 3 5903.87 557.277 6
 0 28 -3 5353.88 560.91 6
 0 28 -4 127409 2445.69 4
 0 28 -4 123485 2659.1 6
 0 28 -5 135062 2558.59 4
 0 28 -5 132921 2800.71 6
 0 28 -6 45834.2 1515.75 4
 0 28 -6 47216.9 1703.01 6
 0 28 -7 19518.1 1098.66 6
 0 28 -7 26099.7 1187.3 4
 0 28 -8 -77.6211 201.65 4
 0 28 -8 -349.46 363.612 6
 0 28 -9 73354.9 2091.37 4
 0 28 -9 71494.6 2182.61 6
 0 28 -10 974.18 294.603 6
 0 28 -10 1243.39 384.415 4
 0 28 -11 11127.1 860.102 6
 0 28 -11 11561.1 886.671 4
 0 28 -12 419.799 214.746 6
 0 28 -12 28.3101 269.682 4
 0 28 -13 48546.4 1801.83 4
 0 28 -14 34230 1449.47 4
 0 28 -15 80284.6 2072.97 4
 0 28 -16 52932.8 1542.09 4
 0 28 -17 8605.51 555.042 4
 0 -28 17 7711.24 660.984 5
 0 30 0 78774.7 2106.63 6
 0 30 -1 490.644 236.897 6
 0 30 1 653.049 273.047 6
 0 30 2 2104.56 360.929 6
 0 30 -2 1987.77 397.834 6
 0 30 3 10363.2 734.202 6
 0 30 -3 12222.3 876.926 6
 0 30 -4 71990.3 2114.93 6
 0 30 -5 4717.75 509.623 4
 0 30 -5 5056.95 595.209 6
 0 30 -6 5480.85 557.134 4
 0 30 -6 4726.04 575.478 6
 0 30 -7 38557.2 1466.6 4
 0 30 -7 31068.4 1449.41 6
 0 30 -8 985.987 217.565 6
 0 30 -8 1376.42 298.324 4
 0 30 -9 85433.6 2278.21 4
 0 30 -9 81816.4 2374.46 6
 0 30 -10 5738.64 661.314 4
 0 30 -10 5449.32 642.644 6
 0 30 -11 98188.4 2551.46 4
 0 30 -11 95639.3 2500.79 6
 0 30 -12 1758.25 352.031 4
 0 30 -12 2027.53 411.733 6
 0 30 -13 8246.94 724.673 4
 0 30 -14 23360.9 1154.36 4
 0 30 -15 89927.3 2068.83 4
 0 30 -16 9003.79 600.378 4
 0 -30 16 8360.94 736.737 5
 0 32 0 297323 4212.37 6
 0 32 -1 12156.7 896.548 6
 0 32 1 13549.1 915.147 6
 0 32 -2 54782.2 1854.12 6
 0 32 2 43476.8 1563.83 6
 0 32 -3 663.984 309.929 6
 0 32 3 -257.795 268.46 6
 0 32 -4 7070.78 735.661 6
 0 32 -5 1905.2 335.766 6
 0 32 -6 69244 1956.75 4
 0 32 -6 68856.3 2175.23 6
 0 32 -7 4570.99 537.797 4
 0 32 -7 3800.12 472.681 6
 0 32 -8 3912.24 499.764 6
 0 32 -8 4630.57 538.831 4
 0 32 -9 172902 3512.51 6
 0 32 -9 175536 3261.99 4
 0 32 -10 3338.16 539.212 6
 0 32 -10 5468.55 666.75 4
 0 32 -11 143271 3026.57 4
 0 32 -11 133202 2925.04 6
 0 32 -12 308.26 231.614 4
 0 32 -12 1168.29 364.746 6
 0 32 -13 972.761 224.063 4
 0 32 -14 2835.61 397.319 4
 0 -32 15 29018.1 1428.77 5
 0 32 -15 28301.2 1090.86 4
 0 -32 16 9855.81 771.705 5
 0 32 -16 10573.2 598 4
 0 34 0 379770 4916.95 6
 0 34 -1 6569.41 679.887 6
 0 34 1 4872.69 575.562 6
 0 34 2 35899.8 1458.03 6
 0 34 -2 44382.9 1726.93 6
 0 34 -3 36512.5 1577.53 6
 0 34 3 32555.7 1372.33 6
 0 34 -4 5206.05 570.05 6
 0 34 -5 56982.6 2015.46 6
 0 34 -6 14969 1027.57 6
 0 34 -7 4441.28 568.847 6
 0 34 -8 5464.55 637.795 6
 0 34 -8 7068.38 664.346 4
 0 34 -9 182383 3601.23 6
 0 34 -9 194623 3395.83 4
 0 34 -10 7471.74 762.637 4
 0 34 -10 5742.34 673.715 6
 0 34 -11 209674 3619.06 6
 0 34 -11 229114 3714.9 4
 0 34 -12 5738.62 594.085 4
 0 34 -13 20028.9 1018.46 4
 0 -34 14 12.8653 199.227 5
 0 34 -14 53.2837 126.874 4
 0 -34 15 2265.46 403.841 5
 0 36 0 391604 5121.03 6
 0 36 1 1582.9 353.47 6
 0 36 -1 1790.73 390.44 6
 0 36 2 192395 3484.41 6
 0 36 -2 245401 4151.61 6
 0 36 3 689.067 215.931 6
 0 36 -3 1037.67 202.793 6
 0 36 -4 43653.8 1761.92 6
 0 36 -5 15288.1 1045.13 6
 0 36 -6 24265.6 1328.22 6
 0 36 -7 294.811 192.903 6
 0 36 -8 8337.59 789.264 6
 0 36 -9 117229 2860.06 6
 0 36 -10 4947.64 628.99 6
 0 36 -11 143127 2901.67 6
 0 -36 13 13798.4 1003.97 5
 0 -36 14 170.815 186.754 5
 0 38 0 202645 3687.72 6
 0 38 1 12154 911.176 6
 0 38 -1 13303.5 995.778 6
 0 38 2 24742.8 1243.21 6
 0 38 -2 29404.3 1456.6 6
 0 38 -3 4689.24 591.794 6
 0 38 -4 51480.8 1938.11 6
 0 38 -5 28353.1 1436.84 6
 0 38 -6 8001.46 785.61 6
 0 38 -7 6346.48 683.885 6
 0 38 -8 2002.21 430.074 6
 0 38 -9 86375 2382.88 6
 0 38 -10 3106.59 500.934 6
 0 -38 11 81745.7 2319.97 5
 0 -38 12 1196.16 339.556 5
 0 40 0 324803 4644.78 6
 0 40 -1 1655.66 380.458 6
 0 40 1 1342.98 325.279 6
 0 40 -2 6362.26 679.398 6
 0 40 2 6986.48 656.46 6
 0 40 -3 15908.7 1062.84 6
 0 40 -4 75784.9 2333.34 6
 0 40 -5 38870 1661.21 6
 0 40 -6 22845.9 1272.52 6
 0 40 -7 4212.16 557.751 6
 0 40 -8 1874.94 423.375 6
 0 40 -9 49012.7 1716 6
 0 40 -10 1053.65 310.951 6
 0 42 0 24826.7 1244.42 6
 0 42 -1 522.73 255.31 6
 0 42 1 940.354 280.848 6
 0 42 2 7295.3 644.406 6
 0 42 -2 6993.64 697.071 6
 0 42 -3 12066.3 915.524 6
 0 42 -4 89156.4 2439.55 6
 0 42 -5 86682.3 2404.82 6
 0 42 -6 59829 1975.13 6
 0 42 -7 7330.58 692.153 6
 0 42 -8 1141.56 306.963 6
 0 42 -9 4926.02 539.317 6
 0 44 0 29282.2 1283.87 6
 0 44 -1 576.348 264.635 6
 0 44 1 638.511 244.98 6
 0 44 -2 3257.27 468.778 6
 0 44 -3 8285.9 737.96 6
 0 44 -4 83698.1 2270.9 6
 0 44 -5 75442.4 2133.55 6
 0 44 -6 52481.3 1738.98 6
 0 44 -7 49951.4 1651.92 6
 0 44 -8 1366.66 332.74 6
 0 46 0 50037 1569.61 6
 0 46 -1 1758.15 357.79 6
 0 46 -2 855.944 259.648 6
 0 46 -3 3196.14 446.515 6
 0 46 -4 60868.7 1804.47 6
 0 46 -5 50771.8 1638.25 6
 0 46 -6 44333.3 1486.54 6
 -1 1 -1 999999 2662.55 2
 -1 -1 -1 995712 1883.26 2
 1 1 2 10043.9 254.87 2
 1 1 -2 9695.19 333.403 1
 1 -1 2 9138.85 308.049 2
 1 1 3 82.9734 67.2043 1
 -1 -1 3 175.58 86.4072 1
 1 -1 -3 186.245 87.0626 1
 1 -1 3 137.661 54.7262 2
 1 1 -3 176.354 87.3649 1
 1 1 3 125.824 55.1123 2
 1 -1 4 19586 734.256 1
 1 -1 4 18760 591.317 2
 1 1 4 18319.7 512.401 2
 1 1 4 19000.1 741.77 1
 1 1 -4 18816.5 668.839 1
 -1 -1 4 20350.8 722.621 1
 1 1 5 44124.8 909.617 2
 1 -1 5 44500.9 1252.68 1
 1 -1 5 44652.8 1007.81 2
 1 1 5 44287 1256.51 1
 -1 -1 5 44948.9 1201.06 1
 1 1 6 12043 531.478 2
 1 1 6 11975.5 724.104 1
 1 -1 6 11422.2 570.199 2
 1 -1 6 11567.7 711.181 1
 1 -1 7 4637.12 395.585 2
 1 -1 7 4487.45 490.911 1
 1 1 7 4567.62 505.501 1
 1 1 7 4349.89 353.502 2
 1 1 8 167688 2385.27 2
 1 -1 8 166947 2549.87 2
 1 -1 8 169037 3285.64 1
 1 1 8 165111 3259.05 1
 1 1 9 26598.7 1025.97 2
 1 1 -9 27422.5 1037.49 3
 1 -1 9 26356 1099.6 2
 1 -1 -10 345954 3914.39 3
 -1 -1 -10 334899 3640.78 3
 1 1 -10 346262 3904 3
 -1 -1 10 322973 4227.05 2
 -1 1 -10 331395 3643.7 3
 1 -1 -11 457.839 235.675 3
 -1 1 -11 307.226 198.6 3
 -1 -1 -11 614.801 205.994 3
 1 1 -11 620.337 212.434 3
 1 -1 -12 160900 2970.04 3
 -1 1 -12 154326 2777.19 3
 1 1 -12 157598 2949.34 3
 -1 -1 -12 156930 2774.63 3
 -1 1 -13 4336.16 502.92 3
 1 1 -13 4397.21 539.952 3
 1 -1 -13 4548.37 543.112 3
 -1 -1 -13 4207.18 491.253 3
 1 -1 -14 4487.11 565.099 3
 -1 1 -14 4243.04 521.935 3
 -1 -1 -14 4021.57 506.309 3
 1 1 -14 4264.37 557.601 3
 -1 1 -15 -121.348 209.231 3
 1 1 -15 212.281 176.333 3
 -1 -1 -15 18.0794 171.581 3
 1 -1 -15 69.4227 183.272 3
 -1 1 -16 -68.2116 217.476 3
 1 -1 -16 138.749 161.818 3
 1 1 -16 -648.155 363.614 3
 -1 -1 -16 -124.973 233.725 3
 -1 -1 -17 5215.9 579.477 3
 1 1 -17 4918.09 584.965 3
 -1 1 -17 5206.54 588.047 3
 1 -1 -17 4939.91 591.781 3
 -1 1 -18 10133.6 796.291 3
 -1 -1 -18 9095.64 737.984 3
 1 1 -18 9716.14 810.304 3
 1 -1 -18 9308.85 797.561 3
 -1 -1 -19 39126.6 1421.12 3
 1 1 -19 38826 1498.9 3
 -1 1 -19 38317.5 1431.55 3
 1 -1 -19 37614.4 1449.66 3
 1 -1 -20 2476.76 353.379 3
 1 1 -20 2587.35 381.117 3
 -1 1 -21 48919.1 1359.65 4
 1 1 -21 51635.5 1391.41 4
 1 -3 0 100.995 35.897 2
 -1 3 0 101.71 36.6213 2
 -1 3 1 600371 2212.19 2
 1 -3 -1 614704 2347.32 2
 -1 3 -1 594996 2476.45 2
 1 3 1 620680 2265.3 1
 -1 -3 1 634459 1600.57 1
 1 -3 2 11339.7 386.934 2
 -1 -3 2 12152.1 355.422 1
 1 3 2 10877.1 396.673 1
 1 3 3 12532 275.633 2
 1 3 3 12241.2 515.956 1
 1 3 4 28480.6 528.638 2
 1 3 4 28121.2 902.894 1
 -1 -3 4 27679.8 830.024 1
 1 -3 4 27345.1 776.508 2
 -1 -3 5 161260 2254.56 1
 1 -3 5 156954 2322.25 1
 1 3 5 165033 2462.7 1
 1 3 5 161420 1497.59 2
 1 -3 5 158801 2055.36 2
 -1 -3 6 113363 2103.27 1
 1 -3 6 112688 1904.52 2
 1 3 6 119865 2348.27 1
 1 -3 6 111211 2178.76 1
 1 3 6 117984 1472.49 2
 1 -3 -6 112687 2159.48 1
 1 -3 7 1040.27 209.852 2
 1 3 7 999.936 257.682 1
 1 -3 7 1118.31 247.534 1
 -1 -3 7 994.245 221.666 1
 1 3 7 1219.05 175.413 2
 1 3 8 115388 2724.9 1
 1 -3 8 109241 2168.49 2
 1 -3 8 110528 2617.19 1
 1 3 8 119117 1809.9 2
 1 3 -9 29744.5 1090.66 3
 1 -3 9 29365.5 1245.26 2
 -1 3 -9 27930.8 998.982 3
 1 3 9 29481.1 997.212 2
 1 -3 10 204110 3411.35 2
 -1 -3 -10 205722 2844.23 3
 -1 -3 10 201296 3534.03 2
 -1 3 -10 208612 2891.36 3
 1 3 -10 210224 3045.02 3
 -1 3 -11 803.928 222.063 3
 1 -3 -11 607.642 163.254 3
 -1 -3 -11 799.917 217.41 3
 1 3 -11 863.296 248.597 3
 -1 3 -12 45806.8 1529.64 3
 1 3 -12 47175 1617.78 3
 1 -3 -12 47948.7 1630.93 3
 -1 -3 -12 45145 1494.57 3
 -1 -3 -13 499.567 179.1 3
 1 3 -13 786.493 306.685 3
 1 -3 -13 722.74 268.153 3
 -1 3 -13 969.066 281.277 3
 -1 3 -14 3313 471.717 3
 1 3 -14 3465.82 509.607 3
 -1 -3 -14 2925.47 421.891 3
 1 -3 -14 2928.37 452.926 3
 1 -3 -15 5652.61 632.755 3
 -1 3 -15 5675.33 606.743 3
 1 3 -15 6090.87 665.206 3
 -1 -3 -15 5653.47 599.729 3
 1 3 -16 7913.96 747.099 3
 -1 3 -16 8922.65 779.814 3
 1 -3 -16 9257.95 816.537 3
 -1 -3 -16 9400.96 767.497 3
 -1 3 -17 1802.57 370.77 3
 -1 -3 -17 1484.64 312.045 3
 1 3 -17 2005.63 395.657 3
 1 -3 -17 1493.13 334.349 3
 1 -3 -18 2560.23 411.181 3
 1 3 -18 3462.27 494.775 3
 -1 3 -18 3390.66 479.989 3
 -1 -3 -18 3080.24 437.66 3
 -1 3 -19 41782 1515.55 3
 1 3 -19 41671.6 1580.02 3
 1 -3 -19 42955 1522.2 3
 -1 -3 -19 42039.4 1427.73 3
 1 -3 -20 4238.84 452.014 3
 1 3 -20 4466.28 506.053 3
 1 3 -21 29683.8 1044.65 4
 -1 3 -21 30723.4 1048.91 4
 -1 5 0 278.201 65.5493 2
 1 -5 0 278.91 68.6038 2
 -1 5 1 56635.1 676.114 2
 -1 5 -1 57280.8 911.33 2
 1 -5 -1 59408.4 761.73 2
 -1 -5 -1 60367.9 745.624 1
 1 5 2 7799.63 348.645 1
 -1 -5 -2 7688.5 350.625 1
 -1 5 2 7749.02 264.102 2
 1 5 3 6610.41 387.412 1
 -1 5 3 6616.28 279.159 2
 1 -5 4 63624.3 1287.05 2
 1 5 4 63321.1 1369.05 1
 -1 -5 5 102991 1771.73 1
 1 5 5 103016 1962.35 1
 1 -5 5 102477 1773.17 2
 1 5 5 107321 988.406 2
 1 -5 6 81840 1726.46 2
 1 -5 6 82109.4 1867.2 1
 1 -5 -6 82063.7 1899.88 1
 1 5 6 86629.3 1978.5 1
 -1 -5 6 82741.9 1779.84 1
 1 -5 7 3736.71 408.722 2
 1 5 7 4662.53 289.729 2
 -1 -5 7 3852.58 426.664 1
 1 -5 7 3886.46 448.457 1
 1 -5 8 28453.1 1171.08 2
 1 -5 8 29017.7 1338.59 1
 1 -5 9 25405.1 1215.78 2
 1 5 -9 25802.7 1016.69 3
 -1 5 -9 26078.8 986.781 3
 -1 -5 -10 135614 2321.31 3
 1 5 -10 137302 2478.44 3
 -1 5 -10 133268 2338.85 3
 1 5 -11 440.941 196.997 3
 1 -5 -11 441.428 150.795 3
 -1 5 -11 198.943 139.62 3
 -1 -5 -11 354.492 142.443 3
 -1 5 -12 3716 457.728 3
 1 5 -12 3347.6 442.441 3
 1 -5 -12 3274.24 435.564 3
 -1 -5 -12 3996.91 459.782 3
 1 -5 -13 2352.03 381.19 3
 -1 -5 -13 2029.52 351.777 3
 -1 5 -13 1504.43 285.906 3
 1 5 -13 1943.96 383.247 3
 1 -5 -14 41288.2 1624.12 3
 -1 5 -14 44018.8 1654.85 3
 1 -5 -15 31674.4 1450.05 3
 -1 -5 -15 32395.6 1390.31 3
 -1 5 -15 31556.7 1448.34 3
 1 5 -15 31705.2 1494.46 3
 1 5 -16 50987.6 1917.86 3
 -1 -5 -16 56028.5 1828.55 3
 -1 5 -16 53897.4 1912.46 3
 1 -5 -16 54680.5 1916.92 3
 -1 -5 -17 18191.7 1037.67 3
 1 5 -17 19227.8 1178.52 3
 -1 5 -17 20191.9 1164.96 3
 1 -5 -17 18017.3 1093.62 3
 1 -5 -18 1226.23 286.293 3
 1 5 -18 1354.24 341.124 3
 -1 -5 -18 1121.96 268.942 3
 -1 5 -18 1281.85 315.372 3
 1 5 -19 36201.8 1473.18 3
 -1 -5 -19 36105.4 1286.8 3
 -1 5 -19 34668.3 1405.5 3
 1 -5 -19 32570.5 1293.32 3
 -1 5 -20 739.602 253.041 4
 1 -5 -20 1150.58 237.346 3
 1 5 -20 1126.46 284.608 3
 1 5 -20 1177.34 271.548 4
 -1 5 -21 18476.1 815.033 4
 1 5 -21 18735.9 811.804 4
 1 -7 0 94.8468 80.0186 2
 -1 7 0 -3.571 58.2198 2
 -1 7 1 2086.89 166.032 2
 -1 -7 -1 1943.48 152.087 1
 1 -7 1 1806.32 187.123 2
 1 -7 -1 2100.66 168.065 2
 1 -7 -2 5704.48 287.803 2
 -1 -7 -2 4854.38 142.428 2
 -1 -7 -2 5439.99 308.177 1
 -1 7 2 5521.97 232.031 2
 -1 -7 -3 89430.9 1448.57 1
 -1 7 3 92572.6 922.219 2
 -1 -7 -4 1208.31 208.817 1
 -1 7 4 1270.34 139.48 2
 1 -7 -4 1007.62 200.001 1
 -1 -7 4 895.229 159.333 1
 -1 -7 5 161424 2168.3 1
 1 -7 5 162616 2394.55 2
 1 -7 -5 162009 2513.77 1
 1 -7 6 137699 2362.5 2
 1 -7 -6 137196 2535.5 1
 -1 -7 6 138393 2283.55 1
 1 -7 6 135008 2428.1 1
 1 -7 7 33888.6 1257.67 2
 -1 -7 7 33372.9 1246.47 1
 1 -7 -7 33852.6 1361.26 1
 1 7 7 36057 534.661 2
 1 -7 7 32479.9 1317.08 1
 1 7 8 8646.46 306.848 2
 1 -7 8 9244.16 708.031 2
 -1 -7 8 8495.34 702.645 1
 1 -7 8 8378.48 746.585 1
 1 -7 9 871.067 257.766 2
 -1 7 -9 418.831 109.953 3
 1 7 -9 679.721 188.736 3
 -1 7 -10 88823.4 1936.72 3
 -1 -7 -10 89966.8 1889.71 3
 1 7 -10 89264.5 2015.31 3
 -1 -7 -11 357.082 192.993 3
 1 -7 -11 350.871 184.68 3
 1 7 -11 498.388 242.113 3
 -1 7 -11 227.302 160.316 3
 -1 7 -12 3232.52 393.242 3
 1 -7 -12 3939.11 472.228 3
 -1 -7 -12 4076.72 458.446 3
 1 7 -12 4284.88 510.485 3
 1 7 -13 3978.2 522.448 3
 1 -7 -13 4659.27 544.305 3
 -1 7 -13 3124.04 437.443 3
 -1 -7 -13 4296.44 495.339 3
 1 7 -14 111986 2750.66 3
 -1 7 -14 113519 2656.07 3
 -1 -7 -14 109811 2459.64 3
 1 7 -15 76702 2341.44 3
 -1 7 -15 77224 2277.27 3
 1 -7 -15 78718.4 2250.58 3
 -1 -7 -15 78869.8 2124.81 3
 1 -7 -16 120727 2811.46 3
 -1 -7 -16 124471 2653.36 3
 -1 7 -16 121888 2893.32 3
 1 7 -16 118894 2926.27 3
 1 -7 -17 23597.1 1209.1 3
 1 -7 17 24982.1 1383.02 5
 1 7 -17 24723.2 1333.46 3
 -1 7 -17 24769.8 1300.42 3
 -1 -7 -17 23513.3 1150.16 3
 -1 7 -18 1307.81 345.659 3
 1 7 -18 1000.96 310.486 3
 -1 -7 -18 1080.9 245.721 3
 1 -7 -18 1249.92 294.525 3
 -1 7 -19 5179.64 552.462 3
 1 -7 -19 4744.48 484.512 3
 1 7 -19 4894.87 551.083 3
 1 7 -20 808.083 200.79 4
 -1 7 -20 448.81 212.727 4
 1 -9 0 1144.29 178.118 2
 -1 -9 -1 5650.89 270.248 2
 -1 9 1 5274.72 288.748 2
 1 -9 1 6506.97 384.288 2
 1 -9 -1 6353.49 316.952 2
 -1 -9 -1 6174.5 288.662 1
 -1 -9 -2 9047.53 421.432 1
 1 -9 -2 9212.3 405.543 2
 -1 -9 -2 9577.14 276.276 2
 -1 9 2 9073.2 350.237 2
 -1 -9 -3 298288 2768.59 1
 -1 9 3 313622 1876.54 2
 1 -9 -4 244785 2928.29 1
 -1 -9 -4 239148 2775.84 1
 -1 -9 4 244085 2322.28 1
 1 -9 5 202177 2821.14 2
 -1 -9 5 207615 2454.05 1
 1 -9 -5 207292 2941.43 1
 1 -9 -6 244399 3479.55 1
 1 -9 6 247804 3332.11 2
 -1 -9 6 243652 2995.94 1
 1 -9 7 108542 2377.15 2
 1 -9 -7 109969 2528.5 1
 1 -9 7 106231 2399.2 1
 -1 -9 7 110444 2274.32 1
 1 -9 8 100531 2461.14 2
 1 -9 8 98466 2517.5 1
 -1 -9 8 95296.3 2322.41 1
 -1 9 -8 101536 1889.72 3
 1 9 -9 2719.95 349.825 3
 -1 9 -9 2883.39 352.469 3
 -1 -9 -10 62783.1 1581.49 3
 1 9 -10 61304 1678.26 3
 -1 9 -10 61516.8 1644.05 3
 -1 9 -11 64.138 137.906 3
 1 9 -11 507.517 207.008 3
 -1 -9 -11 292.294 152.368 3
 -1 9 -12 10.4481 184.595 3
 1 9 -12 489.52 227.476 3
 -1 -9 -12 237.31 156.61 3
 1 -9 -12 206.73 156.747 3
 -1 9 -13 7653.82 687.256 3
 1 -9 -13 8996.71 729.085 3
 1 9 -13 8174.14 731.833 3
 -1 -9 -13 8858.06 675.719 3
 1 -9 -14 123374 2754.07 3
 -1 9 -14 124560 2836.03 3
 -1 -9 -14 125013 2588.83 3
 1 9 -14 123354 2870.7 3
 1 9 -15 75016.6 2310.06 3
 -1 9 -15 74111.8 2250.15 3
 -1 -9 -15 72630.6 2009.42 3
 1 -9 -15 71376.3 2124.15 3
 1 9 -16 84602.1 2490.96 3
 1 -9 -16 85087 2299.66 3
 -1 -9 -16 86264.5 2169.66 3
 -1 9 -16 84658.9 2424.64 3
 -1 9 -17 19249.7 1149.97 3
 1 9 -17 18197.7 1129.97 3
 1 -9 -17 17799.8 1026.01 3
 -1 -9 -17 19016.3 1015.6 3
 1 -9 18 1827.9 389.14 5
 1 -9 -18 1655.36 306.041 3
 1 9 -18 1540.03 341.998 3
 -1 9 -18 1645.37 354.078 3
 1 9 -19 -47.782 142.714 3
 -1 9 -19 24.8383 145.018 4
 1 9 -19 -133.675 169.868 4
 -1 9 -20 -186.863 133.022 4
 1 9 -20 -152.389 155.458 4
 1 -11 0 416.804 141.831 2
 1 -11 1 84838.5 1496.51 2
 -1 -11 -1 81953.7 1133.56 1
 1 -11 -1 84449.1 1260.71 2
 -1 -11 -1 81304.3 1167.79 2
 -1 11 2 2452.26 207.246 2
 1 -11 -2 2851.65 242.193 2
 -1 -11 -2 2879.33 252.897 1
 -1 -11 -2 2991.81 191.726 2
 1 -11 2 3126.05 319.894 2
 -1 -11 -3 8392.88 488.956 1
 1 -11 3 9342.17 572.502 2
 -1 11 3 8368.22 344.473 2
 1 -11 -4 29322.5 1060.91 1
 1 -11 4 30733.6 1089.27 2
 -1 -11 4 30659.5 818.476 1
 -1 -11 -4 30093.6 1021.39 1
 1 -11 5 217595 3088.72 2
 1 -11 -5 215250 3084.96 1
 -1 -11 -5 212488 2963.15 1
 -1 -11 5 218066 2501.92 1
 1 -11 6 265799 3656.76 2
 -1 -11 6 258956 3066.89 1
 1 -11 -6 257753 3666.46 1
 1 -11 7 140492 2804.29 1
 1 -11 7 139391 2853.31 2
 -1 -11 7 142007 2567.87 1
 1 -11 -7 141963 2947 1
 1 11 -8 26599 999.549 3
 -1 -11 8 25361.9 1190.09 1
 1 -11 8 24184.3 1268.52 1
 -1 11 -8 26783.7 988.602 3
 -1 11 -9 1402.92 270.244 3
 1 11 -9 1252.17 276.251 3
 -1 -11 -10 50040.2 1411.14 3
 1 11 -10 49205.2 1528.79 3
 -1 11 -10 49511.3 1502.84 3
 -1 -11 -11 338.878 151.866 3
 1 11 -11 399.621 159.798 3
 -1 11 -11 401.15 201.264 3
 -1 -11 -12 814.532 195.633 3
 -1 11 -12 509.334 206.532 3
 1 11 -12 409.002 187.564 3
 1 -11 -12 676.405 229.051 3
 1 -11 -13 4261.6 495.723 3
 -1 11 -13 3973.12 504.49 3
 -1 -11 -13 5091.15 511.129 3
 1 11 -13 4651.69 552.756 3
 1 -11 -14 75095.4 2127.07 3
 1 11 -14 75247 2259.37 3
 -1 -11 -14 78719.2 2028.73 3
 -1 11 -14 75767.6 2219.46 3
 -1 11 -15 35446.8 1551.38 3
 1 11 -15 35111.5 1587.82 3
 -1 -11 -15 37319.5 1410.48 3
 1 -11 -15 34987.2 1470.53 3
 -1 11 -16 45391.9 1779.57 3
 1 11 -16 43792.2 1776.62 3
 1 -11 -16 43778.1 1610.96 3
 1 11 -17 24446.3 1313.81 3
 1 -11 -17 24921.1 1182.83 3
 -1 11 -17 24100.7 1291.84 3
 1 11 -18 194.868 172.286 3
 -1 11 -18 -9.49304 148.353 4
 -1 11 -18 300.341 230.031 3
 1 11 -18 241.655 141.319 4
 1 -11 18 307.636 252.177 5
 1 11 -19 73.3801 157.634 3
 1 11 -19 0.25529 125.332 4
 -1 11 -19 193.561 143.289 4
 1 11 -20 -277.324 147.425 4
 -1 11 -20 -178.788 155.807 4
 1 -13 0 -44.8453 79.2736 2
 -1 -13 0 34.1818 80.284 2
 1 -13 1 208269 2559.78 2
 -1 -13 -1 210854 2112.04 2
 1 -13 -1 201995 2153.38 2
 -1 -13 -1 201593 1907.44 1
 -1 -13 1 206546 2560.77 2
 1 -13 -2 2146.69 233.953 2
 1 -13 2 1589.92 257.178 2
 -1 -13 -2 1974.66 179.087 2
 -1 -13 -2 1591.68 200.796 1
 -1 -13 -3 60594.3 806.656 2
 -1 -13 -3 61100.2 1365.1 1
 -1 -13 4 29513.3 805.012 1
 1 -13 -4 30761.8 1139.59 1
 -1 -13 -4 29884 1055.89 1
 1 -13 4 30113.4 1165.01 2
 -1 -13 -5 126594 2363.17 1
 1 -13 -5 124458 2438.72 1
 -1 -13 5 130175 1928.35 1
 1 -13 5 130911 2569.45 2
 1 -13 6 344196 4465.34 2
 -1 -13 6 335621 3484.21 1
 1 -13 7 61901 1892.56 1
 -1 -13 7 63401.5 1706.7 1
 1 -13 -7 61114.7 1994.69 1
 -1 13 -8 6355.21 507.885 3
 1 13 -8 6168.85 491.691 3
 1 -13 8 6059.76 640.829 1
 -1 -13 8 6369.78 594.457 1
 -1 13 -9 13767.5 769.207 3
 1 13 -9 14449.7 798.476 3
 1 13 -10 130283 2500.59 3
 -1 13 -10 128965 2440.37 3
 -1 13 -11 431.202 191.716 3
 1 13 -11 304.709 147.307 3
 -1 13 -12 6632.07 628.056 3
 1 13 -12 6950.55 648.39 3
 1 -13 -12 7067.9 630.974 3
 1 -13 -13 1197.16 280.43 3
 -1 13 -13 984.901 275.454 3
 1 13 -13 1172.94 320.664 3
 1 -13 -14 9535.43 735.315 3
 1 13 -14 9037.57 805.153 3
 -1 13 -14 8001.4 726.277 3
 1 13 -15 17237 1121.52 3
 -1 13 -15 17334.8 1108.08 3
 1 -13 -15 18860.4 1060.54 3
 1 13 -16 27068.7 1393.47 3
 1 13 -16 26616.3 1280.95 4
 -1 13 -16 28033 1396.23 3
 -1 13 -16 25354.4 1262.32 4
 1 -13 -16 27928.8 1271.64 3
 -1 13 -17 3725.09 460.513 4
 -1 13 -17 3789.35 513.304 3
 1 13 -17 3233.83 433.335 4
 1 13 -17 3731.73 524.446 3
 1 -13 18 517.083 249.929 5
 1 13 -18 236.075 121.619 4
 1 13 -18 278.274 217.906 3
 -1 13 -18 341.269 191.242 4
 -1 13 -19 5993.45 534.029 4
 1 13 -19 6651.65 558.186 4
 -1 -13 19 6899.99 693.939 5
 1 -13 19 7065.67 687.098 5
 -1 13 -20 413.324 138.32 4
 1 13 -20 68.9818 108.797 4
 -1 -15 0 325.489 139.646 2
 1 -15 0 248.11 84.4544 2
 -1 -15 -1 238932 2211.79 1
 1 -15 -1 243844 2567.21 2
 -1 -15 -1 247966 2552.07 2
 1 -15 1 241177 2996.21 2
 -1 -15 1 242407 2990.05 2
 1 -15 -2 341.352 136.65 2
 -1 -15 -2 268.398 93.0968 2
 -1 -15 -2 304.143 99.7154 1
 1 -15 2 568.007 200.406 2
 -1 -15 2 160.096 101.108 2
 -1 -15 -3 58.6194 85.9292 1
 -1 -15 -3 263.462 79.2665 2
 1 -15 3 117.525 142.139 2
 1 -15 -3 139.868 106.68 2
 -1 -15 3 119.056 110.41 2
 1 -15 4 11699.3 770.479 2
 -1 -15 4 11067.3 490.9 1
 -1 -15 4 12514.2 803.18 2
 -1 -15 -4 10585.7 650.697 1
 1 -15 -4 11089.8 718.192 1
 1 -15 5 80694.5 2169.68 2
 -1 -15 -5 77916.1 1911.55 1
 1 -15 -5 78737.3 2022.82 1
 -1 -15 5 80782 2194.86 2
 -1 -15 5 81933.1 1518.72 1
 1 -15 6 29408.2 1387.33 2
 1 -15 -6 25173.7 1233.68 1
 -1 -15 6 29501.6 1412.87 2
 -1 -15 6 28989.6 1014.26 1
 -1 15 -7 7027.45 510.758 3
 1 15 -7 6212.82 449.761 4
 1 15 -7 6709.4 495.136 3
 -1 15 -7 6222.85 460.193 4
 1 -15 7 5854.15 600.049 1
 -1 -15 7 6432.2 544.585 1
 -1 15 -8 48531 1400.23 3
 1 15 -8 48459.8 1393.32 3
 -1 15 -8 47363.8 1320.61 6
 1 15 -8 44914.8 1277.96 6
 -1 15 -9 6952.63 526.324 6
 1 15 -9 7222.35 535.843 6
 1 15 -9 6679.33 557.845 3
 -1 15 -9 7364.07 583.125 3
 -1 15 -10 166286 2876.3 3
 1 15 -10 167605 2896.73 3
 1 15 -11 327.596 197.79 3
 -1 15 -11 643.491 261.84 3
 -1 15 -12 20152.4 1098.76 3
 1 15 -12 20264.9 1129.55 3
 1 -15 -12 21485.7 1085.69 3
 1 -15 -13 1066.34 291.545 3
 1 15 -13 446.566 209.336 3
 -1 15 -13 361.787 216.857 3
 1 15 -14 4602.61 590.166 3
 -1 15 -14 4803.27 582.795 4
 1 -15 -14 5023.88 551.194 3
 1 15 -14 4223.73 534.046 4
 -1 15 -14 4077.2 537.44 3
 -1 15 -15 11953.7 884.538 4
 1 15 -15 12120.7 881.534 4
 -1 15 -15 11141.9 891.141 3
 1 15 -15 12691.4 959.4 3
 -1 15 -16 10600 872.135 3
 1 15 -16 8851.76 729.789 4
 -1 15 -16 8428.38 716.861 4
 1 15 -16 10035.7 855.538 3
 1 15 -17 16.5075 182.498 4
 -1 15 -17 -213.813 234.686 4
 1 15 -17 290.452 200.311 3
 1 15 -18 3647.77 438.749 4
 1 -15 18 4448.47 589.481 5
 -1 15 -18 4118.56 457.611 4
 1 -15 19 34163.5 1465.93 5
 -1 15 -19 34638.5 1237.9 4
 1 15 -19 34777.2 1247.04 4
 -1 -15 19 34605.5 1469.76 5
 -1 15 -20 3722.98 378.821 4
 1 15 -20 3582.41 370.667 4
 1 -17 0 441.104 157.804 2
 -1 -17 0 501.207 159.1 2
 -1 -17 1 139166 2446.9 2
 1 -17 -1 143144 2133.48 2
 -1 -17 -1 140193 2062.97 2
 1 -17 1 138325 2389.51 2
 -1 -17 -1 139600 1802.2 1
 -1 -17 -2 11905.9 586.128 1
 1 -17 2 13454 811.851 2
 -1 -17 2 12930.3 788.8 2
 1 -17 -2 13367.1 645.295 2
 -1 -17 -2 12909.5 543.181 2
 1 -17 -3 320.513 111.526 1
 -1 -17 -3 633.338 113.531 2
 -1 -17 3 115.95 112.042 2
 -1 -17 -3 576.916 159.694 1
 1 -17 -3 593.634 145.555 2
 1 -17 3 850.021 238.65 2
 1 -17 4 4056.49 485.128 2
 -1 -17 -4 2980.01 361.537 1
 1 -17 -4 2935.44 397.231 1
 -1 -17 4 3889 284.496 1
 -1 -17 4 3909.96 495.219 2
 -1 -17 5 885.145 158.554 1
 1 -17 -5 1154.08 274.619 1
 -1 -17 5 902.385 264.314 2
 -1 -17 -5 1040.92 251.757 1
 1 -17 5 960.981 289.125 2
 1 17 -6 2152.26 263.621 4
 1 -17 -6 2647.57 437.201 1
 -1 17 -6 2619.12 313.442 3
 -1 17 -6 2318.78 311.412 6
 -1 17 -6 2365.4 276.334 4
 1 17 -6 2138.94 281.21 6
 1 17 -7 1480.89 228.723 4
 -1 17 -7 1652.7 268.103 3
 -1 17 -7 1939.16 299.821 6
 -1 17 -7 1532.88 235.911 4
 1 17 -7 1679.12 263.229 6
 1 17 -7 1868.19 287.749 3
 1 17 -8 85349.4 1798.36 4
 -1 17 -8 87928.3 1860.58 4
 1 17 -8 83142.4 1838.72 6
 -1 17 -8 94571 1987.97 3
 1 17 -8 92055.5 1971.72 3
 -1 17 -8 87550.8 1890.53 6
 1 17 -9 18223.7 882.146 6
 1 17 -9 19265.9 922.444 4
 -1 17 -9 18800.5 923.623 4
 -1 17 -9 19453.5 956.478 3
 1 17 -9 19843.4 987.965 3
 -1 17 -9 17578 872.737 6
 -1 17 -10 244651 3517.97 4
 -1 17 -10 232590 3445.3 3
 -1 17 -10 239333 3293.18 6
 1 17 -10 233940 3510.86 3
 1 17 -10 235874 3232.85 6
 1 17 -10 237034 3426.67 4
 -1 17 -11 131.934 224.851 3
 1 17 -11 115.597 204.957 3
 1 17 -11 334.801 213.011 4
 -1 17 -11 537.554 258.352 4
 1 17 -12 36335 1531.47 3
 1 17 -12 35557.1 1474.46 4
 -1 17 -12 38311.4 1545.54 4
 -1 17 -12 35120 1497.8 3
 1 17 -13 1066.78 303.137 4
 1 17 -13 1264.25 341.872 3
 -1 17 -13 1359.52 353.566 3
 -1 17 -13 1082.8 286.771 4
 -1 17 -14 7327.59 737.026 3
 -1 17 -14 7962.89 742.946 4
 1 17 -14 7743.9 719.826 4
 1 17 -14 7670.25 751.279 3
 -1 17 -15 7598.3 750.262 3
 1 17 -15 7745.41 706.149 4
 1 17 -15 7356.33 739.911 3
 -1 17 -15 7562.72 694.945 4
 1 17 -16 4190.86 504.786 4
 1 17 -16 4560.8 594.747 3
 -1 17 -16 4408.66 515.318 4
 -1 17 -17 28.5918 140.587 4
 1 17 -17 -164.148 194.609 4
 1 -17 18 7969.44 757.872 5
 1 17 -18 8505.13 654.608 4
 -1 17 -18 8026.88 635.817 4
 -1 17 -19 66796.8 1673.87 4
 -1 -17 19 66029.8 1962.33 5
 1 -17 19 63606.8 1940.7 5
 1 17 -19 66519.5 1672.04 4
 -1 -19 0 227.757 95.9163 1
 -1 -19 0 411.942 174.032 2
 1 -19 0 272.125 139.937 2
 -1 -19 -1 109171 1939.49 2
 1 -19 1 110339 2281.83 2
 1 -19 -1 111436 2016.51 2
 -1 -19 -1 107051 1617.24 1
 -1 -19 -2 190.164 75.4529 2
 -1 -19 2 446.822 192.93 2
 1 -19 2 369.749 205.948 2
 1 -19 -2 399.93 154.422 2
 -1 -19 -2 299.397 128.798 1
 -1 -19 -3 9590.22 460.103 2
 1 -19 3 11347.8 839.933 2
 1 -19 -3 9382.28 588.115 2
 -1 -19 3 10141.5 786.914 2
 -1 -19 -3 9389.05 609.668 1
 1 -19 -3 10156.3 719.174 1
 -1 -19 4 1860.49 348.878 2
 1 -19 -4 2167.27 370.66 1
 1 19 -4 1733.58 245.202 4
 -1 19 -4 1720.65 242.478 4
 -1 19 -4 1825.99 272.932 6
 1 19 -4 1811.13 271.928 6
 -1 -19 -4 1845.55 292.558 1
 1 19 -5 15638.6 726.601 4
 -1 19 -5 15911.5 788.507 6
 1 -19 -5 16294.2 1020.39 1
 1 19 -5 15867.3 791.525 6
 -1 19 -5 16367.1 746.48 4
 1 19 -6 21600.1 947.643 6
 1 19 -6 22223.7 896.319 4
 1 19 -6 23535.8 926.497 3
 -1 19 -6 22568.5 956.726 6
 -1 19 -6 23315 922.53 4
 -1 19 -7 3474.02 365.213 4
 -1 19 -7 3999.11 420.837 3
 1 19 -7 3533.66 400.448 6
 1 19 -7 4077.04 414.659 3
 1 19 -7 3481.74 362.968 4
 -1 19 -7 3938.49 430.199 6
 -1 19 -8 73986.5 1809.26 3
 -1 19 -8 70203 1774.07 6
 -1 19 -8 68258.4 1696.45 4
 1 19 -8 66392.5 1728.02 6
 1 19 -8 73236.9 1823.92 3
 1 19 -8 66460.9 1646.55 4
 -1 19 -9 9176.62 687.598 3
 -1 19 -9 9335.13 681.307 4
 1 19 -9 8672.92 646.749 4
 1 19 -9 9859.56 716.235 3
 -1 19 -9 8198.88 625.446 6
 1 19 -9 8647.71 670.427 6
 -1 19 -10 169536 2849.08 6
 -1 19 -10 169584 3007.08 3
 1 19 -10 168506 2952.68 4
 1 19 -10 177091 3110.02 3
 1 19 -10 169723 2861.34 6
 -1 19 -10 172771 3013.41 4
 1 19 -11 621.672 263.455 3
 1 19 -11 560.44 219.204 4
 -1 19 -11 895.495 292.923 6
 -1 19 -11 647.312 292.323 3
 -1 19 -11 548.736 230.937 4
 -1 19 -12 30068.3 1387.58 4
 1 19 -12 29667.8 1412.88 3
 1 19 -12 28679.1 1345.57 4
 -1 19 -12 28726.8 1357.95 3
 -1 19 -13 660.803 286.667 3
 1 19 -13 653.851 290.34 3
 -1 19 -13 482.62 184.976 4
 1 19 -13 559.174 267.019 4
 -1 19 -14 4296.23 537.407 4
 1 19 -14 4723.67 570.001 4
 1 19 -14 4573.44 578.923 3
 1 19 -15 7072.03 673.893 4
 -1 19 -15 6802.31 669.82 4
 1 19 -15 6813.86 710.583 3
 1 19 -16 12104.9 852.285 4
 -1 19 -16 12512.5 868.694 4
 1 19 -17 -26.6915 155.242 4
 -1 19 -17 -27.2521 165.997 4
 1 19 -18 5350.05 499.803 4
 1 -19 18 5703.85 642.444 5
 -1 19 -18 5461.49 509.924 4
 1 -19 19 48564.5 1628.07 5
 -1 19 -19 50964.1 1399.38 4
 1 19 -19 50934.9 1394.99 4
 -1 -19 19 48013.4 1617.09 5
 -1 -21 0 472.519 197.279 2
 1 -21 0 291.839 180.488 2
 1 -21 1 171123 3021.6 2
 -1 -21 -1 166589 2091.09 1
 -1 21 -1 169144 2312.89 4
 -1 -21 -1 172923 2564.99 2
 1 -21 -1 170367 2668.73 2
 1 -21 2 321.812 160.054 2
 1 21 -2 261.396 113.905 6
 -1 -21 2 92.5168 142.59 2
 -1 21 -2 231.996 104.315 4
 -1 -21 -2 174.861 110.955 1
 -1 -21 -2 197.306 91.3982 2
 1 21 -2 270.602 107.063 4
 -1 21 -2 371.032 137.635 6
 1 -21 -2 258.685 130.594 2
 -1 -21 -3 65306.1 1633.94 1
 -1 21 -3 65109.5 1461.49 4
 1 -21 -3 69485 1992.22 1
 -1 -21 3 68590.3 2201.63 2
 1 21 -3 64959.6 1625.4 6
 -1 21 -3 66716.3 1633.38 6
 1 21 -3 66970.7 1494.78 4
 -1 21 -4 21705.8 944.403 6
 -1 21 -4 20334.1 851.357 4
 -1 -21 -4 18466.5 956.029 1
 1 21 -4 19666.6 838.826 4
 1 -21 -4 18713.7 1086.77 1
 1 21 -4 20819.9 935.428 6
 1 21 -5 20802.1 875.18 4
 -1 21 -5 21203.6 894.748 4
 1 -21 -5 21315 1230.15 1
 -1 21 -5 21327.6 961.815 6
 1 21 -5 20477.5 944.944 6
 1 21 -6 38137.1 1314.33 6
 -1 21 -6 40051.7 1336.62 6
 1 21 -6 37186.3 1197.9 4
 -1 21 -6 38003.4 1231.1 4
 1 21 -7 11965.6 715.909 3
 1 21 -7 10501.7 653.826 4
 -1 21 -7 10796.7 675.842 4
 -1 21 -7 9923.31 683.178 6
 1 21 -7 10619.9 729.894 6
 1 21 -8 11074.5 707.971 4
 1 21 -8 10516.9 734.012 6
 -1 21 -8 11135.7 731.354 4
 -1 21 -8 10728.8 716.242 6
 1 21 -8 11724.8 754.971 3
 -1 21 -9 1938.36 313.685 6
 1 21 -9 2552.32 376.262 4
 -1 21 -9 2718.11 379.481 4
 1 21 -9 2890.57 419.034 6
 1 21 -9 2909.54 419.8 3
 1 21 -10 56094.8 1806.52 3
 -1 21 -10 55784.2 1775 4
 1 21 -10 55040.1 1745.8 4
 -1 21 -10 53191.7 1663.62 6
 1 21 -10 53315.2 1688.54 6
 -1 21 -11 908.567 274.627 4
 1 21 -11 1817.09 414.441 3
 1 21 -11 1030.93 307.43 4
 -1 21 -11 1252.89 315.137 6
 1 21 -11 864.211 252.917 6
 -1 21 -12 14092 972.688 4
 1 21 -12 13226.7 960.499 3
 1 21 -12 13166 942.641 4
 1 21 -13 784.419 269.358 4
 1 21 -13 589.923 270.039 3
 -1 21 -13 752.208 261.731 4
 -1 21 -14 19771.2 1156.39 4
 1 21 -14 19067.4 1133.68 4
 1 21 -14 19446.8 1160.83 3
 1 21 -15 24389.2 1254.64 4
 -1 21 -15 24357.3 1265.03 4
 1 21 -16 19328.2 1054.17 4
 -1 21 -16 18523.6 1039.74 4
 1 21 -17 2847.8 395.265 4
 -1 21 -17 2394.55 372 4
 -1 21 -18 1142.38 236.52 4
 1 -21 18 1100.72 319.625 5
 -1 -21 18 1056.43 296.637 5
 1 21 -18 1062.67 221.495 4
 -1 21 -19 16892.7 772.719 4
 1 21 -19 16721.1 764.034 4
 1 -23 0 414.343 176.379 2
 1 23 0 514.715 189.516 6
 -1 23 0 436.522 171.552 6
 -1 -23 0 201.104 140.338 2
 -1 -23 1 114498 2690.29 2
 1 23 1 115833 2158.29 6
 1 -23 1 108010 2530.46 2
 -1 23 -1 112533 2168.11 6
 1 -23 -1 107755 2251.1 2
 -1 23 1 113442 2089.63 6
 1 23 -1 112583 2173.48 6
 1 23 -2 77.5635 119.11 6
 -1 23 -2 251.702 147.905 6
 -1 23 -2 -63.6119 128.526 4
 -1 23 2 229.451 130.842 6
 1 23 -2 180.444 110.36 4
 1 23 2 156.132 106.641 6
 -1 23 -3 114089 2225.86 6
 1 23 3 116439 2107.78 6
 1 23 -3 111425 2221.45 6
 1 23 -3 112902 2019.7 4
 -1 23 -3 112937 2016.81 4
 1 23 -4 105113 2203.67 6
 1 23 -4 107328 2040.62 4
 -1 23 -4 108463 2062.65 4
 -1 23 -4 108996 2226.88 6
 -1 23 -5 175289 2868.53 6
 1 23 -5 168741 2833.31 6
 1 23 -5 171667 2619.97 4
 -1 23 -5 174154 2680.18 4
 -1 23 -6 108740 2296.7 6
 1 23 -6 106354 2098.78 4
 1 23 -6 109157 2337.38 6
 -1 23 -6 114455 2217.27 4
 1 23 -7 25850 1165.24 6
 -1 23 -7 24577.4 1114.39 6
 1 23 -7 23608.3 1021.38 4
 -1 23 -7 25256 1075.59 4
 -1 23 -8 7130.24 611.753 6
 -1 23 -8 7718.24 621.096 4
 1 23 -8 7731.38 610.236 4
 1 23 -8 8115.76 674.582 6
 -1 23 -9 4204.2 494.113 6
 -1 23 -9 4855.86 526.792 4
 1 23 -9 4439.66 503.789 6
 1 23 -9 5055.97 532.229 4
 1 23 -10 21861.1 1112.22 6
 1 23 -10 22445.4 1152.1 4
 -1 23 -10 21431.6 1104.34 6
 -1 23 -10 23217.1 1181.88 4
 -1 23 -11 277.671 206.272 4
 1 23 -11 115.838 172.187 4
 1 23 -11 52.4563 216.808 6
 1 23 -12 6074.98 666.361 4
 -1 23 -12 5680.64 647.901 4
 -1 23 -12 6629.18 623.262 6
 1 23 -13 882.682 253.535 4
 -1 23 -13 946.919 269.339 4
 1 23 -14 39867.5 1618.93 4
 -1 23 -14 40881.2 1657.37 4
 1 23 -15 19610.8 1099.31 4
 -1 23 -15 19191.7 1100.76 4
 1 23 -16 35401.4 1384.57 4
 -1 23 -16 36038.1 1408.77 4
 1 -23 17 15471.2 1039.19 5
 1 23 -17 15204.7 842.206 4
 -1 23 -17 15294.2 859.622 4
 -1 23 -18 462.646 135.971 4
 -1 -23 18 585.389 241.183 5
 1 23 -18 408.812 123.957 4
 1 -23 18 721.544 270.166 5
 -1 25 0 469.439 211.59 6
 1 25 0 274.177 139.983 6
 -1 25 -1 41818.7 1386.55 6
 -1 25 1 42023 1358.75 6
 1 25 1 40437.4 1354.01 6
 1 25 -1 41238.8 1376.18 6
 1 25 -2 -37.3483 131.106 6
 -1 25 2 257.498 158.964 6
 1 25 2 -49.4554 138.657 6
 -1 25 -2 39.5527 141.887 6
 -1 25 -3 93953.2 2121.46 6
 1 25 -3 94080.4 1930.78 4
 1 25 3 94759.1 2002.84 6
 1 25 -3 89900.3 2099.27 6
 -1 25 -3 92669.7 1909.46 4
 1 25 -4 100505 2255.6 6
 -1 25 -4 102866 2070.18 4
 -1 25 -4 101342 2252.32 6
 1 25 -4 101739 2044.11 4
 -1 25 -5 237671 3475.94 6
 1 25 -5 238948 3526.22 6
 -1 25 -5 245173 3281.05 4
 1 25 -5 243533 3234.78 4
 -1 25 -6 183193 3128.01 6
 1 25 -6 179762 2832.01 4
 -1 25 -6 184963 2922.77 4
 1 25 -6 183700 3162.49 6
 1 25 -7 38929.8 1367.67 4
 -1 25 -7 41190.9 1430.77 4
 1 25 -7 39994.3 1512.95 6
 -1 25 -7 38141.4 1459.68 6
 1 25 -8 4639.88 497.691 4
 -1 25 -8 4957.66 533.819 4
 -1 25 -8 3749.01 445.632 6
 1 25 -8 5126.4 567.872 6
 1 25 -9 30.8583 160.116 4
 1 25 -9 -326.034 340.063 6
 -1 25 -9 34.2191 125.883 4
 -1 25 -9 -163.328 271.715 6
 1 25 -10 13607.1 925.464 4
 1 25 -10 12307.2 859.759 6
 -1 25 -10 12427.2 872.209 6
 -1 25 -10 12746.5 904.733 4
 1 25 -11 340.717 161.511 6
 -1 25 -11 428.625 255.232 6
 -1 25 -11 327.955 201.441 4
 1 25 -11 452.616 221.667 4
 1 25 -12 25563.8 1208.8 6
 -1 25 -12 26049.1 1346.53 4
 1 25 -12 25314.5 1313.8 4
 -1 25 -12 24926.1 1193.74 6
 1 25 -13 2525.29 411.048 4
 -1 25 -13 2648.17 444.33 4
 1 25 -14 37897.8 1559.72 4
 -1 25 -14 38405.5 1576.77 4
 1 25 -15 41048.1 1559.88 4
 -1 25 -15 39009.6 1530.68 4
 -1 25 -16 58084.6 1730.3 4
 1 25 -16 56631.2 1701.05 4
 1 25 -17 24535.2 1024.26 4
 1 -25 17 24290.8 1254.05 5
 -1 25 -17 24015.1 1019.52 4
 1 25 -18 1437.15 227.077 4
 -1 -25 18 1250.45 260.512 5
 1 -25 18 1344.94 301.593 5
 -1 25 -18 1343.8 214.029 4
 1 27 0 145.598 134.302 6
 -1 27 0 458.508 212.266 6
 1 27 1 5624.47 529.305 6
 -1 27 -1 4888.56 516.975 6
 1 27 -1 5155.4 515.839 6
 -1 27 1 5222.57 521.783 6
 1 27 -2 4143.22 480.614 6
 -1 27 -2 4456.98 499.412 6
 -1 27 2 4692.87 474.899 6
 1 27 2 4637.46 488.05 6
 1 27 -3 66083.5 1890.83 6
 -1 27 -3 69762.2 1733.51 4
 1 27 3 74449 1863.68 6
 -1 27 -3 70913.4 1939.03 6
 -1 27 3 72815.4 1791.39 6
 1 27 -3 70672.2 1744.67 4
 1 27 -4 59054.4 1617.53 4
 -1 27 -4 58229.6 1774.49 6
 -1 27 -4 60564.1 1644.73 4
 1 27 -4 56457.2 1775.82 6
 1 27 -5 160928 3035.4 6
 -1 27 -5 163704 3046.03 6
 -1 27 -5 168381 2808.02 4
 1 27 -5 165374 2736.41 4
 1 27 -6 153388 3018.89 6
 1 27 -6 151698 2686.18 4
 -1 27 -6 152948 2746.41 4
 -1 27 -6 148778 2957.04 6
 1 27 -7 10776.4 831.433 6
 1 27 -7 12970.8 824.066 4
 -1 27 -7 13482 858.042 4
 -1 27 -7 10175.7 773.855 6
 1 27 -8 323.209 163.118 6
 1 27 -8 384.457 193.366 4
 -1 27 -8 415.049 206.962 4
 -1 27 -8 -174.599 269.223 6
 1 27 -9 395.284 199.902 4
 -1 27 -9 149.101 175.961 6
 1 27 -9 -244.194 317.889 6
 -1 27 -9 431.791 223.228 4
 1 27 -10 29305 1366.45 4
 -1 27 -10 30776.2 1416.78 4
 1 27 -10 28967.9 1387.3 6
 -1 27 -10 30073.7 1391.35 6
 -1 27 -11 614.11 286.903 6
 1 27 -11 486.345 239.976 6
 -1 27 -11 575.335 286.451 4
 1 27 -11 832.194 307.273 4
 1 27 -12 27752.8 1380.78 4
 -1 27 -12 28991.9 1419.64 4
 1 27 -12 28618.6 1306.69 6
 -1 27 -12 28408.5 1300.42 6
 -1 27 -13 2707.6 437.025 4
 1 27 -13 2671.37 440.947 4
 -1 27 -14 58458.1 1917.91 4
 1 27 -14 58669.6 1908.9 4
 1 27 -15 42990 1551.44 4
 -1 27 -15 43186.1 1562.36 4
 1 -27 16 54956.3 1984.93 5
 -1 27 -16 56284.6 1633.3 4
 1 27 -16 55972.2 1616.05 4
 -1 27 -17 16429.6 796.418 4
 -1 -27 17 16124.7 955.161 5
 1 -27 17 15809.2 982.121 5
 1 27 -17 16292.1 793.132 4
 -1 29 0 369.314 228.614 6
 1 29 0 26.203 135.418 6
 -1 29 -1 29877.3 1278.34 6
 1 29 -1 29009.5 1266.16 6
 -1 29 1 31463.8 1278.84 6
 1 29 1 29826.2 1262.67 6
 -1 29 2 452.354 177.992 6
 -1 29 -2 568.098 271.744 6
 1 29 -2 193.241 162.63 6
 1 29 2 296.867 181.859 6
 -1 29 -3 37187.3 1470.16 6
 1 29 -3 34733.9 1433.25 6
 -1 29 3 36493.7 1330.7 6
 -1 29 -4 35594.9 1454.79 6
 1 29 -4 34723.1 1462.94 6
 1 29 -4 36450.9 1329.54 4
 -1 29 -4 36174.4 1334.24 4
 -1 29 -5 61620.8 1935.4 6
 -1 29 -5 66676.1 1844.83 4
 1 29 -5 65761.3 1809.67 4
 1 29 -5 62663.9 1980.81 6
 1 29 -6 20363.6 1163.99 6
 1 29 -6 19939.7 1007.81 4
 -1 29 -6 18524.7 1071.16 6
 -1 29 -6 20931.4 1047.68 4
 -1 29 -7 8959.58 721.779 4
 1 29 -7 8463.73 676.801 4
 1 29 -7 7695.98 743.98 6
 -1 29 -8 -153.381 199.12 4
 1 29 -8 -532.674 383.434 6
 1 29 -8 21.3785 166.367 4
 -1 29 -8 -105.279 217.927 6
 -1 29 -9 5756.95 626.824 4
 -1 29 -9 5567.69 628.103 6
 1 29 -9 5562.89 595.422 4
 1 29 -9 4844.68 548.62 6
 1 29 -10 67092.1 2063.39 4
 -1 29 -10 62457.6 2025.44 6
 -1 29 -10 66810.8 2094.13 4
 1 29 -10 64909.9 2098.33 6
 1 29 -11 301.212 212.021 4
 1 29 -11 361.102 199.519 6
 -1 29 -11 462.129 280.186 6
 -1 29 -11 774.319 266.069 4
 -1 29 -12 1925.98 387.993 6
 -1 29 -12 1002.42 273.621 4
 1 29 -12 971.359 248.745 4
 1 29 -12 1283.25 337.535 6
 1 29 -13 5759.26 622.265 4
 -1 29 -13 4725.64 565.455 4
 1 29 -14 96794.1 2376.73 4
 -1 29 -14 96844.3 2392.25 4
 -1 29 -15 29058.8 1227.65 4
 1 29 -15 28152.8 1191.48 4
 1 -29 16 23095.8 1238.81 5
 1 29 -16 23210.7 977.304 4
 -1 29 -16 23370.7 988.678 4
 1 -29 17 4718.45 518.24 5
 -1 29 -17 4321.43 382.277 4
 -1 -29 17 4383.21 496.098 5
 1 29 -17 3614.88 351.123 4
 1 31 0 531.497 253.645 6
 -1 31 0 645.787 242.22 6
 1 31 1 87980.7 2253.09 6
 1 31 -1 82804.8 2241.75 6
 -1 31 -1 84147.3 2240.59 6
 -1 31 1 86606.8 2202.63 6
 -1 31 2 -95.4341 232.832 6
 1 31 2 305.772 205.345 6
 -1 31 -2 796.487 260.874 6
 1 31 -2 478.493 262.515 6
 1 31 -3 6960.23 695.677 6
 -1 31 3 5350.25 522.336 6
 1 31 3 5708.9 569.892 6
 -1 31 -3 6608.36 655.973 6
 1 31 -4 2192.22 447.288 6
 -1 31 -4 1289.55 183.703 6
 1 31 -5 1157.89 382.915 6
 -1 31 -5 662.441 225.954 4
 1 31 -6 16797.9 950.595 4
 1 31 -6 17512.4 1103.08 6
 -1 31 -6 15212.2 996.734 6
 -1 31 -6 17268.6 986.366 4
 -1 31 -7 6205.42 649.235 6
 1 31 -7 6449.84 601.431 4
 -1 31 -7 6955.25 644.564 4
 1 31 -7 6989.68 695.194 6
 -1 31 -8 16481.8 986.085 4
 1 31 -8 15586.6 935.994 4
 -1 31 -8 15678.7 1045.94 6
 1 31 -8 16642.2 1063.97 6
 1 31 -9 7476.03 731.939 6
 -1 31 -9 8166.05 769.494 6
 1 31 -9 9916.69 795.222 4
 -1 31 -9 9251.9 783.005 4
 1 31 -10 137808 3117.83 6
 1 31 -10 139403 2927.63 4
 -1 31 -10 132550 3014.64 6
 -1 31 -10 143380 3024.29 4
 -1 31 -11 710.694 317.493 6
 -1 31 -11 694.684 339.444 4
 1 31 -11 1093.47 376.779 4
 1 31 -11 338.416 274.478 6
 1 31 -12 20278.3 1135.74 4
 -1 31 -12 20064.2 1131.39 4
 1 31 -12 19493.5 1082.5 6
 1 31 -13 -52.1621 238.138 4
 -1 31 -13 -178.654 260.415 4
 1 31 -14 31888.5 1298.13 4
 -1 31 -14 32388.6 1317.09 4
 1 31 -15 21670.3 990.944 4
 -1 31 -15 20435.2 962.298 4
 1 -31 15 21346.8 1266.38 5
 1 -31 16 7343.84 709.334 5
 -1 31 -16 7068.41 514.537 4
 -1 -31 16 6911.94 645.064 5
 1 31 -16 7282.04 516.1 4
 -1 33 0 280.153 221.612 6
 1 33 0 1723.48 437.112 6
 1 33 -1 179039 3399.29 6
 -1 33 -1 185333 3430.87 6
 1 33 1 189129 3408.22 6
 1 33 -2 3750.21 539.106 6
 -1 33 -2 2455.73 398.475 6
 1 33 2 3109.19 469.522 6
 -1 33 2 2342.1 377.545 6
 -1 33 -3 26328.6 1319.31 6
 1 33 -3 28048.1 1388.62 6
 1 33 3 21921.2 1110.47 6
 -1 33 3 21439.5 1078.97 6
 1 33 -4 4884.97 627.861 6
 -1 33 -4 4102.15 500.364 6
 -1 33 -5 12924.3 942.929 6
 1 33 -5 14155.6 1020.44 6
 1 33 -6 31648.1 1500.27 6
 -1 33 -6 29675 1443.47 6
 1 33 -7 307.767 226.677 6
 1 33 -7 432.246 198.961 4
 -1 33 -7 1063.55 290.66 4
 -1 33 -7 323.303 258.632 6
 1 33 -8 36584.9 1626.07 6
 1 33 -8 37926.1 1468.65 4
 -1 33 -8 36045.2 1619.02 6
 -1 33 -8 38408.4 1500.09 4
 -1 33 -9 11404.8 930.205 6
 -1 33 -9 13078.1 933.179 4
 1 33 -9 13005.6 897.043 4
 1 33 -9 10135.2 874.018 6
 -1 33 -10 227715 3748.8 4
 -1 33 -10 203225 3685.3 6
 1 33 -10 222317 3656.83 4
 1 33 -10 209354 3841.31 6
 1 33 -11 718.884 319.605 6
 -1 33 -11 1333.56 432.437 4
 -1 33 -11 1122.98 399.436 6
 1 33 -11 1703.63 428.943 4
 -1 33 -12 63531.8 1949.51 4
 1 33 -12 59417.8 1839.98 6
 1 33 -12 63418.8 1927.27 4
 1 33 -13 1095.2 254.908 4
 -1 33 -13 1126.67 243.744 4
 1 33 -14 23.8002 136.283 4
 -1 33 -14 -93.2687 151.567 4
 1 -33 14 277.431 252.104 5
 -1 33 -15 2807.77 348.202 4
 1 33 -15 3161.92 362.669 4
 1 -33 15 2956.19 481.211 5
 -1 35 0 781.548 313.579 6
 1 35 0 2493.86 539.97 6
 1 35 -1 218227 3829.36 6
 -1 35 -1 221625 3853.58 6
 -1 35 1 179552 3369.58 6
 1 35 1 183181 3435.15 6
 1 35 2 14565.1 954.373 6
 -1 35 -2 18904.6 1148.93 6
 1 35 -2 20645.9 1228.56 6
 -1 35 2 14695.3 953.891 6
 -1 35 -3 57436.2 1992.76 6
 -1 35 3 67954.9 1961.59 6
 1 35 -3 60682.2 2071.04 6
 1 35 3 65442.2 1960.41 6
 -1 35 -4 -116.226 321.116 6
 1 35 -4 822.456 232.082 6
 1 35 -5 28605.2 1417.92 6
 -1 35 -5 27990.3 1391.36 6
 -1 35 -6 16917.9 1113.83 6
 1 35 -6 17188.7 1116.12 6
 -1 35 -7 243.813 207.276 6
 1 35 -7 313.347 280.002 6
 1 35 -8 43018.9 1780.7 6
 -1 35 -8 41534.4 1717.08 6
 1 35 -9 9553.16 861.402 6
 -1 35 -9 9932.97 864.09 6
 1 35 -10 178941 3469.83 6
 -1 35 -10 182702 3445.78 6
 1 35 -11 1569.39 429.362 6
 -1 35 -11 1488.43 381.154 4
 -1 35 -11 1547.37 435.593 6
 1 35 -11 1212.41 379.021 4
 -1 35 -12 86233.4 2167.05 4
 1 35 -12 74594.9 1988.17 6
 1 -35 13 2270.5 468.304 5
 1 -35 14 2184.87 406.986 5
 -1 37 0 1602.39 402.695 6
 1 37 0 1164.32 331.858 6
 1 37 1 191386 3558.45 6
 1 37 -1 231009 3995.97 6
 -1 37 -1 234552 4004.53 6
 -1 37 1 197253 3567.34 6
 1 37 2 1578.22 329.97 6
 -1 37 -2 2971.64 489.282 6
 -1 37 2 2350.54 405.694 6
 1 37 -2 3029.59 485.121 6
 1 37 3 1826.28 335.079 6
 1 37 -3 1259.46 273.855 6
 -1 37 -3 1980.54 385.641 6
 -1 37 -4 8024.14 753.238 6
 1 37 -4 7775.94 742.878 6
 -1 37 -5 12946.7 974.977 6
 1 37 -5 14001 1013.3 6
 1 37 -6 12119.3 949.803 6
 -1 37 -6 11740.8 931.836 6
 1 37 -7 -9.60292 239.275 6
 -1 37 -7 642.142 289.421 6
 -1 37 -8 22742.5 1269.98 6
 1 37 -8 24313.3 1316.77 6
 -1 37 -9 6853.09 712.185 6
 1 37 -9 6168.56 671.324 6
 -1 37 -10 123912 2775.34 6
 1 37 -10 127089 2834.5 6
 1 -37 11 1048.64 392.132 5
 1 37 -11 1133.66 345.015 6
 1 -37 12 39424.3 1689.23 5
 -1 -37 13 512.753 235.703 5
 1 -37 13 574.377 254.641 5
 1 39 0 939.757 340.464 6
 -1 39 0 1786.82 444.551 6
 1 39 1 104006 2624.76 6
 -1 39 1 104380 2578.44 6
 -1 39 -1 102374 2653.57 6
 1 39 -1 103234 2690.44 6
 -1 39 2 1318.81 317.373 6
 1 39 -2 1098.91 261.833 6
 -1 39 -2 1621.37 368.971 6
 1 39 2 1040.83 256.516 6
 -1 39 -3 30110.2 1480.72 6
 1 39 -3 30282.3 1490.5 6
 1 39 -4 20899.9 1241.42 6
 -1 39 -4 21122.8 1237.97 6
 1 39 -5 35614.2 1619.42 6
 -1 39 -5 35312.9 1587.21 6
 -1 39 -6 14380.6 1021.23 6
 1 39 -6 15699.7 1073.33 6
 1 39 -7 1932.94 387.492 6
 -1 39 -7 2126.3 440.035 6
 -1 39 -8 6656.07 688.38 6
 1 39 -8 6621.1 690.024 6
 -1 39 -9 4375.7 572.426 6
 1 39 -9 4484.48 576.353 6
 -1 39 -10 51456.7 1698.72 6
 1 39 -10 52135.1 1727.95 6
 -1 -39 11 279.714 202.101 5
 1 39 -11 380.251 226.325 6
 -1 -39 12 4376.04 500 5
 -1 41 0 485.419 256.055 6
 1 41 0 -28.6924 198.275 6
 -1 41 1 12118.3 870.163 6
 1 41 -1 10451.4 845.285 6
 1 41 1 12233.8 880.958 6
 -1 41 -1 11433.5 886.154 6
 -1 41 2 2602.35 411.275 6
 -1 41 -2 1427.5 350.535 6
 1 41 2 2175.37 380.339 6
 1 41 -2 1722.18 354.73 6
 -1 41 -3 40805.2 1671.08 6
 1 41 -3 41032 1696.74 6
 1 41 -4 30902.3 1489.55 6
 -1 41 -4 30721.7 1441.23 6
 1 41 -5 68822.3 2199.94 6
 -1 41 -5 67690.7 2138.77 6
 1 41 -6 40848.1 1685.25 6
 -1 41 -6 42443.7 1682 6
 -1 41 -7 2279.92 438.59 6
 1 41 -7 2067.74 414.801 6
 1 41 -8 2478.12 417.674 6
 -1 41 -8 3486.01 501.944 6
 1 41 -9 1301.94 318.527 6
 -1 41 -9 1452.74 329.532 6
 1 41 -10 12969.9 813.043 6
 -1 43 0 86.4302 148.659 6
 1 43 0 275.095 171.895 6
 1 43 1 3238.24 453.168 6
 1 43 -1 2729.07 432.572 6
 -1 43 1 3006.16 446.787 6
 -1 43 -1 3090.84 449.855 6
 -1 43 -2 592.301 267.357 6
 1 43 -2 427.437 202.283 6
 -1 43 -3 46800.6 1719.64 6
 1 43 -3 49110.2 1814.81 6
 1 43 -4 36450.6 1552.61 6
 -1 43 -4 36470 1527.6 6
 -1 43 -5 79564.4 2220.88 6
 1 43 -5 82216.5 2321.86 6
 1 43 -6 66190 2039.04 6
 -1 43 -6 63217.1 1948.87 6
 -1 43 -7 12363.3 865.987 6
 1 43 -7 11082.9 830.798 6
 -1 43 -8 1347 319.891 6
 1 43 -8 982.923 281.058 6
 1 43 -9 354.383 204.417 6
 1 45 0 14.1776 128.867 6
 -1 45 0 567.759 236.189 6
 1 45 1 9602.12 700.036 6
 -1 45 -1 9902.23 742.015 6
 -1 45 1 9624.48 689.955 6
 1 45 -1 9081.51 724.006 6
 -1 45 -2 616.783 251.928 6
 1 45 -2 530.336 216.676 6
 -1 45 -3 28482.4 1270.84 6
 1 45 -3 28689.3 1311.22 6
 1 45 -4 22946.6 1168.3 6
 -1 45 -4 23124.3 1142.36 6
 -1 45 -5 59525 1806.18 6
 1 45 -5 60174.8 1860.98 6
 -1 45 -6 57788.3 1746.82 6
 1 45 -6 60133.8 1812.75 6
 1 45 -7 16112.9 912.438 6
 1 45 -8 7097.28 580.819 6
 1 47 0 306.137 203.896 6
 1 47 -1 30150.2 1205.72 6
 1 47 -2 388.334 206.677 6
 1 47 -3 2878.64 403.855 6
 1 47 -4 11788.6 783.244 6
 1 47 -5 33661.8 1283.19 6
 1 47 -6 34059.1 1247.54 6
 -2 0 0 261096 1725.15 2
 -2 0 -1 17719.3 405.735 2
 2 0 1 16569.9 410.096 2
 2 0 2 100066 971.171 2
 -2 0 -2 102408 1069.34 2
 2 0 3 6568.51 297.15 2
 2 0 -3 6351.64 367.043 1
 2 0 4 8788.22 394.72 2
 2 0 -4 7999.07 464.814 1
 2 0 5 5460.21 464.793 1
 2 0 5 5695.04 359.502 2
 2 0 -5 5285.13 429.917 1
 2 0 6 142.934 134.17 1
 2 0 -6 242.937 142.592 1
 2 0 6 371.658 113.17 2
 2 0 7 589.947 156.87 2
 2 0 7 630.731 210.336 1
 2 0 8 7681.74 532.063 2
 2 0 8 6839.54 690.337 1
 2 0 9 170084 2646.83 2
 2 0 -10 1077.75 244.616 3
 -2 0 -10 1386.71 268.122 3
 2 0 -11 205560 3306.37 3
 -2 0 -11 192726 2882.62 3
 2 0 -12 7028.19 658.726 3
 -2 0 -12 6472.64 573.31 3
 -2 0 -13 62788 1830.48 3
 2 0 -13 66905.9 2072.41 3
 -2 0 -14 4274.45 503.106 3
 2 0 -14 4927.41 598.994 3
 2 0 -15 848.289 320.577 3
 -2 0 -15 656.127 226.179 3
 2 0 -16 3493.09 527.632 3
 -2 0 -16 3374.76 456.875 3
 -2 0 -17 1715.97 343.424 3
 2 0 -17 1957.53 372.324 3
 -2 0 -18 27490 1245.46 3
 2 0 -18 26627 1331.67 3
 -2 0 -19 2826.91 382.137 3
 2 0 -19 2136.25 365.448 3
 2 0 -20 59782.8 1688.64 3
 -2 2 0 926732 3285.85 2
 -2 2 -1 4418.97 224.493 2
 -2 2 1 4579.36 250.847 2
 -2 -2 -1 4508.37 218.829 2
 2 -2 2 65856.6 931.995 2
 -2 2 -2 64033.7 977.537 2
 -2 -2 -2 64163.9 697.938 2
 2 2 3 23790.6 457.849 2
 2 2 -3 22250.1 625.286 1
 2 -2 3 22656.7 635.971 2
 2 2 4 83012.3 1579.78 1
 2 2 4 83932.1 1012.34 2
 2 -2 4 80940.9 1313.32 2
 2 2 5 182.741 88.8046 2
 2 2 -5 133.741 107.136 1
 2 2 5 53.8448 98.1633 1
 2 -2 5 68.6979 95.5691 2
 2 -2 -5 58.9621 106.865 1
 2 -2 -6 9029.86 625.547 1
 2 -2 6 8572.56 512.432 2
 2 2 6 9087.28 440.527 2
 2 2 6 8225.84 624.183 1
 2 -2 6 8510.1 631.421 1
 2 2 7 10672.3 773.221 1
 2 2 7 12285 562.973 2
 2 -2 7 11685.5 643.907 2
 2 -2 7 11327.3 799.21 1
 2 -2 -7 10403.6 726.342 1
 2 -2 8 8718.95 614.568 2
 2 2 8 7856.9 488.046 2
 2 -2 8 8033.86 727.505 1
 2 2 8 7100.24 711.986 1
 2 2 -9 198183 2873.05 3
 2 2 9 199224 2598.69 2
 -2 2 -9 188092 2564.25 3
 2 -2 9 189573 3021.49 2
 2 2 -10 2521.04 361.13 3
 -2 2 -10 2366.25 313.463 3
 -2 -2 -10 2267.36 317.392 3
 -2 2 -11 83249.2 1906.76 3
 2 -2 -11 89868.6 2180.94 3
 2 2 -11 87766.3 2149.84 3
 -2 -2 -11 82682.8 1889.68 3
 2 -2 -12 1265.7 298.058 3
 -2 2 -12 1220.46 269.986 3
 2 2 -12 1278.94 311.36 3
 -2 -2 -12 1165.23 261.352 3
 2 2 -13 12172.1 903.568 3
 -2 -2 -13 10953.6 763.362 3
 -2 2 -13 11305.9 783.614 3
 2 -2 -13 12617 906.444 3
 -2 -2 -14 653.403 215.759 3
 2 2 -14 908.934 288.249 3
 -2 2 -14 829.884 248.799 3
 2 -2 -14 654.574 268.455 3
 -2 -2 -15 721.773 203.219 3
 2 -2 -15 817.356 291.751 3
 2 2 -15 858.283 337.17 3
 -2 2 -15 945.003 296.621 3
 2 -2 15 811.534 268.928 5
 -2 -2 -16 271.472 185.502 3
 2 2 -16 317.485 204.889 3
 -2 2 -16 346.941 165.849 3
 2 -2 -16 455.161 243.185 3
 2 2 -17 4875.2 589.82 3
 -2 2 -17 5252.95 578.886 3
 -2 -2 -17 4759.58 543.219 3
 2 -2 -17 4293.75 565.306 3
 2 -2 -18 6195.13 635.005 3
 -2 -2 -18 7110.47 627.303 3
 -2 2 -18 6843.98 642.68 3
 2 2 -18 6588.05 680.076 3
 2 2 -19 8874.33 753.451 3
 -2 -2 -19 10260 700.025 3
 2 -2 -19 9036.06 725.821 3
 -2 2 -19 8908.19 690.395 3
 2 2 -20 13983.7 840.273 3
 2 -2 -20 14227.6 806.045 3
 2 2 -21 458.362 168.459 4
 -2 2 -21 774.58 205.049 4
 2 -4 0 129499 1284.17 2
 -2 4 0 127960 1231.9 2
 2 -4 -1 6364.41 330.109 2
 -2 4 1 6287.07 292.013 2
 -2 4 -1 5982.65 305.477 2
 -2 4 2 17192.5 522.813 2
 2 -4 2 17922.2 561.138 2
 2 4 2 18041.9 541.686 1
 -2 -4 -2 18484.2 324.683 2
 -2 4 -2 16376.3 541.799 2
 2 4 -2 17054.1 406.319 1
 2 -4 3 867.744 155.061 2
 2 4 3 624.293 74.1368 2
 2 4 3 1000.78 167.725 1
 2 4 -3 1261.03 152.313 1
 2 -4 4 91664.4 1498.17 2
 2 4 4 92043.2 840.645 2
 2 4 4 90266.7 1655.38 1
 2 4 5 51572.1 1408.55 1
 2 -4 5 48992.5 1194.61 2
 2 4 6 15440.2 475.84 2
 2 -4 6 13387.6 685.137 2
 2 4 6 13965 813.297 1
 2 -4 -6 14066.5 794.233 1
 2 -4 -7 4826.7 512.676 1
 2 -4 7 4733.45 441.464 2
 2 -4 7 5138.15 549.114 1
 2 4 7 5077.48 556.687 1
 2 4 7 5120.88 313.672 2
 2 -4 8 29056.7 1164.59 2
 2 4 8 25942.9 1331.31 1
 2 4 8 29175.5 821.772 2
 2 -4 8 27725.5 1361.13 1
 -2 4 -9 84808.9 1742.04 3
 2 4 -9 88034.3 1932.14 3
 2 -4 9 86456.4 2166.09 2
 2 4 -10 1337.64 272.581 3
 -2 4 -10 1348.76 258.406 3
 2 -4 10 1635.56 340.995 2
 -2 -4 -10 1745.15 269.808 3
 2 4 -11 30792.1 1277.38 3
 -2 4 -11 29868.2 1166.38 3
 -2 -4 -11 31407.1 1152.59 3
 2 4 -12 239.003 144.245 3
 -2 -4 -12 63.6594 134.403 3
 2 -4 -12 -263.088 235.835 3
 -2 4 -12 9.99002 166.671 3
 -2 4 -13 14.1071 175.232 3
 2 4 -13 49.3299 172.974 3
 2 -4 -13 135.631 182.275 3
 -2 -4 -13 74.0683 120.282 3
 -2 4 -14 2872.26 434.8 3
 -2 -4 -14 3844.55 477.069 3
 2 4 -14 3713.74 521.857 3
 2 -4 -14 3423.24 515.437 3
 2 4 -15 11231.1 929.228 3
 -2 -4 -15 9679.35 753.276 3
 -2 4 -15 9748.44 800.671 3
 2 -4 -15 10089.9 866.016 3
 2 -4 -16 5564.63 658.516 3
 2 -4 16 6690.55 729.208 5
 -2 -4 -16 5523.2 575.946 3
 2 4 -16 5471.34 615.839 3
 -2 4 -16 6290.13 669.231 3
 2 -4 -17 2126.35 415.843 3
 -2 -4 -17 2361.21 394.832 3
 2 4 -17 1864.9 381.299 3
 -2 4 -17 2320.28 405.793 3
 -2 -4 -18 19465 1000.14 3
 -2 4 -18 17798.2 1040.5 3
 2 4 -18 18918.9 1150.09 3
 2 -4 -18 18254 1076.22 3
 2 -4 -19 846.226 229.345 3
 2 4 -19 1824.37 396.467 3
 -2 -4 -19 1969.28 326.468 3
 2 -4 -20 15084.9 811.689 3
 2 4 -20 15140.2 885.334 3
 -2 4 -21 385.441 158.216 4
 -2 6 0 4468.26 265.987 2
 2 -6 0 4403.02 261.76 2
 -2 6 -1 1613.81 186.222 2
 2 -6 -1 1508.27 187.255 2
 2 6 1 1431.77 123.138 1
 -2 6 1 1300.66 137.044 2
 -2 6 2 70507.7 1005.53 2
 -2 6 -2 68201.3 1227.92 2
 -2 -6 -2 67191.5 648.015 2
 2 6 3 30214.7 841.013 1
 -2 6 3 30250.8 744.661 2
 2 6 4 60844.1 1376.45 1
 -2 6 4 62222 1144 2
 2 -6 4 61855 1332.43 2
 2 -6 5 8581.56 543.686 2
 2 6 5 8094.22 572.209 1
 2 -6 -5 8486.54 595.838 1
 2 6 6 40938.2 590.358 2
 2 6 6 41252.8 1408.47 1
 2 -6 -6 38741 1365.98 1
 2 6 7 13228.6 393.986 2
 2 -6 -7 11159.2 798.545 1
 2 -6 7 11606.4 719.399 2
 2 -6 7 12093.1 843 1
 2 6 7 12311.1 848.864 1
 2 6 8 3293.12 224.705 2
 2 -6 8 2129.94 380.992 1
 2 -6 8 2682.14 380.059 2
 2 -6 -8 2495.43 409.009 1
 2 -6 9 34397.1 1451.62 2
 -2 6 -9 33124 1116.52 3
 2 6 -9 35226.1 1220.21 3
 -2 6 -10 721.23 213.123 3
 -2 -6 -10 879.259 201.909 3
 2 6 -10 1004.88 256.044 3
 -2 -6 -11 319.949 149.474 3
 -2 6 -11 35.7361 194.233 3
 2 6 -11 361.408 164.622 3
 -2 6 -12 958.839 225.178 3
 2 6 -12 1034.86 300.794 3
 -2 -6 -12 1419.15 279.713 3
 2 -6 -12 1495.68 308.519 3
 -2 -6 -13 19070.7 969.558 3
 2 -6 -13 18814.2 1115.19 3
 -2 6 -13 17547.9 989.546 3
 2 6 -13 17892.3 1082.66 3
 -2 6 -14 7232.68 677.164 3
 -2 -6 -14 9221.97 723.033 3
 2 6 -14 8635.75 802.749 3
 2 -6 -14 7490.98 727.009 3
 -2 -6 -15 58763.8 1796.36 3
 2 -6 -15 61262.4 2065.96 3
 -2 6 -15 59926.2 1961.79 3
 2 6 -15 61456.9 2111.9 3
 -2 -6 -16 43624.9 1549.89 3
 2 -6 -16 42908.4 1738.36 3
 -2 6 -16 44178.7 1711.36 3
 2 6 -16 42507.2 1775.45 3
 2 -6 -17 944.61 266.384 3
 -2 -6 -17 928.006 262.522 3
 2 -6 17 1061.08 331.394 5
 -2 6 -17 1271.59 309.91 3
 2 6 -17 729.24 251.878 3
 2 -6 -18 1547.14 284.872 3
 -2 -6 -18 2093.42 341.575 3
 2 6 -18 1409.68 346.807 3
 -2 6 -18 1894.8 372.664 3
 2 6 -19 992.243 309.276 3
 2 -6 -19 603.578 251.379 3
 2 -6 -20 4805.37 444.925 3
 -2 6 -20 4454.25 479.935 4
 2 6 -20 5250.24 527.392 3
 2 6 -20 4682.52 456.584 4
 -2 8 0 4329.06 295.536 2
 2 -8 0 4493.18 294.122 2
 -2 8 -1 934.283 157.2 2
 2 -8 -1 1371.13 182.461 2
 -2 8 1 1489.69 171.623 2
 -2 8 2 129099 1373.59 2
 2 -8 -2 126939 1669.66 2
 -2 8 3 13118.5 450.324 2
 2 8 3 12850.4 562.696 1
 -2 8 4 406419 2722.96 2
 2 8 4 403080 3556.43 1
 2 8 5 49084.3 1400.7 1
 -2 8 5 50859.4 1093.79 2
 2 -8 -5 49705.4 1475.03 1
 2 -8 5 49695.3 1370.82 2
 -2 -8 5 49595.7 1175.97 1
 2 -8 -6 67239.4 1840.2 1
 2 -8 6 70495.4 1750.16 2
 2 -8 7 110071 2345.33 2
 2 -8 7 112006 2617.32 1
 2 -8 -7 107552 2536.14 1
 2 -8 8 6374.37 611.955 2
 -2 8 8 7471.18 508.799 2
 2 -8 8 6034.62 665.888 1
 2 8 -9 2831.87 353.1 3
 -2 8 -9 2783.35 354.217 3
 -2 -8 -10 241.685 142.519 3
 -2 8 -10 277.182 191.698 3
 2 8 -10 497.649 221.335 3
 2 8 -11 25818.9 1169.66 3
 -2 -8 -11 24194.1 1010.41 3
 -2 8 -11 23816.7 1073.24 3
 2 8 -12 932.691 314.027 3
 -2 8 -12 448.294 144.389 3
 2 -8 -12 698.898 230.945 3
 -2 -8 -12 738.254 216.48 3
 -2 8 -13 59230.4 1837.42 3
 2 -8 -13 59937.6 1952.5 3
 -2 -8 -13 60566.3 1709.25 3
 2 8 -13 59056.8 1947.08 3
 -2 8 -14 18832 1094.92 3
 2 8 -14 19038.2 1172.02 3
 -2 -8 -14 20239.5 1026.09 3
 2 8 -15 79703.3 2403.62 3
 -2 -8 -15 83045.8 2088.55 3
 2 -8 -15 80841.3 2360.61 3
 -2 8 -15 79855 2290.68 3
 -2 -8 -16 23918.1 1128.49 3
 2 8 -16 23592.3 1324.32 3
 -2 8 -16 24801.5 1299.48 3
 2 -8 -16 23932.4 1287.05 3
 2 -8 17 20052.7 1252.75 5
 2 -8 -17 19182.4 1105.13 3
 2 8 -17 20126.2 1212.98 3
 -2 8 -17 19844.5 1141.9 3
 2 8 -18 1513.82 344.599 3
 -2 8 -18 1456.69 337.808 3
 2 -8 18 2202.98 455.127 5
 2 -8 -18 1168.35 265.19 3
 2 -8 -19 135.692 136.533 3
 2 8 -19 327.322 203.985 4
 -2 8 -19 374.526 195.692 4
 2 8 -19 165.201 213.073 3
 2 8 -20 3194.18 425.018 3
 2 8 -20 2885.93 352.001 4
 -2 8 -20 2642.98 369.698 4
 -2 10 0 36412.1 908.208 2
 2 -10 0 40284.6 936.097 2
 2 -10 -1 4439.01 311.624 2
 -2 10 -1 4239.66 341.367 2
 -2 10 1 4081.05 299.982 2
 2 -10 1 4544.79 336.075 2
 2 -10 -2 1959.85 243.425 2
 -2 10 2 1697.57 199.673 2
 -2 -10 3 20864.3 505.491 1
 -2 10 3 20719.5 597.905 2
 -2 10 4 123483 1429.28 2
 2 -10 4 123916 2152.18 2
 -2 -10 5 69396.7 1370.99 1
 2 -10 -5 65132.7 1742.97 1
 2 -10 5 66876.5 1676.5 2
 2 -10 -6 51920.9 1659.86 1
 2 -10 6 49946.5 1557.21 2
 2 -10 -7 135721 2921.83 1
 2 -10 7 145496 2837.26 2
 -2 10 -8 16185.5 758.315 3
 2 -10 8 15888.1 1104.56 1
 2 10 -8 16459.2 794.634 3
 2 -10 8 15915.8 1015.79 2
 2 10 -9 10446.3 673.874 3
 -2 10 -9 10552.5 647.166 3
 -2 10 -10 4796.04 493.595 3
 2 10 -10 4459.22 491.759 3
 -2 -10 -11 3159.86 368.603 3
 2 10 -11 3130.67 428.549 3
 -2 10 -11 2508.28 365.589 3
 2 10 -12 329.397 223.509 3
 -2 10 -12 494.595 223.743 3
 -2 -10 -12 614.424 200.582 3
 -2 10 -13 26162.7 1255.25 3
 2 10 -13 27444.7 1345.68 3
 -2 -10 -13 28220.3 1152.3 3
 2 -10 -13 24712 1247.62 3
 2 10 -14 17181 1115.17 3
 2 -10 -14 16572.1 1050.91 3
 -2 10 -14 15025 995.816 3
 -2 10 -15 39062.9 1622.68 3
 2 10 -15 40679.4 1717.1 3
 2 -10 -15 38256.1 1605.38 3
 -2 10 -16 45632.6 1754.99 3
 2 -10 -16 44494.5 1692.26 3
 2 10 -16 46210.1 1838.29 3
 2 10 -17 11800.6 919.187 3
 -2 10 -17 12397.5 914.064 3
 2 -10 17 10585.9 926.69 5
 2 -10 -17 11403.2 824.552 3
 2 10 -18 2900.14 396.961 4
 2 10 -18 3430.04 495.191 3
 -2 10 -18 2879.37 401.426 4
 2 -10 18 3189.2 506.697 5
 2 -10 -18 3053.5 413.312 3
 2 -10 -19 486.439 163.245 3
 -2 10 -19 251.094 150.127 4
 2 10 -19 806.98 267.722 3
 2 10 -19 423.701 168.544 4
 2 10 -20 515.565 156.878 4
 -2 10 -20 128.862 111.673 4
 2 -12 0 67002 1313.27 2
 -2 12 0 65105.1 1344.72 2
 2 -12 -1 7698.38 442.682 2
 -2 12 1 6479.74 404.769 2
 -2 -12 -1 7195.51 319.43 1
 2 -12 1 7299.37 459.785 2
 -2 12 2 866.606 152.946 2
 2 -12 -2 918.406 184.424 2
 2 -12 2 894.286 206.397 2
 -2 -12 -2 798.834 112.697 2
 -2 12 3 5623.11 353.767 2
 2 -12 -3 4902.14 352.666 2
 -2 -12 3 6009.04 260.747 1
 2 -12 3 6070.68 487.739 2
 2 -12 4 58029.4 1557.13 2
 -2 -12 4 60184.5 1039.85 1
 2 -12 -5 34512.4 1316.63 1
 2 -12 5 34349.8 1279.84 2
 -2 -12 5 37147.9 977.84 1
 2 -12 -6 175205 3159.28 1
 2 -12 6 180331 3121.95 2
 2 -12 -7 50472.6 1835.89 1
 2 -12 7 54383.1 1826.56 2
 -2 12 -8 2446.8 319.648 3
 2 12 -8 2746.53 349.377 3
 2 12 -9 338.921 179.998 3
 -2 12 -9 443.549 158.582 3
 2 12 -10 13203.2 816.068 3
 -2 12 -10 13766.6 800.637 3
 -2 12 -11 1098.03 263.457 3
 2 12 -11 1204.1 272.994 3
 -2 12 -12 137.664 193.283 3
 2 12 -12 -55.4594 233.885 3
 2 -12 -13 9207.68 751.025 3
 -2 12 -13 9407.12 748.019 3
 2 12 -13 9513.61 809.07 3
 2 -12 -14 263.579 204.818 3
 2 12 -14 558.592 307.569 3
 -2 12 -14 155.407 199.494 3
 -2 12 -15 29447.6 1401.55 3
 2 -12 -15 31480.6 1420.78 3
 2 12 -15 30447.7 1498.25 3
 2 -12 -16 14349.4 935.225 3
 2 12 -16 13423.7 1010.31 3
 -2 12 -16 13151.5 964.352 3
 2 -12 17 2063.14 452.9 5
 2 12 -17 1884.84 315.002 4
 2 12 -17 1855.52 407.716 3
 -2 12 -17 2023.52 323.472 4
 2 -12 -17 2065.78 323.384 3
 2 -12 18 5718.19 663.37 5
 2 12 -18 4699.53 489.266 4
 2 12 -18 5079.8 570.17 3
 -2 12 -18 4492.06 488.892 4
 2 12 -19 -98.7994 143.814 4
 2 12 -19 135.657 132.006 3
 -2 12 -19 -188.414 134.279 4
 -2 12 -20 -38.0981 129.099 4
 2 12 -20 20.9203 125.615 4
 -2 -14 0 250721 1503.9 1
 2 -14 0 270586 2842.73 2
 -2 -14 -1 977.91 149.877 2
 2 -14 1 1033.01 180.935 2
 -2 -14 -1 1251.97 150.388 1
 2 -14 -1 1353.24 217.348 2
 2 -14 2 417.209 154.954 2
 -2 14 2 241.087 92.9584 2
 -2 -14 -2 534.063 117.384 2
 2 -14 -2 272.501 124.87 2
 2 -14 3 14758.7 809.709 2
 2 -14 -3 13480.1 645.131 2
 -2 14 3 12048 546.38 2
 -2 -14 3 13608.8 357.802 1
 -2 -14 -3 15649.9 377.299 2
 -2 -14 4 2767.47 217.205 1
 2 -14 4 2768.27 378.506 2
 -2 14 4 2026.03 217.727 2
 2 -14 -5 34483.3 1370.22 1
 2 -14 5 35559.6 1402.97 2
 -2 -14 5 36704 926.498 1
 2 -14 6 7355.01 684.73 2
 -2 14 6 6963.47 319.404 2
 2 -14 -6 5990.45 608.867 1
 -2 14 -7 7738.7 531.742 3
 -2 14 -8 10606.6 628.993 6
 -2 14 -8 11003.9 663.404 3
 2 14 -8 11547.2 688.516 3
 -2 14 -9 89074.9 1880.68 6
 2 14 -9 88770.9 1820.2 6
 2 14 -9 85477.9 1958.84 3
 -2 14 -9 83532.7 1891.8 3
 -2 14 -10 469.723 235.262 3
 2 14 -10 280.256 157.976 3
 2 14 -11 29127.3 1292.52 3
 -2 14 -11 30154.3 1273.46 3
 -2 14 -12 -39.7755 164.818 3
 2 14 -12 -41.6742 189.338 3
 -2 14 -13 13134.9 908 3
 2 -14 -13 13495.6 920.581 3
 2 14 -13 13097.5 931.952 3
 2 -14 -14 3503.75 465.466 3
 2 14 -14 3663.26 534.331 3
 -2 14 -14 3277.01 464.037 3
 2 -14 -15 863.728 279.394 3
 2 14 -15 1167.4 398.014 3
 -2 14 -15 1383.79 370.225 4
 -2 14 -15 525.749 216.196 3
 2 14 -15 928.546 299.821 4
 2 14 -16 803.618 325.255 3
 -2 14 -16 872.283 316.066 3
 2 -14 -16 577.294 191.888 3
 -2 14 -16 812.643 282.977 4
 2 14 -16 495.797 237.33 4
 2 -14 17 -127.683 246.848 5
 -2 14 -17 -11.2039 222.682 4
 2 14 -17 69.237 189.167 4
 2 14 -17 510.309 286.916 3
 -2 14 -18 9128.52 678.753 4
 2 14 -18 9843.47 787.289 3
 2 -14 18 10942 923.994 5
 2 14 -18 9476.72 697.025 4
 -2 -14 19 968.754 293.594 5
 2 14 -19 817.089 211.815 4
 2 -14 19 514.707 217.449 5
 -2 14 -19 464.944 195.024 4
 -2 14 -20 10741.3 634.852 4
 2 14 -20 10651.2 626.624 4
 2 -16 0 114919 2004.25 2
 -2 -16 0 119582 2080.33 2
 2 -16 -1 1092.36 215.506 2
 -2 -16 -1 976.132 134.382 1
 -2 -16 -1 930.994 171.986 2
 2 -16 1 835.477 186.962 2
 -2 -16 -2 3537.96 280.044 2
 2 -16 -2 3748.97 372.256 2
 2 -16 2 3618.47 398.911 2
 -2 -16 -3 8605.22 330.75 2
 2 -16 -3 7502.91 524.762 2
 2 -16 3 8427.92 646.92 2
 2 -16 4 16200 947.734 2
 2 -16 -5 45289.3 1666.63 1
 2 -16 5 46944 1696.86 2
 -2 16 -6 1140.55 206.678 4
 -2 16 -6 1302.28 241.527 3
 2 16 -6 1031.16 196.792 4
 2 -16 -6 1021.02 288.025 1
 -2 16 -7 18731.9 805.018 4
 -2 16 -7 19675.7 874.523 3
 -2 16 -7 18398.4 819.349 6
 2 16 -7 18994.2 843.258 3
 2 16 -7 17885.4 763.874 4
 2 16 -7 18693.4 845.829 6
 2 16 -8 13234.3 745.832 3
 -2 16 -8 11766.7 685.571 6
 2 16 -8 12278.5 670.49 4
 -2 16 -8 13609.1 754.072 3
 -2 16 -8 13441 729.025 4
 2 16 -8 11909.8 698.024 6
 -2 16 -9 66673.7 1761.76 3
 2 16 -9 67259.6 1698.03 4
 -2 16 -9 68089.1 1749.95 4
 -2 16 -9 66187.2 1673.82 6
 2 16 -9 65812.5 1751.24 3
 2 16 -9 64366.3 1627.93 6
 -2 16 -10 807.935 263.275 6
 -2 16 -10 1017.27 342.145 3
 2 16 -10 617.658 266.491 4
 2 16 -10 796.765 265.846 3
 -2 16 -10 1381.21 346.365 4
 -2 16 -11 36195.9 1438.77 4
 2 16 -11 35335.8 1404.27 4
 2 16 -11 33010.3 1410.22 3
 -2 16 -11 34121.7 1377.7 3
 2 16 -12 1818.78 360.959 4
 -2 16 -12 2101.53 426.454 3
 -2 16 -12 1744.68 335.962 4
 2 16 -12 1678.33 350.161 3
 2 16 -13 1520.73 335.248 3
 2 16 -13 2100.11 364.912 4
 2 -16 -13 2112.89 355.256 3
 -2 16 -13 2227.41 379.842 4
 -2 16 -13 2403.22 413.613 3
 2 16 -14 534.926 291.031 3
 2 16 -14 357.206 216.194 4
 2 -16 -14 -40.8117 153.533 3
 -2 16 -14 134.278 208.843 4
 -2 16 -14 128.862 157.222 3
 -2 16 -15 6476.93 657.462 4
 2 16 -15 7082.82 725.952 3
 2 16 -15 6715.89 650.69 4
 2 16 -16 205.784 142.353 4
 2 16 -16 302.766 244.059 3
 -2 16 -16 351.027 195.995 4
 2 -16 17 2858.13 498.133 5
 2 16 -17 3597.9 513.962 3
 2 16 -17 2913.37 396.078 4
 -2 16 -17 2588.47 385.324 4
 -2 16 -18 12082.3 771.731 4
 2 -16 18 13315.4 990.866 5
 2 16 -18 12165.1 771.666 4
 -2 16 -19 9066.15 626.914 4
 -2 -16 19 7979.61 714.195 5
 2 -16 19 8342.17 724.463 5
 2 16 -19 8630.13 610.385 4
 2 -18 0 10038.6 636.88 2
 -2 -18 0 10050 638.125 2
 2 -18 -1 2466.58 316.986 2
 -2 -18 1 1886.37 303.201 2
 2 -18 1 2320.15 312.08 2
 -2 -18 -1 2371.28 288.147 2
 -2 -18 2 12458.3 816.681 2
 2 -18 2 12866.8 789.41 2
 -2 -18 -2 12160.1 543.733 2
 2 -18 -2 12855.2 743.841 2
 -2 -18 -3 522.607 91.4197 2
 2 -18 3 925.037 243.871 2
 -2 -18 3 811.204 228.507 2
 2 -18 -3 574.064 177.152 2
 2 -18 4 63532.6 1979.71 2
 2 -18 -4 61609.9 1950.64 1
 -2 -18 4 59454.7 1961.47 2
 2 18 -5 1179.09 211.835 4
 2 18 -5 734.295 189.289 6
 2 -18 -5 942.262 279.52 1
 -2 18 -5 768.414 185.642 4
 -2 18 -5 1016.43 235.945 6
 2 18 -6 980.221 195.206 4
 -2 18 -6 872.422 186.675 4
 2 18 -6 864.678 189.571 6
 -2 18 -6 437.753 122.9 6
 -2 18 -7 23356.8 989.959 6
 2 18 -7 25112.9 1007.89 3
 2 18 -7 23878.8 1005.51 6
 -2 18 -7 24357 956.812 4
 2 18 -7 24194.8 923.959 4
 2 18 -8 14937.8 826.971 6
 2 18 -8 15052.2 771.263 4
 2 18 -8 16593.5 866.322 3
 -2 18 -8 17543.8 879.28 3
 -2 18 -8 16617.1 830.14 4
 -2 18 -8 14970.3 801.006 6
 2 18 -9 159556 2822.09 3
 -2 18 -9 151788 2599.4 6
 2 18 -9 154441 2649.18 6
 -2 18 -9 159637 2716.55 4
 -2 18 -9 159537 2769.83 3
 2 18 -9 153343 2606.1 4
 2 18 -10 7050.99 645.976 3
 2 18 -10 7769.19 649.897 4
 -2 18 -10 8146.25 675.896 3
 -2 18 -10 7941.51 669.495 4
 2 18 -10 7625.5 604.459 6
 -2 18 -10 7568.68 618.198 6
 -2 18 -11 88321.8 2262.05 4
 2 18 -11 85989.7 2208.92 4
 -2 18 -11 83557.2 2196.37 3
 2 18 -11 84437.2 2285.67 3
 -2 18 -12 206.639 215.246 3
 2 18 -12 -178.595 249.85 3
 2 18 -12 14.0132 227.611 4
 -2 18 -12 28.2047 192.699 4
 2 18 -13 20982.7 1208.81 3
 -2 18 -13 20206.8 1156.02 3
 2 18 -13 21545 1176.94 4
 -2 18 -13 22587.9 1214.76 4
 2 18 -14 1326.91 354.092 3
 2 18 -14 1529.78 332.045 4
 -2 18 -14 1366.41 323.191 4
 2 18 -15 28.3586 188.136 3
 -2 18 -15 224.774 226.39 4
 2 18 -15 154.216 204.904 4
 2 18 -16 494.509 251.305 3
 2 18 -16 563.952 248.57 4
 -2 18 -16 415.745 189.464 4
 2 18 -17 1812.44 329.752 4
 -2 18 -17 1675.71 308.3 4
 2 -18 17 1666.4 381.849 5
 -2 18 -18 21672.3 1023.04 4
 2 -18 18 22013.6 1245.9 5
 2 18 -18 21925 1014.38 4
 -2 -18 19 3809.55 473.217 5
 2 -18 19 3941.53 491.032 5
 -2 18 -19 4217.08 424.358 4
 2 18 -19 4119.16 413.267 4
 2 -20 0 86027.5 1999.22 2
 -2 -20 0 89800.4 2047.68 2
 2 -20 1 1151.06 258.974 2
 2 -20 -1 1385.55 260.444 2
 -2 -20 1 948.688 222.812 2
 -2 -20 -1 1467.93 245.836 2
 -2 -20 -2 295.656 101.847 2
 -2 -20 2 44.3714 162.831 2
 2 -20 -2 318.732 141.304 2
 2 -20 2 376.123 177.186 2
 -2 20 -3 2375.75 310.5 6
 -2 -20 3 2336.11 372.049 2
 2 -20 3 2163.49 375.926 2
 -2 20 -3 2647.62 299.531 4
 2 20 -3 2313.69 313.095 6
 2 20 -3 2360.68 289.576 4
 2 -20 -3 2253.46 325.777 2
 -2 20 -4 3194.95 330.606 4
 2 20 -4 2506.78 322.239 6
 2 20 -4 3165.14 334.558 4
 -2 20 -4 3489.58 394.708 6
 2 -20 -5 1131.1 321.211 1
 -2 20 -5 1065.28 250.145 6
 2 20 -5 686.832 166.272 4
 -2 20 -5 1017.23 215.363 4
 2 20 -5 881.938 196.051 6
 2 20 -6 2672.7 350.315 6
 -2 20 -6 2862.42 348.195 4
 2 20 -6 2640.11 312.407 4
 2 20 -6 2798.28 334.057 3
 -2 20 -6 2348.41 299.727 6
 -2 20 -7 5856.58 507.13 4
 -2 20 -7 5007.35 476.554 6
 2 20 -7 6444.16 528.601 3
 2 20 -7 5321.75 466.894 4
 2 20 -7 5646.13 519.081 6
 2 20 -8 1198.11 270.818 3
 -2 20 -8 861.755 194.291 6
 2 20 -8 905.745 205.111 4
 -2 20 -8 1314.85 254.135 4
 2 20 -8 1131.47 272.699 6
 2 20 -9 52843 1646.23 6
 -2 20 -9 56442.3 1662.07 4
 2 20 -9 54547.1 1601.75 4
 -2 20 -9 51305.1 1599.17 6
 -2 20 -10 2229.32 395.887 4
 2 20 -10 1911.89 319.849 6
 2 20 -10 1783.27 346.528 4
 -2 20 -10 1887.03 349.216 6
 2 20 -10 2088.32 382.243 3
 2 20 -11 9380.92 775.517 3
 2 20 -11 8552.07 722.075 4
 -2 20 -11 9855.78 740.093 6
 -2 20 -11 9032.77 751.985 4
 -2 20 -12 653.629 275.724 4
 2 20 -12 712.269 285.118 3
 2 20 -12 477.567 234.259 4
 -2 20 -13 1400.66 320.509 4
 2 20 -13 980.937 254.825 4
 2 20 -13 1537.19 359.441 3
 2 20 -14 2491.2 421.48 3
 -2 20 -14 2816.36 449.348 4
 2 20 -14 2879.73 446.372 4
 -2 20 -15 5515.76 627.747 4
 2 20 -15 5322.16 596.134 4
 2 20 -15 5929.96 656.706 3
 -2 20 -16 1198.69 308.615 4
 2 20 -16 1041.36 291.029 4
 2 20 -17 406.728 174.581 4
 -2 20 -17 286.586 161.83 4
 -2 20 -18 7463.03 572.434 4
 2 -20 18 7766.89 725.343 5
 2 20 -18 7697.69 578.999 4
 -2 20 -19 4863.13 423.893 4
 2 20 -19 4608.46 408.772 4
 2 -20 19 4550.54 498.805 5
 2 22 0 52284.4 1452.59 6
 2 -22 0 49371.4 1608.7 2
 -2 -22 0 54243.4 1693.32 2
 -2 22 0 52693.1 1415.3 6
 2 -22 -1 325.993 152.281 2
 2 -22 1 264.093 121.235 2
 -2 -22 -1 685.803 196.339 2
 -2 -22 1 160.624 135.535 2
 2 22 -1 261.508 120.174 6
 -2 22 -1 506.02 167.094 6
 2 22 1 318.642 123.52 6
 -2 22 -2 277.173 109.147 4
 2 22 -2 102.763 100.464 4
 2 -22 -2 180.931 118.367 2
 -2 -22 2 -105.19 223.026 2
 -2 22 -2 398.437 172.373 6
 2 22 -2 211.322 121.152 6
 2 -22 -3 1819.81 376.762 1
 -2 22 -3 1610.23 288.622 6
 2 22 -3 1115.23 220.688 6
 2 22 -3 1221.17 230.683 4
 -2 22 -3 1314.13 238.986 4
 2 22 -4 7467.73 527.616 4
 -2 22 -4 7269.58 525.132 4
 2 22 -4 7165.89 568.082 6
 2 -22 -4 7649.83 797.715 1
 -2 22 -4 7692.07 590.15 6
 -2 22 -5 32084.5 1213.41 6
 2 22 -5 31624.1 1110.91 4
 -2 22 -5 32274.1 1131.79 4
 2 22 -5 31041.1 1203.56 6
 -2 22 -6 21274.3 944.269 4
 -2 22 -6 19714.2 961.725 6
 2 22 -6 19528.7 883.694 4
 2 22 -6 21122.9 1015.42 6
 -2 22 -7 16007.9 851.372 4
 -2 22 -7 15911 879.255 6
 2 22 -7 17779.5 886.506 3
 2 22 -7 15969.3 902.86 6
 2 22 -7 15744.4 810.379 4
 2 22 -8 315.026 154.469 4
 -2 22 -8 335.654 121.568 4
 2 22 -8 733.351 237.21 3
 2 22 -8 726.339 258.86 6
 -2 22 -8 315.249 147.567 6
 2 22 -9 424.925 206.939 3
 -2 22 -9 -30.7167 154.825 6
 2 22 -9 62.6211 134.354 4
 2 22 -9 471.5 243.248 6
 -2 22 -9 135.224 131.504 4
 2 22 -10 3959.81 491.34 4
 2 22 -10 5194.41 573.657 3
 2 22 -10 3572.73 419.116 6
 -2 22 -10 4490.82 540.521 4
 -2 22 -10 3742.35 485.976 6
 -2 22 -11 34000.2 1495.74 4
 -2 22 -11 33004.8 1340.94 6
 2 22 -11 34018.6 1472.88 3
 2 22 -11 33183.9 1363.56 6
 2 22 -11 32523.7 1439.41 4
 2 22 -12 1496.46 363.888 4
 2 22 -12 1354.64 337.737 3
 -2 22 -12 719.3 262.687 4
 2 22 -13 264.094 182.036 4
 -2 22 -13 48.9256 196.043 4
 2 22 -13 215.708 214.47 3
 2 22 -14 2811.59 457.828 4
 -2 22 -14 2846.39 455.226 4
 2 22 -15 15532.8 977.771 4
 -2 22 -15 15277.7 991.896 4
 2 22 -16 10945.9 794.526 4
 -2 22 -16 11159.2 810.69 4
 -2 22 -17 3516.59 423.957 4
 2 22 -17 3449.55 412.99 4
 2 -22 17 3485.72 513.062 5
 -2 22 -18 -193.663 155.903 4
 2 -22 18 120.909 181.733 5
 2 22 -18 -51.7788 132.793 4
 2 24 0 18503.2 904.329 6
 2 -24 0 18647.7 1052.03 2
 -2 24 0 19373.3 919.207 6
 -2 24 1 75.5036 148.548 6
 -2 24 -1 101.566 136.844 6
 2 24 -1 -96.4431 146.74 6
 -2 -24 1 212.721 195.104 2
 2 24 1 -34.1302 162.87 6
 2 24 -2 9052.1 644.901 6
 -2 24 -2 9056.02 575.068 4
 2 24 2 9183.75 628.497 6
 -2 24 -2 10015.1 683.296 6
 -2 24 2 9520.33 617.785 6
 2 24 -2 9045.64 571.758 4
 2 24 -3 22140.8 921.77 4
 -2 24 3 23705.9 944.687 6
 2 24 -3 21948.4 1016.64 6
 -2 24 -3 21533.8 892.824 4
 -2 24 -3 23148.8 1045.42 6
 2 24 3 23243.8 988.548 6
 -2 24 -4 109219 2061.55 4
 2 24 -4 108541 2317.62 6
 2 24 -4 111541 2093.99 4
 -2 24 -4 114468 2335.95 6
 2 24 -5 63257.3 1626.44 4
 -2 24 -5 63260.2 1653.58 4
 -2 24 -5 62291 1765.17 6
 2 24 -5 59798.8 1755.01 6
 -2 24 -6 80748.9 1932.23 4
 -2 24 -6 82290.8 2071.69 6
 2 24 -6 77263.5 1845.59 4
 2 24 -6 78071.7 2053.71 6
 2 24 -7 32741.2 1357.05 6
 -2 24 -7 33304.1 1331.89 6
 -2 24 -7 34294.8 1298.19 4
 2 24 -7 30878.7 1181.72 4
 -2 24 -8 4718.57 507.471 6
 2 24 -8 5500.11 594.556 6
 -2 24 -8 5311.02 538.508 4
 2 24 -8 4792.94 495.155 4
 2 24 -9 1016.62 266.667 4
 2 24 -9 1004.75 311.404 6
 -2 24 -9 977.476 256.772 4
 -2 24 -9 703.495 245.728 6
 2 24 -10 632.117 272.323 4
 -2 24 -10 789.856 284.014 6
 2 24 -10 0.64485 272.992 6
 -2 24 -10 582.469 264.503 4
 -2 24 -11 6254.93 658.612 4
 2 24 -11 5810.44 582 6
 2 24 -11 5798.26 617.966 4
 -2 24 -11 7125.68 683.05 6
 -2 24 -12 2231.64 409.046 4
 2 24 -12 1767.1 368.755 4
 -2 24 -13 40845.7 1667.41 4
 2 24 -13 41470.6 1672.9 4
 -2 24 -14 3186.77 454.727 4
 2 24 -14 3464.6 488.298 4
 -2 24 -15 35021.3 1459.63 4
 2 24 -15 35742.5 1444.53 4
 2 -24 16 16906.8 1158.52 5
 2 24 -16 17607.3 964.629 4
 -2 24 -16 16819.1 953.709 4
 -2 24 -17 4503.96 453.347 4
 2 -24 17 4255.11 562.911 5
 2 24 -17 4141.55 429.526 4
 -2 24 -18 3118.26 344.333 4
 -2 -24 18 3606.88 443.287 5
 2 24 -18 3219.07 341.944 4
 2 -24 18 3285.82 447.28 5
 -2 26 0 2583.59 386.426 6
 2 26 0 2726.46 369.324 6
 2 26 1 1189.9 241.618 6
 -2 26 -1 1515.3 313.51 6
 2 26 -1 1092.67 241.268 6
 -2 26 1 1407.83 263.653 6
 2 26 -2 18983.8 975.814 6
 -2 26 -2 20762.1 1024.64 6
 2 26 2 20230 976.025 6
 -2 26 2 20344.4 934.113 6
 2 26 3 7900.64 639.005 6
 -2 26 -3 7288.01 629.565 6
 -2 26 3 7083.79 548.538 6
 -2 26 -3 7321.62 554.733 4
 2 26 -3 7306.43 560.017 4
 2 26 -3 6338.8 581.747 6
 2 26 -4 100653 2342.84 6
 -2 26 -4 103786 2114.99 4
 2 26 -4 103562 2093.32 4
 -2 26 -4 102685 2328.94 6
 -2 26 -5 73065.7 1993.94 6
 2 26 -5 70703.8 2000.96 6
 -2 26 -5 72975.1 1829.49 4
 2 26 -5 69949.2 1765.4 4
 2 26 -6 40521.3 1552.48 6
 2 26 -6 40335.1 1372.13 4
 -2 26 -6 41199.8 1430.1 4
 -2 26 -6 40260.6 1515.31 6
 -2 26 -7 97763 2250.55 4
 2 26 -7 92611.7 2125 4
 -2 26 -7 98975.4 2387.58 6
 2 26 -7 96537.8 2418.13 6
 2 26 -8 1554.83 336.807 6
 -2 26 -8 1679.11 320.568 6
 2 26 -8 2263.4 363.505 4
 -2 26 -8 2294.29 386.84 4
 2 26 -9 2068.07 399.851 6
 -2 26 -9 1570.07 319.404 6
 -2 26 -9 2509.87 417.61 4
 2 26 -9 2341.2 372.071 4
 2 26 -10 963.828 198.924 6
 -2 26 -10 1687.19 373.656 6
 2 26 -10 2077.94 405.485 4
 -2 26 -10 1916.81 419.145 4
 -2 26 -11 14939.7 961.145 6
 -2 26 -11 14746.9 1012.46 4
 2 26 -11 14714.7 997.318 4
 2 26 -11 14002.4 940.572 6
 2 26 -12 689.973 255.819 6
 2 26 -12 522.482 247.405 4
 -2 26 -12 329.748 213.743 4
 2 26 -13 13984.6 957.082 4
 -2 26 -13 14787.6 999.522 4
 -2 26 -14 20350.4 1145.58 4
 2 26 -14 20159.9 1132.67 4
 -2 26 -15 48165.9 1663.43 4
 2 26 -15 48041.3 1631.24 4
 2 26 -16 31607.5 1230.57 4
 -2 26 -16 31076.2 1243 4
 2 -26 16 31418.6 1530.38 5
 2 26 -17 11087.2 663.532 4
 2 -26 17 11511.8 864.354 5
 -2 26 -17 10693.4 656.663 4
 -2 28 0 690.31 179.561 6
 2 28 0 585.984 183.575 6
 -2 28 1 1477.88 201.686 6
 2 28 -1 1797.92 312.639 6
 -2 28 -1 1334.6 276.672 6
 2 28 1 1766.37 303.497 6
 2 28 2 18380.9 978.259 6
 2 28 -2 18051.1 1008.22 6
 -2 28 -2 17252.7 967.329 6
 -2 28 2 19126.1 953.646 6
 2 28 -3 19255 1058.86 6
 -2 28 -3 17884.8 983.234 6
 2 28 3 20940.7 1029.03 6
 -2 28 3 20719.8 982.027 6
 2 28 -4 71838.9 2068.44 6
 2 28 -4 77042.2 1897.21 4
 -2 28 -4 75220.4 2065.09 6
 -2 28 -4 76098.3 1884.68 4
 -2 28 -5 18397.6 953.303 4
 2 28 -5 17420.4 1051.37 6
 2 28 -5 18815.4 942.646 4
 -2 28 -5 16564 999.293 6
 -2 28 -6 38032.9 1524.96 6
 2 28 -6 37413.5 1552.7 6
 2 28 -6 36928.6 1349.81 4
 -2 28 -6 40404.4 1443.66 4
 -2 28 -7 15744.5 931.253 4
 2 28 -7 14231.5 856.537 4
 2 28 -7 12306.6 912.104 6
 -2 28 -7 11453.5 839.697 6
 2 28 -8 688.177 215.584 4
 -2 28 -8 648.597 176.912 4
 2 28 -8 693.619 278.612 6
 -2 28 -8 572.549 194.461 6
 2 28 -9 1057.03 218.525 6
 -2 28 -9 1427.65 326.88 6
 -2 28 -9 1192.71 306.674 4
 2 28 -9 1246.52 301.052 4
 -2 28 -10 1906.59 413.638 6
 -2 28 -10 1514.11 348.471 4
 2 28 -10 1084.2 237.062 6
 2 28 -10 1686.09 371.883 4
 2 28 -11 2872.57 434.7 6
 -2 28 -11 2753.8 464.257 6
 -2 28 -11 3101.25 482.798 4
 2 28 -11 3249.9 489.125 4
 -2 28 -12 1068.97 266.532 4
 2 28 -12 819.328 267.865 6
 2 28 -12 700.728 225.142 4
 2 28 -13 34031.5 1480.79 4
 -2 28 -13 34276.4 1507.19 4
 2 28 -14 6009.88 615.229 4
 -2 28 -14 7026.42 674.955 4
 -2 28 -15 53281.4 1676.47 4
 2 28 -15 54411.6 1676.64 4
 2 -28 15 54320.6 2108.02 5
 -2 28 -16 12126.9 742.557 4
 2 -28 16 11940.2 936.429 5
 2 28 -16 10962.4 687.79 4
 -2 28 -17 2950.37 334.499 4
 2 -28 17 2663.23 404.266 5
 2 28 -17 2572.86 300.236 4
 2 30 0 39147.2 1504.47 6
 -2 30 0 40622.3 1515.95 6
 2 30 -1 2685.79 420.995 6
 -2 30 -1 1926.85 271.14 6
 2 30 1 2937.01 424.879 6
 -2 30 1 2577.49 343.165 6
 -2 30 -2 -242.274 314.123 6
 2 30 -2 108.002 167.651 6
 2 30 2 119.776 151.061 6
 -2 30 2 -161.143 220.045 6
 2 30 3 1383.72 295.904 6
 2 30 -3 1420.1 316.359 6
 -2 30 3 875.034 222.141 6
 -2 30 -3 864.034 187.802 6
 -2 30 -4 2954.68 438.794 6
 2 30 -4 3829.93 531.528 6
 -2 30 -5 19227.6 1012.7 4
 2 30 -5 19099.4 1137.71 6
 2 30 -5 18751.5 973.555 4
 -2 30 -5 18333.6 1072.96 6
 2 30 -6 5101.08 526.472 4
 -2 30 -6 5526.69 594.284 6
 -2 30 -6 5881.83 579.06 4
 2 30 -6 5789.55 664.784 6
 2 30 -7 2382.29 477.505 6
 2 30 -7 2151.16 358.202 4
 -2 30 -7 2324.36 379.824 4
 -2 30 -7 2463.07 405.535 6
 -2 30 -8 -72.0138 172.493 4
 2 30 -8 -217.358 210.386 4
 2 30 -8 473.414 306.987 6
 -2 30 -8 5.27328 188.748 6
 -2 30 -9 19991.5 1177.15 6
 2 30 -9 19367.6 1167.83 6
 -2 30 -9 21521.8 1159.88 4
 2 30 -9 20305.6 1091.33 4
 -2 30 -10 1239.73 358.933 4
 2 30 -10 862.122 324.523 4
 2 30 -10 325.635 225.848 6
 -2 30 -10 1109.95 358.944 6
 -2 30 -11 13652.7 977.354 4
 -2 30 -11 12613.3 914.684 6
 2 30 -11 12772.6 936.677 6
 2 30 -11 13523.6 938.577 4
 2 30 -12 -109.545 224.83 4
 -2 30 -12 -89.3981 232.97 4
 2 30 -12 231.038 192.706 6
 -2 30 -13 13725.9 927.699 4
 2 30 -13 13219.5 897.688 4
 -2 30 -14 6351.48 620.172 4
 2 30 -14 6678.43 619.172 4
 2 -30 15 11653.5 964.15 5
 -2 30 -15 11493.2 742.999 4
 2 30 -15 10821.1 715.816 4
 2 30 -16 7314.43 532.028 4
 2 -30 16 7792.15 730.058 5
 -2 30 -16 7326.8 541.118 4
 2 32 0 89042.1 2347.74 6
 -2 32 0 90237.4 2325.08 6
 2 32 1 689.982 280.709 6
 -2 32 -1 324.203 169.679 6
 2 32 -1 751.066 285.741 6
 -2 32 1 202.848 184.828 6
 2 32 -2 9849.83 821.783 6
 -2 32 -2 9457.83 764.737 6
 -2 32 2 7778.83 663.586 6
 2 32 2 7981.75 701.366 6
 -2 32 3 4156.23 470.387 6
 -2 32 -3 5256.1 573.698 6
 2 32 3 4261.22 508.651 6
 2 32 -3 5606.03 649.963 6
 -2 32 -4 -117.515 260.098 6
 2 32 -4 478.367 287.166 6
 2 32 -5 969.085 314.154 6
 -2 32 -5 355.272 217.269 6
 -2 32 -6 1751.53 358.557 6
 2 32 -6 2705.66 404.199 4
 -2 32 -6 2575.46 437.582 4
 2 32 -6 2618.29 510.51 6
 2 32 -7 816.411 359.538 6
 2 32 -7 206.779 169.833 4
 -2 32 -7 117.517 214.85 6
 -2 32 -7 444.86 180.399 4
 -2 32 -8 7677.49 688.596 4
 2 32 -8 7561.93 667.442 4
 -2 32 -8 7460.66 754.321 6
 2 32 -8 6463.03 669.346 6
 2 32 -9 58748.4 1843.81 4
 2 32 -9 58470.8 2066.55 6
 -2 32 -9 56290 1964.21 6
 -2 32 -9 61096.9 1931.4 4
 -2 32 -10 2349.05 489.965 4
 -2 32 -10 1652.21 402.011 6
 2 32 -10 2547.78 502.157 4
 2 32 -10 1345.26 351.778 6
 -2 32 -11 50553.6 1781.9 6
 2 32 -11 49838.3 1825.23 6
 2 32 -11 54978.3 1836.02 4
 -2 32 -11 55068.4 1862.2 4
 -2 32 -12 732.976 237.725 4
 2 32 -12 1002.34 239.092 4
 2 32 -12 1332.48 365.592 6
 -2 32 -13 3288.45 424.029 4
 2 32 -13 3292.8 410.877 4
 2 32 -14 303.838 174.011 4
 2 -32 14 511.089 351.442 5
 -2 32 -14 277.104 157.362 4
 2 -32 15 2702.24 490.289 5
 2 32 -15 2714.58 357.232 4
 -2 32 -15 2845.75 366.298 4
 -2 32 -16 431.726 157.894 4
 -2 -32 16 507.636 178.683 5
 2 32 -16 548.04 163.311 4
 -2 34 0 173375 3321.1 6
 2 34 0 164947 3284.57 6
 2 34 -1 2418.12 472.641 6
 -2 34 -1 1958.16 381.385 6
 2 34 1 2707.5 476.269 6
 -2 34 1 1556.03 350.033 6
 2 34 -2 140044 3116.93 6
 -2 34 2 113831 2591.85 6
 2 34 2 112042 2631.62 6
 -2 34 -2 141479 3072.11 6
 -2 34 -3 -257.856 307.406 6
 2 34 -3 393.095 281.311 6
 -2 34 3 134.053 149.808 6
 2 34 3 366.798 217.087 6
 2 34 -4 2675.5 498.188 6
 -2 34 -4 1789.13 345.731 6
 -2 34 -5 1866.91 369.659 6
 2 34 -5 3413.74 558.758 6
 -2 34 -6 3519.39 511.499 6
 2 34 -6 4757.41 628.887 6
 -2 34 -7 7015.74 733.249 6
 2 34 -7 6734.83 688.702 6
 2 34 -8 5128.77 603.031 6
 -2 34 -8 6053.88 683.258 6
 2 34 -9 100521 2412.84 4
 -2 34 -9 105441 2520.16 4
 2 34 -9 98841.1 2666.86 6
 -2 34 -9 98917.9 2608.06 6
 2 34 -10 1709.77 407.489 6
 -2 34 -10 2457.62 473.478 6
 -2 34 -10 2970.93 513.642 4
 2 34 -10 3196.07 510.66 4
 2 34 -11 65188.3 2043.06 6
 -2 34 -11 69817.5 2046.96 4
 2 34 -11 69516.4 2014.03 4
 -2 34 -12 626.693 240.457 4
 2 34 -12 918.142 258.818 4
 2 34 -12 1565.13 354.517 6
 2 -34 12 1546.69 494.112 5
 2 34 -13 17592.7 933.323 4
 -2 34 -13 19381.1 992.48 4
 2 -34 13 19678.3 1265.38 5
 -2 34 -14 2167.65 317.326 4
 2 -34 14 2213.64 440.399 5
 2 -34 15 659.243 252.375 5
 -2 36 0 153638 3184.68 6
 2 36 0 148044 3171.86 6
 2 36 1 11129.3 903.835 6
 -2 36 1 8115.85 740.028 6
 -2 36 -1 9500.13 846.834 6
 2 36 -1 9997.32 885.262 6
 2 36 -2 33903.2 1569.05 6
 -2 36 -2 33193 1514.59 6
 -2 36 2 25897.3 1254.5 6
 2 36 2 25739.1 1283.44 6
 2 36 -3 9597.15 865.741 6
 2 36 3 8922.83 729.027 6
 -2 36 -3 9219.76 809.086 6
 2 36 -4 2522.54 487.922 6
 -2 36 -4 1985.28 408.685 6
 2 36 -5 4928.56 584.882 6
 -2 36 -5 5381.76 642.797 6
 -2 36 -6 234.85 246.102 6
 2 36 -6 -115.692 364.9 6
 2 36 -7 -460.913 356.269 6
 -2 36 -7 275.468 263.211 6
 -2 36 -8 7422.5 748.545 6
 2 36 -8 7749.73 799.721 6
 2 36 -9 69288.1 2211.73 6
 -2 36 -9 68500.4 2147.04 6
 2 36 -10 1249.3 338.246 6
 -2 36 -10 2297.03 473.276 6
 2 -36 10 1857.05 471.654 5
 2 36 -11 73802.4 2079.35 6
 2 -36 11 86173.7 2589.13 5
 2 -36 12 1696.78 427.291 5
 2 36 -12 2502.04 405.414 6
 2 -36 13 19504.2 1201.49 5
 2 -36 14 844.628 254.461 5
 2 38 0 199522 3699.02 6
 -2 38 0 203568 3691.57 6
 2 38 -1 835.165 303.965 6
 -2 38 -1 923.994 320.163 6
 -2 38 1 786.26 246.514 6
 -2 38 2 5696.13 588.011 6
 2 38 2 4439.49 512.617 6
 2 38 -2 5261.79 622.164 6
 -2 38 -2 4951.77 604.236 6
 2 38 -3 753.587 225.095 6
 2 38 3 792.86 199.954 6
 -2 38 -3 960.868 284.955 6
 2 38 -4 4930.83 581.086 6
 -2 38 -4 5075.43 633.412 6
 -2 38 -5 1556.19 374.375 6
 2 38 -5 1015.02 256.744 6
 2 38 -6 5179.42 619.882 6
 -2 38 -6 5065.44 617.791 6
 -2 38 -7 1352.69 381.726 6
 2 38 -7 564.017 218.658 6
 -2 38 -8 1892.83 436.81 6
 2 38 -8 1001.18 285.157 6
 -2 38 -9 23736 1226.4 6
 2 38 -9 22134.8 1219.6 6
 2 38 -10 1306.62 353.494 6
 2 -38 10 985.137 308.96 5
 2 38 -11 23659 1120.22 6
 2 -38 11 26234.1 1323.22 5
 2 -38 12 526.663 243.408 5
 -2 40 0 169.421 201.751 6
 2 40 0 -0.73177 265.648 6
 2 40 -1 89.2647 244.559 6
 -2 40 -1 265.427 218.363 6
 -2 40 1 595.57 261.715 6
 2 40 1 104.068 203.035 6
 2 40 -2 1518.47 287.351 6
 2 40 2 1487.97 280.876 6
 -2 40 2 2080.19 407.545 6
 -2 40 -2 1908.88 403.019 6
 -2 40 -3 4251.38 561.515 6
 2 40 -3 3126.98 472.726 6
 2 40 -4 20450.4 1228.82 6
 -2 40 -4 18909.8 1154.44 6
 2 40 -5 18038.6 1143.45 6
 -2 40 -5 18145.8 1132.46 6
 2 40 -6 11326.8 897.191 6
 -2 40 -6 12014.1 913.676 6
 2 40 -7 4193.52 551.542 6
 -2 40 -7 5284.61 621.727 6
 2 40 -8 68.9751 177.558 6
 -2 40 -8 890.106 342.893 6
 2 40 -9 3023.59 461.825 6
 2 40 -10 204.658 184.144 6
 2 40 -11 1823.37 325.027 6
 -2 42 0 1182.85 329.885 6
 2 42 0 429.309 159.965 6
 2 42 1 218.417 148.205 6
 -2 42 -1 288.196 249.048 6
 -2 42 1 770.834 280.15 6
 2 42 -1 133.645 189.896 6
 2 42 2 4582.22 510.801 6
 -2 42 -2 5330.77 604.619 6
 2 42 -2 4446.31 556.382 6
 2 42 -3 3549 514.85 6
 -2 42 -3 3480.08 498.197 6
 -2 42 -4 50515.4 1804.55 6
 2 42 -4 50170.3 1880.48 6
 -2 42 -5 29689 1384.01 6
 2 42 -5 29821.7 1448.93 6
 2 42 -6 15989.9 1035.88 6
 -2 42 -6 16296.4 1016.75 6
 2 42 -7 17457.3 1053.15 6
 -2 42 -7 17982.4 1041.12 6
 2 42 -8 1433.5 319.784 6
 2 42 -9 363.818 187.506 6
 2 42 -10 238.511 186.453 6
 2 44 0 276.502 165.273 6
 -2 44 0 1297.05 307.082 6
 -2 44 -1 273.115 208.353 6
 2 44 -1 -58.9809 170.021 6
 2 44 1 32.8857 171.487 6
 -2 44 -2 11783.2 837.839 6
 2 44 -2 11831.8 873.391 6
 2 44 -3 7977.79 718.967 6
 -2 44 -3 8718.4 742.119 6
 2 44 -4 42826.5 1665.11 6
 -2 44 -4 41299.9 1552.07 6
 -2 44 -5 23760.5 1173.89 6
 2 44 -5 24921.6 1249.03 6
 -2 44 -6 23500.8 1143.95 6
 2 44 -6 23142.7 1176.96 6
 2 44 -7 21779.5 1109.33 6
 2 44 -8 1986.99 353.879 6
 2 44 -9 2804.7 371.223 6
 2 46 0 14696.1 861.593 6
 2 46 1 424.952 200.249 6
 2 46 -1 439.022 204.758 6
 2 46 -2 517.922 203.547 6
 2 46 -3 2416.34 391.14 6
 2 46 -4 11940.1 820.956 6
 2 46 -5 14501.9 888.968 6
 2 46 -6 17106.6 938.326 6
 2 46 -7 20013.3 962.012 6
 2 46 -8 1015.1 244.468 6
 2 48 0 27942.7 1067.8 6
 2 48 -1 1324.2 270.769 6
 2 48 -2 4794.28 479.48 6
 2 48 -3 598.213 191.839 6
 2 48 -4 1903.89 331.256 6
 2 48 -5 6857.3 561.176 6
 -3 1 0 648.139 131.862 2
 3 1 1 98906.2 1183.15 2
 -3 1 -1 98626.8 1226.19 2
 3 -1 2 24309.2 596.312 2
 3 1 2 25274.8 617.07 2
 -3 1 -2 24816 634.06 2
 3 1 3 85713.3 1077.61 2
 3 -1 3 92771.7 1220.4 2
 3 -1 4 5295.73 332.743 2
 3 -1 -4 5335.73 407.807 1
 3 1 4 5267.9 299.188 2
 3 1 -4 5966.91 413.966 1
 3 1 5 43335.5 907.567 2
 3 1 -5 40896 1177.38 1
 3 -1 5 41839 989.627 2
 3 -1 -5 42785 1246.1 1
 3 -1 6 1800.78 240.25 2
 3 1 -6 1845.1 280.828 1
 3 1 6 2220.6 232.551 2
 3 1 6 2082.9 331.829 1
 3 -1 -6 1919.22 308.838 1
 3 1 7 193.69 102.759 2
 3 -1 7 250.4 106.664 2
 3 1 7 209.976 141.688 1
 3 -1 7 280.252 176.987 1
 3 -1 -7 263.23 135.105 1
 3 -1 8 29500.9 1049.85 2
 3 -1 8 28494.3 1408.37 1
 3 1 8 27479.3 1380.3 1
 3 1 8 30622.2 985.764 2
 3 -1 9 6817.06 549.37 2
 3 1 9 7032.92 512.519 2
 -3 1 -10 35761.1 1175.11 3
 -3 -1 -10 36630.4 1175.26 3
 -3 -1 -11 146.135 161.628 3
 -3 1 -11 137.447 112.877 3
 3 1 -11 106.654 212.198 3
 3 1 -12 42064.2 1607.26 3
 -3 -1 -12 39468.6 1356.06 3
 -3 1 -12 38848.8 1361.48 3
 3 -1 -12 42681.4 1622.57 3
 3 1 -13 3494.23 501.547 3
 3 -1 -13 3279.1 478.393 3
 -3 1 -13 3063.6 409.134 3
 -3 -1 -13 3158.41 397.991 3
 -3 1 -14 10128.2 761.36 3
 3 -1 14 10637 888.802 5
 -3 -1 -14 9711.91 736.857 3
 3 -1 -14 11475.1 925.664 3
 -3 -1 -15 4771.68 528.187 3
 -3 1 -15 4279.11 518.359 3
 3 -1 -15 5034.06 647.822 3
 3 1 -15 5075.17 636.106 3
 3 -1 -16 17275.9 1144.47 3
 -3 -1 -16 16841.4 992.104 3
 3 1 -16 17791.4 1169.94 3
 -3 1 -16 17212.4 1014.6 3
 -3 1 -17 12298.7 860.081 3
 3 -1 -17 13431.2 1008.06 3
 3 1 -17 11495.2 929.686 3
 -3 -1 -17 12924.9 866.707 3
 3 1 -18 1824.25 365.249 3
 -3 1 -18 2000.36 355.109 3
 3 -1 -18 1704.92 349.948 3
 -3 -1 -18 2273.32 366.638 3
 3 -1 -19 15015.2 943.276 3
 3 1 -19 15277.3 961.674 3
 3 1 -20 2119.75 348.239 3
 3 -1 -20 1423.2 284.989 3
 -3 3 0 810.147 133.36 2
 -3 3 -1 4766.78 285.205 2
 -3 3 1 4978.87 329.896 2
 -3 -3 -1 5315.97 284.292 2
 -3 3 2 17873.7 595.962 2
 -3 3 -2 16927 579.958 2
 3 -3 2 17050.5 541.308 2
 3 3 3 120311 1292.57 2
 3 -3 3 124376 1576.88 2
 3 3 -3 127288 1542.23 1
 -3 3 -3 117842 1630.77 2
 3 -3 4 7295.35 424.098 2
 3 3 -4 7641.39 439.525 1
 3 -3 5 774.349 173.664 2
 3 -3 -5 837.337 215.768 1
 3 3 -5 606.927 157.368 1
 3 3 5 970.083 135.805 2
 3 3 5 907.981 222.777 1
 3 -3 -6 6694.88 567.188 1
 3 -3 6 7172.39 499.799 2
 3 3 6 6512.86 571.702 1
 3 3 6 7512.16 378.975 2
 3 3 7 9703.55 471.17 2
 3 -3 7 8882.12 747.291 1
 3 -3 7 9584.53 606.221 2
 3 3 7 8417.38 712.33 1
 3 -3 -7 8721.24 702.531 1
 3 -3 8 3111.87 477.381 1
 3 -3 -8 3536.48 489.02 1
 3 3 8 4414.15 348.607 2
 3 -3 8 3683.34 414.687 2
 -3 3 -9 971.893 225.489 3
 3 -3 9 943.423 240.77 2
 -3 -3 -10 27020.7 999.969 3
 3 3 -10 27779.5 1182.45 3
 -3 3 -10 26103 1012.4 3
 3 3 -11 124.683 160.151 3
 -3 3 -11 73.8234 146.455 3
 -3 -3 -11 207.306 139.528 3
 -3 3 -12 16741.3 898.16 3
 -3 -3 -12 17218.9 899.171 3
 3 3 -12 18328.9 1061.59 3
 3 -3 -12 18075.2 1054.71 3
 -3 3 -13 328.344 170.994 3
 3 3 -13 512.421 244.739 3
 -3 -3 -13 300.112 141.468 3
 3 -3 -13 60.1138 227.306 3
 -3 -3 -14 4815.75 515.744 3
 3 3 -14 4846.1 608.65 3
 3 -3 -14 4207.07 573.788 3
 -3 3 -14 3592.9 484.354 3
 3 -3 -15 3806.46 562.531 3
 3 3 -15 3778.03 543.688 3
 3 -3 15 4282.85 619.647 5
 -3 3 -15 3864.73 511.322 3
 -3 -3 -15 3097.89 416.402 3
 -3 -3 -16 1430.51 298.51 3
 3 3 -16 1827.35 393.44 3
 3 -3 -16 1769.37 411.082 3
 -3 3 -16 1628.13 357.23 3
 3 3 -17 3057.62 471.82 3
 -3 3 -17 3819.03 498.23 3
 -3 -3 -17 3855.89 480.286 3
 3 -3 -17 3723.86 539.897 3
 3 3 -18 5199.64 612.139 3
 -3 3 -18 5775.38 581.433 3
 -3 -3 -18 5637.32 538.906 3
 3 -3 -18 5276.37 591.527 3
 3 -3 -19 6190.09 596.753 3
 3 3 -19 6306.82 643.33 3
 3 -3 -20 542.079 194.264 3
 3 3 -20 937.472 285.073 3
 3 -5 0 2266.49 230.71 2
 -3 5 0 2259.55 211.568 2
 -3 5 1 65977.7 1115.94 2
 3 -5 -1 64086.3 1231.78 2
 -3 5 2 461.725 137.088 2
 -3 -5 -2 319.019 88.9281 2
 3 5 -2 514.864 87.6573 1
 -3 5 -2 444.097 136.934 2
 -3 5 3 208595 2239.28 2
 3 5 3 208611 2303.16 1
 3 5 -3 208480 1817.09 1
 3 -5 4 99942.5 1659.84 2
 3 5 4 102117 1834.93 1
 3 5 5 1767.83 273.836 1
 3 5 5 1563.1 154.13 2
 3 -5 5 1237.5 223.553 2
 3 -5 -5 1658.59 278.46 1
 3 -5 6 1081.94 221.695 2
 3 -5 -6 1084.46 231.659 1
 3 5 6 1187.74 254.526 1
 3 5 6 1600.45 178.635 2
 3 5 7 990.315 150.419 2
 3 -5 -7 683.573 220.527 1
 3 5 7 511.92 209.115 1
 3 -5 7 963.452 223.374 2
 3 5 8 7141.53 396.578 2
 3 -5 8 5524.55 527.442 2
 3 -5 8 6002.37 680.987 1
 3 -5 -8 5738.5 632.69 1
 3 -5 9 857.092 237.711 2
 3 5 -9 1020.14 241.565 3
 -3 5 -9 1095.85 227.599 3
 -3 5 -10 1581.31 268.554 3
 -3 -5 -10 1900.9 270.319 3
 3 5 -10 1808.48 302.015 3
 -3 -5 -11 887.188 220.123 3
 3 5 -11 750.492 241.458 3
 -3 5 -11 217.959 142.028 3
 3 5 -12 17949.7 1051.55 3
 -3 5 -12 16917.5 917.118 3
 -3 -5 -12 17772.2 898.7 3
 3 -5 -13 1383.03 350.57 3
 -3 -5 -13 1188.25 249.17 3
 3 5 -13 1064.54 287.325 3
 -3 5 -13 895.743 226.896 3
 3 5 -14 5147.75 635.818 3
 -3 -5 -14 5015.05 510.553 3
 3 -5 -14 3659.18 537.898 3
 -3 5 -14 4136.54 514.019 3
 3 5 -15 5055.03 664.854 3
 3 -5 15 3392.82 541.653 5
 -3 5 -15 5251.47 595.612 3
 3 -5 -15 4527.6 624.447 3
 -3 -5 -15 4107.24 490.933 3
 3 5 -16 3489.19 566.348 3
 3 -5 -16 3024.38 529.58 3
 -3 -5 -16 2213.17 360.792 3
 3 -5 16 2318.94 490.297 5
 -3 5 -16 3114.44 505.058 3
 -3 5 -17 400.971 299.176 3
 3 -5 -17 251.753 209.516 3
 3 -5 17 392.381 221.881 5
 3 5 -17 44.6164 223.485 3
 -3 -5 -17 392.081 149.259 3
 3 -5 -18 508.504 184.42 3
 3 5 -18 650.358 294.175 3
 3 -5 -19 2032.76 350.891 3
 3 5 -19 3117.49 466.386 3
 3 5 -20 891.497 256.677 4
 3 5 -20 1133.62 314.685 3
 3 -5 -20 326.598 190.749 3
 -3 5 -20 1331.23 255.464 4
 -3 7 0 1869.84 207.912 2
 3 -7 0 2067.54 225.938 2
 3 7 0 1774.22 103.549 1
 3 7 1 184830 1475.79 1
 -3 7 -1 173693 2016.11 2
 3 -7 -1 181741 2145.9 2
 -3 7 1 175298 1820.06 2
 3 7 2 11189.9 460.807 1
 -3 7 -2 11064.6 547.531 2
 -3 7 2 10975.9 469.258 2
 -3 7 3 131019 1761.48 2
 -3 -7 -3 132445 933.764 2
 -3 7 -3 126768 1953.8 2
 3 7 3 129972 1829.64 1
 3 -7 4 131362 2049 2
 -3 7 4 132026 1946.43 2
 3 7 4 130091 2075.94 1
 3 7 5 7394.5 554.084 1
 3 -7 5 8174.73 557.592 2
 3 -7 -5 8173.02 617.145 1
 -3 7 5 8147.51 520.421 2
 3 7 6 7163.34 611.453 1
 3 -7 -6 7022.32 615.16 1
 -3 7 6 7317.39 511.833 2
 3 -7 6 7256.37 554.952 2
 3 -7 -7 6623.01 655.764 1
 3 7 7 6958.31 659.871 1
 3 -7 7 6297.69 557.526 2
 -3 7 7 5182.96 447.954 2
 -3 7 8 11985.2 745.434 2
 3 -7 8 14295.5 885.972 2
 -3 7 -9 3291.7 368.521 3
 3 -7 9 3351.51 460.533 2
 3 7 -9 3631.34 406.738 3
 -3 -7 -10 41720.7 1226.95 3
 -3 7 -10 40511.6 1315.46 3
 3 7 -10 42328.3 1444.13 3
 -3 7 -11 395.818 205.147 3
 3 7 -11 548.5 225.5 3
 -3 -7 -11 631.224 206.657 3
 3 7 -12 15726.2 977.76 3
 -3 7 -12 15345.2 899.327 3
 -3 -7 -12 16584.5 860.508 3
 3 7 -13 4535.58 578.16 3
 3 -7 -13 4472.27 563.247 3
 -3 -7 -13 4546.86 477.919 3
 -3 7 -13 3115.77 430.196 3
 3 7 -14 28787.2 1444 3
 -3 7 -14 21689.9 1151.01 3
 3 -7 -14 21199.8 1250.11 3
 -3 -7 -14 27367.5 1175.5 3
 -3 7 -15 4245.56 576.508 3
 3 -7 -15 4419.93 608.835 3
 3 7 -15 5040.77 676.055 3
 -3 -7 -15 4199.25 486.524 3
 3 7 -16 1729.32 385.132 3
 3 -7 16 2036.03 475.225 5
 -3 7 -16 2461.84 431.589 3
 3 -7 -16 2197.44 434.68 3
 3 7 -17 2958.12 478.647 3
 3 -7 -17 2378.32 408.229 3
 -3 7 -17 2875.04 458.933 3
 3 -7 17 2634.39 467.09 5
 3 7 -18 7701.3 750.135 3
 3 -7 -18 7949.47 707.086 3
 3 7 -19 6022.15 621.508 3
 3 7 -19 5448.88 533.013 4
 -3 7 -19 5480.22 543.44 4
 3 -7 -19 4922.08 504.782 3
 3 7 -20 1734.65 340.196 3
 3 7 -20 1192.9 253.596 4
 -3 7 -20 1090.47 294.695 4
 3 -7 -20 755.916 211.698 3
 3 -9 0 620.538 158.355 2
 -3 9 0 623.852 162.927 2
 -3 9 -1 16647.1 677.539 2
 3 -9 -1 18266.9 712.116 2
 -3 9 1 17281.7 617.194 2
 -3 9 2 23964.6 700.952 2
 3 9 2 26349.2 705.393 1
 -3 9 -2 25124.9 865.248 2
 3 -9 -2 24952.6 850.371 2
 -3 9 3 58866.2 1120.09 2
 3 9 3 58083.8 1245.18 1
 -3 9 4 11554.3 529.034 2
 3 -9 4 10880.2 633.189 2
 3 9 4 11225.1 622.1 1
 3 -9 -5 24134.1 1084.6 1
 3 9 5 23494.4 997.615 1
 3 -9 5 23617.3 990.552 2
 -3 9 5 25610 859.443 2
 3 -9 -6 9926.17 762.49 1
 -3 9 6 8129.81 528.252 2
 3 -9 6 10436.4 701.639 2
 3 9 6 9504.98 701.136 1
 3 -9 -7 37374.2 1566.6 1
 3 -9 7 35146.2 1374.91 2
 3 -9 8 26284.9 1264.58 2
 -3 9 -8 27378.7 996.919 3
 3 9 -8 28466.9 1064.14 3
 -3 9 -9 6495.43 518.306 3
 3 9 -9 7866.35 594.366 3
 3 9 -10 97881 2214.85 3
 -3 9 -10 96503.6 2037 3
 -3 9 -11 330.091 206.802 3
 3 9 -11 536.614 251.014 3
 -3 9 -12 75557.7 1984.34 3
 3 9 -12 75279.2 2154.63 3
 3 -9 -13 5396.14 622.999 3
 3 9 -13 4927.01 603.092 3
 -3 9 -13 4097.77 502.999 3
 3 -9 -14 25091.1 1344.65 3
 3 9 -14 27438.4 1414.97 3
 -3 9 -14 27018.7 1293.04 3
 3 9 -15 4796.43 648.607 3
 -3 9 -15 4886.76 599.553 3
 3 -9 -15 5901.38 669.932 3
 3 9 -16 11761.3 951.835 3
 3 -9 16 12158.8 1018.79 5
 3 -9 -16 11917.7 923.904 3
 -3 9 -16 12013.3 889.176 3
 3 -9 17 27430.2 1499.5 5
 3 9 -17 26201 1385.93 3
 3 -9 -17 24553.5 1265.09 3
 -3 9 -17 28602.6 1344.15 3
 3 -9 18 1215.86 336.724 5
 3 9 -18 539.917 179.146 4
 3 9 -18 941.58 292.108 3
 3 -9 -18 814.871 206.686 3
 3 9 -19 14726.3 838.753 4
 3 -9 -19 14846.4 837.734 3
 3 9 -19 16082.5 969.349 3
 -3 9 -19 14685.5 857.536 4
 3 9 -20 1069.35 258.391 3
 3 9 -20 576.414 190.568 4
 -3 9 -20 617.341 216.902 4
 -3 11 0 96.6187 112.665 2
 3 -11 0 81.7868 119.358 2
 3 -11 -1 32242.8 975.648 2
 -3 11 1 31315.2 915.205 2
 3 -11 1 32176.9 958.733 2
 3 -11 -2 5405.59 439.007 2
 -3 11 -2 5264.01 434.551 2
 -3 11 2 6018.89 387.157 2
 3 -11 2 5828.88 435.984 2
 -3 -11 -3 4558.46 170.419 2
 -3 -11 -3 4115.31 179.191 2
 -3 11 4 19312.5 671.38 2
 3 -11 4 17846.4 854.526 2
 -3 11 5 5580.44 369.732 2
 3 -11 5 7288.08 589.869 2
 3 -11 -5 7322.6 613.31 1
 3 -11 -6 49613 1746.3 1
 3 -11 6 50101.3 1616.58 2
 3 -11 7 4540.95 538.558 2
 -3 11 7 3439.3 314.418 2
 3 -11 -7 4282.28 541.991 1
 3 11 -8 14385.8 770.291 3
 -3 11 -8 14263.3 741.334 3
 -3 11 -9 4089.03 437.844 3
 3 11 -9 3994.96 438.522 3
 3 11 -10 14730.1 871.114 3
 -3 11 -10 14559.6 814.616 3
 -3 11 -11 1067.26 306.158 3
 3 11 -11 1324.47 323.22 3
 3 11 -12 32641.1 1430.21 3
 -3 11 -12 31027.4 1312.53 3
 -3 11 -13 283.845 172.459 3
 3 -11 -13 11.051 171.087 3
 3 11 -13 314.057 224.69 3
 3 -11 -14 4607.19 534.735 3
 -3 11 -14 4134.94 509.9 3
 3 11 -14 4934.79 605.425 3
 -3 11 -15 2195.18 409.885 3
 3 -11 -15 2001.75 400.885 3
 3 11 -15 2412.02 475.765 3
 3 11 -16 13405 1010.73 3
 3 -11 -16 13908.1 961.981 3
 -3 11 -16 14562.7 988.263 3
 3 -11 16 15011 1117.71 5
 3 11 -17 1509.86 353.817 3
 3 -11 -17 1414.12 254.097 3
 -3 11 -17 1234.41 241.604 4
 3 11 -17 1274.87 249.17 4
 3 -11 -18 5053.13 518.371 3
 3 -11 18 5659.97 668.157 5
 3 11 -18 4553.34 488.81 4
 -3 11 -18 5236.05 526.586 4
 3 11 -18 5194.38 592.082 3
 3 -11 -19 5184.31 483.886 3
 3 -11 19 5230.54 580.476 5
 3 11 -19 5382.24 504.029 4
 -3 11 -19 5106.31 501.029 4
 3 11 -19 5128.48 547.03 3
 3 11 -20 7.96062 98.4813 4
 -3 11 -20 51.4249 94.9854 4
 3 -13 0 67.9336 101.562 2
 -3 13 0 2.22711 96.7942 2
 -3 13 -1 543.89 152.893 2
 3 -13 -1 670.59 174.598 2
 3 -13 1 634.192 173.815 2
 -3 13 1 601.526 157.741 2
 -3 13 2 4647.74 374.933 2
 3 -13 -2 4735.06 440.772 2
 3 -13 2 4813.89 422.582 2
 3 -13 3 375.734 121.069 2
 -3 13 3 448.27 134.248 2
 -3 -13 -3 463.452 70.839 2
 -3 13 4 329.509 112.851 2
 3 -13 4 331.753 176.772 2
 -3 13 5 1224.51 183.611 2
 3 -13 5 1374.57 288.162 2
 3 -13 -5 1033.76 256.181 1
 3 -13 6 44543.2 1596.95 2
 3 -13 -6 48110.3 1784.26 1
 -3 13 -7 2008.69 294.912 3
 -3 13 -8 5883.51 483.07 6
 3 13 -8 5947.55 508.385 3
 -3 13 -8 6092.82 499.173 3
 -3 13 -9 11654.1 707.96 6
 3 13 -9 9739.42 679.964 3
 -3 13 -9 10015.7 662.699 3
 3 13 -10 4169.84 478.408 3
 -3 13 -10 4567.78 478.454 3
 -3 13 -11 724.956 247.084 3
 3 13 -11 854.783 257.426 3
 -3 13 -12 258.847 203.063 3
 3 13 -12 125.059 146.088 3
 -3 13 -13 870.801 266.879 3
 3 13 -13 625.758 228.24 3
 3 -13 -14 -296.183 305.211 3
 -3 13 -14 -2.32545 271.383 3
 3 13 -14 74.6525 185.133 3
 3 13 -15 139.389 231.712 3
 3 -13 -15 -96.9352 271.597 3
 -3 13 -15 -8.59403 215.137 3
 3 13 -16 816.604 284.165 3
 3 -13 16 792.309 319.593 5
 3 -13 -16 905.087 243.029 3
 -3 13 -16 932.825 270.493 4
 3 13 -16 656.608 207.377 4
 3 13 -17 55.5404 179.148 3
 3 -13 17 304.275 228.96 5
 3 -13 -17 -121.627 186.241 3
 3 13 -17 26.7263 169.813 4
 -3 13 -17 -237.769 239.397 4
 3 13 -18 368.84 194.109 3
 -3 13 -18 287.577 155.327 4
 3 -13 18 646.992 294.724 5
 3 13 -18 170.974 132.082 4
 3 -13 -18 157.473 197.379 3
 -3 -13 19 154.427 209.038 5
 3 13 -19 118.282 142.302 3
 3 -13 19 164.402 194.293 5
 -3 13 -19 -21.9928 131.887 4
 3 13 -19 3.92637 134.038 4
 3 13 -20 -226.848 152.909 4
 -3 13 -20 -614.289 176.851 4
 -3 15 0 112.483 100.127 2
 3 -15 0 -10.2498 85.4173 2
 -3 15 1 3920.53 384.749 2
 3 -15 -1 4253.49 413.517 2
 3 -15 1 3684.24 374.096 2
 3 -15 -2 2594.52 355.862 2
 3 -15 2 2241.81 302.669 2
 -3 -15 -2 2450.67 227.427 2
 -3 15 2 2232.99 270.728 2
 -3 15 3 18221.6 779.115 2
 3 -15 3 17053.4 875.785 2
 -3 -15 -3 17812.5 439.109 2
 3 -15 -3 17178.3 809.07 2
 3 -15 4 9436.28 691.081 2
 -3 15 4 7393.16 487.719 2
 3 -15 5 98900.2 2358.36 2
 3 -15 -5 97799.7 2473.5 1
 3 -15 -6 14801.4 1046.7 1
 -3 15 -6 15843.3 696.041 4
 3 15 -7 1913.09 266.821 6
 3 15 -7 1912.11 253.552 4
 -3 15 -7 2075.27 271.251 4
 3 15 -7 2222.09 316.521 3
 -3 15 -7 2241.81 307.873 3
 -3 15 -7 2089.97 281.608 6
 3 15 -8 14537.1 730.531 4
 -3 15 -8 14835.7 768.563 6
 3 15 -8 14771.9 764.044 6
 -3 15 -8 15405.8 776.938 4
 -3 15 -8 15807.1 805.133 3
 3 15 -8 15631.4 828.701 3
 3 15 -9 10864.5 723.548 3
 -3 15 -9 10940.2 689.185 6
 3 15 -9 10567.4 653.673 6
 -3 15 -9 10226.5 683.238 3
 -3 15 -10 10703.1 739.584 3
 3 15 -10 11224.3 765.001 3
 -3 15 -10 12352.8 783.082 6
 3 15 -11 50.8256 199.482 3
 -3 15 -11 333.636 225.309 3
 -3 15 -12 22084.9 1135.83 3
 3 15 -12 21682.4 1173.09 3
 -3 15 -13 4287.27 537.814 3
 -3 15 -13 4834.59 571.123 4
 3 15 -13 5012.21 608.609 3
 3 15 -13 4747.54 558.654 4
 -3 15 -14 3142.81 488.407 3
 3 15 -14 3628.85 492.927 4
 -3 15 -14 3642.03 480.738 4
 3 -15 -14 3126.05 430.261 3
 3 15 -14 3863.97 541.977 3
 3 -15 -15 2943.29 453.034 3
 3 15 -15 3206.24 476.662 4
 3 15 -15 3147.62 524.391 3
 -3 15 -15 3336.9 497.726 4
 -3 15 -16 6370.6 623.58 4
 3 -15 -16 6679.62 635.091 3
 3 -15 16 6730.04 784.76 5
 3 15 -16 6619.26 622.437 4
 3 15 -16 6901.37 715.938 3
 3 -15 17 4839.92 639.581 5
 3 15 -17 5479.24 617.116 3
 -3 15 -17 4166.75 482.755 4
 3 15 -17 4254.95 474.376 4
 3 15 -18 1792.7 299.759 4
 -3 15 -18 1592.45 294.855 4
 3 -15 18 2210.07 419.711 5
 3 15 -18 2455.84 401.787 3
 -3 15 -19 6512.91 550.068 4
 3 -15 19 6606.67 639 5
 3 15 -19 7302.77 567.763 4
 -3 -15 19 7005.14 658.722 5
 3 -17 0 307.12 150.479 2
 3 -17 1 19997.8 927.238 2
 -3 -17 -1 21481.9 847.422 2
 3 -17 -1 21155 953.122 2
 3 -17 -2 242.023 173.969 2
 -3 -17 -2 145.732 85.1245 2
 3 -17 2 289.939 163.234 2
 3 -17 3 10402.4 739.287 2
 -3 17 3 9030.57 586.145 2
 -3 -17 -3 10645.7 374.192 2
 3 -17 -3 9854.55 669.807 2
 3 -17 4 100135 2373.18 2
 -3 17 4 80939.5 1686.18 2
 -3 17 -5 116394 1906.16 4
 3 -17 -5 116530 2876.81 1
 -3 17 -5 115113 2081.4 6
 3 17 -6 28981.2 1083.77 6
 3 17 -6 29009.6 952.476 4
 -3 17 -6 31012 1014.96 4
 -3 17 -6 29281.5 1054.75 6
 -3 17 -7 40087.3 1207.47 4
 3 17 -7 37096.9 1122.77 4
 3 17 -7 37713.6 1260.87 6
 -3 17 -7 38511.2 1248.77 6
 3 17 -7 40725.5 1263.71 3
 -3 17 -8 75839.9 1744.64 4
 3 17 -8 76364.4 1840.08 3
 3 17 -8 72438.2 1650.37 4
 -3 17 -8 72469.5 1744.53 6
 3 17 -8 69767.7 1749.59 6
 3 17 -9 3357.89 409.948 6
 -3 17 -9 3932.81 441.112 4
 -3 17 -9 3307.13 424.09 3
 -3 17 -9 3707.56 427.861 6
 3 17 -9 3770.36 420.252 4
 3 17 -9 3746.16 450.509 3
 -3 17 -10 19101.9 955.722 6
 3 17 -10 19120.2 941.001 6
 3 17 -10 18962.4 1024.27 3
 3 17 -10 18392.6 955.425 4
 -3 17 -10 19219.9 991.092 4
 -3 17 -10 18736.7 999.162 3
 -3 17 -11 460.856 255.249 3
 -3 17 -11 158.583 150.116 4
 3 17 -11 512.812 242.931 3
 3 17 -11 460.349 203.969 4
 -3 17 -12 18205.2 1064.02 3
 3 17 -12 19214.9 1075.95 4
 3 17 -12 18989.6 1113.69 3
 -3 17 -12 15793.1 994.359 4
 3 17 -13 394.298 194.958 4
 -3 17 -13 174.468 173.705 4
 3 17 -13 690.585 280.735 3
 3 17 -14 15323.2 1044.23 3
 3 -17 -14 16267.6 1029.69 3
 3 17 -14 15743 990.246 4
 -3 17 -14 14803.2 978.785 4
 3 17 -15 7070.07 717.087 3
 3 17 -15 7197.56 685.636 4
 3 -17 -15 7720.83 706.407 3
 -3 17 -15 6736.37 674.952 4
 3 17 -16 11276.4 809.214 4
 -3 17 -16 12155.4 844.468 4
 3 17 -16 12052.1 910.309 3
 3 -17 16 12053 1031.56 5
 3 -17 17 21881.8 1330.71 5
 3 17 -17 21146.7 1054.45 4
 3 17 -17 21302 1157.1 3
 -3 17 -17 20480.7 1047.35 4
 3 17 -18 4536.93 470.112 4
 -3 17 -18 4872.04 501.038 4
 3 -17 18 5167.05 631.46 5
 -3 17 -19 15265.8 775.977 4
 3 -17 19 14712 917.907 5
 -3 -17 19 15021.9 918.282 5
 3 17 -19 15108.9 763.92 4
 3 -19 0 712.628 193.504 2
 -3 -19 0 591.492 200.717 2
 3 -19 1 536.151 201.602 2
 3 -19 -1 482.585 191.224 2
 -3 -19 -1 278.604 109.089 2
 -3 -19 1 314.474 103.07 2
 3 -19 2 77.1947 151.482 2
 -3 -19 -2 364.269 124.611 2
 3 -19 -2 137.393 136.208 2
 3 19 -3 99025.7 1959.13 6
 3 -19 3 100512 2414.11 2
 3 -19 -3 93288.8 2151.04 2
 -3 19 -4 24125.2 869.949 4
 -3 19 -4 25629 1004.88 6
 3 19 -4 24512.3 887.132 4
 3 19 -4 24392.8 1004.32 6
 3 19 -5 57468.2 1385.67 4
 -3 19 -5 61768.4 1457.7 4
 3 19 -5 59277 1590.7 6
 -3 19 -5 60791.7 1585.78 6
 3 19 -6 55987.3 1415 4
 3 19 -6 57778.3 1611.6 6
 3 19 -6 60089.1 1480.61 3
 -3 19 -6 59070 1489.65 4
 -3 19 -6 57875.1 1578.58 6
 -3 19 -7 6659.6 518.96 4
 3 19 -7 6204.67 488.209 4
 3 19 -7 6005.1 499.716 3
 -3 19 -7 5445.85 498.617 6
 3 19 -7 5623.93 514.617 6
 -3 19 -8 39735.2 1360.33 6
 3 19 -8 39951.9 1383.68 6
 3 19 -8 40742.1 1285.29 4
 3 19 -8 44844.9 1436.35 3
 -3 19 -8 43614.9 1377.49 4
 3 19 -9 4511.44 507.273 3
 -3 19 -9 4268.86 462.973 6
 3 19 -9 4153.14 462.897 4
 -3 19 -9 4225.76 465.918 4
 3 19 -9 4338.81 480.307 6
 3 19 -10 9801.67 716.801 6
 -3 19 -10 9255.78 697.438 6
 3 19 -10 8513.42 662.443 4
 -3 19 -10 8991.46 698.471 4
 3 19 -10 10810.1 789.564 3
 3 19 -11 1085.78 315.039 3
 -3 19 -11 621.288 178.432 4
 3 19 -11 825.316 290.661 4
 -3 19 -11 1033.93 313.931 6
 -3 19 -12 13646.8 931.031 4
 3 19 -12 13663.9 925.272 4
 3 19 -12 13885.3 969.549 3
 3 19 -13 897.988 287.302 3
 -3 19 -13 1061.67 308.457 4
 3 19 -13 850.781 248.5 4
 3 -19 -13 1044.48 281.837 3
 3 19 -14 2723.04 413.407 4
 3 19 -14 2773.62 467.581 3
 -3 19 -14 3054.9 465.895 4
 3 19 -15 1692.85 350.465 4
 -3 19 -15 1505.67 374.594 4
 3 19 -15 1362.85 367.564 3
 -3 19 -16 10008.3 788.643 4
 3 19 -16 9331.46 777.161 3
 3 19 -16 9756.09 762.96 4
 3 -19 16 9087.3 903.828 5
 3 -19 17 6775.13 742.092 5
 3 19 -17 7038.72 613.642 4
 -3 19 -17 6959.97 612.925 4
 3 -19 18 4930.67 586.997 5
 3 19 -18 4880.07 467.112 4
 -3 19 -18 4738.58 457.445 4
 3 -19 19 16488.4 936.033 5
 3 19 -19 16875.1 767.271 4
 -3 19 -19 17471.7 796.411 4
 3 21 0 -8.61706 90.2804 6
 -3 -21 0 -110.033 139.46 2
 3 -21 0 -103.515 124.29 2
 3 -21 1 15290.4 924.744 2
 -3 -21 1 14848.6 918.918 2
 -3 -21 -1 15009.2 791.82 2
 3 21 -1 14557 772.45 6
 -3 21 -1 16324.8 787.709 6
 3 -21 -1 15058.7 914.27 2
 -3 21 -2 2551.5 312.126 6
 3 -21 2 2576.87 399.458 2
 -3 21 -2 2830.86 303.652 4
 3 -21 -2 2896.38 433.678 2
 3 21 -2 3051.27 364.718 6
 -3 -21 2 2736.25 410.312 2
 3 21 -2 3004.71 310.399 4
 -3 21 -3 38655.9 1260.56 6
 3 21 -3 38615.4 1135.82 4
 3 21 -3 36043.8 1253.25 6
 -3 21 -3 36094.2 1085.69 4
 -3 21 -4 672.858 118.448 6
 3 21 -4 856.486 193.713 4
 3 -21 -4 1188.46 350.795 1
 3 21 -4 608.979 189.022 6
 3 21 -5 71.5062 89.8502 4
 -3 21 -5 -81.9429 202.127 6
 -3 21 -5 197.62 132.228 4
 3 21 -5 -244.178 207.102 6
 -3 21 -6 2297.56 303.571 6
 -3 21 -6 2156.76 294.939 4
 3 21 -6 1810.73 275.673 6
 3 21 -6 2031.09 299.466 3
 3 21 -6 1835.62 276.045 4
 -3 21 -7 8055.12 628.341 6
 3 21 -7 7624.37 560.916 4
 -3 21 -7 8508.84 619.265 4
 3 21 -7 7965.06 631.931 6
 3 21 -7 8336.09 613.233 3
 3 21 -8 995.641 224.689 4
 3 21 -8 1069.39 268.48 6
 -3 21 -8 1065.8 234.657 6
 -3 21 -8 1346.41 274.683 4
 3 21 -8 1665.52 297.099 3
 3 21 -9 784.729 249.895 3
 -3 21 -9 838.288 268.095 6
 3 21 -9 747.643 227.373 4
 -3 21 -9 806.552 230.486 4
 3 21 -9 1060.15 273.223 6
 -3 21 -10 5199.31 554.783 4
 3 21 -10 5471.56 561.114 4
 -3 21 -10 6170.97 603.358 6
 3 21 -10 6242.34 620.279 3
 3 21 -10 5940.89 580.435 6
 3 21 -11 2392.93 334.52 6
 -3 21 -11 2849.87 440.63 6
 3 21 -11 2974.56 461.831 3
 -3 21 -11 1951.15 380.889 4
 3 21 -11 3147.46 461.79 4
 3 21 -12 1911.04 365.574 4
 3 21 -12 2099.25 422.826 3
 -3 21 -12 1641.47 349.492 4
 3 21 -13 943.384 277.128 3
 -3 21 -13 675.715 233.034 4
 3 21 -13 912.103 292.408 4
 -3 21 -14 60.484 211.707 4
 3 21 -14 323.835 174.012 3
 3 21 -14 363.378 176.61 4
 3 21 -15 2590.06 432.942 4
 -3 21 -15 2630.3 438.884 4
 3 21 -15 2582.55 436.267 3
 -3 21 -16 343.381 208.748 4
 3 21 -16 131.255 167.303 4
 3 -21 16 139.209 219.175 5
 3 21 -17 910.363 241.188 4
 -3 21 -17 633.28 183.311 4
 3 -21 17 1066.67 346.396 5
 3 21 -18 296.48 114.727 4
 -3 21 -18 299.88 116.657 4
 3 -23 0 5.54969 116.313 2
 3 23 0 11.0134 95.0605 6
 -3 -23 0 -43.4086 160.138 2
 -3 23 0 -177.991 221.541 6
 3 23 1 10189.1 670.927 6
 -3 23 1 10230.3 640.97 6
 3 23 -1 10943.6 708.759 6
 -3 -23 1 10267.1 836.801 2
 -3 23 -1 10756.5 665.413 6
 3 -23 -1 10215.9 814.64 2
 -3 23 -2 1342.37 196.602 6
 3 23 -2 1644.14 259.738 4
 -3 23 -2 1525.82 247.151 4
 3 23 -2 1590.93 298.943 6
 -3 23 2 1427.69 209.326 6
 3 23 2 1497.4 267.9 6
 3 23 -3 8366.67 570.745 4
 -3 23 -3 8182.41 610.26 6
 -3 23 -3 8580.3 558.261 4
 3 23 -3 9043.23 661.741 6
 3 23 3 9132.45 627.979 6
 3 23 -4 196.65 179.99 6
 3 23 4 980.707 212.558 6
 -3 23 -4 750.368 202.326 4
 3 23 -4 793.258 204.047 4
 -3 23 -4 617.802 146.47 6
 -3 23 -5 4811.53 478.539 6
 3 23 -5 5029.82 459.173 4
 3 23 -5 4616.94 482.824 6
 -3 23 -5 5342.46 474.04 4
 3 23 -6 4123.22 474.525 6
 -3 23 -6 4639.76 468.257 4
 -3 23 -6 4122.39 454.028 6
 3 23 -6 4442.91 444.68 4
 -3 23 -7 4793.38 514.718 6
 3 23 -7 5361.34 560.654 6
 -3 23 -7 5071.88 501.799 4
 3 23 -7 4857.55 468.55 4
 3 23 -8 11855.3 840.212 6
 -3 23 -8 12497.2 800.065 4
 -3 23 -8 11655.9 807.89 6
 3 23 -8 10220.6 717.925 3
 3 23 -8 11792.3 742.453 4
 -3 23 -9 8892.49 713.077 4
 3 23 -9 9776.36 722.538 4
 -3 23 -9 9852.76 756.137 6
 3 23 -9 10214.3 793.501 6
 3 23 -9 8597.79 693.966 3
 3 23 -10 6703.74 647.082 4
 -3 23 -10 5843.62 603.558 4
 3 23 -10 7779.69 694.795 6
 -3 23 -10 6813.72 649.681 6
 3 23 -10 6077.7 639.041 3
 -3 23 -11 177.096 251.135 4
 3 23 -11 251.309 177.72 4
 -3 23 -11 890.768 330.288 6
 3 23 -11 414.937 241.259 3
 3 23 -11 -359.008 328.297 6
 -3 23 -12 36017.1 1566.28 4
 3 23 -12 35627.5 1545.42 4
 3 23 -12 37350.4 1605.82 3
 3 23 -13 1200.84 306.527 4
 -3 23 -13 925.823 230.543 4
 3 23 -13 1047.15 317.607 3
 3 23 -14 482.073 148.317 4
 -3 23 -14 301.449 177.651 4
 3 23 -15 5347.34 576.135 4
 -3 23 -15 5114.48 567.853 4
 -3 23 -16 3928.22 469.759 4
 3 23 -16 3739.54 457.405 4
 3 -23 16 4214.09 601.801 5
 3 23 -17 314.315 153.335 4
 3 -23 17 136.988 188.852 5
 -3 23 -17 324.219 145.783 4
 3 23 -18 -86.7499 114.513 4
 -3 23 -18 18.4422 143.484 4
 3 -23 18 290.752 188.397 5
 3 25 0 126.197 119.611 6
 -3 25 0 -474.946 280.167 6
 -3 25 1 85380.5 1937.69 6
 3 25 -1 78265.7 1972.22 6
 3 25 1 82629 1992.33 6
 -3 25 -1 84229 1982.07 6
 -3 25 2 7208.55 552.081 6
 3 25 -2 6588.28 577.823 6
 3 25 2 7385.19 592.744 6
 -3 25 -2 6969.48 570.762 6
 3 25 -3 45332.7 1534.89 6
 3 25 -3 48635.4 1386.15 4
 -3 25 3 48055.1 1385.73 6
 -3 25 -3 48749.1 1557.67 6
 3 25 3 49325.9 1513.3 6
 -3 25 -3 46695.2 1342.52 4
 3 25 -4 19044 884.519 4
 3 25 -4 18199.8 992.112 6
 3 25 4 19517.2 936.661 6
 -3 25 -4 19063.5 884.75 4
 -3 25 -4 19201.1 982.884 6
 -3 25 -5 4950.02 526.125 6
 3 25 -5 5239.43 490.204 4
 -3 25 -5 5443.43 495.185 4
 3 25 -5 5060.49 516.917 6
 -3 25 -6 20376 1060.22 6
 3 25 -6 20199.7 956.268 4
 -3 25 -6 21371.1 1009.02 4
 3 25 -6 20363.4 1098.69 6
 3 25 -7 20988.5 994.54 4
 -3 25 -7 20106.6 1092.34 6
 -3 25 -7 21707.7 1055.72 4
 3 25 -7 20999.4 1131.9 6
 -3 25 -8 43699.5 1538.75 4
 3 25 -8 44953.9 1500.55 4
 3 25 -8 47429.2 1710.53 6
 3 25 -9 1294.98 344.015 4
 3 25 -9 669.308 282.712 6
 -3 25 -9 702.865 301.821 6
 -3 25 -9 613.634 254.093 4
 3 25 -10 27933.8 1293.55 4
 -3 25 -10 28098.4 1336.71 4
 3 25 -10 27341.1 1310.54 6
 -3 25 -10 25877.4 1247.7 6
 3 25 -11 915.055 309.937 4
 -3 25 -11 859.255 327.061 4
 3 25 -11 548.298 187.551 6
 3 25 -12 10666.8 843.95 4
 -3 25 -12 10402.6 843.922 4
 -3 25 -13 2151.01 357.159 4
 3 25 -13 2270.59 394.373 4
 3 25 -14 32687 1425.76 4
 -3 25 -14 32820.9 1434.9 4
 -3 25 -15 6044.09 597.643 4
 3 -25 15 5811.66 737.921 5
 3 25 -15 5873.93 582.27 4
 -3 25 -16 8367.73 652.972 4
 3 25 -16 8039.6 637.377 4
 3 -25 16 8789.31 865.085 5
 3 25 -17 3713.4 386.205 4
 -3 25 -17 3760.4 396.91 4
 3 -25 17 3951.8 531.652 5
 3 -25 18 2726.24 402.906 5
 3 25 -18 2133.81 264.042 4
 -3 25 -18 2212.75 275.985 4
 3 27 0 -55.9641 145.231 6
 -3 27 0 -333.705 261.118 6
 -3 27 1 26364.7 1124.62 6
 -3 27 -1 24500.7 1125.31 6
 3 27 -1 25774.5 1176.21 6
 3 27 1 24785 1130.17 6
 -3 27 -2 -145.735 264.974 6
 -3 27 2 266.445 130.501 6
 3 27 2 277.123 125.351 6
 3 27 -2 341.16 151.597 6
 -3 27 -3 49820.7 1646.58 6
 3 27 -3 48386.9 1663.72 6
 3 27 3 50605 1594.85 6
 -3 27 3 53527.5 1542.78 6
 -3 27 -4 13333.2 770.891 4
 3 27 -4 12740.8 764.392 4
 3 27 -4 12052 850.392 6
 -3 27 -4 12537.5 839.984 6
 3 27 4 13452.3 804.857 6
 -3 27 -5 14497.2 833.05 4
 3 27 -5 14842 822.176 4
 -3 27 -5 13981.1 907.838 6
 3 27 -5 13913.3 925.098 6
 3 27 -6 2977.63 396.792 4
 -3 27 -6 2628.66 387.977 4
 -3 27 -6 2309.45 345.268 6
 3 27 -6 2736.75 446.468 6
 -3 27 -7 15253 912.099 4
 -3 27 -7 13425.5 939.13 6
 3 27 -7 15159.9 1002.3 6
 -3 27 -8 23100 1147.77 4
 3 27 -8 23842.4 1130.44 4
 3 27 -8 20293.6 1166.89 6
 -3 27 -8 20654.9 1136.08 6
 3 27 -9 1064.71 340.189 6
 -3 27 -9 1000.87 304.997 4
 -3 27 -9 1104.36 357.763 6
 3 27 -9 1278.52 328.602 4
 3 27 -10 46494.7 1691.81 4
 -3 27 -10 48158.6 1764.46 4
 3 27 -10 44543.8 1721.24 6
 -3 27 -10 44220.3 1676.93 6
 3 27 -11 289.056 239.421 4
 -3 27 -11 752.738 355.296 6
 -3 27 -11 492.009 307.554 4
 3 27 -11 -347.727 259.778 6
 -3 27 -12 27518 1362.94 4
 3 27 -12 26869.7 1270.91 6
 3 27 -12 26271 1320.83 4
 3 27 -13 4684.42 541.086 4
 -3 27 -13 5266.21 588.555 4
 3 27 -14 40582.8 1560.5 4
 -3 27 -14 39509.2 1559.36 4
 -3 27 -15 6228.33 599.149 4
 3 27 -15 6266.28 581.82 4
 3 -27 15 6198.87 764.674 5
 3 -27 16 4301.06 610.425 5
 -3 27 -16 3900.38 431.789 4
 3 27 -16 4011.5 428.136 4
 -3 27 -17 6335.21 484.16 4
 3 -27 17 6740.18 656.515 5
 3 27 -17 6180.34 472.656 4
 3 29 0 -83.9567 198.947 6
 -3 29 0 -477.408 335.302 6
 3 29 1 22188.2 1120.75 6
 3 29 -1 22110.7 1144.58 6
 -3 29 -1 22660.6 1132.62 6
 -3 29 1 23168.5 1086.03 6
 -3 29 2 3820.53 437.032 6
 3 29 2 5334.66 539.398 6
 3 29 -2 4689.42 523.33 6
 -3 29 -2 4527.94 509.837 6
 3 29 3 12258.2 815.234 6
 -3 29 3 13070.5 806.931 6
 -3 29 -3 16272.1 970.187 6
 3 29 -3 16119.8 998.436 6
 3 29 -4 305.591 143.467 6
 -3 29 -4 85.0535 206.1 6
 3 29 4 295.784 172.365 6
 -3 29 -5 406.583 176.339 4
 3 29 -5 417.984 213.631 6
 3 29 -5 502.524 167.188 4
 -3 29 -5 390.401 198.75 6
 3 29 -6 16269.8 899.613 4
 3 29 -6 16297.9 1060.02 6
 -3 29 -6 15350.1 1009.65 6
 -3 29 -6 13764.1 858.298 4
 3 29 -7 917.061 211.932 4
 -3 29 -7 812.019 252.056 4
 3 29 -7 1135.13 344.933 6
 -3 29 -7 1028.79 292.653 6
 -3 29 -8 5120.68 548.551 4
 3 29 -8 4818.23 511.718 4
 -3 29 -8 4671.22 570.313 6
 3 29 -8 5166.29 637.995 6
 3 29 -9 2250.96 460.627 6
 -3 29 -9 1651.97 363.484 4
 3 29 -9 1308.05 279.319 4
 -3 29 -9 1804.46 434.423 6
 -3 29 -10 4254.8 559.427 4
 3 29 -10 3260.14 471.677 4
 3 29 -10 2929.51 446.426 6
 -3 29 -10 3255.94 503.047 6
 3 29 -11 194.586 215.544 4
 -3 29 -11 94.2791 182.055 4
 3 29 -11 89.9025 166.395 6
 3 29 -12 42473.7 1656.63 4
 -3 29 -12 41434.2 1654.58 4
 3 29 -12 41045.9 1582.08 6
 -3 29 -13 464.244 201.392 4
 3 29 -13 875.659 251.139 4
 3 29 -14 208.791 185.142 4
 -3 29 -14 190.635 178.699 4
 3 -29 14 663.464 374.959 5
 -3 29 -15 5164.89 520.831 4
 3 -29 15 4953.07 678.747 5
 3 29 -15 5314.23 524.433 4
 -3 29 -16 4646.31 438.582 4
 3 -29 16 3973.5 543.687 5
 3 29 -16 3961.63 402.055 4
 3 -29 17 68.9228 138.441 5
 -3 31 0 -255.345 268.827 6
 3 31 0 -194.623 205.226 6
 -3 31 -1 3893.39 490.478 6
 3 31 -1 4116.89 508.545 6
 3 31 1 4243.31 511.354 6
 -3 31 1 3949.38 471.168 6
 -3 31 2 238.683 150.053 6
 3 31 2 58.4325 141.053 6
 3 31 -2 137.581 204.383 6
 -3 31 -2 -174.749 324.987 6
 -3 31 3 7050.3 615.878 6
 -3 31 -3 8641.13 741.568 6
 3 31 -3 7804.9 726.74 6
 3 31 3 6987.48 637.962 6
 3 31 4 337.21 200.045 6
 -3 31 -4 71.9554 252.098 6
 3 31 -4 405.451 209.053 6
 3 31 -5 9038.25 814.687 6
 -3 31 -5 8940.51 781.874 6
 -3 31 -6 11280 881.369 6
 3 31 -6 10748.7 750.19 4
 -3 31 -6 11511.9 804.325 4
 3 31 -6 11714 934.697 6
 -3 31 -7 14432.7 1010.61 6
 3 31 -7 14952.2 1067.2 6
 3 31 -7 14795.5 888.837 4
 -3 31 -7 15653.3 956.3 4
 3 31 -8 4324.2 484.88 4
 -3 31 -8 4618.62 519.671 4
 3 31 -8 4855.42 627.329 6
 -3 31 -8 4271.77 582.356 6
 -3 31 -9 765.72 277.093 4
 3 31 -9 67.3066 369.433 6
 3 31 -9 589.553 226.679 4
 -3 31 -9 676.173 256.663 6
 3 31 -10 3904.82 511.368 4
 3 31 -10 2701.38 410.704 6
 -3 31 -10 3275.83 500.835 6
 -3 31 -10 4568.63 577.017 4
 3 31 -11 572.699 276.581 4
 -3 31 -11 811.889 286.01 4
 3 31 -11 338.189 184.724 6
 3 31 -12 225.2 153.298 4
 3 31 -12 378.904 193.443 6
 -3 31 -12 81.5003 177.147 4
 3 31 -13 -223.993 181.047 4
 3 -31 13 -32.0047 220.72 5
 -3 31 -13 -360.356 251.58 4
 3 31 -14 509.529 194.978 4
 -3 31 -14 495.496 199.795 4
 -3 31 -15 3051.46 390.556 4
 3 -31 15 2445.57 484.801 5
 3 31 -15 3339.51 397.904 4
 -3 31 -16 588.274 190.275 4
 3 -31 16 222.54 168.941 5
 3 31 -16 654.684 175.718 4
 -3 33 0 154.857 208.358 6
 3 33 0 119.823 162.292 6
 3 33 -1 35409.6 1551.52 6
 3 33 1 37348.1 1553.32 6
 -3 33 -1 36821.4 1550.41 6
 -3 33 -2 10455.6 829.253 6
 3 33 2 9123.57 759.046 6
 3 33 -2 10846.7 890.109 6
 -3 33 2 9406.94 743.18 6
 -3 33 3 11250.7 786.102 6
 -3 33 -3 9135.45 792.603 6
 3 33 -3 10159.4 869.845 6
 -3 33 -4 47.1753 201.235 6
 3 33 -4 167.194 211.097 6
 -3 33 -5 16442.7 1079.46 6
 3 33 -5 17832.5 1162.42 6
 -3 33 -6 25186.3 1334.33 6
 3 33 -6 25239.7 1378.67 6
 -3 33 -7 3195.87 520.303 6
 3 33 -7 3470.63 555.036 6
 3 33 -8 23358.7 1145.15 4
 -3 33 -8 25178.1 1229.87 4
 3 33 -8 23636.6 1323.68 6
 -3 33 -8 23973.2 1287.99 6
 3 33 -9 2213.86 320.856 6
 3 33 -9 3339.92 468.133 4
 -3 33 -9 3423.81 546.502 6
 -3 33 -9 3259.47 470.168 4
 -3 33 -10 14507.4 950.441 4
 3 33 -10 14033.6 914.351 4
 3 33 -10 12919.3 945.421 6
 -3 33 -10 13263.1 941.1 6
 3 33 -11 473.795 276.212 4
 -3 33 -11 442.217 232.207 4
 3 -33 11 36.574 218.704 5
 3 33 -11 140.209 182.607 6
 -3 33 -12 15515.3 945.61 4
 3 33 -12 14167.6 902.93 6
 3 -33 12 15821.7 1193.66 5
 3 33 -12 15402.4 931.536 4
 3 33 -13 1090.65 236.7 4
 -3 33 -13 1011.01 233.446 4
 3 -33 13 1352.78 364.218 5
 3 33 -14 5844.41 513.087 4
 3 -33 14 6179.02 713.638 5
 -3 33 -14 6171.32 529.062 4
 3 -33 15 4253.1 579.039 5
 -3 33 -15 4304.85 415.747 4
 -3 35 0 1307.51 341.485 6
 3 35 0 1908.6 433.136 6
 -3 35 -1 88003.6 2436.06 6
 3 35 -1 85542.9 2459.25 6
 3 35 1 85279.7 2380.56 6
 -3 35 -2 64.4135 184.908 6
 -3 35 2 167.562 169.76 6
 3 35 -2 426.115 260.583 6
 3 35 2 318.804 225.448 6
 3 35 -3 508.752 289.251 6
 3 35 3 419.268 247.753 6
 -3 35 -3 151.076 227.216 6
 3 35 -4 12330.7 982.574 6
 -3 35 -4 10956.8 910.468 6
 3 35 -5 31149.1 1553.68 6
 -3 35 -5 30782.7 1493.29 6
 3 35 -6 9481.45 867.233 6
 -3 35 -6 9138.7 837.944 6
 -3 35 -7 6682.86 734.958 6
 3 35 -7 5373.1 649.623 6
 -3 35 -8 25152.5 1315.81 6
 3 35 -8 25351.3 1376.3 6
 3 35 -9 2560.72 417.056 6
 -3 35 -9 3179.76 519.198 6
 3 -35 9 3547.22 586.274 5
 3 35 -10 23893.4 1271.86 6
 3 -35 10 28655.2 1535.97 5
 3 -35 11 252.386 355.087 5
 3 35 -11 385.724 220.956 6
 3 -35 12 26184.6 1495.96 5
 3 35 -12 23992.6 1117.51 6
 3 -35 13 2258.36 466.63 5
 3 -35 14 15849.3 1054.86 5
 3 37 0 1587.95 442.094 6
 -3 37 0 1623.1 413.68 6
 -3 37 -1 9200.25 810.756 6
 -3 37 1 7806.68 719.77 6
 3 37 1 10533.1 854.349 6
 3 37 -1 10452.6 889.104 6
 -3 37 -2 3216.21 485.993 6
 3 37 2 2574.3 420.807 6
 3 37 -2 3168.73 541.92 6
 -3 37 2 3429.48 479.639 6
 -3 37 -3 32612.4 1508.33 6
 3 37 3 35966.6 1472.37 6
 3 37 -3 33899.6 1606.47 6
 3 37 -4 6660.86 764.294 6
 -3 37 -4 6176.46 706.311 6
 -3 37 -5 258.884 296.76 6
 3 37 -5 367.289 268.428 6
 -3 37 -6 2404.71 457.53 6
 3 37 -6 1707.19 314.622 6
 3 37 -7 1025.72 264.73 6
 -3 37 -7 1937.86 439.437 6
 -3 37 -8 8211.32 757.594 6
 3 37 -8 7672.71 742.963 6
 3 37 -9 1167.03 271.195 6
 -3 37 -9 2296.81 469.458 6
 3 37 -10 6405.32 674.881 6
 3 -37 10 7358.53 742.637 5
 3 -37 11 129.235 220.094 5
 3 37 -11 163.084 211.964 6
 3 -37 12 13248.4 969.965 5
 3 37 -12 11368.9 729.421 6
 3 -37 13 956.957 297.711 5
 -3 39 0 492.861 243.549 6
 3 39 0 807.142 312.94 6
 3 39 -1 3807.75 562.03 6
 -3 39 -1 3829.35 521.844 6
 3 39 1 3781.09 515.058 6
 -3 39 1 3756.79 517.668 6
 -3 39 2 1128.12 316.914 6
 3 39 -2 1079.87 333.01 6
 3 39 2 799.677 187.773 6
 -3 39 -2 1002.03 369.58 6
 3 39 3 277.034 195.122 6
 3 39 -3 680.961 209.92 6
 -3 39 -3 512.207 279.636 6
 -3 39 -4 354.673 238.625 6
 3 39 -4 -395.079 376.105 6
 3 39 -5 -278.076 345.312 6
 -3 39 -5 322.576 226.807 6
 3 39 -6 1640.28 324.676 6
 -3 39 -6 2486.63 476.498 6
 -3 39 -7 247.573 261.668 6
 3 39 -7 -294.639 313.362 6
 3 39 -8 70.5122 238.16 6
 -3 39 -8 823.463 335.189 6
 3 39 -9 400.688 215.404 6
 3 39 -10 481.161 241.408 6
 3 39 -11 201.923 160.554 6
 3 41 0 397.308 182.843 6
 -3 41 0 1425.43 372.105 6
 3 41 -1 15249.8 1035.59 6
 -3 41 1 17466.4 1034.97 6
 3 41 1 15397.8 989.948 6
 -3 41 -1 16259.6 1023.45 6
 -3 41 -2 395.749 261.163 6
 3 41 -2 -453.815 342.265 6
 3 41 2 -126.619 194.119 6
 -3 41 -3 10779.8 860.435 6
 3 41 -3 11199.7 905.332 6
 3 41 -4 2015.34 337.922 6
 -3 41 -4 3142.73 483.438 6
 -3 41 -5 4349.38 544.979 6
 3 41 -5 4171.15 537.158 6
 -3 41 -6 3364.26 499.884 6
 3 41 -6 2948.31 437.353 6
 3 41 -7 6037.01 639.422 6
 -3 41 -7 6901.36 669.662 6
 3 41 -8 11218.6 844.299 6
 3 41 -9 180.544 156.021 6
 3 41 -10 6769.73 582.84 6
 3 41 -11 329.179 187.001 6
 3 43 0 -154.048 215.96 6
 3 43 -1 35020.8 1519.58 6
 3 43 1 34484.3 1427.01 6
 -3 43 -1 35067.8 1442.02 6
 3 43 2 3503.48 432.722 6
 -3 43 -2 3522.03 503.437 6
 3 43 -2 2581.34 423.991 6
 3 43 -3 11390.7 882.998 6
 -3 43 -3 9920.13 789.464 6
 -3 43 -4 5474.04 610.534 6
 3 43 -4 4609.58 559.633 6
 -3 43 -5 8586.23 724.416 6
 3 43 -5 7559.58 706.286 6
 3 43 -6 7723.06 712.2 6
 3 43 -7 6000.45 619.852 6
 3 43 -8 25833.3 1184.74 6
 3 43 -9 1738.6 317.35 6
 3 43 -10 12771.7 721.899 6
 3 45 0 95.4437 133.904 6
 3 45 -1 9718.05 753.333 6
 3 45 1 10105.5 724.232 6
 3 45 -2 538.272 206.448 6
 3 45 -3 8501.52 726.71 6
 3 45 -4 3002.74 438.482 6
 3 45 -5 6459.46 625.759 6
 3 45 -6 7639.19 664.97 6
 3 45 -7 4059.4 467.235 6
 3 45 -8 9942.98 674.822 6
 3 47 0 235.864 163.476 6
 3 47 -1 -46.9443 138.359 6
 3 47 -2 187.971 158.564 6
 3 47 -3 751.94 252.186 6
 3 47 -4 107.817 131.07 6
 3 47 -5 331.63 187.218 6
 3 47 -6 1802.57 311.383 6
 -4 0 0 606.78 143.48 2
 -4 0 -1 17618.4 634.127 2
 4 0 1 16151.8 585.756 2
 4 0 2 990228 4631.23 2
 -4 0 -2 998364 4413.13 2
 -4 0 -3 50961.2 1046.26 2
 4 0 3 59681 1110.41 2
 -4 0 -4 14447.8 602.471 2
 4 0 4 15273.1 565.198 2
 4 0 5 29973.6 862.184 2
 4 0 -5 30295.2 1095.16 1
 4 0 6 12003.9 576.78 2
 4 0 -6 12341.6 753.468 1
 4 0 -7 53750.6 1705.8 1
 4 0 7 56213.5 1334.58 2
 4 0 7 52121.3 1801.13 1
 4 0 -8 13225.2 911.724 1
 4 0 8 14663.5 731.316 2
 4 0 9 13411.7 742.78 2
 -4 0 -10 46.7142 115.714 3
 -4 0 -11 14317.2 782.857 3
 -4 0 -12 141.178 128.365 3
 4 0 12 276.173 266.064 5
 4 0 -12 4.7934 171.288 3
 -4 0 -13 26987.5 1175.32 3
 4 0 -13 28531.2 1434.45 3
 4 0 -14 8963.81 835.608 3
 4 0 14 10731.5 912.005 5
 -4 0 -14 8867.44 707.872 3
 4 0 -15 47867.1 1944.4 3
 -4 0 -15 46950.6 1627.66 3
 4 0 -16 37124.5 1707.7 3
 -4 0 -16 36285.8 1429.08 3
 4 0 -17 16714.4 1130.53 3
 -4 0 -17 17311.5 974.491 3
 4 0 -18 366.814 174.989 3
 4 0 -19 4632.19 535.571 3
 4 0 -20 3669.78 428.183 3
 -4 2 0 145221 1905.53 2
 -4 2 1 12709.5 583.838 2
 -4 -2 -1 12252.9 542.861 2
 -4 2 -2 6711.77 385.272 2
 4 2 2 6501.93 340.609 2
 4 -2 2 5985.46 376.614 2
 -4 2 -3 79520.5 1428.13 2
 4 2 3 79049.4 1287.91 2
 4 -2 3 78262.7 1283.05 2
 4 2 4 304520 2537.54 2
 -4 2 -4 298177 2880.85 2
 4 2 5 89778 1396.31 2
 4 -2 5 90522.7 1565.11 2
 4 2 -5 88041.5 1751.05 1
 4 -2 -5 90626.1 1961.38 1
 4 -2 6 21691.4 822.886 2
 4 2 -6 20800.1 952.675 1
 4 -2 -6 21131.2 1022.37 1
 4 2 6 21582.4 731.589 2
 4 2 6 19648.2 1005.33 1
 4 2 -7 3856.14 447.224 1
 4 -2 7 3483.59 365.659 2
 4 -2 -7 3475.49 455.214 1
 4 2 7 3105.04 451.588 1
 4 2 7 3653.94 331.111 2
 4 2 8 545.736 157.3 2
 4 -2 8 336.823 103.22 2
 4 -2 -8 121.599 132.982 1
 4 -2 9 4163.74 446.824 2
 -4 2 -9 3983.27 375.01 3
 -4 2 -10 172.919 108.031 3
 -4 -2 -10 376.215 138.552 3
 4 2 10 410.044 231.981 5
 -4 -2 -11 12786.4 729.398 3
 -4 2 -11 12071.2 723.128 3
 4 2 -11 13118.7 907.375 3
 4 2 11 15184 956.804 5
 -4 2 -12 1393.75 255.959 3
 -4 -2 -12 1582.68 291.453 3
 4 2 12 2333.42 466.252 5
 4 -2 -12 1786.76 368.409 3
 4 2 -12 1615.77 345.769 3
 -4 2 -13 18582.1 1001.08 3
 4 -2 -13 21018.6 1234.54 3
 -4 -2 -13 20389.1 1010.01 3
 4 2 -13 20351.8 1191.94 3
 4 -2 14 5869.39 683.265 5
 4 -2 -14 5902.94 691.827 3
 -4 2 -14 5591.93 578.532 3
 -4 -2 -14 6771.69 615.456 3
 4 2 -14 7008.75 741.223 3
 4 2 -15 18043.3 1183 3
 4 -2 15 20799.7 1277.15 5
 -4 2 -15 18140.2 1033.4 3
 -4 -2 -15 18293.7 1009.14 3
 4 -2 -15 18879.9 1221.97 3
 4 2 -16 12046 979.498 3
 4 -2 -16 11888.3 968.662 3
 -4 2 -16 12316 857.31 3
 -4 -2 -16 12389.2 825.485 3
 4 -2 -17 3853.45 554.802 3
 4 2 -17 4109.13 562.995 3
 -4 2 -17 3726.01 476.792 3
 -4 -2 -17 3993.73 459.381 3
 4 2 -18 15674.3 1044.86 3
 4 -2 -18 15528.6 1027.08 3
 4 -2 -19 50.6738 183.692 3
 4 2 -19 499.026 233.33 3
 4 2 -20 241.042 130.268 3
 4 -2 -20 206.344 117.642 3
 -4 4 0 104514 1552.08 2
 -4 4 -1 22328.7 711.583 2
 -4 4 1 21378.8 757.8 2
 -4 4 -2 77788.6 1392.01 2
 -4 4 2 76642 1496.29 2
 -4 4 3 3656.67 346.699 2
 -4 -4 -3 2602.23 210.611 2
 -4 4 -3 2935.61 302.603 2
 4 -4 3 2948.87 291.062 2
 4 4 4 59022.4 1042.82 2
 4 4 -4 60459 1243.06 1
 4 -4 4 57634.9 1268.24 2
 4 -4 5 8686.27 527.354 2
 4 4 5 9530.77 643.153 1
 4 4 -5 8477.71 530.963 1
 4 4 5 10373.5 479.984 2
 4 4 6 450.569 194.522 1
 4 4 6 626.914 143.692 2
 4 -4 -6 595.504 215.243 1
 4 4 -6 498.987 168.044 1
 4 -4 6 267.196 135.409 2
 4 4 7 12197.5 588.852 2
 4 -4 7 9690.53 623.44 2
 4 -4 -7 10594.3 809.467 1
 4 4 7 9636.29 775.582 1
 4 4 8 3968.69 366.489 2
 4 -4 8 2487.78 346.427 2
 4 -4 -8 3069.42 470.12 1
 4 -4 9 28325.5 1210.02 2
 -4 4 -9 28126.7 1019.47 3
 -4 -4 -10 488.936 169.361 3
 -4 4 -10 452.134 148.504 3
 4 4 -10 3.86463 205.67 3
 4 4 -11 3486.14 437.05 3
 -4 -4 -11 3345.96 378.464 3
 -4 4 -11 3426.18 393.003 3
 -4 4 -12 123.141 134.093 3
 4 4 -12 485.245 218.678 3
 -4 -4 -12 390.115 140.421 3
 4 -4 -13 188.985 203.128 3
 4 4 -13 195.794 188.821 3
 -4 -4 -13 49.5965 154.238 3
 -4 4 -13 20.2128 132.177 3
 -4 -4 -14 2700.36 379.039 3
 4 -4 -14 2453.11 437.795 3
 -4 4 -14 2313.98 383.697 3
 4 4 -14 2907.29 483.971 3
 4 -4 14 2457.11 479.135 5
 4 -4 -15 8592.62 822.92 3
 4 4 -15 8344.78 829.981 3
 -4 4 -15 8213.95 713.478 3
 -4 -4 -15 8290.13 649.173 3
 4 -4 15 5971.17 714.268 5
 4 -4 -16 6668.44 728.626 3
 4 4 -16 6689.41 738.828 3
 -4 4 -16 7226.93 681.334 3
 -4 -4 -16 6553.63 598.422 3
 4 -4 16 6414.05 723.084 5
 4 -4 -17 11214.4 917.789 3
 -4 4 -17 10824.3 806.886 3
 4 4 -17 10345.6 880.691 3
 -4 -4 -17 11644.2 762.125 3
 4 -4 -18 163.591 157.198 3
 4 4 -18 35.8948 191.135 3
 4 4 -19 1360.7 318.922 3
 4 -4 -19 1241.55 288.488 3
 4 4 -20 15043.9 777.291 4
 4 4 -20 15970.1 892.624 3
 4 -4 -20 13428.7 775.172 3
 -4 4 -20 14353.4 784.391 4
 -4 6 0 199624 2170.82 2
 4 -6 -1 910.053 201.53 2
 -4 6 -1 1073.02 188.864 2
 -4 6 1 1166.04 188.33 2
 -4 6 2 79372.5 1481.58 2
 -4 6 -2 78388.4 1500.55 2
 -4 6 3 69380.8 1493.18 2
 4 -6 3 69897.4 1407.39 2
 4 6 -3 71514.9 1081.38 1
 -4 6 -3 67449.5 1466.52 2
 4 6 -4 83071.9 1372.55 1
 4 -6 4 85691.2 1631.3 2
 -4 6 -4 80536.2 1704.14 2
 -4 6 4 82931.4 1721.53 2
 4 6 4 81793.6 1710.36 1
 -4 6 5 1960.24 280.387 2
 4 6 5 1625.17 280.348 1
 4 -6 5 1442.32 229.972 2
 -4 6 6 2368.71 318.836 2
 4 6 6 2083.58 348.169 1
 4 -6 -6 2357.39 371.178 1
 4 -6 6 2750.57 331.94 2
 4 -6 7 4235.72 439.394 2
 4 -6 -7 4440.31 550.157 1
 4 6 7 3954.41 501.631 1
 4 -6 8 892.101 231.238 2
 4 6 -9 125418 2427.5 3
 -4 6 -9 121997 2128.09 3
 4 6 -10 10392.8 737.509 3
 -4 6 -10 10121.1 664.687 3
 -4 -6 -10 9637.38 598.654 3
 4 6 -11 88491.5 2256.83 3
 -4 -6 -11 91177.8 1909.65 3
 -4 6 -11 86846.3 1991.01 3
 -4 6 -12 2478.04 370.243 3
 4 6 -12 2291.71 402.554 3
 -4 -6 -12 1693.06 287.33 3
 4 -6 -13 13992.9 1016.96 3
 4 6 -13 16469.8 1079.6 3
 -4 6 -13 13000.3 847.682 3
 -4 -6 -13 18152.6 922.417 3
 4 6 -14 4239.38 598.881 3
 4 -6 -14 3372.28 542.105 3
 -4 6 -14 3152.23 448.165 3
 -4 -6 -14 4070.85 454.047 3
 4 -6 15 285.967 284.824 5
 -4 6 -15 220.332 222.381 3
 4 6 -15 21.0173 202.648 3
 -4 -6 -15 -23.2884 135.744 3
 4 -6 -15 423.057 270.049 3
 4 -6 -16 12342 984.532 3
 4 6 -16 12055.2 965.436 3
 -4 6 -16 13326.8 918.72 3
 4 -6 16 11249.4 961.707 5
 4 6 -17 169.137 228.55 3
 4 -6 17 47.1983 174.559 5
 4 -6 -17 45.8687 173.447 3
 4 -6 -18 6508.48 653.56 3
 4 6 -18 7692.58 737.849 3
 4 6 -19 6561.65 572.673 4
 4 -6 -19 5918.69 563.054 3
 4 6 -19 6386.9 648.472 3
 -4 6 -20 27308.6 1047.81 4
 4 6 -20 25584 993.018 4
 4 6 -20 27368.7 1163.51 3
 4 -6 -20 23970.2 993.106 3
 -4 8 0 483800 3552.77 2
 4 -8 0 501861 3872.35 2
 -4 8 1 13059.6 573.747 2
 4 -8 -1 13466.5 677.401 2
 -4 8 -1 14939 663.742 2
 4 8 1 13047.3 426.902 1
 4 8 -2 19840.7 372.384 1
 -4 8 -2 19282.4 795.177 2
 -4 8 2 20295.8 718.306 2
 4 8 2 20897.9 663.083 1
 4 8 3 345.657 119.546 1
 -4 8 3 574.75 143.14 2
 -4 -8 -3 355.334 87.4895 2
 4 -8 3 470.213 141.736 2
 -4 8 -3 455.239 149.036 2
 4 -8 4 44279.8 1253.36 2
 -4 -8 -4 43855.8 620.119 2
 4 8 4 43920.8 1261.55 1
 -4 8 4 44677.8 1232.31 2
 4 -8 5 19162.8 868.925 2
 -4 8 5 19089.2 875.065 2
 4 8 5 17250.5 871.761 1
 4 8 6 1733.12 336.177 1
 -4 8 6 1559.63 290.323 2
 4 -8 -6 1791.25 351.221 1
 4 -8 6 1820.74 297.17 2
 4 -8 -7 9602.2 802.313 1
 4 8 7 9710.3 801.288 1
 4 -8 7 9850.79 706.716 2
 -4 8 7 10150.2 724.792 2
 -4 8 8 7861.6 668.815 2
 4 -8 8 6664.32 630.185 2
 4 8 -8 7387.44 563.785 3
 -4 8 -8 7052.78 497.653 3
 4 8 -9 44961.5 1447.76 3
 -4 8 -9 42327.5 1317.79 3
 -4 8 -10 383.785 220.83 3
 4 8 -10 285.725 163.197 3
 4 8 -11 189744 3293.91 3
 -4 8 -11 182261 2984 3
 4 8 -12 4104.84 557.165 3
 -4 8 -12 3521.49 479.695 3
 -4 8 -13 10153.9 754.75 3
 4 8 -13 11814.1 912.709 3
 4 -8 -14 312.235 199.859 3
 -4 8 -14 384.755 212.643 3
 4 8 -14 772.043 363.688 3
 4 -8 -15 4455.57 591.69 3
 -4 8 -15 4539.58 558.126 3
 4 8 -15 4493.44 624.996 3
 4 -8 15 4906.84 672.885 5
 4 8 -16 2582.54 464.904 3
 4 -8 -16 2852.21 463.685 3
 4 -8 16 2914.38 504.331 5
 -4 8 -16 2759.1 435.728 3
 4 -8 -17 6199.02 661.199 3
 4 8 -17 5238.95 624.609 3
 4 -8 17 5904.48 719.605 5
 4 -8 18 29383.2 1426.37 5
 4 -8 -18 27178 1288.4 3
 4 8 -18 30821.1 1452.09 3
 4 -8 -19 3812.96 433.312 3
 4 8 -19 4201.94 456.738 4
 -4 8 -19 4067.82 454.774 4
 4 8 -19 3987.33 503.01 3
 4 8 -20 28745.2 1178.56 3
 4 8 -20 28425 1022.51 4
 -4 8 -20 29208.7 1066.26 4
 4 -8 -20 26805.6 1003.35 3
 4 -10 0 137909 2087.95 2
 -4 10 0 131999 2002.39 2
 4 -10 1 1417.17 235.264 2
 4 10 1 1346.19 136.569 1
 -4 10 1 969.311 182.301 2
 -4 10 -1 1384.3 235.295 2
 4 -10 -1 1115.06 251.47 2
 -4 10 2 54293.3 1194.75 2
 4 -10 -2 56037.1 1424.15 2
 4 10 2 58919.5 1105.84 1
 4 -10 2 58361.8 1390.32 2
 -4 10 -2 51376.6 1345.51 2
 -4 10 -3 40481 1267.6 2
 -4 10 3 43273.5 1089.34 2
 4 -10 3 43066.1 1231.46 2
 4 -10 4 22277.7 936.774 2
 -4 10 4 22923.6 820.759 2
 4 10 4 22803.9 916.991 1
 4 10 5 1143.54 249.972 1
 4 -10 5 839.078 222.193 2
 -4 10 5 1150.51 201.341 2
 4 -10 6 3794.65 434.003 2
 4 -10 -6 4246.19 536.679 1
 -4 10 6 3113.62 350.241 2
 4 10 6 4540.79 503.062 1
 4 10 7 5115.76 587.889 1
 4 -10 7 4052.38 476.537 2
 -4 10 7 4395.91 448.793 2
 -4 10 -8 626 188.267 3
 4 10 -8 707.059 192.166 3
 4 10 -9 95081.5 2107.57 3
 -4 10 -9 92695.5 1955.47 3
 4 10 -10 676.212 240.377 3
 -4 10 -10 579.435 233.34 3
 4 10 -11 175043 3174.75 3
 -4 10 -11 175782 2920.65 3
 -4 10 -12 5450.91 570.062 3
 4 10 -12 5714.09 624.899 3
 -4 10 -13 14132.1 906.284 3
 4 10 -13 16324.3 1076.96 3
 4 -10 -14 4851.26 607.443 3
 4 10 -14 5736.44 683.436 3
 -4 10 -14 5005 563.341 3
 4 -10 15 505.579 352.283 5
 4 10 -15 275.101 196.777 3
 -4 10 -15 284.994 232.021 3
 4 -10 -15 332.338 217.195 3
 4 10 -16 710.419 258.015 3
 4 -10 16 905.33 355.475 5
 4 -10 -16 469.163 170.088 3
 4 10 -17 5324.68 644.131 3
 4 -10 17 5225.55 682.344 5
 4 10 -17 4456.66 496.351 4
 4 -10 -17 5195.23 575.58 3
 4 10 -18 8293.84 645.692 4
 4 -10 -18 8268.58 684.34 3
 -4 10 -18 8643.62 669.504 4
 4 10 -18 9579.81 806.361 3
 4 -10 18 9441.6 830.294 5
 4 10 -19 3119.5 380.333 4
 -4 10 -19 3904.66 422.438 4
 4 10 -19 3906.98 487.469 3
 4 -10 -19 3024.03 372.936 3
 4 10 -20 38695 1331.79 3
 4 10 -20 37272.7 1153.04 4
 -4 10 -20 37889.9 1192.14 4
 4 -12 0 106741 1959.77 2
 -4 12 0 96530.7 1817.39 2
 4 -12 1 11681.2 644.375 2
 4 -12 -1 10135.7 649.372 2
 -4 12 1 10169.3 591.083 2
 -4 12 -1 10183 617.67 2
 -4 12 2 104.245 93.5399 2
 4 -12 2 149.712 118.253 2
 -4 12 -2 198.807 124.365 2
 4 -12 -2 58.2263 133.474 2
 -4 -12 -3 268.423 81.1626 2
 4 -12 3 283.094 128.411 2
 -4 12 3 297.221 117.731 2
 -4 12 4 272.721 109.533 2
 4 -12 4 236.883 129.16 2
 4 -12 5 3985.25 447.698 2
 -4 12 5 4511.01 389.491 2
 4 -12 -6 83417.1 2385.33 1
 4 -12 6 86631.2 2164.94 2
 -4 12 -7 19894.4 844.469 3
 4 12 -8 4957.13 466.449 3
 -4 12 -8 5771.78 491.929 6
 -4 12 -8 5097.06 453.984 3
 4 12 -9 86386.9 2033.74 3
 -4 12 -9 84147.6 1909.6 3
 4 12 -10 10622 765.684 3
 -4 12 -10 10153.2 710.582 3
 4 12 -11 20501.3 1094.06 3
 -4 12 -11 20648.5 1056.37 3
 4 12 -12 542.097 248.707 3
 -4 12 -12 694.832 247.103 3
 4 12 -13 2640.29 462.197 3
 -4 12 -13 2176.81 369.419 3
 4 12 -14 823.903 266.575 3
 -4 12 -14 746.101 201.297 3
 4 -12 -14 710.979 207.286 3
 4 -12 15 4391.78 637.473 5
 4 -12 -15 3945.48 533.009 3
 4 12 -15 4358.66 574.267 3
 4 -12 16 1484.8 446.652 5
 4 -12 -16 1583.15 328.665 3
 4 12 -16 1268.21 282.088 4
 -4 12 -16 1278.42 290.927 4
 4 12 -16 1339.14 346.065 3
 4 -12 -17 -56.6509 179.61 3
 4 12 -17 -279.198 246.306 4
 -4 12 -17 -255.652 249.54 4
 4 -12 17 341.915 262.784 5
 4 12 -17 1.08492 191.307 3
 4 -12 -18 2014.47 330.963 3
 4 12 -18 1996.41 308.148 4
 4 -12 18 2931.41 479.517 5
 -4 12 -18 2346.28 331.213 4
 4 12 -18 2723.98 415.565 3
 4 -12 -19 358.533 120.979 3
 4 12 -19 631.18 179.256 4
 -4 12 -19 508.239 171.618 4
 4 12 -19 446.878 179.528 3
 4 -12 19 508.838 204.585 5
 -4 12 -20 5682.8 453.61 4
 4 12 -20 5090.22 421.623 4
 4 -14 0 72021.6 1697.64 2
 -4 14 0 64236.3 1577.75 2
 -4 14 -1 424.944 149.628 2
 4 -14 1 569.236 183.827 2
 -4 14 1 390.424 135.712 2
 4 -14 -1 619.961 203.033 2
 4 -14 2 3266.45 375.838 2
 -4 14 2 2994.93 343.139 2
 4 -14 -2 3221.81 410.977 2
 -4 -14 -3 7016.8 302.991 2
 -4 14 3 6818.13 503.047 2
 4 -14 3 5713.48 506.215 2
 4 -14 4 40644 1393.76 2
 -4 14 4 43229 1236.77 2
 4 -14 5 139621 2761.41 2
 -4 14 5 114041 2003.56 2
 -4 14 6 29498.7 1014.54 2
 4 14 -7 20211.3 879.62 3
 -4 14 -7 20233.4 823.706 4
 4 14 -7 19675.6 784.384 4
 -4 14 -7 20135.4 876.425 6
 -4 14 -8 400.678 167.199 3
 4 14 -8 277.643 92.417 6
 4 14 -8 431.405 171.974 3
 -4 14 -8 545.475 204.52 6
 -4 14 -9 23100.5 1039.32 6
 4 14 -9 21042.7 1011.41 3
 -4 14 -9 19787.8 960.513 3
 -4 14 -10 885.118 263.551 3
 4 14 -10 945.057 240.52 3
 4 14 -11 5580.94 574.539 3
 -4 14 -11 5999.84 590.741 3
 4 14 -12 964.506 266.797 3
 -4 14 -12 1242.82 321.146 3
 -4 14 -13 11328.8 823.004 3
 4 14 -13 11609.3 895.566 3
 4 -14 -14 16287.5 1078.39 3
 -4 14 -14 16166.6 1028.35 4
 4 14 -14 14937.6 1043.45 3
 4 14 -14 16425.4 1011.86 4
 4 -14 -15 10737.8 857.439 3
 -4 14 -15 11303.5 843.815 4
 4 14 -15 10711.9 888.656 3
 4 14 -15 11648 826.692 4
 4 14 -16 20067.9 1208.8 3
 4 14 -16 18835.2 1022.38 4
 -4 14 -16 19963.9 1082.29 4
 4 -14 -16 21193.4 1166.09 3
 4 -14 16 20423.8 1337.13 5
 4 -14 -17 5069.99 539.45 3
 -4 14 -17 5163.42 534.221 4
 4 14 -17 5365.13 612.827 3
 4 14 -17 4812.58 507.172 4
 4 -14 17 5892.01 722.308 5
 4 14 -18 309.92 142.255 4
 -4 14 -18 472.836 188.714 4
 4 14 -18 558.518 232.147 3
 4 -14 18 694.021 325.118 5
 4 -14 -18 461.608 128.489 3
 4 14 -19 222.244 146.83 3
 4 -14 19 -168.76 203.615 5
 4 14 -19 -22.986 120.594 4
 -4 14 -19 28.2806 99.0887 4
 -4 16 0 16817.7 870.419 2
 4 -16 0 18203.7 912.374 2
 4 -16 1 118.906 122.986 2
 4 -16 -1 169.991 169.789 2
 -4 16 1 252.365 116.996 2
 4 -16 -2 346.996 177.099 2
 4 -16 2 358.22 168.81 2
 -4 16 2 234.932 95.2337 2
 4 -16 -3 11595.1 733.659 2
 4 -16 3 11333.4 746.235 2
 -4 -16 -3 10727.4 393.777 2
 -4 16 3 11637.3 697.167 2
 4 -16 4 354138 4360.89 2
 -4 16 4 396251 4019.86 2
 -4 16 -5 103653 1947.55 6
 -4 16 5 115047 2149.82 2
 4 16 -6 74280.4 1741.24 6
 -4 16 -6 75826.9 1710.51 6
 4 16 -6 72376.5 1479.34 4
 -4 16 -6 77768 1585.57 4
 4 16 -7 71589.7 1758.89 6
 4 16 -7 71069.7 1529.05 4
 -4 16 -7 74334.7 1626.23 4
 -4 16 -7 73639.1 1705.8 6
 4 16 -7 77830.3 1753.41 3
 4 16 -8 724.363 210.656 3
 4 16 -8 705.384 171.114 6
 4 16 -8 599.431 156.378 4
 -4 16 -8 554.183 139.807 4
 -4 16 -8 973.912 255.249 6
 -4 16 -9 8032.59 618.217 6
 4 16 -9 8298.35 597.221 4
 -4 16 -9 7615.57 588.933 4
 4 16 -9 7672.65 627.539 3
 4 16 -9 7151.56 565.203 6
 4 16 -10 926.856 251.308 3
 4 16 -10 1202.43 279.959 4
 -4 16 -10 1225.24 278.58 4
 4 16 -11 1023.48 245.401 4
 -4 16 -11 879.432 219.732 4
 4 16 -11 841.53 198.358 3
 4 16 -12 685.667 223.102 4
 -4 16 -12 449.871 194.968 4
 4 16 -12 571.856 193.342 3
 -4 16 -13 38616 1534.28 4
 4 16 -13 37790.6 1518.56 4
 4 16 -13 37277.3 1583.01 3
 4 16 -14 6139.22 669.712 3
 -4 16 -14 6497.43 656.073 4
 4 16 -14 6163.06 636.671 4
 4 -16 -14 6226.93 655.587 3
 4 -16 -15 58337.9 1971.43 3
 4 16 -15 55907.2 1803.69 4
 -4 16 -15 54183.1 1821.71 4
 4 16 -15 53572.9 1932.01 3
 -4 16 -16 26023.4 1227.3 4
 4 16 -16 25518.9 1181.04 4
 4 -16 16 26503.9 1531.79 5
 4 -16 -16 28731.8 1340.45 3
 4 16 -16 26445.8 1333.48 3
 4 -16 17 21461.5 1316.79 5
 4 16 -17 18746.3 975.328 4
 -4 16 -17 19859.2 1026.76 4
 4 16 -17 20446.2 1137.15 3
 4 -16 -17 20628.2 1062.17 3
 4 -16 18 17482.8 1118.52 5
 4 16 -18 16818.9 880.216 4
 -4 16 -18 17951.1 920.653 4
 4 16 -18 17360.2 980.47 3
 -4 16 -19 94.3555 94.167 4
 4 16 -19 102.404 113.7 4
 4 -16 19 50.9696 164.712 5
 4 -18 0 1753.33 333.462 2
 4 -18 -1 1691.89 317.21 2
 -4 18 1 1275.05 255.922 2
 4 -18 1 1463.13 298.434 2
 4 -18 2 17371.5 949.199 2
 -4 -18 -2 17073.6 681.262 2
 4 -18 -2 16696.1 1015.8 2
 -4 18 2 16511.8 895.532 2
 4 -18 3 44685 1568.57 2
 4 -18 -3 46149.3 1538.7 2
 -4 18 3 48376.4 1509.46 2
 -4 18 -4 148027 2374.55 6
 -4 18 4 151298 2597.97 2
 4 18 -4 145619 2428.95 6
 -4 18 -5 167733 2596.12 6
 -4 18 -5 162654 2311.75 4
 4 18 -5 161235 2625.32 6
 4 18 -5 158596 2265.66 4
 -4 18 -6 68267.6 1588.53 4
 4 18 -6 64419 1705.99 6
 -4 18 -6 67156 1672.55 6
 4 18 -6 65257.4 1509.57 4
 4 18 -7 67878.4 1777.51 6
 -4 18 -7 70644 1655.25 4
 4 18 -7 67392.1 1563.1 4
 -4 18 -7 66601.1 1708.54 6
 4 18 -7 72619.6 1721.27 3
 4 18 -8 13949.8 818.042 6
 -4 18 -8 14446.5 824.152 6
 4 18 -8 15248.4 844.559 3
 4 18 -8 14307.2 752.862 4
 -4 18 -8 14740.9 797.55 4
 -4 18 -9 399.416 217.451 6
 4 18 -9 519.982 216.633 3
 4 18 -9 302.413 153.292 4
 4 18 -9 510.492 182.328 6
 -4 18 -9 288.809 163.183 4
 4 18 -10 238.247 158.868 3
 -4 18 -10 623.339 261.876 6
 4 18 -10 671.585 235.84 4
 -4 18 -10 215.686 172.068 4
 4 18 -10 391.089 200.559 6
 4 18 -11 2809.47 417.197 3
 -4 18 -11 2247.97 370.579 4
 4 18 -11 2558.63 384.022 4
 4 18 -12 1755.6 366.997 3
 4 18 -12 1560.17 318.102 4
 -4 18 -12 1313.24 301.81 4
 4 18 -13 20810.6 1144.78 4
 -4 18 -13 21023 1144.38 4
 4 18 -13 21194.4 1201.28 3
 4 18 -14 13022.7 908.091 4
 -4 18 -14 13193.8 919.798 4
 4 -18 -14 13115.6 940.878 3
 4 18 -14 13339.4 960.59 3
 4 -18 -15 40523.2 1616.08 3
 -4 18 -15 36271.9 1488.21 4
 4 18 -15 36457.5 1466.21 4
 4 18 -15 35183.9 1547.28 3
 4 -18 15 36549.8 1821.75 5
 -4 18 -16 31323.4 1349.5 4
 4 18 -16 31032.7 1404.85 3
 4 18 -16 30458.2 1302.3 4
 4 -18 16 30759.6 1644.84 5
 4 18 -17 15640 883.127 4
 -4 18 -17 17060.5 956.658 4
 4 18 -17 17155.6 1003.3 3
 4 -18 17 16977.8 1171.06 5
 4 -18 18 11451.4 892.124 5
 4 18 -18 10383.9 657.269 4
 -4 18 -18 11230.3 703.763 4
 4 -18 19 2194.28 372.925 5
 -4 18 -19 1603.54 261.831 4
 4 18 -19 1612.84 258.919 4
 4 20 0 197365 2782.96 6
 4 -20 0 192879 3353.9 2
 -4 -20 0 194025 3090.58 2
 4 -20 -1 1870.22 362.352 2
 -4 20 -1 1813.78 272.133 6
 4 -20 1 1652.94 329.464 2
 -4 -20 -1 2101.36 312.288 2
 4 20 -1 1699.18 275.701 6
 4 -20 -2 97490.3 2571.29 2
 4 20 -2 99058.3 2030.81 6
 -4 20 -2 99523.9 1742.98 4
 4 20 -2 99808.6 1731.16 4
 -4 20 -2 103086 2048.33 6
 4 20 -3 17287.1 868.55 6
 4 20 -3 18349.3 769.521 4
 4 -20 -3 17946.2 1007.08 2
 -4 20 -3 17431.7 731.388 4
 -4 20 -3 18683.2 872.466 6
 4 20 -4 78500.8 1642.84 4
 -4 20 -4 73527.6 1565.67 4
 4 20 -4 74995.4 1835.19 6
 -4 20 -4 76022.3 1796.03 6
 4 20 -5 32697 1244.05 6
 -4 20 -5 33480.7 1230.75 6
 4 20 -5 32339.4 1076.28 4
 -4 20 -5 33893.3 1100.85 4
 4 20 -6 42384 1253.19 4
 -4 20 -6 44934.8 1325.2 4
 -4 20 -6 43868.9 1433.73 6
 4 20 -6 43708.4 1470.59 6
 -4 20 -7 30866.7 1202.76 6
 4 20 -7 32291.9 1282.98 6
 -4 20 -7 32188.7 1177.79 4
 4 20 -7 30337.8 1106.76 4
 4 20 -7 34996.2 1225.72 3
 4 20 -8 683.044 140.606 6
 -4 20 -8 857.286 257.872 6
 4 20 -8 667.459 211.507 3
 -4 20 -8 701.979 204.647 4
 4 20 -8 584.88 182.665 4
 4 20 -9 686.656 214.081 4
 -4 20 -9 794.817 237.156 4
 -4 20 -9 1053.94 285.754 6
 4 20 -9 482.68 181.574 6
 4 20 -9 743.756 233.436 3
 4 20 -10 975.839 272.311 4
 4 20 -10 1077.13 295.997 3
 -4 20 -10 1613.76 361.871 6
 4 20 -10 1361.98 300.466 6
 -4 20 -10 1050.41 270.985 4
 4 20 -11 280.203 176.519 4
 -4 20 -11 348.716 143.329 4
 4 20 -11 419.981 251.239 3
 4 20 -12 349.844 244.532 3
 4 20 -12 15.238 161.621 4
 -4 20 -12 163.265 158.252 4
 4 20 -13 16865.4 1055.24 4
 -4 20 -13 18559.2 1101.13 4
 4 20 -13 17434.3 1082.19 3
 4 20 -14 2163.73 389.019 4
 -4 20 -14 2374.52 423.532 4
 4 20 -14 1471.41 341.612 3
 -4 20 -15 42241.6 1626.62 4
 4 -20 15 42915.4 1964.32 5
 4 20 -15 39270.3 1584.06 3
 4 20 -15 42517.3 1597.61 4
 4 -20 16 29382.4 1594.42 5
 4 20 -16 26766 1214.91 4
 4 20 -16 27523.6 1291.78 3
 -4 20 -16 27574.3 1254.89 4
 4 20 -17 6009.82 535.523 4
 4 -20 17 6399.36 724.839 5
 -4 20 -17 6412.86 573.683 4
 4 -20 18 3756.82 503.433 5
 -4 20 -18 3688.04 414.695 4
 4 20 -18 3102.26 348.782 4
 -4 -22 0 172948 3017.71 2
 4 -22 0 173874 3374.74 2
 4 22 0 181497 2813.07 6
 4 22 -1 6735.3 552.798 6
 4 -22 -1 8087.28 771.68 2
 -4 22 -1 7014.57 541.369 6
 4 22 1 7981.4 592.914 6
 -4 -22 1 6208.67 614.957 2
 -4 22 1 8178.7 556.249 6
 4 22 2 14048.8 773.777 6
 -4 22 -2 13390.8 677.902 4
 -4 -22 2 12116.1 905.934 2
 4 -22 -2 12917.7 976.564 2
 -4 22 -2 14455.4 789.776 6
 -4 22 2 13758.4 714.147 6
 4 22 -2 13603.2 688.884 4
 4 22 -2 13769 799.918 6
 -4 22 -3 5701.51 442.995 4
 -4 22 -3 5829.71 518.03 6
 4 22 -3 5648.87 452.807 4
 4 22 -3 5670.09 526.657 6
 4 22 3 5848.62 500.846 6
 -4 22 -4 34440 1271.81 6
 -4 22 -4 34812.7 1126.46 4
 4 22 -4 34309.1 1304.75 6
 4 22 4 34348.8 1189.89 6
 4 22 -4 34797.6 1143.9 4
 4 22 -5 16534 808.405 4
 -4 22 -5 17062.1 912.182 6
 4 22 -5 15960.8 905.386 6
 -4 22 -5 15715.2 794.857 4
 4 22 -6 4499.17 486.305 6
 -4 22 -6 4757.19 498.452 6
 4 22 -6 4742.21 455.838 4
 -4 22 -6 4575.19 452.049 4
 4 22 -7 191.122 141.836 3
 4 22 -7 381.265 155.519 4
 -4 22 -7 320.014 175.746 4
 -4 22 -7 694.553 216.576 6
 4 22 -7 65.8112 156.885 6
 -4 22 -8 2363.4 386.648 6
 -4 22 -8 1812.34 325.07 4
 4 22 -8 2239.05 328.572 4
 4 22 -8 2306.29 369.434 6
 4 22 -8 2054.44 341.239 3
 4 22 -9 3358.49 438.609 4
 4 22 -9 3279.99 434.378 6
 -4 22 -9 3259.28 466.021 6
 -4 22 -9 2480.18 390.899 4
 4 22 -9 2241.01 366.591 3
 4 22 -10 1419.23 380.049 6
 -4 22 -10 1416.56 436.921 6
 4 22 -10 936.915 269.342 4
 -4 22 -10 713.973 244.507 4
 4 22 -10 800.994 270.825 3
 4 22 -11 56651.3 1802.06 6
 4 22 -11 55327.8 1847.47 4
 -4 22 -11 49122.2 1759.92 4
 4 22 -11 45080.2 1700.39 3
 4 22 -12 938.03 292.355 4
 -4 22 -12 959.463 275.961 4
 4 22 -12 1309.34 321.781 3
 4 22 -13 12491.9 907.016 4
 4 22 -13 13335.1 952.541 3
 -4 22 -13 13070.8 928.526 4
 4 22 -14 2294.32 391.281 3
 4 22 -14 2527.8 403.05 4
 -4 22 -14 1951.96 354.198 4
 4 22 -15 5494.77 572.672 4
 -4 22 -15 5558.31 582.716 4
 4 -22 15 5789.68 765.199 5
 4 22 -16 2091.29 356.793 4
 -4 22 -16 2051.57 346.606 4
 4 -22 16 2081.66 465.948 5
 4 -22 17 2271.3 439.621 5
 4 22 -17 2439.34 335.766 4
 -4 22 -17 2087.96 309.914 4
 4 22 -18 -218.241 143.885 4
 -4 22 -18 -205.196 158.079 4
 4 -22 18 -32.5558 141.483 5
 4 24 0 149452 2682.83 6
 -4 24 0 154321 2622.31 6
 4 24 -1 833.83 240.816 6
 4 24 1 1103.19 273.164 6
 -4 24 1 651.876 154.47 6
 -4 24 -1 331.224 159.102 6
 -4 24 -2 63295.1 1747.91 6
 4 24 -2 60778 1765.34 6
 -4 24 2 62890.1 1600.84 6
 4 24 2 62218.1 1702.83 6
 -4 24 -3 -145.8 220.818 6
 4 24 -3 117.119 131.734 4
 4 24 -3 205.302 174.37 6
 4 24 3 66.5113 102.588 6
 -4 24 3 326.472 164.81 6
 -4 24 -3 359.696 144.009 4
 4 24 -4 2185.67 303.249 4
 4 24 -4 1986.51 328.756 6
 -4 24 -4 2002.14 322.714 6
 -4 24 -4 2283.92 312.159 4
 4 24 4 2015.9 301.289 6
 4 24 -5 2450.74 324.336 6
 4 24 -5 2922.69 358.597 4
 -4 24 -5 3293.9 394.707 4
 -4 24 -5 3055.58 404.257 6
 4 24 -6 478.199 142.661 6
 4 24 -6 952.86 243.67 4
 -4 24 -6 560.286 173.382 6
 -4 24 -6 870.025 229.519 4
 -4 24 -7 22198.9 1050.5 4
 4 24 -7 19673.3 941.849 4
 4 24 -7 20479.8 1112.44 6
 -4 24 -7 19868.3 1057 6
 4 24 -8 3449.01 427.071 4
 -4 24 -8 4154.77 512.356 6
 -4 24 -8 3875.95 462.017 4
 4 24 -8 3776.56 496.275 6
 -4 24 -9 88416.3 2238.53 6
 4 24 -9 95530.5 2277.19 3
 4 24 -9 90179.6 2388.78 6
 -4 24 -9 97998.7 2338.41 4
 4 24 -10 1521.93 347.922 3
 4 24 -10 1978.56 435.945 6
 4 24 -10 2077.25 415.174 4
 -4 24 -10 2463.56 491.45 6
 -4 24 -10 1587.78 359.697 4
 4 24 -11 8287.74 700.473 6
 -4 24 -11 8307.22 736.905 4
 4 24 -11 6651.44 682 3
 4 24 -11 8317.42 735.897 4
 4 24 -12 2112.46 417.03 4
 -4 24 -12 2593.37 483.878 4
 4 24 -12 1970.27 401.081 3
 4 24 -13 4894.32 580.698 4
 -4 24 -13 4553.68 529.176 4
 4 24 -14 432.308 169.719 4
 -4 24 -14 317.133 168.129 4
 4 24 -15 642.551 196.571 4
 -4 24 -15 794.024 234.524 4
 4 -24 15 757.933 344.937 5
 4 24 -16 138.715 135.488 4
 -4 24 -16 -13.2238 136.844 4
 4 -24 16 -6.69494 211.752 5
 4 24 -17 359.825 142.088 4
 -4 24 -17 347.809 107.344 4
 4 -24 17 610.651 271.711 5
 4 -24 18 2392.66 364.846 5
 4 24 -18 2344.26 276.563 4
 -4 24 -18 2587.2 302.536 4
 -4 26 0 278708 3676.02 6
 4 26 0 265626 3765.12 6
 -4 26 1 13187.4 791.533 6
 4 26 -1 11631.9 800.018 6
 4 26 1 12646.7 815.546 6
 -4 26 -1 12103.4 770.101 6
 -4 26 -2 74813.7 1974.23 6
 4 26 2 71468.6 1912.05 6
 -4 26 2 72673 1799.44 6
 4 26 -2 72110.9 1997.62 6
 4 26 -3 12874.5 856.37 6
 4 26 3 14532.8 863.86 6
 -4 26 3 14664 796.672 6
 -4 26 -3 13473.9 840.82 6
 4 26 -4 4129.36 481.867 6
 -4 26 -4 4726.44 467.11 4
 4 26 4 4937.74 488.605 6
 4 26 -4 4988.95 463.592 4
 -4 26 -4 4462.25 498.948 6
 4 26 -5 2962.93 418.485 6
 -4 26 -5 3487.25 444.741 6
 4 26 -5 3317.01 388.896 4
 -4 26 -5 3377.6 411.295 4
 -4 26 -6 -259.233 255.312 6
 -4 26 -6 174.567 126.488 4
 4 26 -6 16.2519 198.158 6
 4 26 -6 32.1579 132.888 4
 -4 26 -7 4064.07 476.745 4
 -4 26 -7 3454.5 488.88 6
 4 26 -7 4236.38 462.559 4
 4 26 -7 3401.01 484.791 6
 4 26 -8 12784.1 935.27 6
 -4 26 -8 13351.8 870.338 4
 -4 26 -8 12279.5 903.363 6
 4 26 -8 14818.9 882.518 4
 -4 26 -9 74635.6 2099.93 4
 -4 26 -9 66658.5 2021.28 6
 4 26 -9 88154.3 2208.85 4
 4 26 -9 86102.4 2398.4 6
 -4 26 -10 3244.69 532.968 6
 4 26 -10 3360.67 528.844 6
 -4 26 -10 3429.34 527.122 4
 4 26 -10 3346.91 512.269 4
 4 26 -11 120187 2791.29 6
 4 26 -11 117206 2749.42 4
 -4 26 -11 119225 2771.82 4
 4 26 -12 1672.41 342.647 4
 -4 26 -12 1564.59 343.81 4
 4 26 -13 43211.9 1659.89 4
 -4 26 -13 41022.8 1625.18 4
 4 -26 14 3948.68 667.647 5
 4 26 -14 3516.66 482.613 4
 -4 26 -14 3435.4 470.101 4
 -4 26 -15 4315.67 498.179 4
 4 -26 15 4341.02 667.673 5
 4 26 -15 4285.14 479.133 4
 4 26 -16 217.055 161.643 4
 -4 26 -16 80.5169 142.223 4
 4 -26 16 165.004 223.305 5
 -4 26 -17 345.886 128.616 4
 4 26 -17 420.605 135.922 4
 4 -26 17 540.166 239.467 5
 -4 28 0 87137.4 2149.81 6
 4 28 0 84905.4 2222.61 6
 4 28 1 292.467 134.768 6
 -4 28 1 514.469 203.282 6
 4 28 -1 244.254 159.063 6
 -4 28 -1 62.9285 222.9 6
 -4 28 -2 44330.4 1573.09 6
 4 28 2 44118.2 1559.86 6
 -4 28 2 46369.6 1483.64 6
 4 28 -2 42668.4 1611.15 6
 4 28 -3 968.474 250.262 6
 4 28 3 944.153 207.884 6
 -4 28 3 1169.44 264.988 6
 -4 28 -3 850.606 199.31 6
 -4 28 -4 1678.75 332.836 6
 -4 28 -4 1927.85 299.205 4
 4 28 -4 1046.92 269.903 6
 4 28 4 1019.37 230.588 6
 4 28 -5 222.928 131.985 4
 -4 28 -5 55.0435 178.281 6
 4 28 -5 221.384 214.28 6
 -4 28 -5 201.514 172.102 4
 4 28 -6 1410 277.13 4
 -4 28 -6 1085.58 249.302 4
 4 28 -6 957.991 289.214 6
 -4 28 -6 993.579 295.28 6
 4 28 -7 5681.02 529.195 4
 -4 28 -7 5606.43 553.951 4
 -4 28 -7 5291.05 620.48 6
 4 28 -7 4972.91 606.003 6
 -4 28 -8 2243.71 468.015 6
 -4 28 -8 2217.35 370.395 4
 4 28 -8 2029.8 410.45 6
 4 28 -8 2543.06 383.966 4
 4 28 -9 34798 1410.49 4
 -4 28 -9 34408.8 1485.53 6
 -4 28 -9 35609.7 1468.78 4
 4 28 -9 33352 1542.78 6
 4 28 -10 1608.14 392.016 4
 -4 28 -10 1730.6 400.719 4
 4 28 -10 1345.45 370.759 6
 -4 28 -10 1987.4 464.58 6
 4 28 -11 68406.3 2101.59 4
 -4 28 -11 67686.2 2087.87 4
 4 28 -11 65364.4 2078.48 6
 -4 28 -12 667.343 259.199 4
 4 28 -12 537.829 244.933 4
 4 28 -12 526.845 207.051 6
 -4 28 -13 4184.13 514.388 4
 4 -28 13 3717.13 648.13 5
 4 28 -13 3939.54 499.207 4
 4 28 -14 861.668 252.982 4
 -4 28 -14 1123.49 271.559 4
 4 -28 14 1551.45 474.542 5
 4 -28 15 100.014 220.504 5
 -4 28 -15 333.245 182.638 4
 4 28 -15 439.41 200.286 4
 4 28 -16 378.087 157.685 4
 -4 28 -16 609.409 198.245 4
 4 -28 16 678.523 295.227 5
 -4 28 -17 262.003 108.73 4
 4 -28 17 555.743 222.047 5
 -4 30 0 34982.4 1423.35 6
 4 30 0 32860.5 1431.23 6
 4 30 1 948.092 233.246 6
 4 30 -1 868.773 245.974 6
 -4 30 1 868.411 263.496 6
 -4 30 -1 1308.56 313.962 6
 -4 30 -2 8616.55 745.097 6
 4 30 -2 8232.72 733.8 6
 4 30 2 8505.81 717.693 6
 -4 30 2 6306.21 591.434 6
 4 30 -3 734.249 254.715 6
 4 30 3 441.464 147.774 6
 -4 30 -3 442.202 220.738 6
 -4 30 3 829.823 241.595 6
 4 30 -4 2980.76 457.744 6
 -4 30 -4 3512.58 512.97 6
 4 30 4 2428.96 370.014 6
 4 30 -5 2473.66 423.25 6
 -4 30 -5 1995.41 393.753 6
 -4 30 -6 379.745 191.363 4
 4 30 -6 488.357 231.084 6
 4 30 -6 449.599 155.087 4
 -4 30 -6 575.631 289.443 6
 -4 30 -7 10210.2 759.729 4
 -4 30 -7 10586.9 865.589 6
 4 30 -7 11343.1 929.305 6
 4 30 -7 10524.2 739.95 4
 4 30 -8 1175.97 252.529 4
 -4 30 -8 1470.05 323.741 4
 -4 30 -8 1471.53 409.374 6
 4 30 -8 1802.7 432.658 6
 -4 30 -9 10275.6 789.282 4
 -4 30 -9 9330.63 800.759 6
 4 30 -9 9888.8 868.306 6
 4 30 -9 10285.4 766.631 4
 4 30 -10 1014.2 342.138 4
 4 30 -10 297.237 266.872 6
 -4 30 -10 1106.77 347.693 4
 4 30 -11 61458.2 1941.85 4
 -4 30 -11 57399 1893.8 4
 4 30 -11 54878 1902.41 6
 -4 30 -12 2003.9 382.168 4
 4 -30 12 1866.24 467.97 5
 4 30 -12 2196.88 397.118 6
 4 30 -12 1721.42 355.391 4
 4 -30 13 180.258 275.019 5
 -4 30 -13 216.049 151.503 4
 4 30 -13 -62.5539 164.665 4
 4 30 -14 4853.21 503.396 4
 4 -30 14 5234.15 723.364 5
 -4 30 -14 5058.64 520.938 4
 4 30 -15 5775.8 500.453 4
 -4 30 -15 6137.19 526.95 4
 4 -30 15 6097.83 711.969 5
 -4 30 -16 2996.84 343.292 4
 4 -30 16 2914.7 449.029 5
 4 30 -16 3095.99 332.076 4
 -4 32 0 148.259 170.74 6
 4 32 0 -17.1165 259.181 6
 4 32 -1 175.896 247.303 6
 -4 32 -1 781.315 256.016 6
 -4 32 1 656.895 246.139 6
 4 32 1 305.169 166.678 6
 -4 32 -2 16871.5 1044.61 6
 4 32 -2 15811.1 1057.25 6
 -4 32 2 13072.1 858.926 6
 4 32 2 12698.7 886.913 6
 4 32 -3 279.065 201.071 6
 -4 32 -3 302.298 230.88 6
 -4 32 3 412.564 269.21 6
 4 32 3 234.427 157.947 6
 -4 32 -4 3363.49 508.445 6
 4 32 4 3724.36 462.681 6
 4 32 -4 3473.68 504.577 6
 -4 32 -5 7453.77 742.915 6
 4 32 -5 7710.19 771.899 6
 4 32 -6 38894.8 1708.9 6
 -4 32 -6 38309.6 1644.5 6
 -4 32 -7 82151.9 2178.56 4
 4 32 -7 81173.8 2471.13 6
 4 32 -7 80246.4 2055.62 4
 -4 32 -7 75698.3 2297.75 6
 -4 32 -8 706.945 221.973 4
 -4 32 -8 1461.94 438.9 6
 4 32 -8 760.811 231.03 4
 4 32 -8 725.143 308.012 6
 4 -32 9 962.336 350.453 5
 4 32 -9 630.122 168.627 6
 4 32 -9 952.054 252.659 4
 -4 32 -9 1100.58 366.169 6
 -4 32 -9 1311.4 298.165 4
 4 -32 10 318.651 272.352 5
 4 32 -10 456.218 233.795 4
 -4 32 -10 579.335 252.493 4
 4 32 -11 7436.66 679.101 4
 4 32 -11 6074.64 637.212 6
 -4 32 -11 7600.87 686.108 4
 4 -32 11 7352.16 861.346 5
 -4 32 -12 -131.23 181.898 4
 4 32 -12 213.716 209.785 6
 4 -32 12 -67.7226 261.879 5
 4 32 -12 -24.3411 139.639 4
 4 32 -13 1785.2 313.634 4
 -4 32 -13 1900.04 320.124 4
 4 -32 13 2553.11 535.049 5
 4 -32 14 3626.18 576.351 5
 -4 32 -14 3949.98 436.586 4
 4 32 -14 3967.15 432.406 4
 4 32 -15 41864 1232.66 4
 -4 32 -15 43518.7 1275.45 4
 4 -32 15 43649.3 1749.33 5
 4 34 0 7021.48 722.697 6
 -4 34 0 6940.14 676.648 6
 -4 34 1 5854.15 624.376 6
 4 34 1 7294.08 717.394 6
 4 34 -1 7267.12 741.817 6
 -4 34 -1 7099.03 706.076 6
 -4 34 -2 7985.61 729.428 6
 4 34 -2 7410.23 754.444 6
 4 34 2 5708.14 609.74 6
 -4 34 2 5956.07 606.919 6
 -4 34 -3 4624.77 630.097 6
 4 34 3 3295.04 467.638 6
 4 34 -3 4579.73 621.128 6
 -4 34 -4 9123.28 820.045 6
 4 34 -4 8954.09 842.646 6
 -4 34 -5 41262.5 1699.65 6
 4 34 -5 43384.4 1829.46 6
 4 34 -6 48151.3 1929.61 6
 -4 34 -6 47638.9 1835.25 6
 4 34 -7 22285.9 1324.35 6
 -4 34 -7 22589.9 1268.74 6
 4 -34 7 25832.5 1392.73 5
 -4 34 -8 6798.76 708.93 6
 4 34 -8 7190.84 756.887 6
 4 -34 8 6823.79 760.482 5
 -4 34 -9 736.674 314.686 6
 4 -34 9 82.6681 233.2 5
 4 34 -9 -448.949 444.025 6
 4 -34 10 589.966 315.616 5
 -4 34 -10 470.32 212.297 4
 4 34 -10 3.27409 322.733 6
 -4 34 -11 3019.05 440.433 4
 4 -34 11 3007.76 589.095 5
 4 34 -11 2306.3 386.989 6
 -4 34 -12 76.3059 128.39 4
 4 34 -12 235.356 169.988 6
 4 -34 12 353.381 302.226 5
 4 -34 13 21435.7 1336.35 5
 4 -34 14 6690.28 714.834 5
 -4 36 0 38125.5 1588.05 6
 4 36 0 37152.9 1624.82 6
 -4 36 -1 3938.36 562.067 6
 4 36 -1 4634.11 601.667 6
 4 36 1 3462.82 514.633 6
 -4 36 1 3309.18 465.305 6
 4 36 -2 127.267 208.041 6
 -4 36 -2 258.545 205.667 6
 4 36 2 264.399 195.857 6
 -4 36 2 338.999 199.049 6
 -4 36 -3 511.312 298.031 6
 4 36 -3 392.721 240.108 6
 4 36 3 529.942 211.189 6
 -4 36 -4 56423.8 1970.33 6
 4 36 -4 56518.6 2112.91 6
 4 36 -5 50037 1962.39 6
 -4 36 -5 48944.4 1839.3 6
 -4 36 -6 16816 1113.1 6
 4 36 -6 17843.4 1176.26 6
 4 36 -7 34833.4 1617.94 6
 -4 36 -7 35704 1555.85 6
 4 36 -8 30.3465 333.827 6
 -4 36 -8 1509.62 413.758 6
 4 36 -9 474.646 290.829 6
 4 -36 9 1047.06 341.908 5
 4 -36 10 184.942 248.352 5
 4 36 -10 -402.775 288.444 6
 4 -36 11 116.81 189.349 5
 4 36 -11 -106.824 199.643 6
 4 -36 12 136.293 235.019 5
 4 36 -12 436.953 215.423 6
 4 -36 13 10560 865.982 5
 -4 38 0 55298.9 1878.84 6
 4 38 0 51195.4 1925.36 6
 -4 38 1 351.433 263.488 6
 -4 38 -1 361.443 194.99 6
 4 38 1 348.614 221.892 6
 4 38 -1 416.836 286.236 6
 4 38 -2 640.35 298.473 6
 -4 38 2 897.052 264.776 6
 -4 38 -2 925.981 332.109 6
 4 38 2 670.969 270.098 6
 -4 38 -3 11699.8 914.776 6
 4 38 3 12114.5 872.008 6
 4 38 -3 11581.4 955.235 6
 4 38 -4 35233.6 1660.74 6
 -4 38 -4 34712.5 1551.72 6
 4 38 -5 1750.99 415.324 6
 -4 38 -5 2197.8 459.854 6
 4 38 -6 2999.65 497.569 6
 -4 38 -6 3211.05 532.604 6
 4 38 -7 936.991 184.338 6
 -4 38 -7 2025.94 448.385 6
 4 38 -8 260.12 252.966 6
 4 38 -9 2714.21 409.493 6
 4 38 -10 523.453 222.758 6
 4 38 -11 906.135 278.379 6
 4 -38 11 1053.32 307.791 5
 4 -38 12 40.5974 160.192 5
 4 38 -12 79.9083 135.783 6
 -4 40 0 114370 2663.61 6
 4 40 0 112605 2813.57 6
 4 40 -1 2792.83 508.952 6
 -4 40 -1 3216.97 522.404 6
 4 40 1 2637.97 456.211 6
 4 40 2 -359.59 273.16 6
 -4 40 -2 593.908 334.749 6
 4 40 -2 438.939 253.858 6
 -4 40 -3 1601.14 392.2 6
 4 40 -3 1846.29 428.895 6
 4 40 3 1158.78 266.212 6
 -4 40 -4 3007.82 486.881 6
 4 40 -4 2229.66 414.993 6
 -4 40 -5 2890.91 482.996 6
 4 40 -5 1961.83 278.715 6
 -4 40 -6 499.539 283.064 6
 4 40 -6 -122.922 280.428 6
 4 40 -7 1879.65 360.07 6
 4 40 -8 2970.31 436.483 6
 4 40 -9 20146.5 1096.1 6
 4 40 -10 344.709 187.526 6
 4 40 -11 15521.7 820.506 6
 4 42 0 110708 2724.39 6
 4 42 1 4297.36 541.939 6
 4 42 -1 4207.06 563.821 6
 4 42 -2 39431.3 1691.58 6
 4 42 2 40636.4 1542.24 6
 4 42 -3 4565.31 567.626 6
 4 42 -4 -846.46 415.271 6
 4 42 -5 1391.53 272.317 6
 4 42 -6 -288.485 250.73 6
 4 42 -7 17504.1 1048.43 6
 4 42 -8 6197.25 607.482 6
 4 42 -9 39475.9 1411.31 6
 4 42 -10 1053.11 255.931 6
 4 44 0 56790.4 1842.94 6
 4 44 1 767.519 259.645 6
 4 44 -1 772.589 254.35 6
 4 44 -2 19511.3 1134.35 6
 4 44 -3 125.861 187.674 6
 4 44 -4 -143.228 247.877 6
 4 44 -5 676.105 202.832 6
 4 44 -6 1479.56 310.852 6
 4 44 -7 6930.8 618.805 6
 4 44 -8 6581.22 579.721 6
 4 44 -9 50122.2 1439.64 6
 4 46 0 40651.1 1440.83 6
 4 46 1 2009.46 319.549 6
 4 46 -1 2284.22 393.552 6
 4 46 -2 11137.3 793.87 6
 4 46 -3 632.812 213.739 6
 4 46 -4 244.954 172.391 6
 4 46 -5 601.341 189.179 6
 4 46 -6 477.257 194.797 6
 4 46 -7 499.07 192.398 6
 4 48 -1 661.654 192.492 6
 4 48 -2 230.605 148.191 6
 4 48 -3 920.753 256.565 6
 4 48 -4 11135.8 717.345 6
 -5 -1 0 134.119 129.546 2
 -5 1 0 279.75 156.599 2
 -5 1 -1 263104 2707.83 2
 5 -1 1 250013 2589.03 2
 -5 1 1 244618 2786.89 2
 -5 -1 -1 257183 2763.02 2
 -5 -1 -2 15729.8 635.371 2
 5 -1 2 16253.9 702.785 2
 5 1 2 15427.6 623.973 2
 5 -1 3 686130 4410.45 2
 5 1 3 679657 4314.88 2
 5 1 4 138359 1983.96 2
 -5 1 -4 135721 2053.58 2
 5 1 5 50654.5 1263.89 2
 -5 -1 -5 49610 1250.75 2
 -5 1 -5 50591.5 1333.03 2
 5 1 -5 51581 1455.59 1
 5 -1 5 49959.5 1239.25 2
 5 -1 -6 30364.3 1264.34 1
 5 1 -6 27088.9 1132.14 1
 5 -1 6 29795.8 989.452 2
 5 1 6 30002.5 997.952 2
 5 1 -7 9976.59 745.929 1
 5 1 7 11296.3 647.963 2
 5 -1 -7 10450.3 797.251 1
 5 1 7 9478.83 800.992 1
 5 -1 7 11360.4 657.202 2
 5 1 8 6479.54 527.71 2
 5 -1 -8 5691.44 630.116 1
 5 1 -8 5267.17 591.23 1
 5 -1 8 6210.86 530.853 2
 -5 1 -9 483.663 154.316 3
 5 1 9 907.131 247.329 5
 5 -1 9 540.118 189.892 2
 -5 -1 -10 921.313 213.452 3
 5 1 10 1232.33 369.574 5
 5 -1 10 1088.59 283.593 5
 -5 1 -10 811.663 201.863 3
 5 -1 11 1093.92 360.178 5
 -5 -1 -11 657.404 185.286 3
 -5 1 -11 840.977 197.184 3
 5 1 11 911.708 323.901 5
 5 1 -12 6610.25 678.935 3
 -5 1 -12 5884.4 548.676 3
 -5 -1 -12 5995.18 536.731 3
 5 1 12 5425.72 660.372 5
 5 -1 12 6108.99 674.047 5
 5 1 13 1492.37 371.199 5
 -5 1 -13 2022.38 352.645 3
 5 1 -13 1723.41 397.713 3
 5 -1 -13 1879.19 408.808 3
 5 -1 13 1309.85 408.372 5
 -5 -1 -13 1847.1 328.099 3
 5 1 -14 52842.3 2028.65 3
 5 -1 -14 55095.4 2088.01 3
 -5 1 -14 55289.9 1730.35 3
 -5 -1 -14 55606.4 1709.3 3
 5 -1 -15 37640 1751.82 3
 -5 1 -15 36888.8 1435.16 3
 -5 -1 -15 37780.4 1418.92 3
 5 1 -15 36809.4 1741.18 3
 5 -1 15 37785.7 1731.59 5
 5 1 -16 40175.5 1800.8 3
 5 -1 -16 40069.5 1797.7 3
 -5 1 -16 41458.4 1509.96 3
 -5 -1 -16 41340.2 1475.42 3
 5 1 -17 15436.2 1094.48 3
 5 -1 -17 15480.8 1093.36 3
 5 -1 -18 3247.78 499.502 3
 5 1 -18 2668.89 429.925 3
 5 -1 -19 930.432 238.055 3
 5 1 -19 1047.64 248.771 3
 5 -1 -20 154.991 138.324 3
 5 1 -20 226.195 147.131 3
 -5 3 0 4195.15 373.311 2
 -5 -3 -1 735.28 197.605 2
 -5 3 -1 1071.39 204.279 2
 -5 3 1 915.579 221.782 2
 -5 3 -2 19692.6 746.174 2
 5 -3 2 18853.7 762.314 2
 -5 3 3 13399.6 684.134 2
 -5 3 -3 13924.4 671.235 2
 5 -3 3 13753.2 635.683 2
 5 -3 4 55908.9 1276.73 2
 -5 3 -4 55006.5 1405.46 2
 5 3 4 57571.3 1221.59 2
 5 -3 5 165998 2333.1 2
 -5 3 -5 163244 2541.07 2
 -5 -3 -5 169418 2118.98 2
 5 3 -5 165946 2491.27 1
 5 3 5 169543 2257.35 2
 5 3 6 81457.3 1659.43 2
 5 -3 6 71400.5 1616.78 2
 5 -3 -6 79468.9 2100.42 1
 5 3 -6 72368 1781.76 1
 5 -3 7 3501.77 391.358 2
 5 3 -7 3597.83 434.525 1
 5 3 7 2682.07 415.818 1
 5 -3 -7 3087.29 440.522 1
 5 3 7 3503.22 372.151 2
 5 -3 8 3476.47 415.591 2
 5 3 8 3860.2 418.992 2
 5 -3 9 8142.28 664.135 2
 -5 3 -9 9064.46 580.954 3
 -5 3 -10 32013 1132.72 3
 -5 -3 -10 33070.9 1109.23 3
 -5 -3 -11 688.633 178.96 3
 5 3 11 1317.11 327.16 5
 5 3 -11 662.682 225.122 3
 -5 3 -11 732.838 213.247 3
 5 -3 12 2252.62 459.85 5
 5 3 -12 1522.09 317.629 3
 -5 -3 -12 1755.54 295.342 3
 -5 3 -12 1684.89 296.835 3
 -5 -3 -13 233.858 136.55 3
 5 -3 13 102.04 204.91 5
 5 3 -13 101.696 215.24 3
 5 -3 -13 110.598 198.624 3
 -5 3 -13 156.877 161.241 3
 5 -3 -14 14797.6 1090.01 3
 -5 3 -14 13964 895.26 3
 5 -3 14 11967.1 990.524 5
 -5 -3 -14 14990.6 872.513 3
 5 3 -14 14829.2 1075.28 3
 5 3 -15 5066.56 658.611 3
 5 -3 -15 5366.01 676.576 3
 -5 3 -15 4955.99 548.126 3
 -5 -3 -15 5589.35 536.913 3
 5 -3 15 5150.97 660.605 5
 5 -3 -16 39524.3 1783.38 3
 -5 -3 -16 42890.1 1462.91 3
 5 -3 16 42065.7 1815.19 5
 5 3 -16 40776.3 1808.27 3
 -5 3 -16 42528.9 1567.51 3
 5 -3 -17 33139.7 1578.11 3
 5 3 -17 33472.4 1605.97 3
 5 3 -18 -367.023 262.243 3
 5 -3 -18 329.251 192.996 3
 5 3 -19 8215.54 707.359 3
 5 -3 -19 7177.1 640.223 3
 5 3 -20 350.479 174.576 3
 5 3 -20 23.6459 90.7698 4
 -5 3 -20 151.561 134.588 4
 5 -3 -20 -17.1778 141.639 3
 -5 5 0 1725.22 251.882 2
 -5 5 -1 68466.1 1407.9 2
 -5 5 1 66219.4 1427.41 2
 -5 -5 -1 67839.6 1307.32 2
 -5 5 2 2551.06 320.961 2
 -5 5 -2 2304.57 283.238 2
 -5 -5 -2 2195.49 254.261 2
 -5 5 3 47142.9 1372.1 2
 5 -5 3 48280.2 1218.18 2
 -5 5 -3 47976.9 1319.73 2
 5 5 -4 16067.4 673.099 1
 5 -5 4 15435 713.911 2
 -5 5 4 15993.8 820.204 2
 -5 5 -4 14858.3 751.13 2
 -5 -5 -4 13335.3 538.537 2
 -5 5 5 4138.63 430.722 2
 5 5 -5 4062.1 374.234 1
 -5 -5 -5 3616.81 285.002 2
 5 -5 5 4062.62 398.77 2
 -5 5 -5 4080.37 431.893 2
 5 -5 -6 13720.6 910.024 1
 5 -5 6 12072.3 700.452 2
 5 5 6 13023.9 855.199 1
 5 5 -6 10791.9 664.205 1
 5 5 7 1427.33 342.977 1
 5 5 7 1412.14 208.832 2
 5 -5 7 1579.59 289.528 2
 5 -5 -7 961.046 248.222 1
 5 -5 8 108876 2345.25 2
 -5 5 -8 115279 1975.46 3
 5 -5 9 959.933 264.053 2
 -5 5 -9 933.911 217.341 3
 -5 5 -10 108538 2111.45 3
 5 5 -10 108491 2428.54 3
 5 5 -11 1103.03 275.684 3
 -5 -5 -11 1168.61 238.786 3
 -5 5 -11 1193.75 279.16 3
 5 5 -12 2587.65 427.641 3
 -5 5 -12 2842.23 406.267 3
 -5 -5 -12 3156.28 369.437 3
 5 -5 13 322.265 276.461 5
 -5 -5 -13 455.645 167.74 3
 5 5 -13 433.397 249.029 3
 -5 5 -13 360.676 195.927 3
 -5 -5 -14 994.397 238.804 3
 5 5 -14 963.239 352.447 3
 5 -5 -14 1048.04 334.89 3
 -5 5 -14 888.294 272.575 3
 5 -5 14 1058.02 391.585 5
 5 5 -15 15466.2 1109.06 3
 5 -5 -15 15188.5 1115.24 3
 5 -5 15 11932.6 993.959 5
 -5 5 -15 15403.1 962.83 3
 5 -5 -16 24945.3 1404.9 3
 5 5 -16 25867.8 1433.98 3
 5 -5 16 25001.3 1419.74 5
 5 5 -17 1798.7 370.061 3
 5 -5 -17 2445.59 455.783 3
 5 -5 17 2045.67 383.216 5
 5 -5 -18 6965.36 682.444 3
 5 5 -18 6596.63 684.312 3
 5 5 -19 30971.5 1360.29 3
 5 -5 -19 28842.7 1256.1 3
 5 5 -19 31360.6 1175.25 4
 5 5 -20 3245.97 358.064 4
 -5 5 -20 3677.07 401.893 4
 5 5 -20 2974.65 408.409 3
 5 -5 -20 3250.86 383.22 3
 -5 7 0 95.885 98.8084 2
 -5 7 1 84525.7 1575.56 2
 -5 7 -1 84039.6 1643.18 2
 5 -7 -1 85654.9 1761.67 2
 -5 7 2 3492.84 344.569 2
 -5 -7 -2 2845.35 287.103 2
 5 7 -3 10578.4 434.426 1
 5 -7 3 10189.7 592.864 2
 -5 7 3 9457.41 598.659 2
 -5 7 -3 9938.19 621.822 2
 -5 7 4 29180.7 1122.43 2
 5 7 -4 28886 822.578 1
 -5 -7 -4 30048.7 720.015 2
 5 7 4 27978 1037.47 1
 -5 7 -4 27309.4 1069.48 2
 5 -7 4 28242.7 1020.48 2
 5 7 -5 11417 587.851 1
 -5 7 5 12826.6 799.675 2
 5 -7 5 12374.3 700.764 2
 -5 -7 -5 12316.1 435.774 2
 5 7 5 11162 730.593 1
 5 -7 -6 15268.9 974.43 1
 -5 7 6 14471.3 895.461 2
 5 -7 6 12535.7 746.897 2
 5 7 6 13883.9 883.044 1
 -5 7 7 1924.92 339.126 2
 5 -7 7 1908.53 304.298 2
 5 -7 -7 1304.07 301.175 1
 5 7 7 1156.97 280.22 1
 5 -7 8 23081 1133.07 2
 -5 7 8 24669.1 1243.71 2
 -5 7 -8 24157 944.448 3
 -5 7 -9 26200.8 1013.17 3
 5 7 -9 26715 1140.41 3
 5 7 -10 270418 3812.49 3
 -5 7 -10 269125 3383.5 3
 -5 7 -11 240.101 185.992 3
 5 7 -11 206.436 185.32 3
 5 7 -12 126689 2874.83 3
 -5 7 -12 126912 2562.72 3
 5 7 -13 3419.08 517.859 3
 5 -7 13 3976.07 590.601 5
 -5 7 -13 2451.69 395.477 3
 5 -7 14 392.576 305.989 5
 -5 7 -14 265.41 185.074 3
 5 7 -14 312.534 210.616 3
 5 -7 -14 317.515 205.399 3
 5 7 -15 14256.3 1078.22 3
 5 -7 -15 15005.1 1113.49 3
 -5 7 -15 14878 963.035 3
 5 -7 15 15849.1 1172.45 5
 5 -7 -16 9333.29 862.703 3
 5 -7 16 8966.28 883.623 5
 5 7 -16 9501.31 842.524 3
 5 -7 -17 3778.58 536.968 3
 5 7 -17 4197.05 561.958 3
 5 -7 17 3691.2 565.217 5
 5 7 -18 4516.02 562.728 3
 5 -7 -18 4395.08 544.762 3
 5 7 -19 63082.1 1621.77 4
 -5 7 -19 66839.9 1721.79 4
 5 7 -19 65056.9 1952.88 3
 5 7 -20 5629.11 451.557 4
 -5 7 -20 6379.27 498.967 4
 5 7 -20 5787.26 549.194 3
 5 -7 -20 5092.36 451.585 3
 5 -9 0 1084.01 227.642 2
 -5 9 0 1150.51 213.095 2
 -5 9 1 248911 2762.77 2
 -5 9 -1 246789 2979.97 2
 5 -9 -1 252733 3224.36 2
 -5 -9 -2 19206.7 672.443 2
 5 -9 2 20566.4 860.145 2
 5 9 2 19920.4 688.361 1
 -5 9 2 19862.7 793.711 2
 5 9 -2 20031.1 384.63 1
 -5 9 -2 19830.2 877.701 2
 -5 9 3 62563.4 1443.33 2
 5 -9 3 67148.1 1578.52 2
 5 9 3 64969.1 1412.38 1
 -5 9 4 3102.44 347.287 2
 5 9 4 3103.54 349.357 1
 5 -9 4 2889.72 354.601 2
 -5 -9 -4 3061.42 209.842 2
 -5 9 -4 2898.56 379.769 2
 -5 9 5 3557.41 411.618 2
 5 -9 5 3437.91 393.771 2
 5 9 5 3452.52 408.904 1
 5 9 6 12173.2 836.506 1
 5 -9 6 12826.8 800.293 2
 -5 9 6 14385.1 862.199 2
 5 9 7 21698.3 1227.48 1
 5 -9 7 23263.4 1120.01 2
 -5 9 7 25761.5 1230.53 2
 -5 9 -7 24220.4 923.333 3
 5 9 -8 8021.45 598.036 3
 -5 9 -8 7222.19 531.228 3
 5 9 -9 14378.2 847.9 3
 -5 9 -9 14467.1 783.835 3
 -5 9 -10 252847 3386.08 3
 5 9 -10 258267 3723.56 3
 5 9 -11 676.988 306.358 3
 -5 9 -11 686.155 300.437 3
 5 9 -12 107800 2661.04 3
 -5 9 -12 107594 2408.93 3
 5 9 -13 685.802 271.607 3
 -5 9 -13 444.402 218.476 3
 5 9 -14 29466.9 1471.13 3
 5 -9 -14 31988.1 1599.69 3
 -5 9 -14 29564 1334.89 3
 5 -9 14 32480.9 1655.86 5
 5 9 -15 1650.06 377.49 3
 5 -9 15 1626.16 420.03 5
 5 -9 -15 1468.5 341.356 3
 5 9 -16 364.977 221.96 3
 5 -9 -16 802.752 269.755 3
 5 -9 16 742.012 328.674 5
 5 9 -17 860.548 257.459 3
 5 -9 -17 1031.42 263.645 3
 5 -9 17 954.114 337.882 5
 5 -9 -18 12850.3 879.381 3
 5 9 -18 11664.8 889.821 3
 5 9 -18 11785.2 747.67 4
 -5 9 -18 12015.4 783.697 4
 5 -9 18 12759.2 935.694 5
 5 9 -19 38153.5 1237.57 4
 -5 9 -19 41628.8 1331.25 4
 5 9 -19 41756 1533.14 3
 -5 9 -20 3728.89 380.874 4
 5 9 -20 3202.77 344.701 4
 5 9 -20 3561.2 425.624 3
 5 -11 0 185.26 151.98 2
 -5 11 0 224.732 142.023 2
 5 -11 1 140026 2336.77 2
 5 -11 -1 136757 2493.76 2
 -5 11 1 128647 2116.54 2
 -5 11 -1 129989 2276.86 2
 5 -11 2 3712.28 389.142 2
 -5 11 2 2938.31 317.369 2
 5 -11 -2 2874.06 358.025 2
 -5 11 -2 2956.13 368.432 2
 5 11 2 2774.11 251.81 1
 -5 -11 -3 11786.5 496.047 2
 5 11 3 14564.6 670.466 1
 5 -11 3 14105.4 756.005 2
 -5 11 3 14244.7 696.257 2
 -5 11 -3 13014 775.437 2
 -5 11 4 307.302 115.436 2
 5 -11 4 138.376 110.569 2
 5 11 4 142.774 118.787 1
 -5 -11 -4 203.417 51.6145 2
 -5 11 5 14042.2 749.696 2
 5 11 5 12984.9 801.6 1
 5 -11 5 13285.3 795.659 2
 5 -11 6 167522 2971.48 2
 5 11 6 164055 3083.17 1
 -5 11 7 130.536 99.0881 2
 -5 11 -7 286.466 159.887 3
 -5 11 -8 44787.3 1337.02 3
 5 11 -8 44574.6 1410.61 3
 5 11 -9 6228.42 557.833 3
 -5 11 -9 6864.62 547.162 3
 5 11 -10 242858 3653.61 3
 -5 11 -10 244271 3406.1 3
 5 11 -11 520.05 239.869 3
 -5 11 -11 967.992 309.135 3
 -5 11 -12 41302.9 1514.37 3
 5 11 -12 42169.2 1657.66 3
 5 11 -13 1618.13 384.165 3
 -5 11 -13 1065.05 283.201 3
 5 11 -14 1009.81 339.492 3
 5 -11 -14 735.934 216.11 3
 5 -11 14 1382.05 419.473 5
 5 -11 15 2955.71 551.335 5
 5 11 -15 2584.72 447.785 3
 5 -11 -15 2960.2 461.438 3
 5 -11 -16 3487.64 501.108 3
 5 11 -16 3305.67 421.265 4
 5 11 -16 3769.31 533.028 3
 5 -11 16 4581.43 647.276 5
 5 -11 -17 1165.32 273.722 3
 5 11 -17 1870.33 371.54 3
 5 11 -17 1077.71 230.886 4
 -5 11 -17 1348.66 269.989 4
 5 -11 17 1454.85 377.78 5
 5 11 -18 1740.63 362.91 3
 5 11 -18 1802.16 281.628 4
 -5 11 -18 1789.58 316.291 4
 5 -11 18 2013.54 404.034 5
 5 -11 -18 2163.51 359.589 3
 5 -11 19 29663.5 1250.84 5
 5 11 -19 32644.8 1126.63 4
 -5 11 -19 34849.6 1203.99 4
 5 11 -19 35462.4 1379.76 3
 5 -11 -19 30294.7 1149.46 3
 -5 11 -20 1737.91 248.166 4
 5 11 -20 1439.29 272.734 3
 5 -13 0 964.821 233.457 2
 -5 13 0 1120.68 232.363 2
 5 -13 1 161068 2624.77 2
 -5 13 1 150783 2453.04 2
 5 -13 -1 159727 2856.14 2
 -5 13 -1 146395 2581.78 2
 5 -13 -2 540.68 170.388 2
 5 -13 2 313.744 160.941 2
 -5 13 2 499.513 150.144 2
 -5 13 -2 484.57 148.488 2
 -5 13 -3 19875.7 1006.37 2
 5 -13 3 21673.1 987.028 2
 -5 13 3 22225.1 920.17 2
 -5 -13 -3 19256.1 638.439 2
 5 -13 4 7468.08 606.728 2
 -5 13 4 6929.71 517.613 2
 5 -13 5 186317 3117.99 2
 -5 13 5 198751 2809.7 2
 -5 13 6 126335 2299.97 2
 5 13 -7 26991.5 1052.25 3
 -5 13 -7 26633.5 1008.81 6
 5 13 -7 24418.6 866.387 4
 5 13 -8 2287.9 331.304 3
 5 13 -8 2279.14 316.271 6
 5 13 -9 4751.04 501.141 3
 5 13 -10 90069.6 2249.1 3
 5 13 -11 1024.86 272.863 3
 5 13 -12 397.655 256.532 3
 5 13 -13 665.296 261.451 3
 5 -13 14 22345.4 1415.9 5
 5 13 -14 21118.6 1115.2 4
 5 13 -14 20028.8 1202.19 3
 5 -13 -14 20299 1236.06 3
 5 13 -15 13956.2 1007.94 3
 5 -13 -15 13496.8 988.204 3
 5 13 -15 12735.9 859.746 4
 -5 13 -15 14447.5 942.003 4
 5 -13 15 14147.2 1139.96 5
 5 -13 -16 19778.6 1162.36 3
 5 13 -16 19433.2 1027.48 4
 5 -13 16 21913.3 1377.69 5
 -5 13 -16 20880.5 1093.4 4
 5 13 -16 20066.6 1198.67 3
 5 -13 17 5799.35 690.529 5
 5 13 -17 5349.23 513.188 4
 -5 13 -17 5920.53 550.684 4
 5 -13 -17 5855.75 599.92 3
 5 13 -17 6313.02 664.632 3
 5 -13 -18 799.406 217.412 3
 5 13 -18 1285.47 291.937 3
 5 13 -18 820.464 188.116 4
 -5 13 -18 850.666 191.873 4
 5 -13 18 876.981 247.453 5
 -5 13 -19 3366.47 363.154 4
 5 13 -19 3679.04 437.922 3
 5 -13 -19 2813.01 335.304 3
 5 -13 19 2942.7 424.175 5
 5 13 -19 3173.32 350.796 4
 5 -15 0 174.509 151.851 2
 -5 15 0 71.411 103.15 2
 -5 15 -1 752.342 201.819 2
 5 -15 1 1268.05 278.991 2
 -5 15 1 1037.87 234.689 2
 5 -15 -1 1244.47 266.113 2
 -5 15 -2 687.521 198.965 2
 5 -15 2 1296.77 276.193 2
 -5 15 2 1151.29 256.069 2
 5 -15 -2 1236.31 289.924 2
 5 -15 3 46778.3 1538.22 2
 -5 15 3 47548.8 1456.37 2
 5 -15 4 145173 2796.72 2
 -5 15 4 150763 2572.22 2
 -5 15 -5 200155 2696.76 6
 -5 15 5 207954 3029.82 2
 5 15 -6 132285 2335.95 6
 -5 15 -6 133700 2243.05 6
 -5 15 -6 133312 2033.38 4
 5 15 -6 127561 1942.15 4
 5 15 -7 41419.1 1310.57 3
 -5 15 -7 39824.2 1173.94 4
 5 15 -7 37261.3 1113.09 4
 -5 15 -7 41233.6 1288.54 6
 5 15 -7 39079.7 1297.27 6
 5 15 -8 419.187 153.029 6
 5 15 -8 749.027 216.522 3
 5 15 -8 498.036 132.717 4
 -5 15 -8 509.362 146.947 4
 5 15 -9 1816.9 305.981 6
 5 15 -9 1884.27 315.853 3
 5 15 -9 1844.13 295.269 4
 -5 15 -9 2068.8 311.537 4
 5 15 -10 15214.4 880.646 4
 -5 15 -10 15528.8 872.276 4
 5 15 -10 15588.2 930.48 3
 5 15 -11 744.309 241.37 3
 5 15 -11 712.687 207.392 4
 -5 15 -11 836.455 212.72 4
 5 15 -12 3820.5 517.227 3
 5 15 -12 4402.01 519.344 4
 -5 15 -12 3591.72 460.464 4
 5 15 -13 4808.4 547.293 4
 -5 15 -13 5120.55 560.832 4
 5 15 -13 4712.39 580.804 3
 5 15 -14 57832.8 1837.15 4
 -5 15 -14 58240.2 1877.26 4
 5 -15 14 59435.6 2320.75 5
 5 15 -14 55652.2 1954.44 3
 5 15 -15 32176.5 1351.82 4
 5 -15 -15 33502.7 1542.63 3
 -5 15 -15 34028.3 1425.78 4
 5 15 -15 32853.5 1522.4 3
 5 -15 15 33330.9 1753.69 5
 5 -15 -16 50409.2 1802.66 3
 5 15 -16 48746.4 1609.94 4
 -5 15 -16 52368.5 1710.99 4
 5 15 -16 51230.4 1857.75 3
 5 -15 16 52120.5 2137.31 5
 5 -15 17 19978.9 1313.09 5
 5 15 -17 17232.2 915.863 4
 -5 15 -17 18221.6 965.41 4
 5 -15 -17 17196 985.002 3
 5 15 -17 16944.6 1030.43 3
 -5 15 -18 600.745 174.694 4
 5 -15 18 536.234 225.235 5
 5 -15 -18 509.299 174.176 3
 5 15 -18 493.724 190.998 3
 5 15 -18 93.2919 106.574 4
 5 15 -19 278.549 128.135 4
 -5 15 -19 309.553 149.14 4
 5 -15 19 106.603 201.951 5
 5 -17 0 4818.75 528.878 2
 -5 17 0 4549.83 493.431 2
 5 -17 -1 7115.92 676.246 2
 -5 17 -1 6341.21 590.393 2
 5 -17 1 7816.75 656.196 2
 -5 17 1 6211 562.915 2
 5 -17 2 2171.12 354.923 2
 -5 17 2 2576.51 373.922 2
 5 -17 -2 2238.9 403.332 2
 -5 -17 -3 368875 2608.33 2
 5 -17 3 372072 4532.38 2
 -5 17 3 370147 4321.67 2
 5 17 -4 132700 2342.56 6
 -5 17 -4 139133 2284.21 6
 -5 17 4 136331 2644.38 2
 -5 17 -5 165271 2266.98 4
 5 17 -5 163298 2243.65 4
 5 17 -5 166009 2680.34 6
 -5 17 -5 167988 2572.09 6
 5 17 -6 139841 2167.56 4
 -5 17 -6 142747 2224.34 4
 -5 17 -6 141696 2390 6
 5 17 -6 140283 2518.76 6
 5 17 -7 38110.2 1266.14 3
 5 17 -7 34108.6 1108.23 4
 -5 17 -7 36473.8 1161.92 4
 -5 17 -7 35019.4 1250.93 6
 5 17 -7 36435.5 1312.28 6
 5 17 -8 23469.7 966.605 4
 -5 17 -8 24377.1 999.229 4
 5 17 -8 24034.9 1085.15 6
 -5 17 -8 24647.5 1078.56 6
 5 17 -8 26621.8 1125.75 3
 5 17 -9 879.112 184.348 6
 5 17 -9 873.733 243.525 3
 5 17 -9 1256.86 245.611 4
 -5 17 -9 1018.25 246.756 4
 -5 17 -10 9114.78 682.537 4
 5 17 -10 8646.75 710.166 3
 5 17 -10 9851.59 714.114 4
 5 17 -11 300.052 153.958 3
 5 17 -11 443.791 182.846 4
 -5 17 -11 161.181 123.954 4
 5 17 -12 26126.8 1242.67 4
 5 17 -12 23647 1255.69 3
 5 17 -13 6688.36 700.989 3
 5 17 -13 7156.77 675.92 4
 -5 17 -13 7128.16 673.79 4
 5 -17 14 85907.1 2803.01 5
 5 17 -14 85664.7 2251.65 4
 -5 17 -14 84380.1 2257.49 4
 5 17 -14 81259.3 2344.49 3
 5 -17 -14 82491.2 2424.7 3
 5 17 -15 49844.7 1689.32 4
 -5 17 -15 50635 1728.69 4
 5 -17 -15 51755.1 1869.73 3
 5 17 -15 48780.1 1820.18 3
 5 -17 15 53991 2237.49 5
 5 -17 -16 75068.6 2145.2 3
 -5 17 -16 72503.6 2007.26 4
 5 17 -16 69455.5 1922.54 4
 5 17 -16 68784.3 2089.67 3
 5 -17 16 72119.6 2520.95 5
 5 17 -17 32357.2 1251.06 4
 -5 17 -17 33646.3 1313.73 4
 5 17 -17 32810.4 1389.34 3
 5 -17 17 31993.5 1599.8 5
 5 -17 -17 34674.4 1356.65 3
 -5 17 -18 4183.18 436.032 4
 5 17 -18 3700.44 391.344 4
 5 17 -18 4445.26 488.657 3
 5 -17 18 3837.6 498.035 5
 5 17 -19 52.3369 88.8142 4
 -5 17 -19 485.054 153.814 4
 5 -17 19 217.528 154.282 5
 5 19 0 3182.86 359.95 6
 5 -19 0 2402.89 399.901 2
 -5 19 1 4135.11 500.044 2
 -5 19 -1 3951.45 387.887 6
 5 19 -1 4302.16 421.173 6
 5 -19 -1 3903.11 533.224 2
 5 -19 1 4657.15 542.585 2
 5 19 -2 8529.67 601.346 6
 -5 19 2 7998.96 685.579 2
 -5 19 -2 8086.63 560.742 6
 5 -19 -2 7497.7 745.358 2
 -5 19 -3 86062.7 1604.04 4
 5 19 -3 86837.2 1949.15 6
 -5 19 -3 87320.7 1908.28 6
 -5 19 3 82776.3 2157.55 2
 5 19 -4 44479.6 1428.58 6
 5 19 -4 46728.3 1244.7 4
 -5 19 -4 45871.4 1209.43 4
 -5 19 -4 45360.2 1386.71 6
 5 19 -5 126455 2442.35 6
 5 19 -5 123023 2067.97 4
 -5 19 -5 124393 2062.55 4
 -5 19 -5 128618 2377.62 6
 5 19 -6 136533 2593.47 6
 5 19 -6 131363 2177.17 4
 -5 19 -6 133998 2231.74 4
 -5 19 -6 136100 2484.53 6
 5 19 -7 29085.6 1065.94 4
 -5 19 -7 31268.7 1141.86 4
 -5 19 -7 30543.1 1201.81 6
 5 19 -7 32183.1 1171.85 3
 5 19 -7 29688.7 1238.92 6
 -5 19 -8 5352.44 549.418 6
 5 19 -8 4705.69 455.963 4
 -5 19 -8 4879.07 477.999 4
 5 19 -8 5343.12 507.8 3
 5 19 -8 4833.34 497.726 6
 5 19 -9 576.947 180.614 4
 -5 19 -9 770.139 305.244 6
 5 19 -9 623.683 204.385 6
 5 19 -9 431.491 157.222 3
 -5 19 -9 504.17 195.06 4
 5 19 -10 6056.95 574.394 4
 -5 19 -10 5670.91 548.422 4
 5 19 -10 6368.55 598.753 6
 5 19 -10 4656.45 533.923 3
 5 19 -11 396.915 224.502 3
 5 19 -11 355.804 151.169 4
 -5 19 -11 395.397 181.811 4
 5 19 -12 4880.45 593.111 3
 5 19 -12 5051.52 562.377 4
 -5 19 -12 4730.73 533.779 4
 5 19 -13 1460.97 331.125 3
 5 19 -13 1138.81 283.128 4
 -5 19 -13 1484.12 340.617 4
 5 19 -14 58682.7 1893.27 4
 -5 19 -14 58373.8 1907.72 4
 5 -19 -14 58779.6 2018.94 3
 5 19 -14 54842.8 1911.97 3
 5 -19 14 57306.5 2315.92 5
 5 19 -15 50075.5 1719.43 4
 -5 19 -15 49345.2 1717.55 4
 5 19 -15 46084 1724.34 3
 5 -19 15 48431.7 2117.72 5
 5 -19 -15 53731.6 1873.93 3
 -5 19 -16 66519.3 1915.33 4
 5 19 -16 64741.2 1833.88 4
 5 19 -16 64252.5 1945.01 3
 5 -19 16 68845.4 2447.98 5
 5 19 -17 32424.4 1209.33 4
 -5 19 -17 35402.2 1304.42 4
 5 19 -17 34644.2 1366.2 3
 5 -19 17 34124.8 1628.09 5
 5 19 -18 995.759 209.178 4
 -5 19 -18 1200.58 233.912 4
 5 -19 18 1542.77 340.23 5
 5 21 0 605.597 210.175 6
 5 -21 0 634.814 288.956 2
 -5 21 0 276.097 141.468 6
 5 21 -1 50769.9 1519.73 6
 -5 21 1 51154.2 1383.17 6
 5 21 1 49223.3 1453.83 6
 5 -21 -1 45989.6 1897.83 2
 -5 21 -1 51827.1 1454.57 6
 5 -21 -2 1031.27 307.433 2
 5 21 -2 2186.67 331.864 6
 5 21 2 1288.56 243.93 6
 5 21 -2 1742.05 243.057 4
 -5 21 -2 1967.44 264.683 4
 -5 21 2 1533.52 252.276 6
 -5 21 -2 1562.42 257.849 6
 5 21 -3 42150.7 1197.74 4
 -5 21 -3 40348.8 1154.05 4
 5 21 3 41229 1322.86 6
 5 21 -3 42157.4 1434.6 6
 -5 21 -3 44177.1 1411.49 6
 5 21 -4 50293 1585.42 6
 5 21 4 53542.7 1493.77 6
 -5 21 -4 50149.4 1319.89 4
 -5 21 -4 52265.3 1549.13 6
 5 21 -4 51939.5 1373.22 4
 5 21 -5 72277.3 1655.95 4
[truncated: 348,347 more chars]
