# Supplementary material
Source: publisher figshare collection journal article supplement (https://acs.figshare.com/ndownloader/files/16775912)
Supplement: Supplementary file 1 [file 16775912 › LIFM-114-80C.cif]

data_114-80C
_audit_creation_date               2018-07-20
_audit_creation_method
;
Olex2 1.2
(compiled 2018.05.29 svn.r3508 for OlexSys, GUI svn.r5506)
;
_shelx_SHELXL_version_number       '2014/7'
_audit_contact_author_address      ?
_audit_contact_author_email        ?
_audit_contact_author_name         ''
_audit_contact_author_phone        ?
_publ_contact_author_id_orcid      ?
_publ_section_references
;
Dolomanov, O.V., Bourhis, L.J., Gildea, R.J, Howard, J.A.K. & Puschmann, H.
 (2009), J. Appl. Cryst. 42, 339-341.

Sheldrick, G.M. (2015). Acta Cryst. A71, 3-8.

Sheldrick, G.M. (2015). Acta Cryst. C71, 3-8.
;
_chemical_name_common              LIFM-114-80C
_chemical_name_systematic          ?
_chemical_formula_moiety          
 '0.25(C216 H128 O64 Zr12), 0.25(C108 H64 O36 Zr8), 0.25(C108 H64 O28 Zr4)'
_chemical_formula_sum              'C108 H64 O32 Zr6'
_chemical_formula_weight           2420.91
_chemical_melting_point            ?
_chemical_oxdiff_formula           'C H O Zr'
_chemical_oxdiff_usercomment       114-80
loop_
  _atom_type_symbol
  _atom_type_description
  _atom_type_scat_dispersion_real
  _atom_type_scat_dispersion_imag
  _atom_type_scat_source
 'C' 'C' 0.0181 0.0091 'International Tables Vol C Tables 4.2.6.8 and 6.1.1.4'
 'H' 'H' 0.0000 0.0000 'International Tables Vol C Tables 4.2.6.8 and 6.1.1.4'
 'O' 'O' 0.0492 0.0322 'International Tables Vol C Tables 4.2.6.8 and 6.1.1.4'
 'Zr' 'Zr' -0.1862 2.2449
 'International Tables Vol C Tables 4.2.6.8 and 6.1.1.4'

_shelx_space_group_comment
;
The symmetry employed for this shelxl refinement is uniquely defined
by the following loop, which should always be used as a source of
symmetry information in preference to the above space-group names.
They are only intended as comments.
;
_space_group_crystal_system        'orthorhombic'
_space_group_IT_number             65
_space_group_name_H-M_alt          'C m m m'
_space_group_name_Hall             '-C 2 2'
loop_
  _space_group_symop_operation_xyz
 'x, y, z'
 '-x, -y, z'
 'x, -y, -z'
 '-x, y, -z'
 'x+1/2, y+1/2, z'
 '-x+1/2, -y+1/2, z'
 'x+1/2, -y+1/2, -z'
 '-x+1/2, y+1/2, -z'
 '-x, -y, -z'
 'x, y, -z'
 '-x, y, z'
 'x, -y, z'
 '-x+1/2, -y+1/2, -z'
 'x+1/2, y+1/2, -z'
 '-x+1/2, y+1/2, z'
 'x+1/2, -y+1/2, z'

_cell_length_a                     21.0637(7)
_cell_length_b                     42.3687(11)
_cell_length_c                     18.0144(4)
_cell_angle_alpha                  90
_cell_angle_beta                   90
_cell_angle_gamma                  90
_cell_volume                       16076.8(8)
_cell_formula_units_Z              4
_cell_measurement_reflns_used      6358
_cell_measurement_temperature      150.00(10)
_cell_measurement_theta_max        65.4670
_cell_measurement_theta_min        4.7090
_shelx_estimated_absorpt_T_max     0.933
_shelx_estimated_absorpt_T_min     0.334
_exptl_absorpt_coefficient_mu      3.515
_exptl_absorpt_correction_T_max    1.00000
_exptl_absorpt_correction_T_min    0.27052
_exptl_absorpt_correction_type     multi-scan
_exptl_absorpt_process_details
;
CrysAlisPro 1.171.38.43 (Rigaku Oxford Diffraction, 2015)
Empirical absorption correction using spherical harmonics,
 implemented in SCALE3 ABSPACK scaling algorithm.
;
_exptl_absorpt_special_details     ?
_exptl_crystal_colour              colourless
_exptl_crystal_colour_primary      colourless
_exptl_crystal_density_diffrn      1.000
_exptl_crystal_density_meas        ?
_exptl_crystal_density_method      ?
_exptl_crystal_description         prism
_exptl_crystal_F_000               4832
_exptl_crystal_size_max            0.4
_exptl_crystal_size_mid            0.04
_exptl_crystal_size_min            0.02
_exptl_transmission_factor_max     ?
_exptl_transmission_factor_min     ?
_diffrn_reflns_av_R_equivalents    0.0402
_diffrn_reflns_av_unetI/netI       0.0455
_diffrn_reflns_Laue_measured_fraction_full  0.971
_diffrn_reflns_Laue_measured_fraction_max  0.971
_diffrn_reflns_limit_h_max         24
_diffrn_reflns_limit_h_min         -23
_diffrn_reflns_limit_k_max         49
_diffrn_reflns_limit_k_min         -31
_diffrn_reflns_limit_l_max         15
_diffrn_reflns_limit_l_min         -20
_diffrn_reflns_number              17653
_diffrn_reflns_point_group_measured_fraction_full  0.971
_diffrn_reflns_point_group_measured_fraction_max  0.971
_diffrn_reflns_theta_full          65.687
_diffrn_reflns_theta_max           65.687
_diffrn_reflns_theta_min           3.768
_diffrn_ambient_environment        N~2~
_diffrn_ambient_temperature        150.00(10)
_diffrn_detector                   'CCD plate'
_diffrn_detector_area_resol_mean   5.2913
_diffrn_detector_type              AtlasS2
_diffrn_measured_fraction_theta_full  0.971
_diffrn_measured_fraction_theta_max  0.971
_diffrn_measurement_details
;
List of Runs (angles in degrees, time in seconds):

  # Type    Start    End  Width  t~exp~   \w     \q     \k     \f   Frames
--------------------------------------------------------------------------
  1  \w    -65.00  22.00   1.00   18.00    --    1.62 -37.00 150.00   87
  2  \w     59.00  85.00   1.00   22.00    --   88.73  77.00 -90.00   26
  3  \w    122.00 155.00   1.00   22.00    --   88.73  77.00 -90.00   33
  4  \w    110.00 157.00   1.00   22.00    --   88.73 125.00 120.00   47
  5  \w     15.00 100.00   1.00   22.00    --   88.73 -30.00 120.00   85
  6  \w    117.00 159.00   1.00   22.00    --   88.73 125.00-150.00   42
  7  \w     26.00  59.00   1.00   22.00    --   88.73 -15.00 -30.00   33
;
_diffrn_measurement_device         'four-circle diffractometer'
_diffrn_measurement_device_type    'SuperNova, Dual, Cu at zero, AtlasS2'
_diffrn_measurement_method         '\w scans'
_diffrn_orient_matrix_type        
 'CrysAlisPro convention (1999,Acta A55,543-557)'
_diffrn_orient_matrix_UB_11        0.0220780000
_diffrn_orient_matrix_UB_12        0.0243904000
_diffrn_orient_matrix_UB_13        0.0580484000
_diffrn_orient_matrix_UB_21        0.0601974000
_diffrn_orient_matrix_UB_22        0.0064658000
_diffrn_orient_matrix_UB_23        -0.0461011000
_diffrn_orient_matrix_UB_31        -0.0351125000
_diffrn_orient_matrix_UB_32        0.0262132000
_diffrn_orient_matrix_UB_33        -0.0425735000
_diffrn_radiation_monochromator    mirror
_diffrn_radiation_probe            x-ray
_diffrn_radiation_type             CuK\a
_diffrn_radiation_wavelength       1.54184
_diffrn_source                     'micro-focus sealed X-ray tube'
_diffrn_source_type                'SuperNova (Cu) X-ray Source'
_reflns_Friedel_coverage           0.000
_reflns_Friedel_fraction_full      .
_reflns_Friedel_fraction_max       .
_reflns_number_gt                  5782
_reflns_number_total               7306
_reflns_odcompleteness_completeness  99.55
_reflns_odcompleteness_iscentric   1
_reflns_odcompleteness_theta       61.08
_reflns_special_details
;
 Reflections were merged by SHELXL according to the crystal
 class for the calculation of statistics and refinement.
 
 Structure factors included contributions from the .fab file.
 
 _reflns_Friedel_fraction is defined as the number of unique
 Friedel pairs measured divided by the number that would be
 possible theoretically, ignoring centric projections and
 systematic absences.
;
_reflns_threshold_expression       'I > 2\s(I)'
_computing_cell_refinement         'CrysAlisPro 1.171.38.43 (Rigaku OD, 2015)'
_computing_data_collection         'CrysAlisPro 1.171.38.43 (Rigaku OD, 2015)'
_computing_data_reduction          'CrysAlisPro 1.171.38.43 (Rigaku OD, 2015)'
_computing_molecular_graphics      'Olex2 (Dolomanov et al., 2009)'
_computing_publication_material    'Olex2 (Dolomanov et al., 2009)'
_computing_structure_refinement    'ShelXL (Sheldrick, 2015)'
_computing_structure_solution      'ShelXT (Sheldrick, 2015)'
_refine_diff_density_max           2.015
_refine_diff_density_min           -4.000
_refine_diff_density_rms           0.245
_refine_ls_extinction_coef         .
_refine_ls_extinction_method       none
_refine_ls_goodness_of_fit_ref     1.000
_refine_ls_hydrogen_treatment      constr
_refine_ls_matrix_type             full
_refine_ls_number_parameters       554
_refine_ls_number_reflns           7306
_refine_ls_number_restraints       950
_refine_ls_R_factor_all            0.1524
_refine_ls_R_factor_gt             0.1360
_refine_ls_restrained_S_all        0.974
_refine_ls_shift/su_max            0.000
_refine_ls_shift/su_mean           0.000
_refine_ls_structure_factor_coef   Fsqd
_refine_ls_weighting_details      
 'w=1/[\s^2^(Fo^2^)+(0.2000P)^2^+600.0000P] where P=(Fo^2^+2Fc^2^)/3'
_refine_ls_weighting_scheme        calc
_refine_ls_wR_factor_gt            0.3562
_refine_ls_wR_factor_ref           0.3721
_refine_special_details
;
 Refined as a 2-component inversion twin.
;
_olex2_refinement_description
;
1. Twinned data refinement
 Scales: 6(10)
 -5(10)
2. Fixed Uiso
 At 1.2 times of:
  All C(H) groups
3. Restrained distances
 C8-C9 = C9-C10 = C10-C11 = C11-C12
 1.39 with sigma of 0.01
 C12-C13 = C13-C8
 1.39 with sigma of 0.01
 C8-C10 = C9-C11 = C10-C12
 2.4 with sigma of 0.01
 C11-C13 = C12-C8 = C13-C9
 2.4 with sigma of 0.01
 C8-C11 = C9-C12 = C10-C13
 2.8 with sigma of 0.01
 C8-C9A = C9A-C10A = C10A-C11
 1.39 with sigma of 0.01
 C11-C12A = C12A-C13A = C13A-C8
 1.39 with sigma of 0.01
 C8-C10A = C9A-C11 = C10A-C12A
 2.4 with sigma of 0.01
 C11-C13A = C12A-C8 = C13A-C9A
 2.4 with sigma of 0.01
 C9A-C12A = C10A-C13A
 2.8 with sigma of 0.01
 C15-C16 = C19-C22 = C28-C25
 1.5 with sigma of 0.01
 C30-C29 = C33-C36 = C39-C42
 1.5 with sigma of 0.01
 C16-C17 = C17-C18 = C18-C19
 1.39 with sigma of 0.01
 C19-C20 = C20-C21 = C21-C16
 1.39 with sigma of 0.01
 C16-C18 = C17-C19 = C18-C20
 2.4 with sigma of 0.01
 C19-C21 = C20-C16 = C21-C17
 2.4 with sigma of 0.01
 C16-C19 = C17-C20 = C18-C21
 2.8 with sigma of 0.01
 C22-C23 = C23-C24 = C24-C25
 1.39 with sigma of 0.01
 C25-C26 = C26-C27 = C27-C22
 1.39 with sigma of 0.01
 C22-C24 = C23-C25 = C24-C26
 2.4 with sigma of 0.01
 C25-C27 = C26-C22 = C27-C23
 2.4 with sigma of 0.01
 C22-C25 = C23-C26 = C24-C27
 2.8 with sigma of 0.01
 C30-C31 = C31-C32 = C32-C33
 1.39 with sigma of 0.01
 C33-C34 = C34-C35 = C35-C30
 1.39 with sigma of 0.01
 C30-C32 = C31-C33 = C32-C34
 2.4 with sigma of 0.01
 C33-C35 = C34-C30 = C35-C31
 2.4 with sigma of 0.01
 C30-C33 = C31-C34 = C32-C35
 2.8 with sigma of 0.01
 C36-C37 = C37-C38 = C38-C39
 1.39 with sigma of 0.01
 C39-C40 = C40-C41 = C41-C36
 1.39 with sigma of 0.01
 C36-C38 = C37-C39 = C38-C40
 2.4 with sigma of 0.01
 C39-C41 = C40-C36 = C41-C37
 2.4 with sigma of 0.01
 C36-C39 = C37-C40 = C38-C41
 2.8 with sigma of 0.01
 C28-C42
 1.26 with sigma of 0.02
 Zr5-O13
 2.2 with sigma of 0.02
 C28-C26 \\sim C28-C24
 with sigma of 0.02
 C42-C40 \\sim C42-C38
 with sigma of 0.02
 O11-O12 \\sim O13-O14
 with sigma of 0.02
 Zr4-O16 \\sim Zr3-O16
 with sigma of 0.03
4. Restrained planarity
 C8, C9, C10, C11, C12, C13
 with sigma of 0.01
 C8, C9A, C10A, C12A, C13A, C11
 with sigma of 0.01
 C16, C17, C18, C19, C20, C21
 with sigma of 0.01
 C22, C23, C24, C25, C26, C27, H26
 with sigma of 0.01
 C30, C31, C32, C33, C34, C35
 with sigma of 0.01
 C36, C37, C38, C39, C40, C41
 with sigma of 0.01
 Zr4, Zr5, O11, O12, O13, O14
 with sigma of 0.01
5. Rigid bond restraints
 C15, C16, C17, C18, C19, C20, C21, C22, C23, C24, C25, C26, C27, C28, C29,
 C30, C31, C32, C33, C34, C35, C36, C37, C38, C39, C40, C41, C42, O3, O4, O5, O6
 with sigma for 1-2 distances of 0.01 and sigma for 1-3 distances of 0.01
 C1, C2, C3, C4, C5, C6, C7, C8, C9, C10, C11, C12, C13, C14, C9A, C10A, C12A,
 C13A
 with sigma for 1-2 distances of 0.01 and sigma for 1-3 distances of 0.01
 Zr4, Zr5, O11, O12, O13, O14
 with sigma for 1-2 distances of 0.01 and sigma for 1-3 distances of 0.01
 Zr1, Zr2, O9, O10
 with sigma for 1-2 distances of 0.01 and sigma for 1-3 distances of 0.01
6. Uiso/Uaniso restraints and constraints
C15 \\sim C16 \\sim C17 \\sim C18 \\sim C19 \\sim C20 \\sim C21 \\sim C22 \\sim
C23 \\sim C24 \\sim C25 \\sim C26 \\sim C27 \\sim C28 \\sim C29 \\sim C30 \\sim
C31 \\sim C32 \\sim C33 \\sim C34 \\sim C35 \\sim C36 \\sim C37 \\sim C38 \\sim
C39 \\sim C40 \\sim C41 \\sim C42 \\sim O3 \\sim O4 \\sim O5 \\sim O6: within
2A with sigma of 0.01 and sigma for terminal atoms of 0.02
C1 \\sim C2 \\sim C3 \\sim C4 \\sim C5 \\sim C6 \\sim C7 \\sim C8 \\sim C9
\\sim C10 \\sim C11 \\sim C12 \\sim C13 \\sim C14 \\sim C9A \\sim C10A \\sim
C12A \\sim C13A: within 2A with sigma of 0.01 and sigma for terminal atoms of
0.02
Zr4 \\sim Zr5 \\sim O11 \\sim O12 \\sim O13 \\sim O14: within 2A with sigma of
0.01 and sigma for terminal atoms of 0.02
Zr1 \\sim Zr2 \\sim O9 \\sim O10: within 2A with sigma of 0.01 and sigma for
terminal atoms of 0.02
Uanis(C9) \\sim Ueq, Uanis(C10) \\sim Ueq, Uanis(C9A) \\sim Ueq, Uanis(C10A)
\\sim Ueq, Uanis(C28) \\sim Ueq, Uanis(O17) \\sim Ueq, Uanis(O13) \\sim Ueq,
Uanis(O1) \\sim Ueq, Uanis(O16) \\sim Ueq, Uanis(O10) \\sim Ueq: with sigma of
0.01 and sigma for terminal atoms of 0.02
Uanis(O8) \\sim Ueq: with sigma of 0.001 and sigma for terminal atoms of 0.002
7. Others
 Fixed Sof: Zr3(0.25) Zr4(0.25) Zr5(0.25) O3(0.5) O4(0.5) O5(0.5) O6(0.5)
 O11(0.25) O12(0.25) O13(0.25) O14(0.25) O15(0.5) O16(0.25) O17(0.25) C9(0.5)
 H9(0.5) C10(0.5) H10(0.5) C12(0.5) H12(0.5) C13(0.5) H13(0.5) C15(0.5)
 C16(0.5) C17(0.5) H17(0.5) C18(0.5) H18(0.5) C19(0.5) C20(0.5) H20(0.5)
 C21(0.5) H21(0.5) C22(0.5) C23(0.5) H23(0.5) C24(0.5) H24(0.5) C25(0.5)
 C26(0.5) H26(0.5) C27(0.5) H27(0.5) C29(0.5) C30(0.5) C31(0.5) H31(0.5)
 C32(0.5) H32(0.5) C33(0.5) C34(0.5) H34(0.5) C35(0.5) H35(0.5) C36(0.5)
 C37(0.5) H37(0.5) C38(0.5) H38(0.5) C39(0.5) C40(0.5) H40(0.5) C41(0.5)
 H41(0.5) C42(0.25) C9A(0.5) H9A(0.5) C10A(0.5) H10A(0.5) C12A(0.5) H12A(0.5)
 C13A(0.5) H13A(0.5)
8.a Riding coordinates:
 C26(H26)
8.b Aromatic/amide H refined with riding coordinates:
 C3(H3), C4(H4), C6(H6), C7(H7), C9(H9), C10(H10), C12(H12), C13(H13),
 C17(H17), C18(H18), C20(H20), C21(H21), C23(H23), C24(H24), C27(H27), C31(H31),
  C32(H32), C34(H34), C35(H35), C37(H37), C38(H38), C40(H40), C41(H41),
 C9A(H9A), C10A(H10A), C12A(H12A), C13A(H13A)
;
_atom_sites_solution_hydrogens     mixed
_atom_sites_solution_primary       dual
_atom_sites_solution_secondary     ?
loop_
  _atom_site_label
  _atom_site_type_symbol
  _atom_site_fract_x
  _atom_site_fract_y
  _atom_site_fract_z
  _atom_site_U_iso_or_equiv
  _atom_site_adp_type
  _atom_site_occupancy
  _atom_site_site_symmetry_order
  _atom_site_calc_flag
  _atom_site_refinement_flags_posn
  _atom_site_refinement_flags_adp
  _atom_site_refinement_flags_occupancy
  _atom_site_disorder_assembly
  _atom_site_disorder_group
 Zr1 Zr 0.41608(5) 0.0000 0.09832(5) 0.0244(4) Uani 1 2 d S TU P . .
 Zr2 Zr 0.5000 0.05782(3) 0.0000 0.0166(4) Uani 1 4 d S TU P . .
 Zr3 Zr 0.0000 0.05778(6) 0.45210(15) 0.0459(7) Uani 0.5 2 d DS T P A 1
 Zr4 Zr 0.08314(16) 0.0000 0.35263(18) 0.0523(8) Uani 0.5 2 d DS TU P A 1
 Zr5 Zr 0.08441(15) 0.0000 0.45010(16) 0.0476(7) Uani 0.5 2 d DS TU P B 2
 O1 O 0.3842(4) 0.04831(14) 0.1392(4) 0.0468(19) Uani 1 1 d . U . . .
 O2 O 0.4360(3) 0.08446(12) 0.0737(3) 0.0270(13) Uani 1 1 d . . . . .
 O3 O 0.0606(14) 0.0843(5) 0.3764(13) 0.094(4) Uani 0.5 1 d . U . A 1
 O4 O 0.1151(14) 0.0476(5) 0.3143(13) 0.100(4) Uani 0.5 1 d . U . A 1
 O5 O 0.1157(14) 0.0458(5) 0.4111(13) 0.097(4) Uani 0.5 1 d . U . B 2
 O6 O 0.0592(13) 0.0837(4) 0.4709(11) 0.093(4) Uani 0.5 1 d . U . B 2
 O7 O 0.3110(5) 0.0000 0.0971(6) 0.050(3) Uani 1 2 d S T P . .
 O8 O 0.4245(6) 0.0000 0.2264(7) 0.057(3) Uani 1 2 d S TU P . .
 O9 O 0.4194(7) 0.0267(3) 0.0000 0.066(4) Uani 1 2 d S TU P . .
 O10 O 0.5000 0.0268(3) 0.0986(7) 0.060(3) Uani 1 2 d S TU P . .
 O11 O 0.0846(11) 0.0000 0.2443(12) 0.055(4) Uani 0.5 2 d DS TU P A 1
 O12 O 0.1814(14) 0.0000 0.347(2) 0.108(7) Uani 0.5 2 d DS TU P A 1
 O13 O 0.1098(17) 0.0000 0.3293(11) 0.096(6) Uani 0.5 2 d DS TU P B 2
 O14 O 0.1881(14) 0.0000 0.4507(19) 0.107(8) Uani 0.5 2 d DS TU P B 2
 O15 O 0.0939(12) 0.0304(5) 0.4526(11) 0.089(7) Uani 0.5 1 d . . . A 1
 O16 O 0.0000 0.0291(7) 0.356(2) 0.123(13) Uani 0.5 2 d DS TU P A 1
 O17 O 0.0000 0.0295(5) 0.4524(15) 0.061(6) Uani 0.5 2 d S TU P B 2
 C1 C 0.4025(6) 0.0761(2) 0.1263(6) 0.040(2) Uani 1 1 d . U . . .
 C2 C 0.3839(6) 0.1007(2) 0.1817(6) 0.051(2) Uani 1 1 d . U . . .
 C3 C 0.3412(8) 0.0938(3) 0.2372(7) 0.071(3) Uani 1 1 d . U . . .
 H3 H 0.3234 0.0733 0.2407 0.085 Uiso 1 1 calc R . . . .
 C4 C 0.3238(8) 0.1175(3) 0.2892(7) 0.075(3) Uani 1 1 d . U . . .
 H4 H 0.2975 0.1124 0.3304 0.090 Uiso 1 1 calc R . . . .
 C5 C 0.3460(8) 0.1483(3) 0.2792(7) 0.065(2) Uani 1 1 d . U . . .
 C6 C 0.3883(8) 0.1542(3) 0.2243(7) 0.067(3) Uani 1 1 d . U . . .
 H6 H 0.4065 0.1746 0.2205 0.080 Uiso 1 1 calc R . . . .
 C7 C 0.4057(7) 0.1313(3) 0.1736(7) 0.060(3) Uani 1 1 d . U . . .
 H7 H 0.4327 0.1365 0.1332 0.072 Uiso 1 1 calc R . . . .
 C8 C 0.3239(5) 0.17445(19) 0.3309(5) 0.064(2) Uani 1 1 d D U . . .
 C9 C 0.2729(7) 0.1690(2) 0.3779(8) 0.066(3) Uani 0.5 1 d D U . C 1
 H9 H 0.2540 0.1487 0.3801 0.080 Uiso 0.5 1 calc R . . C 1
 C10 C 0.2496(6) 0.1934(3) 0.4219(8) 0.068(3) Uani 0.5 1 d D U . C 1
 H10 H 0.2148 0.1897 0.4542 0.082 Uiso 0.5 1 calc R . . C 1
 C11 C 0.2774(6) 0.2231(2) 0.4187(5) 0.067(2) Uani 1 1 d D U . . .
 C12 C 0.3285(7) 0.2286(2) 0.3716(8) 0.072(3) Uani 0.5 1 d D U . C 1
 H12 H 0.3475 0.2489 0.3695 0.087 Uiso 0.5 1 calc R . . C 1
 C13 C 0.3519(7) 0.2042(3) 0.3275(8) 0.071(3) Uani 0.5 1 d D U . C 1
 H13 H 0.3868 0.2079 0.2952 0.085 Uiso 0.5 1 calc R . . C 1
 C14 C 0.2500 0.2500 0.4622(9) 0.070(4) Uani 1 2 d S TU P C .
 C15 C 0.094(2) 0.0752(6) 0.3240(16) 0.098(3) Uani 0.5 1 d D U . A 1
 C16 C 0.1178(12) 0.1005(4) 0.2733(11) 0.100(3) Uani 0.5 1 d D U . A 1
 C17 C 0.0842(10) 0.1287(5) 0.2699(11) 0.101(3) Uani 0.5 1 d D U . A 1
 H17 H 0.0485 0.1320 0.3012 0.121 Uiso 0.5 1 calc R . . A 1
 C18 C 0.1030(11) 0.1523(4) 0.2207(12) 0.102(4) Uani 0.5 1 d D U . A 1
 H18 H 0.0802 0.1716 0.2183 0.122 Uiso 0.5 1 calc R . . A 1
 C19 C 0.1553(12) 0.1475(4) 0.1750(11) 0.101(3) Uani 0.5 1 d D U . A 1
 C20 C 0.1889(11) 0.1193(5) 0.1784(12) 0.103(4) Uani 0.5 1 d D U . A 1
 H20 H 0.2247 0.1161 0.1472 0.123 Uiso 0.5 1 calc R . . A 1
 C21 C 0.1701(12) 0.0957(4) 0.2275(12) 0.102(4) Uani 0.5 1 d D U . A 1
 H21 H 0.1929 0.0764 0.2298 0.122 Uiso 0.5 1 calc R . . A 1
 C22 C 0.1835(12) 0.1716(4) 0.1246(10) 0.100(3) Uani 0.5 1 d D U . A 1
 C23 C 0.2481(11) 0.1782(3) 0.1225(8) 0.100(4) Uani 0.5 1 d D U . A 1
 H23 H 0.2772 0.1653 0.1490 0.121 Uiso 0.5 1 calc R . . A 1
 C24 C 0.2701(8) 0.2038(4) 0.0814(10) 0.100(4) Uani 0.5 1 d D U . A 1
 H24 H 0.3142 0.2084 0.0798 0.120 Uiso 0.5 1 calc R . . A 1
 C25 C 0.2274(7) 0.2225(3) 0.0426(10) 0.100(4) Uani 0.5 1 d D U . A 1
 C26 C 0.1628(7) 0.2160(4) 0.0448(9) 0.100(4) Uani 0.5 1 d D U . A 1
 H26 H 0.1337 0.2288 0.0180 0.120 Uiso 0.5 1 d R . . A 1
 C27 C 0.1408(9) 0.1905(4) 0.0858(11) 0.100(4) Uani 0.5 1 d D U . . .
 H27 H 0.0967 0.1859 0.0872 0.120 Uiso 0.5 1 calc R . . A .
 C28 C 0.2500 0.2500 0.0000 0.099(5) Uani 1 4 d DS TU P A 1
 C29 C 0.100(2) 0.0761(6) 0.4201(16) 0.096(3) Uani 0.5 1 d D U . B 2
 C30 C 0.1174(13) 0.1017(4) 0.3662(10) 0.098(3) Uani 0.5 1 d D U . B 2
 C31 C 0.1505(12) 0.0942(3) 0.3017(11) 0.101(3) Uani 0.5 1 d D U . B 2
 H31 H 0.1612 0.0729 0.2914 0.121 Uiso 0.5 1 calc R . . B 2
 C32 C 0.1679(12) 0.1179(4) 0.2524(10) 0.102(3) Uani 0.5 1 d D U . B 2
 H32 H 0.1904 0.1127 0.2083 0.122 Uiso 0.5 1 calc R . . B 2
 C33 C 0.1524(13) 0.1491(4) 0.2671(10) 0.101(3) Uani 0.5 1 d D U . B 2
 C34 C 0.1192(13) 0.1566(3) 0.3318(12) 0.101(4) Uani 0.5 1 d D U . B 2
 H34 H 0.1084 0.1780 0.3421 0.121 Uiso 0.5 1 calc R . . B 2
 C35 C 0.1018(13) 0.1329(4) 0.3812(10) 0.098(4) Uani 0.5 1 d D U . B 2
 H35 H 0.0792 0.1380 0.4253 0.118 Uiso 0.5 1 calc R . . B 2
 C36 C 0.1766(12) 0.1747(4) 0.2156(11) 0.101(3) Uani 0.5 1 d D U . B 2
 C37 C 0.2237(12) 0.1684(3) 0.1635(11) 0.099(3) Uani 0.5 1 d D U . B 2
 H37 H 0.2393 0.1475 0.1578 0.119 Uiso 0.5 1 calc R . . B 2
 C38 C 0.2479(10) 0.1927(3) 0.1198(10) 0.099(3) Uani 0.5 1 d D U . B 2
 H38 H 0.2800 0.1882 0.0843 0.119 Uiso 0.5 1 calc R . . B 2
 C39 C 0.2254(11) 0.2235(3) 0.1276(10) 0.099(4) Uani 0.5 1 d D U . B 2
 C40 C 0.1781(11) 0.2296(4) 0.1799(11) 0.102(4) Uani 0.5 1 d D U . B 2
 H40 H 0.1624 0.2505 0.1857 0.122 Uiso 0.5 1 calc R . . B 2
 C41 C 0.1539(11) 0.2054(4) 0.2236(11) 0.103(4) Uani 0.5 1 d D U . B 2
 H41 H 0.1218 0.2098 0.2591 0.123 Uiso 0.5 1 calc R . . B 2
 C42 C 0.2500 0.2500 0.0765(9) 0.098(4) Uani 0.5 2 d DS TU P B 2
 C9A C 0.2589(6) 0.1797(3) 0.3348(8) 0.071(3) Uani 0.5 1 d D U . C 2
 H9A H 0.2305 0.1667 0.3076 0.085 Uiso 0.5 1 calc R . . C 2
 C10A C 0.2354(5) 0.2041(3) 0.3790(8) 0.072(3) Uani 0.5 1 d D U . C 2
 H10A H 0.1910 0.2078 0.3819 0.086 Uiso 0.5 1 calc R . . C 2
 C12A C 0.3422(6) 0.2177(3) 0.4147(8) 0.071(3) Uani 0.5 1 d D U . C 2
 H12A H 0.3707 0.2307 0.4420 0.086 Uiso 0.5 1 calc R . . C 2
 C13A C 0.3657(5) 0.1934(3) 0.3707(8) 0.071(3) Uani 0.5 1 d D U . C 2
 H13A H 0.4101 0.1897 0.3680 0.085 Uiso 0.5 1 calc R . . C 2

loop_
  _atom_site_aniso_label
  _atom_site_aniso_U_11
  _atom_site_aniso_U_22
  _atom_site_aniso_U_33
  _atom_site_aniso_U_23
  _atom_site_aniso_U_13
  _atom_site_aniso_U_12
 Zr1 0.0426(7) 0.0116(5) 0.0191(6) 0.000 0.0117(4) 0.000
 Zr2 0.0353(8) 0.0042(6) 0.0104(6) 0.000 0.000 0.000
 Zr3 0.0605(17) 0.0346(14) 0.0426(15) 0.0001(11) 0.000 0.000
 Zr4 0.067(2) 0.0324(13) 0.0575(17) 0.000 0.0237(15) 0.000
 Zr5 0.0629(17) 0.0303(13) 0.0495(15) 0.000 0.0142(13) 0.000
 O1 0.070(5) 0.016(3) 0.055(4) -0.009(3) 0.034(4) 0.004(3)
 O2 0.045(4) 0.013(3) 0.023(3) -0.005(2) 0.006(3) 0.006(3)
 O3 0.153(9) 0.055(6) 0.074(6) -0.006(5) 0.042(6) -0.030(6)
 O4 0.155(10) 0.060(6) 0.084(8) -0.005(6) 0.050(8) -0.029(7)
 O5 0.153(10) 0.057(6) 0.082(8) -0.008(6) 0.047(8) -0.027(7)
 O6 0.153(10) 0.053(6) 0.072(7) -0.011(6) 0.041(7) -0.030(7)
 O7 0.045(6) 0.038(5) 0.067(7) 0.000 0.020(5) 0.000
 O8 0.061(3) 0.060(3) 0.051(3) 0.000 0.000(2) 0.000
 O9 0.125(10) 0.055(7) 0.018(4) 0.000 0.000 -0.055(7)
 O10 0.045(5) 0.052(6) 0.084(7) 0.049(5) 0.000 0.000
 O11 0.078(10) 0.030(8) 0.056(7) 0.000 0.040(8) 0.000
 O12 0.072(8) 0.132(16) 0.118(14) 0.000 0.017(11) 0.000
 O13 0.099(11) 0.103(11) 0.087(8) 0.000 0.030(9) 0.000
 O14 0.062(8) 0.14(2) 0.120(16) 0.000 0.021(12) 0.000
 O15 0.13(2) 0.058(12) 0.074(13) 0.032(10) 0.038(13) 0.046(12)
 O16 0.116(15) 0.127(16) 0.124(16) -0.002(10) 0.000 0.000
 O17 0.069(10) 0.040(9) 0.073(10) -0.014(8) 0.000 0.000
 C1 0.067(6) 0.013(4) 0.039(5) -0.004(4) 0.018(5) 0.010(4)
 C2 0.087(6) 0.024(4) 0.040(4) -0.008(3) 0.026(4) 0.009(4)
 C3 0.117(7) 0.033(4) 0.061(5) -0.012(4) 0.047(5) 0.011(5)
 C4 0.128(7) 0.041(4) 0.057(5) -0.011(4) 0.046(5) 0.014(5)
 C5 0.117(6) 0.035(4) 0.045(4) -0.008(4) 0.024(4) 0.022(4)
 C6 0.112(7) 0.031(4) 0.057(5) -0.016(4) 0.025(5) 0.006(5)
 C7 0.099(7) 0.032(4) 0.050(5) -0.018(4) 0.025(5) 0.000(5)
 C8 0.110(5) 0.039(4) 0.043(4) -0.006(3) 0.014(4) 0.025(4)
 C9 0.096(6) 0.051(5) 0.052(5) -0.009(4) 0.011(5) 0.024(5)
 C10 0.099(6) 0.053(5) 0.053(5) -0.008(4) 0.010(5) 0.027(5)
 C11 0.122(6) 0.042(4) 0.037(4) 0.001(3) 0.006(4) 0.037(4)
 C12 0.124(7) 0.043(5) 0.050(6) -0.006(5) 0.012(5) 0.026(6)
 C13 0.120(7) 0.042(5) 0.049(6) -0.007(5) 0.014(6) 0.023(5)
 C14 0.135(9) 0.045(6) 0.030(6) 0.000 0.000 0.049(7)
 C15 0.157(8) 0.059(5) 0.077(6) -0.009(5) 0.043(6) -0.030(6)
 C16 0.161(8) 0.062(5) 0.075(6) -0.005(5) 0.040(6) -0.033(6)
 C17 0.165(8) 0.065(5) 0.074(6) -0.004(5) 0.035(6) -0.032(6)
 C18 0.165(8) 0.068(6) 0.073(7) -0.002(6) 0.030(6) -0.033(6)
 C19 0.164(7) 0.068(5) 0.071(6) -0.002(5) 0.029(5) -0.037(6)
 C20 0.165(9) 0.068(6) 0.076(7) -0.004(6) 0.038(7) -0.036(7)
 C21 0.164(8) 0.064(6) 0.078(7) -0.006(6) 0.041(6) -0.033(6)
 C22 0.159(8) 0.074(6) 0.068(6) 0.002(5) 0.019(5) -0.041(6)
 C23 0.157(8) 0.079(6) 0.066(6) 0.004(5) 0.016(6) -0.041(6)
 C24 0.153(8) 0.080(7) 0.066(7) 0.004(5) 0.011(6) -0.044(7)
 C25 0.150(8) 0.080(6) 0.070(6) 0.002(4) 0.006(5) -0.041(6)
 C26 0.153(9) 0.078(8) 0.069(8) 0.005(7) 0.006(8) -0.045(8)
 C27 0.157(9) 0.077(8) 0.067(8) 0.003(7) 0.014(8) -0.041(8)
 C28 0.133(8) 0.084(7) 0.080(7) 0.000 0.000 -0.033(7)
 C29 0.155(8) 0.056(5) 0.076(6) -0.008(5) 0.044(6) -0.030(6)
 C30 0.159(8) 0.058(5) 0.076(6) -0.007(5) 0.042(6) -0.032(6)
 C31 0.162(8) 0.063(5) 0.077(6) -0.007(5) 0.042(6) -0.032(6)
 C32 0.164(8) 0.065(5) 0.076(6) -0.006(5) 0.037(6) -0.034(6)
 C33 0.165(8) 0.066(5) 0.072(6) -0.004(5) 0.033(6) -0.034(6)
 C34 0.166(9) 0.063(6) 0.073(7) -0.003(6) 0.035(7) -0.031(7)
 C35 0.162(10) 0.058(6) 0.075(8) -0.002(6) 0.040(8) -0.030(8)
 C36 0.165(8) 0.070(5) 0.070(6) -0.002(5) 0.026(5) -0.037(6)
 C37 0.159(8) 0.073(6) 0.065(6) 0.003(5) 0.021(6) -0.039(6)
 C38 0.156(8) 0.077(6) 0.065(6) 0.003(5) 0.014(5) -0.043(6)
 C39 0.155(8) 0.077(6) 0.066(6) 0.002(5) 0.008(5) -0.040(6)
 C40 0.167(10) 0.071(7) 0.068(8) 0.003(7) 0.014(7) -0.038(8)
 C41 0.170(10) 0.068(7) 0.070(8) 0.004(7) 0.019(7) -0.033(8)
 C42 0.146(9) 0.078(7) 0.069(7) 0.000 0.000 -0.041(8)
 C9A 0.101(5) 0.054(5) 0.057(5) -0.009(4) 0.009(5) 0.023(5)
 C10A 0.103(6) 0.057(5) 0.055(5) -0.006(4) 0.010(5) 0.025(5)
 C12A 0.120(6) 0.047(6) 0.048(6) -0.008(5) 0.007(6) 0.025(6)
 C13A 0.117(6) 0.045(6) 0.050(6) -0.010(5) 0.008(6) 0.026(5)

_geom_special_details
;
 All esds (except the esd in the dihedral angle between two l.s. planes)
 are estimated using the full covariance matrix.  The cell esds are taken
 into account individually in the estimation of esds in distances, angles
 and torsion angles; correlations between esds in cell parameters are only
 used when they are defined by crystal symmetry.  An approximate (isotropic)
 treatment of cell esds is used for estimating esds involving l.s. planes.
;
loop_
  _geom_bond_atom_site_label_1
  _geom_bond_atom_site_label_2
  _geom_bond_distance
  _geom_bond_site_symmetry_2
  _geom_bond_publ_flag
 Zr1 Zr1 3.5422(19) 10 ?
 Zr1 Zr1 3.536(2) 2_655 ?
 Zr1 Zr2 3.5018(10) . ?
 Zr1 Zr2 3.5019(10) 9_655 ?
 Zr1 O1 2.277(6) 12 ?
 Zr1 O1 2.277(6) . ?
 Zr1 O7 2.213(11) . ?
 Zr1 O8 2.315(12) . ?
 Zr1 O9 2.103(6) 3 ?
 Zr1 O9 2.103(6) . ?
 Zr1 O10 2.101(6) . ?
 Zr1 O10 2.101(6) 2_655 ?
 Zr2 Zr1 3.5019(10) 9_655 ?
 Zr2 Zr1 3.5019(10) 10 ?
 Zr2 Zr1 3.5019(10) 2_655 ?
 Zr2 O2 2.203(6) . ?
 Zr2 O2 2.202(6) 4_655 ?
 Zr2 O2 2.202(6) 11_655 ?
 Zr2 O2 2.202(6) 10 ?
 Zr2 O9 2.149(11) . ?
 Zr2 O9 2.149(11) 11_655 ?
 Zr2 O10 2.209(10) . ?
 Zr2 O10 2.209(10) 10 ?
 Zr3 Zr3 1.726(6) 10_556 ?
 Zr3 Zr4 3.503(3) . ?
 Zr3 Zr4 3.503(3) 2 ?
 Zr3 O3 2.18(2) . ?
 Zr3 O3 2.18(2) 11 ?
 Zr3 O15 2.29(2) . ?
 Zr3 O15 2.29(2) 11 ?
 Zr3 O16 2.12(2) . ?
 Zr4 Zr3 3.503(3) 2 ?
 Zr4 Zr4 3.502(7) 2 ?
 Zr4 O4 2.24(2) 12 ?
 Zr4 O4 2.24(2) . ?
 Zr4 O11 1.95(2) . ?
 Zr4 O12 2.07(3) . ?
 Zr4 O15 2.22(2) . ?
 Zr4 O15 2.22(2) 12 ?
 Zr4 O16 2.141(17) 2 ?
 Zr4 O16 2.141(17) . ?
 Zr5 Zr5 1.798(6) 10_556 ?
 Zr5 Zr5 3.556(6) 2 ?
 Zr5 O5 2.16(2) 12 ?
 Zr5 O5 2.16(2) . ?
 Zr5 O13 2.240(18) . ?
 Zr5 O14 2.19(3) . ?
 Zr5 O17 2.174(13) . ?
 Zr5 O17 2.174(13) 2 ?
 O1 C1 1.260(11) . ?
 O2 C1 1.234(12) . ?
 O3 C15 1.23(4) . ?
 O4 C15 1.27(4) . ?
 O5 C29 1.34(4) . ?
 O6 O6 1.05(4) 10_556 ?
 O6 C29 1.29(4) . ?
 O9 Zr1 2.103(6) 10 ?
 O10 Zr1 2.102(6) 2_655 ?
 O14 O14 1.78(7) 10_556 ?
 O15 O15 1.71(4) 10_556 ?
 O16 Zr4 2.141(17) 2 ?
 O17 Zr5 2.174(13) 2 ?
 O17 O17 1.71(5) 10_556 ?
 C1 C2 1.496(12) . ?
 C2 C3 1.375(16) . ?
 C2 C7 1.383(15) . ?
 C3 C4 1.420(15) . ?
 C4 C5 1.396(18) . ?
 C5 C6 1.355(18) . ?
 C5 C8 1.521(12) . ?
 C6 C7 1.382(15) . ?
 C8 C9 1.388(8) . ?
 C8 C13 1.395(8) . ?
 C8 C9A 1.390(8) . ?
 C8 C13A 1.390(8) . ?
 C9 C10 1.391(8) . ?
 C10 C11 1.389(8) . ?
 C11 C12 1.390(8) . ?
 C11 C14 1.499(10) . ?
 C11 C10A 1.392(8) . ?
 C11 C12A 1.386(8) . ?
 C12 C13 1.391(8) . ?
 C14 C11 1.499(10) 6 ?
 C14 C14 1.36(3) 13_556 ?
 C15 C16 1.497(10) . ?
 C16 C17 1.390(8) . ?
 C16 C21 1.391(8) . ?
 C17 C18 1.392(8) . ?
 C18 C19 1.389(8) . ?
 C19 C20 1.389(8) . ?
 C19 C22 1.489(9) . ?
 C20 C21 1.391(8) . ?
 C22 C23 1.391(8) . ?
 C22 C27 1.392(8) . ?
 C23 C24 1.391(8) . ?
 C24 C25 1.388(8) . ?
 C25 C25 1.54(3) 10 ?
 C25 C26 1.389(8) . ?
 C25 C28 1.473(8) . ?
 C26 C26 1.61(3) 10 ?
 C26 C27 1.390(8) . ?
 C28 C25 1.474(8) 13 ?
 C28 C25 1.474(8) 10 ?
 C28 C25 1.474(8) 6 ?
 C29 C30 1.504(10) . ?
 C30 C31 1.393(8) . ?
 C30 C35 1.387(8) . ?
 C31 C32 1.388(8) . ?
 C32 C33 1.390(8) . ?
 C33 C34 1.395(8) . ?
 C33 C36 1.516(9) . ?
 C34 C35 1.393(8) . ?
 C36 C37 1.392(8) . ?
 C36 C41 1.391(8) . ?
 C37 C38 1.391(8) . ?
 C38 C39 1.396(8) . ?
 C39 C40 1.395(8) . ?
 C39 C42 1.542(9) . ?
 C40 C41 1.390(8) . ?
 C42 C39 1.542(9) 6 ?
 C9A C10A 1.395(8) . ?
 C12A C13A 1.392(8) . ?

loop_
  _geom_angle_atom_site_label_1
  _geom_angle_atom_site_label_2
  _geom_angle_atom_site_label_3
  _geom_angle
  _geom_angle_site_symmetry_1
  _geom_angle_site_symmetry_3
  _geom_angle_publ_flag
 Zr1 Zr1 Zr1 90.000(1) 2_655 10 ?
 Zr2 Zr1 Zr1 59.620(17) 9_655 10 ?
 Zr2 Zr1 Zr1 59.619(17) . 10 ?
 Zr2 Zr1 Zr1 59.681(19) . 2_655 ?
 Zr2 Zr1 Zr1 59.682(19) 9_655 2_655 ?
 Zr2 Zr1 Zr2 88.78(3) . 9_655 ?
 O1 Zr1 Zr1 107.2(2) 12 2_655 ?
 O1 Zr1 Zr1 108.9(2) . 10 ?
 O1 Zr1 Zr1 108.9(2) 12 10 ?
 O1 Zr1 Zr1 107.2(2) . 2_655 ?
 O1 Zr1 Zr2 71.56(17) 12 9_655 ?
 O1 Zr1 Zr2 160.31(17) 12 . ?
 O1 Zr1 Zr2 160.31(17) . 9_655 ?
 O1 Zr1 Zr2 71.56(17) . . ?
 O1 Zr1 O1 128.1(3) 12 . ?
 O1 Zr1 O8 72.6(2) . . ?
 O1 Zr1 O8 72.6(2) 12 . ?
 O7 Zr1 Zr1 89.4(3) . 10 ?
 O7 Zr1 Zr1 179.4(3) . 2_655 ?
 O7 Zr1 Zr2 119.99(18) . 9_655 ?
 O7 Zr1 Zr2 119.99(18) . . ?
 O7 Zr1 O1 73.0(2) . 12 ?
 O7 Zr1 O1 73.0(2) . . ?
 O7 Zr1 O8 95.0(4) . . ?
 O8 Zr1 Zr1 175.6(3) . 10 ?
 O8 Zr1 Zr1 85.6(3) . 2_655 ?
 O8 Zr1 Zr2 117.73(19) . . ?
 O8 Zr1 Zr2 117.73(19) . 9_655 ?
 O9 Zr1 Zr1 32.6(3) 3 10 ?
 O9 Zr1 Zr1 32.6(3) . 10 ?
 O9 Zr1 Zr1 88.1(4) 3 2_655 ?
 O9 Zr1 Zr1 88.1(4) . 2_655 ?
 O9 Zr1 Zr2 86.2(4) 3 . ?
 O9 Zr1 Zr2 35.0(3) . . ?
 O9 Zr1 Zr2 86.2(4) . 9_655 ?
 O9 Zr1 Zr2 35.0(3) 3 9_655 ?
 O9 Zr1 O1 78.4(4) . . ?
 O9 Zr1 O1 140.0(3) . 12 ?
 O9 Zr1 O1 78.4(4) 3 12 ?
 O9 Zr1 O1 140.0(3) 3 . ?
 O9 Zr1 O7 91.4(5) . . ?
 O9 Zr1 O7 91.4(5) 3 . ?
 O9 Zr1 O8 146.8(3) . . ?
 O9 Zr1 O8 146.8(3) 3 . ?
 O9 Zr1 O9 65.1(6) . 3 ?
 O10 Zr1 Zr1 32.7(3) 2_655 2_655 ?
 O10 Zr1 Zr1 90.2(4) 2_655 10 ?
 O10 Zr1 Zr1 32.7(3) . 2_655 ?
 O10 Zr1 Zr1 90.2(4) . 10 ?
 O10 Zr1 Zr2 87.4(3) 2_655 . ?
 O10 Zr1 Zr2 87.4(3) . 9_655 ?
 O10 Zr1 Zr2 36.7(3) 2_655 9_655 ?
 O10 Zr1 Zr2 36.7(3) . . ?
 O10 Zr1 O1 137.2(3) 2_655 . ?
 O10 Zr1 O1 137.2(3) . 12 ?
 O10 Zr1 O1 76.2(4) . . ?
 O10 Zr1 O1 76.2(4) 2_655 12 ?
 O10 Zr1 O7 147.3(3) . . ?
 O10 Zr1 O7 147.3(3) 2_655 . ?
 O10 Zr1 O8 86.1(4) . . ?
 O10 Zr1 O8 86.1(4) 2_655 . ?
 O10 Zr1 O9 105.4(6) . 3 ?
 O10 Zr1 O9 71.5(4) 2_655 3 ?
 O10 Zr1 O9 105.4(6) 2_655 . ?
 O10 Zr1 O9 71.5(4) . . ?
 O10 Zr1 O10 65.5(5) 2_655 . ?
 Zr1 Zr2 Zr1 60.76(3) . 10 ?
 Zr1 Zr2 Zr1 60.76(3) 9_655 2_655 ?
 Zr1 Zr2 Zr1 91.22(3) . 9_655 ?
 Zr1 Zr2 Zr1 91.22(3) 10 2_655 ?
 Zr1 Zr2 Zr1 60.64(4) 10 9_655 ?
 Zr1 Zr2 Zr1 60.64(4) . 2_655 ?
 O2 Zr2 Zr1 110.75(16) . 10 ?
 O2 Zr2 Zr1 75.22(15) 11_655 2_655 ?
 O2 Zr2 Zr1 166.43(15) 11_655 10 ?
 O2 Zr2 Zr1 75.23(15) . . ?
 O2 Zr2 Zr1 110.75(16) 4_655 2_655 ?
 O2 Zr2 Zr1 110.75(16) 11_655 9_655 ?
 O2 Zr2 Zr1 75.22(15) 10 10 ?
 O2 Zr2 Zr1 111.27(15) 10 9_655 ?
 O2 Zr2 Zr1 166.43(15) 10 2_655 ?
 O2 Zr2 Zr1 75.22(15) 4_655 9_655 ?
 O2 Zr2 Zr1 111.27(15) . 2_655 ?
 O2 Zr2 Zr1 166.44(15) . 9_655 ?
 O2 Zr2 Zr1 111.27(15) 11_655 . ?
 O2 Zr2 Zr1 110.75(16) 10 . ?
 O2 Zr2 Zr1 111.27(15) 4_655 10 ?
 O2 Zr2 Zr1 166.43(15) 4_655 . ?
 O2 Zr2 O2 118.3(3) 11_655 10 ?
 O2 Zr2 O2 118.3(3) 4_655 . ?
 O2 Zr2 O2 74.1(3) 10 . ?
 O2 Zr2 O2 75.5(3) 10 4_655 ?
 O2 Zr2 O2 75.5(3) 11_655 . ?
 O2 Zr2 O2 74.1(3) 11_655 4_655 ?
 O2 Zr2 O10 79.6(3) . . ?
 O2 Zr2 O10 142.10(17) . 10 ?
 O2 Zr2 O10 142.10(17) 10 . ?
 O2 Zr2 O10 142.10(17) 11_655 10 ?
 O2 Zr2 O10 79.6(3) 11_655 . ?
 O2 Zr2 O10 142.10(17) 4_655 . ?
 O2 Zr2 O10 79.6(3) 4_655 10 ?
 O2 Zr2 O10 79.6(3) 10 10 ?
 O9 Zr2 Zr1 34.13(18) . 10 ?
 O9 Zr2 Zr1 88.3(4) 11_655 . ?
 O9 Zr2 Zr1 88.3(4) 11_655 10 ?
 O9 Zr2 Zr1 34.13(18) 11_655 2_655 ?
 O9 Zr2 Zr1 34.13(18) . . ?
 O9 Zr2 Zr1 88.3(4) . 2_655 ?
 O9 Zr2 Zr1 34.13(18) 11_655 9_655 ?
 O9 Zr2 Zr1 88.3(4) . 9_655 ?
 O9 Zr2 O2 142.91(16) . 4_655 ?
 O9 Zr2 O2 142.91(16) 11_655 . ?
 O9 Zr2 O2 80.3(4) 11_655 4_655 ?
 O9 Zr2 O2 80.3(4) 11_655 11_655 ?
 O9 Zr2 O2 80.3(4) . 10 ?
 O9 Zr2 O2 142.91(16) . 11_655 ?
 O9 Zr2 O2 142.91(16) 11_655 10 ?
 O9 Zr2 O2 80.3(4) . . ?
 O9 Zr2 O9 104.3(8) 11_655 . ?
 O9 Zr2 O10 68.6(3) 11_655 . ?
 O9 Zr2 O10 68.6(3) 11_655 10 ?
 O9 Zr2 O10 68.6(3) . 10 ?
 O9 Zr2 O10 68.6(3) . . ?
 O10 Zr2 Zr1 89.5(3) 10 . ?
 O10 Zr2 Zr1 89.5(3) . 10 ?
 O10 Zr2 Zr1 34.66(17) 10 10 ?
 O10 Zr2 Zr1 34.66(17) . . ?
 O10 Zr2 Zr1 89.5(3) . 9_655 ?
 O10 Zr2 Zr1 34.66(17) . 2_655 ?
 O10 Zr2 Zr1 34.66(17) 10 9_655 ?
 O10 Zr2 Zr1 89.5(3) 10 2_655 ?
 O10 Zr2 O10 107.0(7) . 10 ?
 Zr3 Zr3 Zr4 120.76(6) 10_556 2 ?
 Zr3 Zr3 Zr4 120.76(6) 10_556 . ?
 Zr3 Zr3 O3 128.7(7) 10_556 . ?
 Zr3 Zr3 O3 128.7(7) 10_556 11 ?
 Zr3 Zr3 O15 89.8(5) 10_556 . ?
 Zr3 Zr3 O15 89.8(5) 10_556 11 ?
 Zr3 Zr3 O16 145.0(12) 10_556 . ?
 Zr4 Zr3 Zr4 59.99(11) 2 . ?
 O3 Zr3 Zr4 75.4(6) . . ?
 O3 Zr3 Zr4 75.4(6) 11 2 ?
 O3 Zr3 Zr4 109.5(6) 11 . ?
 O3 Zr3 Zr4 109.5(6) . 2 ?
 O3 Zr3 O3 71.7(16) 11 . ?
 O3 Zr3 O15 140.2(9) . 11 ?
 O3 Zr3 O15 76.1(9) . . ?
 O3 Zr3 O15 140.2(9) 11 . ?
 O3 Zr3 O15 76.1(9) 11 11 ?
 O15 Zr3 Zr4 94.5(6) . 2 ?
 O15 Zr3 Zr4 94.5(6) 11 . ?
 O15 Zr3 Zr4 38.5(6) 11 2 ?
 O15 Zr3 Zr4 38.5(6) . . ?
 O15 Zr3 O15 119.1(12) . 11 ?
 O16 Zr3 Zr4 34.9(6) . 2 ?
 O16 Zr3 Zr4 34.9(6) . . ?
 O16 Zr3 O3 77.5(11) . 11 ?
 O16 Zr3 O3 77.5(11) . . ?
 O16 Zr3 O15 73.3(8) . . ?
 O16 Zr3 O15 73.3(8) . 11 ?
 Zr3 Zr4 Zr3 88.67(10) 2 . ?
 Zr4 Zr4 Zr3 60.00(6) 2 2 ?
 Zr4 Zr4 Zr3 60.00(6) 2 . ?
 O4 Zr4 Zr3 71.2(6) 12 2 ?
 O4 Zr4 Zr3 159.9(6) 12 . ?
 O4 Zr4 Zr3 71.2(6) . . ?
 O4 Zr4 Zr3 159.9(6) . 2 ?
 O4 Zr4 Zr4 107.5(8) . 2 ?
 O4 Zr4 Zr4 107.5(8) 12 2 ?
 O4 Zr4 O4 128.9(12) 12 . ?
 O11 Zr4 Zr3 121.3(4) . . ?
 O11 Zr4 Zr3 121.3(4) . 2 ?
 O11 Zr4 Zr4 90.9(7) . 2 ?
 O11 Zr4 O4 71.8(6) . . ?
 O11 Zr4 O4 71.8(6) . 12 ?
 O11 Zr4 O12 86.3(11) . . ?
 O11 Zr4 O15 143.9(5) . 12 ?
 O11 Zr4 O15 143.9(5) . . ?
 O11 Zr4 O16 92.2(12) . 2 ?
 O11 Zr4 O16 92.2(12) . . ?
 O12 Zr4 Zr3 121.7(6) . . ?
 O12 Zr4 Zr3 121.7(6) . 2 ?
 O12 Zr4 Zr4 177.1(10) . 2 ?
 O12 Zr4 O4 71.6(8) . . ?
 O12 Zr4 O4 71.6(8) . 12 ?
 O12 Zr4 O15 86.5(10) . 12 ?
 O12 Zr4 O15 86.5(10) . . ?
 O12 Zr4 O16 144.9(7) . 2 ?
 O12 Zr4 O16 144.9(7) . . ?
 O15 Zr4 Zr3 39.9(6) . . ?
 O15 Zr4 Zr3 39.9(6) 12 2 ?
 O15 Zr4 Zr3 92.3(5) . 2 ?
 O15 Zr4 Zr3 92.3(5) 12 . ?
 O15 Zr4 Zr4 95.8(6) . 2 ?
 O15 Zr4 Zr4 95.8(6) 12 2 ?
 O15 Zr4 O4 137.8(8) . 12 ?
 O15 Zr4 O4 137.8(8) 12 . ?
 O15 Zr4 O4 72.4(8) . . ?
 O15 Zr4 O4 72.4(8) 12 12 ?
 O15 Zr4 O15 70.6(9) 12 . ?
 O16 Zr4 Zr3 88.8(10) . 2 ?
 O16 Zr4 Zr3 34.5(7) 2 2 ?
 O16 Zr4 Zr3 34.5(7) . . ?
 O16 Zr4 Zr3 88.8(10) 2 . ?
 O16 Zr4 Zr4 35.1(6) . 2 ?
 O16 Zr4 Zr4 35.1(6) 2 2 ?
 O16 Zr4 O4 74.7(11) 2 12 ?
 O16 Zr4 O4 140.7(9) . 12 ?
 O16 Zr4 O4 74.7(11) . . ?
 O16 Zr4 O4 140.7(9) 2 . ?
 O16 Zr4 O15 74.3(9) 2 12 ?
 O16 Zr4 O15 113.2(13) . 12 ?
 O16 Zr4 O15 74.3(9) . . ?
 O16 Zr4 O15 113.2(13) 2 . ?
 O16 Zr4 O16 70.2(14) . 2 ?
 Zr5 Zr5 Zr5 90.0 10_556 2 ?
 Zr5 Zr5 O5 108.9(6) 10_556 . ?
 Zr5 Zr5 O5 108.9(6) 10_556 12 ?
 Zr5 Zr5 O13 166.2(9) 10_556 . ?
 Zr5 Zr5 O14 89.7(9) 10_556 . ?
 Zr5 Zr5 O17 88.9(7) 10_556 2 ?
 Zr5 Zr5 O17 88.9(7) 10_556 . ?
 O5 Zr5 Zr5 107.7(8) . 2 ?
 O5 Zr5 Zr5 107.7(8) 12 2 ?
 O5 Zr5 O5 127.2(12) . 12 ?
 O5 Zr5 O13 67.2(6) . . ?
 O5 Zr5 O13 67.2(6) 12 . ?
 O5 Zr5 O14 72.4(9) 12 . ?
 O5 Zr5 O14 72.4(9) . . ?
 O5 Zr5 O17 140.4(10) . 2 ?
 O5 Zr5 O17 74.9(9) 12 2 ?
 O5 Zr5 O17 140.4(10) 12 . ?
 O5 Zr5 O17 74.9(9) . . ?
 O13 Zr5 Zr5 103.8(9) . 2 ?
 O14 Zr5 Zr5 179.7(9) . 2 ?
 O14 Zr5 O13 76.5(11) . . ?
 O17 Zr5 Zr5 35.1(5) . 2 ?
 O17 Zr5 Zr5 35.1(5) 2 2 ?
 O17 Zr5 O13 102.4(10) . . ?
 O17 Zr5 O13 102.4(10) 2 . ?
 O17 Zr5 O14 144.8(5) . . ?
 O17 Zr5 O14 144.8(5) 2 . ?
 O17 Zr5 O17 70.2(10) 2 . ?
 C1 O1 Zr1 133.5(6) . . ?
 C1 O2 Zr2 131.7(5) . . ?
 C15 O3 Zr3 130.3(16) . . ?
 C15 O4 Zr4 133.1(19) . . ?
 C29 O5 Zr5 138(2) . . ?
 O6 O6 C29 135(2) 10_556 . ?
 Zr1 O9 Zr1 114.8(5) 10 . ?
 Zr1 O9 Zr2 110.9(4) . . ?
 Zr1 O9 Zr2 110.9(4) 10 . ?
 Zr1 O10 Zr1 114.5(5) . 2_655 ?
 Zr1 O10 Zr2 108.6(4) . . ?
 Zr1 O10 Zr2 108.6(4) 2_655 . ?
 O14 O14 Zr5 90.3(9) 10_556 . ?
 Zr4 O15 Zr3 101.7(10) . . ?
 O15 O15 Zr3 90.2(5) 10_556 . ?
 O15 O15 Zr4 144.1(5) 10_556 . ?
 Zr3 O16 Zr4 110.6(12) . . ?
 Zr3 O16 Zr4 110.6(12) . 2 ?
 Zr4 O16 Zr4 109.7(13) 2 . ?
 Zr5 O17 Zr5 109.7(9) . 2 ?
 O17 O17 Zr5 91.1(7) 10_556 . ?
 O17 O17 Zr5 91.1(7) 10_556 2 ?
 O1 C1 C2 116.5(9) . . ?
 O2 C1 O1 125.9(8) . . ?
 O2 C1 C2 117.5(8) . . ?
 C3 C2 C1 120.7(10) . . ?
 C3 C2 C7 119.4(10) . . ?
 C7 C2 C1 119.7(10) . . ?
 C2 C3 C4 120.0(12) . . ?
 C5 C4 C3 119.1(12) . . ?
 C4 C5 C8 120.0(11) . . ?
 C6 C5 C4 119.1(10) . . ?
 C6 C5 C8 120.9(11) . . ?
 C5 C6 C7 121.9(12) . . ?
 C6 C7 C2 120.0(11) . . ?
 C9 C8 C5 119.3(9) . . ?
 C9 C8 C13 120.3(5) . . ?
 C13 C8 C5 120.3(9) . . ?
 C9A C8 C5 116.7(10) . . ?
 C9A C8 C13A 120.3(5) . . ?
 C13A C8 C5 123.0(10) . . ?
 C8 C9 C10 119.9(5) . . ?
 C11 C10 C9 120.0(5) . . ?
 C10 C11 C12 120.2(5) . . ?
 C10 C11 C14 120.3(8) . . ?
 C12 C11 C14 119.4(8) . . ?
 C10A C11 C14 117.6(8) . . ?
 C12A C11 C14 122.1(8) . . ?
 C12A C11 C10A 120.3(5) . . ?
 C11 C12 C13 120.0(5) . . ?
 C12 C13 C8 119.7(5) . . ?
 C11 C14 C11 116.9(13) 6 . ?
 C14 C14 C11 121.5(6) 13_556 6 ?
 C14 C14 C11 121.5(6) 13_556 . ?
 O3 C15 O4 126.5(19) . . ?
 O3 C15 C16 116(3) . . ?
 O4 C15 C16 117(3) . . ?
 C17 C16 C15 118(2) . . ?
 C17 C16 C21 120.2(5) . . ?
 C21 C16 C15 122(2) . . ?
 C16 C17 C18 119.9(5) . . ?
 C19 C18 C17 119.9(5) . . ?
 C18 C19 C22 125.2(18) . . ?
 C20 C19 C18 120.2(5) . . ?
 C20 C19 C22 114.4(18) . . ?
 C19 C20 C21 120.0(5) . . ?
 C16 C21 C20 119.8(5) . . ?
 C23 C22 C19 123.1(18) . . ?
 C23 C22 C27 120.1(5) . . ?
 C27 C22 C19 116.3(18) . . ?
 C22 C23 C24 119.9(5) . . ?
 C25 C24 C23 119.8(5) . . ?
 C24 C25 C25 120.2(5) . 10 ?
 C24 C25 C26 120.5(5) . . ?
 C24 C25 C28 120.3(9) . . ?
 C26 C25 C25 91.6(7) . 10 ?
 C26 C25 C28 119.2(9) . . ?
 C28 C25 C25 58.6(8) . 10 ?
 C25 C26 C26 88.4(7) . 10 ?
 C25 C26 C27 119.7(5) . . ?
 C27 C26 C26 122.1(7) . 10 ?
 C26 C27 C22 120.0(5) . . ?
 C25 C28 C25 62.8(15) 6 13 ?
 C25 C28 C25 180.0(9) 10 6 ?
 C25 C28 C25 180.0 . 13 ?
 C25 C28 C25 117.2(15) . 6 ?
 C25 C28 C25 62.8(15) . 10 ?
 C25 C28 C25 117.2(15) 10 13 ?
 O5 C29 C30 124(3) . . ?
 O6 C29 O5 119.5(17) . . ?
 O6 C29 C30 116(3) . . ?
 C31 C30 C29 119.8(18) . . ?
 C35 C30 C29 120.2(18) . . ?
 C35 C30 C31 120.0(5) . . ?
 C32 C31 C30 120.0(5) . . ?
 C31 C32 C33 120.3(5) . . ?
 C32 C33 C34 119.6(5) . . ?
 C32 C33 C36 119.1(16) . . ?
 C34 C33 C36 121.1(15) . . ?
 C35 C34 C33 120.1(5) . . ?
 C30 C35 C34 120.0(5) . . ?
 C37 C36 C33 121.0(15) . . ?
 C41 C36 C33 119.3(15) . . ?
 C41 C36 C37 119.6(5) . . ?
 C38 C37 C36 120.1(5) . . ?
 C37 C38 C39 120.6(5) . . ?
 C38 C39 C42 120.5(9) . . ?
 C40 C39 C38 119.0(5) . . ?
 C40 C39 C42 120.5(9) . . ?
 C41 C40 C39 120.5(5) . . ?
 C40 C41 C36 120.3(5) . . ?
 C39 C42 C39 106.8(18) 6 . ?
 C8 C9A C10A 119.8(5) . . ?
 C11 C10A C9A 119.7(5) . . ?
 C11 C12A C13A 120.0(5) . . ?
 C8 C13A C12A 119.8(5) . . ?

_shelx_fab_file
;
 0 0 2 602.53 0.00
 0 0 3 56.03 0.00
 0 0 4 173.66 0.00
 0 0 5 21.48 0.00
 0 0 6 96.05 0.00
 0 0 7 76.24 0.00
 0 0 8 109.69 0.00
 0 0 9 24.05 0.00
 0 0 10 -11.64 0.00
 0 0 11 6.57 0.00
 0 0 12 4.66 0.00
 0 0 13 6.20 0.00
 0 0 14 -5.41 0.00
 0 0 15 8.72 0.00
 0 0 16 10.99 0.00
 0 0 17 3.67 0.00
 0 0 18 -2.08 0.00
 0 0 19 2.92 0.00
 0 0 20 -2.77 0.00
 0 2 2 11.62 0.00
 0 2 3 133.75 0.00
 0 2 4 -84.44 0.00
 0 2 5 22.72 0.00
 0 2 6 -43.61 0.00
 0 2 7 6.50 0.00
 0 2 8 30.07 0.00
 0 2 9 -13.80 0.00
 0 2 10 7.17 0.00
 0 2 11 -1.02 0.00
 0 2 12 16.94 0.00
 0 2 13 -23.36 0.00
 0 2 14 7.88 0.00
 0 2 15 14.79 0.00
 0 2 16 8.91 0.00
 0 2 17 7.82 0.00
 0 2 18 -3.41 0.00
 0 2 19 9.33 0.00
 0 2 20 -6.81 0.00
 0 4 0 189.51 0.00
 0 4 1 -61.03 0.00
 0 4 2 -343.20 0.00
 0 4 3 -61.68 0.00
 0 4 4 -175.14 0.00
 0 4 5 -56.28 0.00
 0 4 6 -104.78 0.00
 0 4 7 15.39 0.00
 0 4 8 -13.62 0.00
 0 4 9 13.31 0.00
 0 4 10 -10.31 0.00
 0 4 11 -12.29 0.00
 0 4 12 19.74 0.00
 0 4 13 4.67 0.00
 0 4 14 -6.77 0.00
 0 4 15 7.12 0.00
 0 4 16 -6.49 0.00
 0 4 17 -12.47 0.00
 0 4 18 11.87 0.00
 0 4 19 0.30 0.00
 0 4 20 -8.74 0.00
 0 6 0 -170.67 0.00
 0 6 1 10.87 0.00
 0 6 2 -0.08 0.00
 0 6 3 -0.05 0.00
 0 6 4 27.40 0.00
 0 6 5 -40.43 0.00
 0 6 6 14.52 0.00
 0 6 7 34.29 0.00
 0 6 8 -38.95 0.00
 0 6 9 30.05 0.00
 0 6 10 -3.50 0.00
 0 6 11 10.07 0.00
 0 6 12 12.81 0.00
 0 6 13 -4.69 0.00
 0 6 14 7.65 0.00
 0 6 15 12.45 0.00
 0 6 16 -3.26 0.00
 0 6 17 -4.21 0.00
 0 6 18 12.02 0.00
 0 6 19 -9.19 0.00
 0 6 20 -6.67 0.00
 0 8 0 -106.05 0.00
 0 8 1 19.27 0.00
 0 8 2 -33.44 0.00
 0 8 3 -37.93 0.00
 0 8 4 80.54 0.00
 0 8 5 1.96 0.00
 0 8 6 49.79 0.00
 0 8 7 -14.07 0.00
 0 8 8 14.75 0.00
 0 8 9 5.48 0.00
 0 8 10 -1.76 0.00
 0 8 11 5.64 0.00
 0 8 12 26.60 0.00
 0 8 13 4.97 0.00
 0 8 14 1.15 0.00
 0 8 15 10.06 0.00
 0 8 16 -15.59 0.00
 0 8 17 4.50 0.00
 0 8 18 8.24 0.00
 0 8 19 -1.83 0.00
 0 8 20 -10.07 0.00
 0 10 0 -124.77 0.00
 0 10 1 7.07 0.00
 0 10 2 38.80 0.00
 0 10 3 -30.39 0.00
 0 10 4 75.06 0.00
 0 10 5 -46.09 0.00
 0 10 6 97.37 0.00
 0 10 7 -31.78 0.00
 0 10 8 -15.12 0.00
 0 10 9 2.37 0.00
 0 10 10 -9.14 0.00
 0 10 11 11.55 0.00
 0 10 12 1.28 0.00
 0 10 13 -9.44 0.00
 0 10 14 3.96 0.00
 0 10 15 -0.35 0.00
 0 10 16 -11.35 0.00
 0 10 17 6.04 0.00
 0 10 18 1.19 0.00
 0 10 19 0.45 0.00
 0 10 20 -3.52 0.00
 0 12 0 -141.37 0.00
 0 12 1 -12.96 0.00
 0 12 2 -21.63 0.00
 0 12 3 -20.73 0.00
 0 12 4 51.97 0.00
 0 12 5 19.56 0.00
 0 12 6 26.45 0.00
 0 12 7 -20.01 0.00
 0 12 8 2.85 0.00
 0 12 9 13.23 0.00
 0 12 10 -29.94 0.00
 0 12 11 22.63 0.00
 0 12 12 3.21 0.00
 0 12 13 1.17 0.00
 0 12 14 3.74 0.00
 0 12 15 -11.60 0.00
 0 12 16 7.81 0.00
 0 12 17 -7.00 0.00
 0 12 18 1.34 0.00
 0 12 19 3.69 0.00
 0 12 20 2.51 0.00
 0 14 0 -18.76 0.00
 0 14 1 24.48 0.00
 0 14 2 14.98 0.00
 0 14 3 35.88 0.00
 0 14 4 -17.27 0.00
 0 14 5 9.04 0.00
 0 14 6 15.97 0.00
 0 14 7 -4.32 0.00
 0 14 8 14.53 0.00
 0 14 9 3.51 0.00
 0 14 10 2.55 0.00
 0 14 11 -8.19 0.00
 0 14 12 -3.35 0.00
 0 14 13 -6.75 0.00
 0 14 14 -2.06 0.00
 0 14 15 -4.12 0.00
 0 14 16 0.34 0.00
 0 14 17 -0.70 0.00
 0 14 18 -4.74 0.00
 0 14 19 5.66 0.00
 0 14 20 4.46 0.00
 0 16 0 4.58 0.00
 0 16 1 68.87 0.00
 0 16 2 20.92 0.00
 0 16 3 9.61 0.00
 0 16 4 41.74 0.00
 0 16 5 45.43 0.00
 0 16 6 10.09 0.00
 0 16 7 11.33 0.00
 0 16 8 -0.76 0.00
 0 16 9 -13.18 0.00
 0 16 10 -25.98 0.00
 0 16 11 -4.47 0.00
 0 16 12 7.49 0.00
 0 16 13 8.68 0.00
 0 16 14 -12.28 0.00
 0 16 15 0.84 0.00
 0 16 16 13.46 0.00
 0 16 17 -8.49 0.00
 0 16 18 -8.55 0.00
 0 16 19 -0.01 0.00
 0 16 20 5.31 0.00
 0 18 0 43.07 0.00
 0 18 1 5.85 0.00
 0 18 2 25.40 0.00
 0 18 3 -27.93 0.00
 0 18 4 -34.82 0.00
 0 18 5 -24.82 0.00
 0 18 6 6.15 0.00
 0 18 7 4.44 0.00
 0 18 8 5.76 0.00
 0 18 9 -8.76 0.00
 0 18 10 8.32 0.00
 0 18 11 -15.51 0.00
 0 18 12 -0.93 0.00
 0 18 13 9.87 0.00
 0 18 14 -12.10 0.00
 0 18 15 7.56 0.00
 0 18 16 -9.39 0.00
 0 18 17 -1.47 0.00
 0 18 18 -6.88 0.00
 0 18 19 3.16 0.00
 0 20 0 17.05 0.00
 0 20 1 41.05 0.00
 0 20 2 18.08 0.00
 0 20 3 -37.44 0.00
 0 20 4 -5.49 0.00
 0 20 5 1.85 0.00
 0 20 6 -7.56 0.00
 0 20 7 -20.52 0.00
 0 20 8 22.24 0.00
 0 20 9 -17.75 0.00
 0 20 10 20.11 0.00
 0 20 11 -16.42 0.00
 0 20 12 26.36 0.00
 0 20 13 1.19 0.00
 0 20 14 -13.42 0.00
 0 20 15 4.09 0.00
 0 20 16 1.12 0.00
 0 20 17 -4.19 0.00
 0 20 18 -5.23 0.00
 0 20 19 0.39 0.00
 0 22 0 15.41 0.00
 0 22 1 25.01 0.00
 0 22 2 26.85 0.00
 0 22 3 -15.65 0.00
 0 22 4 -31.87 0.00
 0 22 5 5.57 0.00
 0 22 6 4.39 0.00
 0 22 7 18.19 0.00
 0 22 8 -20.07 0.00
 0 22 9 12.49 0.00
 0 22 10 -3.18 0.00
 0 22 11 0.84 0.00
 0 22 12 -2.01 0.00
 0 22 13 9.13 0.00
 0 22 14 2.88 0.00
 0 22 15 4.91 0.00
 0 22 16 6.00 0.00
 0 22 17 -1.01 0.00
 0 22 18 6.24 0.00
 0 24 0 -33.40 0.00
 0 24 1 21.41 0.00
 0 24 2 -18.00 0.00
 0 24 3 -12.10 0.00
 0 24 4 -25.68 0.00
 0 24 5 9.20 0.00
 0 24 6 6.80 0.00
 0 24 7 -7.88 0.00
 0 24 8 -1.87 0.00
 0 24 9 9.04 0.00
 0 24 10 5.06 0.00
 0 24 11 0.76 0.00
 0 24 12 21.25 0.00
 0 24 13 -3.02 0.00
 0 24 14 11.80 0.00
 0 24 15 -0.34 0.00
 0 24 16 -0.04 0.00
 0 24 17 -4.53 0.00
 0 24 18 3.48 0.00
 0 26 0 6.42 0.00
 0 26 1 -7.72 0.00
 0 26 2 16.22 0.00
 0 26 3 -14.81 0.00
 0 26 4 -10.87 0.00
 0 26 5 -11.73 0.00
 0 26 6 28.58 0.00
 0 26 7 -5.98 0.00
 0 26 8 -6.69 0.00
 0 26 9 -2.22 0.00
 0 26 10 6.08 0.00
 0 26 11 0.84 0.00
 0 26 12 2.21 0.00
 0 26 13 5.32 0.00
 0 26 14 7.51 0.00
 0 26 15 0.73 0.00
 0 26 16 -10.65 0.00
 0 26 17 3.12 0.00
 0 28 0 -3.39 0.00
 0 28 1 -22.19 0.00
 0 28 2 -1.17 0.00
 0 28 3 -3.24 0.00
 0 28 4 -4.96 0.00
 0 28 5 4.57 0.00
 0 28 6 12.60 0.00
 0 28 7 -0.12 0.00
 0 28 8 1.07 0.00
 0 28 9 14.98 0.00
 0 28 10 -3.04 0.00
 0 28 11 -5.54 0.00
 0 28 12 -3.61 0.00
 0 28 13 -6.72 0.00
 0 28 14 -3.69 0.00
 0 28 15 -1.72 0.00
 0 28 16 -1.88 0.00
 0 30 0 -4.34 0.00
 0 30 1 -14.90 0.00
 0 30 2 10.70 0.00
 0 30 3 2.87 0.00
 0 30 4 14.77 0.00
 0 30 5 -1.31 0.00
 0 30 6 6.24 0.00
 0 30 7 2.04 0.00
 0 30 8 -13.18 0.00
 0 30 9 9.71 0.00
 0 30 10 -11.39 0.00
 0 30 11 4.19 0.00
 0 30 12 -8.38 0.00
 0 30 13 1.22 0.00
 0 30 14 -5.78 0.00
 0 30 15 -2.24 0.00
 0 32 0 -8.32 0.00
 0 32 1 17.43 0.00
 0 32 2 -3.43 0.00
 0 32 3 18.35 0.00
 0 32 4 2.94 0.00
 0 32 5 7.51 0.00
 0 32 6 4.94 0.00
 0 32 7 -4.93 0.00
 0 32 8 6.76 0.00
 0 32 9 -0.31 0.00
 0 32 10 -4.35 0.00
 0 32 11 -7.15 0.00
 0 32 12 0.57 0.00
 0 32 13 2.58 0.00
 0 32 14 -3.70 0.00
 0 34 0 -14.22 0.00
 0 34 1 -5.11 0.00
 0 34 2 -7.72 0.00
 0 34 3 0.39 0.00
 0 34 4 1.42 0.00
 0 34 5 -1.68 0.00
 0 34 6 -16.03 0.00
 0 34 7 -5.60 0.00
 0 34 8 -0.08 0.00
 0 34 9 -3.32 0.00
 0 34 10 2.49 0.00
 0 34 11 1.34 0.00
 0 34 12 -0.96 0.00
 0 34 13 -5.04 0.00
 0 34 15 5.99 0.00
 0 36 0 21.31 0.00
 0 36 1 -3.47 0.00
 0 36 2 7.39 0.00
 0 36 3 1.59 0.00
 0 36 4 1.21 0.00
 0 36 5 2.73 0.00
 0 36 6 -8.24 0.00
 0 36 7 4.87 0.00
 0 36 8 2.38 0.00
 0 36 9 -6.76 0.00
 0 36 10 -6.13 0.00
 0 36 11 1.13 0.00
 0 36 12 -5.46 0.00
 0 36 13 -5.74 0.00
 0 36 14 3.92 0.00
 0 38 0 11.24 0.00
 0 38 1 11.97 0.00
 0 38 2 1.04 0.00
 0 38 3 -1.18 0.00
 0 38 4 5.62 0.00
 0 38 5 5.65 0.00
 0 38 6 -17.42 0.00
 0 38 7 10.81 0.00
 0 38 8 -4.42 0.00
 0 38 9 -6.33 0.00
 0 38 10 -7.24 0.00
 0 38 11 3.65 0.00
 0 38 12 5.49 0.00
 0 38 13 -7.47 0.00
 0 40 0 16.34 0.00
 0 40 1 0.29 0.00
 0 40 2 -3.56 0.00
 0 40 3 -0.20 0.00
 0 40 4 5.07 0.00
 0 40 5 -2.65 0.00
 0 40 6 -3.09 0.00
 0 40 7 5.00 0.00
 0 40 8 6.56 0.00
 0 40 9 -3.53 0.00
 0 40 10 -5.10 0.00
 0 40 11 7.19 0.00
 0 40 12 7.36 0.00
 0 42 0 4.71 0.00
 0 42 1 7.86 0.00
 0 42 2 -1.37 0.00
 0 42 3 4.35 0.00
 0 42 4 9.08 0.00
 0 42 5 -2.90 0.00
 0 42 6 2.70 0.00
 0 42 7 5.93 0.00
 0 42 8 14.55 0.00
 0 42 9 -1.52 0.00
 0 42 10 10.10 0.00
 0 42 11 7.47 0.00
 0 44 0 2.55 0.00
 0 44 1 18.53 0.00
 0 44 2 -1.09 0.00
 0 44 3 9.29 0.00
 0 44 4 -1.57 0.00
 0 44 5 0.12 0.00
 0 44 6 -0.35 0.00
 0 44 7 3.78 0.00
 0 44 8 4.62 0.00
 0 44 9 -2.81 0.00
 0 44 10 -3.14 0.00
 0 46 0 -8.41 0.00
 0 46 1 8.14 0.00
 0 46 2 2.98 0.00
 0 46 3 -0.21 0.00
 0 46 4 -5.79 0.00
 0 46 5 -9.95 0.00
 0 46 6 -2.56 0.00
 0 46 7 -0.77 0.00
 0 46 8 1.85 0.00
 0 48 0 -10.07 0.00
 0 48 1 -4.21 0.00
 0 48 2 -5.80 0.00
 0 48 3 -7.39 0.00
 0 48 4 -4.41 0.00
 0 48 5 -8.05 0.00
 1 1 2 -66.23 0.00
 1 1 3 -169.71 0.00
 1 1 4 -43.63 0.00
 1 1 5 -36.77 0.00
 1 1 6 -7.39 0.00
 1 1 7 -1.61 0.00
 1 1 8 -1.10 0.00
 1 1 9 12.01 0.00
 1 1 10 16.21 0.00
 1 1 11 -4.03 0.00
 1 1 12 -15.43 0.00
 1 1 13 9.48 0.00
 1 1 14 1.19 0.00
 1 1 15 8.80 0.00
 1 1 16 4.09 0.00
 1 1 17 0.31 0.00
 1 1 18 0.76 0.00
 1 1 19 -0.85 0.00
 1 1 20 4.26 0.00
 1 3 0 54.25 0.00
 1 3 1 238.72 0.00
 1 3 2 180.28 0.00
 1 3 3 -3.36 0.00
 1 3 4 46.72 0.00
 1 3 5 82.77 0.00
 1 3 6 34.30 0.00
 1 3 7 23.65 0.00
 1 3 8 41.71 0.00
 1 3 9 7.78 0.00
 1 3 10 25.31 0.00
 1 3 11 8.81 0.00
 1 3 12 -3.15 0.00
 1 3 13 -3.87 0.00
 1 3 14 10.35 0.00
 1 3 15 -1.72 0.00
 1 3 16 0.46 0.00
 1 3 17 2.63 0.00
 1 3 18 -6.15 0.00
 1 3 19 0.00 0.00
 1 3 20 10.94 0.00
 1 5 0 -13.68 0.00
 1 5 1 -152.92 0.00
 1 5 2 -60.77 0.00
 1 5 3 -15.69 0.00
 1 5 4 14.19 0.00
 1 5 5 -15.45 0.00
 1 5 6 15.12 0.00
 1 5 7 -7.59 0.00
 1 5 8 37.50 0.00
 1 5 9 -21.11 0.00
 1 5 10 7.29 0.00
 1 5 11 3.02 0.00
 1 5 12 -3.30 0.00
 1 5 13 20.10 0.00
 1 5 14 12.58 0.00
 1 5 15 -4.61 0.00
 1 5 16 4.52 0.00
 1 5 17 7.02 0.00
 1 5 18 -7.57 0.00
 1 5 19 5.07 0.00
 1 5 20 8.02 0.00
 1 7 0 -13.23 0.00
 1 7 1 79.92 0.00
 1 7 2 -14.26 0.00
 1 7 3 5.74 0.00
 1 7 4 -93.49 0.00
 1 7 5 -14.94 0.00
 1 7 6 -48.03 0.00
 1 7 7 11.09 0.00
 1 7 8 14.30 0.00
 1 7 9 -7.06 0.00
 1 7 10 -17.41 0.00
 1 7 11 15.92 0.00
 1 7 12 -17.58 0.00
 1 7 13 9.00 0.00
 1 7 14 -4.34 0.00
 1 7 15 -11.85 0.00
 1 7 16 3.90 0.00
 1 7 17 1.14 0.00
 1 7 18 -4.27 0.00
 1 7 19 1.30 0.00
 1 7 20 -0.01 0.00
 1 9 0 42.13 0.00
 1 9 1 -40.40 0.00
 1 9 2 -46.22 0.00
 1 9 3 92.48 0.00
 1 9 4 68.25 0.00
 1 9 5 31.71 0.00
 1 9 6 2.11 0.00
 1 9 7 26.64 0.00
 1 9 8 -5.35 0.00
 1 9 9 -17.92 0.00
 1 9 10 -3.94 0.00
 1 9 11 4.00 0.00
 1 9 12 9.83 0.00
 1 9 13 16.34 0.00
 1 9 14 -7.22 0.00
 1 9 15 -6.73 0.00
 1 9 16 4.31 0.00
 1 9 17 1.50 0.00
 1 9 18 -1.98 0.00
 1 9 19 -2.29 0.00
 1 9 20 -2.46 0.00
 1 11 0 85.97 0.00
 1 11 1 -4.44 0.00
 1 11 2 41.93 0.00
 1 11 3 -24.52 0.00
 1 11 4 19.12 0.00
 1 11 5 9.60 0.00
 1 11 6 -22.29 0.00
 1 11 7 31.26 0.00
 1 11 8 2.79 0.00
 1 11 9 -2.76 0.00
 1 11 10 -0.44 0.00
 1 11 11 -4.45 0.00
 1 11 12 14.56 0.00
 1 11 13 8.58 0.00
 1 11 14 -0.12 0.00
 1 11 15 -1.22 0.00
 1 11 16 6.90 0.00
 1 11 17 -0.47 0.00
 1 11 18 7.01 0.00
 1 11 19 -3.84 0.00
 1 11 20 3.24 0.00
 1 13 0 -15.49 0.00
 1 13 1 5.22 0.00
 1 13 2 -2.83 0.00
 1 13 3 54.00 0.00
 1 13 4 53.14 0.00
 1 13 5 2.67 0.00
 1 13 6 -15.22 0.00
 1 13 7 4.18 0.00
 1 13 8 -11.24 0.00
 1 13 9 9.81 0.00
 1 13 10 -0.41 0.00
 1 13 11 -3.80 0.00
 1 13 12 6.47 0.00
 1 13 13 -10.73 0.00
 1 13 14 -9.78 0.00
 1 13 15 -2.28 0.00
 1 13 16 -3.89 0.00
 1 13 17 -3.12 0.00
 1 13 18 3.91 0.00
 1 13 19 2.40 0.00
 1 13 20 -0.11 0.00
 1 15 0 47.17 0.00
 1 15 1 -16.08 0.00
 1 15 2 6.75 0.00
 1 15 3 -26.26 0.00
 1 15 4 -7.30 0.00
 1 15 5 3.26 0.00
 1 15 6 6.34 0.00
 1 15 7 0.47 0.00
 1 15 8 -1.60 0.00
 1 15 9 -1.46 0.00
 1 15 10 -4.77 0.00
 1 15 11 0.76 0.00
 1 15 12 3.65 0.00
 1 15 13 -4.48 0.00
 1 15 14 1.55 0.00
 1 15 15 7.24 0.00
 1 15 16 -6.19 0.00
 1 15 17 5.55 0.00
 1 15 18 4.27 0.00
 1 15 19 -0.16 0.00
 1 15 20 3.30 0.00
 1 17 0 -6.64 0.00
 1 17 1 -18.03 0.00
 1 17 2 11.66 0.00
 1 17 3 19.06 0.00
 1 17 4 -6.85 0.00
 1 17 5 22.18 0.00
 1 17 6 0.50 0.00
 1 17 7 23.39 0.00
 1 17 8 -11.61 0.00
 1 17 9 12.80 0.00
 1 17 10 -10.18 0.00
 1 17 11 6.25 0.00
 1 17 12 -3.66 0.00
 1 17 13 -1.40 0.00
 1 17 14 8.67 0.00
 1 17 15 -0.69 0.00
 1 17 16 -3.36 0.00
 1 17 17 -11.35 0.00
 1 17 18 -0.33 0.00
 1 17 19 -1.50 0.00
 1 19 0 43.10 0.00
 1 19 1 8.87 0.00
 1 19 2 1.19 0.00
 1 19 3 3.93 0.00
 1 19 4 -33.93 0.00
 1 19 5 12.39 0.00
 1 19 6 15.66 0.00
 1 19 7 3.73 0.00
 1 19 8 6.27 0.00
 1 19 9 5.90 0.00
 1 19 10 3.32 0.00
 1 19 11 5.62 0.00
 1 19 12 -2.78 0.00
 1 19 13 -3.15 0.00
 1 19 14 8.44 0.00
 1 19 15 -5.31 0.00
 1 19 16 -5.76 0.00
 1 19 17 -2.77 0.00
 1 19 18 -1.47 0.00
 1 19 19 1.44 0.00
 1 21 1 0.90 0.00
 1 21 2 -12.86 0.00
 1 21 3 -3.61 0.00
 1 21 4 -10.81 0.00
 1 21 5 -20.04 0.00
 1 21 6 6.27 0.00
 1 21 7 -6.06 0.00
 1 21 8 6.45 0.00
 1 21 9 -14.99 0.00
 1 21 10 7.10 0.00
 1 21 11 -11.36 0.00
 1 21 12 -5.46 0.00
 1 21 13 -13.44 0.00
 1 21 14 6.30 0.00
 1 21 15 -3.45 0.00
 1 21 16 0.32 0.00
 1 21 17 3.74 0.00
 1 21 18 -3.01 0.00
 1 21 19 1.41 0.00
 1 23 0 38.14 0.00
 1 23 1 -3.89 0.00
 1 23 2 3.95 0.00
 1 23 3 12.01 0.00
 1 23 4 -9.25 0.00
 1 23 5 2.35 0.00
 1 23 6 -1.18 0.00
 1 23 7 -4.52 0.00
 1 23 8 -5.21 0.00
 1 23 9 -12.96 0.00
 1 23 10 -7.15 0.00
 1 23 11 1.06 0.00
 1 23 12 -2.72 0.00
 1 23 13 9.81 0.00
 1 23 14 1.73 0.00
 1 23 15 -0.39 0.00
 1 23 16 -0.98 0.00
 1 23 17 -2.59 0.00
 1 23 18 -4.76 0.00
 1 25 0 16.67 0.00
 1 25 1 7.47 0.00
 1 25 2 -3.21 0.00
 1 25 3 -15.59 0.00
 1 25 4 7.42 0.00
 1 25 5 -6.67 0.00
 1 25 6 -6.88 0.00
 1 25 7 0.80 0.00
 1 25 8 8.11 0.00
 1 25 9 -8.88 0.00
 1 25 10 -3.25 0.00
 1 25 11 -3.59 0.00
 1 25 12 2.92 0.00
 1 25 13 -2.50 0.00
 1 25 14 -1.01 0.00
 1 25 15 -0.22 0.00
 1 25 16 5.53 0.00
 1 25 17 -5.94 0.00
 1 25 18 -4.46 0.00
 1 27 0 -3.17 0.00
 1 27 1 3.97 0.00
 1 27 2 -7.71 0.00
 1 27 3 0.17 0.00
 1 27 4 1.72 0.00
 1 27 5 -1.09 0.00
 1 27 6 -5.19 0.00
 1 27 7 0.05 0.00
 1 27 8 -0.41 0.00
 1 27 9 2.31 0.00
 1 27 10 -3.36 0.00
 1 27 11 7.09 0.00
 1 27 12 2.64 0.00
 1 27 13 1.77 0.00
 1 27 14 -1.62 0.00
 1 27 15 -1.91 0.00
 1 27 16 1.25 0.00
 1 27 17 -5.42 0.00
 1 29 0 -23.43 0.00
 1 29 1 8.78 0.00
 1 29 2 -5.81 0.00
 1 29 3 -1.32 0.00
 1 29 4 10.23 0.00
 1 29 5 -3.84 0.00
 1 29 6 3.35 0.00
 1 29 7 5.93 0.00
 1 29 8 15.84 0.00
 1 29 9 2.52 0.00
 1 29 10 -2.11 0.00
 1 29 11 -4.17 0.00
 1 29 12 -2.22 0.00
 1 29 13 3.70 0.00
 1 29 14 -3.76 0.00
 1 29 15 0.49 0.00
 1 29 16 -2.76 0.00
 1 31 0 -24.16 0.00
 1 31 1 -12.76 0.00
 1 31 2 -9.52 0.00
 1 31 3 -3.99 0.00
 1 31 4 -8.61 0.00
 1 31 5 6.10 0.00
 1 31 6 -2.27 0.00
 1 31 7 2.65 0.00
 1 31 8 -3.27 0.00
 1 31 9 -1.64 0.00
 1 31 10 7.59 0.00
 1 31 11 1.56 0.00
 1 31 12 1.16 0.00
 1 31 13 -0.70 0.00
 1 31 14 5.97 0.00
 1 31 15 -3.13 0.00
 1 33 0 2.96 0.00
 1 33 1 2.90 0.00
 1 33 2 6.89 0.00
 1 33 3 5.64 0.00
 1 33 4 -2.51 0.00
 1 33 5 2.92 0.00
 1 33 6 3.23 0.00
 1 33 7 7.26 0.00
 1 33 8 -4.58 0.00
 1 33 9 -4.94 0.00
 1 33 10 1.62 0.00
 1 33 11 -0.55 0.00
 1 33 12 -2.22 0.00
 1 33 13 -0.11 0.00
 1 33 14 5.22 0.00
 1 35 0 5.33 0.00
 1 35 1 -0.63 0.00
 1 35 2 17.39 0.00
 1 35 3 1.17 0.00
 1 35 4 3.49 0.00
 1 35 5 -1.62 0.00
 1 35 6 11.38 0.00
 1 35 7 7.76 0.00
 1 35 8 -5.86 0.00
 1 35 9 7.34 0.00
 1 35 10 3.07 0.00
 1 35 11 3.06 0.00
 1 35 12 -6.30 0.00
 1 35 13 6.66 0.00
 1 35 14 -1.98 0.00
 1 35 15 12.47 0.00
 1 37 0 4.36 0.00
 1 37 1 -2.27 0.00
 1 37 2 -6.24 0.00
 1 37 3 -0.08 0.00
 1 37 4 -12.07 0.00
 1 37 5 2.76 0.00
 1 37 6 10.43 0.00
 1 37 7 -8.13 0.00
 1 37 8 -2.05 0.00
 1 37 9 -6.82 0.00
 1 37 10 5.29 0.00
 1 37 11 -2.37 0.00
 1 37 12 -4.17 0.00
 1 37 13 -2.06 0.00
 1 37 14 -3.88 0.00
 1 39 0 12.62 0.00
 1 39 1 -1.81 0.00
 1 39 2 0.72 0.00
 1 39 3 -1.80 0.00
 1 39 4 -11.02 0.00
 1 39 5 -0.20 0.00
 1 39 6 4.56 0.00
 1 39 7 4.03 0.00
 1 39 8 -3.77 0.00
 1 39 9 6.21 0.00
 1 39 10 -2.21 0.00
 1 39 11 -5.95 0.00
 1 39 12 2.85 0.00
 1 39 13 4.53 0.00
 1 41 0 9.05 0.00
 1 41 1 3.28 0.00
 1 41 2 6.95 0.00
 1 41 3 5.12 0.00
 1 41 4 0.64 0.00
 1 41 5 0.23 0.00
 1 41 6 2.39 0.00
 1 41 7 -11.28 0.00
 1 41 8 0.96 0.00
 1 41 9 2.99 0.00
 1 41 10 3.50 0.00
 1 41 11 0.59 0.00
 1 41 12 -1.14 0.00
 1 43 0 4.82 0.00
 1 43 1 3.37 0.00
 1 43 2 1.37 0.00
 1 43 3 -3.73 0.00
 1 43 4 -0.64 0.00
 1 43 5 2.41 0.00
 1 43 6 1.66 0.00
 1 43 7 1.24 0.00
 1 43 8 -1.38 0.00
 1 43 9 9.97 0.00
 1 43 10 4.04 0.00
 1 45 0 5.07 0.00
 1 45 1 -5.85 0.00
 1 45 2 4.85 0.00
 1 45 3 -0.11 0.00
 1 45 4 -1.34 0.00
 1 45 5 -3.66 0.00
 1 45 6 -3.12 0.00
 1 45 7 3.52 0.00
 1 45 8 5.55 0.00
 1 45 9 3.93 0.00
 1 47 0 2.21 0.00
 1 47 1 1.93 0.00
 1 47 2 6.04 0.00
 1 47 3 2.29 0.00
 1 47 4 2.29 0.00
 1 47 5 0.14 0.00
 1 47 6 -0.51 0.00
 1 47 7 -2.77 0.00
 1 49 0 6.75 0.00
 1 49 1 11.29 0.00
 1 49 2 3.45 0.00
 1 49 3 1.26 0.00
 2 0 1 1.73 0.00
 2 0 2 -173.70 0.00
 2 0 3 -69.02 0.00
 2 0 4 -80.90 0.00
 2 0 5 -44.48 0.00
 2 0 6 -1.29 0.00
 2 0 7 15.73 0.00
 2 0 8 -20.26 0.00
 2 0 9 30.49 0.00
 2 0 10 -40.07 0.00
 2 0 11 13.36 0.00
 2 0 12 6.54 0.00
 2 0 13 7.70 0.00
 2 0 14 -9.58 0.00
 2 0 15 -0.10 0.00
 2 0 16 15.72 0.00
 2 0 17 -7.61 0.00
 2 0 18 -3.81 0.00
 2 0 19 -2.12 0.00
 2 0 20 4.01 0.00
 2 2 0 -586.24 0.00
 2 2 1 1.10 0.00
 2 2 2 -151.70 0.00
 2 2 3 50.39 0.00
 2 2 4 -29.92 0.00
 2 2 5 -0.81 0.00
 2 2 6 26.11 0.00
 2 2 7 -16.44 0.00
 2 2 8 -7.40 0.00
 2 2 9 20.12 0.00
 2 2 10 -6.48 0.00
 2 2 11 9.16 0.00
 2 2 12 9.39 0.00
 2 2 13 -9.80 0.00
 2 2 14 0.01 0.00
 2 2 15 7.42 0.00
 2 2 16 9.56 0.00
 2 2 17 -2.43 0.00
 2 2 18 -6.07 0.00
 2 2 19 3.28 0.00
 2 2 20 -0.85 0.00
 2 4 0 104.38 0.00
 2 4 1 54.71 0.00
 2 4 2 80.87 0.00
 2 4 3 -13.42 0.00
 2 4 4 112.66 0.00
 2 4 5 0.34 0.00
 2 4 6 77.39 0.00
 2 4 7 27.91 0.00
 2 4 8 10.32 0.00
 2 4 9 32.08 0.00
 2 4 10 -13.00 0.00
 2 4 11 -10.27 0.00
 2 4 12 3.63 0.00
 2 4 13 8.95 0.00
 2 4 14 -11.27 0.00
 2 4 15 3.97 0.00
 2 4 16 -6.08 0.00
 2 4 17 -10.20 0.00
 2 4 18 3.90 0.00
 2 4 19 6.77 0.00
 2 4 20 -1.48 0.00
 2 6 0 35.94 0.00
 2 6 1 15.58 0.00
 2 6 2 306.55 0.00
 2 6 3 -4.56 0.00
 2 6 4 67.49 0.00
 2 6 5 -8.01 0.00
 2 6 6 69.24 0.00
 2 6 7 34.15 0.00
 2 6 8 -9.61 0.00
 2 6 9 26.85 0.00
 2 6 10 -3.65 0.00
 2 6 11 -15.42 0.00
 2 6 12 -9.06 0.00
 2 6 13 -2.75 0.00
 2 6 14 8.57 0.00
 2 6 15 5.57 0.00
 2 6 16 -4.65 0.00
 2 6 17 -0.57 0.00
 2 6 18 4.83 0.00
 2 6 19 0.72 0.00
 2 6 20 1.24 0.00
 2 8 0 -18.37 0.00
 2 8 1 2.55 0.00
 2 8 2 31.17 0.00
 2 8 3 7.55 0.00
 2 8 4 -119.80 0.00
 2 8 5 43.18 0.00
 2 8 6 -31.85 0.00
 2 8 7 4.64 0.00
 2 8 8 15.23 0.00
 2 8 9 -3.21 0.00
 2 8 10 20.72 0.00
 2 8 11 -21.48 0.00
 2 8 12 18.90 0.00
 2 8 13 -2.67 0.00
 2 8 14 17.45 0.00
 2 8 15 -4.62 0.00
 2 8 16 -6.90 0.00
 2 8 17 -1.44 0.00
 2 8 18 6.95 0.00
 2 8 19 -3.60 0.00
 2 8 20 -1.25 0.00
 2 10 0 1.31 0.00
 2 10 1 32.32 0.00
 2 10 2 21.56 0.00
 2 10 3 44.34 0.00
 2 10 4 -128.17 0.00
 2 10 5 8.79 0.00
 2 10 6 -6.29 0.00
 2 10 7 -13.99 0.00
 2 10 8 -14.80 0.00
 2 10 9 -15.21 0.00
 2 10 10 15.58 0.00
 2 10 11 -12.96 0.00
 2 10 12 -12.02 0.00
 2 10 13 -1.18 0.00
 2 10 14 11.39 0.00
 2 10 15 -7.41 0.00
 2 10 16 -9.72 0.00
 2 10 17 3.55 0.00
 2 10 18 -1.08 0.00
 2 10 19 -5.29 0.00
 2 10 20 -0.60 0.00
 2 12 0 48.70 0.00
 2 12 1 17.21 0.00
 2 12 2 31.32 0.00
 2 12 3 42.31 0.00
 2 12 4 -25.25 0.00
 2 12 5 33.67 0.00
 2 12 6 -25.10 0.00
 2 12 7 -12.75 0.00
 2 12 8 8.04 0.00
 2 12 9 -5.89 0.00
 2 12 10 10.57 0.00
 2 12 11 14.24 0.00
 2 12 12 -14.11 0.00
 2 12 13 15.64 0.00
 2 12 14 -5.94 0.00
 2 12 15 -4.13 0.00
 2 12 16 -2.91 0.00
 2 12 17 5.77 0.00
 2 12 18 -2.24 0.00
 2 12 19 1.04 0.00
 2 12 20 0.27 0.00
 2 14 0 56.43 0.00
 2 14 1 -1.36 0.00
 2 14 2 5.83 0.00
 2 14 3 47.59 0.00
 2 14 4 -9.59 0.00
 2 14 5 -5.62 0.00
 2 14 6 -5.76 0.00
 2 14 7 -15.14 0.00
 2 14 8 25.72 0.00
 2 14 9 -11.65 0.00
 2 14 10 41.40 0.00
 2 14 11 -3.52 0.00
 2 14 12 -7.11 0.00
 2 14 13 6.98 0.00
 2 14 14 -4.48 0.00
 2 14 15 -0.15 0.00
 2 14 16 -5.73 0.00
 2 14 17 13.82 0.00
 2 14 18 -2.94 0.00
 2 14 19 7.58 0.00
 2 14 20 0.07 0.00
 2 16 0 -21.81 0.00
 2 16 1 8.90 0.00
 2 16 2 -43.19 0.00
 2 16 3 -7.31 0.00
 2 16 4 64.21 0.00
 2 16 5 0.75 0.00
 2 16 6 4.06 0.00
 2 16 7 -1.63 0.00
 2 16 8 8.86 0.00
 2 16 9 -14.04 0.00
 2 16 10 3.71 0.00
 2 16 11 5.75 0.00
 2 16 12 5.77 0.00
 2 16 13 2.53 0.00
 2 16 14 -3.54 0.00
 2 16 15 -4.25 0.00
 2 16 16 12.96 0.00
 2 16 17 1.16 0.00
 2 16 18 -1.66 0.00
 2 16 19 -1.12 0.00
 2 16 20 -2.27 0.00
 2 18 0 -23.67 0.00
 2 18 1 -42.14 0.00
 2 18 2 -48.44 0.00
 2 18 3 -7.34 0.00
 2 18 4 15.06 0.00
 2 18 5 -22.77 0.00
 2 18 6 -2.14 0.00
 2 18 7 17.44 0.00
 2 18 8 1.11 0.00
 2 18 9 14.24 0.00
 2 18 10 -4.42 0.00
 2 18 11 4.56 0.00
 2 18 12 -9.95 0.00
 2 18 13 -0.11 0.00
 2 18 14 5.89 0.00
 2 18 15 -4.08 0.00
 2 18 16 -3.95 0.00
 2 18 17 -3.49 0.00
 2 18 18 -1.38 0.00
 2 18 19 -4.22 0.00
 2 20 0 -13.81 0.00
 2 20 1 6.15 0.00
 2 20 2 -26.42 0.00
 2 20 3 -7.67 0.00
 2 20 4 37.74 0.00
 2 20 5 2.87 0.00
 2 20 6 -16.51 0.00
 2 20 7 3.82 0.00
 2 20 8 1.71 0.00
 2 20 9 11.39 0.00
 2 20 10 -18.60 0.00
 2 20 11 6.96 0.00
 2 20 12 -1.61 0.00
 2 20 13 -0.91 0.00
 2 20 14 -5.37 0.00
 2 20 15 1.03 0.00
 2 20 16 -2.05 0.00
 2 20 17 -4.78 0.00
 2 20 18 -0.74 0.00
 2 20 19 -4.30 0.00
 2 22 0 4.76 0.00
 2 22 1 -12.81 0.00
 2 22 2 7.14 0.00
 2 22 3 3.40 0.00
 2 22 4 18.56 0.00
 2 22 5 -4.83 0.00
 2 22 6 -2.33 0.00
 2 22 7 14.01 0.00
 2 22 8 -19.54 0.00
 2 22 9 4.34 0.00
 2 22 10 -28.71 0.00
 2 22 11 -7.04 0.00
 2 22 12 -29.24 0.00
 2 22 13 0.08 0.00
 2 22 14 -4.03 0.00
 2 22 15 3.32 0.00
 2 22 16 -5.85 0.00
 2 22 17 3.53 0.00
 2 22 18 9.09 0.00
 2 24 0 0.62 0.00
 2 24 1 -0.81 0.00
 2 24 2 3.95 0.00
 2 24 3 -1.27 0.00
 2 24 4 17.75 0.00
 2 24 5 -5.43 0.00
 2 24 6 -1.23 0.00
 2 24 7 -5.21 0.00
 2 24 8 -4.08 0.00
 2 24 9 -3.46 0.00
 2 24 10 -12.94 0.00
 2 24 11 -4.72 0.00
 2 24 12 -9.46 0.00
 2 24 13 -3.62 0.00
 2 24 14 -1.94 0.00
 2 24 15 -1.44 0.00
 2 24 16 -8.71 0.00
 2 24 17 -1.17 0.00
 2 24 18 10.57 0.00
 2 26 0 18.69 0.00
 2 26 1 5.78 0.00
 2 26 2 16.88 0.00
 2 26 3 12.82 0.00
 2 26 4 -2.36 0.00
 2 26 5 -3.61 0.00
 2 26 6 -0.01 0.00
 2 26 7 7.33 0.00
 2 26 8 -0.32 0.00
 2 26 9 -6.45 0.00
 2 26 10 7.28 0.00
 2 26 11 2.20 0.00
 2 26 12 -9.87 0.00
 2 26 13 11.00 0.00
 2 26 14 5.01 0.00
 2 26 15 -1.78 0.00
 2 26 16 -8.23 0.00
 2 26 17 5.01 0.00
 2 28 0 1.88 0.00
 2 28 1 -1.27 0.00
 2 28 2 -7.00 0.00
 2 28 3 12.13 0.00
 2 28 4 -19.52 0.00
 2 28 5 6.55 0.00
 2 28 6 -13.06 0.00
 2 28 7 5.62 0.00
 2 28 8 9.76 0.00
 2 28 9 0.18 0.00
 2 28 10 12.80 0.00
 2 28 11 -4.81 0.00
 2 28 12 1.58 0.00
 2 28 13 -0.44 0.00
 2 28 14 3.79 0.00
 2 28 15 -2.50 0.00
 2 28 16 0.60 0.00
 2 30 0 5.10 0.00
 2 30 1 -19.88 0.00
 2 30 2 -1.82 0.00
 2 30 3 -10.69 0.00
 2 30 4 -6.69 0.00
 2 30 5 -11.32 0.00
 2 30 6 -8.71 0.00
 2 30 7 0.52 0.00
 2 30 8 0.28 0.00
 2 30 9 -4.13 0.00
 2 30 10 0.67 0.00
 2 30 11 -0.65 0.00
 2 30 12 3.39 0.00
 2 30 13 1.29 0.00
 2 30 14 3.60 0.00
 2 30 15 -6.39 0.00
 2 30 16 -2.21 0.00
 2 32 0 7.75 0.00
 2 32 1 -0.62 0.00
 2 32 2 -5.24 0.00
 2 32 3 -8.56 0.00
 2 32 4 -4.79 0.00
 2 32 5 -2.84 0.00
 2 32 6 7.77 0.00
 2 32 7 -3.38 0.00
 2 32 8 8.69 0.00
 2 32 9 -2.38 0.00
 2 32 10 -3.67 0.00
 2 32 11 -2.75 0.00
 2 32 12 6.27 0.00
 2 32 13 3.38 0.00
 2 32 14 -1.35 0.00
 2 32 15 0.98 0.00
 2 34 0 -3.39 0.00
 2 34 1 -0.36 0.00
 2 34 2 -10.29 0.00
 2 34 3 -8.84 0.00
 2 34 4 6.36 0.00
 2 34 5 3.40 0.00
 2 34 6 4.83 0.00
 2 34 7 4.67 0.00
 2 34 8 4.43 0.00
 2 34 9 7.56 0.00
 2 34 10 -2.18 0.00
 2 34 11 7.22 0.00
 2 34 12 7.47 0.00
 2 34 13 -3.33 0.00
 2 34 14 -0.59 0.00
 2 34 15 6.46 0.00
 2 36 0 8.45 0.00
 2 36 1 2.73 0.00
 2 36 2 -0.09 0.00
 2 36 3 -8.24 0.00
 2 36 4 9.87 0.00
 2 36 5 4.75 0.00
 2 36 6 16.64 0.00
 2 36 7 3.25 0.00
 2 36 8 10.96 0.00
 2 36 9 0.05 0.00
 2 36 10 3.27 0.00
 2 36 11 2.22 0.00
 2 36 12 0.79 0.00
 2 36 13 -6.08 0.00
 2 36 14 2.99 0.00
 2 38 0 -6.69 0.00
 2 38 1 23.78 0.00
 2 38 2 -7.78 0.00
 2 38 3 -10.37 0.00
 2 38 4 6.85 0.00
 2 38 5 2.88 0.00
 2 38 6 -2.34 0.00
 2 38 7 2.16 0.00
 2 38 8 1.51 0.00
 2 38 9 -2.94 0.00
 2 38 10 -1.46 0.00
 2 38 11 2.08 0.00
 2 38 12 0.44 0.00
 2 38 13 -0.15 0.00
 2 40 0 -3.92 0.00
 2 40 1 7.87 0.00
 2 40 2 -5.59 0.00
 2 40 3 -5.81 0.00
 2 40 4 1.82 0.00
 2 40 5 0.36 0.00
 2 40 6 -3.76 0.00
 2 40 7 0.41 0.00
 2 40 8 2.22 0.00
 2 40 9 0.83 0.00
 2 40 10 2.70 0.00
 2 40 11 4.65 0.00
 2 40 12 -4.60 0.00
 2 42 0 -5.63 0.00
 2 42 1 -3.30 0.00
 2 42 2 0.41 0.00
 2 42 3 -7.63 0.00
 2 42 4 2.55 0.00
 2 42 5 -0.33 0.00
 2 42 6 -5.13 0.00
 2 42 7 3.61 0.00
 2 42 8 0.77 0.00
 2 42 9 1.19 0.00
 2 42 10 3.88 0.00
 2 42 11 -0.68 0.00
 2 44 0 -5.62 0.00
 2 44 1 -0.16 0.00
 2 44 2 1.67 0.00
 2 44 3 0.64 0.00
 2 44 4 -6.53 0.00
 2 44 5 0.79 0.00
 2 44 6 -0.78 0.00
 2 44 7 -1.47 0.00
 2 44 8 -4.03 0.00
 2 44 9 -1.48 0.00
 2 46 0 -0.83 0.00
 2 46 1 -0.69 0.00
 2 46 2 9.71 0.00
 2 46 3 6.10 0.00
 2 46 4 -4.31 0.00
 2 46 5 -0.91 0.00
 2 46 6 4.88 0.00
 2 46 7 -3.05 0.00
 2 46 8 -1.16 0.00
 2 48 0 3.71 0.00
 2 48 1 -3.28 0.00
 2 48 2 5.26 0.00
 2 48 3 5.31 0.00
 2 48 4 -0.32 0.00
 2 48 5 -0.36 0.00
 3 1 1 -31.44 0.00
 3 1 2 67.98 0.00
 3 1 3 0.54 0.00
 3 1 4 22.95 0.00
 3 1 5 21.79 0.00
 3 1 6 40.31 0.00
 3 1 7 3.30 0.00
 3 1 8 -20.66 0.00
 3 1 9 -8.30 0.00
 3 1 10 22.82 0.00
 3 1 11 -11.44 0.00
 3 1 12 5.58 0.00
 3 1 13 4.89 0.00
 3 1 14 15.54 0.00
 3 1 15 4.46 0.00
 3 1 16 -4.00 0.00
 3 1 17 -0.25 0.00
 3 1 18 3.03 0.00
 3 1 19 1.80 0.00
 3 1 20 4.23 0.00
 3 3 0 53.97 0.00
 3 3 1 -95.27 0.00
 3 3 2 60.35 0.00
 3 3 3 56.81 0.00
 3 3 4 -31.44 0.00
 3 3 5 63.98 0.00
 3 3 6 -4.51 0.00
 3 3 7 4.64 0.00
 3 3 8 -30.29 0.00
 3 3 9 -15.41 0.00
 3 3 10 -9.17 0.00
 3 3 11 -7.37 0.00
 3 3 12 -14.27 0.00
 3 3 13 -7.88 0.00
 3 3 14 3.14 0.00
 3 3 15 -1.60 0.00
 3 3 16 -8.54 0.00
 3 3 17 -1.20 0.00
 3 3 18 4.87 0.00
 3 3 19 -3.33 0.00
 3 3 20 12.13 0.00
 3 5 0 11.20 0.00
 3 5 1 -92.20 0.00
 3 5 2 -94.74 0.00
 3 5 3 107.71 0.00
 3 5 4 -36.59 0.00
 3 5 5 -1.97 0.00
 3 5 6 6.11 0.00
 3 5 7 19.04 0.00
 3 5 8 21.19 0.00
 3 5 9 -7.30 0.00
 3 5 10 4.54 0.00
 3 5 11 -10.06 0.00
 3 5 12 -9.66 0.00
 3 5 13 4.62 0.00
 3 5 14 7.40 0.00
 3 5 15 -3.53 0.00
 3 5 16 -3.38 0.00
 3 5 17 0.18 0.00
 3 5 18 -2.83 0.00
 3 5 19 -1.47 0.00
 3 5 20 -1.62 0.00
 3 7 0 47.95 0.00
 3 7 1 5.11 0.00
 3 7 2 57.48 0.00
 3 7 3 14.11 0.00
 3 7 4 -7.06 0.00
 3 7 5 -44.65 0.00
 3 7 6 19.82 0.00
 3 7 7 12.20 0.00
 3 7 8 38.74 0.00
 3 7 9 0.69 0.00
 3 7 10 3.05 0.00
 3 7 11 -2.83 0.00
 3 7 12 -2.52 0.00
 3 7 13 -1.88 0.00
 3 7 14 1.65 0.00
 3 7 15 -3.81 0.00
 3 7 16 0.84 0.00
 3 7 17 -0.32 0.00
 3 7 18 -0.86 0.00
 3 7 19 1.88 0.00
 3 7 20 -5.07 0.00
 3 9 0 56.36 0.00
 3 9 1 -47.81 0.00
 3 9 2 -5.00 0.00
 3 9 3 10.66 0.00
 3 9 4 54.80 0.00
 3 9 5 -55.78 0.00
 3 9 6 7.52 0.00
 3 9 7 8.86 0.00
 3 9 8 16.07 0.00
 3 9 9 5.48 0.00
 3 9 10 7.89 0.00
 3 9 11 -0.61 0.00
 3 9 12 10.65 0.00
 3 9 13 1.49 0.00
 3 9 14 -3.42 0.00
 3 9 15 3.70 0.00
 3 9 16 3.38 0.00
 3 9 17 2.13 0.00
 3 9 18 -3.84 0.00
 3 9 19 3.07 0.00
 3 9 20 -11.43 0.00
 3 11 0 14.76 0.00
 3 11 1 -31.94 0.00
 3 11 2 26.65 0.00
 3 11 3 -61.14 0.00
 3 11 4 10.17 0.00
 3 11 5 -39.39 0.00
 3 11 6 -27.92 0.00
 3 11 7 4.34 0.00
 3 11 8 -4.64 0.00
 3 11 9 21.58 0.00
 3 11 10 -12.75 0.00
 3 11 11 8.77 0.00
 3 11 12 5.28 0.00
 3 11 13 8.89 0.00
 3 11 14 -10.38 0.00
 3 11 15 7.39 0.00
 3 11 16 -1.81 0.00
 3 11 17 -4.29 0.00
 3 11 18 -0.44 0.00
 3 11 19 -0.74 0.00
 3 11 20 -3.31 0.00
 3 13 0 -59.62 0.00
 3 13 1 3.04 0.00
 3 13 2 -4.26 0.00
 3 13 3 8.09 0.00
 3 13 4 22.04 0.00
 3 13 5 -17.05 0.00
 3 13 6 -20.79 0.00
 3 13 7 -2.03 0.00
 3 13 8 -9.16 0.00
 3 13 9 26.57 0.00
 3 13 10 -7.22 0.00
 3 13 11 5.06 0.00
 3 13 12 7.19 0.00
 3 13 13 -24.45 0.00
 3 13 14 -8.00 0.00
 3 13 15 -8.03 0.00
 3 13 16 0.96 0.00
 3 13 17 -13.51 0.00
 3 13 18 -0.46 0.00
 3 13 19 0.91 0.00
 3 13 20 -9.34 0.00
 3 15 0 -3.84 0.00
 3 15 1 -7.51 0.00
 3 15 2 18.61 0.00
 3 15 3 -17.90 0.00
 3 15 4 23.20 0.00
 3 15 5 13.91 0.00
 3 15 6 30.30 0.00
 3 15 7 -15.23 0.00
 3 15 8 8.76 0.00
 3 15 9 7.81 0.00
 3 15 10 2.54 0.00
 3 15 11 11.73 0.00
 3 15 12 9.45 0.00
 3 15 13 -3.96 0.00
 3 15 14 1.26 0.00
 3 15 15 6.52 0.00
 3 15 16 0.62 0.00
 3 15 17 3.16 0.00
 3 15 18 4.30 0.00
 3 15 19 3.95 0.00
 3 15 20 0.94 0.00
 3 17 0 -57.36 0.00
 3 17 1 10.69 0.00
 3 17 2 17.06 0.00
 3 17 3 17.67 0.00
 3 17 4 4.04 0.00
 3 17 5 12.24 0.00
 3 17 6 12.05 0.00
 3 17 7 -11.50 0.00
 3 17 8 -6.63 0.00
 3 17 9 -16.41 0.00
 3 17 10 4.94 0.00
 3 17 11 -0.71 0.00
 3 17 12 7.40 0.00
 3 17 13 1.29 0.00
 3 17 14 7.26 0.00
 3 17 15 4.56 0.00
 3 17 16 2.47 0.00
 3 17 17 -4.03 0.00
 3 17 18 3.80 0.00
 3 17 19 5.81 0.00
 3 19 0 -21.98 0.00
 3 19 1 -4.95 0.00
 3 19 2 3.18 0.00
 3 19 3 -16.20 0.00
 3 19 4 -12.55 0.00
 3 19 5 -1.24 0.00
 3 19 6 1.96 0.00
 3 19 7 -22.83 0.00
 3 19 8 -16.74 0.00
 3 19 9 -2.09 0.00
 3 19 10 -3.30 0.00
 3 19 11 -1.07 0.00
 3 19 12 -12.46 0.00
 3 19 13 0.36 0.00
 3 19 14 -0.84 0.00
 3 19 15 -4.22 0.00
 3 19 16 -3.07 0.00
 3 19 17 -1.77 0.00
 3 19 18 2.70 0.00
 3 19 19 2.44 0.00
 3 21 0 -55.21 0.00
 3 21 1 1.17 0.00
 3 21 2 -13.92 0.00
 3 21 3 -2.43 0.00
 3 21 4 2.90 0.00
 3 21 5 -6.15 0.00
 3 21 6 9.00 0.00
 3 21 7 -2.85 0.00
 3 21 8 0.12 0.00
 3 21 9 -15.00 0.00
 3 21 10 7.95 0.00
 3 21 11 -11.13 0.00
 3 21 12 -6.04 0.00
 3 21 13 -11.20 0.00
 3 21 14 -2.80 0.00
 3 21 15 -3.31 0.00
 3 21 16 -5.17 0.00
 3 21 17 2.98 0.00
 3 21 18 -3.83 0.00
 3 21 19 -2.36 0.00
 3 23 0 -10.16 0.00
 3 23 1 4.01 0.00
 3 23 2 -3.03 0.00
 3 23 3 15.91 0.00
 3 23 4 -1.35 0.00
 3 23 5 22.00 0.00
 3 23 6 1.96 0.00
 3 23 7 6.14 0.00
 3 23 8 11.64 0.00
 3 23 9 6.49 0.00
 3 23 10 8.74 0.00
 3 23 11 -2.55 0.00
 3 23 12 5.31 0.00
 3 23 13 3.89 0.00
 3 23 14 0.37 0.00
 3 23 15 3.41 0.00
 3 23 16 0.58 0.00
 3 23 17 3.04 0.00
 3 23 18 -1.89 0.00
 3 25 0 -16.78 0.00
 3 25 1 4.66 0.00
 3 25 2 -11.61 0.00
 3 25 3 -1.56 0.00
 3 25 4 6.70 0.00
 3 25 5 13.43 0.00
 3 25 6 -8.62 0.00
 3 25 7 13.08 0.00
 3 25 8 3.47 0.00
 3 25 9 3.45 0.00
 3 25 10 -3.60 0.00
 3 25 11 -7.67 0.00
 3 25 12 8.73 0.00
 3 25 13 -9.59 0.00
 3 25 14 -0.79 0.00
 3 25 15 3.40 0.00
 3 25 16 7.19 0.00
 3 25 17 -2.95 0.00
 3 27 0 -7.21 0.00
 3 27 1 2.40 0.00
 3 27 2 -7.61 0.00
 3 27 3 1.77 0.00
 3 27 4 4.07 0.00
 3 27 5 2.28 0.00
 3 27 6 -6.93 0.00
 3 27 7 -3.02 0.00
 3 27 8 5.40 0.00
 3 27 9 5.66 0.00
 3 27 10 -2.99 0.00
 3 27 11 -7.12 0.00
 3 27 12 7.12 0.00
 3 27 13 -3.65 0.00
 3 27 14 -4.24 0.00
 3 27 15 4.03 0.00
 3 27 16 1.67 0.00
 3 27 17 -0.04 0.00
 3 29 0 1.83 0.00
 3 29 1 5.23 0.00
 3 29 2 6.20 0.00
 3 29 3 -1.05 0.00
 3 29 4 6.90 0.00
 3 29 5 -10.43 0.00
 3 29 6 -6.18 0.00
 3 29 7 3.19 0.00
 3 29 8 5.31 0.00
 3 29 9 16.51 0.00
 3 29 10 -9.05 0.00
 3 29 11 -2.48 0.00
 3 29 12 0.34 0.00
 3 29 13 3.49 0.00
 3 29 14 -5.94 0.00
 3 29 15 2.92 0.00
 3 29 16 -6.05 0.00
 3 31 0 17.31 0.00
 3 31 1 -5.12 0.00
 3 31 2 9.73 0.00
 3 31 3 -2.96 0.00
 3 31 4 -8.26 0.00
 3 31 5 -1.81 0.00
 3 31 6 -9.98 0.00
 3 31 7 -8.52 0.00
 3 31 8 -5.50 0.00
 3 31 9 2.22 0.00
 3 31 10 0.07 0.00
 3 31 11 -1.38 0.00
 3 31 12 3.17 0.00
 3 31 13 0.96 0.00
 3 31 14 2.64 0.00
 3 31 15 1.22 0.00
 3 31 16 3.46 0.00
 3 33 0 10.22 0.00
 3 33 1 -4.61 0.00
 3 33 2 2.61 0.00
 3 33 3 -0.07 0.00
 3 33 4 -7.93 0.00
 3 33 5 -1.89 0.00
 3 33 6 1.21 0.00
 3 33 7 0.39 0.00
 3 33 8 -1.64 0.00
 3 33 9 1.42 0.00
 3 33 10 -1.88 0.00
 3 33 11 -2.65 0.00
 3 33 12 -6.14 0.00
 3 33 13 -3.12 0.00
 3 33 14 0.93 0.00
 3 33 15 -5.51 0.00
 3 35 0 -14.92 0.00
 3 35 1 2.66 0.00
 3 35 2 -6.80 0.00
 3 35 3 0.74 0.00
 3 35 4 -5.55 0.00
 3 35 5 -3.15 0.00
 3 35 6 5.05 0.00
 3 35 7 -0.43 0.00
 3 35 8 -2.17 0.00
 3 35 9 2.24 0.00
 3 35 10 5.87 0.00
 3 35 11 -2.79 0.00
 3 35 12 -2.19 0.00
 3 35 13 -3.66 0.00
 3 35 14 0.29 0.00
 3 37 0 -1.86 0.00
 3 37 1 8.59 0.00
 3 37 2 -12.39 0.00
 3 37 3 3.19 0.00
 3 37 4 -5.20 0.00
 3 37 5 6.21 0.00
 3 37 6 4.96 0.00
 3 37 7 -0.92 0.00
 3 37 8 -2.53 0.00
 3 37 9 3.21 0.00
 3 37 10 6.58 0.00
 3 37 11 3.26 0.00
 3 37 12 0.10 0.00
 3 37 13 -2.23 0.00
 3 37 14 6.04 0.00
 3 39 0 13.43 0.00
 3 39 1 2.01 0.00
 3 39 2 0.44 0.00
 3 39 3 -2.25 0.00
 3 39 4 4.03 0.00
 3 39 5 1.62 0.00
 3 39 6 8.27 0.00
 3 39 7 8.81 0.00
 3 39 8 -1.07 0.00
 3 39 9 8.88 0.00
 3 39 10 -3.58 0.00
 3 39 11 0.96 0.00
 3 39 12 4.87 0.00
 3 39 13 2.56 0.00
 3 41 0 15.24 0.00
 3 41 1 -4.43 0.00
 3 41 2 7.91 0.00
 3 41 3 1.04 0.00
 3 41 4 7.71 0.00
 3 41 5 0.54 0.00
 3 41 6 1.72 0.00
 3 41 7 -6.59 0.00
 3 41 8 4.01 0.00
 3 41 9 3.00 0.00
 3 41 10 -2.62 0.00
 3 41 11 -2.87 0.00
 3 43 0 0.22 0.00
 3 43 1 1.03 0.00
 3 43 2 -9.16 0.00
 3 43 3 -3.49 0.00
 3 43 4 -1.48 0.00
 3 43 5 2.83 0.00
 3 43 6 3.35 0.00
 3 43 7 -2.05 0.00
 3 43 8 1.12 0.00
 3 43 9 4.64 0.00
 3 43 10 -0.80 0.00
 3 45 0 -4.85 0.00
 3 45 1 -0.71 0.00
 3 45 2 -3.22 0.00
 3 45 3 3.23 0.00
 3 45 4 -3.74 0.00
 3 45 5 1.92 0.00
 3 45 6 -8.25 0.00
 3 45 7 3.96 0.00
 3 45 8 3.95 0.00
 3 47 0 -5.83 0.00
 3 47 1 -7.07 0.00
 3 47 2 1.60 0.00
 3 47 3 -8.21 0.00
 3 47 4 7.60 0.00
 3 47 5 -1.25 0.00
 3 47 6 4.90 0.00
 3 49 1 3.75 0.00
 3 49 2 4.29 0.00
 3 49 3 -3.97 0.00
 4 0 1 27.34 0.00
 4 0 2 -37.05 0.00
 4 0 3 -5.48 0.00
 4 0 4 2.88 0.00
 4 0 5 30.37 0.00
 4 0 6 -60.16 0.00
 4 0 7 12.49 0.00
 4 0 8 6.90 0.00
 4 0 9 -44.14 0.00
 4 0 10 -25.10 0.00
 4 0 11 12.62 0.00
 4 0 12 2.10 0.00
 4 0 13 10.92 0.00
 4 0 14 -3.29 0.00
 4 0 15 0.82 0.00
 4 0 16 -1.24 0.00
 4 0 17 -4.06 0.00
 4 0 18 -13.43 0.00
 4 0 19 1.73 0.00
 4 0 20 1.94 0.00
 4 2 0 26.04 0.00
 4 2 1 45.94 0.00
 4 2 2 29.93 0.00
 4 2 3 14.04 0.00
 4 2 4 45.34 0.00
 4 2 5 25.65 0.00
 4 2 6 -29.11 0.00
 4 2 7 -19.57 0.00
 4 2 8 34.47 0.00
 4 2 9 -20.83 0.00
 4 2 10 8.98 0.00
 4 2 11 9.85 0.00
 4 2 12 8.24 0.00
 4 2 13 4.88 0.00
 4 2 14 9.52 0.00
 4 2 15 -1.39 0.00
 4 2 16 2.06 0.00
 4 2 17 -5.41 0.00
 4 2 18 -4.72 0.00
 4 2 19 -1.36 0.00
 4 2 20 -1.42 0.00
 4 4 0 35.91 0.00
 4 4 1 26.22 0.00
 4 4 2 -56.00 0.00
 4 4 3 -16.63 0.00
 4 4 4 48.71 0.00
 4 4 5 -4.07 0.00
 4 4 6 -32.99 0.00
 4 4 7 13.43 0.00
 4 4 8 -1.28 0.00
 4 4 9 -17.25 0.00
 4 4 10 3.51 0.00
 4 4 11 2.05 0.00
 4 4 12 13.71 0.00
 4 4 13 2.10 0.00
 4 4 14 8.74 0.00
 4 4 15 -3.14 0.00
 4 4 16 5.60 0.00
 4 4 17 -5.81 0.00
 4 4 18 6.83 0.00
 4 4 19 0.93 0.00
 4 4 20 1.56 0.00
 4 6 0 -138.40 0.00
 4 6 1 31.13 0.00
 4 6 2 -12.23 0.00
 4 6 3 -45.85 0.00
 4 6 4 -15.50 0.00
 4 6 5 -34.24 0.00
 4 6 6 -18.73 0.00
 4 6 7 9.20 0.00
 4 6 8 -17.94 0.00
 4 6 9 2.02 0.00
 4 6 10 -11.50 0.00
 4 6 11 -1.99 0.00
 4 6 12 -24.85 0.00
 4 6 13 5.95 0.00
 4 6 14 0.64 0.00
 4 6 15 5.90 0.00
 4 6 16 -6.86 0.00
 4 6 17 5.91 0.00
 4 6 18 4.47 0.00
 4 6 19 -4.24 0.00
 4 6 20 0.20 0.00
 4 8 0 -150.19 0.00
 4 8 1 53.19 0.00
 4 8 2 -24.39 0.00
 4 8 3 26.04 0.00
 4 8 4 -3.09 0.00
 4 8 5 12.26 0.00
 4 8 6 -9.94 0.00
 4 8 7 12.24 0.00
 4 8 8 -3.84 0.00
 4 8 9 8.26 0.00
 4 8 10 2.38 0.00
 4 8 11 7.64 0.00
 4 8 12 -15.24 0.00
 4 8 13 -8.17 0.00
 4 8 14 -6.45 0.00
 4 8 15 -0.04 0.00
 4 8 16 -12.21 0.00
 4 8 17 4.65 0.00
 4 8 18 4.93 0.00
 4 8 19 -5.57 0.00
 4 8 20 0.30 0.00
 4 10 0 -74.58 0.00
 4 10 1 33.23 0.00
 4 10 2 4.62 0.00
 4 10 3 6.99 0.00
 4 10 4 20.69 0.00
 4 10 5 -17.56 0.00
 4 10 6 44.15 0.00
 4 10 7 -12.52 0.00
 4 10 8 -9.84 0.00
 4 10 9 5.61 0.00
 4 10 10 4.76 0.00
 4 10 11 2.54 0.00
 4 10 12 -15.54 0.00
 4 10 13 -3.55 0.00
 4 10 14 12.28 0.00
 4 10 15 -5.45 0.00
 4 10 16 -3.80 0.00
 4 10 17 4.46 0.00
 4 10 18 2.34 0.00
 4 10 19 -2.92 0.00
 4 10 20 5.55 0.00
 4 12 0 -26.91 0.00
 4 12 1 -8.71 0.00
 4 12 2 43.99 0.00
 4 12 3 -2.20 0.00
 4 12 4 38.68 0.00
 4 12 5 -8.01 0.00
 4 12 6 25.33 0.00
 4 12 7 -0.17 0.00
 4 12 8 2.91 0.00
 4 12 9 15.27 0.00
 4 12 10 17.98 0.00
 4 12 11 18.01 0.00
 4 12 12 5.68 0.00
 4 12 13 -0.99 0.00
 4 12 14 10.83 0.00
 4 12 15 -1.56 0.00
 4 12 16 9.19 0.00
 4 12 17 3.72 0.00
 4 12 18 1.90 0.00
 4 12 19 -5.89 0.00
 4 12 20 6.08 0.00
 4 14 0 -22.50 0.00
 4 14 1 -30.06 0.00
 4 14 2 -14.93 0.00
 4 14 3 21.90 0.00
 4 14 4 -12.47 0.00
 4 14 5 12.57 0.00
 4 14 6 -2.18 0.00
 4 14 7 2.92 0.00
 4 14 8 -13.11 0.00
 4 14 9 1.57 0.00
 4 14 10 7.92 0.00
 4 14 11 -5.62 0.00
 4 14 12 7.22 0.00
 4 14 13 1.02 0.00
 4 14 14 4.44 0.00
 4 14 15 -5.29 0.00
 4 14 16 1.17 0.00
 4 14 17 -2.82 0.00
 4 14 18 -5.03 0.00
 4 14 19 -4.47 0.00
 4 14 20 6.84 0.00
 4 16 0 -20.88 0.00
 4 16 1 9.37 0.00
 4 16 2 -31.70 0.00
 4 16 3 -4.49 0.00
 4 16 4 -13.65 0.00
 4 16 5 11.54 0.00
 4 16 6 -13.20 0.00
 4 16 7 4.58 0.00
 4 16 8 -35.93 0.00
 4 16 9 -15.19 0.00
 4 16 10 -18.62 0.00
 4 16 11 -1.23 0.00
 4 16 12 7.85 0.00
 4 16 13 -3.17 0.00
 4 16 14 -14.37 0.00
 4 16 15 0.89 0.00
 4 16 16 3.75 0.00
 4 16 17 -2.54 0.00
 4 16 18 -10.31 0.00
 4 16 19 -3.32 0.00
 4 18 0 17.51 0.00
 4 18 1 -49.99 0.00
 4 18 2 -2.35 0.00
 4 18 3 6.85 0.00
 4 18 4 -16.51 0.00
 4 18 5 20.12 0.00
 4 18 6 0.43 0.00
 4 18 7 9.63 0.00
 4 18 8 -3.37 0.00
 4 18 9 0.23 0.00
 4 18 10 -7.25 0.00
 4 18 11 -1.82 0.00
 4 18 12 5.57 0.00
 4 18 13 3.20 0.00
 4 18 14 -3.38 0.00
 4 18 15 2.09 0.00
 4 18 16 -3.72 0.00
 4 18 17 -3.63 0.00
 4 18 18 -6.81 0.00
 4 18 19 4.79 0.00
 4 20 0 44.03 0.00
 4 20 1 -2.51 0.00
 4 20 2 17.84 0.00
 4 20 3 -8.78 0.00
 4 20 4 -4.75 0.00
 4 20 5 8.57 0.00
 4 20 6 1.84 0.00
 4 20 7 -6.86 0.00
 4 20 8 9.32 0.00
 4 20 9 3.67 0.00
 4 20 10 5.38 0.00
 4 20 11 12.71 0.00
 4 20 12 17.57 0.00
 4 20 13 6.75 0.00
 4 20 14 -6.63 0.00
 4 20 15 4.92 0.00
 4 20 16 6.41 0.00
 4 20 17 -4.20 0.00
 4 20 18 -0.66 0.00
 4 20 19 5.55 0.00
 4 22 0 5.83 0.00
 4 22 1 -13.49 0.00
 4 22 2 2.86 0.00
 4 22 3 2.01 0.00
 4 22 4 -14.25 0.00
 4 22 5 2.82 0.00
 4 22 6 4.23 0.00
 4 22 7 -14.10 0.00
 4 22 8 2.81 0.00
 4 22 9 -8.75 0.00
 4 22 10 8.85 0.00
 4 22 11 -10.09 0.00
 4 22 12 -0.84 0.00
 4 22 13 -2.42 0.00
 4 22 14 -1.53 0.00
 4 22 15 -2.77 0.00
 4 22 16 7.27 0.00
 4 22 17 1.14 0.00
 4 22 18 4.97 0.00
 4 24 0 -7.30 0.00
 4 24 1 -7.85 0.00
 4 24 2 -2.18 0.00
 4 24 3 -6.00 0.00
 4 24 4 -11.92 0.00
 4 24 5 5.02 0.00
 4 24 6 8.39 0.00
 4 24 7 -2.59 0.00
 4 24 8 -8.83 0.00
 4 24 9 7.96 0.00
 4 24 10 0.55 0.00
 4 24 11 6.21 0.00
 4 24 12 -1.16 0.00
 4 24 13 -4.64 0.00
 4 24 14 -1.23 0.00
 4 24 15 -7.71 0.00
 4 24 16 0.06 0.00
 4 24 17 -3.93 0.00
 4 24 18 -1.39 0.00
 4 26 0 -11.04 0.00
 4 26 1 -21.36 0.00
 4 26 2 -2.81 0.00
 4 26 3 1.99 0.00
 4 26 4 -9.82 0.00
 4 26 5 7.08 0.00
 4 26 6 9.89 0.00
 4 26 7 0.87 0.00
 4 26 8 1.69 0.00
 4 26 9 11.15 0.00
 4 26 10 6.79 0.00
 4 26 11 5.82 0.00
 4 26 12 -8.46 0.00
 4 26 13 6.23 0.00
 4 26 14 4.99 0.00
 4 26 15 -5.80 0.00
 4 26 16 -0.37 0.00
 4 26 17 0.84 0.00
 4 28 0 -13.41 0.00
 4 28 1 -18.22 0.00
 4 28 2 4.66 0.00
 4 28 3 -0.02 0.00
 4 28 4 -1.96 0.00
 4 28 5 0.93 0.00
 4 28 6 7.98 0.00
 4 28 7 -10.40 0.00
 4 28 8 3.07 0.00
 4 28 9 0.56 0.00
 4 28 10 5.98 0.00
 4 28 11 -3.47 0.00
 4 28 12 -7.15 0.00
 4 28 13 3.30 0.00
 4 28 14 3.61 0.00
 4 28 15 4.80 0.00
 4 28 16 11.66 0.00
 4 28 17 8.81 0.00
 4 30 0 -5.81 0.00
 4 30 1 2.86 0.00
 4 30 2 7.36 0.00
 4 30 3 7.39 0.00
 4 30 4 12.34 0.00
 4 30 5 -4.46 0.00
 4 30 6 0.84 0.00
 4 30 7 -2.29 0.00
 4 30 8 8.08 0.00
 4 30 9 2.94 0.00
 4 30 10 1.88 0.00
 4 30 11 -6.42 0.00
 4 30 12 -2.79 0.00
 4 30 13 2.39 0.00
 4 30 14 5.09 0.00
 4 30 15 -4.70 0.00
 4 30 16 15.84 0.00
 4 32 0 -6.91 0.00
 4 32 1 28.46 0.00
 4 32 2 6.62 0.00
 4 32 3 10.42 0.00
 4 32 4 8.84 0.00
 4 32 5 -2.95 0.00
 4 32 6 0.31 0.00
 4 32 7 -2.72 0.00
 4 32 8 8.75 0.00
 4 32 9 2.01 0.00
 4 32 10 5.30 0.00
 4 32 11 -2.72 0.00
 4 32 12 -9.90 0.00
 4 32 13 3.54 0.00
 4 32 14 -10.53 0.00
 4 32 15 -1.91 0.00
 4 34 0 -9.48 0.00
 4 34 1 8.31 0.00
 4 34 2 -8.90 0.00
 4 34 3 4.88 0.00
 4 34 4 4.04 0.00
 4 34 5 -2.05 0.00
 4 34 6 -15.89 0.00
 4 34 7 3.17 0.00
 4 34 8 2.51 0.00
 4 34 9 6.62 0.00
 4 34 10 -1.34 0.00
 4 34 11 3.67 0.00
 4 34 12 2.91 0.00
 4 34 13 1.07 0.00
 4 34 14 -4.92 0.00
 4 34 15 5.03 0.00
 4 36 0 10.34 0.00
 4 36 1 -20.79 0.00
 4 36 2 3.67 0.00
 4 36 3 -3.81 0.00
 4 36 4 1.68 0.00
 4 36 5 -1.25 0.00
 4 36 6 -6.00 0.00
 4 36 7 -1.12 0.00
 4 36 8 7.53 0.00
 4 36 9 -1.63 0.00
 4 36 10 8.29 0.00
 4 36 11 -0.27 0.00
 4 36 12 0.93 0.00
 4 36 13 -4.87 0.00
 4 36 14 0.69 0.00
 4 38 0 11.15 0.00
 4 38 1 -0.94 0.00
 4 38 2 -9.42 0.00
 4 38 3 -1.70 0.00
 4 38 4 -5.13 0.00
 4 38 5 0.56 0.00
 4 38 6 -9.85 0.00
 4 38 7 -1.83 0.00
 4 38 8 3.31 0.00
 4 38 9 -7.23 0.00
 4 38 10 -13.55 0.00
 4 38 11 -3.74 0.00
 4 38 12 2.99 0.00
 4 38 13 -1.28 0.00
 4 40 0 3.28 0.00
 4 40 1 -7.96 0.00
 4 40 2 -7.23 0.00
 4 40 3 6.95 0.00
 4 40 4 0.47 0.00
 4 40 5 0.84 0.00
 4 40 6 0.41 0.00
 4 40 7 -1.10 0.00
 4 40 8 10.26 0.00
 4 40 9 -2.16 0.00
 4 40 10 6.08 0.00
 4 40 11 0.46 0.00
 4 40 12 8.09 0.00
 4 42 0 15.14 0.00
 4 42 1 -3.96 0.00
 4 42 2 3.10 0.00
 4 42 3 1.48 0.00
 4 42 4 10.40 0.00
 4 42 5 1.43 0.00
 4 42 6 1.37 0.00
 4 42 7 6.94 0.00
 4 42 8 6.59 0.00
 4 42 9 0.02 0.00
 4 42 10 -0.98 0.00
 4 44 0 2.93 0.00
 4 44 1 8.87 0.00
 4 44 2 1.02 0.00
 4 44 3 10.30 0.00
 4 44 4 -2.53 0.00
 4 44 5 2.99 0.00
 4 44 6 -4.26 0.00
 4 44 7 4.48 0.00
 4 44 8 -4.78 0.00
 4 44 9 -1.19 0.00
 4 46 0 -1.94 0.00
 4 46 1 0.32 0.00
 4 46 2 -4.98 0.00
 4 46 3 6.09 0.00
 4 46 4 -5.35 0.00
 4 46 5 1.17 0.00
 4 46 6 -4.89 0.00
 4 46 7 1.89 0.00
 4 48 0 3.12 0.00
 4 48 1 -10.95 0.00
 4 48 2 1.25 0.00
 4 48 3 1.87 0.00
 4 48 4 2.50 0.00
 5 1 0 -36.35 0.00
 5 1 1 27.99 0.00
 5 1 2 -13.41 0.00
 5 1 3 -79.27 0.00
 5 1 4 -3.78 0.00
 5 1 5 -19.57 0.00
 5 1 6 16.26 0.00
 5 1 7 -23.73 0.00
 5 1 8 -18.13 0.00
 5 1 9 26.28 0.00
 5 1 10 5.71 0.00
 5 1 11 7.25 0.00
 5 1 12 9.75 0.00
 5 1 13 2.56 0.00
 5 1 14 -2.15 0.00
 5 1 15 7.80 0.00
 5 1 16 -8.04 0.00
 5 1 17 -8.73 0.00
 5 1 18 -11.82 0.00
 5 1 19 1.21 0.00
 5 1 20 -9.40 0.00
 5 3 0 -22.94 0.00
 5 3 1 -27.55 0.00
 5 3 2 29.07 0.00
 5 3 3 -14.84 0.00
 5 3 4 -19.44 0.00
 5 3 5 28.01 0.00
 5 3 6 -5.46 0.00
 5 3 7 -30.58 0.00
 5 3 8 -21.49 0.00
 5 3 9 9.63 0.00
 5 3 10 -7.43 0.00
 5 3 11 15.46 0.00
 5 3 12 10.73 0.00
 5 3 13 6.79 0.00
 5 3 14 -1.99 0.00
 5 3 15 13.92 0.00
 5 3 16 -2.56 0.00
 5 3 17 1.51 0.00
 5 3 18 0.19 0.00
 5 3 19 3.54 0.00
 5 3 20 0.52 0.00
 5 5 0 65.72 0.00
 5 5 1 53.42 0.00
 5 5 2 -9.01 0.00
 5 5 3 54.37 0.00
 5 5 4 -13.85 0.00
 5 5 5 -3.70 0.00
 5 5 6 0.98 0.00
 5 5 7 -11.05 0.00
 5 5 8 17.06 0.00
 5 5 9 1.02 0.00
 5 5 10 0.39 0.00
 5 5 11 0.73 0.00
 5 5 12 5.07 0.00
 5 5 13 5.97 0.00
 5 5 14 1.21 0.00
 5 5 15 2.90 0.00
 5 5 16 1.94 0.00
 5 5 17 2.30 0.00
 5 5 18 -4.31 0.00
 5 5 19 7.23 0.00
 5 5 20 -10.24 0.00
 5 7 0 23.38 0.00
 5 7 1 -47.12 0.00
 5 7 2 37.75 0.00
 5 7 3 -26.41 0.00
 5 7 4 -0.49 0.00
 5 7 5 -7.98 0.00
 5 7 6 5.84 0.00
 5 7 7 -3.82 0.00
 5 7 8 3.67 0.00
 5 7 9 -1.10 0.00
 5 7 10 -24.33 0.00
 5 7 11 -4.07 0.00
 5 7 12 -5.08 0.00
 5 7 13 -1.24 0.00
 5 7 14 -13.85 0.00
 5 7 15 -10.43 0.00
 5 7 16 -1.88 0.00
 5 7 17 -6.57 0.00
 5 7 18 -2.50 0.00
 5 7 19 3.90 0.00
 5 7 20 -5.55 0.00
 5 9 0 59.91 0.00
 5 9 1 10.39 0.00
 5 9 2 -10.79 0.00
 5 9 3 22.05 0.00
 5 9 4 20.51 0.00
 5 9 5 -4.34 0.00
 5 9 6 -17.22 0.00
 5 9 7 0.42 0.00
 5 9 8 1.79 0.00
 5 9 9 -9.85 0.00
 5 9 10 -10.00 0.00
 5 9 11 -10.09 0.00
 5 9 12 0.27 0.00
 5 9 13 -2.13 0.00
 5 9 14 -9.94 0.00
 5 9 15 1.24 0.00
 5 9 16 7.18 0.00
 5 9 17 0.65 0.00
 5 9 18 -1.47 0.00
 5 9 19 2.04 0.00
 5 9 20 -7.32 0.00
 5 11 0 33.92 0.00
 5 11 1 54.90 0.00
 5 11 2 -7.80 0.00
 5 11 3 40.06 0.00
 5 11 4 14.11 0.00
 5 11 5 32.50 0.00
 5 11 6 -21.87 0.00
 5 11 7 -5.75 0.00
 5 11 8 6.89 0.00
 5 11 9 -13.10 0.00
 5 11 10 -7.35 0.00
 5 11 11 -3.16 0.00
 5 11 12 9.01 0.00
 5 11 13 19.75 0.00
 5 11 14 -8.51 0.00
 5 11 15 15.87 0.00
 5 11 16 2.55 0.00
 5 11 17 7.27 0.00
 5 11 18 1.88 0.00
 5 11 19 2.55 0.00
 5 11 20 6.30 0.00
 5 13 0 5.97 0.00
 5 13 1 17.51 0.00
 5 13 2 -14.76 0.00
 5 13 3 4.76 0.00
 5 13 4 4.08 0.00
 5 13 5 0.39 0.00
 5 13 6 -25.33 0.00
 5 13 7 -4.28 0.00
 5 13 8 10.59 0.00
 5 13 9 -4.92 0.00
 5 13 10 1.27 0.00
 5 13 11 12.76 0.00
 5 13 12 10.13 0.00
 5 13 13 -5.21 0.00
 5 13 14 -3.07 0.00
 5 13 15 3.08 0.00
 5 13 16 4.21 0.00
 5 13 17 -2.76 0.00
 5 13 18 -2.20 0.00
 5 13 19 -2.46 0.00
 5 13 20 -5.94 0.00
 5 15 0 13.70 0.00
 5 15 1 -29.34 0.00
 5 15 2 -28.96 0.00
 5 15 3 -32.02 0.00
 5 15 4 9.83 0.00
 5 15 5 12.65 0.00
 5 15 6 7.13 0.00
 5 15 7 -14.00 0.00
 5 15 8 6.66 0.00
 5 15 9 -7.89 0.00
 5 15 10 -6.74 0.00
 5 15 11 16.95 0.00
 5 15 12 -3.65 0.00
 5 15 13 0.81 0.00
 5 15 14 -3.38 0.00
 5 15 15 0.54 0.00
 5 15 16 -3.05 0.00
 5 15 17 0.86 0.00
 5 15 18 0.18 0.00
 5 15 19 -9.14 0.00
 5 17 0 -15.65 0.00
 5 17 1 -3.64 0.00
 5 17 2 -8.47 0.00
 5 17 3 -12.88 0.00
 5 17 4 -9.47 0.00
 5 17 5 -3.65 0.00
 5 17 6 3.92 0.00
 5 17 7 -4.56 0.00
 5 17 8 2.82 0.00
 5 17 9 -37.77 0.00
 5 17 10 6.80 0.00
 5 17 11 -3.58 0.00
 5 17 12 4.20 0.00
 5 17 13 -1.57 0.00
 5 17 14 5.39 0.00
 5 17 15 1.31 0.00
 5 17 16 -2.92 0.00
 5 17 17 -2.07 0.00
 5 17 18 -0.20 0.00
 5 17 19 -7.88 0.00
 5 19 0 13.40 0.00
 5 19 1 -5.74 0.00
 5 19 2 0.89 0.00
 5 19 3 -16.19 0.00
 5 19 4 0.98 0.00
 5 19 5 6.64 0.00
 5 19 6 -4.13 0.00
 5 19 7 1.41 0.00
 5 19 8 -10.36 0.00
 5 19 9 6.57 0.00
 5 19 10 5.06 0.00
 5 19 11 1.56 0.00
 5 19 12 -2.86 0.00
 5 19 13 4.15 0.00
 5 19 14 10.97 0.00
 5 19 15 1.26 0.00
 5 19 16 -0.87 0.00
 5 19 17 2.91 0.00
 5 19 18 -0.51 0.00
 5 19 19 -7.21 0.00
 5 21 0 -18.64 0.00
 5 21 1 8.77 0.00
 5 21 2 -12.93 0.00
 5 21 3 8.03 0.00
 5 21 4 5.08 0.00
 5 21 5 5.01 0.00
 5 21 6 15.05 0.00
 5 21 7 16.48 0.00
 5 21 8 -1.36 0.00
 5 21 9 -13.89 0.00
 5 21 10 8.21 0.00
 5 21 11 -0.76 0.00
 5 21 12 4.25 0.00
 5 21 13 -6.66 0.00
 5 21 14 5.84 0.00
 5 21 15 -2.29 0.00
 5 21 16 -4.90 0.00
 5 21 17 5.63 0.00
 5 21 18 -1.61 0.00
 5 23 0 13.07 0.00
 5 23 1 0.28 0.00
 5 23 2 0.09 0.00
 5 23 3 -0.41 0.00
 5 23 4 -1.84 0.00
 5 23 5 -2.19 0.00
 5 23 6 -5.40 0.00
 5 23 7 -3.75 0.00
 5 23 8 4.14 0.00
 5 23 9 11.57 0.00
 5 23 10 2.52 0.00
 5 23 11 9.51 0.00
 5 23 12 1.37 0.00
 5 23 13 2.81 0.00
 5 23 14 -2.53 0.00
 5 23 15 -0.69 0.00
 5 23 16 -0.55 0.00
 5 23 17 3.62 0.00
 5 23 18 -1.24 0.00
 5 25 0 -4.53 0.00
 5 25 1 -5.97 0.00
 5 25 2 -7.32 0.00
 5 25 3 -8.24 0.00
 5 25 4 13.64 0.00
 5 25 5 -13.70 0.00
 5 25 6 -4.81 0.00
 5 25 7 -5.23 0.00
 5 25 8 -14.31 0.00
 5 25 9 -8.61 0.00
 5 25 10 -10.03 0.00
 5 25 11 8.41 0.00
 5 25 12 4.59 0.00
 5 25 13 -3.19 0.00
 5 25 14 -1.85 0.00
 5 25 15 5.68 0.00
 5 25 16 0.38 0.00
 5 25 17 2.75 0.00
 5 27 0 -15.53 0.00
 5 27 1 -3.74 0.00
 5 27 2 -5.66 0.00
 5 27 3 -1.01 0.00
 5 27 4 24.25 0.00
 5 27 5 -10.07 0.00
 5 27 6 5.56 0.00
 5 27 7 -8.03 0.00
 5 27 8 10.47 0.00
 5 27 9 -4.96 0.00
 5 27 10 -2.96 0.00
 5 27 11 1.16 0.00
 5 27 12 -0.29 0.00
 5 27 13 0.38 0.00
 5 27 14 -5.34 0.00
 5 27 15 9.23 0.00
 5 27 16 0.22 0.00
 5 27 17 12.18 0.00
 5 29 0 -24.92 0.00
 5 29 1 -0.93 0.00
 5 29 2 -5.49 0.00
 5 29 3 8.50 0.00
 5 29 4 11.98 0.00
 5 29 5 -2.04 0.00
 5 29 6 0.40 0.00
 5 29 7 22.34 0.00
 5 29 8 4.40 0.00
 5 29 9 18.54 0.00
 5 29 10 -6.71 0.00
 5 29 11 4.69 0.00
 5 29 12 -4.45 0.00
 5 29 13 -6.26 0.00
 5 29 14 -2.03 0.00
 5 29 15 0.34 0.00
 5 29 16 -9.45 0.00
 5 31 0 -14.18 0.00
 5 31 1 -9.88 0.00
 5 31 2 -4.28 0.00
 5 31 3 2.10 0.00
 5 31 4 -7.99 0.00
 5 31 5 3.88 0.00
 5 31 6 -8.22 0.00
 5 31 7 6.89 0.00
 5 31 8 2.71 0.00
 5 31 9 2.15 0.00
 5 31 10 2.31 0.00
 5 31 11 -0.39 0.00
 5 31 12 5.11 0.00
 5 31 13 -8.04 0.00
 5 31 14 7.33 0.00
 5 31 15 0.41 0.00
 5 31 16 3.29 0.00
 5 33 0 10.21 0.00
 5 33 1 -9.20 0.00
 5 33 2 17.17 0.00
 5 33 3 3.71 0.00
 5 33 4 0.30 0.00
 5 33 5 3.44 0.00
 5 33 6 5.67 0.00
 5 33 7 9.18 0.00
 5 33 8 5.60 0.00
 5 33 9 4.10 0.00
 5 33 10 1.65 0.00
 5 33 11 1.77 0.00
 5 33 12 -6.01 0.00
 5 33 13 -3.94 0.00
 5 33 14 4.15 0.00
 5 33 15 6.05 0.00
 5 35 0 6.38 0.00
 5 35 1 -1.13 0.00
 5 35 2 21.70 0.00
 5 35 3 2.24 0.00
 5 35 4 4.35 0.00
 5 35 5 -2.53 0.00
 5 35 6 5.21 0.00
 5 35 7 0.72 0.00
 5 35 8 2.02 0.00
 5 35 9 -3.56 0.00
 5 35 10 4.82 0.00
 5 35 11 -0.13 0.00
 5 35 12 -5.58 0.00
 5 35 13 -1.94 0.00
 5 35 14 -0.57 0.00
 5 37 0 -0.87 0.00
 5 37 1 -6.50 0.00
 5 37 2 5.58 0.00
 5 37 3 -6.61 0.00
 5 37 4 -1.18 0.00
 5 37 5 3.01 0.00
 5 37 6 -2.71 0.00
 5 37 7 4.18 0.00
 5 37 8 -3.16 0.00
 5 37 9 6.21 0.00
 5 37 10 8.46 0.00
 5 37 11 9.98 0.00
 5 37 12 -2.94 0.00
 5 37 13 4.15 0.00
 5 39 0 -17.10 0.00
 5 39 1 -4.64 0.00
 5 39 2 -7.92 0.00
 5 39 3 -8.43 0.00
 5 39 4 -6.26 0.00
 5 39 5 0.57 0.00
 5 39 6 -0.97 0.00
 5 39 7 12.90 0.00
 5 39 8 -3.54 0.00
 5 39 9 5.22 0.00
 5 39 10 -0.75 0.00
 5 39 11 6.00 0.00
 5 39 12 2.10 0.00
 5 41 0 -18.06 0.00
 5 41 1 4.06 0.00
 5 41 2 2.00 0.00
 5 41 3 4.35 0.00
 5 41 4 1.18 0.00
 5 41 5 0.98 0.00
 5 41 6 -8.34 0.00
 5 41 7 -3.57 0.00
 5 41 8 -4.01 0.00
 5 41 9 -0.38 0.00
 5 41 10 -0.62 0.00
 5 41 11 -7.95 0.00
 5 43 0 -8.73 0.00
 5 43 1 8.48 0.00
 5 43 2 2.30 0.00
 5 43 3 -3.11 0.00
 5 43 4 8.85 0.00
 5 43 5 -3.14 0.00
 5 43 6 15.34 0.00
 5 43 7 -7.44 0.00
 5 43 8 -0.91 0.00
 5 43 9 -3.20 0.00
 5 45 0 0.72 0.00
 5 45 1 3.87 0.00
 5 45 2 17.18 0.00
 5 45 3 0.19 0.00
 5 45 4 4.83 0.00
 5 45 5 -5.15 0.00
 5 45 6 -3.48 0.00
 5 45 7 -3.31 0.00
 5 47 0 -5.91 0.00
 5 47 1 4.65 0.00
 5 47 2 2.90 0.00
 5 47 3 -3.23 0.00
 5 47 4 -0.73 0.00
 5 47 5 -3.36 0.00
 6 0 0 31.50 0.00
 6 0 1 -9.53 0.00
 6 0 2 -81.18 0.00
 6 0 3 30.42 0.00
 6 0 4 39.14 0.00
 6 0 5 0.70 0.00
 6 0 6 -7.57 0.00
 6 0 7 7.99 0.00
 6 0 8 3.06 0.00
 6 0 9 -13.32 0.00
 6 0 10 -9.19 0.00
 6 0 11 16.80 0.00
 6 0 12 5.58 0.00
 6 0 13 5.92 0.00
 6 0 14 -10.94 0.00
 6 0 15 4.32 0.00
 6 0 16 20.98 0.00
 6 0 17 -1.20 0.00
 6 0 18 -10.87 0.00
 6 0 19 -6.76 0.00
 6 0 20 10.86 0.00
 6 2 0 -68.77 0.00
 6 2 1 16.48 0.00
 6 2 2 -13.27 0.00
 6 2 3 11.61 0.00
 6 2 4 50.79 0.00
 6 2 5 -1.75 0.00
 6 2 6 -1.55 0.00
 6 2 7 -23.23 0.00
 6 2 8 14.14 0.00
 6 2 9 4.00 0.00
 6 2 10 -1.28 0.00
 6 2 11 -0.20 0.00
 6 2 12 0.52 0.00
 6 2 13 0.68 0.00
 6 2 14 -13.05 0.00
 6 2 15 -4.45 0.00
 6 2 16 13.01 0.00
 6 2 17 0.44 0.00
 6 2 18 -3.15 0.00
 6 2 19 -3.37 0.00
 6 2 20 3.05 0.00
 6 4 0 -96.10 0.00
 6 4 1 -7.24 0.00
 6 4 2 -49.91 0.00
 6 4 3 11.09 0.00
 6 4 4 33.16 0.00
 6 4 5 -26.23 0.00
 6 4 6 -6.40 0.00
 6 4 7 14.09 0.00
 6 4 8 -10.68 0.00
 6 4 9 -5.49 0.00
 6 4 10 -1.87 0.00
 6 4 11 -8.33 0.00
 6 4 12 11.67 0.00
 6 4 13 -16.99 0.00
 6 4 14 -8.95 0.00
 6 4 15 -7.64 0.00
 6 4 16 4.25 0.00
 6 4 17 -0.12 0.00
 6 4 18 -5.35 0.00
 6 4 19 -2.01 0.00
 6 4 20 3.99 0.00
 6 6 0 5.65 0.00
 6 6 1 15.02 0.00
 6 6 2 12.00 0.00
 6 6 3 -9.56 0.00
 6 6 4 -15.47 0.00
 6 6 5 0.80 0.00
 6 6 6 7.27 0.00
 6 6 7 16.56 0.00
 6 6 8 -0.05 0.00
 6 6 9 3.97 0.00
 6 6 10 -5.20 0.00
 6 6 11 -12.16 0.00
 6 6 12 6.18 0.00
 6 6 13 1.89 0.00
 6 6 14 10.95 0.00
 6 6 15 -4.32 0.00
 6 6 16 -4.51 0.00
 6 6 17 -3.33 0.00
 6 6 18 -0.30 0.00
 6 6 19 -10.65 0.00
 6 6 20 5.44 0.00
 6 8 0 28.65 0.00
 6 8 1 -13.82 0.00
 6 8 2 61.51 0.00
 6 8 3 22.17 0.00
 6 8 4 -18.44 0.00
 6 8 5 13.54 0.00
 6 8 6 -0.32 0.00
 6 8 7 18.29 0.00
 6 8 8 2.91 0.00
 6 8 9 2.40 0.00
 6 8 10 1.86 0.00
 6 8 11 -1.44 0.00
 6 8 12 8.93 0.00
 6 8 13 -8.14 0.00
 6 8 14 15.84 0.00
 6 8 15 -3.71 0.00
 6 8 16 -2.62 0.00
 6 8 17 -5.95 0.00
 6 8 18 5.78 0.00
 6 8 19 -10.13 0.00
 6 8 20 4.58 0.00
 6 10 0 35.71 0.00
 6 10 1 -13.38 0.00
 6 10 2 -20.26 0.00
 6 10 3 -18.91 0.00
 6 10 4 -57.84 0.00
 6 10 5 -2.48 0.00
 6 10 6 -9.94 0.00
 6 10 7 -20.46 0.00
 6 10 8 -3.33 0.00
 6 10 9 -7.03 0.00
 6 10 10 9.64 0.00
 6 10 11 -8.33 0.00
 6 10 12 7.48 0.00
 6 10 13 3.46 0.00
 6 10 14 31.97 0.00
 6 10 15 -9.44 0.00
 6 10 16 1.04 0.00
 6 10 17 -7.75 0.00
 6 10 18 0.62 0.00
 6 10 19 -1.09 0.00
 6 10 20 0.00 0.00
 6 12 0 21.25 0.00
 6 12 1 -0.63 0.00
 6 12 2 -0.80 0.00
 6 12 3 -12.22 0.00
 6 12 4 -46.92 0.00
 6 12 5 -13.61 0.00
 6 12 6 -15.10 0.00
 6 12 7 -8.32 0.00
 6 12 8 -7.13 0.00
 6 12 9 0.63 0.00
 6 12 10 7.91 0.00
 6 12 11 5.01 0.00
 6 12 12 -5.53 0.00
 6 12 13 1.91 0.00
 6 12 14 1.11 0.00
 6 12 15 1.90 0.00
 6 12 16 0.23 0.00
 6 12 17 6.36 0.00
 6 12 18 -4.24 0.00
 6 12 19 2.73 0.00
 6 14 0 43.72 0.00
 6 14 1 -12.52 0.00
 6 14 2 -5.72 0.00
 6 14 3 -2.87 0.00
 6 14 4 1.05 0.00
 6 14 5 17.66 0.00
 6 14 6 -0.04 0.00
 6 14 7 5.20 0.00
 6 14 8 -3.17 0.00
 6 14 9 9.91 0.00
 6 14 10 5.91 0.00
 6 14 11 -2.21 0.00
 6 14 12 -8.28 0.00
 6 14 13 9.05 0.00
 6 14 14 -13.18 0.00
 6 14 15 -2.00 0.00
 6 14 16 1.63 0.00
 6 14 17 0.40 0.00
 6 14 18 -1.54 0.00
 6 14 19 7.45 0.00
 6 16 0 40.49 0.00
 6 16 1 46.22 0.00
 6 16 2 -4.51 0.00
 6 16 3 -3.77 0.00
 6 16 4 12.10 0.00
 6 16 5 -9.44 0.00
 6 16 6 -0.74 0.00
 6 16 7 0.21 0.00
 6 16 8 -22.30 0.00
 6 16 9 -2.28 0.00
 6 16 10 1.85 0.00
 6 16 11 4.99 0.00
 6 16 12 10.19 0.00
 6 16 13 -1.39 0.00
 6 16 14 -11.12 0.00
 6 16 15 3.22 0.00
 6 16 16 14.93 0.00
 6 16 17 3.52 0.00
 6 16 18 -0.97 0.00
 6 16 19 4.75 0.00
 6 18 0 3.83 0.00
 6 18 1 -24.94 0.00
 6 18 2 -15.50 0.00
 6 18 3 -7.96 0.00
 6 18 4 11.14 0.00
 6 18 5 -3.08 0.00
 6 18 6 -8.24 0.00
 6 18 7 -8.04 0.00
 6 18 8 -12.23 0.00
 6 18 9 -3.60 0.00
 6 18 10 -15.44 0.00
 6 18 11 -10.04 0.00
 6 18 12 -0.18 0.00
 6 18 13 -2.95 0.00
 6 18 14 -1.12 0.00
 6 18 15 3.02 0.00
 6 18 16 6.65 0.00
 6 18 17 -2.25 0.00
 6 18 18 -1.22 0.00
 6 18 19 8.94 0.00
 6 20 0 -9.20 0.00
 6 20 1 6.52 0.00
 6 20 2 -17.76 0.00
 6 20 3 -5.15 0.00
 6 20 4 4.34 0.00
 6 20 5 -9.27 0.00
 6 20 6 -4.85 0.00
 6 20 7 0.04 0.00
 6 20 8 -9.46 0.00
 6 20 9 2.30 0.00
 6 20 10 -9.83 0.00
 6 20 11 3.23 0.00
 6 20 12 6.94 0.00
 6 20 13 -1.92 0.00
 6 20 14 -5.47 0.00
 6 20 15 2.53 0.00
 6 20 16 -1.66 0.00
 6 20 17 -5.67 0.00
 6 20 18 -5.55 0.00
 6 22 0 -10.10 0.00
 6 22 1 -0.50 0.00
 6 22 2 -3.49 0.00
 6 22 3 4.04 0.00
 6 22 4 17.65 0.00
 6 22 5 4.28 0.00
 6 22 6 3.19 0.00
 6 22 7 3.12 0.00
 6 22 8 -1.14 0.00
 6 22 9 -0.95 0.00
 6 22 10 1.12 0.00
 6 22 11 -2.06 0.00
 6 22 12 -3.47 0.00
 6 22 13 6.34 0.00
 6 22 14 -1.93 0.00
 6 22 15 3.18 0.00
 6 22 16 2.31 0.00
 6 22 17 2.10 0.00
 6 22 18 11.59 0.00
 6 24 0 -8.11 0.00
 6 24 1 -2.81 0.00
 6 24 2 9.20 0.00
 6 24 3 -3.77 0.00
 6 24 4 4.68 0.00
 6 24 5 1.22 0.00
 6 24 6 5.76 0.00
 6 24 7 10.78 0.00
 6 24 8 -10.70 0.00
 6 24 9 -3.35 0.00
 6 24 10 1.89 0.00
 6 24 11 6.42 0.00
 6 24 12 0.29 0.00
 6 24 13 3.78 0.00
 6 24 14 6.11 0.00
 6 24 15 1.39 0.00
 6 24 16 5.57 0.00
 6 24 17 7.93 0.00
 6 26 0 -0.15 0.00
 6 26 1 -19.73 0.00
 6 26 2 5.76 0.00
 6 26 3 -1.54 0.00
 6 26 4 -2.10 0.00
 6 26 5 1.18 0.00
 6 26 6 3.00 0.00
 6 26 7 -1.03 0.00
 6 26 8 6.07 0.00
 6 26 9 -3.56 0.00
 6 26 10 12.00 0.00
 6 26 11 -3.30 0.00
 6 26 12 0.67 0.00
 6 26 13 2.77 0.00
 6 26 14 7.67 0.00
 6 26 15 -10.42 0.00
 6 26 16 -0.44 0.00
 6 26 17 -0.58 0.00
 6 28 0 -10.00 0.00
 6 28 1 -10.13 0.00
 6 28 2 8.75 0.00
 6 28 3 5.75 0.00
 6 28 4 -9.18 0.00
 6 28 5 4.36 0.00
 6 28 6 7.53 0.00
 6 28 7 0.68 0.00
 6 28 8 5.97 0.00
 6 28 9 -2.96 0.00
 6 28 10 11.56 0.00
 6 28 11 -1.28 0.00
 6 28 12 -3.18 0.00
 6 28 13 3.72 0.00
 6 28 14 -0.70 0.00
 6 28 15 -2.39 0.00
 6 28 16 -2.31 0.00
 6 30 0 2.73 0.00
 6 30 1 -1.46 0.00
 6 30 2 -1.56 0.00
 6 30 3 15.99 0.00
 6 30 4 -7.16 0.00
 6 30 5 5.62 0.00
 6 30 6 2.20 0.00
 6 30 7 9.04 0.00
 6 30 8 8.35 0.00
 6 30 9 7.20 0.00
 6 30 10 1.86 0.00
 6 30 11 -6.12 0.00
 6 30 12 5.60 0.00
 6 30 13 3.65 0.00
 6 30 14 2.63 0.00
 6 30 15 -6.85 0.00
 6 30 16 -0.65 0.00
 6 32 0 1.47 0.00
 6 32 1 11.02 0.00
 6 32 2 -0.13 0.00
 6 32 3 6.96 0.00
 6 32 4 -4.94 0.00
 6 32 5 -3.54 0.00
 6 32 6 7.45 0.00
 6 32 7 1.08 0.00
 6 32 8 0.83 0.00
 6 32 9 0.33 0.00
 6 32 10 -1.42 0.00
 6 32 11 -8.19 0.00
 6 32 12 -10.23 0.00
 6 32 13 -0.42 0.00
 6 32 14 -6.48 0.00
 6 32 15 0.08 0.00
 6 34 0 -4.06 0.00
 6 34 1 -2.09 0.00
 6 34 2 -15.90 0.00
 6 34 3 4.60 0.00
 6 34 4 -0.29 0.00
 6 34 5 -2.88 0.00
 6 34 6 1.37 0.00
 6 34 7 -0.43 0.00
 6 34 8 -4.33 0.00
 6 34 9 1.36 0.00
 6 34 10 -7.51 0.00
 6 34 11 -4.29 0.00
 6 34 12 6.95 0.00
 6 34 13 0.38 0.00
 6 34 14 -5.66 0.00
 6 36 0 7.42 0.00
 6 36 1 1.82 0.00
 6 36 2 4.00 0.00
 6 36 3 9.10 0.00
 6 36 4 6.18 0.00
 6 36 5 2.60 0.00
 6 36 6 7.34 0.00
 6 36 7 -0.16 0.00
 6 36 8 0.90 0.00
 6 36 9 5.08 0.00
 6 36 10 11.00 0.00
 6 36 11 0.80 0.00
 6 36 12 2.47 0.00
 6 36 13 0.84 0.00
 6 38 0 14.56 0.00
 6 38 1 12.50 0.00
 6 38 2 -0.30 0.00
 6 38 3 1.39 0.00
 6 38 4 1.49 0.00
 6 38 5 3.68 0.00
 6 38 6 3.11 0.00
 6 38 7 -2.83 0.00
 6 38 8 -0.39 0.00
 6 38 9 2.77 0.00
 6 38 10 -7.94 0.00
 6 38 11 1.96 0.00
 6 38 12 7.23 0.00
 6 40 0 -9.71 0.00
 6 40 1 -9.40 0.00
 6 40 2 -1.50 0.00
 6 40 3 3.69 0.00
 6 40 4 2.63 0.00
 6 40 5 1.57 0.00
 6 40 6 4.73 0.00
 6 40 7 -4.92 0.00
 6 40 8 3.47 0.00
 6 40 9 5.12 0.00
 6 40 10 9.06 0.00
 6 40 11 5.39 0.00
 6 42 0 -4.49 0.00
 6 42 1 -12.41 0.00
 6 42 2 -4.97 0.00
 6 42 3 -6.56 0.00
 6 42 4 -1.18 0.00
 6 42 5 4.14 0.00
 6 42 6 -2.24 0.00
 6 42 7 -1.53 0.00
 6 42 8 1.09 0.00
 6 42 9 1.25 0.00
 6 44 0 -2.42 0.00
 6 44 1 -0.41 0.00
 6 44 2 2.10 0.00
 6 44 3 6.29 0.00
 6 44 4 -10.01 0.00
 6 44 5 9.37 0.00
 6 44 6 -4.14 0.00
 6 44 7 2.97 0.00
 6 44 8 -4.89 0.00
 6 46 0 0.64 0.00
 6 46 1 2.82 0.00
 6 46 2 -0.38 0.00
 6 46 3 -1.89 0.00
 6 46 4 2.41 0.00
 6 46 5 -1.46 0.00
 6 46 6 4.61 0.00
 6 48 2 -1.04 0.00
 6 48 3 -0.70 0.00
 7 1 0 -4.63 0.00
 7 1 1 8.24 0.00
 7 1 2 12.46 0.00
 7 1 3 -0.15 0.00
 7 1 4 0.39 0.00
 7 1 5 16.31 0.00
 7 1 6 8.37 0.00
 7 1 7 2.88 0.00
 7 1 8 -17.82 0.00
 7 1 9 2.92 0.00
 7 1 10 0.89 0.00
 7 1 11 -18.42 0.00
 7 1 12 -12.08 0.00
 7 1 13 -21.52 0.00
 7 1 14 -0.42 0.00
 7 1 15 -2.57 0.00
 7 1 16 -1.14 0.00
 7 1 17 1.35 0.00
 7 1 18 2.00 0.00
 7 1 19 -1.64 0.00
 7 1 20 -0.73 0.00
 7 3 0 -2.14 0.00
 7 3 1 -67.09 0.00
 7 3 2 35.46 0.00
 7 3 3 15.07 0.00
 7 3 4 -16.91 0.00
 7 3 5 36.16 0.00
 7 3 6 0.67 0.00
 7 3 7 -10.12 0.00
 7 3 8 -9.79 0.00
 7 3 9 -0.08 0.00
 7 3 10 3.71 0.00
 7 3 11 2.78 0.00
 7 3 12 -5.04 0.00
 7 3 13 -6.86 0.00
 7 3 14 1.95 0.00
 7 3 15 3.59 0.00
 7 3 16 4.21 0.00
 7 3 17 6.78 0.00
 7 3 18 9.90 0.00
 7 3 19 -4.75 0.00
 7 3 20 1.62 0.00
 7 5 0 22.28 0.00
 7 5 1 -26.57 0.00
 7 5 2 21.60 0.00
 7 5 3 19.15 0.00
 7 5 4 -4.68 0.00
 7 5 5 -4.98 0.00
 7 5 6 10.89 0.00
 7 5 7 -15.64 0.00
 7 5 8 11.46 0.00
 7 5 9 -23.72 0.00
 7 5 10 5.75 0.00
 7 5 11 -12.10 0.00
 7 5 12 -12.09 0.00
 7 5 13 0.78 0.00
 7 5 14 6.62 0.00
 7 5 15 -0.11 0.00
 7 5 16 4.36 0.00
 7 5 17 8.93 0.00
 7 5 18 0.11 0.00
 7 5 19 -1.35 0.00
 7 5 20 -11.89 0.00
 7 7 0 -64.85 0.00
 7 7 1 -28.88 0.00
 7 7 2 -8.20 0.00
 7 7 3 6.91 0.00
 7 7 4 -15.39 0.00
 7 7 5 10.70 0.00
 7 7 6 16.06 0.00
 7 7 7 8.03 0.00
 7 7 8 6.58 0.00
 7 7 9 5.62 0.00
 7 7 10 0.09 0.00
 7 7 11 2.21 0.00
 7 7 12 -6.65 0.00
 7 7 13 12.92 0.00
 7 7 14 -6.18 0.00
 7 7 15 -2.81 0.00
 7 7 16 -11.71 0.00
 7 7 17 0.92 0.00
 7 7 18 -10.35 0.00
 7 7 19 -4.17 0.00
 7 7 20 -10.71 0.00
 7 9 0 -28.39 0.00
 7 9 1 1.51 0.00
 7 9 2 -5.86 0.00
 7 9 3 -3.14 0.00
 7 9 4 9.12 0.00
 7 9 5 -18.34 0.00
 7 9 6 -5.43 0.00
 7 9 7 9.75 0.00
 7 9 8 1.30 0.00
 7 9 9 17.46 0.00
 7 9 10 10.18 0.00
 7 9 11 4.66 0.00
 7 9 12 3.97 0.00
 7 9 13 13.31 0.00
 7 9 14 2.47 0.00
 7 9 15 5.62 0.00
 7 9 16 0.06 0.00
 7 9 17 -0.88 0.00
 7 9 18 -2.81 0.00
 7 9 19 -8.18 0.00
 7 11 0 -17.85 0.00
 7 11 1 -3.00 0.00
 7 11 2 -32.75 0.00
 7 11 3 -22.80 0.00
 7 11 4 -8.84 0.00
 7 11 5 -14.71 0.00
 7 11 6 -7.12 0.00
 7 11 7 7.08 0.00
 7 11 8 6.94 0.00
 7 11 9 18.72 0.00
 7 11 10 4.04 0.00
 7 11 11 -8.77 0.00
 7 11 12 8.43 0.00
 7 11 13 7.40 0.00
 7 11 14 2.75 0.00
 7 11 15 2.47 0.00
 7 11 16 3.52 0.00
 7 11 17 0.66 0.00
 7 11 18 7.20 0.00
 7 11 19 -8.12 0.00
 7 13 0 9.39 0.00
 7 13 1 -24.58 0.00
 7 13 2 15.91 0.00
 7 13 3 -40.67 0.00
 7 13 4 3.93 0.00
 7 13 5 -29.71 0.00
 7 13 6 -2.57 0.00
 7 13 7 -5.51 0.00
 7 13 8 1.70 0.00
 7 13 9 5.32 0.00
 7 13 10 -0.71 0.00
 7 13 11 1.22 0.00
 7 13 12 3.37 0.00
 7 13 13 -11.35 0.00
 7 13 14 -2.34 0.00
 7 13 15 -0.50 0.00
 7 13 16 0.94 0.00
 7 13 17 1.25 0.00
 7 13 18 0.41 0.00
 7 13 19 -4.62 0.00
 7 15 0 15.86 0.00
 7 15 1 12.15 0.00
 7 15 2 -9.81 0.00
 7 15 3 -8.99 0.00
 7 15 4 4.03 0.00
 7 15 5 7.00 0.00
 7 15 6 12.06 0.00
 7 15 7 -17.88 0.00
 7 15 8 -4.83 0.00
 7 15 9 -2.44 0.00
 7 15 10 -8.85 0.00
 7 15 11 3.14 0.00
 7 15 12 -3.18 0.00
 7 15 13 -11.44 0.00
 7 15 14 1.74 0.00
 7 15 15 -2.94 0.00
 7 15 16 -2.81 0.00
 7 15 17 10.88 0.00
 7 15 18 2.25 0.00
 7 15 19 -0.34 0.00
 7 17 0 -7.74 0.00
 7 17 1 23.98 0.00
 7 17 2 8.51 0.00
 7 17 3 12.17 0.00
 7 17 4 -12.29 0.00
 7 17 5 9.07 0.00
 7 17 6 15.55 0.00
 7 17 7 5.29 0.00
 7 17 8 2.61 0.00
 7 17 9 -3.67 0.00
 7 17 10 5.27 0.00
 7 17 11 17.54 0.00
 7 17 12 -2.95 0.00
 7 17 13 1.35 0.00
 7 17 14 2.75 0.00
 7 17 15 -2.40 0.00
 7 17 16 -0.26 0.00
 7 17 17 4.52 0.00
 7 17 18 9.39 0.00
 7 17 19 0.17 0.00
 7 19 0 -17.76 0.00
 7 19 1 6.37 0.00
 7 19 2 3.93 0.00
 7 19 3 3.49 0.00
 7 19 4 -6.17 0.00
 7 19 5 12.98 0.00
 7 19 6 -5.51 0.00
 7 19 7 -4.20 0.00
 7 19 8 -11.10 0.00
 7 19 9 19.52 0.00
 7 19 10 -4.73 0.00
 7 19 11 13.72 0.00
 7 19 12 -15.10 0.00
 7 19 13 5.66 0.00
 7 19 14 4.17 0.00
 7 19 15 -5.70 0.00
 7 19 16 -1.69 0.00
 7 19 17 -1.89 0.00
 7 19 18 -0.88 0.00
 7 21 0 -20.13 0.00
 7 21 1 -14.81 0.00
 7 21 2 -4.74 0.00
 7 21 3 -8.86 0.00
 7 21 4 -4.93 0.00
 7 21 5 -10.00 0.00
 7 21 6 12.50 0.00
 7 21 7 -18.57 0.00
 7 21 8 -7.22 0.00
 7 21 9 -31.99 0.00
 7 21 10 -7.12 0.00
 7 21 11 -7.66 0.00
 7 21 12 -10.84 0.00
 7 21 13 -8.77 0.00
 7 21 14 -1.43 0.00
 7 21 15 -4.88 0.00
 7 21 16 -3.46 0.00
 7 21 17 4.98 0.00
 7 21 18 4.56 0.00
 7 23 0 -5.91 0.00
 7 23 1 -12.23 0.00
 7 23 2 2.20 0.00
 7 23 3 -12.34 0.00
 7 23 4 -13.85 0.00
 7 23 5 -3.28 0.00
 7 23 6 -5.64 0.00
 7 23 7 -11.76 0.00
 7 23 8 12.70 0.00
 7 23 9 6.99 0.00
 7 23 10 3.13 0.00
 7 23 11 0.25 0.00
 7 23 12 0.82 0.00
 7 23 13 -2.74 0.00
 7 23 14 -6.62 0.00
 7 23 15 0.32 0.00
 7 23 16 1.81 0.00
 7 23 17 2.95 0.00
 7 25 0 -12.21 0.00
 7 25 1 2.58 0.00
 7 25 2 -14.40 0.00
 7 25 3 4.27 0.00
 7 25 4 -7.03 0.00
 7 25 5 15.27 0.00
 7 25 6 0.38 0.00
 7 25 7 14.64 0.00
 7 25 8 -0.65 0.00
 7 25 9 4.46 0.00
 7 25 10 4.66 0.00
 7 25 11 6.40 0.00
 7 25 12 15.16 0.00
 7 25 13 -4.14 0.00
 7 25 14 1.21 0.00
 7 25 15 3.96 0.00
 7 25 16 0.53 0.00
 7 25 17 -6.07 0.00
 7 27 0 -16.37 0.00
 7 27 1 7.21 0.00
 7 27 2 -7.49 0.00
 7 27 3 6.47 0.00
 7 27 4 2.67 0.00
 7 27 5 9.93 0.00
 7 27 6 -3.51 0.00
 7 27 7 4.70 0.00
 7 27 8 12.72 0.00
 7 27 9 0.95 0.00
 7 27 10 -2.01 0.00
 7 27 11 -1.12 0.00
 7 27 12 5.45 0.00
 7 27 13 -1.32 0.00
 7 27 14 -4.22 0.00
 7 27 15 2.20 0.00
 7 27 16 2.51 0.00
 7 29 0 3.64 0.00
 7 29 1 -0.85 0.00
 7 29 2 10.85 0.00
 7 29 3 -3.50 0.00
 7 29 4 3.53 0.00
 7 29 5 -3.95 0.00
 7 29 6 -3.24 0.00
 7 29 7 5.97 0.00
 7 29 8 3.66 0.00
 7 29 9 2.88 0.00
 7 29 10 -4.00 0.00
 7 29 11 0.42 0.00
 7 29 12 -0.09 0.00
 7 29 13 0.31 0.00
 7 29 14 -0.05 0.00
 7 29 15 5.36 0.00
 7 29 16 -3.86 0.00
 7 31 0 -2.47 0.00
 7 31 1 -4.81 0.00
 7 31 2 6.42 0.00
 7 31 3 -8.41 0.00
 7 31 4 -2.17 0.00
 7 31 5 -1.01 0.00
 7 31 6 -9.10 0.00
 7 31 7 -5.02 0.00
 7 31 8 2.59 0.00
 7 31 9 -2.21 0.00
 7 31 10 -1.63 0.00
 7 31 11 8.52 0.00
 7 31 12 4.38 0.00
 7 31 13 5.55 0.00
 7 31 14 3.83 0.00
 7 31 15 1.40 0.00
 7 33 0 12.91 0.00
 7 33 1 7.63 0.00
 7 33 2 22.47 0.00
 7 33 3 0.57 0.00
 7 33 4 7.04 0.00
 7 33 5 9.08 0.00
 7 33 6 0.76 0.00
 7 33 7 0.63 0.00
 7 33 8 0.69 0.00
 7 33 9 2.82 0.00
 7 33 10 -2.65 0.00
 7 33 11 11.61 0.00
 7 33 12 -3.64 0.00
 7 33 13 5.43 0.00
 7 33 14 6.50 0.00
 7 35 0 -6.91 0.00
 7 35 1 12.58 0.00
 7 35 2 6.80 0.00
 7 35 3 2.42 0.00
 7 35 4 4.38 0.00
 7 35 5 0.58 0.00
 7 35 6 1.31 0.00
 7 35 7 -5.16 0.00
 7 35 8 0.90 0.00
 7 35 9 -1.96 0.00
 7 35 10 -1.50 0.00
 7 35 11 6.70 0.00
 7 35 12 -2.62 0.00
 7 35 13 1.27 0.00
 7 37 0 -14.83 0.00
 7 37 1 6.35 0.00
 7 37 2 -12.90 0.00
 7 37 3 -4.24 0.00
 7 37 4 1.02 0.00
 7 37 5 1.46 0.00
 7 37 6 -5.05 0.00
 7 37 7 -8.98 0.00
 7 37 8 -2.86 0.00
 7 37 9 -2.61 0.00
 7 37 10 2.89 0.00
 7 37 11 3.04 0.00
 7 37 12 -0.61 0.00
 7 39 0 4.37 0.00
 7 39 1 4.09 0.00
 7 39 2 -6.77 0.00
 7 39 3 -1.45 0.00
 7 39 4 0.87 0.00
 7 39 5 -2.22 0.00
 7 39 6 -0.96 0.00
 7 39 7 -0.44 0.00
 7 39 8 -2.70 0.00
 7 39 9 -8.09 0.00
 7 39 10 -7.30 0.00
 7 39 11 -3.68 0.00
 7 41 0 9.22 0.00
 7 41 1 0.21 0.00
 7 41 2 6.64 0.00
 7 41 3 6.23 0.00
 7 41 4 13.51 0.00
 7 41 5 -0.72 0.00
 7 41 6 -3.08 0.00
 7 41 7 -5.81 0.00
 7 41 8 5.84 0.00
 7 41 9 -3.57 0.00
 7 43 0 -2.51 0.00
 7 43 1 -4.67 0.00
 7 43 2 -13.59 0.00
 7 43 3 -1.38 0.00
 7 43 4 4.88 0.00
 7 43 5 2.73 0.00
 7 43 6 19.36 0.00
 7 43 7 5.95 0.00
 7 43 8 8.41 0.00
 7 45 0 -5.79 0.00
 7 45 1 -13.15 0.00
 7 45 2 -9.79 0.00
 7 45 3 -4.08 0.00
 7 45 4 -11.18 0.00
 7 45 5 2.01 0.00
 7 45 6 -6.12 0.00
 7 47 2 -1.48 0.00
 7 47 3 -1.10 0.00
 8 0 0 95.74 0.00
 8 0 1 4.80 0.00
 8 0 2 -33.04 0.00
 8 0 3 2.53 0.00
 8 0 4 -44.49 0.00
 8 0 5 4.72 0.00
 8 0 6 -3.63 0.00
 8 0 7 11.77 0.00
 8 0 8 18.07 0.00
 8 0 9 -8.28 0.00
 8 0 10 0.30 0.00
 8 0 11 0.59 0.00
 8 0 12 -7.57 0.00
 8 0 13 -6.24 0.00
 8 0 14 6.72 0.00
 8 0 15 -1.49 0.00
 8 0 16 4.47 0.00
 8 0 17 1.22 0.00
 8 0 18 -8.80 0.00
 8 0 19 -4.56 0.00
 8 0 20 1.88 0.00
 8 2 0 51.99 0.00
 8 2 1 -17.92 0.00
 8 2 2 -3.57 0.00
 8 2 3 -17.21 0.00
 8 2 4 -20.41 0.00
 8 2 5 4.42 0.00
 8 2 6 -6.98 0.00
 8 2 7 -13.93 0.00
 8 2 8 7.37 0.00
 8 2 9 0.64 0.00
 8 2 10 0.37 0.00
 8 2 11 -6.47 0.00
 8 2 12 -12.27 0.00
 8 2 13 -1.69 0.00
 8 2 14 -6.42 0.00
 8 2 15 0.17 0.00
 8 2 16 4.65 0.00
 8 2 17 8.29 0.00
 8 2 18 3.74 0.00
 8 2 19 0.11 0.00
 8 2 20 -5.86 0.00
 8 4 0 -21.53 0.00
 8 4 1 -17.01 0.00
 8 4 2 -2.29 0.00
 8 4 3 -18.08 0.00
 8 4 4 -1.00 0.00
 8 4 5 -27.27 0.00
 8 4 6 -9.29 0.00
 8 4 7 13.17 0.00
 8 4 8 -19.23 0.00
 8 4 9 10.30 0.00
 8 4 10 3.23 0.00
 8 4 11 6.92 0.00
 8 4 12 -8.23 0.00
 8 4 13 0.18 0.00
 8 4 14 -9.53 0.00
 8 4 15 6.77 0.00
 8 4 16 6.30 0.00
 8 4 17 5.87 0.00
 8 4 18 4.95 0.00
 8 4 19 -3.80 0.00
 8 4 20 -5.44 0.00
 8 6 0 13.56 0.00
 8 6 1 4.23 0.00
 8 6 2 21.22 0.00
 8 6 3 7.15 0.00
 8 6 4 10.05 0.00
 8 6 5 18.26 0.00
 8 6 6 2.19 0.00
 8 6 7 4.45 0.00
 8 6 8 -20.13 0.00
 8 6 9 4.90 0.00
 8 6 10 8.13 0.00
 8 6 11 5.24 0.00
 8 6 12 -5.32 0.00
 8 6 13 12.52 0.00
 8 6 14 -1.49 0.00
 8 6 15 7.41 0.00
 8 6 16 -0.07 0.00
 8 6 17 2.64 0.00
 8 6 18 2.68 0.00
 8 6 19 -2.83 0.00
 8 8 0 -38.39 0.00
 8 8 1 -25.99 0.00
 8 8 2 44.83 0.00
 8 8 3 15.65 0.00
 8 8 4 17.66 0.00
 8 8 5 -2.05 0.00
 8 8 6 19.34 0.00
 8 8 7 -3.83 0.00
 8 8 8 -7.63 0.00
 8 8 9 -3.25 0.00
 8 8 10 0.97 0.00
 8 8 11 -3.22 0.00
 8 8 12 -21.59 0.00
 8 8 13 -3.37 0.00
 8 8 14 -11.38 0.00
 8 8 15 6.11 0.00
 8 8 16 -5.23 0.00
 8 8 17 5.65 0.00
 8 8 18 2.23 0.00
 8 8 19 3.75 0.00
 8 10 0 -16.54 0.00
 8 10 1 -6.62 0.00
 8 10 2 12.58 0.00
 8 10 3 -10.08 0.00
 8 10 4 13.34 0.00
 8 10 5 -1.19 0.00
 8 10 6 13.67 0.00
 8 10 7 -20.99 0.00
 8 10 8 0.74 0.00
 8 10 9 0.47 0.00
 8 10 10 18.15 0.00
 8 10 11 -2.91 0.00
 8 10 12 -16.64 0.00
 8 10 13 -1.89 0.00
 8 10 14 4.89 0.00
 8 10 15 -3.13 0.00
 8 10 16 -3.33 0.00
 8 10 17 -1.28 0.00
 8 10 18 0.79 0.00
 8 10 19 8.42 0.00
 8 12 0 -29.85 0.00
 8 12 1 12.38 0.00
 8 12 2 13.31 0.00
 8 12 3 2.74 0.00
 8 12 4 -0.58 0.00
 8 12 5 -3.58 0.00
 8 12 6 8.02 0.00
 8 12 7 5.39 0.00
 8 12 8 -10.38 0.00
 8 12 9 5.28 0.00
 8 12 10 -4.45 0.00
 8 12 11 6.32 0.00
 8 12 12 -9.68 0.00
 8 12 13 -0.41 0.00
 8 12 14 -1.21 0.00
 8 12 15 4.28 0.00
 8 12 16 -1.83 0.00
 8 12 17 7.82 0.00
 8 12 18 1.28 0.00
 8 12 19 2.52 0.00
 8 14 0 -31.29 0.00
 8 14 1 -11.14 0.00
 8 14 2 -12.45 0.00
 8 14 3 -15.36 0.00
 8 14 4 4.99 0.00
 8 14 5 14.17 0.00
 8 14 6 1.86 0.00
 8 14 7 6.14 0.00
 8 14 8 0.07 0.00
 8 14 9 0.57 0.00
 8 14 10 13.58 0.00
 8 14 11 -2.70 0.00
 8 14 12 5.52 0.00
 8 14 13 2.30 0.00
 8 14 14 -3.97 0.00
 8 14 15 0.70 0.00
 8 14 16 0.21 0.00
 8 14 17 1.31 0.00
 8 14 18 0.60 0.00
 8 14 19 8.55 0.00
 8 16 0 -13.77 0.00
 8 16 1 15.25 0.00
 8 16 2 -19.19 0.00
 8 16 3 -10.43 0.00
 8 16 4 -1.75 0.00
 8 16 5 -16.58 0.00
 8 16 6 -0.30 0.00
 8 16 7 -4.27 0.00
 8 16 8 0.80 0.00
 8 16 9 -17.00 0.00
 8 16 10 10.83 0.00
 8 16 11 3.11 0.00
 8 16 12 21.90 0.00
 8 16 13 -3.24 0.00
 8 16 14 -4.42 0.00
 8 16 15 -2.11 0.00
 8 16 16 4.47 0.00
 8 16 17 0.68 0.00
 8 16 18 -2.17 0.00
 8 18 0 -1.94 0.00
 8 18 1 -16.41 0.00
 8 18 2 -5.49 0.00
 8 18 3 -6.54 0.00
 8 18 4 4.55 0.00
 8 18 5 7.40 0.00
 8 18 6 2.41 0.00
 8 18 7 7.79 0.00
 8 18 8 14.98 0.00
 8 18 9 1.26 0.00
 8 18 10 -0.80 0.00
 8 18 11 -0.37 0.00
 8 18 12 1.33 0.00
 8 18 13 2.29 0.00
 8 18 14 -4.26 0.00
 8 18 15 3.21 0.00
 8 18 16 3.16 0.00
 8 18 17 -2.55 0.00
 8 18 18 1.96 0.00
 8 20 0 14.39 0.00
 8 20 1 -8.71 0.00
 8 20 2 9.25 0.00
 8 20 3 9.06 0.00
 8 20 4 12.07 0.00
 8 20 5 4.59 0.00
 8 20 6 9.90 0.00
 8 20 7 14.26 0.00
 8 20 8 17.81 0.00
 8 20 9 4.13 0.00
 8 20 10 2.29 0.00
 8 20 11 1.51 0.00
 8 20 12 9.88 0.00
 8 20 13 -3.71 0.00
 8 20 14 -1.50 0.00
 8 20 15 -1.26 0.00
 8 20 16 -0.92 0.00
 8 20 17 -1.86 0.00
 8 20 18 -6.44 0.00
 8 22 0 9.96 0.00
 8 22 1 -13.02 0.00
 8 22 2 -6.74 0.00
 8 22 3 -10.45 0.00
 8 22 4 -5.80 0.00
 8 22 5 -6.66 0.00
 8 22 6 -6.64 0.00
 8 22 7 -0.74 0.00
 8 22 8 -1.23 0.00
 8 22 9 2.38 0.00
 8 22 10 1.18 0.00
 8 22 11 -4.10 0.00
 8 22 12 -4.20 0.00
 8 22 13 -0.95 0.00
 8 22 14 -5.90 0.00
 8 22 15 -3.23 0.00
 8 22 16 -2.44 0.00
 8 22 17 2.58 0.00
 8 24 0 -18.57 0.00
 8 24 1 -3.00 0.00
 8 24 2 -13.87 0.00
 8 24 3 -1.76 0.00
 8 24 4 -21.60 0.00
 8 24 5 -9.22 0.00
 8 24 6 -5.82 0.00
 8 24 7 0.10 0.00
 8 24 8 -6.33 0.00
 8 24 9 -1.36 0.00
 8 24 10 2.80 0.00
 8 24 11 0.92 0.00
 8 24 12 -4.82 0.00
 8 24 13 -4.11 0.00
 8 24 14 -2.43 0.00
 8 24 15 -3.45 0.00
 8 24 16 -2.93 0.00
 8 24 17 7.32 0.00
 8 26 0 9.16 0.00
 8 26 1 -3.59 0.00
 8 26 2 -1.31 0.00
 8 26 3 5.99 0.00
 8 26 4 -5.37 0.00
 8 26 5 3.86 0.00
 8 26 6 -0.22 0.00
 8 26 7 3.73 0.00
 8 26 8 -6.96 0.00
 8 26 9 13.05 0.00
 8 26 10 2.95 0.00
 8 26 11 -1.19 0.00
 8 26 12 -0.92 0.00
 8 26 13 2.08 0.00
 8 26 14 -0.15 0.00
 8 26 15 -6.98 0.00
 8 26 16 -2.46 0.00
 8 28 0 -8.97 0.00
 8 28 1 3.42 0.00
 8 28 2 10.26 0.00
 8 28 3 8.07 0.00
 8 28 4 3.15 0.00
 8 28 5 0.49 0.00
 8 28 6 3.96 0.00
 8 28 7 -2.57 0.00
 8 28 8 -7.61 0.00
 8 28 9 3.61 0.00
 8 28 10 3.34 0.00
 8 28 11 -2.36 0.00
 8 28 12 -6.64 0.00
 8 28 13 2.79 0.00
 8 28 14 -5.10 0.00
 8 28 15 1.02 0.00
 8 28 16 7.65 0.00
 8 30 0 -1.08 0.00
 8 30 1 -12.23 0.00
 8 30 2 1.40 0.00
 8 30 3 2.79 0.00
 8 30 4 7.11 0.00
 8 30 5 -5.61 0.00
 8 30 6 1.80 0.00
 8 30 7 -7.64 0.00
 8 30 8 -4.90 0.00
 8 30 9 1.23 0.00
 8 30 10 1.44 0.00
 8 30 11 -8.88 0.00
 8 30 12 9.84 0.00
 8 30 13 3.62 0.00
 8 30 14 -2.50 0.00
 8 30 15 -1.42 0.00
 8 32 0 -8.03 0.00
 8 32 1 0.63 0.00
 8 32 2 -1.74 0.00
 8 32 3 0.33 0.00
 8 32 4 6.10 0.00
 8 32 5 -6.76 0.00
 8 32 6 2.48 0.00
 8 32 7 -1.33 0.00
 8 32 8 1.32 0.00
 8 32 9 4.17 0.00
 8 32 10 10.93 0.00
 8 32 11 -1.25 0.00
 8 32 12 8.60 0.00
 8 32 13 1.57 0.00
 8 32 14 2.66 0.00
 8 34 0 -5.97 0.00
 8 34 1 -8.10 0.00
 8 34 2 -13.42 0.00
 8 34 3 2.07 0.00
 8 34 4 4.94 0.00
 8 34 5 -2.03 0.00
 8 34 6 -1.49 0.00
 8 34 7 0.20 0.00
 8 34 8 -0.66 0.00
 8 34 9 4.46 0.00
 8 34 10 6.82 0.00
 8 34 11 5.23 0.00
 8 34 12 23.03 0.00
 8 34 13 3.80 0.00
 8 34 14 -3.10 0.00
 8 36 0 1.60 0.00
 8 36 1 2.31 0.00
 8 36 2 -3.12 0.00
 8 36 3 6.65 0.00
 8 36 4 4.26 0.00
 8 36 5 -5.13 0.00
 8 36 6 -2.50 0.00
 8 36 7 -0.08 0.00
 8 36 8 0.02 0.00
 8 36 9 -0.38 0.00
 8 36 10 5.60 0.00
 8 36 11 -1.76 0.00
 8 36 12 7.03 0.00
 8 38 0 13.32 0.00
 8 38 1 -3.34 0.00
 8 38 2 -3.46 0.00
 8 38 3 -9.38 0.00
 8 38 4 -0.82 0.00
 8 38 5 1.52 0.00
 8 38 6 -2.77 0.00
 8 38 7 3.05 0.00
 8 38 8 -1.94 0.00
 8 38 9 -1.97 0.00
 8 38 10 -12.08 0.00
 8 38 11 -7.26 0.00
 8 40 0 0.98 0.00
 8 40 1 -6.63 0.00
 8 40 2 2.46 0.00
 8 40 3 3.76 0.00
 8 40 4 4.75 0.00
 8 40 5 -2.54 0.00
 8 40 6 -2.20 0.00
 8 40 7 1.75 0.00
 8 40 8 -5.10 0.00
 8 40 9 2.41 0.00
 8 42 0 1.20 0.00
 8 42 1 0.41 0.00
 8 42 2 0.69 0.00
 8 42 3 -2.92 0.00
 8 42 4 4.14 0.00
 8 42 5 1.28 0.00
 8 42 6 -6.69 0.00
 8 42 7 -1.10 0.00
 8 42 8 2.52 0.00
 8 42 9 4.96 0.00
 8 44 0 3.43 0.00
 8 44 1 -1.04 0.00
 8 44 2 3.21 0.00
 8 44 3 1.79 0.00
 8 44 4 -4.24 0.00
 8 44 5 8.46 0.00
 8 44 6 0.36 0.00
 8 46 2 -0.27 0.00
 8 46 3 -12.71 0.00
 8 46 4 7.54 0.00
 9 1 0 -48.44 0.00
 9 1 1 112.13 0.00
 9 1 2 -22.48 0.00
 9 1 3 -17.59 0.00
 9 1 4 9.90 0.00
 9 1 5 -26.28 0.00
 9 1 6 -13.14 0.00
 9 1 7 2.04 0.00
 9 1 8 0.20 0.00
 9 1 9 -2.11 0.00
 9 1 10 1.29 0.00
 9 1 11 -0.15 0.00
 9 1 12 1.28 0.00
 9 1 13 1.07 0.00
 9 1 14 -2.21 0.00
 9 1 15 14.03 0.00
 9 1 16 1.25 0.00
 9 1 17 1.47 0.00
 9 1 18 -3.51 0.00
 9 1 19 2.88 0.00
 9 3 0 -38.70 0.00
 9 3 1 56.66 0.00
 9 3 2 -22.97 0.00
 9 3 3 2.25 0.00
 9 3 4 -11.52 0.00
 9 3 5 -5.33 0.00
 9 3 6 -8.39 0.00
 9 3 7 5.62 0.00
 9 3 8 12.36 0.00
 9 3 9 18.25 0.00
 9 3 10 9.42 0.00
 9 3 11 22.92 0.00
 9 3 12 3.69 0.00
 9 3 13 -14.09 0.00
 9 3 14 -4.43 0.00
 9 3 15 -5.80 0.00
 9 3 16 -0.38 0.00
 9 3 17 -2.17 0.00
 9 3 18 0.08 0.00
 9 3 19 -3.05 0.00
 9 5 0 -26.84 0.00
 9 5 1 -1.26 0.00
 9 5 2 -6.36 0.00
 9 5 3 -13.64 0.00
 9 5 4 7.34 0.00
 9 5 5 -21.61 0.00
 9 5 6 -1.17 0.00
 9 5 7 -0.26 0.00
 9 5 8 4.00 0.00
 9 5 9 -5.31 0.00
 9 5 10 -1.51 0.00
 9 5 11 7.45 0.00
 9 5 12 -5.12 0.00
 9 5 13 -19.25 0.00
 9 5 14 6.83 0.00
 9 5 15 -15.06 0.00
 9 5 16 8.51 0.00
 9 5 17 1.22 0.00
 9 5 18 3.78 0.00
 9 5 19 -3.66 0.00
 9 7 0 -18.86 0.00
 9 7 1 11.26 0.00
 9 7 2 -19.70 0.00
 9 7 3 7.89 0.00
 9 7 4 -3.22 0.00
 9 7 5 -1.58 0.00
 9 7 6 -0.88 0.00
 9 7 7 1.41 0.00
 9 7 8 -4.24 0.00
 9 7 9 -3.94 0.00
 9 7 10 -6.29 0.00
 9 7 11 4.60 0.00
 9 7 12 -0.73 0.00
 9 7 13 -15.00 0.00
 9 7 14 1.17 0.00
 9 7 15 -6.59 0.00
 9 7 16 2.14 0.00
 9 7 17 5.09 0.00
 9 7 18 4.33 0.00
 9 7 19 -3.92 0.00
 9 9 0 19.15 0.00
 9 9 1 5.63 0.00
 9 9 2 23.31 0.00
 9 9 3 25.47 0.00
 9 9 4 25.61 0.00
 9 9 5 3.89 0.00
 9 9 6 -10.45 0.00
 9 9 7 -5.35 0.00
 9 9 8 -7.38 0.00
 9 9 9 -12.46 0.00
 9 9 10 -1.80 0.00
 9 9 11 -6.38 0.00
 9 9 12 2.94 0.00
 9 9 13 -10.65 0.00
 9 9 14 0.58 0.00
 9 9 15 4.59 0.00
 9 9 16 2.68 0.00
 9 9 17 6.27 0.00
 9 9 18 -0.08 0.00
 9 9 19 -0.55 0.00
 9 11 0 37.09 0.00
 9 11 1 1.21 0.00
 9 11 2 -30.18 0.00
 9 11 3 14.70 0.00
 9 11 4 -5.93 0.00
 9 11 5 9.09 0.00
 9 11 6 -8.71 0.00
 9 11 7 -0.65 0.00
 9 11 8 6.46 0.00
 9 11 9 -7.17 0.00
 9 11 10 -3.42 0.00
 9 11 11 -9.99 0.00
 9 11 12 3.78 0.00
 9 11 13 -9.62 0.00
 9 11 14 -1.19 0.00
 9 11 15 -0.15 0.00
 9 11 16 3.28 0.00
 9 11 17 3.30 0.00
 9 11 18 -0.40 0.00
 9 11 19 -0.62 0.00
 9 13 0 8.71 0.00
 9 13 1 -15.35 0.00
 9 13 2 -9.39 0.00
 9 13 3 22.61 0.00
 9 13 4 -5.94 0.00
 9 13 5 19.42 0.00
 9 13 6 -7.15 0.00
 9 13 7 2.11 0.00
 9 13 8 -6.49 0.00
 9 13 9 4.02 0.00
 9 13 10 -5.41 0.00
 9 13 11 17.98 0.00
 9 13 12 1.43 0.00
 9 13 13 0.33 0.00
 9 13 14 -7.01 0.00
 9 13 15 -1.81 0.00
 9 13 16 6.21 0.00
 9 13 17 -7.00 0.00
 9 13 18 4.27 0.00
 9 15 0 23.97 0.00
 9 15 1 -2.12 0.00
 9 15 2 -14.94 0.00
 9 15 3 8.81 0.00
 9 15 4 -1.94 0.00
 9 15 5 12.17 0.00
 9 15 6 1.16 0.00
 9 15 7 -11.61 0.00
 9 15 8 -5.70 0.00
 9 15 9 -4.30 0.00
 9 15 10 -1.75 0.00
 9 15 11 8.49 0.00
 9 15 12 7.95 0.00
 9 15 13 -4.63 0.00
 9 15 14 0.76 0.00
 9 15 15 -1.63 0.00
 9 15 16 0.33 0.00
 9 15 17 -3.18 0.00
 9 15 18 1.71 0.00
 9 17 0 20.05 0.00
 9 17 1 -19.48 0.00
 9 17 2 7.80 0.00
 9 17 3 -8.84 0.00
 9 17 4 -15.26 0.00
 9 17 5 -9.33 0.00
 9 17 6 -1.18 0.00
 9 17 7 -0.26 0.00
 9 17 8 -3.47 0.00
 9 17 9 -3.82 0.00
 9 17 10 9.37 0.00
 9 17 11 0.72 0.00
 9 17 12 5.89 0.00
 9 17 13 -2.37 0.00
 9 17 14 -3.79 0.00
 9 17 15 4.29 0.00
 9 17 16 -2.45 0.00
 9 17 17 1.25 0.00
 9 17 18 8.79 0.00
 9 19 0 -32.77 0.00
 9 19 1 -14.40 0.00
 9 19 2 -6.94 0.00
 9 19 3 -8.81 0.00
 9 19 4 -10.55 0.00
 9 19 5 -8.28 0.00
 9 19 6 -9.43 0.00
 9 19 7 -0.14 0.00
 9 19 8 -3.95 0.00
 9 19 9 3.97 0.00
 9 19 10 0.87 0.00
 9 19 11 -11.83 0.00
 9 19 12 0.93 0.00
 9 19 13 1.25 0.00
 9 19 14 2.53 0.00
 9 19 15 5.51 0.00
 9 19 16 -4.39 0.00
 9 19 17 -3.07 0.00
 9 19 18 -5.50 0.00
 9 21 0 -0.23 0.00
 9 21 1 5.43 0.00
 9 21 2 0.41 0.00
 9 21 3 7.17 0.00
 9 21 4 5.81 0.00
 9 21 5 0.59 0.00
 9 21 6 11.95 0.00
 9 21 7 9.04 0.00
 9 21 8 1.59 0.00
 9 21 9 -7.27 0.00
 9 21 10 1.16 0.00
 9 21 11 -2.81 0.00
 9 21 12 3.02 0.00
 9 21 13 2.82 0.00
 9 21 14 4.73 0.00
 9 21 15 1.05 0.00
 9 21 16 -0.26 0.00
 9 21 17 -2.64 0.00
 9 23 0 -11.73 0.00
 9 23 1 18.15 0.00
 9 23 2 6.62 0.00
 9 23 3 14.15 0.00
 9 23 4 3.46 0.00
 9 23 5 6.23 0.00
 9 23 6 3.55 0.00
 9 23 7 14.52 0.00
 9 23 8 16.72 0.00
 9 23 9 13.66 0.00
 9 23 10 1.04 0.00
 9 23 11 4.65 0.00
 9 23 12 4.62 0.00
 9 23 13 4.51 0.00
 9 23 14 -0.72 0.00
 9 23 15 -0.16 0.00
 9 23 16 2.51 0.00
 9 23 17 -1.30 0.00
 9 25 0 1.46 0.00
 9 25 1 -6.16 0.00
 9 25 2 -5.03 0.00
 9 25 3 -6.63 0.00
 9 25 4 2.87 0.00
 9 25 5 -10.50 0.00
 9 25 6 -4.79 0.00
 9 25 7 -4.73 0.00
 9 25 8 -5.53 0.00
 9 25 9 -9.24 0.00
 9 25 10 -7.26 0.00
 9 25 11 3.86 0.00
 9 25 12 -0.68 0.00
 9 25 13 1.70 0.00
 9 25 14 1.57 0.00
 9 25 15 1.37 0.00
 9 25 16 0.05 0.00
 9 27 0 -1.44 0.00
 9 27 1 -6.03 0.00
 9 27 2 1.85 0.00
 9 27 3 -1.49 0.00
 9 27 4 8.92 0.00
 9 27 5 -13.50 0.00
 9 27 6 -12.78 0.00
 9 27 7 -11.23 0.00
 9 27 8 2.56 0.00
 9 27 9 -12.25 0.00
 9 27 10 -11.73 0.00
 9 27 11 2.35 0.00
 9 27 12 -5.88 0.00
 9 27 13 -4.67 0.00
 9 27 14 -2.84 0.00
 9 27 15 -3.69 0.00
 9 27 16 -2.79 0.00
 9 29 0 6.61 0.00
 9 29 1 1.33 0.00
 9 29 2 6.05 0.00
 9 29 3 9.28 0.00
 9 29 4 11.33 0.00
 9 29 5 1.02 0.00
 9 29 6 1.09 0.00
 9 29 7 7.08 0.00
 9 29 8 9.51 0.00
 9 29 9 2.38 0.00
 9 29 10 3.09 0.00
 9 29 11 8.24 0.00
 9 29 12 -2.49 0.00
 9 29 13 -3.14 0.00
 9 29 14 2.58 0.00
 9 29 15 1.60 0.00
 9 31 0 -20.18 0.00
 9 31 1 2.15 0.00
 9 31 2 -16.72 0.00
 9 31 3 15.04 0.00
 9 31 4 5.35 0.00
 9 31 5 12.39 0.00
 9 31 6 -1.38 0.00
 9 31 7 11.56 0.00
 9 31 8 5.28 0.00
 9 31 9 6.54 0.00
 9 31 10 4.11 0.00
 9 31 11 10.40 0.00
 9 31 12 -1.28 0.00
 9 31 13 -8.16 0.00
 9 31 14 -1.95 0.00
 9 33 0 -3.43 0.00
 9 33 1 -9.38 0.00
 9 33 2 -2.85 0.00
 9 33 3 0.04 0.00
 9 33 4 -0.42 0.00
 9 33 5 9.70 0.00
 9 33 6 -3.76 0.00
 9 33 7 1.65 0.00
 9 33 8 -2.11 0.00
 9 33 9 -5.80 0.00
 9 33 10 1.22 0.00
 9 33 11 2.21 0.00
 9 33 12 -7.15 0.00
 9 33 13 -2.25 0.00
 9 33 14 0.00 0.00
 9 35 0 -2.75 0.00
 9 35 1 -20.44 0.00
 9 35 2 -2.74 0.00
 9 35 3 -6.29 0.00
 9 35 4 -2.79 0.00
 9 35 5 2.12 0.00
 9 35 6 -0.55 0.00
 9 35 7 0.20 0.00
 9 35 8 3.01 0.00
 9 35 9 -0.79 0.00
 9 35 10 5.90 0.00
 9 35 11 5.39 0.00
 9 35 12 -1.95 0.00
 9 35 13 5.23 0.00
 9 37 0 1.43 0.00
 9 37 1 -9.11 0.00
 9 37 2 -5.53 0.00
 9 37 3 -5.47 0.00
 9 37 4 -3.05 0.00
 9 37 5 10.52 0.00
 9 37 6 -0.38 0.00
 9 37 7 0.16 0.00
 9 37 8 4.98 0.00
 9 37 9 -2.65 0.00
 9 37 10 6.06 0.00
 9 37 11 -1.38 0.00
 9 39 0 4.37 0.00
 9 39 1 1.39 0.00
 9 39 2 -0.65 0.00
 9 39 3 1.42 0.00
 9 39 4 -8.76 0.00
 9 39 5 3.81 0.00
 9 39 6 -0.93 0.00
 9 39 7 0.06 0.00
 9 39 8 -0.77 0.00
 9 39 9 -5.41 0.00
 9 41 0 -7.28 0.00
 9 41 1 -1.30 0.00
 9 41 2 5.22 0.00
 9 41 3 1.10 0.00
 9 41 4 0.24 0.00
 9 41 5 0.85 0.00
 9 41 6 -5.76 0.00
 9 41 7 -3.37 0.00
 9 41 8 3.45 0.00
 9 41 9 -0.39 0.00
 9 43 0 -10.44 0.00
 9 43 1 0.85 0.00
 9 43 2 1.25 0.00
 9 43 3 -0.37 0.00
 9 43 4 -2.04 0.00
 9 43 5 -0.06 0.00
 9 43 6 6.81 0.00
 9 43 7 -0.84 0.00
 9 45 2 8.38 0.00
 9 45 3 -0.83 0.00
 10 0 3 12.92 0.00
 10 0 4 -10.01 0.00
 10 0 5 -5.13 0.00
 10 0 6 -24.60 0.00
 10 0 7 -3.11 0.00
 10 0 8 -4.75 0.00
 10 0 9 -4.57 0.00
 10 0 10 -14.83 0.00
 10 0 11 7.27 0.00
 10 0 12 13.06 0.00
 10 0 13 -4.62 0.00
 10 0 14 2.65 0.00
 10 0 15 -14.20 0.00
 10 0 16 10.26 0.00
 10 0 17 -8.23 0.00
 10 0 18 -10.05 0.00
 10 0 19 -8.77 0.00
 10 2 3 24.60 0.00
 10 2 4 4.28 0.00
 10 2 5 -3.95 0.00
 10 2 6 -15.86 0.00
 10 2 7 -4.84 0.00
 10 2 8 5.47 0.00
 10 2 9 -0.74 0.00
 10 2 10 -3.71 0.00
 10 2 11 0.56 0.00
 10 2 12 7.45 0.00
 10 2 13 -6.46 0.00
 10 2 14 -23.91 0.00
 10 2 15 -3.48 0.00
 10 2 16 3.27 0.00
 10 2 17 2.80 0.00
 10 2 18 -4.67 0.00
 10 2 19 -2.42 0.00
 10 4 3 15.44 0.00
 10 4 4 2.50 0.00
 10 4 5 -11.96 0.00
 10 4 6 0.50 0.00
 10 4 7 3.83 0.00
 10 4 8 11.24 0.00
 10 4 9 2.28 0.00
 10 4 10 4.54 0.00
 10 4 11 -0.25 0.00
 10 4 12 7.57 0.00
 10 4 13 -4.09 0.00
 10 4 14 -21.89 0.00
 10 4 15 -0.42 0.00
 10 4 16 -1.59 0.00
 10 4 17 0.55 0.00
 10 4 18 2.97 0.00
 10 4 19 -2.87 0.00
 10 6 1 2.17 0.00
 10 6 2 7.28 0.00
 10 6 3 11.03 0.00
 10 6 4 1.22 0.00
 10 6 5 2.41 0.00
 10 6 6 6.07 0.00
 10 6 7 -3.14 0.00
 10 6 8 15.02 0.00
 10 6 9 -7.07 0.00
 10 6 10 16.52 0.00
 10 6 11 -2.62 0.00
 10 6 12 18.14 0.00
 10 6 13 -5.19 0.00
 10 6 14 0.40 0.00
 10 6 15 -0.34 0.00
 10 6 16 -3.64 0.00
 10 6 17 -2.50 0.00
 10 6 18 -0.30 0.00
 10 6 19 -2.91 0.00
 10 8 0 -33.36 0.00
 10 8 1 -0.50 0.00
 10 8 2 -13.09 0.00
 10 8 3 -4.52 0.00
 10 8 4 -20.00 0.00
 10 8 5 -9.93 0.00
 10 8 6 3.86 0.00
 10 8 7 -2.86 0.00
 10 8 8 2.71 0.00
 10 8 9 -1.19 0.00
 10 8 10 -12.52 0.00
 10 8 11 -5.40 0.00
 10 8 12 -3.97 0.00
 10 8 13 -1.32 0.00
 10 8 14 8.40 0.00
 10 8 15 -0.99 0.00
 10 8 16 -1.78 0.00
 10 8 17 -0.49 0.00
 10 8 18 6.34 0.00
 10 8 19 -2.09 0.00
 10 10 0 -17.62 0.00
 10 10 1 20.19 0.00
 10 10 2 -3.32 0.00
 10 10 3 -19.61 0.00
 10 10 4 -13.33 0.00
 10 10 5 1.14 0.00
 10 10 6 -6.25 0.00
 10 10 7 -5.35 0.00
 10 10 8 3.21 0.00
 10 10 9 6.08 0.00
 10 10 10 7.96 0.00
 10 10 11 5.90 0.00
 10 10 12 -20.88 0.00
 10 10 13 3.76 0.00
 10 10 14 12.50 0.00
 10 10 15 0.89 0.00
 10 10 16 -1.72 0.00
 10 10 17 -2.06 0.00
 10 10 18 6.12 0.00
 10 12 0 -12.07 0.00
 10 12 1 19.72 0.00
 10 12 2 -6.73 0.00
 10 12 3 -6.04 0.00
 10 12 4 -1.78 0.00
 10 12 5 6.44 0.00
 10 12 6 6.42 0.00
 10 12 7 4.18 0.00
 10 12 8 5.18 0.00
 10 12 9 -2.20 0.00
 10 12 10 -10.29 0.00
 10 12 11 6.19 0.00
 10 12 12 -9.94 0.00
 10 12 13 6.21 0.00
 10 12 14 7.27 0.00
 10 12 15 -0.15 0.00
 10 12 16 -5.63 0.00
 10 12 17 -2.53 0.00
 10 12 18 2.53 0.00
 10 14 0 -3.51 0.00
 10 14 1 1.71 0.00
 10 14 2 8.68 0.00
 10 14 3 -20.26 0.00
 10 14 4 13.00 0.00
 10 14 5 6.54 0.00
 10 14 6 -1.98 0.00
 10 14 7 -12.01 0.00
 10 14 8 -4.14 0.00
 10 14 9 -8.51 0.00
 10 14 10 15.45 0.00
 10 14 11 2.35 0.00
 10 14 12 -2.47 0.00
 10 14 13 2.21 0.00
 10 14 14 1.68 0.00
 10 14 15 -2.62 0.00
 10 14 16 -2.21 0.00
 10 14 17 -7.25 0.00
 10 14 18 -7.86 0.00
 10 16 0 19.16 0.00
 10 16 1 6.32 0.00
 10 16 2 3.39 0.00
 10 16 3 -2.47 0.00
 10 16 4 13.85 0.00
 10 16 5 -8.23 0.00
 10 16 6 -9.47 0.00
 10 16 7 -5.65 0.00
 10 16 8 -6.66 0.00
 10 16 9 -9.90 0.00
 10 16 10 -6.33 0.00
 10 16 11 5.80 0.00
 10 16 12 1.90 0.00
 10 16 13 -4.82 0.00
 10 16 14 -5.50 0.00
 10 16 15 -7.83 0.00
 10 16 16 1.68 0.00
 10 16 17 0.02 0.00
 10 16 18 -5.68 0.00
 10 18 0 -9.98 0.00
 10 18 1 5.56 0.00
 10 18 2 -9.78 0.00
 10 18 3 0.89 0.00
 10 18 4 -9.07 0.00
 10 18 5 2.10 0.00
 10 18 6 -13.24 0.00
 10 18 7 1.50 0.00
 10 18 8 -9.36 0.00
 10 18 9 2.54 0.00
 10 18 10 -5.52 0.00
 10 18 11 -2.69 0.00
 10 18 12 -11.10 0.00
 10 18 13 -3.56 0.00
 10 18 14 -7.46 0.00
 10 18 15 -1.06 0.00
 10 18 16 1.53 0.00
 10 18 17 1.58 0.00
 10 20 0 -7.01 0.00
 10 20 1 -7.22 0.00
 10 20 2 3.82 0.00
 10 20 3 14.33 0.00
 10 20 4 3.34 0.00
 10 20 5 0.35 0.00
 10 20 6 -8.99 0.00
 10 20 7 -0.99 0.00
 10 20 8 -5.11 0.00
 10 20 9 -6.42 0.00
 10 20 10 -8.01 0.00
 10 20 11 -1.62 0.00
 10 20 12 6.28 0.00
 10 20 13 1.70 0.00
 10 20 14 2.50 0.00
 10 20 15 0.57 0.00
 10 20 16 1.91 0.00
 10 20 17 0.33 0.00
 10 22 0 2.00 0.00
 10 22 1 -3.73 0.00
 10 22 2 1.24 0.00
 10 22 3 -4.04 0.00
 10 22 4 -4.47 0.00
 10 22 5 0.72 0.00
 10 22 6 -8.85 0.00
 10 22 7 2.31 0.00
 10 22 8 -21.35 0.00
 10 22 9 0.59 0.00
 10 22 10 -5.91 0.00
 10 22 11 1.33 0.00
 10 22 12 2.80 0.00
 10 22 13 8.66 0.00
 10 22 14 2.80 0.00
 10 22 15 2.22 0.00
 10 22 16 -1.75 0.00
 10 22 17 2.50 0.00
 10 24 0 -6.52 0.00
 10 24 1 3.97 0.00
 10 24 2 15.63 0.00
 10 24 3 6.62 0.00
 10 24 4 6.05 0.00
 10 24 5 -1.49 0.00
 10 24 6 9.86 0.00
 10 24 7 -3.74 0.00
 10 24 8 -2.25 0.00
 10 24 9 -9.77 0.00
 10 24 10 -5.57 0.00
 10 24 11 -0.92 0.00
 10 24 12 -4.17 0.00
 10 24 13 0.92 0.00
 10 24 14 4.48 0.00
 10 24 15 -1.02 0.00
 10 24 16 -2.26 0.00
 10 26 0 14.76 0.00
 10 26 1 -9.19 0.00
 10 26 2 11.62 0.00
 10 26 3 -5.31 0.00
 10 26 4 5.43 0.00
 10 26 5 -2.24 0.00
 10 26 6 13.29 0.00
 10 26 7 -0.01 0.00
 10 26 8 -7.51 0.00
 10 26 9 3.01 0.00
 10 26 10 -7.21 0.00
 10 26 11 -6.23 0.00
 10 26 12 2.01 0.00
 10 26 13 4.88 0.00
 10 26 14 7.40 0.00
 10 26 15 3.08 0.00
 10 28 0 -14.09 0.00
 10 28 1 10.40 0.00
 10 28 2 2.08 0.00
 10 28 3 -0.53 0.00
 10 28 4 -7.32 0.00
 10 28 5 -5.01 0.00
 10 28 6 3.63 0.00
 10 28 7 -3.22 0.00
 10 28 8 0.31 0.00
 10 28 9 6.52 0.00
 10 28 10 0.30 0.00
 10 28 11 0.30 0.00
 10 28 12 -3.77 0.00
 10 28 13 3.59 0.00
 10 28 14 3.74 0.00
 10 28 15 1.09 0.00
 10 30 0 -4.38 0.00
 10 30 1 -5.25 0.00
 10 30 2 -4.19 0.00
 10 30 3 -3.37 0.00
 10 30 4 -9.25 0.00
 10 30 5 2.49 0.00
 10 30 6 8.43 0.00
 10 30 7 -3.80 0.00
 10 30 8 6.29 0.00
 10 30 9 6.42 0.00
 10 30 10 -1.50 0.00
 10 30 11 -7.39 0.00
 10 30 12 0.68 0.00
 10 30 13 2.36 0.00
 10 30 14 -4.60 0.00
 10 32 0 5.23 0.00
 10 32 1 1.89 0.00
 10 32 2 6.85 0.00
 10 32 3 -1.20 0.00
 10 32 4 3.65 0.00
 10 32 5 5.47 0.00
 10 32 6 8.35 0.00
 10 32 7 -0.15 0.00
 10 32 8 10.01 0.00
 10 32 9 6.03 0.00
 10 32 10 -0.48 0.00
 10 32 11 -1.25 0.00
 10 32 12 -4.27 0.00
 10 32 13 1.07 0.00
 10 34 0 7.41 0.00
 10 34 1 0.51 0.00
 10 34 2 6.71 0.00
 10 34 3 3.02 0.00
 10 34 4 9.71 0.00
 10 34 5 12.43 0.00
 10 34 6 8.65 0.00
 10 34 7 -1.07 0.00
 10 34 8 3.55 0.00
 10 34 9 5.32 0.00
 10 34 10 -4.61 0.00
 10 34 11 2.87 0.00
 10 34 12 0.71 0.00
 10 36 0 -2.55 0.00
 10 36 1 1.67 0.00
 10 36 2 1.24 0.00
 10 36 3 2.34 0.00
 10 36 4 9.04 0.00
 10 36 5 -5.52 0.00
 10 36 6 0.24 0.00
 10 36 7 -5.21 0.00
 10 36 8 -0.82 0.00
 10 36 9 -0.52 0.00
 10 36 10 -6.46 0.00
 10 36 11 1.01 0.00
 10 38 0 -4.94 0.00
 10 38 1 -3.52 0.00
 10 38 2 -6.32 0.00
 10 38 3 -12.04 0.00
 10 38 4 0.27 0.00
 10 38 5 2.93 0.00
 10 38 6 -0.29 0.00
 10 38 7 1.15 0.00
 10 38 8 0.61 0.00
 10 38 9 -1.93 0.00
 10 38 10 0.02 0.00
 10 40 0 -4.43 0.00
 10 40 1 3.79 0.00
 10 40 2 -4.62 0.00
 10 40 3 7.17 0.00
 10 40 4 3.43 0.00
 10 40 5 -8.68 0.00
 10 40 6 1.57 0.00
 10 40 7 1.65 0.00
 10 40 8 -4.39 0.00
 10 40 9 -0.99 0.00
 10 42 0 -6.04 0.00
 10 42 1 2.62 0.00
 10 42 2 -2.69 0.00
 10 42 3 3.16 0.00
 10 42 4 7.13 0.00
 10 42 5 -4.65 0.00
 10 42 6 -1.25 0.00
 10 42 7 -4.78 0.00
 10 44 0 10.31 0.00
 10 44 1 -6.32 0.00
 10 44 2 -3.29 0.00
 10 44 3 -0.22 0.00
 10 44 4 -2.78 0.00
 11 1 0 -54.29 0.00
 11 1 1 13.15 0.00
 11 1 2 6.16 0.00
 11 1 3 -19.93 0.00
 11 1 4 25.61 0.00
 11 1 5 -5.27 0.00
 11 1 6 1.24 0.00
 11 1 7 -5.27 0.00
 11 1 8 -2.67 0.00
 11 1 9 -7.30 0.00
 11 1 10 -10.79 0.00
 11 1 11 -3.19 0.00
 11 1 12 -1.59 0.00
 11 1 13 -1.42 0.00
 11 1 14 -9.37 0.00
 11 1 15 -5.55 0.00
 11 1 16 -2.61 0.00
 11 1 17 -6.27 0.00
 11 1 18 6.42 0.00
 11 1 19 1.11 0.00
 11 3 0 -27.92 0.00
 11 3 1 12.46 0.00
 11 3 2 -3.88 0.00
 11 3 3 12.25 0.00
 11 3 4 -3.07 0.00
 11 3 5 6.39 0.00
 11 3 6 -3.24 0.00
 11 3 7 -3.49 0.00
 11 3 8 4.40 0.00
 11 3 9 0.09 0.00
 11 3 10 2.26 0.00
 11 3 11 4.35 0.00
 11 3 12 5.50 0.00
 11 3 13 -5.99 0.00
 11 3 14 -6.41 0.00
 11 3 15 -7.37 0.00
 11 3 16 -5.62 0.00
 11 3 17 0.81 0.00
 11 3 18 0.04 0.00
 11 3 19 7.33 0.00
 11 5 0 9.98 0.00
 11 5 1 0.42 0.00
 11 5 2 38.55 0.00
 11 5 3 20.33 0.00
 11 5 4 6.63 0.00
 11 5 5 4.39 0.00
 11 5 6 -4.31 0.00
 11 5 7 -0.28 0.00
 11 5 8 -5.58 0.00
 11 5 9 -8.27 0.00
 11 5 10 0.19 0.00
 11 5 11 -1.54 0.00
 11 5 12 -1.66 0.00
 11 5 13 11.22 0.00
 11 5 14 -1.19 0.00
 11 5 15 -2.10 0.00
 11 5 16 -4.77 0.00
 11 5 17 4.90 0.00
 11 5 18 -8.08 0.00
 11 7 0 13.66 0.00
 11 7 1 15.18 0.00
 11 7 2 -3.01 0.00
 11 7 3 23.63 0.00
 11 7 4 -8.11 0.00
 11 7 5 6.35 0.00
 11 7 6 -2.46 0.00
 11 7 7 13.45 0.00
 11 7 8 -5.85 0.00
 11 7 9 8.03 0.00
 11 7 10 -5.96 0.00
 11 7 11 -0.79 0.00
 11 7 12 -0.75 0.00
 11 7 13 16.84 0.00
 11 7 14 -3.17 0.00
 11 7 15 4.33 0.00
 11 7 16 -0.46 0.00
 11 7 17 -4.14 0.00
 11 7 18 0.77 0.00
 11 9 0 0.33 0.00
 11 9 1 -16.01 0.00
 11 9 2 10.28 0.00
 11 9 3 -2.30 0.00
 11 9 4 -3.26 0.00
 11 9 5 -12.69 0.00
 11 9 6 -2.26 0.00
 11 9 7 12.99 0.00
 11 9 8 3.21 0.00
 11 9 9 24.99 0.00
 11 9 10 -0.29 0.00
 11 9 11 -15.61 0.00
 11 9 12 3.91 0.00
 11 9 13 8.21 0.00
 11 9 14 -2.35 0.00
 11 9 15 2.58 0.00
 11 9 16 2.64 0.00
 11 9 17 -7.07 0.00
 11 9 18 -0.12 0.00
 11 11 0 28.98 0.00
 11 11 1 -20.98 0.00
 11 11 2 -21.46 0.00
 11 11 3 -28.37 0.00
 11 11 4 -1.02 0.00
 11 11 5 -30.16 0.00
 11 11 6 -1.01 0.00
 11 11 7 -1.64 0.00
 11 11 8 3.77 0.00
 11 11 9 8.75 0.00
 11 11 10 -5.61 0.00
 11 11 11 -32.88 0.00
 11 11 12 8.89 0.00
 11 11 13 -4.38 0.00
 11 11 14 0.97 0.00
 11 11 15 2.02 0.00
 11 11 16 -3.25 0.00
 11 11 17 -2.27 0.00
 11 11 18 -11.98 0.00
 11 13 0 11.40 0.00
 11 13 1 -5.86 0.00
 11 13 2 0.08 0.00
 11 13 3 0.84 0.00
 11 13 4 4.41 0.00
 11 13 5 1.47 0.00
 11 13 6 2.16 0.00
 11 13 7 2.93 0.00
 11 13 8 -10.62 0.00
 11 13 9 21.45 0.00
 11 13 10 -6.69 0.00
 11 13 11 -7.21 0.00
 11 13 12 4.54 0.00
 11 13 13 10.47 0.00
 11 13 14 -5.29 0.00
 11 13 15 2.09 0.00
 11 13 16 -5.95 0.00
 11 13 17 -2.86 0.00
 11 13 18 -10.88 0.00
 11 15 0 0.72 0.00
 11 15 1 2.65 0.00
 11 15 2 -10.96 0.00
 11 15 3 -2.36 0.00
 11 15 4 9.28 0.00
 11 15 5 2.39 0.00
 11 15 6 5.80 0.00
 11 15 7 -12.13 0.00
 11 15 8 -3.82 0.00
 11 15 9 1.31 0.00
 11 15 10 -5.26 0.00
 11 15 11 -4.64 0.00
 11 15 12 1.34 0.00
 11 15 13 5.17 0.00
 11 15 14 1.40 0.00
 11 15 15 -1.05 0.00
 11 15 16 -8.58 0.00
 11 15 17 -5.92 0.00
 11 17 0 18.56 0.00
 11 17 1 10.73 0.00
 11 17 2 -0.01 0.00
 11 17 3 2.76 0.00
 11 17 4 -5.97 0.00
 11 17 5 8.77 0.00
 11 17 6 0.63 0.00
 11 17 7 -4.33 0.00
 11 17 8 -0.34 0.00
 11 17 9 6.70 0.00
 11 17 10 0.46 0.00
 11 17 11 -0.81 0.00
 11 17 12 -4.61 0.00
 11 17 13 -0.09 0.00
 11 17 14 -0.54 0.00
 11 17 15 -6.68 0.00
 11 17 16 -1.93 0.00
 11 17 17 0.20 0.00
 11 19 0 -20.74 0.00
 11 19 1 0.67 0.00
 11 19 2 4.72 0.00
 11 19 3 6.83 0.00
 11 19 4 11.68 0.00
 11 19 5 10.26 0.00
 11 19 6 8.42 0.00
 11 19 7 -4.61 0.00
 11 19 8 6.17 0.00
 11 19 9 0.96 0.00
 11 19 10 -4.43 0.00
 11 19 11 -1.56 0.00
 11 19 12 -4.62 0.00
 11 19 13 0.49 0.00
 11 19 14 7.44 0.00
 11 19 15 -4.99 0.00
 11 19 16 3.43 0.00
 11 19 17 -0.43 0.00
 11 21 0 28.92 0.00
 11 21 1 -3.78 0.00
 11 21 2 9.43 0.00
 11 21 3 -1.47 0.00
 11 21 4 9.00 0.00
 11 21 5 0.73 0.00
 11 21 6 -3.36 0.00
 11 21 7 -20.13 0.00
 11 21 8 -7.09 0.00
 11 21 9 -10.70 0.00
 11 21 10 -4.93 0.00
 11 21 11 4.77 0.00
 11 21 12 -0.67 0.00
 11 21 13 1.69 0.00
 11 21 14 2.99 0.00
 11 21 15 -4.33 0.00
 11 21 16 -0.06 0.00
 11 23 0 -11.33 0.00
 11 23 1 -5.11 0.00
 11 23 2 -0.30 0.00
 11 23 3 -1.42 0.00
 11 23 4 -2.27 0.00
 11 23 5 3.40 0.00
 11 23 6 -1.26 0.00
 11 23 7 -8.46 0.00
 11 23 8 3.54 0.00
 11 23 9 -9.67 0.00
 11 23 10 -1.29 0.00
 11 23 11 -5.19 0.00
 11 23 12 4.14 0.00
 11 23 13 -3.38 0.00
 11 23 14 -4.38 0.00
 11 23 15 -0.76 0.00
 11 23 16 -0.81 0.00
 11 25 0 3.15 0.00
 11 25 1 -0.68 0.00
 11 25 2 0.58 0.00
 11 25 3 -0.61 0.00
 11 25 4 0.99 0.00
 11 25 5 11.22 0.00
 11 25 6 -0.85 0.00
 11 25 7 -4.41 0.00
 11 25 8 1.33 0.00
 11 25 9 -10.13 0.00
 11 25 10 1.96 0.00
 11 25 11 -7.42 0.00
 11 25 12 1.78 0.00
 11 25 13 -0.35 0.00
 11 25 14 -1.68 0.00
 11 25 15 1.26 0.00
 11 27 0 14.15 0.00
 11 27 1 9.25 0.00
 11 27 2 12.61 0.00
 11 27 3 0.28 0.00
 11 27 4 2.33 0.00
 11 27 5 7.51 0.00
 11 27 6 -4.14 0.00
 11 27 7 2.65 0.00
 11 27 8 6.47 0.00
 11 27 9 -13.09 0.00
 11 27 10 -0.14 0.00
 11 27 11 -7.31 0.00
 11 27 12 1.40 0.00
 11 27 13 -2.26 0.00
 11 27 14 0.61 0.00
 11 27 15 5.36 0.00
 11 29 0 5.55 0.00
 11 29 1 3.65 0.00
 11 29 2 3.60 0.00
 11 29 3 -5.83 0.00
 11 29 4 -11.81 0.00
 11 29 5 0.93 0.00
 11 29 6 -6.54 0.00
 11 29 7 5.56 0.00
 11 29 8 2.77 0.00
 11 29 9 -8.98 0.00
 11 29 10 1.23 0.00
 11 29 11 -5.37 0.00
 11 29 12 -0.58 0.00
 11 29 13 3.10 0.00
 11 29 14 6.45 0.00
 11 31 0 1.93 0.00
 11 31 1 -4.62 0.00
 11 31 2 -6.22 0.00
 11 31 3 -10.11 0.00
 11 31 4 -1.26 0.00
 11 31 5 -4.64 0.00
 11 31 6 -0.18 0.00
 11 31 7 10.72 0.00
 11 31 8 -3.14 0.00
 11 31 9 -3.51 0.00
 11 31 10 0.22 0.00
 11 31 11 -6.09 0.00
 11 31 12 0.92 0.00
 11 31 13 -9.94 0.00
 11 33 0 3.45 0.00
 11 33 1 0.78 0.00
 11 33 2 0.76 0.00
 11 33 3 -7.65 0.00
 11 33 4 -3.12 0.00
 11 33 5 -9.34 0.00
 11 33 6 -1.07 0.00
 11 33 7 4.00 0.00
 11 33 8 -4.92 0.00
 11 33 9 -5.11 0.00
 11 33 10 1.03 0.00
 11 33 11 -1.78 0.00
 11 33 12 -1.66 0.00
 11 35 0 -3.97 0.00
 11 35 1 9.10 0.00
 11 35 2 -2.07 0.00
 11 35 3 8.79 0.00
 11 35 4 1.33 0.00
 11 35 5 -6.71 0.00
 11 35 6 -1.86 0.00
 11 35 7 2.59 0.00
 11 35 8 -6.74 0.00
 11 35 9 4.65 0.00
 11 35 10 4.86 0.00
 11 35 11 3.29 0.00
 11 37 0 5.78 0.00
 11 37 1 11.72 0.00
 11 37 2 0.91 0.00
 11 37 3 12.49 0.00
 11 37 4 5.20 0.00
 11 37 5 4.51 0.00
 11 37 6 2.05 0.00
 11 37 7 8.24 0.00
 11 37 8 -0.32 0.00
 11 37 9 5.45 0.00
 11 37 10 3.55 0.00
 11 39 0 4.80 0.00
 11 39 1 -1.11 0.00
 11 39 2 7.46 0.00
 11 39 3 2.81 0.00
 11 39 4 1.24 0.00
 11 39 5 -4.06 0.00
 11 39 6 4.06 0.00
 11 39 7 0.50 0.00
 11 39 8 4.35 0.00
 11 39 9 7.12 0.00
 11 41 0 -7.01 0.00
 11 41 1 -2.25 0.00
 11 41 2 2.22 0.00
 11 41 3 0.24 0.00
 11 41 4 -2.73 0.00
 11 41 5 0.93 0.00
 11 41 6 -2.85 0.00
 11 41 7 1.71 0.00
 11 43 0 -16.66 0.00
 11 43 1 2.31 0.00
 11 43 2 2.45 0.00
 11 43 3 1.52 0.00
 11 43 4 -1.04 0.00
 12 0 0 -14.89 0.00
 12 0 1 9.94 0.00
 12 0 2 -36.82 0.00
 12 0 3 -8.36 0.00
 12 0 4 9.57 0.00
 12 0 5 14.52 0.00
 12 0 6 17.56 0.00
 12 0 7 -3.26 0.00
 12 0 8 10.13 0.00
 12 0 9 -4.24 0.00
 12 0 10 -0.87 0.00
 12 0 11 6.13 0.00
 12 0 12 10.35 0.00
 12 0 13 16.36 0.00
 12 0 14 16.02 0.00
 12 0 15 -6.29 0.00
 12 0 16 -2.73 0.00
 12 0 17 4.85 0.00
 12 0 18 -7.16 0.00
 12 2 0 -30.58 0.00
 12 2 1 14.55 0.00
 12 2 2 -11.40 0.00
 12 2 3 10.32 0.00
 12 2 4 -2.26 0.00
 12 2 5 -1.42 0.00
 12 2 6 2.37 0.00
 12 2 7 6.87 0.00
 12 2 8 10.49 0.00
 12 2 9 2.72 0.00
 12 2 10 0.45 0.00
 12 2 11 -2.06 0.00
 12 2 12 3.38 0.00
 12 2 13 6.03 0.00
 12 2 14 -6.48 0.00
 12 2 15 -0.22 0.00
 12 2 16 -3.39 0.00
 12 2 17 5.88 0.00
 12 2 18 -6.55 0.00
 12 4 0 -28.25 0.00
 12 4 1 19.80 0.00
 12 4 2 -14.95 0.00
 12 4 3 -8.87 0.00
 12 4 4 8.90 0.00
 12 4 5 4.38 0.00
 12 4 6 2.67 0.00
 12 4 7 -9.50 0.00
 12 4 8 -9.45 0.00
 12 4 9 -1.11 0.00
 12 4 10 -13.54 0.00
 12 4 11 -3.40 0.00
 12 4 12 -0.52 0.00
 12 4 13 2.31 0.00
 12 4 14 3.72 0.00
 12 4 15 -9.13 0.00
 12 4 16 1.41 0.00
 12 4 17 -1.74 0.00
 12 4 18 3.54 0.00
 12 6 0 -9.54 0.00
 12 6 1 10.91 0.00
 12 6 2 22.89 0.00
 12 6 3 2.23 0.00
 12 6 4 3.77 0.00
 12 6 5 7.14 0.00
 12 6 6 -2.19 0.00
 12 6 7 -5.01 0.00
 12 6 8 -3.63 0.00
 12 6 9 -1.79 0.00
 12 6 10 -6.12 0.00
 12 6 11 -3.67 0.00
 12 6 12 -0.36 0.00
 12 6 13 -1.83 0.00
 12 6 14 8.54 0.00
 12 6 15 -2.89 0.00
 12 6 16 -3.38 0.00
 12 6 17 -0.38 0.00
 12 6 18 -7.24 0.00
 12 8 0 10.35 0.00
 12 8 1 5.48 0.00
 12 8 2 15.53 0.00
 12 8 3 7.84 0.00
 12 8 4 2.66 0.00
 12 8 5 9.73 0.00
 12 8 6 -2.45 0.00
 12 8 7 -6.07 0.00
 12 8 8 -13.33 0.00
 12 8 9 2.21 0.00
 12 8 10 -25.36 0.00
 12 8 11 -6.67 0.00
 12 8 12 -18.54 0.00
 12 8 13 4.48 0.00
 12 8 14 2.44 0.00
 12 8 15 -4.39 0.00
 12 8 16 -6.85 0.00
 12 8 17 0.00 0.00
 12 8 18 -4.25 0.00
 12 10 0 1.58 0.00
 12 10 1 4.35 0.00
 12 10 2 24.34 0.00
 12 10 3 -6.47 0.00
 12 10 4 -2.11 0.00
 12 10 5 7.85 0.00
 12 10 6 -3.56 0.00
 12 10 7 -2.17 0.00
 12 10 8 9.89 0.00
 12 10 9 3.34 0.00
 12 10 10 15.97 0.00
 12 10 11 -1.77 0.00
 12 10 12 -21.03 0.00
 12 10 13 3.69 0.00
 12 10 14 6.31 0.00
 12 10 15 -0.81 0.00
 12 10 16 -1.74 0.00
 12 10 17 -4.42 0.00
 12 10 18 -3.80 0.00
 12 12 0 -17.97 0.00
 12 12 1 0.10 0.00
 12 12 2 -24.02 0.00
 12 12 3 4.93 0.00
 12 12 4 -6.02 0.00
 12 12 5 6.71 0.00
 12 12 6 -4.38 0.00
 12 12 7 0.67 0.00
 12 12 8 18.01 0.00
 12 12 9 -7.65 0.00
 12 12 10 6.21 0.00
 12 12 11 -5.54 0.00
 12 12 12 6.03 0.00
 12 12 13 1.34 0.00
 12 12 14 7.03 0.00
 12 12 15 -0.46 0.00
 12 12 16 -0.88 0.00
 12 12 17 -4.44 0.00
 12 14 0 -7.71 0.00
 12 14 1 0.48 0.00
 12 14 2 -1.62 0.00
 12 14 3 -8.14 0.00
 12 14 4 -0.36 0.00
 12 14 5 0.99 0.00
 12 14 6 -17.34 0.00
 12 14 7 -7.02 0.00
 12 14 8 -13.06 0.00
 12 14 9 -10.51 0.00
 12 14 10 7.80 0.00
 12 14 11 -3.83 0.00
 12 14 12 1.77 0.00
 12 14 13 1.39 0.00
 12 14 14 0.88 0.00
 12 14 15 2.59 0.00
 12 14 16 -0.33 0.00
 12 14 17 -9.75 0.00
 12 16 0 23.78 0.00
 12 16 1 5.65 0.00
 12 16 2 -4.21 0.00
 12 16 3 4.10 0.00
 12 16 4 10.08 0.00
 12 16 5 1.66 0.00
 12 16 6 -11.88 0.00
 12 16 7 17.96 0.00
 12 16 8 4.38 0.00
 12 16 9 1.43 0.00
 12 16 10 -11.08 0.00
 12 16 11 7.29 0.00
 12 16 12 7.19 0.00
 12 16 13 1.88 0.00
 12 16 14 -4.03 0.00
 12 16 15 2.21 0.00
 12 16 16 0.60 0.00
 12 16 17 -5.40 0.00
 12 18 0 -1.67 0.00
 12 18 1 4.03 0.00
 12 18 2 -10.77 0.00
 12 18 3 -6.69 0.00
 12 18 4 -1.92 0.00
 12 18 5 -5.18 0.00
 12 18 6 6.01 0.00
 12 18 7 10.84 0.00
 12 18 8 6.48 0.00
 12 18 9 3.36 0.00
 12 18 10 -0.56 0.00
 12 18 11 0.51 0.00
 12 18 12 -3.18 0.00
 12 18 13 3.24 0.00
 12 18 14 -1.22 0.00
 12 18 15 6.07 0.00
 12 18 16 -0.06 0.00
 12 20 0 0.80 0.00
 12 20 1 8.17 0.00
 12 20 2 -1.09 0.00
 12 20 3 7.10 0.00
 12 20 4 6.34 0.00
 12 20 5 -8.34 0.00
 12 20 6 7.28 0.00
 12 20 7 -3.32 0.00
 12 20 8 11.46 0.00
 12 20 9 -10.70 0.00
 12 20 10 -2.41 0.00
 12 20 11 -0.01 0.00
 12 20 12 2.56 0.00
 12 20 13 4.26 0.00
 12 20 14 0.81 0.00
 12 20 15 6.30 0.00
 12 20 16 -1.82 0.00
 12 22 0 2.11 0.00
 12 22 1 4.49 0.00
 12 22 2 -4.61 0.00
 12 22 3 -3.76 0.00
 12 22 4 4.25 0.00
 12 22 5 -6.17 0.00
 12 22 6 7.22 0.00
 12 22 7 5.59 0.00
 12 22 8 -5.57 0.00
 12 22 9 1.56 0.00
 12 22 10 6.15 0.00
 12 22 11 2.38 0.00
 12 22 12 -2.45 0.00
 12 22 13 0.54 0.00
 12 22 14 -1.60 0.00
 12 22 15 1.29 0.00
 12 22 16 -10.51 0.00
 12 24 0 -16.41 0.00
 12 24 1 13.62 0.00
 12 24 2 -7.60 0.00
 12 24 3 14.00 0.00
 12 24 4 -0.66 0.00
 12 24 5 2.15 0.00
 12 24 6 5.19 0.00
 12 24 7 7.91 0.00
 12 24 8 1.22 0.00
 12 24 9 1.63 0.00
 12 24 10 6.45 0.00
 12 24 11 3.79 0.00
 12 24 12 -8.57 0.00
 12 24 13 -5.38 0.00
 12 24 14 4.74 0.00
 12 24 15 -1.88 0.00
 12 26 0 5.35 0.00
 12 26 1 1.31 0.00
 12 26 2 -8.67 0.00
 12 26 3 13.29 0.00
 12 26 4 0.80 0.00
 12 26 5 1.85 0.00
 12 26 6 2.70 0.00
 12 26 7 6.76 0.00
 12 26 8 -12.38 0.00
 12 26 9 4.65 0.00
 12 26 10 3.26 0.00
 12 26 11 -3.94 0.00
 12 26 12 -0.63 0.00
 12 26 13 -0.87 0.00
 12 26 14 3.56 0.00
 12 28 0 11.45 0.00
 12 28 1 21.37 0.00
 12 28 2 8.40 0.00
 12 28 3 14.63 0.00
 12 28 4 7.89 0.00
 12 28 5 -4.32 0.00
 12 28 6 0.48 0.00
 12 28 7 -0.98 0.00
 12 28 8 -13.42 0.00
 12 28 9 4.05 0.00
 12 28 10 -1.33 0.00
 12 28 11 0.43 0.00
 12 28 12 -10.04 0.00
 12 28 13 -0.80 0.00
 12 28 14 -2.18 0.00
 12 30 0 4.59 0.00
 12 30 1 -6.50 0.00
 12 30 2 -0.17 0.00
 12 30 3 -2.23 0.00
 12 30 4 1.47 0.00
 12 30 5 0.54 0.00
 12 30 7 -3.46 0.00
 12 30 8 -0.57 0.00
 12 30 9 3.22 0.00
 12 30 10 -4.00 0.00
 12 30 11 -5.79 0.00
 12 30 12 -1.82 0.00
 12 30 13 1.48 0.00
 12 32 0 -4.70 0.00
 12 32 1 -6.94 0.00
 12 32 2 -8.20 0.00
 12 32 3 -7.92 0.00
 12 32 4 -5.19 0.00
 12 32 5 -2.43 0.00
 12 32 6 -1.37 0.00
 12 32 7 -3.06 0.00
 12 32 8 -2.52 0.00
 12 32 9 0.04 0.00
 12 32 10 -8.85 0.00
 12 32 11 1.68 0.00
 12 32 12 3.23 0.00
 12 34 0 -9.20 0.00
 12 34 1 2.14 0.00
 12 34 2 -5.86 0.00
 12 34 3 -0.07 0.00
 12 34 4 -10.51 0.00
 12 34 5 10.78 0.00
 12 34 6 -2.61 0.00
 12 34 7 -2.16 0.00
 12 34 8 2.42 0.00
 12 34 9 -2.46 0.00
 12 34 10 -9.71 0.00
 12 34 11 -4.33 0.00
 12 36 0 -0.46 0.00
 12 36 1 1.39 0.00
 12 36 2 2.10 0.00
 12 36 3 3.75 0.00
 12 36 4 -0.64 0.00
 12 36 5 -4.79 0.00
 12 36 6 -4.59 0.00
 12 36 7 -1.65 0.00
 12 36 8 6.32 0.00
 12 36 9 1.41 0.00
 12 36 10 -11.37 0.00
 12 38 0 -1.20 0.00
 12 38 1 -5.62 0.00
 12 38 2 1.94 0.00
 12 38 3 -11.52 0.00
 12 38 4 -5.32 0.00
 12 38 5 3.64 0.00
 12 38 6 -0.51 0.00
 12 38 7 5.65 0.00
 12 38 8 15.01 0.00
 12 38 9 1.80 0.00
 12 40 0 9.24 0.00
 12 40 1 -1.39 0.00
 12 40 2 -1.84 0.00
 12 40 3 2.59 0.00
 12 40 4 -10.07 0.00
 12 40 5 -7.98 0.00
 12 40 6 -3.05 0.00
 12 40 7 8.44 0.00
 12 42 0 3.07 0.00
 12 42 1 -5.01 0.00
 12 42 2 2.06 0.00
 12 42 3 10.75 0.00
 12 42 4 -5.14 0.00
 12 42 5 9.63 0.00
 13 1 0 2.42 0.00
 13 1 1 6.85 0.00
 13 1 2 -5.87 0.00
 13 1 3 -0.79 0.00
 13 1 4 -5.39 0.00
 13 1 5 -2.49 0.00
 13 1 6 7.89 0.00
 13 1 7 -5.21 0.00
 13 1 8 -7.68 0.00
 13 1 9 4.83 0.00
 13 1 10 3.37 0.00
 13 1 11 -1.19 0.00
 13 1 12 3.02 0.00
 13 1 13 8.29 0.00
 13 1 14 9.59 0.00
 13 1 15 4.51 0.00
 13 1 16 -6.50 0.00
 13 1 17 -2.65 0.00
 13 1 18 7.72 0.00
 13 3 0 19.28 0.00
 13 3 1 1.12 0.00
 13 3 2 -9.68 0.00
 13 3 3 8.81 0.00
 13 3 4 -9.97 0.00
 13 3 5 4.36 0.00
 13 3 6 9.14 0.00
 13 3 7 11.67 0.00
 13 3 8 -4.19 0.00
 13 3 9 11.11 0.00
 13 3 10 5.38 0.00
 13 3 11 4.63 0.00
 13 3 12 0.31 0.00
 13 3 13 2.19 0.00
 13 3 14 9.71 0.00
 13 3 15 -2.48 0.00
 13 3 16 -1.33 0.00
 13 3 17 -10.26 0.00
 13 3 18 12.11 0.00
 13 5 0 35.77 0.00
 13 5 1 -17.80 0.00
 13 5 2 31.93 0.00
 13 5 3 -5.62 0.00
 13 5 4 2.25 0.00
 13 5 5 -2.49 0.00
 13 5 6 1.84 0.00
 13 5 7 -3.59 0.00
 13 5 8 -14.60 0.00
 13 5 9 -12.96 0.00
 13 5 10 7.11 0.00
 13 5 11 -0.99 0.00
 13 5 12 -10.65 0.00
 13 5 13 6.17 0.00
 13 5 14 3.37 0.00
 13 5 15 -1.99 0.00
 13 5 16 -5.41 0.00
 13 5 17 -3.35 0.00
 13 5 18 5.31 0.00
 13 7 0 15.10 0.00
 13 7 1 -12.53 0.00
 13 7 2 -8.44 0.00
 13 7 3 0.19 0.00
 13 7 4 -1.95 0.00
 13 7 5 1.23 0.00
 13 7 6 2.88 0.00
 13 7 7 -2.72 0.00
 13 7 8 -7.55 0.00
 13 7 9 -31.83 0.00
 13 7 10 3.14 0.00
 13 7 11 -11.98 0.00
 13 7 12 -5.85 0.00
 13 7 13 -3.74 0.00
 13 7 14 1.64 0.00
 13 7 15 1.91 0.00
 13 7 16 -4.04 0.00
 13 7 17 -5.44 0.00
 13 9 0 8.54 0.00
 13 9 1 -6.52 0.00
 13 9 2 15.75 0.00
 13 9 3 4.68 0.00
 13 9 4 -3.22 0.00
 13 9 5 10.62 0.00
 13 9 6 5.61 0.00
 13 9 7 -3.36 0.00
 13 9 8 7.76 0.00
 13 9 9 -7.79 0.00
 13 9 10 10.88 0.00
 13 9 11 -3.74 0.00
 13 9 12 -1.12 0.00
 13 9 13 -8.47 0.00
 13 9 14 0.52 0.00
 13 9 15 2.10 0.00
 13 9 16 -2.15 0.00
 13 9 17 5.66 0.00
 13 11 0 24.32 0.00
 13 11 1 5.48 0.00
 13 11 2 3.55 0.00
 13 11 3 16.60 0.00
 13 11 4 7.73 0.00
 13 11 5 13.32 0.00
 13 11 6 0.70 0.00
 13 11 7 -11.02 0.00
 13 11 8 2.22 0.00
 13 11 9 -19.34 0.00
 13 11 10 -1.24 0.00
 13 11 11 -2.29 0.00
 13 11 12 -0.32 0.00
 13 11 13 -15.88 0.00
 13 11 14 5.03 0.00
 13 11 15 1.55 0.00
 13 11 16 0.94 0.00
 13 11 17 2.90 0.00
 13 13 0 19.95 0.00
 13 13 1 -1.27 0.00
 13 13 2 16.96 0.00
 13 13 3 9.88 0.00
 13 13 4 -3.83 0.00
 13 13 5 17.80 0.00
 13 13 6 3.21 0.00
 13 13 7 -8.57 0.00
 13 13 8 -5.69 0.00
 13 13 9 10.61 0.00
 13 13 10 0.15 0.00
 13 13 11 26.62 0.00
 13 13 12 -0.49 0.00
 13 13 13 -0.61 0.00
 13 13 14 -1.70 0.00
 13 13 15 -5.09 0.00
 13 13 16 -2.52 0.00
 13 13 17 2.02 0.00
 13 15 0 -14.69 0.00
 13 15 1 -15.74 0.00
 13 15 2 -2.82 0.00
 13 15 3 -8.08 0.00
 13 15 4 -3.46 0.00
 13 15 5 -9.70 0.00
 13 15 6 8.56 0.00
 13 15 7 -24.31 0.00
 13 15 8 1.67 0.00
 13 15 9 -13.15 0.00
 13 15 10 1.23 0.00
 13 15 11 9.85 0.00
 13 15 12 -0.78 0.00
 13 15 13 -4.59 0.00
 13 15 14 5.68 0.00
 13 15 15 6.11 0.00
 13 15 16 -1.96 0.00
 13 17 0 16.41 0.00
 13 17 1 0.73 0.00
 13 17 2 3.93 0.00
 13 17 3 -17.82 0.00
 13 17 4 -13.93 0.00
 13 17 5 -12.46 0.00
 13 17 6 6.63 0.00
 13 17 7 -5.42 0.00
 13 17 8 2.42 0.00
 13 17 9 -2.12 0.00
 13 17 10 1.82 0.00
 13 17 11 -1.40 0.00
 13 17 12 2.52 0.00
 13 17 13 -7.42 0.00
 13 17 14 3.62 0.00
 13 17 15 5.36 0.00
 13 17 16 0.92 0.00
 13 19 0 -18.07 0.00
 13 19 1 0.39 0.00
 13 19 2 3.52 0.00
 13 19 3 -2.19 0.00
 13 19 4 -5.49 0.00
 13 19 5 -2.28 0.00
 13 19 6 7.03 0.00
 13 19 7 19.01 0.00
 13 19 8 1.89 0.00
 13 19 9 3.66 0.00
 13 19 10 -0.17 0.00
 13 19 11 -3.81 0.00
 13 19 12 2.14 0.00
 13 19 13 -5.15 0.00
 13 19 14 5.94 0.00
 13 19 15 -1.12 0.00
 13 19 16 1.73 0.00
 13 21 0 30.17 0.00
 13 21 1 10.88 0.00
 13 21 2 12.75 0.00
 13 21 3 0.66 0.00
 13 21 4 -7.83 0.00
 13 21 5 -5.20 0.00
 13 21 6 -7.86 0.00
 13 21 7 5.90 0.00
 13 21 8 -1.72 0.00
 13 21 9 2.32 0.00
 13 21 10 -2.85 0.00
 13 21 11 2.27 0.00
 13 21 12 1.76 0.00
 13 21 13 0.88 0.00
 13 21 14 -0.84 0.00
 13 21 15 -1.14 0.00
 13 23 0 1.96 0.00
 13 23 1 -4.29 0.00
 13 23 2 5.98 0.00
 13 23 3 -6.69 0.00
 13 23 4 -11.31 0.00
 13 23 5 -7.86 0.00
 13 23 6 2.95 0.00
 13 23 7 6.50 0.00
 13 23 8 4.32 0.00
 13 23 9 0.05 0.00
 13 23 10 0.08 0.00
 13 23 11 -0.22 0.00
 13 23 12 3.68 0.00
 13 23 13 0.53 0.00
 13 23 14 0.89 0.00
 13 23 15 1.01 0.00
 13 25 0 -10.15 0.00
 13 25 1 -6.07 0.00
 13 25 2 5.55 0.00
 13 25 3 0.16 0.00
 13 25 4 -5.40 0.00
 13 25 5 0.93 0.00
 13 25 6 -1.54 0.00
 13 25 7 -0.24 0.00
 13 25 8 2.79 0.00
 13 25 9 8.01 0.00
 13 25 10 -0.77 0.00
 13 25 11 0.68 0.00
 13 25 12 1.95 0.00
 13 25 13 -0.03 0.00
 13 25 14 6.69 0.00
 13 27 0 0.59 0.00
 13 27 1 -0.61 0.00
 13 27 2 9.34 0.00
 13 27 3 -2.22 0.00
 13 27 4 2.47 0.00
 13 27 5 3.43 0.00
 13 27 6 -0.72 0.00
 13 27 7 4.06 0.00
 13 27 8 1.79 0.00
 13 27 9 7.86 0.00
 13 27 10 -0.75 0.00
 13 27 11 9.62 0.00
 13 27 12 -0.97 0.00
 13 27 13 -3.98 0.00
 13 27 14 4.01 0.00
 13 29 0 -14.79 0.00
 13 29 1 6.32 0.00
 13 29 2 2.38 0.00
 13 29 3 7.57 0.00
 13 29 4 -2.92 0.00
 13 29 5 5.51 0.00
 13 29 6 -4.30 0.00
 13 29 7 -5.35 0.00
 13 29 8 -1.61 0.00
 13 29 9 0.44 0.00
 13 29 10 0.50 0.00
 13 29 11 4.76 0.00
 13 29 12 -5.76 0.00
 13 29 13 -2.36 0.00
 13 31 0 -5.39 0.00
 13 31 1 0.05 0.00
 13 31 2 -8.20 0.00
 13 31 3 1.21 0.00
 13 31 4 8.30 0.00
 13 31 5 8.85 0.00
 13 31 6 3.72 0.00
 13 31 7 3.20 0.00
 13 31 8 -1.59 0.00
 13 31 9 -5.08 0.00
 13 31 10 4.70 0.00
 13 31 11 -5.10 0.00
 13 31 12 2.18 0.00
 13 33 0 -0.55 0.00
 13 33 1 -0.48 0.00
 13 33 2 -2.97 0.00
 13 33 3 1.90 0.00
 13 33 4 8.41 0.00
 13 33 5 7.25 0.00
 13 33 6 6.06 0.00
 13 33 7 6.75 0.00
 13 33 8 1.92 0.00
 13 33 9 1.39 0.00
 13 33 10 4.53 0.00
 13 33 11 5.31 0.00
 13 35 0 4.14 0.00
 13 35 1 -6.95 0.00
 13 35 2 1.25 0.00
 13 35 3 -4.39 0.00
 13 35 4 14.47 0.00
 13 35 5 1.69 0.00
 13 35 6 5.30 0.00
 13 35 7 -0.89 0.00
 13 35 8 -1.10 0.00
 13 35 9 -5.89 0.00
 13 35 10 -2.78 0.00
 13 37 0 4.48 0.00
 13 37 1 -2.55 0.00
 13 37 2 -9.21 0.00
 13 37 3 -3.29 0.00
 13 37 4 4.40 0.00
 13 37 5 -1.30 0.00
 13 37 6 2.30 0.00
 13 37 7 0.51 0.00
 13 37 8 2.21 0.00
 13 39 0 -0.43 0.00
 13 39 1 3.21 0.00
 13 39 2 -5.07 0.00
 13 39 3 -12.09 0.00
 13 39 4 -7.73 0.00
 13 39 5 -4.68 0.00
 13 39 6 -1.79 0.00
 13 39 7 6.20 0.00
 13 41 0 -2.24 0.00
 13 41 1 -0.33 0.00
 13 41 2 -3.71 0.00
 13 41 3 -16.29 0.00
 13 41 4 -0.14 0.00
 14 0 0 36.25 0.00
 14 0 1 -11.52 0.00
 14 0 2 3.54 0.00
 14 0 3 14.51 0.00
 14 0 4 13.97 0.00
 14 0 5 26.30 0.00
 14 0 6 -6.87 0.00
 14 0 7 14.15 0.00
 14 0 8 1.06 0.00
 14 0 9 -13.70 0.00
 14 0 10 1.73 0.00
 14 0 11 6.12 0.00
 14 0 12 7.98 0.00
 14 0 13 -11.47 0.00
 14 0 14 -1.57 0.00
 14 0 15 -10.97 0.00
 14 0 16 5.99 0.00
 14 0 17 -6.62 0.00
 14 2 0 17.91 0.00
 14 2 1 -8.20 0.00
 14 2 2 6.34 0.00
 14 2 3 13.97 0.00
 14 2 4 -7.36 0.00
 14 2 5 -5.28 0.00
 14 2 6 -23.16 0.00
 14 2 7 10.54 0.00
 14 2 8 -2.54 0.00
 14 2 9 -10.31 0.00
 14 2 10 -2.40 0.00
 14 2 11 -1.69 0.00
 14 2 12 6.14 0.00
 14 2 13 -3.97 0.00
 14 2 14 -13.33 0.00
 14 2 15 5.87 0.00
 14 2 16 4.39 0.00
 14 2 17 -1.63 0.00
 14 4 0 13.59 0.00
 14 4 1 -7.21 0.00
 14 4 2 0.00 0.00
 14 4 3 -16.87 0.00
 14 4 4 4.33 0.00
 14 4 5 -15.48 0.00
 14 4 6 -10.45 0.00
 14 4 7 -11.72 0.00
 14 4 8 -21.55 0.00
 14 4 9 -8.65 0.00
 14 4 10 -11.36 0.00
 14 4 11 9.65 0.00
 14 4 12 7.50 0.00
 14 4 13 -3.48 0.00
 14 4 14 0.15 0.00
 14 4 15 2.50 0.00
 14 4 16 3.33 0.00
 14 4 17 -3.54 0.00
 14 6 0 -13.38 0.00
 14 6 1 26.18 0.00
 14 6 2 -1.60 0.00
 14 6 3 3.03 0.00
 14 6 4 -1.29 0.00
 14 6 5 -6.28 0.00
 14 6 6 10.72 0.00
 14 6 7 2.32 0.00
 14 6 8 4.48 0.00
 14 6 9 5.28 0.00
 14 6 10 7.52 0.00
 14 6 11 8.06 0.00
 14 6 12 15.96 0.00
 14 6 13 -1.75 0.00
 14 6 14 5.40 0.00
 14 6 15 2.57 0.00
 14 6 16 -5.70 0.00
 14 6 17 -6.19 0.00
 14 8 0 -6.08 0.00
 14 8 1 29.25 0.00
 14 8 2 -9.30 0.00
 14 8 3 9.52 0.00
 14 8 4 11.18 0.00
 14 8 5 -0.90 0.00
 14 8 6 18.51 0.00
 14 8 7 4.35 0.00
 14 8 8 -15.81 0.00
 14 8 9 10.79 0.00
 14 8 10 -8.63 0.00
 14 8 11 4.68 0.00
 14 8 12 -1.05 0.00
 14 8 13 -0.30 0.00
 14 8 14 2.86 0.00
 14 8 15 1.14 0.00
 14 8 16 -1.76 0.00
 14 8 17 1.99 0.00
 14 10 0 -8.30 0.00
 14 10 1 18.77 0.00
 14 10 2 -0.86 0.00
 14 10 3 -13.74 0.00
 14 10 4 -0.33 0.00
 14 10 5 -7.24 0.00
 14 10 6 8.29 0.00
 14 10 7 0.81 0.00
 14 10 8 -18.96 0.00
 14 10 9 8.62 0.00
 14 10 10 0.27 0.00
 14 10 11 0.04 0.00
 14 10 12 -17.05 0.00
 14 10 13 1.34 0.00
 14 10 14 2.09 0.00
 14 10 15 -1.27 0.00
 14 10 16 -3.07 0.00
 14 10 17 -0.47 0.00
 14 12 0 -6.01 0.00
 14 12 1 4.36 0.00
 14 12 2 -17.49 0.00
 14 12 3 -3.01 0.00
 14 12 4 14.40 0.00
 14 12 5 -12.00 0.00
 14 12 6 4.95 0.00
 14 12 7 -4.48 0.00
 14 12 8 -19.04 0.00
 14 12 9 3.73 0.00
 14 12 10 -4.94 0.00
 14 12 11 1.08 0.00
 14 12 12 -0.53 0.00
 14 12 13 -2.13 0.00
 14 12 14 -2.24 0.00
 14 12 15 -3.45 0.00
 14 12 16 -5.49 0.00
 14 14 0 3.20 0.00
 14 14 1 6.64 0.00
 14 14 2 1.42 0.00
 14 14 3 -2.01 0.00
 14 14 4 16.88 0.00
 14 14 5 3.75 0.00
 14 14 6 6.62 0.00
 14 14 7 -0.41 0.00
 14 14 8 -24.43 0.00
 14 14 9 2.94 0.00
 14 14 10 2.15 0.00
 14 14 11 -0.49 0.00
 14 14 12 -5.81 0.00
 14 14 13 2.68 0.00
 14 14 14 -5.97 0.00
 14 14 15 -2.92 0.00
 14 14 16 -0.84 0.00
 14 16 0 2.78 0.00
 14 16 1 3.83 0.00
 14 16 2 -12.25 0.00
 14 16 3 4.97 0.00
 14 16 4 4.60 0.00
 14 16 5 4.56 0.00
 14 16 6 -1.11 0.00
 14 16 7 5.56 0.00
 14 16 8 4.32 0.00
 14 16 9 -2.67 0.00
 14 16 10 5.34 0.00
 14 16 11 -0.26 0.00
 14 16 12 5.52 0.00
 14 16 13 -0.37 0.00
 14 16 14 -12.70 0.00
 14 16 15 -0.72 0.00
 14 16 16 1.94 0.00
 14 18 0 -8.98 0.00
 14 18 1 -13.96 0.00
 14 18 2 -6.87 0.00
 14 18 3 -5.16 0.00
 14 18 4 -10.13 0.00
 14 18 5 4.53 0.00
 14 18 6 1.18 0.00
 14 18 7 1.38 0.00
 14 18 8 -2.42 0.00
 14 18 9 -1.43 0.00
 14 18 10 0.09 0.00
 14 18 11 -6.03 0.00
 14 18 12 -4.37 0.00
 14 18 13 0.59 0.00
 14 18 14 -8.05 0.00
 14 18 15 2.71 0.00
 14 20 0 4.44 0.00
 14 20 1 5.07 0.00
 14 20 2 10.80 0.00
 14 20 3 2.54 0.00
 14 20 4 -13.94 0.00
 14 20 5 3.62 0.00
 14 20 6 -6.37 0.00
 14 20 7 -1.26 0.00
 14 20 8 -1.17 0.00
 14 20 9 0.74 0.00
 14 20 10 1.99 0.00
 14 20 11 2.50 0.00
 14 20 12 7.94 0.00
 14 20 13 3.87 0.00
 14 20 14 -5.67 0.00
 14 20 15 5.64 0.00
 14 22 0 13.11 0.00
 14 22 1 5.89 0.00
 14 22 2 19.49 0.00
 14 22 3 -3.94 0.00
 14 22 4 -2.38 0.00
 14 22 5 -4.78 0.00
 14 22 6 -5.40 0.00
 14 22 7 0.92 0.00
 14 22 8 -8.67 0.00
 14 22 9 5.05 0.00
 14 22 10 0.38 0.00
 14 22 11 4.98 0.00
 14 22 12 4.59 0.00
 14 22 13 0.15 0.00
 14 22 14 -2.83 0.00
 14 24 0 -0.10 0.00
 14 24 1 8.07 0.00
 14 24 2 12.34 0.00
 14 24 3 -4.40 0.00
 14 24 4 -6.18 0.00
 14 24 5 -2.38 0.00
 14 24 6 2.36 0.00
 14 24 7 2.16 0.00
 14 24 8 4.37 0.00
 14 24 9 -2.00 0.00
 14 24 10 -1.95 0.00
 14 24 11 0.32 0.00
 14 24 12 -6.15 0.00
 14 24 13 -3.24 0.00
 14 24 14 2.50 0.00
 14 26 0 -2.69 0.00
 14 26 1 -11.85 0.00
 14 26 2 -5.57 0.00
 14 26 3 -3.39 0.00
 14 26 4 -7.18 0.00
 14 26 5 -3.67 0.00
 14 26 6 1.67 0.00
 14 26 7 -2.75 0.00
 14 26 8 10.36 0.00
 14 26 9 -4.53 0.00
 14 26 10 4.09 0.00
 14 26 11 -0.25 0.00
 14 26 12 2.07 0.00
 14 26 13 -0.89 0.00
 14 28 0 0.68 0.00
 14 28 1 -4.89 0.00
 14 28 2 -1.36 0.00
 14 28 3 -7.63 0.00
 14 28 4 -4.24 0.00
 14 28 5 -6.03 0.00
 14 28 6 -2.74 0.00
 14 28 7 -1.37 0.00
 14 28 8 1.45 0.00
 14 28 9 -0.26 0.00
 14 28 10 7.12 0.00
 14 28 11 3.08 0.00
 14 28 12 -2.25 0.00
 14 30 0 1.87 0.00
 14 30 1 -11.96 0.00
 14 30 2 -0.77 0.00
 14 30 3 -5.96 0.00
 14 30 4 -5.31 0.00
 14 30 5 1.23 0.00
 14 30 6 0.90 0.00
 14 30 7 -8.10 0.00
 14 30 8 5.54 0.00
 14 30 9 -2.70 0.00
 14 30 10 2.77 0.00
 14 30 11 -2.27 0.00
 14 30 12 -3.46 0.00
 14 32 0 9.58 0.00
 14 32 1 9.90 0.00
 14 32 2 -0.28 0.00
 14 32 3 6.37 0.00
 14 32 4 1.40 0.00
 14 32 5 4.12 0.00
 14 32 6 -2.24 0.00
 14 32 7 -2.79 0.00
 14 32 8 -6.96 0.00
 14 32 9 -3.29 0.00
 14 32 10 -4.19 0.00
 14 34 0 0.51 0.00
 14 34 1 -2.00 0.00
 14 34 2 3.77 0.00
 14 34 3 3.92 0.00
 14 34 4 -1.36 0.00
 14 34 5 13.49 0.00
 14 34 6 2.94 0.00
 14 34 7 0.27 0.00
 14 34 8 4.81 0.00
 14 34 9 -2.43 0.00
 14 36 0 2.69 0.00
 14 36 1 -2.93 0.00
 14 36 2 0.45 0.00
 14 36 3 6.86 0.00
 14 36 4 2.90 0.00
 14 36 5 -0.06 0.00
 14 36 6 1.02 0.00
 14 36 7 -1.75 0.00
 14 36 8 0.02 0.00
 14 38 0 -2.92 0.00
 14 38 1 -3.64 0.00
 14 38 2 0.09 0.00
 14 38 3 -4.81 0.00
 14 38 4 0.93 0.00
 14 38 5 4.44 0.00
 14 38 6 9.77 0.00
 14 40 0 5.76 0.00
 14 40 1 11.79 0.00
 14 40 2 -10.29 0.00
 14 40 3 2.49 0.00
 14 40 4 -8.29 0.00
 15 1 0 -2.24 0.00
 15 1 1 -13.39 0.00
 15 1 2 13.46 0.00
 15 1 3 -2.43 0.00
 15 1 4 13.14 0.00
 15 1 5 9.79 0.00
 15 1 6 -2.05 0.00
 15 1 7 -11.02 0.00
 15 1 8 0.86 0.00
 15 1 9 -12.50 0.00
 15 1 10 -8.59 0.00
 15 1 11 10.82 0.00
 15 1 12 1.01 0.00
 15 1 13 -3.05 0.00
 15 1 14 -6.63 0.00
 15 1 15 2.87 0.00
 15 1 16 -5.11 0.00
 15 3 0 -0.61 0.00
 15 3 1 -9.56 0.00
 15 3 2 -6.94 0.00
 15 3 3 -0.66 0.00
 15 3 4 -6.23 0.00
 15 3 5 -1.87 0.00
 15 3 6 -3.34 0.00
 15 3 7 0.16 0.00
 15 3 8 8.28 0.00
 15 3 9 -8.10 0.00
 15 3 10 -5.83 0.00
 15 3 11 4.98 0.00
 15 3 12 1.98 0.00
 15 3 13 -7.20 0.00
 15 3 14 -5.89 0.00
 15 3 15 -4.58 0.00
 15 3 16 -4.61 0.00
 15 5 0 -4.76 0.00
 15 5 1 5.55 0.00
 15 5 2 7.20 0.00
 15 5 3 4.97 0.00
 15 5 4 -5.10 0.00
 15 5 5 3.59 0.00
 15 5 6 -8.50 0.00
 15 5 7 -13.50 0.00
 15 5 8 0.79 0.00
 15 5 9 -11.15 0.00
 15 5 10 1.68 0.00
 15 5 11 9.84 0.00
 15 5 12 0.02 0.00
 15 5 13 5.08 0.00
 15 5 14 -6.08 0.00
 15 5 15 1.33 0.00
 15 5 16 -5.77 0.00
 15 7 0 22.21 0.00
 15 7 1 14.97 0.00
 15 7 2 5.32 0.00
 15 7 3 3.24 0.00
 15 7 4 1.66 0.00
 15 7 5 -9.32 0.00
 15 7 6 0.10 0.00
 15 7 7 4.63 0.00
 15 7 8 7.49 0.00
 15 7 9 -12.47 0.00
 15 7 10 -5.85 0.00
 15 7 11 -5.29 0.00
 15 7 12 3.18 0.00
 15 7 13 -1.33 0.00
 15 7 14 -2.72 0.00
 15 7 15 -4.66 0.00
 15 7 16 0.92 0.00
 15 9 0 4.98 0.00
 15 9 1 5.22 0.00
 15 9 2 12.24 0.00
 15 9 3 -10.92 0.00
 15 9 4 -2.65 0.00
 15 9 5 -2.51 0.00
 15 9 6 -3.78 0.00
 15 9 7 1.37 0.00
 15 9 8 5.80 0.00
 15 9 9 10.69 0.00
 15 9 10 -3.51 0.00
 15 9 11 2.04 0.00
 15 9 12 2.01 0.00
 15 9 13 8.25 0.00
 15 9 14 -7.07 0.00
 15 9 15 -1.57 0.00
 15 9 16 -1.08 0.00
 15 11 0 -6.00 0.00
 15 11 1 0.08 0.00
 15 11 2 -9.35 0.00
 15 11 3 -12.93 0.00
 15 11 4 2.15 0.00
 15 11 5 -2.67 0.00
 15 11 6 -5.16 0.00
 15 11 7 1.34 0.00
 15 11 8 9.79 0.00
 15 11 9 -10.15 0.00
 15 11 10 -4.50 0.00
 15 11 11 -11.17 0.00
 15 11 12 1.72 0.00
 15 11 13 8.34 0.00
 15 11 14 0.63 0.00
 15 11 15 6.00 0.00
 15 11 16 8.91 0.00
 15 13 0 -17.70 0.00
 15 13 1 2.82 0.00
 15 13 2 -8.31 0.00
 15 13 3 -11.63 0.00
 15 13 4 -9.78 0.00
 15 13 5 19.01 0.00
 15 13 6 -8.97 0.00
 15 13 7 3.44 0.00
 15 13 8 3.34 0.00
 15 13 9 4.42 0.00
 15 13 10 4.03 0.00
 15 13 11 -2.09 0.00
 15 13 12 5.73 0.00
 15 13 13 5.25 0.00
 15 13 14 -4.97 0.00
 15 13 15 -16.25 0.00
 15 15 0 -22.87 0.00
 15 15 1 8.42 0.00
 15 15 2 -11.79 0.00
 15 15 3 3.22 0.00
 15 15 4 -1.59 0.00
 15 15 5 13.04 0.00
 15 15 6 -6.01 0.00
 15 15 7 -3.68 0.00
 15 15 8 0.42 0.00
 15 15 9 -10.29 0.00
 15 15 10 0.09 0.00
 15 15 11 -14.00 0.00
 15 15 12 -1.60 0.00
 15 15 13 -0.68 0.00
 15 15 14 1.02 0.00
 15 15 15 -6.99 0.00
 15 17 0 8.21 0.00
 15 17 1 5.30 0.00
 15 17 2 1.16 0.00
 15 17 3 -8.17 0.00
 15 17 4 7.01 0.00
 15 17 5 6.38 0.00
 15 17 6 0.07 0.00
 15 17 7 2.50 0.00
 15 17 8 1.48 0.00
 15 17 9 0.47 0.00
 15 17 10 -0.60 0.00
 15 17 11 -6.17 0.00
 15 17 12 3.44 0.00
 15 17 13 -4.67 0.00
 15 17 14 -0.72 0.00
 15 17 15 -10.57 0.00
 15 19 0 -19.02 0.00
 15 19 1 -1.82 0.00
 15 19 2 -13.13 0.00
 15 19 3 2.47 0.00
 15 19 4 5.25 0.00
 15 19 5 -1.53 0.00
 15 19 6 -4.97 0.00
 15 19 7 -0.92 0.00
 15 19 8 -3.00 0.00
 15 19 9 -3.30 0.00
 15 19 10 4.99 0.00
 15 19 11 -1.72 0.00
 15 19 12 2.29 0.00
 15 19 13 -1.88 0.00
 15 19 14 2.60 0.00
 15 21 0 4.66 0.00
 15 21 1 9.24 0.00
 15 21 2 -5.61 0.00
 15 21 3 12.90 0.00
 15 21 4 5.57 0.00
 15 21 5 -2.79 0.00
 15 21 6 -10.92 0.00
 15 21 7 -10.43 0.00
 15 21 8 0.09 0.00
 15 21 9 -3.24 0.00
 15 21 10 -2.20 0.00
 15 21 11 4.32 0.00
 15 21 12 0.83 0.00
 15 21 13 1.06 0.00
 15 21 14 1.05 0.00
 15 23 0 7.09 0.00
 15 23 1 5.85 0.00
 15 23 2 -4.06 0.00
 15 23 3 7.05 0.00
 15 23 4 4.41 0.00
 15 23 5 0.92 0.00
 15 23 6 2.86 0.00
 15 23 7 0.92 0.00
 15 23 8 -0.24 0.00
 15 23 9 -0.56 0.00
 15 23 10 0.68 0.00
 15 23 11 4.42 0.00
 15 23 12 -0.22 0.00
 15 23 13 3.97 0.00
 15 25 0 -3.13 0.00
 15 25 1 2.03 0.00
 15 25 2 5.38 0.00
 15 25 3 8.68 0.00
 15 25 4 13.16 0.00
 15 25 5 1.28 0.00
 15 25 6 9.10 0.00
 15 25 7 -1.78 0.00
 15 25 8 4.49 0.00
 15 25 9 5.22 0.00
 15 25 10 0.06 0.00
 15 25 11 -4.06 0.00
 15 25 12 0.33 0.00
 15 25 13 3.54 0.00
 15 27 0 -1.01 0.00
 15 27 1 2.95 0.00
 15 27 2 -7.47 0.00
 15 27 3 -2.14 0.00
 15 27 4 1.21 0.00
 15 27 5 0.72 0.00
 15 27 6 0.21 0.00
 15 27 7 8.28 0.00
 15 27 8 -3.28 0.00
 15 27 9 5.51 0.00
 15 27 10 -5.04 0.00
 15 27 11 5.43 0.00
 15 27 12 -0.26 0.00
 15 29 0 3.62 0.00
 15 29 1 4.34 0.00
 15 29 2 3.63 0.00
 15 29 3 -0.53 0.00
 15 29 4 1.58 0.00
 15 29 5 -2.86 0.00
 15 29 6 -2.08 0.00
 15 29 7 -3.16 0.00
 15 29 8 -7.56 0.00
 15 29 9 3.41 0.00
 15 29 10 -9.39 0.00
 15 29 11 2.52 0.00
 15 31 0 12.16 0.00
 15 31 1 -2.05 0.00
 15 31 2 1.41 0.00
 15 31 3 -11.49 0.00
 15 31 4 4.60 0.00
 15 31 5 -8.13 0.00
 15 31 6 1.29 0.00
 15 31 7 0.58 0.00
 15 31 8 2.11 0.00
 15 31 9 -3.14 0.00
 15 31 10 -3.77 0.00
 15 33 0 12.65 0.00
 15 33 1 11.06 0.00
 15 33 2 0.73 0.00
 15 33 3 0.54 0.00
 15 33 4 -0.43 0.00
 15 33 5 -10.83 0.00
 15 33 6 -5.84 0.00
 15 33 7 -1.84 0.00
 15 33 8 -2.98 0.00
 15 35 0 7.45 0.00
 15 35 1 6.07 0.00
 15 35 2 8.25 0.00
 15 35 3 2.72 0.00
 15 35 4 4.99 0.00
 15 35 5 -1.44 0.00
 15 35 6 -5.56 0.00
 15 35 7 4.15 0.00
 15 37 0 -4.43 0.00
 15 37 1 -7.93 0.00
 15 37 2 -7.37 0.00
 15 37 3 3.45 0.00
 15 37 4 4.01 0.00
 15 37 5 -8.68 0.00
 15 37 6 -1.54 0.00
 15 39 0 -6.17 0.00
 15 39 1 -12.26 0.00
 15 39 2 -1.03 0.00
 15 39 3 -13.42 0.00
 16 0 0 -24.95 0.00
 16 0 1 0.66 0.00
 16 0 2 -13.96 0.00
 16 0 3 -14.46 0.00
 16 0 4 -0.08 0.00
 16 0 5 -3.70 0.00
 16 0 6 9.81 0.00
 16 0 7 -1.01 0.00
 16 0 8 -6.85 0.00
 16 0 9 3.27 0.00
 16 0 10 -0.61 0.00
 16 0 11 -4.20 0.00
 16 0 12 6.71 0.00
 16 0 13 -6.31 0.00
 16 0 14 0.68 0.00
 16 0 16 8.72 0.00
 16 2 0 -26.04 0.00
 16 2 1 -3.46 0.00
 16 2 2 -12.71 0.00
 16 2 3 -5.52 0.00
 16 2 4 5.21 0.00
 16 2 5 -5.83 0.00
 16 2 6 10.81 0.00
 16 2 7 -3.33 0.00
 16 2 8 2.45 0.00
 16 2 9 4.06 0.00
 16 2 10 2.64 0.00
 16 2 11 -9.41 0.00
 16 2 12 6.47 0.00
 16 2 13 14.58 0.00
 16 2 14 -6.88 0.00
 16 2 15 3.85 0.00
 16 2 16 6.20 0.00
 16 4 0 -7.52 0.00
 16 4 1 15.17 0.00
 16 4 2 4.95 0.00
 16 4 3 -2.37 0.00
 16 4 4 -0.85 0.00
 16 4 5 -0.88 0.00
 16 4 6 11.69 0.00
 16 4 7 1.18 0.00
 16 4 8 -3.81 0.00
 16 4 9 4.33 0.00
 16 4 10 -1.60 0.00
 16 4 11 -0.91 0.00
 16 4 12 -3.32 0.00
 16 4 13 0.36 0.00
 16 4 14 -3.70 0.00
 16 4 15 -0.94 0.00
 16 4 16 9.76 0.00
 16 6 0 -4.80 0.00
 16 6 1 5.74 0.00
 16 6 2 4.27 0.00
 16 6 3 4.69 0.00
 16 6 4 -9.49 0.00
 16 6 5 6.57 0.00
 16 6 6 4.52 0.00
 16 6 7 -1.80 0.00
 16 6 8 7.92 0.00
 16 6 9 1.01 0.00
 16 6 10 1.02 0.00
 16 6 11 -11.89 0.00
 16 6 12 -1.30 0.00
 16 6 13 -4.67 0.00
 16 6 14 -4.68 0.00
 16 6 15 -11.36 0.00
 16 6 16 0.25 0.00
 16 8 0 10.47 0.00
 16 8 1 -6.89 0.00
 16 8 2 13.43 0.00
 16 8 3 5.54 0.00
 16 8 4 -9.39 0.00
 16 8 5 0.10 0.00
 16 8 6 -2.97 0.00
 16 8 7 0.27 0.00
 16 8 8 -10.18 0.00
 16 8 9 -0.93 0.00
 16 8 10 -10.30 0.00
 16 8 11 -7.32 0.00
 16 8 12 -1.72 0.00
 16 8 13 -1.93 0.00
 16 8 14 6.08 0.00
 16 8 15 -1.60 0.00
 16 10 0 8.25 0.00
 16 10 1 -5.29 0.00
 16 10 2 3.02 0.00
 16 10 3 2.92 0.00
 16 10 4 -15.88 0.00
 16 10 5 6.57 0.00
 16 10 6 -0.60 0.00
 16 10 7 -0.59 0.00
 16 10 8 5.28 0.00
 16 10 9 0.29 0.00
 16 10 10 -2.87 0.00
 16 10 11 -7.01 0.00
 16 10 12 -2.92 0.00
 16 10 13 5.35 0.00
 16 10 14 4.02 0.00
 16 10 15 3.94 0.00
 16 12 0 3.17 0.00
 16 12 1 -22.37 0.00
 16 12 2 -7.04 0.00
 16 12 3 10.59 0.00
 16 12 4 0.75 0.00
 16 12 5 -6.02 0.00
 16 12 6 3.42 0.00
 16 12 7 0.40 0.00
 16 12 8 10.02 0.00
 16 12 9 2.87 0.00
 16 12 10 2.28 0.00
 16 12 11 -1.58 0.00
 16 12 12 15.01 0.00
 16 12 13 -1.81 0.00
 16 12 14 3.17 0.00
 16 12 15 6.15 0.00
 16 14 0 21.95 0.00
 16 14 1 -21.23 0.00
 16 14 2 -2.62 0.00
 16 14 3 0.64 0.00
 16 14 4 0.39 0.00
 16 14 5 0.47 0.00
 16 14 6 3.40 0.00
 16 14 7 7.47 0.00
 16 14 8 5.91 0.00
 16 14 9 7.89 0.00
 16 14 10 -6.99 0.00
 16 14 11 2.74 0.00
 16 14 12 1.20 0.00
 16 14 13 1.49 0.00
 16 14 14 -1.76 0.00
 16 14 15 3.82 0.00
 16 16 0 31.67 0.00
 16 16 1 -6.53 0.00
 16 16 2 5.37 0.00
 16 16 3 3.98 0.00
 16 16 4 -0.62 0.00
 16 16 5 -10.63 0.00
 16 16 6 -8.62 0.00
 16 16 7 0.03 0.00
 16 16 8 9.48 0.00
 16 16 9 -1.62 0.00
 16 16 10 -9.37 0.00
 16 16 11 5.42 0.00
 16 16 12 5.10 0.00
 16 16 13 -5.52 0.00
 16 16 14 -2.60 0.00
 16 18 0 19.00 0.00
 16 18 1 -13.57 0.00
 16 18 2 6.72 0.00
 16 18 3 3.62 0.00
 16 18 4 -0.35 0.00
 16 18 5 -6.08 0.00
 16 18 6 -3.16 0.00
 16 18 7 -2.39 0.00
 16 18 8 2.57 0.00
 16 18 9 -0.55 0.00
 16 18 10 -18.33 0.00
 16 18 11 5.43 0.00
 16 18 12 -7.14 0.00
 16 18 13 -2.43 0.00
 16 18 14 4.91 0.00
 16 20 0 5.87 0.00
 16 20 1 1.16 0.00
 16 20 2 4.60 0.00
 16 20 3 4.54 0.00
 16 20 4 -3.71 0.00
 16 20 5 -4.73 0.00
 16 20 6 2.77 0.00
 16 20 7 -4.02 0.00
 16 20 8 5.09 0.00
 16 20 9 -1.20 0.00
 16 20 10 -0.88 0.00
 16 20 11 3.33 0.00
 16 20 12 -3.61 0.00
 16 20 13 -0.39 0.00
 16 22 0 -7.41 0.00
 16 22 1 8.33 0.00
 16 22 2 -2.22 0.00
 16 22 3 17.84 0.00
 16 22 4 1.67 0.00
 16 22 5 -0.45 0.00
 16 22 6 -5.61 0.00
 16 22 7 -0.04 0.00
 16 22 8 -4.23 0.00
 16 22 9 -5.16 0.00
 16 22 10 1.78 0.00
 16 22 11 2.20 0.00
 16 22 12 -3.56 0.00
 16 22 13 0.36 0.00
 16 24 0 -2.67 0.00
 16 24 1 -7.00 0.00
 16 24 2 2.83 0.00
 16 24 3 -1.95 0.00
 16 24 4 4.93 0.00
 16 24 5 1.31 0.00
 16 24 6 0.27 0.00
 16 24 7 2.65 0.00
 16 24 8 -4.86 0.00
 16 24 9 -5.41 0.00
 16 24 10 6.50 0.00
 16 24 11 -2.07 0.00
 16 24 12 -4.03 0.00
 16 26 0 -1.76 0.00
 16 26 1 -4.50 0.00
 16 26 2 -0.38 0.00
 16 26 3 11.02 0.00
 16 26 4 8.54 0.00
 16 26 5 6.61 0.00
 16 26 6 0.09 0.00
 16 26 7 0.77 0.00
 16 26 8 -0.83 0.00
 16 26 9 -5.62 0.00
 16 26 10 3.22 0.00
 16 26 11 0.48 0.00
 16 28 0 -4.43 0.00
 16 28 1 3.36 0.00
 16 28 2 -1.06 0.00
 16 28 3 4.77 0.00
 16 28 4 14.21 0.00
 16 28 5 9.07 0.00
 16 28 6 4.93 0.00
 16 28 7 5.35 0.00
 16 28 8 -3.68 0.00
 16 28 9 1.30 0.00
 16 28 10 11.13 0.00
 16 30 0 -3.66 0.00
 16 30 1 -7.14 0.00
 16 30 2 -0.87 0.00
 16 30 3 -1.19 0.00
 16 30 4 -0.94 0.00
 16 30 5 0.85 0.00
 16 30 6 3.81 0.00
 16 30 7 -8.24 0.00
 16 30 8 9.19 0.00
 16 30 9 -1.16 0.00
 16 32 0 11.35 0.00
 16 32 1 10.07 0.00
 16 32 2 -0.26 0.00
 16 32 3 1.41 0.00
 16 32 4 2.98 0.00
 16 32 5 -1.07 0.00
 16 32 6 2.31 0.00
 16 32 7 -1.73 0.00
 16 32 8 3.52 0.00
 16 34 0 5.46 0.00
 16 34 1 -1.28 0.00
 16 34 2 12.95 0.00
 16 34 3 -0.84 0.00
 16 34 4 -0.90 0.00
 16 34 5 4.64 0.00
 16 34 6 1.51 0.00
 16 34 7 1.87 0.00
 16 36 0 -1.37 0.00
 16 36 1 10.82 0.00
 16 36 2 3.45 0.00
 16 36 3 7.33 0.00
 16 36 4 -2.47 0.00
 16 36 5 1.64 0.00
 16 38 1 -11.33 0.00
 16 38 2 -2.67 0.00
 17 1 0 -21.10 0.00
 17 1 1 11.98 0.00
 17 1 2 -19.45 0.00
 17 1 3 -7.54 0.00
 17 1 4 1.83 0.00
 17 1 5 -1.31 0.00
 17 1 6 7.43 0.00
 17 1 7 1.76 0.00
 17 1 8 0.46 0.00
 17 1 9 7.61 0.00
 17 1 10 -4.13 0.00
 17 1 11 3.20 0.00
 17 1 12 -12.18 0.00
 17 1 13 2.63 0.00
 17 1 14 -0.10 0.00
 17 1 15 0.09 0.00
 17 3 0 17.48 0.00
 17 3 1 0.60 0.00
 17 3 2 -1.84 0.00
 17 3 3 -9.00 0.00
 17 3 4 -2.56 0.00
 17 3 5 -9.54 0.00
 17 3 6 -0.77 0.00
 17 3 7 12.85 0.00
 17 3 8 -2.29 0.00
 17 3 9 6.55 0.00
 17 3 10 -3.73 0.00
 17 3 11 -10.28 0.00
 17 3 12 -3.86 0.00
 17 3 13 -7.51 0.00
 17 3 14 6.68 0.00
 17 5 0 4.88 0.00
 17 5 1 -2.78 0.00
 17 5 2 6.69 0.00
 17 5 3 -3.40 0.00
 17 5 4 4.00 0.00
 17 5 5 6.94 0.00
 17 5 6 -3.89 0.00
 17 5 7 -0.09 0.00
 17 5 8 -3.20 0.00
 17 5 9 6.85 0.00
 17 5 10 8.43 0.00
 17 5 11 7.35 0.00
 17 5 12 -0.86 0.00
 17 5 13 8.98 0.00
 17 5 14 4.06 0.00
 17 7 0 11.94 0.00
 17 7 1 -3.76 0.00
 17 7 2 -2.07 0.00
 17 7 3 4.26 0.00
 17 7 4 -4.37 0.00
 17 7 5 -0.53 0.00
 17 7 6 -1.66 0.00
 17 7 7 20.92 0.00
 17 7 8 4.25 0.00
 17 7 9 0.19 0.00
 17 7 10 5.84 0.00
 17 7 11 -4.78 0.00
 17 7 12 -1.45 0.00
 17 7 13 -1.55 0.00
 17 7 14 3.29 0.00
 17 9 0 -13.94 0.00
 17 9 1 -8.00 0.00
 17 9 2 -3.90 0.00
 17 9 3 8.43 0.00
 17 9 4 -4.12 0.00
 17 9 5 8.90 0.00
 17 9 6 -5.79 0.00
 17 9 7 1.97 0.00
 17 9 8 -2.35 0.00
 17 9 9 -0.97 0.00
 17 9 10 2.48 0.00
 17 9 11 -1.42 0.00
 17 9 12 -4.29 0.00
 17 9 13 -0.58 0.00
 17 9 14 -0.11 0.00
 17 11 0 3.47 0.00
 17 11 1 -8.89 0.00
 17 11 2 1.73 0.00
 17 11 3 2.76 0.00
 17 11 4 5.14 0.00
 17 11 5 -3.09 0.00
 17 11 6 -4.08 0.00
 17 11 7 2.68 0.00
 17 11 8 -0.21 0.00
 17 11 9 -8.69 0.00
 17 11 10 -2.65 0.00
 17 11 11 0.81 0.00
 17 11 12 -3.95 0.00
 17 11 13 1.48 0.00
 17 11 14 12.82 0.00
 17 13 0 -11.13 0.00
 17 13 1 -2.94 0.00
 17 13 2 8.91 0.00
 17 13 3 2.72 0.00
 17 13 4 7.46 0.00
 17 13 5 9.11 0.00
 17 13 6 0.48 0.00
 17 13 7 1.61 0.00
 17 13 8 3.87 0.00
 17 13 9 4.66 0.00
 17 13 10 3.66 0.00
 17 13 11 8.23 0.00
 17 13 12 -2.74 0.00
 17 13 13 -2.97 0.00
 17 13 14 -3.58 0.00
 17 15 0 -7.68 0.00
 17 15 1 10.06 0.00
 17 15 2 1.91 0.00
 17 15 3 4.59 0.00
 17 15 4 5.36 0.00
 17 15 5 -6.52 0.00
 17 15 6 1.75 0.00
 17 15 7 -2.79 0.00
 17 15 8 0.12 0.00
 17 15 9 4.40 0.00
 17 15 10 -3.64 0.00
 17 15 11 1.93 0.00
 17 15 12 -10.13 0.00
 17 15 13 7.99 0.00
 17 15 14 -3.87 0.00
 17 17 0 -1.88 0.00
 17 17 1 15.17 0.00
 17 17 2 7.26 0.00
 17 17 3 1.30 0.00
 17 17 4 3.36 0.00
 17 17 5 -5.88 0.00
 17 17 6 -1.91 0.00
 17 17 7 2.73 0.00
 17 17 8 -0.04 0.00
 17 17 9 4.42 0.00
 17 17 10 -4.10 0.00
 17 17 11 -2.55 0.00
 17 17 12 -0.61 0.00
 17 17 13 0.56 0.00
 17 19 0 -0.60 0.00
 17 19 1 14.95 0.00
 17 19 2 8.80 0.00
 17 19 3 2.73 0.00
 17 19 4 8.61 0.00
 17 19 5 -7.60 0.00
 17 19 6 2.00 0.00
 17 19 7 1.25 0.00
 17 19 8 4.63 0.00
 17 19 9 4.82 0.00
 17 19 10 2.41 0.00
 17 19 11 -1.65 0.00
 17 19 12 -2.16 0.00
 17 19 13 6.54 0.00
 17 21 0 3.04 0.00
 17 21 1 -1.01 0.00
 17 21 2 15.40 0.00
 17 21 3 -3.15 0.00
 17 21 4 4.94 0.00
 17 21 5 -6.49 0.00
 17 21 6 -3.07 0.00
 17 21 7 -0.93 0.00
 17 21 8 8.85 0.00
 17 21 9 13.69 0.00
 17 21 10 -1.39 0.00
 17 21 11 5.81 0.00
 17 21 12 8.08 0.00
 17 23 0 -1.71 0.00
 17 23 1 -1.04 0.00
 17 23 2 5.15 0.00
 17 23 3 -9.48 0.00
 17 23 4 -8.92 0.00
 17 23 5 -1.93 0.00
 17 23 6 -4.32 0.00
 17 23 7 -1.97 0.00
 17 23 8 -2.96 0.00
 17 23 9 2.62 0.00
 17 23 10 -5.20 0.00
 17 23 11 -1.70 0.00
 17 23 12 9.07 0.00
 17 25 0 -12.64 0.00
 17 25 1 -0.05 0.00
 17 25 2 4.59 0.00
 17 25 3 -1.67 0.00
 17 25 4 -2.78 0.00
 17 25 5 -0.46 0.00
 17 25 6 5.17 0.00
 17 25 7 -13.72 0.00
 17 25 8 -1.03 0.00
 17 25 9 -0.19 0.00
 17 25 10 -2.03 0.00
 17 25 11 -13.08 0.00
 17 27 0 -6.36 0.00
 17 27 1 -3.63 0.00
 17 27 2 1.10 0.00
 17 27 3 0.76 0.00
 17 27 4 -4.30 0.00
 17 27 5 5.10 0.00
 17 27 6 4.33 0.00
 17 27 7 1.47 0.00
 17 27 8 3.39 0.00
 17 27 9 0.61 0.00
 17 27 10 4.85 0.00
 17 29 0 4.04 0.00
 17 29 1 4.27 0.00
 17 29 2 5.05 0.00
 17 29 3 3.48 0.00
 17 29 4 2.85 0.00
 17 29 5 10.65 0.00
 17 29 6 2.87 0.00
 17 29 7 -3.89 0.00
 17 29 8 -5.53 0.00
 17 31 0 -16.29 0.00
 17 31 1 -11.69 0.00
 17 31 2 -4.82 0.00
 17 31 3 -6.49 0.00
 17 31 4 -5.35 0.00
 17 31 5 1.01 0.00
 17 31 6 -6.35 0.00
 17 31 7 1.63 0.00
 17 33 0 -12.48 0.00
 17 33 1 7.68 0.00
 17 33 2 -18.74 0.00
 17 33 3 2.62 0.00
 17 33 4 -6.13 0.00
 17 33 5 2.17 0.00
 17 33 6 -7.00 0.00
 17 35 1 -2.01 0.00
 17 35 2 -3.67 0.00
 17 35 3 2.65 0.00
 17 35 4 3.48 0.00
 18 0 0 34.81 0.00
 18 0 1 -14.58 0.00
 18 0 2 12.23 0.00
 18 0 3 2.07 0.00
 18 0 4 -7.07 0.00
 18 0 5 7.58 0.00
 18 0 6 -5.94 0.00
 18 0 7 6.96 0.00
 18 0 8 4.40 0.00
 18 0 9 0.01 0.00
 18 0 10 -2.89 0.00
 18 0 11 -5.25 0.00
 18 0 12 -1.92 0.00
 18 2 0 21.79 0.00
 18 2 1 -15.75 0.00
 18 2 2 0.07 0.00
 18 2 3 5.85 0.00
 18 2 4 -1.00 0.00
 18 2 5 5.37 0.00
 18 2 6 -7.11 0.00
 18 2 7 -0.42 0.00
 18 2 8 8.90 0.00
 18 2 9 -2.04 0.00
 18 2 10 7.32 0.00
 18 2 11 -2.57 0.00
 18 2 12 3.31 0.00
 18 2 13 -3.15 0.00
 18 4 0 3.26 0.00
 18 4 1 9.09 0.00
 18 4 2 1.43 0.00
 18 4 3 5.67 0.00
 18 4 4 -10.34 0.00
 18 4 5 -4.00 0.00
 18 4 6 -4.73 0.00
 18 4 7 -0.70 0.00
 18 4 8 -0.50 0.00
 18 4 9 -2.09 0.00
 18 4 10 2.41 0.00
 18 4 11 5.72 0.00
 18 4 12 -0.69 0.00
 18 4 13 -7.71 0.00
 18 6 0 -7.42 0.00
 18 6 1 2.52 0.00
 18 6 2 -4.18 0.00
 18 6 3 7.30 0.00
 18 6 4 -1.04 0.00
 18 6 5 0.03 0.00
 18 6 6 -3.65 0.00
 18 6 7 -4.31 0.00
 18 6 8 2.43 0.00
 18 6 9 2.23 0.00
 18 6 10 2.83 0.00
 18 6 11 1.99 0.00
 18 6 12 -4.05 0.00
 18 6 13 -8.20 0.00
 18 8 0 -5.70 0.00
 18 8 1 -1.73 0.00
 18 8 2 11.01 0.00
 18 8 3 -5.69 0.00
 18 8 4 4.00 0.00
 18 8 5 -10.70 0.00
 18 8 6 6.25 0.00
 18 8 7 -0.97 0.00
 18 8 8 -1.02 0.00
 18 8 9 4.67 0.00
 18 8 10 0.34 0.00
 18 8 11 5.87 0.00
 18 8 12 -2.42 0.00
 18 8 13 5.16 0.00
 18 10 0 -3.08 0.00
 18 10 1 7.14 0.00
 18 10 2 7.70 0.00
 18 10 3 -6.77 0.00
 18 10 4 11.56 0.00
 18 10 5 -3.10 0.00
 18 10 6 14.22 0.00
 18 10 7 -9.85 0.00
 18 10 8 8.80 0.00
 18 10 9 0.00 0.00
 18 10 10 4.69 0.00
 18 10 11 -3.70 0.00
 18 10 12 -5.93 0.00
 18 10 13 4.01 0.00
 18 12 0 -19.41 0.00
 18 12 1 6.71 0.00
 18 12 2 -3.95 0.00
 18 12 3 10.17 0.00
 18 12 4 4.82 0.00
 18 12 5 0.50 0.00
 18 12 6 2.43 0.00
 18 12 7 -2.86 0.00
 18 12 8 -3.69 0.00
 18 12 9 0.69 0.00
 18 12 10 5.01 0.00
 18 12 11 -9.97 0.00
 18 12 12 6.37 0.00
 18 12 13 -2.19 0.00
 18 14 0 -10.18 0.00
 18 14 1 0.33 0.00
 18 14 2 -9.75 0.00
 18 14 3 -5.49 0.00
 18 14 4 2.12 0.00
 18 14 5 -0.22 0.00
 18 14 6 1.49 0.00
 18 14 7 -3.92 0.00
 18 14 8 -3.76 0.00
 18 14 9 4.76 0.00
 18 14 10 0.56 0.00
 18 14 11 0.95 0.00
 18 14 12 -4.58 0.00
 18 14 13 5.58 0.00
 18 16 0 -2.76 0.00
 18 16 1 10.41 0.00
 18 16 2 4.20 0.00
 18 16 3 2.84 0.00
 18 16 4 6.63 0.00
 18 16 5 2.61 0.00
 18 16 6 -0.68 0.00
 18 16 7 -1.49 0.00
 18 16 8 1.14 0.00
 18 16 9 -1.97 0.00
 18 16 10 6.07 0.00
 18 16 11 -4.03 0.00
 18 16 12 1.85 0.00
 18 18 0 -11.09 0.00
 18 18 1 1.19 0.00
 18 18 2 3.63 0.00
 18 18 3 6.43 0.00
 18 18 4 2.83 0.00
 18 18 5 4.68 0.00
 18 18 6 -4.56 0.00
 18 18 7 -0.19 0.00
 18 18 8 -1.99 0.00
 18 18 9 -0.62 0.00
 18 18 10 6.37 0.00
 18 18 11 -0.69 0.00
 18 18 12 0.09 0.00
 18 20 0 -4.36 0.00
 18 20 1 4.57 0.00
 18 20 2 3.88 0.00
 18 20 3 -0.91 0.00
 18 20 4 -3.61 0.00
 18 20 5 0.88 0.00
 18 20 6 -3.54 0.00
 18 20 7 -0.16 0.00
 18 20 8 -3.79 0.00
 18 20 9 2.91 0.00
 18 20 10 18.43 0.00
 18 20 11 -3.30 0.00
 18 22 0 -6.33 0.00
 18 22 1 0.91 0.00
 18 22 2 3.97 0.00
 18 22 3 11.42 0.00
 18 22 4 0.70 0.00
 18 22 5 -1.95 0.00
 18 22 6 -1.18 0.00
 18 22 7 6.07 0.00
 18 22 8 1.63 0.00
 18 22 9 0.82 0.00
 18 22 10 17.39 0.00
 18 22 11 4.94 0.00
 18 24 0 6.93 0.00
 18 24 1 -10.15 0.00
 18 24 2 1.51 0.00
 18 24 3 -14.08 0.00
 18 24 4 2.13 0.00
 18 24 5 -3.49 0.00
 18 24 6 6.28 0.00
 18 24 7 4.06 0.00
 18 24 8 8.01 0.00
 18 24 9 5.36 0.00
 18 24 10 17.15 0.00
 18 26 0 8.68 0.00
 18 26 1 6.41 0.00
 18 26 2 -0.89 0.00
 18 26 3 1.61 0.00
 18 26 4 -12.83 0.00
 18 26 5 -1.83 0.00
 18 26 6 -3.90 0.00
 18 26 7 2.86 0.00
 18 26 8 -0.01 0.00
 18 26 9 -3.12 0.00
 18 28 0 10.34 0.00
 18 28 1 11.36 0.00
 18 28 2 -1.91 0.00
 18 28 3 -8.00 0.00
 18 28 4 1.76 0.00
 18 28 5 -0.87 0.00
 18 28 6 -6.52 0.00
 18 28 7 -1.82 0.00
 18 30 0 14.44 0.00
 18 30 1 21.22 0.00
 18 30 2 8.42 0.00
 18 30 3 8.97 0.00
 18 30 4 -1.35 0.00
 18 30 5 2.71 0.00
 18 30 6 3.77 0.00
 18 32 1 11.06 0.00
 18 32 2 -13.63 0.00
 18 32 3 -0.92 0.00
 18 32 4 2.65 0.00
 18 34 2 -15.91 0.00
 19 1 0 -7.47 0.00
 19 1 1 2.46 0.00
 19 1 2 -2.48 0.00
 19 1 3 2.62 0.00
 19 1 4 0.08 0.00
 19 1 5 0.01 0.00
 19 1 6 -5.06 0.00
 19 1 7 -1.87 0.00
 19 1 8 2.93 0.00
 19 1 9 -0.19 0.00
 19 1 10 10.14 0.00
 19 1 11 8.83 0.00
 19 1 12 -4.33 0.00
 19 3 0 -3.06 0.00
 19 3 1 -2.21 0.00
 19 3 2 -1.23 0.00
 19 3 3 9.17 0.00
 19 3 4 -1.43 0.00
 19 3 5 -2.70 0.00
 19 3 6 -5.44 0.00
 19 3 7 3.60 0.00
 19 3 8 -2.60 0.00
 19 3 9 -1.52 0.00
 19 3 10 0.87 0.00
 19 3 11 -8.29 0.00
 19 3 12 -4.79 0.00
 19 5 0 -2.69 0.00
 19 5 1 2.63 0.00
 19 5 2 10.86 0.00
 19 5 3 -1.51 0.00
 19 5 4 10.63 0.00
 19 5 5 -5.28 0.00
 19 5 6 2.16 0.00
 19 5 7 -13.40 0.00
 19 5 8 0.17 0.00
 19 5 9 4.07 0.00
 19 5 10 -0.39 0.00
 19 5 11 5.67 0.00
 19 5 12 -6.87 0.00
 19 7 0 -7.70 0.00
 19 7 1 13.62 0.00
 19 7 2 2.82 0.00
 19 7 3 13.72 0.00
 19 7 4 -0.97 0.00
 19 7 5 -3.64 0.00
 19 7 6 -4.19 0.00
 19 7 7 3.82 0.00
 19 7 8 -6.00 0.00
 19 7 9 -0.06 0.00
 19 7 10 -2.79 0.00
 19 7 11 -4.04 0.00
 19 7 12 -1.47 0.00
 19 9 0 -7.21 0.00
 19 9 1 4.73 0.00
 19 9 2 6.61 0.00
 19 9 3 3.05 0.00
 19 9 4 1.11 0.00
 19 9 5 -3.36 0.00
 19 9 6 1.66 0.00
 19 9 7 -4.91 0.00
 19 9 8 -2.16 0.00
 19 9 9 0.72 0.00
 19 9 10 -4.20 0.00
 19 9 11 -0.68 0.00
 19 9 12 -0.77 0.00
 19 11 0 -0.24 0.00
 19 11 1 -1.34 0.00
 19 11 2 0.73 0.00
 19 11 3 -5.83 0.00
 19 11 4 -0.97 0.00
 19 11 5 -5.22 0.00
 19 11 6 -2.41 0.00
 19 11 7 4.16 0.00
 19 11 8 -1.89 0.00
 19 11 9 6.48 0.00
 19 11 10 -2.68 0.00
 19 11 11 10.73 0.00
 19 11 12 2.35 0.00
 19 13 0 -8.31 0.00
 19 13 1 2.03 0.00
 19 13 2 2.74 0.00
 19 13 3 -2.78 0.00
 19 13 4 -0.87 0.00
 19 13 5 6.49 0.00
 19 13 6 2.16 0.00
 19 13 7 -0.23 0.00
 19 13 8 6.99 0.00
 19 13 9 -3.69 0.00
 19 13 10 4.45 0.00
 19 13 11 -2.16 0.00
 19 13 12 0.12 0.00
 19 15 0 4.40 0.00
 19 15 1 -4.59 0.00
 19 15 2 -3.38 0.00
 19 15 3 -7.32 0.00
 19 15 4 0.19 0.00
 19 15 5 -1.88 0.00
 19 15 6 1.11 0.00
 19 15 7 -1.58 0.00
 19 15 8 -1.09 0.00
 19 15 9 1.02 0.00
 19 15 10 -0.08 0.00
 19 15 11 -2.68 0.00
 19 15 12 -0.51 0.00
 19 17 0 6.88 0.00
 19 17 1 -10.57 0.00
 19 17 2 -5.39 0.00
 19 17 3 -2.60 0.00
 19 17 4 -10.36 0.00
 19 17 5 2.24 0.00
 19 17 6 -6.74 0.00
 19 17 7 -0.30 0.00
 19 17 8 -4.26 0.00
 19 17 9 -4.67 0.00
 19 17 10 6.03 0.00
 19 17 11 -2.83 0.00
 19 19 0 -4.72 0.00
 19 19 1 -2.01 0.00
 19 19 2 -9.59 0.00
 19 19 3 10.06 0.00
 19 19 4 1.74 0.00
 19 19 5 3.30 0.00
 19 19 6 0.69 0.00
 19 19 7 -5.09 0.00
 19 19 8 -2.03 0.00
 19 19 9 -5.71 0.00
 19 19 10 1.19 0.00
 19 19 11 -2.25 0.00
 19 21 0 13.24 0.00
 19 21 1 -6.84 0.00
 19 21 2 6.60 0.00
 19 21 3 11.48 0.00
 19 21 4 6.09 0.00
 19 21 5 2.83 0.00
 19 21 6 -0.84 0.00
 19 21 7 -7.10 0.00
 19 21 8 -3.59 0.00
 19 21 9 3.51 0.00
 19 21 10 -2.09 0.00
 19 23 0 6.87 0.00
 19 23 1 2.47 0.00
 19 23 2 9.68 0.00
 19 23 3 11.31 0.00
 19 23 4 7.62 0.00
 19 23 5 5.59 0.00
 19 23 6 2.53 0.00
 19 23 7 0.86 0.00
 19 23 8 -3.85 0.00
 19 23 9 0.54 0.00
 19 25 0 -8.36 0.00
 19 25 1 4.45 0.00
 19 25 2 -16.77 0.00
 19 25 3 1.29 0.00
 19 25 4 -8.01 0.00
 19 25 5 1.79 0.00
 19 25 6 0.29 0.00
 19 25 7 -0.77 0.00
 19 25 8 -8.49 0.00
 19 27 0 2.88 0.00
 19 27 1 -8.77 0.00
 19 27 2 -4.88 0.00
 19 27 3 -0.66 0.00
 19 27 4 -11.02 0.00
 19 27 5 -2.90 0.00
 19 27 6 -1.84 0.00
 19 29 2 0.47 0.00
 19 29 3 0.06 0.00
 19 29 4 -3.85 0.00
 20 0 0 -3.41 0.00
 20 0 1 -0.63 0.00
 20 0 2 -12.90 0.00
 20 0 3 -4.17 0.00
 20 0 4 1.61 0.00
 20 0 5 4.92 0.00
 20 0 6 -3.13 0.00
 20 0 7 -9.73 0.00
 20 0 8 -0.27 0.00
 20 0 9 5.92 0.00
 20 0 10 -14.91 0.00
 20 2 0 3.05 0.00
 20 2 1 1.91 0.00
 20 2 2 -5.51 0.00
 20 2 3 -4.53 0.00
 20 2 4 2.08 0.00
 20 2 5 -0.08 0.00
 20 2 6 -4.43 0.00
 20 2 7 -4.92 0.00
 20 2 8 6.29 0.00
 20 2 9 0.29 0.00
 20 2 10 0.88 0.00
 20 2 11 -2.27 0.00
 20 4 0 13.16 0.00
 20 4 1 -8.35 0.00
 20 4 2 8.75 0.00
 20 4 3 -11.18 0.00
 20 4 4 7.05 0.00
 20 4 5 -1.79 0.00
 20 4 6 -0.45 0.00
 20 4 7 -3.92 0.00
 20 4 8 2.84 0.00
 20 4 9 2.73 0.00
 20 4 10 -6.02 0.00
 20 4 11 1.50 0.00
 20 6 0 9.91 0.00
 20 6 1 -8.19 0.00
 20 6 2 6.69 0.00
 20 6 3 2.75 0.00
 20 6 4 7.14 0.00
 20 6 5 1.19 0.00
 20 6 6 -3.56 0.00
 20 6 7 1.16 0.00
 20 6 8 3.17 0.00
 20 6 9 -1.41 0.00
 20 6 10 1.09 0.00
 20 6 11 0.86 0.00
 20 8 0 -5.69 0.00
 20 8 1 -2.47 0.00
 20 8 2 -3.07 0.00
 20 8 3 3.12 0.00
 20 8 4 -3.07 0.00
 20 8 5 2.56 0.00
 20 8 6 -2.09 0.00
 20 8 7 5.33 0.00
 20 8 8 4.52 0.00
 20 8 9 0.44 0.00
 20 8 10 1.53 0.00
 20 8 11 3.90 0.00
 20 10 0 0.19 0.00
 20 10 1 1.52 0.00
 20 10 2 -4.07 0.00
 20 10 3 -0.06 0.00
 20 10 4 -0.65 0.00
 20 10 5 -0.98 0.00
 20 10 6 -8.27 0.00
 20 10 7 0.88 0.00
 20 10 8 -2.50 0.00
 20 10 9 0.83 0.00
 20 10 10 4.01 0.00
 20 10 11 4.03 0.00
 20 12 0 3.19 0.00
 20 12 1 -12.14 0.00
 20 12 2 -3.08 0.00
 20 12 3 6.32 0.00
 20 12 4 -2.20 0.00
 20 12 5 3.71 0.00
 20 12 6 -8.41 0.00
 20 12 7 6.78 0.00
 20 12 8 -3.04 0.00
 20 12 9 3.40 0.00
 20 12 10 2.01 0.00
 20 12 11 -6.15 0.00
 20 14 0 15.72 0.00
 20 14 1 -2.13 0.00
 20 14 2 -6.06 0.00
 20 14 3 -0.17 0.00
 20 14 4 -2.00 0.00
 20 14 5 -0.86 0.00
 20 14 6 -2.64 0.00
 20 14 7 -0.90 0.00
 20 14 8 0.18 0.00
 20 14 9 2.26 0.00
 20 14 10 -3.15 0.00
 20 14 11 2.80 0.00
 20 16 0 20.72 0.00
 20 16 1 -1.19 0.00
 20 16 2 0.67 0.00
 20 16 3 1.52 0.00
 20 16 4 0.42 0.00
 20 16 5 6.00 0.00
 20 16 6 -2.07 0.00
 20 16 7 -1.65 0.00
 20 16 8 -2.34 0.00
 20 16 9 -5.90 0.00
 20 16 10 -15.05 0.00
 20 18 0 5.47 0.00
 20 18 1 -4.90 0.00
 20 18 2 0.82 0.00
 20 18 3 -1.82 0.00
 20 18 4 1.54 0.00
 20 18 5 -2.17 0.00
 20 18 6 1.67 0.00
 20 18 7 -4.27 0.00
 20 18 8 -2.23 0.00
 20 18 9 -4.97 0.00
 20 18 10 -16.14 0.00
 20 20 0 11.45 0.00
 20 20 1 7.84 0.00
 20 20 2 -0.68 0.00
 20 20 3 -5.44 0.00
 20 20 4 0.71 0.00
 20 20 5 3.75 0.00
 20 20 6 -0.71 0.00
 20 20 7 -3.53 0.00
 20 20 8 -6.21 0.00
 20 20 9 0.71 0.00
 20 22 0 -1.93 0.00
 20 22 1 7.13 0.00
 20 22 2 8.21 0.00
 20 22 3 15.54 0.00
 20 22 4 3.48 0.00
 20 22 5 3.25 0.00
 20 22 6 -1.45 0.00
 20 22 7 2.42 0.00
 20 22 8 -9.01 0.00
 20 24 0 11.76 0.00
 20 24 1 8.84 0.00
 20 24 2 6.55 0.00
 20 24 3 -1.15 0.00
 20 24 4 13.26 0.00
 20 24 5 6.43 0.00
 20 24 6 2.93 0.00
 20 26 0 1.26 0.00
 20 26 1 8.33 0.00
 20 26 2 8.03 0.00
 20 26 3 7.92 0.00
 20 26 4 -4.23 0.00
 21 1 0 6.82 0.00
 21 1 1 10.95 0.00
 21 1 2 4.25 0.00
 21 1 3 -9.46 0.00
 21 1 4 6.70 0.00
 21 1 5 3.96 0.00
 21 1 6 3.65 0.00
 21 1 7 2.73 0.00
 21 1 8 -8.02 0.00
 21 1 9 2.87 0.00
 21 3 0 -9.43 0.00
 21 3 1 3.68 0.00
 21 3 2 -11.18 0.00
 21 3 3 -2.64 0.00
 21 3 4 -4.12 0.00
 21 3 5 -3.60 0.00
 21 3 6 2.69 0.00
 21 3 7 -2.73 0.00
 21 3 8 -3.45 0.00
 21 3 9 -2.52 0.00
 21 3 10 2.71 0.00
 21 5 0 -1.41 0.00
 21 5 1 3.46 0.00
 21 5 2 -8.10 0.00
 21 5 3 -12.64 0.00
 21 5 4 -6.05 0.00
 21 5 5 -2.58 0.00
 21 5 6 5.40 0.00
 21 5 7 -2.50 0.00
 21 5 8 1.66 0.00
 21 5 9 7.56 0.00
 21 5 10 2.49 0.00
 21 7 0 -7.14 0.00
 21 7 1 2.77 0.00
 21 7 2 -2.75 0.00
 21 7 3 4.48 0.00
 21 7 4 -4.55 0.00
 21 7 5 1.19 0.00
 21 7 6 3.53 0.00
 21 7 7 2.05 0.00
 21 7 8 -0.45 0.00
 21 7 9 -0.70 0.00
 21 7 10 8.87 0.00
 21 9 0 10.31 0.00
 21 9 1 -5.11 0.00
 21 9 2 5.00 0.00
 21 9 3 1.35 0.00
 21 9 4 -1.91 0.00
 21 9 5 0.58 0.00
 21 9 6 11.68 0.00
 21 9 7 -0.09 0.00
 21 9 8 2.61 0.00
 21 9 9 -1.46 0.00
 21 9 10 1.62 0.00
 21 11 0 1.85 0.00
 21 11 1 -7.86 0.00
 21 11 2 -0.69 0.00
 21 11 3 3.33 0.00
 21 11 4 -1.28 0.00
 21 11 5 2.09 0.00
 21 11 6 -0.80 0.00
 21 11 7 2.53 0.00
 21 11 8 -4.06 0.00
 21 11 9 11.60 0.00
 21 11 10 -0.27 0.00
 21 13 0 -14.53 0.00
 21 13 1 3.99 0.00
 21 13 2 -11.16 0.00
 21 13 3 6.26 0.00
 21 13 4 -9.26 0.00
 21 13 5 3.11 0.00
 21 13 6 -4.50 0.00
 21 13 7 -6.96 0.00
 21 13 8 -0.99 0.00
 21 13 9 -9.49 0.00
 21 15 0 -9.56 0.00
 21 15 1 0.50 0.00
 21 15 2 -3.62 0.00
 21 15 3 -1.19 0.00
 21 15 4 13.12 0.00
 21 15 5 -2.45 0.00
 21 15 6 2.45 0.00
 21 15 7 -6.82 0.00
 21 15 8 -2.60 0.00
 21 15 9 -4.62 0.00
 21 17 0 19.38 0.00
 21 17 1 9.89 0.00
 21 17 2 9.29 0.00
 21 17 3 -1.61 0.00
 21 17 4 4.95 0.00
 21 17 5 0.83 0.00
 21 17 6 1.70 0.00
 21 17 7 -6.23 0.00
 21 17 8 -3.50 0.00
 21 19 0 -16.37 0.00
 21 19 1 14.15 0.00
 21 19 2 -7.28 0.00
 21 19 3 4.11 0.00
 21 19 4 1.48 0.00
 21 19 5 4.04 0.00
 21 19 6 -2.53 0.00
 21 19 7 -1.05 0.00
 21 21 0 8.64 0.00
 21 21 1 -0.19 0.00
 21 21 2 -2.69 0.00
 21 21 3 -12.49 0.00
 21 21 4 -8.44 0.00
 21 21 5 -0.82 0.00
 21 21 6 -0.63 0.00
 21 23 0 -6.94 0.00
 21 23 1 9.23 0.00
 21 23 2 10.58 0.00
 21 23 3 -2.18 0.00
 21 23 4 6.80 0.00
 22 0 0 8.31 0.00
 22 0 1 0.65 0.00
 22 0 2 -0.72 0.00
 22 0 3 8.12 0.00
 22 0 4 0.42 0.00
 22 0 6 1.55 0.00
 22 0 7 -7.86 0.00
 22 0 8 -9.66 0.00
 22 2 0 -2.77 0.00
 22 2 1 2.38 0.00
 22 2 2 6.09 0.00
 22 2 3 2.82 0.00
 22 2 4 -2.50 0.00
 22 2 5 3.51 0.00
 22 2 6 6.91 0.00
 22 2 7 -0.62 0.00
 22 2 8 -5.47 0.00
 22 4 0 -5.79 0.00
 22 4 1 1.96 0.00
 22 4 2 -2.27 0.00
 22 4 3 -1.84 0.00
 22 4 4 -11.20 0.00
 22 4 5 4.69 0.00
 22 4 6 -1.81 0.00
 22 4 7 -2.99 0.00
 22 4 8 -5.54 0.00
 22 6 0 0.14 0.00
 22 6 1 6.47 0.00
 22 6 2 7.94 0.00
 22 6 3 5.63 0.00
 22 6 4 -9.84 0.00
 22 6 5 -3.32 0.00
 22 6 6 -0.08 0.00
 22 6 7 -0.23 0.00
 22 6 8 -6.24 0.00
 22 8 0 -3.54 0.00
 22 8 1 0.60 0.00
 22 8 2 6.91 0.00
 22 8 3 -0.15 0.00
 22 8 4 -3.96 0.00
 22 8 5 1.83 0.00
 22 8 6 9.73 0.00
 22 8 7 -1.14 0.00
 22 8 8 6.66 0.00
 22 10 0 -0.37 0.00
 22 10 1 6.39 0.00
 22 10 2 8.03 0.00
 22 10 3 -6.10 0.00
 22 10 4 -2.62 0.00
 22 10 5 -5.13 0.00
 22 10 6 -0.72 0.00
 22 10 7 -1.09 0.00
 22 10 8 -5.26 0.00
 22 12 0 -6.34 0.00
 22 12 1 -19.50 0.00
 22 12 2 11.19 0.00
 22 12 3 -9.98 0.00
 22 12 4 8.18 0.00
 22 12 5 -2.56 0.00
 22 12 6 5.96 0.00
 22 12 7 -3.21 0.00
 22 12 8 1.49 0.00
 22 14 0 -9.07 0.00
 22 14 1 6.64 0.00
 22 14 2 -4.86 0.00
 22 14 3 -2.35 0.00
 22 14 4 -4.39 0.00
 22 14 5 0.02 0.00
 22 14 6 -3.12 0.00
 22 14 7 -0.51 0.00
 22 16 0 -3.03 0.00
 22 16 1 -11.03 0.00
 22 16 2 -0.72 0.00
 22 16 3 -4.10 0.00
 22 16 4 -1.32 0.00
 22 16 5 8.11 0.00
 22 16 6 -10.43 0.00
 22 16 7 6.27 0.00
 22 18 0 -4.92 0.00
 22 18 1 1.16 0.00
 22 18 2 3.93 0.00
 22 18 3 -0.06 0.00
 22 18 4 5.91 0.00
 22 18 5 -4.32 0.00
 22 18 6 5.52 0.00
 22 20 0 10.40 0.00
 22 20 1 4.15 0.00
 22 20 2 -1.06 0.00
 22 20 3 -9.43 0.00
 22 20 4 4.11 0.00
 22 22 0 -8.16 0.00
 22 22 1 -0.88 0.00
 23 1 0 1.45 0.00
 23 1 1 -7.20 0.00
 23 1 2 -1.83 0.00
 23 1 3 8.73 0.00
 23 1 4 17.16 0.00
 23 1 5 -1.41 0.00
 23 1 6 -4.18 0.00
 23 3 0 4.54 0.00
 23 3 1 -5.50 0.00
 23 3 2 -1.20 0.00
 23 3 3 9.06 0.00
 23 3 4 9.73 0.00
 23 3 5 -14.04 0.00
 23 5 0 8.34 0.00
 23 5 1 -0.35 0.00
 23 5 2 -2.91 0.00
 23 5 3 6.00 0.00
 23 5 4 0.97 0.00
 23 7 0 -0.32 0.00
 23 7 1 1.94 0.00
 23 7 2 9.67 0.00
 23 7 3 4.41 0.00
 23 7 4 2.53 0.00
 23 9 0 -2.82 0.00
 23 9 1 -2.23 0.00
 23 9 2 0.05 0.00
 23 9 3 0.96 0.00
 23 9 4 -0.72 0.00
 23 9 6 -2.68 0.00
 23 11 0 -6.96 0.00
 23 11 1 -1.44 0.00
 23 11 2 0.19 0.00
 23 11 3 -1.33 0.00
 23 11 4 0.50 0.00
 23 11 5 -4.91 0.00
 23 11 6 -2.22 0.00
 23 13 0 -7.65 0.00
 23 13 1 11.09 0.00
 23 13 2 -9.79 0.00
 23 13 3 6.74 0.00
 23 13 4 -9.35 0.00
 23 13 5 1.62 0.00
 23 13 6 -0.96 0.00
 23 15 0 -5.30 0.00
 23 15 1 -2.95 0.00
 23 15 2 -0.59 0.00
 23 15 3 -3.56 0.00
 23 15 4 11.85 0.00
 23 15 5 -5.91 0.00
 23 17 0 13.49 0.00
 23 17 1 -3.25 0.00
 23 17 2 -0.47 0.00
 23 17 3 -7.48 0.00
 24 0 0 5.34 0.00
 24 0 1 2.46 0.00
 24 0 2 -3.41 0.00
 24 2 0 -10.28 0.00
 24 2 1 -11.13 0.00
 24 2 2 1.62 0.00
 24 2 3 4.24 0.00
 24 4 0 -4.04 0.00
 24 4 1 -12.69 0.00
 24 4 2 -0.53 0.00
 24 4 3 -8.90 0.00
 24 4 4 -1.40 0.00
 24 6 0 -3.03 0.00
 24 6 1 -0.18 0.00
 24 6 2 1.42 0.00
 24 6 3 7.25 0.00
 24 6 4 0.57 0.00
 24 8 0 -7.87 0.00
 24 8 1 1.66 0.00
 24 8 2 0.61 0.00
 24 8 3 13.94 0.00
 24 8 4 5.92 0.00
 24 10 0 0.53 0.00
 24 10 1 10.05 0.00
 24 10 2 -2.63 0.00
 24 10 3 10.31 0.00
 24 12 0 -4.71 0.00
 24 12 1 -15.26 0.00
 24 12 2 4.80 0.00
 2 0 0 251.09 0.00
 4 0 0 467.16 0.00
 10 0 0 163.84 0.00
 1 1 0 -233.92 0.00
 3 1 0 116.12 0.00
 0 2 0 338.16 0.00
 10 2 0 108.77 0.00
 10 4 0 22.11 0.00
 10 6 0 5.87 0.00
 24 14 0 10.12 0.00
 24 16 0 7.57 0.00
 24 18 0 -3.19 0.00
 23 19 0 -9.66 0.00
 24 20 0 0.40 0.00
 1 21 0 4.34 0.00
 23 21 0 28.09 0.00
 24 22 0 -9.02 0.00
 23 23 0 -11.26 0.00
 22 24 0 15.64 0.00
 24 24 0 -1.33 0.00
 21 25 0 14.44 0.00
 23 25 0 -8.13 0.00
 22 26 0 24.07 0.00
 24 26 0 -13.80 0.00
 21 27 0 5.86 0.00
 23 27 0 -19.41 0.00
 20 28 0 -23.00 0.00
 22 28 0 27.13 0.00
 19 29 0 35.41 0.00
 21 29 0 0.33 0.00
 23 29 0 5.72 0.00
 20 30 0 -23.40 0.00
 22 30 0 8.15 0.00
 19 31 0 25.42 0.00
 21 31 0 -28.01 0.00
 18 32 0 3.49 0.00
 20 32 0 1.95 0.00
 22 32 0 10.17 0.00
 19 33 0 33.94 0.00
 21 33 0 -4.49 0.00
 18 34 0 -20.62 0.00
 20 34 0 -13.04 0.00
 17 35 0 -11.09 0.00
 19 35 0 8.42 0.00
 21 35 0 2.78 0.00
 18 36 0 11.25 0.00
 20 36 0 0.76 0.00
 17 37 0 -6.23 0.00
 19 37 0 -16.11 0.00
 16 38 0 -17.74 0.00
 18 38 0 10.52 0.00
 20 38 0 -4.61 0.00
 17 39 0 11.82 0.00
 19 39 0 -7.74 0.00
 16 40 0 -5.03 0.00
 18 40 0 5.31 0.00
 15 41 0 -4.10 0.00
 17 41 0 1.24 0.00
 14 42 0 -9.65 0.00
 16 42 0 -2.75 0.00
 13 43 0 -13.50 0.00
 15 43 0 -7.36 0.00
 17 43 0 -6.88 0.00
 12 44 0 27.44 0.00
 14 44 0 8.91 0.00
 16 44 0 11.17 0.00
 9 45 0 0.55 0.00
 11 45 0 2.36 0.00
 13 45 0 4.18 0.00
 15 45 0 -0.87 0.00
 8 46 0 -3.18 0.00
 10 46 0 -4.46 0.00
 12 46 0 2.40 0.00
 14 46 0 -10.66 0.00
 7 47 0 11.00 0.00
 9 47 0 5.01 0.00
 11 47 0 -0.21 0.00
 13 47 0 0.32 0.00
 6 48 0 -3.83 0.00
 8 48 0 -1.31 0.00
 10 48 0 7.36 0.00
 12 48 0 17.41 0.00
 3 49 0 -2.72 0.00
 5 49 0 -14.47 0.00
 7 49 0 6.45 0.00
 9 49 0 -6.28 0.00
 11 49 0 -2.26 0.00
 0 0 1 -25.62 0.00
 10 0 1 -68.36 0.00
 1 1 1 312.69 0.00
 0 2 1 -116.80 0.00
 10 2 1 -68.80 0.00
 10 4 1 -3.34 0.00
 24 14 1 6.46 0.00
 24 16 1 -3.17 0.00
 24 18 1 13.66 0.00
 23 19 1 -2.59 0.00
 24 20 1 5.35 0.00
 23 21 1 -3.61 0.00
 24 22 1 4.22 0.00
 23 23 1 -6.42 0.00
 22 24 1 -4.52 0.00
 24 24 1 -0.50 0.00
 21 25 1 24.13 0.00
 23 25 1 3.82 0.00
 22 26 1 1.93 0.00
 24 26 1 -3.46 0.00
 21 27 1 -2.46 0.00
 23 27 1 -4.09 0.00
 20 28 1 -15.62 0.00
 22 28 1 7.47 0.00
 19 29 1 15.80 0.00
 21 29 1 12.25 0.00
 23 29 1 12.69 0.00
 20 30 1 -4.63 0.00
 22 30 1 0.88 0.00
 19 31 1 -19.83 0.00
 21 31 1 -24.08 0.00
 20 32 1 18.25 0.00
 22 32 1 -8.31 0.00
 19 33 1 9.84 0.00
 21 33 1 -1.38 0.00
 18 34 1 -30.21 0.00
 20 34 1 18.60 0.00
 19 35 1 -4.58 0.00
 21 35 1 -2.87 0.00
 18 36 1 -12.33 0.00
 20 36 1 12.15 0.00
 17 37 1 3.05 0.00
 19 37 1 -7.73 0.00
 18 38 1 -7.75 0.00
 17 39 1 17.33 0.00
 19 39 1 3.83 0.00
 16 40 1 -1.07 0.00
 18 40 1 4.42 0.00
 15 41 1 -11.68 0.00
 17 41 1 1.55 0.00
 14 42 1 -1.02 0.00
 16 42 1 -10.49 0.00
 13 43 1 2.98 0.00
 15 43 1 4.29 0.00
 17 43 1 6.14 0.00
 12 44 1 -10.77 0.00
 14 44 1 -1.43 0.00
 16 44 1 -4.88 0.00
 9 45 1 10.56 0.00
 11 45 1 0.38 0.00
 13 45 1 11.48 0.00
 15 45 1 -5.32 0.00
 8 46 1 2.36 0.00
 10 46 1 9.68 0.00
 12 46 1 4.45 0.00
 14 46 1 10.17 0.00
 7 47 1 -10.76 0.00
 9 47 1 10.98 0.00
 11 47 1 -6.15 0.00
 13 47 1 13.53 0.00
 6 48 1 -3.17 0.00
 8 48 1 0.30 0.00
 10 48 1 4.12 0.00
 12 48 1 -4.62 0.00
 5 49 1 14.65 0.00
 7 49 1 -4.11 0.00
 9 49 1 3.82 0.00
 11 49 1 -3.70 0.00
 10 0 2 43.27 0.00
 10 2 2 50.07 0.00
 10 4 2 6.99 0.00
 24 14 2 -0.81 0.00
 24 16 2 1.74 0.00
 24 18 2 -7.31 0.00
 23 19 2 -2.54 0.00
 24 20 2 -7.20 0.00
 23 21 2 13.40 0.00
 22 22 2 -3.78 0.00
 24 22 2 3.31 0.00
 23 23 2 11.10 0.00
 22 24 2 -8.62 0.00
 24 24 2 -0.71 0.00
 21 25 2 6.82 0.00
 23 25 2 -6.30 0.00
 22 26 2 9.42 0.00
 24 26 2 -1.60 0.00
 21 27 2 19.01 0.00
 23 27 2 -0.98 0.00
 20 28 2 -19.07 0.00
 22 28 2 1.73 0.00
 21 29 2 -12.17 0.00
 23 29 2 -0.81 0.00
 20 30 2 -7.78 0.00
 22 30 2 3.63 0.00
 19 31 2 18.33 0.00
 21 31 2 -9.53 0.00
 20 32 2 -1.76 0.00
 22 32 2 -1.43 0.00
 19 33 2 5.93 0.00
 21 33 2 -10.78 0.00
 20 34 2 -2.45 0.00
 19 35 2 9.54 0.00
 21 35 2 9.82 0.00
 18 36 2 8.12 0.00
 20 36 2 0.84 0.00
 17 37 2 -13.26 0.00
 19 37 2 -19.38 0.00
 18 38 2 15.86 0.00
 17 39 2 7.99 0.00
 19 39 2 -1.09 0.00
 16 40 2 -9.27 0.00
 18 40 2 1.34 0.00
 15 41 2 -0.24 0.00
 17 41 2 -2.44 0.00
 14 42 2 -8.04 0.00
 16 42 2 5.00 0.00
 13 43 2 4.91 0.00
 15 43 2 9.42 0.00
 17 43 2 -1.27 0.00
 12 44 2 0.02 0.00
 14 44 2 -9.80 0.00
 16 44 2 4.22 0.00
 11 45 2 10.52 0.00
 13 45 2 7.49 0.00
 15 45 2 2.28 0.00
 10 46 2 -4.12 0.00
 12 46 2 -1.67 0.00
 14 46 2 -6.38 0.00
 9 47 2 1.30 0.00
 11 47 2 0.19 0.00
 13 47 2 -0.57 0.00
 8 48 2 -3.21 0.00
 10 48 2 -2.85 0.00
 12 48 2 1.81 0.00
 5 49 2 -3.08 0.00
 7 49 2 7.19 0.00
 9 49 2 -1.59 0.00
 11 49 2 -0.64 0.00
 24 0 3 14.39 0.00
 24 12 3 -3.07 0.00
 24 14 3 -2.07 0.00
 24 16 3 1.02 0.00
 24 18 3 3.51 0.00
 23 19 3 4.96 0.00
 24 20 3 -10.41 0.00
 23 21 3 -0.86 0.00
 22 22 3 11.84 0.00
 24 22 3 4.51 0.00
 23 23 3 3.28 0.00
 22 24 3 -1.91 0.00
 24 24 3 -4.59 0.00
 21 25 3 -7.19 0.00
 23 25 3 -6.39 0.00
 22 26 3 18.27 0.00
 24 26 3 1.63 0.00
 21 27 3 -6.13 0.00
 23 27 3 0.20 0.00
 20 28 3 -26.60 0.00
 22 28 3 10.13 0.00
 21 29 3 -10.24 0.00
 23 29 3 -7.92 0.00
 20 30 3 -14.08 0.00
 22 30 3 11.28 0.00
 19 31 3 -7.78 0.00
 21 31 3 -0.95 0.00
 20 32 3 -2.24 0.00
 22 32 3 -4.69 0.00
 19 33 3 0.18 0.00
 21 33 3 1.63 0.00
 18 34 3 -21.99 0.00
 20 34 3 8.11 0.00
 19 35 3 -3.33 0.00
 21 35 3 5.40 0.00
 18 36 3 -7.21 0.00
 20 36 3 5.10 0.00
 17 37 3 11.89 0.00
 19 37 3 -2.58 0.00
 16 38 3 -7.85 0.00
 18 38 3 3.27 0.00
 17 39 3 1.32 0.00
 19 39 3 -1.62 0.00
 16 40 3 -7.26 0.00
 18 40 3 0.50 0.00
 15 41 3 3.07 0.00
 17 41 3 3.12 0.00
 14 42 3 3.51 0.00
 16 42 3 -4.91 0.00
 13 43 3 -20.94 0.00
 15 43 3 5.42 0.00
 12 44 3 4.59 0.00
 14 44 3 3.61 0.00
 16 44 3 1.79 0.00
 11 45 3 -7.09 0.00
 13 45 3 -8.78 0.00
 15 45 3 1.78 0.00
 10 46 3 -2.35 0.00
 12 46 3 1.61 0.00
 14 46 3 3.01 0.00
 9 47 3 3.39 0.00
 11 47 3 -6.32 0.00
 13 47 3 3.21 0.00
 8 48 3 -5.46 0.00
 10 48 3 0.36 0.00
 12 48 3 -5.41 0.00
 5 49 3 3.86 0.00
 7 49 3 2.15 0.00
 9 49 3 0.16 0.00
 11 49 3 -2.77 0.00
 24 0 4 1.81 0.00
 24 2 4 6.29 0.00
 24 10 4 0.83 0.00
 24 12 4 7.81 0.00
 24 14 4 0.55 0.00
 24 16 4 -1.84 0.00
 23 17 4 -5.77 0.00
 24 18 4 -5.92 0.00
 23 19 4 -8.68 0.00
 24 20 4 0.58 0.00
 23 21 4 -8.27 0.00
 22 22 4 -11.58 0.00
 24 22 4 6.62 0.00
 23 23 4 1.80 0.00
 22 24 4 -7.90 0.00
 24 24 4 13.46 0.00
 21 25 4 8.83 0.00
 23 25 4 -6.01 0.00
 22 26 4 -19.41 0.00
 21 27 4 12.04 0.00
 23 27 4 -1.40 0.00
 20 28 4 1.06 0.00
 22 28 4 -8.80 0.00
 21 29 4 -0.80 0.00
 20 30 4 -3.67 0.00
 22 30 4 -14.61 0.00
 19 31 4 -6.15 0.00
 21 31 4 -13.67 0.00
 20 32 4 19.09 0.00
 19 33 4 -1.31 0.00
 21 33 4 -1.56 0.00
 18 34 4 -12.63 0.00
 20 34 4 2.11 0.00
 19 35 4 -4.19 0.00
 18 36 4 8.19 0.00
 20 36 4 3.11 0.00
 17 37 4 13.44 0.00
 19 37 4 -3.06 0.00
 16 38 4 -8.16 0.00
 18 38 4 8.98 0.00
 15 39 4 -15.89 0.00
 17 39 4 1.34 0.00
 16 40 4 -13.66 0.00
 18 40 4 -2.08 0.00
 15 41 4 -6.22 0.00
 17 41 4 0.10 0.00
 14 42 4 -2.14 0.00
 16 42 4 4.97 0.00
 13 43 4 10.00 0.00
 15 43 4 1.11 0.00
 12 44 4 -10.78 0.00
 14 44 4 -7.04 0.00
 16 44 4 7.04 0.00
 9 45 4 -13.84 0.00
 11 45 4 -2.78 0.00
 13 45 4 4.17 0.00
 15 45 4 -3.86 0.00
 10 46 4 0.85 0.00
 12 46 4 -5.95 0.00
 14 46 4 -6.53 0.00
 7 47 4 -1.17 0.00
 9 47 4 -11.71 0.00
 11 47 4 -7.27 0.00
 13 47 4 -6.55 0.00
 6 48 4 3.05 0.00
 8 48 4 -1.70 0.00
 10 48 4 -4.32 0.00
 12 48 4 3.69 0.00
 1 49 4 -4.58 0.00
 3 49 4 4.53 0.00
 5 49 4 -7.62 0.00
 7 49 4 2.22 0.00
 9 49 4 -5.98 0.00
 11 49 4 0.52 0.00
 22 0 5 10.85 0.00
 24 0 5 11.65 0.00
 24 2 5 6.41 0.00
 24 4 5 -10.46 0.00
 23 5 5 4.20 0.00
 24 6 5 -14.37 0.00
 23 7 5 -1.59 0.00
 24 8 5 -2.51 0.00
 23 9 5 -1.22 0.00
 24 10 5 -4.21 0.00
 24 12 5 -4.28 0.00
 24 14 5 -0.35 0.00
 24 16 5 10.32 0.00
 23 17 5 -6.81 0.00
 24 18 5 0.03 0.00
 23 19 5 0.27 0.00
 22 20 5 -7.65 0.00
 24 20 5 -4.76 0.00
 23 21 5 2.20 0.00
 22 22 5 -9.24 0.00
 24 22 5 -4.92 0.00
 21 23 5 0.70 0.00
 23 23 5 -1.17 0.00
 22 24 5 -1.41 0.00
 24 24 5 2.51 0.00
 21 25 5 -0.57 0.00
 23 25 5 1.02 0.00
 20 26 5 4.71 0.00
 22 26 5 1.49 0.00
 21 27 5 -13.02 0.00
 23 27 5 -1.08 0.00
 20 28 5 -8.28 0.00
 22 28 5 7.88 0.00
 19 29 5 9.38 0.00
 21 29 5 -4.66 0.00
 20 30 5 -13.97 0.00
 22 30 5 4.44 0.00
 19 31 5 1.72 0.00
 21 31 5 -2.74 0.00
 18 32 5 -0.70 0.00
 20 32 5 -5.12 0.00
 19 33 5 12.50 0.00
 21 33 5 5.80 0.00
 18 34 5 -12.91 0.00
 20 34 5 -1.36 0.00
 17 35 5 7.26 0.00
 19 35 5 6.51 0.00
 18 36 5 2.06 0.00
 20 36 5 2.04 0.00
 17 37 5 -6.40 0.00
 19 37 5 -1.75 0.00
 16 38 5 1.77 0.00
 18 38 5 14.61 0.00
 15 39 5 -3.62 0.00
 17 39 5 -9.78 0.00
 14 40 5 -7.83 0.00
 16 40 5 -9.72 0.00
 18 40 5 6.12 0.00
 13 41 5 -9.91 0.00
 15 41 5 13.45 0.00
 17 41 5 -4.92 0.00
 14 42 5 2.65 0.00
 16 42 5 -10.82 0.00
 11 43 5 7.79 0.00
 13 43 5 -18.09 0.00
 15 43 5 15.25 0.00
 10 44 5 -7.07 0.00
 12 44 5 1.50 0.00
 14 44 5 6.28 0.00
 9 45 5 -11.09 0.00
 11 45 5 2.43 0.00
 13 45 5 -11.62 0.00
 8 46 5 -5.44 0.00
 10 46 5 -9.31 0.00
 12 46 5 -5.61 0.00
 14 46 5 -1.74 0.00
 7 47 5 10.57 0.00
 9 47 5 -5.66 0.00
 11 47 5 5.54 0.00
 13 47 5 1.34 0.00
 4 48 5 -2.81 0.00
 6 48 5 -6.77 0.00
 8 48 5 -6.19 0.00
 10 48 5 -1.80 0.00
 12 48 5 -1.07 0.00
 1 49 5 -0.12 0.00
 3 49 5 4.73 0.00
 5 49 5 4.94 0.00
 7 49 5 12.49 0.00
 9 49 5 -3.50 0.00
 11 49 5 3.03 0.00
 24 0 6 -16.69 0.00
 24 2 6 -5.76 0.00
 23 3 6 -8.32 0.00
 24 4 6 -7.11 0.00
 23 5 6 -16.98 0.00
 24 6 6 -1.71 0.00
 23 7 6 -16.58 0.00
 24 8 6 4.32 0.00
 24 10 6 -6.32 0.00
 24 12 6 1.86 0.00
 24 14 6 3.02 0.00
 23 15 6 13.13 0.00
 24 16 6 -8.02 0.00
 23 17 6 12.22 0.00
 24 18 6 -4.85 0.00
 23 19 6 -4.22 0.00
 22 20 6 3.31 0.00
 24 20 6 -6.67 0.00
 23 21 6 0.27 0.00
 22 22 6 -0.81 0.00
 24 22 6 0.04 0.00
 21 23 6 4.21 0.00
 23 23 6 -4.98 0.00
 22 24 6 -0.84 0.00
 21 25 6 6.19 0.00
 23 25 6 -4.06 0.00
 20 26 6 6.01 0.00
 22 26 6 -0.32 0.00
 21 27 6 1.10 0.00
 20 28 6 1.11 0.00
 22 28 6 -8.30 0.00
 19 29 6 4.06 0.00
 21 29 6 -5.73 0.00
 12 30 6 11.10 0.00
 20 30 6 10.95 0.00
 22 30 6 -5.40 0.00
 19 31 6 1.98 0.00
 21 31 6 -9.11 0.00
 18 32 6 1.62 0.00
 20 32 6 7.44 0.00
 19 33 6 1.19 0.00
 18 34 6 1.40 0.00
 20 34 6 9.26 0.00
 17 35 6 7.15 0.00
 19 35 6 -1.32 0.00
 16 36 6 -10.34 0.00
 18 36 6 2.85 0.00
 17 37 6 13.25 0.00
 19 37 6 -6.39 0.00
 16 38 6 -6.30 0.00
 18 38 6 9.39 0.00
 15 39 6 -9.90 0.00
 17 39 6 7.17 0.00
 14 40 6 8.79 0.00
 16 40 6 -10.95 0.00
 13 41 6 4.15 0.00
 15 41 6 2.49 0.00
 17 41 6 6.35 0.00
 12 42 6 -10.49 0.00
 14 42 6 8.25 0.00
 16 42 6 1.00 0.00
 11 43 6 2.38 0.00
 13 43 6 4.40 0.00
 15 43 6 2.30 0.00
 10 44 6 10.99 0.00
 12 44 6 2.32 0.00
 14 44 6 9.34 0.00
 9 45 6 -11.66 0.00
 11 45 6 1.76 0.00
 13 45 6 0.43 0.00
 8 46 6 0.37 0.00
 10 46 6 -7.29 0.00
 12 46 6 -11.75 0.00
 5 47 6 3.55 0.00
 7 47 6 14.92 0.00
 9 47 6 5.59 0.00
 11 47 6 7.65 0.00
 0 48 6 1.25 0.00
 2 48 6 9.35 0.00
 4 48 6 5.91 0.00
 6 48 6 6.31 0.00
 8 48 6 -4.83 0.00
 10 48 6 -6.79 0.00
 1 49 6 -2.43 0.00
 3 49 6 0.86 0.00
 5 49 6 -10.97 0.00
 7 49 6 -2.20 0.00
 9 49 6 -7.13 0.00
 24 0 7 -9.25 0.00
 23 1 7 -2.57 0.00
 24 2 7 -5.76 0.00
 23 3 7 -8.52 0.00
 24 4 7 -13.98 0.00
 23 5 7 9.74 0.00
 24 6 7 -8.98 0.00
 23 7 7 6.89 0.00
 24 8 7 -0.76 0.00
 23 9 7 -2.21 0.00
 24 10 7 4.09 0.00
 23 11 7 -5.46 0.00
 24 12 7 0.57 0.00
 23 13 7 -1.25 0.00
 24 14 7 0.33 0.00
 23 15 7 2.45 0.00
 24 16 7 2.63 0.00
 23 17 7 -7.12 0.00
 22 18 7 11.63 0.00
 24 18 7 3.16 0.00
 23 19 7 -5.44 0.00
 22 20 7 3.63 0.00
 24 20 7 -6.31 0.00
 21 21 7 2.33 0.00
 23 21 7 -3.18 0.00
 22 22 7 12.00 0.00
 21 23 7 5.19 0.00
 23 23 7 -10.09 0.00
 20 24 7 -8.29 0.00
 22 24 7 0.80 0.00
 21 25 7 1.85 0.00
 23 25 7 -8.05 0.00
 20 26 7 1.84 0.00
 22 26 7 5.06 0.00
 19 27 7 11.24 0.00
 21 27 7 7.19 0.00
 20 28 7 -9.27 0.00
 22 28 7 -5.45 0.00
 19 29 7 -0.40 0.00
 21 29 7 -4.45 0.00
 18 30 7 1.25 0.00
 20 30 7 0.27 0.00
 19 31 7 2.96 0.00
 21 31 7 2.49 0.00
 18 32 7 0.69 0.00
 20 32 7 2.11 0.00
 17 33 7 2.14 0.00
 19 33 7 3.00 0.00
 18 34 7 -5.91 0.00
 20 34 7 8.75 0.00
 17 35 7 14.55 0.00
 19 35 7 4.52 0.00
 16 36 7 -3.32 0.00
 18 36 7 -4.22 0.00
 15 37 7 -3.95 0.00
 17 37 7 -4.07 0.00
 14 38 7 4.17 0.00
 16 38 7 6.84 0.00
 18 38 7 12.71 0.00
 15 39 7 6.26 0.00
 17 39 7 -2.51 0.00
 14 40 7 5.18 0.00
 16 40 7 2.61 0.00
 13 41 7 6.26 0.00
 15 41 7 13.45 0.00
 12 42 7 6.86 0.00
 14 42 7 3.66 0.00
 11 43 7 -1.02 0.00
 13 43 7 -8.63 0.00
 15 43 7 7.81 0.00
 8 44 7 11.79 0.00
 10 44 7 1.51 0.00
 12 44 7 2.22 0.00
 14 44 7 0.95 0.00
 7 45 7 13.70 0.00
 9 45 7 -2.03 0.00
 11 45 7 6.21 0.00
 13 45 7 2.01 0.00
 6 46 7 -4.17 0.00
 8 46 7 2.50 0.00
 10 46 7 -0.41 0.00
 12 46 7 -1.27 0.00
 3 47 7 -5.85 0.00
 5 47 7 -13.61 0.00
 7 47 7 -0.22 0.00
 9 47 7 -17.05 0.00
 11 47 7 -6.24 0.00
 0 48 7 8.29 0.00
 2 48 7 4.89 0.00
 4 48 7 4.13 0.00
 6 48 7 -4.75 0.00
 8 48 7 0.86 0.00
 10 48 7 4.63 0.00
 1 49 7 6.73 0.00
 3 49 7 6.96 0.00
 5 49 7 2.29 0.00
 7 49 7 6.71 0.00
 9 49 7 -3.71 0.00
 24 0 8 3.30 0.00
 23 1 8 -1.37 0.00
 24 2 8 0.72 0.00
 23 3 8 2.68 0.00
 24 4 8 8.08 0.00
 23 5 8 -7.11 0.00
 24 6 8 -0.68 0.00
 23 7 8 -4.45 0.00
 24 8 8 -0.56 0.00
 23 9 8 0.81 0.00
 24 10 8 -12.98 0.00
 23 11 8 1.37 0.00
 24 12 8 -2.05 0.00
 23 13 8 -2.69 0.00
 22 14 8 -4.81 0.00
 24 14 8 7.05 0.00
 23 15 8 4.41 0.00
 22 16 8 -12.95 0.00
 24 16 8 0.28 0.00
 23 17 8 5.41 0.00
 22 18 8 -3.07 0.00
 24 18 8 0.92 0.00
 21 19 8 3.53 0.00
 23 19 8 5.06 0.00
 22 20 8 -3.10 0.00
 21 21 8 8.50 0.00
 23 21 8 2.49 0.00
 22 22 8 -6.53 0.00
 21 23 8 12.10 0.00
 23 23 8 0.61 0.00
 20 24 8 0.79 0.00
 22 24 8 2.58 0.00
 21 25 8 -0.10 0.00
 20 26 8 5.90 0.00
 22 26 8 -1.72 0.00
 19 27 8 -1.76 0.00
 21 27 8 -1.82 0.00
 18 28 8 -11.22 0.00
 20 28 8 9.26 0.00
 19 29 8 -1.72 0.00
 21 29 8 -6.46 0.00
 18 30 8 -1.02 0.00
 20 30 8 7.37 0.00
 17 31 8 -1.74 0.00
 19 31 8 10.48 0.00
 18 32 8 -2.29 0.00
 20 32 8 -0.52 0.00
 17 33 8 -6.73 0.00
 19 33 8 2.19 0.00
 16 34 8 10.05 0.00
 18 34 8 3.19 0.00
 15 35 8 -1.96 0.00
 17 35 8 8.58 0.00
 19 35 8 4.23 0.00
 16 36 8 -0.76 0.00
 18 36 8 -2.10 0.00
 15 37 8 1.81 0.00
 17 37 8 2.81 0.00
 14 38 8 -0.27 0.00
 16 38 8 4.30 0.00
 13 39 8 7.37 0.00
 15 39 8 5.55 0.00
 17 39 8 1.92 0.00
 12 40 8 12.83 0.00
 14 40 8 2.32 0.00
 16 40 8 5.61 0.00
 11 41 8 7.01 0.00
 13 41 8 7.20 0.00
 15 41 8 6.53 0.00
 10 42 8 -1.77 0.00
 12 42 8 1.84 0.00
 14 42 8 -1.17 0.00
 9 43 8 -4.21 0.00
 11 43 8 -2.54 0.00
 13 43 8 -2.17 0.00
 8 44 8 8.75 0.00
 10 44 8 6.38 0.00
 12 44 8 4.67 0.00
 5 45 8 -3.16 0.00
 7 45 8 0.83 0.00
 9 45 8 -5.48 0.00
 11 45 8 3.33 0.00
 13 45 8 -1.91 0.00
 4 46 8 -5.81 0.00
 6 46 8 2.89 0.00
 8 46 8 7.48 0.00
 10 46 8 -6.17 0.00
 12 46 8 -6.11 0.00
 1 47 8 -3.09 0.00
 3 47 8 2.11 0.00
 5 47 8 -8.69 0.00
 7 47 8 1.17 0.00
 9 47 8 -2.30 0.00
 11 47 8 2.27 0.00
 0 48 8 2.16 0.00
 2 48 8 0.53 0.00
 4 48 8 -1.59 0.00
 6 48 8 -0.54 0.00
 8 48 8 -6.78 0.00
 10 48 8 -8.02 0.00
 1 49 8 9.23 0.00
 3 49 8 9.97 0.00
 5 49 8 -6.08 0.00
 7 49 8 1.08 0.00
 22 0 9 12.51 0.00
 24 0 9 6.49 0.00
 23 1 9 -4.72 0.00
 22 2 9 -4.66 0.00
 24 2 9 -6.34 0.00
 23 3 9 -8.23 0.00
 22 4 9 3.36 0.00
 24 4 9 7.25 0.00
 23 5 9 5.14 0.00
 22 6 9 -7.16 0.00
 24 6 9 4.06 0.00
 23 7 9 1.28 0.00
 22 8 9 -6.86 0.00
 24 8 9 5.59 0.00
 23 9 9 -15.20 0.00
 22 10 9 -4.81 0.00
 24 10 9 6.24 0.00
 23 11 9 -6.84 0.00
 22 12 9 -3.32 0.00
 24 12 9 0.27 0.00
 23 13 9 -7.35 0.00
 22 14 9 -2.12 0.00
 24 14 9 -5.90 0.00
 23 15 9 12.79 0.00
 22 16 9 -0.76 0.00
 24 16 9 -5.75 0.00
 21 17 9 -16.53 0.00
 23 17 9 0.12 0.00
 22 18 9 2.98 0.00
 21 19 9 -10.88 0.00
 23 19 9 4.52 0.00
 22 20 9 3.58 0.00
 21 21 9 -1.47 0.00
 23 21 9 5.20 0.00
 20 22 9 -4.12 0.00
 22 22 9 5.43 0.00
 21 23 9 -7.26 0.00
 20 24 9 -3.41 0.00
 22 24 9 5.10 0.00
 19 25 9 10.08 0.00
 21 25 9 3.68 0.00
 20 26 9 -5.26 0.00
 19 27 9 -1.12 0.00
 21 27 9 -1.54 0.00
 18 28 9 1.62 0.00
 20 28 9 3.35 0.00
 17 29 9 6.49 0.00
 19 29 9 -1.99 0.00
 18 30 9 2.55 0.00
 20 30 9 2.28 0.00
 17 31 9 -2.83 0.00
 19 31 9 -5.93 0.00
 16 32 9 6.37 0.00
 18 32 9 4.37 0.00
 15 33 9 7.25 0.00
 17 33 9 6.73 0.00
 19 33 9 4.48 0.00
 16 34 9 6.69 0.00
 18 34 9 -3.49 0.00
 15 35 9 2.37 0.00
 17 35 9 4.60 0.00
 14 36 9 0.41 0.00
 16 36 9 0.58 0.00
 18 36 9 -2.99 0.00
 13 37 9 -6.93 0.00
 15 37 9 -2.51 0.00
 17 37 9 -2.95 0.00
 14 38 9 -1.46 0.00
 16 38 9 0.16 0.00
 13 39 9 9.39 0.00
 15 39 9 3.47 0.00
 12 40 9 1.22 0.00
 14 40 9 3.41 0.00
 11 41 9 8.15 0.00
 13 41 9 9.74 0.00
 15 41 9 -0.11 0.00
 10 42 9 3.79 0.00
 12 42 9 4.85 0.00
 14 42 9 3.88 0.00
 7 43 9 5.83 0.00
 9 43 9 -1.00 0.00
 11 43 9 -3.24 0.00
 13 43 9 -6.23 0.00
 6 44 9 0.88 0.00
 8 44 9 4.67 0.00
 10 44 9 -3.80 0.00
 12 44 9 -5.38 0.00
 3 45 9 1.63 0.00
 5 45 9 -4.25 0.00
 7 45 9 12.44 0.00
 9 45 9 4.52 0.00
 11 45 9 5.97 0.00
 0 46 9 -2.81 0.00
 2 46 9 0.63 0.00
 4 46 9 0.43 0.00
 6 46 9 0.99 0.00
 8 46 9 1.66 0.00
 10 46 9 0.49 0.00
 1 47 9 6.83 0.00
 3 47 9 3.97 0.00
 5 47 9 -2.56 0.00
 7 47 9 4.94 0.00
 9 47 9 -4.86 0.00
 0 48 9 3.43 0.00
 2 48 9 3.48 0.00
 4 48 9 -0.83 0.00
 6 48 9 -6.05 0.00
 8 48 9 -5.55 0.00
 1 49 9 -1.28 0.00
 3 49 9 -0.79 0.00
 5 49 9 0.16 0.00
 7 49 9 4.11 0.00
 22 0 10 1.91 0.00
 24 0 10 -7.32 0.00
 21 1 10 -4.45 0.00
 23 1 10 2.41 0.00
 22 2 10 13.16 0.00
 24 2 10 -5.06 0.00
 23 3 10 7.84 0.00
 22 4 10 2.96 0.00
 24 4 10 -3.28 0.00
 23 5 10 -5.43 0.00
 22 6 10 2.54 0.00
 24 6 10 -3.48 0.00
 23 7 10 1.26 0.00
 22 8 10 -3.74 0.00
 24 8 10 -9.31 0.00
 23 9 10 1.46 0.00
 22 10 10 -3.31 0.00
 24 10 10 -7.09 0.00
 23 11 10 1.66 0.00
 22 12 10 -2.93 0.00
 24 12 10 -2.69 0.00
 21 13 10 2.81 0.00
 23 13 10 -0.66 0.00
 22 14 10 -1.09 0.00
 21 15 10 -5.05 0.00
 23 15 10 -4.25 0.00
 22 16 10 -3.95 0.00
 21 17 10 -6.52 0.00
 23 17 10 -0.70 0.00
 22 18 10 4.13 0.00
 21 19 10 -6.97 0.00
 23 19 10 0.41 0.00
 20 20 10 -10.51 0.00
 22 20 10 5.35 0.00
 21 21 10 2.10 0.00
 20 22 10 -10.90 0.00
 22 22 10 0.88 0.00
 19 23 10 -2.05 0.00
 21 23 10 1.34 0.00
 20 24 10 0.22 0.00
 19 25 10 4.46 0.00
 21 25 10 -0.80 0.00
 18 26 10 -7.66 0.00
 20 26 10 -3.08 0.00
 19 27 10 4.12 0.00
 21 27 10 -3.27 0.00
 18 28 10 -8.86 0.00
 20 28 10 9.48 0.00
 17 29 10 4.43 0.00
 19 29 10 5.22 0.00
 16 30 10 12.25 0.00
 18 30 10 -8.44 0.00
 17 31 10 2.61 0.00
 19 31 10 1.33 0.00
 16 32 10 6.56 0.00
 18 32 10 3.01 0.00
 15 33 10 -2.27 0.00
 17 33 10 10.79 0.00
 14 34 10 7.58 0.00
 16 34 10 -2.52 0.00
 18 34 10 -0.37 0.00
 15 35 10 -11.34 0.00
 17 35 10 6.29 0.00
 14 36 10 4.56 0.00
 16 36 10 -8.86 0.00
 13 37 10 -2.23 0.00
 15 37 10 -0.55 0.00
 12 38 10 5.14 0.00
 14 38 10 -1.00 0.00
 16 38 10 -4.51 0.00
 9 39 10 -11.97 0.00
 11 39 10 -3.64 0.00
 13 39 10 -1.85 0.00
 15 39 10 -1.06 0.00
 8 40 10 -7.87 0.00
 10 40 10 -3.60 0.00
 12 40 10 3.65 0.00
 14 40 10 -4.82 0.00
 7 41 10 9.56 0.00
 9 41 10 5.22 0.00
 11 41 10 4.48 0.00
 13 41 10 -0.68 0.00
 6 42 10 -9.84 0.00
 8 42 10 -8.99 0.00
 10 42 10 2.50 0.00
 12 42 10 8.22 0.00
 5 43 10 4.50 0.00
 7 43 10 11.55 0.00
 9 43 10 2.82 0.00
 11 43 10 -1.18 0.00
 2 44 10 -4.84 0.00
 4 44 10 -4.13 0.00
 6 44 10 -6.68 0.00
 8 44 10 3.41 0.00
 10 44 10 4.07 0.00
 1 45 10 -3.76 0.00
 3 45 10 -5.67 0.00
 5 45 10 0.58 0.00
 7 45 10 1.87 0.00
 9 45 10 0.61 0.00
 0 46 10 13.26 0.00
 2 46 10 14.02 0.00
 4 46 10 7.57 0.00
 6 46 10 4.51 0.00
 8 46 10 4.88 0.00
 1 47 10 -0.34 0.00
 3 47 10 6.86 0.00
 5 47 10 7.78 0.00
 7 47 10 6.21 0.00
 0 48 10 1.49 0.00
 2 48 10 3.13 0.00
 4 48 10 3.47 0.00
 6 48 10 3.39 0.00
 1 49 10 -5.31 0.00
 3 49 10 -2.32 0.00
 5 49 10 -5.79 0.00
 20 0 11 -9.12 0.00
 22 0 11 8.44 0.00
 24 0 11 -13.45 0.00
 21 1 11 0.80 0.00
 23 1 11 7.33 0.00
 22 2 11 9.03 0.00
 24 2 11 -6.86 0.00
 21 3 11 -7.98 0.00
 23 3 11 -0.12 0.00
 22 4 11 2.52 0.00
 24 4 11 -3.48 0.00
 21 5 11 2.60 0.00
 23 5 11 6.26 0.00
 22 6 11 4.22 0.00
 24 6 11 4.58 0.00
 21 7 11 -7.18 0.00
 23 7 11 0.25 0.00
 22 8 11 0.17 0.00
 24 8 11 1.26 0.00
 21 9 11 -3.62 0.00
 23 9 11 -10.86 0.00
 22 10 11 4.82 0.00
 21 11 11 15.80 0.00
 23 11 11 -5.87 0.00
 22 12 11 1.25 0.00
 21 13 11 -1.42 0.00
 23 13 11 -7.65 0.00
 22 14 11 6.13 0.00
 21 15 11 -4.86 0.00
 23 15 11 -0.14 0.00
 20 16 11 -3.01 0.00
 22 16 11 2.65 0.00
 21 17 11 -5.97 0.00
 20 18 11 6.35 0.00
 22 18 11 3.81 0.00
 21 19 11 -7.65 0.00
 20 20 11 0.18 0.00
 22 20 11 -1.95 0.00
 19 21 11 7.65 0.00
 21 21 11 -2.64 0.00
 20 22 11 -1.44 0.00
 19 23 11 11.15 0.00
 21 23 11 -3.32 0.00
 18 24 11 5.90 0.00
 20 24 11 -8.09 0.00
 19 25 11 4.03 0.00
 18 26 11 10.68 0.00
 20 26 11 -0.39 0.00
 17 27 11 4.96 0.00
 19 27 11 -0.44 0.00
 16 28 11 -10.44 0.00
 18 28 11 1.09 0.00
 17 29 11 8.67 0.00
 19 29 11 -7.74 0.00
 16 30 11 -8.21 0.00
 18 30 11 4.62 0.00
 15 31 11 -3.83 0.00
 17 31 11 1.20 0.00
 14 32 11 0.74 0.00
 16 32 11 3.00 0.00
 18 32 11 6.03 0.00
 15 33 11 8.75 0.00
 17 33 11 5.51 0.00
 14 34 11 -10.17 0.00
 16 34 11 -1.77 0.00
 13 35 11 -2.26 0.00
 15 35 11 2.53 0.00
 17 35 11 0.22 0.00
 12 36 11 9.46 0.00
 14 36 11 -0.71 0.00
 16 36 11 -0.68 0.00
 11 37 11 -11.32 0.00
 13 37 11 -13.76 0.00
 15 37 11 -1.65 0.00
 10 38 11 -5.28 0.00
 12 38 11 6.35 0.00
 14 38 11 -5.37 0.00
 9 39 11 1.92 0.00
 11 39 11 0.54 0.00
 13 39 11 5.81 0.00
 8 40 11 -0.95 0.00
 10 40 11 -4.81 0.00
 12 40 11 -2.02 0.00
 14 40 11 -9.11 0.00
 7 41 11 -13.58 0.00
 9 41 11 -6.73 0.00
 11 41 11 -2.05 0.00
 13 41 11 5.28 0.00
 4 42 11 -4.49 0.00
 6 42 11 -4.62 0.00
 8 42 11 2.43 0.00
 10 42 11 2.66 0.00
 12 42 11 4.72 0.00
 1 43 11 -6.74 0.00
 3 43 11 -0.46 0.00
 5 43 11 -4.90 0.00
 7 43 11 -0.84 0.00
 9 43 11 -1.03 0.00
 11 43 11 -0.68 0.00
 0 44 11 7.26 0.00
 2 44 11 0.45 0.00
 4 44 11 2.63 0.00
 6 44 11 4.82 0.00
 8 44 11 7.57 0.00
 10 44 11 -1.49 0.00
 1 45 11 -1.06 0.00
 3 45 11 3.84 0.00
 5 45 11 -8.91 0.00
 7 45 11 -3.19 0.00
 9 45 11 -2.49 0.00
 0 46 11 2.76 0.00
 2 46 11 1.42 0.00
 4 46 11 7.37 0.00
 6 46 11 9.98 0.00
 8 46 11 4.30 0.00
 1 47 11 4.73 0.00
 3 47 11 10.36 0.00
 5 47 11 0.28 0.00
 0 48 11 -7.11 0.00
 2 48 11 -8.24 0.00
 4 48 11 -0.66 0.00
 20 0 12 0.53 0.00
 22 0 12 0.69 0.00
 21 1 12 -0.95 0.00
 23 1 12 -5.52 0.00
 20 2 12 0.33 0.00
 22 2 12 1.17 0.00
 21 3 12 7.01 0.00
 23 3 12 -2.31 0.00
 20 4 12 -5.51 0.00
 22 4 12 -3.41 0.00
 21 5 12 7.26 0.00
 23 5 12 -6.53 0.00
 20 6 12 -3.26 0.00
 22 6 12 -6.58 0.00
 21 7 12 11.07 0.00
 23 7 12 -5.87 0.00
 20 8 12 6.65 0.00
 22 8 12 -8.19 0.00
 21 9 12 6.90 0.00
 23 9 12 2.82 0.00
 20 10 12 6.70 0.00
 22 10 12 -5.04 0.00
 21 11 12 1.36 0.00
 23 11 12 0.13 0.00
 20 12 12 7.45 0.00
 22 12 12 -4.36 0.00
 21 13 12 1.62 0.00
 20 14 12 -1.06 0.00
 22 14 12 -0.85 0.00
 21 15 12 -0.45 0.00
 20 16 12 -0.75 0.00
 22 16 12 2.13 0.00
 19 17 12 13.21 0.00
 21 17 12 1.70 0.00
 20 18 12 -2.52 0.00
 19 19 12 0.27 0.00
 21 19 12 0.33 0.00
 18 20 12 2.91 0.00
 20 20 12 0.01 0.00
 19 21 12 -3.99 0.00
 21 21 12 4.59 0.00
 18 22 12 0.81 0.00
 20 22 12 -0.99 0.00
 19 23 12 -5.58 0.00
 18 24 12 -3.03 0.00
 20 24 12 1.69 0.00
 17 25 12 5.42 0.00
 19 25 12 -1.59 0.00
 16 26 12 0.18 0.00
 18 26 12 -5.42 0.00
 17 27 12 1.17 0.00
 19 27 12 -0.79 0.00
 16 28 12 -1.80 0.00
 18 28 12 -10.72 0.00
 15 29 12 -4.28 0.00
 17 29 12 -9.67 0.00
 16 30 12 9.51 0.00
 18 30 12 0.81 0.00
 15 31 12 9.85 0.00
 17 31 12 -4.84 0.00
 14 32 12 -9.36 0.00
 16 32 12 0.88 0.00
 13 33 12 -6.99 0.00
 15 33 12 -0.55 0.00
 17 33 12 -5.46 0.00
 12 34 12 3.14 0.00
 14 34 12 4.79 0.00
 16 34 12 2.45 0.00
 11 35 12 6.70 0.00
 13 35 12 -4.22 0.00
 15 35 12 -0.36 0.00
 10 36 12 -0.90 0.00
 12 36 12 3.73 0.00
 14 36 12 11.51 0.00
 9 37 12 -3.32 0.00
 11 37 12 2.12 0.00
 13 37 12 -4.78 0.00
 8 38 12 6.52 0.00
 10 38 12 1.52 0.00
 12 38 12 -0.33 0.00
 14 38 12 -4.48 0.00
 7 39 12 -1.18 0.00
 9 39 12 -11.84 0.00
 11 39 12 -0.78 0.00
 13 39 12 3.28 0.00
 6 40 12 -0.33 0.00
 8 40 12 -3.21 0.00
 10 40 12 -4.41 0.00
 12 40 12 0.88 0.00
 3 41 12 -7.54 0.00
 5 41 12 -12.00 0.00
 7 41 12 -1.53 0.00
 9 41 12 -3.83 0.00
 11 41 12 1.17 0.00
 0 42 12 4.39 0.00
 2 42 12 -11.61 0.00
 4 42 12 6.64 0.00
 6 42 12 -8.10 0.00
 8 42 12 -1.54 0.00
 10 42 12 0.11 0.00
 1 43 12 10.70 0.00
 3 43 12 3.93 0.00
 5 43 12 0.68 0.00
 7 43 12 4.42 0.00
 9 43 12 -0.29 0.00
 0 44 12 4.00 0.00
 2 44 12 -6.20 0.00
 4 44 12 0.53 0.00
 6 44 12 -11.47 0.00
 8 44 12 -2.29 0.00
 1 45 12 7.18 0.00
 3 45 12 1.82 0.00
 5 45 12 0.34 0.00
 7 45 12 -1.73 0.00
 0 46 12 -4.24 0.00
 2 46 12 0.05 0.00
 4 46 12 2.74 0.00
 6 46 12 0.48 0.00
 1 47 12 -7.22 0.00
 3 47 12 0.72 0.00
 18 0 13 -27.33 0.00
 20 0 13 -0.72 0.00
 22 0 13 -2.25 0.00
 19 1 13 4.74 0.00
 21 1 13 -3.91 0.00
 20 2 13 7.56 0.00
 22 2 13 -6.88 0.00
 19 3 13 -9.46 0.00
 21 3 13 -2.71 0.00
 20 4 13 6.07 0.00
 22 4 13 -5.60 0.00
 19 5 13 -0.21 0.00
 21 5 13 1.77 0.00
 20 6 13 -4.15 0.00
 22 6 13 -10.47 0.00
 19 7 13 -5.88 0.00
 21 7 13 -6.88 0.00
 20 8 13 14.36 0.00
 22 8 13 2.09 0.00
 19 9 13 0.94 0.00
 21 9 13 -2.73 0.00
 20 10 13 9.30 0.00
 22 10 13 -3.33 0.00
 19 11 13 5.43 0.00
 21 11 13 0.64 0.00
 20 12 13 3.31 0.00
 22 12 13 2.06 0.00
 19 13 13 -3.39 0.00
 21 13 13 -3.75 0.00
 20 14 13 -0.12 0.00
 19 15 13 6.67 0.00
 21 15 13 2.19 0.00
 18 16 13 -3.88 0.00
 20 16 13 0.14 0.00
 19 17 13 -2.96 0.00
 21 17 13 5.92 0.00
 18 18 13 -3.80 0.00
 20 18 13 6.94 0.00
 19 19 13 -2.17 0.00
 18 20 13 -2.22 0.00
 20 20 13 4.99 0.00
 17 21 13 0.20 0.00
 19 21 13 -5.00 0.00
 18 22 13 0.73 0.00
 20 22 13 1.21 0.00
 17 23 13 -6.28 0.00
 19 23 13 2.74 0.00
 16 24 13 5.92 0.00
 18 24 13 4.59 0.00
 17 25 13 -9.75 0.00
 19 25 13 1.84 0.00
 16 26 13 -0.58 0.00
 18 26 13 -1.48 0.00
 15 27 13 1.66 0.00
 17 27 13 2.31 0.00
 14 28 13 2.04 0.00
 16 28 13 -9.03 0.00
 18 28 13 -6.19 0.00
 15 29 13 -2.59 0.00
 17 29 13 1.99 0.00
 14 30 13 5.65 0.00
 16 30 13 -2.30 0.00
 13 31 13 -14.85 0.00
 15 31 13 -10.23 0.00
 17 31 13 -3.02 0.00
 12 32 13 2.34 0.00
 14 32 13 5.71 0.00
 16 32 13 4.12 0.00
 11 33 13 6.69 0.00
 13 33 13 3.47 0.00
 15 33 13 1.62 0.00
 10 34 13 -1.64 0.00
 12 34 13 -8.76 0.00
 14 34 13 -4.20 0.00
 11 35 13 12.21 0.00
 13 35 13 1.45 0.00
 8 36 13 -0.82 0.00
 10 36 13 -0.30 0.00
 12 36 13 5.04 0.00
 14 36 13 5.65 0.00
 7 37 13 -2.26 0.00
 9 37 13 2.41 0.00
 11 37 13 -0.51 0.00
 13 37 13 -3.39 0.00
 6 38 13 6.92 0.00
 8 38 13 -9.07 0.00
 10 38 13 -9.76 0.00
 12 38 13 -2.45 0.00
 5 39 13 9.41 0.00
 7 39 13 3.54 0.00
 9 39 13 10.86 0.00
 11 39 13 2.18 0.00
 0 40 13 -9.69 0.00
 2 40 13 1.81 0.00
 4 40 13 -1.99 0.00
 6 40 13 6.54 0.00
 8 40 13 -4.68 0.00
 10 40 13 1.07 0.00
 1 41 13 9.77 0.00
 3 41 13 -0.92 0.00
 5 41 13 0.91 0.00
 7 41 13 -4.04 0.00
 9 41 13 0.93 0.00
 0 42 13 -6.02 0.00
 2 42 13 1.33 0.00
 4 42 13 -7.57 0.00
 6 42 13 -4.79 0.00
 8 42 13 -6.16 0.00
 1 43 13 -4.41 0.00
 3 43 13 -4.30 0.00
 5 43 13 0.57 0.00
 7 43 13 0.60 0.00
 0 44 13 9.07 0.00
 2 44 13 12.97 0.00
 4 44 13 -0.48 0.00
 6 44 13 -0.89 0.00
 1 45 13 1.17 0.00
 3 45 13 3.58 0.00
 5 45 13 1.52 0.00
 0 46 13 -4.98 0.00
 2 46 13 0.71 0.00
 18 0 14 -3.74 0.00
 20 0 14 -0.84 0.00
 22 0 14 1.05 0.00
 19 1 14 1.78 0.00
 21 1 14 -4.25 0.00
 18 2 14 -1.96 0.00
 20 2 14 -6.80 0.00
 22 2 14 0.29 0.00
 19 3 14 1.07 0.00
 21 3 14 -0.49 0.00
 18 4 14 9.84 0.00
 20 4 14 -2.93 0.00
 22 4 14 4.53 0.00
 19 5 14 -7.19 0.00
 21 5 14 -8.93 0.00
 18 6 14 0.19 0.00
 20 6 14 -6.60 0.00
 19 7 14 2.62 0.00
 21 7 14 2.01 0.00
 18 8 14 3.84 0.00
 20 8 14 1.06 0.00
 19 9 14 3.59 0.00
 21 9 14 -0.22 0.00
 18 10 14 -3.57 0.00
 20 10 14 -6.42 0.00
 19 11 14 18.08 0.00
 21 11 14 3.67 0.00
 18 12 14 8.06 0.00
 20 12 14 -3.69 0.00
 19 13 14 -0.44 0.00
 21 13 14 -6.03 0.00
 18 14 14 2.65 0.00
 20 14 14 -4.70 0.00
 19 15 14 4.80 0.00
 18 16 14 1.18 0.00
 20 16 14 3.94 0.00
 17 17 14 -8.60 0.00
 19 17 14 7.65 0.00
 18 18 14 2.74 0.00
 20 18 14 4.13 0.00
 17 19 14 -10.87 0.00
 19 19 14 4.12 0.00
 16 20 14 -3.32 0.00
 18 20 14 -3.12 0.00
 17 21 14 2.48 0.00
 19 21 14 2.42 0.00
 16 22 14 3.93 0.00
 18 22 14 -1.38 0.00
 15 23 14 -6.33 0.00
 17 23 14 4.85 0.00
 16 24 14 15.50 0.00
 18 24 14 2.50 0.00
 15 25 14 -8.66 0.00
 17 25 14 0.61 0.00
 14 26 14 -1.35 0.00
 16 26 14 2.63 0.00
 15 27 14 -3.94 0.00
 17 27 14 -1.70 0.00
 14 28 14 3.06 0.00
 16 28 14 0.99 0.00
 13 29 14 -4.35 0.00
 15 29 14 -5.71 0.00
 12 30 14 -0.64 0.00
 14 30 14 -1.10 0.00
 16 30 14 -0.20 0.00
 11 31 14 5.97 0.00
 13 31 14 1.39 0.00
 15 31 14 7.82 0.00
 10 32 14 -6.71 0.00
 12 32 14 -0.11 0.00
 14 32 14 -9.36 0.00
 11 33 14 6.30 0.00
 13 33 14 -2.36 0.00
 0 34 14 -4.54 0.00
 10 34 14 -6.93 0.00
 12 34 14 -0.45 0.00
 14 34 14 0.47 0.00
 7 35 14 2.60 0.00
 9 35 14 -1.38 0.00
 11 35 14 1.68 0.00
 13 35 14 -5.23 0.00
 6 36 14 2.96 0.00
 8 36 14 0.82 0.00
 10 36 14 7.19 0.00
 12 36 14 1.09 0.00
 5 37 14 10.43 0.00
 7 37 14 6.38 0.00
 9 37 14 -2.18 0.00
 11 37 14 -3.55 0.00
 0 38 14 12.35 0.00
 2 38 14 3.92 0.00
 4 38 14 -4.43 0.00
 6 38 14 0.66 0.00
 8 38 14 -3.21 0.00
 10 38 14 7.17 0.00
 1 39 14 -5.67 0.00
 3 39 14 1.49 0.00
 5 39 14 9.16 0.00
 7 39 14 3.72 0.00
 9 39 14 -3.18 0.00
 0 40 14 3.79 0.00
 2 40 14 -2.81 0.00
 4 40 14 -1.14 0.00
 6 40 14 2.30 0.00
 8 40 14 -1.72 0.00
 1 41 14 -2.12 0.00
 3 41 14 1.51 0.00
 5 41 14 3.75 0.00
 7 41 14 -0.25 0.00
 0 42 14 5.77 0.00
 2 42 14 -2.73 0.00
 4 42 14 2.13 0.00
 6 42 14 1.64 0.00
 1 43 14 -1.64 0.00
 3 43 14 -2.86 0.00
 5 43 14 -1.73 0.00
 0 44 14 6.74 0.00
 2 44 14 3.22 0.00
 16 0 15 -18.46 0.00
 18 0 15 -5.51 0.00
 20 0 15 -8.53 0.00
 19 1 15 4.78 0.00
 21 1 15 -2.28 0.00
 18 2 15 13.85 0.00
 20 2 15 0.43 0.00
 17 3 15 -4.35 0.00
 19 3 15 -5.02 0.00
 21 3 15 1.37 0.00
 18 4 15 10.24 0.00
 20 4 15 -6.92 0.00
 17 5 15 13.64 0.00
 19 5 15 3.14 0.00
 21 5 15 5.50 0.00
 18 6 15 0.63 0.00
 20 6 15 -12.16 0.00
 17 7 15 3.10 0.00
 19 7 15 -4.83 0.00
 18 8 15 10.63 0.00
 20 8 15 0.70 0.00
 17 9 15 -1.71 0.00
 19 9 15 -2.31 0.00
 18 10 15 5.39 0.00
 20 10 15 4.51 0.00
 17 11 15 4.69 0.00
 19 11 15 3.11 0.00
 18 12 15 0.12 0.00
 20 12 15 -0.83 0.00
 17 13 15 -11.77 0.00
 19 13 15 -2.70 0.00
 18 14 15 6.99 0.00
 20 14 15 -0.32 0.00
 17 15 15 7.98 0.00
 19 15 15 8.82 0.00
 16 16 15 -5.67 0.00
 18 16 15 -1.40 0.00
 17 17 15 2.78 0.00
 19 17 15 -2.43 0.00
 16 18 15 -4.59 0.00
 18 18 15 2.54 0.00
 15 19 15 -10.94 0.00
 17 19 15 3.88 0.00
 19 19 15 -5.02 0.00
 16 20 15 -1.34 0.00
 18 20 15 6.21 0.00
 15 21 15 1.44 0.00
 17 21 15 7.95 0.00
 14 22 15 -1.80 0.00
 16 22 15 -6.06 0.00
 18 22 15 3.34 0.00
 15 23 15 4.93 0.00
 17 23 15 -1.36 0.00
 14 24 15 -2.03 0.00
 16 24 15 1.11 0.00
 13 25 15 -3.62 0.00
 15 25 15 8.82 0.00
 17 25 15 4.25 0.00
 12 26 15 9.25 0.00
 14 26 15 2.16 0.00
 16 26 15 -5.87 0.00
 13 27 15 -3.20 0.00
 15 27 15 1.27 0.00
 12 28 15 0.85 0.00
 14 28 15 -4.80 0.00
 16 28 15 -10.48 0.00
 11 29 15 9.08 0.00
 13 29 15 4.06 0.00
 15 29 15 3.82 0.00
 10 30 15 2.49 0.00
 12 30 15 7.41 0.00
 14 30 15 4.74 0.00
 9 31 15 -7.02 0.00
 11 31 15 -4.70 0.00
 13 31 15 -0.16 0.00
 0 32 15 2.96 0.00
 8 32 15 2.80 0.00
 10 32 15 4.90 0.00
 12 32 15 -1.74 0.00
 14 32 15 -7.05 0.00
 1 33 15 -6.44 0.00
 7 33 15 2.66 0.00
 9 33 15 -1.62 0.00
 11 33 15 0.54 0.00
 13 33 15 1.31 0.00
 6 34 15 3.18 0.00
 8 34 15 0.11 0.00
 10 34 15 0.59 0.00
 12 34 15 -2.77 0.00
 3 35 15 0.08 0.00
 5 35 15 2.96 0.00
 7 35 15 -2.30 0.00
 9 35 15 1.78 0.00
 11 35 15 6.06 0.00
 0 36 15 -1.39 0.00
 2 36 15 0.37 0.00
 4 36 15 2.97 0.00
 6 36 15 8.74 0.00
 8 36 15 6.09 0.00
 10 36 15 0.90 0.00
 1 37 15 0.42 0.00
 3 37 15 1.36 0.00
 5 37 15 1.11 0.00
 7 37 15 -3.70 0.00
 9 37 15 -1.51 0.00
 0 38 15 3.42 0.00
 2 38 15 9.21 0.00
 4 38 15 8.68 0.00
 6 38 15 10.27 0.00
 8 38 15 -3.28 0.00
 1 39 15 1.00 0.00
 3 39 15 0.75 0.00
 5 39 15 -3.32 0.00
 7 39 15 0.75 0.00
 0 40 15 -8.81 0.00
 2 40 15 -0.22 0.00
 4 40 15 4.70 0.00
 6 40 15 10.91 0.00
 1 41 15 3.68 0.00
 3 41 15 0.96 0.00
 5 41 15 -2.62 0.00
 0 42 15 -4.43 0.00
 2 42 15 -0.22 0.00
 18 0 16 -3.35 0.00
 20 0 16 10.54 0.00
 17 1 16 -0.38 0.00
 19 1 16 -2.43 0.00
 18 2 16 -3.73 0.00
 20 2 16 2.86 0.00
 17 3 16 6.35 0.00
 19 3 16 -0.15 0.00
 18 4 16 8.67 0.00
 20 4 16 3.48 0.00
 17 5 16 4.88 0.00
 19 5 16 -4.46 0.00
 18 6 16 -2.05 0.00
 17 7 16 5.77 0.00
 19 7 16 -0.94 0.00
 16 8 16 8.87 0.00
 18 8 16 -0.95 0.00
 17 9 16 -1.67 0.00
 19 9 16 -3.99 0.00
 16 10 16 -3.83 0.00
 18 10 16 -4.04 0.00
 17 11 16 9.63 0.00
 19 11 16 6.59 0.00
 16 12 16 -11.55 0.00
 18 12 16 1.84 0.00
 15 13 16 2.46 0.00
 17 13 16 -0.36 0.00
 19 13 16 0.62 0.00
 16 14 16 -8.76 0.00
 18 14 16 5.40 0.00
 15 15 16 0.68 0.00
 17 15 16 -0.09 0.00
 16 16 16 -7.85 0.00
 18 16 16 -1.76 0.00
 15 17 16 0.01 0.00
 17 17 16 3.66 0.00
 14 18 16 8.52 0.00
 16 18 16 3.00 0.00
 18 18 16 4.22 0.00
 15 19 16 1.64 0.00
 17 19 16 -3.43 0.00
 14 20 16 6.99 0.00
 16 20 16 -5.37 0.00
 13 21 16 -5.87 0.00
 15 21 16 3.88 0.00
 17 21 16 7.60 0.00
 14 22 16 -0.51 0.00
 16 22 16 -0.85 0.00
 13 23 16 -1.08 0.00
 15 23 16 -5.88 0.00
 12 24 16 -1.69 0.00
 14 24 16 4.52 0.00
 16 24 16 11.05 0.00
 11 25 16 3.83 0.00
 13 25 16 6.99 0.00
 15 25 16 -7.02 0.00
 10 26 16 -6.70 0.00
 12 26 16 -10.99 0.00
 14 26 16 -8.80 0.00
 11 27 16 5.76 0.00
 13 27 16 4.42 0.00
 15 27 16 -2.23 0.00
 10 28 16 6.51 0.00
 12 28 16 2.56 0.00
 14 28 16 4.84 0.00
 9 29 16 -4.82 0.00
 11 29 16 8.87 0.00
 13 29 16 -3.58 0.00
 0 30 16 1.57 0.00
 8 30 16 5.71 0.00
 10 30 16 -5.70 0.00
 12 30 16 2.16 0.00
 1 31 16 0.59 0.00
 7 31 16 9.91 0.00
 9 31 16 2.26 0.00
 11 31 16 10.16 0.00
 13 31 16 -1.12 0.00
 0 32 16 3.31 0.00
 2 32 16 -7.18 0.00
 4 32 16 4.74 0.00
 6 32 16 1.53 0.00
 8 32 16 17.67 0.00
 10 32 16 -0.01 0.00
 12 32 16 8.58 0.00
 1 33 16 -1.24 0.00
 3 33 16 -2.22 0.00
 5 33 16 -9.18 0.00
 7 33 16 0.19 0.00
 9 33 16 -1.22 0.00
 11 33 16 5.06 0.00
 0 34 16 2.90 0.00
 2 34 16 -0.29 0.00
 4 34 16 10.36 0.00
 6 34 16 1.21 0.00
 8 34 16 3.84 0.00
 10 34 16 -7.40 0.00
 1 35 16 0.64 0.00
 3 35 16 5.57 0.00
 5 35 16 -0.46 0.00
 7 35 16 2.77 0.00
 9 35 16 2.06 0.00
 0 36 16 3.06 0.00
 2 36 16 3.00 0.00
 4 36 16 4.85 0.00
 6 36 16 3.83 0.00
 8 36 16 5.31 0.00
 1 37 16 2.12 0.00
 3 37 16 5.61 0.00
 5 37 16 5.02 0.00
 7 37 16 0.24 0.00
 0 38 16 -4.17 0.00
 2 38 16 3.46 0.00
 4 38 16 -4.93 0.00
 6 38 16 -0.35 0.00
 1 39 16 2.14 0.00
 3 39 16 2.06 0.00
 5 39 16 6.57 0.00
 0 40 16 -5.72 0.00
 2 40 16 5.80 0.00
 16 0 17 -10.68 0.00
 18 0 17 -3.90 0.00
 15 1 17 11.06 0.00
 17 1 17 -0.11 0.00
 19 1 17 5.63 0.00
 16 2 17 -0.44 0.00
 18 2 17 3.37 0.00
 15 3 17 1.05 0.00
 17 3 17 -4.10 0.00
 16 4 17 1.84 0.00
 18 4 17 5.77 0.00
 15 5 17 13.74 0.00
 17 5 17 12.38 0.00
 16 6 17 -8.51 0.00
 18 6 17 0.76 0.00
 15 7 17 0.77 0.00
 17 7 17 1.52 0.00
 16 8 17 -0.60 0.00
 18 8 17 4.43 0.00
 15 9 17 6.97 0.00
 17 9 17 1.91 0.00
 16 10 17 4.33 0.00
 18 10 17 -0.09 0.00
 15 11 17 -1.81 0.00
 17 11 17 -0.95 0.00
 14 12 17 -0.77 0.00
 16 12 17 8.63 0.00
 18 12 17 -5.41 0.00
 15 13 17 -10.68 0.00
 17 13 17 -4.86 0.00
 14 14 17 -5.03 0.00
 16 14 17 7.22 0.00
 13 15 17 4.46 0.00
 15 15 17 -7.80 0.00
 17 15 17 -3.00 0.00
 14 16 17 0.93 0.00
 16 16 17 0.96 0.00
 13 17 17 11.71 0.00
 15 17 17 6.02 0.00
 17 17 17 2.16 0.00
 12 18 17 -3.96 0.00
 14 18 17 4.56 0.00
 16 18 17 4.76 0.00
 13 19 17 -3.59 0.00
 15 19 17 2.88 0.00
 12 20 17 -3.68 0.00
 14 20 17 -0.03 0.00
 16 20 17 1.18 0.00
 11 21 17 -0.75 0.00
 13 21 17 -5.38 0.00
 15 21 17 7.85 0.00
 12 22 17 -1.89 0.00
 14 22 17 -2.83 0.00
 11 23 17 -2.72 0.00
 13 23 17 2.60 0.00
 15 23 17 10.72 0.00
 10 24 17 3.29 0.00
 12 24 17 -5.87 0.00
 14 24 17 -8.07 0.00
 9 25 17 -3.34 0.00
 11 25 17 -15.04 0.00
 13 25 17 -9.10 0.00
 8 26 17 -3.59 0.00
 10 26 17 1.00 0.00
 12 26 17 1.32 0.00
 7 27 17 2.62 0.00
 9 27 17 5.99 0.00
 11 27 17 -2.80 0.00
 13 27 17 0.00 0.00
 0 28 17 2.40 0.00
 2 28 17 6.74 0.00
 6 28 17 0.55 0.00
 8 28 17 0.91 0.00
 10 28 17 3.85 0.00
 12 28 17 4.12 0.00
 1 29 17 0.99 0.00
 3 29 17 0.27 0.00
 5 29 17 -0.33 0.00
 7 29 17 3.56 0.00
 9 29 17 5.91 0.00
 11 29 17 -1.00 0.00
 0 30 17 -0.79 0.00
 2 30 17 -1.28 0.00
 4 30 17 1.30 0.00
 6 30 17 2.33 0.00
 8 30 17 4.61 0.00
 10 30 17 1.22 0.00
 1 31 17 -4.68 0.00
 3 31 17 6.65 0.00
 5 31 17 6.21 0.00
 7 31 17 8.36 0.00
 9 31 17 3.29 0.00
 11 31 17 -0.95 0.00
 0 32 17 4.55 0.00
 2 32 17 -0.79 0.00
 4 32 17 -3.87 0.00
 6 32 17 -1.50 0.00
 8 32 17 3.43 0.00
 10 32 17 7.69 0.00
 1 33 17 0.42 0.00
 3 33 17 6.39 0.00
 5 33 17 8.84 0.00
 7 33 17 8.59 0.00
 9 33 17 3.70 0.00
 0 34 17 -2.99 0.00
 2 34 17 -4.98 0.00
 4 34 17 0.50 0.00
 6 34 17 1.42 0.00
 8 34 17 2.17 0.00
 1 35 17 -3.67 0.00
 3 35 17 -3.17 0.00
 5 35 17 0.25 0.00
 7 35 17 1.68 0.00
 0 36 17 4.27 0.00
 2 36 17 1.60 0.00
 4 36 17 0.46 0.00
 6 36 17 -4.22 0.00
 1 37 17 -1.94 0.00
 3 37 17 1.42 0.00
 0 38 17 -3.55 0.00
 2 38 17 -0.33 0.00
 14 0 18 -6.30 0.00
 16 0 18 -0.58 0.00
 15 1 18 0.67 0.00
 17 1 18 -1.19 0.00
 14 2 18 -6.42 0.00
 16 2 18 0.98 0.00
 15 3 18 -5.29 0.00
 17 3 18 -1.04 0.00
 14 4 18 -0.12 0.00
 16 4 18 5.76 0.00
 15 5 18 -9.83 0.00
 17 5 18 2.57 0.00
 14 6 18 -1.13 0.00
 16 6 18 3.92 0.00
 13 7 18 4.39 0.00
 15 7 18 -7.78 0.00
 17 7 18 3.30 0.00
 14 8 18 14.90 0.00
 16 8 18 10.86 0.00
 13 9 18 1.41 0.00
 15 9 18 -5.52 0.00
 17 9 18 0.47 0.00
 14 10 18 8.07 0.00
 16 10 18 -1.60 0.00
 13 11 18 -4.60 0.00
 15 11 18 -2.05 0.00
 12 12 18 5.96 0.00
 14 12 18 9.88 0.00
 16 12 18 0.36 0.00
 13 13 18 -3.98 0.00
 15 13 18 1.14 0.00
 12 14 18 -3.25 0.00
 14 14 18 -5.64 0.00
 16 14 18 -8.06 0.00
 11 15 18 -12.45 0.00
 13 15 18 -5.62 0.00
 15 15 18 0.78 0.00
 12 16 18 3.92 0.00
 14 16 18 4.18 0.00
 11 17 18 4.75 0.00
 13 17 18 4.74 0.00
 15 17 18 4.74 0.00
 10 18 18 -1.96 0.00
 12 18 18 0.05 0.00
 14 18 18 1.89 0.00
 11 19 18 -3.32 0.00
 13 19 18 -4.81 0.00
 15 19 18 3.04 0.00
 10 20 18 -3.35 0.00
 12 20 18 -0.54 0.00
 14 20 18 5.87 0.00
 9 21 18 8.49 0.00
 11 21 18 3.87 0.00
 13 21 18 -6.96 0.00
 8 22 18 -0.08 0.00
 10 22 18 4.27 0.00
 12 22 18 0.08 0.00
 7 23 18 2.92 0.00
 9 23 18 1.26 0.00
 11 23 18 -9.00 0.00
 13 23 18 -9.82 0.00
 6 24 18 15.94 0.00
 8 24 18 -5.85 0.00
 10 24 18 -4.26 0.00
 12 24 18 -3.42 0.00
 3 25 18 1.30 0.00
 5 25 18 -1.49 0.00
 7 25 18 1.82 0.00
 9 25 18 6.44 0.00
 11 25 18 3.00 0.00
 0 26 18 -8.17 0.00
 2 26 18 4.09 0.00
 4 26 18 -1.99 0.00
 6 26 18 12.07 0.00
 8 26 18 3.29 0.00
 10 26 18 1.79 0.00
 12 26 18 -2.38 0.00
 1 27 18 6.60 0.00
 3 27 18 5.07 0.00
 5 27 18 4.33 0.00
 7 27 18 3.39 0.00
 9 27 18 -1.53 0.00
 11 27 18 -4.83 0.00
 0 28 18 -4.88 0.00
 2 28 18 0.66 0.00
 4 28 18 5.94 0.00
 6 28 18 0.77 0.00
 8 28 18 1.71 0.00
 10 28 18 0.83 0.00
 1 29 18 1.41 0.00
 3 29 18 -1.89 0.00
 5 29 18 -1.35 0.00
 7 29 18 -0.78 0.00
 9 29 18 -1.56 0.00
 0 30 18 -3.70 0.00
 2 30 18 -7.61 0.00
 4 30 18 7.49 0.00
 6 30 18 1.15 0.00
 8 30 18 6.70 0.00
 1 31 18 2.91 0.00
 3 31 18 2.43 0.00
 5 31 18 4.35 0.00
 7 31 18 7.37 0.00
 0 32 18 2.51 0.00
 2 32 18 -4.96 0.00
 4 32 18 4.80 0.00
 6 32 18 1.51 0.00
 1 33 18 2.73 0.00
 3 33 18 0.46 0.00
 5 33 18 -2.32 0.00
 0 34 18 -6.50 0.00
 2 34 18 -9.09 0.00
 4 34 18 -0.31 0.00
 1 35 18 -4.66 0.00
 3 35 18 -0.87 0.00
 12 0 19 7.15 0.00
 14 0 19 7.04 0.00
 16 0 19 -6.91 0.00
 13 1 19 -3.92 0.00
 15 1 19 -1.41 0.00
 12 2 19 6.22 0.00
 14 2 19 7.02 0.00
 16 2 19 -0.03 0.00
 13 3 19 -7.88 0.00
 15 3 19 -2.46 0.00
 12 4 19 4.88 0.00
 14 4 19 2.17 0.00
 16 4 19 -0.58 0.00
 11 5 19 8.06 0.00
 13 5 19 -5.08 0.00
 15 5 19 5.81 0.00
 12 6 19 4.68 0.00
 14 6 19 -1.71 0.00
 11 7 19 -0.73 0.00
 13 7 19 -5.39 0.00
 15 7 19 5.40 0.00
 12 8 19 0.32 0.00
 14 8 19 -0.62 0.00
 11 9 19 -0.34 0.00
 13 9 19 4.14 0.00
 15 9 19 12.08 0.00
 10 10 19 3.23 0.00
 12 10 19 -0.79 0.00
 14 10 19 -4.27 0.00
 11 11 19 -0.97 0.00
 13 11 19 -0.15 0.00
 15 11 19 2.09 0.00
 10 12 19 -9.20 0.00
 12 12 19 -5.20 0.00
 14 12 19 -6.83 0.00
 9 13 19 -2.27 0.00
 11 13 19 -0.50 0.00
 13 13 19 2.07 0.00
 10 14 19 -1.44 0.00
 12 14 19 1.08 0.00
 14 14 19 -4.43 0.00
 9 15 19 -1.81 0.00
 11 15 19 -3.30 0.00
 13 15 19 4.74 0.00
 8 16 19 1.15 0.00
 10 16 19 -1.75 0.00
 12 16 19 -2.33 0.00
 14 16 19 -0.47 0.00
 9 17 19 1.42 0.00
 11 17 19 2.94 0.00
 13 17 19 5.49 0.00
 8 18 19 7.28 0.00
 10 18 19 5.70 0.00
 12 18 19 1.43 0.00
 7 19 19 -6.22 0.00
 9 19 19 -5.53 0.00
 11 19 19 4.73 0.00
 13 19 19 -2.16 0.00
 6 20 19 1.57 0.00
 8 20 19 4.64 0.00
 10 20 19 -3.15 0.00
 12 20 19 -1.00 0.00
 5 21 19 -2.19 0.00
 7 21 19 5.69 0.00
 9 21 19 -0.66 0.00
 11 21 19 7.01 0.00
 0 22 19 -3.32 0.00
 2 22 19 -2.11 0.00
 4 22 19 1.39 0.00
 6 22 19 -6.27 0.00
 8 22 19 0.26 0.00
 10 22 19 -7.15 0.00
 12 22 19 -2.76 0.00
 1 23 19 9.79 0.00
 3 23 19 6.24 0.00
 5 23 19 4.28 0.00
 7 23 19 3.29 0.00
 9 23 19 -2.11 0.00
 11 23 19 0.54 0.00
 0 24 19 -7.15 0.00
 2 24 19 -5.46 0.00
 4 24 19 -6.29 0.00
 6 24 19 0.31 0.00
 8 24 19 8.52 0.00
 10 24 19 0.36 0.00
 1 25 19 6.33 0.00
 3 25 19 4.81 0.00
 5 25 19 13.50 0.00
 7 25 19 4.57 0.00
 9 25 19 3.84 0.00
 0 26 19 2.22 0.00
 2 26 19 6.55 0.00
 4 26 19 -0.23 0.00
 6 26 19 0.14 0.00
 8 26 19 1.08 0.00
 1 27 19 2.55 0.00
 3 27 19 -1.53 0.00
 5 27 19 9.46 0.00
 7 27 19 2.15 0.00
 9 27 19 3.52 0.00
 0 28 19 -5.84 0.00
 2 28 19 3.78 0.00
 4 28 19 1.00 0.00
 6 28 19 -1.90 0.00
 8 28 19 -2.27 0.00
 1 29 19 -5.50 0.00
 3 29 19 -5.19 0.00
 5 29 19 0.98 0.00
 7 29 19 3.13 0.00
 0 30 19 -0.48 0.00
 2 30 19 2.68 0.00
 4 30 19 -1.38 0.00
 6 30 19 3.05 0.00
 1 31 19 -8.55 0.00
 3 31 19 -2.63 0.00
 5 31 19 -3.65 0.00
 0 32 19 3.85 0.00
 2 32 19 2.37 0.00
 10 0 20 4.71 0.00
 12 0 20 10.69 0.00
 14 0 20 -8.04 0.00
 9 1 20 -5.85 0.00
 11 1 20 1.51 0.00
 13 1 20 -0.50 0.00
 10 2 20 -1.25 0.00
 12 2 20 6.55 0.00
 14 2 20 -7.65 0.00
 9 3 20 -3.48 0.00
 11 3 20 -0.31 0.00
 13 3 20 4.27 0.00
 10 4 20 5.14 0.00
 12 4 20 10.33 0.00
 14 4 20 -6.21 0.00
 9 5 20 -3.66 0.00
 11 5 20 -4.59 0.00
 13 5 20 2.90 0.00
 8 6 20 -10.98 0.00
 10 6 20 0.56 0.00
 12 6 20 3.05 0.00
 14 6 20 -3.59 0.00
 9 7 20 2.08 0.00
 11 7 20 2.61 0.00
 13 7 20 0.95 0.00
 8 8 20 -14.44 0.00
 10 8 20 -1.99 0.00
 12 8 20 -6.31 0.00
 7 9 20 -2.94 0.00
 9 9 20 -0.28 0.00
 11 9 20 2.72 0.00
 13 9 20 -1.85 0.00
 8 10 20 -8.50 0.00
 10 10 20 5.30 0.00
 12 10 20 -4.15 0.00
 7 11 20 12.57 0.00
 9 11 20 4.99 0.00
 11 11 20 0.62 0.00
 13 11 20 -1.64 0.00
 6 12 20 -10.72 0.00
 8 12 20 -9.84 0.00
 10 12 20 -1.52 0.00
 12 12 20 -3.25 0.00
 7 13 20 -4.76 0.00
 9 13 20 -2.63 0.00
 11 13 20 -5.56 0.00
 13 13 20 -4.76 0.00
 6 14 20 -4.37 0.00
 8 14 20 1.07 0.00
 10 14 20 -0.62 0.00
 12 14 20 2.70 0.00
 5 15 20 3.99 0.00
 7 15 20 8.79 0.00
 9 15 20 5.97 0.00
 11 15 20 3.78 0.00
 4 16 20 2.51 0.00
 6 16 20 -9.30 0.00
 8 16 20 -1.18 0.00
 10 16 20 0.41 0.00
 12 16 20 3.40 0.00
 1 17 20 -6.44 0.00
 3 17 20 -0.69 0.00
 5 17 20 -1.25 0.00
 7 17 20 6.83 0.00
 9 17 20 -4.04 0.00
 11 17 20 0.65 0.00
 0 18 20 17.95 0.00
 2 18 20 4.89 0.00
 4 18 20 8.38 0.00
 6 18 20 -3.33 0.00
 8 18 20 6.03 0.00
 10 18 20 6.56 0.00
 1 19 20 -3.45 0.00
 3 19 20 4.60 0.00
 5 19 20 4.84 0.00
 7 19 20 9.42 0.00
 9 19 20 -2.72 0.00
 11 19 20 6.00 0.00
 0 20 20 0.59 0.00
 2 20 20 -5.39 0.00
 4 20 20 -0.98 0.00
 6 20 20 -8.66 0.00
 8 20 20 -2.96 0.00
 10 20 20 3.75 0.00
 1 21 20 -3.50 0.00
 3 21 20 -1.87 0.00
 5 21 20 -2.62 0.00
 7 21 20 0.81 0.00
 9 21 20 -6.83 0.00
 0 22 20 -0.55 0.00
 2 22 20 0.65 0.00
 4 22 20 -3.74 0.00
 6 22 20 1.13 0.00
 8 22 20 -4.90 0.00
 1 23 20 -0.82 0.00
 3 23 20 0.46 0.00
 5 23 20 -3.09 0.00
 7 23 20 1.51 0.00
 0 24 20 6.05 0.00
 2 24 20 10.46 0.00
 4 24 20 -3.29 0.00
 6 24 20 11.33 0.00
 8 24 20 -0.60 0.00
 1 25 20 -0.14 0.00
 3 25 20 3.52 0.00
 5 25 20 -1.95 0.00
 7 25 20 -0.78 0.00
 0 26 20 -2.36 0.00
 2 26 20 6.41 0.00
 4 26 20 -2.13 0.00
 6 26 20 6.84 0.00
 1 27 20 2.82 0.00
 3 27 20 0.37 0.00
 5 27 20 -0.26 0.00
 0 28 20 -7.55 0.00
 2 28 20 -2.27 0.00
 4 28 20 -0.29 0.00
 1 29 20 -2.83 0.00
 0 0 0 0.00 0.00
# SQUEEZE RESULTS (Version = 150216)
# Note: Data are Listed for all Voids in the P1 Unit Cell
# i.e. Centre of Gravity, Solvent Accessible Volume,
# Recovered number of Electrons in the Void and
# Details about the Squeezed Material
;
loop_
  _platon_missing_refln_index_h
  _platon_missing_refln_index_k
  _platon_missing_refln_index_l
  _platon_missing_refln_theta
 2 0 0 4.198
 4 0 0 8.418
 10 0 0 21.469
 1 1 0 2.342
 3 1 0 6.390
 0 2 0 2.086
 10 2 0 21.580
 10 4 0 21.911
 10 6 0 22.453
 1 21 0 22.573
 0 0 1 2.453
 10 0 1 21.622
 1 1 1 3.393
 0 2 1 3.220
 10 2 1 21.733
 10 4 1 22.062
 10 0 2 22.078
 10 2 2 22.187
 10 4 2 22.510

_platon_squeeze_details
;
TITL 18062704 in Cmmm
CELL   21.0637   42.3687   18.0144     90.00     90.00     90.00
SPGR Cmmm
# Solvent Accessible Volume =      6795
# Electrons Found in S.A.V. =      2019
# Note: Atoms in Void as Cxxx and Qxxx all others
C101 1.000 0.448 0.248 !       2.84 eA-3
C102 0.658 0.133-0.002 !       2.37 eA-3
Q103 0.500 0.468 0.367 !       2.17 eA-3
C104 0.221 0.094 0.003 !       2.05 eA-3
C105 0.733 0.102 0.490 !       1.98 eA-3
C106 0.278 0.045 0.405 !       1.97 eA-3
C107 0.500 0.156 0.000 !       1.79 eA-3
C108 0.500 0.070 0.380 !       1.79 eA-3
Q109 0.791 0.445 0.043 !       1.70 eA-3
C110 0.236 0.046 0.143 !       1.60 eA-3
Q111 1.000 0.055 0.267 !       1.58 eA-3
Q112 0.719 0.445 0.407 !       1.57 eA-3
C113 1.000 0.195 0.496 !       1.57 eA-3
C114 0.380 0.117 0.504 !       1.56 eA-3
C115 0.500 0.062 0.317 !       1.50 eA-3
C116 0.270 0.453 0.095 !       1.49 eA-3
Q117 0.500 0.039 0.116 !       1.48 eA-3
C118 0.500 0.185 0.037 !       1.47 eA-3
C119 0.500 0.439 0.190 !       1.45 eA-3
C120 0.841 0.393 0.488 !       1.44 eA-3
C121 0.500 0.113 0.358 !       1.44 eA-3
C122 0.493 0.090 0.373 !       1.42 eA-3
C123 0.453 0.185 0.050 !       1.39 eA-3
C124 0.894 0.483 0.390 !       1.39 eA-3
C125 0.294 0.024 0.279 !       1.39 eA-3
C126 0.118 0.498 0.484 !       1.37 eA-3
Q127 0.597 0.041 0.324 !       1.35 eA-3
C128 0.591 0.188-0.005 !       1.34 eA-3
C129 0.500 0.139 0.426 !       1.27 eA-3
C130 0.500 0.195 0.095 !       1.27 eA-3
Q131 0.231 0.470 0.065 !       1.25 eA-3
C132 0.266 0.394 0.470 !       1.24 eA-3
C133 1.000 0.212 0.202 !       1.22 eA-3
C134 1.000 0.453 0.439 !       1.22 eA-3
C135 1.000 0.336 0.475 !       1.21 eA-3
C136 0.143 0.117 0.001 !       1.21 eA-3
C137 0.264 0.062 0.504 !       1.19 eA-3
C138 1.000 0.277 0.144 !       1.18 eA-3
Q139 0.987 0.484 0.093 !       1.16 eA-3
C140 0.680 0.078-0.003 !       1.16 eA-3
C141 0.782 0.429 0.439 !       1.16 eA-3
C142 0.608 0.030 0.434 !       1.16 eA-3
Q143 0.625 0.009 0.330 !       1.15 eA-3
C144 0.200 0.500 0.500 !       1.15 eA-3
Q145 0.801 0.008 0.251 !       1.15 eA-3
C146 0.440 0.500 0.000 !       1.14 eA-3
Q147 0.600 0.031 0.004 !       1.13 eA-3
Q148 0.355 0.502 0.172 !       1.13 eA-3
Q149 1.000 0.501 0.031 !       1.12 eA-3
C150 1.000 0.241 0.266 !       1.12 eA-3
C151 0.500 0.285 0.287 !       1.10 eA-3
Q152 0.107 0.016 0.501 !       1.08 eA-3
C153 0.264 0.063 0.009 !       1.07 eA-3
C154 1.000 0.223 0.307 !       1.07 eA-3
Q155 1.000 0.470 0.068 !       1.06 eA-3
C156 0.467 0.177 0.070 !       1.05 eA-3
Q157 0.723 0.014 0.097 !       1.05 eA-3
C158 0.590 0.156 0.496 !       1.04 eA-3
C159 0.918 0.203 0.494 !       1.04 eA-3
C160 0.970 0.317 0.471 !       1.04 eA-3
C161 0.448 0.251 0.220 !       1.02 eA-3
C162 0.967 0.210 0.335 !       1.02 eA-3
Q163 0.196 0.503 0.062 !       1.01 eA-3
C164 0.950 0.279 0.120 !       1.01 eA-3
C165 0.486 0.500 0.000 !       1.01 eA-3
C166 1.000 0.462 0.303 !       1.00 eA-3
C167 0.544 0.164 0.508 !       1.00 eA-3
C168 0.467 0.237 0.094 !       1.00 eA-3
Q169 0.795 0.484 0.440 !       0.99 eA-3
C170 0.500 0.300 0.143 !       0.99 eA-3
C171 1.000 0.140 0.032 !       0.99 eA-3
C172 0.812 0.502 0.344 !       0.99 eA-3
C173 0.987 0.258 0.173 !       0.98 eA-3
C174 0.167 0.476 0.355 !       0.98 eA-3
C175 0.765 0.070 0.005 !       0.98 eA-3
C176 0.315 0.094 0.001 !       0.97 eA-3
C177 0.500 0.310 0.179 !       0.97 eA-3
Q178 0.566 0.017 0.328 !       0.96 eA-3
Q179 0.280 0.475 0.281 !       0.96 eA-3
Q180 0.090 0.190 0.435 !       0.96 eA-3
Q181 0.982 0.475 0.263 !       0.95 eA-3
Q182 0.285 0.498 0.281 !       0.94 eA-3
Q183 0.579 0.500 0.156 !       0.94 eA-3
Q184 0.063 0.486 0.259 !       0.94 eA-3
Q185 0.706 0.469 0.468 !       0.93 eA-3
Q186 0.308 0.500 0.469 !       0.92 eA-3
C187 0.491 0.321 0.138 !       0.92 eA-3
Q188 0.824 0.086 0.503 !       0.92 eA-3
C189 0.914 0.281 0.110 !       0.91 eA-3
C190 0.530 0.224 0.472 !       0.89 eA-3
C191 0.081 0.437 0.390 !       0.89 eA-3
C192 1.000 0.269 0.442 !       0.88 eA-3
Q193 0.725 0.498 0.188 !       0.88 eA-3
Q194 0.683 0.039 0.003 !       0.87 eA-3
C195 0.500 0.031 0.507 !       0.87 eA-3
Q196 0.500 0.016-0.006 !       0.86 eA-3
C197 0.828 0.389 0.040 !       0.86 eA-3
Q198 0.136 0.031 0.496 !       0.86 eA-3
Q199 0.546 0.354 0.108 !       0.86 eA-3
;
loop_
  _platon_squeeze_void_nr
  _platon_squeeze_void_average_x
  _platon_squeeze_void_average_y
  _platon_squeeze_void_average_z
  _platon_squeeze_void_volume
  _platon_squeeze_void_count_electrons
  _platon_squeeze_void_content
 1 -0.044 -0.004 -0.064 6816 2031 ' '

_platon_squeeze_void_probe_radius  1.20
loop_
  _refln_index_h
  _refln_index_k
  _refln_index_l
  _refln_F_squared_meas
  _refln_F_squared_sigma
  _refln_scale_group_code
 0 0 -2 256250 2387.9 1
 0 0 -3 157.858 268.965 1
 0 0 -4 182619 2833.66 1
 0 0 -5 24368.3 1231.89 1
 0 0 -6 96906.8 2507.39 1
 0 0 -7 39284.1 1770.57 1
 0 0 -8 102918 3078.34 1
 0 0 -9 661451 7110.03 3
 0 0 -9 694310 8396.26 1
 0 0 -10 10376.2 1162.81 3
 0 0 -11 376859 6103.84 3
 0 0 -12 16483.7 1446.02 3
 0 0 -13 46538.8 2433.53 3
 0 0 -14 1807.72 649.913 3
 0 0 -15 611.123 605.089 3
 0 0 -16 2632.12 816.053 3
 0 0 -17 5555.87 997.112 3
 0 0 -18 32182.1 2035.09 3
 0 0 -19 4083.02 779.321 5
 0 0 -20 15105.6 1124.09 5
 0 2 2 306624 2993.31 1
 0 2 -2 302037 2314.61 1
 0 2 -3 4924.76 422.18 1
 0 2 -4 38571.3 1246.28 1
 0 -2 -5 292331 4067.8 1
 0 2 -5 297268 3757.93 1
 0 2 -6 71636.8 2098.22 1
 0 -2 -6 67489.8 2186.67 1
 0 -2 -7 8346.06 859.255 1
 0 2 -7 8631.66 822.986 1
 0 2 -8 85622.3 2697.03 1
 0 -2 -8 86545.1 2893.95 1
 0 2 -9 399332 6160.23 1
 0 2 -9 388497 5514.52 3
 0 -2 -10 5271.66 885.64 3
 0 2 -10 6646.79 910.311 3
 0 2 -11 335986 5854.8 3
 0 -2 -11 339477 5835.23 3
 0 2 -12 11758.5 1235.73 3
 0 -2 -12 10489.6 1142.74 3
 0 2 -13 36955.3 2190.82 3
 0 -2 -13 35090.4 2160.02 3
 0 2 -14 -44.1363 511.614 3
 0 -2 -14 8465.76 1055.83 3
 0 -2 -15 3510.29 844.74 3
 0 2 -15 4228.36 886.288 3
 0 2 -16 2228.39 763.647 3
 0 -2 -16 1974.14 687.915 3
 0 -2 -17 854.733 618.65 3
 0 2 -17 814.651 616.364 3
 0 -2 -18 22243.2 1690.01 3
 0 2 -18 19206.4 1578.43 3
 0 2 -19 2022.66 573.899 5
 0 -2 -19 3204.98 723.719 5
 0 -2 -20 85407.6 2651.72 5
 0 2 -20 84644.7 2478.57 5
 0 -4 0 677808 2238.22 1
 0 4 1 5065.54 362.168 1
 0 -4 -1 4996.4 341.998 1
 0 -4 -2 526970 3909.55 1
 0 4 -2 516565 2517.38 1
 0 4 -3 2840.41 330.497 1
 0 4 -4 619587 4494.16 1
 0 4 -5 124824 2340.49 1
 0 4 -6 310952 4101.45 1
 0 -4 -6 318593 4839.27 1
 0 -4 -7 13083.8 1157.97 1
 0 4 -7 13783 992.513 1
 0 4 -8 11066.5 975.464 1
 0 -4 -8 10458.4 1089.71 1
 0 4 -9 579569 6688.47 3
 0 4 -9 576594 7124.23 1
 0 4 -10 1836 486.224 3
 0 -4 -10 1949.69 595.895 3
 0 4 -11 61656.6 2276.07 6
 0 4 -11 63914.9 2539.09 3
 0 -4 -11 64179.1 2627.23 3
 0 4 -12 4636.96 864.64 3
 0 -4 -12 4570.63 965.053 3
 0 4 -13 1337.38 682.297 3
 0 -4 -13 1751.44 633.511 3
 0 4 -14 6045.3 1032.09 3
 0 -4 -14 5070.16 872.983 3
 0 4 -15 38500.8 2371.83 3
 0 -4 -15 39580.2 2374.09 3
 0 4 -16 45395.6 2509.04 3
 0 -4 -16 47503.5 2589.41 3
 0 -4 -17 6353.92 1050.07 3
 0 4 -17 6536.2 1013.72 3
 0 -4 -18 609.681 540.069 3
 0 4 -18 20.4249 474.899 3
 0 -4 -19 7303.69 967.756 5
 0 4 -19 7038.44 833.567 5
 0 -4 -20 51964.6 2121.44 5
 0 -6 0 184284 1397.53 1
 0 -6 -1 10532.4 494.408 1
 0 6 -2 88593 751.151 1
 0 -6 -2 95283.8 1753.7 1
 0 6 -3 14831.4 533.275 1
 0 6 -4 292782 2831.65 1
 0 6 -5 340610 3565.55 1
 0 6 -6 81525.5 2007.34 1
 0 -6 -6 80123.9 2525.02 1
 0 -6 -7 107560 3115.95 1
 0 6 -7 112567 2555.15 1
 0 6 -8 5099.67 615.199 1
 0 -6 -8 4944.38 769.724 1
 0 6 -9 275654 4539.64 3
 0 6 -9 255172 4470.06 1
 0 6 -10 8858.02 916.937 3
 0 6 -10 7708.26 917.081 1
 0 -6 -10 8542.66 973.002 3
 0 6 -10 9312.13 938.034 6
 0 6 -11 57931.9 2416.43 3
 0 6 -11 57861.2 2339.99 6
 0 -6 -11 60179.6 2589.2 3
 0 6 -12 8741.73 1115.74 3
 0 -6 -12 7846.73 1002.76 3
 0 6 -12 8331.92 967.755 6
 0 -6 -13 36510.1 2233.21 3
 0 6 -13 36358.4 1920.55 6
 0 6 -13 35616.4 2088.21 3
 0 6 -14 34637.7 2120.01 3
 0 -6 -14 27754 2027.88 3
 0 6 -15 102579 3638.98 3
 0 -6 -15 103734 3740.01 3
 0 6 -16 119062 3917.88 3
 0 -6 -16 114279 3990.35 3
 0 -6 -17 41493.4 2353.67 3
 0 6 -17 38492.6 2203.23 3
 0 -6 -18 18677.8 1514.63 3
 0 -6 -19 1487.06 645.078 5
 0 -6 -20 10528 987.598 5
 0 -8 0 54845.4 853.781 1
 0 -8 -1 4308.4 395.052 1
 0 -8 -2 209206 2666.38 1
 0 8 -3 188367 1345.34 1
 0 -8 -3 185534 2897.25 1
 0 8 -4 16731.4 624.905 1
 0 -8 -4 16450.3 1062.37 1
 0 -8 -5 125288 2941.33 1
 0 8 -5 130358 1998.83 1
 0 8 -6 154051 2511.94 1
 0 -8 -6 157103 3601.35 1
 0 -8 -7 165522 3972.17 1
 0 8 -7 161600 2845.53 1
 0 8 -8 26879.6 1295.5 1
 0 -8 -8 29574.7 1849.83 1
 0 8 -9 1163.08 416.669 3
 0 8 -9 1179.95 348.454 1
 0 8 -9 1367.51 440.616 6
 0 8 -10 1671.67 607.076 3
 0 8 -10 2094 519.85 6
 0 -8 -10 1892.37 548.385 3
 0 8 -11 167898 4100.94 6
 0 8 -11 175131 4193.08 3
 0 -8 -11 171961 4235.1 3
 0 8 -12 375.805 433.052 6
 0 8 -12 493.836 500.066 3
 0 -8 -12 437.552 461 3
 0 8 -13 49408.4 2443.14 3
 0 8 -13 49678.7 2304.06 6
 0 -8 -13 50792.6 2529.95 3
 0 8 -14 68945.8 2921.36 3
 0 8 -14 65004.4 2706.11 6
 0 8 -15 182372 4815.73 3
 0 -8 -15 192385 5065.86 3
 0 -8 -16 154250 4523.49 3
 0 8 -16 156080 4423.68 3
 0 -8 -17 6584.86 1000.12 3
 0 8 -17 7571.02 1018.09 3
 0 -8 -18 1065.58 456.443 3
 0 -8 -19 162.633 431.661 5
 0 -8 -20 7072.73 839.648 5
 0 -10 0 292517 2129.49 1
 0 -10 -1 12952.9 719.841 1
 0 -10 -2 11213.7 680.73 1
 0 -10 -3 14064.6 871.094 1
 0 10 -4 226082 1587.53 1
 0 -10 -4 225234 3687.19 1
 0 10 -5 433282 3037.58 1
 0 -10 -5 389476 5276.54 1
 0 -10 -6 314903 5160.84 1
 0 10 -6 322227 3189.42 1
 0 -10 -7 641906 7915.43 1
 0 10 -7 638938 5171.18 1
 0 10 -8 18260.3 998.398 1
 0 10 -9 33708.2 1789.62 6
 0 10 -9 33393.6 1591.21 3
 0 -10 -10 26685.7 1572.89 3
 0 10 -10 26776 1579.08 3
 0 10 -10 26396.5 1659.1 6
 0 -10 -11 43967.1 2155.15 3
 0 10 -11 41864.7 2032.56 3
 0 10 -11 42581 2180.73 6
 0 10 -12 1566.23 524.073 3
 0 10 -12 1724.53 586.679 6
 0 -10 -12 1347.41 531.926 3
 0 10 -13 48534 2403.65 3
 0 10 -13 46407.1 2330.97 6
 0 -10 -13 51328.8 2544.38 3
 0 10 -14 40747.6 2236.74 3
 0 10 -14 38601.1 2154.94 6
 0 10 -15 161602 4394.72 3
 0 -10 -15 160989 4555.37 3
 0 10 -15 151329 4196.2 6
 0 -10 -16 50795.7 2656.15 3
 0 10 -16 55334.6 2573.08 3
 0 -10 -17 13623.4 1338.54 3
 0 -10 -18 11497.3 1189.82 3
 0 -10 -19 -640.829 516.963 5
 0 -10 -20 1650.09 522.908 5
 0 -12 0 356633 2505.43 1
 0 -12 -1 24319.9 907.123 1
 0 -12 -2 3383.84 483.061 1
 0 -12 -3 38203 1435.74 1
 0 -12 -4 44412.1 1715.91 1
 0 -12 -5 250323 4379.47 1
 0 12 -5 238634 1584.19 1
 0 -12 -6 179513 3965.22 1
 0 12 -6 178632 1903.24 1
 0 12 -7 589230 4168.48 1
 0 -12 -7 582896 7647.74 1
 0 12 -8 1289.99 449.873 6
 0 12 -9 213627 4559.36 6
 0 12 -9 220533 4069.5 3
 0 12 -10 15821.2 1202.81 3
 0 12 -10 14799.4 1340.05 6
 0 -12 -10 13213.2 1126.05 3
 0 -12 -11 69573 2661.13 3
 0 12 -11 69637.8 2625.8 3
 0 12 -11 70329.3 2840.68 6
 0 12 -12 2771.01 685.101 6
 0 12 -12 2722.85 675.615 3
 0 -12 -12 3051.57 676.431 3
 0 12 -13 264.242 393.745 6
 0 -12 -13 1646.03 631.143 3
 0 12 -13 460.015 530.654 3
 0 12 -14 24929.7 1773.69 3
 0 -12 -14 21526 1754.63 3
 0 12 -14 23972.8 1781.41 6
 0 -12 -15 43749.9 2347.81 3
 0 12 -15 44788.3 2348.47 6
 0 12 -15 47012 2388.08 3
 0 -12 -16 56366.4 2683.8 3
 0 12 -16 56964.7 2536.99 6
 0 -12 -17 7996.38 1097.85 3
 0 -12 -18 2230.88 598.184 3
 0 -12 -18 1605.69 645.474 5
 0 -12 -19 43.1378 432.697 5
 0 -12 -20 3703.55 628.331 5
 0 -14 0 465461 2926.77 1
 0 -14 -1 8655.45 648.213 1
 0 -14 -2 80058.6 1896.87 1
 0 -14 -3 1180.4 480.782 1
 0 -14 -4 78291.7 2281.58 1
 0 -14 -5 62381.8 2219.76 1
 0 -14 -6 283965 5042.01 1
 0 14 -7 16725.9 1204.66 6
 0 14 -8 11390.7 1080.54 6
 0 14 -9 96981.8 2685.74 3
 0 -14 -9 92286.1 2706.72 3
 0 14 -9 98169 3176.09 6
 0 14 -10 3311.07 758.222 6
 0 14 -10 3041.68 676.458 3
 0 -14 -10 4436.66 722.98 3
 0 14 -11 81587 3129.78 6
 0 -14 -11 79786 2840.77 3
 0 14 -11 84636.7 2842.88 3
 0 14 -12 6420.36 887.625 3
 0 -14 -12 5333.87 825.09 3
 0 14 -12 6487.07 981.155 6
 0 14 -13 2148.74 663.456 3
 0 -14 -13 1519.33 517.387 3
 0 14 -13 1161.25 461.149 6
 0 14 -14 763.538 525.473 3
 0 14 -14 518.011 462.667 6
 0 -14 -15 47556.4 2401.31 3
 0 14 -15 46389.2 2439.36 6
 0 14 -16 37820.7 2113.14 6
 0 -14 -16 36885.6 2065.96 3
 0 -14 -17 1244.27 464.418 3
 0 -14 -18 1945.22 634.075 5
 0 -14 -19 4520.4 762.354 5
 0 -14 -20 25786.7 1405.7 5
 0 -16 0 279851 2258.23 1
 0 -16 -1 53854.6 1378.72 1
 0 -16 -2 137043 2524.02 1
 0 -16 -3 6683.93 652.583 1
 0 -16 -4 51028.6 1906.78 1
 0 -16 -5 121194 3153.37 1
 0 -16 -6 3439.38 617.557 1
 0 16 -6 3452.28 634.024 6
 0 16 -7 2175.27 544.86 6
 0 16 -8 18037.7 1390 6
 0 16 -9 268136 4406.45 3
 0 -16 -9 258749 4471.96 3
 0 16 -9 256645 5408.63 6
 0 16 -10 7757.81 1057.92 6
 0 16 -10 9196.34 956.088 3
 0 -16 -10 9339.07 953.346 3
 0 -16 -11 201919 4357.95 3
 0 16 -11 196771 4989.23 6
 0 16 -12 1543.61 498.331 3
 0 16 -12 1735.29 550.902 6
 0 -16 -12 2071.56 574.69 3
 0 -16 -13 9246.26 1140.18 3
 0 16 -13 8605.88 999.45 3
 0 16 -13 7467.07 1052.6 6
 0 -16 -14 9985.85 1192.41 3
 0 16 -14 11898.5 1292.85 6
 0 -16 -15 9056.33 1075.54 3
 0 16 -15 9628.77 1152.34 6
 0 16 -16 6434.92 953.927 6
 0 -16 -16 5000.11 779.371 3
 0 16 -17 708.249 440.51 6
 0 -16 -17 1980.73 708.905 5
 0 -16 -17 1479.26 455.488 3
 0 -16 -18 17090.1 1386.07 5
 0 -16 -19 4363.59 739.962 5
 0 -16 -20 76808.1 2296.48 5
 0 -18 0 566055 3116.75 1
 0 -18 -1 2037.25 380.622 1
 0 -18 -2 10700.6 752.621 1
 0 -18 -3 109.869 247.506 1
 0 -18 -4 64007.6 2155.28 1
 0 18 -5 4477.87 651.491 6
 0 -18 -5 4797.09 705.916 1
 0 18 -6 7555.62 876.468 6
 0 18 -6 7066.11 866.365 4
 0 18 -7 16942.5 1308.04 6
 0 18 -8 4097.62 800.11 6
 0 18 -9 237555 5217.87 6
 0 18 -10 4702.33 810.463 3
 0 18 -10 4875.71 1012.59 6
 0 18 -11 70393.9 3065.74 6
 0 -18 -12 5033.96 819.072 3
 0 18 -12 4236.61 934.881 6
 0 18 -13 1238.98 743.265 6
 0 -18 -13 1155.15 543.512 3
 0 -18 -14 11565.9 1163.31 3
 0 18 -14 11262.9 1306.5 6
 0 18 -15 22137 1787.34 6
 0 -18 -15 23028.9 1604.76 3
 0 18 -16 18215 1549.88 6
 0 18 -17 -635.816 523.518 6
 0 -18 -17 -732.301 611.579 5
 0 -18 -18 13898.4 1238.76 5
 0 -18 -19 6684.74 781.147 5
 0 -20 0 493934 2686.11 1
 0 -20 -1 18102.5 793.097 1
 0 -20 -2 1171.69 333.319 1
 0 -20 -3 28811.1 1371.55 1
 0 20 -4 1999.35 563.259 4
 0 20 -4 1520.69 477.995 6
 0 -20 -4 1910.71 427.816 1
 0 -20 -5 43726.6 1973 1
 0 20 -5 47572.1 2035.06 6
 0 20 -5 45159.6 2124.43 4
 0 20 -6 71936.9 2703.93 6
 0 20 -6 71670.8 2819.43 4
 0 20 -7 19373.8 1483.84 6
 0 20 -8 17875.5 1498.52 6
 0 20 -9 145656 4218.3 6
 0 20 -10 10180.4 1240.85 6
 0 20 -11 99093.8 3712.82 6
 0 20 -12 3404.45 721.653 6
 0 20 -13 12578.1 1455.42 6
 0 20 -14 1915.76 699.689 6
 0 20 -15 30979.9 2108.36 6
 0 -20 -16 31416.5 1951.71 5
 0 20 -16 30901.9 1969.9 6
 0 -20 -17 1345.46 603.286 5
 0 20 -17 1269.43 515.509 6
 0 -20 -18 8253.5 910.776 5
 0 -20 -19 1459.03 385.814 5
 0 22 0 537877 6873.85 4
 0 22 -1 11609.1 1078.95 4
 0 22 -2 7728.97 861.206 4
 0 -22 -3 46637 1689.93 1
 0 22 -3 46383.7 1907.66 6
 0 22 -3 44090.1 2075.47 4
 0 22 -4 378175 5697.8 6
 0 -22 -4 366107 5229.82 1
 0 22 -4 359089 5961.26 4
 0 22 -5 74149.6 2865.14 4
 0 22 -5 74795.7 2679.2 6
 0 22 -6 53356.3 2561.17 4
 0 22 -6 54846.8 2389.91 6
 0 22 -7 22046.5 1626.55 6
 0 22 -8 1689.67 623.787 6
 0 22 -9 34869.6 2171.23 6
 0 22 -10 2701.8 705.705 6
 0 22 -11 24904.5 1953.63 6
 0 22 -12 2651.91 829.808 6
 0 22 -13 4141.16 843.044 6
 0 22 -14 14171.8 1540.43 6
 0 22 -15 44213 2453.59 6
 0 -22 -15 44335.5 2332.23 5
 0 -22 -16 20616.9 1570.03 5
 0 22 -16 20999.7 1637.28 6
 0 22 -17 3001.34 646.238 6
 0 -22 -17 2858.33 626.859 5
 0 -22 -18 473.005 330.258 5
 0 24 0 203158 4523.6 4
 0 24 -1 3165.87 690.26 4
 0 24 -2 456.953 332.497 6
 0 24 -2 539.124 389.651 4
 0 24 -3 34731.6 1769.03 6
 0 24 -3 33617.7 1907.36 4
 0 24 -4 302657 5294.19 6
 0 24 -4 305984 5791.08 4
 0 24 -5 259407 5237.01 6
 0 24 -5 252179 5512.34 4
 0 24 -6 100104 3352.45 6
 0 24 -6 95221.5 3571.87 4
 0 24 -7 161915 4370.56 6
 0 24 -8 2440.68 660.579 6
 0 24 -9 35366 2238.48 6
 0 24 -10 227.597 489.416 6
 0 24 -11 3912.49 896.009 6
 0 24 -12 5601.97 1061.25 6
 0 -24 -13 1180.14 659.934 5
 0 24 -13 1486.91 735.001 6
 0 -24 -14 31041.6 1963.85 5
 0 24 -14 31861.6 2155.35 6
 0 24 -15 53618.3 2725.01 6
 0 -24 -15 54573.6 2476.75 5
 0 24 -16 57574.1 2605.86 6
 0 -24 -16 57554.6 2390.67 5
 0 -24 -17 15624.4 1194.91 5
 0 -24 -18 2861.2 518.179 5
 0 26 0 85546.6 3026.4 4
 0 26 1 -68.4047 408.921 4
 0 26 -1 175.457 404.996 4
 0 26 -2 4608.6 687.655 6
 0 26 -2 5522.08 867.749 4
 0 26 -3 36432.4 2075.59 4
 0 26 -3 36568.2 1871.85 6
 0 26 -4 255975 5631.94 4
 0 26 -4 262877 5134.61 6
 0 26 -5 275103 5527.72 6
 0 26 -5 270372 5975.31 4
 0 26 -6 187519 5194.73 4
 0 26 -6 189083 4780.09 6
 0 26 -7 79074.3 3177.59 6
 0 26 -8 601.824 442.65 6
 0 26 -9 11869.2 1367.73 6
 0 26 -10 5513.25 1002.96 6
 0 -26 -10 6652.86 924.228 5
 0 26 -11 3665.74 972.814 6
 0 -26 -11 3159.85 650.161 5
 0 -26 -12 5717.21 930.38 5
 0 26 -12 5366.82 1050.57 6
 0 26 -13 46562.7 2622.71 6
 0 -26 -13 45197.3 2302.67 5
 0 -26 -14 7798.56 994.247 5
 0 26 -14 7366.87 1121.26 6
 0 -26 -15 84647.3 2901.08 5
 0 26 -15 83555.7 3270.49 6
 0 26 -16 61307.5 2627.88 6
 0 -26 -16 56583.2 2239.35 5
 0 -26 -17 8640.17 844.655 5
 0 28 0 53167.3 2473.82 4
 0 28 1 4830.96 899.504 4
 0 28 -1 5236.04 857.403 4
 0 28 -2 1825.18 670.221 4
 0 28 2 1136.51 638.015 4
 0 28 -2 783.428 317.321 6
 0 28 -3 12087.6 1127.02 6
 0 28 -3 11398.8 1245.04 4
 0 28 -4 125285 4106.75 4
 0 28 -4 120983 3660.54 6
 0 28 -5 143904 4582.3 4
 0 28 -5 153310 4255.9 6
 0 28 -6 50860.3 2902.84 4
 0 28 -6 50321.8 2556.93 6
 0 28 -7 35030.3 2199 6
 0 28 -8 1594.82 735.857 6
 0 28 -9 66526.6 3158.29 6
 0 28 -10 1756.67 736.215 6
 0 28 -11 13117.1 1520.01 6
 0 -28 -12 871.837 541.348 5
 0 28 -12 -6.92676 565.669 6
 0 -28 -13 49742.8 2282.82 5
 0 28 -13 47238.7 2628.15 6
 0 28 -14 34474.5 2181.63 6
 0 -28 -14 36160.8 1933.46 5
 0 28 -15 59937 2705.86 6
 0 -28 -15 61249.2 2357.62 5
 0 28 -16 65600 2640.67 6
 0 -28 -16 62544.9 2187.38 5
 0 30 0 73168.5 2973.17 4
 0 30 1 3474.39 874.153 4
 0 30 -1 4079.9 846.379 4
 0 30 2 3380.76 774.079 4
 0 30 -2 4199.11 820.132 4
 0 30 -2 5232.89 823.054 6
 0 30 3 11149.3 1430.97 4
 0 30 -3 7497.77 963.99 6
 0 30 -3 9659.48 1216.03 4
 0 30 -4 83398.3 3433.42 4
 0 30 -4 58446.9 2573.66 6
 0 30 -5 10769.7 1214.86 6
 0 30 -5 11461 1428.17 4
 0 30 -6 3432.62 914.789 4
 0 30 -6 4972.24 915.265 6
 0 30 -7 41035.6 2389.84 6
 0 30 -8 2720.92 820.724 6
 0 30 -9 90801.6 3655.34 6
 0 30 -10 2175.68 860.032 6
 0 30 -11 86496.9 3604.29 6
 0 30 -12 1446.84 537.071 6
 0 30 -13 7235.23 1107.79 6
 0 30 -14 32211.3 2074.99 6
 0 30 -15 63153.1 2750.38 6
 0 32 0 205645 5133.45 4
 0 32 1 10613.2 1265.89 4
 0 32 -1 10458.6 1221.93 4
 0 32 2 38558.5 2373.89 4
 0 32 -2 39169.3 2303.72 4
 0 32 3 545.776 696.348 4
 0 32 -3 960.861 564.997 4
 0 32 -3 1188.01 524.54 6
 0 32 -4 4715.91 969.917 4
 0 32 -4 3947.31 712.41 6
 0 32 -5 3225.68 687.937 6
 0 32 -5 2891.32 694.35 4
 0 32 -6 58004.5 2777.9 6
 0 32 -6 58264.9 3211.13 4
 0 32 -7 8554.01 1181.87 6
 0 32 -8 2821.57 759.402 6
 0 32 -9 161675 4867.25 6
 0 32 -10 4318.55 1039.64 6
 0 32 -11 145609 4673.78 6
 0 32 -12 2767.77 765.571 6
 0 32 -13 2679.09 687.382 6
 0 32 -14 2762.59 642.587 6
 0 34 0 297423 6312.25 4
 0 34 1 8167.86 1239.39 4
 0 34 -1 8018.35 1182.49 4
 0 34 2 39753.5 2444.43 4
 0 34 -2 42991.3 2508.64 4
 0 34 3 43912.8 2728.35 4
 0 34 -3 35553.1 2345.51 4
 0 34 -4 9291.41 1346.7 4
 0 34 4 7558.5 1234.54 4
 0 34 -4 5692.33 890.548 6
 0 34 -5 48109.4 2496.43 6
 0 34 5 54846.9 3174.11 4
 0 34 -6 19942.5 1744.15 6
 0 34 -7 7237.02 1073.75 6
 0 34 -8 6205.69 1114.31 6
 0 34 -9 194778 5328.34 6
 0 34 -10 5638.25 1159 6
 0 34 -11 192997 5225.95 6
 0 34 -12 7072.15 1087.67 6
 0 34 -13 18462.2 1536.32 6
 0 34 15 2144.64 698.427 4
 0 36 0 374925 7263.42 4
 0 36 -1 8358.46 1305.57 4
 0 36 1 5582.98 1115.36 4
 0 36 -2 217712 5700.05 4
 0 36 2 222142 5664.21 4
 0 36 3 1764.61 699.152 4
 0 36 -3 3328.72 893.532 4
 0 36 -4 34971.2 2113.6 6
 0 36 -4 32404.5 2358.99 4
 0 36 4 30825.8 2290.94 4
 0 36 -5 17874.5 1546.77 6
 0 36 -5 21951 1998.43 4
 0 36 5 22812 2026.77 4
 0 36 6 26033.1 2228.98 4
 0 36 -6 27156.9 1942.08 6
 0 36 -7 1451.43 591.095 6
 0 36 7 316.408 758.706 4
 0 36 8 5703.72 1298.06 4
 0 36 -8 6392.49 1031.62 6
 0 36 -9 117324 4112.44 6
 0 36 -10 7704.23 1152.94 6
 0 36 -11 149513 4451.6 6
 0 36 -12 5079.11 884.447 6
 0 36 12 5409.25 1132.64 4
 0 36 13 14370.7 1514.79 4
 0 36 14 686.237 548.177 4
 0 38 0 208208 5482.23 4
 0 38 -1 27177.4 2179.9 4
 0 38 1 25536.8 2077.5 4
 0 38 -2 38030.8 2462.33 4
 0 38 2 37377.2 2384.71 4
 0 38 -3 3668.14 859.558 4
 0 38 3 4097.18 986.331 4
 0 38 4 45465.3 2691.67 4
 0 38 -4 45941.1 2773.33 4
 0 38 -5 29132.5 1978.82 6
 0 38 -5 27346.6 2213.57 4
 0 38 5 25832.5 2135.54 4
 0 38 -6 10952.6 1301.51 6
 0 38 6 9392.29 1417.78 4
 0 38 7 5106.28 1215.49 4
 0 38 -7 5508.28 914.124 6
 0 38 -8 1215.93 576.757 6
 0 38 8 1467.25 772.65 4
 0 38 -9 85807.4 3393.38 6
 0 38 9 83756.3 3798.36 4
 0 38 -10 3547.02 866.161 6
 0 38 10 3082.05 959.293 4
 0 38 11 85094.1 3637.94 4
 0 38 12 1853.11 574.203 4
 0 38 13 992.752 518.772 4
 0 40 0 311983 6736.81 4
 0 40 1 1579.9 659.751 4
 0 40 -1 943.935 631.448 4
 0 40 2 6907.74 1129.93 4
 0 40 -2 6867.91 1098.89 4
 0 40 -3 16116 1642.28 4
 0 40 3 15177.4 1580.87 4
 0 40 4 73401.9 3321.56 4
 0 40 -4 74372.8 3524.98 4
 0 40 5 46078.9 2708.88 4
 0 40 6 21666.6 1931.44 4
 0 40 7 6395.71 1060.29 4
 0 40 8 1048.65 698.872 4
 0 40 9 45456.4 2576.57 4
 0 40 10 1643.47 769.683 4
 0 40 11 17112 1509.74 4
 0 40 12 1289.88 552.512 4
 0 42 0 29989.6 2155.15 4
 0 42 -1 2785.04 837.334 4
 0 42 1 1281.42 580.913 4
 0 42 -2 6728.61 1087.39 4
 0 42 2 7860.79 1198.07 4
 0 42 3 12988.8 1465.76 4
 0 42 -3 14460.1 1580.63 4
 0 42 4 76923.2 3316.18 4
 0 42 5 97772.1 3770.56 4
 0 42 6 55396.3 2833.29 4
 0 42 7 7209.81 1159.33 4
 0 42 8 1194.78 522.748 4
 0 42 9 4272.89 824.526 4
 0 42 10 1270.99 603.123 4
 0 42 11 3419.97 724.114 4
 0 44 0 24569.1 1851.57 4
 0 44 1 1392.33 566.514 4
 0 44 -1 1624.49 726.903 4
 0 44 -2 3233.94 747.126 4
 0 44 2 3563.76 814.076 4
 0 44 -3 7466.83 1133.34 4
 0 44 3 8521.59 1143.66 4
 0 44 4 77594 3205.71 4
 0 44 5 74308.4 3145.09 4
 0 44 6 46340.2 2434.27 4
 0 44 7 47557 2405.88 4
 0 44 8 1728.66 608.801 4
 0 44 9 8297.79 989.269 4
 0 44 10 123.513 340.061 4
 0 46 0 45147.7 2375.53 4
 0 46 1 1782.33 623.902 4
 0 46 -1 1205.37 530.891 4
 0 46 2 -80.244 430.588 4
 0 46 -2 1016.16 615.789 4
 0 46 3 2614.63 687.384 4
 0 46 4 52480.5 2526.84 4
 0 46 5 52589.5 2461.65 4
 0 46 6 39043.6 2125.29 4
 0 46 7 39643.8 2051.5 4
 0 46 8 1250.8 482.707 4
 0 48 0 60433.3 2646.22 4
 0 48 -1 2067.94 576.934 4
 0 48 1 1463.93 603.939 4
 0 48 2 16966.4 1383.2 4
 0 48 3 902.272 489.175 4
 0 48 4 16771.5 1346.33 4
 0 48 5 24956.2 1573.79 4
 1 -1 2 13297.6 518.89 1
 -1 1 -2 12896.8 468.755 1
 1 1 2 13110.9 574.172 1
 1 1 3 2226.95 368.086 1
 -1 1 -3 1532.78 256.615 1
 1 -1 3 1984.72 330.709 1
 -1 -1 -3 1863.76 303.402 1
 1 1 4 19443.3 1014.14 1
 -1 1 -4 17860.5 817.587 1
 1 -1 4 19803.3 995.426 1
 1 1 -4 17987.5 1001.55 1
 1 -1 5 46965.5 1775.38 1
 -1 -1 -5 47554.7 1567.18 1
 1 1 5 44966.5 1833.72 1
 1 -1 -5 48680.4 1829.89 1
 -1 1 -5 45331.9 1454.51 1
 1 1 -5 46363.5 1712.3 1
 1 1 -6 17566.4 1175.09 1
 -1 1 -6 17559.6 1025.18 1
 1 -1 -6 20168 1295.03 1
 -1 -1 -6 17846.3 1066.58 1
 -1 1 -7 3691.23 579.221 1
 1 1 -7 3792.83 678.427 1
 1 -1 -7 4292.41 740.133 1
 -1 -1 -7 3851.69 580.622 1
 -1 1 -8 173264 3673.21 1
 1 -1 -8 175227 4215.28 1
 1 1 -8 175399 4089.73 1
 -1 -1 -8 173978 3834.83 1
 1 -1 -9 18371 1616.18 1
 -1 -1 -9 17665.2 1317.86 3
 -1 -1 -9 18956.7 1476.93 1
 -1 1 -9 19635.4 1436.02 1
 -1 1 -9 20126.8 1298.7 3
 1 1 -9 18757.8 1538.66 1
 -1 1 -10 387323 5736.06 3
 -1 -1 -10 372718 5702.9 3
 -1 1 -11 3806.12 695.656 3
 1 -1 -11 4474.73 900.684 3
 -1 -1 -11 4712.49 781.187 3
 1 1 -11 3918.12 819.362 3
 -1 1 -12 172998 4431.53 3
 1 1 -12 176113 4478.29 3
 -1 -1 -12 173162 4463.88 3
 1 -1 -12 173457 4500.73 3
 1 -1 -13 8789.85 1165.71 3
 -1 -1 -13 7028.81 1065.82 3
 -1 1 -13 6816.39 1070.48 3
 1 1 -13 8831.36 1172.16 3
 -1 1 -14 5035.96 939.582 3
 1 -1 -14 6741.14 1015.76 3
 -1 -1 -14 6648.45 1038.43 3
 1 1 -14 6808.53 1073.94 3
 1 1 -15 289.299 630.074 3
 -1 -1 -15 -378.973 552.802 3
 1 -1 -15 94.8158 519.416 3
 -1 1 -15 -337.134 571.454 3
 -1 -1 -16 -611.615 624.789 3
 1 1 -16 383.931 542.734 3
 -1 1 -16 293.686 535.769 3
 1 -1 -16 130.866 581.543 3
 1 1 -17 4332.03 987.524 3
 -1 1 -17 5307.56 946.456 3
 -1 -1 -17 4231.5 838.914 3
 1 -1 -17 4556.16 911.059 3
 -1 1 -18 5323.01 859.775 5
 -1 -1 -18 4900.72 832.855 3
 1 -1 -18 4982.18 916.972 3
 1 1 -18 4780.01 878.789 3
 1 -1 -19 36734.6 1998.16 3
 1 1 -19 36572.2 1983.73 3
 -1 -1 -19 33484.8 1807.48 5
 -1 1 -19 34770.8 1821.06 5
 -1 -1 -20 809.479 418.755 5
 1 -1 -20 1506.72 549.531 5
 1 1 -20 457.07 365.848 5
 -1 1 -20 669.351 455.842 5
 -1 -3 0 851.984 108.173 1
 1 3 0 863.016 110.094 1
 1 -3 1 697863 2055.9 1
 -1 -3 -1 708170 3174.02 1
 1 3 1 704373 3296.54 1
 1 -3 2 15879 512.51 1
 -1 3 -2 15478.2 438.901 1
 1 3 2 13924.3 646.241 1
 1 3 3 18151.1 892.376 1
 -1 3 -3 16188.1 605.599 1
 -1 3 -4 35382.9 1137.69 1
 1 3 -4 38387.3 1515.17 1
 1 3 4 35546.6 1547.8 1
 1 3 -5 168120 3067.5 1
 -1 3 -5 166450 2597.27 1
 1 3 5 164217 3492.95 1
 -1 3 -6 145198 2715.8 1
 -1 -3 -6 150711 3117.88 1
 1 -3 -6 151493 3520.77 1
 1 3 -6 149401 3146.15 1
 -1 -3 -7 5893.87 702.7 1
 -1 3 -7 5349.46 626.466 1
 1 3 -7 4493.51 692.266 1
 1 -3 -7 5392.36 771.092 1
 1 -3 -8 123275 3625.34 1
 -1 -3 -8 123029 3332.73 1
 -1 3 -8 116067 2888.96 1
 1 3 -8 117416 3237.14 1
 -1 -3 -9 21896.6 1415.42 3
 -1 3 -9 23626.7 1473.51 1
 1 3 -9 23563.8 1627.44 1
 -1 3 -9 21487.9 1377.39 3
 -1 -3 -10 235746 4498.41 3
 -1 3 -10 227721 4518.36 3
 1 3 -10 219332 4431.18 3
 1 -3 -11 3545.49 761.425 3
 -1 -3 -11 2720.37 650.611 3
 1 3 -11 2719.41 644.848 3
 -1 3 -11 3510.96 752.837 3
 -1 -3 -12 59885.1 2605.14 3
 1 3 -12 56142.2 2536.69 3
 -1 3 -12 57455.4 2541.74 3
 1 -3 -12 56912.5 2594.39 3
 1 3 -13 3071.37 770.812 3
 -1 3 -13 2595.75 758.393 3
 -1 -3 -13 2412.42 727.49 3
 1 -3 -13 1902.6 655.379 3
 -1 -3 -14 3232.6 809.331 3
 1 3 -14 3584.9 789.121 3
 -1 3 -14 2216.61 674.859 3
 1 -3 -14 2890.61 772.71 3
 1 3 -15 6770.41 1167.57 3
 1 -3 -15 7534.24 1160.39 3
 -1 3 -15 8498.1 1149.29 3
 -1 -3 -15 7342.44 1157.58 3
 -1 3 -16 7659.31 1098.83 3
 1 -3 -16 7102.39 1177.79 3
 1 3 -16 6942.02 1106.37 3
 -1 -3 -16 7128.53 1131.72 3
 1 3 -17 1652.58 551.939 3
 1 -3 -17 3349.79 835.968 3
 -1 3 -17 2054.69 681.239 3
 -1 -3 -17 3026.57 776.379 3
 1 3 -18 2708.5 749.974 3
 1 -3 -18 2677.59 763.092 3
 -1 -3 -18 2289.27 643.244 3
 -1 3 -18 1825.74 544.676 5
 1 -3 -19 38659 2073.28 3
 -1 3 -19 35930.8 1754.11 5
 -1 -3 -19 38736.2 1999.13 5
 -1 -3 -20 913.848 437.516 5
 1 3 -20 959.054 439.118 5
 1 -3 -20 1071.05 510.737 5
 -1 -5 0 1019.23 123.693 1
 1 5 0 983.699 140.616 1
 1 5 1 65725.3 1164.77 1
 1 5 -1 66946.6 635.404 1
 1 -5 1 66816.1 587.326 1
 -1 -5 -1 66445.8 1092.83 1
 1 -5 2 12268.2 406.854 1
 -1 -5 -2 11536.9 586.586 1
 1 5 2 11419.7 631.332 1
 -1 5 -2 12064.5 305.912 1
 -1 5 -3 19262 565.655 1
 1 5 3 20795.4 1026.28 1
 -1 5 -4 89305.4 1520.1 1
 1 5 4 86370.2 2283.03 1
 1 5 -4 89866.8 1904.59 1
 1 5 5 94869.6 2798.96 1
 1 5 -5 98178.9 2242.74 1
 -1 5 -5 94769.6 1840.87 1
 1 5 -6 118107 2663.98 1
 -1 -5 -6 117024 2813.24 1
 1 -5 -6 118775 3165.07 1
 -1 5 -6 117667 2294.61 1
 1 -5 -7 2257.49 661.849 1
 -1 -5 -7 2852.61 550.382 1
 -1 5 -7 2399.43 452.025 1
 1 5 -7 1663.24 493.592 1
 1 -5 -8 35174.4 2004.3 1
 -1 5 -8 32735.7 1500.53 1
 1 5 -8 31225.9 1612.27 1
 -1 -5 -8 34727.1 1840.88 1
 -1 -5 -9 22588.6 1361.58 3
 -1 5 -9 23292.8 1409.14 1
 -1 5 -9 22077.8 1383.56 3
 1 5 -9 21891.7 1463.6 1
 1 5 -9 21478.4 1399.64 3
 1 5 -10 138310 3447.28 6
 -1 5 -10 137277 3476.05 1
 1 5 -10 142127 3564.89 3
 -1 -5 -10 140238 3572.32 3
 1 5 -10 137660 3786.72 1
 -1 5 -10 146256 3552.06 3
 -1 5 -10 133334 3200.8 6
 -1 5 -11 721.373 407.994 6
 -1 5 -11 1269.73 625.769 3
 1 5 -11 873.672 344.883 6
 1 5 -11 1167.18 545.485 3
 1 -5 -11 1080.52 527.844 3
 -1 -5 -12 4626.86 812.541 3
 1 5 -12 4831.66 814.509 3
 1 -5 -12 4715.89 856.82 3
 -1 5 -12 4981.43 858.499 3
 -1 5 -12 4273.28 699.317 6
 1 5 -12 4867.48 739.681 6
 -1 -5 -13 5914.59 1033.47 3
 1 -5 -13 5017.48 893.418 3
 1 5 -13 5882.44 947.898 3
 -1 5 -13 5072.55 869.578 3
 1 5 -14 44310.4 2403.97 3
 1 -5 -14 33957.7 2157.37 3
 -1 -5 -14 35272.6 2185.95 3
 -1 5 -14 41961.8 2396.64 3
 1 5 -15 37720.2 2265.25 3
 -1 -5 -15 33959.2 2223.11 3
 -1 5 -15 36699.7 2213.47 3
 1 -5 -15 36980 2342.71 3
 -1 5 -16 49610.3 2545.16 3
 1 -5 -16 46530.5 2619.09 3
 -1 -5 -16 49383.7 2657.66 3
 1 5 -16 48677.1 2603.02 3
 1 -5 -17 23350.7 1867.8 3
 -1 5 -17 25209.1 1848.92 3
 1 5 -17 26369 1915.94 3
 -1 -5 -17 23865.4 1783.97 3
 1 5 -18 1311.12 629.106 3
 1 -5 -18 983.692 479.86 3
 -1 -5 -18 987.68 496.036 3
 -1 5 -18 1304.8 514.575 5
 1 5 -19 25369.3 1476.32 5
 -1 -5 -19 28395.8 1737.17 5
 1 -5 -19 27190.1 1705.24 3
 1 -5 -20 -306.576 388.627 5
 -1 -5 -20 664.278 485.042 5
 1 7 0 -55.9097 147.787 1
 -1 -7 0 24.3201 98.2263 1
 -1 -7 -1 1168.72 217.293 1
 1 7 -1 1083.31 108.999 1
 1 7 1 1159.34 280.756 1
 1 -7 2 2676.29 191.766 1
 1 7 2 2880.49 482.661 1
 -1 -7 -2 3408.27 409.791 1
 1 -7 -2 2850.57 497.74 1
 1 -7 -3 122778 2610.85 1
 -1 7 -3 130787 1211.48 1
 -1 -7 -3 121959 2290.82 1
 1 7 3 127647 2648.11 1
 -1 7 -4 2668.99 286.505 1
 1 7 4 2118.3 624.475 1
 1 7 -4 2118.9 391.162 1
 -1 7 -5 165305 2191.94 1
 -1 -7 -5 160480 3132.05 1
 1 7 -5 166188 2680.88 1
 1 -7 -5 168374 3576.25 1
 1 7 -6 134019 2654.69 1
 -1 7 -6 135607 2302.34 1
 1 -7 -6 135849 3466.4 1
 -1 -7 -6 130742 3054.4 1
 1 -7 -7 41909.6 2112.69 1
 -1 7 -7 41228.2 1439.1 1
 1 7 -7 39927.6 1616.46 1
 -1 -7 -7 43118.3 1960.05 1
 1 -7 -8 13280.7 1287.7 1
 1 7 -8 13758.3 1014.45 1
 -1 -7 -8 14823.3 1221.71 1
 -1 7 -8 13703.2 929.733 1
 -1 7 -9 1400.56 441.617 3
 1 7 -9 1463.52 470.665 3
 1 7 -9 914.357 389.361 1
 -1 7 -9 1310.71 351.791 1
 -1 -7 -9 729.143 398.996 3
 -1 -7 -10 113105 3167.16 3
 -1 7 -10 114353 3178.01 3
 1 7 -10 114465 3284.2 6
 -1 7 -10 110437 3086.43 6
 1 7 -10 114847 3195.08 3
 1 7 -11 1013.44 504.032 6
 -1 7 -11 1252.29 513.206 3
 1 -7 -11 1020.87 532.101 3
 -1 -7 -11 719.966 489.171 3
 -1 7 -11 1140.9 443.91 6
 1 7 -11 960.364 507.84 3
 -1 7 -12 2010.43 568.611 3
 -1 7 -12 2495.13 562.835 6
 1 7 -12 2832.88 637.395 3
 -1 -7 -12 2681.21 659.737 3
 1 -7 -12 3221 743.707 3
 1 7 -12 3126.9 633.417 6
 -1 7 -13 6125.15 868.73 6
 1 7 -13 6017.72 894.323 6
 -1 -7 -13 7609.9 1159.95 3
 1 -7 -13 7498.79 1045.89 3
 -1 7 -13 6566.87 983.458 3
 1 7 -13 6606.12 978.008 3
 1 7 -14 96907.3 3515.89 3
 1 -7 -14 80848.1 3298.56 3
 -1 7 -14 103167 3567.83 3
 -1 -7 -14 79427.2 3279.68 3
 1 -7 -15 107570 3850.71 3
 -1 7 -15 104597 3607.03 3
 1 7 -15 103810 3692.34 3
 -1 -7 -15 102235 3774.12 3
 -1 7 -16 102945 3600.52 3
 1 7 -16 108371 3711.51 3
 -1 -7 -16 105394 3714.8 3
 1 -7 -16 98170.3 3752.99 3
 1 7 -17 27937.5 1930.46 3
 -1 -7 -17 27510 1917.99 3
 1 -7 -17 26756.3 1942.44 3
 1 -7 -18 525.285 419.396 3
 -1 -7 -18 -220.71 517.442 5
 1 7 -18 -114.514 420.23 3
 -1 -7 -18 719.598 511.718 3
 1 -7 -19 2998.52 624.053 3
 -1 -7 -19 3643.97 736.266 5
 -1 -7 -20 -324.028 420.211 5
 1 -7 -20 1510.13 596.771 5
 -1 -9 0 1951.74 228.431 1
 1 9 0 2246.57 321.382 1
 1 -9 0 2028.3 331.906 1
 1 9 -1 13440.2 390.77 1
 1 -9 -1 13562.5 706.589 1
 1 9 1 14616 733.13 1
 1 -9 1 11610.1 337.228 1
 -1 -9 -1 14163.8 614.342 1
 -1 -9 -2 17556.8 912.002 1
 1 9 2 16580.3 1064.45 1
 1 -9 -2 17381.9 1040.94 1
 -1 -9 -3 304676 3650.15 1
 1 9 3 312288 4279.47 1
 1 -9 -3 305946 4052.79 1
 1 9 -3 295779 2174.92 1
 1 9 4 263106 4475.16 1
 1 -9 -4 255067 4111.03 1
 -1 9 -4 267827 1886.4 1
 1 9 -4 266308 2555.42 1
 -1 -9 -4 256544 3668.4 1
 -1 9 -5 251316 2349.41 1
 1 9 -5 246499 2883.61 1
 1 -9 -5 249295 4426.03 1
 -1 -9 -5 249234 3972.51 1
 1 9 -6 323807 3782.99 1
 -1 9 -6 314315 3147.16 1
 1 -9 -6 312754 5308.72 1
 -1 -9 -7 100692 3043.3 1
 -1 9 -7 100442 2067.67 1
 1 9 -7 97148.4 2304.74 1
 1 -9 -7 98097.7 3238.96 1
 -1 9 -8 109532 2373.77 1
 1 9 -8 108102 2626.8 1
 1 9 -9 3109.77 515.426 3
 -1 9 -9 3867.96 513.216 1
 1 9 -9 3674.77 564.66 1
 -1 9 -9 3682.58 613.765 6
 1 9 -9 4303.17 724.922 6
 -1 -9 -9 3447.3 612.197 3
 -1 9 -9 4169.79 622.545 3
 1 9 -10 61960.1 2505.78 6
 -1 9 -10 66179.1 2395.94 3
 -1 -9 -10 61349.6 2305.61 3
 -1 9 -10 62380.3 2410.99 6
 1 9 -10 61941.8 2364.84 3
 -1 9 -11 855.07 398.697 3
 -1 -9 -11 793.989 479.536 3
 -1 9 -11 1247.23 432.73 6
 1 -9 -11 1343.88 577.229 3
 1 9 -11 1133.71 402.282 6
 1 9 -11 1064.5 468.019 3
 -1 9 -12 318.156 408.571 3
 -1 -9 -12 454.376 438.999 3
 -1 9 -12 504.196 385.128 6
 1 -9 -12 221.638 500.452 3
 1 9 -12 108.224 405.177 6
 1 9 -12 479.846 648.35 3
 -1 -9 -13 15287.2 1466.23 3
 -1 9 -13 13064.7 1292.19 3
 1 9 -13 12238.6 1251.92 6
 1 -9 -13 10590.5 1183.77 3
 1 9 -13 12726.2 1233.66 3
 -1 9 -13 12612.8 1234.46 6
 -1 9 -14 107121 3486.88 6
 1 9 -14 111292 3562.86 6
 -1 -9 -14 90170.8 3328.64 3
 -1 9 -14 111657 3674.06 3
 1 9 -14 110896 3695.68 3
 1 -9 -14 85518.8 3436.9 3
 1 9 -15 92431.4 3410.72 3
 -1 9 -15 92322.2 3356.19 3
 -1 -9 -15 93610.4 3453.38 3
 1 -9 -15 88545.5 3462.09 3
 -1 -9 -16 67655.7 3006.6 3
 1 9 -16 70373.9 2947.36 3
 -1 9 -16 67387.4 2900.93 3
 1 -9 -16 69751.1 3072.96 3
 1 -9 -17 27663 1908.88 3
 -1 -9 -17 27065.3 1842.56 3
 1 9 -17 26370.5 1797.05 3
 1 -9 -18 2641.98 685.445 3
 -1 -9 -18 2579.52 760.468 5
 -1 -9 -19 -309.628 446.389 5
 1 -9 -19 266.55 331.312 3
 1 -9 -20 195.429 396.98 5
 -1 -9 -20 -168.154 362.066 5
 -1 -11 0 2895.9 255.236 1
 1 -11 0 2987.79 350.653 1
 1 11 0 2211.52 328.136 1
 1 11 1 87693.2 1852.15 1
 -1 -11 -1 90239.6 1584.29 1
 1 -11 -1 87177.9 1738.19 1
 1 11 -1 82781.7 1106.38 1
 -1 -11 -2 3658.41 413.384 1
 1 11 2 3399.62 510.925 1
 1 -11 -2 3104.34 472.53 1
 -1 -11 -3 26994.5 1165.61 1
 1 11 3 29164.9 1465.33 1
 1 -11 -3 27763.8 1296.25 1
 -1 -11 -4 62588.9 1907.99 1
 1 11 -4 58057.2 912.763 1
 1 -11 -4 60364 2056.4 1
 -1 11 -5 239647 1881.96 1
 1 11 -5 234519 2363.69 1
 -1 -11 -5 234261 3976.66 1
 1 -11 -5 231628 4306.67 1
 -1 -11 -6 312780 4960.87 1
 1 -11 -6 306596 5325.32 1
 -1 11 -6 319346 2727.32 1
 1 11 -6 319485 3232.16 1
 1 -11 -7 162788 4267.45 1
 -1 -11 -7 171114 3998.68 1
 -1 11 -7 167213 2327.65 1
 1 11 -7 165208 2662.14 1
 -1 11 -8 50057.5 1463.63 1
 -1 11 -8 49535.6 2060.51 6
 1 11 -8 49252.2 1609.97 1
 1 11 -9 734.631 376.787 6
 -1 11 -9 1063.53 424.932 6
 -1 -11 -9 930.128 365.024 3
 -1 11 -9 1437.98 420.456 3
 1 11 -9 1477.82 423.373 3
 -1 11 -10 46786.3 2008.91 3
 -1 11 -10 45565.8 2139.76 6
 1 11 -10 43538.5 2161.92 6
 -1 -11 -10 43659.1 1994.13 3
 1 11 -10 45153.9 2011.22 3
 -1 11 -11 1033.47 470.434 3
 1 11 -11 1628.28 567.487 3
 1 11 -11 832.517 473.288 6
 -1 11 -11 981.821 451.086 6
 1 -11 -11 887.845 484.094 3
 -1 -11 -11 885.092 468.574 3
 -1 11 -12 662.457 527.008 6
 1 -11 -12 1016.47 541.008 3
 -1 11 -12 549.454 454.59 3
 1 11 -12 396.89 421.554 3
 -1 -11 -12 108.962 409.522 3
 1 11 -12 693.2 441.683 6
 1 -11 -13 5702.2 934.68 3
 -1 -11 -13 6370.61 1072.16 3
 1 11 -13 4487.32 846.884 3
 1 11 -13 4946.96 875.419 6
 -1 11 -13 4255.14 831.112 6
 -1 11 -13 4393.74 777.518 3
 -1 -11 -14 72021.7 3029.39 3
 1 11 -14 68493.3 2899.96 6
 1 11 -14 70384.8 2963.14 3
 -1 11 -14 71323 2935.76 3
 -1 11 -14 69617.2 2901.6 6
 -1 -11 -15 44267.9 2361.35 3
 1 -11 -15 46137.8 2460.97 3
 1 11 -15 39216.3 2255.07 6
 -1 11 -15 41919.8 2232.95 3
 -1 11 -15 42657.5 2247.21 6
 1 11 -15 46112.5 2405.74 3
 1 11 -16 33080.3 2056.92 3
 -1 -11 -16 32108.5 2003.32 3
 1 -11 -16 31446.2 2094.64 3
 1 -11 -17 27193.6 1859.68 3
 1 11 -17 26659.1 1756.4 3
 -1 -11 -17 27392.7 1783.82 3
 1 -11 -18 559.609 422.535 3
 -1 -11 -18 1191.06 630.796 5
 1 -11 -19 327.412 526.381 5
 -1 -11 -19 389.77 461.105 5
 -1 -11 -20 -6.55468 361.82 5
 1 -11 -20 285.514 381.06 5
 1 -13 0 7839.24 544.674 1
 -1 -13 0 11216.1 548.173 1
 1 -13 -1 228926 2881.25 1
 -1 -13 -1 250854 2695.15 1
 -1 -13 -2 4175.58 472.076 1
 1 -13 -2 3928.09 513.185 1
 1 -13 -3 57301.4 1893.8 1
 -1 -13 -3 61278 1769.27 1
 -1 -13 -4 33462 1441.25 1
 1 -13 -4 32415.7 1550.43 1
 1 -13 -5 143948 3443.06 1
 -1 -13 -5 144622 3197.86 1
 1 -13 -6 383360 6109.46 1
 -1 -13 -6 394418 5667.77 1
 1 13 -6 388333 2762.89 1
 -1 13 -6 395311 2323.35 1
 -1 -13 -7 52867 2261.6 1
 1 -13 -7 37749.5 2105.52 1
 -1 13 -8 7495.29 900.314 6
 1 13 -8 7774.66 922.55 6
 1 13 -9 8615.85 870.341 3
 1 13 -9 7193.19 909.951 6
 -1 13 -9 7271.32 892.862 6
 -1 -13 -9 7772.97 813.526 3
 -1 13 -9 8134.04 820.315 3
 1 13 -10 126172 3333.07 3
 -1 -13 -10 121004 3196.21 3
 -1 13 -10 116734 3571.16 6
 -1 13 -10 121303 3180.51 3
 1 13 -10 123218 3739.52 6
 -1 -13 -11 827.954 488.651 3
 -1 13 -11 1809.13 666.638 6
 1 13 -11 1714.63 634.339 6
 -1 13 -11 1807.58 592.259 3
 1 13 -11 1782.58 599.568 3
 1 -13 -11 1172.58 526.334 3
 1 13 -12 6617.24 959.995 3
 -1 -13 -12 5992.22 880.049 3
 -1 13 -12 5115.51 905.637 6
 -1 13 -12 5849.67 868.363 3
 1 -13 -12 5364.98 870.888 3
 1 13 -12 5819.72 958.405 6
 1 13 -13 281.309 571.619 6
 -1 13 -13 -429.868 651.298 6
 1 13 -13 2036.5 642.593 3
 1 -13 -13 -305.364 646.391 3
 -1 13 -13 2711.12 688.053 3
 -1 -13 -13 3148.64 783.691 3
 1 13 -14 4284.4 820.901 6
 -1 13 -14 4274.33 835.61 6
 1 -13 -14 3037.5 779.426 3
 -1 -13 -14 4469.89 838.019 3
 -1 13 -14 4327.31 832.332 3
 1 13 -14 4512.21 819.608 3
 -1 13 -15 20377.4 1625.56 6
 1 13 -15 21213.5 1623.59 3
 1 13 -15 19031.1 1632.71 6
 1 -13 -15 20769.4 1665.11 3
 -1 -13 -15 19985 1574.26 3
 1 -13 -16 23785.9 1752.13 3
 1 13 -16 22682.3 1674.61 6
 -1 13 -16 21157.7 1645.05 6
 -1 -13 -16 22347.5 1661.84 3
 1 13 -16 25139 1697.11 3
 1 -13 -17 5997.25 899.935 3
 -1 -13 -17 5285.51 833.667 3
 -1 -13 -17 6678.95 1048.5 5
 -1 -13 -18 -175.183 479.428 5
 1 -13 -18 103.065 336.491 3
 1 -13 -19 6072.17 849.533 5
 -1 -13 -19 6247.54 859.039 5
 -1 -13 -20 112.113 361.903 5
 1 -13 -20 1089.98 505.743 5
 -1 -15 0 5629.2 430.595 1
 1 -15 0 4790.49 443.917 1
 -1 -15 -1 274517 2871.58 1
 1 -15 -1 269543 3218.39 1
 1 -15 -2 1943.81 429.209 1
 -1 -15 -2 1881.11 369.76 1
 1 -15 -3 -60.5882 330.141 1
 -1 -15 -3 104.894 285.532 1
 -1 -15 -4 13737.4 974.887 1
 1 -15 -4 13066.5 1063.68 1
 1 -15 -5 56859.5 2252.22 1
 -1 -15 -5 62047 2174.12 1
 1 -15 -6 21536.9 1522.06 1
 -1 -15 -6 21681.1 1393.59 1
 -1 15 -7 3691.72 631.89 6
 1 15 -7 3784.55 638.541 6
 -1 15 -8 38699 1990.73 6
 -1 15 -8 39433.1 1596.66 3
 1 15 -8 39920.3 2037.86 6
 -1 15 -9 5943 867.624 6
 -1 -15 -9 4714.44 688.157 3
 1 15 -9 5712.28 921.791 6
 1 15 -9 5288.14 696.305 3
 -1 15 -9 5644.39 692.555 3
 1 15 -10 173015 4477.98 6
 -1 15 -10 180397 3836.84 3
 -1 15 -10 175544 4452.28 6
 1 15 -10 178762 3917.69 3
 1 -15 -10 170850 3936.88 3
 -1 -15 -10 171978 3819.09 3
 -1 15 -11 2254.42 607.877 3
 1 15 -11 2413.2 750.956 6
 1 15 -11 3116.03 640.877 3
 1 -15 -11 1586.28 598.913 3
 -1 -15 -11 2073.36 540.045 3
 -1 15 -11 1742.18 626.049 6
 1 15 -12 22935.1 1758.74 6
 -1 -15 -12 21166.1 1590.5 3
 -1 15 -12 22182.1 1788.01 6
 1 15 -12 17253 1345.52 3
 1 -15 -12 22568.2 1638.6 3
 -1 15 -12 24038.8 1622.39 3
 -1 15 -13 -558.585 610.466 6
 -1 -15 -13 895.271 552.885 3
 1 -15 -13 -317.618 516.591 3
 1 15 -13 149.328 376.601 3
 1 15 -13 -103.142 459.044 6
 -1 15 -14 3021.13 737.801 6
 1 15 -14 3262.02 706.054 6
 -1 -15 -14 1941.06 537.076 3
 1 -15 -14 3309.07 761.73 3
 1 15 -14 1585 409.154 3
 1 15 -15 15475.8 1433.71 6
 -1 15 -15 15162.3 1430.4 6
 -1 -15 -15 13881.3 1302.47 3
 1 15 -15 15442.5 1357.79 3
 1 -15 -15 12721.9 1307.84 3
 1 -15 -16 5408.24 901.621 3
 -1 -15 -16 6351.84 873.489 3
 1 15 -16 6362.39 951.709 6
 -1 15 -16 6946.68 989.936 6
 -1 -15 -17 453.18 595.771 5
 1 15 -17 401.157 424.363 6
 1 -15 -17 -283.464 451.548 3
 1 -15 -18 2222.06 524.993 3
 1 -15 -18 2360.7 668.837 5
 -1 -15 -18 2665.58 726.839 5
 -1 -15 -19 28710.2 1647.89 5
 1 -15 -19 29882.1 1670.6 5
 1 -15 -20 1047.11 450.914 5
 -1 -15 -20 412.907 304.634 5
 -1 -17 0 4162.83 394.225 1
 1 -17 0 3157.88 382.656 1
 1 -17 -1 128079 2224.68 1
 -1 -17 -1 133175 2040.23 1
 1 -17 -2 9168.71 727.087 1
 -1 -17 -2 8813.56 655.642 1
 -1 -17 -3 245.356 240.365 1
 1 -17 -3 230.426 296.584 1
 -1 -17 -4 6445.79 729.681 1
 1 -17 -4 7776.03 830.235 1
 -1 -17 -5 7309 829.761 1
 1 -17 -5 7468.51 890.36 1
 1 -17 -6 846.594 377.343 1
 -1 17 -6 70.7925 265.749 6
 1 17 -6 809.025 483.669 6
 -1 17 -6 662.989 432.602 4
 -1 -17 -6 283.415 361.827 1
 1 17 -7 1667.78 490.878 6
 -1 17 -7 1382.79 429.52 6
 1 17 -8 99625.9 3271.19 6
 -1 17 -8 99375.1 3177.14 6
 1 17 -9 13408.1 1304.5 6
 1 17 -9 13022.8 1004.05 3
 -1 17 -9 12369.8 1243.14 6
 -1 17 -10 240396 5356.72 6
 1 17 -10 238368 5475.79 6
 1 -17 -10 231908 4566.49 3
 1 17 -10 244659 4479.39 3
 1 -17 -11 1598.12 590.059 3
 1 17 -11 1176.1 450.359 3
 1 17 -11 2628.05 822.126 6
 -1 17 -11 2217.34 729.738 6
 1 -17 -12 35564.5 2006.84 3
 1 17 -12 28035.3 2010.61 6
 -1 -17 -12 35474.2 1871.64 3
 1 17 -12 27614.5 1666.65 3
 -1 17 -12 25598.9 1958.96 6
 1 -17 -13 995.97 521.51 3
 1 17 -13 1275.8 593.969 6
 -1 -17 -13 1572.5 573.428 3
 -1 17 -13 982.11 617.88 6
 1 17 -13 631.135 336.658 3
 -1 -17 -14 4556.36 846.271 3
 -1 17 -14 4230.39 776.951 6
 1 17 -14 3642.2 795.41 6
 1 -17 -14 5224.99 868.532 3
 -1 -17 -15 7328.93 938.437 3
 -1 17 -15 8866.23 1161.36 6
 1 -17 -15 8140.13 1040.01 3
 1 17 -15 8204.63 1091.89 6
 -1 -17 -16 4672.88 885.167 5
 1 17 -16 4325.85 815.64 6
 1 -17 -16 3606.15 714.242 3
 -1 17 -16 4090.75 839.329 6
 -1 -17 -16 3380.61 675.646 3
 -1 -17 -17 717.333 606.995 5
 1 -17 -17 279.678 339.469 3
 1 17 -17 605.583 460.768 6
 1 -17 -18 4337.07 804.002 5
 -1 -17 -18 4820.03 790.303 5
 1 -17 -19 61442.1 2272.61 5
 -1 -17 -19 62733 2285.21 5
 1 -19 0 3620.45 342.201 1
 -1 -19 0 4316.7 383.622 1
 1 -19 -1 125459 2138.19 1
 -1 -19 -1 120976 1931.52 1
 1 -19 -2 280.907 269.357 1
 -1 -19 -2 499.031 253.448 1
 1 -19 -3 6560.75 694.327 1
 -1 -19 -3 7546.43 712.243 1
 1 -19 -4 4871.6 687.608 1
 -1 -19 -4 3919.61 555.296 1
 1 19 -5 8506.01 903.072 6
 -1 -19 -5 8209.53 868.579 1
 1 -19 -5 7939.77 903.806 1
 -1 19 -5 8216.81 833.716 6
 -1 19 -5 7909.69 894.212 4
 -1 19 -6 14700.5 1187.9 6
 1 19 -6 15537.2 1242.13 4
 -1 19 -6 14493 1300.68 4
 1 19 -6 14649.1 1241.63 6
 1 19 -7 2434.45 587.768 6
 -1 19 -7 1623.22 549.571 6
 1 19 -8 67430.2 2784.02 6
 -1 19 -8 68727.1 2729.65 6
 -1 19 -9 6388.39 1037.31 6
 1 19 -9 5575.54 945.91 6
 1 19 -10 167186 4726.55 6
 -1 19 -10 175790 4694.57 6
 -1 19 -11 -343.903 560.334 6
 1 19 -11 474.188 441.773 6
 1 19 -12 22651.7 1857.17 6
 -1 19 -12 22995.5 1848.68 6
 1 19 -13 625.269 481.788 6
 -1 19 -13 1425.65 628.745 6
 1 -19 -14 3341.54 619.916 3
 1 19 -14 3913.16 870.269 6
 -1 19 -14 3882.07 869.978 6
 1 19 -15 9590.71 1157.91 6
 -1 19 -15 7910.67 1076.38 6
 -1 -19 -15 9532.74 1226.36 5
 1 19 -16 6950.61 1002.47 6
 -1 19 -16 7285.95 1023.83 6
 -1 -19 -16 8745.09 1176.22 5
 -1 -19 -17 -252.938 514.392 5
 1 -19 -17 -119.326 512.974 5
 1 19 -17 600.557 407.279 6
 1 -19 -18 3216.54 668.707 5
 -1 -19 -18 2385.53 564.355 5
 -1 -19 -19 44297 1821.18 5
 1 -19 -19 42025.4 1801.52 5
 -1 21 -1 168707 3623.79 4
 -1 -21 -1 164978 2168.31 1
 1 -21 -1 170990 2382.12 1
 -1 -21 -2 777.085 244.367 1
 -1 21 -2 900.613 387.403 4
 1 -21 -2 548.023 229.896 1
 -1 -21 -3 51013.5 1709.46 1
 1 -21 -3 53263.5 1881.3 1
 -1 21 -3 51880 2113.82 4
 1 21 -4 14275.4 1194.36 6
 1 21 -4 12178.5 1084.78 4
 -1 -21 -4 13379.6 1008.58 1
 1 -21 -4 13194.9 1063.98 1
 -1 21 -4 15208.7 1233.58 4
 -1 21 -4 14547.6 1106.08 6
 -1 -21 -5 21829.4 1396.66 1
 -1 21 -5 22012.8 1568.26 4
 1 21 -5 21481.6 1488.34 4
 1 21 -5 21272.3 1452.95 6
 -1 21 -5 22363.7 1436.75 6
 1 -21 -5 22420.4 1466.99 1
 -1 21 -6 52649.2 2499.45 4
 1 21 -6 51364.4 2419.67 4
 1 21 -6 51533.8 2334.9 6
 -1 21 -6 53143.9 2284.91 6
 1 21 -7 7095.14 936.071 6
 -1 21 -7 7604.97 968.13 6
 -1 21 -8 12852.7 1273.65 6
 1 21 -8 13614 1365.7 6
 1 21 -9 1591.56 604.04 6
 -1 21 -9 1750.64 648.92 6
 1 21 -10 57277.7 2849.01 6
 -1 21 -10 55208.8 2763.94 6
 -1 21 -11 2287.35 724.595 6
 1 21 -11 4287.25 978.256 6
 -1 21 -12 16406 1647.36 6
 1 21 -12 14888.4 1554.19 6
 1 21 -13 768 556.571 6
 -1 21 -13 318.546 472.943 6
 -1 21 -14 12652.3 1372.09 6
 -1 -21 -14 10210.7 1242.64 5
 1 21 -14 13126.8 1478.15 6
 1 21 -15 23064.7 1806.84 6
 -1 -21 -15 21795.1 1682.65 5
 -1 21 -15 24252 1837.96 6
 1 -21 -16 13238 1313.72 5
 -1 21 -16 13769.1 1346.08 6
 1 21 -16 12903.5 1289.51 6
 -1 -21 -16 14587 1343.39 5
 1 21 -17 4534.6 772.677 6
 -1 -21 -17 4824.2 755.953 5
 1 -21 -17 3895.06 752.906 5
 1 -21 -18 509.749 421.039 5
 -1 -21 -18 448.286 404.36 5
 -1 -21 -19 14620.3 1021.88 5
 1 -21 -19 14242.5 996.61 5
 1 23 0 865.196 519.763 4
 -1 23 0 2262.51 685.551 4
 -1 23 -1 104982 3091.42 4
 1 23 -1 109404 3159.27 4
 -1 23 -2 170.664 226.597 6
 -1 23 -2 567.052 420.354 4
 1 23 -2 68.6998 351.36 4
 -1 23 -3 111078 3280.41 4
 1 23 -3 110037 3099.22 6
 1 23 -3 108445 3203.41 4
 -1 23 -3 109818 3005.03 6
 1 23 -4 114269 3436.3 4
 -1 23 -4 115033 3271.85 6
 -1 23 -4 114039 3489.79 4
 1 23 -4 121550 3358.26 6
 1 23 -5 164644 4098.08 6
 -1 23 -5 154324 4249.64 4
 -1 23 -5 157142 3908.81 6
 1 23 -5 158140 4184.56 4
 1 23 -6 115994 3571.67 6
 -1 23 -6 112997 3833.37 4
 1 23 -6 121258 3825.56 4
 -1 23 -6 113148 3496.59 6
 -1 23 -7 28164.5 1828.73 6
 -1 -23 -7 24658.7 1364.93 5
 1 23 -7 27938.7 1858.04 6
 -1 23 -8 8188.88 1029.57 6
 1 23 -8 8229.6 1043.25 6
 1 23 -9 2330.6 733.173 6
 -1 23 -9 2520.49 754.66 6
 -1 23 -10 19262.5 1751.77 6
 1 23 -10 18478.8 1670.36 6
 1 23 -11 353.099 543.611 6
 -1 23 -11 1297.82 721.964 6
 1 23 -12 6791.78 1103.88 6
 -1 23 -12 6786.58 1097.73 6
 -1 -23 -12 7467.13 1066.76 5
 -1 23 -13 3410.23 867.95 6
 1 23 -13 2148.5 708.318 6
 -1 -23 -13 2057.52 664.92 5
 1 23 -14 29618.2 2110.1 6
 -1 -23 -14 32196.3 1995.4 5
 -1 23 -14 32056.7 2176.05 6
 -1 23 -15 23413.5 1821.09 6
 1 23 -15 23899.7 1815.51 6
 -1 -23 -15 22971.4 1676.26 5
 1 -23 -15 23717.8 1695.57 5
 -1 -23 -16 26103.1 1683.87 5
 1 23 -16 24057.7 1724.48 6
 1 -23 -16 24190.2 1630.64 5
 -1 23 -16 23886.5 1719.11 6
 1 23 -17 14086.6 1238.17 6
 1 -23 -17 15745.5 1216.34 5
 -1 -23 -17 16845.4 1258.23 5
 1 -23 -18 -243.015 336.161 5
 -1 -23 -18 -133.689 345.482 5
 -1 25 0 969.182 516.073 4
 1 25 0 716.704 479.282 4
 -1 25 1 39164.5 2074.51 4
 -1 25 -1 39072.1 1972.57 4
 1 25 -1 40115.4 2038.41 4
 -1 25 -2 689.539 333.211 6
 1 25 -2 300.961 276.438 6
 1 25 -2 701.261 440.211 4
 -1 25 -2 293.346 426.059 4
 1 25 -3 81889.8 2748.71 6
 -1 25 -3 81239.2 2940.41 4
 -1 25 -3 79214.6 2683.84 6
 1 25 -3 81002.7 2916.76 4
 1 25 -4 108451 3306.8 6
 1 25 -4 105567 3493.76 4
 -1 25 -4 108086 3587.92 4
 -1 25 -4 112018 3279.93 6
 1 25 -5 233052 5008.11 6
 1 25 -5 220331 5249.57 4
 -1 25 -5 235364 5470.71 4
 -1 25 -5 233221 4968.63 6
 1 25 -6 200575 4804.05 6
 1 25 -6 199814 5152.75 4
 -1 25 -6 196142 4677.37 6
 -1 25 -6 189130 5160.45 4
 -1 25 -7 37187 2230.39 6
 1 25 -7 35517.6 2128.43 6
 1 25 -8 9891.52 1193.75 6
 -1 25 -8 9342.46 1139.86 6
 -1 -25 -8 9225.05 899.846 5
 -1 25 -9 155.822 484.237 6
 1 25 -9 248.404 520.468 6
 -1 -25 -9 104.327 448.506 5
 -1 25 -10 14701.5 1554.61 6
 1 25 -10 14427.7 1536.85 6
 -1 -25 -10 13874.7 1237.28 5
 1 25 -11 1225.07 620.008 6
 -1 25 -11 240.102 580.326 6
 -1 -25 -11 73.2489 480.504 5
 -1 25 -12 20822.2 1862.12 6
 1 25 -12 18671.4 1758.21 6
 -1 -25 -12 19522.2 1523.01 5
 1 25 -13 3782.51 869.175 6
 -1 -25 -13 4364.28 794.453 5
 1 -25 -13 2761.07 698.693 5
 -1 25 -13 3023.82 772.024 6
 -1 25 -14 28515.4 2046.29 6
 1 25 -14 26931.2 2000.52 6
 1 -25 -14 28185.8 1820.87 5
 -1 -25 -14 27446.9 1770.36 5
 -1 25 -15 44730.6 2427.55 6
 -1 -25 -15 41796.8 2111.73 5
 1 -25 -15 40832.6 2091.43 5
 1 25 -15 40006.5 2348.61 6
 1 -25 -16 44146 2059.47 5
 -1 -25 -16 45315 2076.65 5
 -1 25 -16 44833 2294.69 6
 1 25 -16 41157.8 2205.49 6
 1 25 -17 28105.3 1692.79 6
 1 -25 -17 26393 1470.59 5
 -1 -25 -17 28234.1 1511.3 5
 -1 -25 -18 611.253 286.746 5
 1 27 0 810.562 402.381 4
 -1 27 0 687.406 493.341 4
 1 27 1 3299.21 710.708 4
 1 27 -1 3651.54 728.011 4
 -1 27 -1 4132.12 753.909 4
 -1 27 1 4375.95 860.204 4
 -1 27 2 3452.11 780.972 4
 -1 27 -2 3770.82 607.327 6
 1 27 -2 4033.02 629.391 6
 1 27 -2 3947.26 735.543 4
 -1 27 -2 3969.98 773.714 4
 -1 27 -3 71317.2 2607.16 6
 1 27 -3 72293.4 2660.77 6
 -1 27 -3 72848.2 2912.79 4
 1 27 -3 68557 2858.36 4
 -1 27 -4 70226.5 3038.02 4
 1 27 -4 71194.4 3028.74 4
 1 27 -4 72007.1 2810.86 6
 -1 27 -4 72402.3 2746.16 6
 1 27 -5 161757 4299.6 6
 -1 27 -5 155298 4642.42 4
 -1 27 -5 161514 4227.5 6
 1 27 -5 157625 4608.89 4
 1 27 -6 174791 4652.34 6
 -1 27 -6 170454 4518 6
 1 27 -6 169878 4975.63 4
 -1 27 -6 166278 5051.19 4
 1 27 -7 15035.1 1460.16 6
 -1 27 -7 14425.1 1413.1 6
 -1 27 -8 680.006 474.882 6
 1 27 -8 -42.8603 479.584 6
 -1 27 -9 778.985 678.2 6
 1 27 -9 1156.07 717.117 6
 -1 27 -10 28977.2 2100.35 6
 1 27 -10 30228.1 2238.12 6
 -1 -27 -10 32633.1 1799.82 5
 1 -27 -11 1151.26 615.566 5
 -1 -27 -11 1230.23 470.221 5
 -1 27 -11 680.963 650.323 6
 1 27 -11 454.001 599.269 6
 1 27 -12 24276.8 1983.79 6
 -1 -27 -12 25938.6 1705.23 5
 -1 27 -12 24736.1 2005.92 6
 1 -27 -13 6071.28 930.864 5
 -1 -27 -13 3727.54 794.789 5
 -1 27 -13 4397.89 952.988 6
 1 27 -13 4674.39 996.485 6
 1 -27 -14 42806.7 2138.29 5
 -1 -27 -14 42852.2 2122.14 5
 -1 27 -14 40730.3 2442.37 6
 1 27 -14 40698.3 2385.84 6
 -1 -27 -15 50398.5 2176.84 5
 1 27 -15 49325.1 2535.55 6
 1 -27 -15 50099.1 2225.8 5
 -1 27 -15 52516.1 2585.33 6
 1 -27 -16 44125 1919.73 5
 1 27 -16 38962.1 2102.17 6
 -1 -27 -16 43280.6 1905.43 5
 1 -27 -17 18386 1133.71 5
 -1 -27 -17 19200 1188.84 5
 1 29 0 374.595 456.287 4
 -1 29 0 441.964 558.379 4
 1 29 -1 21585.8 1668.21 4
 -1 29 1 21904 1672.34 4
 1 29 1 21366.7 1651.23 4
 -1 29 -1 21259.9 1589.64 4
 -1 29 -2 -22.273 300.445 6
 1 29 -2 273.459 475.866 4
 1 29 2 187.798 629.309 4
 1 29 -2 -170.459 358.549 6
 -1 29 -2 -445.143 566.453 4
 -1 29 2 -180.503 494.48 4
 -1 29 -3 34585.6 1889.25 6
 1 29 -3 34145.2 2159.88 4
 -1 29 3 33827.2 2231.62 4
 1 29 -3 27049.9 1706.78 6
 -1 29 -3 35475.4 2146.74 4
 -1 29 -4 45731.3 2263.94 6
 1 29 -4 46089.9 2328.85 6
 -1 29 -4 47086.9 2553.06 4
 1 29 -4 45288.1 2536.41 4
 1 29 -5 65608.8 3120.35 4
 -1 29 -5 66671.3 2807.2 6
 -1 29 -5 63499.6 3100.72 4
 1 29 -5 65130 2850.34 6
 -1 29 -6 25355.8 2071.15 4
 1 29 -6 27864.1 2120.69 4
 -1 29 -6 27497.1 1930.09 6
 1 29 -6 28026 1975.67 6
 -1 29 -7 10013.8 1283.04 6
 1 29 -7 9743.75 1211.16 6
 1 29 -8 835.319 486.522 6
 -1 29 -8 255.863 472.198 6
 1 29 -9 3507.36 875.519 6
 -1 29 -9 2777 848.602 6
 1 29 -10 54552.9 2894.71 6
 -1 29 -10 57601.7 2971.27 6
 -1 29 -11 784.58 680.59 6
 1 29 -11 957.098 608.743 6
 -1 -29 -12 1626.7 414.385 5
 1 29 -12 1553.81 698.931 6
 -1 29 -12 1601.27 658.437 6
 1 29 -13 6179.94 1103.56 6
 -1 -29 -13 8224.39 948.824 5
 -1 29 -13 7694.75 1122.03 6
 -1 29 -14 71480.5 3118.29 6
 -1 -29 -14 73973.6 2630.94 5
 1 29 -14 65510.2 3008.57 6
 -1 -29 -15 32233 1684.01 5
 -1 29 -15 31746.7 1975.68 6
 1 29 -15 30365.7 1908.28 6
 -1 -29 -16 18755.8 1178.17 5
 1 29 -16 18229.5 1373.47 6
 -1 31 0 2242.68 753.228 4
 1 31 0 1917.61 741.811 4
 -1 31 1 77714.4 3144.8 4
 1 31 1 81293.6 3242.82 4
 1 31 -1 84266.7 3261.97 4
 -1 31 -1 78831.5 3221.63 4
 1 31 -2 489.543 575.852 4
 -1 31 -2 1860.32 729.407 4
 -1 31 -2 1220.66 401.186 6
 1 31 2 2109.43 778.232 4
 -1 31 2 861.889 617.048 4
 1 31 3 4661.66 846.566 4
 -1 31 3 7578.97 1166.9 4
 -1 31 -3 6394.3 879.085 6
 1 31 -3 8536.12 1168.44 4
 1 31 -3 5526.1 790.539 6
 -1 31 -3 5221.83 834.792 4
 -1 31 -4 658.901 488.04 4
 1 31 -4 3268.71 901.288 4
 1 31 -4 1671.19 531.827 6
 -1 31 4 1795.44 738.08 4
 -1 31 -4 1453.98 590.586 6
 -1 31 -5 1825.9 614.71 6
 1 31 -5 1608.99 551.309 6
 -1 31 -5 919.329 638.935 4
 -1 31 -6 14042.2 1626.96 4
 1 31 -6 18243.6 1592.47 6
 -1 31 -6 18777.8 1659.79 6
 1 31 -6 17990.9 1774.79 4
 1 31 -7 5452.5 953.574 6
 -1 31 -7 6221.46 1045.84 6
 1 31 -8 13719.3 1478.79 6
 -1 31 -8 14870.2 1536.6 6
 -1 31 -9 6838.29 1166.77 6
 1 31 -9 6135.26 1086.35 6
 1 31 -10 134644 4491.79 6
 -1 31 -10 132666 4507.82 6
 1 31 -11 2783.35 913.959 6
 -1 31 -11 3219.74 908.417 6
 1 31 -12 17701.2 1680.07 6
 -1 31 -12 17870 1638.34 6
 -1 31 -13 -132.018 464.648 6
 1 31 -13 619.933 478.19 6
 1 31 -14 22344.5 1686.73 6
 -1 31 -14 22278.7 1730.16 6
 1 31 -15 20819.4 1564.78 6
 -1 33 0 3944.29 999.845 4
 1 33 0 2566.61 849.201 4
 1 33 -1 136257 4331.15 4
 -1 33 -1 147525 4412.77 4
 -1 33 1 138400 4283.73 4
 1 33 1 141455 4362.91 4
 -1 33 2 4738.66 1017.44 4
 1 33 2 3038.85 811.753 4
 -1 33 -2 3401.92 873.722 4
 1 33 -2 4175.88 863.093 4
 1 33 -3 21738.6 1625.82 6
 -1 33 3 22670.9 1958.16 4
 1 33 -3 18992.1 1694.01 4
 1 33 3 19886.8 1837.79 4
 -1 33 -3 17852 1451.13 6
 -1 33 -3 20022.7 1776.75 4
 1 33 -4 7870.79 1274.26 4
 -1 33 -4 5392.08 825.698 6
 -1 33 -4 5546.69 1088.14 4
 1 33 -4 5124.3 830.837 6
 -1 33 4 5920.99 1137.66 4
 1 33 -5 11504.2 1482.83 4
 -1 33 -5 8201.26 1300.62 4
 1 33 -5 7803.42 1012.53 6
 -1 33 -5 7183.52 1039.03 6
 -1 33 5 10718.6 1536.03 4
 1 33 -6 29552.5 2050.52 6
 -1 33 -6 28476.5 2283.46 4
 -1 33 -6 29331.1 2047.3 6
 -1 33 -7 1160.25 557.539 6
 1 33 -7 1466.65 565.816 6
 -1 33 -8 34013.2 2243.95 6
 1 33 -8 34954.9 2267.89 6
 -1 33 -9 8955.33 1302.42 6
 1 33 -9 9261.42 1321.98 6
 -1 33 -10 205122 5572.38 6
 1 33 -10 206894 5522.9 6
 1 33 -11 2589.99 822 6
 -1 33 -11 4252.17 961.917 6
 -1 33 -12 53853.8 2765.98 6
 1 33 -12 53541.2 2754.09 6
 -1 33 -13 2125.76 667.51 6
 1 33 -13 1838.81 626.651 6
 1 33 -14 310.215 402.491 6
 1 35 0 2481.26 938.707 4
 -1 35 0 6236.56 1305.28 4
 1 35 -1 204042 5338.48 4
 -1 35 1 205681 5346.47 4
 -1 35 -1 198737 5336.02 4
 -1 35 -2 22446.2 2023.21 4
 1 35 2 21754.5 2019.56 4
 1 35 -2 24771.4 2055.06 4
 -1 35 2 21033 1860.16 4
 -1 35 -3 57651.2 3001.83 4
 1 35 3 53981.5 2941.04 4
 1 35 -3 58715.6 3026.79 4
 -1 35 3 56938.1 2971.02 4
 -1 35 -4 1403.55 641.33 6
 1 35 -4 794.945 520.729 6
 1 35 4 31.1921 665.935 4
 -1 35 -4 392.252 618.085 4
 -1 35 4 87.7556 670.754 4
 1 35 -4 1276.34 810.251 4
 -1 35 -5 27759.3 2304.93 4
 1 35 5 27429.9 2336.19 4
 -1 35 -5 22104.7 1737.48 6
 -1 35 5 27303.2 2252.2 4
 1 35 -5 20879 1644.12 6
 1 35 -5 29640.9 2332.53 4
 -1 35 -6 22692.2 1802.75 6
 1 35 -6 19899.2 1653.27 6
 1 35 6 21581.3 2087.65 4
 -1 35 6 21710.2 2042.79 4
 1 35 -7 1007.39 590.2 6
 -1 35 -7 1116.11 632.037 6
 -1 35 7 -14.6579 737.418 4
 -1 35 8 41916 2885.4 4
 -1 35 -8 42704.5 2477.6 6
 1 35 -8 42220.7 2503.81 6
 1 35 -9 7202.7 1145.36 6
 -1 35 -9 7643.02 1200.58 6
 1 35 -10 174382 5032.45 6
 -1 35 -10 174443 5016.77 6
 -1 35 -11 4413.1 951.575 6
 1 35 -11 4142.4 932.241 6
 -1 35 -12 74438.7 3153.3 6
 1 35 -12 74915.9 3093.25 6
 1 35 -13 2999.32 713.562 6
 -1 35 13 2637.94 816.641 4
 -1 35 14 2199.65 738.66 4
 1 35 15 972.572 551.091 4
 1 37 0 3509.98 993.2 4
 -1 37 0 4273.26 1060.45 4
 1 37 1 231626 5789.56 4
 1 37 -1 237334 5872.6 4
 -1 37 -1 231792 5813.28 4
 -1 37 1 236366 5868.35 4
 -1 37 -2 10948.5 1373.52 4
 1 37 2 10540.9 1388.19 4
 -1 37 2 9411.79 1351.37 4
 1 37 -2 9587.86 1332.48 4
 -1 37 3 394.392 572.914 4
 1 37 3 1649.12 768.422 4
 -1 37 -3 1384.29 744.716 4
 1 37 -3 2061.33 803.722 4
 -1 37 -4 6836.88 1202.37 4
 -1 37 4 6356.89 1087.35 4
 1 37 4 5588.71 1046.93 4
 1 37 -4 7004.11 1191.47 4
 1 37 5 11688.4 1583.38 4
 1 37 -5 12929.7 1334.11 6
 1 37 -5 11357.9 1422.41 4
 -1 37 -5 12028.2 1566.92 4
 -1 37 5 13621.4 1609.65 4
 -1 37 6 13569.7 1598.73 4
 1 37 -6 13654.9 1383.97 6
 1 37 6 12835.5 1617.15 4
 -1 37 -6 14107.3 1445.39 6
 -1 37 -7 574.344 403.642 6
 1 37 7 -836.898 894.885 4
 1 37 -7 717.337 476.275 6
 -1 37 7 242.133 634.473 4
 -1 37 -8 24921.9 1929.64 6
 1 37 8 22700.3 2166.27 4
 -1 37 8 23967.5 2157.34 4
 1 37 -8 24144.1 1838.62 6
 1 37 9 5802.57 1326.39 4
 1 37 -9 5084.61 882.592 6
 -1 37 -9 5829.92 980.858 6
 -1 37 9 7716.4 1368.75 4
 -1 37 10 126778 4572.81 4
 -1 37 -10 125448 4114.75 6
 1 37 -10 123806 4038.04 6
 1 37 10 128853 4820.4 4
 -1 37 11 3819.58 1019.21 4
 1 37 -11 3145.59 764.943 6
 1 37 11 3584.21 1037.63 4
 1 37 12 43208.2 2638.24 4
 1 37 -12 37267.6 2136.72 6
 -1 37 12 38740 2420.38 4
 -1 37 13 1293.64 580.884 4
 1 37 13 2276.94 774.381 4
 -1 37 14 -466.189 540.715 4
 1 37 14 -597.208 433.112 4
 -1 39 0 3755.26 1047.66 4
 1 39 0 2211.34 846.362 4
 -1 39 1 95057.4 3745.79 4
 1 39 -1 98481.4 3839.9 4
 1 39 1 93445.5 3782.18 4
 -1 39 -1 97596.1 3842.88 4
 -1 39 2 1514.75 637.148 4
 1 39 -2 1249.6 633.751 4
 -1 39 -2 1082.3 670.469 4
 1 39 2 665.298 673.335 4
 1 39 -3 23776.1 2047.79 4
 1 39 3 22603.1 1898.79 4
 -1 39 3 22643.4 1908.14 4
 -1 39 -3 22559.2 1942 4
 -1 39 -4 19824.6 1883.13 4
 1 39 -4 21641.8 1966.93 4
 -1 39 4 20953.5 1860.5 4
 1 39 4 20086.2 1823.97 4
 1 39 -5 35640.2 2145.01 6
 1 39 5 30725.1 2256.21 4
 -1 39 5 32821.3 2333.08 4
 1 39 6 18662.8 1791.8 4
 1 39 -6 17571.6 1550.18 6
 -1 39 6 17109.8 1700.86 4
 1 39 -7 1770.81 605.3 6
 1 39 7 1877.39 1066.24 4
 -1 39 7 1252.11 655.915 4
 1 39 -8 7589.57 1032.51 6
 -1 39 8 7251.83 1229.07 4
 1 39 8 7054.86 1271.7 4
 -1 39 9 3768.28 897.031 4
 1 39 9 3912.82 955.947 4
 1 39 -9 3463.12 773.548 6
 1 39 10 52547.8 2917.69 4
 -1 39 10 55017.3 2842.39 4
 1 39 -10 50494.2 2469.56 6
 1 39 11 1497.57 709.452 4
 -1 39 11 2497.16 759.937 4
 1 39 12 5823.17 932.334 4
 -1 39 12 6474.31 976.588 4
 1 39 13 901.617 468.321 4
 -1 39 13 389.23 433.357 4
 -1 41 0 1712.73 695.451 4
 1 41 0 1086.13 658.183 4
 -1 41 1 10311.8 1259.26 4
 1 41 -1 12351.1 1440.28 4
 1 41 1 11087.9 1338.66 4
 -1 41 -1 11354.5 1376.43 4
 1 41 2 1624.74 642.263 4
 -1 41 2 3388.98 829.232 4
 1 41 -2 2259.82 780.139 4
 -1 41 -2 2569.58 817.279 4
 1 41 3 36823 2346.3 4
 -1 41 3 38768 2412.67 4
 1 41 -3 38910.7 2538.75 4
 -1 41 -3 40443.3 2558.77 4
 -1 41 4 32970.3 2208.23 4
 1 41 4 32158.9 2218.18 4
 -1 41 -4 33314.4 2366.86 4
 1 41 -4 35006.3 2451.38 4
 -1 41 5 59539.7 2975.8 4
 1 41 5 63045.3 3112.03 4
 1 41 6 43881.7 2582.71 4
 -1 41 6 42394.6 2527.92 4
 1 41 7 2745.4 877.233 4
 -1 41 7 2528.55 791.039 4
 1 41 8 1421.99 675.585 4
 -1 41 8 1393.42 620.436 4
 -1 41 9 756.449 510.415 4
 1 41 9 498.063 554.199 4
 -1 41 10 13135.2 1322.28 4
 1 41 10 14690.3 1436.24 4
 1 41 11 -237.371 422.136 4
 -1 41 11 498.356 425.649 4
 1 41 12 3155.91 697.299 4
 -1 41 12 1662.84 513.371 4
 -1 43 0 567.171 611.464 4
 1 43 0 88.2538 469.765 4
 -1 43 -1 2122.32 749.552 4
 -1 43 1 1542.09 698.857 4
 1 43 -1 1643.16 624.838 4
 1 43 1 387.128 509.317 4
 -1 43 2 1589.81 652.55 4
 -1 43 -2 938.514 535.943 4
 1 43 2 166.399 456.844 4
 1 43 -2 877.439 631.898 4
 1 43 3 42648.6 2426.28 4
 -1 43 3 38451.6 2329.19 4
 -1 43 -3 38832.5 2448.87 4
 1 43 -3 44313.6 2588.46 4
 1 43 4 36271.6 2279.47 4
 -1 43 4 37407 2280.13 4
 -1 43 5 75848.3 3205.06 4
 1 43 5 73837.8 3171.77 4
 1 43 6 67595.3 3027.76 4
 -1 43 6 68866.8 3010.99 4
 -1 43 7 8162.97 1103.38 4
 1 43 7 9634.64 1225.83 4
 1 43 8 861.239 524.391 4
 -1 43 8 -2.51992 453.399 4
 1 43 9 505.34 489.321 4
 -1 43 9 1301.37 539.872 4
 1 43 10 1980.93 589.614 4
 -1 43 10 2291.88 615.117 4
 1 45 0 27.483 436.331 4
 -1 45 0 -17.6891 471.82 4
 -1 45 -1 7290.1 1040.91 4
 1 45 1 8813.15 1199.55 4
 -1 45 1 7298.22 1040.3 4
 1 45 -1 8441.21 1158.37 4
 1 45 2 402.366 465.33 4
 -1 45 -2 1089.67 579.597 4
 1 45 -2 -562.604 550.315 4
 -1 45 2 1432.83 638.76 4
 1 45 3 26479.3 1885.14 4
 -1 45 3 27666.2 1894.9 4
 1 45 4 24272.4 1760.3 4
 -1 45 4 22851 1744.25 4
 -1 45 5 49196 2469.4 4
 1 45 5 51021.2 2506.17 4
 -1 45 6 59022.9 2625.04 4
 1 45 6 56269.3 2598.63 4
 -1 45 7 14760.5 1309.39 4
 1 45 7 13991.7 1330.17 4
 -1 45 8 8062.49 990.665 4
 1 45 8 7526.08 935.906 4
 -1 45 9 798.518 434.327 4
 1 45 9 -280.893 369.657 4
 -1 47 0 591.046 514.257 4
 1 47 0 1041.65 541.123 4
 -1 47 1 25776.8 1806.41 4
 1 47 -1 25846.6 1838.43 4
 1 47 1 25059.4 1757.57 4
 -1 47 -1 24161.6 1743.24 4
 1 47 2 -287.575 466.457 4
 -1 47 2 522.365 441.751 4
 -1 47 3 3452.21 747.729 4
 1 47 3 3059 693.291 4
 -1 47 4 11220.1 1168.21 4
 1 47 4 11623.3 1169.65 4
 1 47 5 29171.8 1761.88 4
 -1 47 5 29480.9 1786.45 4
 1 47 6 34109 1869.15 4
 -1 47 6 33865.1 1856.29 4
 1 47 7 6037.73 854.144 4
 -1 47 7 7600.91 907.728 4
 -1 49 0 729.799 466.26 4
 -1 49 1 47293 2211.87 4
 1 49 1 47591.6 2218.65 4
 -1 49 2 3544.56 690.067 4
 -1 49 3 1389.43 553.639 4
 2 0 1 23735.8 581.431 1
 -2 0 -2 121121 1449.82 1
 2 0 2 123621 1607.94 1
 -2 0 -3 15282.4 661.688 1
 2 0 3 15290.7 734.384 1
 -2 0 -4 30517.4 1198.55 1
 2 0 4 31744.6 1346.62 1
 2 0 5 8728.21 798.654 1
 -2 0 -5 9041.61 666.973 1
 -2 0 -6 4571.79 552.315 1
 2 0 6 4614.18 751.203 1
 2 0 -6 5095.08 772.657 1
 -2 0 -7 782.249 354.814 1
 2 0 -7 1336.26 535.491 1
 2 0 7 104.191 533.998 1
 -2 0 -8 5629.92 763.019 1
 2 0 -8 5958.08 896.783 1
 2 0 -9 186093 4761.75 1
 -2 0 -9 187014 4087 1
 -2 0 -9 186251 3764.58 3
 -2 0 -10 500.109 399.921 3
 -2 0 -11 211919 4511.19 3
 2 0 -12 9103.12 1141.96 3
 -2 0 -12 9175.33 1115.62 3
 -2 0 -13 73481.2 3046.95 3
 2 0 -13 72291.4 3072.66 3
 -2 0 -14 8603.21 1180.31 3
 2 0 -14 6852.85 1159.13 3
 -2 0 -15 1858.78 706.972 3
 2 0 -15 3581.14 941.031 3
 2 0 -16 5876.26 1051.69 3
 -2 0 -16 6463.87 1002.15 3
 -2 0 -17 615.455 521.783 3
 2 0 -17 708.361 575.523 3
 -2 0 -18 23247.2 1623.5 5
 2 0 -18 22828 1764.01 3
 -2 0 -19 590.759 375.596 5
 2 0 -19 1346.79 550.251 3
 -2 0 -20 45707.6 1825.08 5
 2 0 -20 47510.3 2003.8 5
 2 2 0 999999 3421.75 1
 2 2 1 5023.87 298.244 1
 -2 2 -1 5144.01 255.271 1
 2 -2 1 5024.42 266.771 1
 -2 2 -2 113021 1273.76 1
 2 -2 2 113918 1430.2 1
 2 2 2 107006 1624 1
 2 2 3 30286.5 1069.71 1
 -2 2 -3 28960.3 806.739 1
 2 2 4 74096.8 2042.74 1
 -2 2 -4 71304.1 1561.49 1
 2 -2 5 2744.13 520.63 1
 2 2 5 2838.41 596.453 1
 -2 -2 -5 2851.37 444.211 1
 -2 2 -5 3101.65 403.347 1
 2 2 -6 2070.62 621.992 1
 2 -2 6 2246.42 599.965 1
 -2 2 -6 2152.28 422.589 1
 2 2 6 1765.62 542.62 1
 2 -2 -6 1625.95 498.032 1
 -2 -2 -6 2588.41 459.122 1
 2 2 -7 11648.3 1115.76 1
 2 -2 -7 11519.7 1182.89 1
 2 2 7 11422.1 1226.9 1
 -2 2 -7 10926.4 854.097 1
 -2 -2 -7 10853.4 938.266 1
 2 2 -8 7827.79 961.899 1
 2 -2 -8 8335.69 1096.71 1
 -2 -2 -8 8388.56 896.898 1
 -2 2 -8 7831.96 819.583 1
 -2 -2 -9 215875 4076.82 3
 -2 2 -9 214153 4191.45 1
 -2 2 -9 215341 3980.03 3
 2 2 -9 208952 4867.45 1
 -2 -2 -10 1493.7 553.142 3
 -2 2 -10 1378.29 528.71 3
 -2 -2 -11 94403.4 3057.17 3
 -2 2 -11 96778.3 3092.65 3
 2 2 -12 5275.51 907.831 3
 -2 -2 -12 4421.66 862.667 3
 -2 2 -12 3930.07 864.676 3
 2 -2 -12 4651.34 887.25 3
 2 2 -13 12321.2 1306.73 3
 -2 -2 -13 12899 1326.9 3
 -2 2 -13 12642.4 1333.8 3
 2 -2 -13 12239 1356.16 3
 -2 -2 -14 1629 707.898 3
 2 2 -14 874.46 630.938 3
 -2 2 -14 1033.88 591.145 3
 2 -2 -14 1489.22 630.976 3
 2 -2 -15 2796 839.828 3
 -2 -2 -15 1723.24 698.791 3
 2 2 -15 923.131 551.414 3
 -2 2 -15 1915.91 782.912 3
 2 2 -16 295.452 538.844 3
 2 -2 -16 1323.75 689.557 3
 -2 2 -16 256.667 557.355 3
 -2 -2 -16 596.966 557.814 3
 2 -2 -17 4172.59 942.702 3
 -2 -2 -17 3938.94 833.015 3
 2 2 -17 4209.8 921.007 3
 -2 -2 -18 7058.92 994.296 5
 -2 2 -18 6469.18 856.797 5
 2 -2 -18 7849.96 1079.36 3
 2 2 -18 6188.76 949.3 3
 -2 -2 -19 4857.25 762.564 5
 -2 2 -19 3384.32 606.967 5
 2 2 -19 3779.83 732.326 3
 2 -2 -19 4161.43 765.215 3
 2 2 -20 10657.2 935 5
 -2 2 -20 10491.2 862.838 5
 2 -2 -20 11111.4 1045.71 5
 -2 -2 -20 11272.1 963.556 5
 2 4 0 105194 1152.15 1
 -2 -4 0 106198 1150.57 1
 -2 -4 -1 11303.9 443.148 1
 2 4 1 11321 481.159 1
 2 -4 1 11087.3 373.869 1
 -2 -4 -2 27747.8 832.903 1
 2 4 2 27850.4 902.298 1
 -2 4 -2 28150.6 591.272 1
 2 -4 3 4134.1 402.921 1
 2 4 3 4611.87 543.906 1
 -2 4 -3 4406.93 324.651 1
 2 4 4 61829.9 1853.33 1
 -2 4 -4 66000.6 1304.36 1
 -2 4 -5 46743.2 1292.45 1
 2 -4 5 51808 1722.08 1
 2 4 5 48021.3 1894.24 1
 2 -4 -6 17838.7 1348.96 1
 2 4 -6 16421.9 1146.52 1
 2 -4 6 16311.7 1183.21 1
 -2 4 -6 16048.2 857.909 1
 2 4 6 15261.1 1234.34 1
 -2 -4 -6 15096 1005.47 1
 2 -4 -7 2787.6 748.626 1
 -2 -4 -7 2589.96 541.652 1
 2 4 7 2920.81 787.956 1
 -2 4 -7 2445.79 423.424 1
 2 4 -7 2032.67 574.924 1
 2 4 -8 25314.3 1596.83 1
 2 -4 -8 24811.4 1790.82 1
 -2 -4 -8 25841.1 1533.21 1
 -2 4 -8 23927.2 1279.75 1
 -2 4 -9 81368.1 2482 1
 2 4 -9 79980.2 2887.88 1
 -2 4 -9 83974.4 2509.75 3
 -2 -4 -9 84956.5 2503.64 3
 -2 4 -10 734.367 455.779 3
 -2 -4 -10 542.012 402.748 3
 2 4 -11 28164.8 1730.06 3
 2 4 -11 28160.2 1644.21 6
 -2 4 -11 29576 1710.9 3
 -2 -4 -11 29172.5 1818.92 3
 -2 -4 -12 894.687 550.404 3
 2 4 -12 538.583 439.489 3
 2 -4 -12 456.364 455.293 3
 2 4 -12 835.259 399.056 6
 -2 4 -12 736.628 511.244 3
 -2 -4 -13 277.282 632.355 3
 -2 4 -13 -246.323 509.405 3
 2 -4 -13 -55.177 494.505 3
 2 4 -13 361.362 536.667 3
 2 4 -14 3801.42 871.938 3
 -2 -4 -14 3730.4 830.47 3
 2 -4 -14 5185.8 975.334 3
 -2 4 -14 3641.5 839.624 3
 2 4 -15 8466.43 1225.95 3
 -2 -4 -15 9666.07 1262.79 3
 -2 4 -15 9737.33 1253.85 3
 2 -4 -15 9449.19 1312.07 3
 2 4 -16 7169.23 1133.06 3
 2 -4 -16 6693.1 1084.91 3
 -2 -4 -16 5957.59 1065.25 3
 -2 4 -16 7302.82 1116.25 3
 2 -4 -17 1797.88 759.23 3
 -2 4 -17 2199.05 642.709 5
 -2 -4 -17 1859.37 710.476 3
 2 4 -17 2351.99 728.748 3
 -2 4 -18 13883 1186.63 5
 2 4 -18 13546.8 1349.14 3
 -2 -4 -18 14424.5 1357.89 5
 2 -4 -18 13929.3 1375.89 3
 -2 -4 -19 1283.54 549.957 5
 2 4 -19 1361.58 531.169 3
 2 -4 -19 1218.89 539.912 3
 -2 4 -19 636.601 358.004 5
 -2 -4 -20 12101.5 1000.8 5
 2 -4 -20 11817.2 1062.47 5
 2 4 -20 10954 916.548 5
 2 6 0 905.121 154.778 1
 -2 -6 0 934.855 164.427 1
 2 6 -1 4237.77 244.744 1
 -2 -6 -1 3725.24 300.911 1
 2 6 1 3904.2 333.785 1
 2 6 2 43826.8 1232.19 1
 -2 -6 -2 44160 1142.11 1
 -2 6 -3 38107.5 807.203 1
 2 6 3 36094 1366.68 1
 -2 6 -4 60452.2 1157.5 1
 2 6 4 57942.6 1941.63 1
 2 -6 5 5622.66 631.927 1
 -2 6 -5 5961.32 446.009 1
 2 6 5 5432.55 751.721 1
 2 -6 -5 5814.81 818.517 1
 -2 -6 -5 5751.1 609.552 1
 -2 6 -6 34989.6 1181.71 1
 2 6 -6 35617.5 1585.74 1
 -2 -6 -6 35387.5 1556.25 1
 2 -6 -6 35583.2 1876.04 1
 2 6 6 32145 1812.58 1
 -2 -6 -7 14990.3 1107.84 1
 2 6 -7 14865.9 1125.1 1
 -2 6 -7 13466.7 834.956 1
 2 -6 -7 14070.7 1317.24 1
 -2 6 -8 7909.92 693.498 1
 2 -6 -8 8073.03 1066.04 1
 -2 -6 -8 8572.14 936.057 1
 2 6 -8 7769.96 889.415 1
 -2 -6 -9 29013.8 1487.84 3
 -2 6 -9 29814 1421.23 1
 2 6 -9 31102 1781.23 1
 -2 6 -9 31873 1564.8 3
 -2 -6 -10 724.551 477.996 3
 -2 6 -10 182.134 362.512 6
 -2 6 -10 1095.41 440.862 3
 2 6 -10 705.706 463.373 3
 -2 6 -11 457.408 322.843 6
 2 6 -11 635.333 418.498 6
 -2 -6 -11 324.218 345.59 3
 -2 6 -11 106.572 388.001 3
 2 6 -11 1292.97 528.826 3
 -2 6 -12 1792.65 609.894 3
 -2 6 -12 2583.33 576.937 6
 2 6 -12 2168.88 594.641 6
 2 6 -12 1503.51 489.112 3
 -2 -6 -12 1634.11 518.522 3
 -2 6 -13 15255 1398.76 3
 -2 -6 -13 17934.3 1569.13 3
 2 6 -13 15710 1458.11 3
 2 -6 -13 17738.1 1556.7 3
 2 6 -13 16150.2 1339.73 6
 -2 6 -14 12348.8 1285.77 3
 2 -6 -14 11756.6 1329.22 3
 -2 -6 -14 10929.8 1277.12 3
 2 6 -14 13229 1378.16 3
 2 6 -15 48702.1 2582.51 3
 -2 -6 -15 53793.3 2652.3 3
 -2 6 -15 51015.9 2601.4 3
 2 -6 -15 49632.8 2716.4 3
 -2 6 -16 48042 2480.64 3
 2 -6 -16 44437.8 2631.52 3
 2 6 -16 43934.4 2512.94 3
 -2 -6 -16 47885.9 2510.18 3
 -2 6 -17 1719.48 554.202 5
 2 -6 -17 746.4 463.258 3
 2 6 -17 620.216 435.35 3
 -2 -6 -17 1223.31 523.047 3
 2 -6 -18 2540.45 705.629 3
 -2 -6 -18 2271.36 738.286 5
 2 6 -18 2718.17 660.966 3
 -2 -6 -19 -449.516 410.535 5
 2 -6 -19 -95.4151 410.513 3
 -2 -6 -20 2755.58 576.961 5
 2 -6 -20 2103.49 578.522 5
 -2 -8 0 321.666 159.504 1
 2 8 0 336.254 204.09 1
 -2 -8 -1 1315.06 271.225 1
 2 8 -1 1717.45 222.43 1
 2 8 1 1641.35 340.307 1
 2 8 2 100691 2050.05 1
 2 -8 2 103194 1125.81 1
 -2 -8 -2 102023 1844.78 1
 2 8 3 16331 1032.91 1
 -2 -8 -3 15834.8 876.193 1
 -2 -8 -4 436147 4632.27 1
 -2 8 -4 447353 2819.25 1
 2 8 4 427857 5525.05 1
 2 -8 -4 433008 5693.37 1
 2 -8 -5 30013.3 1653.76 1
 2 -8 5 30568.7 1277.17 1
 -2 8 -5 29101 860.882 1
 2 8 -5 29450.5 1276.42 1
 2 8 5 28540.7 1598.74 1
 -2 -8 -5 28287.6 1327.43 1
 2 -8 -6 88429.2 3018.84 1
 -2 -8 -6 83291.5 2428.96 1
 -2 8 -6 82756.3 1656.94 1
 2 8 6 80152.6 2951.48 1
 2 8 -6 86017.8 2295.81 1
 2 -8 -7 120016 3725.12 1
 -2 -8 -7 113786 3098 1
 -2 8 -7 113341 2176.55 1
 2 8 -7 114800 2837.09 1
 -2 8 -8 8014.39 658.536 1
 2 8 -8 8354.23 863.404 1
 -2 8 -9 784.09 296.63 1
 2 8 -9 129.086 321.025 1
 -2 8 -9 769.247 336.807 6
 2 8 -9 1094.88 377.897 3
 -2 8 -9 937.517 361.586 3
 -2 -8 -9 1254.85 432.995 3
 2 8 -10 -252.104 359.658 3
 -2 8 -10 48.9916 266.11 6
 -2 8 -10 -43.4752 390.658 3
 -2 -8 -10 215.387 317.379 3
 2 8 -11 28522.6 1719.05 3
 -2 8 -11 27818.2 1649.67 6
 -2 8 -11 28302 1684.34 3
 -2 -8 -11 28970.5 1717.28 3
 2 8 -11 27241.9 1761.2 6
 -2 8 -12 1761 572.825 6
 2 8 -12 1401.92 564.902 6
 -2 8 -12 1558.11 502.948 3
 2 8 -12 2592.86 705.556 3
 -2 -8 -12 1312.94 559.231 3
 2 8 -13 56312.2 2623.55 3
 -2 -8 -13 57959.8 2601.42 3
 -2 8 -13 55204.7 2533.1 3
 2 8 -13 52490.7 2558.97 6
 -2 8 -13 55149 2466.82 6
 -2 -8 -14 19025.9 1646.3 3
 2 -8 -14 20920.3 1739.76 3
 -2 8 -14 23740.2 1778.6 3
 2 8 -14 23043.2 1643.9 6
 2 8 -14 25067.6 1812.34 3
 -2 8 -15 68905.8 2908.45 3
 -2 -8 -15 63358.2 2899.18 3
 2 8 -15 69197.9 3010.38 3
 2 -8 -15 69378 3117.36 3
 -2 -8 -16 29031.4 1955.98 3
 2 -8 -16 30653.1 2114.29 3
 2 8 -16 32267.7 2093.09 3
 2 8 -17 15350.5 1430.43 3
 -2 -8 -17 15432.7 1394.82 3
 2 -8 -17 15646.7 1492.83 3
 -2 -8 -17 15303.6 1462.42 5
 -2 -8 -18 988.443 543.537 5
 2 8 -18 1303.22 537.187 3
 2 -8 -18 1169.58 544.455 3
 -2 -8 -19 449.561 494.639 5
 2 -8 -19 553.193 407.882 3
 -2 -8 -20 2864.46 588.559 5
 2 -8 -20 3018.01 611.9 5
 -2 -10 0 28853.3 733.287 1
 2 10 0 30791.2 855.961 1
 2 10 1 5362.28 473.299 1
 -2 -10 -1 5132.91 347.751 1
 2 10 -1 6419.28 321.217 1
 2 10 2 11492.5 829.226 1
 2 10 -2 12921.9 418.469 1
 2 -10 2 11880.6 369.526 1
 -2 -10 -2 10995.8 675.997 1
 2 -10 -3 18523 1181.93 1
 2 -10 3 19182.3 587.852 1
 -2 -10 -3 18873.1 951.436 1
 2 10 3 19494.4 1133.98 1
 2 -10 4 165635 2157.07 1
 -2 -10 -4 169205 3011.42 1
 2 -10 -4 161720 3510.08 1
 2 10 4 166054 3581.58 1
 2 10 5 71964.9 2641.01 1
 -2 -10 -5 74082.3 2176.72 1
 2 10 -5 74186 1774.54 1
 -2 10 -5 77309.6 1252.1 1
 2 -10 -5 73546.7 2600.45 1
 2 10 -6 44745.2 1530.26 1
 2 10 6 46641.8 2365.91 1
 -2 10 -6 44199.1 1105.2 1
 -2 -10 -6 46161.5 1871.64 1
 2 -10 -6 47458.4 2240.73 1
 2 -10 -7 148090 4193.32 1
 -2 10 -7 147371 2296.47 1
 -2 -10 -7 147994 3584.19 1
 2 10 -7 148354 2966.07 1
 2 10 -8 10506.7 896.028 1
 -2 10 -8 9756.89 676.243 1
 -2 10 -9 13981 1059.03 3
 -2 10 -9 13642.3 1112.74 6
 2 10 -9 13763.5 1090.37 3
 -2 -10 -9 13070.1 1032.58 3
 2 10 -10 3802.7 661.603 3
 -2 10 -10 4012.46 681.674 3
 -2 -10 -10 3670.35 632.504 3
 -2 10 -10 4620.78 763.897 6
 -2 10 -11 908.016 585.31 3
 -2 -10 -11 729.759 422.177 3
 2 10 -11 617.502 530.739 6
 2 10 -11 906.88 411.694 3
 -2 10 -11 697.874 448.608 6
 -2 -10 -12 940.186 500.313 3
 -2 10 -12 832.3 415.527 3
 2 10 -12 1123.99 606.371 6
 2 -10 -12 1013.43 556.367 3
 -2 10 -12 962.415 535.193 6
 -2 10 -13 19890.3 1522.68 3
 -2 -10 -13 19883.7 1636.06 3
 2 -10 -13 14470.5 1329.59 3
 2 10 -13 19562.6 1568.76 6
 -2 10 -13 19666.9 1573.18 6
 2 10 -13 19572.3 1584.26 3
 -2 10 -14 17332 1505.57 6
 2 -10 -14 11989.1 1338.45 3
 -2 -10 -14 14129.2 1381.38 3
 2 10 -14 18046 1559 3
 -2 10 -14 16915.8 1497.46 3
 2 10 -14 16078.6 1438.21 6
 2 10 -15 28127.6 1939.22 3
 -2 -10 -15 30356.3 1951.31 3
 2 -10 -15 26946.5 2002.97 3
 2 10 -15 26458.2 1775.3 6
 -2 -10 -16 51299.9 2467.61 3
 2 10 -16 50018.6 2555.8 3
 2 -10 -16 46529 2557.48 3
 2 10 -17 9010.91 1095.46 3
 2 -10 -17 8956.54 1168.13 3
 -2 -10 -17 9346.74 1187.32 5
 2 10 -18 4262.11 769.538 3
 -2 -10 -18 4940.05 864.644 5
 2 -10 -18 4129.92 793.513 3
 2 -10 -19 1415.18 498.557 3
 -2 -10 -19 1092.02 514.932 5
 -2 -10 -20 1303.15 467.994 5
 2 -10 -20 817.505 401.165 5
 2 12 0 55091.6 1297.92 1
 -2 -12 0 54991.3 1069.23 1
 2 12 -1 5011.9 342.141 1
 2 -12 -1 4600.32 536.122 1
 2 12 1 5105.8 545.791 1
 -2 -12 -1 4438.49 396.774 1
 2 12 -2 3145.09 224.243 1
 -2 -12 -2 3420.94 413.246 1
 2 12 2 3814.6 542.931 1
 2 -12 -2 3053.55 547.166 1
 2 12 3 7818.63 815.822 1
 2 -12 -3 8010.53 833.945 1
 -2 -12 -3 8199.83 683.759 1
 2 -12 -4 57863.4 2145.65 1
 2 12 4 54583.9 2206.28 1
 2 12 -4 56563.9 1182.05 1
 -2 -12 -4 56917.6 1812.37 1
 2 -12 -5 21543 1483.97 1
 -2 -12 -5 22499.5 1269.8 1
 2 12 5 23155.3 1616.27 1
 2 12 -5 22666.2 850.255 1
 2 -12 -6 186389 4455.71 1
 2 12 -6 184253 2646.38 1
 -2 -12 -6 184415 3785.72 1
 -2 12 -6 195539 2018.32 1
 -2 -12 -7 42719.3 2006.03 1
 2 -12 -7 44076.8 2324.8 1
 2 12 -7 44742.1 1461.02 1
 -2 12 -7 45976.6 1144.81 1
 -2 12 -8 5545.96 755.501 6
 -2 12 -8 6332.64 657.146 3
 -2 12 -9 2182.29 552.773 3
 -2 12 -9 1501.76 486.821 6
 2 12 -9 1587.11 493.575 3
 -2 -12 -9 1342.82 439.386 3
 2 12 -10 9334.2 1108.84 6
 2 12 -10 10237.8 1039.98 3
 -2 12 -10 10686 1000.95 3
 -2 12 -10 9591.25 1067.22 6
 -2 -12 -10 9095.16 934.408 3
 2 12 -11 1007.36 587.805 6
 2 12 -11 1578.32 529.414 3
 -2 12 -11 816.354 505.951 6
 -2 12 -11 1660.26 574.312 3
 -2 -12 -11 1427.48 490.428 3
 -2 12 -12 342.582 401.735 6
 2 12 -12 283.061 552.46 6
 2 -12 -12 -91.4174 440.784 3
 -2 12 -12 171.965 371.385 3
 2 12 -12 -99.9706 436.22 3
 -2 -12 -12 550.538 402.31 3
 2 12 -13 3870.45 676.514 6
 -2 12 -13 5772.21 927.399 6
 -2 12 -13 8024.19 1016.27 3
 2 12 -13 6172.4 910.988 3
 2 -12 -13 4534.7 753.698 3
 -2 -12 -13 5818.68 877.119 3
 2 -12 -14 1908.33 765.641 3
 2 12 -14 740.841 512.423 6
 -2 12 -14 391.666 434.463 6
 2 12 -14 1144.41 567.651 3
 -2 -12 -14 866.639 470.444 3
 -2 -12 -15 21809.9 1605.18 3
 2 12 -15 20554.1 1623.31 6
 -2 12 -15 21724.1 1665.43 6
 2 12 -15 24259.2 1736.93 3
 2 -12 -15 20986.2 1745.02 3
 2 12 -16 12568.1 1256.28 3
 2 -12 -16 11844 1305.18 3
 -2 -12 -16 11221.3 1181.81 3
 2 12 -16 13683.3 1314.34 6
 2 12 -17 2011.77 553.116 3
 2 -12 -17 2110.78 674.445 3
 -2 -12 -17 1561.92 578.353 5
 -2 -12 -18 5598.16 908.411 5
 2 -12 -18 5408.65 831.657 3
 2 -12 -19 -198.659 303.168 3
 -2 -12 -19 -454.646 390.013 5
 -2 -12 -20 -53.7242 324.06 5
 2 -12 -20 -94.4041 364.091 5
 2 14 0 322810 3425.14 1
 -2 -14 0 321264 2657.93 1
 2 14 -1 -13.0034 214.45 1
 2 14 1 356.027 288.614 1
 -2 -14 -1 495.493 214.413 1
 2 -14 1 213.768 141.3 1
 2 -14 -1 279.874 296.715 1
 2 -14 -2 1056.52 413.633 1
 2 14 2 1238.33 443.17 1
 -2 -14 -2 845.762 261.027 1
 2 14 -2 701.931 131.169 1
 2 14 3 12873.5 1064.62 1
 -2 -14 -3 12553.1 847.748 1
 2 -14 -3 12955.7 1032.32 1
 2 -14 -4 6448.16 832.012 1
 -2 -14 -4 6282.16 688.667 1
 2 14 4 6657.5 879.808 1
 2 14 -5 33721.6 598.724 1
 2 14 -5 31826.2 658.238 1
 -2 -14 -5 37792.3 1646.83 1
 2 -14 -5 37902.7 1915.64 1
 -2 -14 -6 5291.57 742.017 1
 2 -14 -6 4952.14 872.048 1
 2 14 -6 5294.12 357.511 1
 -2 14 -7 13861.8 1095.72 6
 -2 14 -8 11372.3 864.038 3
 -2 14 -8 11997 1071.91 6
 -2 14 -9 71158.6 2658.29 6
 -2 14 -9 71224.3 2286.25 3
 -2 -14 -9 68146.5 2212.48 3
 2 14 -9 73781.4 2417.65 3
 -2 -14 -10 2089.57 501.632 3
 -2 14 -10 2261.45 564.198 6
 2 14 -10 2910.24 640.269 3
 2 14 -10 3238.63 764.899 6
 -2 14 -10 2283.12 518.001 3
 2 14 -11 27614.5 1895.64 6
 -2 14 -11 27792 1845.63 6
 2 14 -11 27848.2 1701.21 3
 -2 -14 -11 25815.5 1605.94 3
 -2 14 -11 29475.3 1667.32 3
 -2 14 -12 -55.5746 474.822 6
 2 -14 -12 415.878 500.936 3
 2 14 -12 635.975 578.432 6
 2 14 -12 -960.456 584.015 3
 -2 -14 -12 -233.198 371.171 3
 -2 14 -13 10105.1 1309.77 6
 -2 -14 -13 12038.3 1185.82 3
 2 14 -13 9656.55 1048.51 3
 2 14 -13 9216.8 1149.66 6
 2 14 -14 2628.58 624.013 3
 -2 -14 -14 2957.76 712.626 3
 2 -14 -14 3337.95 804.179 3
 -2 14 -14 3302.06 766.497 6
 2 14 -14 3047.99 743.41 6
 -2 -14 -15 537.624 502.475 3
 2 -14 -15 513.034 450.891 3
 2 14 -15 530.494 432.662 6
 -2 14 -15 572.236 496.582 6
 2 14 -15 1162.05 547.407 3
 2 14 -16 2068.44 566.76 3
 2 14 -16 981.974 455.49 6
 -2 -14 -16 137.203 345.709 3
 -2 14 -16 1416.32 507.63 6
 2 -14 -16 1285.36 571.239 3
 -2 -14 -16 1078.43 733.849 5
 2 -14 -17 1168.62 499.663 3
 -2 -14 -17 462.044 585.365 5
 2 -14 -18 6721.82 864.421 3
 -2 -14 -18 8818.85 1070.82 5
 -2 -14 -19 989.156 500.222 5
 2 -14 -19 1513.4 632.105 5
 2 -14 -20 8346.78 832.701 5
 -2 -14 -20 7631.42 777.264 5
 2 -16 0 110358 1839.25 1
 -2 -16 0 113474 1611.5 1
 2 -16 1 613.13 125.142 1
 -2 -16 -1 569.403 213.631 1
 2 16 1 1328.49 443.088 1
 2 -16 -1 1016.81 356.685 1
 -2 -16 -2 3414.63 445.769 1
 2 -16 -2 3596.09 527.415 1
 2 16 2 3643.25 643.164 1
 -2 -16 -3 4460.76 530.171 1
 2 -16 -3 4597.33 653.766 1
 2 -16 -4 20119.8 1334.12 1
 -2 -16 -4 22117 1219.64 1
 2 -16 -5 46582.9 2196.57 1
 -2 -16 -5 48153.6 1925.73 1
 2 -16 -6 3322.83 689.123 1
 -2 16 -6 3777.23 598.072 6
 -2 -16 -6 3878.4 661.117 1
 -2 16 -7 21187.2 1374.04 6
 -2 16 -8 16841.3 1323.94 6
 -2 16 -9 56547.4 2489.86 6
 2 16 -9 59882.1 2160.5 3
 2 16 -9 56242.8 2593.24 6
 -2 16 -10 537.691 606.193 6
 2 16 -10 625.776 543.7 6
 2 16 -10 802.68 432.896 3
 -2 16 -11 35654.5 2156.46 6
 2 16 -11 35152.1 2193.66 6
 -2 -16 -11 34864.9 1842.81 3
 2 16 -12 2913.11 697.189 6
 -2 -16 -12 2908.92 664.281 3
 2 -16 -12 3042.29 748.76 3
 2 16 -12 2631.45 593.446 3
 -2 16 -12 2045.44 619.849 6
 2 -16 -13 2625.31 720.398 3
 2 16 -13 1606.74 519.774 3
 -2 16 -13 2762.04 684.546 6
 2 16 -13 2095.75 639.974 6
 -2 -16 -13 3831.62 767.344 3
 2 16 -14 533.927 455.731 6
 -2 16 -14 1053.58 584.613 6
 2 16 -14 471.701 424.883 3
 -2 -16 -14 208.285 389.356 3
 2 -16 -14 930.572 559.504 3
 -2 -16 -15 2368.64 606.183 3
 2 16 -15 2492.73 707.533 6
 2 16 -15 4161.14 813.395 3
 -2 -16 -15 3698.49 945.019 5
 2 -16 -15 2755.97 702.577 3
 -2 16 -15 3115 792.149 6
 2 16 -16 -83.0282 352.707 6
 2 -16 -16 933.017 565.36 3
 -2 16 -16 807.419 435.582 6
 -2 -16 -16 548.258 677.822 5
 2 -16 -17 2175.17 563.953 3
 2 16 -17 1806.97 533.388 6
 -2 -16 -17 1740.38 675.139 5
 -2 -16 -18 11560.9 1120.19 5
 2 -16 -18 9841.93 982.28 3
 -2 -16 -19 3706.69 649.11 5
 2 -16 -19 3078.33 635.205 5
 2 -16 -20 26466.5 1366.88 5
 -2 -16 -20 27496.8 1386.2 5
 2 -18 0 7904.87 495.284 1
 2 -18 -1 2064.74 390.307 1
 -2 -18 -1 2036.96 314.379 1
 -2 -18 -2 10337.5 693.006 1
 2 -18 -2 9325.26 797.817 1
 -2 -18 -3 675.155 295.407 1
 2 -18 -3 1133.46 389.022 1
 2 -18 -4 75249.9 2616.06 1
 -2 -18 -4 77001.4 2276.03 1
 -2 18 -5 213.999 326.704 6
 2 -18 -5 492.696 438.475 1
 -2 -18 -5 1086.86 451.74 1
 -2 18 -5 877.904 476.587 4
 -2 18 -6 2275.05 634.433 4
 -2 18 -6 2706.14 582.913 6
 -2 18 -7 28644.9 1705.16 6
 -2 18 -8 11505.4 1191.48 6
 2 18 -8 11511 1221.67 6
 2 18 -9 150982 4336.45 6
 -2 18 -9 148259 4084.14 6
 2 18 -10 5094.08 916.956 6
 -2 18 -10 4306.57 811.203 6
 -2 18 -11 63581 2915.01 6
 2 18 -11 62760.4 2401.81 3
 2 18 -12 167.847 475.964 6
 -2 18 -12 -18.8195 413.596 6
 2 18 -12 -314.458 385.92 3
 2 -18 -12 45.6191 443.992 3
 2 18 -13 18825.1 1372.76 3
 2 18 -13 21765.6 1828.16 6
 -2 18 -13 19463.4 1754.67 6
 2 -18 -13 20045.3 1584.83 3
 -2 -18 -14 2232.43 719.279 5
 2 18 -14 1769.17 650.955 6
 -2 18 -14 1597.39 674.041 6
 2 18 -14 2808.76 651.347 3
 2 -18 -14 1812.39 615.557 3
 -2 18 -15 80.7978 472.318 6
 2 -18 -15 -579.374 411.165 3
 2 18 -15 -253.578 444.618 6
 -2 -18 -15 -507.303 593.375 5
 2 -18 -16 1011.91 481.185 3
 -2 -18 -16 443.348 642.278 5
 -2 18 -16 556.096 443.586 6
 2 18 -16 1187.05 488.987 6
 -2 -18 -17 2191.96 671.981 5
 2 18 -17 1432.73 565.271 6
 2 -18 -17 1107.21 497.366 3
 -2 -18 -18 20177.3 1416.64 5
 2 -18 -18 21240 1459.93 5
 2 -18 -19 1235.3 446.25 5
 -2 -18 -19 1782.27 536.417 5
 2 -20 0 64749.8 1197.53 1
 -2 -20 -1 4130.72 371.222 1
 2 -20 -1 3961.16 415.213 1
 2 -20 -2 823.243 349.401 1
 -2 -20 -2 526.512 230.849 1
 -2 20 -3 4130.33 680.402 4
 2 -20 -3 3248.39 568.258 1
 -2 -20 -3 3566.7 536.523 1
 -2 20 -4 2797.21 574.659 4
 -2 -20 -4 2468.19 447.991 1
 2 -20 -4 2996.84 579.996 1
 -2 20 -4 2794.21 471.081 6
 -2 -20 -5 2149.57 496.92 1
 2 -20 -5 3186.4 694.54 1
 -2 20 -5 3022.92 606.219 6
 -2 20 -5 2252.53 566.845 4
 2 20 -6 3649.29 714.328 6
 -2 20 -6 3390.38 625.644 6
 2 20 -6 3653.51 694.881 4
 -2 20 -6 3339.48 772.173 4
 -2 -20 -6 2840.74 493.701 5
 2 20 -7 6034.47 915.363 6
 -2 20 -7 6011.86 874.665 6
 -2 20 -8 2176.04 768.952 6
 2 20 -8 1342.79 564.434 6
 2 20 -9 56097.6 2763.29 6
 -2 20 -9 56296.7 2634.8 6
 -2 20 -10 3701.89 853.414 6
 2 20 -10 2895.86 781.836 6
 2 20 -11 15796.4 1655.58 6
 -2 20 -11 12608.3 1421.63 6
 2 20 -12 3013.77 905.698 6
 -2 20 -12 1571.36 660.117 6
 -2 20 -13 596.477 639.729 6
 2 20 -13 1003.82 539.186 6
 -2 -20 -13 36.0964 538.438 5
 -2 20 -14 1679.12 567.457 6
 2 20 -14 1752.51 687.877 6
 -2 -20 -14 1875.11 749.497 5
 2 20 -15 2813.39 728.535 6
 -2 20 -15 3412.15 746.122 6
 -2 -20 -15 4015.38 891.535 5
 -2 -20 -16 1499.43 553.274 5
 -2 20 -16 1225.73 548.322 6
 2 20 -16 966.113 455.497 6
 2 20 -17 499.446 326.148 6
 2 -20 -17 -607.209 437.7 5
 -2 -20 -17 -599.276 509.948 5
 -2 -20 -18 7967.63 910.606 5
 2 20 -18 6088.43 803.123 6
 2 -20 -18 7594.75 883.749 5
 -2 -20 -19 2009.49 449.259 5
 2 -20 -19 1655.27 439.145 5
 -2 22 0 30908.5 1648.07 4
 -2 22 -1 683.652 389.464 4
 -2 22 1 363.258 420.875 4
 2 22 -1 615.232 376.572 4
 2 22 -2 1656.46 514.735 4
 -2 22 -2 1831.3 553.238 4
 2 22 -3 1990.18 482.924 6
 -2 22 -3 1576.18 517.926 4
 -2 22 -3 1667.47 418.459 6
 2 22 -3 1777.28 486.829 4
 2 22 -4 5420.62 770.293 4
 -2 -22 -4 5058.53 647.23 1
 2 22 -4 5577.66 778.285 6
 -2 22 -4 5183.33 766.752 4
 -2 22 -4 5374.77 666.291 6
 2 -22 -4 5010.06 747.494 1
 -2 22 -5 37157 2049.6 4
 2 22 -5 39146.6 2025.51 6
 2 22 -5 37086.8 1989.52 4
 -2 22 -5 37424.9 1892.78 6
 2 22 -6 17448 1409.43 4
 -2 22 -6 16715.7 1466.29 4
 2 22 -6 15986.1 1396.24 6
 -2 22 -6 17478.6 1346.18 6
 -2 -22 -6 16948.2 1054.39 5
 -2 22 -7 12797 1227.87 6
 -2 -22 -7 11943.5 994.29 5
 2 22 -7 14054.7 1359.21 6
 -2 -22 -8 1313.88 480.804 5
 2 22 -8 1527.06 627 6
 -2 22 -8 1743.97 612.498 6
 -2 22 -9 1392.36 653.295 6
 -2 -22 -9 445.994 470.487 5
 2 22 -9 -528.01 538.963 6
 -2 22 -10 1555.95 610.069 6
 -2 -22 -10 1742.02 653.348 5
 2 22 -10 2199.72 782.911 6
 -2 22 -11 18599 1711.8 6
 2 22 -11 18800.6 1748.03 6
 -2 -22 -11 14636.5 1303.5 5
 -2 22 -12 5900.41 1060.35 6
 -2 -22 -12 4924.39 896.944 5
 2 22 -12 5427.26 1015.18 6
 -2 -22 -13 666.925 597.585 5
 2 22 -13 1886.04 713.029 6
 -2 22 -13 1131.57 602.287 6
 -2 -22 -14 4097.11 859.331 5
 -2 22 -14 4877.27 879.213 6
 2 22 -14 5369.42 992.896 6
 -2 -22 -15 9507.84 1163.77 5
 -2 22 -15 9719.54 1223.55 6
 2 22 -15 9070.49 1177.49 6
 -2 -22 -16 9804.97 1092.39 5
 2 22 -16 9586.44 1175.33 6
 -2 -22 -17 2450.08 614.781 5
 2 22 -17 1617.59 471.358 6
 2 -22 -17 1656.5 554.024 5
 -2 -22 -18 1212.34 433.267 5
 2 -22 -18 -407.45 373.415 5
 2 24 0 10099 1063.77 4
 -2 24 0 11005.9 1055.8 4
 -2 24 1 995.547 510.709 4
 -2 24 -1 275.172 381.638 4
 2 24 -1 10.432 388.227 4
 -2 24 -1 201.341 306.43 6
 2 24 -2 14547.4 1117.51 6
 2 24 -2 15968.3 1294.2 4
 -2 24 -2 14241.3 1193.25 4
 -2 24 -2 15012.2 1128.58 6
 2 24 -3 20841.3 1432.93 6
 2 24 -3 19726.4 1649.61 7
 -2 24 -3 20656.9 1515.57 4
 -2 24 -3 22114.2 1381.87 6
 2 24 -3 20215.3 1472.1 4
 -2 24 -4 77413.9 2995.22 4
 -2 24 -4 76652.3 2714.62 6
 2 24 -4 79419.1 2834.63 6
 2 24 -4 74990.4 2875.3 4
 -2 24 -5 63223.7 2569.78 6
 -2 24 -5 60459.4 2756.3 4
 2 24 -5 59218.6 2610.28 4
 2 24 -5 63230.4 2648.12 6
 2 24 -6 72465.9 2924.39 6
 2 24 -6 76305.5 3059.08 4
 -2 24 -6 75676.2 2863.99 6
 -2 24 -6 76802.6 3261.19 4
 -2 24 -7 37359.4 2139.92 6
 2 24 -7 38792.8 2250.85 6
 -2 -24 -7 36960.4 1644.56 5
 2 24 -8 5780.06 937.623 6
 -2 24 -8 5961.36 958.493 6
 -2 -24 -8 6226.98 796.117 5
 -2 24 -9 5332.23 998.104 6
 -2 -24 -9 4621.5 767.819 5
 2 24 -9 4215.03 897.899 6
 -2 24 -10 2172.08 750.96 6
 2 24 -10 1815.87 688.424 6
 -2 -24 -10 2915.14 737.624 5
 2 24 -11 3365.97 883.408 6
 -2 24 -11 2930.79 809.392 6
 -2 -24 -11 4084.73 871.434 5
 -2 24 -12 3707.92 992.922 6
 2 24 -12 2840.62 858.171 6
 -2 -24 -12 2529.73 735.965 5
 -2 24 -13 31576.2 2220.71 6
 -2 -24 -13 30879.8 1933.79 5
 2 24 -13 29758.1 2166.74 6
 -2 -24 -14 4453.59 830.324 5
 -2 24 -14 4634.9 916.533 6
 2 24 -14 3092.24 770.471 6
 2 -24 -15 23854.1 1699.94 5
 -2 24 -15 24330.7 1845.95 6
 -2 -24 -15 23884.9 1644.86 5
 2 24 -15 24261.9 1809.88 6
 2 -24 -16 18148.6 1394.01 5
 2 24 -16 17198.3 1456.05 6
 -2 -24 -16 18071.4 1402.43 5
 2 -24 -17 2695.51 581.005 5
 -2 -24 -17 2813.47 643.455 5
 2 24 -17 3473.09 643.924 6
 2 -24 -18 2909.72 536.604 5
 -2 -24 -18 2999.1 516.3 5
 -2 26 0 3531.08 675.834 4
 2 26 0 3848.28 706.18 4
 2 26 -1 447.418 464.97 4
 -2 26 -1 400.317 401.895 4
 -2 26 1 632.806 439.003 4
 -2 26 -1 540.208 330.12 6
 -2 26 2 14175.3 1360.76 4
 -2 26 -2 14717.2 1339.94 4
 2 26 -2 14943.2 1308.05 4
 2 26 -2 14306 1130.38 6
 -2 26 -2 15299.8 1164.65 6
 -2 26 -3 7126.96 1047.97 4
 -2 26 -3 7004.07 845.789 6
 2 26 -3 7670.86 944.263 6
 2 26 -3 7118.59 949.391 4
 -2 26 -4 91181.7 3015.16 6
 2 26 -4 88013.1 3264.21 4
 2 26 -4 89171.6 3099.16 6
 -2 26 -4 89574.8 3327.32 4
 2 26 -5 78208 3035.73 6
 -2 26 -5 73706 3159.2 4
 2 26 -5 75388.8 3079.74 4
 -2 26 -5 77719.2 2921.04 6
 -2 26 -6 36046.1 2116.4 6
 2 26 -6 37679.6 2200.51 6
 -2 26 -6 34397.8 2319.25 4
 2 26 -6 35741.7 2219.12 4
 -2 26 -7 91161.9 3450.08 6
 2 26 -7 98650.6 3616.33 6
 -2 26 -8 1778.93 612.299 6
 2 26 -8 1300.59 492.483 6
 -2 26 -9 -292.411 494.558 6
 2 26 -9 1073.16 585.196 6
 -2 -26 -9 723.782 466.214 5
 -2 -26 -10 1824.44 584.103 5
 2 26 -10 1190.5 685.491 6
 -2 26 -10 2523.36 879.679 6
 -2 26 -11 13137.5 1506.47 6
 2 26 -11 11645.7 1434.33 6
 -2 -26 -11 14521.1 1296.09 5
 -2 26 -12 2540.46 770.053 6
 2 26 -12 3626.94 1032.12 6
 -2 -26 -12 2511.26 663.126 5
 -2 26 -13 12211 1399.9 6
 -2 -26 -13 10493.2 1092.21 5
 2 26 -13 11120.4 1376.52 6
 2 -26 -14 22291.6 1631.55 5
 2 26 -14 23169.4 1876.86 6
 -2 26 -14 22359.5 1867.05 6
 -2 -26 -14 21657.8 1564.53 5
 -2 -26 -15 31374.2 1802.72 5
 -2 26 -15 34285.7 2145.8 6
 2 -26 -15 30496.3 1784.66 5
 2 26 -15 31592.6 2017.58 6
 2 26 -16 33132.7 1928.8 6
 2 -26 -16 34156.5 1746.63 5
 -2 -26 -16 33605 1729.67 5
 2 -26 -17 6592.26 714.976 5
 2 26 -17 7140.36 870.674 6
 -2 -26 -17 8254.36 853.829 5
 2 28 0 293.366 425.365 4
 -2 28 0 186.94 427.548 4
 2 28 1 1202.73 596.002 4
 -2 28 1 1062.25 556.625 4
 2 28 -1 928.244 491.899 4
 -2 28 -1 1038.24 532.298 4
 2 28 -2 19809.9 1383.75 6
 -2 28 -2 20372.2 1573.19 4
 -2 28 2 18813.4 1606.86 4
 -2 28 -2 19031.3 1351.4 6
 2 28 -2 20583 1611.51 4
 -2 28 3 18495.1 1675.56 4
 -2 28 -3 18263.8 1400.09 6
 2 28 -3 19209.9 1467.84 6
 2 28 -3 18636.4 1564.23 4
 -2 28 -3 20199.1 1650.97 4
 -2 28 -4 73794.9 2842.87 6
 -2 28 -4 76661.1 3178.69 4
 2 28 -4 73086.1 3121.08 4
 2 28 -4 75942 2949.3 6
 -2 28 -5 20256.3 1777.39 4
 2 28 -5 20386.5 1635.58 6
 -2 28 -5 19721.8 1580.97 6
 2 28 -5 22602.4 1875.77 4
 2 28 -6 35816.1 2340 4
 -2 28 -6 35589.3 2106.65 6
 2 28 -6 34634.4 2199.62 6
 -2 28 -6 34786.3 2428.89 4
 2 28 -7 20045.4 1710.99 6
 -2 28 -7 19436.8 1683.42 6
 2 28 -8 2470.42 752.25 6
 -2 28 -8 2427.65 733.6 6
 -2 28 -9 1406.06 617.193 6
 2 28 -9 630.857 592.335 6
 2 28 -10 402.027 598.983 6
 -2 28 -10 428.85 501.613 6
 -2 -28 -10 478.028 484.674 5
 2 28 -11 3348.75 909.44 6
 -2 -28 -11 4670.76 799.751 5
 -2 28 -11 4264.42 1007.67 6
 2 28 -12 1332.72 747.866 6
 -2 -28 -12 1094.96 471.274 5
 -2 28 -12 2100.77 736.728 6
 2 28 -13 26563.5 1991.32 6
 -2 -28 -13 27295.3 1722.42 5
 2 -28 -13 28428.4 1794.3 5
 -2 28 -13 25071.9 1951.24 6
 -2 28 -14 9639.73 1233.66 6
 2 -28 -14 10030.6 1024.76 5
 -2 -28 -14 10115.4 1132.32 5
 2 28 -14 9925.51 1215.14 6
 2 28 -15 37230.6 2158.64 6
 2 -28 -15 36950.1 1792.76 5
 -2 -28 -15 36707.4 1850.36 5
 2 -28 -16 12511.3 984.339 5
 -2 -28 -16 13072.1 1064.49 5
 2 28 -16 13286.6 1195.97 6
 2 30 0 25643.6 1848.74 4
 -2 30 0 26761.6 1838.75 4
 -2 30 -1 1817.03 667.897 4
 2 30 -1 2003.05 557.293 4
 2 30 1 1537.5 612.65 4
 -2 30 1 1425.03 645.034 4
 -2 30 -2 -88.5149 359.182 6
 2 30 2 528.815 589.022 4
 2 30 -2 418.806 521.204 4
 -2 30 -2 509.233 556.855 4
 -2 30 2 -284.182 538.588 4
 2 30 -3 1538.61 487.681 6
 2 30 -3 2993.93 753.961 4
 -2 30 -3 2793.96 750.639 4
 -2 30 3 1996.89 647.416 4
 -2 30 -3 1559.51 499.399 6
 2 30 -4 6528.98 920.758 6
 -2 30 -4 8307.96 1040.51 6
 -2 30 4 8147.96 1289.29 4
 -2 30 -4 6004.74 950.175 4
 2 30 -4 8665.92 1192.66 4
 2 30 -5 19953.3 1637.32 6
 2 30 -5 18562.9 1663.18 4
 -2 30 -5 20102.7 1677.49 6
 -2 30 -5 15315.6 1599.46 4
 -2 30 -6 5087.62 1095.14 4
 2 30 -6 6254.37 985.638 6
 2 30 -6 6546.52 1122.29 4
 -2 30 -6 7172.45 1086.71 6
 2 30 -7 576.35 502.753 6
 -2 30 -7 1226.36 639.673 6
 -2 30 -8 239.562 536.755 6
 2 30 -8 201.174 487.297 6
 -2 30 -9 16218.4 1629.53 6
 2 30 -9 15261.4 1608.04 6
 2 30 -10 -243.71 560.353 6
 -2 30 -10 726.699 506.175 6
 2 30 -11 9734.45 1334.69 6
 -2 30 -11 10870.8 1355.73 6
 2 30 -12 -186.081 494.134 6
 -2 30 -12 -297.213 509.551 6
 2 30 -13 9914.83 1242.33 6
 -2 30 -13 9902.65 1222.05 6
 2 30 -14 5683.82 950.815 6
 2 30 -15 9044.82 1061.87 6
 2 30 -16 9173.14 955.319 6
 -2 32 0 83573.8 3281.19 4
 2 32 0 83665.8 3337.12 4
 -2 32 -1 2800.41 849.639 4
 2 32 -1 3009.91 794.594 4
 2 32 1 1306.74 658.572 4
 -2 32 1 1905.13 768.35 4
 -2 32 2 11035.5 1336.13 4
 2 32 -2 12736.8 1441.36 4
 2 32 2 9023.1 1210.49 4
 -2 32 -2 7969.68 1081.92 4
 -2 32 -3 6111.08 1055.45 4
 2 32 -3 5396.47 811.908 6
 -2 32 3 6676.61 1128.53 4
 2 32 3 5482.6 1100.5 4
 2 32 -3 7503.87 1083.43 4
 -2 32 -3 5431.98 884.425 6
 -2 32 -4 133.672 531.496 4
 2 32 -4 428.327 434.082 6
 -2 32 4 660.388 640.727 4
 2 32 -4 89.8971 550.73 4
 -2 32 -4 628.253 472.826 6
 -2 32 -5 1435.8 589.066 6
 -2 32 5 1625.95 809.432 4
 -2 32 -5 283.668 576.579 4
 2 32 -5 879.507 756.418 4
 2 32 -5 584.33 425.292 6
 2 32 -6 4853.93 895.649 6
 -2 32 -6 4949.43 1201.65 4
 -2 32 -6 3770.73 801.719 6
 -2 32 -7 -343.484 517.784 6
 2 32 -7 -93.7878 557.665 6
 -2 32 -8 6579.87 1111.78 6
 2 32 -8 6494.82 1070.45 6
 -2 32 -9 54520.4 2860.39 6
 2 32 -9 54391.8 2874.6 6
 2 32 -10 1983.89 756.46 6
 -2 32 -10 911.2 627.36 6
 2 32 -11 42231.9 2536.22 6
 -2 32 -11 44620.5 2639.52 6
 2 32 -12 2333.02 716.523 6
 -2 32 -12 1565.56 627.695 6
 2 32 -13 2668.11 738.187 6
 2 32 -14 1057.93 564.1 6
 2 32 -15 1013.15 459.948 6
 -2 34 0 137486 4384.81 4
 2 34 0 104913 3780.31 4
 2 34 -1 1866.02 705.149 4
 -2 34 1 4677.35 1042.24 4
 2 34 1 2697.02 783.877 4
 -2 34 -1 3231.71 892.123 4
 -2 34 2 118312 4092.26 4
 2 34 -2 125427 4309.82 4
 2 34 2 89336.5 3655.82 4
 -2 34 -2 100474 3791.09 4
 -2 34 -3 1100.2 744.021 4
 2 34 -3 1592.66 794.375 4
 -2 34 3 865.281 729.291 4
 2 34 -4 865.732 417.214 6
 -2 34 4 1942.41 785.896 4
 2 34 4 3552.36 1156.79 4
 2 34 -4 1059.6 694.376 4
 -2 34 -4 2384.83 879.932 4
 -2 34 -4 1263.99 531.268 6
 -2 34 -5 5536.66 1208.85 4
 -2 34 -5 3508.07 765.109 6
 -2 34 5 4767.6 1149.98 4
 2 34 -5 3403.7 744.512 6
 2 34 -5 4209.58 1062.76 4
 -2 34 6 1772.06 820.04 4
 2 34 -6 1323.84 562.701 6
 -2 34 -6 1997.33 688.029 6
 -2 34 7 4201.6 1028.1 4
 2 34 -7 7215.5 1072.82 6
 -2 34 -7 6345.18 1024.23 6
 2 34 -8 4778.15 946.917 6
 -2 34 -8 5035.2 938.6 6
 -2 34 -9 94133.6 3742.48 6
 2 34 -9 97063.2 3785.24 6
 2 34 -10 2284.08 751.104 6
 -2 34 -10 2771.73 790.227 6
 -2 34 -11 59507.7 2989.44 6
 2 34 -11 59847.6 2906.87 6
 2 34 -12 3009.66 722.039 6
 2 34 -13 15517.5 1408.6 6
 -2 34 13 15813.1 1622.98 4
 -2 34 14 2070.96 632.207 4
 2 34 -14 2515.15 629.477 6
 -2 34 15 1218.08 480.996 4
 2 34 -15 1062.62 438.841 6
 2 36 0 127989 4284.98 4
 -2 36 0 127910 4246.32 4
 2 36 1 11561.6 1472.34 4
 2 36 -1 12406 1448.68 4
 -2 36 1 13333.9 1608.28 4
 -2 36 -1 12129.5 1527.41 4
 2 36 2 36633.9 2411.32 4
 2 36 -2 43376.5 2583.81 4
 -2 36 -2 40272.1 2524.17 4
 -2 36 2 34703.9 2289.39 4
 2 36 -3 8984.44 1257.58 4
 -2 36 3 8378.03 1254.8 4
 -2 36 -3 9145.06 1307.91 4
 2 36 3 6788.4 1296.14 4
 -2 36 -4 3822.49 1026.77 4
 2 36 -4 3477.34 880.46 4
 -2 36 4 2696 743.057 4
 2 36 4 2893.51 905.586 4
 2 36 -4 3914.67 741.329 6
 -2 36 5 3469.07 863.851 4
 2 36 -5 2633.98 835.445 4
 2 36 5 1497.12 722.277 4
 2 36 -5 1718.17 483.346 6
 -2 36 -5 2312.47 760.851 4
 2 36 -6 3246.84 845.752 6
 2 36 6 1520.06 817.446 4
 -2 36 6 1896.85 791.634 4
 -2 36 -7 278.335 435.533 6
 2 36 -7 5.75669 483.674 6
 -2 36 7 697.158 798.925 4
 2 36 -8 4123.04 858.734 6
 -2 36 8 5474.03 1246.45 4
 -2 36 -8 6254.5 1053.82 6
 2 36 -9 63274.2 3024.29 6
 -2 36 9 63990.3 3367.74 4
 -2 36 10 2256.18 875.683 4
 2 36 -10 1201.71 628.579 6
 2 36 -11 65744.6 2942.95 6
 -2 36 11 65730.7 3235.59 4
 2 36 -12 2717.51 742.454 6
 -2 36 12 2799.87 836.789 4
 -2 36 13 16163.9 1515.12 4
 2 36 -13 15580.8 1338.28 6
 -2 36 14 604.738 423.967 4
 2 36 14 743.537 586.8 4
 2 36 -14 1569.27 478.072 6
 -2 38 0 177285 5089.37 4
 2 38 0 173257 5050.43 4
 -2 38 1 4107.69 982.005 4
 -2 38 -1 2857.24 910.106 4
 2 38 -1 4465.46 1040.01 4
 2 38 1 4317.07 976.162 4
 -2 38 2 3930.39 870.612 4
 2 38 -2 4003.25 926.45 4
 2 38 2 4954.31 988.8 4
 -2 38 -2 5104.56 1093.1 4
 -2 38 -3 1087.06 618.852 4
 -2 38 3 960.212 618.03 4
 2 38 -3 1260.74 647.05 4
 2 38 3 1349.76 666.533 4
 -2 38 -4 2236.23 865.938 4
 2 38 4 2643.74 845.48 4
 2 38 -4 2130.34 705.792 4
 -2 38 4 2596.87 805.781 4
 -2 38 -5 2479.88 844.755 4
 2 38 5 3192.29 893.627 4
 -2 38 5 1679.29 801.524 4
 2 38 -5 2270.68 605.417 6
 -2 38 6 2436.7 799.094 4
 2 38 6 2905.11 832.515 4
 2 38 -6 5022.43 878.938 6
 -2 38 7 1098.96 767.31 4
 2 38 7 590.394 649.738 4
 2 38 -7 1051.53 563.241 6
 -2 38 8 1909.92 813.935 4
 2 38 8 718.906 868.776 4
 2 38 -8 1732.58 635.748 6
 2 38 9 24172 2163.9 4
 -2 38 9 25590.8 2041.29 4
 2 38 -9 25035.1 1830.15 6
 2 38 -10 980.779 528.977 6
 2 38 10 1820.11 937.175 4
 -2 38 10 1210.86 740.498 4
 2 38 11 23514.5 2044.37 4
 -2 38 11 23768.9 1836.59 4
 2 38 -11 22737.2 1661.06 6
 2 38 -12 1396.52 548.271 6
 -2 38 12 1920.47 689.776 4
 2 38 12 2731.26 782.873 4
 -2 38 13 985.277 519.722 4
 2 38 13 109.174 459.115 4
 -2 40 0 1104.53 674.881 4
 2 40 0 861.686 618.492 4
 -2 40 -1 1291.78 676.405 4
 -2 40 1 1565.5 693.719 4
 2 40 1 973.682 602.473 4
 2 40 -1 1108.21 664.345 4
 2 40 -2 1807.52 762.07 4
 2 40 2 1903.77 704.676 4
 -2 40 2 1549.23 729.367 4
 -2 40 -2 1158.01 709.677 4
 -2 40 3 3382.29 917.501 4
 2 40 3 3959.45 901.253 4
 -2 40 -3 2697.13 873.411 4
 2 40 -3 3393.15 821.206 4
 2 40 -4 13022.9 1570.06 4
 -2 40 4 12651.3 1461.63 4
 2 40 4 13023.4 1519.98 4
 -2 40 -4 12850.2 1494.08 4
 -2 40 5 16523.1 1631.92 4
 2 40 5 14057.3 1610.25 4
 2 40 -6 10565.4 1168.86 6
 2 40 6 9446.12 1400.94 4
 -2 40 6 9701.04 1349.3 4
 2 40 -7 3807.63 746.563 6
 -2 40 7 3744.49 862.208 4
 2 40 7 4109.08 1002.95 4
 2 40 -8 1095.53 484.501 6
 2 40 8 433.973 699.735 4
 -2 40 8 19.0913 563.791 4
 2 40 -9 3134.37 683.152 6
 2 40 9 2848.49 863.673 4
 -2 40 9 3460.13 847.342 4
 2 40 10 1036.46 651.354 4
 -2 40 10 473.37 540.501 4
 2 40 -10 50.8989 349.904 6
 2 40 11 1734.93 636.397 4
 -2 40 11 2398.75 655.679 4
 2 40 12 312.457 405.554 4
 -2 40 12 812.517 480.114 4
 -2 42 0 2526.98 757.814 4
 2 42 0 1675.87 629.404 4
 -2 42 1 1456.15 671.449 4
 -2 42 -1 1056.28 657.272 4
 2 42 1 2443.61 800.41 4
 2 42 -1 1679.07 745.111 4
 -2 42 -2 5074.81 993.722 4
 -2 42 2 6444.12 1086.78 4
 2 42 2 5974.98 1074.77 4
 2 42 -2 6021.53 1109.23 4
 2 42 3 4772.53 931.218 4
 -2 42 3 4984.26 957.05 4
 2 42 -3 3231.95 791.427 4
 -2 42 -3 4181.87 940.526 4
 2 42 4 39235.1 2425.14 4
 -2 42 4 41339.4 2447.53 4
 2 42 5 27179.9 2039.07 4
 -2 42 5 27302.2 1993.12 4
 2 42 6 13839.2 1480.57 4
 -2 42 6 15392.4 1503 4
 2 42 7 17958.9 1655.96 4
 -2 42 7 18898.8 1614.07 4
 -2 42 8 2354.63 684.316 4
 2 42 8 2679.67 761.665 4
 -2 42 9 262.407 441.552 4
 2 42 9 15.4583 488.526 4
 2 42 10 -1371.68 559.79 4
 -2 42 10 36.7948 393.143 4
 -2 42 11 2674.59 628.741 4
 2 42 11 2153.17 608.136 4
 2 44 0 1252.27 609.477 4
 -2 44 0 1116.64 684.717 4
 2 44 -1 492.269 472.138 4
 -2 44 1 -290.053 461.857 4
 2 44 1 1126.97 662.523 4
 -2 44 -1 -1122.8 696.065 4
 2 44 2 10888.8 1249.74 4
 -2 44 2 10549.2 1308.97 4
 2 44 -2 12730.7 1405.76 4
 -2 44 -2 10912.9 1304.6 4
 -2 44 3 7272.94 1059.68 4
 2 44 3 7497.25 1064.39 4
 -2 44 -3 6185.3 1053.63 4
 2 44 4 41535.7 2377.47 4
 -2 44 4 38344.6 2241 4
 -2 44 5 26266.5 1874.97 4
 2 44 5 25358.4 1851.74 4
 2 44 6 19325.4 1642.46 4
 -2 44 6 18867.7 1559.37 4
 -2 44 7 21913.5 1608.9 4
 2 44 7 24703 1764.17 4
 -2 44 8 2371.65 598.775 4
 2 44 8 2985.54 743.08 4
 2 44 9 2064.23 545.453 4
 -2 44 9 2435.47 598.074 4
 -2 46 0 5973.59 893.523 4
 2 46 0 6992.37 1047.34 4
 -2 46 1 -108.57 440.082 4
 -2 46 -1 -388.805 502.579 4
 2 46 -1 -233.782 433.056 4
 2 46 1 222.654 610.381 4
 -2 46 2 1448.89 534.575 4
 -2 46 -2 1295.15 536.471 4
 2 46 2 47.178 421.885 4
 2 46 3 2343.82 640.082 4
 -2 46 3 2677.88 643.87 4
 2 46 4 9916.46 1129.25 4
 -2 46 4 11086.1 1208.25 4
 2 46 5 12780.7 1301.42 4
 -2 46 5 14109.6 1317.77 4
 2 46 6 12370.1 1199.35 4
 -2 46 6 12135.6 1210 4
 -2 46 7 18903.9 1416.35 4
 2 46 7 19427 1447.78 4
 -2 46 8 1557.61 525.381 4
 2 48 0 21543 1573.79 4
 -2 48 0 20582.3 1570.12 4
 -2 48 1 758.663 454.379 4
 2 48 1 1148.24 488.559 4
 -2 48 2 4298.42 725.282 4
 2 48 2 3301.68 692.876 4
 -2 48 3 200.251 341.774 4
 2 48 3 789.951 475.206 4
 2 48 4 480.165 400.513 4
 -2 48 4 1571.01 469.162 4
 -2 48 5 4542.17 717.273 4
 3 1 1 89795.1 1320.85 1
 3 -1 1 91089.3 1290.74 1
 3 -1 2 28691.8 827.333 1
 3 1 2 28968.6 876.94 1
 -3 1 -2 28895.3 745.778 1
 3 1 3 109059 1957.3 1
 3 -1 3 111221 1901.89 1
 -3 1 -3 112757 1659.65 1
 3 1 4 16093.1 881.879 1
 3 -1 4 18120 905.505 1
 -3 1 -4 17370.3 753.082 1
 -3 1 -5 64653.9 1629.89 1
 3 1 5 61526.1 2002.77 1
 -3 -1 -5 62462.4 1694.6 1
 3 -1 5 63260.5 1963.49 1
 -3 -1 -6 5851.94 612.095 1
 -3 1 -6 5474.06 587.696 1
 3 -1 6 5888.8 741.073 1
 3 1 6 5854.52 786.664 1
 3 -1 -7 893.341 461.682 1
 3 1 -7 476.781 465.04 1
 3 -1 7 921.107 553.833 1
 -3 1 -7 943.039 311.517 1
 -3 -1 -7 526.408 259.381 1
 3 1 7 275.09 441.499 1
 3 1 -8 29207.1 1867.93 1
 3 -1 -8 29124.6 1930.72 1
 3 1 8 26178.6 1968.15 1
 -3 1 -8 27737.8 1416.19 1
 3 -1 8 28738.2 1997 1
 -3 -1 -8 27113.1 1465.73 1
 3 1 -9 5322.59 1018.06 1
 -3 1 -9 6691.93 816.353 1
 -3 -1 -9 6709.09 780.224 3
 -3 1 -9 6467.85 777.591 3
 -3 -1 -10 32900.2 1680.67 3
 -3 1 -10 30844.9 1613.95 3
 -3 1 -11 1274.45 580.476 3
 -3 -1 -11 1258.64 537.57 3
 -3 -1 -12 38485.2 2093.73 3
 -3 1 -12 40220.1 2120.2 3
 -3 -1 -13 5726.05 927.418 3
 3 1 -13 4617.94 907.979 3
 -3 1 -13 5651.67 942.372 3
 3 -1 -13 4923.04 936.649 3
 3 -1 -14 13980 1477.22 3
 -3 -1 -14 14199.7 1465.26 3
 3 1 -14 13360.6 1391.99 3
 -3 1 -14 13569.6 1405.78 3
 -3 1 -15 8613.95 1206.83 3
 3 -1 -15 7737.84 1197.74 3
 -3 -1 -15 9140.8 1184.37 3
 3 1 -15 8790.78 1226.3 3
 3 -1 -16 13784.2 1511.93 3
 3 1 -16 14199.2 1498.18 3
 -3 -1 -16 15360.1 1485.77 3
 -3 -1 -17 13625.3 1336.39 5
 3 -1 -17 13318.3 1418.23 3
 3 1 -17 13611.2 1470.91 3
 -3 1 -17 13597.1 1266.35 5
 -3 -1 -18 2115.36 569.88 5
 3 -1 -18 706.437 524.347 3
 -3 1 -18 2120.36 568.29 5
 3 1 -18 1422.97 581.074 3
 3 -1 -19 14668.3 1312.75 3
 -3 1 -19 14211.3 1131.78 5
 3 1 -19 13426.5 1269.52 3
 -3 -1 -19 14776.9 1191.37 5
 -3 -1 -20 556.49 382.133 5
 -3 1 -20 12.1379 297.472 5
 3 -1 -20 1393.98 485.251 3
 3 1 -20 411.755 384.374 3
 3 3 0 1689.26 204.897 1
 -3 -3 -1 6924.6 377.434 1
 3 3 1 6805.66 409.783 1
 3 -3 1 7137.53 380.878 1
 3 3 2 22271.4 815.841 1
 -3 3 -2 22697.4 647.444 1
 3 3 3 146091 2396.75 1
 -3 3 -3 148720 1801.89 1
 -3 3 -4 23533.8 842.674 1
 3 3 4 22726.5 1160.09 1
 3 -3 4 26076.2 1108.95 1
 -3 -3 -5 3456.54 475.869 1
 3 3 5 3882.4 619.817 1
 -3 3 -5 3599.78 415.764 1
 3 -3 5 3924.85 566.047 1
 3 -3 6 18761.6 1287.1 1
 3 3 6 17920.2 1314.49 1
 -3 3 -6 16105.2 875.553 1
 -3 -3 -6 16913.9 1038.99 1
 -3 -3 -7 6303.73 690.224 1
 3 3 -7 6024.3 824.032 1
 3 -3 -7 6743.33 953.852 1
 3 3 7 6309.45 947.902 1
 3 -3 7 6981.94 928.627 1
 -3 3 -7 5668.41 601.895 1
 3 3 8 2850.4 737.843 1
 -3 -3 -8 2882.99 523.892 1
 3 -3 -8 3404.72 802.223 1
 -3 3 -8 3441.93 530.356 1
 3 3 -8 3322.71 713.873 1
 -3 -3 -9 1699.18 465.933 3
 -3 3 -9 1709.15 464.825 1
 3 3 -9 2041.95 691.4 1
 -3 3 -9 1663.93 471.594 3
 -3 -3 -10 21962.2 1403.67 3
 -3 3 -10 22097.7 1405.11 3
 -3 3 -11 522.528 505.606 3
 -3 -3 -11 546.915 404.054 3
 3 3 -12 13901.3 1327.16 3
 -3 -3 -12 13704.2 1256.15 3
 -3 3 -12 14192.6 1292.68 3
 3 3 -13 18.9712 500.676 3
 -3 3 -13 486.547 556.963 3
 3 -3 -13 -188.363 506.067 3
 -3 -3 -13 1183.91 664.111 3
 3 -3 -14 5983.67 1093.45 3
 3 3 -14 5926.6 1120.64 3
 -3 -3 -14 4305.81 852.887 3
 -3 3 -14 6468.11 1013.85 3
 3 3 -15 5586.74 1054.67 3
 -3 -3 -15 4976.48 1002.93 3
 3 -3 -15 5177 1010.34 3
 -3 3 -15 5153.98 1039.71 3
 -3 -3 -16 2961.98 824.049 3
 -3 3 -16 1106.27 521.032 5
 3 -3 -16 1260.88 709.187 3
 3 3 -16 3793.65 924.962 3
 3 -3 -17 4305.89 885.223 3
 -3 3 -17 5290.45 865.86 5
 3 3 -17 4320.68 869.289 3
 -3 -3 -17 5741.64 974.435 5
 -3 -3 -18 1395.11 572.475 5
 3 -3 -18 2444.44 600.573 3
 -3 3 -18 1774.71 508.506 5
 3 3 -18 2572.44 726.27 3
 -3 -3 -19 3446.71 611.189 5
 -3 3 -19 2456.98 520.183 5
 3 3 -19 3741.71 712.438 3
 3 -3 -19 3117.78 748.725 3
 -3 -3 -20 929.251 382.401 5
 3 3 -20 1973.49 486.463 5
 3 -3 -20 960.127 443.439 3
 3 5 0 18668.6 618.332 1
 3 5 1 36199.1 948.086 1
 -3 -5 -1 38212.5 910.257 1
 3 5 2 5826.96 510.945 1
 3 -5 2 5390.81 374.25 1
 -3 5 -3 225950 2117.36 1
 3 5 3 223706 3160.13 1
 -3 5 -4 78021.5 1397.28 1
 3 5 4 77702.3 2127.52 1
 3 -5 5 5524.78 586.145 1
 -3 5 -5 5168.93 434.419 1
 -3 -5 -5 5750.32 584.413 1
 3 5 5 4892.28 700.114 1
 3 -5 -6 2508.01 681.115 1
 3 -5 6 2627.85 592.462 1
 3 5 6 1830.89 539.609 1
 -3 -5 -6 2681.21 479.501 1
 -3 5 -6 1888.61 334.811 1
 3 5 -7 3300.9 702.245 1
 3 -5 -7 2914.34 667.458 1
 -3 5 -7 2997.26 447.401 1
 -3 -5 -7 2982.86 571.371 1
 3 -5 7 3814.76 743.823 1
 3 5 7 3458.17 718.962 1
 3 5 -8 2968.2 714.234 1
 -3 5 -8 2630.21 465.542 1
 -3 -5 -8 2321.73 503.871 1
 3 -5 -8 3292.09 843.688 1
 -3 -5 -9 731.722 431.85 3
 -3 5 -9 1058.25 338.279 1
 -3 5 -9 1101.33 368.662 3
 3 5 -9 640.056 392.215 1
 -3 5 -10 4551.55 654.003 6
 -3 -5 -10 4616.08 712.555 3
 -3 5 -10 5148.68 755.37 3
 -3 5 -11 1501.11 356.307 6
 -3 5 -11 2446.14 655.995 3
 -3 -5 -11 2063.87 633.575 3
 -3 -5 -12 18756.1 1485.98 3
 3 5 -12 18522.5 1428.15 6
 -3 5 -12 18765.1 1443.33 3
 3 5 -12 17768.6 1482.97 3
 -3 -5 -13 1701.19 579.526 3
 3 -5 -13 488.692 595.249 3
 3 5 -13 1759.62 659.512 3
 3 5 -13 1520.25 573.984 6
 -3 5 -13 1099.09 642.138 3
 3 -5 -14 7016.5 1162.31 3
 -3 5 -14 5433.49 1003.87 3
 -3 -5 -14 4245.75 809.904 3
 3 5 -14 4956.74 939.123 3
 -3 5 -15 3225.22 805.768 3
 3 5 -15 4361.88 961.513 3
 -3 -5 -15 3654.97 854.898 3
 3 -5 -15 4961.55 1025.29 3
 -3 -5 -16 244.434 480.657 3
 3 5 -16 941.464 592.12 3
 -3 5 -16 -78.7907 455.373 5
 -3 5 -17 723.464 395.259 5
 -3 -5 -17 963.744 598.737 5
 3 -5 -17 564.157 551.444 3
 3 5 -17 1503.78 584.438 3
 -3 -5 -18 1144.24 641.982 5
 -3 5 -18 163.405 342.443 5
 3 -5 -18 576.228 536.633 3
 3 5 -18 151.3 455.006 3
 -3 -5 -19 2761.7 660.536 5
 3 5 -19 2061.56 588.834 3
 3 -5 -19 1909.05 591.217 3
 -3 -5 -20 -326.032 400.776 5
 3 -5 -20 44.4546 340.681 3
 -3 -7 0 15105.7 586.161 1
 3 7 0 14348.3 596.437 1
 3 7 1 233505 2570.74 1
 -3 -7 -1 238747 2345.59 1
 3 7 -1 235134 2087.28 1
 -3 -7 -2 19952 898.768 1
 3 7 2 19337.6 1011.29 1
 3 7 3 130400 2561.8 1
 -3 -7 -3 130690 2227.59 1
 -3 -7 -4 137102 2523.53 1
 -3 7 -4 133273 1756.8 1
 -3 7 -5 5646.24 425.775 1
 3 7 5 5543.44 771.864 1
 3 -7 5 5947.94 624.779 1
 -3 -7 -5 5266.22 585.365 1
 -3 7 -6 13554.9 721.595 1
 3 -7 -6 13632.1 1288.56 1
 -3 -7 -6 13134.1 968.348 1
 3 -7 6 14719.6 1084.49 1
 3 7 6 13371.7 1255.62 1
 -3 7 -7 8284.53 632.868 1
 -3 -7 -7 8662.19 872.923 1
 3 7 7 8482.92 1139.26 1
 3 -7 -7 8811.85 1097.2 1
 3 -7 7 9289.05 1040.11 1
 3 7 -7 8233.79 887.476 1
 -3 7 -8 18508.7 998.353 1
 3 7 -8 18159.4 1367.63 1
 -3 7 -9 2737.87 453.907 1
 3 7 -9 2020.34 480.077 1
 -3 7 -9 3289.88 600.07 3
 -3 7 -9 2605.41 473.126 6
 -3 -7 -9 3278.71 574.4 3
 -3 7 -10 66980.8 2365.37 3
 -3 7 -10 58836.4 2202.14 6
 -3 -7 -10 62865.3 2294.7 3
 -3 -7 -11 558.065 423.279 3
 -3 7 -11 1455.56 523.251 3
 3 7 -11 921.901 557.99 3
 -3 7 -11 810.422 411.103 6
 -3 -7 -12 18470.1 1481.01 3
 3 7 -12 18564 1519.24 3
 -3 7 -12 18083.5 1356.52 6
 3 7 -12 17396.5 1463.13 6
 -3 7 -12 17154.9 1406.49 3
 -3 7 -13 7127.14 864.385 6
 3 7 -13 6847.6 1020.44 3
 -3 -7 -13 7267.31 983.784 3
 -3 7 -13 8131.49 1031 3
 3 7 -13 5656.82 896.965 6
 3 -7 -14 17919.8 1549.65 3
 3 7 -14 23546.7 1780.78 3
 -3 -7 -14 18812.7 1591.28 3
 -3 7 -14 24246.7 1730.86 3
 3 7 -14 21482.2 1620.12 6
 3 -7 -15 3353.51 824.167 3
 3 7 -15 4019.85 896.784 3
 -3 -7 -15 3980.36 869.19 3
 -3 7 -15 4860.32 796.28 5
 3 7 -16 729.721 589.314 3
 3 -7 -16 -611.554 620.702 3
 -3 -7 -16 1369.51 762.209 5
 -3 -7 -16 1109.86 619.736 3
 -3 7 -16 996.024 514.58 5
 3 7 -17 3807.14 813.799 3
 3 -7 -17 4593.97 949.743 3
 -3 -7 -17 4707.01 992.587 5
 3 -7 -18 7726.97 1066.03 3
 -3 -7 -18 9060.95 1125.62 5
 3 7 -18 7168.51 995.301 3
 3 7 -19 5204.29 791.847 3
 3 -7 -19 5394.16 833.689 3
 -3 -7 -19 7312.71 954.024 5
 3 -7 -20 668.794 358.572 3
 -3 -7 -20 157.516 331.192 5
 -3 -9 0 447.121 212.939 1
 3 9 0 1178.81 234.946 1
 3 9 1 18980.4 800.349 1
 3 9 -1 20106.6 642.209 1
 -3 -9 -1 19401.7 696.219 1
 -3 -9 -2 29977.5 1031.92 1
 3 9 2 29880.6 1195.49 1
 3 9 -2 33102.2 811.54 1
 -3 -9 -3 67752.2 1682.47 1
 3 9 3 65674.2 1971.69 1
 3 9 4 15708.1 1101.7 1
 -3 -9 -4 17472.6 982.315 1
 3 -9 4 13813.3 720.964 1
 -3 9 -5 13035.7 594.467 1
 3 -9 5 14409.5 894.928 1
 3 9 5 13255.7 1150.17 1
 3 -9 -5 14008.2 1286.06 1
 -3 -9 -5 12545.3 910.285 1
 3 -9 -6 6937.36 948.306 1
 -3 9 -6 5901.42 450.444 1
 3 9 -6 5800.29 700.858 1
 -3 -9 -6 6114.41 702.886 1
 3 9 6 6168.21 946.885 1
 3 -9 6 6300.01 714.829 1
 -3 9 -7 35271.4 1184.17 1
 3 9 -7 34672.1 1649.12 1
 -3 -9 -7 38237 1761.71 1
 3 -9 -7 38861.6 2264.98 1
 3 9 7 33335.6 2125.74 1
 -3 9 -8 27537.8 1151.15 1
 3 9 -8 26829.8 1535.27 1
 -3 9 -8 28613.2 1362.81 3
 -3 9 -9 8147.27 852.185 6
 -3 -9 -9 8101.99 839.543 3
 -3 9 -9 8204.95 824.49 3
 -3 9 -10 103899 3068.06 6
 -3 9 -10 106150 2991.91 3
 -3 -9 -10 99338.8 2883.86 3
 3 9 -10 104128 3126.15 3
 3 9 -11 1418.29 603.137 3
 -3 9 -11 1548.66 563.138 3
 -3 -9 -11 1743.43 559.858 3
 -3 9 -11 1239.01 430.218 6
 3 9 -12 83538.3 3052.98 3
 3 9 -12 75155.4 3064.77 6
 -3 9 -12 85670.6 2967.82 3
 -3 -9 -12 80240.8 2880.69 3
 -3 9 -12 79172.3 2902.23 6
 3 -9 -13 6173.38 969.926 3
 3 9 -13 7898.38 1049.42 3
 3 9 -13 7809.3 1038.18 6
 -3 -9 -13 8264.3 1127.36 3
 -3 9 -13 9153.46 1087.61 3
 -3 9 -13 7541.5 1031.73 6
 3 9 -14 21256.8 1691.7 6
 3 -9 -14 17552.7 1529.02 3
 -3 -9 -14 15987.3 1408.62 3
 3 9 -14 22513.1 1811.02 3
 -3 9 -14 23202.8 1652.84 6
 3 9 -15 4746.06 833.95 6
 3 -9 -15 5574.79 1039.35 3
 3 9 -15 4606.36 1002.65 3
 -3 -9 -15 4234.16 842.708 3
 3 9 -16 8297.72 1122.15 3
 3 -9 -16 8441.87 1232.46 3
 -3 -9 -16 8062.44 1182.18 5
 3 9 -17 23237.8 1696.18 3
 3 -9 -17 21712.2 1814.38 3
 -3 -9 -17 26798.7 1930.54 5
 -3 -9 -18 1160.17 574.07 5
 3 9 -18 -264.561 418.827 3
 3 -9 -18 477.727 496.485 3
 3 -9 -19 17223.5 1360.71 3
 -3 -9 -19 18822.5 1414.99 5
 -3 -9 -20 209.351 326.847 5
 3 -9 -20 700.981 429.203 5
 -3 -11 0 446.468 206.54 1
 3 11 0 261.33 227.227 1
 3 11 1 48838.2 1419.59 1
 3 11 -1 49062.7 1075.42 1
 -3 -11 -1 49071.6 1204.53 1
 3 11 -2 7821.12 406.884 1
 -3 -11 -2 6596.5 517.487 1
 3 -11 2 7764.83 376.551 1
 3 -11 3 2399 278.303 1
 3 11 -3 3402.91 288.573 1
 -3 -11 -3 2096.6 399.423 1
 3 11 3 2040.61 477.197 1
 -3 -11 -4 12408.1 882.394 1
 3 -11 4 13382.1 647.025 1
 3 11 4 12821.8 1051.83 1
 3 -11 -4 14258.5 1199.03 1
 3 -11 5 7143.73 586.08 1
 3 -11 -5 8349.14 1008.67 1
 3 11 5 7030.92 933.014 1
 -3 -11 -5 7144.1 738.818 1
 3 -11 -6 34984 2019.04 1
 3 11 6 32273.3 1997.34 1
 3 11 -6 33236.5 1426.51 1
 -3 -11 -6 33524.9 1587.66 1
 -3 11 -6 35240 1000.41 1
 -3 -11 -7 6472.32 807.625 1
 3 11 -7 6467.46 704.792 1
 3 -11 -7 6924.34 1081.21 1
 -3 11 -7 6944.26 509.275 1
 -3 11 -8 14769.6 1115.35 6
 -3 11 -8 14540.3 976.087 3
 -3 11 -9 9455.92 966.902 6
 3 11 -9 11243.2 995.386 3
 -3 -11 -9 9470.48 898.051 3
 -3 11 -9 11697 967.474 3
 3 11 -10 14595.3 1203.07 3
 -3 11 -10 13936 1122.26 3
 -3 -11 -10 12289.2 1059.91 3
 -3 11 -10 13095.2 1172.96 6
 3 11 -11 1937.42 645.15 3
 -3 -11 -11 1627.41 536.677 3
 -3 11 -11 2081.53 613.171 6
 -3 11 -11 2174.99 596.704 3
 3 11 -12 37721.5 2207.34 6
 -3 11 -12 40209.5 2140.7 6
 -3 11 -12 42439.7 2074.99 3
 -3 -11 -12 36060.3 1901.46 3
 3 11 -12 39323.1 2131.73 3
 3 11 -13 -511.042 666.171 6
 3 11 -13 518.695 504.28 3
 -3 11 -13 504.033 500.276 6
 3 -11 -13 586.277 544.312 3
 -3 -11 -13 -1485.66 703.466 3
 -3 -11 -14 6185.17 920.75 3
 -3 11 -14 5356.26 894.213 6
 3 -11 -14 6930.93 1100.71 3
 3 11 -14 5391.58 904.901 6
 3 11 -14 5134.5 860.679 3
 -3 11 -15 2468.78 581.547 6
 3 11 -15 2720.89 707.17 6
 -3 -11 -15 2875.92 699.596 3
 3 -11 -15 2611.97 731.995 3
 3 11 -15 2854.62 703.141 3
 3 -11 -16 10227 1242.07 3
 3 11 -16 9569.37 1081.21 6
 3 11 -16 8659.67 1073.27 3
 -3 -11 -16 9706.8 1190.87 5
 3 -11 -17 2636.31 752.943 3
 3 11 -17 1635.97 531.705 3
 -3 -11 -17 3122.65 790.333 5
 3 11 -18 4232.72 712.189 3
 -3 -11 -18 5052.01 943.588 5
 3 -11 -18 3586.37 727.119 3
 -3 -11 -19 5082.16 798.722 5
 3 -11 -19 3967.57 644.438 3
 -3 -11 -20 20.9734 308.894 5
 3 -11 -20 660.599 461.58 5
 -3 -13 0 1248.56 254.469 1
 3 13 0 1188.57 318.066 1
 3 13 -1 989.123 262.279 1
 -3 -13 -1 980.707 254.275 1
 3 13 1 602.177 289.629 1
 3 -13 2 3003.79 229.116 1
 3 13 -2 1890.32 216.991 1
 3 13 2 2481.86 445.149 1
 -3 -13 -2 2872.33 390.191 1
 -3 -13 -3 1447.04 345.921 1
 3 13 3 1560.4 446.235 1
 3 -13 -3 1463.63 457.368 1
 3 -13 3 1543.98 190.77 1
 3 13 -3 1331.97 185.863 1
 3 13 4 814.807 510.105 1
 3 -13 4 826.653 189.069 1
 -3 -13 -4 1337.37 399.154 1
 3 13 -4 916.112 179.642 1
 3 -13 -4 566.532 418.893 1
 -3 -13 -5 396.624 321.323 1
 3 13 5 437.322 463.217 1
 3 -13 -5 519.461 548.765 1
 3 -13 -6 79406.3 3114.69 1
 -3 -13 -6 78739.5 2520.53 1
 3 13 6 72142.9 3099.14 1
 3 13 -6 77779.1 1932.8 1
 -3 13 -7 5395.03 719.968 6
 -3 13 -8 7668.53 870.041 6
 -3 13 -9 7832.39 929.263 6
 -3 -13 -9 7904.86 775.933 3
 3 13 -9 8674.21 890.063 3
 3 13 -10 8793.59 931.016 3
 -3 -13 -10 7426.94 825.398 3
 -3 13 -10 6898.6 896.814 6
 -3 -13 -11 561.691 363.458 3
 3 13 -11 826.799 516.515 3
 3 13 -11 863.364 578.462 6
 -3 13 -11 1325.51 498.582 6
 3 13 -12 1102.01 509.992 3
 3 13 -12 26.4748 467.636 6
 -3 -13 -12 233.615 443.648 3
 -3 13 -12 356.16 468.303 6
 3 13 -13 2523.34 671.057 3
 -3 -13 -13 3023 687.057 3
 3 -13 -13 2619.36 687.809 3
 3 13 -13 1666.63 542.691 6
 -3 13 -14 569.972 441.461 6
 3 -13 -14 766.099 602.754 3
 3 13 -14 1395.93 587.877 3
 -3 -13 -14 578.343 407.883 3
 3 13 -14 483.696 602.137 6
 3 -13 -15 1596 628.254 3
 -3 13 -15 2135.64 718.367 6
 3 13 -15 779.849 435.242 3
 -3 -13 -15 1223 583.342 3
 3 13 -15 984.72 535.688 6
 -3 -13 -15 1163.88 642.892 5
 -3 -13 -16 1154.01 760.706 5
 3 -13 -16 779.015 506.914 3
 3 13 -16 781.546 368.673 6
 3 13 -16 1316.26 546.457 3
 -3 -13 -17 1116.61 598.491 5
 3 13 -17 925.78 433.398 3
 3 -13 -17 1312.63 592.553 3
 -3 -13 -18 81.1993 443.042 5
 3 -13 -18 994.796 531.165 3
 -3 -13 -19 774.14 476.348 5
 3 -13 -19 981.372 461.657 3
 3 -13 -20 -410.769 326.593 5
 -3 -13 -20 106.664 302.171 5
 3 15 0 465.028 219.447 1
 -3 -15 -1 10760.4 639.778 1
 3 15 -1 8050.35 519.3 1
 3 15 1 9895.69 794.959 1
 3 -15 -1 10793.5 863.86 1
 3 15 -2 1632.79 216.769 1
 -3 -15 -2 2386.72 375.346 1
 3 -15 2 1917.17 158.365 1
 3 15 2 2444.22 504.521 1
 3 -15 -2 2077.07 520.53 1
 3 -15 -3 27553.4 1514.14 1
 -3 -15 -3 27709.9 1232.08 1
 3 -15 -4 12728.4 1193.16 1
 -3 -15 -4 13335 936.382 1
 3 15 4 11782.4 1141.08 1
 3 15 -4 9232.9 374.237 1
 3 15 -5 104184 1284.19 1
 3 -15 -5 111653 3528.09 1
 3 15 5 105456 3665.43 1
 -3 -15 -5 106918 2758.7 1
 3 -15 -6 14659 1380.65 1
 -3 15 -6 15211.5 1111.16 6
 -3 -15 -6 14782.7 1153.08 1
 -3 15 -7 1984.59 505.142 6
 -3 15 -8 17991.5 1340.71 6
 3 15 -9 4792.14 665.831 3
 -3 15 -9 4540.39 742.785 6
 -3 -15 -10 4606.68 647.495 3
 3 15 -10 5510.54 800.11 3
 -3 15 -10 4727.71 821.455 6
 3 15 -11 49.6327 328.308 3
 -3 15 -11 315.127 473.575 6
 -3 -15 -11 -255.993 307.972 3
 3 15 -11 141.41 515.359 6
 -3 15 -12 16215.9 1454.42 6
 3 15 -12 12919.4 1195.74 3
 3 15 -12 15866.6 1532.69 6
 -3 -15 -12 15053.8 1265.25 3
 3 -15 -13 5854.08 924.869 3
 3 15 -13 4550.63 784.56 3
 -3 -15 -13 5446.19 817.962 3
 -3 15 -13 6648.23 1093.06 6
 3 15 -13 2946.22 660.96 6
 3 15 -14 4343.76 929.511 6
 -3 15 -14 3374.03 756.395 6
 -3 -15 -14 3395.06 700.932 3
 3 15 -14 3498.84 694.869 3
 3 -15 -14 4734.95 848.438 3
 -3 -15 -14 5496.4 1100.55 5
 -3 15 -15 3902.81 881.517 6
 3 -15 -15 4345.73 881.499 3
 3 15 -15 5522.34 926.905 3
 3 15 -15 4195.59 842.359 6
 -3 -15 -15 3360.98 837.39 5
 3 15 -16 5610.43 882.304 6
 -3 -15 -16 6172.75 1052.84 5
 3 15 -16 6280.35 869.252 3
 3 -15 -16 5864.88 936.519 3
 3 -15 -17 4893.8 793.127 3
 3 15 -17 5717.43 867.609 6
 -3 -15 -17 6872.35 994.34 5
 3 -15 -18 1138.3 451.506 3
 -3 -15 -18 1278.74 539.615 5
 3 -15 -19 3483.74 575.731 3
 -3 -15 -19 5734.45 759.138 5
 3 -15 -19 5460.9 817.878 5
 -3 -15 -20 355.594 364.27 5
 3 -15 -20 492.947 345.746 5
 3 17 0 -60.7881 225.092 1
 3 -17 0 26.4325 271.331 1
 3 -17 -1 17177.8 1035.3 1
 -3 -17 -1 16705.5 789.62 1
 3 -17 1 16291.9 541.015 1
 3 17 -1 13300.4 704.404 1
 3 17 1 13686.8 958.134 1
 3 -17 1 16192.7 650.694 1
 3 17 2 758.502 336.437 1
 3 -17 -2 422.643 395.708 1
 3 17 -2 48.1384 145.476 1
 -3 -17 -2 680.728 278.207 1
 3 17 3 8508.63 945.354 1
 -3 -17 -3 9268.12 759.111 1
 3 -17 -3 8642.62 913.611 1
 3 -17 -4 114172 3343.9 1
 -3 -17 -4 115740 2779.82 1
 3 17 4 111563 3675.32 1
 3 -17 -5 112062 3539.24 1
 -3 17 -5 114817 3188.01 4
 -3 17 -5 113685 2937.68 6
 -3 -17 -5 111536 2887.73 1
 -3 17 -6 37092 1799.06 6
 -3 17 -7 32740 1728.87 6
 -3 17 -8 59412.4 2478.25 6
 -3 17 -9 2118.32 643.761 6
 3 17 -10 12865.7 1367.88 6
 -3 17 -10 12637.2 1284.29 6
 -3 17 -11 908.477 463.889 6
 3 17 -11 626.776 352.666 3
 3 17 -11 1602.57 752.202 6
 3 17 -12 14847.2 1504.66 6
 3 17 -12 14708.9 1235.96 3
 -3 17 -12 15732.6 1564.61 6
 -3 -17 -13 1454.73 695.186 5
 3 -17 -13 1380.43 615.808 3
 3 17 -13 366.687 399.743 3
 3 17 -13 1903.39 769.74 6
 -3 17 -13 1567.91 781.432 6
 3 17 -14 14890.3 1489.44 6
 -3 -17 -14 15498.8 1493.87 5
 3 17 -14 11122.5 1099.24 3
 3 -17 -14 12931.4 1320.32 3
 -3 17 -14 14402.7 1441.42 6
 3 17 -15 10548.8 1096.51 3
 3 17 -15 8362.83 1076.01 6
 -3 -17 -15 8218.81 1078.62 5
 -3 17 -15 8946.99 1154.86 6
 3 -17 -15 8158.6 1085.77 3
 3 17 -16 11870.5 1301.75 6
 -3 -17 -16 10740.4 1249.9 5
 3 -17 -16 9269.06 1097.67 3
 3 17 -17 21097.7 1521.15 6
 3 -17 -17 20220 1434.55 3
 -3 -17 -17 23216.8 1620.68 5
 -3 -17 -18 2142.8 553.185 5
 3 -17 -18 2585.42 549.297 3
 -3 -17 -19 11621.5 974.172 5
 3 -17 -19 11917.3 1048.98 5
 3 -19 0 4368.43 441.766 1
 3 19 0 3486.47 488.37 1
 3 -19 1 169.014 91.7981 1
 3 -19 -1 51.1541 262.208 1
 -3 -19 -1 539.167 248.787 1
 3 -19 1 335.215 88.1154 1
 3 19 1 132.313 342.104 1
 3 19 2 2677.02 614.512 1
 3 -19 -2 1541.72 444.674 1
 -3 -19 -2 2333.92 409.581 1
 -3 19 -3 122954 3106.65 4
 -3 -19 -3 124425 2667.22 1
 3 -19 -3 123757 3248.51 1
 -3 19 -4 47651.8 2060.77 4
 -3 -19 -4 43319.4 1734.83 1
 -3 19 -4 42786.8 1842.77 6
 3 -19 -4 41573.4 2058.92 1
 -3 -19 -5 64779.4 2264.93 1
 -3 19 -5 67682.9 2440.82 6
 3 -19 -5 64093.8 2709.36 1
 -3 19 -5 68863.4 2617.98 4
 -3 19 -6 69282.2 2771.94 4
 -3 -19 -6 63804.1 2053.97 5
 3 19 -6 63637 3272.73 7
 -3 19 -6 68393.2 2495.21 6
 -3 -19 -7 9983.26 935.935 5
 -3 19 -7 9631.71 1099.55 6
 -3 19 -8 53669.4 2404.36 6
 -3 -19 -8 49410 2035.06 5
 -3 19 -9 2827.19 667.423 6
 3 19 -9 2237.82 628.773 6
 3 19 -10 7905.28 1132.46 6
 -3 -19 -10 6995.47 942.44 5
 -3 19 -10 8684.98 1102.51 6
 3 19 -11 1015.7 537.942 6
 -3 -19 -11 677.49 481.07 5
 -3 19 -12 12445.9 1404.69 6
 3 -19 -12 13785.8 1306.77 3
 3 19 -12 10110.9 1215.45 6
 -3 -19 -12 9770.34 1147.72 5
 -3 -19 -13 2377.84 785.284 5
 3 -19 -13 1978.23 594.059 3
 -3 19 -13 2661.28 759.307 6
 3 19 -13 1871.07 608.317 6
 -3 -19 -14 5893.09 974.892 5
 -3 19 -14 6508.97 1063.08 6
 3 -19 -14 5189.45 826.107 3
 3 19 -14 5416.18 933.674 6
 -3 19 -15 5342.13 941.883 6
 3 19 -15 3952.1 824.171 6
 -3 -19 -15 3988.15 811.128 5
 3 -19 -15 3810.67 757.506 3
 3 -19 -16 9392.23 1007.94 3
 3 19 -16 7529.04 989.531 6
 -3 -19 -16 9029.47 1087.6 5
 3 19 -17 9019.14 1043.48 6
 -3 -19 -17 9410.88 1033.03 5
 3 19 -18 3556.62 654.666 6
 3 -19 -18 4321.06 788.462 5
 -3 -19 -18 3513.68 689.665 5
 -3 -19 -19 13791.9 1048.91 5
 3 -19 -19 13734.2 1054.6 5
 -3 21 0 209.117 324.183 4
 -3 21 1 21189.6 1370.2 4
 -3 21 -1 21196.4 1328.67 4
 3 -21 -2 2155.48 376.099 1
 -3 21 -2 2357.77 527.674 4
 -3 -21 -2 3019.34 409.911 1
 -3 -21 -3 32832.9 1379.15 1
 3 -21 -3 34020.6 1724.64 1
 -3 21 -3 32996.5 1721.18 4
 -3 21 -3 35508.2 1647.5 6
 -3 21 -4 1488.63 434.713 4
 -3 -21 -4 1979.9 413.504 1
 -3 21 -4 1649.97 484.119 6
 3 -21 -4 2602.61 689.791 1
 -3 21 -5 1218.72 608.318 4
 -3 21 -5 634.532 342.425 6
 3 21 -5 500.563 612.37 7
 3 21 -5 468.153 412.078 4
 -3 21 -6 7087.59 941.31 6
 3 21 -6 6565.42 862.055 4
 3 21 -6 4813.65 1097.68 7
 -3 21 -6 6396.82 1003 4
 -3 -21 -6 5900.33 656.048 5
 -3 -21 -7 6090.54 727.613 5
 -3 21 -7 7237.95 945.403 6
 -3 21 -8 2207.18 700.183 6
 3 21 -8 1765.42 654.307 6
 -3 -21 -8 1965.8 539.868 5
 -3 -21 -9 541.649 424.279 5
 3 21 -9 1216.25 583.542 6
 -3 21 -9 852.252 539.766 6
 -3 -21 -10 2108.65 647.395 5
 3 21 -10 3402.02 824.293 6
 -3 21 -10 3070.35 780.629 6
 -3 -21 -11 1741.74 625.005 5
 -3 21 -11 1526.68 696.475 6
 3 21 -11 1332.46 637.763 6
 -3 -21 -12 1135.53 721.902 5
 -3 21 -12 834.754 547.307 6
 3 21 -12 930.732 632.207 6
 -3 21 -13 1496.05 638.59 6
 3 21 -13 633.768 541.869 6
 -3 21 -14 746.548 586.984 6
 3 21 -14 268.4 430.496 6
 -3 -21 -14 931.897 608.453 5
 -3 21 -15 2939.32 760.507 6
 3 21 -15 2548.8 690.723 6
 -3 -21 -15 2904.84 693.865 5
 3 21 -16 1225.82 532.679 6
 -3 -21 -16 1132.54 574.582 5
 -3 -21 -17 1405.04 590.617 5
 3 21 -17 1400.08 460.915 6
 3 21 -18 920.298 430.823 6
 3 -21 -18 1117.53 482.308 5
 -3 -21 -18 546.83 361.003 5
 -3 -21 -19 1995.68 477.605 5
 -3 23 0 459.435 346.945 4
 3 23 0 508.001 482.527 4
 -3 23 -1 16295.5 1230.47 4
 3 23 -1 16580.7 1282.15 4
 -3 23 1 16169 1264.28 4
 -3 23 -2 3044.66 558.771 6
 -3 23 -2 2462.06 610.992 4
 3 23 -2 2063.21 546.398 4
 3 23 -2 2497.48 540.104 6
 3 23 -3 6674.17 849.291 4
 -3 23 -3 6789.84 854.338 4
 3 23 -3 6171.31 1075.34 7
 3 23 -3 6087.34 809.483 6
 -3 23 -3 6338.52 783.034 6
 -3 23 -4 1582.55 506.038 4
 3 23 -4 1200.25 701.41 7
 -3 23 -4 1236.39 396.16 6
 3 23 -4 2057.64 554.074 6
 3 23 -4 1865.98 553.287 4
 3 23 -5 5309.34 1086.55 7
 -3 23 -5 6264.52 922.618 4
 -3 23 -5 5835.52 818.814 6
 3 23 -5 5129.31 881.713 6
 3 23 -5 6810.86 894.467 4
 3 23 -6 7827.37 945.348 4
 -3 23 -6 8516.53 1152.82 4
 3 23 -6 7455.85 1018.2 6
 -3 -23 -6 7892.89 748.571 5
 -3 23 -6 6651.72 966.727 6
 -3 23 -7 2386.76 692.851 6
 -3 -23 -7 2299.49 510.542 5
 3 23 -7 1608.73 604.614 6
 3 23 -8 19445.9 1686.84 6
 -3 23 -8 18587.4 1547.52 6
 -3 -23 -8 18143.9 1260.88 5
 3 23 -9 6815.91 1046.55 6
 -3 -23 -9 8478.42 966.322 5
 -3 23 -9 7189.36 1056.97 6
 -3 23 -10 8159.29 1161.88 6
 3 23 -10 8748.71 1275.1 6
 -3 -23 -10 7206.66 943.653 5
 -3 23 -11 668.635 516.34 6
 -3 -23 -11 1531.38 705.588 5
 3 23 -11 359.702 636.45 6
 3 23 -12 27821.3 2140.24 6
 -3 -23 -12 25894.1 1762.64 5
 -3 23 -12 28558 2154.76 6
 -3 23 -13 2072.5 771.645 6
 3 23 -13 1585.99 647.915 6
 -3 -23 -13 1304.02 627.432 5
 -3 23 -14 106.64 474.42 6
 -3 -23 -14 -209.761 510.37 5
 3 23 -14 208.307 448.08 6
 -3 -23 -15 4707.91 862.738 5
 3 23 -15 4683.12 891.227 6
 -3 -23 -16 1743.92 573.149 5
 3 23 -16 2046.16 608.834 6
 3 -23 -17 637.012 384.673 5
 -3 -23 -17 634.627 469.592 5
 3 23 -17 456.012 331.846 6
 3 -23 -18 441.142 321.282 5
 -3 -23 -18 350.936 319.298 5
 3 23 -18 174.084 332.156 6
 -3 25 0 228.664 369.255 4
 3 25 0 98.9436 418.943 4
 3 25 -1 76905.1 2830.85 4
 -3 25 1 76057.6 2791.59 4
 -3 25 -1 77650.6 2735.12 4
 -3 25 -1 78370.8 2478.69 6
 3 25 -2 7580.75 870.995 6
 -3 25 -2 8169.87 986.109 4
 -3 25 -2 6558.03 771.849 6
 3 25 -2 7053.08 906.297 4
 -3 25 2 7756.54 1051.13 4
 3 25 -3 41064.6 2076.21 4
 3 25 -3 39852.2 2053.03 6
 -3 25 -3 37916.4 2031.83 4
 3 25 -3 39266.4 2492.01 7
 -3 25 -3 39097.6 1909.9 6
 -3 25 -4 13774.6 1219.53 6
 3 25 -4 16025.3 1682.05 7
 3 25 -4 14092.2 1287.09 6
 -3 25 -4 14077.6 1343.97 4
 3 25 -4 14102.1 1262.76 4
 3 25 -5 4133.84 805.226 4
 -3 25 -5 4471.77 803.661 6
 3 25 -5 4966.54 830.024 6
 -3 25 -5 4025.68 812.52 4
 3 25 -6 17870.8 1483.73 4
 3 25 -6 16132.7 1457.19 6
 -3 25 -6 16242.5 1617.47 4
 -3 25 -6 16818.7 1434.99 6
 -3 -25 -7 16866.7 1134.21 5
 -3 25 -7 16859 1501.18 6
 -3 25 -8 42255.8 2376.85 6
 3 25 -8 41345.4 2483.71 6
 -3 -25 -8 41125.6 1828.77 5
 -3 25 -9 1963.81 820.816 6
 -3 -25 -9 1570.86 574.753 5
 3 25 -9 2393.34 861.288 6
 3 25 -10 41338.5 2560.9 6
 -3 -25 -10 38581.1 1991.44 5
 -3 25 -10 40021.5 2479.43 6
 3 25 -11 3562.19 963.784 6
 -3 25 -11 2948.77 726.394 6
 -3 -25 -11 3978.14 784.447 5
 -3 -25 -12 13352.7 1279.87 5
 3 25 -12 13975.6 1511.3 6
 -3 25 -12 14347.8 1519.98 6
 -3 25 -13 3324.65 883.043 6
 3 25 -13 3959.44 925.411 6
 -3 -25 -13 4428.85 861.161 5
 3 25 -14 23100 1830.91 6
 -3 -25 -14 25898 1742.05 5
 -3 25 -14 24871 1914.77 6
 3 25 -15 4989.64 846.553 6
 -3 -25 -15 4715.22 785.821 5
 3 -25 -15 5330.43 848.215 5
 3 -25 -16 5963.39 821.871 5
 3 25 -16 5042.31 842.072 6
 -3 -25 -16 4608.87 723.571 5
 3 25 -17 4169.97 684.563 6
 -3 -25 -17 3581.65 621.079 5
 3 -25 -17 4446.43 636.062 5
 -3 27 0 2037.89 637.061 4
 3 27 0 1821.88 683.35 4
 3 27 -1 30124.8 1861.49 4
 -3 27 1 29811.7 1877.04 4
 -3 27 -1 27935.1 1776.57 4
 3 27 1 27003.7 1908.16 4
 3 27 -2 1680.89 576.069 4
 3 27 -2 1427.9 508.061 6
 -3 27 -2 1098.71 405.873 4
 -3 27 -2 724.827 411.05 6
 -3 27 2 1128.73 577.363 4
 3 27 -3 44607.3 2194.59 6
 -3 27 -3 41035.6 2055.64 6
 -3 27 -3 45767.4 2328.56 4
 -3 27 3 43342.8 2390.23 4
 3 27 -3 43682.6 2288.2 4
 3 27 -3 46478.9 2801.74 7
 -3 27 -4 11108.4 1138.92 6
 3 27 -4 11618.9 1513.32 7
 -3 27 -4 11994.1 1283.67 4
 3 27 -4 12509 1246.08 6
 3 27 -4 11686.8 1252.37 4
 -3 27 -5 9840.92 1192.75 4
 3 27 -5 11521.8 1267.56 6
 -3 27 -5 10429.7 1172.75 6
 3 27 -5 11514 1263.15 4
 -3 27 -6 3050.02 902.441 4
 -3 27 -6 2412.89 689.496 6
 3 27 -6 3080.76 759.065 4
 3 27 -6 3160.43 802.671 6
 -3 27 -7 12429.3 1331.19 6
 3 27 -7 12110.5 1356.8 6
 -3 27 -8 30102.5 2092.06 6
 3 27 -8 26819.5 2062.35 6
 -3 -27 -9 3152.36 606.138 5
 -3 27 -9 3248.42 896.821 6
 3 27 -9 3389.1 864.884 6
 3 27 -10 47584.5 2747.75 6
 -3 27 -10 47256.3 2712.89 6
 -3 -27 -10 47345.6 2173.04 5
 -3 27 -11 919.295 580.877 6
 3 27 -11 1104.65 691.736 6
 -3 -27 -11 546.143 562.403 5
 -3 27 -12 21233.4 1869.84 6
 3 27 -12 19176.6 1767.06 6
 -3 -27 -12 20677.3 1538.38 5
 3 27 -13 6198.45 1029.88 6
 -3 27 -13 7104.38 1115.24 6
 -3 -27 -13 7547.35 935.64 5
 3 -27 -14 28414.4 1751.06 5
 3 27 -14 25457.5 1951.87 6
 -3 -27 -14 27344.2 1688.25 5
 3 -27 -15 6354.16 870.881 5
 -3 -27 -15 6719.74 906.135 5
 3 27 -15 5941.25 929.318 6
 -3 -27 -16 1447.24 451.751 5
 3 -27 -16 1933.01 496.844 5
 3 27 -16 2313.88 597.153 6
 -3 -27 -17 6978.01 728.717 5
 3 27 -17 6351.31 785.726 6
 -3 29 0 596.725 613.784 4
 3 29 0 180.72 507.317 4
 3 29 -1 28019.7 1883.67 4
 3 29 1 27405.9 1939.22 4
 -3 29 -1 28635.4 1845.52 4
 -3 29 1 29431.8 1911.56 4
 -3 29 -2 4938.38 952.316 4
 -3 29 2 5728.41 994.596 4
 3 29 -2 5791.91 935.223 4
 3 29 -3 17274.9 1521.58 4
 -3 29 3 17600.4 1607.91 4
 3 29 -3 15934.4 1711.66 7
 -3 29 -3 20015.7 1648.1 4
 3 29 -3 12426.3 1202.47 6
 -3 29 -3 15214.3 1285.78 6
 -3 29 -4 1414.32 740.444 4
 -3 29 -4 600.253 420.058 6
 3 29 -4 -244.177 494.275 6
 -3 29 4 1680.32 805.186 4
 3 29 -4 931.53 529.014 4
 -3 29 -5 274.124 413.694 6
 3 29 -5 114.792 421.068 6
 -3 29 -5 -360.993 662.557 4
 3 29 -6 13821.9 1437.3 4
 -3 29 -6 12993.2 1352.42 6
 3 29 -6 11979.6 1350.41 6
 -3 29 -6 10007.3 1397.03 4
 -3 29 -7 1359.01 648.972 6
 3 29 -7 1229.36 517.159 6
 -3 29 -8 2304.49 772.097 6
 3 29 -8 1782.83 771.202 6
 3 29 -9 1927.05 672.997 6
 -3 29 -9 2313.65 755.61 6
 -3 29 -10 4502.37 959.676 6
 3 29 -10 4239.9 854.578 6
 -3 29 -11 601.696 510.304 6
 3 29 -11 197.374 576.183 6
 -3 -29 -11 1025.51 436.351 5
 -3 29 -12 43364.7 2594.12 6
 3 29 -12 41140.8 2504.16 6
 -3 -29 -12 43386.1 2130.72 5
 3 29 -13 3332.36 786.769 6
 -3 29 -13 2576.73 732.79 6
 -3 -29 -13 2179.86 620.05 5
 3 29 -14 232.126 392.3 6
 -3 -29 -14 377.972 417.779 5
 -3 -29 -15 5148.6 757.479 5
 3 29 -15 5083.15 895.4 6
 -3 -29 -16 2733.96 512.58 5
 3 29 -16 2313.57 512.581 6
 -3 31 0 39.3201 519.821 4
 3 31 0 158.983 517.063 4
 -3 31 1 2202.92 706.856 4
 3 31 -1 1867.08 594.925 4
 3 31 1 2674.21 757.911 4
 -3 31 -1 1801.81 610.528 4
 -3 31 -2 395.451 563.556 4
 3 31 -2 58.3515 546.222 4
 3 31 2 801.479 654.327 4
 -3 31 2 110.733 578.384 4
 3 31 -2 475.901 621.205 7
 -3 31 -3 8026.34 1178.73 4
 3 31 -3 7032.04 1099.93 4
 3 31 -3 5043.14 777.042 6
 -3 31 3 7458.74 1186.58 4
 -3 31 -4 1359.78 682.768 4
 3 31 -4 896.191 446.882 6
 -3 31 4 1200.22 734.337 4
 3 31 -4 1113.87 697.353 4
 -3 31 -4 1240.57 718.117 6
 3 31 -5 4619.35 822.098 6
 -3 31 -5 5785.84 1072.46 4
 3 31 -5 6144.57 1092.47 4
 -3 31 5 5906.25 1147.67 4
 -3 31 -5 5639.78 909.398 6
 3 31 -6 15203.1 1467.54 6
 -3 31 -6 14096.7 1441.49 6
 3 31 -7 16151.9 1578.35 6
 -3 31 -7 16284.3 1627.96 6
 3 31 -8 5854.02 1053.39 6
 -3 31 -8 5363.99 994.267 6
 -3 31 -9 -348.538 557.999 6
 3 31 -9 -452.91 555.741 6
 3 31 -10 623.615 480.405 6
 -3 31 -10 2469.19 768.784 6
 -3 31 -11 341.043 542.626 6
 3 31 -11 961.27 582.239 6
 3 31 -12 2120.25 721.13 6
 -3 31 -12 1586.5 661.47 6
 3 31 -13 -928.608 591.614 6
 3 31 -14 947.96 475.431 6
 -3 31 15 1286.04 500.589 4
 3 31 -15 2021.31 521.295 6
 3 31 -16 293.669 297.469 6
 -3 33 0 153.459 545.627 4
 3 33 0 -1686.32 836.085 4
 3 33 -1 34283.1 2254.07 4
 -3 33 -1 28959.3 2013.74 4
 -3 33 1 30643.6 2078.23 4
 3 33 -2 12513.6 1429.75 4
 3 33 2 8605.08 1252.97 4
 -3 33 2 11613.1 1349.62 4
 -3 33 -2 12417.6 1448.63 4
 3 33 -2 14732.4 1789.43 7
 -3 33 3 10245.2 1323.97 4
 3 33 3 7006.73 1238.34 4
 3 33 -3 10675.9 1290.15 4
 -3 33 -3 9909.09 1286.43 4
 -3 33 -4 1677.32 962.047 4
 3 33 -4 360.884 683.016 4
 -3 33 4 291.162 642.212 4
 3 33 4 -616.867 945.58 4
 3 33 -4 -108.322 458.72 6
 -3 33 -5 21911.4 1973.18 4
 3 33 -5 20516.2 1846.39 4
 -3 33 -5 14133.3 1429.27 6
 -3 33 5 20096 1936.4 4
 3 33 -5 13832.4 1361.12 6
 -3 33 6 26532.2 2211.24 4
 -3 33 -6 28939.8 2060.6 6
 3 33 -6 25672.1 1959.16 6
 3 33 -7 4403.65 940.831 6
 -3 33 -7 4707.88 968.738 6
 -3 33 7 5092.4 1149.93 4
 3 33 -8 24249.9 1963.1 6
 -3 33 8 22376.1 2135.12 4
 -3 33 -8 23570.5 1930.98 6
 -3 33 -9 1617.05 602.061 6
 3 33 -9 2185.65 694.618 6
 3 33 -10 10134 1302.23 6
 -3 33 -10 9455.72 1341.28 6
 3 33 -11 545.113 455.214 6
 3 33 -12 11850.8 1308.18 6
 -3 33 13 2849.89 803.113 4
 3 33 -13 1647.39 536.905 6
 3 33 -14 5426.86 848.141 6
 -3 33 14 6465.77 1022.19 4
 3 33 -15 5866.83 809.516 6
 -3 33 15 4649.87 761.51 4
 -3 35 0 3626.42 951.392 4
 3 35 0 3149.48 878.717 4
 3 35 1 77906.7 3420.81 4
 -3 35 1 81582.4 3442.73 4
 3 35 -1 86131 4012.98 7
 3 35 -1 77638.8 3316.29 4
 -3 35 -1 81488.3 3407.33 4
 -3 35 2 -144.355 696.748 4
 3 35 -2 1435.35 790.927 4
 -3 35 -2 1491.02 737.7 4
 3 35 2 1090.06 583.581 4
 -3 35 3 412.11 621.868 4
 3 35 -3 149.228 548.09 4
 -3 35 -3 246.261 627.346 4
 3 35 3 373.99 641.961 4
 3 35 -4 16791.2 1443 6
 3 35 4 12612.2 1619.66 4
 -3 35 4 14234.9 1620.71 4
 3 35 -4 17666.8 1688.18 4
 -3 35 -4 15637.3 1637.49 4
 3 35 -5 34057 2380.1 4
 -3 35 -5 35468.5 2490.1 4
 3 35 5 37639.2 2651.51 4
 -3 35 5 39193.4 2561.62 4
 -3 35 6 13502.1 1567.25 4
 3 35 -6 10055.8 1182.86 6
 3 35 -7 5800.75 968.493 6
 -3 35 7 5387.46 1188.43 4
 -3 35 8 27256.4 2256.01 4
 3 35 -8 28107.4 2046.29 6
 3 35 -9 1400.94 729.913 6
 -3 35 9 779.246 829.703 4
 -3 35 10 18669 1832.45 4
 3 35 -10 18476.6 1669.3 6
 3 35 -11 440.598 474.331 6
 -3 35 11 899.192 618.531 4
 -3 35 12 15256.8 1528.97 4
 3 35 -12 17689.9 1533.81 6
 3 35 -13 3209.92 694.277 6
 -3 35 13 2311.07 692.28 4
 3 35 -14 9293.25 976.51 6
 -3 35 14 8919.91 1054.49 4
 3 37 0 1502.5 646.175 4
 3 37 0 590.299 733.951 7
 -3 37 0 1036.48 683.563 4
 -3 37 -1 4451.18 900.796 4
 -3 37 1 6061.12 1063.16 4
 3 37 1 6801.14 1156.59 4
 3 37 -1 6260.09 1020.98 4
 -3 37 -2 5253.3 965.923 4
 3 37 -2 5589.94 1049.33 4
 3 37 2 6633.65 1124.81 4
 -3 37 2 5419.84 997.413 4
 -3 37 3 28054.7 2088.71 4
 3 37 3 26232.9 2052.33 4
 3 37 -3 29268.6 2158.49 4
 -3 37 -3 28600.5 2135.93 4
 3 37 4 7391.06 1261.31 4
 -3 37 4 7872.68 1237.51 4
 -3 37 -4 8844.51 1326.91 4
 3 37 -4 10001.1 1340.77 4
 -3 37 5 -86.0841 652.021 4
 3 37 5 950.241 679.611 4
 3 37 -5 863.077 447.301 6
 -3 37 -5 220.041 653.595 4
 3 37 -6 3550.96 810.348 6
 -3 37 6 3248.12 893.853 4
 3 37 6 3607.04 970.475 4
 3 37 -7 2096.59 592.685 6
 3 37 7 2512.02 959.353 4
 -3 37 7 1598.42 768.55 4
 -3 37 8 6736.26 1220.3 4
 3 37 -8 6268.63 1021.64 6
 3 37 8 5927.16 1206.26 4
 3 37 -9 1259.28 567.395 6
 -3 37 9 917.786 567.273 4
 3 37 -10 4843.04 836.782 6
 -3 37 10 5645.01 1023.84 4
 3 37 -11 1021.79 524.546 6
 -3 37 11 -184.186 489.4 4
 3 37 -12 11235.5 1174.79 6
 -3 37 12 10395.1 1215.33 4
 3 37 -13 1029.11 428.466 6
 -3 37 13 1796.92 1010.57 4
 3 37 13 587.338 511.346 4
 3 37 14 5154.05 938.517 4
 -3 39 0 832.778 545.135 4
 3 39 0 1164.15 694.199 4
 -3 39 -1 1065.2 693.898 4
 -3 39 1 2132.56 759.412 4
 3 39 1 797.024 726.236 7
 3 39 -1 2046.84 667.772 4
 -3 39 2 810.667 666.534 4
 3 39 2 649.926 592.224 4
 3 39 -2 72.3772 599.64 4
 -3 39 -2 704.804 640.112 4
 -3 39 -3 1588.79 775.717 4
 -3 39 3 2346.54 812.543 4
 3 39 3 1193.8 525.459 4
 3 39 -3 1569.72 700.836 4
 -3 39 -4 1118.23 661.199 4
 -3 39 4 1781.63 756.689 4
 3 39 4 766.773 631.355 4
 3 39 -4 2063.57 704.723 4
 3 39 5 466.791 567.933 4
 -3 39 5 775.73 543.872 4
 3 39 6 434.19 562.865 4
 3 39 -6 1501.99 547.16 6
 -3 39 6 1777.57 763.284 4
 3 39 7 75.9665 621.135 4
 -3 39 7 466.656 539.908 4
 3 39 -7 -363.4 454.169 6
 3 39 8 183.167 658.561 4
 3 39 -8 269.362 392.351 6
 -3 39 8 779.791 686.63 4
 3 39 9 2081.01 894.596 4
 -3 39 9 2488.02 836.942 4
 3 39 -9 1559.42 573.788 6
 -3 39 10 946.154 569.622 4
 3 39 -10 195.839 330.632 6
 3 39 10 962.002 677.345 4
 -3 39 11 -7.34756 398.716 4
 3 39 -11 -504.888 381.287 6
 3 39 11 374.022 532.344 4
 -3 39 12 242.097 399.052 4
 3 39 -12 869.05 451.042 6
 3 39 13 -2.35794 448.956 4
 -3 41 0 7461.13 1105.68 4
 3 41 0 6889.59 1093.86 4
 3 41 1 19893.7 1723.22 4
 -3 41 -1 18842.6 1701.09 4
 3 41 -1 21814.5 1850.95 4
 -3 41 1 20876.3 1794.1 4
 3 41 -2 -221.715 586.045 4
 3 41 2 1378.33 620.013 4
 -3 41 2 582.965 557.641 4
 -3 41 -2 -543.881 541.006 4
 -3 41 -3 7834.18 1214.09 4
 3 41 -3 8791.39 1197.15 4
 3 41 3 8326.77 1183.62 4
 -3 41 3 6623.71 1028.42 4
 -3 41 -4 3441.31 897.675 4
 -3 41 4 2334.2 768.434 4
 3 41 4 1894.83 658.644 4
 -3 41 5 2533.82 813.714 4
 3 41 5 2319.33 647.525 4
 -3 41 6 4363.46 925.743 4
 3 41 6 4333.79 1039.28 4
 3 41 7 4278.91 933.274 4
 -3 41 7 3888 866.826 4
 3 41 -7 3703.1 730.79 6
 -3 41 8 10806.6 1237.79 4
 3 41 8 11044.1 1365.83 4
 3 41 -8 9209.36 1066.19 6
 3 41 -9 134.148 376.869 6
 -3 41 9 1632.14 633.119 4
 3 41 9 676.881 572.902 4
 3 41 -10 7083.6 903.489 6
 -3 41 10 7609.48 999.374 4
 3 41 10 7750.01 1151.46 4
 -3 41 11 558.695 392.314 4
 3 41 11 -203.279 424.357 4
 -3 43 0 1080.99 666.36 4
 3 43 0 1179.66 686.405 4
 3 43 1 30424.3 2108.01 4
 -3 43 1 31033.3 2137.89 4
 3 43 -1 32591.8 2194.49 4
 -3 43 -1 33245.3 2206.48 4
 -3 43 2 1945.49 671.525 4
 3 43 2 1911.16 693.626 4
 -3 43 -2 2053.08 771.349 4
 3 43 -2 2541.15 814.3 4
 3 43 -3 8845.99 1233.24 4
 -3 43 -3 8637.2 1172.96 4
 -3 43 3 8351.66 1179.59 4
 3 43 3 9234.05 1220.12 4
 3 43 4 2775.65 764.982 4
 -3 43 4 3158.29 731.431 4
 -3 43 5 7709.6 1097.73 4
 3 43 5 5992.01 1026.59 4
 3 43 6 6846.18 1061.42 4
 -3 43 6 7920.08 1091.19 4
 -3 43 7 4884.84 882.455 4
 3 43 7 4551.4 859.937 4
 -3 43 8 28542.5 1817.7 4
 3 43 8 27807.2 1927.37 4
 -3 43 9 1823.39 570.258 4
 3 43 9 1736.74 697.641 4
 -3 43 10 13723.4 1177.06 4
 3 43 10 14172.9 1319.25 4
 -3 45 0 999.748 544.258 4
 3 45 0 1114.95 600.123 4
 3 45 1 14275.6 1402.27 4
 -3 45 1 14348.3 1423.48 4
 -3 45 -1 15488.2 1472.03 4
 3 45 -1 16490 1526.98 4
 -3 45 -2 1523.52 617.946 4
 -3 45 2 1117.83 563.276 4
 3 45 2 1639 622.479 4
 -3 45 3 7899.72 1043.31 4
 3 45 3 7352.64 1027.18 4
 3 45 4 3781.24 839.335 4
 -3 45 4 2808.53 725.236 4
 3 45 5 5309.33 906.633 4
 -3 45 5 6907.07 950.247 4
 -3 45 6 6627.58 930.226 4
 3 45 6 5433.24 881.29 4
 -3 45 7 3501.61 723.708 4
 3 45 7 2815.64 633.043 4
 3 45 8 11844.3 1142.85 4
 -3 45 8 11408.9 1083.5 4
 3 47 0 774.678 468.218 4
 -3 47 0 -780.75 522.212 4
 -3 47 -1 -795.143 541.403 4
 -3 47 1 -10.6922 394.029 4
 3 47 1 164.956 435.955 4
 -3 47 2 257.226 389.784 4
 3 47 2 334.255 411.151 4
 3 47 3 416.695 491.524 4
 -3 47 3 -27.0653 377.074 4
 -3 47 4 881.084 524.949 4
 3 47 4 228.703 419.626 4
 -3 47 5 358.499 412.016 4
 3 47 5 -272.487 457.341 4
 -3 47 6 1139.98 458.265 4
 -3 49 1 3258.95 667.239 4
 -3 49 2 25.816 339.446 4
 -3 49 3 3268.82 622.273 4
 4 0 1 11768.1 577.542 1
 4 0 2 802886 4901.72 1
 4 0 3 53000.4 1435.52 1
 4 0 4 28030.2 1197.53 1
 -4 0 -4 27962.6 1010.32 1
 4 0 5 52403.4 1860.98 1
 -4 0 -5 53383.3 1530.61 1
 -4 0 -6 1925.22 395.467 1
 4 0 6 2438.97 553.213 1
 -4 0 -7 69414.9 2067.91 1
 4 0 7 67964.9 2714.38 1
 -4 0 -8 8823.25 834.226 1
 4 0 8 8742.5 1177.66 1
 4 0 -8 10205.7 1247.81 1
 -4 0 -9 2333.86 444.933 3
 -4 0 -10 799.07 424.547 3
 -4 0 -11 10783.7 1065.79 3
 -4 0 -12 -49.0981 391.56 3
 -4 0 -13 21160.8 1623 3
 -4 0 -14 10998.9 1261.79 3
 4 0 -14 12185.8 1338.31 3
 -4 0 -15 39989 2222.84 5
 4 0 -15 44834.2 2555.45 3
 4 0 -16 43270.5 2558.25 3
 -4 0 -16 41910.4 2249.78 5
 4 0 -17 14422.3 1531.72 3
 -4 0 -17 13914.1 1306.71 5
 4 0 -18 1485.92 640.18 3
 -4 0 -18 640.522 399.294 5
 -4 0 -19 2284.92 517.162 5
 4 0 -19 2146.91 638.289 3
 -4 0 -20 -4.51699 296.863 5
 4 0 -20 1460.89 469.937 3
 4 2 0 156781 1923.9 1
 4 2 1 24593.5 822.702 1
 4 -2 1 25168.7 813.114 1
 4 -2 2 550.379 256.473 1
 -4 2 -2 645.502 258.022 1
 4 2 2 717.528 313.076 1
 4 -2 3 138860 2251.19 1
 4 2 3 133989 2348.59 1
 -4 2 -3 130846 1861.19 1
 4 -2 4 315006 3834.12 1
 -4 2 -4 306379 3111.8 1
 4 2 4 306365 4032.34 1
 4 -2 5 103458 2566.15 1
 -4 2 -5 99051.4 1987.46 1
 4 2 5 97090.7 2591.41 1
 -4 -2 -5 99731 2168.15 1
 -4 2 -6 27172.5 1172.22 1
 -4 -2 -6 25888.7 1248.24 1
 4 -2 6 25673 1488.13 1
 4 2 6 24515.5 1505.58 1
 -4 2 -7 2391.47 451.628 1
 -4 -2 -7 2012.12 466.773 1
 4 2 7 2700.01 672.879 1
 4 -2 7 2357.95 668.437 1
 4 2 -8 -266.634 467.048 1
 -4 2 -8 215.165 244.137 1
 4 -2 8 -152.025 537.384 1
 -4 -2 -8 -51.1954 269.712 1
 4 -2 -8 695.151 546.174 1
 4 2 8 666.05 550.145 1
 -4 2 -9 6021.88 701.875 3
 -4 2 -9 6137.34 751.363 1
 -4 -2 -9 5217.02 652.586 3
 -4 -2 -10 406.616 322.706 3
 -4 2 -10 244.852 358.495 3
 -4 -2 -11 7075.36 892.644 3
 -4 2 -11 5884.13 835.557 3
 -4 2 -12 1992.1 629.672 3
 -4 -2 -12 1418.19 590.745 3
 -4 2 -13 20118.2 1611.34 3
 -4 -2 -13 23133.1 1659.09 3
 4 2 -13 19399.2 1641.44 3
 4 2 -14 9163.59 1146.99 3
 4 -2 -14 12433.2 1420.27 3
 -4 2 -14 11396.4 1262.13 3
 4 -2 -15 16819.7 1630.27 3
 -4 -2 -15 18380.5 1586.37 5
 4 2 -15 18488.3 1689.94 3
 -4 2 -15 14070.9 1265.48 5
 4 2 -16 19623.2 1749.75 3
 4 -2 -16 18814.2 1766.53 3
 -4 2 -16 19267.7 1524.63 5
 -4 -2 -16 19574.6 1648.07 5
 4 -2 -17 2799.44 881.168 3
 -4 -2 -17 2328.48 695.322 5
 -4 2 -17 2807.75 690.722 5
 4 2 -17 3317.72 806.975 3
 4 2 -18 17077.6 1554.28 3
 4 -2 -18 16140.1 1531.09 3
 -4 2 -18 16103.7 1247.14 5
 -4 -2 -18 16739.3 1346.47 5
 -4 -2 -19 -351.955 400.485 5
 4 2 -19 -665.881 500.878 3
 4 -2 -19 107.393 419.257 3
 -4 2 -19 -319.177 400.105 5
 -4 -2 -20 -134.322 297.638 5
 4 2 -20 425.417 349.602 3
 4 4 0 86948.5 1470.81 1
 4 4 1 26742.2 902.846 1
 4 -4 1 27498.5 840.861 1
 4 -4 2 111053 1777.47 1
 4 4 2 110319 1981.54 1
 4 -4 3 6673.24 563.43 1
 4 4 3 6255.42 607.804 1
 -4 4 -3 6311.12 453.513 1
 -4 4 -4 109343 1813.27 1
 4 -4 4 110151 2244.57 1
 4 -4 5 21761.1 1173.99 1
 -4 4 -5 20817.2 882.838 1
 4 4 5 20025.7 1250.53 1
 -4 -4 -5 20403.6 1045.47 1
 -4 -4 -6 234.687 246.441 1
 4 -4 6 231.426 338.581 1
 -4 4 -6 17.1737 236.53 1
 4 4 6 86.5562 373.022 1
 -4 4 -7 19820 1047.42 1
 4 4 7 21082.6 1609.58 1
 -4 -4 -7 20162.2 1212.55 1
 4 -4 -7 19377 1658.14 1
 4 -4 7 21417.6 1531 1
 -4 4 -8 11211.3 860.76 1
 -4 -4 -8 11454.7 1012.87 1
 4 -4 -8 11309.9 1341.99 1
 4 4 -8 10853.9 1210.59 1
 4 -4 8 12466.6 1306.53 1
 4 4 -9 49228.4 2522.49 1
 -4 -4 -9 48478.2 1907.75 3
 -4 4 -9 47166.2 1846.84 1
 -4 4 -9 47700.5 1947.7 3
 -4 4 -10 1136.39 361.076 6
 -4 4 -10 1194.7 427.746 3
 -4 -4 -10 1133.71 454.929 3
 -4 4 -11 3581.8 706.719 3
 -4 -4 -11 3012.14 580.293 3
 -4 4 -12 176.292 419.41 3
 -4 -4 -12 -92.6225 437.973 3
 4 4 -13 437.473 468.296 3
 -4 4 -13 -308.27 537.619 3
 4 4 -14 4607.4 950.18 3
 4 -4 -14 4228.09 960.84 3
 -4 -4 -14 4188.66 840.161 3
 4 -4 -15 8721.79 1251.91 3
 -4 -4 -15 9174.41 1195.81 5
 4 4 -15 8810.03 1165.94 3
 -4 4 -15 6591.01 922.796 5
 -4 4 -16 6912.74 831.599 5
 4 -4 -16 9274.49 1215.13 3
 4 4 -16 9956.37 1346.56 3
 -4 -4 -16 10325.1 1282.1 5
 -4 4 -17 8744.29 984.592 5
 4 -4 -17 9850.81 1216.28 3
 4 4 -17 7639.81 1086.51 3
 -4 -4 -17 8555.45 1110.99 5
 4 4 -18 232.212 518.274 3
 -4 4 -18 -319.493 388.01 5
 -4 -4 -18 803.699 501.604 5
 4 -4 -18 1038.54 637.597 3
 -4 -4 -19 1495.88 493.798 5
 4 -4 -19 1566.55 540.311 3
 4 4 -19 233.031 383.406 3
 4 -4 -20 12644.6 1106.47 3
 -4 -4 -20 11490.3 954.39 5
 4 6 0 242914 2518.29 1
 4 6 1 16512.3 844.555 1
 -4 -6 -1 17717.8 798.294 1
 4 6 -1 16394.7 738.613 1
 4 6 2 75794.1 1706.31 1
 4 -6 2 60922.2 1265.09 1
 4 6 3 50754 1577.92 1
 4 -6 3 59053.9 1421.81 1
 -4 6 -4 90230.5 1589.39 1
 4 6 4 88896.4 2373.46 1
 -4 -6 -4 93788.1 2083.28 1
 4 -6 5 3122.83 531.447 1
 4 6 5 2178.4 497.507 1
 -4 -6 -5 3128.86 471.707 1
 -4 6 -5 2802.38 361.467 1
 4 6 6 3162.23 605.27 1
 -4 -6 -6 3356.91 558.271 1
 -4 6 -6 3188.15 399.138 1
 4 -6 6 3093.66 609.126 1
 -4 6 -7 5264.41 533.508 1
 4 6 7 5106.87 901.01 1
 -4 -6 -7 4738.36 620.111 1
 4 -6 7 5856.4 856.67 1
 4 -6 -7 6238.3 1027.09 1
 4 6 -8 -24.8371 440.61 1
 4 -6 8 295.831 472.346 1
 -4 6 -8 1260.7 412.419 1
 -4 6 -8 965.031 324.627 3
 -4 6 -9 115432 2863.6 6
 -4 -6 -9 120478 2924.26 3
 -4 6 -9 118065 2794.82 1
 -4 6 -9 123187 3039.25 3
 4 6 -9 117625 3849.29 1
 -4 6 -10 9680.89 932.612 6
 -4 6 -10 9573.87 991.47 3
 -4 -6 -10 9870.55 986.553 3
 -4 6 -11 87280 2733.34 6
 -4 6 -11 91818.2 2952.22 3
 -4 -6 -11 86744.8 2871.58 3
 4 6 -12 7486.18 1017.86 3
 -4 6 -12 7479.08 1010.26 3
 -4 -6 -12 6628.54 925.499 3
 -4 6 -12 6871.41 866.542 6
 4 6 -13 15683.8 1417.72 6
 -4 6 -13 16515.1 1388.98 3
 4 6 -13 15971.8 1461.25 3
 4 6 -14 3700.67 815.558 3
 4 6 -14 5078.35 837.913 6
 4 -6 -14 5517.2 1133.03 3
 -4 -6 -14 2480.27 613.617 3
 -4 6 -14 2582.4 606.493 5
 4 6 -15 -996.604 692.303 3
 4 -6 -15 -336.606 600.613 3
 -4 6 -15 1209.54 660.507 5
 -4 -6 -15 126.366 621.011 5
 -4 6 -16 16532.7 1309.94 5
 -4 -6 -16 16607.1 1533.61 5
 4 6 -16 16179.9 1520.06 3
 4 -6 -16 16404 1544.1 3
 4 6 -17 524.47 455.921 3
 4 -6 -17 96.4545 482.114 3
 -4 -6 -17 356.963 535.088 5
 -4 -6 -18 8676.47 1073.17 5
 4 6 -18 8714.1 1082.38 3
 4 -6 -18 7334.77 1076.66 3
 -4 -6 -19 3251.76 680.968 5
 4 -6 -19 3243.01 693.667 3
 4 6 -19 3134.79 676.133 3
 4 -6 -20 24122.4 1498.19 3
 -4 -6 -20 24798.5 1375.96 5
 4 8 0 637434 4280.91 1
 4 8 1 19126.9 874.388 1
 -4 -8 -1 19811.9 795.717 1
 4 8 -1 19938.3 762.175 1
 4 8 -2 36151 967.909 1
 -4 -8 -2 35474.5 1109.77 1
 4 8 2 36256.4 1275.91 1
 4 8 3 827.467 368.856 1
 4 -8 3 1967.05 339.194 1
 -4 -8 -3 1405.02 323.119 1
 4 8 4 28747.6 1438.17 1
 -4 -8 -4 29603.5 1228.18 1
 4 -8 4 31236.6 1173.97 1
 -4 8 -5 19717.9 805.313 1
 4 -8 5 20290.4 1105.07 1
 -4 -8 -5 19307.5 1101.17 1
 4 8 5 17852.3 1266.96 1
 -4 8 -6 7877.54 559.7 1
 4 8 6 7226.69 947.846 1
 4 -8 6 8195.18 839.395 1
 -4 -8 -6 7376.72 754.496 1
 4 -8 -7 4747.36 872.851 1
 -4 -8 -7 5386.7 689.038 1
 4 -8 7 6529.45 868.249 1
 -4 8 -7 4920.22 495.138 1
 -4 8 -8 9260.4 728.984 1
 4 8 -8 9288.2 1035.94 1
 -4 8 -8 10436.1 844.979 3
 -4 8 -9 48859 1721.7 1
 4 8 -9 47646 2333.82 1
 -4 8 -9 51175.2 1985.23 3
 -4 -8 -9 46881.4 1819.36 3
 -4 8 -9 48962.8 1958.93 6
 -4 8 -10 579.964 432.187 6
 -4 8 -10 1270.68 539.101 3
 -4 -8 -10 1638.35 507.4 3
 -4 8 -11 186993 4189.61 6
 -4 8 -11 188095 4190.57 3
 -4 -8 -11 181460 4005.8 3
 -4 -8 -12 6715.96 950.069 3
 -4 8 -12 6676.34 920.824 6
 4 8 -12 6746.05 976.034 3
 -4 8 -13 16865.2 1355.39 6
 -4 8 -13 15455.5 1229.35 5
 -4 -8 -13 14049.7 1333.11 3
 4 8 -13 16040.8 1433.82 3
 4 8 -13 16197 1448.74 6
 4 8 -14 582.96 466.306 6
 4 8 -14 1138.95 687.092 3
 4 -8 -14 98.5597 554.471 3
 -4 -8 -15 5691.73 1020.7 5
 4 -8 -15 5339.82 1011.76 3
 4 8 -15 5409.58 948.821 3
 4 8 -15 4809.83 890.893 6
 4 -8 -16 1616.87 680.932 3
 -4 -8 -16 2509.55 771.828 5
 4 8 -16 2470.44 735.627 3
 -4 -8 -17 4053.42 798.008 5
 4 -8 -17 4814.09 986.719 3
 4 8 -17 3715.1 832.268 3
 4 8 -18 26016.8 1727.53 3
 4 -8 -18 25417.4 1817.96 3
 -4 -8 -18 27013.1 1748.08 5
 4 8 -19 3295.81 616.416 3
 -4 -8 -19 3440.54 719.516 5
 4 -8 -19 1797.74 550.933 3
 -4 -8 -20 32018.8 1554.58 5
 4 -8 -20 32793.8 1666.97 3
 4 10 0 256986 2912.93 1
 4 10 1 633.419 292.386 1
 4 10 -1 1088.93 268.241 1
 -4 -10 -1 1029.29 305.87 1
 4 10 -2 76026 1416.88 1
 -4 -10 -2 74191.2 1641.81 1
 4 10 2 72524.2 1931.88 1
 4 -10 2 71266 1397.36 1
 4 10 3 43927.5 1693.29 1
 -4 -10 -3 45406.6 1441.9 1
 4 10 4 21762.8 1327.82 1
 -4 -10 -4 23166.4 1142.07 1
 4 -10 4 25015.3 1011.43 1
 -4 -10 -5 3320.84 546.469 1
 4 -10 5 3703.69 514.349 1
 4 10 5 3426.35 703.795 1
 4 -10 6 1682.85 469.56 1
 4 10 6 1144.96 499.937 1
 -4 -10 -6 897.766 319.059 1
 -4 10 -6 1448.93 268.97 1
 4 -10 -6 799.182 515.539 1
 4 -10 -7 7565.73 1134.65 1
 -4 10 -7 8639.65 625.385 1
 4 -10 7 8266.15 895.445 1
 4 10 -7 7890.9 919.549 1
 -4 -10 -7 8040.01 875.644 1
 -4 10 -8 2900.23 541.507 6
 -4 10 -8 3577.97 433.797 1
 4 10 -8 3217.83 652.655 1
 -4 10 -9 100832 2911.47 6
 -4 -10 -9 94011.5 2513.07 3
 -4 10 -10 2260.99 625.555 6
 -4 -10 -10 1575.02 448.896 3
 -4 10 -11 207582 4671.97 6
 4 10 -11 213388 4720.44 3
 -4 -10 -11 202326 4138.79 3
 -4 10 -12 12859 1251.39 6
 -4 -10 -12 10431.6 1142.49 3
 4 10 -12 11572.9 1245.48 3
 4 10 -13 16488.8 1522.45 6
 -4 10 -13 18908 1514.21 6
 4 10 -13 16660.5 1473.75 3
 4 10 -14 6434.95 1002.06 3
 4 -10 -14 6750.92 1204.83 3
 4 10 -14 5213.26 954.444 6
 -4 -10 -14 4971.63 893.535 3
 -4 -10 -14 6114.04 1094.16 5
 4 -10 -15 876.921 612.303 3
 4 10 -15 732.668 470.545 6
 -4 -10 -15 834.934 658.058 5
 4 10 -15 634.395 477.536 3
 4 10 -16 889.372 526.485 3
 -4 -10 -16 1138.73 748.004 5
 4 -10 -16 620.293 453.567 3
 4 -10 -17 2605.94 714.002 3
 4 10 -17 2804.74 703.123 3
 -4 -10 -17 4209.43 957.711 5
 -4 -10 -18 8060.86 1022.83 5
 4 -10 -18 6631.4 1007.06 3
 4 10 -18 6899.98 913.036 3
 -4 -10 -19 2228.42 566.329 5
 4 -10 -19 1903.3 566.839 3
 4 -10 -20 35170.5 1650.35 3
 -4 -10 -20 37341.6 1694 5
 4 12 0 136361 2335.28 1
 -4 -12 -1 12144 700.813 1
 4 12 -1 12595.6 655.098 1
 4 12 1 11928.3 795.876 1
 4 12 2 267.894 294.024 1
 4 12 -2 663.902 202.497 1
 -4 -12 -2 873.664 277.558 1
 4 -12 2 -75.5438 242.345 1
 -4 -12 -3 14.1352 235.608 1
 4 -12 3 287.877 184.592 1
 -4 -12 -4 1718.87 433.176 1
 4 12 -4 1761.79 282.235 1
 4 -12 4 1905.88 325.78 1
 4 12 4 2459.64 565.642 1
 4 12 5 6464.15 884.343 1
 4 -12 -5 6652.78 988.102 1
 4 -12 5 6310.13 576.098 1
 -4 -12 -5 5153.08 640.096 1
 -4 -12 -6 114339 2924.4 1
 4 -12 6 118901 2633 1
 4 -12 -6 115889 3837.74 1
 4 12 6 108084 3697.14 1
 4 12 -7 18268.6 1201.99 1
 -4 12 -7 19864.6 1242.18 6
 -4 12 -8 2133.12 503.149 6
 -4 12 -9 77024.9 2695.99 6
 -4 -12 -9 72025.1 2227.83 3
 -4 12 -10 5679.16 844.318 6
 4 12 -10 5961.65 826.536 3
 -4 -12 -10 5684.72 714.733 3
 -4 12 -11 25654.1 1730.99 6
 -4 -12 -11 22174.6 1437.52 3
 4 12 -11 26913.5 1706.96 3
 4 12 -12 36.3097 458.499 6
 4 12 -12 582.406 599.885 3
 -4 12 -12 672.573 446.559 6
 -4 -12 -12 187.038 384.808 3
 -4 12 -13 2659.45 634.396 6
 4 12 -13 1799.91 528.939 6
 -4 -12 -13 2824.02 634.537 3
 4 12 -14 1175.04 574.071 6
 4 -12 -14 2044.93 794.595 3
 -4 12 -14 1468.9 624.229 6
 -4 -12 -14 1443.05 726.89 5
 4 12 -14 2307.43 691.333 3
 4 12 -15 3201.93 694.064 6
 4 12 -15 3150.69 726.785 3
 -4 -12 -15 4009.34 909.696 5
 4 -12 -15 2101.34 629.918 3
 4 -12 -16 3511.14 847.91 3
 4 12 -16 2920.02 710.335 6
 4 12 -16 4042.42 763.086 3
 -4 -12 -16 2960.18 799.325 5
 -4 -12 -17 363.342 495.846 5
 4 12 -17 -271.663 341.067 3
 4 -12 -17 28.125 488.46 3
 4 -12 -18 1732.99 600.77 3
 4 12 -18 2018.29 516.946 3
 -4 -12 -18 2050.15 678.361 5
 -4 -12 -19 766.149 482.027 5
 4 -12 -19 469.066 357.39 3
 -4 -12 -20 6744.58 744.252 5
 4 -12 -20 6834.6 823.964 5
 4 14 0 97576.3 2130 1
 4 14 -1 1396.67 276.957 1
 -4 -14 -1 1606.37 314.09 1
 4 14 1 1398.3 402.271 1
 -4 -14 -2 3471.42 432.557 1
 4 14 -2 2882.7 323.718 1
 4 -14 2 3372.97 301.078 1
 4 14 2 3657.84 591.33 1
 -4 -14 -3 13867.6 881.68 1
 4 -14 3 14876.8 592.944 1
 4 14 3 13327.9 1072.08 1
 4 -14 4 36374.4 1011.76 1
 4 -14 -4 37191 2052 1
 -4 -14 -4 38082.6 1541.02 1
 4 14 4 35622.5 1915.55 1
 4 -14 5 157874 2338.88 1
 4 -14 -5 164275 4377.44 1
 -4 -14 -5 166910 3422.08 1
 4 14 5 159360 4349.82 1
 4 -14 -6 41510.4 2343.61 1
 -4 -14 -6 42239.8 1858.52 1
 -4 14 -6 43492.8 1807.35 6
 -4 14 -7 31879.5 1640.57 6
 -4 14 -8 285.832 313.683 6
 -4 14 -9 22537.7 1608.34 6
 4 14 -9 22956 1404.05 3
 4 14 -10 1.4104 364.444 3
 -4 14 -10 456.611 416.228 6
 -4 -14 -10 -50.5795 303.587 3
 -4 -14 -11 9935.55 913.914 3
 4 14 -11 8425.54 948.046 3
 -4 14 -11 10216.9 1147.83 6
 -4 14 -12 4127.39 851.953 6
 4 14 -12 2589.17 670.979 6
 -4 -14 -12 3114.96 660.495 3
 4 14 -12 2634.62 631.04 3
 -4 14 -13 6734.15 1020.62 6
 4 14 -13 3398.25 718.236 6
 4 14 -13 4700.54 803.373 3
 -4 -14 -13 6140.81 1023.04 5
 -4 14 -14 14261.8 1447.16 6
 4 14 -14 10727.1 1154.44 3
 -4 -14 -14 14449.2 1570.24 5
 4 -14 -14 12910.4 1445.4 3
 4 14 -14 12414.8 1358.91 6
 -4 -14 -15 16204.4 1564.31 5
 4 14 -15 14582.6 1396.63 6
 4 -14 -15 15636.3 1483.45 3
 4 14 -15 16132.4 1432.21 3
 4 14 -16 27173.7 1847.39 6
 4 14 -16 28122.3 1774.2 3
 4 -14 -16 26378.9 1882.46 3
 -4 -14 -16 28839.5 1940.05 5
 4 14 -17 3941.14 730.089 6
 -4 -14 -17 5258.09 913.034 5
 4 14 -17 5271.54 760.387 3
 4 -14 -17 4375.7 762.85 3
 -4 -14 -18 1112.98 600.853 5
 4 -14 -18 185.586 380.889 3
 -4 -14 -19 282.329 434.204 5
 4 -14 -19 529.406 307.341 3
 4 -14 -20 203.753 323.268 5
 -4 -14 -20 -224.871 279.929 5
 4 16 0 1859.87 291.53 1
 4 16 1 189.165 330.249 1
 4 16 -1 -26.2591 185.068 1
 -4 -16 -1 96.9587 205.443 1
 4 -16 2 116.75 103.677 1
 4 16 -2 -12.6593 144.428 1
 4 16 2 0.80797 338.355 1
 -4 -16 -2 555.291 225.941 1
 4 -16 3 12013.5 456.949 1
 -4 -16 -3 14205.1 899.765 1
 4 16 -3 10987.2 552.473 1
 4 -16 -3 13725.9 1172.71 1
 4 16 3 14030.9 1187.08 1
 -4 -16 -4 347939 4701.29 1
 4 16 -4 344561 2840.72 1
 4 -16 -4 334960 6015.77 1
 4 16 4 353305 6316.51 1
 -4 16 -5 132713 3492.04 4
 4 -16 -5 122866 3904.9 1
 -4 16 -5 123590 3106.08 6
 -4 -16 -5 126943 3078.28 1
 4 16 5 121982 4003.09 1
 -4 16 -6 63477.3 2303.01 6
 -4 -16 -6 62472.3 2054.31 5
 -4 16 -7 76148.9 2618.81 6
 -4 -16 -7 74340.4 2348.97 5
 -4 -16 -8 1286.23 527.014 5
 -4 16 -8 1056.35 512.942 6
 -4 16 -9 3929.17 751.473 6
 -4 -16 -9 3675.8 689.017 5
 4 16 -10 1030.51 352.019 3
 -4 16 -10 941.499 528.607 6
 -4 -16 -10 446.008 522.409 5
 4 16 -11 1403.01 696.33 6
 -4 16 -11 2517.31 974.719 6
 4 16 -11 622.993 400.434 3
 -4 -16 -11 2403.82 714.952 5
 4 16 -12 2250.71 583.696 3
 -4 -16 -12 2191.78 646.202 5
 -4 16 -12 2918.03 807.545 6
 4 16 -12 1807.58 659.388 6
 -4 16 -13 32319.8 2138.51 6
 4 16 -13 28342.7 2101.28 6
 -4 -16 -13 30474.5 1991.6 5
 4 -16 -13 31550.1 2011.48 3
 4 16 -14 9595.46 1247.48 6
 4 16 -14 8364.03 1010.28 3
 -4 16 -14 11962.1 1350.85 6
 4 -16 -14 9839.22 1222.82 3
 -4 -16 -14 10364.1 1205.71 5
 4 16 -15 53836.8 2412.14 3
 4 16 -15 49268.8 2581.7 6
 4 -16 -15 52584.5 2630.27 3
 -4 -16 -15 54576.2 2618.76 5
 4 16 -16 31040.5 1994.72 6
 4 16 -16 31603.8 1801.89 3
 4 -16 -16 33377 2001.41 3
 -4 -16 -16 32331.6 1988.86 5
 4 16 -17 16924.5 1386.49 6
 4 -16 -17 14669.9 1292.45 3
 -4 -16 -17 16736.2 1394.39 5
 -4 -16 -18 16412.4 1286.74 5
 4 -16 -18 12176.3 1109.01 3
 4 -16 -19 717.322 403.565 3
 -4 -16 -19 -307.323 390.753 5
 4 18 0 443.019 290.5 1
 4 -18 0 585.352 333.769 1
 4 -18 1 8237.36 461.844 1
 4 -18 1 9081.97 638.577 1
 4 -18 -1 9635.59 909.04 1
 -4 -18 -1 8522.71 603.49 1
 4 18 1 8965.25 884.985 1
 4 18 2 18062.4 1313.4 1
 -4 -18 -2 18025.1 954.942 1
 4 18 -2 17479.8 815.242 1
 4 -18 -2 18719.4 1328.46 1
 4 -18 2 14467.7 428.749 1
 4 -18 2 12739.7 540.808 1
 4 18 3 58469.3 2510.4 1
 4 -18 -3 58527.6 2482.26 1
 -4 -18 -3 59269.2 1859.06 1
 -4 18 -4 127635 3313.72 4
 -4 18 -4 123180 3108.34 6
 -4 -18 -4 124506 2894.37 1
 4 18 4 126399 3953.62 1
 4 -18 -4 125922 3843.79 1
 4 -18 -5 171207 4643.2 1
 -4 -18 -5 169716 3600.84 1
 -4 18 -5 174821 3806.54 6
 -4 18 -5 179992 4163.72 4
 4 18 -6 72499.4 3701.91 7
 -4 -18 -6 74338.3 2253.05 5
 -4 18 -6 74092.1 2608.76 6
 -4 -18 -7 82700.7 2504.48 5
 -4 18 -7 82436.4 2888.15 6
 -4 18 -8 13214.2 1227.56 6
 -4 -18 -8 12146.5 1064.78 5
 -4 18 -9 -157.269 465.589 6
 -4 -18 -9 -255.881 479.392 5
 -4 18 -10 836.622 526.745 6
 -4 -18 -10 110.216 479.712 5
 -4 18 -11 1220.66 553.267 6
 -4 -18 -11 1327.44 663.544 5
 4 18 -11 52.9137 674.826 6
 -4 18 -12 2846.92 771.737 6
 -4 -18 -12 2385.85 643.878 5
 4 18 -12 3038.86 743.547 6
 4 18 -13 17750 1664.91 6
 4 18 -13 19604.9 1431.93 3
 -4 18 -13 22117.7 1842.85 6
 -4 -18 -13 18333.6 1546.11 5
 4 -18 -13 17084.4 1483.19 3
 4 -18 -14 16776.5 1466.5 3
 -4 18 -14 17792.8 1676.31 6
 4 18 -14 16594.4 1582.72 6
 4 18 -14 18363.6 1350.88 3
 -4 -18 -14 17909 1583.07 5
 4 18 -15 34701.4 1813.98 3
 4 -18 -15 34747 2058.94 3
 -4 -18 -15 36079.6 2091.27 5
 4 18 -15 33596.7 2178.14 6
 4 18 -16 40606.9 2259.35 6
 4 -18 -16 40774.2 2119.7 3
 -4 -18 -16 42480.6 2219.97 5
 4 18 -17 10783.6 1114.51 6
 4 -18 -17 11292.8 1066.01 3
 -4 -18 -17 12411.8 1204.13 5
 4 -18 -18 11543.6 976.006 3
 -4 -18 -18 13738.3 1172.49 5
 -4 -18 -19 1446.35 476.496 5
 4 -18 -19 1316.37 475.411 5
 -4 20 0 159724 3517.24 4
 -4 20 -1 3225.56 577.777 4
 4 20 1 3586.97 634.548 1
 -4 20 1 4106.16 643.157 4
 4 -20 -1 3552.3 539.625 1
 -4 20 -2 106893 2922.66 4
 -4 -20 -2 106828 2290.41 1
 4 -20 -2 112280 3098.53 1
 4 20 2 110165 3308.01 1
 -4 20 -3 19952.7 1262.56 6
 4 -20 -3 21500.8 1520.97 1
 -4 -20 -3 20031.2 1111.64 1
 -4 20 -3 19918.1 1336.72 4
 4 20 3 19588.9 1580.7 1
 4 -20 -4 81603.7 3093.96 1
 -4 -20 -4 76663.3 2318.77 1
 -4 20 -4 78893.6 2747.36 4
 -4 20 -4 82886 2640.6 6
 4 20 -4 80910.1 3365.66 7
 -4 20 -5 57370.3 2478.71 4
 -4 -20 -5 51299.9 1763.2 5
 4 20 -5 51645.9 2997.62 7
 -4 20 -5 53055.2 2267.22 6
 -4 20 -6 46326.4 2154.22 6
 4 20 -6 41982.2 2901.06 7
 -4 20 -6 45834.9 2357.1 4
 -4 -20 -6 44001.7 1740.02 5
 -4 20 -7 42384.9 2156.13 6
 -4 -20 -7 39389.4 1738.83 5
 -4 20 -8 1514.28 602.139 6
 -4 -20 -8 1150.42 480.708 5
 -4 20 -9 1233.86 583.355 6
 -4 -20 -9 182.883 476.339 5
 4 20 -10 1110.17 654.455 6
 -4 20 -10 96.5024 476.616 6
 -4 -20 -10 659.572 599.143 5
 4 20 -11 609.441 651.906 6
 -4 20 -11 322.655 472.086 6
 -4 -20 -11 289.205 519.562 5
 4 -20 -12 587.476 445.418 3
 -4 20 -12 45.718 517.701 6
 -4 -20 -12 1021.95 723.719 5
 4 20 -12 28.3069 597.163 6
 -4 20 -13 17223.2 1652.04 6
 -4 -20 -13 16312.8 1442.36 5
 4 -20 -13 16810.8 1389.67 3
 4 20 -13 16560 1643.65 6
 -4 20 -14 3511.67 850.335 6
 4 -20 -14 4181.51 744.176 3
 -4 -20 -14 3282.71 842.934 5
 4 20 -14 3006.14 790.126 6
 4 20 -15 34834.8 2198.17 6
 4 -20 -15 36281.1 1961 3
 -4 -20 -15 36723.5 2102.23 5
 4 20 -16 32360.1 2037.14 6
 -4 -20 -16 36353.4 2052.04 5
 -4 -20 -17 5142.73 795.526 5
 4 20 -17 5530.9 809.538 6
 4 20 -18 4318.09 673.243 6
 -4 -20 -18 5146.33 774.074 5
 4 -20 -18 4486.29 753.762 5
 4 -20 -19 119.138 309.476 5
 -4 -20 -19 1074.04 371.506 5
 -4 22 0 190558 4014.77 4
 -4 22 -1 7645.1 883.896 4
 -4 22 1 7419.45 879.505 4
 -4 22 -2 14908.7 1151.26 4
 -4 22 2 13457.4 1191.74 4
 -4 22 -2 13814.2 1044.62 6
 -4 22 -3 6586.59 777.138 6
 -4 22 -3 7077.02 916.838 4
 4 22 -3 6407.42 1071.45 7
 -4 22 -4 37038 1848.89 6
 -4 22 -4 38192.2 1985.73 4
 4 22 -4 36211.7 2446.6 7
 -4 -22 -5 13822 925.785 5
 4 22 -5 14203.8 1790.41 7
 -4 22 -5 14767.2 1245.6 6
 -4 22 -5 16801.3 1423.63 4
 -4 22 -6 9347.32 1072.66 6
 4 22 -6 8185.88 1306.88 7
 -4 -22 -6 9123.4 831.378 5
 -4 22 -6 9652.77 1201.2 4
 -4 22 -7 820.085 496.855 6
 -4 -22 -7 742.126 360.75 5
 -4 -22 -8 1584.32 509.248 5
 -4 22 -8 1229.74 594.041 6
 4 22 -8 1519.79 661.474 6
 4 22 -9 6560.73 1048.49 6
 -4 -22 -9 4162.91 729.776 5
 -4 22 -9 5610.73 931.87 6
 -4 22 -10 809.816 535.452 6
 -4 -22 -10 -963.424 576.047 5
 4 22 -10 528.992 546.836 6
 4 22 -11 49326.5 2758.73 6
 -4 22 -11 51962.8 2812.06 6
 -4 -22 -11 48203.8 2307.02 5
 -4 22 -12 808.745 617.947 6
 4 22 -12 581.469 624.531 6
 -4 -22 -12 1259.1 683.147 5
 -4 -22 -13 7645.65 1036.92 5
 4 22 -13 9692.68 1283.57 6
 -4 22 -13 9100.36 1282.25 6
 -4 -22 -14 4525.79 847.744 5
 4 22 -14 4014.8 794.253 6
 4 22 -15 3812.98 788.564 6
 -4 -22 -15 4073.15 813.274 5
 -4 -22 -16 3174.48 675.512 5
 4 22 -16 3542.05 732.334 6
 4 22 -17 2348.12 570.727 6
 -4 -22 -17 2339.68 595.232 5
 4 -22 -18 655.079 405.932 5
 4 22 -18 360.613 384.716 6
 -4 -22 -18 747.142 408.852 5
 4 24 0 185118 4467.98 4
 -4 24 0 180526 4115.85 4
 4 24 -1 2863.52 725.693 4
 -4 24 -1 3256.15 697.257 4
 -4 24 1 3922.28 810.342 4
 -4 24 -2 64796.2 2516.69 4
 -4 24 2 63295.9 2623.76 4
 4 24 -2 63826 2503.11 4
 -4 24 -2 64869.5 2370.07 6
 -4 24 -3 395.491 413.967 6
 4 24 -3 -160.421 356.875 4
 -4 24 -3 -22.6646 388.729 4
 4 24 -3 357.288 690.509 7
 -4 24 -4 3752.25 644.752 6
 -4 24 -4 2960.85 576.857 4
 4 24 -4 3606.63 951.982 7
 4 24 -4 3761.04 664.81 4
 -4 24 -5 8372.92 980.595 6
 -4 24 -5 8446.73 1145.85 4
 4 24 -5 8068.13 1407.59 7
 -4 24 -6 5851.07 1049.11 4
 4 24 -6 3724.51 808.579 6
 -4 24 -6 4418.47 798.733 6
 4 24 -6 3063.26 954.839 7
 -4 -24 -6 3863.92 606.466 5
 4 24 -7 14967.2 1504.43 6
 -4 24 -7 13460.8 1344.74 6
 -4 -24 -7 12383.5 1023.87 5
 -4 24 -8 4559.96 849.714 6
 4 24 -8 5886.13 1035.98 6
 -4 -24 -8 3910.08 650.902 5
 -4 24 -9 115320 3993.62 6
 4 24 -9 117047 4185.94 6
 -4 -24 -9 109456 3178.59 5
 4 24 -10 2238.91 830.051 6
 -4 -24 -10 2438.66 718.062 5
 -4 24 -10 3100.93 1001.84 6
 4 24 -11 17567.5 1788.13 6
 -4 -24 -11 16455.5 1415.36 5
 -4 24 -11 17055.4 1656.31 6
 4 24 -12 14589.8 1592.05 6
 -4 24 -12 16217.8 1663.46 6
 -4 -24 -12 11702.8 1252.21 5
 -4 -24 -13 5793.13 957.332 5
 -4 24 -13 5555.07 1007.75 6
 4 24 -13 5047.94 1003.67 6
 -4 -24 -14 868.784 486.816 5
 4 24 -14 904.025 511.14 6
 4 24 -15 23.4529 479.72 6
 -4 -24 -15 547.903 451.444 5
 4 24 -16 -244.599 387.981 6
 -4 -24 -16 -951.023 535.129 5
 4 -24 -17 1669.58 465.01 5
 4 24 -17 899.607 489.301 6
 -4 -24 -17 648.597 363.709 5
 -4 -24 -18 2578.1 485.913 5
 4 26 0 268576 5541.33 4
 -4 26 0 277561 5286.85 4
 -4 26 -1 10401.5 1141.93 4
 4 26 -1 11337 1198.05 4
 -4 26 1 12728.8 1250.55 4
 -4 26 -2 78185.6 2909.25 4
 4 26 -2 79478.6 2831.72 6
 4 26 -2 75454.2 2822.28 4
 -4 26 2 80792 3017.65 4
 -4 26 -3 14366.5 1323.29 4
 4 26 -3 14292.2 1271.84 4
 -4 26 3 12402.1 1319.36 4
 -4 26 -3 13721.5 1182.27 6
 4 26 -3 14667.7 1309.54 6
 4 26 -3 15232.8 1696.75 7
 4 26 -4 2861.02 684.194 4
 4 26 -4 2556.24 670.444 6
 -4 26 -4 2115.57 580.534 6
 -4 26 -4 2616.16 717.916 4
 4 26 -4 3561.99 1102.08 7
 4 26 -5 6086.61 1602.56 7
 4 26 -5 4197.32 817.755 6
 -4 26 -5 5287.19 1052.11 4
 -4 26 -5 4242.53 825.656 6
 -4 26 -6 677.274 590.01 4
 4 26 -6 833.365 527.746 6
 -4 26 -6 1158.02 534.041 6
 4 26 -7 2977.99 803.298 6
 -4 26 -7 2886.1 814.73 6
 -4 -26 -7 2666.95 538.331 5
 -4 26 -8 13043 1403.05 6
 -4 -26 -8 13272.3 1128.69 5
 4 26 -8 14287.9 1526.93 6
 -4 26 -9 102032 3862.35 6
 -4 -26 -9 99083.1 3025.95 5
 4 26 -9 102799 3963.33 6
 -4 -26 -10 4206.72 871.376 5
 -4 26 -10 3853.3 990.305 6
 4 26 -10 4148.96 1010.01 6
 -4 26 -11 94794.1 3847.68 6
 4 26 -11 86532.5 3694.03 6
 -4 -26 -11 88838.5 3076.05 5
 -4 26 -12 2350.65 791.999 6
 -4 -26 -12 1836.5 638.202 5
 4 26 -12 2693.26 847.877 6
 4 26 -13 34788 2291.38 6
 -4 -26 -13 35499.1 1967.84 5
 4 26 -14 3013.66 744.386 6
 -4 -26 -14 3459.17 779.045 5
 4 26 -15 1600.03 521.851 6
 4 -26 -15 1270.32 551.438 5
 -4 -26 -15 2183.27 665.876 5
 4 26 -16 302.178 368.855 6
 4 -26 -16 -263.364 387.252 5
 -4 -26 -16 -354.127 388.801 5
 4 -26 -17 630.606 310.889 5
 -4 -26 -17 1247.17 389.598 5
 4 26 -17 562.153 360.323 6
 -4 28 0 112946 3568.45 4
 4 28 0 110781 3669.67 4
 -4 28 -1 2845.62 707.619 4
 4 28 -1 2286.26 739.064 4
 -4 28 1 2604.3 735.365 4
 4 28 1 2570.49 821.772 4
 -4 28 -2 41460 2233.76 4
 4 28 -2 44694.6 2186.42 6
 -4 28 2 39585.1 2232.59 4
 4 28 -2 42638.6 2812.48 7
 4 28 -2 40212.6 2205.8 4
 4 28 -3 723.256 450.952 4
 4 28 -3 -185.56 977.092 7
 -4 28 3 1178.53 618.638 4
 4 28 -3 434.429 406.686 6
 -4 28 -3 1630.33 703.883 4
 -4 28 -4 1744.06 618.54 6
 4 28 -4 1670.34 673.48 6
 -4 28 4 1131.09 650.216 4
 4 28 -4 1329.79 596.747 4
 -4 28 -4 1818.31 684.498 4
 4 28 -4 196.137 732.391 7
 -4 28 -5 23.3052 607.198 4
 4 28 -5 -163.84 424.083 6
 -4 28 -5 146.265 412.997 6
 -4 28 -6 1577.29 658.104 6
 4 28 -6 1631.04 633.495 6
 -4 28 -6 1567.71 759.95 4
 -4 28 -7 5750.76 1023.76 6
 4 28 -7 5992.55 977.955 6
 4 28 -8 2853.3 863.287 6
 -4 28 -8 3234.1 889.489 6
 -4 28 -9 48657.7 2735.83 6
 4 28 -9 47476.9 2719.69 6
 -4 -28 -9 44069.6 2010.2 5
 -4 -28 -10 2827.45 691.729 5
 4 28 -10 2203.06 880.362 6
 -4 28 -10 2469.66 851.403 6
 -4 28 -11 71503.1 3427.46 6
 4 28 -11 75856.1 3439.5 6
 -4 -28 -11 72984.6 2752.6 5
 4 28 -12 3669.26 946.414 6
 -4 -28 -12 4166.8 800.212 5
 4 28 -13 3538.89 841.223 6
 -4 -28 -13 4525.55 797.255 5
 4 28 -14 1440.83 551.385 6
 -4 -28 -14 2118.42 589.825 5
 4 28 -15 804.825 487.613 6
 -4 -28 -15 682.278 431.31 5
 4 28 -16 1194.64 437.017 6
 -4 -28 -16 138.298 359.748 5
 4 28 -17 -219.064 361.507 6
 -4 30 0 41725.1 2289.31 4
 4 30 0 38842.4 2287.92 4
 -4 30 -1 955.52 613.906 4
 4 30 -1 879.213 567.741 4
 -4 30 1 1522.27 632.038 4
 4 30 1 874.366 620.28 4
 4 30 2 8454.52 1190.51 4
 -4 30 -2 9579.88 1218.75 4
 4 30 -2 6951.71 1257.99 7
 4 30 -2 9765.87 1159.33 4
 -4 30 2 9394.51 1184.44 4
 4 30 -3 170.225 374.087 6
 -4 30 -3 679.347 592.61 4
 -4 30 3 1328.83 584.858 4
 4 30 -3 672.997 517.255 4
 4 30 -3 641.635 630.282 7
 -4 30 -4 4195.98 904.471 4
 4 30 -4 2701.73 647.741 6
 4 30 -4 3351.76 815.148 4
 -4 30 4 2863.44 803.994 4
 4 30 -4 810.613 664.511 7
 -4 30 -5 1302.31 552.514 6
 -4 30 -5 2386.53 1015.52 4
 -4 30 5 1516.13 774.881 4
 4 30 -5 190.55 514.51 6
 -4 30 -6 2404.88 878.113 4
 -4 30 -6 2220.86 672.011 6
 4 30 -6 1762.35 607.064 6
 -4 30 6 3432.7 956.656 4
 -4 30 -7 10114.2 1276.03 6
 4 30 -7 10368.6 1315.65 6
 -4 30 -8 4628.22 920.39 6
 4 30 -8 4359.77 930.236 6
 4 30 -9 12380.6 1441.38 6
 -4 30 -9 12710.2 1509.64 6
 -4 30 -10 1045.16 659.367 6
 4 30 -10 1587.41 748.19 6
 4 30 -11 60663.3 3053.32 6
 4 30 -12 3466.41 869.726 6
 -4 -30 -12 4909.37 792.256 5
 4 30 -13 -73.4835 404.706 6
 -4 -30 -13 -810.602 574.864 5
 4 30 -14 4592.67 857.883 6
 -4 -30 -14 4707.43 731.514 5
 4 30 -15 5175.81 813.02 6
 -4 30 15 2870.29 680.06 4
 -4 -30 -15 4853.22 697.814 5
 4 30 -16 3825.37 631.379 6
 -4 32 0 232.943 583.032 4
 4 32 0 1112.04 555.332 4
 -4 32 -1 1567.68 663.191 4
 4 32 -1 2310.04 743.8 4
 -4 32 1 1228.46 669.665 4
 4 32 1 294.593 658.244 4
 -4 32 -2 16491.4 1569.58 4
 4 32 -2 15596.1 1534.46 4
 -4 32 2 15407.9 1514.34 4
 4 32 -2 10889.5 1524.42 7
 4 32 2 9008.02 1190.71 4
 4 32 -3 1277.42 624.021 6
 4 32 -3 666.007 659.623 4
 -4 32 -3 759.109 646.255 4
 -4 32 3 478.632 576.681 4
 4 32 3 -180.46 556.193 4
 -4 32 4 2920.46 816.237 4
 4 32 -4 3637.52 829.787 4
 -4 32 -4 3884.88 980.111 4
 4 32 -4 2682.68 659.368 6
 -4 32 5 11048.6 1459.81 4
 4 32 -5 8717.88 1124.01 6
 -4 32 -5 11279.5 1581.95 4
 -4 32 6 35322.1 2477.31 4
 4 32 -6 38374.1 2374.76 6
 -4 32 7 66354.5 3477.64 4
 4 32 -7 68235.5 3211.85 6
 4 32 -8 2358.38 764.98 6
 -4 32 8 880.058 628.129 4
 4 32 -9 962.442 525.737 6
 4 32 -10 753.659 554.728 6
 4 32 -11 9492.41 1245.77 6
 4 32 -12 657.635 502.919 6
 4 32 -13 1868.1 587.011 6
 -4 32 13 2671.41 790.075 4
 -4 32 14 4809.92 858.822 4
 4 32 -14 5827.74 921.119 6
 -4 32 15 25850.1 1590.98 4
 4 32 -15 29208.9 1698.97 6
 -4 34 0 2500.28 805.228 4
 4 34 0 2664.1 918.499 4
 -4 34 -1 9079.73 1279.9 4
 4 34 1 7328.07 1115.23 4
 4 34 -1 5509.32 1176.33 7
 -4 34 1 10510.1 1375.71 4
 4 34 -1 8664.8 1234.34 4
 -4 34 -2 9765.21 1348.8 4
 -4 34 2 8808.79 1219.56 4
 4 34 2 7290.51 1202.55 4
 4 34 -2 11380.3 1401.82 4
 4 34 -2 8982.2 1522.87 7
 -4 34 3 2847.42 770.341 4
 4 34 3 3374.17 1003.1 4
 -4 34 -3 3330.51 921.998 4
 4 34 -3 4184.82 913.84 4
 4 34 -4 12790 1273.75 6
 -4 34 4 12375.3 1485.19 4
 4 34 4 12270.6 1565.85 4
 -4 34 -4 13590.2 1591.04 4
 4 34 -4 13009.5 1429.41 4
 -4 34 5 50432.1 2837.67 4
 -4 34 -5 54461.7 3059.06 4
 -4 34 6 54662.3 3010.41 4
 4 34 -6 40847.5 2395.43 6
 4 34 -7 39147.5 2419.37 6
 -4 34 7 42906.6 2725.41 4
 -4 34 8 4774.9 1147.89 4
 4 34 -8 5152.31 963.489 6
 -4 34 9 225.089 629.619 4
 4 34 -9 462.013 586.832 6
 4 34 -10 288.039 456.343 6
 -4 34 10 1222.55 691.412 4
 -4 34 11 1635.18 746.21 4
 4 34 -11 1272.49 584.5 6
 4 34 -12 -59.8779 380.053 6
 -4 34 12 923.789 664.157 4
 4 34 -13 13381.1 1280.83 6
 -4 34 13 14204.7 1389.07 4
 4 34 -14 6348.06 862.07 6
 -4 34 14 3055.07 613.136 4
 4 34 -15 24621 1491.71 6
 -4 36 0 36215.6 2313.48 4
 4 36 0 37225.2 2353.53 4
 4 36 -1 3684.38 1081.59 7
 4 36 -1 4417.83 1026.98 4
 4 36 1 3791.95 846.849 4
 -4 36 -1 4481.14 1052.6 4
 -4 36 1 4049.8 906.728 4
 -4 36 -2 389.45 602.59 4
 4 36 2 918.68 597.874 4
 4 36 -2 1646.66 707.774 4
 -4 36 2 1507.11 729.582 4
 -4 36 3 2975.33 899.221 4
 -4 36 -3 985.688 622.703 4
 4 36 -3 1231.24 541.071 4
 4 36 3 1615.5 895.442 4
 -4 36 4 50528.1 2781.09 4
 4 36 4 48778.7 2917.49 4
 -4 36 -4 50132.2 2884.25 4
 4 36 -5 55763.2 2713.87 6
 4 36 5 47699.1 2971.71 4
 -4 36 -5 52466.5 3035.22 4
 -4 36 5 50563.6 2825.43 4
 4 36 -6 21564 1723.68 6
 -4 36 6 21973.9 1924.54 4
 4 36 6 18392.2 2002.96 4
 -4 36 7 36301.6 2439.97 4
 4 36 -7 37045.3 2314.72 6
 4 36 -8 2226.24 681.607 6
 -4 36 8 992.368 778.267 4
 -4 36 9 1070.25 653.872 4
 4 36 -9 1003.33 591.761 6
 -4 36 10 86.7124 519.445 4
 4 36 -10 732.527 519.369 6
 4 36 -11 -184.985 403.207 6
 -4 36 11 -940.177 605.13 4
 4 36 -12 735.479 437.748 6
 -4 36 12 -80.4658 489.509 4
 4 36 -13 6828.84 895.472 6
 -4 36 13 7014.03 903.274 4
 4 36 -14 7265.43 880.402 6
 -4 38 0 41859.4 2601.31 4
 4 38 0 42214.5 2514.57 4
 4 38 0 41910.5 2955.01 7
 4 38 1 914.804 631.512 4
 4 38 -1 481.338 697.326 4
 -4 38 1 345.242 550.728 4
 -4 38 -1 28.5223 575.097 4
 4 38 -2 564.891 528.627 4
 -4 38 2 769.808 661.298 4
 4 38 2 417.624 525.569 4
 -4 38 -2 981.287 614.764 4
 -4 38 3 14431.1 1580.61 4
 4 38 3 11589.6 1441.25 4
 -4 38 -3 13369 1570.76 4
 -4 38 4 38457.8 2453.73 4
 4 38 4 34332.7 2396.48 4
 -4 38 -4 38395.7 2538.29 4
 -4 38 5 4397.87 933.259 4
 4 38 5 3426 957.297 4
 -4 38 6 4447.56 976.21 4
 4 38 -6 3781.23 739.234 6
 4 38 6 4508 1057.97 4
 4 38 -7 3657.75 774.725 6
 -4 38 7 4715.55 944.559 4
 4 38 7 3395.95 909.092 4
 4 38 -8 724.183 532.1 6
 4 38 8 1474.25 782.931 4
 -4 38 8 279.304 531.429 4
 4 38 -9 4951.78 859.791 6
 -4 38 9 6262.63 1026.53 4
 4 38 9 3342.95 938.249 4
 4 38 -10 1894.82 598.323 6
 4 38 10 1561.21 773.663 4
 -4 38 10 1554.79 707.448 4
 4 38 -11 1254.04 526.573 6
 -4 38 11 1134.95 529.377 4
 4 38 11 1099.1 656.347 4
 4 38 -12 259.761 324.767 6
 4 38 12 537.722 633.148 4
 -4 38 12 136.723 401.666 4
 4 38 -13 2693 577.043 6
 4 38 13 2737.43 703.949 4
 -4 40 0 113088 4093.29 4
 4 40 0 116182 4147.05 4
 -4 40 -1 4533.92 917.683 4
 4 40 -1 5526.17 984.285 4
 4 40 1 5608.03 1186.87 7
 4 40 1 4749.5 929.633 4
 -4 40 1 4472.32 945.33 4
 -4 40 -2 91.7128 580.61 4
 4 40 -2 -243.185 475.186 4
 -4 40 2 -361.929 599.906 4
 4 40 2 89.9192 499.374 4
 4 40 2 -1086.89 871.379 7
 -4 40 -3 2835.63 812.725 4
 -4 40 3 2325.18 775.477 4
 4 40 3 3758.81 872.233 4
 -4 40 4 4435.5 980.046 4
 -4 40 -4 4131.49 989.748 4
 4 40 4 4800.39 1010.7 4
 -4 40 5 5014.66 980.851 4
 4 40 5 2228.91 772.581 4
 -4 40 6 13.0536 608.483 4
 4 40 6 630.295 585.123 4
 4 40 -7 1286.63 447.485 6
 -4 40 7 2137.4 767.445 4
 4 40 7 1755.37 728.047 4
 4 40 8 2156.54 843.981 4
 4 40 -8 3173.14 639.6 6
 -4 40 8 3902.18 832.442 4
 -4 40 9 22356.6 1717.18 4
 4 40 9 23862.4 1941.37 4
 4 40 -9 21398.8 1568.79 6
 4 40 10 -36.592 501.926 4
 4 40 -10 591.834 396.277 6
 -4 40 10 918.485 449.536 4
 4 40 -11 14552.2 1206.68 6
 -4 40 11 16741.3 1320.78 4
 4 40 11 16117.8 1522.6 4
 4 40 12 -107.887 398.118 4
 -4 42 0 89214.1 3599.77 4
 4 42 0 96385.9 3727.21 4
 4 42 -1 3833.34 858.659 4
 4 42 1 4042.16 883.957 4
 -4 42 1 4504.74 902.201 4
 -4 42 -1 4404.12 967.835 4
 4 42 2 31877.1 2236.89 4
 4 42 2 30715.8 2489.37 7
 -4 42 -2 32284.7 2184.7 4
 -4 42 2 33217.2 2195.12 4
 -4 42 -3 1501.98 582.554 4
 -4 42 3 3293.01 835.409 4
 4 42 3 3040.03 893.148 4
 4 42 3 3966.9 1135.21 7
 -4 42 4 484.496 576.645 4
 4 42 4 513.612 619.272 4
 -4 42 5 2265.69 792.055 4
 4 42 5 1756.46 631.786 4
 -4 42 6 -59.1076 523.232 4
 4 42 6 450.828 478.471 4
 -4 42 7 17904.5 1551.05 4
 4 42 7 15095 1490.86 4
 4 42 -8 5681.3 790.642 6
 -4 42 8 5193.41 870.393 4
 4 42 8 6925.02 1113.11 4
 4 42 -9 41062.1 2014.98 6
 -4 42 9 45696.7 2244.97 4
 4 42 9 46447.5 2439.21 4
 -4 42 10 713.307 401.041 4
 4 42 10 1362.28 507.715 4
 -4 44 0 67239.3 2985.03 4
 4 44 0 69492.3 3063.11 4
 -4 44 -1 1754.33 762.323 4
 4 44 1 1150.94 674.833 4
 -4 44 1 1241.33 652.5 4
 -4 44 2 23558.7 1781.28 4
 4 44 2 25639.4 1850.13 4
 -4 44 -2 23278.5 1836.55 4
 -4 44 3 1041.31 527.774 4
 4 44 3 791.174 547.514 4
 4 44 4 777.179 579.053 7
 -4 44 4 -647.187 526.887 4
 4 44 4 -245.844 505.806 4
 4 44 5 -269.84 686.625 7
 -4 44 5 260.925 484.022 4
 4 44 5 -301.055 461.922 4
 -4 44 6 1710.55 589.945 4
 4 44 6 1044.85 611.236 4
 4 44 7 6320.13 1020.39 4
 -4 44 7 5741.39 827.829 4
 4 44 8 4664.85 849.655 4
 -4 44 8 6056.15 878.184 4
 -4 44 9 53046.7 2212.83 4
 4 44 9 55627 2442.41 4
 -4 46 0 42846.9 2292.44 4
 -4 46 -1 1884.98 660.856 4
 -4 46 1 2192.54 675.457 4
 -4 46 2 11003.7 1210.77 4
 4 46 2 9543.73 1120.17 4
 4 46 3 350.8 390.333 4
 -4 46 3 14.4224 415.09 4
 4 46 4 -1062.67 605.178 4
 -4 46 4 1456.13 655.314 4
 4 46 5 -383.104 456.483 4
 -4 46 5 672.256 520.86 4
 4 46 6 622.577 410.891 4
 -4 46 6 -108.905 342.806 4
 -4 46 7 -52.826 349.604 4
 -4 48 0 3315.25 693.574 4
 -4 48 1 465.155 435.932 4
 -4 48 2 362.103 463.335 4
 -4 48 3 16.0875 336.232 4
 -4 48 4 8670.8 936.428 4
 5 1 0 3565.89 424.798 1
 5 1 1 266724 2943.28 1
 5 -1 1 257916 2861.54 1
 5 -1 2 50888.8 1355.59 1
 5 1 2 48754.4 1348.17 1
 -5 1 -3 647100 4506.98 1
 5 1 3 654205 5422.85 1
 -5 1 -4 150449 2366.46 1
 5 1 4 152649 2960.95 1
 -5 -1 -4 153102 2474.72 1
 5 -1 4 154784 2924.09 1
 -5 1 -5 60469.8 1643.73 1
 -5 -1 -5 66146.7 1768.27 1
 5 1 5 64355 2147.47 1
 -5 -1 -6 31088.5 1332.06 1
 5 -1 6 29600.1 1668.06 1
 -5 1 -6 31802.8 1290.71 1
 5 1 6 30712.3 1701.68 1
 -5 1 -7 14125.1 960.033 1
 -5 -1 -7 13288.9 952.53 1
 5 1 7 14991.7 1364.38 1
 5 -1 7 14429.5 1321.94 1
 -5 1 -8 8704.21 782.533 3
 5 -1 8 9517.81 1223.24 1
 -5 -1 -8 9077.92 845.045 1
 -5 -1 -8 8273.83 785.72 3
 -5 1 -8 10065.2 883.331 1
 -5 1 -9 1319.03 357.648 3
 -5 -1 -9 1381 414.215 3
 -5 1 -10 3562.61 651.335 3
 -5 -1 -10 2830.97 544.298 3
 -5 1 -11 415.586 432.399 3
 -5 -1 -11 52.7812 340.73 3
 -5 -1 -12 2346.78 654.054 3
 -5 1 -12 2548.07 691.666 3
 -5 -1 -13 2186.11 636.871 5
 -5 1 -13 1955.78 621.282 5
 5 1 -14 42627.6 2448.75 3
 5 -1 -14 44213.7 2550.02 3
 -5 -1 -14 46386.2 2336.57 5
 -5 1 -14 44749.4 2264.24 5
 -5 1 -15 43527.9 2256.19 5
 -5 -1 -15 41664.4 2234.53 5
 5 1 -15 39562.9 2418.56 3
 5 -1 -15 40580.8 2484.63 3
 5 1 -16 34863.2 2350.4 3
 5 -1 -16 36333.9 2393 3
 -5 1 -16 35498.6 2003.99 5
 -5 -1 -16 38297.9 2168.03 5
 -5 -1 -17 24131.5 1657.01 5
 5 -1 -17 24003.1 1902.72 3
 -5 1 -17 24573.7 1627.53 5
 5 1 -17 21637.5 1841.91 3
 -5 -1 -18 3987.03 744.306 5
 5 -1 -18 2240.15 669.451 3
 -5 1 -18 3175.4 670.672 5
 5 1 -18 2424.74 739.27 3
 5 1 -19 525.265 418.424 3
 -5 1 -19 421.433 378.081 5
 -5 -1 -19 915.21 477.396 5
 5 -1 -19 1123.82 494.231 3
 -5 -1 -20 187.1 319.208 5
 5 1 -20 197.603 310.728 3
 5 -1 -20 333.464 367.622 3
 5 3 0 34935.4 1102.69 1
 5 3 1 -25.6667 276.561 1
 5 -3 1 1.12783 247.725 1
 5 -3 2 17249.3 812.706 1
 5 3 2 19457.4 916.716 1
 -5 3 -3 13705.3 674.658 1
 5 -3 3 13262.3 768.59 1
 5 3 3 13356 821.759 1
 -5 3 -4 69999.5 1570.31 1
 -5 -3 -4 70043.4 1726.2 1
 5 3 4 68251.6 2037.82 1
 5 -3 5 139664 3079.32 1
 -5 3 -5 136934 2377.56 1
 5 3 5 134730 3195.74 1
 -5 -3 -5 132469 2588.5 1
 -5 -3 -6 85144.4 2236.8 1
 -5 3 -6 85079.8 2021.41 1
 5 -3 6 78988.4 2629.2 1
 5 3 6 83916.3 2808.75 1
 -5 3 -7 11773.2 857.503 1
 5 3 7 10096.4 1152.96 1
 -5 -3 -7 11046.2 916.321 1
 5 -3 7 11182.9 1159.23 1
 -5 3 -8 1306.43 368.937 1
 5 -3 8 2154.55 722.1 1
 -5 3 -8 1332.93 389.536 3
 -5 -3 -9 5527.54 714.772 3
 -5 3 -9 6074.77 710.089 3
 -5 3 -10 34578.5 1708.24 3
 -5 -3 -10 34186.3 1673.75 3
 -5 3 -11 375.2 373.817 3
 -5 -3 -11 1000.6 519.353 3
 -5 3 -12 2553.52 628.333 5
 -5 -3 -12 3375.13 672.544 3
 -5 3 -13 -1336.42 671.646 5
 -5 -3 -13 -380.244 572.425 5
 5 3 -14 12288.7 1438.88 3
 -5 3 -14 10154.4 1104.45 5
 -5 -3 -14 13314.7 1390.25 5
 5 3 -15 6835.11 1134.71 3
 -5 -3 -15 7724.67 1105.52 5
 -5 3 -15 6564.75 895.312 5
 5 -3 -15 7127.51 1207.93 3
 -5 3 -16 34207.4 1920.95 5
 5 -3 -16 35007.1 2329.4 3
 5 3 -16 32005.2 2242.47 3
 -5 -3 -16 37289.7 2156.01 5
 -5 -3 -17 33663.3 2012.07 5
 5 3 -17 34425.5 2216.9 3
 5 -3 -17 36108.1 2357.52 3
 -5 3 -17 34302.5 1863.8 5
 -5 3 -18 499.69 341.858 5
 5 -3 -18 448.691 449.407 3
 -5 -3 -18 1404.92 620.29 5
 5 3 -18 263.598 512.674 3
 5 -3 -19 7549.76 1007.1 3
 5 3 -19 7736.48 982.679 3
 -5 -3 -19 6411.08 771.01 5
 5 3 -20 611.755 432.669 3
 5 -3 -20 494.831 416.95 3
 -5 -3 -20 332.719 308.328 5
 5 5 0 17778.6 766.949 1
 5 5 -1 54409.8 1308.14 1
 5 5 1 56243.4 1434.63 1
 5 -5 2 3624.63 402.999 1
 5 5 2 2772.99 368.92 1
 5 -5 3 53072.9 1493.96 1
 5 5 3 52404.3 1684.88 1
 -5 5 -4 13986.3 708.015 1
 5 5 4 13246.7 966.785 1
 -5 -5 -4 13240.6 812.299 1
 5 -5 4 13871.4 882.892 1
 -5 -5 -5 15116.8 926.353 1
 5 -5 5 16777.3 1075.63 1
 -5 5 -5 15819.7 795.172 1
 5 5 5 14311.6 1123.74 1
 -5 5 -6 27072.2 1102.92 1
 5 5 6 25562.8 1607.46 1
 5 -5 6 28971.7 1587.28 1
 -5 -5 -6 27723.4 1341.63 1
 -5 -5 -7 1532.73 397.928 1
 5 5 7 1367.65 596.993 1
 5 -5 7 1178.8 510.441 1
 5 -5 8 101154 3685.66 1
 -5 5 -8 91427.9 2366.18 1
 -5 5 -9 498.404 317.929 6
 -5 -5 -9 486.074 355.569 3
 -5 5 -10 114713 3010.82 6
 -5 -5 -10 113968 2997.88 3
 -5 -5 -11 3108.66 655.805 3
 -5 5 -11 3429.47 689.557 5
 -5 -5 -12 4656.47 770.946 3
 -5 5 -12 2251.67 450.458 5
 5 5 -13 -7.09566 536.349 3
 -5 5 -13 823.343 468.379 5
 -5 -5 -13 1390.2 701.426 5
 5 5 -14 1398.31 708.933 3
 -5 -5 -14 1538.09 834.593 5
 -5 5 -14 1897.98 586.507 5
 5 5 -15 21393.6 1751.52 3
 -5 -5 -15 20981.3 1682.67 5
 5 -5 -15 20965.8 1887.38 3
 5 5 -16 28060.5 2031.69 3
 -5 5 -16 28384.5 1713.57 5
 5 -5 -16 25951.6 2031.17 3
 -5 -5 -16 28107.1 1923.45 5
 5 -5 -17 5247.1 971.49 3
 -5 -5 -17 5837.89 971.658 5
 -5 5 -17 5925.03 787.212 5
 5 5 -17 5459.73 944.099 3
 5 5 -18 3422.19 744.236 3
 5 -5 -18 5262.14 904.331 3
 -5 -5 -18 4262.5 781.952 5
 5 5 -19 28269.5 1783.09 3
 5 -5 -19 27637.6 1810.23 3
 -5 -5 -19 28991.7 1648.51 5
 5 5 -20 1916.66 483.164 3
 5 -5 -20 1379.63 463.36 3
 -5 -5 -20 1230.74 366.206 5
 5 7 0 1706.82 285.248 1
 -5 -7 -1 78163.4 1601.43 1
 5 7 -1 74603.5 1549.84 1
 5 -7 1 73097.2 1598.34 1
 5 7 1 76187.3 1744.78 1
 -5 -7 -2 3576.49 417.239 1
 5 7 2 3940.87 511.278 1
 5 -7 2 3600.18 421.45 1
 5 -7 3 3413.87 433.217 1
 5 7 3 2950.1 475.311 1
 -5 -7 -3 3172.29 453.661 1
 -5 -7 -4 25918.5 1138.63 1
 5 7 4 25109.3 1340.22 1
 5 -7 4 28358.1 1225.98 1
 -5 7 -5 14532.1 749.8 1
 5 -7 5 15712.1 1039.71 1
 -5 -7 -5 13599.4 953.955 1
 5 7 5 13913.2 1121.85 1
 -5 7 -6 12952.3 769.084 1
 -5 -7 -6 13146.9 969.461 1
 5 -7 6 15182.7 1125.47 1
 5 7 6 13068.4 1213.78 1
 -5 -7 -7 4808.58 667.95 1
 -5 7 -7 4588.93 510.867 1
 5 -7 7 5275.11 798.212 1
 -5 7 -8 21611.4 1124.81 1
 5 -7 8 24717.4 1783.09 1
 -5 7 -9 16526.1 1072.36 1
 5 7 -9 14731.1 1401.46 1
 -5 -7 -9 16940.1 1104.69 3
 -5 7 -9 14551 1164.48 6
 -5 7 -10 257079 4667.3 6
 -5 -7 -10 251289 4347.68 3
 -5 7 -10 252569 4141.44 5
 -5 7 -11 1591.05 516.569 6
 -5 7 -11 1848.12 571.197 5
 -5 -7 -11 1656.71 528.467 3
 -5 -7 -12 123803 3399.97 3
 -5 7 -12 84548.3 2665.37 5
 5 7 -13 5317.48 944.314 3
 -5 7 -13 2504.84 523.13 5
 -5 -7 -13 4790.56 926.86 5
 5 7 -14 1146.73 588.52 3
 5 7 -14 463.781 455.141 6
 -5 7 -14 1330.98 546.864 5
 -5 -7 -14 199.636 702.57 5
 5 -7 -15 22598.3 1886.27 3
 5 7 -15 23415.9 1824.99 3
 -5 -7 -15 22795.3 1787.82 5
 -5 7 -15 20843 1385.11 5
 5 -7 -16 11301.5 1398.11 3
 -5 -7 -16 10303.5 1245.22 5
 5 7 -16 11406.7 1287.25 3
 -5 -7 -17 3085.09 750.586 5
 5 -7 -17 2541.15 757.483 3
 5 7 -17 1957.84 636.472 3
 -5 -7 -18 2079.88 615.69 5
 5 7 -18 2199.07 628.354 3
 5 -7 -18 1607.02 593.504 3
 5 7 -19 66563.5 2559.49 3
 5 -7 -19 62959.4 2675.72 3
 -5 -7 -19 67329.9 2470.11 5
 5 -7 -20 678.042 339.851 3
 -5 -7 -20 1765 431.16 5
 5 9 0 3722.21 440.322 1
 5 9 -1 262841 3008.02 1
 5 9 1 267139 3405.73 1
 -5 -9 -1 268973 3068.17 1
 5 -9 2 24232.4 967.146 1
 5 9 2 26712.5 1241.57 1
 -5 -9 -2 26147.7 1046.1 1
 5 9 -2 27014 961.779 1
 -5 -9 -3 62062.5 1704.46 1
 5 -9 3 65159.8 1637.01 1
 5 9 3 61524.5 1991.83 1
 5 9 4 3512.56 610.805 1
 5 -9 4 4520.6 492.446 1
 -5 -9 -4 4153.06 523.713 1
 -5 -9 -5 1031.84 322.8 1
 5 -9 5 843.482 332.58 1
 5 9 5 1144.78 508.886 1
 5 -9 6 6129.82 738.626 1
 -5 -9 -6 7405.6 776.217 1
 -5 9 -6 6806.6 556.555 1
 5 9 6 5836.33 878.013 1
 -5 9 -7 15000.1 850.431 1
 -5 -9 -7 13890.6 974.309 5
 5 -9 7 15414.5 1284.91 1
 -5 9 -8 12376.9 824.902 1
 -5 9 -8 12318.1 990.288 6
 5 9 -8 13420.1 1293.36 1
 5 -9 8 14626.8 1355.2 1
 -5 9 -9 7225.25 841.678 6
 -5 -9 -9 6435.09 749.097 3
 -5 9 -10 260568 4912.14 6
 -5 -9 -10 252692 4320.38 3
 -5 9 -11 2671.73 691.119 6
 -5 -9 -11 2107.72 620.97 3
 -5 9 -12 116209 3577.39 6
 -5 -9 -12 106047 3394.71 5
 5 9 -12 112360 3618.01 3
 -5 -9 -12 109633 3184.24 3
 5 9 -13 1810.35 606.728 3
 -5 -9 -13 1263.25 749.423 5
 5 9 -13 1896.4 653.969 6
 5 9 -14 20052.9 1656.92 6
 5 9 -14 23445.9 1840.58 3
 -5 -9 -14 21911.9 1747.43 5
 5 9 -15 1862.29 633.164 3
 5 -9 -15 1936 774.174 3
 -5 -9 -15 1372.64 699.516 5
 5 9 -15 1370.78 424.791 6
 5 -9 -16 1061.23 660.945 3
 5 9 -16 859.539 639.837 3
 -5 -9 -16 -502.479 641.133 5
 5 -9 -17 80.052 510.81 3
 -5 -9 -17 915.245 506.97 5
 5 9 -17 1213.11 521 3
 -5 -9 -18 9988.92 1143.81 5
 5 9 -18 8131.84 990.926 3
 5 -9 -18 8974.89 1131.28 3
 5 9 -19 38907.1 1885.49 3
 5 -9 -19 40103.8 2047.86 3
 -5 -9 -19 39617.4 1898.83 5
 5 -9 -20 321.291 353.73 3
 -5 -9 -20 529.613 312.366 5
 5 11 0 1943.29 368.59 1
 -5 -11 -1 204488 2782.59 1
 5 11 1 202799 3183.86 1
 5 11 -1 203727 2753.7 1
 -5 -11 -2 9129.8 671.234 1
 5 -11 2 9088.83 604.918 1
 5 11 -2 10121.9 630.713 1
 5 11 2 9359.45 796.56 1
 5 11 -3 19030.4 830.339 1
 5 11 3 19336.1 1219.73 1
 5 -11 3 20977.7 907.795 1
 -5 -11 -3 20138.8 1023.9 1
 5 -11 4 -85.8956 253.482 1
 -5 -11 -4 214.282 228.235 1
 5 -11 5 4470.14 573.25 1
 5 11 5 5169.41 825.433 1
 -5 -11 -5 3796.24 535.78 1
 -5 -11 -6 150002 3339.51 1
 5 -11 6 155733 3331.02 1
 -5 11 -7 823.229 369.522 6
 -5 -11 -7 824.446 387.59 5
 5 -11 7 237.904 358.108 1
 -5 11 -8 29412.7 1621.51 6
 -5 -11 -8 29379.2 1496.16 5
 -5 11 -9 4756.32 749.841 6
 -5 -11 -9 4512.07 596.314 3
 -5 -11 -9 4883.12 716.034 5
 -5 -11 -10 228123 4548.06 5
 -5 -11 -10 227780 4077.72 3
 -5 11 -11 4320.06 768.183 6
 5 11 -11 4225.3 759.559 3
 -5 -11 -11 3258.88 597.929 3
 -5 -11 -11 4045.01 878.883 5
 5 11 -12 51626.2 2461.83 3
 -5 -11 -12 48161.2 2370.39 5
 -5 11 -12 50800.9 2490.8 6
 5 11 -13 2311.03 689.2 3
 -5 -11 -13 2062.83 776.368 5
 5 11 -13 3498.55 952.252 6
 5 11 -14 2277.01 599.367 3
 5 11 -14 1909.44 666.623 6
 -5 -11 -14 817.659 696.56 5
 5 -11 -15 4456.64 901.382 3
 -5 -11 -15 5830.59 1035.55 5
 5 11 -15 5175.87 909.675 3
 5 11 -15 3176.05 690.075 6
 5 -11 -16 2329.71 720.935 3
 5 11 -16 2546.5 662.396 6
 -5 -11 -16 2947.66 822.198 5
 5 11 -16 3509.66 746.732 3
 5 11 -17 1729.55 590.124 3
 5 -11 -17 899.565 501.854 3
 -5 -11 -17 1268.62 612.526 5
 5 -11 -18 765.252 459.657 3
 5 11 -18 511.912 334.297 3
 -5 -11 -18 1031.75 502.82 5
 -5 -11 -19 32578.6 1717 5
 5 -11 -19 32735.9 1772.04 3
 5 -11 -20 8176.81 879.238 3
[truncated: 335,069 more chars]
