# Supplementary material
Source: publisher figshare collection journal article supplement (https://acs.figshare.com/ndownloader/files/16775912)
Supplement: Supplementary file 1 [file 16775912 › LIFM-114-Acetone.cif]

data_LIFM-114-Acetone
_audit_creation_date              2017-12-07
_audit_creation_method
;
Olex2 1.2
(compiled 2017.08.10 svn.r3458 for OlexSys, GUI svn.r5381)
;
_shelx_SHELXL_version_number      '2014/7'
_publ_contact_author_address      ?
_publ_contact_author_email        ?
_publ_contact_author_id_orcid     ?
_publ_contact_author_name         ''
_publ_contact_author_phone        ?
_publ_section_references
;
Dolomanov, O.V., Bourhis, L.J., Gildea, R.J, Howard, J.A.K. & Puschmann, H.
 (2009), J. Appl. Cryst. 42, 339-341.

Sheldrick, G.M. (2015). Acta Cryst. C71, 3-8.
;
_chemical_name_common             LIFM-114-Acetone
_chemical_name_systematic         ?
_chemical_formula_moiety
'C108 H64 O32 Zr6 +[solvent]'
_chemical_formula_sum             'C108 H64 O32 Zr6'
_chemical_formula_weight          2420.91
_chemical_melting_point           ?
loop_
  _atom_type_symbol
  _atom_type_description
  _atom_type_scat_dispersion_real
  _atom_type_scat_dispersion_imag
  _atom_type_scat_source
 'C' 'C' 0.0181 0.0091 'International Tables Vol C Tables 4.2.6.8 and 6.1.1.4'
 'H' 'H' 0.0000 0.0000 'International Tables Vol C Tables 4.2.6.8 and 6.1.1.4'
 'O' 'O' 0.0492 0.0322 'International Tables Vol C Tables 4.2.6.8 and 6.1.1.4'
 'Zr' 'Zr' -0.1862 2.2449
 'International Tables Vol C Tables 4.2.6.8 and 6.1.1.4'

_shelx_space_group_comment
;
The symmetry employed for this shelxl refinement is uniquely defined
by the following loop, which should always be used as a source of
symmetry information in preference to the above space-group names.
They are only intended as comments.
;
_space_group_crystal_system       'orthorhombic'
_space_group_IT_number            65
_space_group_name_H-M_alt         'C m m m'
_space_group_name_Hall            '-C 2 2'
loop_
  _space_group_symop_operation_xyz
 'x, y, z'
 '-x, -y, z'
 'x, -y, -z'
 '-x, y, -z'
 'x+1/2, y+1/2, z'
 '-x+1/2, -y+1/2, z'
 'x+1/2, -y+1/2, -z'
 '-x+1/2, y+1/2, -z'
 '-x, -y, -z'
 'x, y, -z'
 '-x, y, z'
 'x, -y, z'
 '-x+1/2, -y+1/2, -z'
 'x+1/2, y+1/2, -z'
 '-x+1/2, y+1/2, z'
 'x+1/2, -y+1/2, z'

_cell_length_a                    21.1937(18)
_cell_length_b                    42.4945(15)
_cell_length_c                    17.8951(6)
_cell_angle_alpha                 90
_cell_angle_beta                  90
_cell_angle_gamma                 90
_cell_volume                      16116.6(16)
_cell_formula_units_Z             4
_cell_measurement_reflns_used     6086
_cell_measurement_temperature     150(2)
_cell_measurement_theta_max       63.5270
_cell_measurement_theta_min       3.7380
_shelx_estimated_absorpt_T_max    ?
_shelx_estimated_absorpt_T_min    ?
_exptl_absorpt_coefficient_mu     3.506
_exptl_absorpt_correction_T_max   1.00000
_exptl_absorpt_correction_T_min   0.59863
_exptl_absorpt_correction_type    multi-scan
_exptl_absorpt_process_details
;
CrysAlisPro 1.171.38.43 (Rigaku Oxford Diffraction, 2015)
Empirical absorption correction using spherical harmonics,
 implemented in SCALE3 ABSPACK scaling algorithm.
;
_exptl_absorpt_special_details    ?
_exptl_crystal_colour             Colourless
_exptl_crystal_density_diffrn     0.998
_exptl_crystal_density_meas       ?
_exptl_crystal_density_method     ?
_exptl_crystal_description        Rod
_exptl_crystal_F_000              4832
_exptl_crystal_size_max           0.3
_exptl_crystal_size_mid           0.1
_exptl_crystal_size_min           0.1
_exptl_transmission_factor_max    ?
_exptl_transmission_factor_min    ?
_diffrn_reflns_av_R_equivalents   0.0469
_diffrn_reflns_av_unetI/netI      0.0421
_diffrn_reflns_Laue_measured_fraction_full 0.960
_diffrn_reflns_Laue_measured_fraction_max 0.960
_diffrn_reflns_limit_h_max        22
_diffrn_reflns_limit_h_min        -23
_diffrn_reflns_limit_k_max        41
_diffrn_reflns_limit_k_min        -48
_diffrn_reflns_limit_l_max        20
_diffrn_reflns_limit_l_min        -17
_diffrn_reflns_number             14974
_diffrn_reflns_point_group_measured_fraction_full 0.960
_diffrn_reflns_point_group_measured_fraction_max 0.960
_diffrn_reflns_theta_full         63.595
_diffrn_reflns_theta_max          63.595
_diffrn_reflns_theta_min          3.396
_diffrn_ambient_environment       N~2~
_diffrn_ambient_temperature       150(2)
_diffrn_detector                  'CCD plate'
_diffrn_detector_area_resol_mean  10.6525
_diffrn_detector_type             Atlas
_diffrn_measured_fraction_theta_full 0.960
_diffrn_measured_fraction_theta_max 0.960
_diffrn_measurement_details
;
List of Runs (angles in degrees, time in seconds):

  # Type    Start    End  Width  t~exp~   \w     \q     \k     \f   Frames
--------------------------------------------------------------------------
  1  \w    -69.00  28.00   1.00   20.00    --  -40.95  57.00-150.00   97
  2  \w     99.00 147.00   1.00   28.39    --   86.42 125.00-180.00   48
  3  \w    106.00 141.00   1.00   28.39    --   86.42 125.00 -60.00   35
  4  \w     66.00 121.00   1.00   28.39    --   86.42  45.00-120.00   55
  5  \w     68.00 131.00   1.00   28.39    --   86.42  61.00 150.00   63
;
_diffrn_measurement_device        'four-circle diffractometer'
_diffrn_measurement_device_type   'SuperNova, Dual, Cu at zero, Atlas'
_diffrn_measurement_method        '\w scans'
_diffrn_orient_matrix_type
'CrysAlisPro convention (1999,Acta A55,543-557)'
_diffrn_orient_matrix_UB_11       -0.0627712000
_diffrn_orient_matrix_UB_12       -0.0173787000
_diffrn_orient_matrix_UB_13       0.0134243000
_diffrn_orient_matrix_UB_21       0.0325332000
_diffrn_orient_matrix_UB_22       -0.0211600000
_diffrn_orient_matrix_UB_23       0.0582742000
_diffrn_orient_matrix_UB_31       -0.0170633000
_diffrn_orient_matrix_UB_32       0.0237570000
_diffrn_orient_matrix_UB_33       0.0618673000
_diffrn_radiation_monochromator   mirror
_diffrn_radiation_probe           x-ray
_diffrn_radiation_type            CuK\a
_diffrn_radiation_wavelength      1.54184
_diffrn_source                    'micro-focus sealed X-ray tube'
_diffrn_source_type               'SuperNova (Cu) X-ray Source'
_reflns_Friedel_coverage          0.000
_reflns_Friedel_fraction_full     .
_reflns_Friedel_fraction_max      .
_reflns_number_gt                 5644
_reflns_number_total              6892
_reflns_odcompleteness_completeness 98.65
_reflns_odcompleteness_iscentric  1
_reflns_odcompleteness_theta      59.94
_reflns_special_details
;
 Reflections were merged by SHELXL according to the crystal
 class for the calculation of statistics and refinement.
 
 Structure factors included contributions from the .fab file.
 
 _reflns_Friedel_fraction is defined as the number of unique
 Friedel pairs measured divided by the number that would be
 possible theoretically, ignoring centric projections and
 systematic absences.
;
_reflns_threshold_expression      'I > 2\s(I)'
_computing_cell_refinement        'CrysAlisPro 1.171.38.43 (Rigaku OD, 2015)'
_computing_data_collection        'CrysAlisPro 1.171.38.43 (Rigaku OD, 2015)'
_computing_data_reduction         'CrysAlisPro 1.171.38.43 (Rigaku OD, 2015)'
_computing_molecular_graphics     'Olex2 (Dolomanov et al., 2009)'
_computing_publication_material   'Olex2 (Dolomanov et al., 2009)'
_computing_structure_refinement   'ShelXL (Sheldrick, 2015)'
_computing_structure_solution     ?
_refine_diff_density_max          0.901
_refine_diff_density_min          -3.326
_refine_diff_density_rms          0.196
_refine_ls_extinction_coef        .
_refine_ls_extinction_method      none
_refine_ls_goodness_of_fit_ref    1.609
_refine_ls_hydrogen_treatment     constr
_refine_ls_matrix_type            full
_refine_ls_number_parameters      755
_refine_ls_number_reflns          6892
_refine_ls_number_restraints      921
_refine_ls_R_factor_all           0.1278
_refine_ls_R_factor_gt            0.1175
_refine_ls_restrained_S_all       1.545
_refine_ls_shift/su_max           0.001
_refine_ls_shift/su_mean          0.000
_refine_ls_structure_factor_coef  Fsqd
_refine_ls_weighting_details
'w=1/[\s^2^(Fo^2^)+(0.2000P)^2^] where P=(Fo^2^+2Fc^2^)/3'
_refine_ls_weighting_scheme       calc
_refine_ls_wR_factor_gt           0.3434
_refine_ls_wR_factor_ref          0.3607
_refine_special_details           ?
_olex2_refinement_description
;
1. Fixed Uiso
 At 1.2 times of:
  All C(H) groups
2. Restrained distances
 C8-C9A = C9A-C10A = C10A-C11
 1.39 with sigma of 0.01
 C11-C12A = C12A-C13A = C13A-C8
 1.39 with sigma of 0.01
 C8-C10A = C9A-C11 = C10A-C12A
 2.4 with sigma of 0.01
 C11-C13A = C12A-C8 = C13A-C9A
 2.4 with sigma of 0.01
 C9A-C12A = C10A-C13A
 2.8 with sigma of 0.01
 C15-C16 = C19-C22 = C25-C28
 1.49 with sigma of 0.02
 C15A-C16A = C19A-C22A = C25A-C28
 1.49 with sigma of 0.02
 C15B-C16B = C19B-C22B = C25B-C29
 1.49 with sigma of 0.02
 C15C-C16C = C19C-C22C = C25C-C29
 1.49 with sigma of 0.02
 Zr3-O10 = Zr3-O9 = Zr6-O10 = Zr5-O10
 2.13 with sigma of 0.02
 Zr5-O9 = Zr4-O9 = Zr6-O12 = Zr4-O11
 2.13 with sigma of 0.02
 Zr3-O11 = Zr3-O12
 2.09 with sigma of 0.02
 Zr3-O13 = Zr3-O14 = Zr5-O15 = Zr5-O16
 2.1 with sigma of 0.01
 O13-O14 = O15-O16
 3.15 with sigma of 0.02
 O16-O14
 3.059 with sigma of 0.02
 O11-O12 = O11A-O12A
 2.4 with sigma of 0.01
 O11-O11A = O12-O12A
 1.6 with sigma of 0.01
 Zr3-O11A = Zr3-O12A
 2.627 with sigma of 0.01
 C28-C29
 1.41 with sigma of 0.01
 C15-O3 = C15-O4 = C15A-O3A = C15A-O4A
 1.29 with sigma of 0.01
 C15B-O3B = C15B-O4B = C15C-O3C = C15C-O4C
 1.29 with sigma of 0.01
 Zr3-O3 = Zr4-O4 = Zr3_$3-O3A = Zr6_$4-O4A
 2.12 with sigma of 0.02
 Zr4_$5-O3B = Zr5_$5-O4B
 2.12 with sigma of 0.02
 Zr5_$6-O3C = Zr6_$7-O4C
 2.12 with sigma of 0.02
3. Restrained planarity
 C8, C9A, C10A, C11, C12A, C13A
 with sigma of 0.01
4. Rigid bond restraints
 Zr3, Zr4, Zr5, Zr6, O9, O10, O11, O12, O13, O14, O15, O16, O11A, O12A
 with sigma for 1-2 distances of 0.01 and sigma for 1-3 distances of 0.01
 O3, O4, C15, C16, C17, C18, C19, C20, C21, C22, C23, C24, C25, C26, C27, C28,
 C29
 with sigma for 1-2 distances of 0.01 and sigma for 1-3 distances of 0.01
 O3A, O4A, C15A, C16A, C17A, C18A, C19A, C20A, C21A, C22A, C23A, C24A, C25A,
 C26A, C27A
 with sigma for 1-2 distances of 0.01 and sigma for 1-3 distances of 0.01
 O3B, O4B, C15B, C16B, C17B, C18B, C19B, C20B, C21B, C22B, C23B, C24B, C25B,
 C26B, C27B
 with sigma for 1-2 distances of 0.01 and sigma for 1-3 distances of 0.01
 O3C, O4C, C15C, C16C, C17C, C18C, C19C, C20C, C21C, C22C, C23C, C24C, C25C,
 C26C, C27C
 with sigma for 1-2 distances of 0.01 and sigma for 1-3 distances of 0.01
 C8, C9, C10, C11, C12, C13, C9A, C10A, C12A, C13A
 with sigma for 1-2 distances of 0.01 and sigma for 1-3 distances of 0.01
 Zr1, Zr2, O5, O6
 with sigma for 1-2 distances of 0.003 and sigma for 1-3 distances of 0.003
5. Uiso/Uaniso restraints and constraints
Zr3 \\sim Zr4 \\sim Zr5 \\sim Zr6 \\sim O9 \\sim O10 \\sim O11 \\sim O12 \\sim
O13 \\sim O14 \\sim O15 \\sim O16 \\sim O11A \\sim O12A: within 2A with sigma
of 0.01 and sigma for terminal atoms of 0.02
O3 \\sim O4 \\sim C15 \\sim C16 \\sim C17 \\sim C18 \\sim C19 \\sim C20 \\sim
C21 \\sim C22 \\sim C23 \\sim C24 \\sim C25 \\sim C26 \\sim C27 \\sim C28 \\sim
C29: within 2A with sigma of 0.01 and sigma for terminal atoms of 0.02
O3A \\sim O4A \\sim C15A \\sim C16A \\sim C17A \\sim C18A \\sim C19A \\sim C20A
\\sim C21A \\sim C22A \\sim C23A \\sim C24A \\sim C25A \\sim C26A \\sim C27A:
within 2A with sigma of 0.01 and sigma for terminal atoms of 0.02
O3B \\sim O4B \\sim C15B \\sim C16B \\sim C17B \\sim C18B \\sim C19B \\sim C20B
\\sim C21B \\sim C22B \\sim C23B \\sim C24B \\sim C25B \\sim C26B \\sim C27B:
within 2A with sigma of 0.01 and sigma for terminal atoms of 0.02
O3C \\sim O4C \\sim C15C \\sim C16C \\sim C17C \\sim C18C \\sim C19C \\sim C20C
\\sim C21C \\sim C22C \\sim C23C \\sim C24C \\sim C25C \\sim C26C \\sim C27C:
within 2A with sigma of 0.01 and sigma for terminal atoms of 0.02
C8 \\sim C9 \\sim C10 \\sim C11 \\sim C12 \\sim C13 \\sim C9A \\sim C10A \\sim
C12A \\sim C13A: within 2A with sigma of 0.01 and sigma for terminal atoms of
0.02
Zr1 \\sim Zr2 \\sim O5 \\sim O6: within 2A with sigma of 0.003 and sigma for
terminal atoms of 0.003
Uanis(O13) \\sim Ueq, Uanis(O12) \\sim Ueq, Uanis(O12A) \\sim Ueq, Uanis(O9)
\\sim Ueq, Uanis(O10) \\sim Ueq, Uanis(O16) \\sim Ueq, Uanis(O15) \\sim Ueq:
with sigma of 0.01 and sigma for terminal atoms of 0.02
Uanis(C15A) \\sim Ueq, Uanis(C16A) \\sim Ueq, Uanis(C17A) \\sim Ueq,
Uanis(C18A) \\sim Ueq, Uanis(C19A) \\sim Ueq, Uanis(C20A) \\sim Ueq,
Uanis(C21A) \\sim Ueq, Uanis(C22A) \\sim Ueq, Uanis(C23A) \\sim Ueq,
Uanis(C24A) \\sim Ueq, Uanis(C25A) \\sim Ueq, Uanis(C26A) \\sim Ueq,
Uanis(C27A) \\sim Ueq: with sigma of 0.01 and sigma for terminal atoms of 0.02
6. Others
 Sof(C9A)=Sof(H9A)=Sof(C10A)=Sof(H10A)=Sof(C12A)=Sof(H12A)=Sof(C13A)=Sof(H13A)=
 1-FVAR(1)
 Sof(C9)=Sof(H9)=Sof(C10)=Sof(H10)=Sof(C12)=Sof(H12)=Sof(C13)=Sof(H13)=FVAR(1)
 Fixed Sof: Zr3(0.25) Zr4(0.125) Zr5(0.25) Zr6(0.125) O3(0.25) O4(0.25)
 O9(0.25) O10(0.25) O11(0.125) O12(0.125) O13(0.25) O14(0.25) O15(0.25)
 O16(0.25) C15(0.25) C16(0.25) C17(0.25) H17(0.25) C18(0.25) H18(0.25)
 C19(0.25) C20(0.25) H20(0.25) C21(0.25) H21(0.25) C22(0.25) C23(0.25)
 H23(0.25) C24(0.25) H24(0.25) C25(0.25) C26(0.25) H26(0.25) C27(0.25)
 H27(0.25) C28(0.25) C29(0.25) O3A(0.25) O4A(0.25) O11A(0.125) O12A(0.125)
 C15A(0.25) C16A(0.25) C17A(0.25) H17A(0.25) C18A(0.25) H18A(0.25) C19A(0.25)
 C20A(0.25) H20A(0.25) C21A(0.25) H21A(0.25) C22A(0.25) C23A(0.25) H23A(0.25)
 C24A(0.25) H24A(0.25) C25A(0.25) C26A(0.25) H26A(0.25) C27A(0.25) H27A(0.25)
 O3B(0.25) O4B(0.25) C15B(0.25) C16B(0.25) C17B(0.25) H17B(0.25) C18B(0.25)
 H18B(0.25) C19B(0.25) C20B(0.25) H20B(0.25) C21B(0.25) H21B(0.25) C22B(0.25)
 C23B(0.25) H23B(0.25) C24B(0.25) H24B(0.25) C25B(0.25) C26B(0.25) H26B(0.25)
 C27B(0.25) H27B(0.25) O3C(0.25) O4C(0.25) C15C(0.25) C16C(0.25) C17C(0.25)
 H17C(0.25) C18C(0.25) H18C(0.25) C19C(0.25) C20C(0.25) H20C(0.25) C21C(0.25)
 H21C(0.25) C22C(0.25) C23C(0.25) H23C(0.25) C24C(0.25) H24C(0.25) C25C(0.25)
 C26C(0.25) H26C(0.25) C27C(0.25) H27C(0.25)
7.a Riding coordinates:
 C24C(H24C)
7.b Aromatic/amide H refined with riding coordinates:
 C3(H3), C4(H4), C6(H6), C7(H7), C9(H9), C10(H10), C12(H12), C13(H13),
 C17(H17), C18(H18), C20(H20), C21(H21), C23(H23), C24(H24), C26(H26), C27(H27),
  C9A(H9A), C10A(H10A), C12A(H12A), C13A(H13A), C17A(H17A), C18A(H18A),
 C20A(H20A), C21A(H21A), C23A(H23A), C24A(H24A), C26A(H26A), C27A(H27A),
 C17B(H17B), C18B(H18B), C20B(H20B), C21B(H21B), C23B(H23B), C24B(H24B),
 C26B(H26B), C27B(H27B), C17C(H17C), C18C(H18C), C20C(H20C), C21C(H21C),
 C23C(H23C), C26C(H26C), C27C(H27C)
7.c Fitted hexagon refined as free rotating group:
 C2(C3,C4,C5,C6,C7), C8(C9,C10,C11,C12,C13), C16(C17,C18,C19,C20,C21), C22(C23,
 C24,C25,C26,C27), C16A(C17A,C18A,C19A,C20A,C21A), C22A(C23A,C24A,C25A,C26A,
 C27A), C16B(C17B,C18B,C19B,C20B,C21B), C22B(C23B,C24B,C25B,C26B,C27B),
 C16C(C17C,C18C,C19C,C20C,C21C), C22C(C23C,C24C,C25C,C26C,C27C)
;
_atom_sites_solution_hydrogens    mixed
_atom_sites_solution_primary      ?
_atom_sites_solution_secondary    ?
loop_
  _atom_site_label
  _atom_site_type_symbol
  _atom_site_fract_x
  _atom_site_fract_y
  _atom_site_fract_z
  _atom_site_U_iso_or_equiv
  _atom_site_adp_type
  _atom_site_occupancy
  _atom_site_site_symmetry_order
  _atom_site_calc_flag
  _atom_site_refinement_flags_posn
  _atom_site_refinement_flags_adp
  _atom_site_refinement_flags_occupancy
  _atom_site_disorder_assembly
  _atom_site_disorder_group
 Zr1 Zr 0.5000 0.55784(2) 0.5000 0.0355(4) Uani 1 4 d S TU P . .
 Zr2 Zr 0.41627(4) 0.5000 0.40114(4) 0.0415(4) Uani 1 2 d S TU P . .
 Zr3 Zr 0.91735(17) 0.48903(8) 0.0548(2) 0.0706(9) Uani 0.25 1 d D U . C .
 Zr4 Zr 1.0000 0.43049(9) -0.0411(2) 0.0676(10) Uani 0.25 2 d DS TU P . .
 Zr5 Zr 0.91637(17) 0.48784(9) -0.1415(2) 0.0745(9) Uani 0.25 1 d D U . . .
 Zr6 Zr 1.0000 0.54606(11) -0.0445(2) 0.0646(11) Uani 0.25 2 d DS TU P . .
 O1 O 0.5624(2) 0.58400(9) 0.5743(2) 0.0561(12) Uani 1 1 d . . . . .
 O2 O 0.6152(3) 0.54784(11) 0.6410(3) 0.0726(15) Uani 1 1 d . . . . .
 O3 O 0.890(2) 0.4444(4) 0.1008(19) 0.135(7) Uani 0.25 1 d D U . A 1
 O4 O 0.9375(14) 0.4057(6) 0.0343(14) 0.123(7) Uani 0.25 1 d D U . A 1
 O5 O 0.4173(4) 0.52729(19) 0.5000 0.084(2) Uani 1 2 d S TU P . .
 O6 O 0.5000 0.52788(16) 0.4000(5) 0.076(2) Uani 1 2 d S TU P . .
 O7 O 0.3142(4) 0.5000 0.4034(5) 0.079(2) Uani 1 2 d S T P . .
 O8 O 0.4239(4) 0.5000 0.2781(4) 0.078(2) Uani 1 2 d S T P . .
 O9 O 0.9117(8) 0.4584(4) -0.0422(9) 0.078(5) Uani 0.25 1 d D U . . .
 O10 O 0.9171(12) 0.5184(5) -0.0444(10) 0.115(7) Uani 0.25 1 d D U . B 1
 O11 O 1.0000 0.4635(5) 0.0469(11) 0.119(8) Uani 0.25 2 d DS TU P C 1
 O12 O 1.0000 0.5195(5) 0.0574(11) 0.113(8) Uani 0.25 2 d DS TU P C .
 O13 O 0.9164(13) 0.4916(12) 0.1734(6) 0.123(8) Uani 0.25 1 d D U . C .
 O14 O 0.8179(5) 0.4870(7) 0.0424(11) 0.127(9) Uani 0.25 1 d D U . C 1
 O15 O 0.9164(10) 0.4893(6) -0.2594(6) 0.113(7) Uani 0.25 1 d D U . D .
 O16 O 0.8174(5) 0.4844(7) -0.1311(11) 0.119(7) Uani 0.25 1 d D U . D 2
 C1 C 0.5968(4) 0.57562(15) 0.6277(4) 0.0599(19) Uani 1 1 d . . . . .
 C2 C 0.6178(3) 0.60068(9) 0.6810(3) 0.0647(19) Uani 1 1 d . . . . .
 C3 C 0.6600(3) 0.59399(9) 0.7383(3) 0.104(4) Uani 1 1 d G . . . .
 H3 H 0.6765 0.5733 0.7436 0.125 Uiso 1 1 calc R . . . .
 C4 C 0.6781(3) 0.61754(11) 0.7878(3) 0.113(4) Uani 1 1 d G . . . .
 H4 H 0.7070 0.6130 0.8269 0.135 Uiso 1 1 calc R . . . .
 C5 C 0.6540(3) 0.64778(10) 0.7800(3) 0.084(3) Uani 1 1 d G . . . .
 C6 C 0.6118(3) 0.65447(9) 0.7227(3) 0.095(3) Uani 1 1 d G . . . .
 H6 H 0.5953 0.6751 0.7174 0.114 Uiso 1 1 calc R . . . .
 C7 C 0.5937(3) 0.63092(11) 0.6732(3) 0.087(3) Uani 1 1 d G . . . .
 H7 H 0.5648 0.6355 0.6341 0.104 Uiso 1 1 calc R . . . .
 C8 C 0.6778(4) 0.67420(13) 0.8295(3) 0.086(2) Uani 1 1 d D U . . .
 C9 C 0.7422(3) 0.68037(19) 0.8308(5) 0.093(3) Uani 0.506(7) 1 d G U . E 1
 H9 H 0.7702 0.6679 0.8019 0.112 Uiso 0.506(7) 1 calc R . . E 1
 C10 C 0.7655(3) 0.7048(2) 0.8743(5) 0.092(3) Uani 0.506(7) 1 d G U . E 1
 H10 H 0.8096 0.7090 0.8752 0.111 Uiso 0.506(7) 1 calc R . . E 1
 C11 C 0.7245(4) 0.72312(12) 0.9166(3) 0.084(2) Uani 1 1 d DG U . E .
 C12 C 0.6601(3) 0.71695(19) 0.9153(5) 0.095(3) Uani 0.506(7) 1 d G U . E 1
 H12 H 0.6321 0.7294 0.9442 0.114 Uiso 0.506(7) 1 calc R . . E 1
 C13 C 0.6367(3) 0.6925(2) 0.8718(6) 0.096(3) Uani 0.506(7) 1 d G U . E 1
 H13 H 0.5927 0.6883 0.8709 0.116 Uiso 0.506(7) 1 calc R . . E 1
 C14 C 0.7500 0.7500 0.9634(6) 0.083(4) Uani 1 2 d S T P . .
 C15 C 0.901(3) 0.4148(5) 0.088(3) 0.132(6) Uani 0.25 1 d D U . A 1
 C16 C 0.879(2) 0.3874(5) 0.1366(16) 0.133(6) Uani 0.25 1 d D U . A 1
 C17 C 0.8953(19) 0.3564(6) 0.1214(15) 0.134(6) Uani 0.25 1 d G U . A 1
 H17 H 0.9170 0.3514 0.0765 0.161 Uiso 0.25 1 calc R . . A 1
 C18 C 0.8802(19) 0.3327(4) 0.1719(17) 0.133(6) Uani 0.25 1 d G U . A 1
 H18 H 0.8915 0.3115 0.1615 0.160 Uiso 0.25 1 calc R . . A 1
 C19 C 0.848(2) 0.3400(5) 0.2376(15) 0.130(6) Uani 0.25 1 d DG U . A 1
 C20 C 0.832(2) 0.3710(6) 0.2528(15) 0.132(6) Uani 0.25 1 d G U . A 1
 H20 H 0.8100 0.3760 0.2977 0.158 Uiso 0.25 1 calc R . . A 1
 C21 C 0.847(2) 0.3947(4) 0.2023(17) 0.133(6) Uani 0.25 1 d G U . A 1
 H21 H 0.8355 0.4159 0.2127 0.160 Uiso 0.25 1 calc R . . A 1
 C22 C 0.8285(17) 0.3136(5) 0.2905(15) 0.127(6) Uani 0.25 1 d D U . A 1
 C23 C 0.8539(14) 0.2835(6) 0.2864(15) 0.127(6) Uani 0.25 1 d G U . A 1
 H23 H 0.8892 0.2796 0.2552 0.152 Uiso 0.25 1 calc R . . A 1
 C24 C 0.8276(16) 0.2592(4) 0.3281(16) 0.125(6) Uani 0.25 1 d G U . A 1
 H24 H 0.8449 0.2387 0.3253 0.150 Uiso 0.25 1 calc R . . A 1
 C25 C 0.7759(16) 0.2651(5) 0.3738(15) 0.121(6) Uani 0.25 1 d DG U . A 1
 C26 C 0.7505(15) 0.2952(6) 0.3779(16) 0.120(6) Uani 0.25 1 d G U . A 1
 H26 H 0.7152 0.2991 0.4092 0.144 Uiso 0.25 1 calc R . . A 1
 C27 C 0.7768(17) 0.3195(4) 0.3363(16) 0.120(6) Uani 0.25 1 d G U . A 1
 H27 H 0.7595 0.3400 0.3391 0.145 Uiso 0.25 1 calc R . . A 1
 C28 C 0.748(3) 0.2386(6) 0.4206(6) 0.120(6) Uani 0.25 1 d D U . F 5
 C29 C 0.750(2) 0.2384(4) 0.5000 0.119(7) Uani 0.5 2 d DS TU P F 5
 O3A O 0.6223(12) 0.0345(4) 0.0823(17) 0.098(5) Uani 0.25 1 d D U . G 2
 O4A O 0.5642(10) 0.0712(5) 0.0283(12) 0.089(5) Uani 0.25 1 d D U . G 2
 O11A O 1.0000 0.4584(5) 0.1351(12) 0.114(9) Uani 0.25 2 d DS TU P . .
 O12A O 1.0000 0.5148(5) 0.1459(9) 0.115(9) Uani 0.25 2 d DS TU P . .
 C9A C 0.7227(5) 0.66813(18) 0.8838(6) 0.089(3) Uani 0.494(7) 1 d D U . E 2
 H9A H 0.7374 0.6473 0.8914 0.106 Uiso 0.494(7) 1 calc R . . E 2
 C10A C 0.7463(5) 0.6926(2) 0.9274(5) 0.090(3) Uani 0.494(7) 1 d D U . E 2
 H10A H 0.7772 0.6884 0.9645 0.108 Uiso 0.494(7) 1 calc R . . E 2
 C12A C 0.6800(6) 0.72931(18) 0.8619(6) 0.097(3) Uani 0.494(7) 1 d D U . E 2
 H12A H 0.6656 0.7502 0.8540 0.116 Uiso 0.494(7) 1 calc R . . E 2
 C13A C 0.6562(5) 0.7048(2) 0.8184(6) 0.098(3) Uani 0.494(7) 1 d D U . E 2
 H13A H 0.6253 0.7090 0.7813 0.117 Uiso 0.494(7) 1 calc R . . E 2
 C15A C 0.605(2) 0.0637(6) 0.078(2) 0.097(5) Uani 0.25 1 d D U . G 2
 C16A C 0.6250(14) 0.0896(6) 0.1311(16) 0.098(5) Uani 0.25 1 d D U . G 2
 C17A C 0.6715(14) 0.0834(5) 0.1838(17) 0.104(5) Uani 0.25 1 d G U . G 2
 H17A H 0.6903 0.0631 0.1862 0.125 Uiso 0.25 1 calc R . . G 2
 C18A C 0.6906(13) 0.1068(7) 0.2330(15) 0.105(5) Uani 0.25 1 d G U . G 2
 H18A H 0.7224 0.1026 0.2691 0.126 Uiso 0.25 1 calc R . . G 2
 C19A C 0.6632(15) 0.1365(6) 0.2295(16) 0.106(5) Uani 0.25 1 d DG U . G 2
 C20A C 0.6167(14) 0.1428(5) 0.1768(18) 0.105(5) Uani 0.25 1 d G U . G 2
 H20A H 0.5980 0.1630 0.1744 0.126 Uiso 0.25 1 calc R . . G 2
 C21A C 0.5976(12) 0.1193(7) 0.1276(16) 0.100(5) Uani 0.25 1 d G U . G 2
 H21A H 0.5658 0.1236 0.0915 0.120 Uiso 0.25 1 calc R . . G 2
 C22A C 0.6881(15) 0.1624(6) 0.2785(15) 0.107(5) Uani 0.25 1 d D U . G 2
 C23A C 0.7236(14) 0.1548(5) 0.3412(17) 0.103(5) Uani 0.25 1 d G U . G 2
 H23A H 0.7340 0.1334 0.3511 0.124 Uiso 0.25 1 calc R . . G 2
 C24A C 0.7439(13) 0.1784(7) 0.3894(14) 0.103(6) Uani 0.25 1 d G U . G 2
 H24A H 0.7682 0.1731 0.4322 0.124 Uiso 0.25 1 calc R . . G 2
 C25A C 0.7287(15) 0.2096(6) 0.3748(16) 0.106(6) Uani 0.25 1 d DG U . G 2
 C26A C 0.6932(14) 0.2172(5) 0.3121(17) 0.107(6) Uani 0.25 1 d G U . G 2
 H26A H 0.6828 0.2386 0.3022 0.128 Uiso 0.25 1 calc R . . G 2
 C27A C 0.6729(13) 0.1937(7) 0.2639(14) 0.109(5) Uani 0.25 1 d G U . G 2
 H27A H 0.6486 0.1989 0.2211 0.131 Uiso 0.25 1 calc R . . G 2
 O3B O 0.9350(13) 0.4072(7) 0.8840(13) 0.101(6) Uani 0.25 1 d D U . H 3
 O4B O 0.8931(19) 0.4433(4) 0.8095(17) 0.104(6) Uani 0.25 1 d D U . H 3
 C15B C 0.905(2) 0.4140(5) 0.8232(18) 0.105(5) Uani 0.25 1 d D U . H 3
 C16B C 0.8810(15) 0.3876(6) 0.7765(15) 0.107(5) Uani 0.25 1 d D U . H 3
 C17B C 0.8309(15) 0.3931(5) 0.7281(16) 0.108(6) Uani 0.25 1 d G U . H 3
 H17B H 0.8095 0.4127 0.7291 0.130 Uiso 0.25 1 calc R . . H 3
 C18B C 0.8120(14) 0.3698(7) 0.6783(15) 0.112(6) Uani 0.25 1 d G U . H 3
 H18B H 0.7778 0.3735 0.6453 0.135 Uiso 0.25 1 calc R . . H 3
 C19B C 0.8433(15) 0.3411(6) 0.6769(14) 0.113(5) Uani 0.25 1 d DG U . H 3
 C20B C 0.8934(14) 0.3356(5) 0.7253(16) 0.112(6) Uani 0.25 1 d G U . H 3
 H20B H 0.9148 0.3159 0.7244 0.134 Uiso 0.25 1 calc R . . H 3
 C21B C 0.9122(13) 0.3589(7) 0.7751(15) 0.109(6) Uani 0.25 1 d G U . H 3
 H21B H 0.9465 0.3551 0.8082 0.130 Uiso 0.25 1 calc R . . H 3
 C22B C 0.8174(14) 0.3167(6) 0.6244(15) 0.111(5) Uani 0.25 1 d D U . H 3
 C23B C 0.7527(13) 0.3114(6) 0.6252(16) 0.109(6) Uani 0.25 1 d G U . H 3
 H23B H 0.7260 0.3243 0.6550 0.130 Uiso 0.25 1 calc R . . H 3
 C24B C 0.7271(11) 0.2872(7) 0.5826(17) 0.110(6) Uani 0.25 1 d G U . H 3
 H24B H 0.6829 0.2836 0.5831 0.132 Uiso 0.25 1 calc R . . H 3
 C25B C 0.7662(14) 0.2684(5) 0.5391(14) 0.108(6) Uani 0.25 1 d DG U . H 3
 C26B C 0.8309(13) 0.2737(6) 0.5383(14) 0.102(6) Uani 0.25 1 d G U . H 3
 H26B H 0.8576 0.2609 0.5085 0.123 Uiso 0.25 1 calc R . . H 3
 C27B C 0.8565(11) 0.2979(7) 0.5809(15) 0.106(6) Uani 0.25 1 d G U . H 3
 H27B H 0.9008 0.3016 0.5803 0.127 Uiso 0.25 1 calc R . . H 3
 O3C O 0.6165(14) 0.0329(3) 0.8240(16) 0.105(6) Uani 0.25 1 d D U . I 4
 O4C O 0.5650(14) 0.0703(6) 0.8832(15) 0.101(6) Uani 0.25 1 d D U . I 4
 C15C C 0.603(3) 0.0624(5) 0.830(2) 0.101(5) Uani 0.25 1 d D U . I 4
 C16C C 0.6205(14) 0.0866(4) 0.7725(13) 0.103(5) Uani 0.25 1 d D U . I 4
 C17C C 0.5909(13) 0.1158(5) 0.7742(15) 0.101(6) Uani 0.25 1 d G U . I 4
 H17C H 0.5580 0.1196 0.8091 0.121 Uiso 0.25 1 calc R . . I 4
 C18C C 0.6094(14) 0.1393(4) 0.7250(16) 0.104(6) Uani 0.25 1 d G U . I 4
 H18C H 0.5891 0.1592 0.7262 0.125 Uiso 0.25 1 calc R . . I 4
 C19C C 0.6575(15) 0.1337(5) 0.6740(14) 0.107(5) Uani 0.25 1 d DG U . I 4
 C20C C 0.6872(13) 0.1045(5) 0.6722(15) 0.111(6) Uani 0.25 1 d G U . I 4
 H20C H 0.7201 0.1007 0.6373 0.133 Uiso 0.25 1 calc R . . I 4
 C21C C 0.6687(13) 0.0810(4) 0.7215(15) 0.108(6) Uani 0.25 1 d G U . I 4
 H21C H 0.6889 0.0610 0.7203 0.130 Uiso 0.25 1 calc R . . I 4
 C22C C 0.6825(14) 0.1598(6) 0.6256(15) 0.111(5) Uani 0.25 1 d D U . I 4
 C23C C 0.6404(11) 0.1785(6) 0.5858(16) 0.114(6) Uani 0.25 1 d G U . I 4
 H23C H 0.5964 0.1743 0.5882 0.136 Uiso 0.25 1 calc R . . I 4
 C24C C 0.6626(12) 0.2033(6) 0.5426(16) 0.114(6) Uani 0.25 1 d G U . I 4
 H24C H 0.6355 0.2174 0.5192 0.137 Uiso 0.25 1 d R . . I 4
 C25C C 0.7270(13) 0.2094(5) 0.5391(15) 0.114(6) Uani 0.25 1 d DG U . I 4
 C26C C 0.7691(11) 0.1908(6) 0.5789(18) 0.110(6) Uani 0.25 1 d G U . I 4
 H26C H 0.8131 0.1950 0.5765 0.133 Uiso 0.25 1 calc R . . I 4
 C27C C 0.7468(13) 0.1660(6) 0.6221(17) 0.112(6) Uani 0.25 1 d G U . I 4
 H27C H 0.7756 0.1532 0.6493 0.134 Uiso 0.25 1 calc R . . I 4

loop_
  _atom_site_aniso_label
  _atom_site_aniso_U_11
  _atom_site_aniso_U_22
  _atom_site_aniso_U_33
  _atom_site_aniso_U_23
  _atom_site_aniso_U_13
  _atom_site_aniso_U_12
 Zr1 0.0655(7) 0.0148(5) 0.0261(6) 0.000 0.000 0.000
 Zr2 0.0649(6) 0.0243(5) 0.0351(5) 0.000 -0.0113(3) 0.000
 Zr3 0.104(2) 0.0397(14) 0.0680(18) -0.0009(12) 0.0097(15) -0.0051(10)
 Zr4 0.109(3) 0.038(2) 0.056(2) 0.0001(17) 0.000 0.000
 Zr5 0.099(2) 0.0529(16) 0.0721(19) -0.0008(17) -0.0164(16) 0.0005(12)
 Zr6 0.098(3) 0.045(2) 0.051(2) 0.0004(18) 0.000 0.000
 O1 0.093(3) 0.032(2) 0.044(3) -0.0008(19) -0.002(2) -0.012(2)
 O2 0.107(4) 0.040(2) 0.071(3) -0.005(2) -0.037(3) -0.004(2)
 O3 0.233(19) 0.078(10) 0.095(13) 0.020(11) 0.045(14) -0.019(14)
 O4 0.231(18) 0.069(10) 0.069(11) 0.021(10) 0.028(12) -0.015(12)
 O5 0.151(6) 0.068(5) 0.032(3) 0.000 0.000 -0.064(4)
 O6 0.065(3) 0.049(4) 0.114(5) -0.062(4) 0.000 0.000
 O7 0.084(5) 0.068(5) 0.086(6) 0.000 -0.024(4) 0.000
 O8 0.146(7) 0.056(4) 0.031(3) 0.000 -0.021(4) 0.000
 O9 0.086(9) 0.066(9) 0.084(7) -0.014(7) -0.014(7) -0.001(7)
 O10 0.113(10) 0.120(12) 0.111(8) -0.012(8) -0.010(9) -0.017(8)
 O11 0.055(10) 0.23(3) 0.070(14) 0.025(15) 0.000 0.000
 O12 0.115(10) 0.107(11) 0.117(11) 0.004(8) 0.000 0.000
 O13 0.145(12) 0.122(14) 0.100(7) -0.011(8) 0.011(8) -0.001(9)
 O14 0.095(7) 0.14(3) 0.144(17) 0.002(15) 0.013(9) 0.026(11)
 O15 0.126(11) 0.115(13) 0.097(7) 0.004(8) -0.009(8) -0.004(9)
 O16 0.107(7) 0.125(12) 0.125(11) 0.010(9) -0.004(7) 0.017(8)
 C1 0.105(6) 0.035(3) 0.040(4) -0.004(3) -0.020(4) -0.015(3)
 C2 0.098(5) 0.040(3) 0.056(4) -0.009(3) -0.013(4) -0.019(3)
 C3 0.151(9) 0.056(5) 0.105(7) -0.013(5) -0.066(7) -0.014(5)
 C4 0.193(11) 0.052(5) 0.093(7) -0.018(5) -0.059(7) -0.020(6)
 C5 0.140(8) 0.052(4) 0.061(5) -0.015(4) -0.012(5) -0.036(5)
 C6 0.139(8) 0.054(5) 0.092(7) -0.027(5) -0.024(6) -0.008(5)
 C7 0.129(7) 0.057(5) 0.075(6) -0.017(4) -0.037(5) -0.008(5)
 C8 0.143(5) 0.056(3) 0.058(4) -0.015(3) -0.010(4) -0.044(4)
 C9 0.147(6) 0.065(5) 0.068(5) -0.018(5) -0.008(5) -0.041(5)
 C10 0.148(6) 0.067(5) 0.061(5) -0.016(5) -0.009(5) -0.045(5)
 C11 0.150(6) 0.054(3) 0.048(3) -0.005(3) -0.005(4) -0.049(4)
 C12 0.151(6) 0.065(5) 0.070(5) -0.020(5) -0.011(6) -0.033(5)
 C13 0.147(6) 0.065(5) 0.078(6) -0.021(5) -0.012(5) -0.035(5)
 C14 0.152(11) 0.058(6) 0.041(5) 0.000 0.000 -0.057(7)
 C15 0.234(17) 0.076(9) 0.087(11) 0.021(9) 0.040(11) -0.017(12)
 C16 0.237(16) 0.073(9) 0.089(10) 0.018(9) 0.047(11) -0.016(11)
 C17 0.238(17) 0.073(9) 0.091(11) 0.015(9) 0.048(11) -0.017(12)
 C18 0.238(17) 0.070(9) 0.092(11) 0.014(9) 0.045(11) -0.019(11)
 C19 0.237(16) 0.068(8) 0.085(10) 0.015(8) 0.040(10) -0.021(10)
 C20 0.238(17) 0.068(9) 0.089(11) 0.017(9) 0.046(11) -0.020(11)
 C21 0.238(17) 0.071(9) 0.091(11) 0.017(9) 0.048(11) -0.014(12)
 C22 0.237(15) 0.065(8) 0.077(10) 0.015(8) 0.028(10) -0.021(10)
 C23 0.238(16) 0.063(9) 0.080(11) 0.013(9) 0.025(11) -0.022(11)
 C24 0.237(17) 0.062(9) 0.075(11) 0.013(9) 0.023(11) -0.022(11)
 C25 0.236(16) 0.059(8) 0.069(10) 0.010(8) 0.018(9) -0.022(10)
 C26 0.232(16) 0.059(9) 0.069(11) 0.017(9) 0.019(10) -0.022(11)
 C27 0.229(16) 0.063(9) 0.070(11) 0.019(9) 0.023(10) -0.023(11)
 C28 0.242(17) 0.049(9) 0.070(10) 0.001(8) 0.008(9) -0.028(12)
 C29 0.246(19) 0.041(9) 0.070(11) 0.000 0.000 -0.038(13)
 O3A 0.098(11) 0.086(8) 0.111(11) -0.025(9) 0.002(10) -0.013(9)
 O4A 0.097(10) 0.083(9) 0.089(10) -0.027(8) 0.011(7) -0.016(8)
 O11A 0.044(11) 0.23(3) 0.067(14) 0.020(15) 0.000 0.000
 O12A 0.116(11) 0.110(12) 0.119(11) 0.004(8) 0.000 0.000
 C9A 0.148(7) 0.059(5) 0.059(5) -0.016(5) -0.015(5) -0.041(5)
 C10A 0.149(7) 0.060(5) 0.061(5) -0.015(5) -0.015(5) -0.041(5)
 C12A 0.155(7) 0.062(5) 0.074(6) -0.017(5) -0.018(5) -0.034(5)
 C13A 0.153(7) 0.066(5) 0.075(6) -0.017(5) -0.018(5) -0.031(5)
 C15A 0.098(8) 0.090(7) 0.102(8) -0.014(6) 0.004(6) -0.010(7)
 C16A 0.102(7) 0.094(6) 0.099(7) -0.011(6) -0.005(5) -0.006(6)
 C17A 0.107(8) 0.103(7) 0.103(8) -0.008(6) -0.007(6) -0.003(6)
 C18A 0.108(8) 0.105(7) 0.102(8) -0.006(6) -0.007(6) -0.004(6)
 C19A 0.110(7) 0.104(6) 0.104(7) -0.003(6) -0.005(5) -0.006(6)
 C20A 0.110(8) 0.099(7) 0.106(8) -0.006(6) -0.004(6) -0.003(6)
 C21A 0.101(8) 0.096(7) 0.102(8) -0.009(6) -0.004(6) -0.004(6)
 C22A 0.113(7) 0.104(6) 0.104(7) -0.002(5) -0.002(5) -0.006(6)
 C23A 0.105(8) 0.104(7) 0.101(8) -0.001(6) 0.000(6) -0.007(6)
 C24A 0.105(8) 0.104(8) 0.101(8) -0.001(6) 0.004(6) -0.005(7)
 C25A 0.108(8) 0.105(8) 0.104(8) 0.000(6) 0.001(6) -0.008(7)
 C26A 0.112(8) 0.104(7) 0.105(8) 0.001(6) -0.001(6) -0.007(7)
 C27A 0.116(8) 0.105(7) 0.107(8) 0.000(6) -0.002(6) -0.005(6)
 O3B 0.132(14) 0.093(13) 0.078(11) -0.013(10) -0.010(10) -0.034(12)
 O4B 0.129(14) 0.098(12) 0.084(12) -0.013(11) -0.026(11) -0.036(12)
 C15B 0.135(12) 0.097(11) 0.083(10) -0.017(9) -0.015(9) -0.034(10)
 C16B 0.147(12) 0.097(11) 0.078(10) -0.020(9) -0.010(9) -0.029(10)
 C17B 0.156(13) 0.096(11) 0.074(11) -0.019(10) -0.015(10) -0.029(11)
 C18B 0.164(13) 0.096(11) 0.076(11) -0.018(10) -0.012(10) -0.028(10)
 C19B 0.161(13) 0.098(10) 0.079(10) -0.023(9) -0.004(9) -0.024(10)
 C20B 0.155(13) 0.101(11) 0.080(11) -0.024(10) -0.002(10) -0.023(11)
 C21B 0.147(13) 0.100(11) 0.079(11) -0.021(10) -0.001(10) -0.024(10)
 C22B 0.158(13) 0.097(11) 0.077(10) -0.022(9) -0.002(10) -0.023(10)
 C23B 0.156(13) 0.095(12) 0.075(11) -0.020(10) 0.004(11) -0.023(11)
 C24B 0.156(14) 0.098(13) 0.075(12) -0.022(11) 0.003(11) -0.026(12)
 C25B 0.157(15) 0.094(13) 0.072(11) -0.020(11) 0.002(12) -0.028(12)
 C26B 0.152(14) 0.088(12) 0.067(11) -0.017(10) -0.002(11) -0.025(12)
 C27B 0.155(14) 0.091(12) 0.073(11) -0.019(10) -0.001(11) -0.026(11)
 O3C 0.172(15) 0.030(7) 0.114(13) 0.012(8) 0.015(12) -0.033(10)
 O4C 0.177(16) 0.033(9) 0.094(12) 0.013(9) 0.018(11) -0.039(10)
 C15C 0.170(14) 0.032(7) 0.102(11) 0.008(8) 0.017(10) -0.037(9)
 C16C 0.167(13) 0.044(7) 0.098(10) 0.014(8) 0.017(9) -0.040(9)
 C17C 0.163(14) 0.044(8) 0.096(11) 0.016(8) 0.010(10) -0.041(9)
 C18C 0.166(14) 0.051(8) 0.096(11) 0.016(9) 0.010(10) -0.042(9)
 C19C 0.167(13) 0.060(8) 0.094(10) 0.018(8) 0.011(9) -0.043(9)
 C20C 0.172(14) 0.063(9) 0.098(11) 0.015(9) 0.017(10) -0.039(10)
 C21C 0.172(14) 0.055(8) 0.098(11) 0.011(9) 0.019(10) -0.036(10)
 C22C 0.168(13) 0.072(9) 0.091(10) 0.025(9) 0.002(10) -0.049(9)
 C23C 0.171(14) 0.079(10) 0.091(12) 0.027(10) -0.006(11) -0.052(10)
 C24C 0.169(15) 0.081(11) 0.091(12) 0.029(10) -0.010(12) -0.054(11)
 C25C 0.172(15) 0.081(11) 0.090(12) 0.031(10) -0.013(12) -0.057(11)
 C26C 0.169(15) 0.073(11) 0.089(12) 0.029(11) -0.013(12) -0.057(11)
 C27C 0.168(14) 0.079(11) 0.089(12) 0.028(10) -0.007(11) -0.055(11)

_geom_special_details
;
 All esds (except the esd in the dihedral angle between two l.s. planes)
 are estimated using the full covariance matrix.  The cell esds are taken
 into account individually in the estimation of esds in distances, angles
 and torsion angles; correlations between esds in cell parameters are only
 used when they are defined by crystal symmetry.  An approximate (isotropic)
 treatment of cell esds is used for estimating esds involving l.s. planes.
;
loop_
  _geom_bond_atom_site_label_1
  _geom_bond_atom_site_label_2
  _geom_bond_distance
  _geom_bond_site_symmetry_2
  _geom_bond_publ_flag
 Zr1 Zr2 3.5099(7) . ?
 Zr1 Zr2 3.5100(7) 9_666 ?
 Zr1 Zr2 3.5100(7) 10_556 ?
 Zr1 Zr2 3.5100(7) 2_665 ?
 Zr1 O1 2.179(4) 11_655 ?
 Zr1 O1 2.179(4) 4_656 ?
 Zr1 O1 2.179(4) 10_556 ?
 Zr1 O1 2.180(4) . ?
 Zr1 O5 2.181(7) . ?
 Zr1 O5 2.181(7) 11_655 ?
 Zr1 O6 2.196(6) . ?
 Zr1 O6 2.195(6) 10_556 ?
 Zr2 Zr1 3.5099(7) 9_666 ?
 Zr2 Zr2 3.5490(15) 2_665 ?
 Zr2 Zr2 3.5381(14) 10_556 ?
 Zr2 O2 2.268(5) 9_666 ?
 Zr2 O2 2.268(5) 4_656 ?
 Zr2 O5 2.115(4) . ?
 Zr2 O5 2.115(4) 3_566 ?
 Zr2 O6 2.134(4) 2_665 ?
 Zr2 O6 2.134(4) . ?
 Zr2 O7 2.163(8) . ?
 Zr2 O8 2.209(7) . ?
 Zr3 Zr3 1.961(7) 10 ?
 Zr3 Zr3 0.932(6) 12_565 ?
 Zr3 Zr5 1.836(6) 3_565 ?
 Zr3 Zr5 1.552(6) 10 ?
 Zr3 O9 1.325(17) 10 ?
 Zr3 O10 1.26(2) 10 ?
 Zr3 O10 1.804(18) 12_565 ?
 Zr3 O11 2.066(11) . ?
 Zr3 O12 1.790(6) 2_765 ?
 Zr3 O13 2.125(10) . ?
 Zr3 O14 2.122(10) . ?
 Zr3 O3A 1.395(19) 6_655 ?
 Zr4 Zr4 1.472(8) 10 ?
 Zr4 Zr6 0.998(6) 2_765 ?
 Zr4 Zr6 1.828(6) 9_765 ?
 Zr4 O4 1.70(3) 4_755 ?
 Zr4 O4 1.70(3) 10 ?
 Zr4 O11 1.41(2) 10 ?
 Zr4 O4A 1.844(18) 16 ?
 Zr4 O4A 1.844(18) 6_655 ?
 Zr4 O4A 1.38(2) 13_655 ?
 Zr4 O4A 1.38(2) 7 ?
 Zr4 O4C 1.933(19) 6_654 ?
 Zr4 O4C 1.933(19) 16_554 ?
 Zr5 Zr3 1.836(6) 3_565 ?
 Zr5 Zr3 1.552(6) 10 ?
 Zr5 Zr5 1.033(8) 12_565 ?
 Zr5 O3 2.06(3) 10 ?
 Zr5 O10 1.757(18) 12_565 ?
 Zr5 O13 0.592(15) 10 ?
 Zr5 O13 1.04(4) 3_565 ?
 Zr5 O15 2.111(10) . ?
 Zr5 O16 2.110(10) . ?
 Zr5 O3A 1.64(3) 13_655 ?
 Zr5 O12A 1.778(4) 9_765 ?
 Zr5 O3C 1.284(19) 6_654 ?
 Zr6 Zr4 0.998(6) 2_765 ?
 Zr6 Zr4 1.828(6) 9_765 ?
 Zr6 Zr6 1.594(9) 10 ?
 Zr6 O9 1.882(17) 12_565 ?
 Zr6 O9 1.882(17) 2_765 ?
 Zr6 O10 2.115(19) 11_755 ?
 Zr6 O10 2.115(19) . ?
 Zr6 O11 1.686(17) 2_765 ?
 Zr6 O12 1.151(18) 10 ?
 Zr6 O4A 1.75(2) 8_655 ?
 Zr6 O4A 1.75(2) 14 ?
 Zr6 O11A 1.63(2) 9_765 ?
 O1 C1 1.255(8) . ?
 O2 Zr2 2.268(5) 9_666 ?
 O2 C1 1.266(8) . ?
 O3 Zr4 2.62(4) 10 ?
 O3 Zr5 2.06(3) 10 ?
 O3 Zr6 2.56(4) 9_765 ?
 O3 O9 1.29(3) 10 ?
 O3 C15 1.298(10) . ?
 O4 Zr4 1.70(3) 10 ?
 O4 Zr6 2.45(3) 9_765 ?
 O4 O4 1.23(5) 10 ?
 O4 C15 1.295(10) . ?
 O5 Zr2 2.115(4) 10_556 ?
 O6 Zr2 2.134(4) 2_665 ?
 O9 Zr3 2.247(17) 3_565 ?
 O9 Zr3 1.325(17) 10 ?
 O9 Zr6 1.882(17) 2_765 ?
 O9 O3 1.29(3) 10 ?
 O9 O9 1.51(3) 10 ?
 O9 O10 0.99(3) 12_565 ?
 O9 O3A 1.06(3) 13_655 ?
 O9 O4A 1.38(3) 13_655 ?
 O9 C15A 1.19(3) 13_655 ?
 O10 Zr3 0.36(2) 3_565 ?
 O10 Zr3 1.804(18) 12_565 ?
 O10 Zr3 1.26(2) 10 ?
 O10 Zr5 1.756(18) 12_565 ?
 O10 Zr6 2.647(19) 10 ?
 O10 O9 0.99(3) 12_565 ?
 O10 O10 1.59(4) 10 ?
 O10 O10 1.56(5) 12_565 ?
 O10 O12 1.77(3) 10 ?
 O11 Zr3 2.676(16) 2_765 ?
 O11 Zr3 2.066(11) 11_755 ?
 O11 Zr4 1.41(2) 10 ?
 O11 Zr5 2.660(12) 4_755 ?
 O11 Zr5 2.660(12) 10 ?
 O11 Zr6 1.686(17) 2_765 ?
 O11 Zr6 0.41(2) 9_765 ?
 O11 O11 1.68(4) 10 ?
 O11 O12 0.75(3) 2_765 ?
 O11 O11A 1.594(10) . ?
 O12 Zr3 1.790(6) 12_565 ?
 O12 Zr3 1.790(6) 2_765 ?
 O12 Zr4 2.144(19) 9_765 ?
 O12 Zr6 1.151(18) 10 ?
 O12 O10 1.77(3) 4_755 ?
 O12 O10 1.77(3) 10 ?
 O12 O11 0.75(3) 2_765 ?
 O12 O12 1.66(4) 2_765 ?
 O12 O11A 1.68(3) 2_765 ?
 O12 O12A 1.597(10) . ?
 O13 Zr3 2.28(2) 12_565 ?
 O13 Zr5 0.592(15) 10 ?
 O13 Zr5 1.04(4) 3_565 ?
 O13 O13 0.71(10) 12_565 ?
 O13 O15 1.543(17) 10 ?
 O13 O15 1.74(3) 3_565 ?
 O13 O3C 1.26(5) 13_656 ?
 O14 Zr3 2.352(14) 12_565 ?
 O14 Zr3 2.734(17) 10 ?
 O14 Zr5 2.739(15) 10 ?
 O14 O14 1.11(6) 12_565 ?
 O14 O14 1.52(4) 10 ?
 O15 Zr5 2.323(15) 12_565 ?
 O15 O13 1.543(17) 10 ?
 O15 O13 1.74(3) 3_565 ?
 O15 O15 0.91(5) 12_565 ?
 O16 Zr3 2.527(16) 10 ?
 O16 Zr5 2.412(16) 12_565 ?
 O16 O16 1.32(6) 12_565 ?
 O16 O3A 1.74(3) 13_655 ?
 C1 C2 1.498(7) . ?
 C2 C3 1.3900 . ?
 C2 C7 1.3900 . ?
 C3 C4 1.3900 . ?
 C4 C5 1.3900 . ?
 C5 C6 1.3900 . ?
 C5 C8 1.517(5) . ?
 C6 C7 1.3900 . ?
 C8 C9 1.3900 . ?
 C8 C13 1.3900 . ?
 C8 C9A 1.384(8) . ?
 C8 C13A 1.393(8) . ?
 C9 C10 1.3900 . ?
 C10 C11 1.3900 . ?
 C11 C12 1.3900 . ?
 C11 C14 1.516(7) . ?
 C11 C10A 1.391(8) . ?
 C11 C12A 1.385(8) . ?
 C12 C13 1.3900 . ?
 C14 C11 1.516(9) 6_665 ?
 C14 C14 1.31(2) 13_667 ?
 C15 Zr4 2.36(4) 10 ?
 C15 Zr6 2.79(4) 9_765 ?
 C15 C16 1.530(19) . ?
 C16 C17 1.3900 . ?
 C16 C21 1.3900 . ?
 C17 C18 1.3900 . ?
 C18 C19 1.3900 . ?
 C19 C20 1.3900 . ?
 C19 C22 1.526(16) . ?
 C20 C21 1.3900 . ?
 C22 C23 1.3900 . ?
 C22 C27 1.3900 . ?
 C23 C24 1.3900 . ?
 C24 C25 1.3900 . ?
 C25 C25 1.69(5) 6_655 ?
 C25 C26 1.3900 . ?
 C26 C27 1.3900 . ?
 C28 C28 0.97(5) 6_655 ?
 C28 C29 1.421(10) . ?
 C28 C29 1.725(19) 13_656 ?
 C29 C28 1.725(19) 6_655 ?
 C29 C28 1.421(10) 10_556 ?
 C29 C28 1.725(19) 13_656 ?
 C29 C29 0.99(4) 13_656 ?
 O3A Zr3 1.395(19) 6_655 ?
 O3A Zr3 2.163(16) 15_645 ?
 O3A Zr5 2.39(2) 8_645 ?
 O3A Zr5 1.64(3) 13_655 ?
 O3A Zr6 2.72(3) 14_445 ?
 O3A O9 1.06(3) 13_655 ?
 O3A O16 1.74(3) 13_655 ?
 O3A C15A 1.293(10) . ?
 O4A Zr3 2.63(2) 6_655 ?
 O4A Zr4 1.844(18) 6_655 ?
 O4A Zr4 1.38(2) 13_655 ?
 O4A Zr6 1.75(2) 14_445 ?
 O4A Zr6 2.165(15) 5_445 ?
 O4A O9 1.38(3) 13_655 ?
 O4A O4A 1.01(4) 10 ?
 O4A C15A 1.289(10) . ?
 O11A Zr3 2.614(9) 11_755 ?
 O11A Zr4 2.06(3) 10 ?
 O11A Zr5 2.173(13) 4_755 ?
 O11A Zr5 2.173(13) 10 ?
 O11A Zr6 1.63(2) 9_765 ?
 O11A O12 1.68(3) 2_765 ?
 O11A O12A 1.16(5) 2_765 ?
 O12A Zr3 2.631(9) 11_755 ?
 O12A Zr3 2.398(11) 2_765 ?
 O12A Zr3 2.398(11) 12_565 ?
 O12A Zr5 1.778(4) 9_765 ?
 O12A Zr5 2.111(12) 4_755 ?
 O12A Zr5 1.778(4) 3_565 ?
 O12A Zr5 2.111(12) 10 ?
 O12A Zr6 2.25(2) 10 ?
 O12A O11A 1.16(5) 2_765 ?
 O12A O12A 1.26(4) 2_765 ?
 C9A C10A 1.391(8) . ?
 C12A C13A 1.394(8) . ?
 C15A Zr3 2.33(3) 6_655 ?
 C15A Zr4 2.34(3) 13_655 ?
 C15A Zr5 2.51(4) 13_655 ?
 C15A Zr6 2.43(4) 14_445 ?
 C15A O9 1.19(3) 13_655 ?
 C15A C16A 1.513(18) . ?
 C16A C17A 1.3900 . ?
 C16A C21A 1.3900 . ?
 C17A C18A 1.3900 . ?
 C18A C19A 1.3900 . ?
 C19A C20A 1.3900 . ?
 C19A C22A 1.503(17) . ?
 C20A C21A 1.3900 . ?
 C22A C23A 1.3900 . ?
 C22A C27A 1.3900 . ?
 C23A C24A 1.3900 . ?
 C24A C25A 1.3900 . ?
 C25A C26A 1.3900 . ?
 C26A C27A 1.3900 . ?
 O3B Zr4 2.161(16) 1_556 ?
 O3B Zr6 2.73(2) 2_766 ?
 O3B C15B 1.293(10) . ?
 O4B Zr5 2.144(16) 1_556 ?
 O4B C15B 1.293(10) . ?
 C15B C16B 1.490(18) . ?
 C16B C17B 1.3900 . ?
 C16B C21B 1.3900 . ?
 C17B C18B 1.3900 . ?
 C18B C19B 1.3900 . ?
 C19B C20B 1.3900 . ?
 C19B C22B 1.500(16) . ?
 C20B C21B 1.3900 . ?
 C22B C23B 1.3900 . ?
 C22B C27B 1.3900 . ?
 C23B C24B 1.3900 . ?
 C24B C25B 1.3900 . ?
 C25B C25B 1.40(5) 10_556 ?
 C25B C25B 1.71(4) 6_655 ?
 C25B C26B 1.96(3) 10_556 ?
 C25B C26B 1.3900 . ?
 C26B C27B 1.3900 . ?
 O3C Zr3 2.47(2) 13_656 ?
 O3C Zr5 2.131(14) 15_646 ?
 O3C Zr5 1.284(19) 6_656 ?
 O3C O13 1.26(5) 13_656 ?
 O3C C15C 1.288(10) . ?
 O4C Zr4 1.933(19) 6_656 ?
 O4C Zr5 2.54(3) 6_656 ?
 O4C Zr6 2.152(16) 5_446 ?
 O4C C15C 1.294(10) . ?
 C15C Zr5 2.23(2) 6_656 ?
 C15C C16C 1.498(18) . ?
 C16C C17C 1.3900 . ?
 C16C C21C 1.3900 . ?
 C17C C18C 1.3900 . ?
 C18C C19C 1.3900 . ?
 C19C C20C 1.3900 . ?
 C19C C22C 1.505(14) . ?
 C20C C21C 1.3900 . ?
 C22C C23C 1.3900 . ?
 C22C C27C 1.3900 . ?
 C23C C24C 1.3900 . ?
 C24C C25C 1.3900 . ?
 C24C C25C 2.02(4) 10_556 ?
 C25C C24C 2.02(4) 10_556 ?
 C25C C25C 1.40(5) 10_556 ?
 C25C C26C 1.3900 . ?
 C26C C27C 1.3900 . ?

loop_
  _geom_angle_atom_site_label_1
  _geom_angle_atom_site_label_2
  _geom_angle_atom_site_label_3
  _geom_angle
  _geom_angle_site_symmetry_1
  _geom_angle_site_symmetry_3
  _geom_angle_publ_flag
 Zr2 Zr1 Zr2 60.74(3) . 2_665 ?
 Zr2 Zr1 Zr2 91.10(2) 2_665 10_556 ?
 Zr2 Zr1 Zr2 60.53(2) . 10_556 ?
 Zr2 Zr1 Zr2 60.53(2) 2_665 9_666 ?
 Zr2 Zr1 Zr2 60.74(3) 10_556 9_666 ?
 Zr2 Zr1 Zr2 91.10(2) . 9_666 ?
 O1 Zr1 Zr2 75.12(12) 10_556 2_665 ?
 O1 Zr1 Zr2 110.88(12) 4_656 2_665 ?
 O1 Zr1 Zr2 166.22(12) 11_655 2_665 ?
 O1 Zr1 Zr2 110.98(13) . 2_665 ?
 O1 Zr1 Zr2 110.88(12) 11_655 9_666 ?
 O1 Zr1 Zr2 75.12(12) 4_656 . ?
 O1 Zr1 Zr2 166.22(12) . . ?
 O1 Zr1 Zr2 75.12(12) . 9_666 ?
 O1 Zr1 Zr2 166.22(12) 4_656 9_666 ?
 O1 Zr1 Zr2 110.98(13) 11_655 . ?
 O1 Zr1 Zr2 110.98(13) 10_556 9_666 ?
 O1 Zr1 Zr2 166.22(12) 10_556 10_556 ?
 O1 Zr1 Zr2 110.88(12) 10_556 . ?
 O1 Zr1 Zr2 110.98(13) 4_656 10_556 ?
 O1 Zr1 Zr2 75.12(12) 11_655 10_556 ?
 O1 Zr1 Zr2 110.88(12) . 10_556 ?
 O1 Zr1 O1 75.2(2) 4_656 11_655 ?
 O1 Zr1 O1 74.7(3) 11_655 . ?
 O1 Zr1 O1 118.7(2) 4_656 . ?
 O1 Zr1 O1 74.7(3) 4_656 10_556 ?
 O1 Zr1 O1 118.7(2) 11_655 10_556 ?
 O1 Zr1 O1 75.2(2) 10_556 . ?
 O1 Zr1 O5 79.4(2) . 11_655 ?
 O1 Zr1 O5 142.27(12) 11_655 11_655 ?
 O1 Zr1 O5 142.27(12) 4_656 11_655 ?
 O1 Zr1 O5 142.27(12) 10_556 . ?
 O1 Zr1 O5 79.4(2) 10_556 11_655 ?
 O1 Zr1 O5 142.27(12) . . ?
 O1 Zr1 O5 79.4(2) 4_656 . ?
 O1 Zr1 O5 79.4(2) 11_655 . ?
 O1 Zr1 O6 142.44(14) 11_655 . ?
 O1 Zr1 O6 78.4(2) 4_656 . ?
 O1 Zr1 O6 142.44(14) . . ?
 O1 Zr1 O6 78.4(2) 11_655 10_556 ?
 O1 Zr1 O6 142.44(14) 4_656 10_556 ?
 O1 Zr1 O6 142.44(14) 10_556 10_556 ?
 O1 Zr1 O6 78.4(2) 10_556 . ?
 O1 Zr1 O6 78.4(2) . 10_556 ?
 O5 Zr1 Zr2 89.4(2) . 9_666 ?
 O5 Zr1 Zr2 89.4(2) 11_655 10_556 ?
 O5 Zr1 Zr2 34.61(12) . 10_556 ?
 O5 Zr1 Zr2 89.4(2) 11_655 . ?
 O5 Zr1 Zr2 34.61(12) . . ?
 O5 Zr1 Zr2 89.4(2) . 2_665 ?
 O5 Zr1 Zr2 34.61(12) 11_655 9_666 ?
 O5 Zr1 Zr2 34.61(12) 11_655 2_665 ?
 O5 Zr1 O5 106.9(5) . 11_655 ?
 O5 Zr1 O6 69.81(16) . . ?
 O5 Zr1 O6 69.81(16) . 10_556 ?
 O5 Zr1 O6 69.81(16) 11_655 . ?
 O5 Zr1 O6 69.81(16) 11_655 10_556 ?
 O6 Zr1 Zr2 35.25(11) . 2_665 ?
 O6 Zr1 Zr2 35.25(12) 10_556 10_556 ?
 O6 Zr1 Zr2 90.3(2) . 9_666 ?
 O6 Zr1 Zr2 90.3(2) 10_556 2_665 ?
 O6 Zr1 Zr2 35.25(11) 10_556 9_666 ?
 O6 Zr1 Zr2 90.3(2) . 10_556 ?
 O6 Zr1 Zr2 35.25(12) . . ?
 O6 Zr1 Zr2 90.3(2) 10_556 . ?
 O6 Zr1 O6 109.1(5) 10_556 . ?
 Zr1 Zr2 Zr1 88.90(2) 9_666 . ?
 Zr1 Zr2 Zr2 59.632(13) 9_666 2_665 ?
 Zr1 Zr2 Zr2 59.735(12) . 10_556 ?
 Zr1 Zr2 Zr2 59.735(12) 9_666 10_556 ?
 Zr1 Zr2 Zr2 59.632(13) . 2_665 ?
 Zr2 Zr2 Zr2 90.0 10_556 2_665 ?
 O2 Zr2 Zr1 71.85(12) 9_666 9_666 ?
 O2 Zr2 Zr1 71.85(12) 4_656 . ?
 O2 Zr2 Zr1 160.68(13) 4_656 9_666 ?
 O2 Zr2 Zr1 160.68(13) 9_666 . ?
 O2 Zr2 Zr2 109.40(14) 4_656 10_556 ?
 O2 Zr2 Zr2 107.11(15) 4_656 2_665 ?
 O2 Zr2 Zr2 107.11(15) 9_666 2_665 ?
 O2 Zr2 Zr2 109.40(14) 9_666 10_556 ?
 O2 Zr2 O2 127.3(2) 9_666 4_656 ?
 O5 Zr2 Zr1 35.85(19) . . ?
 O5 Zr2 Zr1 87.5(2) . 9_666 ?
 O5 Zr2 Zr1 35.85(19) 3_566 9_666 ?
 O5 Zr2 Zr1 87.5(2) 3_566 . ?
 O5 Zr2 Zr2 33.25(18) 3_566 10_556 ?
 O5 Zr2 Zr2 89.4(2) 3_566 2_665 ?
 O5 Zr2 Zr2 89.4(2) . 2_665 ?
 O5 Zr2 Zr2 33.25(18) . 10_556 ?
 O5 Zr2 O2 140.5(2) 3_566 4_656 ?
 O5 Zr2 O2 77.9(2) . 4_656 ?
 O5 Zr2 O2 77.9(2) 3_566 9_666 ?
 O5 Zr2 O2 140.5(2) . 9_666 ?
 O5 Zr2 O5 66.5(4) . 3_566 ?
 O5 Zr2 O6 107.7(3) 3_566 . ?
 O5 Zr2 O6 72.2(3) 3_566 2_665 ?
 O5 Zr2 O6 72.2(3) . . ?
 O5 Zr2 O6 107.7(3) . 2_665 ?
 O5 Zr2 O7 89.7(3) 3_566 . ?
 O5 Zr2 O7 89.7(3) . . ?
 O5 Zr2 O8 146.44(17) . . ?
 O5 Zr2 O8 146.44(17) 3_566 . ?
 O6 Zr2 Zr1 88.5(2) 2_665 . ?
 O6 Zr2 Zr1 88.5(2) . 9_666 ?
 O6 Zr2 Zr1 36.43(17) 2_665 9_666 ?
 O6 Zr2 Zr1 36.43(17) . . ?
 O6 Zr2 Zr2 90.5(2) . 10_556 ?
 O6 Zr2 Zr2 33.74(16) 2_665 2_665 ?
 O6 Zr2 Zr2 33.74(16) . 2_665 ?
 O6 Zr2 Zr2 90.5(2) 2_665 10_556 ?
 O6 Zr2 O2 75.2(2) . 4_656 ?
 O6 Zr2 O2 137.7(2) 2_665 4_656 ?
 O6 Zr2 O2 137.7(2) . 9_666 ?
 O6 Zr2 O2 75.2(2) 2_665 9_666 ?
 O6 Zr2 O6 67.5(3) . 2_665 ?
 O6 Zr2 O7 146.27(16) . . ?
 O6 Zr2 O7 146.26(16) 2_665 . ?
 O6 Zr2 O8 86.0(3) 2_665 . ?
 O6 Zr2 O8 86.0(3) . . ?
 O7 Zr2 Zr1 119.75(13) . . ?
 O7 Zr2 Zr1 119.75(13) . 9_666 ?
 O7 Zr2 Zr2 88.9(2) . 10_556 ?
 O7 Zr2 Zr2 178.9(2) . 2_665 ?
 O7 Zr2 O2 73.26(18) . 9_666 ?
 O7 Zr2 O2 73.26(18) . 4_656 ?
 O7 Zr2 O8 95.3(3) . . ?
 O8 Zr2 Zr1 117.74(14) . . ?
 O8 Zr2 Zr1 117.74(14) . 9_666 ?
 O8 Zr2 Zr2 175.8(2) . 10_556 ?
 O8 Zr2 Zr2 85.8(2) . 2_665 ?
 O8 Zr2 O2 71.96(17) . 9_666 ?
 O8 Zr2 O2 71.96(17) . 4_656 ?
 Zr3 Zr3 Zr3 90.003(1) 12_565 10 ?
 Zr3 Zr3 Zr5 57.64(17) 12_565 3_565 ?
 Zr3 Zr3 Zr5 91.86(16) 12_565 10 ?
 Zr3 Zr3 O9 168.9(7) 12_565 10 ?
 Zr3 Zr3 O10 100.0(8) 12_565 12_565 ?
 Zr3 Zr3 O10 8.5(9) 12_565 10 ?
 Zr3 Zr3 O11 86.1(5) 10 . ?
 Zr3 Zr3 O11 121.7(5) 12_565 . ?
 Zr3 Zr3 O12 101.7(6) 12_565 2_765 ?
 Zr3 Zr3 O13 87.1(13) 12_565 . ?
 Zr3 Zr3 O13 177.0(13) 10 . ?
 Zr3 Zr3 O14 84.0(5) 10 . ?
 Zr3 Zr3 O14 92.3(8) 12_565 . ?
 Zr3 Zr3 O3A 135.7(11) 12_565 6_655 ?
 Zr5 Zr3 Zr3 177.98(18) 10 10 ?
 Zr5 Zr3 Zr3 147.64(18) 3_565 10 ?
 Zr5 Zr3 Zr5 34.2(3) 10 3_565 ?
 Zr5 Zr3 O10 168.1(8) 10 12_565 ?
 Zr5 Zr3 O11 93.6(6) 10 . ?
 Zr5 Zr3 O11 110.4(5) 3_565 . ?
 Zr5 Zr3 O12 88.9(7) 10 2_765 ?
 Zr5 Zr3 O13 29.4(13) 3_565 . ?
 Zr5 Zr3 O13 4.8(14) 10 . ?
 Zr5 Zr3 O14 95.7(6) 3_565 . ?
 Zr5 Zr3 O14 95.2(6) 10 . ?
 O9 Zr3 Zr3 80.2(7) 10 10 ?
 O9 Zr3 Zr5 131.9(8) 10 3_565 ?
 O9 Zr3 Zr5 97.8(7) 10 10 ?
 O9 Zr3 O10 70.2(10) 10 12_565 ?
 O9 Zr3 O11 63.2(9) 10 . ?
 O9 Zr3 O12 83.9(10) 10 2_765 ?
 O9 Zr3 O13 102.6(15) 10 . ?
 O9 Zr3 O14 81.5(10) 10 . ?
 O9 Zr3 O3A 45.8(12) 10 6_655 ?
 O10 Zr3 Zr3 81.6(9) 10 10 ?
 O10 Zr3 Zr3 10.0(8) 12_565 10 ?
 O10 Zr3 Zr5 100.3(9) 10 10 ?
 O10 Zr3 Zr5 66.1(9) 10 3_565 ?
 O10 Zr3 Zr5 157.7(8) 12_565 3_565 ?
 O10 Zr3 O9 161.0(12) 10 10 ?
 O10 Zr3 O10 91.6(13) 10 12_565 ?
 O10 Zr3 O11 81.0(9) 12_565 . ?
 O10 Zr3 O11 120.9(14) 10 . ?
 O10 Zr3 O12 102.0(14) 10 2_765 ?
 O10 Zr3 O13 95.5(17) 10 . ?
 O10 Zr3 O13 172.9(16) 12_565 . ?
 O10 Zr3 O14 83.5(11) 12_565 . ?
 O10 Zr3 O14 91.2(15) 10 . ?
 O11 Zr3 O13 95.9(11) . . ?
 O11 Zr3 O14 144.5(8) . . ?
 O12 Zr3 Zr3 91.5(6) 2_765 10 ?
 O12 Zr3 Zr5 95.6(5) 2_765 3_565 ?
 O12 Zr3 O10 89.6(10) 2_765 12_565 ?
 O12 Zr3 O11 20.8(9) 2_765 . ?
 O12 Zr3 O13 89.7(10) 2_765 . ?
 O12 Zr3 O14 165.3(9) 2_765 . ?
 O14 Zr3 O13 95.6(8) . . ?
 O3A Zr3 Zr3 110.7(13) 6_655 10 ?
 O3A Zr3 Zr5 67.4(13) 6_655 10 ?
 O3A Zr3 Zr5 94.5(12) 6_655 3_565 ?
 O3A Zr3 O12 115.8(13) 6_655 2_765 ?
 O3A Zr3 O13 71.2(17) 6_655 . ?
 Zr4 Zr4 Zr6 33.02(19) 10 9_765 ?
 Zr4 Zr4 O4 85.9(8) 10 4_755 ?
 Zr4 Zr4 O4 85.9(8) 10 10 ?
 Zr4 Zr4 O4A 47.7(8) 10 6_655 ?
 Zr4 Zr4 O4A 47.7(8) 10 16 ?
 Zr4 Zr4 O4C 134.5(10) 10 6_654 ?
 Zr4 Zr4 O4C 134.5(10) 10 16_554 ?
 Zr6 Zr4 Zr4 93.5(3) 2_765 10 ?
 Zr6 Zr4 Zr6 60.5(4) 2_765 9_765 ?
 Zr6 Zr4 O4 128.6(10) 2_765 4_755 ?
 Zr6 Zr4 O4 128.6(10) 2_765 10 ?
 Zr6 Zr4 O11 0.7(9) 2_765 10 ?
 Zr6 Zr4 O4A 57.1(8) 9_765 16 ?
 Zr6 Zr4 O4A 93.5(10) 2_765 13_655 ?
 Zr6 Zr4 O4A 94.6(8) 2_765 6_655 ?
 Zr6 Zr4 O4A 57.1(8) 9_765 6_655 ?
 Zr6 Zr4 O4A 93.5(10) 2_765 7 ?
 Zr6 Zr4 O4A 94.6(8) 2_765 16 ?
 Zr6 Zr4 O4C 126.6(10) 9_765 6_654 ?
 Zr6 Zr4 O4C 88.5(7) 2_765 6_654 ?
 Zr6 Zr4 O4C 88.5(7) 2_765 16_554 ?
 Zr6 Zr4 O4C 126.6(10) 9_765 16_554 ?
 O4 Zr4 Zr6 106.1(10) 4_755 9_765 ?
 O4 Zr4 Zr6 106.1(10) 10 9_765 ?
 O4 Zr4 O4 102.6(19) 10 4_755 ?
 O11 Zr4 Zr4 94.2(8) 10 10 ?
 O11 Zr4 Zr6 61.2(8) 10 9_765 ?
 O11 Zr4 O4 128.7(10) 10 4_755 ?
 O11 Zr4 O4 128.7(10) 10 10 ?
 O4A Zr4 Zr4 80.4(8) 13_655 10 ?
 O4A Zr4 Zr4 80.4(8) 7 10 ?
 O4A Zr4 Zr6 83.6(8) 13_655 9_765 ?
 O4A Zr4 Zr6 83.6(8) 7 9_765 ?
 O4A Zr4 O4A 159.9(18) 7 13_655 ?
 O4A Zr4 O4A 32.8(15) 7 16 ?
 O4A Zr4 O4A 95.1(15) 16 6_655 ?
 O4A Zr4 O4A 127.8(7) 7 6_655 ?
 O4A Zr4 O4A 127.8(7) 13_655 16 ?
 O4A Zr4 O4A 32.8(15) 13_655 6_655 ?
 O4C Zr4 O4C 91(2) 6_654 16_554 ?
 Zr3 Zr5 Zr3 30.5(2) 10 3_565 ?
 Zr3 Zr5 O3 100.6(9) 3_565 10 ?
 Zr3 Zr5 O3 71.3(8) 10 10 ?
 Zr3 Zr5 O10 10.5(8) 10 12_565 ?
 Zr3 Zr5 O15 145.9(8) 3_565 . ?
 Zr3 Zr5 O15 176.4(8) 10 . ?
 Zr3 Zr5 O16 88.5(6) 3_565 . ?
 Zr3 Zr5 O16 85.8(6) 10 . ?
 Zr3 Zr5 O3A 51.7(9) 10 13_655 ?
 Zr3 Zr5 O12A 91.9(6) 10 9_765 ?
 Zr5 Zr5 Zr3 88.14(16) 12_565 10 ?
 Zr5 Zr5 Zr3 57.65(18) 12_565 3_565 ?
 Zr5 Zr5 O3 153.7(13) 12_565 10 ?
 Zr5 Zr5 O10 98.6(8) 12_565 12_565 ?
 Zr5 Zr5 O13 33.1(14) 12_565 3_565 ?
 Zr5 Zr5 O15 88.3(8) 12_565 . ?
 Zr5 Zr5 O16 93.9(8) 12_565 . ?
 Zr5 Zr5 O3A 125.3(8) 12_565 13_655 ?
 Zr5 Zr5 O12A 93.6(7) 12_565 9_765 ?
 Zr5 Zr5 O3C 133.5(11) 12_565 6_654 ?
 O3 Zr5 O15 112.4(11) 10 . ?
 O10 Zr5 Zr3 41.0(7) 12_565 3_565 ?
 O10 Zr5 O3 61.2(12) 12_565 10 ?
 O10 Zr5 O15 173.0(11) 12_565 . ?
 O10 Zr5 O12A 91.5(11) 12_565 9_765 ?
 O13 Zr5 Zr3 121.3(13) 3_565 10 ?
 O13 Zr5 Zr3 163(5) 10 10 ?
 O13 Zr5 Zr3 132(5) 10 3_565 ?
 O13 Zr5 Zr3 90.8(14) 3_565 3_565 ?
 O13 Zr5 Zr5 74(5) 10 12_565 ?
 O13 Zr5 O3 126(5) 10 10 ?
 O13 Zr5 O3 160.7(19) 3_565 10 ?
 O13 Zr5 O10 173(5) 10 12_565 ?
 O13 Zr5 O10 131.8(15) 3_565 12_565 ?
 O13 Zr5 O13 41(6) 10 3_565 ?
 O13 Zr5 O15 14(5) 10 . ?
 O13 Zr5 O15 55.2(15) 3_565 . ?
 O13 Zr5 O16 96(3) 10 . ?
 O13 Zr5 O16 96.0(18) 3_565 . ?
 O13 Zr5 O3A 146.8(19) 3_565 13_655 ?
 O13 Zr5 O3A 141(4) 10 13_655 ?
 O13 Zr5 O12A 89(3) 10 9_765 ?
 O13 Zr5 O12A 91.6(18) 3_565 9_765 ?
 O13 Zr5 O3C 108.3(19) 3_565 6_654 ?
 O13 Zr5 O3C 74(4) 10 6_654 ?
 O16 Zr5 O15 95.2(7) . . ?
 O3A Zr5 Zr3 76.7(8) 13_655 3_565 ?
 O3A Zr5 O15 131.5(11) 13_655 . ?
 O3A Zr5 O16 53.6(11) 13_655 . ?
 O3A Zr5 O12A 119.4(13) 13_655 9_765 ?
 O12A Zr5 Zr3 93.4(4) 9_765 3_565 ?
 O12A Zr5 O3 103.1(17) 9_765 10 ?
 O12A Zr5 O15 87.5(8) 9_765 . ?
 O12A Zr5 O16 172.1(12) 9_765 . ?
 O3C Zr5 Zr3 141.3(14) 6_654 3_565 ?
 O3C Zr5 Zr3 120.7(13) 6_654 10 ?
 O3C Zr5 O15 62.6(14) 6_654 . ?
 O3C Zr5 O12A 118.5(14) 6_654 9_765 ?
 Zr4 Zr6 Zr4 53.5(4) 2_765 9_765 ?
 Zr4 Zr6 Zr6 86.5(3) 2_765 10 ?
 Zr4 Zr6 O9 92.1(5) 9_765 2_765 ?
 Zr4 Zr6 O9 95.7(5) 2_765 12_565 ?
 Zr4 Zr6 O9 95.7(5) 2_765 2_765 ?
 Zr4 Zr6 O9 92.1(5) 9_765 12_565 ?
 Zr4 Zr6 O10 107.6(6) 9_765 . ?
 Zr4 Zr6 O10 123.7(8) 2_765 . ?
 Zr4 Zr6 O10 107.6(6) 9_765 11_755 ?
 Zr4 Zr6 O10 123.7(8) 2_765 11_755 ?
 Zr4 Zr6 O11 100.4(8) 2_765 2_765 ?
 Zr4 Zr6 O12 172.0(11) 2_765 10 ?
 Zr4 Zr6 O4A 51.9(8) 2_765 14 ?
 Zr4 Zr6 O4A 51.9(8) 2_765 8_655 ?
 Zr4 Zr6 O11A 100.2(8) 2_765 9_765 ?
 Zr6 Zr6 Zr4 33.02(19) 10 9_765 ?
 Zr6 Zr6 O9 88.7(5) 10 12_565 ?
 Zr6 Zr6 O9 88.7(5) 10 2_765 ?
 Zr6 Zr6 O10 89.9(5) 10 11_755 ?
 Zr6 Zr6 O10 89.9(5) 10 . ?
 Zr6 Zr6 O11 13.9(8) 10 2_765 ?
 Zr6 Zr6 O4A 80.4(7) 10 14 ?
 Zr6 Zr6 O4A 80.4(7) 10 8_655 ?
 Zr6 Zr6 O11A 173.4(7) 10 9_765 ?
 O9 Zr6 O9 168.1(11) 12_565 2_765 ?
 O9 Zr6 O10 140.4(10) 2_765 . ?
 O9 Zr6 O10 28.0(9) 2_765 11_755 ?
 O9 Zr6 O10 28.0(9) 12_565 . ?
 O9 Zr6 O10 140.4(10) 12_565 11_755 ?
 O10 Zr6 O10 112.4(16) 11_755 . ?
 O11 Zr6 Zr4 46.9(7) 2_765 9_765 ?
 O11 Zr6 O9 87.4(5) 2_765 12_565 ?
 O11 Zr6 O9 87.4(5) 2_765 2_765 ?
 O11 Zr6 O10 82.3(7) 2_765 . ?
 O11 Zr6 O10 82.3(7) 2_765 11_755 ?
 O12 Zr6 Zr4 134.5(11) 10 9_765 ?
 O12 Zr6 Zr6 101.5(10) 10 10 ?
 O12 Zr6 O9 84.6(5) 10 12_565 ?
 O12 Zr6 O9 84.6(5) 10 2_765 ?
 O12 Zr6 O10 57.0(8) 10 . ?
 O12 Zr6 O10 57.0(8) 10 11_755 ?
 O12 Zr6 O11 87.6(10) 10 2_765 ?
 O12 Zr6 O4A 129.0(8) 10 8_655 ?
 O12 Zr6 O4A 129.0(8) 10 14 ?
 O12 Zr6 O11A 71.9(10) 10 9_765 ?
 O4A Zr6 Zr4 61.9(7) 14 9_765 ?
 O4A Zr6 Zr4 61.9(7) 8_655 9_765 ?
 O4A Zr6 O9 44.4(9) 14 2_765 ?
 O4A Zr6 O9 146.1(10) 8_655 2_765 ?
 O4A Zr6 O9 44.4(9) 8_655 12_565 ?
 O4A Zr6 O9 146.1(10) 14 12_565 ?
 O4A Zr6 O4A 101.8(16) 14 8_655 ?
 O11A Zr6 Zr4 153.6(8) 9_765 9_765 ?
 O11A Zr6 O9 90.6(5) 9_765 2_765 ?
 O11A Zr6 O9 90.6(5) 9_765 12_565 ?
 O11A Zr6 O10 86.4(6) 9_765 11_755 ?
 O11A Zr6 O10 86.4(6) 9_765 . ?
 O11A Zr6 O11 159.4(9) 9_765 2_765 ?
 O11A Zr6 O4A 103.6(8) 9_765 14 ?
 O11A Zr6 O4A 103.6(8) 9_765 8_655 ?
 C1 O1 Zr1 132.3(4) . . ?
 C1 O2 Zr2 133.1(4) . 9_666 ?
 Zr3 O3 Zr4 78.9(11) . 10 ?
 Zr3 O3 Zr6 57.9(8) . 9_765 ?
 Zr5 O3 Zr3 43.3(4) 10 . ?
 Zr5 O3 Zr4 96.3(17) 10 10 ?
 Zr5 O3 Zr6 75.8(12) 10 9_765 ?
 Zr6 O3 Zr4 22.1(4) 9_765 10 ?
 O9 O3 Zr3 35.4(9) 10 . ?
 O9 O3 Zr4 57.5(18) 10 10 ?
 O9 O3 Zr5 77.3(13) 10 10 ?
 O9 O3 Zr6 44.7(18) 10 9_765 ?
 O9 O3 C15 104(2) 10 . ?
 C15 O3 Zr3 138(2) . . ?
 C15 O3 Zr4 64(3) . 10 ?
 C15 O3 Zr5 152(5) . 10 ?
 C15 O3 Zr6 86(3) . 9_765 ?
 Zr4 O4 Zr4 42.7(5) 10 . ?
 Zr4 O4 Zr6 46.2(5) . 9_765 ?
 Zr4 O4 Zr6 18.6(3) 10 9_765 ?
 O4 O4 Zr4 51.4(9) 10 . ?
 O4 O4 Zr4 94.1(8) 10 10 ?
 O4 O4 Zr6 94.3(6) 10 9_765 ?
 O4 O4 C15 138(4) 10 . ?
 C15 O4 Zr4 133(2) . . ?
 C15 O4 Zr4 103(3) . 10 ?
 C15 O4 Zr6 91(3) . 9_765 ?
 Zr2 O5 Zr1 109.5(3) . . ?
 Zr2 O5 Zr1 109.5(3) 10_556 . ?
 Zr2 O5 Zr2 113.5(4) . 10_556 ?
 Zr2 O6 Zr1 108.3(2) 2_665 . ?
 Zr2 O6 Zr1 108.3(2) . . ?
 Zr2 O6 Zr2 112.5(3) . 2_665 ?
 Zr3 O9 Zr3 62.8(7) 10 . ?
 Zr3 O9 Zr3 58.8(5) . 3_565 ?
 Zr3 O9 Zr3 4.6(3) 10 3_565 ?
 Zr3 O9 Zr4 105.5(7) . . ?
 Zr3 O9 Zr4 116.7(11) 10 . ?
 Zr3 O9 Zr5 107.8(7) . . ?
 Zr3 O9 Zr5 45.0(6) 10 . ?
 Zr3 O9 Zr6 90.3(10) 10 2_765 ?
 Zr3 O9 O9 99.8(7) 10 10 ?
 Zr3 O9 O4A 153.0(17) 10 13_655 ?
 Zr4 O9 Zr3 119.2(8) . 3_565 ?
 Zr5 O9 Zr3 49.0(4) . 3_565 ?
 Zr5 O9 Zr4 106.0(7) . . ?
 Zr6 O9 Zr3 92.6(8) 2_765 3_565 ?
 Zr6 O9 Zr3 91.3(7) 2_765 . ?
 Zr6 O9 Zr4 26.6(3) 2_765 . ?
 Zr6 O9 Zr5 89.7(7) 2_765 . ?
 O3 O9 Zr3 113.4(15) 10 3_565 ?
 O3 O9 Zr3 110.4(16) 10 10 ?
 O3 O9 Zr3 161(2) 10 . ?
 O3 O9 Zr4 93(2) 10 . ?
 O3 O9 Zr5 67.5(15) 10 . ?
 O3 O9 Zr6 107(3) 10 2_765 ?
 O3 O9 O9 145(2) 10 10 ?
 O9 O9 Zr3 95.7(4) 10 3_565 ?
 O9 O9 Zr3 37.0(5) 10 . ?
 O9 O9 Zr4 89.5(4) 10 . ?
 O9 O9 Zr5 144.8(4) 10 . ?
 O9 O9 Zr6 91.3(5) 10 2_765 ?
 O10 O9 Zr3 55.3(13) 12_565 . ?
 O10 O9 Zr3 5.0(15) 12_565 3_565 ?
 O10 O9 Zr3 7.6(12) 12_565 10 ?
 O10 O9 Zr4 116(2) 12_565 . ?
 O10 O9 Zr5 52.5(13) 12_565 . ?
 O10 O9 Zr6 89.1(19) 12_565 2_765 ?
 O10 O9 O3 118(2) 12_565 10 ?
 O10 O9 O9 92.3(14) 12_565 10 ?
 O3A O9 Zr3 70.6(13) 13_655 10 ?
 O3A O9 Zr3 114.1(16) 13_655 . ?
 O3A O9 Zr3 71.7(13) 13_655 3_565 ?
 O3A O9 Zr4 137.0(19) 13_655 . ?
 O3A O9 Zr5 46.7(16) 13_655 . ?
 O3A O9 Zr6 134(2) 13_655 2_765 ?
 O3A O9 O9 132.6(18) 13_655 10 ?
 O3A O9 O4A 129.3(18) 13_655 13_655 ?
 O3A O9 C15A 69.7(13) 13_655 13_655 ?
 O4A O9 Zr3 154.6(14) 13_655 3_565 ?
 O4A O9 Zr3 112.3(12) 13_655 . ?
 O4A O9 Zr4 36.7(10) 13_655 . ?
 O4A O9 Zr5 130.9(14) 13_655 . ?
 O4A O9 Zr6 62.8(11) 13_655 2_765 ?
 O4A O9 O9 79.6(11) 13_655 10 ?
 C15A O9 Zr3 157(3) 13_655 . ?
 C15A O9 Zr3 138.1(17) 13_655 3_565 ?
 C15A O9 Zr3 135(2) 13_655 10 ?
 C15A O9 Zr4 80.8(18) 13_655 . ?
 C15A O9 Zr5 92(2) 13_655 . ?
 C15A O9 Zr6 102(2) 13_655 2_765 ?
 C15A O9 O9 123(2) 13_655 10 ?
 C15A O9 O4A 59.6(11) 13_655 13_655 ?
 Zr3 O10 Zr3 22(3) 3_565 10 ?
 Zr3 O10 Zr3 63.4(10) 10 . ?
 Zr3 O10 Zr3 85(4) 3_565 . ?
 Zr3 O10 Zr3 110(4) 3_565 12_565 ?
 Zr3 O10 Zr3 25.0(4) 12_565 . ?
 Zr3 O10 Zr3 88.4(13) 10 12_565 ?
 Zr3 O10 Zr5 133.2(13) 12_565 . ?
 Zr3 O10 Zr5 72.9(10) 10 12_565 ?
 Zr3 O10 Zr5 23(3) 3_565 . ?
 Zr3 O10 Zr5 51(3) 3_565 12_565 ?
 Zr3 O10 Zr5 44.8(7) 10 . ?
 Zr3 O10 Zr6 123.1(19) 10 . ?
 Zr3 O10 Zr6 58.9(6) 12_565 10 ?
 Zr3 O10 Zr6 121.7(17) 10 10 ?
 Zr3 O10 Zr6 95.5(9) 12_565 . ?
 Zr3 O10 Zr6 76.2(6) . 10 ?
 Zr3 O10 Zr6 133(5) 3_565 10 ?
 Zr3 O10 Zr6 118(4) 3_565 . ?
 Zr3 O10 O9 151(5) 3_565 12_565 ?
 Zr3 O10 O10 98.5(9) 10 10 ?
 Zr3 O10 O10 31(3) 3_565 12_565 ?
 Zr3 O10 O10 8.5(9) 10 12_565 ?
 Zr3 O10 O10 121(4) 3_565 10 ?
 Zr3 O10 O12 90.2(18) 10 10 ?
 Zr3 O10 O12 87(5) 3_565 10 ?
 Zr5 O10 Zr3 161.3(15) 12_565 12_565 ?
 Zr5 O10 Zr3 108.2(10) . . ?
 Zr5 O10 Zr3 136.3(12) 12_565 . ?
 Zr5 O10 Zr5 28.1(4) 12_565 . ?
 Zr5 O10 Zr6 95.2(9) 12_565 . ?
 Zr5 O10 Zr6 131.9(10) 12_565 10 ?
 Zr5 O10 Zr6 138.8(12) . 10 ?
 Zr5 O10 O12 83.3(12) 12_565 10 ?
 Zr6 O10 Zr3 108.6(10) . . ?
 Zr6 O10 Zr5 109.8(10) . . ?
 Zr6 O10 Zr6 37.0(4) . 10 ?
 O9 O10 Zr3 171(3) 12_565 10 ?
 O9 O10 Zr3 122.5(17) 12_565 . ?
 O9 O10 Zr3 97.7(16) 12_565 12_565 ?
 O9 O10 Zr5 100.8(17) 12_565 12_565 ?
 O9 O10 Zr5 128.7(18) 12_565 . ?
 O9 O10 Zr6 62.9(15) 12_565 . ?
 O9 O10 Zr6 67.2(14) 12_565 10 ?
 O9 O10 O10 173.0(18) 12_565 12_565 ?
 O9 O10 O10 87.7(14) 12_565 10 ?
 O9 O10 O12 95.3(18) 12_565 10 ?
 O10 O10 Zr3 35.1(5) 10 . ?
 O10 O10 Zr3 80.0(8) 12_565 12_565 ?
 O10 O10 Zr3 54.9(5) 12_565 . ?
 O10 O10 Zr3 10.0(8) 10 12_565 ?
 O10 O10 Zr5 143.2(6) 10 . ?
 O10 O10 Zr5 53.2(6) 12_565 . ?
 O10 O10 Zr5 81.4(8) 12_565 12_565 ?
 O10 O10 Zr5 171.3(7) 10 12_565 ?
 O10 O10 Zr6 53.0(4) 10 10 ?
 O10 O10 Zr6 90.0(5) 10 . ?
 O10 O10 Zr6 123.8(8) 12_565 . ?
 O10 O10 Zr6 116.4(6) 12_565 10 ?
 O10 O10 O10 90.002(3) 12_565 10 ?
 O10 O10 O12 91.6(10) 12_565 10 ?
 O10 O10 O12 97.5(9) 10 10 ?
 O12 O10 Zr3 96.9(14) 10 . ?
 O12 O10 Zr3 97.5(14) 10 12_565 ?
 O12 O10 Zr5 85.4(11) 10 . ?
 O12 O10 Zr6 33.0(7) 10 . ?
 O12 O10 Zr6 53.7(7) 10 10 ?
 Zr3 O11 Zr3 116.0(9) 11_755 . ?
 Zr3 O11 Zr3 98.9(8) . 2_765 ?
 Zr3 O11 Zr3 17.2(2) 11_755 2_765 ?
 Zr3 O11 Zr4 113.6(5) 11_755 . ?
 Zr3 O11 Zr4 113.6(5) . . ?
 Zr3 O11 Zr5 35.6(2) . 10 ?
 Zr3 O11 Zr5 108.5(6) 11_755 10 ?
 Zr3 O11 Zr5 35.6(2) 11_755 4_755 ?
 Zr3 O11 Zr5 108.5(6) . 4_755 ?
 Zr4 O11 Zr3 121.9(5) 10 11_755 ?
 Zr4 O11 Zr3 139.1(3) 10 2_765 ?
 Zr4 O11 Zr3 122.7(6) . 2_765 ?
 Zr4 O11 Zr3 121.9(5) 10 . ?
 Zr4 O11 Zr4 44.1(5) 10 . ?
 Zr4 O11 Zr5 137.2(3) . 4_755 ?
 Zr4 O11 Zr5 115.8(9) 10 10 ?
 Zr4 O11 Zr5 115.8(9) 10 4_755 ?
 Zr4 O11 Zr5 137.2(3) . 10 ?
 Zr4 O11 Zr6 71.9(8) 10 2_765 ?
 Zr4 O11 O11 85.8(8) 10 10 ?
 Zr4 O11 O11A 86.4(18) 10 . ?
 Zr5 O11 Zr3 96.3(5) 10 2_765 ?
 Zr5 O11 Zr3 40.3(2) 4_755 2_765 ?
 Zr5 O11 Zr5 83.6(5) 4_755 10 ?
 Zr6 O11 Zr3 122.0(5) 9_765 11_755 ?
 Zr6 O11 Zr3 139.1(3) 9_765 2_765 ?
 Zr6 O11 Zr3 103.5(8) 2_765 2_765 ?
 Zr6 O11 Zr3 101.1(7) 2_765 . ?
 Zr6 O11 Zr3 101.1(7) 2_765 11_755 ?
 Zr6 O11 Zr3 122.0(5) 9_765 . ?
 Zr6 O11 Zr4 27.7(3) 2_765 . ?
 Zr6 O11 Zr4 2(2) 9_765 10 ?
 Zr6 O11 Zr4 42(3) 9_765 . ?
 Zr6 O11 Zr5 117(2) 9_765 10 ?
 Zr6 O11 Zr5 135.3(5) 2_765 4_755 ?
 Zr6 O11 Zr5 135.3(5) 2_765 10 ?
 Zr6 O11 Zr5 117(2) 9_765 4_755 ?
 Zr6 O11 Zr6 70(3) 9_765 2_765 ?
 Zr6 O11 O11 84(3) 9_765 10 ?
 Zr6 O11 O12 171(6) 9_765 2_765 ?
 Zr6 O11 O11A 88(4) 9_765 . ?
 O11 O11 Zr3 93.9(5) 10 . ?
 O11 O11 Zr3 93.0(4) 10 2_765 ?
 O11 O11 Zr3 93.9(5) 10 11_755 ?
 O11 O11 Zr4 41.7(6) 10 . ?
 O11 O11 Zr5 129.5(4) 10 10 ?
 O11 O11 Zr5 129.5(4) 10 4_755 ?
 O11 O11 Zr6 13.9(8) 10 2_765 ?
 O12 O11 Zr3 58.3(6) 2_765 . ?
 O12 O11 Zr3 42.0(7) 2_765 2_765 ?
 O12 O11 Zr3 58.3(6) 2_765 11_755 ?
 O12 O11 Zr4 170(3) 2_765 10 ?
 O12 O11 Zr4 146(3) 2_765 . ?
 O12 O11 Zr5 57.6(14) 2_765 10 ?
 O12 O11 Zr5 57.6(14) 2_765 4_755 ?
 O12 O11 Zr6 118(3) 2_765 2_765 ?
 O12 O11 O11 105(3) 2_765 10 ?
 O12 O11 O11A 83(2) 2_765 . ?
 O11A O11 Zr3 90.2(5) . . ?
 O11A O11 Zr3 92.9(8) . 2_765 ?
 O11A O11 Zr3 90.2(5) . 11_755 ?
 O11A O11 Zr4 130.5(17) . . ?
 O11A O11 Zr5 54.7(5) . 10 ?
 O11A O11 Zr5 54.7(5) . 4_755 ?
 O11A O11 Zr6 158.3(19) . 2_765 ?
 O11A O11 O11 172.2(12) . 10 ?
 Zr3 O12 Zr3 156.4(13) 12_565 2_765 ?
 Zr3 O12 Zr3 131.7(10) 2_765 . ?
 Zr3 O12 Zr3 24.8(3) 12_565 . ?
 Zr3 O12 Zr4 101.4(6) 2_765 9_765 ?
 Zr3 O12 Zr4 101.4(6) 12_565 9_765 ?
 Zr3 O12 Zr6 94.9(5) 12_565 . ?
 Zr3 O12 Zr6 94.9(5) 2_765 . ?
 Zr4 O12 Zr3 125.9(4) 9_765 . ?
 Zr4 O12 Zr6 50.5(4) 9_765 . ?
 Zr6 O12 Zr3 101.2(6) 10 2_765 ?
 Zr6 O12 Zr3 125.3(4) 10 . ?
 Zr6 O12 Zr3 107.1(6) . . ?
 Zr6 O12 Zr3 101.2(6) 10 12_565 ?
 Zr6 O12 Zr4 3.7(5) 10 9_765 ?
 Zr6 O12 Zr6 46.8(7) 10 . ?
 Zr6 O12 O10 90.1(9) 10 10 ?
 Zr6 O12 O10 90.1(9) 10 4_755 ?
 Zr6 O12 O12 168.5(10) 10 2_765 ?
 Zr6 O12 O11A 67.5(11) 10 2_765 ?
 Zr6 O12 O12A 109(2) 10 . ?
 O10 O12 Zr3 35.3(8) 10 . ?
 O10 O12 Zr3 11.7(7) 4_755 2_765 ?
 O10 O12 Zr3 11.7(7) 10 12_565 ?
 O10 O12 Zr3 141.0(13) 4_755 . ?
 O10 O12 Zr3 164.0(16) 4_755 12_565 ?
 O10 O12 Zr3 164.0(16) 10 2_765 ?
 O10 O12 Zr4 90.5(9) 10 9_765 ?
 O10 O12 Zr4 90.5(9) 4_755 9_765 ?
 O10 O12 Zr6 84.5(8) 4_755 . ?
 O10 O12 Zr6 84.5(8) 10 . ?
 O10 O12 O10 164.7(19) 10 4_755 ?
 O11 O12 Zr3 101.0(5) 2_765 2_765 ?
 O11 O12 Zr3 124.8(6) 2_765 . ?
 O11 O12 Zr3 101.0(5) 2_765 12_565 ?
 O11 O12 Zr4 7(2) 2_765 9_765 ?
 O11 O12 Zr6 44(2) 2_765 . ?
 O11 O12 Zr6 3(2) 2_765 10 ?
 O11 O12 O10 89.7(9) 2_765 10 ?
 O11 O12 O10 89.7(9) 2_765 4_755 ?
 O11 O12 O12 165(3) 2_765 2_765 ?
 O11 O12 O11A 71(2) 2_765 2_765 ?
 O11 O12 O12A 112(4) 2_765 . ?
 O12 O12 Zr3 78.3(6) 2_765 2_765 ?
 O12 O12 Zr3 53.5(4) 2_765 . ?
 O12 O12 Zr3 78.3(6) 2_765 12_565 ?
 O12 O12 Zr4 172.2(6) 2_765 9_765 ?
 O12 O12 Zr6 121.7(6) 2_765 . ?
 O12 O12 O10 88.4(10) 2_765 10 ?
 O12 O12 O10 88.4(10) 2_765 4_755 ?
 O12 O12 O11A 124.0(11) 2_765 2_765 ?
 O11A O12 Zr3 110.5(9) 2_765 . ?
 O11A O12 Zr3 97.7(8) 2_765 12_565 ?
 O11A O12 Zr3 97.7(8) 2_765 2_765 ?
 O11A O12 Zr4 63.8(9) 2_765 9_765 ?
 O11A O12 Zr6 114.3(11) 2_765 . ?
 O11A O12 O10 97.1(10) 2_765 10 ?
 O11A O12 O10 97.1(10) 2_765 4_755 ?
 O12A O12 Zr3 90.0(5) . 2_765 ?
 O12A O12 Zr3 90.0(5) . 12_565 ?
 O12A O12 Zr3 86.9(6) . . ?
 O12A O12 Zr4 105.0(16) . 9_765 ?
 O12A O12 Zr6 155.5(17) . . ?
 O12A O12 O10 97.2(8) . 10 ?
 O12A O12 O10 97.2(8) . 4_755 ?
 O12A O12 O12 82.7(12) . 2_765 ?
 O12A O12 O11A 41.3(19) . 2_765 ?
 Zr3 O13 Zr3 24.1(3) . 12_565 ?
 Zr5 O13 Zr3 35.7(5) 3_565 12_565 ?
 Zr5 O13 Zr3 13(4) 10 . ?
 Zr5 O13 Zr3 37(4) 10 12_565 ?
 Zr5 O13 Zr3 59.8(6) 3_565 . ?
 Zr5 O13 Zr5 72(4) 10 3_565 ?
 Zr5 O13 O13 106(5) 10 12_565 ?
 Zr5 O13 O15 168(6) 10 3_565 ?
 Zr5 O13 O15 161(7) 10 10 ?
 Zr5 O13 O15 95(3) 3_565 3_565 ?
 Zr5 O13 O15 127(3) 3_565 10 ?
 Zr5 O13 O3C 136(2) 3_565 13_656 ?
 Zr5 O13 O3C 79(5) 10 13_656 ?
 O13 O13 Zr3 68.8(11) 12_565 12_565 ?
 O13 O13 Zr3 92.9(13) 12_565 . ?
 O13 O13 Zr5 33.1(14) 12_565 3_565 ?
 O13 O13 O15 94(2) 12_565 10 ?
 O13 O13 O15 62.2(16) 12_565 3_565 ?
 O13 O13 O3C 146(2) 12_565 13_656 ?
 O15 O13 Zr3 131(3) 3_565 12_565 ?
 O15 O13 Zr3 162(3) 10 12_565 ?
 O15 O13 Zr3 173(3) 10 . ?
 O15 O13 Zr3 155(3) 3_565 . ?
 O15 O13 O15 31.4(19) 10 3_565 ?
 O3C O13 Zr3 109.9(17) 13_656 12_565 ?
 O3C O13 Zr3 90.0(18) 13_656 . ?
 O3C O13 O15 85(3) 13_656 10 ?
 O3C O13 O15 111(2) 13_656 3_565 ?
 Zr3 O14 Zr3 49.9(3) 12_565 10 ?
 Zr3 O14 Zr3 23.3(2) . 12_565 ?
 Zr3 O14 Zr3 45.5(3) . 10 ?
 Zr3 O14 Zr5 34.4(3) . 10 ?
 Zr3 O14 Zr5 41.4(2) 12_565 10 ?
 Zr3 O14 Zr5 79.9(3) 10 10 ?
 O14 O14 Zr3 87.7(8) 12_565 . ?
 O14 O14 Zr3 95.4(5) 10 12_565 ?
 O14 O14 Zr3 64.3(6) 12_565 12_565 ?
 O14 O14 Zr3 96.0(5) 10 . ?
 O14 O14 Zr3 50.5(3) 10 10 ?
 O14 O14 Zr3 88.2(6) 12_565 10 ?
 O14 O14 Zr5 89.2(6) 12_565 10 ?
 O14 O14 Zr5 130.4(4) 10 10 ?
 O14 O14 O14 89.996(2) 12_565 10 ?
 Zr5 O15 Zr5 26.4(3) . 12_565 ?
 O13 O15 Zr5 21.1(19) 10 12_565 ?
 O13 O15 Zr5 29.5(15) 3_565 . ?
 O13 O15 Zr5 3.1(15) 3_565 12_565 ?
 O13 O15 Zr5 5.3(19) 10 . ?
 O13 O15 O13 24(3) 10 3_565 ?
 O15 O15 Zr5 65.3(6) 12_565 12_565 ?
 O15 O15 Zr5 91.7(8) 12_565 . ?
 O15 O15 O13 86(2) 12_565 10 ?
 O15 O15 O13 62.2(16) 12_565 3_565 ?
 Zr5 O16 Zr3 43.6(3) 12_565 10 ?
 Zr5 O16 Zr3 37.8(3) . 10 ?
 Zr5 O16 Zr5 25.3(3) . 12_565 ?
 O16 O16 Zr3 85.6(7) 12_565 10 ?
 O16 O16 Zr5 86.1(8) 12_565 . ?
 O16 O16 Zr5 60.8(6) 12_565 12_565 ?
 O16 O16 O3A 117.5(10) 12_565 13_655 ?
 O3A O16 Zr3 31.9(6) 13_655 10 ?
 O3A O16 Zr5 68.1(8) 13_655 12_565 ?
 O3A O16 Zr5 49.3(9) 13_655 . ?
 O1 C1 O2 125.9(6) . . ?
 O1 C1 C2 117.2(6) . . ?
 O2 C1 C2 116.9(6) . . ?
 C3 C2 C1 121.0(4) . . ?
 C3 C2 C7 120.0 . . ?
 C7 C2 C1 119.0(4) . . ?
 C4 C3 C2 120.0 . . ?
 C5 C4 C3 120.0 . . ?
 C4 C5 C6 120.0 . . ?
 C4 C5 C8 120.2(4) . . ?
 C6 C5 C8 119.6(4) . . ?
 C7 C6 C5 120.0 . . ?
 C6 C7 C2 120.0 . . ?
 C9 C8 C5 118.4(6) . . ?
 C9 C8 C13 120.0 . . ?
 C13 C8 C5 121.6(6) . . ?
 C9A C8 C5 120.0(6) . . ?
 C9A C8 C13A 120.0(4) . . ?
 C13A C8 C5 119.9(6) . . ?
 C8 C9 C10 120.0 . . ?
 C11 C10 C9 120.0 . . ?
 C10 C11 C14 119.9(5) . . ?
 C12 C11 C10 120.0 . . ?
 C12 C11 C14 120.1(5) . . ?
 C10A C11 C14 120.5(5) . . ?
 C12A C11 C14 119.3(5) . . ?
 C12A C11 C10A 120.1(4) . . ?
 C13 C12 C11 120.0 . . ?
 C12 C13 C8 120.0 . . ?
 C11 C14 C11 112.9(10) 6_665 . ?
 C14 C14 C11 123.5(6) 13_667 6_665 ?
 C14 C14 C11 123.5(4) 13_667 . ?
 Zr4 C15 Zr6 20.2(3) 10 9_765 ?
 O3 C15 Zr4 87(3) . 10 ?
 O3 C15 Zr6 66(3) . 9_765 ?
 O3 C15 C16 126(2) . . ?
 O4 C15 Zr4 44(2) . 10 ?
 O4 C15 Zr6 61(2) . 9_765 ?
 O4 C15 O3 122(3) . . ?
 O4 C15 C16 112(2) . . ?
 C16 C15 Zr4 134(4) . 10 ?
 C16 C15 Zr6 147(4) . 9_765 ?
 C17 C16 C15 122.1(19) . . ?
 C17 C16 C21 120.0 . . ?
 C21 C16 C15 117.5(19) . . ?
 C16 C17 C18 120.0 . . ?
 C19 C18 C17 120.0 . . ?
 C18 C19 C20 120.0 . . ?
 C18 C19 C22 120(2) . . ?
 C20 C19 C22 120(2) . . ?
 C19 C20 C21 120.0 . . ?
 C20 C21 C16 120.0 . . ?
 C23 C22 C19 122(2) . . ?
 C23 C22 C27 120.0 . . ?
 C27 C22 C19 117(2) . . ?
 C22 C23 C24 120.0 . . ?
 C25 C24 C23 120.0 . . ?
 C24 C25 C25 112(3) . 6_655 ?
 C26 C25 C24 120.0 . . ?
 C26 C25 C25 117(4) . 6_655 ?
 C25 C26 C27 120.0 . . ?
 C26 C27 C22 120.0 . . ?
 C28 C28 C29 55.5(9) 6_655 13_656 ?
 C28 C28 C29 90.3(11) 6_655 . ?
 C29 C28 C29 34.9(14) . 13_656 ?
 C28 C29 C28 177(7) 10_556 . ?
 C28 C29 C28 110.9(17) 13_656 6_655 ?
 C28 C29 C28 34.2(16) . 6_655 ?
 C28 C29 C28 34.2(16) 10_556 13_656 ?
 C28 C29 C28 145.1(14) . 13_656 ?
 C28 C29 C28 145.1(14) 10_556 6_655 ?
 C29 C29 C28 55.5(9) 13_656 13_656 ?
 C29 C29 C28 89.6(15) 13_656 10_556 ?
 C29 C29 C28 55.5(9) 13_656 6_655 ?
 C29 C29 C28 89.6(15) 13_656 . ?
 Zr3 O3A Zr3 17.5(4) 6_655 15_645 ?
 Zr3 O3A Zr5 60.9(9) 6_655 13_655 ?
 Zr3 O3A Zr5 39.5(4) 15_645 8_645 ?
 Zr3 O3A Zr5 50.0(8) 6_655 8_645 ?
 Zr3 O3A Zr6 57.9(9) 6_655 14_445 ?
 Zr3 O3A Zr6 74.7(7) 15_645 14_445 ?
 Zr3 O3A O16 106.7(15) 6_655 13_655 ?
 Zr5 O3A Zr3 55.7(6) 13_655 15_645 ?
 Zr5 O3A Zr5 20.6(3) 13_655 8_645 ?
 Zr5 O3A Zr6 77.9(9) 13_655 14_445 ?
 Zr5 O3A Zr6 86.2(7) 8_645 14_445 ?
 Zr5 O3A O16 77.1(13) 13_655 13_655 ?
 O9 O3A Zr3 63.6(15) 13_655 6_655 ?
 O9 O3A Zr3 80.6(14) 13_655 15_645 ?
 O9 O3A Zr5 105(2) 13_655 13_655 ?
 O9 O3A Zr5 107.7(17) 13_655 8_645 ?
 O9 O3A Zr6 30.1(14) 13_655 14_445 ?
 O9 O3A O16 165(2) 13_655 13_655 ?
 O9 O3A C15A 60.0(19) 13_655 . ?
 O16 O3A Zr3 89.3(12) 13_655 15_645 ?
 O16 O3A Zr5 69.4(11) 13_655 8_645 ?
 O16 O3A Zr6 154.8(15) 13_655 14_445 ?
 C15A O3A Zr3 137(2) . 15_645 ?
 C15A O3A Zr3 120(2) . 6_655 ?
 C15A O3A Zr5 137(3) . 8_645 ?
 C15A O3A Zr5 117(3) . 13_655 ?
 C15A O3A Zr6 63(2) . 14_445 ?
 C15A O3A O16 132(2) . 13_655 ?
 Zr4 O4A Zr3 93.8(11) 13_655 6_655 ?
 Zr4 O4A Zr3 101.2(8) 6_655 6_655 ?
 Zr4 O4A Zr4 51.9(7) 13_655 6_655 ?
 Zr4 O4A Zr6 27.4(3) 6_655 5_445 ?
 Zr4 O4A Zr6 57.1(6) 13_655 5_445 ?
 Zr4 O4A Zr6 34.6(6) 13_655 14_445 ?
 Zr6 O4A Zr3 59.6(7) 14_445 6_655 ?
 Zr6 O4A Zr3 73.9(6) 5_445 6_655 ?
 Zr6 O4A Zr4 61.0(6) 14_445 6_655 ?
 Zr6 O4A Zr6 46.6(5) 14_445 5_445 ?
 O9 O4A Zr3 13.2(9) 13_655 6_655 ?
 O9 O4A Zr4 106.7(17) 13_655 13_655 ?
 O9 O4A Zr4 111.1(13) 13_655 6_655 ?
 O9 O4A Zr6 83.8(11) 13_655 5_445 ?
 O9 O4A Zr6 72.7(13) 13_655 14_445 ?
 O4A O4A Zr3 100.4(4) 10 6_655 ?
 O4A O4A Zr4 47.7(8) 10 6_655 ?
 O4A O4A Zr4 99.6(8) 10 13_655 ?
 O4A O4A Zr6 53.0(6) 10 5_445 ?
 O4A O4A Zr6 99.6(7) 10 14_445 ?
 O4A O4A O9 100.4(11) 10 13_655 ?
 O4A O4A C15A 134(3) 10 . ?
 C15A O4A Zr3 62.2(15) . 6_655 ?
 C15A O4A Zr4 163(2) . 6_655 ?
 C15A O4A Zr4 123(3) . 13_655 ?
 C15A O4A Zr6 105(3) . 14_445 ?
 C15A O4A Zr6 136(2) . 5_445 ?
 C15A O4A O9 53.0(16) . 13_655 ?
 Zr3 O11A Zr3 84.2(4) 11_755 . ?
 Zr4 O11A Zr3 80.6(6) 10 . ?
 Zr4 O11A Zr3 80.6(6) 10 11_755 ?
 Zr4 O11A Zr5 112.0(6) 10 10 ?
 Zr4 O11A Zr5 112.0(6) 10 4_755 ?
 Zr5 O11A Zr3 106.7(6) 10 11_755 ?
 Zr5 O11A Zr3 36.4(2) 10 . ?
 Zr5 O11A Zr3 106.7(6) 4_755 . ?
 Zr5 O11A Zr3 36.4(2) 4_755 11_755 ?
 Zr5 O11A Zr5 109.3(10) 4_755 10 ?
 Zr6 O11A Zr3 60.7(4) 9_765 11_755 ?
 Zr6 O11A Zr3 60.7(4) 9_765 . ?
 Zr6 O11A Zr4 28.5(5) 9_765 10 ?
 Zr6 O11A Zr5 96.8(5) 9_765 10 ?
 Zr6 O11A Zr5 96.8(5) 9_765 4_755 ?
 Zr6 O11A O12 40.7(6) 9_765 2_765 ?
 O11 O11A Zr3 52.2(4) . . ?
 O11 O11A Zr3 52.2(4) . 11_755 ?
 O11 O11A Zr4 43.0(11) . 10 ?
 O11 O11A Zr5 88.5(6) . 10 ?
 O11 O11A Zr5 88.5(6) . 4_755 ?
 O11 O11A Zr6 14.5(8) . 9_765 ?
 O11 O11A O12 26.2(11) . 2_765 ?
 O12 O11A Zr3 42.7(2) 2_765 . ?
 O12 O11A Zr3 42.7(2) 2_765 11_755 ?
 O12 O11A Zr4 69.2(10) 2_765 10 ?
 O12 O11A Zr5 73.8(6) 2_765 10 ?
 O12 O11A Zr5 73.8(6) 2_765 4_755 ?
 O12A O11A Zr3 66.4(6) 2_765 11_755 ?
 O12A O11A Zr3 66.4(6) 2_765 . ?
 O12A O11A Zr4 134.7(14) 2_765 10 ?
 O12A O11A Zr5 54.8(5) 2_765 4_755 ?
 O12A O11A Zr5 54.8(5) 2_765 10 ?
 O12A O11A Zr6 106.2(12) 2_765 9_765 ?
 O12A O11A O11 91.7(11) 2_765 . ?
 O12A O11A O12 65.5(10) 2_765 2_765 ?
 Zr3 O12A Zr3 83.5(4) 11_755 . ?
 Zr3 O12A Zr3 20.71(17) 12_565 . ?
 Zr3 O12A Zr3 20.71(17) 2_765 11_755 ?
 Zr3 O12A Zr3 93.9(6) 12_565 2_765 ?
 Zr3 O12A Zr3 92.1(5) 12_565 11_755 ?
 Zr3 O12A Zr3 92.1(5) 2_765 . ?
 Zr5 O12A Zr3 47.5(2) 4_755 2_765 ?
 Zr5 O12A Zr3 44.2(3) 3_565 . ?
 Zr5 O12A Zr3 134.0(8) 9_765 12_565 ?
 Zr5 O12A Zr3 47.5(2) 10 12_565 ?
 Zr5 O12A Zr3 40.3(3) 3_565 12_565 ?
 Zr5 O12A Zr3 127.6(6) 3_565 11_755 ?
 Zr5 O12A Zr3 134.0(8) 3_565 2_765 ?
 Zr5 O12A Zr3 44.2(3) 9_765 11_755 ?
 Zr5 O12A Zr3 127.6(6) 9_765 . ?
 Zr5 O12A Zr3 108.1(6) 10 11_755 ?
 Zr5 O12A Zr3 108.1(6) 4_755 . ?
 Zr5 O12A Zr3 36.2(2) 4_755 11_755 ?
 Zr5 O12A Zr3 123.5(6) 4_755 12_565 ?
 Zr5 O12A Zr3 40.3(3) 9_765 2_765 ?
 Zr5 O12A Zr3 123.5(6) 10 2_765 ?
 Zr5 O12A Zr3 36.2(2) 10 . ?
 Zr5 O12A Zr5 171.2(10) 3_565 9_765 ?
 Zr5 O12A Zr5 29.2(3) 9_765 4_755 ?
 Zr5 O12A Zr5 143.3(11) 3_565 4_755 ?
 Zr5 O12A Zr5 29.2(3) 3_565 10 ?
 Zr5 O12A Zr5 143.3(11) 9_765 10 ?
 Zr5 O12A Zr5 114.2(10) 10 4_755 ?
 Zr5 O12A Zr6 106.9(6) 4_755 10 ?
 Zr5 O12A Zr6 90.1(8) 3_565 10 ?
 Zr5 O12A Zr6 90.1(8) 9_765 10 ?
 Zr5 O12A Zr6 106.9(6) 10 10 ?
 Zr6 O12A Zr3 59.5(5) 10 12_565 ?
 Zr6 O12A Zr3 59.5(5) 10 2_765 ?
 Zr6 O12A Zr3 75.3(5) 10 . ?
 Zr6 O12A Zr3 75.3(5) 10 11_755 ?
 O12 O12A Zr3 55.8(5) . . ?
 O12 O12A Zr3 55.8(5) . 11_755 ?
 O12 O12A Zr3 48.3(3) . 2_765 ?
 O12 O12A Zr3 48.3(3) . 12_565 ?
 O12 O12A Zr5 91.8(6) . 10 ?
 O12 O12A Zr5 87.9(6) . 3_565 ?
 O12 O12A Zr5 91.8(6) . 4_755 ?
 O12 O12A Zr5 87.9(6) . 9_765 ?
 O12 O12A Zr6 29.0(10) . 10 ?
 O11A O12A Zr3 107.9(13) 2_765 11_755 ?
 O11A O12A Zr3 87.3(13) 2_765 12_565 ?
 O11A O12A Zr3 87.3(13) 2_765 2_765 ?
 O11A O12A Zr3 107.9(13) 2_765 . ?
 O11A O12A Zr5 121.9(7) 2_765 10 ?
 O11A O12A Zr5 93.1(8) 2_765 9_765 ?
 O11A O12A Zr5 121.9(7) 2_765 4_755 ?
 O11A O12A Zr5 93.1(8) 2_765 3_565 ?
 O11A O12A Zr6 44.2(14) 2_765 10 ?
 O11A O12A O12 73(2) 2_765 . ?
 O11A O12A O12A 170.5(13) 2_765 2_765 ?
 O12A O12A Zr3 65.4(5) 2_765 11_755 ?
 O12A O12A Zr3 86.1(5) 2_765 2_765 ?
 O12A O12A Zr3 86.1(5) 2_765 12_565 ?
 O12A O12A Zr3 65.4(5) 2_765 . ?
 O12A O12A Zr5 86.4(7) 2_765 3_565 ?
 O12A O12A Zr5 57.2(5) 2_765 4_755 ?
 O12A O12A Zr5 86.4(7) 2_765 9_765 ?
 O12A O12A Zr5 57.2(5) 2_765 10 ?
 O12A O12A Zr6 126.3(4) 2_765 10 ?
 O12A O12A O12 97.3(12) 2_765 . ?
 C8 C9A C10A 120.1(5) . . ?
 C9A C10A C11 119.9(5) . . ?
 C11 C12A C13A 119.9(5) . . ?
 C8 C13A C12A 120.0(5) . . ?
 Zr3 C15A Zr4 81.6(11) 6_655 13_655 ?
 Zr3 C15A Zr5 37.2(5) 6_655 13_655 ?
 Zr3 C15A Zr6 57.9(8) 6_655 14_445 ?
 Zr4 C15A Zr5 92.5(16) 13_655 13_655 ?
 Zr4 C15A Zr6 24.0(4) 13_655 14_445 ?
 Zr6 C15A Zr5 71.0(12) 14_445 13_655 ?
 O9 C15A Zr3 23.7(11) 13_655 6_655 ?
 O9 C15A Zr4 69.0(17) 13_655 13_655 ?
 O9 C15A Zr5 60.0(17) 13_655 13_655 ?
 O9 C15A Zr6 49.2(17) 13_655 14_445 ?
 O9 C15A O3A 50.3(17) 13_655 . ?
 O9 C15A O4A 67.5(18) 13_655 . ?
 O9 C15A C16A 174(4) 13_655 . ?
 O3A C15A Zr3 31.3(14) . 6_655 ?
 O3A C15A Zr4 112(2) . 13_655 ?
 O3A C15A Zr5 36(2) . 13_655 ?
 O3A C15A Zr6 88(2) . 14_445 ?
 O3A C15A C16A 126(2) . . ?
 O4A C15A Zr3 88.5(17) . 6_655 ?
 O4A C15A Zr4 29.7(18) . 13_655 ?
 O4A C15A Zr5 114(3) . 13_655 ?
 O4A C15A Zr6 44.1(18) . 14_445 ?
 O4A C15A O3A 118(3) . . ?
 O4A C15A C16A 116.0(19) . . ?
 C16A C15A Zr3 150(2) . 6_655 ?
 C16A C15A Zr4 111(2) . 13_655 ?
 C16A C15A Zr5 114(2) . 13_655 ?
 C16A C15A Zr6 129(3) . 14_445 ?
 C17A C16A C15A 119(2) . . ?
 C17A C16A C21A 120.0 . . ?
 C21A C16A C15A 121(2) . . ?
 C18A C17A C16A 120.0 . . ?
 C19A C18A C17A 120.0 . . ?
 C18A C19A C20A 120.0 . . ?
 C18A C19A C22A 119(2) . . ?
 C20A C19A C22A 120(2) . . ?
 C21A C20A C19A 120.0 . . ?
 C20A C21A C16A 120.0 . . ?
 C23A C22A C19A 119(2) . . ?
 C23A C22A C27A 120.0 . . ?
 C27A C22A C19A 121(2) . . ?
 C24A C23A C22A 120.0 . . ?
 C23A C24A C25A 120.0 . . ?
 C26A C25A C24A 120.0 . . ?
 C25A C26A C27A 120.0 . . ?
 C26A C27A C22A 120.0 . . ?
 Zr4 O3B Zr6 19.4(3) 1_556 2_766 ?
 C15B O3B Zr4 137(2) . 1_556 ?
 C15B O3B Zr6 118.6(19) . 2_766 ?
 C15B O4B Zr5 136.6(19) . 1_556 ?
 O3B C15B O4B 118(3) . . ?
 O3B C15B C16B 118(2) . . ?
 O4B C15B C16B 123(2) . . ?
 C17B C16B C15B 119(2) . . ?
 C17B C16B C21B 120.0 . . ?
 C21B C16B C15B 121(2) . . ?
 C16B C17B C18B 120.0 . . ?
 C19B C18B C17B 120.0 . . ?
 C18B C19B C22B 116(2) . . ?
 C20B C19B C18B 120.0 . . ?
 C20B C19B C22B 124(2) . . ?
 C19B C20B C21B 120.0 . . ?
 C20B C21B C16B 120.0 . . ?
 C23B C22B C19B 118(2) . . ?
 C23B C22B C27B 120.0 . . ?
 C27B C22B C19B 122(2) . . ?
 C24B C23B C22B 120.0 . . ?
 C25B C24B C23B 120.0 . . ?
 C24B C25B C25B 124.0 . 10_556 ?
 C24B C25B C25B 107(3) . 6_655 ?
 C24B C25B C26B 138.17(8) . 10_556 ?
 C24B C25B C26B 120.0 . . ?
 C25B C25B C25B 90.0 10_556 6_655 ?
 C25B C25B C26B 113(2) 6_655 10_556 ?
 C25B C25B C26B 45.1(10) 10_556 10_556 ?
 C26B C25B C25B 89.4 . 10_556 ?
 C26B C25B C25B 123(4) . 6_655 ?
 C26B C25B C26B 44.3(10) . 10_556 ?
 C27B C26B C25B 120.0 . . ?
 C26B C27B C22B 120.0 . . ?
 Zr5 O3C Zr3 32.7(8) 6_656 13_656 ?
 Zr5 O3C Zr3 46.4(4) 15_646 13_656 ?
 Zr5 O3C Zr5 20.6(4) 6_656 15_646 ?
 Zr5 O3C C15C 121(2) 6_656 . ?
 O13 O3C Zr3 59.4(11) 13_656 13_656 ?
 O13 O3C Zr5 20.0(14) 13_656 15_646 ?
 O13 O3C Zr5 26.9(7) 13_656 6_656 ?
 O13 O3C C15C 133(4) 13_656 . ?
 C15C O3C Zr3 103.5(18) . 13_656 ?
 C15C O3C Zr5 141(2) . 15_646 ?
 Zr4 O4C Zr5 102.5(7) 6_656 6_656 ?
 Zr4 O4C Zr6 27.6(3) 6_656 5_446 ?
 Zr6 O4C Zr5 74.9(6) 5_446 6_656 ?
 C15C O4C Zr4 163(2) . 6_656 ?
 C15C O4C Zr5 61.6(14) . 6_656 ?
 C15C O4C Zr6 136(2) . 5_446 ?
 O3C C15C Zr5 29.6(13) . 6_656 ?
 O3C C15C O4C 117(2) . . ?
 O3C C15C C16C 124(2) . . ?
 O4C C15C Zr5 87.8(16) . 6_656 ?
 O4C C15C C16C 119(2) . . ?
 C16C C15C Zr5 149(2) . 6_656 ?
 C17C C16C C15C 119.0(18) . . ?
 C17C C16C C21C 120.0 . . ?
 C21C C16C C15C 120.8(19) . . ?
 C18C C17C C16C 120.0 . . ?
 C19C C18C C17C 120.0 . . ?
 C18C C19C C20C 120.0 . . ?
 C18C C19C C22C 121(2) . . ?
 C20C C19C C22C 119(2) . . ?
 C21C C20C C19C 120.0 . . ?
 C20C C21C C16C 120.0 . . ?
 C23C C22C C19C 119(2) . . ?
 C23C C22C C27C 120.0 . . ?
 C27C C22C C19C 121(2) . . ?
 C22C C23C C24C 120.0 . . ?
 C23C C24C C25C 136.99(6) . 10_556 ?
 C25C C24C C23C 120.0 . . ?
 C25C C24C C25C 43.9(10) . 10_556 ?
 C24C C25C C24C 49.0(11) . 10_556 ?
 C24C C25C C25C 92.6 . 10_556 ?
 C25C C25C C24C 43.5(11) 10_556 10_556 ?
 C26C C25C C24C 120.0 . . ?
 C26C C25C C24C 137.0 . 10_556 ?
 C26C C25C C25C 120.8 . 10_556 ?
 C25C C26C C27C 120.0 . . ?
 C26C C27C C22C 120.0 . . ?

_shelx_fab_file
;
 0 0 2 532.28 0.00
 0 0 3 -83.16 0.00
 0 0 10 -25.37 0.00
 0 0 11 0.66 0.00
 0 0 12 -5.42 0.00
 0 0 13 8.33 0.00
 0 0 14 -6.47 0.00
 0 0 15 -18.65 0.00
 0 0 16 12.80 0.00
 0 0 17 1.58 0.00
 0 0 18 11.52 0.00
 0 2 2 49.61 0.00
 0 2 3 -122.14 0.00
 0 2 4 -58.60 0.00
 0 2 5 14.17 0.00
 0 2 6 -13.14 0.00
 0 2 9 -15.08 0.00
 0 2 10 -18.17 0.00
 0 2 11 3.89 0.00
 0 2 12 5.28 0.00
 0 2 13 9.14 0.00
 0 2 14 -5.12 0.00
 0 2 15 -8.71 0.00
 0 2 16 2.62 0.00
 0 2 17 -1.32 0.00
 0 2 18 2.60 0.00
 0 2 19 1.23 0.00
 0 4 1 22.46 0.00
 0 4 2 -270.78 0.00
 0 4 3 57.06 0.00
 0 4 4 -132.12 0.00
 0 4 5 42.78 0.00
 0 4 6 -37.05 0.00
 0 4 7 -10.68 0.00
 0 4 9 -17.27 0.00
 0 4 10 2.86 0.00
 0 4 11 12.62 0.00
 0 4 12 11.74 0.00
 0 4 13 10.30 0.00
 0 4 14 1.46 0.00
 0 4 15 -6.34 0.00
 0 4 16 -2.30 0.00
 0 4 17 6.07 0.00
 0 4 18 0.00 0.00
 0 4 19 1.11 0.00
 0 6 1 -7.49 0.00
 0 6 2 -53.03 0.00
 0 6 3 -50.12 0.00
 0 6 4 -14.50 0.00
 0 6 5 23.94 0.00
 0 6 6 23.41 0.00
 0 6 7 -21.62 0.00
 0 6 8 4.36 0.00
 0 6 9 -1.79 0.00
 0 6 10 -2.73 0.00
 0 6 11 5.67 0.00
 0 6 12 10.86 0.00
 0 6 13 6.00 0.00
 0 6 14 4.67 0.00
 0 6 15 0.30 0.00
 0 6 16 -9.82 0.00
 0 6 17 1.10 0.00
 0 6 18 2.83 0.00
 0 6 19 -1.46 0.00
 0 6 20 -2.62 0.00
 0 8 1 -17.29 0.00
 0 8 2 -62.70 0.00
 0 8 3 -1.20 0.00
 0 8 4 38.93 0.00
 0 8 5 6.07 0.00
 0 8 6 33.78 0.00
 0 8 7 13.47 0.00
 0 8 8 -4.89 0.00
 0 8 9 11.61 0.00
 0 8 10 8.53 0.00
 0 8 11 2.07 0.00
 0 8 12 -5.27 0.00
 0 8 13 -7.32 0.00
 0 8 14 5.21 0.00
 0 8 15 -5.66 0.00
 0 8 16 -7.19 0.00
 0 8 17 -5.36 0.00
 0 8 18 0.25 0.00
 0 8 19 -1.19 0.00
 0 8 20 -4.82 0.00
 0 10 1 14.00 0.00
 0 10 2 102.51 0.00
 0 10 3 -19.02 0.00
 0 10 4 57.84 0.00
 0 10 5 32.65 0.00
 0 10 6 38.57 0.00
 0 10 7 16.89 0.00
 0 10 8 -8.54 0.00
 0 10 9 -1.35 0.00
 0 10 10 -1.72 0.00
 0 10 11 -0.12 0.00
 0 10 12 -1.41 0.00
 0 10 13 -2.82 0.00
 0 10 14 3.30 0.00
 0 10 15 6.22 0.00
 0 10 16 -7.40 0.00
 0 10 17 -0.09 0.00
 0 10 18 5.27 0.00
 0 10 19 3.68 0.00
 0 12 0 -77.65 0.00
 0 12 1 32.32 0.00
 0 12 2 26.98 0.00
 0 12 3 35.82 0.00
 0 12 4 44.52 0.00
 0 12 5 -15.00 0.00
 0 12 6 1.64 0.00
 0 12 7 7.61 0.00
 0 12 8 -1.74 0.00
 0 12 9 -1.28 0.00
 0 12 10 15.06 0.00
 0 12 11 -6.17 0.00
 0 12 12 -0.65 0.00
 0 12 13 -2.79 0.00
 0 12 14 5.31 0.00
 0 12 15 7.53 0.00
 0 12 16 -4.45 0.00
 0 12 17 2.19 0.00
 0 12 18 -0.69 0.00
 0 12 19 5.96 0.00
 0 14 0 -14.71 0.00
 0 14 1 25.42 0.00
 0 14 2 32.72 0.00
 0 14 3 -19.84 0.00
 0 14 4 18.93 0.00
 0 14 5 -1.11 0.00
 0 14 6 -8.20 0.00
 0 14 7 -6.83 0.00
 0 14 8 14.18 0.00
 0 14 9 -9.29 0.00
 0 14 10 4.00 0.00
 0 14 11 0.67 0.00
 0 14 12 3.42 0.00
 0 14 13 -2.98 0.00
 0 14 14 5.16 0.00
 0 14 15 7.28 0.00
 0 14 16 1.62 0.00
 0 14 17 -3.04 0.00
 0 14 18 -5.73 0.00
 0 14 19 2.97 0.00
 0 16 0 18.08 0.00
 0 16 1 -6.92 0.00
 0 16 2 26.23 0.00
 0 16 3 14.78 0.00
 0 16 4 35.25 0.00
 0 16 5 2.47 0.00
 0 16 6 -12.32 0.00
 0 16 7 -16.50 0.00
 0 16 8 12.13 0.00
 0 16 9 -5.80 0.00
 0 16 10 -4.55 0.00
 0 16 11 2.00 0.00
 0 16 12 -1.54 0.00
 0 16 13 1.12 0.00
 0 16 14 -5.80 0.00
 0 16 15 0.33 0.00
 0 16 16 4.42 0.00
 0 16 17 -2.81 0.00
 0 16 18 3.97 0.00
 0 16 19 -1.66 0.00
 0 18 0 -3.11 0.00
 0 18 1 -1.90 0.00
 0 18 2 -6.55 0.00
 0 18 3 -7.29 0.00
 0 18 4 -13.61 0.00
 0 18 5 21.34 0.00
 0 18 6 -40.03 0.00
 0 18 7 -7.62 0.00
 0 18 8 2.16 0.00
 0 18 9 4.53 0.00
 0 18 10 -6.56 0.00
 0 18 11 4.93 0.00
 0 18 12 2.33 0.00
 0 18 14 5.21 0.00
 0 18 15 -0.44 0.00
 0 18 16 8.49 0.00
 0 18 17 -2.79 0.00
 0 18 18 3.35 0.00
 0 20 0 18.09 0.00
 0 20 1 -11.57 0.00
 0 20 2 -10.09 0.00
 0 20 3 10.33 0.00
 0 20 4 -10.71 0.00
 0 20 5 13.55 0.00
 0 20 6 -16.24 0.00
 0 20 7 11.15 0.00
 0 20 8 5.89 0.00
 0 20 9 6.30 0.00
 0 20 10 -4.02 0.00
 0 20 11 8.34 0.00
 0 20 12 -3.68 0.00
 0 20 13 -1.55 0.00
 0 20 14 -3.25 0.00
 0 20 15 -4.02 0.00
 0 20 16 -0.19 0.00
 0 20 17 -2.97 0.00
 0 20 18 -2.55 0.00
 0 22 0 1.12 0.00
 0 22 1 8.29 0.00
 0 22 2 10.08 0.00
 0 22 3 15.22 0.00
 0 22 4 -2.08 0.00
 0 22 5 13.77 0.00
 0 22 6 4.41 0.00
 0 22 7 -1.17 0.00
 0 22 8 16.36 0.00
 0 22 9 1.14 0.00
 0 22 10 2.15 0.00
 0 22 11 2.50 0.00
 0 22 12 -6.75 0.00
 0 22 13 -4.48 0.00
 0 22 14 -0.05 0.00
 0 22 15 -2.71 0.00
 0 22 16 -1.21 0.00
 0 22 17 -2.77 0.00
 0 22 18 -2.25 0.00
 0 24 0 -2.28 0.00
 0 24 1 -1.99 0.00
 0 24 2 -3.19 0.00
 0 24 3 5.49 0.00
 0 24 4 0.86 0.00
 0 24 5 0.06 0.00
 0 24 6 10.71 0.00
 0 24 7 8.26 0.00
 0 24 8 3.39 0.00
 0 24 9 -3.61 0.00
 0 24 10 -5.32 0.00
 0 24 11 -0.93 0.00
 0 24 12 -5.87 0.00
 0 24 13 -0.53 0.00
 0 24 14 5.03 0.00
 0 24 15 1.82 0.00
 0 24 16 -5.02 0.00
 0 24 17 -1.23 0.00
 0 26 0 -14.30 0.00
 0 26 1 -6.31 0.00
 0 26 2 -0.76 0.00
 0 26 3 3.72 0.00
 0 26 4 -13.46 0.00
 0 26 5 1.64 0.00
 0 26 6 11.60 0.00
 0 26 7 5.77 0.00
 0 26 8 6.46 0.00
 0 26 9 -7.61 0.00
 0 26 10 1.21 0.00
 0 26 11 -1.16 0.00
 0 26 12 -1.83 0.00
 0 26 13 0.67 0.00
 0 26 14 2.58 0.00
 0 26 15 2.18 0.00
 0 26 16 -1.97 0.00
 0 26 17 -6.07 0.00
 0 28 0 -4.66 0.00
 0 28 1 -0.45 0.00
 0 28 2 -6.34 0.00
 0 28 3 -7.24 0.00
 0 28 4 -10.11 0.00
 0 28 5 -6.87 0.00
 0 28 6 11.76 0.00
 0 28 7 8.24 0.00
 0 28 8 -3.14 0.00
 0 28 9 -3.10 0.00
 0 28 10 -0.53 0.00
 0 28 11 -0.55 0.00
 0 28 12 -0.55 0.00
 0 28 13 4.74 0.00
 0 28 14 -2.30 0.00
 0 28 15 -1.22 0.00
 0 28 16 0.93 0.00
 0 30 0 7.20 0.00
 0 30 1 -12.28 0.00
 0 30 2 9.33 0.00
 0 30 3 -3.48 0.00
 0 30 4 -5.47 0.00
 0 30 5 -7.91 0.00
 0 30 6 3.84 0.00
 0 30 7 10.12 0.00
 0 30 8 -4.48 0.00
 0 30 9 -2.72 0.00
 0 30 10 -2.11 0.00
 0 30 11 -1.81 0.00
 0 30 12 3.33 0.00
 0 30 13 2.16 0.00
 0 30 14 2.30 0.00
 0 30 15 -2.52 0.00
 0 30 16 8.58 0.00
 0 32 0 8.35 0.00
 0 32 1 -0.83 0.00
 0 32 2 5.55 0.00
 0 32 3 7.77 0.00
 0 32 4 -3.84 0.00
 0 32 5 -0.49 0.00
 0 32 6 7.80 0.00
 0 32 7 4.07 0.00
 0 32 8 0.74 0.00
 0 32 9 1.13 0.00
 0 32 10 -2.01 0.00
 0 32 11 -4.49 0.00
 0 32 12 -5.28 0.00
 0 32 14 0.63 0.00
 0 32 15 -7.98 0.00
 0 34 0 3.61 0.00
 0 34 1 8.50 0.00
 0 34 2 7.83 0.00
 0 34 3 6.26 0.00
 0 34 4 3.25 0.00
 0 34 5 -3.90 0.00
 0 34 6 -2.59 0.00
 0 34 7 4.91 0.00
 0 34 8 0.68 0.00
 0 34 9 4.20 0.00
 0 34 10 3.45 0.00
 0 34 11 -5.22 0.00
 0 34 12 -2.13 0.00
 0 34 14 4.25 0.00
 0 36 0 1.82 0.00
 0 36 1 -0.30 0.00
 0 36 2 2.27 0.00
 0 36 3 5.50 0.00
 0 36 4 -1.08 0.00
 0 36 5 -1.87 0.00
 0 36 6 -7.19 0.00
 0 36 7 -5.50 0.00
 0 36 8 0.41 0.00
 0 36 9 3.65 0.00
 0 36 10 2.99 0.00
 0 36 11 -4.78 0.00
 0 36 12 -0.39 0.00
 0 38 0 -2.46 0.00
 0 38 1 0.45 0.00
 0 38 2 0.64 0.00
 0 38 3 0.49 0.00
 0 38 4 -1.65 0.00
 0 38 5 -0.68 0.00
 0 38 6 -6.39 0.00
 0 38 7 -4.07 0.00
 0 38 8 -0.82 0.00
 0 38 9 -2.65 0.00
 0 38 10 1.95 0.00
 0 38 11 -3.80 0.00
 0 38 13 -8.17 0.00
 0 40 0 4.90 0.00
 0 40 1 2.07 0.00
 0 40 2 -3.19 0.00
 0 40 3 0.14 0.00
 0 40 4 1.97 0.00
 0 40 5 1.37 0.00
 0 40 6 0.44 0.00
 0 40 7 -4.88 0.00
 0 40 8 -1.04 0.00
 0 40 9 2.62 0.00
 0 40 10 -0.07 0.00
 0 40 11 -0.25 0.00
 0 42 0 -4.39 0.00
 0 42 1 -0.64 0.00
 0 42 2 -0.29 0.00
 0 42 3 -0.06 0.00
 0 42 4 -0.52 0.00
 0 42 5 3.56 0.00
 0 42 6 -2.83 0.00
 0 42 7 -2.22 0.00
 0 42 8 0.07 0.00
 0 42 9 0.91 0.00
 0 42 10 1.32 0.00
 0 44 0 -0.65 0.00
 0 44 1 1.63 0.00
 0 44 2 -4.18 0.00
 0 44 3 3.45 0.00
 0 44 4 -3.66 0.00
 0 44 5 1.36 0.00
 0 44 6 -2.43 0.00
 0 44 7 -4.36 0.00
 0 44 8 1.64 0.00
 0 44 9 3.12 0.00
 0 46 1 6.79 0.00
 0 46 2 0.83 0.00
 0 46 3 0.86 0.00
 0 46 4 5.27 0.00
 0 46 5 -3.15 0.00
 0 46 6 2.54 0.00
 0 46 7 -6.20 0.00
 1 1 1 520.96 0.00
 1 1 2 -6.26 0.00
 1 1 3 -168.76 0.00
 1 1 4 22.29 0.00
 1 1 5 1.48 0.00
 1 1 6 6.98 0.00
 1 1 9 -19.22 0.00
 1 1 10 -11.03 0.00
 1 1 11 1.21 0.00
 1 1 12 9.03 0.00
 1 1 13 -2.84 0.00
 1 1 14 -0.24 0.00
 1 1 15 -2.59 0.00
 1 1 16 2.94 0.00
 1 1 17 3.79 0.00
 1 1 18 -1.34 0.00
 1 1 19 6.08 0.00
 1 3 0 10.88 0.00
 1 3 1 263.39 0.00
 1 3 2 -63.37 0.00
 1 3 3 -52.04 0.00
 1 3 4 -2.05 0.00
 1 3 5 23.43 0.00
 1 3 6 -3.78 0.00
 1 3 7 8.78 0.00
 1 3 9 -1.39 0.00
 1 3 10 -10.36 0.00
 1 3 11 7.57 0.00
 1 3 12 3.64 0.00
 1 3 13 2.62 0.00
 1 3 14 0.12 0.00
 1 3 15 -7.10 0.00
 1 3 16 3.39 0.00
 1 3 17 -3.90 0.00
 1 3 18 3.11 0.00
 1 3 19 1.81 0.00
 1 5 1 -119.89 0.00
 1 5 2 43.76 0.00
 1 5 3 -17.47 0.00
 1 5 4 2.35 0.00
 1 5 5 13.04 0.00
 1 5 6 -3.69 0.00
 1 5 7 15.13 0.00
 1 5 8 -22.97 0.00
 1 5 9 -16.72 0.00
 1 5 10 1.67 0.00
 1 5 11 -2.96 0.00
 1 5 12 0.20 0.00
 1 5 13 7.73 0.00
 1 5 14 -4.63 0.00
 1 5 15 -6.19 0.00
 1 5 16 -1.90 0.00
 1 5 17 0.70 0.00
 1 5 18 -1.26 0.00
 1 5 19 4.85 0.00
 1 5 20 -7.04 0.00
 1 7 0 11.22 0.00
 1 7 1 99.54 0.00
 1 7 2 30.30 0.00
 1 7 3 48.43 0.00
 1 7 4 0.74 0.00
 1 7 5 6.18 0.00
 1 7 6 24.54 0.00
 1 7 7 5.79 0.00
 1 7 8 -15.05 0.00
 1 7 9 -1.64 0.00
 1 7 10 9.13 0.00
 1 7 11 -2.95 0.00
 1 7 12 0.12 0.00
 1 7 13 6.77 0.00
 1 7 14 2.19 0.00
 1 7 15 -3.11 0.00
 1 7 16 -3.71 0.00
 1 7 17 -1.74 0.00
 1 7 18 1.24 0.00
 1 7 19 5.27 0.00
 1 7 20 -3.96 0.00
 1 9 0 -36.08 0.00
 1 9 1 -3.78 0.00
 1 9 2 -23.40 0.00
 1 9 3 48.69 0.00
 1 9 4 -40.47 0.00
 1 9 5 -4.71 0.00
 1 9 6 17.50 0.00
 1 9 7 12.35 0.00
 1 9 8 -9.18 0.00
 1 9 9 -12.33 0.00
 1 9 10 4.16 0.00
 1 9 11 -0.08 0.00
 1 9 12 -7.70 0.00
 1 9 13 3.56 0.00
 1 9 14 1.10 0.00
 1 9 15 -0.29 0.00
 1 9 16 -5.67 0.00
 1 9 17 -0.47 0.00
 1 9 18 0.05 0.00
 1 9 19 2.13 0.00
 1 9 20 -2.41 0.00
 1 11 0 5.50 0.00
 1 11 1 -12.75 0.00
 1 11 2 16.94 0.00
 1 11 3 24.40 0.00
 1 11 4 -22.29 0.00
 1 11 5 0.54 0.00
 1 11 6 20.23 0.00
 1 11 7 11.89 0.00
 1 11 8 5.21 0.00
 1 11 9 -3.64 0.00
 1 11 10 12.12 0.00
 1 11 11 1.64 0.00
 1 11 12 -2.71 0.00
 1 11 13 -2.12 0.00
 1 11 14 3.70 0.00
 1 11 15 1.67 0.00
 1 11 16 -4.41 0.00
 1 11 17 1.13 0.00
 1 11 18 2.61 0.00
 1 11 19 2.78 0.00
 1 13 0 -0.10 0.00
 1 13 1 22.28 0.00
 1 13 2 2.83 0.00
 1 13 3 49.54 0.00
 1 13 4 -8.21 0.00
 1 13 5 -11.93 0.00
 1 13 6 11.21 0.00
 1 13 7 10.93 0.00
 1 13 8 0.74 0.00
 1 13 9 10.55 0.00
 1 13 10 1.88 0.00
 1 13 11 2.38 0.00
 1 13 12 -8.24 0.00
 1 13 13 1.80 0.00
 1 13 14 5.51 0.00
 1 13 15 1.27 0.00
 1 13 16 1.21 0.00
 1 13 17 0.48 0.00
 1 13 18 -3.11 0.00
 1 13 19 -2.35 0.00
 1 15 0 0.01 0.00
 1 15 1 -22.42 0.00
 1 15 2 1.68 0.00
 1 15 3 4.00 0.00
 1 15 4 6.80 0.00
 1 15 5 3.43 0.00
 1 15 6 -4.40 0.00
 1 15 7 -3.07 0.00
 1 15 8 -2.58 0.00
 1 15 9 5.00 0.00
 1 15 10 0.85 0.00
 1 15 11 -2.00 0.00
 1 15 12 2.73 0.00
 1 15 13 0.03 0.00
 1 15 14 -0.45 0.00
 1 15 15 1.56 0.00
 1 15 16 3.29 0.00
 1 15 17 -4.11 0.00
 1 15 18 0.07 0.00
 1 15 19 -0.18 0.00
 1 17 0 11.30 0.00
 1 17 1 -5.70 0.00
 1 17 2 -13.60 0.00
 1 17 3 5.67 0.00
 1 17 4 16.48 0.00
 1 17 5 -0.14 0.00
 1 17 6 -1.25 0.00
 1 17 7 -7.69 0.00
 1 17 8 4.86 0.00
 1 17 9 7.26 0.00
 1 17 10 1.60 0.00
 1 17 11 -4.11 0.00
 1 17 12 -0.22 0.00
 1 17 13 0.58 0.00
 1 17 14 -5.16 0.00
 1 17 15 1.96 0.00
 1 17 16 2.95 0.00
 1 17 17 -2.39 0.00
 1 17 18 -2.69 0.00
 1 17 19 0.50 0.00
 1 19 0 2.67 0.00
 1 19 1 4.21 0.00
 1 19 2 3.68 0.00
 1 19 3 -3.41 0.00
 1 19 4 12.56 0.00
 1 19 5 6.44 0.00
 1 19 6 -7.88 0.00
 1 19 7 -4.70 0.00
 1 19 8 -0.05 0.00
 1 19 9 12.73 0.00
 1 19 10 -7.23 0.00
 1 19 11 -2.38 0.00
 1 19 12 3.99 0.00
 1 19 13 2.51 0.00
 1 19 14 -2.56 0.00
 1 19 15 1.38 0.00
 1 19 16 1.58 0.00
 1 19 17 1.03 0.00
 1 19 18 -1.48 0.00
 1 21 0 -3.55 0.00
 1 21 1 8.68 0.00
 1 21 2 -6.21 0.00
 1 21 3 -3.54 0.00
 1 21 4 2.55 0.00
 1 21 5 -0.76 0.00
 1 21 6 -2.41 0.00
 1 21 7 0.89 0.00
 1 21 8 0.59 0.00
 1 21 9 2.67 0.00
 1 21 10 0.34 0.00
 1 21 11 1.01 0.00
 1 21 12 -1.26 0.00
 1 21 13 -5.51 0.00
 1 21 14 -0.14 0.00
 1 21 15 -1.36 0.00
 1 21 16 -0.50 0.00
 1 21 17 -5.88 0.00
 1 21 18 -6.72 0.00
 1 23 0 -0.19 0.00
 1 23 1 3.38 0.00
 1 23 2 9.56 0.00
 1 23 3 2.73 0.00
 1 23 4 3.55 0.00
 1 23 5 -0.78 0.00
 1 23 6 1.52 0.00
 1 23 7 -2.25 0.00
 1 23 8 3.93 0.00
 1 23 9 0.79 0.00
 1 23 10 -4.02 0.00
 1 23 11 -9.94 0.00
 1 23 12 2.61 0.00
 1 23 13 -2.51 0.00
 1 23 14 -3.42 0.00
 1 23 15 3.27 0.00
 1 23 16 1.61 0.00
 1 23 17 -6.40 0.00
 1 23 18 5.80 0.00
 1 25 0 -1.02 0.00
 1 25 1 -3.08 0.00
 1 25 2 8.96 0.00
 1 25 3 -6.20 0.00
 1 25 4 -2.73 0.00
 1 25 5 2.12 0.00
 1 25 6 2.93 0.00
 1 25 7 3.63 0.00
 1 25 8 -1.20 0.00
 1 25 9 -1.04 0.00
 1 25 10 -1.34 0.00
 1 25 11 0.64 0.00
 1 25 12 0.25 0.00
 1 25 13 -2.81 0.00
 1 25 14 0.88 0.00
 1 25 15 4.55 0.00
 1 25 16 -3.42 0.00
 1 25 17 -6.75 0.00
 1 27 0 -9.52 0.00
 1 27 1 1.94 0.00
 1 27 2 1.19 0.00
 1 27 3 -6.45 0.00
 1 27 4 -4.15 0.00
 1 27 5 0.12 0.00
 1 27 6 8.65 0.00
 1 27 7 5.33 0.00
 1 27 8 6.52 0.00
 1 27 9 -1.92 0.00
 1 27 10 0.43 0.00
 1 27 11 0.10 0.00
 1 27 12 3.91 0.00
 1 27 13 -3.12 0.00
 1 27 14 -1.10 0.00
 1 27 15 0.59 0.00
 1 27 16 0.53 0.00
 1 27 17 -2.97 0.00
 1 29 0 3.41 0.00
 1 29 1 -1.80 0.00
 1 29 2 4.09 0.00
 1 29 3 -3.08 0.00
 1 29 4 -4.94 0.00
 1 29 5 0.27 0.00
 1 29 6 3.89 0.00
 1 29 7 6.20 0.00
 1 29 8 2.43 0.00
 1 29 9 -2.55 0.00
 1 29 10 -2.77 0.00
 1 29 11 4.00 0.00
 1 29 12 0.27 0.00
 1 29 13 3.29 0.00
 1 29 14 -2.50 0.00
 1 29 15 -0.26 0.00
 1 29 16 6.78 0.00
 1 31 0 -2.23 0.00
 1 31 1 1.13 0.00
 1 31 2 5.35 0.00
 1 31 3 -5.14 0.00
 1 31 4 4.95 0.00
 1 31 5 1.28 0.00
 1 31 6 0.50 0.00
 1 31 7 2.70 0.00
 1 31 8 2.07 0.00
 1 31 9 -0.48 0.00
 1 31 10 -7.17 0.00
 1 31 11 4.96 0.00
 1 31 12 -1.97 0.00
 1 31 13 6.57 0.00
 1 31 14 2.85 0.00
 1 31 15 -2.66 0.00
 1 33 0 -3.90 0.00
 1 33 1 -1.04 0.00
 1 33 2 -2.26 0.00
 1 33 3 2.97 0.00
 1 33 4 0.69 0.00
 1 33 5 -2.56 0.00
 1 33 6 -4.78 0.00
 1 33 7 6.59 0.00
 1 33 8 3.80 0.00
 1 33 9 1.51 0.00
 1 33 10 -0.50 0.00
 1 33 11 -3.15 0.00
 1 33 12 1.21 0.00
 1 33 13 5.01 0.00
 1 33 14 -0.12 0.00
 1 33 15 -4.32 0.00
 1 35 0 0.46 0.00
 1 35 1 2.69 0.00
 1 35 2 1.80 0.00
 1 35 3 1.88 0.00
 1 35 4 1.27 0.00
 1 35 5 -0.82 0.00
 1 35 6 -6.81 0.00
 1 35 7 -8.05 0.00
 1 35 8 1.76 0.00
 1 35 9 2.29 0.00
 1 35 10 -0.36 0.00
 1 35 11 -5.49 0.00
 1 35 12 -0.85 0.00
 1 35 14 3.33 0.00
 1 37 0 3.81 0.00
 1 37 1 -4.64 0.00
 1 37 2 -0.29 0.00
 1 37 3 7.16 0.00
 1 37 4 4.56 0.00
 1 37 5 -1.66 0.00
 1 37 6 -4.28 0.00
 1 37 7 -0.76 0.00
 1 37 8 2.43 0.00
 1 37 9 0.74 0.00
 1 37 10 2.94 0.00
 1 37 11 1.02 0.00
 1 37 12 -4.30 0.00
 1 37 13 2.24 0.00
 1 39 0 -4.45 0.00
 1 39 1 3.18 0.00
 1 39 2 0.22 0.00
 1 39 3 -1.43 0.00
 1 39 4 1.41 0.00
 1 39 5 1.54 0.00
 1 39 6 -1.33 0.00
 1 39 7 0.70 0.00
 1 39 8 -0.86 0.00
 1 39 9 -2.24 0.00
 1 39 10 1.32 0.00
 1 39 11 5.11 0.00
 1 39 12 -0.52 0.00
 1 41 0 2.68 0.00
 1 41 1 -3.57 0.00
 1 41 2 -3.05 0.00
 1 41 3 -0.47 0.00
 1 41 4 -0.95 0.00
 1 41 5 -1.61 0.00
 1 41 6 0.40 0.00
 1 41 7 -3.68 0.00
 1 41 8 -3.39 0.00
 1 41 9 0.87 0.00
 1 41 10 -2.44 0.00
 1 41 11 1.10 0.00
 1 43 0 -5.54 0.00
 1 43 1 1.40 0.00
 1 43 2 2.50 0.00
 1 43 3 -0.55 0.00
 1 43 4 0.17 0.00
 1 43 5 2.31 0.00
 1 43 6 1.47 0.00
 1 43 7 0.62 0.00
 1 43 8 -0.86 0.00
 1 43 9 1.57 0.00
 1 43 10 -6.73 0.00
 1 45 0 -4.06 0.00
 1 45 1 -3.59 0.00
 1 45 2 2.52 0.00
 1 45 3 0.08 0.00
 1 45 4 -3.87 0.00
 1 45 5 -1.12 0.00
 1 45 6 -0.51 0.00
 1 45 7 1.62 0.00
 1 45 8 2.78 0.00
 1 47 1 0.97 0.00
 1 47 2 2.47 0.00
 1 47 3 -1.03 0.00
 1 47 4 -1.14 0.00
 1 47 5 -1.47 0.00
 2 0 0 434.82 0.00
 2 0 1 -28.28 0.00
 2 0 2 -108.86 0.00
 2 0 3 -12.74 0.00
 2 0 4 -101.89 0.00
 2 0 5 15.72 0.00
 2 0 6 6.74 0.00
 2 0 9 -9.85 0.00
 2 0 10 -2.44 0.00
 2 0 11 -3.67 0.00
 2 0 12 10.44 0.00
 2 0 13 1.94 0.00
 2 0 14 -9.39 0.00
 2 0 15 11.49 0.00
 2 0 16 1.52 0.00
 2 0 17 8.21 0.00
 2 0 18 -0.18 0.00
 2 0 19 1.37 0.00
 2 2 0 -485.70 0.00
 2 2 1 47.62 0.00
 2 2 2 -125.62 0.00
 2 2 3 -41.16 0.00
 2 2 4 -55.21 0.00
 2 2 5 -10.09 0.00
 2 2 6 10.66 0.00
 2 2 7 17.47 0.00
 2 2 9 8.99 0.00
 2 2 10 2.30 0.00
 2 2 11 -6.19 0.00
 2 2 12 11.43 0.00
 2 2 13 -3.62 0.00
 2 2 14 -8.09 0.00
 2 2 15 10.87 0.00
 2 2 16 -3.64 0.00
 2 2 17 1.28 0.00
 2 2 18 -1.68 0.00
 2 2 19 -0.30 0.00
 2 4 0 46.08 0.00
 2 4 1 -23.30 0.00
 2 4 2 93.65 0.00
 2 4 3 80.73 0.00
 2 4 4 68.40 0.00
 2 4 5 -6.98 0.00
 2 4 6 49.09 0.00
 2 4 7 -1.80 0.00
 2 4 8 6.19 0.00
 2 4 9 -10.80 0.00
 2 4 10 -0.30 0.00
 2 4 11 -6.53 0.00
 2 4 12 4.92 0.00
 2 4 13 -9.82 0.00
 2 4 14 -5.32 0.00
 2 4 15 -1.91 0.00
 2 4 16 -2.19 0.00
 2 4 17 -3.02 0.00
 2 4 18 5.34 0.00
 2 4 19 -2.59 0.00
 2 4 20 -0.32 0.00
 2 6 0 -30.56 0.00
 2 6 1 40.23 0.00
 2 6 2 323.80 0.00
 2 6 3 -4.21 0.00
 2 6 4 66.21 0.00
 2 6 5 -18.40 0.00
 2 6 6 43.09 0.00
 2 6 7 -22.07 0.00
 2 6 8 -4.62 0.00
 2 6 9 -11.86 0.00
 2 6 10 -19.44 0.00
 2 6 11 -1.70 0.00
 2 6 12 -0.97 0.00
 2 6 13 -2.73 0.00
 2 6 14 0.65 0.00
 2 6 15 2.27 0.00
 2 6 16 -8.09 0.00
 2 6 17 -2.97 0.00
 2 6 18 9.67 0.00
 2 6 19 -0.40 0.00
 2 6 20 -1.84 0.00
 2 8 0 -42.97 0.00
 2 8 1 44.34 0.00
 2 8 2 74.50 0.00
 2 8 3 15.95 0.00
 2 8 4 -69.40 0.00
 2 8 5 -18.01 0.00
 2 8 6 -13.92 0.00
 2 8 7 3.49 0.00
 2 8 8 -13.22 0.00
 2 8 9 -5.24 0.00
 2 8 10 -1.86 0.00
 2 8 11 6.12 0.00
 2 8 12 -5.19 0.00
 2 8 13 -1.65 0.00
 2 8 14 8.47 0.00
 2 8 15 2.43 0.00
 2 8 16 -3.84 0.00
 2 8 17 -2.59 0.00
 2 8 18 3.91 0.00
 2 8 19 4.30 0.00
 2 8 20 -0.11 0.00
 2 10 0 -19.43 0.00
 2 10 1 8.28 0.00
 2 10 2 68.33 0.00
 2 10 3 -36.54 0.00
 2 10 4 -96.87 0.00
 2 10 5 3.33 0.00
 2 10 6 0.61 0.00
 2 10 7 6.56 0.00
 2 10 8 -0.84 0.00
 2 10 9 -14.41 0.00
 2 10 10 -2.49 0.00
 2 10 11 6.34 0.00
 2 10 12 -5.34 0.00
 2 10 13 -1.87 0.00
 2 10 14 4.71 0.00
 2 10 15 4.36 0.00
 2 10 16 -7.89 0.00
 2 10 17 -2.13 0.00
 2 10 18 4.88 0.00
 2 10 19 0.18 0.00
 2 10 20 9.64 0.00
 2 12 0 -32.31 0.00
 2 12 1 -27.78 0.00
 2 12 2 25.61 0.00
 2 12 3 -7.28 0.00
 2 12 4 -32.06 0.00
 2 12 5 -21.47 0.00
 2 12 6 5.64 0.00
 2 12 7 8.53 0.00
 2 12 8 8.18 0.00
 2 12 9 3.46 0.00
 2 12 10 6.95 0.00
 2 12 11 3.21 0.00
 2 12 12 -6.92 0.00
 2 12 13 -7.57 0.00
 2 12 14 6.80 0.00
 2 12 15 -1.28 0.00
 2 12 16 -0.45 0.00
 2 12 17 -3.53 0.00
 2 12 18 1.89 0.00
 2 12 19 -3.01 0.00
 2 14 0 8.71 0.00
 2 14 1 -23.10 0.00
 2 14 2 -5.66 0.00
 2 14 3 -32.54 0.00
 2 14 4 -15.71 0.00
 2 14 5 5.17 0.00
 2 14 6 -1.90 0.00
 2 14 7 14.52 0.00
 2 14 8 9.25 0.00
 2 14 9 12.99 0.00
 2 14 10 -3.63 0.00
 2 14 11 8.13 0.00
 2 14 12 -2.36 0.00
 2 14 13 -6.29 0.00
 2 14 14 4.06 0.00
 2 14 15 1.42 0.00
 2 14 16 2.95 0.00
 2 14 17 -2.24 0.00
 2 14 18 -3.48 0.00
 2 14 19 -3.43 0.00
 2 16 0 3.28 0.00
 2 16 1 -6.74 0.00
 2 16 2 -36.48 0.00
 2 16 3 16.81 0.00
 2 16 4 22.34 0.00
 2 16 5 3.50 0.00
 2 16 6 0.70 0.00
 2 16 7 1.23 0.00
 2 16 8 6.81 0.00
 2 16 9 12.49 0.00
 2 16 10 -6.24 0.00
 2 16 11 0.01 0.00
 2 16 12 0.82 0.00
 2 16 13 1.63 0.00
 2 16 14 -9.19 0.00
 2 16 15 -1.53 0.00
 2 16 16 -2.25 0.00
 2 16 17 3.04 0.00
 2 16 18 -5.46 0.00
 2 16 19 -2.27 0.00
 2 18 0 10.37 0.00
 2 18 1 17.57 0.00
 2 18 2 -32.54 0.00
 2 18 3 1.95 0.00
 2 18 4 25.61 0.00
 2 18 5 0.41 0.00
 2 18 6 -4.20 0.00
 2 18 7 -5.39 0.00
 2 18 8 9.66 0.00
 2 18 9 3.67 0.00
 2 18 10 1.34 0.00
 2 18 11 -12.17 0.00
 2 18 12 8.69 0.00
 2 18 13 0.11 0.00
 2 18 14 2.09 0.00
 2 18 15 -0.51 0.00
 2 18 16 1.43 0.00
 2 18 17 6.45 0.00
 2 18 18 -5.83 0.00
 2 18 19 2.15 0.00
 2 20 0 41.04 0.00
 2 20 1 -5.09 0.00
 2 20 2 -15.55 0.00
 2 20 3 1.13 0.00
 2 20 4 29.58 0.00
 2 20 5 -15.25 0.00
 2 20 6 5.69 0.00
 2 20 7 2.29 0.00
 2 20 8 4.30 0.00
 2 20 9 -8.08 0.00
 2 20 10 1.93 0.00
 2 20 11 -12.08 0.00
 2 20 12 2.47 0.00
 2 20 13 7.12 0.00
 2 20 14 -5.06 0.00
 2 20 15 -1.58 0.00
 2 20 16 0.22 0.00
 2 20 17 5.05 0.00
 2 20 18 -4.71 0.00
 2 22 0 6.99 0.00
 2 22 1 1.76 0.00
 2 22 2 -10.78 0.00
 2 22 3 -0.62 0.00
 2 22 4 7.31 0.00
 2 22 5 -15.50 0.00
 2 22 6 -6.52 0.00
 2 22 7 -6.00 0.00
 2 22 8 -4.58 0.00
 2 22 9 -3.40 0.00
 2 22 10 1.56 0.00
 2 22 11 -4.64 0.00
 2 22 12 -1.91 0.00
 2 22 13 7.13 0.00
 2 22 14 -2.64 0.00
 2 22 15 -1.88 0.00
 2 22 16 1.51 0.00
 2 22 17 -0.38 0.00
 2 22 18 -1.90 0.00
 2 24 0 10.19 0.00
 2 24 1 2.46 0.00
 2 24 2 -7.19 0.00
 2 24 3 1.40 0.00
 2 24 4 1.88 0.00
 2 24 5 -10.65 0.00
 2 24 6 -6.84 0.00
 2 24 7 5.54 0.00
 2 24 8 -13.13 0.00
 2 24 9 -1.77 0.00
 2 24 10 -2.46 0.00
 2 24 11 0.60 0.00
 2 24 12 -6.77 0.00
 2 24 13 3.88 0.00
 2 24 14 -2.04 0.00
 2 24 15 -0.90 0.00
 2 24 16 1.39 0.00
 2 24 17 -2.43 0.00
 2 26 0 7.54 0.00
 2 26 1 -1.02 0.00
 2 26 2 9.70 0.00
 2 26 3 3.11 0.00
 2 26 4 -1.97 0.00
 2 26 5 -1.44 0.00
 2 26 6 4.12 0.00
 2 26 7 3.84 0.00
 2 26 8 -1.93 0.00
 2 26 9 1.05 0.00
 2 26 10 5.36 0.00
 2 26 11 4.28 0.00
 2 26 12 -2.62 0.00
 2 26 13 -4.01 0.00
 2 26 14 -2.84 0.00
 2 26 15 0.38 0.00
 2 26 16 3.45 0.00
 2 26 17 -5.79 0.00
 2 28 0 -1.31 0.00
 2 28 1 12.45 0.00
 2 28 2 0.10 0.00
 2 28 3 1.37 0.00
 2 28 4 -1.40 0.00
 2 28 5 2.12 0.00
 2 28 6 8.60 0.00
 2 28 7 3.93 0.00
 2 28 8 -2.58 0.00
 2 28 9 3.23 0.00
 2 28 10 5.37 0.00
 2 28 11 2.52 0.00
 2 28 12 3.36 0.00
 2 28 13 -7.21 0.00
 2 28 14 -0.37 0.00
 2 28 15 0.84 0.00
 2 28 16 5.50 0.00
 2 30 0 -7.86 0.00
 2 30 1 1.91 0.00
 2 30 2 -1.12 0.00
 2 30 3 5.10 0.00
 2 30 4 -4.57 0.00
 2 30 5 3.97 0.00
 2 30 6 1.86 0.00
 2 30 7 4.10 0.00
 2 30 8 -0.24 0.00
 2 30 9 -0.98 0.00
 2 30 10 2.77 0.00
 2 30 11 0.26 0.00
 2 30 12 11.71 0.00
 2 30 13 -8.55 0.00
 2 30 14 3.98 0.00
 2 30 15 0.61 0.00
 2 30 16 4.89 0.00
 2 32 0 -7.77 0.00
 2 32 1 -2.66 0.00
 2 32 2 -4.26 0.00
 2 32 3 2.95 0.00
 2 32 4 -4.51 0.00
 2 32 5 3.20 0.00
 2 32 6 2.27 0.00
 2 32 7 -4.44 0.00
 2 32 8 1.99 0.00
 2 32 9 0.43 0.00
 2 32 10 -3.63 0.00
 2 32 11 -0.23 0.00
 2 32 12 1.15 0.00
 2 32 13 7.45 0.00
 2 32 14 -2.29 0.00
 2 32 15 0.53 0.00
 2 34 0 -8.91 0.00
 2 34 1 -0.18 0.00
 2 34 2 -2.37 0.00
 2 34 3 -3.34 0.00
 2 34 4 6.37 0.00
 2 34 5 -5.20 0.00
 2 34 6 -2.56 0.00
 2 34 7 -4.43 0.00
 2 34 8 3.71 0.00
 2 34 9 0.00 0.00
 2 34 10 -1.42 0.00
 2 34 11 0.13 0.00
 2 34 12 1.48 0.00
 2 34 13 0.47 0.00
 2 34 14 0.29 0.00
 2 36 0 -3.75 0.00
 2 36 1 -7.06 0.00
 2 36 2 -2.68 0.00
 2 36 3 0.46 0.00
 2 36 4 5.81 0.00
 2 36 5 0.18 0.00
 2 36 6 -4.06 0.00
 2 36 7 -5.25 0.00
 2 36 8 5.56 0.00
 2 36 9 4.04 0.00
 2 36 10 -2.53 0.00
 2 36 11 0.77 0.00
 2 36 12 0.65 0.00
 2 36 13 0.47 0.00
 2 36 14 1.27 0.00
 2 38 0 1.91 0.00
 2 38 1 -1.67 0.00
 2 38 2 1.14 0.00
 2 38 3 1.65 0.00
 2 38 4 6.74 0.00
 2 38 5 2.25 0.00
 2 38 6 -2.92 0.00
 2 38 7 0.02 0.00
 2 38 8 0.84 0.00
 2 38 9 0.04 0.00
 2 38 10 -4.16 0.00
 2 38 11 0.48 0.00
 2 38 12 1.88 0.00
 2 38 13 -7.67 0.00
 2 40 0 6.49 0.00
 2 40 1 0.10 0.00
 2 40 2 -3.36 0.00
 2 40 3 -0.93 0.00
 2 40 4 4.90 0.00
 2 40 5 -0.95 0.00
 2 40 6 0.26 0.00
 2 40 7 -2.22 0.00
 2 40 8 -3.47 0.00
 2 40 9 1.69 0.00
 2 40 10 -3.20 0.00
 2 40 11 0.46 0.00
 2 42 0 -1.22 0.00
 2 42 1 -3.58 0.00
 2 42 2 -1.04 0.00
 2 42 3 -1.87 0.00
 2 42 4 -0.34 0.00
 2 42 5 0.92 0.00
 2 42 6 0.69 0.00
 2 42 7 1.36 0.00
 2 42 8 -1.91 0.00
 2 42 9 -0.54 0.00
 2 42 10 6.84 0.00
 2 44 0 2.87 0.00
 2 44 1 -3.20 0.00
 2 44 2 -0.49 0.00
 2 44 3 -0.52 0.00
 2 44 4 -3.54 0.00
 2 44 5 0.35 0.00
 2 44 6 2.74 0.00
 2 44 7 1.32 0.00
 2 44 8 -2.83 0.00
 2 44 9 0.11 0.00
 2 46 0 -2.29 0.00
 2 46 1 2.03 0.00
 2 46 2 6.96 0.00
 2 46 3 -1.58 0.00
 2 46 4 1.13 0.00
 2 46 5 -1.65 0.00
 2 46 6 1.20 0.00
 2 46 7 -1.76 0.00
 2 48 1 7.21 0.00
 2 48 2 -1.82 0.00
 2 48 3 -1.58 0.00
 3 1 0 -37.88 0.00
 3 1 1 -15.91 0.00
 3 1 2 -51.03 0.00
 3 1 3 4.51 0.00
 3 1 4 -18.26 0.00
 3 1 5 45.86 0.00
 3 1 6 -33.72 0.00
 3 1 7 -13.79 0.00
 3 1 9 -5.09 0.00
 3 1 10 -16.84 0.00
 3 1 11 7.17 0.00
 3 1 12 -5.03 0.00
 3 1 13 -0.70 0.00
 3 1 14 -4.22 0.00
 3 1 15 -0.41 0.00
 3 1 16 4.45 0.00
 3 1 17 1.87 0.00
 3 1 18 -1.86 0.00
 3 1 19 2.30 0.00
 3 3 0 -127.31 0.00
 3 3 1 -125.72 0.00
 3 3 2 -17.74 0.00
 3 3 3 43.91 0.00
 3 3 4 -16.19 0.00
 3 3 5 11.09 0.00
 3 3 6 -20.13 0.00
 3 3 7 -19.39 0.00
 3 3 8 29.76 0.00
 3 3 9 -0.54 0.00
 3 3 10 -4.87 0.00
 3 3 11 2.87 0.00
 3 3 12 -0.26 0.00
 3 3 13 -2.19 0.00
 3 3 14 0.36 0.00
 3 3 15 -1.37 0.00
 3 3 16 1.62 0.00
 3 3 17 0.28 0.00
 3 3 18 -1.19 0.00
 3 3 19 0.51 0.00
 3 5 0 -21.52 0.00
 3 5 1 -152.48 0.00
 3 5 2 91.87 0.00
 3 5 3 78.30 0.00
 3 5 4 4.32 0.00
 3 5 5 -7.19 0.00
 3 5 6 -4.24 0.00
 3 5 7 8.71 0.00
 3 5 8 12.15 0.00
 3 5 9 -0.97 0.00
 3 5 10 8.48 0.00
 3 5 11 -1.35 0.00
 3 5 12 6.85 0.00
 3 5 13 3.06 0.00
 3 5 14 0.95 0.00
 3 5 15 1.28 0.00
 3 5 16 -2.20 0.00
 3 5 17 6.55 0.00
 3 5 18 -3.83 0.00
 3 5 19 3.44 0.00
 3 5 20 -7.96 0.00
 3 7 0 17.11 0.00
 3 7 1 16.61 0.00
 3 7 2 62.74 0.00
 3 7 3 52.18 0.00
 3 7 4 -15.29 0.00
 3 7 5 -34.10 0.00
 3 7 6 6.99 0.00
 3 7 7 8.42 0.00
 3 7 8 -8.75 0.00
 3 7 9 8.88 0.00
 3 7 10 -0.98 0.00
 3 7 11 -0.96 0.00
 3 7 12 -1.51 0.00
 3 7 13 1.34 0.00
 3 7 14 3.78 0.00
 3 7 15 -0.68 0.00
 3 7 16 -1.19 0.00
 3 7 17 -4.11 0.00
 3 7 18 3.68 0.00
 3 7 19 1.73 0.00
 3 7 20 1.62 0.00
 3 9 0 0.29 0.00
 3 9 1 -3.35 0.00
 3 9 2 29.65 0.00
 3 9 3 18.19 0.00
 3 9 4 -21.32 0.00
 3 9 5 -43.14 0.00
 3 9 6 5.12 0.00
 3 9 7 12.71 0.00
 3 9 8 -25.40 0.00
 3 9 9 -7.67 0.00
 3 9 10 -9.88 0.00
 3 9 11 -0.09 0.00
 3 9 12 -10.29 0.00
 3 9 13 1.94 0.00
 3 9 14 2.76 0.00
 3 9 15 2.51 0.00
 3 9 16 1.66 0.00
 3 9 17 -6.86 0.00
 3 9 18 6.37 0.00
 3 9 19 -2.52 0.00
 3 9 20 2.21 0.00
 3 11 0 26.76 0.00
 3 11 1 -18.98 0.00
 3 11 2 26.66 0.00
 3 11 3 -16.93 0.00
 3 11 4 -10.89 0.00
 3 11 5 -34.84 0.00
 3 11 6 10.45 0.00
 3 11 7 13.44 0.00
 3 11 8 -11.07 0.00
 3 11 9 -4.40 0.00
 3 11 10 8.79 0.00
 3 11 11 0.25 0.00
 3 11 12 -4.46 0.00
 3 11 13 -1.89 0.00
 3 11 14 5.33 0.00
 3 11 15 4.72 0.00
 3 11 16 2.33 0.00
 3 11 17 -3.59 0.00
 3 11 18 4.66 0.00
 3 11 19 -1.80 0.00
 3 11 20 2.95 0.00
 3 13 0 -2.74 0.00
 3 13 1 -0.80 0.00
 3 13 2 -10.83 0.00
 3 13 3 -8.51 0.00
 3 13 4 -9.93 0.00
 3 13 5 -28.09 0.00
 3 13 6 -0.13 0.00
 3 13 7 7.58 0.00
 3 13 8 -3.53 0.00
 3 13 9 1.37 0.00
 3 13 10 11.79 0.00
 3 13 11 -2.33 0.00
 3 13 12 -9.58 0.00
 3 13 13 -1.91 0.00
 3 13 14 1.03 0.00
 3 13 15 0.33 0.00
 3 13 16 0.18 0.00
 3 13 17 0.91 0.00
 3 13 18 -5.64 0.00
 3 13 19 -5.88 0.00
 3 15 0 -5.28 0.00
 3 15 1 -3.51 0.00
 3 15 2 -25.56 0.00
 3 15 3 -9.15 0.00
 3 15 4 -9.48 0.00
 3 15 5 8.66 0.00
 3 15 6 -17.96 0.00
 3 15 7 8.68 0.00
 3 15 8 -3.92 0.00
 3 15 9 -3.95 0.00
 3 15 10 7.69 0.00
 3 15 11 -3.11 0.00
 3 15 12 -3.27 0.00
 3 15 13 2.96 0.00
 3 15 14 -5.34 0.00
 3 15 15 2.08 0.00
 3 15 16 0.80 0.00
 3 15 17 3.12 0.00
 3 15 18 -2.57 0.00
 3 15 19 -0.61 0.00
 3 17 0 23.58 0.00
 3 17 1 18.05 0.00
 3 17 2 -16.87 0.00
 3 17 3 4.49 0.00
 3 17 4 7.93 0.00
 3 17 5 10.76 0.00
 3 17 6 -5.30 0.00
 3 17 7 -1.18 0.00
 3 17 8 9.15 0.00
 3 17 9 -0.70 0.00
 3 17 10 0.20 0.00
 3 17 11 -2.58 0.00
 3 17 12 -0.86 0.00
 3 17 13 2.20 0.00
 3 17 14 -1.23 0.00
 3 17 15 -2.67 0.00
 3 17 16 3.33 0.00
 3 17 17 4.92 0.00
 3 17 18 -0.79 0.00
 3 17 19 2.42 0.00
 3 19 0 13.25 0.00
 3 19 1 5.48 0.00
 3 19 2 -3.53 0.00
 3 19 3 -12.38 0.00
 3 19 4 2.33 0.00
 3 19 5 2.04 0.00
 3 19 6 -7.12 0.00
 3 19 7 -8.63 0.00
 3 19 8 6.57 0.00
 3 19 9 -2.99 0.00
 3 19 10 -7.36 0.00
 3 19 11 -2.95 0.00
 3 19 12 6.78 0.00
 3 19 13 5.12 0.00
 3 19 14 4.40 0.00
 3 19 15 -4.81 0.00
 3 19 16 3.20 0.00
 3 19 17 2.53 0.00
 3 19 18 1.28 0.00
 3 21 0 6.83 0.00
 3 21 1 -4.09 0.00
 3 21 2 0.98 0.00
 3 21 3 -12.03 0.00
 3 21 4 5.51 0.00
 3 21 5 0.99 0.00
 3 21 6 0.29 0.00
 3 21 7 -1.89 0.00
 3 21 8 1.21 0.00
 3 21 9 -4.38 0.00
 3 21 10 -6.75 0.00
 3 21 11 2.09 0.00
 3 21 12 2.53 0.00
 3 21 13 -1.40 0.00
 3 21 14 4.37 0.00
 3 21 15 -3.11 0.00
 3 21 16 -1.86 0.00
 3 21 17 2.01 0.00
 3 21 18 -1.10 0.00
 3 23 0 -5.04 0.00
 3 23 1 -3.43 0.00
 3 23 2 0.38 0.00
 3 23 3 1.05 0.00
 3 23 4 -2.01 0.00
 3 23 5 5.30 0.00
 3 23 6 1.25 0.00
 3 23 7 0.89 0.00
 3 23 8 2.00 0.00
 3 23 9 2.05 0.00
 3 23 10 -7.36 0.00
 3 23 11 -3.14 0.00
 3 23 12 3.25 0.00
 3 23 13 -2.44 0.00
 3 23 14 -2.43 0.00
 3 23 15 2.51 0.00
 3 23 16 -0.89 0.00
 3 23 17 -1.66 0.00
 3 23 18 6.63 0.00
 3 25 0 -5.79 0.00
 3 25 1 -0.92 0.00
 3 25 2 4.42 0.00
 3 25 3 -2.09 0.00
 3 25 4 -9.05 0.00
 3 25 5 8.18 0.00
 3 25 6 -4.08 0.00
 3 25 7 -1.55 0.00
 3 25 8 -4.46 0.00
 3 25 9 -0.04 0.00
 3 25 10 -1.37 0.00
 3 25 11 4.13 0.00
 3 25 12 -0.86 0.00
 3 25 13 -5.38 0.00
 3 25 14 -1.09 0.00
 3 25 15 4.13 0.00
 3 25 16 -3.07 0.00
 3 25 17 -8.97 0.00
 3 27 0 -2.75 0.00
 3 27 1 5.90 0.00
 3 27 2 4.25 0.00
 3 27 3 -1.59 0.00
 3 27 4 -1.85 0.00
 3 27 5 2.66 0.00
 3 27 6 2.40 0.00
 3 27 7 -1.03 0.00
 3 27 8 -2.35 0.00
 3 27 9 -0.43 0.00
 3 27 10 2.02 0.00
 3 27 11 2.01 0.00
 3 27 12 1.64 0.00
 3 27 13 -6.96 0.00
 3 27 14 -3.20 0.00
 3 27 15 5.54 0.00
 3 27 16 0.43 0.00
 3 27 17 -8.88 0.00
 3 29 0 -2.20 0.00
 3 29 1 -0.32 0.00
 3 29 2 -1.38 0.00
 3 29 3 -1.99 0.00
 3 29 4 -6.27 0.00
 3 29 5 2.39 0.00
 3 29 6 1.83 0.00
 3 29 7 -1.80 0.00
 3 29 8 4.27 0.00
 3 29 9 -2.75 0.00
 3 29 10 5.17 0.00
 3 29 11 3.39 0.00
 3 29 12 -0.38 0.00
 3 29 13 -0.50 0.00
 3 29 14 -4.20 0.00
 3 29 15 0.60 0.00
 3 29 16 4.05 0.00
 3 31 0 -3.71 0.00
 3 31 1 0.44 0.00
 3 31 2 -2.33 0.00
 3 31 3 -2.15 0.00
 3 31 4 0.97 0.00
 3 31 5 3.10 0.00
 3 31 6 -2.27 0.00
 3 31 7 -1.60 0.00
 3 31 8 0.41 0.00
 3 31 9 -3.84 0.00
 3 31 10 -1.28 0.00
 3 31 11 2.57 0.00
 3 31 12 -2.02 0.00
 3 31 13 0.63 0.00
 3 31 14 2.85 0.00
 3 31 15 -3.34 0.00
 3 33 0 -0.91 0.00
 3 33 1 0.56 0.00
 3 33 2 -2.31 0.00
 3 33 3 4.65 0.00
 3 33 4 2.06 0.00
 3 33 5 0.37 0.00
 3 33 6 -3.46 0.00
 3 33 7 2.67 0.00
 3 33 8 4.18 0.00
 3 33 9 -1.43 0.00
 3 33 10 -0.02 0.00
 3 33 11 -2.22 0.00
 3 33 12 1.44 0.00
 3 33 13 3.69 0.00
 3 33 14 2.85 0.00
 3 33 15 -1.96 0.00
 3 35 0 1.43 0.00
 3 35 1 1.57 0.00
 3 35 2 -1.59 0.00
 3 35 3 1.58 0.00
 3 35 4 4.62 0.00
 3 35 5 -0.38 0.00
 3 35 6 -1.40 0.00
 3 35 7 -5.28 0.00
 3 35 8 4.42 0.00
 3 35 9 2.94 0.00
 3 35 10 -0.04 0.00
 3 35 11 -0.79 0.00
 3 35 12 0.60 0.00
 3 35 13 2.33 0.00
 3 35 14 1.49 0.00
 3 37 0 -0.37 0.00
 3 37 1 -5.68 0.00
 3 37 2 -5.35 0.00
 3 37 3 3.76 0.00
 3 37 4 4.18 0.00
 3 37 5 -0.99 0.00
 3 37 6 -4.78 0.00
 3 37 7 1.65 0.00
 3 37 8 -1.55 0.00
 3 37 9 3.39 0.00
 3 37 10 -5.79 0.00
 3 37 11 1.29 0.00
 3 37 12 -4.78 0.00
 3 37 13 0.98 0.00
 3 39 0 -3.66 0.00
 3 39 1 9.40 0.00
 3 39 2 -3.84 0.00
 3 39 3 1.26 0.00
 3 39 4 0.63 0.00
 3 39 5 0.27 0.00
 3 39 6 -5.26 0.00
 3 39 7 0.67 0.00
 3 39 8 -6.44 0.00
 3 39 9 -4.48 0.00
 3 39 10 -1.44 0.00
 3 39 11 -1.69 0.00
 3 39 12 0.71 0.00
 3 41 0 7.27 0.00
 3 41 1 3.60 0.00
 3 41 2 -0.77 0.00
 3 41 3 4.01 0.00
 3 41 4 2.17 0.00
 3 41 5 1.98 0.00
 3 41 6 2.28 0.00
 3 41 7 -3.17 0.00
 3 41 8 -1.40 0.00
 3 41 9 -1.25 0.00
 3 41 10 2.67 0.00
 3 41 11 -1.17 0.00
 3 43 0 0.27 0.00
 3 43 1 -0.29 0.00
 3 43 2 1.58 0.00
 3 43 3 -4.58 0.00
 3 43 4 2.71 0.00
 3 43 5 0.01 0.00
 3 43 6 2.49 0.00
 3 43 7 -1.56 0.00
 3 43 8 0.02 0.00
 3 43 9 -0.77 0.00
 3 45 0 -2.48 0.00
 3 45 1 -1.56 0.00
 3 45 2 2.19 0.00
 3 45 3 -1.57 0.00
 3 45 4 0.63 0.00
 3 45 5 0.43 0.00
 3 45 6 -0.32 0.00
 3 45 7 1.18 0.00
 3 45 8 1.82 0.00
 3 47 0 4.57 0.00
 3 47 1 -0.18 0.00
 3 47 2 -5.45 0.00
 3 47 3 -1.78 0.00
 3 47 4 -1.62 0.00
 3 47 5 0.64 0.00
 4 0 0 568.27 0.00
 4 0 1 0.50 0.00
 4 0 2 -6.78 0.00
 4 0 3 -1.71 0.00
 4 0 4 77.96 0.00
 4 0 5 -30.40 0.00
 4 0 6 -32.74 0.00
 4 0 7 -10.39 0.00
 4 0 9 13.65 0.00
 4 0 10 -14.47 0.00
 4 0 11 -9.09 0.00
 4 0 12 -1.81 0.00
 4 0 13 4.44 0.00
 4 0 14 -4.85 0.00
 4 0 15 -10.38 0.00
 4 0 16 3.13 0.00
 4 0 17 3.38 0.00
 4 0 18 -4.54 0.00
 4 0 19 0.86 0.00
 4 2 0 -19.67 0.00
 4 2 1 13.60 0.00
 4 2 2 -25.90 0.00
 4 2 3 -0.03 0.00
 4 2 4 64.37 0.00
 4 2 5 -27.57 0.00
 4 2 6 -29.42 0.00
 4 2 7 13.37 0.00
 4 2 8 -3.66 0.00
 4 2 9 19.30 0.00
 4 2 10 3.31 0.00
 4 2 11 -6.83 0.00
 4 2 12 0.83 0.00
 4 2 13 4.82 0.00
 4 2 14 1.71 0.00
 4 2 15 -3.20 0.00
 4 2 16 2.88 0.00
 4 2 17 5.66 0.00
 4 2 18 -5.24 0.00
 4 2 19 0.78 0.00
 4 4 0 26.81 0.00
 4 4 1 -49.81 0.00
 4 4 2 -93.63 0.00
 4 4 3 31.76 0.00
 4 4 4 20.53 0.00
 4 4 5 -11.18 0.00
 4 4 6 -38.03 0.00
 4 4 7 3.02 0.00
 4 4 8 -1.91 0.00
 4 4 9 15.96 0.00
 4 4 10 8.73 0.00
 4 4 11 -8.70 0.00
 4 4 12 3.61 0.00
 4 4 13 1.93 0.00
 4 4 14 3.47 0.00
 4 4 15 -1.64 0.00
 4 4 16 7.43 0.00
 4 4 17 0.64 0.00
 4 4 18 -0.69 0.00
 4 4 19 0.97 0.00
 4 4 20 3.70 0.00
 4 6 0 -119.28 0.00
 4 6 1 -25.64 0.00
 4 6 2 -1.40 0.00
 4 6 3 -3.82 0.00
 4 6 4 -14.40 0.00
 4 6 5 -5.95 0.00
 4 6 6 -13.83 0.00
 4 6 7 -14.87 0.00
 4 6 8 -6.27 0.00
 4 6 9 10.27 0.00
 4 6 10 3.28 0.00
 4 6 11 -1.56 0.00
 4 6 12 -1.75 0.00
 4 6 13 4.43 0.00
 4 6 14 4.34 0.00
 4 6 15 3.45 0.00
 4 6 16 -1.77 0.00
 4 6 17 -0.15 0.00
 4 6 18 1.45 0.00
 4 6 19 -0.24 0.00
 4 6 20 -2.39 0.00
 4 8 0 -103.14 0.00
 4 8 1 3.29 0.00
 4 8 2 -41.62 0.00
 4 8 3 11.18 0.00
 4 8 4 -9.99 0.00
 4 8 5 9.20 0.00
 4 8 6 -1.47 0.00
 4 8 7 -7.64 0.00
 4 8 8 -5.97 0.00
 4 8 9 7.04 0.00
 4 8 10 12.85 0.00
 4 8 11 -0.59 0.00
 4 8 12 0.11 0.00
 4 8 13 -0.59 0.00
 4 8 14 10.07 0.00
 4 8 15 5.98 0.00
 4 8 16 2.98 0.00
 4 8 17 -5.54 0.00
 4 8 18 1.76 0.00
 4 8 19 3.98 0.00
 4 8 20 -1.71 0.00
 4 10 0 -40.86 0.00
 4 10 1 20.25 0.00
 4 10 2 11.47 0.00
 4 10 3 -0.87 0.00
 4 10 4 -10.55 0.00
 4 10 5 11.68 0.00
 4 10 6 14.82 0.00
 4 10 7 -8.44 0.00
 4 10 8 -10.28 0.00
 4 10 9 -6.30 0.00
 4 10 10 6.54 0.00
 4 10 11 0.36 0.00
 4 10 12 -6.82 0.00
 4 10 13 -4.34 0.00
 4 10 14 5.94 0.00
 4 10 15 6.57 0.00
 4 10 16 -4.75 0.00
 4 10 17 -4.46 0.00
 4 10 18 2.37 0.00
 4 10 19 0.00 0.00
 4 10 20 0.14 0.00
 4 12 0 -24.18 0.00
 4 12 1 21.57 0.00
 4 12 2 33.78 0.00
 4 12 3 9.39 0.00
 4 12 4 9.58 0.00
 4 12 5 1.11 0.00
 4 12 6 6.59 0.00
 4 12 7 -15.06 0.00
 4 12 8 -8.08 0.00
 4 12 9 1.17 0.00
 4 12 10 4.84 0.00
 4 12 11 0.35 0.00
 4 12 12 -2.29 0.00
 4 12 13 -7.02 0.00
 4 12 14 8.13 0.00
 4 12 15 7.05 0.00
 4 12 16 3.43 0.00
 4 12 17 -2.35 0.00
 4 12 18 1.12 0.00
 4 12 19 0.94 0.00
 4 14 0 -4.56 0.00
 4 14 1 13.97 0.00
 4 14 2 -2.11 0.00
 4 14 3 -16.61 0.00
 4 14 4 -9.57 0.00
 4 14 5 9.73 0.00
 4 14 6 -7.48 0.00
 4 14 7 -7.73 0.00
 4 14 8 0.00 0.00
 4 14 9 -2.84 0.00
 4 14 10 -3.67 0.00
 4 14 11 -0.12 0.00
 4 14 12 -2.87 0.00
 4 14 13 -7.22 0.00
 4 14 14 0.57 0.00
 4 14 15 9.45 0.00
 4 14 16 5.51 0.00
 4 14 17 2.44 0.00
 4 14 18 3.71 0.00
 4 14 19 1.98 0.00
 4 16 0 0.97 0.00
 4 16 1 5.95 0.00
 4 16 2 -12.83 0.00
 4 16 3 -14.09 0.00
 4 16 4 -8.19 0.00
 4 16 5 1.67 0.00
 4 16 6 -7.06 0.00
 4 16 7 -16.77 0.00
 4 16 8 0.56 0.00
 4 16 9 -3.17 0.00
 4 16 10 -12.96 0.00
 4 16 11 1.70 0.00
 4 16 12 5.36 0.00
 4 16 13 3.09 0.00
 4 16 14 -8.71 0.00
 4 16 15 2.01 0.00
 4 16 16 1.60 0.00
 4 16 17 0.90 0.00
 4 16 18 2.34 0.00
 4 16 19 -2.45 0.00
 4 18 0 18.61 0.00
 4 18 1 11.62 0.00
 4 18 2 -2.42 0.00
 4 18 3 -11.19 0.00
 4 18 4 -4.63 0.00
 4 18 5 3.08 0.00
 4 18 6 -12.79 0.00
 4 18 7 -10.83 0.00
 4 18 8 8.64 0.00
 4 18 9 -0.98 0.00
 4 18 10 -6.79 0.00
 4 18 11 1.77 0.00
 4 18 12 9.14 0.00
 4 18 13 1.09 0.00
 4 18 14 2.05 0.00
 4 18 15 -1.69 0.00
 4 18 16 1.76 0.00
 4 18 17 2.33 0.00
 4 18 18 2.87 0.00
 4 18 19 -2.99 0.00
 4 20 0 25.99 0.00
 4 20 1 -6.17 0.00
 4 20 2 1.71 0.00
 4 20 3 1.61 0.00
 4 20 4 -4.30 0.00
 4 20 5 13.15 0.00
 4 20 6 -2.15 0.00
 4 20 7 4.62 0.00
 4 20 8 8.59 0.00
 4 20 9 -8.52 0.00
 4 20 10 -4.77 0.00
 4 20 11 2.73 0.00
 4 20 12 0.38 0.00
 4 20 13 6.64 0.00
 4 20 14 -4.42 0.00
 4 20 15 -2.00 0.00
 4 20 16 -1.29 0.00
 4 20 17 4.80 0.00
 4 20 18 0.85 0.00
 4 22 0 -8.79 0.00
 4 22 1 -3.20 0.00
 4 22 2 -7.72 0.00
 4 22 3 7.52 0.00
 4 22 4 -3.90 0.00
 4 22 5 5.26 0.00
 4 22 6 -1.16 0.00
 4 22 7 2.83 0.00
 4 22 8 2.44 0.00
 4 22 9 1.06 0.00
 4 22 10 -5.19 0.00
 4 22 11 2.44 0.00
 4 22 12 -2.05 0.00
 4 22 13 0.94 0.00
 4 22 14 0.26 0.00
 4 22 15 -1.99 0.00
 4 22 16 -2.53 0.00
 4 22 17 1.91 0.00
 4 22 18 3.89 0.00
 4 24 0 -3.38 0.00
 4 24 1 -0.25 0.00
 4 24 2 -3.25 0.00
 4 24 3 9.83 0.00
 4 24 4 -1.75 0.00
 4 24 5 5.52 0.00
 4 24 6 3.08 0.00
 4 24 7 5.81 0.00
 4 24 8 0.09 0.00
 4 24 9 -7.20 0.00
 4 24 10 -2.03 0.00
 4 24 11 -2.00 0.00
 4 24 12 -8.89 0.00
 4 24 13 -3.34 0.00
 4 24 14 2.84 0.00
 4 24 15 -1.31 0.00
 4 24 16 1.88 0.00
 4 24 17 1.03 0.00
 4 26 0 -2.43 0.00
 4 26 1 -7.99 0.00
 4 26 2 -1.90 0.00
 4 26 3 2.49 0.00
 4 26 4 -3.69 0.00
 4 26 5 -1.86 0.00
 4 26 6 6.25 0.00
 4 26 7 5.63 0.00
 4 26 8 -0.73 0.00
 4 26 9 -2.00 0.00
 4 26 10 4.78 0.00
 4 26 11 3.40 0.00
 4 26 12 -4.29 0.00
 4 26 13 -0.93 0.00
 4 26 14 1.48 0.00
 4 26 15 0.77 0.00
 4 26 16 -3.16 0.00
 4 26 17 -6.30 0.00
 4 28 0 -6.32 0.00
 4 28 1 1.85 0.00
 4 28 2 -4.15 0.00
 4 28 3 -3.50 0.00
 4 28 4 -3.69 0.00
 4 28 5 -7.66 0.00
 4 28 6 4.89 0.00
 4 28 7 -0.48 0.00
 4 28 8 -5.96 0.00
 4 28 9 -2.71 0.00
 4 28 10 2.50 0.00
 4 28 11 3.31 0.00
 4 28 12 -7.08 0.00
 4 28 13 0.42 0.00
 4 28 14 -0.03 0.00
 4 28 15 2.88 0.00
 4 28 16 -4.05 0.00
 4 30 0 3.69 0.00
 4 30 1 -4.11 0.00
 4 30 2 1.73 0.00
 4 30 3 -0.75 0.00
 4 30 4 -0.27 0.00
 4 30 5 -7.74 0.00
 4 30 6 4.12 0.00
 4 30 7 2.55 0.00
 4 30 8 -4.02 0.00
 4 30 9 -6.47 0.00
 4 30 10 0.38 0.00
 4 30 11 2.06 0.00
 4 30 12 -1.51 0.00
 4 30 13 -1.22 0.00
 4 30 14 1.29 0.00
 4 30 15 -0.08 0.00
 4 30 16 2.21 0.00
 4 32 0 9.00 0.00
 4 32 1 -6.84 0.00
 4 32 2 10.42 0.00
 4 32 3 1.13 0.00
 4 32 4 -1.48 0.00
 4 32 5 -2.09 0.00
 4 32 6 0.19 0.00
 4 32 7 4.72 0.00
 4 32 8 -2.59 0.00
 4 32 9 1.66 0.00
 4 32 10 1.07 0.00
 4 32 11 -0.98 0.00
 4 32 12 -2.90 0.00
 4 32 13 4.10 0.00
 4 32 14 2.00 0.00
 4 32 15 -2.69 0.00
 4 34 0 2.13 0.00
 4 34 1 3.60 0.00
 4 34 2 4.23 0.00
 4 34 3 0.97 0.00
 4 34 4 1.90 0.00
 4 34 5 -4.55 0.00
 4 34 6 -3.52 0.00
 4 34 7 3.39 0.00
 4 34 8 -0.09 0.00
 4 34 9 -0.97 0.00
 4 34 10 4.42 0.00
 4 34 11 -1.48 0.00
 4 34 12 0.46 0.00
 4 34 13 -1.73 0.00
 4 34 14 0.32 0.00
 4 36 0 7.40 0.00
 4 36 1 -2.58 0.00
 4 36 2 6.66 0.00
 4 36 3 1.34 0.00
 4 36 4 -0.18 0.00
 4 36 5 0.23 0.00
 4 36 6 -6.54 0.00
 4 36 7 0.50 0.00
 4 36 8 1.15 0.00
 4 36 9 3.27 0.00
 4 36 10 -2.47 0.00
 4 36 11 0.00 0.00
 4 36 12 -0.43 0.00
 4 36 13 3.12 0.00
 4 38 0 11.35 0.00
 4 38 1 -1.49 0.00
 4 38 2 6.67 0.00
 4 38 3 0.00 0.00
 4 38 4 1.96 0.00
 4 38 5 1.92 0.00
 4 38 6 -2.36 0.00
 4 38 7 -2.75 0.00
 4 38 8 -0.17 0.00
 4 38 9 -2.76 0.00
 4 38 10 -3.68 0.00
 4 38 11 0.25 0.00
 4 38 12 -0.50 0.00
 4 40 0 5.93 0.00
 4 40 1 3.19 0.00
 4 40 2 0.11 0.00
 4 40 3 -2.45 0.00
 4 40 4 2.95 0.00
 4 40 5 1.39 0.00
 4 40 6 1.35 0.00
 4 40 7 -6.71 0.00
 4 40 8 0.60 0.00
 4 40 9 -3.78 0.00
 4 40 10 -0.22 0.00
 4 40 11 -1.28 0.00
 4 42 0 3.12 0.00
 4 42 1 2.28 0.00
 4 42 2 -0.70 0.00
 4 42 3 1.25 0.00
 4 42 4 0.87 0.00
 4 42 5 6.25 0.00
 4 42 6 2.29 0.00
 4 42 7 -3.56 0.00
 4 42 8 1.89 0.00
 4 42 9 1.54 0.00
 4 42 10 6.03 0.00
 4 44 0 1.15 0.00
 4 44 1 -0.35 0.00
 4 44 2 -2.88 0.00
 4 44 3 0.67 0.00
 4 44 4 -1.20 0.00
 4 44 5 3.64 0.00
 4 44 6 0.85 0.00
 4 44 7 -3.76 0.00
 4 44 8 -0.71 0.00
 4 46 0 1.19 0.00
 4 46 1 -2.93 0.00
 4 46 2 -0.41 0.00
 4 46 3 -2.84 0.00
 4 46 4 2.83 0.00
 4 46 5 -3.72 0.00
 4 46 6 -5.41 0.00
 4 48 1 3.14 0.00
 4 48 2 -7.44 0.00
 5 1 0 121.80 0.00
 5 1 1 29.58 0.00
 5 1 2 10.09 0.00
 5 1 3 -96.63 0.00
 5 1 4 40.90 0.00
 5 1 5 5.99 0.00
 5 1 6 -21.38 0.00
 5 1 7 -21.71 0.00
 5 1 8 24.56 0.00
 5 1 9 6.95 0.00
 5 1 10 10.92 0.00
 5 1 11 -0.12 0.00
 5 1 12 1.34 0.00
 5 1 13 2.76 0.00
 5 1 14 0.71 0.00
 5 1 15 5.29 0.00
 5 1 16 4.13 0.00
 5 1 17 -1.34 0.00
 5 1 18 -4.54 0.00
 5 1 19 6.19 0.00
 5 3 0 27.34 0.00
 5 3 1 0.92 0.00
 5 3 2 -6.46 0.00
 5 3 3 -27.29 0.00
 5 3 4 26.88 0.00
 5 3 5 10.96 0.00
 5 3 6 -14.36 0.00
 5 3 7 -27.13 0.00
 5 3 8 9.06 0.00
 5 3 9 5.18 0.00
 5 3 10 -3.34 0.00
 5 3 11 -3.07 0.00
 5 3 12 -16.14 0.00
 5 3 13 1.06 0.00
 5 3 14 -1.43 0.00
 5 3 15 5.73 0.00
 5 3 16 4.35 0.00
 5 3 17 -3.92 0.00
 5 3 18 2.71 0.00
 5 3 19 -0.05 0.00
 5 5 0 -39.30 0.00
 5 5 1 57.73 0.00
 5 5 2 -4.77 0.00
 5 5 3 33.56 0.00
 5 5 4 20.17 0.00
 5 5 5 12.17 0.00
 5 5 6 -11.54 0.00
 5 5 7 -16.52 0.00
 5 5 8 -13.68 0.00
 5 5 9 1.10 0.00
 5 5 10 1.30 0.00
 5 5 11 3.60 0.00
 5 5 12 -13.67 0.00
 5 5 13 5.53 0.00
 5 5 14 2.03 0.00
 5 5 15 2.34 0.00
 5 5 16 3.51 0.00
 5 5 17 0.61 0.00
 5 5 18 -0.97 0.00
 5 5 19 -0.02 0.00
 5 5 20 -2.20 0.00
 5 7 0 -10.92 0.00
 5 7 1 0.34 0.00
 5 7 2 -18.88 0.00
 5 7 3 -2.42 0.00
 5 7 4 -7.15 0.00
 5 7 5 -7.74 0.00
 5 7 6 -10.32 0.00
 5 7 7 -23.21 0.00
 5 7 8 -12.15 0.00
 5 7 9 -1.67 0.00
 5 7 10 7.64 0.00
 5 7 11 0.34 0.00
 5 7 12 -3.72 0.00
 5 7 13 -0.72 0.00
 5 7 14 9.36 0.00
 5 7 15 1.05 0.00
 5 7 16 1.76 0.00
 5 7 17 -3.40 0.00
 5 7 18 0.97 0.00
 5 7 19 2.84 0.00
 5 7 20 3.89 0.00
 5 9 0 -28.68 0.00
 5 9 1 -8.14 0.00
 5 9 2 -9.69 0.00
 5 9 3 -0.01 0.00
 5 9 4 -5.65 0.00
 5 9 5 -2.74 0.00
 5 9 6 0.39 0.00
 5 9 7 -13.71 0.00
 5 9 8 -7.36 0.00
 5 9 9 -12.17 0.00
 5 9 10 14.34 0.00
 5 9 11 2.59 0.00
 5 9 12 1.00 0.00
 5 9 13 0.60 0.00
 5 9 14 9.15 0.00
 5 9 15 5.20 0.00
 5 9 16 -3.19 0.00
 5 9 17 1.79 0.00
 5 9 18 -2.28 0.00
 5 9 19 4.82 0.00
 5 11 0 0.33 0.00
 5 11 1 8.08 0.00
 5 11 2 -7.64 0.00
 5 11 3 18.74 0.00
 5 11 4 -7.05 0.00
 5 11 5 5.18 0.00
 5 11 6 15.62 0.00
 5 11 7 5.35 0.00
 5 11 8 -1.44 0.00
 5 11 9 -2.62 0.00
 5 11 10 12.79 0.00
 5 11 11 0.79 0.00
 5 11 12 -1.46 0.00
 5 11 13 -3.74 0.00
 5 11 14 6.07 0.00
 5 11 15 5.45 0.00
 5 11 16 -4.27 0.00
 5 11 17 5.24 0.00
 5 11 18 -2.53 0.00
 5 11 19 3.73 0.00
 5 13 0 8.59 0.00
 5 13 1 10.92 0.00
 5 13 2 -1.87 0.00
 5 13 3 2.63 0.00
 5 13 4 6.89 0.00
 5 13 5 -6.06 0.00
 5 13 6 18.95 0.00
 5 13 7 -3.80 0.00
 5 13 8 -4.38 0.00
 5 13 9 0.86 0.00
 5 13 10 1.38 0.00
 5 13 11 1.99 0.00
 5 13 12 -8.72 0.00
 5 13 13 -0.90 0.00
 5 13 14 5.51 0.00
 5 13 15 1.25 0.00
 5 13 16 3.27 0.00
 5 13 17 8.02 0.00
 5 13 18 -0.17 0.00
 5 13 19 -3.94 0.00
 5 15 0 19.61 0.00
 5 15 1 -11.05 0.00
 5 15 2 -5.76 0.00
 5 15 3 -20.44 0.00
 5 15 4 1.25 0.00
 5 15 5 -7.03 0.00
 5 15 6 2.79 0.00
 5 15 7 0.48 0.00
 5 15 8 -15.77 0.00
 5 15 9 -5.49 0.00
 5 15 10 -6.27 0.00
 5 15 11 -0.61 0.00
 5 15 12 -1.22 0.00
 5 15 13 2.37 0.00
 5 15 14 0.92 0.00
 5 15 15 -1.65 0.00
 5 15 16 6.74 0.00
 5 15 17 2.33 0.00
 5 15 18 1.54 0.00
 5 15 19 -4.11 0.00
 5 17 0 23.22 0.00
 5 17 1 -10.85 0.00
 5 17 2 -4.72 0.00
 5 17 3 -19.10 0.00
 5 17 4 14.02 0.00
 5 17 5 -7.03 0.00
 5 17 6 10.45 0.00
 5 17 7 -2.18 0.00
 5 17 8 -0.61 0.00
 5 17 9 2.79 0.00
 5 17 10 -1.41 0.00
 5 17 11 -1.88 0.00
 5 17 12 5.55 0.00
 5 17 13 -0.78 0.00
 5 17 14 -3.11 0.00
 5 17 15 -4.22 0.00
 5 17 16 1.54 0.00
 5 17 17 -1.71 0.00
 5 17 18 0.22 0.00
 5 17 19 -1.55 0.00
 5 19 0 -1.79 0.00
 5 19 1 1.84 0.00
 5 19 2 -10.22 0.00
 5 19 3 -6.45 0.00
 5 19 4 0.52 0.00
 5 19 5 0.04 0.00
 5 19 6 1.14 0.00
 5 19 7 2.16 0.00
 5 19 8 -1.34 0.00
 5 19 9 6.62 0.00
 5 19 10 -0.44 0.00
 5 19 11 -1.53 0.00
 5 19 12 4.13 0.00
 5 19 13 5.55 0.00
 5 19 14 -6.15 0.00
 5 19 15 -0.44 0.00
 5 19 16 1.11 0.00
 5 19 17 -2.04 0.00
 5 19 18 -4.68 0.00
 5 21 0 -1.31 0.00
 5 21 1 7.54 0.00
 5 21 2 5.44 0.00
 5 21 3 4.81 0.00
 5 21 4 9.96 0.00
 5 21 5 4.70 0.00
 5 21 6 -8.63 0.00
 5 21 7 5.13 0.00
 5 21 8 -14.20 0.00
 5 21 9 3.38 0.00
 5 21 10 -5.90 0.00
 5 21 11 -3.70 0.00
 5 21 12 -1.41 0.00
 5 21 13 0.15 0.00
 5 21 14 -1.52 0.00
 5 21 15 0.18 0.00
 5 21 16 2.93 0.00
 5 21 17 0.33 0.00
 5 21 18 -2.34 0.00
 5 23 0 -4.30 0.00
 5 23 1 3.14 0.00
 5 23 2 2.23 0.00
 5 23 3 5.14 0.00
 5 23 4 4.80 0.00
 5 23 5 -3.93 0.00
 5 23 6 1.65 0.00
 5 23 7 0.13 0.00
 5 23 8 1.03 0.00
 5 23 9 3.50 0.00
 5 23 10 -1.36 0.00
 5 23 11 -8.62 0.00
 5 23 12 0.31 0.00
 5 23 13 -3.99 0.00
 5 23 14 -0.88 0.00
 5 23 15 -0.73 0.00
 5 23 16 6.42 0.00
 5 23 17 -3.64 0.00
 5 25 0 -9.96 0.00
 5 25 1 -3.89 0.00
 5 25 2 3.42 0.00
 5 25 3 -5.44 0.00
 5 25 4 -3.53 0.00
 5 25 5 -3.63 0.00
 5 25 6 1.88 0.00
 5 25 7 -5.75 0.00
 5 25 8 7.21 0.00
 5 25 9 -0.80 0.00
 5 25 10 3.48 0.00
 5 25 11 -1.93 0.00
 5 25 12 -2.11 0.00
 5 25 13 -3.90 0.00
 5 25 14 -0.76 0.00
 5 25 15 -0.70 0.00
 5 25 16 -0.09 0.00
 5 25 17 -5.46 0.00
 5 27 0 -3.34 0.00
 5 27 1 1.41 0.00
 5 27 2 3.42 0.00
 5 27 3 -1.87 0.00
 5 27 4 0.19 0.00
 5 27 5 -3.42 0.00
 5 27 6 1.45 0.00
 5 27 7 1.50 0.00
 5 27 8 -4.65 0.00
 5 27 9 -0.41 0.00
 5 27 10 -2.31 0.00
 5 27 11 -1.99 0.00
 5 27 12 1.03 0.00
 5 27 13 -4.05 0.00
 5 27 14 -1.59 0.00
 5 27 15 5.15 0.00
 5 27 16 1.04 0.00
 5 29 0 1.48 0.00
 5 29 1 0.56 0.00
 5 29 2 6.24 0.00
 5 29 3 1.44 0.00
 5 29 4 -2.49 0.00
 5 29 5 1.44 0.00
 5 29 6 0.86 0.00
 5 29 7 3.44 0.00
 5 29 8 -0.59 0.00
 5 29 9 0.22 0.00
 5 29 10 -3.49 0.00
 5 29 11 2.37 0.00
 5 29 12 0.72 0.00
 5 29 13 2.24 0.00
 5 29 14 -0.82 0.00
 5 29 15 1.38 0.00
 5 29 16 1.00 0.00
 5 31 0 -1.45 0.00
 5 31 1 -3.82 0.00
 5 31 2 4.20 0.00
 5 31 3 -0.40 0.00
 5 31 4 1.07 0.00
 5 31 5 -2.40 0.00
 5 31 6 -0.91 0.00
 5 31 7 3.14 0.00
 5 31 8 -3.99 0.00
 5 31 9 -0.36 0.00
 5 31 10 -3.22 0.00
 5 31 11 3.54 0.00
 5 31 12 3.21 0.00
 5 31 13 -1.59 0.00
 5 31 14 4.20 0.00
 5 31 15 -3.97 0.00
 5 33 0 -4.57 0.00
 5 33 1 4.92 0.00
 5 33 2 3.30 0.00
 5 33 3 7.26 0.00
 5 33 4 -1.98 0.00
 5 33 5 -3.38 0.00
 5 33 6 -3.13 0.00
 5 33 7 2.66 0.00
 5 33 8 3.39 0.00
 5 33 9 0.56 0.00
 5 33 10 0.42 0.00
 5 33 11 -0.17 0.00
 5 33 12 4.90 0.00
 5 33 13 -0.54 0.00
 5 33 14 3.85 0.00
 5 35 0 -4.66 0.00
 5 35 1 13.38 0.00
 5 35 2 -2.55 0.00
 5 35 3 8.85 0.00
 5 35 4 -5.58 0.00
 5 35 5 -1.31 0.00
 5 35 6 -2.67 0.00
 5 35 7 -2.57 0.00
 5 35 8 3.67 0.00
 5 35 9 3.60 0.00
 5 35 10 1.10 0.00
 5 35 11 -0.69 0.00
 5 35 12 0.85 0.00
 5 35 13 2.64 0.00
 5 35 14 -4.01 0.00
 5 37 0 -0.87 0.00
 5 37 1 5.63 0.00
 5 37 2 0.58 0.00
 5 37 3 6.11 0.00
 5 37 4 0.43 0.00
 5 37 5 0.23 0.00
 5 37 6 -1.96 0.00
 5 37 7 -1.54 0.00
 5 37 8 1.22 0.00
 5 37 9 0.58 0.00
 5 37 10 -3.95 0.00
 5 37 11 -0.80 0.00
 5 37 12 -2.41 0.00
 5 37 13 2.47 0.00
 5 39 0 3.34 0.00
 5 39 1 7.63 0.00
 5 39 2 3.97 0.00
 5 39 3 -1.79 0.00
 5 39 4 3.12 0.00
 5 39 5 -1.33 0.00
 5 39 6 1.71 0.00
 5 39 7 -1.59 0.00
 5 39 8 -1.84 0.00
 5 39 9 -6.00 0.00
 5 39 10 3.47 0.00
 5 39 11 -0.93 0.00
 5 41 0 -0.39 0.00
 5 41 1 -4.38 0.00
 5 41 2 -3.02 0.00
 5 41 3 -1.45 0.00
 5 41 4 -0.48 0.00
 5 41 5 5.77 0.00
 5 41 6 5.15 0.00
 5 41 7 1.54 0.00
 5 41 8 1.00 0.00
 5 41 9 0.51 0.00
 5 41 10 1.81 0.00
 5 43 0 -3.52 0.00
 5 43 1 -0.14 0.00
 5 43 2 -4.47 0.00
 5 43 3 -4.16 0.00
 5 43 4 -2.43 0.00
 5 43 5 3.80 0.00
 5 43 6 -2.72 0.00
 5 43 7 3.28 0.00
 5 43 8 -4.14 0.00
 5 43 9 -4.31 0.00
 5 45 0 -1.33 0.00
 5 45 1 1.97 0.00
 5 45 2 4.48 0.00
 5 45 3 -0.46 0.00
 5 45 4 3.00 0.00
 5 45 5 0.93 0.00
 5 45 6 -4.10 0.00
 5 45 7 0.84 0.00
 5 47 0 4.69 0.00
 5 47 1 -4.54 0.00
 5 47 2 -3.19 0.00
 5 47 3 -4.23 0.00
 5 47 4 4.90 0.00
 6 0 0 53.13 0.00
 6 0 1 30.36 0.00
 6 0 2 -90.43 0.00
 6 0 3 10.31 0.00
 6 0 4 32.65 0.00
 6 0 5 -3.11 0.00
 6 0 6 -12.12 0.00
 6 0 7 -5.01 0.00
 6 0 8 -2.33 0.00
 6 0 9 10.04 0.00
 6 0 10 -2.32 0.00
 6 0 11 -6.45 0.00
 6 0 12 3.20 0.00
 6 0 13 -5.14 0.00
 6 0 14 3.59 0.00
 6 0 15 2.77 0.00
 6 0 16 9.04 0.00
 6 0 17 -2.33 0.00
 6 0 18 0.39 0.00
 6 0 19 -6.18 0.00
 6 2 0 -120.45 0.00
 6 2 1 0.61 0.00
 6 2 2 -47.57 0.00
 6 2 3 22.11 0.00
 6 2 4 23.54 0.00
 6 2 5 0.86 0.00
 6 2 6 -5.44 0.00
 6 2 7 5.31 0.00
 6 2 8 -5.87 0.00
 6 2 9 4.91 0.00
 6 2 10 7.56 0.00
 6 2 11 -4.12 0.00
 6 2 12 -0.45 0.00
 6 2 13 -3.57 0.00
 6 2 14 2.57 0.00
 6 2 15 6.77 0.00
 6 2 16 5.73 0.00
 6 2 17 0.90 0.00
 6 2 18 -0.33 0.00
 6 2 19 -5.29 0.00
 6 4 0 -39.49 0.00
 6 4 1 -9.72 0.00
 6 4 2 -28.99 0.00
 6 4 3 10.79 0.00
 6 4 4 17.50 0.00
 6 4 5 11.40 0.00
 6 4 6 -13.56 0.00
 6 4 7 -8.92 0.00
 6 4 8 -10.36 0.00
 6 4 9 8.76 0.00
 6 4 10 -0.79 0.00
 6 4 11 -4.99 0.00
 6 4 12 -4.34 0.00
 6 4 13 -3.08 0.00
 6 4 14 -1.47 0.00
 6 4 15 4.15 0.00
 6 4 16 4.33 0.00
 6 4 17 -4.86 0.00
 6 4 18 2.67 0.00
 6 4 19 1.17 0.00
 6 6 0 17.38 0.00
 6 6 1 -4.38 0.00
 6 6 2 60.31 0.00
 6 6 3 9.00 0.00
 6 6 4 -4.64 0.00
 6 6 5 -3.49 0.00
 6 6 6 4.77 0.00
 6 6 7 -21.71 0.00
 6 6 8 -11.26 0.00
 6 6 9 2.28 0.00
 6 6 10 -1.35 0.00
 6 6 11 0.80 0.00
 6 6 12 -2.99 0.00
 6 6 13 0.29 0.00
 6 6 14 -0.83 0.00
 6 6 15 4.34 0.00
 6 6 16 -4.67 0.00
 6 6 17 0.23 0.00
 6 6 18 -0.65 0.00
 6 6 19 3.47 0.00
 6 6 20 -5.07 0.00
 6 8 0 3.43 0.00
 6 8 1 20.80 0.00
 6 8 2 40.34 0.00
 6 8 3 -0.23 0.00
 6 8 4 -8.55 0.00
 6 8 5 5.21 0.00
 6 8 6 0.11 0.00
 6 8 7 -8.24 0.00
 6 8 8 -8.44 0.00
 6 8 9 -3.25 0.00
 6 8 10 0.75 0.00
 6 8 11 -4.33 0.00
 6 8 12 3.93 0.00
 6 8 13 -3.24 0.00
 6 8 14 3.67 0.00
 6 8 15 6.10 0.00
 6 8 16 -3.92 0.00
 6 8 17 -1.90 0.00
 6 8 18 0.12 0.00
 6 8 19 8.01 0.00
 6 10 0 20.90 0.00
 6 10 1 2.24 0.00
 6 10 2 4.96 0.00
 6 10 3 -0.93 0.00
 6 10 4 -39.49 0.00
 6 10 5 2.95 0.00
 6 10 6 3.08 0.00
 6 10 7 12.28 0.00
 6 10 8 -4.16 0.00
 6 10 9 -7.21 0.00
 6 10 10 0.67 0.00
 6 10 11 1.50 0.00
 6 10 12 -4.46 0.00
 6 10 13 0.43 0.00
 6 10 14 5.32 0.00
 6 10 15 4.57 0.00
 6 10 16 -6.56 0.00
 6 10 17 2.03 0.00
 6 10 18 2.23 0.00
 6 10 19 4.12 0.00
 6 12 0 17.58 0.00
 6 12 1 -6.97 0.00
 6 12 2 8.74 0.00
 6 12 3 -13.85 0.00
 6 12 4 -29.66 0.00
 6 12 5 7.84 0.00
 6 12 6 2.50 0.00
 6 12 7 7.45 0.00
 6 12 8 -0.85 0.00
 6 12 9 -0.36 0.00
 6 12 10 0.27 0.00
 6 12 11 5.22 0.00
 6 12 12 3.43 0.00
 6 12 13 0.96 0.00
 6 12 14 3.50 0.00
 6 12 15 2.74 0.00
 6 12 16 -2.19 0.00
 6 12 17 -3.33 0.00
 6 12 18 1.26 0.00
 6 12 19 -1.98 0.00
 6 14 0 38.92 0.00
 6 14 1 -8.14 0.00
 6 14 2 -10.46 0.00
 6 14 3 -5.37 0.00
 6 14 4 -8.37 0.00
 6 14 5 8.91 0.00
 6 14 6 0.82 0.00
 6 14 7 6.50 0.00
 6 14 8 6.83 0.00
 6 14 9 -4.93 0.00
 6 14 10 -0.34 0.00
 6 14 11 0.72 0.00
 6 14 12 -1.84 0.00
 6 14 13 -4.66 0.00
 6 14 14 -4.45 0.00
 6 14 15 0.47 0.00
 6 14 16 0.65 0.00
 6 14 17 -2.01 0.00
 6 14 18 0.41 0.00
 6 14 19 -1.19 0.00
 6 16 0 28.16 0.00
 6 16 1 2.89 0.00
 6 16 2 -16.12 0.00
 6 16 3 -8.60 0.00
 6 16 4 2.20 0.00
 6 16 5 10.11 0.00
 6 16 6 6.03 0.00
 6 16 7 1.93 0.00
 6 16 8 2.48 0.00
 6 16 9 0.59 0.00
 6 16 10 -4.65 0.00
 6 16 11 0.53 0.00
 6 16 12 7.22 0.00
 6 16 13 2.22 0.00
 6 16 14 -7.77 0.00
 6 16 15 -1.67 0.00
 6 16 16 2.06 0.00
 6 16 17 -3.09 0.00
 6 16 18 -0.60 0.00
 6 16 19 -2.37 0.00
 6 18 0 11.21 0.00
 6 18 1 4.63 0.00
 6 18 2 -20.09 0.00
 6 18 3 4.97 0.00
 6 18 4 10.64 0.00
 6 18 5 1.56 0.00
 6 18 6 -6.56 0.00
 6 18 7 -0.23 0.00
 6 18 8 1.84 0.00
 6 18 9 5.58 0.00
 6 18 10 -4.35 0.00
 6 18 11 -2.63 0.00
 6 18 12 -0.33 0.00
 6 18 13 -3.36 0.00
 6 18 14 -2.14 0.00
 6 18 15 -0.99 0.00
 6 18 16 1.17 0.00
 6 18 17 0.42 0.00
 6 18 18 0.28 0.00
 6 20 0 4.22 0.00
 6 20 1 -3.23 0.00
 6 20 2 -13.72 0.00
 6 20 3 6.60 0.00
 6 20 4 3.94 0.00
 6 20 5 7.12 0.00
 6 20 6 -5.67 0.00
 6 20 7 -0.11 0.00
 6 20 8 -0.88 0.00
 6 20 9 -3.34 0.00
 6 20 10 -0.51 0.00
 6 20 11 -4.30 0.00
 6 20 12 -3.30 0.00
 6 20 13 1.60 0.00
 6 20 14 -0.33 0.00
 6 20 15 0.19 0.00
 6 20 16 -0.79 0.00
 6 20 17 3.36 0.00
 6 20 18 -4.23 0.00
 6 22 0 -3.19 0.00
 6 22 1 1.19 0.00
 6 22 2 -4.98 0.00
 6 22 3 3.52 0.00
 6 22 4 12.07 0.00
 6 22 5 -13.09 0.00
 6 22 6 -3.54 0.00
 6 22 7 -4.76 0.00
 6 22 8 -2.04 0.00
 6 22 9 5.98 0.00
 6 22 10 2.26 0.00
 6 22 11 -5.49 0.00
 6 22 12 3.36 0.00
 6 22 13 -1.03 0.00
 6 22 14 2.64 0.00
 6 22 15 0.54 0.00
 6 22 16 -2.49 0.00
 6 22 17 -4.61 0.00
 6 24 0 1.64 0.00
 6 24 1 -2.75 0.00
 6 24 2 7.29 0.00
 6 24 3 -1.75 0.00
 6 24 4 2.98 0.00
 6 24 5 -11.32 0.00
 6 24 6 -2.08 0.00
 6 24 7 -5.99 0.00
 6 24 8 1.20 0.00
 6 24 9 -1.48 0.00
 6 24 10 3.75 0.00
 6 24 11 -3.70 0.00
 6 24 12 -5.57 0.00
 6 24 13 -1.97 0.00
 6 24 14 -1.71 0.00
 6 24 15 1.12 0.00
 6 24 16 0.79 0.00
 6 24 17 -0.83 0.00
 6 26 0 3.55 0.00
 6 26 1 -0.40 0.00
 6 26 2 5.42 0.00
 6 26 3 1.87 0.00
 6 26 4 -1.46 0.00
 6 26 5 -1.96 0.00
 6 26 6 -0.95 0.00
 6 26 7 3.71 0.00
 6 26 8 -0.99 0.00
 6 26 9 1.59 0.00
 6 26 10 4.61 0.00
 6 26 11 -0.42 0.00
 6 26 12 -0.28 0.00
 6 26 13 -1.58 0.00
 6 26 14 -3.19 0.00
 6 26 15 0.20 0.00
 6 26 16 1.22 0.00
 6 28 0 -8.01 0.00
 6 28 1 1.80 0.00
 6 28 2 4.73 0.00
 6 28 3 0.39 0.00
 6 28 4 -6.32 0.00
 6 28 5 0.54 0.00
 6 28 6 -2.46 0.00
 6 28 7 -1.55 0.00
 6 28 8 -2.05 0.00
 6 28 9 -1.71 0.00
 6 28 10 3.86 0.00
 6 28 11 -0.73 0.00
 6 28 12 1.44 0.00
 6 28 13 -5.19 0.00
 6 28 14 0.93 0.00
 6 28 15 0.14 0.00
 6 28 16 2.42 0.00
 6 30 0 -1.69 0.00
 6 30 1 -0.78 0.00
 6 30 2 5.27 0.00
 6 30 3 1.34 0.00
 6 30 4 -1.42 0.00
 6 30 5 0.17 0.00
 6 30 6 1.41 0.00
 6 30 7 -2.75 0.00
 6 30 8 -0.36 0.00
 6 30 9 -6.54 0.00
 6 30 10 -2.69 0.00
 6 30 11 5.64 0.00
 6 30 12 4.56 0.00
 6 30 13 -0.91 0.00
 6 30 14 0.92 0.00
 6 30 15 1.58 0.00
 6 32 0 -1.69 0.00
 6 32 1 -1.00 0.00
 6 32 2 13.27 0.00
 6 32 3 3.77 0.00
 6 32 4 1.47 0.00
 6 32 5 1.40 0.00
 6 32 6 2.64 0.00
 6 32 7 1.22 0.00
 6 32 8 2.38 0.00
 6 32 9 1.40 0.00
 6 32 10 -1.93 0.00
 6 32 11 1.27 0.00
 6 32 12 1.16 0.00
 6 32 13 3.41 0.00
 6 32 14 1.46 0.00
 6 32 15 2.14 0.00
 6 34 0 -3.40 0.00
 6 34 1 4.33 0.00
 6 34 2 4.93 0.00
 6 34 3 0.34 0.00
 6 34 4 4.96 0.00
 6 34 5 -2.87 0.00
 6 34 6 1.61 0.00
 6 34 7 -0.85 0.00
 6 34 8 4.19 0.00
 6 34 9 -1.42 0.00
 6 34 10 0.57 0.00
 6 34 11 -1.27 0.00
 6 34 12 -1.68 0.00
 6 34 13 -3.56 0.00
 6 34 14 1.26 0.00
 6 36 1 -2.98 0.00
 6 36 2 9.87 0.00
 6 36 3 -1.39 0.00
 6 36 4 4.21 0.00
 6 36 5 -3.19 0.00
 6 36 6 -3.17 0.00
 6 36 7 -0.79 0.00
 6 36 8 1.46 0.00
 6 36 9 3.00 0.00
 6 36 10 -2.75 0.00
 6 36 11 -4.26 0.00
 6 36 12 0.29 0.00
 6 36 13 2.82 0.00
 6 38 0 9.90 0.00
 6 38 1 -5.22 0.00
 6 38 2 2.19 0.00
 6 38 3 0.51 0.00
 6 38 4 1.11 0.00
 6 38 5 1.55 0.00
 6 38 6 -1.63 0.00
 6 38 7 -0.02 0.00
 6 38 8 -0.88 0.00
 6 38 9 2.10 0.00
 6 38 10 1.95 0.00
 6 38 11 1.23 0.00
 6 40 0 -1.22 0.00
 6 40 1 3.28 0.00
 6 40 2 -4.90 0.00
 6 40 3 0.08 0.00
 6 40 4 0.89 0.00
 6 40 5 2.75 0.00
 6 40 6 1.69 0.00
 6 40 7 2.78 0.00
 6 40 8 -4.25 0.00
 6 40 9 -0.11 0.00
 6 40 10 3.30 0.00
 6 42 0 0.87 0.00
 6 42 1 1.73 0.00
 6 42 2 -6.06 0.00
 6 42 3 0.30 0.00
 6 42 4 -0.55 0.00
 6 42 5 0.39 0.00
 6 42 6 4.64 0.00
 6 42 7 0.54 0.00
 6 42 8 -4.83 0.00
 6 42 9 -3.59 0.00
 6 44 0 -0.15 0.00
 6 44 1 -1.39 0.00
 6 44 2 -3.19 0.00
 6 44 3 -1.38 0.00
 6 44 4 -0.67 0.00
 6 44 5 -0.66 0.00
 6 44 6 7.61 0.00
 6 44 7 6.31 0.00
 6 46 0 4.58 0.00
 6 46 1 -2.01 0.00
 6 46 2 -1.88 0.00
 6 46 3 0.24 0.00
 6 46 4 2.36 0.00
 6 46 5 1.56 0.00
 7 1 0 -13.40 0.00
 7 1 1 -1.85 0.00
 7 1 2 -8.33 0.00
 7 1 3 28.19 0.00
 7 1 4 -8.20 0.00
 7 1 5 24.27 0.00
 7 1 6 -19.00 0.00
 7 1 7 -19.90 0.00
 7 1 8 0.63 0.00
 7 1 9 2.60 0.00
 7 1 10 -6.64 0.00
 7 1 11 7.15 0.00
 7 1 12 -1.10 0.00
 7 1 13 -0.74 0.00
 7 1 14 6.34 0.00
 7 1 15 -2.26 0.00
 7 1 16 1.80 0.00
 7 1 17 -0.43 0.00
 7 1 18 -6.46 0.00
 7 1 19 -8.10 0.00
 7 3 0 -20.40 0.00
 7 3 1 -59.85 0.00
 7 3 2 0.51 0.00
 7 3 3 18.37 0.00
 7 3 4 9.26 0.00
 7 3 5 20.80 0.00
 7 3 6 2.90 0.00
 7 3 7 -19.42 0.00
 7 3 8 6.39 0.00
 7 3 9 -1.10 0.00
 7 3 10 1.61 0.00
 7 3 11 -8.65 0.00
 7 3 12 -0.05 0.00
 7 3 13 -7.18 0.00
 7 3 14 6.06 0.00
 7 3 15 3.95 0.00
 7 3 16 -1.40 0.00
 7 3 17 3.93 0.00
 7 3 18 3.03 0.00
 7 3 19 -4.13 0.00
 7 5 0 -57.38 0.00
 7 5 1 -29.33 0.00
 7 5 2 -8.06 0.00
 7 5 3 0.81 0.00
 7 5 4 0.95 0.00
 7 5 5 4.61 0.00
 7 5 6 4.35 0.00
 7 5 7 -9.67 0.00
 7 5 8 6.22 0.00
 7 5 9 -3.99 0.00
 7 5 10 13.67 0.00
 7 5 11 -4.36 0.00
 7 5 12 0.38 0.00
 7 5 13 -6.01 0.00
 7 5 14 3.44 0.00
 7 5 15 -2.69 0.00
 7 5 16 -6.73 0.00
 7 5 17 7.68 0.00
 7 5 18 -3.22 0.00
 7 5 19 3.40 0.00
 7 7 0 11.42 0.00
 7 7 1 -34.06 0.00
 7 7 2 11.12 0.00
 7 7 3 -2.43 0.00
 7 7 4 -6.46 0.00
 7 7 5 5.15 0.00
 7 7 6 -1.99 0.00
 7 7 7 8.70 0.00
 7 7 8 2.75 0.00
 7 7 9 0.73 0.00
 7 7 10 -0.49 0.00
 7 7 11 -4.69 0.00
 7 7 12 -0.43 0.00
 7 7 13 -1.82 0.00
 7 7 14 -0.42 0.00
 7 7 15 4.89 0.00
 7 7 16 -4.22 0.00
 7 7 17 -0.18 0.00
 7 7 18 2.88 0.00
 7 7 19 3.17 0.00
 7 9 0 9.61 0.00
 7 9 1 -10.30 0.00
 7 9 2 19.75 0.00
 7 9 3 -16.23 0.00
 7 9 4 -1.49 0.00
 7 9 5 -2.95 0.00
 7 9 6 8.30 0.00
 7 9 7 12.23 0.00
 7 9 8 0.05 0.00
 7 9 9 -3.93 0.00
 7 9 10 -8.16 0.00
 7 9 11 9.53 0.00
 7 9 12 -9.32 0.00
 7 9 13 10.93 0.00
 7 9 14 -0.85 0.00
 7 9 15 5.70 0.00
 7 9 16 -1.37 0.00
 7 9 17 -5.94 0.00
 7 9 18 5.22 0.00
 7 9 19 3.08 0.00
 7 11 0 11.51 0.00
 7 11 1 1.80 0.00
 7 11 2 7.43 0.00
 7 11 3 -19.75 0.00
 7 11 4 -5.86 0.00
 7 11 5 -16.43 0.00
 7 11 6 9.47 0.00
 7 11 7 16.22 0.00
 7 11 8 -6.13 0.00
 7 11 9 -2.73 0.00
 7 11 10 -5.32 0.00
 7 11 11 2.00 0.00
 7 11 12 -3.30 0.00
 7 11 13 3.70 0.00
 7 11 14 -1.53 0.00
 7 11 15 -2.23 0.00
 7 11 16 -3.42 0.00
 7 11 17 -11.37 0.00
 7 11 18 -0.74 0.00
 7 11 19 -0.11 0.00
 7 13 0 5.67 0.00
 7 13 1 13.02 0.00
 7 13 2 -1.13 0.00
 7 13 3 -17.45 0.00
 7 13 4 5.27 0.00
 7 13 5 -9.15 0.00
 7 13 6 5.02 0.00
 7 13 7 3.57 0.00
 7 13 8 -0.81 0.00
 7 13 9 -3.19 0.00
 7 13 10 9.80 0.00
 7 13 11 2.90 0.00
 7 13 12 -0.51 0.00
 7 13 13 2.91 0.00
 7 13 14 1.72 0.00
 7 13 15 -2.77 0.00
 7 13 16 -2.11 0.00
 7 13 17 0.46 0.00
 7 13 18 -6.81 0.00
 7 13 19 1.82 0.00
 7 15 0 8.79 0.00
 7 15 1 26.35 0.00
 7 15 2 -4.79 0.00
 7 15 3 -3.11 0.00
 7 15 4 -10.56 0.00
 7 15 5 3.98 0.00
 7 15 6 -12.45 0.00
 7 15 7 6.31 0.00
 7 15 8 -7.29 0.00
 7 15 9 -5.49 0.00
 7 15 10 5.25 0.00
 7 15 11 -1.63 0.00
 7 15 12 0.39 0.00
 7 15 13 -2.14 0.00
 7 15 14 -0.12 0.00
 7 15 15 -6.42 0.00
 7 15 16 -0.20 0.00
 7 15 17 5.33 0.00
 7 15 18 -12.71 0.00
 7 17 0 8.23 0.00
 7 17 1 13.34 0.00
 7 17 2 -3.37 0.00
 7 17 3 -2.15 0.00
 7 17 4 4.54 0.00
 7 17 5 3.13 0.00
 7 17 6 -7.68 0.00
 7 17 7 -2.11 0.00
 7 17 8 0.84 0.00
 7 17 9 -3.45 0.00
 7 17 10 2.42 0.00
 7 17 11 -3.37 0.00
 7 17 12 -2.30 0.00
 7 17 13 -2.92 0.00
 7 17 14 -0.18 0.00
 7 17 15 -3.53 0.00
 7 17 16 1.57 0.00
 7 17 17 -1.11 0.00
 7 17 18 0.82 0.00
 7 19 0 4.09 0.00
 7 19 1 2.65 0.00
 7 19 2 2.72 0.00
 7 19 3 -1.26 0.00
 7 19 4 -0.66 0.00
 7 19 5 3.06 0.00
 7 19 6 1.52 0.00
 7 19 7 -6.25 0.00
 7 19 8 4.55 0.00
 7 19 9 1.72 0.00
 7 19 10 -2.50 0.00
 7 19 11 -0.31 0.00
 7 19 13 3.05 0.00
 7 19 14 -0.37 0.00
 7 19 15 -2.94 0.00
 7 19 16 3.97 0.00
 7 19 17 -1.97 0.00
 7 19 18 -2.13 0.00
 7 21 0 -2.98 0.00
 7 21 1 -7.75 0.00
 7 21 2 7.50 0.00
 7 21 3 -3.37 0.00
 7 21 4 0.91 0.00
 7 21 5 0.75 0.00
 7 21 6 -9.31 0.00
 7 21 7 -5.94 0.00
 7 21 8 -2.96 0.00
 7 21 9 -3.67 0.00
 7 21 10 -0.48 0.00
 7 21 11 -1.53 0.00
 7 21 13 4.30 0.00
 7 21 14 3.04 0.00
 7 21 15 -1.67 0.00
 7 21 16 -1.92 0.00
 7 21 17 -0.19 0.00
 7 23 0 -5.33 0.00
 7 23 1 -1.10 0.00
 7 23 2 0.71 0.00
 7 23 3 4.63 0.00
 7 23 4 -3.95 0.00
 7 23 5 -0.37 0.00
 7 23 6 2.90 0.00
 7 23 7 -5.42 0.00
 7 23 8 6.82 0.00
 7 23 9 0.69 0.00
 7 23 10 1.65 0.00
 7 23 11 -1.63 0.00
 7 23 12 0.24 0.00
 7 23 13 2.42 0.00
 7 23 14 0.71 0.00
 7 23 15 1.99 0.00
 7 23 16 -1.67 0.00
 7 23 17 4.46 0.00
 7 25 0 -5.94 0.00
 7 25 1 -3.68 0.00
 7 25 2 4.52 0.00
 7 25 3 0.81 0.00
 7 25 4 -5.49 0.00
 7 25 5 4.79 0.00
 7 25 6 2.42 0.00
 7 25 7 -2.84 0.00
 7 25 8 4.86 0.00
 7 25 9 4.53 0.00
 7 25 10 -2.03 0.00
 7 25 11 5.95 0.00
 7 25 12 -5.30 0.00
 7 25 13 1.92 0.00
 7 25 14 -3.66 0.00
 7 25 15 2.98 0.00
 7 25 16 -5.75 0.00
 7 27 0 0.03 0.00
 7 27 1 -1.31 0.00
 7 27 2 2.71 0.00
 7 27 3 0.11 0.00
 7 27 4 -2.02 0.00
 7 27 5 0.83 0.00
 7 27 6 -2.09 0.00
 7 27 7 1.08 0.00
 7 27 8 -7.53 0.00
 7 27 9 3.12 0.00
 7 27 10 0.26 0.00
 7 27 11 1.77 0.00
 7 27 12 1.38 0.00
 7 27 13 -3.36 0.00
 7 27 14 -3.89 0.00
 7 27 15 1.96 0.00
 7 27 16 -0.46 0.00
 7 29 0 -0.92 0.00
 7 29 1 2.97 0.00
 7 29 2 -2.54 0.00
 7 29 3 0.65 0.00
 7 29 4 -4.51 0.00
 7 29 5 -1.04 0.00
 7 29 6 -2.50 0.00
 7 29 7 -1.74 0.00
 7 29 8 -0.39 0.00
 7 29 9 -1.41 0.00
 7 29 10 3.48 0.00
 7 29 11 0.45 0.00
 7 29 12 -0.14 0.00
 7 29 13 0.42 0.00
 7 29 14 -4.60 0.00
 7 29 15 0.88 0.00
 7 31 0 -3.47 0.00
 7 31 1 3.91 0.00
 7 31 2 -5.90 0.00
 7 31 3 3.27 0.00
 7 31 4 -0.04 0.00
 7 31 5 -1.94 0.00
 7 31 6 1.64 0.00
 7 31 7 -0.60 0.00
 7 31 8 -1.48 0.00
 7 31 9 -2.69 0.00
 7 31 10 0.61 0.00
 7 31 11 1.72 0.00
 7 31 12 -1.52 0.00
 7 31 13 2.69 0.00
 7 31 14 -2.97 0.00
 7 31 15 -1.96 0.00
 7 33 0 5.18 0.00
 7 33 1 6.57 0.00
 7 33 2 3.20 0.00
 7 33 3 6.47 0.00
 7 33 4 4.82 0.00
 7 33 5 -0.77 0.00
 7 33 6 -1.21 0.00
 7 33 7 1.13 0.00
 7 33 8 0.00 0.00
 7 33 9 -3.61 0.00
 7 33 10 -5.09 0.00
 7 33 11 -2.53 0.00
 7 33 12 -5.63 0.00
 7 33 13 3.43 0.00
 7 33 14 -1.57 0.00
 7 35 0 4.09 0.00
 7 35 1 4.72 0.00
 7 35 2 -1.01 0.00
 7 35 3 3.69 0.00
 7 35 4 1.50 0.00
 7 35 5 -0.38 0.00
 7 35 6 0.93 0.00
 7 35 7 -0.49 0.00
 7 35 8 1.10 0.00
 7 35 9 2.89 0.00
 7 35 10 -4.16 0.00
 7 35 11 -9.05 0.00
 7 35 12 -3.26 0.00
 7 35 13 -0.38 0.00
 7 37 1 1.27 0.00
 7 37 2 -5.05 0.00
 7 37 3 2.09 0.00
 7 37 4 2.72 0.00
 7 37 5 0.04 0.00
 7 37 6 0.35 0.00
 7 37 7 -2.14 0.00
 7 37 8 5.03 0.00
 7 37 9 3.28 0.00
 7 37 10 4.28 0.00
 7 37 11 -3.35 0.00
 7 37 12 7.28 0.00
 7 39 0 1.94 0.00
 7 39 1 6.83 0.00
 7 39 2 1.86 0.00
 7 39 3 1.06 0.00
 7 39 4 2.15 0.00
 7 39 5 -0.77 0.00
 7 39 6 1.79 0.00
 7 39 7 0.44 0.00
 7 39 8 -4.21 0.00
 7 39 9 3.98 0.00
 7 39 10 3.16 0.00
 7 41 0 -0.15 0.00
 7 41 1 -1.23 0.00
 7 41 2 -0.20 0.00
 7 41 3 1.06 0.00
 7 41 4 -1.74 0.00
 7 41 5 3.37 0.00
 7 41 6 5.62 0.00
 7 41 7 0.86 0.00
 7 41 8 -3.16 0.00
 7 41 9 2.38 0.00
 7 43 0 4.14 0.00
 7 43 1 2.15 0.00
 7 43 2 0.92 0.00
 7 43 3 -1.87 0.00
 7 43 4 -1.10 0.00
 7 43 5 0.41 0.00
 7 43 6 5.61 0.00
 7 43 7 0.44 0.00
 7 43 8 0.69 0.00
 7 45 0 -1.90 0.00
 7 45 1 -1.56 0.00
 7 45 2 1.42 0.00
 7 45 3 -0.78 0.00
 7 45 4 -1.34 0.00
 7 45 5 0.16 0.00
 7 45 6 1.52 0.00
 7 47 0 2.25 0.00
 7 47 1 -8.65 0.00
 8 0 0 110.88 0.00
 8 0 1 4.30 0.00
 8 0 2 -18.55 0.00
 8 0 3 -27.48 0.00
 8 0 4 -15.35 0.00
 8 0 5 -24.00 0.00
 8 0 6 -9.46 0.00
 8 0 7 0.07 0.00
 8 0 8 6.95 0.00
 8 0 9 -0.30 0.00
 8 0 10 1.96 0.00
 8 0 11 10.01 0.00
 8 0 12 -1.37 0.00
 8 0 13 6.24 0.00
 8 0 14 5.03 0.00
 8 0 15 -1.67 0.00
 8 0 16 -4.01 0.00
 8 0 17 -2.47 0.00
 8 0 18 -2.93 0.00
 8 2 0 50.39 0.00
 8 2 1 -7.56 0.00
 8 2 2 -5.35 0.00
 8 2 3 -2.79 0.00
 8 2 4 -9.80 0.00
 8 2 5 -6.57 0.00
 8 2 6 2.51 0.00
 8 2 7 5.54 0.00
 8 2 8 -3.15 0.00
 8 2 9 -6.08 0.00
 8 2 10 5.68 0.00
 8 2 11 1.39 0.00
 8 2 12 -4.74 0.00
 8 2 13 1.73 0.00
 8 2 14 -1.15 0.00
 8 2 15 0.82 0.00
 8 2 16 -3.46 0.00
 8 2 17 -1.34 0.00
 8 2 18 -2.62 0.00
 8 4 0 26.51 0.00
 8 4 1 15.30 0.00
 8 4 2 3.30 0.00
 8 4 3 7.78 0.00
 8 4 4 7.63 0.00
 8 4 5 25.10 0.00
 8 4 6 2.54 0.00
 8 4 7 -1.72 0.00
 8 4 8 -8.88 0.00
 8 4 9 1.64 0.00
 8 4 10 -3.90 0.00
 8 4 11 -3.81 0.00
 8 4 12 -13.25 0.00
 8 4 13 -1.89 0.00
 8 4 14 -0.52 0.00
 8 4 15 -1.25 0.00
 8 4 16 -1.97 0.00
 8 4 17 -4.76 0.00
 8 4 18 6.04 0.00
 8 4 19 2.16 0.00
 8 6 0 5.73 0.00
 8 6 1 -19.12 0.00
 8 6 2 8.83 0.00
 8 6 3 -2.43 0.00
 8 6 4 -9.26 0.00
 8 6 5 1.97 0.00
 8 6 6 10.03 0.00
 8 6 7 -7.41 0.00
 8 6 8 -11.25 0.00
 8 6 9 7.80 0.00
 8 6 10 -1.27 0.00
 8 6 11 0.29 0.00
 8 6 12 -5.75 0.00
 8 6 13 0.85 0.00
 8 6 14 0.68 0.00
 8 6 15 3.22 0.00
 8 6 16 2.55 0.00
 8 6 17 -2.67 0.00
 8 6 18 6.57 0.00
 8 6 19 2.43 0.00
 8 8 0 -67.72 0.00
 8 8 1 -9.63 0.00
 8 8 2 -4.49 0.00
 8 8 3 -31.54 0.00
 8 8 4 -2.56 0.00
 8 8 5 -4.61 0.00
 8 8 6 10.43 0.00
 8 8 7 1.77 0.00
 8 8 8 -9.78 0.00
 8 8 9 9.78 0.00
 8 8 10 2.28 0.00
 8 8 11 3.01 0.00
 8 8 12 3.75 0.00
 8 8 13 -2.04 0.00
 8 8 14 3.80 0.00
 8 8 15 4.68 0.00
 8 8 16 -2.23 0.00
 8 8 17 -8.40 0.00
 8 8 18 5.22 0.00
 8 8 19 2.18 0.00
 8 10 0 -28.45 0.00
 8 10 1 -18.00 0.00
 8 10 2 0.94 0.00
 8 10 3 -9.00 0.00
 8 10 4 -3.24 0.00
 8 10 5 -0.51 0.00
 8 10 6 16.55 0.00
 8 10 7 10.04 0.00
 8 10 8 -2.12 0.00
 8 10 9 4.78 0.00
 8 10 10 3.06 0.00
 8 10 11 4.46 0.00
 8 10 12 -1.81 0.00
 8 10 13 -1.73 0.00
 8 10 14 7.08 0.00
 8 10 15 0.13 0.00
 8 10 16 -3.17 0.00
 8 10 17 -6.88 0.00
 8 10 18 1.29 0.00
 8 10 19 1.77 0.00
 8 12 0 -22.36 0.00
 8 12 1 16.35 0.00
 8 12 2 13.73 0.00
 8 12 3 -4.67 0.00
 8 12 4 -0.23 0.00
 8 12 5 9.33 0.00
 8 12 6 11.74 0.00
 8 12 7 -6.55 0.00
 8 12 8 -6.43 0.00
 8 12 9 -0.59 0.00
 8 12 10 -2.10 0.00
 8 12 11 0.72 0.00
 8 12 12 3.00 0.00
 8 12 13 -3.81 0.00
 8 12 14 0.47 0.00
 8 12 15 1.95 0.00
 8 12 16 -5.27 0.00
 8 12 17 -7.56 0.00
 8 12 18 3.16 0.00
 8 14 0 -12.69 0.00
 8 14 1 7.02 0.00
 8 14 2 -0.74 0.00
 8 14 3 7.83 0.00
 8 14 4 0.32 0.00
 8 14 5 -3.35 0.00
 8 14 6 -6.18 0.00
 8 14 7 -14.28 0.00
 8 14 8 -1.67 0.00
 8 14 9 1.78 0.00
 8 14 10 -4.19 0.00
 8 14 11 0.39 0.00
 8 14 12 -0.32 0.00
 8 14 13 -3.78 0.00
 8 14 14 -3.82 0.00
 8 14 15 4.81 0.00
 8 14 16 1.16 0.00
 8 14 17 -2.20 0.00
 8 14 18 1.98 0.00
 8 16 0 -5.09 0.00
 8 16 1 3.77 0.00
 8 16 2 -6.02 0.00
 8 16 3 -10.00 0.00
 8 16 4 -7.28 0.00
 8 16 5 3.29 0.00
 8 16 6 -6.36 0.00
 8 16 7 -5.87 0.00
 8 16 8 -1.47 0.00
 8 16 9 6.73 0.00
 8 16 10 -4.52 0.00
 8 16 11 -1.18 0.00
 8 16 12 9.18 0.00
 8 16 13 1.83 0.00
 8 16 14 -2.81 0.00
 8 16 15 2.00 0.00
 8 16 16 0.59 0.00
 8 16 17 -2.10 0.00
 8 16 18 -1.75 0.00
 8 18 0 1.07 0.00
 8 18 1 2.36 0.00
 8 18 2 -0.56 0.00
 8 18 3 3.78 0.00
 8 18 4 3.56 0.00
 8 18 5 -5.32 0.00
 8 18 6 -8.21 0.00
 8 18 7 -7.98 0.00
 8 18 8 3.19 0.00
 8 18 9 2.89 0.00
 8 18 10 -4.98 0.00
 8 18 11 -7.50 0.00
 8 18 12 4.90 0.00
 8 18 13 -5.32 0.00
 8 18 14 -1.02 0.00
 8 18 15 -2.33 0.00
 8 18 16 -0.78 0.00
 8 18 17 0.99 0.00
 8 18 18 -2.74 0.00
 8 20 0 10.28 0.00
 8 20 1 0.41 0.00
 8 20 2 5.70 0.00
 8 20 3 3.43 0.00
 8 20 4 0.62 0.00
 8 20 5 1.43 0.00
 8 20 6 -1.36 0.00
 8 20 7 -7.54 0.00
 8 20 8 3.96 0.00
 8 20 9 -6.43 0.00
 8 20 10 -1.16 0.00
 8 20 11 -4.51 0.00
 8 20 12 2.65 0.00
 8 20 13 1.58 0.00
 8 20 14 2.69 0.00
 8 20 15 -3.13 0.00
 8 20 16 -2.42 0.00
 8 20 17 9.34 0.00
 8 22 0 4.57 0.00
 8 22 1 1.47 0.00
 8 22 2 -0.03 0.00
 8 22 3 4.04 0.00
 8 22 4 4.98 0.00
 8 22 5 -3.39 0.00
 8 22 6 -0.80 0.00
 8 22 7 2.52 0.00
 8 22 8 -0.06 0.00
 8 22 9 3.30 0.00
 8 22 10 -2.31 0.00
 8 22 11 -1.15 0.00
 8 22 13 4.13 0.00
 8 22 14 1.59 0.00
 8 22 15 -2.23 0.00
 8 22 16 1.31 0.00
 8 22 17 -1.83 0.00
 8 24 0 -1.07 0.00
 8 24 1 -2.97 0.00
 8 24 2 -0.22 0.00
 8 24 3 4.52 0.00
 8 24 4 -1.30 0.00
 8 24 5 0.99 0.00
 8 24 6 -1.31 0.00
 8 24 7 5.33 0.00
 8 24 8 -2.32 0.00
 8 24 9 0.99 0.00
 8 24 10 -0.47 0.00
 8 24 11 3.27 0.00
 8 24 12 -3.66 0.00
 8 24 13 1.97 0.00
 8 24 14 4.45 0.00
 8 24 15 -2.93 0.00
 8 24 16 4.96 0.00
 8 26 0 1.92 0.00
 8 26 1 1.65 0.00
 8 26 2 -4.76 0.00
 8 26 3 2.64 0.00
 8 26 4 1.56 0.00
 8 26 5 0.61 0.00
 8 26 6 2.94 0.00
 8 26 7 3.58 0.00
 8 26 8 -2.80 0.00
 8 26 9 -5.61 0.00
 8 26 10 1.69 0.00
 8 26 11 -0.85 0.00
 8 26 13 -2.91 0.00
 8 26 14 4.25 0.00
 8 26 15 -2.75 0.00
 8 26 16 2.13 0.00
 8 28 0 -3.74 0.00
 8 28 1 0.50 0.00
 8 28 2 -3.94 0.00
 8 28 3 -2.03 0.00
 8 28 4 -0.31 0.00
 8 28 5 -5.15 0.00
 8 28 6 4.71 0.00
 8 28 7 0.83 0.00
 8 28 8 0.46 0.00
 8 28 9 -1.07 0.00
 8 28 10 7.50 0.00
 8 28 11 2.43 0.00
 8 28 13 -8.60 0.00
 8 28 14 3.61 0.00
 8 28 15 -0.42 0.00
 8 30 0 8.21 0.00
 8 30 1 1.15 0.00
 8 30 2 0.50 0.00
 8 30 3 -2.89 0.00
 8 30 4 -0.04 0.00
 8 30 5 -2.76 0.00
 8 30 6 1.86 0.00
 8 30 7 -0.02 0.00
 8 30 8 -1.96 0.00
 8 30 9 -0.33 0.00
 8 30 10 -0.11 0.00
 8 30 11 13.14 0.00
 8 30 12 -3.93 0.00
 8 30 13 -5.94 0.00
 8 30 14 3.51 0.00
 8 30 15 1.44 0.00
 8 32 0 3.87 0.00
 8 32 1 0.89 0.00
 8 32 2 2.68 0.00
 8 32 3 1.70 0.00
 8 32 4 -3.98 0.00
 8 32 5 -0.45 0.00
 8 32 6 -0.17 0.00
 8 32 7 4.75 0.00
 8 32 8 -2.40 0.00
 8 32 9 -0.59 0.00
 8 32 10 -1.36 0.00
 8 32 11 1.50 0.00
 8 32 12 -1.76 0.00
 8 32 13 -3.35 0.00
 8 32 14 1.88 0.00
 8 34 0 0.43 0.00
 8 34 1 1.39 0.00
 8 34 2 -1.18 0.00
 8 34 3 0.14 0.00
 8 34 4 -2.61 0.00
 8 34 5 2.87 0.00
 8 34 6 -2.38 0.00
 8 34 7 1.82 0.00
 8 34 8 2.98 0.00
 8 34 9 -5.32 0.00
 8 34 10 2.78 0.00
 8 34 11 0.63 0.00
 8 34 12 -3.72 0.00
 8 34 13 -3.41 0.00
 8 36 0 4.19 0.00
 8 36 1 -1.16 0.00
 8 36 2 2.37 0.00
 8 36 3 1.65 0.00
 8 36 4 -0.36 0.00
 8 36 5 0.19 0.00
 8 36 6 -2.44 0.00
 8 36 7 0.23 0.00
 8 36 8 2.74 0.00
 8 36 9 -1.49 0.00
 8 36 10 -0.42 0.00
 8 36 11 -1.41 0.00
 8 36 12 2.10 0.00
 8 38 0 6.84 0.00
 8 38 1 -3.09 0.00
 8 38 2 2.78 0.00
 8 38 3 2.62 0.00
 8 38 4 1.03 0.00
 8 38 5 3.00 0.00
 8 38 6 0.62 0.00
 8 38 7 -1.85 0.00
 8 38 8 4.76 0.00
 8 38 9 -0.04 0.00
 8 38 10 4.04 0.00
 8 40 0 -1.27 0.00
 8 40 1 0.21 0.00
 8 40 2 1.82 0.00
 8 40 3 -2.81 0.00
 8 40 4 0.01 0.00
 8 40 5 2.91 0.00
 8 40 6 0.26 0.00
 8 40 7 3.22 0.00
 8 40 8 -1.75 0.00
 8 40 9 -2.39 0.00
 8 42 0 0.55 0.00
 8 42 1 -1.66 0.00
 8 42 2 0.00 0.00
 8 42 3 -1.82 0.00
 8 42 4 -2.37 0.00
 8 42 5 2.64 0.00
 8 42 6 -1.33 0.00
 8 42 7 2.35 0.00
 8 42 8 -1.59 0.00
 8 44 0 -1.40 0.00
 8 44 1 -0.65 0.00
 8 44 2 2.81 0.00
 8 44 3 -0.76 0.00
 8 44 4 -1.55 0.00
 8 44 5 0.70 0.00
 8 44 6 2.07 0.00
 8 46 0 3.74 0.00
 8 46 1 0.33 0.00
 8 46 2 2.94 0.00
 8 46 3 0.67 0.00
 9 1 0 9.40 0.00
 9 1 1 41.56 0.00
 9 1 2 -11.00 0.00
 9 1 3 -54.11 0.00
 9 1 4 -11.62 0.00
 9 1 5 -19.50 0.00
 9 1 6 13.87 0.00
 9 1 7 21.81 0.00
 9 1 8 1.85 0.00
 9 1 9 -3.96 0.00
 9 1 10 3.51 0.00
 9 1 11 -8.79 0.00
 9 1 12 -1.75 0.00
 9 1 13 -0.24 0.00
 9 1 14 -5.01 0.00
 9 1 15 -0.24 0.00
 9 1 16 1.28 0.00
 9 1 17 5.95 0.00
 9 1 18 -12.52 0.00
 9 3 0 21.35 0.00
 9 3 1 30.23 0.00
 9 3 2 7.03 0.00
 9 3 3 -31.23 0.00
 9 3 4 14.91 0.00
 9 3 5 -9.46 0.00
 9 3 6 11.51 0.00
 9 3 7 7.45 0.00
 9 3 8 -9.81 0.00
 9 3 9 -1.51 0.00
 9 3 10 0.51 0.00
 9 3 11 -12.40 0.00
 9 3 12 -0.72 0.00
 9 3 13 -1.35 0.00
 9 3 14 0.20 0.00
 9 3 15 1.72 0.00
 9 3 16 1.90 0.00
 9 3 17 -3.04 0.00
 9 3 18 -1.29 0.00
 9 5 0 6.87 0.00
 9 5 1 37.61 0.00
 9 5 2 -0.50 0.00
 9 5 3 -5.22 0.00
 9 5 4 -0.32 0.00
 9 5 5 -4.63 0.00
 9 5 6 -3.93 0.00
 9 5 7 -3.98 0.00
 9 5 8 -6.51 0.00
 9 5 9 -0.08 0.00
 9 5 10 5.11 0.00
 9 5 11 3.74 0.00
 9 5 12 -5.32 0.00
 9 5 13 -1.09 0.00
 9 5 14 4.55 0.00
 9 5 15 -8.64 0.00
 9 5 16 0.16 0.00
 9 5 17 -4.20 0.00
 9 5 18 -4.04 0.00
 9 5 19 2.88 0.00
 9 7 0 5.24 0.00
 9 7 1 23.34 0.00
 9 7 2 -3.22 0.00
 9 7 3 13.09 0.00
 9 7 4 -10.04 0.00
 9 7 5 -4.43 0.00
 9 7 6 -12.75 0.00
 9 7 7 -5.53 0.00
 9 7 8 -1.28 0.00
 9 7 9 0.82 0.00
 9 7 10 -1.01 0.00
 9 7 11 3.18 0.00
 9 7 12 5.85 0.00
 9 7 13 -5.26 0.00
 9 7 14 5.32 0.00
 9 7 15 -0.25 0.00
 9 7 16 0.66 0.00
 9 7 17 -2.92 0.00
 9 7 18 -0.46 0.00
 9 7 19 1.69 0.00
 9 9 0 -1.76 0.00
 9 9 1 -4.09 0.00
 9 9 2 -12.87 0.00
 9 9 3 11.14 0.00
 9 9 4 -7.66 0.00
 9 9 5 -1.23 0.00
 9 9 6 4.26 0.00
 9 9 7 -7.47 0.00
 9 9 8 5.44 0.00
 9 9 9 -2.79 0.00
 9 9 10 -1.78 0.00
 9 9 11 9.89 0.00
 9 9 12 -3.19 0.00
 9 9 13 -3.08 0.00
 9 9 14 5.27 0.00
 9 9 15 1.45 0.00
 9 9 16 -2.26 0.00
 9 9 17 2.32 0.00
 9 9 18 1.63 0.00
 9 11 0 -8.59 0.00
 9 11 1 -4.70 0.00
 9 11 2 -8.38 0.00
 9 11 3 11.78 0.00
 9 11 4 -7.09 0.00
 9 11 5 0.42 0.00
 9 11 6 3.05 0.00
 9 11 7 -2.26 0.00
 9 11 8 -0.55 0.00
 9 11 9 -3.68 0.00
 9 11 10 -2.01 0.00
 9 11 11 -1.33 0.00
 9 11 12 3.32 0.00
 9 11 13 -6.27 0.00
 9 11 14 3.12 0.00
 9 11 15 -0.04 0.00
 9 11 16 -4.18 0.00
 9 11 17 1.05 0.00
 9 11 18 1.27 0.00
 9 13 0 -0.42 0.00
 9 13 1 -16.18 0.00
 9 13 2 -13.69 0.00
 9 13 3 11.20 0.00
 9 13 4 12.78 0.00
 9 13 5 1.54 0.00
 9 13 6 2.46 0.00
 9 13 7 -8.69 0.00
 9 13 8 2.90 0.00
 9 13 9 -6.23 0.00
 9 13 10 3.31 0.00
 9 13 11 -1.48 0.00
 9 13 12 -5.36 0.00
 9 13 13 -1.17 0.00
 9 13 14 1.27 0.00
 9 13 15 2.38 0.00
 9 13 16 -1.21 0.00
 9 13 17 2.85 0.00
 9 13 18 4.21 0.00
 9 15 0 6.32 0.00
 9 15 1 -13.90 0.00
 9 15 2 -2.02 0.00
 9 15 3 4.98 0.00
 9 15 4 3.83 0.00
 9 15 5 2.69 0.00
 9 15 6 -0.70 0.00
 9 15 7 -2.44 0.00
 9 15 8 2.47 0.00
 9 15 9 2.49 0.00
 9 15 10 -4.78 0.00
 9 15 11 1.38 0.00
 9 15 12 -5.68 0.00
 9 15 13 1.71 0.00
 9 15 14 -1.09 0.00
 9 15 15 -1.88 0.00
 9 15 16 0.41 0.00
 9 15 17 2.18 0.00
 9 15 18 -2.45 0.00
 9 17 0 -0.68 0.00
 9 17 1 -15.67 0.00
 9 17 2 -11.07 0.00
 9 17 3 0.05 0.00
 9 17 4 14.34 0.00
 9 17 5 -3.99 0.00
 9 17 6 -5.43 0.00
 9 17 7 -1.00 0.00
 9 17 8 2.35 0.00
 9 17 9 1.46 0.00
 9 17 10 -2.09 0.00
 9 17 11 1.74 0.00
 9 17 12 -1.94 0.00
 9 17 13 5.78 0.00
 9 17 14 -0.60 0.00
 9 17 15 2.63 0.00
 9 17 16 -0.66 0.00
 9 17 17 -3.66 0.00
 9 19 0 -0.04 0.00
 9 19 1 -3.79 0.00
 9 19 2 -4.18 0.00
 9 19 3 3.14 0.00
 9 19 4 6.73 0.00
 9 19 5 -1.02 0.00
 9 19 6 2.88 0.00
 9 19 7 -4.02 0.00
 9 19 8 2.51 0.00
 9 19 9 4.70 0.00
 9 19 10 -2.32 0.00
 9 19 11 -1.56 0.00
 9 19 12 -0.73 0.00
 9 19 13 4.12 0.00
 9 19 14 -2.40 0.00
 9 19 15 -0.50 0.00
 9 19 16 1.27 0.00
 9 19 17 2.83 0.00
 9 21 0 -0.20 0.00
 9 21 1 -0.81 0.00
 9 21 2 0.91 0.00
 9 21 3 -0.09 0.00
 9 21 4 6.04 0.00
 9 21 5 -3.08 0.00
 9 21 6 -5.25 0.00
 9 21 7 -0.11 0.00
 9 21 8 -0.20 0.00
 9 21 9 -1.05 0.00
 9 21 10 3.66 0.00
 9 21 11 -1.60 0.00
 9 21 12 3.09 0.00
 9 21 13 4.67 0.00
 9 21 14 -1.67 0.00
 9 21 15 -0.73 0.00
 9 21 16 -3.38 0.00
 9 21 17 2.98 0.00
 9 23 0 -0.51 0.00
 9 23 1 7.09 0.00
 9 23 2 0.21 0.00
 9 23 3 4.84 0.00
 9 23 4 1.30 0.00
 9 23 5 -0.93 0.00
 9 23 6 -1.22 0.00
 9 23 7 0.12 0.00
 9 23 8 -1.75 0.00
 9 23 9 2.68 0.00
 9 23 10 0.43 0.00
 9 23 11 -4.11 0.00
 9 23 12 1.20 0.00
 9 23 13 -1.63 0.00
 9 23 14 -0.47 0.00
 9 23 15 -1.17 0.00
 9 23 16 1.15 0.00
 9 25 0 -0.53 0.00
 9 25 1 0.31 0.00
 9 25 2 3.38 0.00
 9 25 3 -1.73 0.00
 9 25 4 -3.45 0.00
 9 25 5 1.15 0.00
 9 25 6 0.70 0.00
 9 25 7 -0.23 0.00
 9 25 8 -4.39 0.00
 9 25 9 3.51 0.00
 9 25 10 -4.48 0.00
 9 25 11 0.66 0.00
 9 25 12 -4.49 0.00
 9 25 13 -0.77 0.00
 9 25 14 0.74 0.00
 9 25 15 2.46 0.00
 9 25 16 1.15 0.00
 9 27 0 0.34 0.00
 9 27 1 3.96 0.00
 9 27 2 5.27 0.00
 9 27 3 -1.05 0.00
 9 27 4 -2.07 0.00
 9 27 5 1.22 0.00
 9 27 6 2.98 0.00
 9 27 7 0.19 0.00
 9 27 8 -4.00 0.00
 9 27 9 0.83 0.00
 9 27 10 4.84 0.00
 9 27 12 1.49 0.00
 9 27 13 -1.38 0.00
 9 27 14 1.41 0.00
 9 27 15 5.32 0.00
 9 29 0 -1.29 0.00
 9 29 1 2.20 0.00
 9 29 2 2.76 0.00
 9 29 3 -3.73 0.00
 9 29 4 -2.65 0.00
 9 29 5 -0.57 0.00
 9 29 6 4.00 0.00
 9 29 7 0.14 0.00
 9 29 8 1.77 0.00
 9 29 9 -2.33 0.00
 9 29 10 10.34 0.00
 9 29 11 -0.42 0.00
 9 29 12 -3.45 0.00
 9 29 13 -3.53 0.00
 9 29 14 -5.26 0.00
 9 31 0 -1.17 0.00
 9 31 1 0.31 0.00
 9 31 2 4.12 0.00
 9 31 3 -0.83 0.00
 9 31 4 -2.21 0.00
 9 31 5 3.56 0.00
 9 31 6 6.40 0.00
 9 31 7 4.41 0.00
 9 31 8 0.88 0.00
 9 31 9 1.69 0.00
 9 31 10 8.16 0.00
 9 31 11 4.47 0.00
 9 31 12 5.01 0.00
 9 31 13 -1.27 0.00
 9 31 14 1.05 0.00
 9 33 0 -0.65 0.00
 9 33 1 -2.11 0.00
 9 33 2 3.85 0.00
 9 33 3 -1.61 0.00
 9 33 4 -2.80 0.00
 9 33 5 2.59 0.00
 9 33 6 -3.66 0.00
 9 33 7 5.97 0.00
 9 33 8 -0.12 0.00
 9 33 9 -0.99 0.00
 9 33 10 4.85 0.00
 9 33 11 6.07 0.00
 9 33 12 6.95 0.00
 9 33 13 -2.33 0.00
 9 35 0 -1.06 0.00
 9 35 1 0.73 0.00
 9 35 2 1.43 0.00
 9 35 3 -1.14 0.00
 9 35 4 -2.79 0.00
 9 35 5 1.36 0.00
 9 35 6 -1.31 0.00
 9 35 7 1.93 0.00
 9 35 8 -0.21 0.00
 9 35 9 2.93 0.00
 9 35 10 -4.99 0.00
 9 35 11 -4.37 0.00
 9 35 12 3.42 0.00
 9 37 0 -6.24 0.00
 9 37 1 0.36 0.00
 9 37 2 -1.47 0.00
 9 37 3 -2.07 0.00
 9 37 4 2.38 0.00
 9 37 5 -0.84 0.00
 9 37 6 -3.57 0.00
 9 37 7 -2.72 0.00
 9 37 8 2.55 0.00
 9 37 9 0.30 0.00
 9 37 10 -2.55 0.00
 9 37 11 7.24 0.00
 9 39 0 4.19 0.00
 9 39 1 -0.26 0.00
 9 39 2 2.66 0.00
 9 39 3 -4.39 0.00
 9 39 4 3.04 0.00
 9 39 5 -2.72 0.00
 9 39 6 -0.96 0.00
 9 39 7 1.12 0.00
 9 39 8 -3.39 0.00
 9 39 9 2.33 0.00
 9 41 0 -2.76 0.00
 9 41 1 -0.34 0.00
 9 41 2 -5.07 0.00
 9 41 3 0.19 0.00
 9 41 4 -1.51 0.00
 9 41 5 0.33 0.00
 9 41 6 0.31 0.00
 9 41 7 0.10 0.00
 9 41 8 1.49 0.00
 9 43 0 0.18 0.00
 9 43 1 2.54 0.00
 9 43 2 -4.62 0.00
 9 43 3 0.43 0.00
 9 43 4 2.65 0.00
 9 43 5 -1.84 0.00
 9 43 6 1.04 0.00
 9 45 0 -0.42 0.00
 9 45 1 -3.07 0.00
 9 45 2 0.72 0.00
 9 45 3 -0.58 0.00
 10 0 0 29.79 0.00
 10 0 1 -5.52 0.00
 10 0 2 -0.05 0.00
 10 0 3 6.61 0.00
 10 0 4 -11.37 0.00
 10 0 5 0.85 0.00
 10 0 6 -1.87 0.00
 10 0 7 6.70 0.00
 10 0 8 2.78 0.00
 10 0 9 -10.17 0.00
 10 0 10 -12.07 0.00
 10 0 11 -1.84 0.00
 10 0 12 -5.45 0.00
 10 0 13 3.53 0.00
 10 0 14 -8.28 0.00
 10 0 15 3.49 0.00
 10 0 16 0.65 0.00
 10 0 17 8.69 0.00
 10 2 0 -5.64 0.00
 10 2 1 -13.18 0.00
 10 2 2 -7.03 0.00
 10 2 3 -0.17 0.00
 10 2 4 -0.72 0.00
 10 2 5 3.21 0.00
 10 2 6 3.88 0.00
 10 2 7 4.22 0.00
 10 2 8 0.66 0.00
 10 2 9 -4.05 0.00
 10 2 10 -5.55 0.00
 10 2 11 -3.56 0.00
 10 2 12 0.34 0.00
 10 2 13 3.56 0.00
 10 2 14 -8.25 0.00
 10 2 15 2.93 0.00
 10 2 16 6.54 0.00
 10 2 17 2.15 0.00
 10 2 18 2.13 0.00
 10 4 0 -10.72 0.00
 10 4 1 -7.00 0.00
 10 4 2 -5.51 0.00
 10 4 3 -0.59 0.00
 10 4 4 -3.39 0.00
 10 4 5 4.93 0.00
 10 4 6 -6.90 0.00
 10 4 7 -3.84 0.00
 10 4 8 3.51 0.00
 10 4 9 8.72 0.00
 10 4 10 2.45 0.00
 10 4 11 1.78 0.00
 10 4 12 0.43 0.00
 10 4 13 5.76 0.00
 10 4 14 0.48 0.00
 10 4 15 -0.76 0.00
 10 4 16 -2.49 0.00
 10 4 17 -2.10 0.00
 10 4 18 0.35 0.00
 10 6 0 4.55 0.00
 10 6 1 -3.33 0.00
 10 6 2 13.60 0.00
 10 6 3 1.44 0.00
 10 6 4 -7.12 0.00
 10 6 5 -7.23 0.00
 10 6 6 -8.64 0.00
 10 6 7 -8.36 0.00
 10 6 8 7.34 0.00
 10 6 9 2.63 0.00
 10 6 10 3.78 0.00
 10 6 11 -7.77 0.00
 10 6 12 2.31 0.00
 10 6 13 3.06 0.00
 10 6 14 -5.67 0.00
 10 6 15 1.15 0.00
 10 6 16 0.09 0.00
 10 6 17 -2.70 0.00
 10 6 18 -4.42 0.00
 10 8 0 -2.66 0.00
 10 8 1 28.06 0.00
 10 8 2 14.16 0.00
 10 8 3 0.36 0.00
 10 8 4 -1.72 0.00
 10 8 5 -3.74 0.00
 10 8 6 -3.69 0.00
 10 8 7 -0.37 0.00
 10 8 8 2.85 0.00
 10 8 9 -7.14 0.00
 10 8 10 6.71 0.00
 10 8 11 -7.16 0.00
 10 8 12 2.23 0.00
 10 8 13 -1.51 0.00
 10 8 14 -1.72 0.00
 10 8 15 0.74 0.00
 10 8 16 -2.59 0.00
 10 8 17 -3.44 0.00
 10 8 18 2.06 0.00
 10 10 0 1.58 0.00
 10 10 1 -2.96 0.00
 10 10 2 2.83 0.00
 10 10 3 3.14 0.00
 10 10 4 -14.34 0.00
 10 10 5 2.91 0.00
 10 10 6 -10.52 0.00
 10 10 7 4.37 0.00
 10 10 8 1.66 0.00
 10 10 9 -5.59 0.00
 10 10 10 5.42 0.00
 10 10 11 -2.83 0.00
 10 10 12 -4.04 0.00
 10 10 13 1.74 0.00
 10 10 14 2.73 0.00
 10 10 15 -2.81 0.00
 10 10 16 3.47 0.00
 10 10 17 -3.37 0.00
 10 10 18 1.81 0.00
 10 12 0 4.55 0.00
 10 12 1 3.78 0.00
 10 12 2 -4.46 0.00
 10 12 3 -6.46 0.00
 10 12 4 -5.96 0.00
 10 12 5 5.28 0.00
 10 12 6 -2.89 0.00
 10 12 7 -2.44 0.00
 10 12 8 -2.72 0.00
 10 12 9 -4.66 0.00
 10 12 10 2.21 0.00
 10 12 11 -0.52 0.00
 10 12 12 -2.21 0.00
 10 12 13 -0.21 0.00
 10 12 14 3.19 0.00
 10 12 15 -1.81 0.00
 10 12 16 -0.39 0.00
 10 12 17 1.14 0.00
 10 12 18 -1.95 0.00
 10 14 0 0.32 0.00
 10 14 1 -3.21 0.00
 10 14 2 -1.88 0.00
 10 14 3 4.34 0.00
 10 14 4 9.04 0.00
 10 14 5 -0.27 0.00
 10 14 6 -4.04 0.00
 10 14 7 -1.40 0.00
 10 14 8 2.56 0.00
 10 14 9 2.97 0.00
 10 14 10 2.28 0.00
 10 14 11 -4.11 0.00
 10 14 12 -1.49 0.00
 10 14 13 -3.49 0.00
 10 14 14 0.29 0.00
 10 14 15 -0.95 0.00
 10 14 16 4.89 0.00
 10 14 17 3.07 0.00
 10 16 0 13.46 0.00
 10 16 1 -2.98 0.00
 10 16 2 -2.18 0.00
 10 16 3 -1.73 0.00
 10 16 4 10.33 0.00
 10 16 5 9.78 0.00
 10 16 6 -2.69 0.00
 10 16 7 2.26 0.00
 10 16 8 1.23 0.00
 10 16 9 1.35 0.00
 10 16 10 0.33 0.00
 10 16 11 -5.91 0.00
 10 16 12 -2.92 0.00
 10 16 13 0.33 0.00
 10 16 14 -0.46 0.00
 10 16 15 -2.46 0.00
 10 16 16 -0.32 0.00
 10 16 17 2.49 0.00
 10 18 0 -0.73 0.00
 10 18 1 -1.68 0.00
 10 18 2 -3.14 0.00
 10 18 3 4.25 0.00
 10 18 4 13.10 0.00
 10 18 5 1.13 0.00
 10 18 6 -2.30 0.00
 10 18 7 -1.76 0.00
 10 18 8 0.55 0.00
 10 18 9 3.98 0.00
 10 18 10 -1.26 0.00
 10 18 11 -0.82 0.00
 10 18 12 -1.90 0.00
 10 18 13 2.98 0.00
 10 18 14 -2.23 0.00
 10 18 15 -1.41 0.00
 10 18 16 2.19 0.00
 10 18 17 -2.20 0.00
 10 20 0 -5.63 0.00
 10 20 1 -1.93 0.00
 10 20 2 -4.80 0.00
 10 20 3 1.23 0.00
 10 20 4 5.49 0.00
 10 20 5 2.08 0.00
 10 20 6 -1.76 0.00
 10 20 7 -0.01 0.00
 10 20 8 0.71 0.00
 10 20 9 5.38 0.00
 10 20 10 2.78 0.00
 10 20 11 3.28 0.00
 10 20 12 -2.00 0.00
 10 20 13 4.67 0.00
 10 20 14 1.32 0.00
 10 20 15 -1.82 0.00
 10 20 16 0.87 0.00
 10 22 0 -10.31 0.00
 10 22 1 -4.10 0.00
 10 22 2 -8.69 0.00
 10 22 3 -2.11 0.00
 10 22 4 -2.43 0.00
 10 22 5 1.65 0.00
 10 22 6 -3.66 0.00
 10 22 7 3.29 0.00
 10 22 8 -0.26 0.00
 10 22 9 3.94 0.00
 10 22 10 1.63 0.00
 10 22 11 -4.53 0.00
 10 22 12 1.22 0.00
 10 22 13 -2.78 0.00
 10 22 14 -2.86 0.00
 10 22 15 -2.53 0.00
 10 22 16 0.71 0.00
 10 24 0 -0.72 0.00
 10 24 1 0.56 0.00
 10 24 2 4.45 0.00
 10 24 3 1.85 0.00
 10 24 4 -0.15 0.00
 10 24 5 -0.73 0.00
 10 24 6 -2.71 0.00
 10 24 7 0.88 0.00
 10 24 8 0.07 0.00
 10 24 9 0.81 0.00
 10 24 10 5.50 0.00
 10 24 11 -2.98 0.00
 10 24 12 1.03 0.00
 10 24 13 -2.86 0.00
 10 24 14 -0.20 0.00
 10 24 15 0.58 0.00
 10 26 0 2.03 0.00
 10 26 1 1.55 0.00
 10 26 2 4.02 0.00
 10 26 3 -2.10 0.00
 10 26 4 -2.32 0.00
 10 26 5 -0.46 0.00
 10 26 6 1.45 0.00
 10 26 7 -0.90 0.00
 10 26 8 0.75 0.00
 10 26 9 -1.17 0.00
 10 26 10 2.79 0.00
 10 26 11 0.11 0.00
 10 26 12 -1.63 0.00
 10 26 13 -0.30 0.00
 10 26 14 -2.50 0.00
 10 26 15 3.77 0.00
 10 28 0 -6.04 0.00
 10 28 1 2.55 0.00
 10 28 2 -1.55 0.00
 10 28 3 2.46 0.00
 10 28 4 -6.81 0.00
 10 28 5 1.89 0.00
 10 28 6 0.98 0.00
 10 28 7 7.01 0.00
 10 28 8 -1.13 0.00
 10 28 9 5.43 0.00
 10 28 10 4.80 0.00
 10 28 12 2.55 0.00
 10 28 13 -4.92 0.00
 10 28 14 -1.37 0.00
 10 30 0 0.16 0.00
 10 30 1 -1.06 0.00
 10 30 2 5.96 0.00
 10 30 3 0.12 0.00
 10 30 4 -2.68 0.00
 10 30 5 2.93 0.00
 10 30 6 1.30 0.00
 10 30 7 -0.89 0.00
 10 30 8 -0.98 0.00
 10 30 9 0.10 0.00
 10 30 10 2.86 0.00
 10 30 12 3.92 0.00
 10 30 13 -6.08 0.00
 10 32 0 -3.75 0.00
 10 32 1 -1.02 0.00
 10 32 2 2.08 0.00
 10 32 3 0.40 0.00
 10 32 4 -0.33 0.00
 10 32 5 -3.64 0.00
 10 32 6 7.93 0.00
 10 32 7 0.73 0.00
 10 32 8 -0.65 0.00
 10 32 9 -1.33 0.00
 10 32 10 -3.60 0.00
 10 32 11 0.91 0.00
 10 32 12 5.19 0.00
 10 32 13 2.29 0.00
 10 34 0 -3.81 0.00
 10 34 1 0.03 0.00
 10 34 2 2.25 0.00
 10 34 3 -2.57 0.00
 10 34 4 2.41 0.00
 10 34 5 -1.20 0.00
 10 34 6 1.88 0.00
 10 34 7 -0.19 0.00
 10 34 8 0.35 0.00
 10 34 9 -0.51 0.00
 10 34 10 -1.85 0.00
 10 34 11 2.27 0.00
 10 34 12 -6.95 0.00
 10 36 0 -1.71 0.00
 10 36 1 0.52 0.00
 10 36 2 -3.45 0.00
 10 36 3 1.61 0.00
 10 36 4 -0.30 0.00
 10 36 5 -3.51 0.00
 10 36 6 -2.12 0.00
 10 36 7 0.90 0.00
 10 36 8 -4.06 0.00
 10 36 9 2.69 0.00
 10 36 10 -4.59 0.00
 10 38 0 3.36 0.00
 10 38 1 -0.31 0.00
 10 38 2 -3.58 0.00
 10 38 3 1.19 0.00
 10 38 4 0.49 0.00
 10 38 5 -2.27 0.00
 10 38 6 0.25 0.00
 10 38 7 -3.26 0.00
 10 38 8 1.61 0.00
 10 38 9 3.85 0.00
 10 40 0 4.57 0.00
 10 40 1 3.42 0.00
 10 40 2 -0.60 0.00
 10 40 3 -1.62 0.00
 10 40 4 1.49 0.00
 10 40 5 -0.78 0.00
 10 40 6 0.31 0.00
 10 40 7 -1.56 0.00
 10 40 8 -4.05 0.00
 10 42 0 8.86 0.00
 10 42 1 0.04 0.00
 10 42 2 -0.06 0.00
 10 42 3 0.88 0.00
 10 42 4 2.22 0.00
 10 42 5 1.43 0.00
 10 42 6 -0.56 0.00
 10 44 0 -0.09 0.00
 10 44 1 0.70 0.00
 10 44 2 -5.18 0.00
 10 44 3 0.90 0.00
 10 44 4 -4.27 0.00
 11 1 0 -28.81 0.00
 11 1 1 -9.01 0.00
 11 1 2 -7.23 0.00
 11 1 3 30.62 0.00
 11 1 4 -11.66 0.00
 11 1 5 11.83 0.00
 11 1 6 0.28 0.00
 11 1 7 -2.89 0.00
 11 1 8 -11.07 0.00
 11 1 9 1.96 0.00
 11 1 10 -4.97 0.00
 11 1 11 12.52 0.00
 11 1 12 3.83 0.00
 11 1 13 -0.18 0.00
 11 1 14 2.06 0.00
 11 1 15 -5.66 0.00
 11 1 16 4.68 0.00
 11 1 17 3.32 0.00
 11 3 0 -22.24 0.00
 11 3 1 -29.04 0.00
 11 3 2 -0.71 0.00
 11 3 3 11.46 0.00
 11 3 4 7.36 0.00
 11 3 5 1.75 0.00
 11 3 6 -0.10 0.00
 11 3 7 -12.21 0.00
 11 3 8 -10.12 0.00
 11 3 9 2.68 0.00
 11 3 10 -2.35 0.00
 11 3 11 0.39 0.00
 11 3 12 5.30 0.00
 11 3 13 -2.27 0.00
 11 3 14 4.74 0.00
 11 3 15 -1.03 0.00
 11 3 16 3.51 0.00
 11 3 17 -1.89 0.00
 11 5 0 2.74 0.00
 11 5 1 -22.19 0.00
 11 5 2 7.04 0.00
 11 5 3 17.96 0.00
 11 5 4 4.82 0.00
 11 5 5 2.28 0.00
 11 5 6 -0.24 0.00
 11 5 7 -7.63 0.00
 11 5 8 3.52 0.00
 11 5 9 1.89 0.00
 11 5 10 0.24 0.00
 11 5 11 1.40 0.00
 11 5 12 -4.08 0.00
 11 5 13 1.36 0.00
 11 5 14 0.60 0.00
 11 5 15 3.42 0.00
 11 5 16 -4.33 0.00
 11 5 17 3.91 0.00
 11 5 18 -1.46 0.00
 11 7 0 -9.30 0.00
 11 7 1 -11.29 0.00
 11 7 2 7.51 0.00
 11 7 3 2.16 0.00
 11 7 4 -0.40 0.00
 11 7 5 -7.03 0.00
 11 7 6 -0.48 0.00
 11 7 7 -0.54 0.00
 11 7 8 5.04 0.00
 11 7 9 -0.13 0.00
 11 7 10 -4.63 0.00
 11 7 11 -0.52 0.00
 11 7 12 4.85 0.00
 11 7 13 -2.06 0.00
 11 7 14 -1.73 0.00
 11 7 15 6.78 0.00
 11 7 16 -3.54 0.00
 11 7 17 0.19 0.00
 11 7 18 -1.51 0.00
 11 9 0 1.10 0.00
 11 9 1 -8.82 0.00
 11 9 2 -4.38 0.00
 11 9 3 -0.78 0.00
 11 9 4 2.14 0.00
 11 9 5 -4.02 0.00
 11 9 6 5.82 0.00
 11 9 7 4.37 0.00
 11 9 8 0.70 0.00
 11 9 9 2.83 0.00
 11 9 10 0.48 0.00
 11 9 11 1.31 0.00
 11 9 12 -1.40 0.00
 11 9 13 -3.47 0.00
 11 9 14 -2.47 0.00
 11 9 15 3.19 0.00
 11 9 16 -2.67 0.00
 11 9 17 -4.87 0.00
 11 11 0 -4.74 0.00
 11 11 1 4.82 0.00
 11 11 2 9.07 0.00
 11 11 3 -9.25 0.00
 11 11 4 -6.41 0.00
 11 11 5 0.42 0.00
 11 11 6 -0.97 0.00
 11 11 7 7.04 0.00
 11 11 8 -1.74 0.00
 11 11 9 5.53 0.00
 11 11 10 6.50 0.00
 11 11 11 0.82 0.00
 11 11 12 8.22 0.00
 11 11 13 -1.61 0.00
 11 11 14 -1.03 0.00
 11 11 15 3.24 0.00
 11 11 16 -1.80 0.00
 11 11 17 -2.65 0.00
 11 13 0 9.13 0.00
 11 13 1 2.46 0.00
 11 13 2 -0.66 0.00
 11 13 3 -4.59 0.00
 11 13 4 4.24 0.00
 11 13 5 -3.23 0.00
 11 13 6 -7.72 0.00
 11 13 7 0.67 0.00
 11 13 8 -3.45 0.00
 11 13 9 0.90 0.00
 11 13 10 6.73 0.00
 11 13 11 -0.07 0.00
 11 13 12 -0.94 0.00
 11 13 13 -0.77 0.00
 11 13 14 -2.02 0.00
 11 13 15 4.45 0.00
 11 13 16 0.52 0.00
 11 13 17 -0.72 0.00
 11 15 0 6.38 0.00
 11 15 1 7.16 0.00
 11 15 2 8.14 0.00
 11 15 3 -5.93 0.00
 11 15 4 -4.93 0.00
 11 15 5 -0.83 0.00
 11 15 6 -3.07 0.00
 11 15 7 -2.55 0.00
 11 15 8 -1.64 0.00
 11 15 9 4.01 0.00
 11 15 10 0.25 0.00
 11 15 11 -0.41 0.00
 11 15 12 -0.01 0.00
 11 15 13 -0.56 0.00
 11 15 14 -1.49 0.00
 11 15 15 0.40 0.00
 11 15 16 -0.11 0.00
 11 15 17 -0.59 0.00
 11 17 0 4.44 0.00
 11 17 1 7.57 0.00
 11 17 2 0.35 0.00
 11 17 3 0.68 0.00
 11 17 4 5.16 0.00
 11 17 5 -1.67 0.00
 11 17 6 -6.33 0.00
 11 17 7 -3.35 0.00
 11 17 8 -0.87 0.00
 11 17 9 -1.58 0.00
 11 17 10 -0.34 0.00
 11 17 11 -0.86 0.00
 11 17 12 -1.25 0.00
 11 17 13 -2.83 0.00
 11 17 14 0.19 0.00
 11 17 15 -1.89 0.00
 11 17 16 -2.98 0.00
 11 19 0 3.65 0.00
 11 19 1 0.74 0.00
 11 19 2 1.09 0.00
 11 19 3 3.62 0.00
 11 19 4 -3.46 0.00
 11 19 5 6.28 0.00
 11 19 6 -1.44 0.00
 11 19 7 -2.01 0.00
 11 19 8 -1.30 0.00
 11 19 9 3.12 0.00
 11 19 10 -1.24 0.00
 11 19 11 -2.51 0.00
 11 19 12 -1.26 0.00
 11 19 13 -1.00 0.00
 11 19 14 -1.21 0.00
 11 19 15 -2.17 0.00
 11 19 16 0.96 0.00
 11 21 0 2.87 0.00
 11 21 1 -1.92 0.00
 11 21 2 1.13 0.00
 11 21 3 1.96 0.00
 11 21 4 -4.91 0.00
 11 21 5 5.41 0.00
 11 21 6 -0.86 0.00
 11 21 7 1.37 0.00
 11 21 8 1.67 0.00
 11 21 9 0.16 0.00
 11 21 10 -1.26 0.00
 11 21 11 2.25 0.00
 11 21 12 -1.45 0.00
 11 21 13 3.90 0.00
 11 21 14 0.35 0.00
 11 21 15 3.06 0.00
 11 21 16 -2.05 0.00
 11 23 0 -0.21 0.00
 11 23 1 -3.47 0.00
 11 23 2 -1.06 0.00
 11 23 3 1.73 0.00
 11 23 4 0.14 0.00
 11 23 5 2.55 0.00
 11 23 6 2.04 0.00
 11 23 7 0.67 0.00
 11 23 8 4.49 0.00
 11 23 9 1.78 0.00
 11 23 10 0.46 0.00
 11 23 11 -0.59 0.00
 11 23 12 -1.63 0.00
 11 23 13 -0.83 0.00
 11 23 14 -1.08 0.00
 11 23 15 1.09 0.00
 11 25 0 3.32 0.00
 11 25 1 -9.62 0.00
 11 25 2 0.61 0.00
 11 25 3 -4.38 0.00
 11 25 4 -0.68 0.00
 11 25 5 -0.87 0.00
 11 25 6 7.58 0.00
 11 25 7 -1.59 0.00
 11 25 8 5.69 0.00
 11 25 9 2.05 0.00
 11 25 10 -1.44 0.00
 11 25 11 1.99 0.00
 11 25 12 -5.08 0.00
 11 25 13 0.33 0.00
 11 25 14 -3.95 0.00
 11 27 0 1.31 0.00
 11 27 1 -6.27 0.00
 11 27 2 -0.52 0.00
 11 27 3 -3.16 0.00
 11 27 4 -1.87 0.00
 11 27 5 -0.67 0.00
 11 27 6 2.10 0.00
 11 27 7 1.61 0.00
 11 27 8 3.26 0.00
 11 27 9 1.55 0.00
 11 27 10 -0.15 0.00
 11 27 11 4.34 0.00
 11 27 12 -0.57 0.00
 11 27 13 1.06 0.00
 11 27 14 0.05 0.00
 11 29 0 2.80 0.00
 11 29 1 -1.51 0.00
 11 29 2 0.34 0.00
 11 29 3 -0.48 0.00
 11 29 4 0.86 0.00
 11 29 5 -1.94 0.00
 11 29 6 -1.36 0.00
 11 29 7 2.13 0.00
 11 29 8 -1.08 0.00
 11 29 9 -2.09 0.00
 11 29 10 1.42 0.00
 11 29 11 0.55 0.00
 11 29 12 -7.94 0.00
 11 29 13 -1.64 0.00
 11 31 0 0.75 0.00
 11 31 1 1.18 0.00
 11 31 2 -1.13 0.00
 11 31 3 1.11 0.00
 11 31 4 -0.79 0.00
 11 31 5 -1.68 0.00
 11 31 6 2.04 0.00
 11 31 7 0.01 0.00
 11 31 8 -1.87 0.00
 11 31 9 -2.74 0.00
 11 31 10 -3.24 0.00
 11 31 11 -3.07 0.00
 11 31 12 2.73 0.00
 11 33 0 -1.52 0.00
 11 33 1 -0.25 0.00
 11 33 2 -2.82 0.00
 11 33 3 -0.99 0.00
 11 33 4 0.69 0.00
 11 33 5 -4.00 0.00
 11 33 6 -0.04 0.00
 11 33 7 -1.77 0.00
 11 33 8 0.31 0.00
 11 33 9 -5.08 0.00
 11 33 10 -4.92 0.00
 11 33 11 1.19 0.00
 11 35 0 1.59 0.00
 11 35 1 0.88 0.00
 11 35 2 0.64 0.00
 11 35 3 -0.33 0.00
 11 35 4 1.42 0.00
 11 35 5 -2.38 0.00
 11 35 6 2.09 0.00
 11 35 7 -2.92 0.00
 11 35 8 -0.77 0.00
 11 35 9 2.60 0.00
 11 35 10 -11.24 0.00
 11 37 0 -0.21 0.00
 11 37 1 1.13 0.00
 11 37 2 1.13 0.00
 11 37 3 1.66 0.00
 11 37 4 0.00 0.00
 11 37 5 3.08 0.00
 11 37 6 -1.86 0.00
 11 37 7 -3.62 0.00
 11 37 8 1.46 0.00
 11 39 0 2.41 0.00
 11 39 1 0.27 0.00
 11 39 2 2.03 0.00
 11 39 3 -0.21 0.00
 11 39 4 -1.65 0.00
 11 39 5 2.09 0.00
 11 39 6 1.45 0.00
 11 39 7 -0.86 0.00
 11 41 0 1.18 0.00
 11 41 1 3.61 0.00
 11 41 2 2.17 0.00
 11 41 3 0.66 0.00
 11 41 4 -3.04 0.00
 11 41 5 -0.17 0.00
 11 41 6 1.89 0.00
 11 43 0 2.76 0.00
 11 43 1 1.81 0.00
 11 43 2 1.28 0.00
 11 43 3 -1.24 0.00
 12 0 0 21.64 0.00
 12 0 1 -4.98 0.00
 12 0 2 0.94 0.00
 12 0 3 6.47 0.00
 12 0 4 5.23 0.00
 12 0 5 -7.24 0.00
 12 0 6 9.22 0.00
 12 0 7 8.21 0.00
 12 0 10 -1.73 0.00
 12 0 11 -0.06 0.00
 12 0 12 -5.29 0.00
 12 0 13 -2.79 0.00
 12 0 14 -3.33 0.00
 12 0 15 -1.57 0.00
 12 2 0 -8.40 0.00
 12 2 1 -3.85 0.00
 12 2 2 -4.88 0.00
 12 2 3 -2.17 0.00
 12 2 4 11.37 0.00
 12 2 5 -1.55 0.00
 12 2 6 2.95 0.00
 12 2 7 4.17 0.00
 12 2 8 -5.47 0.00
 12 2 10 -3.77 0.00
 12 2 11 4.44 0.00
 12 2 12 -2.67 0.00
 12 2 13 -0.68 0.00
 12 2 14 1.50 0.00
 12 2 15 -4.26 0.00
 12 2 16 8.68 0.00
 12 4 0 -2.60 0.00
 12 4 1 0.75 0.00
 12 4 2 -8.24 0.00
 12 4 3 6.75 0.00
 12 4 4 4.54 0.00
 12 4 5 -2.43 0.00
 12 4 6 -6.50 0.00
 12 4 7 3.17 0.00
 12 4 8 -6.08 0.00
 12 4 9 -1.60 0.00
 12 4 10 2.13 0.00
 12 4 11 10.80 0.00
 12 4 12 -0.09 0.00
 12 4 13 2.55 0.00
 12 4 14 6.65 0.00
 12 4 15 -2.40 0.00
 12 4 16 0.12 0.00
 12 4 17 1.05 0.00
 12 6 0 -9.80 0.00
 12 6 1 -1.76 0.00
 12 6 2 11.67 0.00
 12 6 3 2.21 0.00
 12 6 4 5.93 0.00
 12 6 5 -5.20 0.00
 12 6 6 -7.56 0.00
 12 6 7 0.62 0.00
 12 6 8 -0.05 0.00
 12 6 9 -2.31 0.00
 12 6 10 -2.27 0.00
 12 6 11 9.52 0.00
 12 6 12 2.64 0.00
 12 6 13 2.34 0.00
 12 6 14 -1.61 0.00
 12 6 15 1.72 0.00
 12 6 16 0.25 0.00
 12 6 17 -3.48 0.00
 12 8 0 -1.05 0.00
 12 8 1 0.60 0.00
 12 8 2 3.22 0.00
 12 8 3 0.85 0.00
 12 8 4 5.33 0.00
 12 8 5 -3.11 0.00
 12 8 6 1.29 0.00
 12 8 7 1.71 0.00
 12 8 8 -2.77 0.00
 12 8 9 -5.17 0.00
 12 8 10 1.96 0.00
 12 8 11 12.27 0.00
 12 8 12 4.06 0.00
 12 8 13 -2.29 0.00
 12 8 14 2.33 0.00
 12 8 15 2.90 0.00
 12 8 16 0.31 0.00
 12 8 17 -1.83 0.00
 12 10 0 -17.19 0.00
 12 10 1 -8.24 0.00
 12 10 2 5.04 0.00
 12 10 3 1.72 0.00
 12 10 4 2.41 0.00
 12 10 5 1.20 0.00
 12 10 6 0.06 0.00
 12 10 7 1.34 0.00
 12 10 8 2.75 0.00
 12 10 9 1.79 0.00
 12 10 10 3.08 0.00
 12 10 11 7.50 0.00
 12 10 12 -1.08 0.00
 12 10 13 -2.89 0.00
 12 10 14 -2.25 0.00
 12 10 15 3.02 0.00
 12 10 16 2.98 0.00
 12 10 17 -1.20 0.00
 12 12 0 6.45 0.00
 12 12 1 -3.82 0.00
 12 12 2 1.34 0.00
 12 12 3 -2.34 0.00
 12 12 4 5.27 0.00
 12 12 5 -4.64 0.00
 12 12 6 2.67 0.00
 12 12 7 -5.12 0.00
 12 12 8 0.51 0.00
 12 12 9 2.45 0.00
 12 12 10 -3.18 0.00
 12 12 11 8.64 0.00
 12 12 12 -1.58 0.00
 12 12 13 -1.91 0.00
 12 12 14 0.15 0.00
 12 12 15 2.89 0.00
 12 12 16 -1.74 0.00
 12 12 17 0.64 0.00
 12 14 0 -7.81 0.00
 12 14 1 2.33 0.00
 12 14 2 -0.16 0.00
 12 14 3 0.60 0.00
 12 14 4 0.69 0.00
 12 14 5 -6.03 0.00
 12 14 6 -3.09 0.00
 12 14 7 0.11 0.00
 12 14 8 0.04 0.00
 12 14 9 5.49 0.00
 12 14 10 -1.66 0.00
 12 14 11 1.90 0.00
 12 14 12 5.21 0.00
 12 14 13 -0.53 0.00
 12 14 14 -4.23 0.00
 12 14 15 -0.38 0.00
 12 14 16 -0.53 0.00
 12 14 17 -8.48 0.00
 12 16 0 3.97 0.00
 12 16 1 -3.48 0.00
 12 16 2 -7.46 0.00
 12 16 3 -0.31 0.00
 12 16 4 -3.71 0.00
 12 16 5 0.70 0.00
 12 16 6 -7.34 0.00
 12 16 7 -2.09 0.00
 12 16 8 4.71 0.00
 12 16 9 1.50 0.00
 12 16 10 0.67 0.00
 12 16 11 -1.15 0.00
 12 16 12 3.73 0.00
 12 16 13 2.19 0.00
 12 16 14 1.46 0.00
 12 16 15 -0.87 0.00
 12 16 16 -2.50 0.00
 12 18 0 -0.36 0.00
 12 18 1 0.08 0.00
 12 18 2 -5.05 0.00
 12 18 3 -1.36 0.00
 12 18 4 -3.06 0.00
 12 18 5 -2.84 0.00
 12 18 6 -1.04 0.00
 12 18 7 -6.31 0.00
 12 18 8 1.46 0.00
 12 18 9 -1.19 0.00
 12 18 10 -3.00 0.00
 12 18 11 -3.05 0.00
 12 18 12 4.78 0.00
 12 18 13 3.04 0.00
 12 18 14 -2.05 0.00
 12 18 15 -2.37 0.00
 12 18 16 2.44 0.00
 12 20 0 3.40 0.00
 12 20 1 6.06 0.00
 12 20 2 1.91 0.00
 12 20 3 -0.80 0.00
 12 20 4 3.58 0.00
 12 20 5 -3.22 0.00
 12 20 6 -0.81 0.00
 12 20 7 -2.62 0.00
 12 20 8 -0.76 0.00
 12 20 9 1.19 0.00
 12 20 10 -1.75 0.00
 12 20 11 -5.34 0.00
 12 20 12 1.96 0.00
 12 20 13 1.59 0.00
 12 20 14 3.10 0.00
 12 20 15 -2.14 0.00
 12 22 0 4.38 0.00
 12 22 1 1.55 0.00
 12 22 2 0.61 0.00
 12 22 3 -3.14 0.00
 12 22 4 -1.97 0.00
 12 22 5 2.96 0.00
 12 22 6 3.06 0.00
 12 22 7 0.01 0.00
 12 22 8 -1.23 0.00
 12 22 9 1.20 0.00
 12 22 10 -3.59 0.00
 12 22 11 -5.69 0.00
 12 22 12 2.13 0.00
 12 22 13 0.15 0.00
 12 22 14 -0.07 0.00
 12 22 15 -3.96 0.00
 12 24 0 -0.11 0.00
 12 24 1 5.75 0.00
 12 24 2 -0.52 0.00
 12 24 3 -1.47 0.00
 12 24 4 4.84 0.00
 12 24 5 -0.25 0.00
 12 24 6 2.57 0.00
 12 24 7 0.56 0.00
 12 24 8 -1.88 0.00
 12 24 9 2.48 0.00
 12 24 10 -1.12 0.00
 12 24 11 -1.13 0.00
 12 24 12 -0.84 0.00
 12 24 13 4.14 0.00
 12 24 14 -1.54 0.00
 12 26 0 -9.45 0.00
 12 26 1 2.98 0.00
 12 26 2 -6.02 0.00
 12 26 3 -3.68 0.00
 12 26 4 1.47 0.00
 12 26 5 -1.58 0.00
 12 26 6 6.61 0.00
 12 26 7 -2.13 0.00
 12 26 8 0.01 0.00
 12 26 9 -1.32 0.00
 12 26 10 -0.90 0.00
 12 26 11 -4.03 0.00
 12 26 12 -2.98 0.00
 12 26 13 2.00 0.00
 12 28 0 -6.22 0.00
 12 28 1 2.70 0.00
 12 28 2 -6.87 0.00
 12 28 3 -0.77 0.00
 12 28 4 0.66 0.00
 12 28 5 -1.32 0.00
 12 28 6 3.68 0.00
 12 28 7 3.32 0.00
 12 28 8 -2.06 0.00
 12 28 9 -1.93 0.00
 12 28 10 -1.04 0.00
 12 28 11 -2.39 0.00
 12 28 12 -0.07 0.00
 12 28 13 -2.56 0.00
 12 30 0 0.64 0.00
 12 30 1 0.62 0.00
 12 30 2 5.33 0.00
 12 30 3 -1.02 0.00
 12 30 4 1.01 0.00
 12 30 5 -0.26 0.00
 12 30 6 -0.38 0.00
 12 30 7 -0.83 0.00
 12 30 8 -1.10 0.00
 12 30 9 -2.32 0.00
 12 30 10 -0.94 0.00
 12 30 11 2.00 0.00
 12 30 12 -11.23 0.00
 12 32 0 0.34 0.00
 12 32 1 4.26 0.00
 12 32 2 -2.30 0.00
 12 32 3 0.83 0.00
 12 32 4 -3.47 0.00
 12 32 5 -0.88 0.00
 12 32 6 1.85 0.00
 12 32 7 5.08 0.00
 12 32 8 -0.45 0.00
 12 32 9 -0.13 0.00
 12 32 10 -8.66 0.00
 12 32 11 3.90 0.00
 12 34 0 -2.07 0.00
 12 34 1 -0.94 0.00
 12 34 2 0.37 0.00
 12 34 3 -2.45 0.00
 12 34 4 -2.75 0.00
 12 34 5 2.65 0.00
 12 34 6 -3.86 0.00
 12 34 7 2.45 0.00
 12 34 8 2.81 0.00
 12 36 0 2.32 0.00
 12 36 1 -0.53 0.00
 12 36 2 1.03 0.00
 12 36 3 5.19 0.00
 12 36 4 -0.34 0.00
 12 36 5 2.52 0.00
 12 36 6 -2.11 0.00
 12 36 7 0.10 0.00
 12 36 8 1.42 0.00
 12 38 0 -1.59 0.00
 12 38 1 -2.07 0.00
 12 38 2 -2.07 0.00
 12 38 3 1.62 0.00
 12 38 4 -1.62 0.00
 12 38 5 0.27 0.00
 12 38 6 0.34 0.00
 12 38 7 -0.91 0.00
 12 40 0 -5.37 0.00
 12 40 1 0.88 0.00
 12 40 2 -1.33 0.00
 12 40 3 0.07 0.00
 12 40 4 -4.18 0.00
 12 40 5 2.13 0.00
 12 42 0 -1.07 0.00
 12 42 1 -4.12 0.00
 12 42 2 0.80 0.00
 12 42 3 -1.41 0.00
 13 1 0 11.50 0.00
 13 1 1 16.17 0.00
 13 1 2 13.03 0.00
 13 1 3 -15.60 0.00
 13 1 4 0.46 0.00
 13 1 5 -2.94 0.00
 13 1 6 8.03 0.00
 13 1 7 5.13 0.00
 13 1 12 0.89 0.00
 13 1 13 -5.55 0.00
 13 1 14 -0.42 0.00
 13 1 15 -0.45 0.00
 13 1 17 4.47 0.00
 13 3 0 -5.59 0.00
 13 3 1 5.62 0.00
 13 3 2 -3.07 0.00
 13 3 3 -17.40 0.00
 13 3 4 -0.66 0.00
 13 3 5 -3.86 0.00
 13 3 6 1.35 0.00
 13 3 7 5.46 0.00
 13 3 8 1.25 0.00
 13 3 12 4.60 0.00
 13 3 13 0.17 0.00
 13 3 14 -0.16 0.00
 13 3 15 -1.56 0.00
 13 3 16 6.42 0.00
 13 3 17 -2.16 0.00
 13 5 0 0.66 0.00
 13 5 1 10.88 0.00
 13 5 2 -4.09 0.00
 13 5 3 1.91 0.00
 13 5 4 -2.47 0.00
 13 5 5 -3.73 0.00
 13 5 6 -3.45 0.00
 13 5 7 3.39 0.00
 13 5 8 9.10 0.00
 13 5 9 4.44 0.00
 13 5 11 2.86 0.00
 13 5 12 5.54 0.00
 13 5 13 6.70 0.00
 13 5 14 -3.46 0.00
 13 5 15 -0.51 0.00
 13 5 16 -4.64 0.00
 13 5 17 -0.90 0.00
 13 7 0 -2.18 0.00
 13 7 1 9.55 0.00
 13 7 2 3.68 0.00
 13 7 3 1.82 0.00
 13 7 4 -5.70 0.00
 13 7 5 -3.89 0.00
 13 7 6 -4.68 0.00
 13 7 7 1.27 0.00
 13 7 8 1.31 0.00
 13 7 9 -1.01 0.00
 13 7 10 -1.35 0.00
 13 7 11 10.44 0.00
 13 7 12 10.44 0.00
 13 7 13 1.73 0.00
 13 7 14 -0.63 0.00
 13 7 15 -3.87 0.00
 13 7 16 -3.12 0.00
 13 7 17 0.34 0.00
 13 9 0 7.16 0.00
 13 9 1 4.30 0.00
 13 9 2 -1.18 0.00
 13 9 3 5.63 0.00
 13 9 4 4.71 0.00
 13 9 5 -3.96 0.00
 13 9 6 -5.54 0.00
 13 9 7 -5.77 0.00
 13 9 8 -5.84 0.00
 13 9 9 1.20 0.00
 13 9 10 -3.57 0.00
 13 9 11 5.02 0.00
 13 9 12 1.47 0.00
 13 9 13 -0.51 0.00
 13 9 14 -0.03 0.00
 13 9 15 1.17 0.00
 13 9 16 0.52 0.00
 13 9 17 5.92 0.00
 13 11 0 -4.65 0.00
 13 11 1 -1.66 0.00
 13 11 2 5.21 0.00
 13 11 3 0.60 0.00
 13 11 4 -3.10 0.00
 13 11 5 -0.14 0.00
 13 11 6 -1.09 0.00
 13 11 7 -5.37 0.00
 13 11 8 0.08 0.00
 13 11 9 1.13 0.00
 13 11 10 -7.54 0.00
 13 11 11 4.28 0.00
 13 11 12 -0.07 0.00
 13 11 13 -0.80 0.00
 13 11 14 1.10 0.00
 13 11 15 2.38 0.00
 13 11 16 -0.38 0.00
 13 11 17 7.10 0.00
 13 13 0 0.93 0.00
 13 13 1 0.99 0.00
 13 13 2 -5.84 0.00
 13 13 3 7.92 0.00
 13 13 4 3.62 0.00
 13 13 5 1.71 0.00
 13 13 6 -3.29 0.00
 13 13 7 -2.08 0.00
 13 13 8 3.81 0.00
 13 13 9 0.39 0.00
 13 13 10 -7.93 0.00
 13 13 11 3.15 0.00
 13 13 12 -3.04 0.00
 13 13 13 -2.24 0.00
 13 13 14 0.53 0.00
 13 13 15 -2.93 0.00
 13 13 16 1.49 0.00
 13 15 0 -5.35 0.00
 13 15 1 -3.70 0.00
 13 15 2 -5.68 0.00
 13 15 3 -0.85 0.00
 13 15 4 0.48 0.00
 13 15 5 -1.26 0.00
 13 15 6 2.68 0.00
 13 15 7 -0.85 0.00
 13 15 8 3.84 0.00
 13 15 9 0.14 0.00
 13 15 10 -3.21 0.00
 13 15 11 -0.83 0.00
 13 15 12 3.21 0.00
 13 15 13 1.52 0.00
 13 15 14 0.96 0.00
 13 15 15 -0.05 0.00
 13 15 16 -1.52 0.00
 13 17 0 -3.49 0.00
 13 17 1 2.53 0.00
 13 17 2 -5.20 0.00
 13 17 3 2.07 0.00
 13 17 4 7.10 0.00
 13 17 5 0.80 0.00
 13 17 6 -3.44 0.00
 13 17 7 -0.06 0.00
 13 17 8 3.85 0.00
 13 17 9 -0.44 0.00
 13 17 10 -0.86 0.00
 13 17 11 -0.19 0.00
 13 17 12 2.10 0.00
 13 17 13 0.97 0.00
 13 17 14 2.71 0.00
 13 17 15 2.93 0.00
 13 19 0 0.30 0.00
 13 19 1 -6.60 0.00
 13 19 2 -4.67 0.00
 13 19 3 -0.38 0.00
 13 19 4 3.14 0.00
 13 19 5 0.73 0.00
 13 19 6 -2.36 0.00
 13 19 7 1.95 0.00
 13 19 8 2.25 0.00
 13 19 9 0.89 0.00
 13 19 10 4.83 0.00
 13 19 11 -1.84 0.00
 13 19 12 1.69 0.00
 13 19 13 3.57 0.00
 13 19 14 1.93 0.00
 13 19 15 1.39 0.00
 13 21 0 -4.25 0.00
 13 21 1 0.48 0.00
 13 21 2 -1.21 0.00
 13 21 3 -4.35 0.00
 13 21 4 -1.87 0.00
 13 21 5 -3.53 0.00
 13 21 6 2.54 0.00
 13 21 7 -4.62 0.00
 13 21 8 -0.25 0.00
 13 21 9 -1.54 0.00
 13 21 10 -0.44 0.00
 13 21 11 -0.53 0.00
 13 21 12 -0.35 0.00
 13 21 13 0.58 0.00
 13 21 14 3.17 0.00
 13 23 0 -1.80 0.00
 13 23 1 2.30 0.00
 13 23 2 -1.53 0.00
 13 23 3 -2.35 0.00
 13 23 4 0.93 0.00
 13 23 5 -2.11 0.00
 13 23 6 -2.55 0.00
 13 23 7 -1.36 0.00
 13 23 8 -4.41 0.00
 13 23 9 -0.59 0.00
 13 23 10 -0.94 0.00
 13 23 11 -1.32 0.00
 13 23 12 -3.17 0.00
 13 23 13 -2.21 0.00
 13 23 14 1.69 0.00
 13 25 0 3.72 0.00
 13 25 1 4.51 0.00
 13 25 2 4.05 0.00
 13 25 3 3.04 0.00
 13 25 4 -2.96 0.00
 13 25 5 5.98 0.00
 13 25 6 3.38 0.00
 13 25 7 -2.59 0.00
 13 25 8 -6.04 0.00
 13 25 9 0.43 0.00
 13 25 10 0.51 0.00
 13 25 11 -1.57 0.00
 13 25 12 -0.68 0.00
 13 25 13 4.95 0.00
 13 27 0 -2.03 0.00
 13 27 1 -5.72 0.00
 13 27 2 1.42 0.00
 13 27 3 -1.68 0.00
 13 27 4 -3.13 0.00
 13 27 5 4.38 0.00
 13 27 6 3.19 0.00
 13 27 7 0.44 0.00
 13 27 8 -1.07 0.00
 13 27 9 -1.66 0.00
 13 27 10 4.30 0.00
 13 27 11 1.17 0.00
 13 27 12 8.44 0.00
 13 29 0 -0.45 0.00
 13 29 1 -1.54 0.00
 13 29 2 6.28 0.00
 13 29 3 2.60 0.00
 13 29 4 -1.32 0.00
 13 29 5 2.68 0.00
 13 29 6 1.44 0.00
 13 29 7 0.30 0.00
 13 29 8 -5.39 0.00
 13 29 9 -1.19 0.00
 13 29 10 5.29 0.00
 13 31 0 -1.35 0.00
 13 31 1 0.09 0.00
 13 31 2 -0.42 0.00
 13 31 3 0.84 0.00
 13 31 4 -6.23 0.00
 13 31 5 2.02 0.00
 13 31 6 1.76 0.00
 13 31 7 2.95 0.00
 13 31 8 -2.14 0.00
 13 31 9 -1.80 0.00
 13 31 10 4.40 0.00
 13 33 0 2.62 0.00
 13 33 1 -2.12 0.00
 13 33 2 2.12 0.00
 13 33 3 -1.33 0.00
 13 33 4 -1.41 0.00
 13 33 5 0.46 0.00
 13 33 6 4.19 0.00
 13 33 7 0.03 0.00
 13 33 8 5.30 0.00
 13 33 9 -3.67 0.00
 13 35 0 2.72 0.00
 13 35 1 -3.57 0.00
 13 35 2 1.35 0.00
 13 35 3 -2.17 0.00
 13 35 4 4.45 0.00
 13 35 5 -2.47 0.00
 13 35 6 2.43 0.00
 13 35 7 -0.86 0.00
 13 35 8 3.09 0.00
 13 37 0 -2.85 0.00
 13 37 1 -0.58 0.00
 13 37 2 -1.14 0.00
 13 37 3 0.05 0.00
 13 37 4 2.39 0.00
 13 37 5 2.04 0.00
 13 37 6 0.33 0.00
 13 37 7 -1.33 0.00
 13 39 0 -3.87 0.00
 13 39 1 -2.58 0.00
 13 39 2 -4.65 0.00
 13 39 3 -0.86 0.00
 13 39 4 3.06 0.00
 13 39 5 -1.93 0.00
 13 41 0 0.06 0.00
 13 41 1 -1.08 0.00
 13 41 2 0.74 0.00
 13 41 3 -3.97 0.00
 14 0 0 16.01 0.00
 14 0 1 4.17 0.00
 14 0 2 9.33 0.00
 14 0 3 2.34 0.00
 14 0 4 -3.20 0.00
 14 0 5 -5.13 0.00
 14 0 6 5.35 0.00
 14 0 7 -2.01 0.00
 14 0 8 2.50 0.00
 14 0 9 4.71 0.00
 14 0 14 -1.63 0.00
 14 0 15 5.30 0.00
 14 0 16 -10.61 0.00
 14 2 0 -5.79 0.00
 14 2 1 -7.22 0.00
 14 2 2 -1.95 0.00
 14 2 3 -2.21 0.00
 14 2 4 -8.47 0.00
 14 2 5 -0.49 0.00
 14 2 6 -3.54 0.00
 14 2 7 -4.65 0.00
 14 2 8 3.39 0.00
 14 2 9 6.85 0.00
 14 2 14 1.91 0.00
 14 2 15 0.37 0.00
 14 2 16 0.00 0.00
 14 4 0 3.21 0.00
 14 4 1 -4.03 0.00
 14 4 2 -0.82 0.00
 14 4 3 -0.50 0.00
 14 4 4 -2.82 0.00
 14 4 5 0.64 0.00
 14 4 6 -1.12 0.00
 14 4 7 -6.24 0.00
 14 4 8 1.78 0.00
 14 4 9 6.43 0.00
 14 4 10 -5.90 0.00
 14 4 13 0.76 0.00
 14 4 14 0.09 0.00
 14 4 15 -0.60 0.00
 14 4 16 0.01 0.00
 14 6 0 -8.32 0.00
 14 6 1 0.18 0.00
 14 6 2 10.71 0.00
 14 6 3 0.14 0.00
 14 6 4 -2.21 0.00
 14 6 5 3.40 0.00
 14 6 6 0.31 0.00
 14 6 7 -0.84 0.00
 14 6 8 2.44 0.00
 14 6 9 2.99 0.00
 14 6 10 -6.12 0.00
 14 6 11 -3.74 0.00
 14 6 12 0.25 0.00
 14 6 13 1.25 0.00
 14 6 14 -1.92 0.00
 14 6 15 -0.27 0.00
 14 6 16 -3.07 0.00
 14 8 0 3.61 0.00
 14 8 1 -0.77 0.00
 14 8 2 -4.94 0.00
 14 8 3 -1.18 0.00
 14 8 4 -12.86 0.00
 14 8 5 8.26 0.00
 14 8 6 -2.66 0.00
 14 8 7 0.98 0.00
 14 8 8 -4.67 0.00
 14 8 9 -0.57 0.00
 14 8 10 -0.84 0.00
 14 8 11 0.16 0.00
 14 8 12 2.57 0.00
 14 8 13 2.54 0.00
 14 8 14 1.94 0.00
 14 8 15 1.54 0.00
 14 8 16 -4.70 0.00
 14 10 0 -6.33 0.00
 14 10 1 6.38 0.00
 14 10 2 3.27 0.00
 14 10 3 -1.88 0.00
 14 10 4 -6.81 0.00
 14 10 5 5.43 0.00
 14 10 6 0.46 0.00
 14 10 7 2.69 0.00
 14 10 8 2.48 0.00
 14 10 9 -0.70 0.00
 14 10 10 6.71 0.00
 14 10 11 -5.57 0.00
 14 10 12 -0.91 0.00
 14 10 13 0.74 0.00
 14 10 14 -0.79 0.00
 14 10 15 0.66 0.00
 14 10 16 -7.15 0.00
 14 12 0 12.33 0.00
 14 12 1 1.79 0.00
 14 12 2 -0.76 0.00
 14 12 3 -0.88 0.00
 14 12 4 -2.84 0.00
 14 12 5 -0.36 0.00
 14 12 6 -0.94 0.00
 14 12 7 0.50 0.00
 14 12 8 1.84 0.00
 14 12 9 -4.04 0.00
 14 12 10 0.67 0.00
 14 12 11 -1.49 0.00
 14 12 12 -4.65 0.00
 14 12 13 1.85 0.00
 14 12 14 3.80 0.00
 14 12 15 2.63 0.00
 14 12 16 -2.02 0.00
 14 14 0 6.51 0.00
 14 14 1 6.95 0.00
 14 14 2 -1.42 0.00
 14 14 3 -1.17 0.00
 14 14 4 -3.15 0.00
 14 14 5 -1.86 0.00
 14 14 6 0.74 0.00
 14 14 7 3.76 0.00
 14 14 8 -3.94 0.00
 14 14 9 -6.07 0.00
 14 14 10 -0.79 0.00
 14 14 11 -0.40 0.00
 14 14 12 -4.49 0.00
 14 14 13 1.34 0.00
 14 14 14 -0.79 0.00
 14 14 15 -2.22 0.00
 14 16 0 11.61 0.00
 14 16 1 -0.79 0.00
 14 16 2 -1.62 0.00
 14 16 3 4.35 0.00
 14 16 4 5.59 0.00
 14 16 5 -0.02 0.00
 14 16 6 -2.75 0.00
 14 16 7 0.80 0.00
 14 16 8 3.30 0.00
 14 16 9 -1.42 0.00
 14 16 10 2.75 0.00
 14 16 11 0.41 0.00
 14 16 12 -3.43 0.00
 14 16 13 -2.34 0.00
 14 16 14 6.90 0.00
 14 16 15 4.05 0.00
 14 18 0 10.49 0.00
 14 18 1 -1.83 0.00
 14 18 2 -1.14 0.00
 14 18 3 3.54 0.00
 14 18 4 3.22 0.00
 14 18 5 -0.75 0.00
 14 18 6 3.37 0.00
 14 18 7 -2.07 0.00
 14 18 8 -0.12 0.00
 14 18 9 -0.24 0.00
 14 18 10 0.30 0.00
 14 18 11 1.78 0.00
 14 18 12 -0.57 0.00
 14 18 13 -1.22 0.00
 14 18 14 -0.93 0.00
 14 18 15 2.14 0.00
 14 20 0 -2.60 0.00
 14 20 1 -3.52 0.00
 14 20 2 1.39 0.00
 14 20 3 0.95 0.00
 14 20 4 7.94 0.00
 14 20 5 -4.18 0.00
 14 20 6 -1.87 0.00
 14 20 7 0.50 0.00
 14 20 8 -1.29 0.00
 14 20 9 2.78 0.00
 14 20 10 2.60 0.00
 14 20 11 -1.04 0.00
 14 20 12 0.59 0.00
 14 20 13 -0.56 0.00
 14 20 14 -1.70 0.00
 14 22 0 0.96 0.00
 14 22 1 -6.25 0.00
 14 22 2 0.58 0.00
 14 22 3 3.62 0.00
 14 22 4 -4.39 0.00
 14 22 5 3.50 0.00
 14 22 6 0.94 0.00
 14 22 7 -0.88 0.00
 14 22 8 0.72 0.00
 14 22 9 0.50 0.00
 14 22 10 1.23 0.00
 14 22 11 -0.90 0.00
 14 22 12 -0.53 0.00
 14 22 13 2.31 0.00
 14 24 0 -0.89 0.00
 14 24 1 1.46 0.00
 14 24 2 -1.19 0.00
 14 24 3 2.05 0.00
 14 24 4 -0.02 0.00
 14 24 5 4.91 0.00
 14 24 6 -0.82 0.00
 14 24 7 -0.35 0.00
 14 24 8 2.12 0.00
 14 24 9 1.51 0.00
 14 24 10 2.63 0.00
 14 24 11 0.04 0.00
 14 24 12 1.37 0.00
 14 24 13 3.66 0.00
 14 26 0 -4.76 0.00
 14 26 1 -1.57 0.00
 14 26 2 0.01 0.00
 14 26 3 1.36 0.00
 14 26 4 -2.25 0.00
 14 26 5 1.06 0.00
 14 26 6 -1.16 0.00
 14 26 7 -2.29 0.00
 14 26 8 -1.14 0.00
 14 26 9 0.66 0.00
 14 26 10 3.58 0.00
 14 26 11 -3.51 0.00
 14 26 12 7.14 0.00
 14 28 0 -0.71 0.00
 14 28 1 -4.07 0.00
 14 28 2 -0.03 0.00
 14 28 3 0.28 0.00
 14 28 4 -1.20 0.00
 14 28 5 5.80 0.00
 14 28 6 -2.18 0.00
 14 28 7 2.24 0.00
 14 28 8 -1.35 0.00
 14 28 9 3.49 0.00
 14 28 10 0.93 0.00
 14 30 0 -6.07 0.00
 14 30 1 -1.10 0.00
 14 30 2 3.06 0.00
 14 30 3 1.47 0.00
 14 30 4 -1.36 0.00
 14 30 5 3.03 0.00
 14 30 6 -1.31 0.00
 14 30 7 -1.71 0.00
 14 30 8 0.61 0.00
 14 30 9 2.29 0.00
 14 30 10 -1.97 0.00
 14 32 0 -1.53 0.00
 14 32 1 1.50 0.00
 14 32 2 -2.05 0.00
 14 32 3 -4.82 0.00
 14 32 4 -2.08 0.00
 14 32 5 -1.12 0.00
 14 32 6 0.45 0.00
 14 32 7 -4.17 0.00
 14 32 8 -0.18 0.00
 14 32 9 -1.21 0.00
 14 34 0 0.11 0.00
 14 34 1 -3.88 0.00
 14 34 2 1.06 0.00
 14 34 3 -7.57 0.00
 14 34 4 1.19 0.00
 14 34 5 2.30 0.00
 14 34 6 -2.47 0.00
 14 34 7 2.27 0.00
 14 34 8 -0.27 0.00
 14 36 0 0.45 0.00
 14 36 1 1.59 0.00
 14 36 2 1.02 0.00
 14 36 3 2.35 0.00
 14 36 4 4.01 0.00
 14 36 5 4.02 0.00
 14 36 6 -1.73 0.00
 14 36 7 4.67 0.00
 14 38 0 1.13 0.00
 14 38 1 3.63 0.00
 14 38 2 -1.82 0.00
 14 38 3 0.76 0.00
 14 38 4 2.40 0.00
 14 38 5 -0.08 0.00
 14 40 0 -0.63 0.00
 14 40 1 0.27 0.00
 14 40 2 0.33 0.00
 15 1 0 -5.30 0.00
 15 1 1 -8.25 0.00
 15 1 2 -2.14 0.00
 15 1 3 9.31 0.00
 15 1 4 -0.20 0.00
 15 1 5 2.37 0.00
 15 1 6 2.09 0.00
 15 1 7 -1.51 0.00
 15 1 8 2.03 0.00
 15 1 9 11.95 0.00
 15 1 10 1.43 0.00
 15 1 11 8.56 0.00
 15 1 12 -5.99 0.00
 15 1 13 9.02 0.00
 15 1 14 -0.28 0.00
 15 1 15 -4.78 0.00
 15 1 16 0.76 0.00
 15 3 0 -7.74 0.00
 15 3 1 -12.76 0.00
 15 3 2 -9.41 0.00
 15 3 3 6.39 0.00
 15 3 4 -1.89 0.00
 15 3 5 -0.06 0.00
 15 3 6 -5.83 0.00
 15 3 7 -5.69 0.00
 15 3 8 -6.22 0.00
 15 3 9 2.76 0.00
 15 3 10 1.36 0.00
 15 3 11 -0.12 0.00
 15 3 12 -6.34 0.00
 15 3 13 2.95 0.00
 15 3 14 0.63 0.00
 15 3 15 -1.16 0.00
 15 3 16 -1.06 0.00
 15 5 0 -2.07 0.00
 15 5 1 -5.75 0.00
 15 5 2 -0.75 0.00
 15 5 3 9.00 0.00
 15 5 4 4.60 0.00
 15 5 5 0.23 0.00
 15 5 6 -3.55 0.00
 15 5 7 -9.63 0.00
 15 5 8 -4.55 0.00
 15 5 9 -7.26 0.00
 15 5 10 2.62 0.00
 15 5 11 -4.18 0.00
 15 5 12 -2.52 0.00
 15 5 13 -2.21 0.00
 15 5 14 5.24 0.00
 15 5 15 1.87 0.00
 15 5 16 -0.83 0.00
 15 7 0 -1.15 0.00
 15 7 1 -2.65 0.00
 15 7 2 -0.44 0.00
 15 7 3 4.28 0.00
 15 7 4 0.36 0.00
 15 7 5 2.01 0.00
 15 7 6 6.14 0.00
 15 7 7 1.50 0.00
 15 7 8 -5.92 0.00
 15 7 9 -12.45 0.00
 15 7 10 0.64 0.00
 15 7 11 -0.84 0.00
 15 7 12 -1.22 0.00
 15 7 13 -0.81 0.00
 15 7 14 6.10 0.00
 15 7 15 -0.41 0.00
 15 7 16 2.78 0.00
 15 9 0 -1.97 0.00
 15 9 1 1.23 0.00
 15 9 2 -3.39 0.00
 15 9 3 -5.40 0.00
 15 9 4 4.65 0.00
 15 9 5 0.69 0.00
 15 9 6 7.49 0.00
 15 9 7 0.84 0.00
 15 9 8 2.80 0.00
 15 9 9 -0.18 0.00
 15 9 10 5.70 0.00
 15 9 11 -2.90 0.00
 15 9 12 -2.19 0.00
 15 9 13 0.16 0.00
 15 9 14 4.25 0.00
 15 9 15 -3.08 0.00
 15 11 0 -2.46 0.00
 15 11 1 1.38 0.00
 15 11 2 -1.26 0.00
 15 11 3 -6.45 0.00
 15 11 4 -2.84 0.00
 15 11 5 -0.53 0.00
 15 11 6 7.30 0.00
 15 11 7 4.55 0.00
 15 11 8 3.91 0.00
 15 11 9 -0.02 0.00
 15 11 10 2.76 0.00
 15 11 11 -3.51 0.00
 15 11 12 0.72 0.00
 15 11 13 -2.71 0.00
 15 11 14 1.43 0.00
 15 11 15 -0.85 0.00
 15 13 0 7.84 0.00
 15 13 1 11.73 0.00
 15 13 2 2.36 0.00
 15 13 3 0.01 0.00
 15 13 4 -1.44 0.00
 15 13 5 6.34 0.00
 15 13 6 -3.19 0.00
 15 13 7 3.99 0.00
 15 13 8 2.10 0.00
 15 13 9 0.00 0.00
 15 13 10 1.23 0.00
 15 13 11 -0.17 0.00
 15 13 12 2.91 0.00
 15 13 13 -2.35 0.00
 15 13 14 -2.99 0.00
 15 13 15 0.72 0.00
 15 15 0 10.95 0.00
 15 15 1 0.75 0.00
 15 15 2 -1.48 0.00
 15 15 3 -7.70 0.00
 15 15 4 2.37 0.00
 15 15 5 -2.33 0.00
 15 15 6 -2.30 0.00
 15 15 7 4.74 0.00
 15 15 8 -1.77 0.00
 15 15 9 -1.76 0.00
 15 15 10 4.26 0.00
 15 15 11 -2.01 0.00
 15 15 12 4.08 0.00
 15 15 13 0.28 0.00
 15 15 14 -3.04 0.00
 15 15 15 4.46 0.00
 15 17 0 1.45 0.00
 15 17 1 5.92 0.00
 15 17 2 -3.09 0.00
 15 17 3 -5.56 0.00
 15 17 4 1.74 0.00
 15 17 5 1.15 0.00
 15 17 6 -8.06 0.00
 15 17 7 -0.60 0.00
 15 17 8 0.91 0.00
 15 17 9 1.01 0.00
 15 17 10 -0.83 0.00
 15 17 11 1.39 0.00
 15 17 12 -1.07 0.00
 15 17 13 -0.79 0.00
 15 17 14 -0.81 0.00
 15 19 0 8.22 0.00
 15 19 1 -0.54 0.00
 15 19 2 -3.05 0.00
 15 19 3 2.02 0.00
 15 19 4 4.43 0.00
 15 19 5 0.29 0.00
 15 19 6 -7.91 0.00
 15 19 7 1.92 0.00
 15 19 8 -0.33 0.00
 15 19 9 -1.52 0.00
 15 19 10 -2.69 0.00
 15 19 11 2.50 0.00
 15 19 12 -4.56 0.00
 15 19 13 -0.27 0.00
 15 19 14 -0.78 0.00
 15 21 0 -0.96 0.00
 15 21 1 4.47 0.00
 15 21 2 5.81 0.00
 15 21 3 3.83 0.00
 15 21 4 3.55 0.00
 15 21 5 4.37 0.00
 15 21 6 0.39 0.00
 15 21 7 0.21 0.00
 15 21 8 0.30 0.00
 15 21 9 2.69 0.00
 15 21 10 -4.60 0.00
 15 21 11 2.52 0.00
 15 21 12 0.83 0.00
 15 21 13 -1.00 0.00
 15 23 0 2.31 0.00
 15 23 1 -2.70 0.00
 15 23 2 1.38 0.00
 15 23 3 -2.21 0.00
 15 23 4 3.87 0.00
 15 23 5 0.74 0.00
 15 23 6 -3.64 0.00
 15 23 7 4.13 0.00
 15 23 8 4.48 0.00
 15 23 9 1.36 0.00
 15 23 10 -1.04 0.00
 15 23 11 -0.41 0.00
 15 23 12 1.35 0.00
 15 25 0 2.80 0.00
 15 25 1 -1.48 0.00
 15 25 2 2.40 0.00
 15 25 3 -2.00 0.00
 15 25 4 -1.56 0.00
 15 25 5 0.57 0.00
 15 25 6 -0.15 0.00
 15 25 7 -3.12 0.00
 15 25 8 1.83 0.00
 15 25 9 2.75 0.00
 15 25 10 -0.36 0.00
 15 25 11 -4.60 0.00
 15 25 12 -0.73 0.00
 15 27 0 -2.20 0.00
 15 27 1 -3.03 0.00
 15 27 2 -1.07 0.00
 15 27 3 -4.10 0.00
 15 27 4 2.20 0.00
 15 27 5 -1.16 0.00
 15 27 6 1.61 0.00
 15 27 7 -0.02 0.00
 15 27 8 4.74 0.00
 15 27 9 3.26 0.00
 15 27 10 -2.59 0.00
 15 29 0 -5.38 0.00
 15 29 1 2.86 0.00
 15 29 2 2.32 0.00
 15 29 3 1.48 0.00
 15 29 4 1.58 0.00
 15 29 5 -2.91 0.00
 15 29 6 0.15 0.00
 15 29 7 -2.63 0.00
 15 29 8 -3.66 0.00
 15 29 9 5.06 0.00
 15 29 10 -1.88 0.00
 15 31 0 -1.50 0.00
 15 31 1 2.54 0.00
 15 31 2 -2.54 0.00
 15 31 3 -2.91 0.00
 15 31 4 2.05 0.00
 15 31 5 -2.39 0.00
 15 31 6 2.90 0.00
 15 31 7 0.18 0.00
 15 31 8 -1.37 0.00
 15 31 9 0.62 0.00
 15 33 0 -1.10 0.00
 15 33 1 1.23 0.00
 15 33 2 -2.54 0.00
 15 33 3 -2.56 0.00
 15 33 4 -3.03 0.00
 15 33 5 0.51 0.00
 15 33 6 1.46 0.00
 15 33 7 -0.78 0.00
 15 33 8 -1.69 0.00
 15 35 0 -0.05 0.00
 15 35 1 1.90 0.00
 15 35 2 -4.39 0.00
 15 35 3 1.62 0.00
 15 35 4 -1.67 0.00
 15 35 5 -0.27 0.00
 15 35 6 -5.94 0.00
 15 35 7 2.11 0.00
 15 37 0 1.39 0.00
 15 37 1 3.38 0.00
 15 37 2 1.84 0.00
 15 37 3 1.38 0.00
 15 37 4 -4.42 0.00
 15 37 5 1.49 0.00
 16 0 0 -0.25 0.00
 16 0 1 10.13 0.00
 16 0 2 1.87 0.00
 16 0 3 -1.92 0.00
 16 0 4 5.06 0.00
 16 0 5 4.19 0.00
 16 0 6 3.51 0.00
 16 0 7 5.23 0.00
 16 0 8 -10.41 0.00
 16 0 9 -3.83 0.00
 16 0 10 -2.05 0.00
 16 0 11 0.96 0.00
 16 0 12 3.73 0.00
 16 0 13 0.64 0.00
 16 0 14 1.14 0.00
 16 0 15 -2.72 0.00
 16 2 0 -3.44 0.00
 16 2 1 -2.68 0.00
 16 2 2 -6.88 0.00
 16 2 3 3.07 0.00
 16 2 4 0.22 0.00
 16 2 5 3.56 0.00
 16 2 6 0.68 0.00
 16 2 7 5.97 0.00
 16 2 8 -5.61 0.00
 16 2 9 -4.26 0.00
 16 2 10 2.13 0.00
 16 2 11 7.62 0.00
 16 2 12 -0.93 0.00
 16 2 13 2.46 0.00
 16 2 14 -1.37 0.00
 16 2 15 -2.07 0.00
 16 4 0 -2.30 0.00
 16 4 1 0.06 0.00
 16 4 2 0.66 0.00
 16 4 3 -2.64 0.00
 16 4 4 4.34 0.00
 16 4 5 2.36 0.00
 16 4 6 0.90 0.00
 16 4 7 -3.36 0.00
 16 4 8 -4.55 0.00
 16 4 9 -3.01 0.00
 16 4 10 8.71 0.00
 16 4 11 3.17 0.00
 16 4 12 7.83 0.00
 16 4 13 0.13 0.00
 16 4 14 -2.76 0.00
 16 4 15 -1.32 0.00
 16 6 0 -5.13 0.00
 16 6 1 1.87 0.00
 16 6 2 7.42 0.00
 16 6 3 -0.21 0.00
 16 6 4 4.37 0.00
 16 6 5 -3.68 0.00
 16 6 6 4.46 0.00
 16 6 7 -0.73 0.00
 16 6 8 -6.16 0.00
 16 6 9 -2.12 0.00
 16 6 10 1.27 0.00
 16 6 11 9.58 0.00
 16 6 12 6.89 0.00
 16 6 13 -3.69 0.00
 16 6 14 0.77 0.00
 16 6 15 -0.81 0.00
 16 8 0 2.62 0.00
 16 8 1 -1.33 0.00
 16 8 2 4.74 0.00
 16 8 3 -4.23 0.00
 16 8 4 -1.86 0.00
 16 8 5 0.50 0.00
 16 8 6 0.65 0.00
 16 8 7 -0.90 0.00
 16 8 8 -6.87 0.00
 16 8 9 1.42 0.00
 16 8 10 -6.43 0.00
 16 8 11 3.72 0.00
 16 8 12 3.97 0.00
 16 8 13 -1.16 0.00
 16 8 14 2.68 0.00
 16 8 15 3.89 0.00
 16 10 0 0.72 0.00
 16 10 1 -2.72 0.00
 16 10 2 7.05 0.00
 16 10 3 -7.24 0.00
 16 10 4 2.72 0.00
 16 10 5 -3.61 0.00
 16 10 6 5.35 0.00
 16 10 7 0.01 0.00
 16 10 8 2.65 0.00
 16 10 9 3.67 0.00
 16 10 10 -0.99 0.00
 16 10 11 0.52 0.00
 16 10 12 3.77 0.00
 16 10 13 -1.80 0.00
 16 10 14 3.05 0.00
 16 10 15 -1.34 0.00
 16 12 0 2.88 0.00
 16 12 1 -3.86 0.00
 16 12 2 5.50 0.00
 16 12 3 0.45 0.00
 16 12 4 7.51 0.00
 16 12 5 -1.40 0.00
 16 12 6 0.61 0.00
 16 12 7 -0.25 0.00
 16 12 8 5.31 0.00
 16 12 9 0.20 0.00
 16 12 10 -1.39 0.00
 16 12 11 -0.11 0.00
 16 12 12 4.78 0.00
 16 12 13 -0.44 0.00
 16 12 14 0.31 0.00
 16 14 0 8.39 0.00
 16 14 1 0.41 0.00
 16 14 2 -2.93 0.00
 16 14 3 0.78 0.00
 16 14 4 1.02 0.00
 16 14 5 0.90 0.00
 16 14 6 1.81 0.00
 16 14 7 -0.47 0.00
 16 14 8 -2.62 0.00
 16 14 9 -2.60 0.00
 16 14 10 -3.89 0.00
 16 14 11 4.07 0.00
 16 14 12 1.49 0.00
 16 14 13 -0.45 0.00
 16 14 14 -0.13 0.00
 16 16 0 0.74 0.00
 16 16 1 -4.13 0.00
 16 16 2 -7.47 0.00
 16 16 3 -0.73 0.00
 16 16 4 4.35 0.00
 16 16 5 0.89 0.00
 16 16 6 -4.34 0.00
 16 16 7 1.69 0.00
 16 16 8 2.42 0.00
 16 16 9 3.38 0.00
 16 16 10 -1.98 0.00
 16 16 11 1.89 0.00
 16 16 12 1.00 0.00
 16 16 13 -2.23 0.00
 16 16 14 1.77 0.00
 16 18 0 10.35 0.00
 16 18 1 -0.64 0.00
 16 18 2 -8.47 0.00
 16 18 3 -0.24 0.00
 16 18 4 -0.94 0.00
 16 18 5 0.84 0.00
 16 18 6 2.95 0.00
 16 18 7 -0.67 0.00
 16 18 8 2.01 0.00
 16 18 9 2.78 0.00
 16 18 10 -2.51 0.00
 16 18 11 3.15 0.00
 16 18 12 -1.69 0.00
 16 18 13 2.18 0.00
 16 20 0 -4.54 0.00
 16 20 1 1.08 0.00
 16 20 2 -2.35 0.00
 16 20 3 -0.91 0.00
 16 20 4 3.07 0.00
 16 20 5 -2.02 0.00
 16 20 6 -0.71 0.00
 16 20 7 -1.29 0.00
 16 20 8 -0.07 0.00
 16 20 9 -2.52 0.00
 16 20 10 1.83 0.00
 16 20 11 -4.59 0.00
 16 20 12 1.70 0.00
 16 20 13 -1.23 0.00
 16 22 0 -1.10 0.00
 16 22 1 -0.40 0.00
 16 22 2 -1.82 0.00
 16 22 3 3.37 0.00
 16 22 4 -7.54 0.00
 16 22 5 -1.38 0.00
 16 22 6 -0.59 0.00
 16 22 7 -1.88 0.00
 16 22 8 -0.49 0.00
 16 22 9 -1.22 0.00
 16 22 10 1.15 0.00
 16 22 11 -1.65 0.00
 16 22 12 -2.03 0.00
 16 24 0 3.06 0.00
 16 24 1 4.58 0.00
 16 24 2 1.66 0.00
 16 24 3 -5.41 0.00
 16 24 4 0.75 0.00
 16 24 5 -1.14 0.00
 16 24 6 4.64 0.00
 16 24 7 0.18 0.00
 16 24 8 1.61 0.00
 16 24 9 3.81 0.00
 16 24 10 0.90 0.00
 16 24 11 -1.89 0.00
 16 26 0 3.09 0.00
 16 26 1 3.52 0.00
 16 26 2 4.79 0.00
 16 26 3 -3.05 0.00
 16 26 4 2.79 0.00
 16 26 5 -10.35 0.00
 16 26 6 3.28 0.00
 16 26 7 -1.57 0.00
 16 26 8 -2.45 0.00
 16 26 9 0.95 0.00
 16 26 10 0.09 0.00
 16 28 0 3.07 0.00
 16 28 1 1.56 0.00
 16 28 2 1.99 0.00
 16 28 3 -0.50 0.00
 16 28 4 -0.66 0.00
 16 28 5 -0.43 0.00
 16 28 6 1.34 0.00
 16 28 7 -0.86 0.00
 16 28 8 0.34 0.00
 16 28 9 -1.51 0.00
 16 28 10 4.37 0.00
 16 30 0 -2.04 0.00
 16 30 1 3.27 0.00
 16 30 2 1.00 0.00
 16 30 3 6.30 0.00
 16 30 4 -1.82 0.00
 16 30 5 -0.15 0.00
 16 30 6 2.77 0.00
 16 30 7 0.89 0.00
 16 30 8 3.33 0.00
 16 30 9 -0.31 0.00
 16 32 0 2.17 0.00
 16 32 1 2.93 0.00
 16 32 2 -0.26 0.00
 16 32 3 1.07 0.00
 16 32 4 -1.60 0.00
 16 32 5 1.18 0.00
 16 32 6 -0.06 0.00
 16 32 7 -2.89 0.00
 16 32 8 2.84 0.00
 16 34 0 2.02 0.00
 16 34 1 0.24 0.00
 16 34 2 -2.07 0.00
 16 34 3 0.32 0.00
 16 34 4 -1.62 0.00
 16 34 5 -0.15 0.00
 16 34 6 -1.09 0.00
 16 36 0 -11.13 0.00
 16 36 1 1.05 0.00
 16 36 2 -6.96 0.00
 16 36 3 1.15 0.00
 16 36 4 -2.30 0.00
 17 1 0 3.78 0.00
 17 1 1 9.61 0.00
 17 1 2 2.00 0.00
 17 1 3 -3.59 0.00
 17 1 4 -3.47 0.00
 17 1 5 1.96 0.00
 17 1 6 0.80 0.00
 17 1 7 3.17 0.00
 17 1 8 0.03 0.00
 17 1 9 -5.88 0.00
 17 1 10 -2.03 0.00
 17 1 11 -7.33 0.00
 17 1 12 5.96 0.00
 17 1 13 3.38 0.00
 17 1 14 2.47 0.00
 17 3 0 -0.39 0.00
 17 3 1 5.09 0.00
 17 3 2 -1.87 0.00
 17 3 3 -5.19 0.00
 17 3 4 1.22 0.00
 17 3 5 -4.16 0.00
 17 3 6 2.43 0.00
 17 3 7 4.25 0.00
 17 3 8 -2.16 0.00
 17 3 9 -3.98 0.00
 17 3 10 -0.94 0.00
 17 3 11 -4.61 0.00
 17 3 12 3.36 0.00
 17 3 13 2.02 0.00
 17 3 14 0.17 0.00
 17 5 0 -0.76 0.00
 17 5 1 6.44 0.00
 17 5 2 6.21 0.00
 17 5 3 1.37 0.00
 17 5 4 0.40 0.00
 17 5 5 2.41 0.00
 17 5 6 3.92 0.00
 17 5 7 1.65 0.00
 17 5 8 1.72 0.00
 17 5 9 -1.04 0.00
 17 5 10 -1.07 0.00
 17 5 11 3.26 0.00
 17 5 12 1.07 0.00
 17 5 13 -3.79 0.00
 17 5 14 2.74 0.00
 17 7 0 3.25 0.00
 17 7 1 1.29 0.00
 17 7 2 3.84 0.00
 17 7 3 -1.30 0.00
 17 7 4 -6.64 0.00
 17 7 5 -3.30 0.00
 17 7 6 2.33 0.00
 17 7 7 10.04 0.00
 17 7 8 -3.80 0.00
 17 7 9 -3.47 0.00
 17 7 10 -2.56 0.00
 17 7 11 3.64 0.00
 17 7 12 -2.16 0.00
 17 7 13 6.43 0.00
 17 7 14 -6.15 0.00
 17 9 0 1.18 0.00
 17 9 1 -1.43 0.00
 17 9 2 6.03 0.00
 17 9 3 -4.87 0.00
 17 9 4 -9.99 0.00
 17 9 5 0.00 0.00
 17 9 6 0.15 0.00
 17 9 7 2.31 0.00
 17 9 8 4.30 0.00
 17 9 9 3.53 0.00
 17 9 10 -0.47 0.00
 17 9 11 1.74 0.00
 17 9 12 -0.15 0.00
 17 9 13 7.47 0.00
 17 9 14 -4.49 0.00
 17 11 0 0.36 0.00
 17 11 1 -2.31 0.00
 17 11 2 4.01 0.00
 17 11 3 0.33 0.00
 17 11 4 -3.18 0.00
 17 11 5 -5.72 0.00
 17 11 6 2.71 0.00
 17 11 7 -0.91 0.00
 17 11 8 2.40 0.00
 17 11 9 -1.25 0.00
 17 11 10 -2.81 0.00
 17 11 11 -1.31 0.00
 17 11 12 6.02 0.00
 17 11 13 3.43 0.00
 17 11 14 -0.80 0.00
 17 13 0 -5.77 0.00
 17 13 1 0.58 0.00
 17 13 2 3.63 0.00
 17 13 3 3.91 0.00
 17 13 4 -1.58 0.00
 17 13 5 -0.48 0.00
 17 13 6 0.18 0.00
 17 13 7 -8.63 0.00
 17 13 8 -0.13 0.00
 17 13 9 -3.85 0.00
 17 13 10 -4.77 0.00
 17 13 11 0.87 0.00
 17 13 12 3.77 0.00
 17 13 13 -0.17 0.00
 17 15 0 -2.11 0.00
 17 15 1 -0.20 0.00
 17 15 2 -9.02 0.00
 17 15 3 5.72 0.00
 17 15 4 1.61 0.00
 17 15 5 -0.64 0.00
 17 15 6 -0.74 0.00
 17 15 7 0.72 0.00
 17 15 8 -3.24 0.00
 17 15 9 -3.11 0.00
 17 15 10 -2.20 0.00
 17 15 11 -0.16 0.00
 17 15 12 0.13 0.00
 17 15 13 -0.32 0.00
 17 17 0 -3.18 0.00
 17 17 1 2.65 0.00
 17 17 2 -6.87 0.00
 17 17 3 2.41 0.00
 17 17 4 1.08 0.00
 17 17 5 3.35 0.00
 17 17 6 1.23 0.00
 17 17 7 -0.21 0.00
 17 17 8 1.88 0.00
 17 17 9 1.83 0.00
 17 17 10 -1.03 0.00
 17 17 11 2.55 0.00
 17 17 12 -2.83 0.00
 17 17 13 0.27 0.00
 17 19 0 6.69 0.00
 17 19 1 -2.53 0.00
 17 19 2 -3.84 0.00
 17 19 3 1.11 0.00
 17 19 4 2.90 0.00
 17 19 5 -4.11 0.00
 17 19 6 0.56 0.00
 17 19 7 0.15 0.00
 17 19 8 0.92 0.00
 17 19 9 -2.22 0.00
 17 19 10 1.08 0.00
 17 19 11 3.82 0.00
 17 19 12 -0.15 0.00
 17 21 0 -7.99 0.00
 17 21 1 -1.68 0.00
 17 21 2 0.79 0.00
 17 21 3 2.45 0.00
 17 21 4 -1.60 0.00
 17 21 5 -1.71 0.00
 17 21 6 1.31 0.00
 17 21 7 0.15 0.00
 17 21 8 -3.13 0.00
 17 21 9 1.30 0.00
 17 21 10 1.40 0.00
 17 21 11 1.72 0.00
 17 23 0 -5.57 0.00
 17 23 1 2.88 0.00
 17 23 2 -1.65 0.00
 17 23 3 1.39 0.00
 17 23 4 -4.16 0.00
 17 23 5 0.56 0.00
 17 23 6 1.11 0.00
 17 23 7 3.52 0.00
 17 23 8 1.54 0.00
 17 23 9 0.00 0.00
 17 23 10 -0.19 0.00
 17 23 11 3.57 0.00
 17 25 0 1.89 0.00
 17 25 1 1.89 0.00
 17 25 2 0.68 0.00
 17 25 3 2.44 0.00
 17 25 4 -6.84 0.00
 17 25 5 -0.11 0.00
 17 25 6 1.19 0.00
 17 25 7 0.03 0.00
 17 25 8 -1.23 0.00
 17 25 9 1.54 0.00
 17 25 10 -0.97 0.00
 17 27 0 2.25 0.00
 17 27 1 1.29 0.00
 17 27 2 1.41 0.00
 17 27 3 0.94 0.00
 17 27 4 -4.18 0.00
 17 27 5 1.54 0.00
 17 27 6 -0.63 0.00
 17 27 7 0.58 0.00
 17 27 8 0.08 0.00
 17 27 9 -0.67 0.00
 17 29 0 -2.41 0.00
 17 29 1 -1.49 0.00
 17 29 2 3.64 0.00
 17 29 3 2.70 0.00
 17 29 4 -4.33 0.00
 17 29 5 -1.84 0.00
 17 29 6 -2.69 0.00
 17 29 7 2.18 0.00
 17 29 8 -2.70 0.00
 17 31 0 2.85 0.00
 17 31 1 -0.77 0.00
 17 31 2 2.63 0.00
 17 31 3 0.19 0.00
 17 31 4 3.14 0.00
 17 31 5 -1.03 0.00
 17 31 6 -1.09 0.00
 17 31 7 -1.10 0.00
 17 33 0 0.83 0.00
 17 33 1 -2.04 0.00
 17 33 2 1.59 0.00
 17 33 3 0.25 0.00
 17 33 4 0.97 0.00
 17 33 5 -0.46 0.00
 18 0 0 -2.25 0.00
 18 0 1 -0.27 0.00
 18 0 2 -2.50 0.00
 18 0 3 -1.37 0.00
 18 0 4 -2.78 0.00
 18 0 5 -5.43 0.00
 18 0 6 -5.18 0.00
 18 0 7 -2.18 0.00
 18 0 8 10.93 0.00
 18 0 9 10.11 0.00
 18 0 10 0.85 0.00
 18 0 11 -4.31 0.00
 18 0 12 6.26 0.00
 18 0 13 -4.53 0.00
 18 2 0 7.35 0.00
 18 2 1 -8.48 0.00
 18 2 2 -1.79 0.00
 18 2 3 2.37 0.00
 18 2 4 1.76 0.00
 18 2 5 -7.22 0.00
 18 2 6 -3.04 0.00
 18 2 7 -0.23 0.00
 18 2 8 8.32 0.00
 18 2 9 0.55 0.00
 18 2 10 -2.36 0.00
 18 2 11 -6.43 0.00
 18 2 12 -5.37 0.00
 18 2 13 -0.52 0.00
 18 4 0 3.74 0.00
 18 4 1 -2.65 0.00
 18 4 2 5.70 0.00
 18 4 3 1.99 0.00
 18 4 4 0.69 0.00
 18 4 5 0.33 0.00
 18 4 6 -1.39 0.00
 18 4 7 -3.66 0.00
 18 4 8 4.88 0.00
 18 4 9 0.20 0.00
 18 4 10 -4.36 0.00
 18 4 11 -4.51 0.00
 18 4 12 -2.57 0.00
 18 4 13 7.46 0.00
 18 6 0 -0.41 0.00
 18 6 1 -0.54 0.00
 18 6 2 1.57 0.00
 18 6 3 0.13 0.00
 18 6 4 -3.68 0.00
 18 6 5 -1.92 0.00
 18 6 6 5.22 0.00
 18 6 7 0.81 0.00
 18 6 8 2.63 0.00
 18 6 9 -3.15 0.00
 18 6 10 -5.99 0.00
 18 6 11 0.11 0.00
 18 6 12 -3.99 0.00
 18 6 13 2.20 0.00
 18 8 0 -6.67 0.00
 18 8 1 5.12 0.00
 18 8 2 -1.27 0.00
 18 8 3 -1.51 0.00
 18 8 4 -13.60 0.00
 18 8 5 2.47 0.00
 18 8 6 2.35 0.00
 18 8 7 3.74 0.00
 18 8 8 3.90 0.00
 18 8 9 -2.01 0.00
 18 8 10 -5.48 0.00
 18 8 11 -5.51 0.00
 18 8 12 0.64 0.00
 18 8 13 -0.30 0.00
 18 10 0 -5.76 0.00
 18 10 1 5.63 0.00
 18 10 2 -6.19 0.00
 18 10 3 -2.80 0.00
 18 10 4 -14.21 0.00
 18 10 5 2.99 0.00
 18 10 6 2.96 0.00
 18 10 7 3.90 0.00
 18 10 8 4.73 0.00
 18 10 9 -0.93 0.00
 18 10 10 -1.11 0.00
 18 10 11 0.60 0.00
 18 10 12 0.57 0.00
 18 10 13 -1.37 0.00
 18 12 0 -8.45 0.00
 18 12 1 5.63 0.00
 18 12 2 2.95 0.00
 18 12 3 1.46 0.00
 18 12 4 -3.47 0.00
 18 12 5 -1.21 0.00
 18 12 6 -3.69 0.00
 18 12 7 3.90 0.00
 18 12 8 -0.30 0.00
 18 12 9 -2.37 0.00
 18 12 10 -2.04 0.00
 18 12 11 1.42 0.00
 18 12 12 -3.54 0.00
 18 12 13 -3.20 0.00
 18 14 0 5.55 0.00
 18 14 1 3.51 0.00
 18 14 2 2.48 0.00
 18 14 3 1.31 0.00
 18 14 4 0.49 0.00
 18 14 5 -0.94 0.00
 18 14 6 0.36 0.00
 18 14 7 1.84 0.00
 18 14 8 -4.31 0.00
 18 14 9 -3.31 0.00
 18 14 10 -1.55 0.00
 18 14 11 3.22 0.00
 18 14 12 -5.54 0.00
 18 16 0 -7.94 0.00
 18 16 1 -3.87 0.00
 18 16 2 -2.27 0.00
 18 16 3 -4.20 0.00
 18 16 4 3.00 0.00
 18 16 5 -3.13 0.00
 18 16 6 -3.61 0.00
 18 16 7 3.27 0.00
 18 16 8 1.12 0.00
 18 16 9 -4.73 0.00
 18 16 10 5.36 0.00
 18 16 11 -0.85 0.00
 18 16 12 5.29 0.00
 18 18 0 2.71 0.00
 18 18 1 -1.98 0.00
 18 18 2 -2.97 0.00
 18 18 3 -3.33 0.00
 18 18 4 0.15 0.00
 18 18 5 -4.63 0.00
 18 18 6 -3.30 0.00
 18 18 7 0.67 0.00
 18 18 8 -2.20 0.00
 18 18 9 -0.89 0.00
 18 18 10 1.18 0.00
 18 18 11 3.95 0.00
 18 20 0 -0.43 0.00
 18 20 1 1.10 0.00
 18 20 2 9.81 0.00
 18 20 3 3.42 0.00
 18 20 4 5.50 0.00
 18 20 5 0.07 0.00
 18 20 6 -1.12 0.00
 18 20 7 1.03 0.00
 18 20 8 -2.94 0.00
 18 20 9 -3.90 0.00
 18 20 10 -0.12 0.00
 18 20 11 0.73 0.00
 18 22 0 -2.52 0.00
 18 22 1 1.93 0.00
 18 22 2 8.71 0.00
 18 22 3 10.44 0.00
 18 22 4 1.54 0.00
 18 22 5 1.72 0.00
 18 22 6 -0.35 0.00
 18 22 7 2.72 0.00
 18 22 8 1.00 0.00
 18 22 9 1.23 0.00
 18 22 10 -3.95 0.00
 18 24 0 -5.50 0.00
 18 24 1 -1.22 0.00
 18 24 2 1.65 0.00
 18 24 3 -4.04 0.00
 18 24 4 -1.43 0.00
 18 24 5 3.73 0.00
 18 24 6 1.90 0.00
 18 24 7 -0.67 0.00
 18 24 8 0.23 0.00
 18 24 9 -1.21 0.00
 18 26 0 -4.89 0.00
 18 26 1 -0.43 0.00
 18 26 2 -1.31 0.00
 18 26 3 -0.73 0.00
 18 26 4 -1.82 0.00
 18 26 5 -0.74 0.00
 18 26 6 -2.05 0.00
 18 26 7 -0.37 0.00
 18 26 8 0.77 0.00
 18 28 0 -1.33 0.00
 18 28 1 -2.96 0.00
 18 28 2 -0.25 0.00
 18 28 3 -2.78 0.00
 18 28 4 -4.50 0.00
 18 28 5 4.45 0.00
 18 28 6 -1.93 0.00
 18 28 7 -1.34 0.00
 18 30 0 -0.79 0.00
 18 30 1 -1.83 0.00
 18 30 2 -0.06 0.00
 18 30 3 0.28 0.00
 18 30 4 -2.17 0.00
 18 30 5 0.46 0.00
 18 30 6 0.70 0.00
 18 32 0 1.44 0.00
 18 32 1 -2.22 0.00
 18 32 2 2.43 0.00
 18 32 3 -3.99 0.00
 18 32 4 0.64 0.00
 19 1 0 -1.80 0.00
 19 1 1 -8.90 0.00
 19 1 2 -4.19 0.00
 19 1 3 2.19 0.00
 19 1 4 1.57 0.00
 19 1 5 -1.05 0.00
 19 1 6 -4.38 0.00
 19 1 7 -2.82 0.00
 19 1 8 5.45 0.00
 19 1 9 4.36 0.00
 19 1 10 5.96 0.00
 19 1 11 -1.36 0.00
 19 1 12 -2.10 0.00
 19 3 0 -0.05 0.00
 19 3 1 -5.14 0.00
 19 3 2 -0.15 0.00
 19 3 3 1.05 0.00
 19 3 4 8.97 0.00
 19 3 5 -5.56 0.00
 19 3 6 -1.62 0.00
 19 3 7 1.23 0.00
 19 3 8 -0.68 0.00
 19 3 9 3.49 0.00
 19 3 10 0.66 0.00
 19 3 11 -1.49 0.00
 19 3 12 -2.18 0.00
 19 5 0 -3.86 0.00
 19 5 1 -1.19 0.00
 19 5 2 0.95 0.00
 19 5 3 3.41 0.00
 19 5 4 -2.03 0.00
 19 5 5 -0.45 0.00
 19 5 6 -0.07 0.00
 19 5 7 -4.85 0.00
 19 5 8 -0.64 0.00
 19 5 9 0.41 0.00
 19 5 10 2.51 0.00
 19 5 11 5.23 0.00
 19 5 12 -0.37 0.00
 19 7 0 -4.92 0.00
 19 7 1 1.06 0.00
 19 7 2 -1.97 0.00
 19 7 3 -3.91 0.00
 19 7 4 -4.36 0.00
 19 7 5 -5.76 0.00
 19 7 6 -1.44 0.00
 19 7 7 4.64 0.00
 19 7 8 -5.30 0.00
 19 7 9 -1.74 0.00
 19 7 10 2.57 0.00
 19 7 11 2.53 0.00
 19 7 12 0.37 0.00
 19 9 0 -11.63 0.00
 19 9 1 -0.01 0.00
 19 9 2 -3.93 0.00
 19 9 3 -5.25 0.00
 19 9 4 -13.64 0.00
 19 9 5 1.77 0.00
 19 9 6 0.14 0.00
 19 9 7 1.58 0.00
 19 9 8 -2.54 0.00
 19 9 9 0.33 0.00
 19 9 10 2.78 0.00
 19 9 11 2.65 0.00
 19 9 12 -1.08 0.00
 19 11 0 -3.01 0.00
 19 11 1 6.46 0.00
 19 11 2 1.51 0.00
 19 11 3 0.18 0.00
 19 11 4 -1.93 0.00
 19 11 5 2.71 0.00
 19 11 6 0.44 0.00
 19 11 7 3.42 0.00
 19 11 8 -0.94 0.00
 19 11 9 0.04 0.00
 19 11 10 -2.42 0.00
 19 11 11 -0.11 0.00
 19 11 12 -3.82 0.00
 19 13 0 4.66 0.00
 19 13 1 1.62 0.00
 19 13 2 10.70 0.00
 19 13 3 1.41 0.00
 19 13 4 2.24 0.00
 19 13 5 1.34 0.00
 19 13 6 3.61 0.00
 19 13 7 0.81 0.00
 19 13 8 1.59 0.00
 19 13 9 1.92 0.00
 19 13 10 0.15 0.00
 19 13 11 0.42 0.00
 19 15 0 4.68 0.00
 19 15 1 -3.63 0.00
 19 15 2 -1.63 0.00
 19 15 3 -0.85 0.00
 19 15 4 -0.60 0.00
 19 15 5 0.06 0.00
 19 15 6 -3.64 0.00
 19 15 7 3.13 0.00
 19 15 8 3.83 0.00
 19 15 9 -3.50 0.00
 19 15 10 1.47 0.00
 19 15 11 -1.75 0.00
 19 17 0 2.19 0.00
 19 17 1 -12.26 0.00
 19 17 2 -7.03 0.00
 19 17 3 -4.77 0.00
 19 17 4 0.67 0.00
 19 17 5 -2.09 0.00
 19 17 6 -0.25 0.00
 19 17 7 -0.42 0.00
 19 17 8 3.21 0.00
 19 17 9 -5.42 0.00
 19 17 10 -0.65 0.00
 19 19 0 6.88 0.00
 19 19 1 -5.92 0.00
 19 19 2 3.06 0.00
 19 19 3 -2.96 0.00
 19 19 4 5.08 0.00
 19 19 5 -0.87 0.00
 19 19 6 -0.26 0.00
 19 19 7 0.78 0.00
 19 19 8 3.77 0.00
 19 19 9 -5.21 0.00
 19 19 10 0.83 0.00
 19 21 0 1.34 0.00
 19 21 1 -3.02 0.00
 19 21 2 6.61 0.00
 19 21 3 4.99 0.00
 19 21 4 5.17 0.00
 19 21 5 -1.79 0.00
 19 21 6 -2.86 0.00
 19 21 7 0.92 0.00
 19 21 8 0.76 0.00
 19 21 9 -4.19 0.00
 19 23 0 -5.57 0.00
 19 23 1 6.26 0.00
 19 23 2 4.05 0.00
 19 23 3 1.70 0.00
 19 23 4 -1.25 0.00
 19 23 5 1.39 0.00
 19 23 6 -1.38 0.00
 19 23 7 -5.33 0.00
 19 23 8 -0.56 0.00
 19 25 0 0.09 0.00
 19 25 1 1.89 0.00
 19 25 2 -3.31 0.00
 19 25 3 0.99 0.00
 19 25 4 -3.31 0.00
 19 25 5 0.00 0.00
 19 25 6 -4.08 0.00
 19 25 7 0.21 0.00
 19 27 0 -0.71 0.00
 19 27 1 2.29 0.00
 19 27 2 -1.14 0.00
 19 27 3 -3.01 0.00
 19 27 4 -1.58 0.00
 19 27 5 6.70 0.00
 19 27 6 0.07 0.00
 19 29 0 3.79 0.00
 19 29 1 1.30 0.00
 19 29 2 4.46 0.00
 19 29 3 -5.49 0.00
 19 29 4 2.26 0.00
 19 29 5 0.03 0.00
 20 0 0 1.42 0.00
 20 0 1 4.42 0.00
 20 0 2 -7.39 0.00
 20 0 3 0.33 0.00
 20 0 4 1.31 0.00
 20 0 5 0.86 0.00
 20 0 6 5.78 0.00
 20 0 7 1.68 0.00
 20 0 8 0.21 0.00
 20 0 9 7.88 0.00
 20 0 10 4.80 0.00
 20 2 0 4.34 0.00
 20 2 1 0.32 0.00
 20 2 2 -3.02 0.00
 20 2 3 -2.45 0.00
 20 2 4 2.64 0.00
 20 2 5 2.02 0.00
 20 2 6 -0.81 0.00
 20 2 7 3.10 0.00
 20 2 8 -5.72 0.00
 20 2 9 -4.40 0.00
 20 2 10 -0.64 0.00
 20 2 11 4.33 0.00
 20 4 0 3.62 0.00
 20 4 1 0.54 0.00
 20 4 2 1.09 0.00
 20 4 3 4.37 0.00
 20 4 4 -3.01 0.00
 20 4 5 3.52 0.00
 20 4 6 -3.55 0.00
 20 4 7 3.57 0.00
 20 4 8 -5.04 0.00
 20 4 9 -4.68 0.00
 20 4 10 3.20 0.00
 20 4 11 -3.76 0.00
 20 6 0 -1.45 0.00
 20 6 1 -2.97 0.00
 20 6 2 1.11 0.00
 20 6 3 -7.08 0.00
 20 6 4 -3.13 0.00
 20 6 5 -5.20 0.00
 20 6 6 -1.36 0.00
 20 6 7 -2.49 0.00
 20 6 8 -1.72 0.00
 20 6 9 -5.00 0.00
 20 6 10 7.22 0.00
 20 6 11 -1.39 0.00
 20 8 0 -7.46 0.00
 20 8 1 0.26 0.00
 20 8 2 2.09 0.00
 20 8 3 -2.54 0.00
 20 8 4 -2.93 0.00
 20 8 5 -9.11 0.00
 20 8 6 -0.49 0.00
 20 8 7 -1.66 0.00
 20 8 8 -2.58 0.00
 20 8 9 0.42 0.00
 20 8 10 3.24 0.00
 20 8 11 -0.02 0.00
 20 10 0 -1.24 0.00
 20 10 1 -0.18 0.00
 20 10 2 2.36 0.00
 20 10 3 -0.84 0.00
 20 10 4 3.55 0.00
 20 10 5 0.60 0.00
 20 10 6 2.29 0.00
 20 10 7 -0.19 0.00
 20 10 8 -1.75 0.00
 20 10 9 1.47 0.00
 20 10 10 0.22 0.00
 20 10 11 3.22 0.00
 20 12 0 -0.10 0.00
 20 12 1 -2.80 0.00
 20 12 2 4.17 0.00
 20 12 3 2.15 0.00
 20 12 4 2.86 0.00
 20 12 5 -4.68 0.00
 20 12 6 -6.03 0.00
 20 12 7 3.92 0.00
 20 12 8 -3.63 0.00
 20 12 9 3.18 0.00
 20 12 10 -0.09 0.00
 20 14 0 9.32 0.00
 20 14 1 -5.44 0.00
 20 14 2 1.94 0.00
 20 14 3 -0.93 0.00
 20 14 4 4.73 0.00
 20 14 5 -5.10 0.00
 20 14 6 -3.09 0.00
 20 14 7 2.65 0.00
 20 14 8 -0.07 0.00
 20 14 9 0.89 0.00
 20 14 10 -2.49 0.00
 20 16 0 -1.47 0.00
 20 16 1 -1.80 0.00
 20 16 2 -9.22 0.00
 20 16 3 2.52 0.00
 20 16 4 3.30 0.00
 20 16 5 -1.26 0.00
 20 16 6 1.19 0.00
 20 16 7 1.99 0.00
 20 16 8 3.17 0.00
 20 16 9 -7.85 0.00
 20 18 0 -2.05 0.00
 20 18 1 1.01 0.00
 20 18 2 -13.68 0.00
 20 18 3 2.14 0.00
 20 18 4 3.53 0.00
 20 18 5 0.88 0.00
 20 18 6 0.75 0.00
 20 18 7 4.32 0.00
 20 18 8 -0.41 0.00
 20 18 9 -0.06 0.00
 20 20 0 0.84 0.00
 20 20 1 -6.74 0.00
 20 20 2 -6.34 0.00
 20 20 3 1.40 0.00
 20 20 4 -1.23 0.00
 20 20 5 0.60 0.00
 20 20 6 3.59 0.00
 20 20 7 1.77 0.00
 20 20 8 1.72 0.00
 20 22 0 -1.16 0.00
 20 22 1 -1.38 0.00
 20 22 2 -2.60 0.00
 20 22 3 3.37 0.00
 20 22 4 -3.01 0.00
 20 22 5 -3.98 0.00
 20 22 6 -3.73 0.00
 20 22 7 -0.46 0.00
 20 24 0 4.68 0.00
 20 24 1 -1.47 0.00
 20 24 2 1.87 0.00
 20 24 3 -6.00 0.00
 20 24 4 -1.39 0.00
 20 24 5 -1.11 0.00
 20 24 6 0.29 0.00
 20 26 0 6.97 0.00
 20 26 1 3.18 0.00
 20 26 2 3.51 0.00
 20 26 3 -1.17 0.00
 20 26 4 6.62 0.00
 20 28 0 4.57 0.00
 20 28 1 0.36 0.00
 20 28 2 2.43 0.00
 21 1 0 5.26 0.00
 21 1 1 6.87 0.00
 21 1 2 -7.81 0.00
 21 1 3 -2.41 0.00
 21 1 4 -1.82 0.00
 21 1 5 2.20 0.00
 21 1 6 -1.91 0.00
 21 1 7 1.65 0.00
 21 1 8 3.21 0.00
 21 1 9 3.69 0.00
 21 3 0 1.57 0.00
 21 3 1 5.55 0.00
 21 3 2 -4.75 0.00
 21 3 3 -0.27 0.00
 21 3 4 2.34 0.00
 21 3 5 0.32 0.00
 21 3 6 -1.72 0.00
 21 3 7 7.40 0.00
 21 3 8 -4.28 0.00
 21 3 9 4.83 0.00
 21 5 0 0.44 0.00
 21 5 1 1.68 0.00
 21 5 2 -1.47 0.00
 21 5 3 2.09 0.00
 21 5 4 -4.08 0.00
 21 5 5 -1.15 0.00
 21 5 6 3.89 0.00
 21 5 7 -1.25 0.00
 21 5 8 -0.38 0.00
 21 5 9 -1.41 0.00
 21 7 0 4.20 0.00
 21 7 1 -0.50 0.00
 21 7 2 4.69 0.00
 21 7 3 -0.45 0.00
 21 7 4 -0.39 0.00
 21 7 5 -4.73 0.00
 21 7 6 1.15 0.00
 21 7 7 -0.87 0.00
 21 7 8 0.52 0.00
 21 7 9 -6.39 0.00
 21 9 0 2.98 0.00
 21 9 1 -6.69 0.00
 21 9 2 6.15 0.00
 21 9 3 0.31 0.00
 21 9 4 -4.76 0.00
 21 9 5 -3.71 0.00
 21 9 6 5.07 0.00
 21 9 7 -6.52 0.00
 21 9 8 0.86 0.00
 21 9 9 -9.98 0.00
 21 11 0 1.01 0.00
 21 11 1 -2.76 0.00
 21 11 2 2.96 0.00
 21 11 3 -0.26 0.00
 21 11 4 -1.48 0.00
 21 11 5 -0.69 0.00
 21 11 6 -0.43 0.00
 21 11 7 -6.23 0.00
 21 11 8 4.46 0.00
 21 11 9 -3.36 0.00
 21 13 0 1.07 0.00
 21 13 1 -2.51 0.00
 21 13 2 -0.38 0.00
 21 13 3 1.39 0.00
 21 13 4 -2.71 0.00
 21 13 5 -7.01 0.00
 21 13 6 0.51 0.00
 21 13 7 0.12 0.00
 21 13 8 1.93 0.00
 21 13 9 7.62 0.00
 21 15 0 -3.49 0.00
 21 15 1 5.83 0.00
 21 15 2 -7.15 0.00
 21 15 3 2.73 0.00
 21 15 4 -5.05 0.00
 21 15 5 -0.19 0.00
 21 15 6 -7.78 0.00
 21 15 7 2.22 0.00
 21 15 8 0.73 0.00
 21 17 0 -1.06 0.00
 21 17 1 1.99 0.00
 21 17 2 -15.17 0.00
 21 17 3 4.11 0.00
 21 17 4 1.86 0.00
 21 17 5 -2.35 0.00
 21 17 6 -1.41 0.00
 21 17 7 1.70 0.00
 21 19 0 -3.43 0.00
 21 19 1 6.26 0.00
 21 19 2 -3.31 0.00
 21 19 3 -3.00 0.00
 21 19 4 1.59 0.00
 21 19 5 2.02 0.00
 21 19 6 -1.06 0.00
 21 19 7 1.41 0.00
 21 21 0 0.40 0.00
 21 21 1 0.89 0.00
 21 21 2 -3.02 0.00
 21 21 3 0.59 0.00
 21 21 4 2.07 0.00
 21 21 5 -3.78 0.00
 21 23 0 -4.13 0.00
 21 23 1 0.60 0.00
 21 23 2 5.68 0.00
 21 23 3 -4.99 0.00
 21 23 4 -0.05 0.00
 21 25 0 5.91 0.00
 21 25 1 -3.43 0.00
 21 25 2 2.86 0.00
 22 0 0 5.28 0.00
 22 0 1 -5.28 0.00
 22 0 2 -1.23 0.00
 22 0 3 -0.04 0.00
 22 0 4 3.68 0.00
 22 0 5 -7.55 0.00
 22 2 0 -4.43 0.00
 22 2 1 -1.03 0.00
 22 2 2 2.21 0.00
 22 2 3 -3.07 0.00
 22 2 4 2.45 0.00
 22 2 5 0.31 0.00
 22 2 6 -1.57 0.00
 22 2 7 -4.73 0.00
 22 4 0 -3.59 0.00
 22 4 1 -1.65 0.00
 22 4 2 0.14 0.00
 22 4 3 6.11 0.00
 22 4 4 -0.41 0.00
 22 4 5 2.89 0.00
 22 4 6 1.76 0.00
 22 4 7 3.06 0.00
 22 6 0 -2.86 0.00
 22 6 1 -1.52 0.00
 22 6 2 6.00 0.00
 22 6 3 -6.62 0.00
 22 6 4 -3.38 0.00
 22 6 5 4.43 0.00
 22 6 6 -0.50 0.00
 22 6 7 0.38 0.00
 22 6 8 2.88 0.00
 22 8 0 -0.75 0.00
 22 8 1 0.83 0.00
 22 8 2 6.27 0.00
 22 8 3 -2.11 0.00
 22 8 4 -5.54 0.00
 22 8 5 0.72 0.00
 22 8 6 -2.30 0.00
 22 8 7 2.11 0.00
 22 10 0 -2.14 0.00
 22 10 1 -0.35 0.00
 22 10 2 4.74 0.00
 22 10 3 -8.72 0.00
 22 10 4 -2.70 0.00
 22 10 5 4.34 0.00
 22 10 6 0.67 0.00
 22 10 7 -1.91 0.00
 22 12 0 -0.49 0.00
 22 12 1 6.25 0.00
 22 12 2 0.94 0.00
 22 12 3 -2.18 0.00
 22 12 4 -4.32 0.00
 22 12 5 -1.48 0.00
 22 12 6 1.89 0.00
 22 12 7 -1.36 0.00
 22 14 0 0.50 0.00
 22 14 1 2.20 0.00
 22 14 2 3.86 0.00
 22 14 3 -5.32 0.00
 22 14 4 -0.15 0.00
 22 14 5 -3.13 0.00
 22 14 6 1.33 0.00
 22 16 0 -0.59 0.00
 22 16 1 0.08 0.00
 22 16 2 -3.60 0.00
 22 16 3 -1.36 0.00
 22 16 4 -3.99 0.00
 22 16 5 -1.41 0.00
 22 16 6 -2.46 0.00
 22 18 0 0.60 0.00
 22 18 1 0.48 0.00
 22 18 2 -0.12 0.00
 22 18 3 -2.83 0.00
 22 18 4 0.56 0.00
 22 18 5 -0.26 0.00
 22 20 0 9.33 0.00
 22 20 1 -0.81 0.00
 22 20 2 4.85 0.00
 22 20 3 1.25 0.00
 22 22 0 1.16 0.00
 23 1 1 -1.01 0.00
 23 3 0 -6.68 0.00
 23 3 1 -3.89 0.00
 23 3 2 0.20 0.00
 23 3 3 2.47 0.00
 23 3 4 2.24 0.00
 23 3 5 -2.87 0.00
 23 5 0 -10.85 0.00
 23 5 1 1.93 0.00
 23 5 2 -2.56 0.00
 23 5 3 1.09 0.00
 23 5 4 -3.15 0.00
 23 5 5 -3.38 0.00
 23 7 0 -8.09 0.00
 23 7 1 4.15 0.00
 23 7 2 -1.82 0.00
 23 7 3 -0.35 0.00
 23 7 4 -3.85 0.00
 23 7 5 -0.72 0.00
 23 9 0 -3.95 0.00
 23 9 1 5.52 0.00
 23 9 2 2.78 0.00
 23 9 3 1.85 0.00
 23 9 4 -4.42 0.00
 23 9 5 2.19 0.00
 23 11 0 -3.91 0.00
 23 11 1 5.64 0.00
 23 11 2 -0.17 0.00
 23 11 3 -0.57 0.00
 23 11 4 -2.88 0.00
 23 13 0 -1.33 0.00
 23 13 1 1.42 0.00
 23 13 2 -1.44 0.00
 23 13 3 -0.21 0.00
 23 13 4 -1.58 0.00
 23 15 0 2.95 0.00
 23 15 1 -1.45 0.00
 23 15 2 3.90 0.00
 23 15 3 -0.63 0.00
 1 1 0 340.25 0.00
 23 1 0 4.64 0.00
 0 2 0 605.39 0.00
 0 4 0 309.21 0.00
 1 5 0 41.05 0.00
 0 6 0 -147.52 0.00
 0 8 0 -51.54 0.00
 0 10 0 27.41 0.00
 23 17 0 12.27 0.00
 23 19 0 4.26 0.00
 23 21 0 7.49 0.00
 23 23 0 -0.76 0.00
 22 24 0 -1.56 0.00
 23 25 0 1.09 0.00
 22 26 0 -10.02 0.00
 21 27 0 -10.28 0.00
 23 27 0 -14.80 0.00
 22 28 0 -14.84 0.00
 21 29 0 -7.03 0.00
 23 29 0 -15.96 0.00
 20 30 0 2.16 0.00
 22 30 0 -15.48 0.00
 19 31 0 2.28 0.00
 21 31 0 5.93 0.00
 20 32 0 12.35 0.00
 22 32 0 0.84 0.00
 19 33 0 -0.80 0.00
 21 33 0 11.92 0.00
 18 34 0 3.74 0.00
 20 34 0 9.98 0.00
 17 35 0 4.72 0.00
 19 35 0 0.66 0.00
 21 35 0 6.63 0.00
 6 36 0 9.03 0.00
 18 36 0 -8.04 0.00
 20 36 0 1.94 0.00
 7 37 0 -6.68 0.00
 17 37 0 6.49 0.00
 19 37 0 2.53 0.00
 16 38 0 -1.34 0.00
 18 38 0 -4.88 0.00
 20 38 0 0.90 0.00
 15 39 0 3.65 0.00
 17 39 0 1.45 0.00
 19 39 0 5.11 0.00
 16 40 0 1.37 0.00
 18 40 0 -5.28 0.00
 15 41 0 1.96 0.00
 17 41 0 -13.89 0.00
 14 42 0 -1.06 0.00
 16 42 0 2.52 0.00
 18 42 0 -0.19 0.00
 13 43 0 0.89 0.00
 15 43 0 3.70 0.00
 17 43 0 -8.22 0.00
 12 44 0 1.08 0.00
 14 44 0 -2.64 0.00
 16 44 0 1.35 0.00
 11 45 0 -1.28 0.00
 13 45 0 -2.18 0.00
 15 45 0 1.61 0.00
 0 46 0 -10.34 0.00
 10 46 0 -5.91 0.00
 12 46 0 0.12 0.00
 14 46 0 -5.71 0.00
 1 47 0 10.98 0.00
 9 47 0 6.36 0.00
 11 47 0 5.07 0.00
 13 47 0 6.66 0.00
 0 48 0 0.59 0.00
 2 48 0 -0.15 0.00
 4 48 0 -4.57 0.00
 6 48 0 -13.08 0.00
 8 48 0 -13.82 0.00
 10 48 0 -8.37 0.00
 12 48 0 4.11 0.00
 0 0 1 156.19 0.00
 0 2 1 209.99 0.00
 23 17 1 -10.09 0.00
 23 19 1 -4.47 0.00
 23 21 1 3.92 0.00
 22 22 1 10.20 0.00
 23 23 1 6.23 0.00
 22 24 1 1.95 0.00
 23 25 1 3.43 0.00
 22 26 1 -8.41 0.00
 21 27 1 -4.21 0.00
 23 27 1 -4.84 0.00
 22 28 1 -14.48 0.00
 21 29 1 -1.94 0.00
 23 29 1 -5.69 0.00
 20 30 1 7.31 0.00
 22 30 1 -12.45 0.00
 19 31 1 4.40 0.00
 21 31 1 -2.35 0.00
 20 32 1 16.48 0.00
 22 32 1 -1.51 0.00
 19 33 1 13.96 0.00
 21 33 1 3.82 0.00
 18 34 1 -6.01 0.00
 20 34 1 3.39 0.00
 17 35 1 -12.03 0.00
 19 35 1 2.53 0.00
 21 35 1 1.80 0.00
 18 36 1 2.97 0.00
 20 36 1 0.88 0.00
 17 37 1 -5.81 0.00
 19 37 1 -1.37 0.00
 16 38 1 3.38 0.00
 18 38 1 8.49 0.00
 20 38 1 3.37 0.00
 15 39 1 -5.45 0.00
 17 39 1 -4.24 0.00
 19 39 1 -4.36 0.00
 16 40 1 -4.87 0.00
 18 40 1 -5.48 0.00
 15 41 1 1.12 0.00
 17 41 1 5.69 0.00
 14 42 1 -1.05 0.00
 16 42 1 -1.61 0.00
 18 42 1 -2.36 0.00
 13 43 1 -3.68 0.00
 15 43 1 0.47 0.00
 17 43 1 0.43 0.00
 12 44 1 2.33 0.00
 14 44 1 7.18 0.00
 16 44 1 -0.86 0.00
 11 45 1 -2.55 0.00
 13 45 1 -3.09 0.00
 15 45 1 -0.57 0.00
 10 46 1 -1.23 0.00
 12 46 1 -2.88 0.00
 14 46 1 -0.10 0.00
 9 47 1 -6.78 0.00
 11 47 1 -4.36 0.00
 13 47 1 0.43 0.00
 0 48 1 3.96 0.00
 6 48 1 2.90 0.00
 8 48 1 -0.44 0.00
 10 48 1 2.84 0.00
 12 48 1 2.93 0.00
 23 1 2 6.13 0.00
 23 17 2 0.84 0.00
 23 19 2 5.53 0.00
 23 21 2 1.02 0.00
 22 22 2 4.71 0.00
 23 23 2 5.47 0.00
 22 24 2 6.16 0.00
 23 25 2 1.38 0.00
 22 26 2 1.40 0.00
 21 27 2 -3.86 0.00
 23 27 2 -3.77 0.00
 22 28 2 1.56 0.00
 21 29 2 -3.96 0.00
 23 29 2 -4.88 0.00
 20 30 2 -4.67 0.00
 22 30 2 -4.46 0.00
 19 31 2 -1.53 0.00
 21 31 2 2.19 0.00
 20 32 2 2.59 0.00
 22 32 2 3.70 0.00
 19 33 2 -3.59 0.00
 21 33 2 5.68 0.00
 18 34 2 1.45 0.00
 20 34 2 -1.27 0.00
 17 35 2 0.20 0.00
 19 35 2 -3.11 0.00
 21 35 2 2.30 0.00
 18 36 2 0.67 0.00
 20 36 2 0.63 0.00
 17 37 2 3.25 0.00
 19 37 2 -2.52 0.00
 16 38 2 -3.68 0.00
 18 38 2 -3.55 0.00
 20 38 2 -1.04 0.00
 15 39 2 3.13 0.00
 17 39 2 -0.59 0.00
 19 39 2 1.76 0.00
 16 40 2 4.28 0.00
 18 40 2 -1.22 0.00
 15 41 2 8.11 0.00
 17 41 2 -6.85 0.00
 14 42 2 -1.71 0.00
 16 42 2 3.34 0.00
 13 43 2 -2.90 0.00
 15 43 2 4.91 0.00
 17 43 2 -5.20 0.00
 12 44 2 1.32 0.00
 14 44 2 -4.38 0.00
 16 44 2 0.03 0.00
 11 45 2 -1.30 0.00
 13 45 2 -5.51 0.00
 15 45 2 0.94 0.00
 10 46 2 -11.30 0.00
 12 46 2 -0.88 0.00
 14 46 2 -4.85 0.00
 7 47 2 -7.44 0.00
 9 47 2 -0.38 0.00
 11 47 2 -1.85 0.00
 13 47 2 1.85 0.00
 0 48 2 -7.53 0.00
 6 48 2 -10.84 0.00
 8 48 2 -5.64 0.00
 10 48 2 -6.33 0.00
 12 48 2 4.62 0.00
 23 1 3 6.43 0.00
 23 17 3 0.13 0.00
 23 19 3 -3.90 0.00
 23 21 3 3.84 0.00
 22 22 3 6.40 0.00
 23 23 3 2.35 0.00
 22 24 3 3.80 0.00
 21 25 3 1.38 0.00
 23 25 3 5.18 0.00
 22 26 3 2.63 0.00
 21 27 3 4.66 0.00
 23 27 3 5.25 0.00
 20 28 3 -5.53 0.00
 22 28 3 1.04 0.00
 21 29 3 4.19 0.00
 23 29 3 1.26 0.00
 20 30 3 -1.07 0.00
 22 30 3 -2.21 0.00
 19 31 3 -7.42 0.00
 21 31 3 0.31 0.00
 20 32 3 4.27 0.00
 22 32 3 -0.19 0.00
 19 33 3 1.52 0.00
 21 33 3 -0.82 0.00
 18 34 3 -5.78 0.00
 20 34 3 -3.29 0.00
 17 35 3 -2.67 0.00
 19 35 3 2.60 0.00
 21 35 3 -2.07 0.00
 18 36 3 1.54 0.00
 20 36 3 -1.59 0.00
 17 37 3 -2.64 0.00
 19 37 3 2.26 0.00
 16 38 3 -0.17 0.00
 18 38 3 -0.11 0.00
 15 39 3 0.51 0.00
 17 39 3 1.05 0.00
 19 39 3 3.23 0.00
 14 40 3 1.08 0.00
 16 40 3 4.40 0.00
 18 40 3 -2.53 0.00
 15 41 3 -0.74 0.00
 17 41 3 -2.07 0.00
 14 42 3 0.10 0.00
 16 42 3 5.28 0.00
 13 43 3 -0.62 0.00
 15 43 3 4.26 0.00
 17 43 3 -0.61 0.00
 12 44 3 0.62 0.00
 14 44 3 2.55 0.00
 16 44 3 1.18 0.00
 11 45 3 -4.01 0.00
 13 45 3 -1.87 0.00
 15 45 3 -1.88 0.00
 10 46 3 0.22 0.00
 12 46 3 -1.82 0.00
 14 46 3 -2.70 0.00
 7 47 3 -1.52 0.00
 9 47 3 0.07 0.00
 11 47 3 -1.43 0.00
 13 47 3 3.62 0.00
 0 48 3 -4.99 0.00
 4 48 3 -1.58 0.00
 6 48 3 1.41 0.00
 8 48 3 -1.49 0.00
 10 48 3 1.78 0.00
 12 48 3 3.12 0.00
 0 0 4 101.45 0.00
 23 1 4 4.59 0.00
 23 15 4 0.82 0.00
 23 17 4 8.14 0.00
 23 19 4 0.79 0.00
 22 20 4 -2.53 0.00
 23 21 4 -0.50 0.00
 22 22 4 -3.38 0.00
 23 23 4 -4.36 0.00
 22 24 4 -1.50 0.00
 21 25 4 6.44 0.00
 23 25 4 2.85 0.00
 22 26 4 4.85 0.00
 21 27 4 -1.41 0.00
 23 27 4 2.84 0.00
 20 28 4 2.30 0.00
 22 28 4 5.18 0.00
 21 29 4 -5.22 0.00
 23 29 4 1.43 0.00
 20 30 4 -3.84 0.00
 22 30 4 2.18 0.00
 19 31 4 -1.50 0.00
 21 31 4 -4.51 0.00
 20 32 4 -2.20 0.00
 22 32 4 6.20 0.00
 19 33 4 -2.99 0.00
 21 33 4 2.04 0.00
 18 34 4 1.45 0.00
 20 34 4 -5.57 0.00
 17 35 4 3.94 0.00
 19 35 4 -1.06 0.00
 18 36 4 6.61 0.00
 20 36 4 2.40 0.00
 17 37 4 -1.04 0.00
 19 37 4 -7.82 0.00
 16 38 4 -2.25 0.00
 18 38 4 1.68 0.00
 15 39 4 -0.11 0.00
 17 39 4 4.78 0.00
 19 39 4 -1.23 0.00
 14 40 4 -1.23 0.00
 16 40 4 -2.73 0.00
 18 40 4 -1.71 0.00
 13 41 4 4.38 0.00
 15 41 4 1.19 0.00
 17 41 4 1.89 0.00
 12 42 4 -1.21 0.00
 14 42 4 0.48 0.00
 16 42 4 -0.11 0.00
 11 43 4 -1.30 0.00
 13 43 4 0.38 0.00
 15 43 4 -1.21 0.00
 12 44 4 -4.53 0.00
 14 44 4 -2.80 0.00
 16 44 4 -3.24 0.00
 9 45 4 5.94 0.00
 11 45 4 -0.75 0.00
 13 45 4 -0.77 0.00
 15 45 4 -0.72 0.00
 8 46 4 7.98 0.00
 10 46 4 1.90 0.00
 12 46 4 3.48 0.00
 14 46 4 4.53 0.00
 7 47 4 1.32 0.00
 9 47 4 8.62 0.00
 11 47 4 2.20 0.00
 13 47 4 3.86 0.00
 0 48 4 -3.46 0.00
 2 48 4 -9.03 0.00
 4 48 4 -0.82 0.00
 6 48 4 -4.42 0.00
 8 48 4 1.71 0.00
 10 48 4 -0.07 0.00
 12 48 4 1.42 0.00
 0 0 5 38.30 0.00
 23 1 5 3.29 0.00
 23 11 5 5.58 0.00
 23 13 5 -2.37 0.00
 23 15 5 2.10 0.00
 23 17 5 -3.74 0.00
 23 19 5 -0.77 0.00
 22 20 5 -0.86 0.00
 23 21 5 -3.94 0.00
 22 22 5 0.88 0.00
 21 23 5 -0.43 0.00
 23 23 5 0.53 0.00
 22 24 5 8.37 0.00
 21 25 5 -2.76 0.00
 23 25 5 -2.05 0.00
 20 26 5 -0.66 0.00
 22 26 5 8.97 0.00
 21 27 5 7.35 0.00
 23 27 5 3.29 0.00
 20 28 5 -2.57 0.00
 22 28 5 2.42 0.00
 21 29 5 2.52 0.00
 20 30 5 -2.12 0.00
 22 30 5 -2.91 0.00
 19 31 5 -1.59 0.00
 21 31 5 5.47 0.00
 18 32 5 1.76 0.00
 20 32 5 5.06 0.00
 19 33 5 -0.43 0.00
 21 33 5 0.51 0.00
 18 34 5 -1.08 0.00
 20 34 5 0.23 0.00
 17 35 5 -3.30 0.00
 19 35 5 0.61 0.00
 16 36 5 -7.12 0.00
 18 36 5 0.40 0.00
 20 36 5 -2.29 0.00
 17 37 5 0.21 0.00
 19 37 5 2.27 0.00
 16 38 5 -7.83 0.00
 18 38 5 -0.39 0.00
 15 39 5 -2.68 0.00
 17 39 5 -1.26 0.00
 14 40 5 2.92 0.00
 16 40 5 4.06 0.00
 18 40 5 0.51 0.00
 13 41 5 -6.85 0.00
 15 41 5 -2.85 0.00
 17 41 5 -4.36 0.00
 12 42 5 -1.86 0.00
 14 42 5 -2.88 0.00
 16 42 5 1.51 0.00
 11 43 5 -0.81 0.00
 13 43 5 -2.08 0.00
 15 43 5 2.80 0.00
 10 44 5 -0.90 0.00
 12 44 5 -3.34 0.00
 14 44 5 -0.81 0.00
 9 45 5 -5.65 0.00
 11 45 5 -3.36 0.00
 13 45 5 -2.33 0.00
 15 45 5 -1.05 0.00
 8 46 5 0.51 0.00
 10 46 5 2.16 0.00
 12 46 5 -1.19 0.00
 14 46 5 -1.05 0.00
 5 47 5 -1.36 0.00
 7 47 5 6.74 0.00
 9 47 5 1.68 0.00
 11 47 5 3.36 0.00
 13 47 5 2.15 0.00
 0 48 5 3.15 0.00
 2 48 5 7.85 0.00
 4 48 5 4.18 0.00
 6 48 5 8.23 0.00
 8 48 5 0.28 0.00
 10 48 5 3.94 0.00
 12 48 5 2.05 0.00
 0 0 6 76.79 0.00
 22 0 6 1.80 0.00
 23 1 6 -2.51 0.00
 23 3 6 -1.55 0.00
 23 5 6 4.54 0.00
 23 7 6 0.76 0.00
 23 9 6 4.50 0.00
 23 11 6 0.51 0.00
 23 13 6 1.99 0.00
 23 15 6 -2.69 0.00
 23 17 6 1.61 0.00
 22 18 6 -5.99 0.00
 23 19 6 -0.73 0.00
 22 20 6 1.99 0.00
 21 21 6 -1.49 0.00
 23 21 6 -3.45 0.00
 22 22 6 -6.44 0.00
 21 23 6 7.25 0.00
 23 23 6 2.36 0.00
 22 24 6 -4.44 0.00
 21 25 6 6.66 0.00
 23 25 6 1.51 0.00
 20 26 6 4.94 0.00
 22 26 6 -3.37 0.00
 21 27 6 2.54 0.00
 23 27 6 4.44 0.00
 20 28 6 8.48 0.00
 22 28 6 -2.22 0.00
 19 29 6 5.54 0.00
 21 29 6 -4.73 0.00
 20 30 6 8.60 0.00
 22 30 6 0.67 0.00
 19 31 6 1.32 0.00
 21 31 6 -4.96 0.00
 18 32 6 -5.64 0.00
 20 32 6 0.58 0.00
 17 33 6 -0.38 0.00
 19 33 6 3.69 0.00
 21 33 6 2.99 0.00
 18 34 6 -4.73 0.00
 20 34 6 -1.99 0.00
 17 35 6 -8.95 0.00
 19 35 6 -3.21 0.00
 16 36 6 -2.52 0.00
 18 36 6 -0.44 0.00
 15 37 6 1.88 0.00
 17 37 6 -1.15 0.00
 19 37 6 -1.95 0.00
 14 38 6 2.93 0.00
 16 38 6 2.27 0.00
 18 38 6 3.03 0.00
 13 39 6 -0.77 0.00
 15 39 6 -0.44 0.00
 17 39 6 0.82 0.00
 12 40 6 -4.58 0.00
 14 40 6 -4.85 0.00
 16 40 6 -5.15 0.00
 13 41 6 3.76 0.00
 15 41 6 2.50 0.00
 17 41 6 3.64 0.00
 12 42 6 -1.09 0.00
 14 42 6 0.16 0.00
 16 42 6 -0.28 0.00
 11 43 6 -2.40 0.00
 13 43 6 -2.45 0.00
 15 43 6 -2.75 0.00
 10 44 6 -1.45 0.00
 12 44 6 -0.08 0.00
 14 44 6 1.47 0.00
 9 45 6 -4.10 0.00
 11 45 6 -5.82 0.00
 13 45 6 -4.24 0.00
 6 46 6 -3.58 0.00
 8 46 6 -5.90 0.00
 10 46 6 -8.35 0.00
 12 46 6 -4.44 0.00
 1 47 6 -0.28 0.00
 3 47 6 -3.88 0.00
 5 47 6 -2.16 0.00
 7 47 6 0.31 0.00
 9 47 6 -4.18 0.00
 11 47 6 -3.69 0.00
 0 48 6 -4.70 0.00
 2 48 6 -6.04 0.00
 4 48 6 -1.99 0.00
 6 48 6 -0.95 0.00
 8 48 6 2.11 0.00
 10 48 6 0.85 0.00
 0 0 7 -50.86 0.00
 2 0 7 -7.06 0.00
 22 0 7 -8.37 0.00
 1 1 7 -2.96 0.00
 23 1 7 3.04 0.00
 0 2 7 -13.18 0.00
 23 3 7 2.35 0.00
 23 5 7 -0.21 0.00
 23 7 7 2.80 0.00
 23 9 7 3.45 0.00
 23 11 7 -0.30 0.00
 23 13 7 1.74 0.00
 22 14 7 -0.23 0.00
 23 15 7 1.41 0.00
 22 16 7 -3.42 0.00
 23 17 7 0.03 0.00
 22 18 7 -0.10 0.00
 23 19 7 -4.38 0.00
 22 20 7 -1.64 0.00
 21 21 7 5.70 0.00
 23 21 7 -0.40 0.00
 22 22 7 1.22 0.00
 21 23 7 -7.09 0.00
 23 23 7 -8.25 0.00
 20 24 7 -3.48 0.00
 22 24 7 8.78 0.00
 21 25 7 -2.61 0.00
 23 25 7 -0.63 0.00
 20 26 7 -4.32 0.00
 22 26 7 4.25 0.00
 19 27 7 1.59 0.00
 21 27 7 -5.79 0.00
 20 28 7 -4.65 0.00
 22 28 7 2.14 0.00
 19 29 7 9.54 0.00
 21 29 7 5.43 0.00
 18 30 7 0.04 0.00
 20 30 7 -0.54 0.00
 19 31 7 -3.54 0.00
 21 31 7 -1.47 0.00
 18 32 7 -4.15 0.00
 20 32 7 3.39 0.00
 17 33 7 -3.01 0.00
 19 33 7 -3.34 0.00
 16 34 7 -1.88 0.00
 18 34 7 -7.17 0.00
 20 34 7 -3.56 0.00
 17 35 7 0.01 0.00
 19 35 7 -1.65 0.00
 16 36 7 -3.35 0.00
 18 36 7 2.72 0.00
 15 37 7 -1.52 0.00
 17 37 7 2.57 0.00
 14 38 7 0.40 0.00
 16 38 7 -2.99 0.00
 18 38 7 1.18 0.00
 13 39 7 1.25 0.00
 15 39 7 -0.28 0.00
 17 39 7 2.28 0.00
 12 40 7 4.35 0.00
 14 40 7 1.35 0.00
 16 40 7 6.61 0.00
 11 41 7 -6.49 0.00
 13 41 7 -6.38 0.00
 15 41 7 -2.57 0.00
 10 42 7 -2.45 0.00
 12 42 7 2.54 0.00
 14 42 7 -1.34 0.00
 16 42 7 4.88 0.00
 9 43 7 0.88 0.00
 11 43 7 -0.02 0.00
 13 43 7 2.37 0.00
 15 43 7 5.08 0.00
 8 44 7 5.03 0.00
 10 44 7 -3.95 0.00
 12 44 7 -1.06 0.00
 14 44 7 -1.20 0.00
 7 45 7 0.26 0.00
 9 45 7 -1.00 0.00
 11 45 7 1.75 0.00
 13 45 7 3.41 0.00
 4 46 7 -15.04 0.00
 6 46 7 2.71 0.00
 8 46 7 -2.70 0.00
 10 46 7 -6.47 0.00
 12 46 7 -1.22 0.00
 1 47 7 -9.78 0.00
 3 47 7 -10.62 0.00
 5 47 7 -9.87 0.00
 7 47 7 -2.67 0.00
 9 47 7 -4.56 0.00
 11 47 7 -3.46 0.00
 0 48 7 -5.58 0.00
 2 48 7 0.47 0.00
 4 48 7 -10.64 0.00
 6 48 7 4.59 0.00
 8 48 7 -4.58 0.00
 10 48 7 -3.90 0.00
 0 0 8 5.48 0.00
 2 0 8 -10.52 0.00
 4 0 8 -12.25 0.00
 12 0 8 -4.08 0.00
 22 0 8 10.58 0.00
 1 1 8 -14.73 0.00
 3 1 8 28.66 0.00
 13 1 8 -3.72 0.00
 23 1 8 -0.95 0.00
 0 2 8 -16.87 0.00
 2 2 8 -5.64 0.00
 22 2 8 9.39 0.00
 1 3 8 -20.84 0.00
 23 3 8 -2.69 0.00
 0 4 8 -9.66 0.00
 22 4 8 8.15 0.00
 23 5 8 -0.61 0.00
 23 7 8 -3.87 0.00
 22 8 8 -6.55 0.00
 23 9 8 -8.51 0.00
 22 10 8 -2.61 0.00
 23 11 8 -5.66 0.00
 22 12 8 6.18 0.00
 23 13 8 -4.19 0.00
 22 14 8 10.22 0.00
 23 15 8 -0.53 0.00
 22 16 8 0.54 0.00
 21 17 8 -5.24 0.00
 23 17 8 -0.02 0.00
 22 18 8 -3.91 0.00
 21 19 8 -3.44 0.00
 23 19 8 0.20 0.00
 22 20 8 0.95 0.00
 21 21 8 1.49 0.00
 23 21 8 3.20 0.00
 20 22 8 0.95 0.00
 22 22 8 -3.30 0.00
 21 23 8 3.03 0.00
 23 23 8 0.71 0.00
 20 24 8 -4.11 0.00
 22 24 8 -7.29 0.00
 19 25 8 -5.65 0.00
 21 25 8 2.52 0.00
 20 26 8 1.13 0.00
 22 26 8 -3.73 0.00
 19 27 8 -2.87 0.00
 21 27 8 0.13 0.00
 18 28 8 3.31 0.00
 20 28 8 3.41 0.00
 19 29 8 1.46 0.00
 21 29 8 -4.65 0.00
 18 30 8 2.24 0.00
 20 30 8 0.55 0.00
 17 31 8 -0.30 0.00
 19 31 8 0.17 0.00
 18 32 8 -1.68 0.00
 20 32 8 -3.70 0.00
 17 33 8 -0.47 0.00
 19 33 8 -1.16 0.00
 16 34 8 3.55 0.00
 18 34 8 -0.28 0.00
 15 35 8 -3.05 0.00
 17 35 8 -1.95 0.00
 19 35 8 -0.93 0.00
 14 36 8 0.59 0.00
 16 36 8 5.68 0.00
 18 36 8 2.75 0.00
 13 37 8 -0.10 0.00
 15 37 8 5.23 0.00
 17 37 8 2.74 0.00
 12 38 8 0.01 0.00
 14 38 8 0.44 0.00
 16 38 8 2.50 0.00
 11 39 8 0.15 0.00
 13 39 8 -3.57 0.00
 15 39 8 1.05 0.00
 17 39 8 1.59 0.00
 12 40 8 -10.80 0.00
 14 40 8 -4.40 0.00
 16 40 8 -1.66 0.00
 11 41 8 -0.04 0.00
 13 41 8 5.07 0.00
 15 41 8 0.45 0.00
 10 42 8 0.94 0.00
 12 42 8 -2.19 0.00
 14 42 8 2.18 0.00
 9 43 8 3.99 0.00
 11 43 8 -6.99 0.00
 13 43 8 5.17 0.00
 6 44 8 -3.29 0.00
 8 44 8 -2.86 0.00
 10 44 8 -0.98 0.00
 12 44 8 -0.70 0.00
 14 44 8 3.46 0.00
 5 45 8 3.27 0.00
 7 45 8 12.42 0.00
 9 45 8 8.01 0.00
 11 45 8 -2.67 0.00
 13 45 8 5.91 0.00
 0 46 8 4.42 0.00
 2 46 8 -6.78 0.00
 4 46 8 -3.10 0.00
 6 46 8 -2.58 0.00
 8 46 8 -0.56 0.00
 10 46 8 5.06 0.00
 12 46 8 2.38 0.00
 1 47 8 -10.98 0.00
 3 47 8 -12.02 0.00
 5 47 8 -2.18 0.00
 7 47 8 5.34 0.00
 9 47 8 -0.85 0.00
 11 47 8 -3.93 0.00
 0 48 8 -2.09 0.00
 2 48 8 -10.34 0.00
 4 48 8 1.27 0.00
 6 48 8 1.07 0.00
 8 48 8 1.08 0.00
 10 48 8 4.07 0.00
 0 0 9 -54.60 0.00
 12 0 9 -26.32 0.00
 22 0 9 6.38 0.00
 13 1 9 -21.75 0.00
 23 1 9 3.91 0.00
 12 2 9 -16.61 0.00
 22 2 9 1.09 0.00
 13 3 9 -3.80 0.00
 23 3 9 3.19 0.00
 22 4 9 -0.81 0.00
 23 5 9 -0.81 0.00
 22 6 9 -5.64 0.00
 23 7 9 -0.24 0.00
 22 8 9 -8.59 0.00
 23 9 9 -2.07 0.00
 22 10 9 -14.96 0.00
 23 11 9 1.43 0.00
 22 12 9 -8.28 0.00
 23 13 9 7.15 0.00
 22 14 9 -2.55 0.00
 21 15 9 1.93 0.00
 23 15 9 4.59 0.00
 22 16 9 -4.43 0.00
 21 17 9 -2.43 0.00
 23 17 9 4.19 0.00
 22 18 9 3.39 0.00
 21 19 9 -0.57 0.00
 23 19 9 0.18 0.00
 20 20 9 -2.14 0.00
 22 20 9 1.99 0.00
 21 21 9 5.22 0.00
 23 21 9 2.81 0.00
 20 22 9 -0.15 0.00
 22 22 9 2.42 0.00
 19 23 9 -6.36 0.00
 21 23 9 0.28 0.00
 20 24 9 -3.93 0.00
 22 24 9 5.37 0.00
 19 25 9 -0.08 0.00
 21 25 9 -0.97 0.00
 18 26 9 -1.67 0.00
 20 26 9 -5.04 0.00
 22 26 9 1.24 0.00
 19 27 9 3.13 0.00
 21 27 9 0.79 0.00
 18 28 9 1.09 0.00
 20 28 9 -2.38 0.00
 17 29 9 3.18 0.00
 19 29 9 5.47 0.00
 21 29 9 0.24 0.00
 18 30 9 6.54 0.00
 20 30 9 1.25 0.00
 17 31 9 -2.15 0.00
 19 31 9 -2.96 0.00
 16 32 9 -4.70 0.00
 18 32 9 2.82 0.00
 15 33 9 4.40 0.00
 17 33 9 1.94 0.00
 19 33 9 -0.07 0.00
 12 34 9 -4.91 0.00
 14 34 9 7.93 0.00
 16 34 9 -0.11 0.00
 18 34 9 1.95 0.00
 13 35 9 0.24 0.00
 15 35 9 7.66 0.00
 17 35 9 4.34 0.00
 12 36 9 -10.31 0.00
 14 36 9 6.04 0.00
 16 36 9 -4.55 0.00
 18 36 9 5.34 0.00
 11 37 9 3.18 0.00
 13 37 9 -0.15 0.00
 15 37 9 1.60 0.00
 17 37 9 1.77 0.00
 12 38 9 -1.43 0.00
 14 38 9 4.23 0.00
 16 38 9 -3.55 0.00
 11 39 9 5.79 0.00
 13 39 9 0.96 0.00
 15 39 9 0.96 0.00
 10 40 9 -0.33 0.00
 12 40 9 2.26 0.00
 14 40 9 -0.96 0.00
 9 41 9 -6.84 0.00
 11 41 9 -3.98 0.00
 13 41 9 -9.07 0.00
 15 41 9 -0.34 0.00
 8 42 9 -7.00 0.00
 10 42 9 -3.44 0.00
 12 42 9 0.87 0.00
 14 42 9 -0.10 0.00
 7 43 9 -6.87 0.00
 9 43 9 -9.91 0.00
 11 43 9 1.87 0.00
 13 43 9 -5.15 0.00
 4 44 9 8.01 0.00
 6 44 9 8.05 0.00
 8 44 9 8.08 0.00
 10 44 9 6.87 0.00
 12 44 9 1.50 0.00
 1 45 9 -1.65 0.00
 3 45 9 1.02 0.00
 5 45 9 -6.99 0.00
 7 45 9 -6.92 0.00
 9 45 9 -5.90 0.00
 11 45 9 6.48 0.00
 0 46 9 3.36 0.00
 2 46 9 -0.91 0.00
 4 46 9 1.91 0.00
 6 46 9 8.28 0.00
 8 46 9 6.74 0.00
 10 46 9 3.12 0.00
 1 47 9 -0.63 0.00
 3 47 9 2.93 0.00
 5 47 9 0.49 0.00
 7 47 9 6.99 0.00
 9 47 9 4.13 0.00
 0 48 9 -4.83 0.00
 2 48 9 -4.87 0.00
 4 48 9 -2.28 0.00
 6 48 9 4.62 0.00
 8 48 9 3.43 0.00
 14 0 10 -11.36 0.00
 22 0 10 8.00 0.00
 13 1 10 -11.98 0.00
 21 1 10 4.90 0.00
 23 1 10 5.76 0.00
 14 2 10 -13.45 0.00
 22 2 10 2.03 0.00
 13 3 10 -1.53 0.00
 21 3 10 -15.86 0.00
 23 3 10 -4.78 0.00
 22 4 10 -2.06 0.00
 13 5 10 5.83 0.00
 21 5 10 -12.87 0.00
 23 5 10 4.01 0.00
 22 6 10 -11.64 0.00
 21 7 10 -14.81 0.00
 23 7 10 -6.94 0.00
 22 8 10 -20.15 0.00
 21 9 10 -7.12 0.00
 23 9 10 -6.19 0.00
 22 10 10 -10.95 0.00
 21 11 10 -10.84 0.00
 23 11 10 -13.30 0.00
 22 12 10 8.01 0.00
 21 13 10 -4.06 0.00
 23 13 10 -3.94 0.00
 22 14 10 14.71 0.00
 21 15 10 -4.70 0.00
 23 15 10 -0.80 0.00
 20 16 10 -5.49 0.00
 22 16 10 9.14 0.00
 21 17 10 -4.60 0.00
 23 17 10 1.15 0.00
 20 18 10 -11.57 0.00
 22 18 10 6.82 0.00
 21 19 10 3.04 0.00
 23 19 10 4.73 0.00
 20 20 10 -4.51 0.00
 22 20 10 12.45 0.00
 19 21 10 -1.67 0.00
 21 21 10 4.41 0.00
 20 22 10 -5.63 0.00
 22 22 10 1.63 0.00
 19 23 10 -9.16 0.00
 21 23 10 -1.04 0.00
 18 24 10 -3.69 0.00
 20 24 10 0.18 0.00
 19 25 10 -7.58 0.00
 21 25 10 1.70 0.00
 18 26 10 -4.14 0.00
 20 26 10 1.52 0.00
 17 27 10 -5.70 0.00
 19 27 10 -8.40 0.00
 21 27 10 -1.51 0.00
 18 28 10 -0.42 0.00
 20 28 10 7.85 0.00
 17 29 10 3.02 0.00
 19 29 10 4.35 0.00
 16 30 10 8.23 0.00
 18 30 10 -5.59 0.00
 20 30 10 0.57 0.00
 15 31 10 0.02 0.00
 17 31 10 5.81 0.00
 19 31 10 3.58 0.00
 14 32 10 -15.65 0.00
 16 32 10 0.70 0.00
 18 32 10 -8.07 0.00
 13 33 10 6.66 0.00
 15 33 10 -4.47 0.00
 17 33 10 0.57 0.00
 12 34 10 4.88 0.00
 14 34 10 -3.65 0.00
 16 34 10 7.55 0.00
 18 34 10 -3.21 0.00
 13 35 10 2.05 0.00
 15 35 10 -0.56 0.00
 17 35 10 0.56 0.00
 12 36 10 5.41 0.00
 14 36 10 -1.96 0.00
 16 36 10 5.81 0.00
 11 37 10 -0.06 0.00
 13 37 10 -6.41 0.00
 15 37 10 3.04 0.00
 10 38 10 5.27 0.00
 12 38 10 6.66 0.00
 14 38 10 1.61 0.00
 16 38 10 4.23 0.00
 9 39 10 -6.23 0.00
 11 39 10 9.59 0.00
 13 39 10 -5.71 0.00
 15 39 10 6.38 0.00
 8 40 10 4.32 0.00
 10 40 10 5.07 0.00
 12 40 10 -0.91 0.00
 14 40 10 0.41 0.00
 7 41 10 -5.57 0.00
 9 41 10 -6.07 0.00
 11 41 10 6.84 0.00
 13 41 10 -3.29 0.00
 6 42 10 1.79 0.00
 8 42 10 0.64 0.00
 10 42 10 -0.36 0.00
 12 42 10 -3.08 0.00
 3 43 10 0.13 0.00
 5 43 10 -5.17 0.00
 7 43 10 -6.07 0.00
 9 43 10 -2.63 0.00
 11 43 10 -1.41 0.00
 0 44 10 -4.88 0.00
 2 44 10 1.08 0.00
 4 44 10 -7.96 0.00
 6 44 10 -13.31 0.00
 8 44 10 -13.52 0.00
 10 44 10 -8.69 0.00
 12 44 10 -3.42 0.00
 1 45 10 4.69 0.00
 3 45 10 6.60 0.00
 5 45 10 6.12 0.00
 7 45 10 8.31 0.00
 9 45 10 6.60 0.00
 11 45 10 2.10 0.00
 0 46 10 1.65 0.00
 2 46 10 4.77 0.00
 4 46 10 1.47 0.00
 6 46 10 1.05 0.00
 8 46 10 -0.04 0.00
 10 46 10 1.85 0.00
 1 47 10 -6.08 0.00
 3 47 10 -5.78 0.00
 5 47 10 2.79 0.00
 7 47 10 2.59 0.00
 0 48 10 -0.96 0.00
 2 48 10 0.63 0.00
 4 48 10 0.64 0.00
 6 48 10 -0.90 0.00
 14 0 11 -14.68 0.00
 20 0 11 20.45 0.00
 22 0 11 -7.94 0.00
 13 1 11 -30.32 0.00
 21 1 11 4.94 0.00
 23 1 11 -4.70 0.00
 14 2 11 -8.62 0.00
 22 2 11 -14.86 0.00
 13 3 11 -15.04 0.00
 21 3 11 0.17 0.00
 23 3 11 -5.78 0.00
 14 4 11 -13.48 0.00
 22 4 11 -15.83 0.00
 21 5 11 -1.18 0.00
 23 5 11 -4.98 0.00
 22 6 11 -15.09 0.00
 21 7 11 -9.05 0.00
 23 7 11 -8.62 0.00
 22 8 11 -16.56 0.00
 21 9 11 -4.96 0.00
 23 9 11 -5.60 0.00
 22 10 11 -16.16 0.00
 21 11 11 3.36 0.00
 23 11 11 -0.30 0.00
 20 12 11 0.41 0.00
 22 12 11 -10.35 0.00
 21 13 11 8.62 0.00
 23 13 11 1.22 0.00
 20 14 11 -3.95 0.00
 22 14 11 -7.92 0.00
 21 15 11 4.93 0.00
 23 15 11 2.70 0.00
 20 16 11 -1.95 0.00
 22 16 11 1.02 0.00
 19 17 11 -2.78 0.00
 21 17 11 -1.49 0.00
 20 18 11 4.33 0.00
 22 18 11 4.43 0.00
 19 19 11 -0.67 0.00
 21 19 11 2.72 0.00
 20 20 11 3.64 0.00
 22 20 11 5.87 0.00
 19 21 11 -8.12 0.00
 21 21 11 0.08 0.00
 18 22 11 4.06 0.00
 20 22 11 -0.96 0.00
 19 23 11 -3.09 0.00
 21 23 11 0.94 0.00
 18 24 11 -3.02 0.00
 20 24 11 -8.12 0.00
 17 25 11 -3.84 0.00
 19 25 11 -2.15 0.00
 21 25 11 -2.46 0.00
 16 26 11 -11.16 0.00
 18 26 11 -8.17 0.00
 20 26 11 -7.76 0.00
 9 27 11 0.15 0.00
 15 27 11 6.19 0.00
 17 27 11 0.05 0.00
 19 27 11 4.96 0.00
 10 28 11 3.79 0.00
 14 28 11 6.71 0.00
 16 28 11 -4.72 0.00
 18 28 11 -2.30 0.00
 20 28 11 -4.81 0.00
 13 29 11 -3.75 0.00
 15 29 11 3.46 0.00
 17 29 11 -3.52 0.00
 19 29 11 3.07 0.00
 10 30 11 7.72 0.00
 14 30 11 1.18 0.00
 16 30 11 -4.68 0.00
 18 30 11 3.69 0.00
 13 31 11 -14.25 0.00
 15 31 11 -11.21 0.00
 17 31 11 -11.97 0.00
 14 32 11 -1.64 0.00
 16 32 11 -4.11 0.00
 18 32 11 0.53 0.00
 13 33 11 -3.39 0.00
 15 33 11 0.45 0.00
 17 33 11 -3.13 0.00
 12 34 11 0.59 0.00
 14 34 11 7.50 0.00
 16 34 11 1.97 0.00
 11 35 11 -11.17 0.00
 13 35 11 -5.31 0.00
 15 35 11 -1.25 0.00
 17 35 11 -0.83 0.00
 10 36 11 -7.71 0.00
 12 36 11 -14.39 0.00
 14 36 11 -0.25 0.00
 16 36 11 -4.95 0.00
 11 37 11 0.58 0.00
 13 37 11 11.02 0.00
 15 37 11 0.99 0.00
 8 38 11 7.02 0.00
 10 38 11 0.74 0.00
 12 38 11 2.71 0.00
 14 38 11 3.98 0.00
 7 39 11 3.57 0.00
 9 39 11 10.29 0.00
 11 39 11 -2.23 0.00
 13 39 11 8.16 0.00
 6 40 11 -1.33 0.00
 8 40 11 0.03 0.00
 10 40 11 -3.97 0.00
 12 40 11 3.65 0.00
 14 40 11 -3.40 0.00
 5 41 11 3.97 0.00
 7 41 11 6.91 0.00
 9 41 11 4.75 0.00
 11 41 11 -4.73 0.00
 13 41 11 2.91 0.00
 0 42 11 -9.30 0.00
 2 42 11 -8.33 0.00
 4 42 11 0.36 0.00
 6 42 11 -6.09 0.00
 8 42 11 -8.47 0.00
 10 42 11 -5.03 0.00
 12 42 11 2.16 0.00
 1 43 11 0.72 0.00
 3 43 11 6.36 0.00
 5 43 11 3.77 0.00
 7 43 11 3.49 0.00
 9 43 11 0.76 0.00
 11 43 11 -0.50 0.00
 0 44 11 -8.24 0.00
 2 44 11 -10.47 0.00
 4 44 11 0.95 0.00
 6 44 11 -3.11 0.00
 8 44 11 -0.52 0.00
 10 44 11 4.53 0.00
 1 45 11 -4.89 0.00
 3 45 11 4.11 0.00
 5 45 11 -9.12 0.00
 7 45 11 -7.91 0.00
 9 45 11 -5.02 0.00
 0 46 11 -1.06 0.00
 2 46 11 -4.52 0.00
 4 46 11 -2.77 0.00
 6 46 11 -3.71 0.00
 8 46 11 -2.69 0.00
 1 47 11 1.91 0.00
 3 47 11 6.21 0.00
 5 47 11 -3.76 0.00
 0 48 11 2.43 0.00
 2 48 11 2.58 0.00
 4 48 11 -0.02 0.00
 14 0 12 -4.11 0.00
 20 0 12 5.65 0.00
 22 0 12 -1.31 0.00
 21 1 12 7.42 0.00
 23 1 12 -16.89 0.00
 14 2 12 -8.12 0.00
 20 2 12 -4.04 0.00
 22 2 12 -6.51 0.00
 21 3 12 -7.80 0.00
 23 3 12 -17.61 0.00
 14 4 12 -4.42 0.00
 20 4 12 3.33 0.00
 22 4 12 -4.78 0.00
 21 5 12 -9.92 0.00
 23 5 12 -7.42 0.00
 20 6 12 8.31 0.00
 22 6 12 -9.95 0.00
 21 7 12 -4.97 0.00
 23 7 12 -5.48 0.00
 20 8 12 13.84 0.00
 22 8 12 -10.14 0.00
 21 9 12 2.25 0.00
 23 9 12 -2.97 0.00
 20 10 12 10.17 0.00
 22 10 12 -4.68 0.00
 21 11 12 1.43 0.00
 23 11 12 -2.68 0.00
 20 12 12 5.38 0.00
 22 12 12 3.77 0.00
 19 13 12 -7.92 0.00
 21 13 12 -3.96 0.00
 20 14 12 -1.42 0.00
 22 14 12 1.64 0.00
 19 15 12 -2.57 0.00
 21 15 12 -4.40 0.00
 20 16 12 1.74 0.00
 22 16 12 1.91 0.00
 19 17 12 1.78 0.00
 21 17 12 -2.58 0.00
 18 18 12 3.08 0.00
 20 18 12 -5.53 0.00
 22 18 12 -0.06 0.00
 7 19 12 -7.54 0.00
 19 19 12 7.71 0.00
 21 19 12 3.77 0.00
 18 20 12 5.05 0.00
 20 20 12 -4.51 0.00
 7 21 12 -2.16 0.00
 17 21 12 5.27 0.00
 19 21 12 2.33 0.00
 21 21 12 -0.64 0.00
 8 22 12 3.90 0.00
 18 22 12 4.56 0.00
 20 22 12 -4.66 0.00
 17 23 12 4.91 0.00
 19 23 12 1.05 0.00
 16 24 12 -5.41 0.00
 18 24 12 9.87 0.00
 20 24 12 -1.31 0.00
 17 25 12 -2.52 0.00
 19 25 12 -3.24 0.00
 8 26 12 -3.73 0.00
 16 26 12 -12.24 0.00
 18 26 12 6.77 0.00
 15 27 12 0.30 0.00
 17 27 12 -6.43 0.00
 19 27 12 -5.10 0.00
 8 28 12 -3.92 0.00
 14 28 12 13.06 0.00
 16 28 12 -3.93 0.00
 18 28 12 9.75 0.00
 13 29 12 -5.19 0.00
 15 29 12 -9.72 0.00
 17 29 12 -4.26 0.00
 14 30 12 -8.86 0.00
 16 30 12 -12.83 0.00
 18 30 12 -1.78 0.00
 13 31 12 3.88 0.00
 15 31 12 -2.20 0.00
 17 31 12 3.04 0.00
 12 32 12 -3.69 0.00
 14 32 12 -5.14 0.00
 16 32 12 -4.15 0.00
 11 33 12 -1.71 0.00
 13 33 12 5.44 0.00
 15 33 12 -6.21 0.00
 17 33 12 0.20 0.00
 12 34 12 -3.81 0.00
 14 34 12 -4.52 0.00
 16 34 12 -3.55 0.00
 11 35 12 -7.75 0.00
 13 35 12 6.24 0.00
 15 35 12 -2.35 0.00
 10 36 12 -2.63 0.00
 12 36 12 4.82 0.00
 14 36 12 4.58 0.00
 9 37 12 5.02 0.00
 11 37 12 -3.03 0.00
 13 37 12 -1.31 0.00
 0 38 12 9.76 0.00
 6 38 12 -5.08 0.00
 8 38 12 -2.74 0.00
 10 38 12 -5.61 0.00
 12 38 12 -3.11 0.00
 14 38 12 -0.62 0.00
 5 39 12 1.82 0.00
 7 39 12 3.23 0.00
 9 39 12 -1.95 0.00
 11 39 12 1.56 0.00
 13 39 12 -4.78 0.00
 0 40 12 3.15 0.00
 2 40 12 -6.44 0.00
 4 40 12 1.48 0.00
 6 40 12 -2.52 0.00
 8 40 12 9.93 0.00
 10 40 12 3.94 0.00
 12 40 12 -0.89 0.00
 1 41 12 -7.13 0.00
 3 41 12 1.58 0.00
 5 41 12 0.86 0.00
 7 41 12 -3.29 0.00
 9 41 12 -0.56 0.00
 11 41 12 3.23 0.00
 0 42 12 3.19 0.00
 2 42 12 0.62 0.00
 4 42 12 10.02 0.00
 6 42 12 0.77 0.00
 8 42 12 11.91 0.00
 10 42 12 0.58 0.00
 1 43 12 -6.28 0.00
 3 43 12 1.26 0.00
 5 43 12 -4.11 0.00
 7 43 12 -3.54 0.00
 9 43 12 2.63 0.00
 0 44 12 -2.65 0.00
 2 44 12 -0.65 0.00
 4 44 12 4.07 0.00
 6 44 12 -3.02 0.00
 8 44 12 4.69 0.00
 1 45 12 -7.70 0.00
 3 45 12 -4.37 0.00
 5 45 12 -5.61 0.00
 7 45 12 -2.86 0.00
 0 46 12 1.07 0.00
 2 46 12 1.52 0.00
 4 46 12 3.36 0.00
 6 46 12 -0.98 0.00
 1 47 12 -0.60 0.00
 3 47 12 -2.62 0.00
 14 0 13 7.68 0.00
 20 0 13 11.47 0.00
 22 0 13 -15.64 0.00
 19 1 13 -3.41 0.00
 21 1 13 0.30 0.00
 23 1 13 -6.48 0.00
 14 2 13 6.59 0.00
 20 2 13 3.24 0.00
 22 2 13 -13.41 0.00
 19 3 13 2.26 0.00
 21 3 13 1.90 0.00
 20 4 13 -3.48 0.00
 22 4 13 -6.30 0.00
 19 5 13 -0.85 0.00
 21 5 13 -5.76 0.00
 20 6 13 -6.92 0.00
 22 6 13 -1.06 0.00
 19 7 13 10.60 0.00
 21 7 13 -1.36 0.00
 20 8 13 -4.12 0.00
 22 8 13 1.46 0.00
 19 9 13 7.42 0.00
 21 9 13 1.56 0.00
 20 10 13 -2.64 0.00
 22 10 13 6.70 0.00
 19 11 13 0.80 0.00
 21 11 13 3.43 0.00
 20 12 13 -9.31 0.00
 22 12 13 1.86 0.00
 19 13 13 -2.96 0.00
 21 13 13 1.52 0.00
 18 14 13 -7.14 0.00
 20 14 13 -9.77 0.00
 19 15 13 3.99 0.00
 21 15 13 2.26 0.00
 18 16 13 -7.11 0.00
 20 16 13 -2.71 0.00
 19 17 13 9.19 0.00
 21 17 13 -1.15 0.00
 0 18 13 -2.01 0.00
 18 18 13 -0.01 0.00
 20 18 13 6.30 0.00
 17 19 13 -4.80 0.00
 19 19 13 0.90 0.00
 18 20 13 -5.75 0.00
 20 20 13 0.17 0.00
 17 21 13 2.89 0.00
 19 21 13 0.25 0.00
 16 22 13 6.97 0.00
 18 22 13 6.19 0.00
 20 22 13 4.31 0.00
 15 23 13 -10.58 0.00
 17 23 13 1.33 0.00
 19 23 13 0.04 0.00
 16 24 13 2.60 0.00
 18 24 13 0.86 0.00
 15 25 13 -6.43 0.00
 17 25 13 4.78 0.00
 19 25 13 6.55 0.00
 14 26 13 6.08 0.00
 16 26 13 1.56 0.00
 18 26 13 2.48 0.00
 13 27 13 6.35 0.00
 15 27 13 2.05 0.00
 17 27 13 1.74 0.00
 14 28 13 6.84 0.00
 16 28 13 -0.57 0.00
 18 28 13 -0.78 0.00
 13 29 13 -2.23 0.00
 15 29 13 0.70 0.00
 17 29 13 -3.72 0.00
 12 30 13 -2.73 0.00
 14 30 13 -3.22 0.00
 16 30 13 -2.52 0.00
 11 31 13 5.03 0.00
 13 31 13 -3.64 0.00
 15 31 13 0.55 0.00
 17 31 13 -4.23 0.00
 0 32 13 12.10 0.00
 12 32 13 5.79 0.00
 14 32 13 -4.67 0.00
 16 32 13 0.12 0.00
 11 33 13 3.90 0.00
 13 33 13 -6.39 0.00
 15 33 13 1.25 0.00
 0 34 13 -4.30 0.00
 10 34 13 3.51 0.00
 12 34 13 2.36 0.00
 14 34 13 0.46 0.00
 1 35 13 -3.96 0.00
 9 35 13 -7.38 0.00
 11 35 13 -1.00 0.00
 13 35 13 -1.06 0.00
 15 35 13 5.63 0.00
 0 36 13 -5.03 0.00
 8 36 13 8.89 0.00
 10 36 13 4.42 0.00
 12 36 13 -3.50 0.00
 14 36 13 1.20 0.00
 7 37 13 -1.13 0.00
 9 37 13 -1.63 0.00
 11 37 13 -1.38 0.00
 13 37 13 0.07 0.00
 4 38 13 -5.07 0.00
 6 38 13 -1.96 0.00
 8 38 13 4.68 0.00
 10 38 13 -0.66 0.00
 12 38 13 -2.18 0.00
 1 39 13 6.90 0.00
 3 39 13 -5.99 0.00
 5 39 13 -2.15 0.00
 7 39 13 -2.66 0.00
 9 39 13 -0.40 0.00
 11 39 13 -3.69 0.00
 0 40 13 6.76 0.00
 2 40 13 1.35 0.00
 4 40 13 1.60 0.00
 6 40 13 2.28 0.00
 8 40 13 4.32 0.00
 10 40 13 1.05 0.00
 1 41 13 0.19 0.00
 3 41 13 -10.61 0.00
 5 41 13 -3.27 0.00
 7 41 13 -1.78 0.00
 9 41 13 -1.74 0.00
 0 42 13 8.32 0.00
 2 42 13 1.07 0.00
 4 42 13 8.70 0.00
 6 42 13 2.70 0.00
 8 42 13 0.92 0.00
 1 43 13 -1.05 0.00
 3 43 13 0.84 0.00
 5 43 13 5.85 0.00
 7 43 13 7.25 0.00
 0 44 13 1.42 0.00
 2 44 13 -7.11 0.00
 4 44 13 2.51 0.00
 6 44 13 -3.26 0.00
 1 45 13 0.69 0.00
 3 45 13 6.00 0.00
 5 45 13 0.93 0.00
 0 46 13 2.57 0.00
 2 46 13 -1.84 0.00
 18 0 14 12.16 0.00
 20 0 14 -1.25 0.00
 22 0 14 6.34 0.00
 19 1 14 4.67 0.00
 21 1 14 -7.78 0.00
 18 2 14 3.02 0.00
 20 2 14 -12.37 0.00
 22 2 14 1.47 0.00
 19 3 14 7.89 0.00
 21 3 14 -13.35 0.00
 18 4 14 5.08 0.00
 20 4 14 -5.65 0.00
 22 4 14 5.82 0.00
 19 5 14 13.81 0.00
 21 5 14 -10.29 0.00
 18 6 14 4.73 0.00
 20 6 14 -1.43 0.00
 19 7 14 1.86 0.00
 21 7 14 -7.21 0.00
 18 8 14 4.07 0.00
 20 8 14 4.08 0.00
 19 9 14 -4.61 0.00
 21 9 14 -0.03 0.00
 18 10 14 5.99 0.00
 20 10 14 4.98 0.00
 19 11 14 -13.60 0.00
 21 11 14 0.08 0.00
 18 12 14 -1.27 0.00
 20 12 14 0.50 0.00
 17 13 14 -1.20 0.00
 19 13 14 -13.70 0.00
 21 13 14 1.93 0.00
 18 14 14 6.02 0.00
 20 14 14 7.73 0.00
 17 15 14 -2.43 0.00
 19 15 14 -6.17 0.00
 18 16 14 6.04 0.00
 20 16 14 9.58 0.00
 17 17 14 -5.50 0.00
 19 17 14 0.58 0.00
 16 18 14 -6.42 0.00
 18 18 14 -3.16 0.00
 20 18 14 4.01 0.00
 17 19 14 -4.36 0.00
 19 19 14 1.72 0.00
 16 20 14 -2.95 0.00
 18 20 14 -5.32 0.00
 15 21 14 0.09 0.00
 17 21 14 -3.67 0.00
 19 21 14 -4.16 0.00
 14 22 14 -9.91 0.00
 16 22 14 -2.12 0.00
 18 22 14 -3.43 0.00
 15 23 14 3.59 0.00
 17 23 14 3.06 0.00
 14 24 14 -9.39 0.00
 16 24 14 1.01 0.00
 18 24 14 2.58 0.00
 13 25 14 2.26 0.00
 15 25 14 2.70 0.00
 17 25 14 -1.06 0.00
 12 26 14 -2.33 0.00
 14 26 14 -1.73 0.00
 16 26 14 -3.44 0.00
 18 26 14 -0.99 0.00
 13 27 14 11.78 0.00
 15 27 14 8.00 0.00
 17 27 14 -2.36 0.00
 12 28 14 -2.32 0.00
 14 28 14 4.31 0.00
 16 28 14 0.90 0.00
 11 29 14 -4.87 0.00
 13 29 14 0.80 0.00
 15 29 14 4.55 0.00
 10 30 14 6.41 0.00
 12 30 14 0.82 0.00
 14 30 14 3.02 0.00
 16 30 14 5.23 0.00
 11 31 14 5.04 0.00
 13 31 14 -0.44 0.00
 15 31 14 1.81 0.00
 10 32 14 2.04 0.00
 12 32 14 -0.84 0.00
 14 32 14 -2.22 0.00
 9 33 14 5.43 0.00
 11 33 14 5.77 0.00
 13 33 14 0.95 0.00
 8 34 14 -4.08 0.00
 10 34 14 -3.14 0.00
 12 34 14 4.57 0.00
 14 34 14 2.69 0.00
 7 35 14 -2.70 0.00
 9 35 14 1.16 0.00
 11 35 14 0.84 0.00
 13 35 14 1.33 0.00
 0 36 14 -2.46 0.00
 4 36 14 1.50 0.00
 6 36 14 15.16 0.00
 8 36 14 2.85 0.00
 10 36 14 1.15 0.00
 12 36 14 1.38 0.00
 1 37 14 -6.55 0.00
 3 37 14 -3.36 0.00
 5 37 14 -0.81 0.00
 7 37 14 11.91 0.00
 9 37 14 6.07 0.00
 11 37 14 3.40 0.00
 0 38 14 3.75 0.00
 2 38 14 3.84 0.00
 4 38 14 -5.05 0.00
 6 38 14 1.51 0.00
 8 38 14 -11.20 0.00
 10 38 14 -2.63 0.00
 1 39 14 -0.41 0.00
 3 39 14 -3.03 0.00
 5 39 14 -7.36 0.00
 7 39 14 -1.04 0.00
 9 39 14 -7.26 0.00
 0 40 14 0.64 0.00
 2 40 14 -2.34 0.00
 4 40 14 -6.69 0.00
 6 40 14 -1.61 0.00
 8 40 14 -4.04 0.00
 1 41 14 6.81 0.00
 3 41 14 8.99 0.00
 5 41 14 5.58 0.00
 7 41 14 6.86 0.00
 0 42 14 1.69 0.00
 2 42 14 -0.41 0.00
 4 42 14 -3.92 0.00
 6 42 14 -1.81 0.00
 1 43 14 4.58 0.00
 3 43 14 3.73 0.00
 5 43 14 -2.73 0.00
 0 44 14 0.44 0.00
 2 44 14 1.18 0.00
 18 0 15 1.90 0.00
 20 0 15 -0.91 0.00
 17 1 15 4.59 0.00
 19 1 15 -7.76 0.00
 21 1 15 4.93 0.00
 18 2 15 10.26 0.00
 20 2 15 -1.76 0.00
 17 3 15 2.62 0.00
 19 3 15 -1.35 0.00
 21 3 15 5.08 0.00
 18 4 15 15.81 0.00
 20 4 15 -4.75 0.00
 17 5 15 -2.61 0.00
 19 5 15 -3.79 0.00
 21 5 15 -2.24 0.00
 18 6 15 8.82 0.00
 20 6 15 -4.63 0.00
 17 7 15 6.35 0.00
 19 7 15 6.90 0.00
 18 8 15 -0.41 0.00
 20 8 15 -3.92 0.00
 17 9 15 1.79 0.00
 19 9 15 -0.03 0.00
 18 10 15 -11.33 0.00
 20 10 15 -5.51 0.00
 17 11 15 4.49 0.00
 19 11 15 3.97 0.00
 16 12 15 2.95 0.00
 18 12 15 -2.15 0.00
 20 12 15 0.76 0.00
 17 13 15 1.78 0.00
 19 13 15 6.46 0.00
 16 14 15 -6.32 0.00
 18 14 15 -8.20 0.00
 20 14 15 -3.15 0.00
 17 15 15 -0.65 0.00
 19 15 15 10.09 0.00
 16 16 15 1.51 0.00
 18 16 15 3.71 0.00
 15 17 15 0.08 0.00
 17 17 15 -7.90 0.00
 19 17 15 9.69 0.00
 16 18 15 -6.80 0.00
 18 18 15 -1.38 0.00
 15 19 15 -2.38 0.00
 17 19 15 -14.67 0.00
 19 19 15 -0.94 0.00
 14 20 15 7.79 0.00
 16 20 15 -5.25 0.00
 18 20 15 -1.73 0.00
 13 21 15 -4.77 0.00
 15 21 15 -0.13 0.00
 17 21 15 -3.53 0.00
 14 22 15 6.24 0.00
 16 22 15 -5.20 0.00
 18 22 15 0.17 0.00
 13 23 15 -5.00 0.00
 15 23 15 -0.93 0.00
 17 23 15 3.53 0.00
 12 24 15 -4.33 0.00
 14 24 15 2.70 0.00
 16 24 15 -8.82 0.00
 11 25 15 -6.42 0.00
 13 25 15 -7.10 0.00
 15 25 15 -8.76 0.00
 17 25 15 0.67 0.00
 12 26 15 -4.63 0.00
 14 26 15 6.92 0.00
 16 26 15 -4.85 0.00
 11 27 15 -10.60 0.00
 13 27 15 -4.65 0.00
 15 27 15 -3.54 0.00
 10 28 15 3.71 0.00
 12 28 15 -2.64 0.00
 14 28 15 9.72 0.00
 16 28 15 -2.03 0.00
 9 29 15 7.11 0.00
 11 29 15 -5.48 0.00
 13 29 15 1.10 0.00
 15 29 15 2.03 0.00
 10 30 15 3.49 0.00
 12 30 15 1.89 0.00
 14 30 15 6.70 0.00
 9 31 15 -0.18 0.00
 11 31 15 -5.53 0.00
 13 31 15 0.57 0.00
 8 32 15 1.74 0.00
 10 32 15 4.36 0.00
 12 32 15 0.98 0.00
 14 32 15 -1.26 0.00
 5 33 15 -0.53 0.00
 7 33 15 3.96 0.00
 9 33 15 4.24 0.00
 11 33 15 1.05 0.00
 13 33 15 1.76 0.00
 0 34 15 -10.79 0.00
 2 34 15 3.70 0.00
 4 34 15 -2.22 0.00
 6 34 15 -1.15 0.00
 8 34 15 2.50 0.00
 10 34 15 7.76 0.00
 12 34 15 4.07 0.00
 1 35 15 -6.23 0.00
 3 35 15 0.41 0.00
 5 35 15 4.69 0.00
 7 35 15 2.31 0.00
 9 35 15 -1.17 0.00
 11 35 15 -1.02 0.00
 0 36 15 -7.26 0.00
 2 36 15 4.72 0.00
 4 36 15 -3.30 0.00
 6 36 15 -1.61 0.00
 8 36 15 0.98 0.00
 10 36 15 0.16 0.00
 1 37 15 -0.07 0.00
 3 37 15 0.85 0.00
 5 37 15 4.61 0.00
 7 37 15 0.11 0.00
 9 37 15 -0.81 0.00
 0 38 15 -0.40 0.00
 2 38 15 5.41 0.00
 4 38 15 -5.04 0.00
 6 38 15 0.25 0.00
 8 38 15 -0.20 0.00
 1 39 15 6.75 0.00
 3 39 15 0.21 0.00
 5 39 15 4.20 0.00
 7 39 15 0.77 0.00
 0 40 15 1.35 0.00
 2 40 15 4.42 0.00
 4 40 15 -2.35 0.00
 6 40 15 3.23 0.00
 1 41 15 3.90 0.00
 3 41 15 -3.84 0.00
 5 41 15 -1.57 0.00
 0 42 15 5.81 0.00
 2 42 15 3.48 0.00
 12 0 16 -3.93 0.00
 16 0 16 7.81 0.00
 18 0 16 -6.44 0.00
 20 0 16 13.39 0.00
 13 1 16 9.28 0.00
 17 1 16 9.54 0.00
 19 1 16 1.92 0.00
 16 2 16 3.73 0.00
 18 2 16 -11.86 0.00
 20 2 16 5.52 0.00
 17 3 16 5.12 0.00
 19 3 16 4.22 0.00
 16 4 16 5.03 0.00
 18 4 16 -1.16 0.00
 20 4 16 6.26 0.00
 17 5 16 4.23 0.00
 19 5 16 7.32 0.00
 16 6 16 2.49 0.00
 18 6 16 -6.15 0.00
 17 7 16 -5.09 0.00
 19 7 16 0.26 0.00
 16 8 16 7.21 0.00
 18 8 16 -1.44 0.00
 15 9 16 5.88 0.00
 17 9 16 -4.24 0.00
 19 9 16 -1.18 0.00
 16 10 16 -3.62 0.00
 18 10 16 -1.81 0.00
 15 11 16 -1.56 0.00
 17 11 16 -3.03 0.00
 19 11 16 -2.48 0.00
 16 12 16 -5.60 0.00
 18 12 16 7.52 0.00
 15 13 16 -1.81 0.00
 17 13 16 2.59 0.00
 19 13 16 -1.79 0.00
 14 14 16 -0.96 0.00
 16 14 16 -10.36 0.00
 18 14 16 8.14 0.00
 15 15 16 -1.51 0.00
 17 15 16 1.86 0.00
 14 16 16 1.04 0.00
 16 16 16 -8.17 0.00
 18 16 16 4.33 0.00
 13 17 16 -1.32 0.00
 15 17 16 2.73 0.00
 17 17 16 -0.97 0.00
 14 18 16 -0.12 0.00
 16 18 16 -11.84 0.00
 18 18 16 -3.96 0.00
 13 19 16 7.02 0.00
 15 19 16 5.11 0.00
 17 19 16 -0.57 0.00
 12 20 16 7.77 0.00
 14 20 16 5.79 0.00
 16 20 16 -2.03 0.00
 13 21 16 4.68 0.00
 15 21 16 -3.91 0.00
 17 21 16 -1.66 0.00
 12 22 16 4.10 0.00
 14 22 16 -1.46 0.00
 16 22 16 0.27 0.00
 11 23 16 -1.89 0.00
 13 23 16 2.15 0.00
 15 23 16 -5.93 0.00
 10 24 16 0.45 0.00
 12 24 16 -0.30 0.00
 14 24 16 -2.81 0.00
 16 24 16 4.27 0.00
 11 25 16 -4.37 0.00
 13 25 16 -0.68 0.00
 15 25 16 -6.29 0.00
 10 26 16 -5.48 0.00
 12 26 16 -10.28 0.00
 14 26 16 -6.27 0.00
 9 27 16 2.69 0.00
 11 27 16 -2.37 0.00
 13 27 16 3.05 0.00
 15 27 16 -2.82 0.00
 8 28 16 -1.35 0.00
 10 28 16 -4.68 0.00
 12 28 16 -8.72 0.00
 14 28 16 -0.25 0.00
 7 29 16 1.40 0.00
 9 29 16 1.36 0.00
 11 29 16 -0.62 0.00
 13 29 16 4.84 0.00
 6 30 16 -1.75 0.00
 8 30 16 -4.40 0.00
 10 30 16 -5.23 0.00
 12 30 16 -8.34 0.00
 1 31 16 -10.89 0.00
 3 31 16 -2.32 0.00
 5 31 16 0.11 0.00
 7 31 16 2.79 0.00
 9 31 16 3.84 0.00
 11 31 16 -0.13 0.00
 13 31 16 -1.05 0.00
 0 32 16 -2.69 0.00
 2 32 16 -14.17 0.00
 4 32 16 0.53 0.00
 6 32 16 -3.20 0.00
 8 32 16 2.41 0.00
 10 32 16 -2.21 0.00
 12 32 16 -3.88 0.00
 1 33 16 -9.35 0.00
 3 33 16 -3.35 0.00
 5 33 16 -3.86 0.00
 7 33 16 -2.27 0.00
 9 33 16 3.52 0.00
 11 33 16 1.17 0.00
 0 34 16 7.31 0.00
 2 34 16 -4.95 0.00
 4 34 16 5.11 0.00
 6 34 16 -0.91 0.00
 8 34 16 -0.15 0.00
 10 34 16 -3.27 0.00
 1 35 16 1.62 0.00
 3 35 16 0.73 0.00
 5 35 16 -2.89 0.00
 7 35 16 -3.19 0.00
 9 35 16 1.30 0.00
 0 36 16 -4.59 0.00
 2 36 16 -5.74 0.00
 4 36 16 0.12 0.00
 6 36 16 4.87 0.00
 8 36 16 1.49 0.00
 1 37 16 1.61 0.00
 3 37 16 1.04 0.00
 5 37 16 -0.80 0.00
 7 37 16 0.30 0.00
 0 38 16 -1.44 0.00
 2 38 16 3.72 0.00
 4 38 16 2.31 0.00
 6 38 16 3.15 0.00
 1 39 16 2.99 0.00
 3 39 16 2.18 0.00
 5 39 16 -0.53 0.00
 0 40 16 -1.48 0.00
 2 40 16 3.64 0.00
 12 0 17 15.18 0.00
 14 0 17 14.48 0.00
 16 0 17 11.14 0.00
 18 0 17 -1.92 0.00
 15 1 17 -0.38 0.00
 17 1 17 -3.98 0.00
 19 1 17 1.10 0.00
 12 2 17 4.61 0.00
 14 2 17 7.33 0.00
 16 2 17 7.22 0.00
 18 2 17 3.54 0.00
 15 3 17 5.39 0.00
 17 3 17 -6.57 0.00
 14 4 17 4.01 0.00
 16 4 17 -2.93 0.00
 18 4 17 1.66 0.00
 15 5 17 8.90 0.00
 17 5 17 -3.62 0.00
 14 6 17 -1.39 0.00
 16 6 17 -3.43 0.00
 18 6 17 0.79 0.00
 15 7 17 -1.11 0.00
 17 7 17 1.19 0.00
 14 8 17 -1.75 0.00
 16 8 17 0.98 0.00
 18 8 17 -3.45 0.00
 15 9 17 -10.80 0.00
 17 9 17 3.01 0.00
 14 10 17 -0.69 0.00
 16 10 17 2.64 0.00
 18 10 17 -3.15 0.00
 15 11 17 -11.12 0.00
 17 11 17 4.44 0.00
 14 12 17 2.54 0.00
 16 12 17 3.99 0.00
 18 12 17 -0.50 0.00
 13 13 17 -5.82 0.00
 15 13 17 -14.84 0.00
 17 13 17 0.22 0.00
 14 14 17 -5.54 0.00
 16 14 17 -2.39 0.00
 13 15 17 -3.96 0.00
 15 15 17 -12.88 0.00
 17 15 17 -1.77 0.00
 12 16 17 -1.52 0.00
 14 16 17 7.29 0.00
 16 16 17 7.47 0.00
 11 17 17 -6.13 0.00
 13 17 17 6.98 0.00
 15 17 17 -7.51 0.00
 17 17 17 -2.40 0.00
 12 18 17 -2.85 0.00
 14 18 17 0.41 0.00
 16 18 17 0.78 0.00
 11 19 17 0.02 0.00
 13 19 17 8.04 0.00
 15 19 17 -3.15 0.00
 10 20 17 3.52 0.00
 12 20 17 8.09 0.00
 14 20 17 3.99 0.00
 16 20 17 3.81 0.00
 11 21 17 8.50 0.00
 13 21 17 2.61 0.00
 15 21 17 3.16 0.00
 10 22 17 -6.77 0.00
 12 22 17 2.25 0.00
 14 22 17 -5.32 0.00
 9 23 17 -0.94 0.00
 11 23 17 8.60 0.00
 13 23 17 -0.08 0.00
 15 23 17 7.28 0.00
 8 24 17 0.40 0.00
 10 24 17 -1.89 0.00
 12 24 17 4.46 0.00
 14 24 17 -7.46 0.00
 7 25 17 6.35 0.00
 9 25 17 -4.00 0.00
 11 25 17 -0.07 0.00
 13 25 17 -7.88 0.00
 6 26 17 -6.76 0.00
 8 26 17 -4.61 0.00
 10 26 17 -6.40 0.00
 12 26 17 1.61 0.00
 5 27 17 -1.62 0.00
 7 27 17 -1.55 0.00
 9 27 17 -9.29 0.00
 11 27 17 -1.18 0.00
 13 27 17 -3.69 0.00
 0 28 17 -4.36 0.00
 2 28 17 -2.52 0.00
 4 28 17 1.76 0.00
 6 28 17 1.52 0.00
 8 28 17 5.66 0.00
 10 28 17 -0.68 0.00
 12 28 17 6.44 0.00
 1 29 17 17.87 0.00
 3 29 17 1.79 0.00
 5 29 17 5.04 0.00
 7 29 17 -0.63 0.00
 9 29 17 -8.38 0.00
 11 29 17 -1.50 0.00
 0 30 17 10.10 0.00
 2 30 17 0.77 0.00
 4 30 17 3.67 0.00
 6 30 17 -2.15 0.00
 8 30 17 1.64 0.00
 10 30 17 -6.89 0.00
 1 31 17 8.97 0.00
 3 31 17 -2.44 0.00
 5 31 17 0.10 0.00
 7 31 17 -4.56 0.00
 9 31 17 -10.29 0.00
 11 31 17 -2.70 0.00
 0 32 17 1.50 0.00
 2 32 17 -9.46 0.00
 4 32 17 1.66 0.00
 6 32 17 -3.65 0.00
 8 32 17 4.74 0.00
 10 32 17 -1.78 0.00
 1 33 17 7.46 0.00
 3 33 17 5.48 0.00
 5 33 17 8.01 0.00
 7 33 17 4.28 0.00
 9 33 17 -0.99 0.00
 0 34 17 0.54 0.00
 2 34 17 -5.72 0.00
 4 34 17 5.01 0.00
 6 34 17 -6.17 0.00
 8 34 17 2.28 0.00
 1 35 17 -4.21 0.00
 3 35 17 -1.41 0.00
 5 35 17 0.64 0.00
 7 35 17 0.29 0.00
 0 36 17 4.53 0.00
 2 36 17 -1.42 0.00
 4 36 17 2.86 0.00
 6 36 17 -4.69 0.00
 1 37 17 -1.74 0.00
 3 37 17 0.22 0.00
 0 38 17 4.76 0.00
 10 0 18 7.69 0.00
 12 0 18 -4.52 0.00
 14 0 18 -2.34 0.00
 16 0 18 -2.45 0.00
 11 1 18 2.84 0.00
 13 1 18 1.39 0.00
 15 1 18 9.31 0.00
 17 1 18 2.42 0.00
 12 2 18 -7.07 0.00
 14 2 18 -0.54 0.00
 16 2 18 -6.42 0.00
 11 3 18 7.78 0.00
 13 3 18 5.82 0.00
 15 3 18 6.60 0.00
 17 3 18 0.61 0.00
 12 4 18 -1.84 0.00
 14 4 18 10.39 0.00
 16 4 18 -4.95 0.00
 13 5 18 -4.67 0.00
 15 5 18 -2.52 0.00
 17 5 18 -4.49 0.00
 12 6 18 -4.22 0.00
 14 6 18 4.43 0.00
 16 6 18 -0.66 0.00
 13 7 18 -1.83 0.00
 15 7 18 4.78 0.00
 17 7 18 -2.17 0.00
 12 8 18 6.26 0.00
 14 8 18 -1.02 0.00
 16 8 18 4.42 0.00
 11 9 18 1.05 0.00
 13 9 18 2.23 0.00
 15 9 18 6.04 0.00
 17 9 18 -4.15 0.00
 12 10 18 11.29 0.00
 14 10 18 -1.53 0.00
 16 10 18 3.15 0.00
 11 11 18 -0.98 0.00
 13 11 18 2.92 0.00
 15 11 18 4.42 0.00
 12 12 18 1.52 0.00
 14 12 18 -9.08 0.00
 16 12 18 -7.15 0.00
 11 13 18 -1.79 0.00
 13 13 18 1.27 0.00
 15 13 18 -0.22 0.00
 10 14 18 -4.98 0.00
 12 14 18 -0.66 0.00
 14 14 18 -7.50 0.00
 16 14 18 -7.03 0.00
 11 15 18 -8.08 0.00
 13 15 18 -2.53 0.00
 15 15 18 2.69 0.00
 10 16 18 -6.39 0.00
 12 16 18 -1.84 0.00
 14 16 18 -7.08 0.00
 9 17 18 8.19 0.00
 11 17 18 0.32 0.00
 13 17 18 0.75 0.00
 15 17 18 5.95 0.00
 10 18 18 0.11 0.00
 12 18 18 2.88 0.00
 14 18 18 -3.97 0.00
 9 19 18 -1.60 0.00
 11 19 18 -4.24 0.00
 13 19 18 0.02 0.00
 8 20 18 -7.88 0.00
 10 20 18 -1.97 0.00
 12 20 18 3.39 0.00
 14 20 18 2.80 0.00
 7 21 18 1.13 0.00
 9 21 18 0.46 0.00
 11 21 18 0.28 0.00
 13 21 18 1.48 0.00
 6 22 18 8.38 0.00
 8 22 18 9.16 0.00
 10 22 18 7.66 0.00
 12 22 18 1.16 0.00
 5 23 18 -1.35 0.00
 7 23 18 -2.18 0.00
 9 23 18 -4.89 0.00
 11 23 18 -2.89 0.00
 13 23 18 -1.16 0.00
 0 24 18 -11.69 0.00
 2 24 18 -9.31 0.00
 4 24 18 -5.55 0.00
 6 24 18 4.82 0.00
 8 24 18 -2.72 0.00
 10 24 18 2.73 0.00
 12 24 18 -0.66 0.00
 1 25 18 -10.17 0.00
 3 25 18 -5.21 0.00
 5 25 18 -8.45 0.00
 7 25 18 -4.19 0.00
 9 25 18 -5.14 0.00
 11 25 18 1.06 0.00
 0 26 18 -9.65 0.00
 2 26 18 -8.93 0.00
 4 26 18 -15.83 0.00
 6 26 18 8.57 0.00
 8 26 18 -9.31 0.00
 10 26 18 2.19 0.00
 12 26 18 -2.37 0.00
 1 27 18 -7.76 0.00
 3 27 18 -4.65 0.00
 5 27 18 -2.36 0.00
 7 27 18 3.34 0.00
 9 27 18 -3.38 0.00
 11 27 18 2.78 0.00
 0 28 18 11.92 0.00
 2 28 18 9.99 0.00
 4 28 18 -9.06 0.00
 6 28 18 12.92 0.00
 8 28 18 -12.04 0.00
 10 28 18 5.59 0.00
 1 29 18 3.61 0.00
 3 29 18 0.10 0.00
 5 29 18 -2.89 0.00
 7 29 18 3.19 0.00
 9 29 18 -3.64 0.00
 0 30 18 9.53 0.00
 2 30 18 7.59 0.00
 4 30 18 -4.76 0.00
 6 30 18 4.29 0.00
 8 30 18 -16.13 0.00
 1 31 18 -0.19 0.00
 3 31 18 5.06 0.00
 5 31 18 1.57 0.00
 7 31 18 5.83 0.00
 0 32 18 13.32 0.00
 2 32 18 9.54 0.00
 4 32 18 6.90 0.00
 6 32 18 7.37 0.00
 1 33 18 0.42 0.00
 3 33 18 1.09 0.00
 5 33 18 -4.65 0.00
 0 34 18 2.56 0.00
 2 34 18 0.58 0.00
 4 34 18 0.59 0.00
 1 35 18 2.40 0.00
 0 0 19 0.06 0.00
 8 0 19 -8.77 0.00
 10 0 19 -4.33 0.00
 12 0 19 -2.15 0.00
 14 0 19 -0.23 0.00
 16 0 19 8.80 0.00
 9 1 19 14.26 0.00
 11 1 19 -4.81 0.00
 13 1 19 -4.59 0.00
 15 1 19 -6.30 0.00
 8 2 19 -5.13 0.00
 10 2 19 -2.03 0.00
 12 2 19 -3.36 0.00
 14 2 19 -0.79 0.00
 16 2 19 2.97 0.00
 9 3 19 3.56 0.00
 11 3 19 -6.47 0.00
 13 3 19 -6.91 0.00
 15 3 19 2.29 0.00
 10 4 19 1.41 0.00
 12 4 19 -4.17 0.00
 14 4 19 4.38 0.00
 16 4 19 -1.41 0.00
 11 5 19 3.40 0.00
 13 5 19 -5.00 0.00
 15 5 19 7.48 0.00
 10 6 19 5.68 0.00
 12 6 19 -2.95 0.00
 14 6 19 4.55 0.00
 11 7 19 5.76 0.00
 13 7 19 -1.79 0.00
 15 7 19 4.03 0.00
 10 8 19 6.18 0.00
 12 8 19 -2.09 0.00
 14 8 19 3.80 0.00
 9 9 19 5.75 0.00
 11 9 19 8.06 0.00
 13 9 19 2.18 0.00
 15 9 19 1.94 0.00
 10 10 19 6.32 0.00
 12 10 19 1.59 0.00
 14 10 19 7.95 0.00
 9 11 19 -2.71 0.00
 11 11 19 7.90 0.00
 13 11 19 -3.33 0.00
 15 11 19 2.12 0.00
 8 12 19 -4.59 0.00
 10 12 19 1.30 0.00
 12 12 19 -5.61 0.00
 14 12 19 5.36 0.00
 9 13 19 -11.57 0.00
 11 13 19 7.56 0.00
 13 13 19 -13.18 0.00
 8 14 19 -2.60 0.00
 10 14 19 5.81 0.00
 12 14 19 -6.74 0.00
 14 14 19 6.65 0.00
 7 15 19 8.74 0.00
 9 15 19 -8.87 0.00
 11 15 19 8.33 0.00
 13 15 19 -10.22 0.00
 8 16 19 -4.73 0.00
 10 16 19 1.61 0.00
 12 16 19 -6.80 0.00
 14 16 19 7.91 0.00
 7 17 19 2.58 0.00
 9 17 19 -9.95 0.00
 11 17 19 1.65 0.00
 13 17 19 0.33 0.00
 0 18 19 -3.46 0.00
 6 18 19 0.90 0.00
 8 18 19 1.24 0.00
 10 18 19 -0.17 0.00
 12 18 19 -4.30 0.00
 1 19 19 2.93 0.00
 3 19 19 -0.99 0.00
 5 19 19 0.17 0.00
 7 19 19 -3.18 0.00
 9 19 19 -4.21 0.00
 11 19 19 -3.67 0.00
 13 19 19 -2.02 0.00
 0 20 19 -12.31 0.00
 2 20 19 -4.32 0.00
 4 20 19 -9.70 0.00
 6 20 19 -5.02 0.00
 8 20 19 -0.41 0.00
 10 20 19 -5.23 0.00
 12 20 19 -1.85 0.00
 1 21 19 -4.33 0.00
 3 21 19 -1.50 0.00
 5 21 19 9.89 0.00
 7 21 19 3.06 0.00
 9 21 19 6.35 0.00
 11 21 19 3.12 0.00
 0 22 19 0.96 0.00
 2 22 19 4.95 0.00
 4 22 19 -1.46 0.00
 6 22 19 -1.90 0.00
 8 22 19 -0.40 0.00
 10 22 19 -4.10 0.00
 1 23 19 0.91 0.00
 3 23 19 -1.48 0.00
 5 23 19 9.52 0.00
 7 23 19 2.58 0.00
 9 23 19 1.79 0.00
 11 23 19 -0.64 0.00
 0 24 19 2.21 0.00
 2 24 19 4.19 0.00
 4 24 19 -1.62 0.00
 6 24 19 -1.93 0.00
 8 24 19 -4.64 0.00
 10 24 19 -5.41 0.00
 1 25 19 -0.67 0.00
 3 25 19 -9.48 0.00
 5 25 19 6.88 0.00
 7 25 19 3.81 0.00
 9 25 19 3.49 0.00
 0 26 19 -3.60 0.00
 2 26 19 1.33 0.00
 4 26 19 -4.06 0.00
 6 26 19 0.61 0.00
 8 26 19 1.11 0.00
 1 27 19 1.02 0.00
 3 27 19 -8.36 0.00
 5 27 19 7.90 0.00
 7 27 19 -2.46 0.00
 0 28 19 -11.23 0.00
 2 28 19 -3.27 0.00
 4 28 19 -1.54 0.00
 6 28 19 2.60 0.00
 8 28 19 1.99 0.00
 1 29 19 8.26 0.00
 3 29 19 -4.19 0.00
 5 29 19 3.75 0.00
 7 29 19 -4.97 0.00
 0 30 19 2.62 0.00
 2 30 19 -0.76 0.00
 4 30 19 -1.21 0.00
 6 30 19 -0.65 0.00
 1 31 19 3.12 0.00
 3 31 19 -1.52 0.00
 0 32 19 6.59 0.00
 2 32 19 -0.07 0.00
 0 0 20 12.89 0.00
 2 0 20 -5.99 0.00
 4 0 20 13.32 0.00
 6 0 20 -1.80 0.00
 8 0 20 -3.82 0.00
 10 0 20 8.13 0.00
 12 0 20 -3.35 0.00
 14 0 20 -9.22 0.00
 1 1 20 3.25 0.00
 3 1 20 -1.70 0.00
 5 1 20 3.00 0.00
 7 1 20 -8.41 0.00
 9 1 20 -3.09 0.00
 11 1 20 -1.51 0.00
 13 1 20 -6.74 0.00
 0 2 20 9.66 0.00
 2 2 20 -4.63 0.00
 4 2 20 9.84 0.00
 6 2 20 -0.63 0.00
 8 2 20 -0.66 0.00
 10 2 20 6.75 0.00
 12 2 20 -4.69 0.00
 14 2 20 -6.61 0.00
 1 3 20 7.79 0.00
 3 3 20 2.49 0.00
 5 3 20 10.16 0.00
 7 3 20 3.90 0.00
 9 3 20 5.82 0.00
 11 3 20 1.44 0.00
 13 3 20 -2.87 0.00
 0 4 20 5.59 0.00
 6 4 20 -1.48 0.00
 8 4 20 1.97 0.00
 10 4 20 4.66 0.00
 12 4 20 -0.78 0.00
 14 4 20 3.10 0.00
 7 5 20 -4.47 0.00
 9 5 20 3.12 0.00
 11 5 20 -0.29 0.00
 13 5 20 -0.95 0.00
 8 6 20 -0.50 0.00
 10 6 20 0.31 0.00
 12 6 20 -3.87 0.00
 14 6 20 -1.45 0.00
 7 7 20 2.94 0.00
 9 7 20 5.81 0.00
 11 7 20 -1.47 0.00
 13 7 20 -0.71 0.00
 6 8 20 1.19 0.00
 8 8 20 0.59 0.00
 10 8 20 5.85 0.00
 12 8 20 2.71 0.00
 5 9 20 -2.70 0.00
 7 9 20 -0.42 0.00
 9 9 20 2.19 0.00
 11 9 20 -2.20 0.00
 13 9 20 0.80 0.00
 0 10 20 0.77 0.00
 6 10 20 9.30 0.00
 8 10 20 0.50 0.00
 10 10 20 5.10 0.00
 12 10 20 3.82 0.00
 1 11 20 0.33 0.00
 5 11 20 0.11 0.00
 7 11 20 2.95 0.00
 9 11 20 6.01 0.00
 11 11 20 0.42 0.00
 13 11 20 3.47 0.00
 0 12 20 -11.21 0.00
 2 12 20 1.95 0.00
 4 12 20 -15.01 0.00
 6 12 20 -2.26 0.00
 8 12 20 -5.36 0.00
 10 12 20 -1.65 0.00
 12 12 20 -1.47 0.00
 1 13 20 -0.81 0.00
 3 13 20 -2.34 0.00
 5 13 20 -1.49 0.00
 7 13 20 -5.71 0.00
 9 13 20 -1.62 0.00
 11 13 20 -5.46 0.00
 0 14 20 -6.57 0.00
 2 14 20 4.00 0.00
 4 14 20 -8.19 0.00
 6 14 20 1.32 0.00
 8 14 20 -1.85 0.00
 10 14 20 -1.12 0.00
 12 14 20 -0.11 0.00
 1 15 20 2.71 0.00
 3 15 20 1.00 0.00
 5 15 20 5.11 0.00
 7 15 20 -0.32 0.00
 9 15 20 1.45 0.00
 11 15 20 -2.58 0.00
 0 16 20 11.11 0.00
 2 16 20 7.42 0.00
 4 16 20 -0.75 0.00
 6 16 20 4.89 0.00
 8 16 20 -2.30 0.00
 10 16 20 -0.44 0.00
 1 17 20 1.33 0.00
 3 17 20 -1.24 0.00
 5 17 20 1.48 0.00
 7 17 20 2.97 0.00
 9 17 20 0.92 0.00
 11 17 20 0.04 0.00
 0 18 20 -0.17 0.00
 2 18 20 -8.50 0.00
 4 18 20 -4.50 0.00
 6 18 20 2.18 0.00
 8 18 20 -3.05 0.00
 10 18 20 2.24 0.00
 1 19 20 -3.63 0.00
 3 19 20 -6.50 0.00
 5 19 20 -5.76 0.00
 7 19 20 0.62 0.00
 9 19 20 -3.48 0.00
 0 20 20 9.93 0.00
 2 20 20 -0.67 0.00
 4 20 20 6.86 0.00
 6 20 20 2.04 0.00
 8 20 20 -2.57 0.00
 10 20 20 -1.69 0.00
 1 21 20 -2.25 0.00
 3 21 20 -2.32 0.00
 5 21 20 -2.22 0.00
 7 21 20 1.20 0.00
 9 21 20 -4.81 0.00
 0 22 20 6.29 0.00
 2 22 20 -6.93 0.00
 4 22 20 8.23 0.00
 6 22 20 3.05 0.00
 8 22 20 7.99 0.00
 1 23 20 7.52 0.00
 3 23 20 3.86 0.00
 5 23 20 -0.80 0.00
 7 23 20 0.30 0.00
 0 24 20 7.99 0.00
 2 24 20 -5.97 0.00
 4 24 20 9.50 0.00
 6 24 20 0.19 0.00
 1 25 20 1.62 0.00
 3 25 20 0.51 0.00
 5 25 20 0.19 0.00
 7 25 20 -1.78 0.00
 0 26 20 8.19 0.00
 2 26 20 -3.86 0.00
 4 26 20 6.82 0.00
 6 26 20 2.76 0.00
 1 27 20 -1.45 0.00
 3 27 20 -2.30 0.00
 5 27 20 3.52 0.00
 0 28 20 4.57 0.00
 2 28 20 -4.19 0.00
 0 0 0 0.00 0.00
# SQUEEZE RESULTS (Version = 150216)
# Note: Data are Listed for all Voids in the P1 Unit Cell
# i.e. Centre of Gravity, Solvent Accessible Volume,
# Recovered number of Electrons in the Void and
# Details about the Squeezed Material
;
_platon_squeeze_details
;
TITL 3
CELL   21.1937   42.4945   17.8951     90.00     90.00     90.00
SPGR Cmmm
# Solvent Accessible Volume =      6291
# Electrons Found in S.A.V. =      2306
# Note: Atoms in Void as Cxxx and Qxxx all others
C101 1.000 0.057 0.235 !       2.60 eA-3
C102 0.225 0.063 0.504 !       1.54 eA-3
C103 1.000 0.070 0.188 !       1.53 eA-3
C104 0.750 0.094-0.011 !       1.42 eA-3
C105 1.000 0.092 0.160 !       1.34 eA-3
C106 1.000 0.450 0.315 !       1.33 eA-3
C107 0.782 0.015 0.217 !       1.32 eA-3
C108 1.000 0.115 0.156 !       1.30 eA-3
C109 0.202 0.125 0.500 !       1.28 eA-3
C110 0.236 0.086 0.498 !       1.27 eA-3
C111 0.277 0.413 0.035 !       1.25 eA-3
Q112 0.598 0.463 0.168 !       1.24 eA-3
C113 0.294 0.504 0.203 !       1.23 eA-3
C114 0.744 0.082 0.031 !       1.19 eA-3
Q115 0.750 0.436 0.059 !       1.17 eA-3
Q116 0.125 0.018 0.160 !       1.16 eA-3
Q117 0.272 0.462 0.143 !       1.15 eA-3
C118 0.196 0.094-0.006 !       1.15 eA-3
C119 1.000 0.195 0.495 !       1.13 eA-3
C120 0.500 0.341 0.028 !       1.13 eA-3
Q121 0.729 0.037 0.362 !       1.10 eA-3
C122 0.500 0.504 0.047 !       1.07 eA-3
C123 0.971 0.180 0.499 !       1.07 eA-3
C124 0.948 0.203 0.493 !       1.07 eA-3
C125 0.048 0.500 0.500 !       1.06 eA-3
C126 0.763 0.102 0.485 !       1.05 eA-3
C127 0.729 0.443 0.111 !       1.05 eA-3
C128 0.500 0.351 0.076 !       1.04 eA-3
C129 0.810 0.019 0.182 !       1.02 eA-3
C130 0.242 0.470 0.296 !       1.00 eA-3
C131 1.000 0.176 0.490 !       0.99 eA-3
Q132 0.284 0.469 0.109 !       0.98 eA-3
C133 1.000 0.180-0.005 !       0.98 eA-3
Q134 0.646 0.499 0.172 !       0.98 eA-3
C135 1.000 0.022 0.059 !       0.97 eA-3
C136 0.455 0.500 0.047 !       0.97 eA-3
C137 1.000 0.197 0.413 !       0.95 eA-3
C138 0.733 0.494 0.250 !       0.95 eA-3
C139 0.926 0.008-0.001 !       0.95 eA-3
C140 0.410 0.016 0.495 !       0.94 eA-3
C141 1.000 0.240 0.297 !       0.94 eA-3
C142 0.622 0.501 0.015 !       0.94 eA-3
C143 0.500 0.141 0.505 !       0.94 eA-3
Q144 0.059 0.500 0.000 !       0.93 eA-3
C145 1.000 0.160 0.474 !       0.92 eA-3
Q146 0.735 0.044 0.411 !       0.91 eA-3
Q147 0.500 0.048 0.195 !       0.91 eA-3
C148 0.714 0.038 0.391 !       0.90 eA-3
C149 0.700 0.117 0.000 !       0.90 eA-3
C150 0.583 0.483 0.045 !       0.89 eA-3
C151 0.043 0.242 0.315 !       0.88 eA-3
C152 1.000 0.211 0.372 !       0.88 eA-3
C153 0.343 0.500 0.000 !       0.88 eA-3
Q154 0.748 0.467 0.189 !       0.87 eA-3
Q155 0.740 0.498 0.188 !       0.87 eA-3
C156 0.610 0.469 0.093 !       0.87 eA-3
C157 0.299 0.500 0.000 !       0.86 eA-3
C158 0.043 0.088 0.097 !       0.86 eA-3
C159 0.458 0.436 0.111 !       0.85 eA-3
C160 1.000 0.434 0.362 !       0.85 eA-3
C161 0.500 0.366 0.109 !       0.84 eA-3
Q162 0.742 0.500 0.391 !       0.84 eA-3
C163 0.464 0.500 0.000 !       0.83 eA-3
C164 0.836 0.064 0.047 !       0.82 eA-3
Q165 0.174 0.063 0.500 !       0.82 eA-3
Q166 0.391 0.028 0.390 !       0.82 eA-3
Q167 0.751 0.497 0.297 !       0.81 eA-3
Q168 0.527 0.501 0.375 !       0.80 eA-3
Q169 0.436 0.500 0.156 !       0.79 eA-3
Q170 0.234 0.030 0.417 !       0.79 eA-3
C171 0.812 0.053 0.092 !       0.79 eA-3
C172 0.316 0.501 0.047 !       0.78 eA-3
Q173 0.276 0.026 0.223 !       0.78 eA-3
C174 0.635 0.443 0.100 !       0.77 eA-3
C175 0.500 0.195 0.006 !       0.77 eA-3
C176 0.612 0.502 0.094 !       0.77 eA-3
C177 0.500 0.500 0.141 !       0.77 eA-3
C178 1.000 0.257 0.247 !       0.76 eA-3
Q179 0.753 0.012 0.438 !       0.76 eA-3
C180 0.500 0.159 0.469 !       0.75 eA-3
C181 1.000 0.423 0.299 !       0.75 eA-3
C182 0.075 0.495 0.468 !       0.75 eA-3
C183 0.610 0.125 0.496 !       0.75 eA-3
C184 0.508 0.325 0.070 !       0.75 eA-3
Q185 0.214 0.502 0.375 !       0.74 eA-3
C186 0.501 0.241 0.340 !       0.74 eA-3
Q187 0.723 0.029 0.457 !       0.73 eA-3
C188 0.157 0.028 0.080 !       0.72 eA-3
C189 0.433 0.462 0.065 !       0.72 eA-3
Q190 0.278 0.488 0.046 !       0.72 eA-3
C191 0.464 0.460 0.098 !       0.71 eA-3
Q192 0.634 0.497 0.219 !       0.71 eA-3
C193 0.828 0.013 0.079 !       0.71 eA-3
Q194 0.706 0.500 0.375 !       0.71 eA-3
C195 1.001 0.094 0.067 !       0.70 eA-3
C196 0.020 0.435 0.330 !       0.70 eA-3
C197 0.574 0.395 0.061 !       0.70 eA-3
C198 1.000 0.229 0.379 !       0.69 eA-3
C199 0.551 0.298 0.429 !       0.69 eA-3
;
loop_
  _refln_index_h
  _refln_index_k
  _refln_index_l
  _refln_F_squared_meas
  _refln_F_squared_sigma
 0 0 2 719.73 9.3
 0 0 3 6.3 1.2
 0 0 10 211.08 11.4
 0 0 11 2444.26 39.2
 0 0 12 4.6 2.5
 0 0 13 302.97 16.3
 0 0 14 -0.7 2.1
 0 0 15 -5.2 4.1
 0 0 16 -2.1 2.9
 0 0 17 45.7 6.5
 0 0 18 136.99 11.1
 0 2 2 1675.23 13.4
 0 2 3 96.39 4
 0 2 4 237.78 7.3
 0 2 5 1903.11 23.3
 0 2 6 275.87 9.8
 0 -2 9 2821.22 37.8
 0 2 9 2854.21 37.1
 0 2 10 116.19 8.5
 0 -2 10 135.19 8.9
 0 -2 11 2240.78 37.4
 0 2 11 2258.17 36.9
 0 2 12 11.1 3
 0 -2 12 10.4 3.5
 0 2 13 264.87 14.3
 0 -2 13 269.97 14.3
 0 -2 14 -1.9 2.8
 0 2 14 -1.3 2.8
 0 -2 15 55.79 6.6
 0 2 15 37.7 6.6
 0 -2 16 1.6 2.1
 0 2 16 2.5 2.1
 0 2 17 1.3 1.9
 0 -2 17 -1 2.3
 0 2 18 86.09 9.3
 0 -2 18 90.29 8.9
 0 -2 19 24.8 5.4
 0 4 1 59.19 2.1
 0 4 2 4512.25 23.1
 0 4 3 4.1 0.9
 0 4 4 4318.87 31.3
 0 4 5 545.15 12.3
 0 4 6 1703.43 24.9
 0 4 7 83.49 6.1
 0 4 9 3658.13 42.6
 0 -4 9 3697.83 43.1
 0 4 10 104.09 8
 0 -4 10 127.59 8.4
 0 4 11 492.15 17.3
 0 -4 11 495.75 17.8
 0 4 12 23.9 4.1
 0 -4 12 20.2 4.3
 0 4 13 12.5 3.6
 0 -4 13 19.9 4.1
 0 -4 14 10.4 2.8
 0 4 14 11 3.3
 0 -4 15 371.86 17.9
 0 4 15 356.96 17.4
 0 -4 16 118.59 10.2
 0 4 16 123.89 11
 0 -4 17 33.9 5.8
 0 4 17 27.2 5.9
 0 -4 18 -1.5 2.1
 0 -4 19 133.59 10.2
 0 6 1 47.1 2.3
 0 6 2 952.5 11.6
 0 6 3 54.89 3.2
 0 6 4 2407.26 23.7
 0 6 5 2195.88 25.7
 0 6 6 732.53 16
 0 6 7 775.82 18.2
 0 6 8 74.59 6.2
 0 6 9 1498.25 27.4
 0 6 10 151.78 9.4
 0 -6 10 175.58 10.4
 0 6 11 223.88 11.8
 0 -6 11 227.58 12.2
 0 6 12 19.2 4.1
 0 -6 12 25.3 4.6
 0 6 13 268.37 14.5
 0 -6 13 304.97 15.3
 0 6 14 96.09 9.3
 0 -6 14 94.19 9
 0 -6 15 1089.29 30.4
 0 6 15 901.11 29.1
 0 6 16 405.76 19.5
 0 -6 16 423.56 19.3
 0 -6 17 298.27 16.3
 0 -6 18 76.19 7.9
 0 -6 19 28.7 4.8
 0 -6 20 51.99 6
 0 8 1 61.79 2.9
 0 8 2 1752.02 17.3
 0 8 3 1561.54 17.9
 0 8 4 47.2 3.5
 0 8 5 1184.18 19.1
 0 8 6 1782.32 25.7
 0 8 7 994.3 20.7
 0 8 8 215.58 10.6
 0 -8 9 11.3 2.7
 0 8 9 11.7 3
 0 8 9 9.6 2.2
 0 -8 10 109.59 8.4
 0 8 10 85.99 7.1
 0 8 11 898.01 23.5
 0 -8 11 854.81 24.3
 0 -8 12 -0.7 1.7
 0 8 12 0.2 1.3
 0 -8 13 480.05 19.3
 0 8 13 401.26 18.3
 0 8 14 251.07 14.3
 0 -8 14 254.17 14.7
 0 -8 15 1601.44 37.7
 0 8 15 1606.84 37.7
 0 -8 16 620.64 24
 0 -8 17 45.4 6.4
 0 -8 18 0.7 1.7
 0 -8 19 0.1 1.7
 0 -8 20 26.6 4.2
 0 10 1 46.3 3.1
 0 10 2 44.7 3.1
 0 10 3 45.2 3.4
 0 10 4 2297.97 25.7
 0 10 5 3113.69 32.1
 0 10 6 3746.63 38.5
 0 10 7 4037.3 43.5
 0 10 8 346.47 13.6
 0 10 8 353.26 12.7
 0 -10 9 270.17 12.5
 0 10 9 273.47 13.3
 0 10 9 271.17 11.8
 0 -10 10 336.57 14.7
 0 10 10 314.97 13.3
 0 10 11 253.77 12.7
 0 -10 11 255.27 13.7
 0 10 12 21.4 4.5
 0 -10 12 20.2 4.3
 0 -10 13 359.26 16.9
 0 10 13 343.07 16.4
 0 -10 14 175.98 13.1
 0 -10 15 1401.36 35.1
 0 -10 16 207.08 13.9
 0 -10 17 123.89 10.5
 0 -10 18 35.4 5.4
 0 -10 19 -1.5 1.9
 0 12 0 2474.45 21.5
 0 12 1 300.67 8
 0 12 2 60.39 3.8
 0 12 3 473.55 11.6
 0 12 4 463.25 12
 0 12 5 2632.74 31.1
 0 12 6 2311.47 31.3
 0 12 7 3703.73 43.3
 0 -12 8 5 1.9
 0 12 8 4.5 1.9
 0 12 8 9.4 2
 0 12 9 1373.56 30.6
 0 12 9 1320.47 26.7
 0 12 10 153.98 11.3
 0 12 10 160.98 9.9
 0 -12 10 165.48 10.5
 0 -12 11 279.17 14.4
 0 12 11 277.37 14.1
 0 -12 12 16.8 4.2
 0 -12 13 1.6 2.1
 0 -12 14 222.48 13.9
 0 -12 15 292.97 16.5
 0 -12 16 245.08 15.2
 0 -12 17 93.69 9
 0 -12 18 4 2.3
 0 -12 19 -0.1 1.7
 0 14 0 2973.8 26.4
 0 14 1 730.53 13.5
 0 14 2 580.54 12.6
 0 14 3 113.79 6.1
 0 14 4 369.06 11.3
 0 14 5 712.03 17.2
 0 14 6 2519.45 34.5
 0 14 7 100.89 7.3
 0 -14 7 82.49 6.4
 0 -14 8 139.39 8.9
 0 14 8 126.69 8.8
 0 14 9 625.94 21
 0 -14 9 550.34 18.1
 0 14 10 523.55 21
 0 -14 10 616.64 20.4
 0 -14 11 392.66 17
 0 -14 12 41.2 5.7
 0 -14 13 7.1 3.2
 0 -14 14 -0.9 3
 0 -14 15 341.37 17.8
 0 -14 16 119.49 11.1
 0 -14 17 1.4 2.1
 0 -14 18 4.5 1.9
 0 -14 19 63.19 6.6
 0 16 0 1650.33 21.3
 0 16 1 986.2 16.9
 0 16 2 744.33 15.5
 0 16 3 25.3 3.1
 0 16 4 255.47 10.1
 0 16 5 1078.49 22.2
 0 -16 6 3.6 1.2
 0 16 6 6.6 2
 0 16 6 5.7 1.9
 0 16 7 59.09 5.8
 0 -16 7 47.2 5.1
 0 16 8 220.08 12.1
 0 -16 8 259.47 12.3
 0 -16 9 1226.78 27.8
 0 16 9 1477.85 33.3
 0 -16 10 576.74 20
 0 16 10 478.15 20.8
 0 16 11 1069.59 32.8
 0 -16 11 1023.3 27.8
 0 -16 12 51.99 6.6
 0 -16 13 69.59 8.3
 0 -16 14 60.39 7.5
 0 -16 15 96.79 9.3
 0 -16 16 25.1 4.8
 0 -16 17 -3.2 2.9
 0 -16 18 79.59 7.8
 0 -16 19 84.99 7.4
 0 18 0 2613.34 29.1
 0 18 -1 421.16 11.5
 0 18 1 409.96 11.9
 0 18 2 47 4.3
 0 18 3 15.9 2.7
 0 18 4 224.18 10.1
 0 18 5 103.89 7.2
 0 18 5 101.89 6.7
 0 18 6 137.69 8.7
 0 -18 6 122.29 7.7
 0 18 6 128.99 7.8
 0 -18 7 137.29 8.7
 0 18 7 142.49 9.4
 0 18 8 278.07 14.3
 0 -18 8 330.07 14.1
 0 -18 9 1074.19 26.6
 0 18 9 1310.67 32.4
 0 18 10 889.01 29.1
 0 -18 10 990.6 26.7
 0 -18 11 332.27 16.1
 0 18 11 345.57 19.2
 0 -18 12 152.88 11.4
 0 -18 14 29.5 5
 0 -18 15 115.39 10.3
 0 -18 16 78.49 8.6
 0 -18 17 -1.4 2.7
 0 -18 18 71.59 7.3
 0 20 0 2589.44 31.9
 0 20 1 1087.89 21
 0 20 -1 1067.49 20.1
 0 20 2 10.3 2.4
 0 20 3 521.65 15.9
 0 -20 3 455.75 14.3
 0 20 4 36.8 4.4
 0 20 4 43.1 4.6
 0 -20 4 30.3 3.8
 0 20 5 482.65 16.3
 0 20 5 481.15 15.3
 0 20 6 395.66 14
 0 -20 6 447.56 15.1
 0 20 6 429.86 16.4
 0 20 7 41.4 5.3
 0 -20 7 38.7 4.8
 0 20 8 232.88 13.6
 0 -20 8 272.67 13.1
 0 -20 9 539.45 19.2
 0 20 9 613.14 23.2
 0 -20 10 376.66 16.7
 0 20 10 290.07 17
 0 -20 11 501.75 20.3
 0 -20 12 2.6 2.1
 0 -20 13 48.6 6.5
 0 -20 14 48.6 6.8
 0 -20 15 203.98 13.8
 0 -20 16 98.79 9.3
 0 -20 17 6.1 2.2
 0 -20 18 49.1 5.7
 0 22 0 2273.97 32.4
 0 22 1 880.41 20.4
 0 22 -1 822.22 18.9
 0 -22 2 20.6 3.2
 0 22 2 20.6 3.1
 0 22 2 20.6 3.4
 0 22 -2 24.3 3.4
 0 22 3 837.22 21.4
 0 22 3 864.41 20.9
 0 22 4 1482.45 29.8
 0 22 4 1525.75 28
 0 22 5 754.62 21.8
 0 22 5 751.72 19.8
 0 22 6 681.83 21.8
 0 -22 6 748.73 20.5
 0 -22 7 163.88 10.1
 0 22 7 222.08 12.9
 0 -22 8 0 1.4
 0 22 8 -1.9 2.1
 0 22 9 201.68 13.7
 0 -22 9 156.88 10.9
 0 -22 10 194.28 12.2
 0 -22 11 69.89 7.6
 0 -22 12 157.38 11.9
 0 -22 13 13.1 3.3
 0 -22 14 146.79 11.6
 0 -22 15 234.18 14.5
 0 -22 16 139.09 10.8
 0 -22 17 41.5 5.5
 0 -22 18 -0.3 1.4
 0 24 0 972.1 22.7
 0 24 -1 589.24 17.5
 0 24 1 567.24 18
 0 24 1 576.84 17.8
 0 24 -2 0.8 1
 0 24 2 0.8 0.9
 0 24 2 3.2 2
 0 -24 2 1.5 1.4
 0 24 3 1010 25.1
 0 -24 3 948.61 22.8
 0 24 4 1551.34 29.6
 0 24 4 1500.05 31.4
 0 24 5 2793.62 44.2
 0 24 5 2730.63 39.3
 0 24 6 902.41 26.5
 0 -24 6 1026 24.8
 0 -24 7 558.04 19.3
 0 24 7 720.63 24.3
 0 -24 8 51.99 6.1
 0 24 8 42.8 6.3
 0 -24 9 109.19 9.5
 0 -24 10 74.29 7.8
 0 -24 11 10.7 2.7
 0 -24 12 37.1 5.6
 0 -24 13 5.4 2.1
 0 -24 14 287.67 16.1
 0 -24 15 209.48 13.3
 0 -24 16 224.98 13.4
 0 -24 17 111.99 8.8
 0 26 0 267.87 12.7
 0 -26 1 210.98 10.8
 0 26 -1 220.38 11.7
 0 26 1 215.08 11.6
 0 26 1 197.08 11.2
 0 26 -2 23.7 3.9
 0 26 2 25.9 4.2
 0 26 2 26.2 4.3
 0 -26 2 22.1 3.8
 0 26 -3 586.64 18.9
 0 -26 3 602.54 19.1
 0 26 3 697.53 22.1
 0 26 3 753.12 21.4
 0 26 4 1017.7 25
 0 26 4 1067.59 28
 0 -26 5 2120.79 37.6
 0 26 5 2423.26 43.3
 0 -26 6 2201.28 38.5
 0 26 6 1854.21 40
 0 -26 7 262.87 13.8
 0 26 7 286.07 16.2
 0 -26 8 6.8 3
 0 -26 9 37.7 6
 0 -26 10 179.98 12.2
 0 -26 11 0.2 2.2
 0 -26 12 144.69 11.2
 0 -26 13 93.59 9.7
 0 -26 14 105.99 9.9
 0 -26 15 342.37 16.9
 0 -26 16 326.27 15.6
 0 -26 17 80.19 7.1
 0 28 0 169.18 11.1
 0 28 1 89.59 8.1
 0 28 1 81.29 7.5
 0 -28 1 76.89 7.1
 0 28 -1 75.29 7.3
 0 28 2 23 4.2
 0 28 -2 25.9 4.4
 0 -28 2 24.4 4
 0 28 2 31 4.8
 0 28 3 425.86 18.5
 0 28 -3 390.96 16.6
 0 -28 3 414.36 16.5
 0 -28 4 700.93 22.3
 0 28 -4 743.53 23.2
 0 -28 5 1446.96 32.4
 0 28 5 1479.15 36.2
 0 -28 6 542.35 20.2
 0 -28 7 124.09 10.1
 0 -28 8 19.5 4.2
 0 -28 9 148.09 11.3
 0 -28 10 281.47 15.5
 0 -28 11 14.1 3.6
 0 -28 12 16.4 3.5
 0 -28 13 96.49 9.4
 0 -28 14 393.56 18.3
 0 -28 15 169.78 11.5
 0 -28 16 264.87 13.4
 0 30 0 166.98 11.7
 0 -30 0 141.89 9.8
 0 30 -1 565.04 21.3
 0 -30 1 601.74 20.4
 0 30 1 547.85 21.5
 0 30 -2 38.9 5.7
 0 -30 2 35.7 5.3
 0 30 2 32.4 5.2
 0 -30 3 144.79 10.3
 0 30 3 158.88 12
 0 30 -3 126.19 10.5
 0 30 -4 384.16 17.9
 0 -30 4 405.86 17.8
 0 30 -5 108.79 9.8
 0 -30 5 114.09 9.4
 0 30 -6 76.59 8.3
 0 -30 6 79.29 8.2
 0 -30 7 174.88 12.1
 0 -30 8 51.09 6.7
 0 -30 9 179.98 12.7
 0 -30 10 547.05 22.1
 0 -30 11 79.79 8.7
 0 -30 12 64.29 7.5
 0 -30 13 11.9 2.8
 0 -30 14 329.97 16.3
 0 -30 15 160.68 10.8
 0 -30 16 43.4 5.3
 0 32 0 505.05 21.8
 0 -32 0 451.15 18.6
 0 32 1 889.01 29.5
 0 32 -1 867.11 28.2
 0 -32 -1 935.01 25.5
 0 -32 1 934.21 26.7
 0 32 2 80.69 8.8
 0 -32 2 98.29 8.8
 0 32 -2 95.59 9.7
 0 32 -3 14.7 4
 0 -32 3 21.3 4.5
 0 -32 4 35.1 5.8
 0 32 -4 29.7 5.5
 0 32 -5 12.5 3.8
 0 -32 5 8.4 2.4
 0 -32 6 380.26 18.3
 0 32 -6 363.96 19.3
 0 32 -7 17.3 4.6
 0 -32 7 15.9 3.9
 0 -32 8 143.59 11.3
 0 -32 9 296.57 16.2
 0 -32 10 1216.58 33
 0 -32 11 135.99 11.3
 0 -32 12 219.78 14.1
 0 -32 14 54.69 6.4
 0 -32 15 47.7 5.7
 0 34 0 376.26 20.2
 0 -34 0 354.46 17.2
 0 -34 -1 1764.12 36.8
 0 -34 1 1776.22 37.8
 0 -34 2 100.69 9.2
 0 -34 -2 84.69 8.1
 0 34 -2 85.39 9.6
 0 -34 3 796.32 26.5
 0 -34 -3 743.03 22.9
 0 34 -4 9.4 3.7
 0 -34 4 8 2.5
 0 34 -5 380.46 20.7
 0 -34 5 465.85 20.7
 0 -34 6 152.08 11.9
 0 -34 7 6.6 2.3
 0 -34 8 307.17 17
 0 -34 9 262.27 15.4
 0 -34 10 1352.16 34.6
 0 -34 11 131.19 11.2
 0 -34 12 351.06 17.1
 0 -34 14 2.2 1.7
 0 -36 0 244.58 14.8
 0 -36 1 1503.55 35.6
 0 -36 -1 1513.95 34.9
 0 -36 -2 309.07 15.9
 0 -36 2 371.76 18.8
 0 -36 3 149.19 11.4
 0 -36 -3 133.19 9.9
 0 -36 4 58.09 7.2
 0 -36 5 153.48 12.2
 0 -36 6 243.58 15
 0 -36 7 1.2 2.3
 0 -36 8 213.48 14
 0 -36 9 151.28 11.7
 0 -36 10 1104.59 30.8
 0 -36 11 61.59 7.5
 0 -36 12 373.96 17.4
 0 -38 0 80.79 8.9
 0 -38 1 2071.19 43.6
 0 -38 -1 1941.31 39.7
 0 -38 2 9.9 3.5
 0 -38 -2 9.1 3.1
 0 -38 3 180.68 12.8
 0 -38 4 136.09 11.5
 0 -38 5 208.58 13.9
 0 -38 6 72.29 8.5
 0 -38 7 8.6 3.1
 0 -38 8 90.19 8.8
 0 -38 9 83.09 8.8
 0 -38 10 589.54 22.3
 0 -38 11 18.4 4.3
 0 -38 13 1.7 2
 0 -40 0 78.09 9
 0 -40 -1 297.37 16.1
 0 -40 1 298.07 16.1
 0 -40 2 4.5 2.3
 0 -40 -2 3.2 1.7
 0 -40 3 252.17 15.5
 0 -40 4 223.28 14.6
 0 -40 5 433.46 20.3
 0 -40 6 206.38 14.1
 0 -40 7 15.9 3.8
 0 -40 8 22.9 4.8
 0 -40 9 31.7 5.4
 0 -40 10 175.98 11.5
 0 -40 11 0.2 1.3
 0 -42 0 9 3.1
 0 -42 -1 58.79 7
 0 -42 1 68.29 7.9
 0 -42 2 11.2 3.6
 0 -42 3 328.17 17
 0 -42 4 205.78 13.9
 0 -42 5 606.64 23.5
 0 -42 6 392.96 18.5
 0 -42 7 38.3 5.6
 0 -42 8 3.4 2
 0 -42 9 0.8 1.7
 0 -42 10 44.2 5.6
 0 -44 0 2.2 1.8
 0 -44 1 21.6 4.6
 0 -44 2 5.5 2.5
 0 -44 3 280.07 15.3
 0 -44 4 221.48 13.7
 0 -44 5 559.24 21.2
 0 -44 6 317.17 15.8
 0 -44 7 99.29 8.7
 0 -44 8 9.3 2.7
 0 -44 9 1.7 1.2
 0 -46 1 106.99 8.8
 0 -46 2 2 1.5
 0 -46 3 92.99 8.2
 0 -46 4 92.09 8.2
 0 -46 5 253.47 13.5
 0 -46 6 228.88 12.7
 0 -46 7 78.29 7.1
 1 -1 1 9999 28.3
 1 -1 2 67.09 3.1
 1 1 2 68.39 2.9
 1 1 3 8.4 1.3
 1 -1 3 5.7 1.3
 1 1 4 156.98 6.1
 1 1 5 588.04 13.3
 1 1 6 118.79 6.6
 -1 -1 9 351.76 13.4
 -1 1 9 357.06 13.5
 1 -1 10 2601.84 38.2
 1 1 10 2622.24 37.7
 -1 1 10 2535.65 38
 1 1 11 20.9 4.3
 -1 1 11 27.2 4.5
 1 -1 11 25 4.3
 -1 -1 11 22.8 4.2
 -1 -1 12 1225.98 29.3
 1 -1 12 1204.08 28.6
 -1 1 12 1284.07 29.5
 1 -1 13 9.2 3.2
 -1 1 13 11.6 2.8
 1 1 13 7.4 2.7
 -1 -1 13 14.6 3.9
 -1 -1 14 26.8 4.9
 -1 1 14 34.6 5.2
 1 1 14 31.3 5.2
 1 -1 14 33.6 5.3
 1 1 15 -1.1 2.3
 -1 -1 15 -1.9 3.5
 -1 1 15 -3.9 3.5
 1 -1 15 -1.6 2.6
 -1 1 16 -16.1 4
 -1 -1 16 -15.5 4
 1 -1 16 -10.4 3.3
 1 1 16 -11.2 3.4
 -1 1 17 16.2 3.8
 1 1 17 14.1 3.6
 -1 -1 17 11.2 4
 1 -1 17 13.4 3.4
 1 1 18 62.49 7.9
 -1 -1 18 70.89 8.1
 -1 1 18 75.99 8.2
 1 -1 18 55.99 7.3
 -1 -1 19 148.39 10.8
 1 3 0 28.6 1.3
 1 3 1 5601.74 22.7
 -1 3 1 6058.49 16.5
 1 3 2 204.58 5.2
 -1 3 2 216.18 4.5
 1 3 3 76.69 3.7
 -1 3 3 75.19 3.3
 1 3 4 198.38 7.2
 -1 3 4 200.38 6.7
 -1 3 5 1125.79 17.4
 1 3 5 1093.39 18.1
 1 3 6 700.33 16.2
 1 3 7 12.8 2.5
 -1 3 9 378.46 13.5
 -1 -3 9 412.36 14.4
 1 -3 10 1554.24 29.9
 -1 -3 10 1616.44 30.4
 -1 3 10 1579.74 29.3
 1 3 10 1558.74 29.6
 -1 3 11 14.8 3.2
 1 -3 11 19.6 3.7
 -1 -3 11 16.9 3.6
 1 3 11 17.1 3.4
 -1 -3 12 400.66 17
 -1 3 12 409.86 16.4
 1 -3 12 368.46 16.5
 1 3 12 390.46 16.2
 -1 -3 13 6.1 2.7
 -1 3 13 5.1 2.3
 1 3 13 6.2 2.1
 1 -3 13 5.8 2.9
 1 -3 14 24.8 4.7
 -1 -3 14 27.5 4.3
 1 3 14 22.4 4.4
 -1 3 14 18.7 4.2
 1 3 15 18.4 4.5
 1 -3 15 7.5 3
 -1 -3 15 12.5 3.6
 -1 3 15 7.3 2.8
 1 -3 16 69.19 7.7
 -1 3 16 51.89 7.7
 -1 -3 16 44 7.9
 1 3 16 49.7 7.7
 1 3 17 1.5 1.9
 1 -3 17 -1.2 2.4
 -1 -3 17 -1.8 2.6
 -1 3 17 2.4 1.9
 1 -3 18 17.4 4.1
 -1 -3 18 21.2 4.6
 -1 3 18 25.1 4.6
 -1 -3 19 148.29 11.5
 1 -3 19 140.09 10.5
 1 5 1 426.66 6.9
 -1 5 1 455.75 5.6
 -1 5 2 86.79 3
 1 5 2 82.79 3.7
 1 5 3 80.49 3.9
 -1 5 3 73.59 3.3
 -1 5 4 588.14 11.1
 1 5 4 577.44 11.9
 1 5 5 1011.4 17.7
 -1 5 5 957.4 15.8
 -1 5 6 755.62 16.1
 1 5 6 781.72 16.9
 1 5 7 75.89 5.7
 1 5 8 270.27 11.9
 -1 5 9 262.07 11.4
 1 5 9 255.47 11
 1 -5 9 234.98 11.4
 1 -5 10 905.61 23.3
 -1 -5 10 951.9 23.8
 1 5 10 885.41 22.2
 -1 5 10 942.01 22.5
 -1 -5 11 11.6 3
 -1 5 11 9 2.2
 1 5 11 9.9 2.6
 1 -5 11 11.7 3
 -1 5 12 13.2 3.8
 -1 -5 12 18 3.4
 1 -5 12 15.1 3.4
 1 5 12 16.8 3.6
 1 5 13 3.4 1.8
 1 -5 13 3.2 1.7
 -1 -5 13 3.4 2
 -1 5 13 4 2.3
 -1 -5 14 387.46 17.9
 -1 5 14 364.76 16.9
 1 -5 14 356.96 17.2
 1 5 14 363.46 16.8
 1 5 15 135.49 10.8
 1 -5 15 115.29 10.5
 -1 5 15 141.29 11.1
 -1 -5 15 121.59 10.7
 -1 -5 16 447.16 20.1
 1 -5 16 430.56 19.3
 1 5 16 417.66 19.5
 -1 5 16 441.46 20.2
 -1 -5 17 64.29 7.7
 1 -5 17 50.49 6.8
 -1 5 17 63.49 8.3
 1 -5 18 10.3 3.1
 -1 -5 18 6.2 2.6
 -1 -5 19 129.59 10.1
 1 -5 19 108.59 9.1
 -1 -5 20 10.8 2.8
 1 7 0 9.3 1.1
 1 7 1 4 0.8
 -1 7 1 4.3 0.7
 -1 7 2 113.89 3.9
 1 7 2 104.79 4.4
 1 7 3 1578.34 18.3
 -1 7 3 1594.34 16.7
 -1 7 4 30.1 2.6
 1 7 4 30.1 2.9
 1 7 5 1450.25 21.3
 -1 7 5 1400.06 20.1
 -1 7 6 1048.8 18.9
 1 7 6 1114.69 20.9
 -1 7 7 536.05 14.9
 1 7 7 532.05 15.4
 1 7 8 49.6 5.2
 1 7 9 10 2.6
 -1 7 9 12.4 2.6
 1 7 9 12.1 3.5
 1 -7 9 16.9 3.3
 1 -7 10 568.44 19.5
 -1 7 10 561.44 17.6
 -1 -7 10 611.74 19.7
 1 7 10 618.04 18.5
 1 -7 11 28.9 4.6
 -1 7 11 25.4 4.1
 -1 -7 11 26.1 4.4
 1 7 11 29.7 4.2
 1 -7 12 53.89 6.2
 1 7 12 42 5.8
 -1 7 12 52.69 6
 -1 -7 12 51.99 6.5
 1 -7 13 15.2 3.9
 -1 -7 13 16.1 3.8
 1 7 13 14.8 3.9
 -1 7 13 11.3 3.7
 1 -7 14 825.02 26.5
 -1 -7 14 881.51 27.4
 1 7 14 867.81 26.3
 -1 7 14 828.32 26.2
 1 7 15 387.66 18.7
 1 -7 15 339.97 18.3
 -1 -7 15 419.26 19.2
 -1 7 15 384.06 19.2
 1 -7 16 821.62 26.3
 -1 -7 16 876.91 28.4
 -1 7 16 853.41 27.7
 -1 -7 17 78.99 9
 1 -7 17 83.09 8.4
 1 -7 18 1.4 1.4
 -1 -7 18 1.2 2
 -1 -7 19 14.4 3.6
 1 -7 19 14.7 3.5
 -1 -7 20 2.5 1.4
 1 -7 20 2.6 1.8
 1 9 0 72.49 3.3
 1 9 1 65.39 3.3
 -1 9 1 66.39 3
 -1 9 2 55.29 3
 1 9 2 47.6 3.2
 -1 9 3 1911.61 19.4
 1 9 3 1739.73 21.6
 1 9 4 1357.86 20
 -1 9 4 1422.86 18.5
 -1 9 5 1928.71 23.7
 1 9 5 1895.81 25.3
 1 9 6 2293.37 30.3
 -1 9 6 2240.88 28.3
 1 9 7 992.5 22
 -1 9 7 986.8 20.4
 1 9 8 616.84 18.1
 -1 9 8 591.64 17.4
 1 9 9 15.8 3.1
 1 -9 9 19.9 3.3
 -1 -9 9 15.8 3.1
 -1 9 9 17.9 3
 1 9 9 19.5 4.1
 -1 9 10 362.46 14.4
 1 -9 10 395.46 16.3
 -1 -9 10 398.16 16
 1 9 10 417.96 15.2
 1 9 10 408.86 18
 -1 -9 11 32.4 4.9
 -1 9 11 31 4.7
 1 9 11 33.5 5.1
 -1 -9 11 31.8 5.3
 1 -9 11 33.3 5.2
 -1 9 12 7 2.8
 -1 -9 12 6.8 2.5
 1 9 12 7.9 2.7
 1 -9 12 5.3 2.4
 1 9 13 46.7 6.7
 -1 -9 13 46.2 6.6
 1 -9 13 41.8 5.9
 -1 9 13 42.7 6.4
 -1 -9 14 936.41 28.6
 -1 9 14 939.91 27.5
 1 9 14 945.61 27.9
 1 -9 15 432.66 19.2
 -1 -9 15 381.36 20.4
 -1 -9 16 573.84 22.7
 1 -9 16 551.74 21.8
 -1 -9 17 75.69 8.5
 1 -9 17 74.19 7.8
 1 -9 18 24.4 4.6
 -1 -9 18 24.7 4.5
 -1 -9 19 -0.5 1.8
 1 -9 19 -3 2.1
 -1 -9 20 0.6 1.5
 1 11 0 210.58 6.3
 1 11 1 785.82 12.6
 -1 11 1 739.63 11.4
 1 11 2 12.8 1.9
 -1 11 2 12.2 1.7
 1 11 3 382.26 10.2
 -1 11 3 411.66 9.9
 1 11 4 596.84 13.8
 -1 11 4 629.54 13.1
 1 11 5 2022.8 27.5
 -1 11 5 2007 25.4
 1 11 6 2398.26 32.1
 -1 11 6 2407.56 30.7
 -1 11 7 1869.31 28.9
 1 11 7 1911.51 31.5
 1 11 8 224.68 11.7
 1 11 8 197.68 10.2
 -1 11 8 213.58 10.7
 -1 11 8 203.68 9.9
 1 -11 8 201.38 10.2
 -1 -11 9 84.29 7
 1 11 9 58.39 6.6
 1 -11 9 80.19 6.8
 -1 11 9 70.39 6.8
 -1 11 9 60.39 6.1
 1 11 9 71.09 6.3
 1 11 10 352.96 17.2
 -1 -11 10 327.67 14.8
 1 11 10 346.37 14.3
 -1 11 10 318.37 13.6
 1 -11 10 340.87 14.8
 1 11 11 32.9 5.3
 -1 11 11 34.2 5
 1 -11 11 32.4 4.7
 -1 -11 11 33.7 4.9
 -1 -11 12 3.6 2.8
 1 -11 12 0.1 1.5
 -1 11 12 2 2.1
 -1 11 13 25.4 5
 1 -11 13 19.2 4.4
 -1 -11 13 20.9 4.7
 -1 -11 14 540.05 21.9
 1 -11 14 552.04 21.4
 1 -11 15 205.78 13.9
 -1 -11 15 214.38 14.6
 1 -11 16 270.77 15.3
 -1 -11 16 268.87 15.8
 -1 -11 17 97.99 9.8
 1 -11 17 95.89 8.8
 1 -11 18 2.9 1.6
 -1 -11 18 0.3 1.8
 1 -11 19 0.2 1.2
 -1 -11 19 -1.6 2
 1 13 0 925.71 14.5
 -1 13 1 1274.37 16.5
 1 13 1 1310.47 17.9
 1 13 2 9.1 1.8
 -1 13 2 11.1 1.8
 -1 13 3 362.06 10
 1 13 3 350.06 10.7
 1 13 4 209.58 8.6
 -1 13 4 241.58 8.6
 1 13 5 1155.68 21.8
 -1 13 5 1170.88 20.3
 -1 13 6 2991.6 35.1
 1 13 6 2985.1 37.3
 -1 13 7 513.05 15.8
 1 13 7 530.05 16.9
 1 13 8 33 4
 1 -13 8 32.9 4.1
 -1 13 8 35.8 4.6
 -1 -13 8 35.3 4.5
 1 13 8 36.3 5
 1 13 9 197.68 11.9
 -1 13 9 189.68 11.4
 1 -13 9 232.48 11.8
 -1 -13 9 242.88 11.9
 -1 -13 10 704.03 21.9
 1 -13 10 669.73 20.9
 1 13 10 724.93 25.2
 -1 -13 11 94.09 8.3
 1 13 11 75.39 9.1
 1 -13 11 95.19 8.3
 1 -13 12 30.5 5.2
 -1 -13 12 25.8 4.7
 1 -13 13 1.6 2.2
 -1 -13 13 4.2 2
 -1 -13 14 29.2 5.7
 1 -13 14 37.7 5.6
 1 -13 15 101.59 10
 -1 -13 15 107.39 10
 1 -13 16 175.78 12.4
 -1 -13 16 181.78 13.4
 1 -13 17 16.2 3.9
 -1 -13 17 16.6 3.5
 -1 -13 18 1.6 1.6
 1 -13 18 1.2 1.7
 1 -13 19 14.9 3.1
 -1 -13 19 18.3 3.6
 1 15 0 824.72 14.7
 -1 15 0 829.92 14.1
 -1 15 1 1727.53 21
 1 15 1 1786.62 22.7
 -1 15 2 121.99 5.8
 1 15 2 122.69 6.3
 1 15 3 12 2.3
 -1 15 3 14.6 2.3
 -1 15 4 196.58 8.3
 1 15 4 176.38 8.4
 -1 15 5 546.65 14.7
 1 15 5 526.05 15.4
 -1 15 6 236.38 10.3
 1 15 6 230.08 10.8
 1 15 7 19.3 2.8
 -1 -15 7 18.6 3
 -1 15 7 20.9 3.3
 1 -15 7 19.5 3.3
 1 15 7 20.3 3.4
 1 -15 8 237.88 11.5
 1 15 8 269.57 11.4
 -1 -15 8 245.98 11.8
 -1 15 8 281.57 13
 1 -15 9 354.66 14.7
 -1 15 9 303.67 14.6
 -1 -15 9 378.46 15.3
 1 15 9 295.57 15.1
 1 15 10 1001.2 30
 -1 -15 10 897.31 24.9
 -1 15 10 987 28.3
 1 -15 10 880.01 24.3
 1 15 11 244.18 15.9
 1 -15 11 265.67 14
 -1 -15 11 274.57 14.5
 -1 -15 12 119.49 10
 -1 -15 13 2.6 2.1
 1 -15 13 0.2 1.7
 1 -15 14 15.7 3.5
 -1 -15 14 9.8 4
 -1 -15 15 65.99 8.5
 1 -15 15 69.89 7.9
 -1 -15 16 49 6.8
 1 -15 16 44.4 6.3
 1 -15 17 -1.6 2.7
 -1 -15 17 -0.4 2
 -1 -15 18 31 5.3
 1 -15 18 31.1 4.9
 1 -15 19 81.59 7
 -1 -15 19 101.99 8.3
 1 17 0 659.03 14.4
 -1 17 0 673.63 13.9
 1 17 1 723.73 15.6
 -1 17 1 700.03 14.7
 -1 17 2 132.49 6.7
 1 17 2 133.99 7.1
 -1 17 3 19.5 2.8
 1 17 3 16.3 2.9
 -1 17 4 68.89 5.2
 1 17 4 63.99 5.6
 -1 17 5 6.4 2
 1 17 5 5.6 1.7
 -1 -17 6 10.3 2.3
 1 17 6 11.6 2.6
 1 -17 6 10.1 2.2
 -1 17 6 11.1 2.6
 1 17 6 13 2.5
 1 17 7 52.29 4.9
 -1 17 7 53.79 5.4
 1 -17 7 64.59 5.9
 -1 -17 7 70.99 6.2
 1 17 7 54.29 5.9
 1 -17 8 474.85 16.6
 1 17 8 614.54 21.2
 -1 -17 8 477.15 16.8
 -1 17 8 578.34 19.4
 1 17 8 525.45 16.3
 1 -17 9 581.74 19
 1 17 9 519.55 20.8
 -1 17 9 523.55 19.5
 1 -17 10 1049.2 27
 -1 -17 10 1025.1 27
 1 17 10 1183.58 33.3
 -1 17 10 1124.39 31.2
 -1 -17 11 289.07 15.3
 1 -17 11 282.47 14.6
 1 -17 12 161.08 11.8
 -1 -17 12 163.18 11.8
 -1 -17 13 5.9 3.5
 1 -17 13 1.6 2.5
 -1 -17 14 20 4.4
 1 -17 14 19.8 3.9
 -1 -17 15 39.6 6.3
 1 -17 15 37.5 5.9
 1 -17 16 23.2 4.5
 -1 -17 16 23 4.7
 -1 -17 17 -2.3 2.9
 1 -17 17 -1.5 2.4
 1 -17 18 58.49 6.4
 -1 -17 18 60.79 7
 -1 -17 19 181.48 10.6
 -1 19 0 974 18.2
 1 19 0 982.5 19.3
 -1 19 -1 704.73 15.3
 1 19 -1 688.03 15.9
 -1 19 1 673.33 15.5
 1 19 1 669.43 16.1
 -1 19 2 3.6 1.2
 1 19 2 2.7 1.6
 -1 19 3 28.1 3.4
 1 19 3 25.8 3.6
 1 -19 4 2.4 1.5
 1 19 4 4.1 1.8
 -1 -19 4 3.9 1.8
 1 19 4 2.8 1.3
 1 19 5 18 3
 1 19 5 19.8 3.4
 -1 -19 5 17.7 3.3
 -1 19 5 19.9 3.4
 1 -19 5 19.9 3.2
 -1 19 6 69.49 6.3
 1 19 6 73.29 6.9
 -1 -19 6 58.89 5.6
 1 -19 6 57.59 5.4
 1 19 6 67.99 5.7
 1 19 7 14.2 2.8
 -1 -19 7 16.2 3.1
 1 19 7 17.7 3.1
 -1 19 7 13.1 2.7
 1 -19 7 18.9 3.5
 -1 19 8 402.86 16.8
 -1 -19 8 314.97 14.1
 1 -19 8 324.77 14.1
 1 19 8 422.26 18.3
 -1 19 9 521.85 20.2
 1 -19 9 578.14 19.1
 1 19 9 517.45 22
 1 -19 10 700.13 22.6
 -1 -19 10 697.43 22.5
 1 -19 11 215.98 12.9
 -1 -19 11 230.48 13.7
 1 -19 12 132.09 10.7
 -1 -19 12 136.59 10.7
 -1 -19 13 -2.3 3.3
 -1 -19 14 10.9 3.4
 1 -19 14 16.9 3.9
 -1 -19 15 67.39 8.2
 1 -19 15 62.49 7.6
 -1 -19 16 67.89 8
 1 -19 16 65.99 7.5
 1 -19 17 -1.8 2.5
 -1 -19 17 -2.1 2.6
 -1 -19 18 42 5.6
 1 -19 18 33.1 4.8
 1 21 0 1362.36 24.5
 -1 21 0 1378.76 23.9
 1 21 -1 738.13 17.4
 -1 21 1 660.63 16.5
 -1 21 -1 776.92 17.5
 1 21 1 664.73 17.4
 1 21 2 17.9 3.1
 1 21 -2 16.4 2.8
 -1 21 2 20.8 3.1
 -1 21 3 240.18 10.9
 1 21 3 227.78 11.1
 -1 -21 3 257.77 10.7
 -1 21 3 242.18 10.9
 1 21 3 236.38 10.7
 1 -21 3 265.07 11.1
 1 21 4 303.17 12.2
 1 -21 4 262.77 11.5
 -1 -21 4 257.97 11.3
 1 21 4 276.57 12.8
 -1 21 4 290.27 12.2
 -1 21 4 301.37 12.4
 1 -21 5 277.07 12.1
 1 21 5 236.28 12.1
 -1 -21 5 259.17 11.4
 -1 21 5 245.48 11.7
 1 21 5 234.18 10.7
 -1 21 6 309.57 13.7
 1 21 6 289.77 12.2
 -1 -21 6 245.08 11.8
 1 21 6 311.07 14.9
 1 -21 6 247.38 11.9
 1 21 7 104.99 9
 1 21 7 86.19 6.9
 -1 -21 7 107.79 8
 -1 21 7 98.09 8.1
 1 -21 7 106.29 7.9
 -1 21 8 118.49 9.4
 1 -21 8 95.79 8
 -1 -21 8 95.59 7.8
 1 21 8 115.29 10.1
 -1 -21 9 155.38 10.8
 1 -21 9 153.68 10.2
 1 21 9 128.99 11.4
 1 -21 10 203.98 12.5
 -1 -21 10 206.78 12.6
 -1 -21 11 184.18 12.4
 1 21 11 151.28 13.7
 1 -21 11 185.88 12.3
 1 -21 12 47.2 6.4
 -1 -21 12 49 6.7
 -1 -21 13 -1.8 3.1
 1 -21 14 50.19 6.7
 -1 -21 14 49.99 7.2
 1 -21 15 138.99 11
 -1 -21 15 145.99 11.9
 -1 -21 16 96.09 9.2
 1 -21 16 102.89 9.1
 1 -21 17 0.7 1.4
 -1 -21 17 1.4 2
 -1 -21 18 0.2 1.8
 1 -21 18 0.5 1.2
 -1 23 0 976.8 21.5
 1 23 0 953 21.9
 -1 23 -1 415.76 13.8
 1 23 1 387.96 14.4
 1 -23 1 387.56 13.6
 -1 23 1 374.66 13.5
 1 23 1 359.76 13.8
 1 23 -1 419.76 14.5
 1 23 2 5 1.8
 -1 23 -2 5.3 1.8
 1 -23 2 4 1.5
 1 23 -2 4.3 1.6
 1 23 2 5.3 1.9
 -1 23 2 6.9 2.5
 -1 23 2 3.2 1.6
 -1 -23 3 506.55 16.1
 1 23 3 477.75 15.9
 1 -23 3 517.35 16.4
 -1 23 3 471.65 16.2
 1 23 3 453.25 16.8
 -1 23 3 471.85 16.2
 1 23 4 1540.35 32.2
 -1 -23 4 1333.97 26.7
 -1 23 4 1512.75 29.5
 1 23 4 1588.84 28.9
 1 -23 4 1349.07 27.3
 1 23 5 980.8 26.2
 -1 -23 5 1110.79 24.7
 -1 23 5 973 24.7
 1 23 5 923.81 22.2
 1 -23 5 1088.39 24.8
 1 23 6 720.23 19.9
 1 -23 6 623.54 19.7
 -1 23 6 760.82 22.6
 1 23 6 771.12 24.6
 -1 -23 6 587.94 19.2
 -1 -23 7 345.77 14.9
 1 23 7 274.47 12.4
 -1 23 7 290.47 14.5
 1 23 7 299.27 15.9
 1 -23 7 338.87 14.6
 1 -23 8 18.5 4
 1 23 8 19.8 4.1
 -1 -23 8 20.8 4.1
 1 -23 9 31.2 5
 1 23 9 25.8 5.2
 -1 -23 9 33.3 5.5
 -1 -23 10 47.4 6.6
 1 23 10 55.09 8.1
 1 -23 10 44.7 5.9
 -1 -23 11 25.6 4.7
 1 -23 11 24.8 4.3
 -1 -23 12 22.4 4.2
 1 -23 12 23.5 4.3
 -1 -23 13 22.4 4.6
 -1 -23 14 124.59 11
 1 -23 14 128.09 10.6
 1 -23 15 189.28 12.5
 -1 -23 15 193.68 13.4
 -1 -23 16 167.08 12
 1 -23 16 162.18 11.2
 1 -23 17 34.1 4.9
 -1 -23 17 38.5 5.3
 -1 -23 18 1.8 1.5
 1 25 0 424.36 15.8
 1 25 0 401.86 15.4
 -1 25 0 417.26 15.1
 1 -25 1 164.78 9.6
 1 25 1 163.78 10
 1 25 -1 185.68 10.5
 1 25 1 159.08 9.5
 -1 25 -1 184.88 10.1
 -1 25 1 157.28 9.3
 -1 25 -2 44.9 5.2
 1 -25 2 51.59 5.4
 -1 25 2 50.59 5.5
 1 25 -2 41.4 4.8
 1 25 2 52.59 5.7
 1 25 2 48.4 5.7
 -1 -25 2 48.2 5
 1 25 3 365.96 14.4
 1 -25 3 390.36 15.3
 1 25 3 351.46 15.7
 -1 25 3 354.06 14.8
 1 25 -3 423.16 15.7
 -1 -25 3 407.86 15.3
 1 25 4 1592.14 34.7
 -1 -25 4 1414.46 28.9
 1 25 4 1645.94 30.5
 1 -25 4 1456.25 30.2
 -1 25 4 1651.43 32.6
 1 25 5 1513.75 34.8
 -1 25 5 1558.74 33.2
 1 -25 5 1805.82 33.4
 -1 -25 5 1826.62 33.2
 1 25 5 1484.65 29.5
 1 -25 6 1142.19 27.8
 -1 -25 6 1093.49 26.8
 1 25 6 1391.06 34.8
 -1 25 6 1266.97 30.8
 1 25 6 1290.07 27.7
 -1 -25 7 645.84 21.2
 1 -25 7 656.53 21.1
 1 25 8 32.2 5.6
 -1 -25 8 29.3 5.2
 1 -25 8 28.8 5.1
 1 25 9 38.8 6.6
 1 -25 9 40.9 5.6
 -1 -25 9 42.4 6.4
 -1 -25 10 32 5.6
 1 -25 10 31.1 5
 -1 -25 11 -2.4 2.8
 1 -25 11 -1.6 2.8
 -1 -25 12 33.2 5.3
 1 -25 12 32.4 5.2
 -1 -25 13 98.69 9.9
 1 -25 14 101.79 9.4
 -1 -25 14 100.09 9.8
 1 -25 15 289.67 15.3
 -1 -25 15 299.77 16.1
 1 -25 16 226.98 12.9
 -1 -25 16 231.98 13.4
 1 -25 17 76.19 6.9
 -1 -25 17 87.39 7.8
 1 27 0 211.68 11.3
 -1 27 0 208.68 11.6
 1 27 0 219.18 12.2
 1 -27 0 215.88 11.3
 1 27 1 13.5 3.3
 1 -27 1 16 3.4
 -1 27 1 13 2.9
 -1 27 -1 16.7 3.2
 1 27 -1 18.5 3.4
 1 27 1 13.1 3
 1 27 2 77.89 7.6
 1 -27 2 70.49 6.7
 -1 -27 2 64.89 6.3
 -1 27 2 81.29 7.5
 1 27 -2 61.29 6.5
 1 27 2 78.99 7.1
 -1 27 -2 58.69 6.2
 -1 27 3 233.38 12.9
 1 27 -3 289.57 13.8
 1 27 3 222.98 11.9
 1 -27 3 253.27 12.7
 -1 -27 3 248.78 12.4
 -1 27 -3 284.97 13.7
 1 27 3 222.18 13.2
 1 -27 4 1154.78 28.2
 1 27 4 1208.58 31.7
 1 27 -4 1027.9 26.4
 1 27 4 1267.97 27.9
 -1 -27 4 1073.49 26.3
 -1 27 4 1183.18 29.3
 1 -27 5 1184.58 28.2
 1 27 5 970.1 24.7
 -1 -27 5 1216.18 29.1
 1 27 5 963.7 29
 -1 -27 6 929.01 25.5
 1 -27 6 1028.5 27.5
 -1 -27 7 325.37 15.8
 1 -27 7 325.37 15.5
 1 -27 8 -0.1 2.1
 -1 -27 8 2.3 2.4
 1 -27 9 57.09 7
 -1 -27 9 62.39 7.6
 1 -27 10 44.2 6
 -1 -27 10 44.8 6.4
 -1 -27 11 1.2 1.9
 1 -27 11 0.8 2.5
 1 -27 12 42.8 6.3
 -1 -27 12 41.4 5.9
 -1 -27 13 168.48 12.7
 -1 -27 14 131.09 11
 1 -27 14 127.19 10.2
 -1 -27 15 334.77 16.7
 1 -27 15 326.87 15.8
 -1 -27 16 188.08 11.7
 1 -27 16 175.38 10.9
 -1 -27 17 51.39 5.7
 1 29 0 183.58 12.2
 1 -29 0 199.28 11.5
 -1 29 0 188.88 11.9
 1 29 1 57.69 7
 -1 29 -1 58.69 6.5
 1 29 -1 48.6 6.2
 -1 29 1 54.09 6.4
 -1 -29 1 45.4 5.5
 1 -29 1 46.3 5.7
 1 29 1 49.2 6
 1 -29 -1 48.4 5.4
 1 -29 2 9.3 2.7
 -1 -29 2 8 2.6
 -1 29 2 6.2 2
 1 29 2 10.8 3
 1 29 2 5 2.4
 -1 29 -2 6.6 2.2
 1 29 -2 6.4 2
 1 29 3 116.49 9
 1 -29 3 136.49 10
 1 29 -3 137.59 10.6
 -1 29 3 108.79 9.5
 1 29 3 117.19 10.2
 -1 29 -3 142.19 10.3
 -1 -29 3 132.69 9.6
 1 -29 4 615.84 21.3
 1 29 4 643.94 24.3
 1 29 4 657.23 20.7
 -1 -29 4 587.34 20.4
 1 29 -4 545.15 20.7
 -1 29 -4 531.15 20.3
 -1 -29 5 407.96 17.9
 1 -29 5 396.06 17.5
 1 29 -5 406.96 18.1
 -1 29 -5 397.46 17.6
 1 -29 6 154.78 11.1
 1 29 6 154.68 12.8
 -1 -29 6 139.09 10.3
 1 29 -6 134.59 10.7
 1 -29 7 119.99 9.8
 -1 -29 7 115.79 9.7
 1 -29 8 1.3 1.9
 -1 -29 8 1.1 2.1
 -1 -29 9 268.97 15.7
 1 -29 9 248.38 14.4
 1 -29 10 84.29 8.7
 -1 -29 10 85.99 8.7
 -1 -29 11 72.09 8.1
 1 -29 11 66.59 7.6
 -1 -29 12 -1.3 2.9
 1 -29 12 -0.3 3.5
 -1 -29 13 152.68 11.8
 -1 -29 14 151.88 11.6
 1 -29 14 145.79 10.7
 -1 -29 15 250.57 13.9
 1 -29 15 255.87 13.4
 1 -29 16 62.69 6.2
 -1 -29 16 67.39 6.8
 -1 31 0 795.12 25.7
 1 31 0 855.61 27.8
 -1 -31 0 859.91 24.2
 -1 31 -1 165.18 11.9
 1 -31 1 140.29 10.2
 1 31 1 148.89 11.8
 1 31 1 133.89 10
 1 31 -1 175.78 12.5
 1 -31 -1 133.39 9.8
 -1 -31 1 144.69 10.3
 -1 31 1 132.19 10.6
 1 -31 -2 85.99 7.6
 1 -31 2 88.69 8.2
 1 31 2 78.49 8.8
 1 31 2 88.59 8
 1 31 -2 83.59 8.6
 -1 31 -2 81.19 8.3
 -1 -31 2 91.79 8.4
 1 31 3 10.9 3.3
 -1 31 -3 15.2 3.7
 1 31 -3 17.1 3.9
 1 -31 -3 14.1 3.1
 1 -31 3 14.8 3.6
 -1 -31 3 16 3.6
 1 -31 4 73.49 7.6
 1 31 4 64.99 8
 -1 31 -4 68.49 7.6
 -1 -31 4 80.39 8.1
 1 31 -4 67.99 8.1
 1 31 5 8.9 3.2
 -1 31 -5 13 3.7
 -1 -31 5 11.1 2.8
 1 -31 5 10.7 2.6
 1 31 -5 11.4 3.5
 1 31 -6 79.09 8.9
 -1 31 -6 73.59 8.4
 -1 -31 6 79.79 8.3
 1 -31 6 85.19 8.6
 1 -31 7 62.59 7.6
 -1 -31 7 64.59 7.8
 1 31 -7 62.19 8.1
 1 31 -8 53.59 7.6
 -1 -31 8 47.9 6.4
 1 -31 8 52.49 7
 -1 -31 9 450.35 20.3
 1 -31 9 445.06 19.5
 -1 -31 10 160.38 12.2
 1 -31 10 154.58 12
 1 -31 11 423.06 19.2
 -1 -31 11 448.66 20.3
 -1 -31 12 10.9 3.3
 1 -31 12 5.2 1.7
 -1 -31 13 19.3 4.5
 -1 -31 14 30.7 5.2
 1 -31 14 32.1 5.1
 -1 -31 15 136.09 9.8
 1 -31 15 127.29 9.1
 -1 -33 0 1752.12 36.3
 1 -33 0 1760.52 36.3
 1 33 0 1643.54 41.4
 -1 -33 -1 215.48 12.8
 1 33 1 246.38 16.4
 1 -33 -1 227.88 13.3
 -1 -33 1 262.37 14.5
 -1 33 -1 253.87 15.5
 1 33 -1 290.77 17.2
 1 -33 1 251.67 14.2
 -1 -33 2 357.36 16.7
 1 33 2 301.37 18
 1 -33 -2 347.47 15.8
 1 33 -2 314.57 17.9
 -1 33 -2 290.77 16.5
 1 -33 2 359.76 17.3
 1 -33 3 69.39 7.6
 -1 -33 3 70.19 7.7
 -1 33 -3 64.89 7.9
 1 33 -3 74.89 8.8
 1 33 3 53.89 7.7
 -1 -33 4 81.29 8.5
 1 -33 4 71.29 7.8
 1 33 -4 68.49 8.6
 -1 33 -4 63.69 8.1
 -1 33 -5 32.1 5.9
 1 -33 5 44.2 6.4
 -1 -33 5 43.2 6.3
 1 33 -5 41.8 7
 1 -33 6 143.99 11.4
 1 33 -6 123.89 11.5
 -1 -33 6 151.98 11.6
 -1 -33 7 13.5 4.4
 1 -33 7 7.9 3.3
 -1 -33 8 91.29 9.4
 1 -33 8 90.59 9.2
 -1 -33 9 809.92 27.2
 1 -33 9 814.52 26.9
 1 -33 10 205.28 14
 -1 -33 10 213.28 14
 -1 -33 11 676.63 24.6
 1 -33 11 664.73 24
 -1 -33 12 46.2 6.5
 1 -33 12 38.3 5.8
 -1 -33 13 34.1 5.3
 1 -33 14 -0.8 1.5
 -1 -33 14 -0.4 1.3
 -1 -33 15 23.3 4.1
 1 -35 0 2072.79 40.6
 -1 -35 0 2083.19 41.2
 -1 -35 -1 188.58 12.4
 1 -35 -1 191.38 12.3
 1 35 -1 224.88 16.2
 1 35 1 185.68 15.2
 1 -35 1 218.48 14
 -1 -35 1 211.18 13.6
 -1 -35 2 950 28.2
 -1 -35 -2 924.41 26.4
 1 -35 -2 960.7 26.8
 1 -35 2 941.31 28.6
 1 -35 3 98.29 9.3
 -1 -35 3 106.09 10.2
 -1 -35 -3 86.09 8.1
 1 35 -3 91.89 10.4
 1 -35 4 -1.6 3.6
 1 35 -4 0.5 1.9
 -1 -35 4 1 3
 -1 -35 5 110.39 10.1
 1 -35 5 116.19 10.6
 -1 -35 6 78.29 8.8
 1 -35 6 74.89 8.7
 1 -35 7 5.5 2.6
 -1 -35 7 4.8 2.8
 -1 -35 8 103.29 10
 1 -35 8 95.79 9.3
 1 -35 9 801.82 26.9
 -1 -35 9 758.12 25.8
 1 -35 10 152.98 12
 -1 -35 10 155.08 12.2
 1 -35 11 754.92 25
 -1 -35 11 756.82 25.7
 1 -35 12 37.3 5.7
 -1 -35 12 33.2 5.7
 1 -35 14 1.6 1.6
 -1 -35 14 3.4 1.9
 -1 -37 0 1612.14 36.8
 1 -37 0 1645.44 37.6
 -1 -37 -1 181.28 12.9
 1 -37 1 192.18 13.3
 1 -37 -1 163.08 11.9
 -1 -37 1 200.28 13.7
 1 -37 -2 627.04 21.8
 1 -37 2 660.03 23.8
 -1 -37 -2 651.63 22.8
 -1 -37 2 696.43 25.5
 1 -37 3 -1.2 3.6
 -1 -37 3 -2.4 2.9
 -1 -37 -3 3.9 1.9
 1 -37 4 122.69 10.9
 -1 -37 -4 121.49 9.7
 -1 -37 4 119.59 10.5
 -1 -37 5 82.69 9.2
 1 -37 5 81.79 9
 1 -37 6 77.89 8.7
 -1 -37 6 69.09 8.3
 1 -37 7 -0.9 2.9
 -1 -37 7 1 2.3
 1 -37 8 52.49 7.2
 -1 -37 8 47.3 6.8
 -1 -37 9 425.76 19.3
 1 -37 9 454.05 20.1
 1 -37 10 79.89 8.6
 -1 -37 10 79.89 8.5
 1 -37 11 506.95 20
 -1 -37 11 498.85 20
 -1 -37 12 5.6 2.3
 -1 -37 13 37.1 5.2
 1 -37 13 33.9 4.7
 -1 -39 0 1273.77 33.3
 1 -39 0 1286.97 32.5
 1 -39 1 28.2 5.4
 -1 -39 1 41.3 6.6
 -1 -39 -1 37.1 6.2
 1 -39 -1 35 5.6
 -1 -39 -2 2 1.8
 1 -39 2 4 2.2
 -1 -39 2 3.5 1.9
 -1 -39 3 50.69 6.8
 -1 -39 -3 46.4 6.2
 1 -39 3 46.5 6.7
 -1 -39 4 256.47 15.8
 1 -39 4 251.07 15.2
 1 -39 5 127.49 11.3
 -1 -39 5 130.39 11.4
 1 -39 6 70.19 8.3
 -1 -39 6 72.29 8.5
 1 -39 7 23 4.6
 -1 -39 7 18.3 4
 1 -39 8 8.3 2.8
 -1 -39 8 6.1 2.1
 -1 -39 9 243.28 14.4
 1 -39 9 242.58 14.4
 -1 -39 10 21.1 4.5
 1 -39 10 20.7 4.4
 1 -39 11 141.29 10.3
 -1 -39 11 138.09 10.1
 -1 -39 12 -2.5 2.3
 -1 -41 0 323.57 17.1
 1 -41 0 318.47 16.5
 -1 -41 -1 10.2 3.6
 -1 -41 1 5.6 2.6
 1 -41 1 7.6 2.9
 1 -41 2 50.59 6.8
 -1 -41 2 51.29 6.9
 -1 -41 -2 60.19 7
 -1 -41 3 60.19 7.8
 1 -41 3 65.29 8
 1 -41 4 432.46 20.1
 -1 -41 4 415.76 19.7
 1 -41 5 292.37 16.7
 -1 -41 5 294.77 16.7
 -1 -41 6 231.98 14.6
 1 -41 6 218.98 13.8
 1 -41 7 39.4 5.9
 -1 -41 7 36.3 5.8
 1 -41 8 0 2.2
 -1 -41 8 0.9 1.6
 1 -41 9 40.5 5.5
 -1 -41 9 41.3 5.8
 -1 -41 10 1.4 1.5
 1 -41 10 1.2 1.4
 -1 -41 11 8.3 2.5
 -1 -43 0 18.1 4
 1 -43 0 14.8 3.7
 1 -43 1 1.2 2.3
 -1 -43 1 0 1.8
 -1 -43 -1 -1.3 1.8
 -1 -43 -2 48.5 6.2
 -1 -43 2 52.39 6.9
 1 -43 2 46.2 6.4
 -1 -43 3 54.39 7.2
 1 -43 3 53.09 7
 -1 -43 4 457.45 20
 1 -43 4 470.35 20
 1 -43 5 323.97 16.3
 -1 -43 5 331.17 17.3
 -1 -43 6 265.67 15
 1 -43 6 260.27 14.8
 1 -43 7 101.79 9.1
 -1 -43 7 109.49 9.3
 1 -43 8 0.5 2.3
 -1 -43 8 4.2 1.8
 -1 -43 9 5.1 2.1
 1 -43 9 4.4 1.6
 1 -43 10 -2.1 1.7
 -1 -43 10 -2.8 1.8
 -1 -45 0 70.69 7.7
 1 -45 1 2.1 1.8
 -1 -45 1 2.9 2.3
 -1 -45 -1 -1.1 1.7
 1 -45 2 14 3.5
 -1 -45 2 19.8 4.2
 1 -45 3 30 5.1
 -1 -45 3 35.9 5.6
 1 -45 4 299.47 14.9
 -1 -45 4 297.67 15.6
 -1 -45 5 195.18 12.4
 1 -45 5 211.28 12.6
 -1 -45 6 211.48 12.5
 1 -45 6 219.08 12.7
 1 -45 7 160.38 10.6
 -1 -45 7 165.18 10.8
 1 -45 8 11.7 2.7
 -1 -45 8 13.5 3.2
 -1 -47 1 10.3 3.1
 -1 -47 2 15.6 3.6
 -1 -47 3 11.9 3
 1 -47 3 5.5 1.8
 -1 -47 4 98.39 8.1
 1 -47 4 84.09 7.3
 -1 -47 5 101.69 8.4
 1 -47 5 92.39 7.7
 2 0 0 1675.03 9
 2 0 1 288.17 5.2
 2 0 2 1400.96 14.3
 2 0 3 63.79 3.6
 2 0 4 318.27 9
 2 0 5 19.7 2.6
 2 0 6 14.4 2.8
 -2 0 9 1082.89 23
 2 0 10 76.79 6.5
 -2 0 10 67.39 6.4
 -2 0 11 1333.17 29
 2 0 11 1367.26 29
 -2 0 12 7.4 3.1
 2 0 12 5.2 2.6
 -2 0 13 451.15 19.1
 2 0 13 471.25 18.3
 2 0 14 14.9 3.6
 -2 0 14 12.6 3.4
 -2 0 15 11.3 1.9
 2 0 15 11.2 3
 2 0 16 12.3 3.3
 -2 0 16 7.8 3.4
 2 0 17 11.2 3.2
 -2 0 17 19 4.1
 -2 0 18 110.39 10
 2 0 18 87.19 9
 -2 0 19 18.8 4.5
 2 2 0 8698.23 25.2
 2 -2 1 18.4 1.5
 2 2 1 14.9 1.3
 2 2 2 945.91 12
 2 -2 2 998.3 13.1
 2 2 3 256.77 7.1
 2 -2 3 255.27 7.7
 2 2 4 746.83 13.9
 2 2 5 27.2 3.1
 2 2 6 48 4.4
 2 2 7 102.59 7.2
 -2 2 9 1429.96 26.6
 -2 -2 9 1415.56 26.8
 -2 -2 10 78.79 6.8
 2 -2 10 77.79 6.5
 -2 2 10 65.69 6.1
 2 -2 11 615.64 20.4
 2 2 11 649.74 20.2
 -2 -2 11 645.34 20.6
 -2 2 11 687.93 20.2
 -2 2 12 5.3 2.3
 -2 -2 12 6.7 2.8
 2 -2 12 4.4 2.4
 2 2 12 4.3 1.9
 2 2 13 94.29 8.4
 -2 -2 13 97.59 8.6
 2 -2 13 86.99 8.3
 -2 2 13 91.09 8.6
 2 -2 14 0.2 2
 2 2 14 1.6 1.6
 -2 2 14 -0.2 3
 -2 -2 14 0.4 2.4
 -2 2 15 -0.2 2.8
 2 2 15 3 1.8
 2 -2 15 0.3 1.9
 -2 -2 15 0.6 3.1
 2 2 16 -2.2 2.6
 2 -2 16 -2.7 2.5
 -2 2 16 -0.8 3.3
 -2 -2 16 -9.1 3.2
 2 -2 17 34.7 5.5
 -2 2 17 38.6 5.8
 -2 -2 17 26.8 5.7
 2 2 17 35.5 5.5
 -2 2 18 42.7 6.3
 2 -2 18 32.5 5.1
 -2 -2 18 37.8 6.4
 -2 -2 19 71.19 7.6
 2 4 0 842.62 8.8
 2 4 1 94.99 3.6
 -2 4 2 272.97 4.6
 2 4 2 274.27 6.6
 2 4 3 18.7 2
 -2 4 3 15.6 1.5
 -2 4 4 323.47 8
 2 4 4 342.07 9.6
 2 4 5 327.47 10.4
 2 4 6 5.2 1.5
 2 4 7 13.6 2.5
 2 4 8 200.28 10.6
 -2 -4 9 491.75 15.9
 -2 4 9 474.45 15.4
 2 -4 10 28.3 4.2
 -2 -4 10 27.9 4.1
 -2 4 10 28.9 4.1
 2 4 10 24.6 4.1
 -2 4 11 193.38 10.9
 -2 -4 11 211.68 11.6
 2 -4 11 203.58 11.4
 2 4 11 201.78 11
 2 4 12 1.2 1.4
 2 -4 12 1.2 1.3
 -2 -4 12 2.5 1.8
 -2 4 12 2.5 1.3
 2 4 13 0.6 1.5
 -2 4 13 -0.5 1.9
 -2 -4 13 0.1 1.9
 2 -4 13 1 1.6
 -2 4 14 12 3.6
 -2 -4 14 10.5 2.9
 2 4 14 8.6 2.9
 2 -4 14 10.4 3.4
 2 4 15 76.19 8.3
 -2 4 15 81.69 8.9
 2 -4 15 85.69 8.5
 -2 -4 15 93.69 9.1
 2 4 16 23.9 5.1
 2 -4 16 19.2 4.1
 -2 4 16 21.9 4.5
 -2 -4 16 17.7 4.6
 2 -4 17 9.8 3.1
 -2 -4 17 11.6 3.5
 -2 4 17 9.4 3.5
 2 -4 18 71.59 7.4
 -2 -4 18 71.39 7.9
 2 -4 19 5.7 2.4
 -2 -4 19 4.2 2.3
 -2 -4 20 54.79 6.2
 2 6 0 13 1.3
 -2 6 1 32 1.4
 2 6 1 30.2 2.1
 2 6 2 456.05 9
 -2 6 2 453.35 6.5
 -2 6 3 278.57 6.2
 2 6 3 269.37 7.8
 2 6 4 295.97 9.1
 -2 6 4 292.77 7.4
 2 6 5 14.9 2.4
 -2 6 5 15.3 2.1
 -2 6 6 411.06 11.4
 2 6 6 411.96 13.2
 2 6 7 94.99 6.7
 2 6 8 17 3.2
 2 6 9 171.28 9.5
 -2 6 9 190.48 9.7
 -2 -6 10 0.9 1.6
 -2 -6 10 4.7 2.1
 2 -6 10 3.1 1.8
 2 6 10 4.2 1.9
 -2 6 10 3.4 1.5
 2 6 11 1.2 1.2
 -2 -6 11 1.4 1.2
 2 -6 11 2.8 1.4
 -2 6 11 1.5 1.3
 2 6 12 2.8 1.9
 -2 6 12 1.9 1.6
 -2 -6 12 3.7 2
 2 -6 12 2.8 1.5
 -2 -6 13 166.28 11.6
 2 6 13 159.78 11.1
 -2 6 13 155.38 10.9
 2 -6 13 151.38 10.7
 -2 6 14 26 5.6
 2 -6 14 22.5 4.8
 -2 -6 14 25.4 5
 2 6 14 26.8 5.3
 -2 -6 15 481.25 20.7
 -2 6 15 504.75 20.6
 2 -6 15 419.56 19.3
 2 6 15 441.46 19.3
 -2 6 16 181.98 13.3
 -2 -6 16 179.68 13
 -2 -6 17 8.3 3.4
 2 -6 17 6.3 2.6
 -2 6 17 7.4 3.5
 -2 -6 18 6.2 2.7
 2 -6 18 4 1.7
 -2 -6 19 0.2 1.6
 2 -6 19 1.8 1.8
 -2 -6 20 8.1 2.6
 2 8 0 7.8 1.4
 2 8 1 125.19 4.6
 -2 8 1 113.69 3.4
 -2 8 2 551.04 8.2
 2 8 2 522.75 10.5
 2 8 3 207.18 7.2
 -2 8 3 220.68 5.9
 2 8 4 2392.86 26.8
 -2 8 4 2321.77 22.1
 -2 8 5 253.87 8
 2 8 5 244.68 9.3
 -2 8 6 541.45 13.2
 2 8 6 566.74 15.1
 -2 8 7 742.93 17.2
 2 8 7 791.72 19.6
 2 8 8 121.49 8.3
 -2 8 8 121.79 7.2
 2 8 9 24.4 3.8
 2 -8 9 24.2 3.6
 -2 8 9 20.5 3.6
 2 8 9 22.8 4.2
 2 8 10 2.8 1.9
 2 8 10 4.1 3
 -2 8 10 1.7 1.6
 -2 -8 10 2.1 1.4
 2 8 11 143.19 9.9
 2 -8 11 145.79 9.9
 -2 -8 11 141.09 10.2
 -2 8 11 157.38 9.9
 2 -8 12 -0.1 1.5
 2 8 12 2.3 1.5
 -2 -8 12 -1.2 2
 -2 8 12 2.1 2.3
 -2 8 13 405.36 17.3
 -2 -8 13 407.06 18.2
 2 -8 13 390.26 17.2
 2 8 13 353.46 17.1
 2 8 14 100.99 9.6
 2 -8 14 105.19 9.4
 -2 -8 14 93.29 10.2
 -2 8 14 106.39 10.3
 -2 -8 15 597.14 24.1
 2 -8 15 578.44 21.9
 -2 8 15 621.24 23
 -2 -8 16 86.59 9.6
 -2 8 16 83.89 10.6
 2 -8 16 102.19 9.3
 2 -8 17 133.09 10.2
 -2 -8 17 171.88 12.4
 -2 -8 18 5.7 2.5
 2 -8 18 5.1 2.1
 2 -8 19 1.8 1.5
 -2 -8 19 1.2 1.3
 -2 -8 20 4.5 2
 2 10 0 202.88 6.5
 2 10 1 48.3 3.1
 -2 10 1 40.7 2.5
 2 10 2 4.2 1.3
 -2 10 2 5.7 1
 -2 10 3 172.08 5.7
 2 10 3 165.28 6.7
 2 10 4 1038.8 18.2
 -2 10 4 1020.2 15.3
 2 10 5 597.34 15
 -2 10 5 592.64 13
 2 10 6 508.45 14.9
 -2 10 6 479.95 12.7
 2 10 7 915.31 21.7
 -2 10 7 859.41 19
 -2 10 8 119.59 7.7
 2 10 8 113.49 8.5
 2 -10 8 137.09 8.4
 -2 10 8 120.19 7.3
 -2 -10 9 30.5 4.4
 2 -10 9 35 4.5
 -2 10 9 31.6 4.1
 2 10 9 39.8 5.3
 2 10 9 37.3 4.4
 2 -10 10 22.9 3.9
 2 10 10 20.4 4.2
 2 10 10 19.1 4.5
 -2 -10 10 26 4.3
 -2 10 10 21 3.7
 2 10 11 1.7 1.7
 2 -10 11 2.2 2.2
 -2 -10 11 -0.9 1.5
 -2 10 11 1.5 1.9
 2 -10 12 15.4 3.7
 2 10 12 21.5 4.3
 -2 10 12 12.8 3.8
 -2 -10 12 17.7 4
 -2 10 13 161.18 11.3
 2 -10 13 147.99 10.8
 -2 -10 13 145.79 11.7
 -2 -10 14 103.89 10
 2 -10 14 97.29 9.2
 -2 -10 15 235.38 15.1
 2 -10 15 236.98 13.8
 2 -10 16 198.88 12.8
 -2 -10 16 188.98 14.2
 2 -10 17 57.79 7.1
 -2 -10 17 77.39 8.6
 -2 -10 18 11.8 3.1
 2 -10 18 7.2 2.5
 -2 -10 19 4.6 1.7
 2 -10 19 2.9 1.4
 -2 -10 20 -1 1.7
 2 12 0 270.27 7.7
 -2 12 1 76.49 3.8
 2 12 1 76.79 4.3
 -2 12 2 33.8 2.6
 2 12 2 32.9 3.2
 2 12 3 31.6 3.2
 -2 12 3 36.1 2.8
 -2 12 4 553.74 12
 2 12 4 498.45 13.4
 2 12 5 211.58 9.4
 -2 12 5 224.28 8.2
 -2 12 6 1344.77 22.3
 2 12 6 1347.97 25.3
 -2 12 7 267.07 10.8
 2 12 7 286.47 12.4
 -2 -12 8 54.39 5.6
 2 -12 8 52.49 5.3
 2 12 8 40.7 5.2
 2 12 8 41.5 4.4
 -2 12 8 37.7 4.4
 -2 12 8 43.5 4.8
 -2 -12 9 15.4 3.2
 -2 12 9 13.4 3.2
 2 12 9 17.3 3.7
 2 -12 9 16.6 3
 2 12 9 18.6 3.4
 -2 12 10 85.89 7.6
 -2 -12 10 107.49 8.7
 2 12 10 96.89 9.3
 2 -12 10 98.99 8.1
 -2 -12 11 3.6 2
 -2 12 11 2.3 2.1
 2 12 11 2.7 2.7
 -2 -12 12 -1.6 2.7
 -2 -12 12 1.1 2.3
 2 -12 12 -0.1 1.5
 -2 12 12 3.9 3.1
 -2 -12 13 53.19 7.2
 2 -12 13 45.5 6.3
 2 -12 14 -0.5 2.4
 -2 -12 14 0 2
 2 -12 15 184.58 12.5
 -2 -12 15 193.08 13.7
 2 -12 16 38.4 6
 -2 -12 16 42.4 7
 2 -12 17 8.5 2.5
 -2 -12 17 8.9 2.5
 -2 -12 18 20.8 4.2
 2 -12 18 16 3.4
 -2 -12 19 -1.1 1.4
 2 -12 19 1.2 1.2
 2 14 0 1494.85 19.3
 -2 14 0 1430.96 17.1
 2 14 1 107.99 5.5
 -2 14 1 98.59 4.6
 2 14 2 9.8 2
 -2 14 2 8 1.4
 -2 14 3 73.59 4.6
 2 14 3 71.79 5
 -2 14 4 36.8 3.3
 2 14 4 30.2 3.5
 -2 14 5 383.66 11.5
 2 14 5 347.77 12.5
 -2 14 6 45.9 4.3
 2 14 6 41.8 4.8
 2 -14 7 93.89 6.7
 -2 -14 7 91.79 6.9
 -2 14 7 109.89 7.2
 2 14 7 110.29 8.2
 2 14 7 104.79 6.8
 -2 -14 8 42.3 5
 -2 14 8 46.6 5.2
 2 -14 8 43.8 4.8
 2 14 8 44.9 5.6
 2 14 8 43.8 4.6
 2 14 9 385.56 14
 -2 14 9 390.16 16
 -2 -14 9 379.56 15.8
 2 14 9 411.76 17.9
 2 -14 9 351.56 14.5
 2 14 10 22.9 4.8
 -2 -14 10 33.2 5
 2 -14 10 27.5 4.1
 -2 -14 11 139.89 10.4
 2 -14 11 114.79 9.3
 2 14 11 144.59 12.6
 2 -14 12 24.6 4.8
 -2 -14 12 20 4.1
 2 -14 13 76.09 8
 -2 -14 13 82.19 8.7
 2 -14 14 20.4 4.4
 -2 -14 14 13.5 4.5
 2 -14 15 5.1 2.4
 -2 -14 15 2.3 2.3
 2 -14 16 4.9 2.4
 -2 -14 16 6.3 2.3
 -2 -14 17 0.2 1.8
 2 -14 17 -2 1.8
 -2 -14 18 28.2 5.1
 2 -14 18 25.3 4.4
 -2 -14 19 12.1 3
 -2 16 0 934.31 15.5
 2 16 0 930.01 17
 2 16 1 122.99 6.3
 -2 16 1 117.49 5.5
 2 16 -1 128.19 6.1
 2 16 2 23.6 3.1
 -2 16 2 23 2.7
 2 16 3 21.2 2.8
 -2 16 3 22.9 2.9
 2 16 4 47.9 4.7
 -2 16 4 56.09 4.3
 2 16 5 309.57 12.2
 -2 16 5 325.27 11.1
 2 16 6 10.9 2.7
 -2 -16 6 12.1 2.6
 2 -16 6 12.8 2.6
 -2 16 6 10.9 2.3
 2 16 6 13 2.3
 2 -16 7 86.89 6.9
 -2 16 7 100.29 7.1
 -2 -16 7 79.99 6.5
 2 16 7 99.09 8
 2 16 7 95.79 6.6
 -2 16 8 293.47 12.9
 2 -16 8 340.97 13.6
 2 16 8 287.07 11.9
 -2 -16 8 368.86 15.1
 2 16 8 287.37 14.6
 -2 16 9 342.67 15.3
 2 16 9 358.16 17.5
 2 -16 9 292.57 13.5
 -2 -16 9 319.97 14.7
 2 16 9 331.87 13.4
 2 -16 10 258.87 13.1
 -2 -16 10 273.47 13.8
 2 -16 11 152.18 10.7
 -2 -16 11 160.48 11.4
 2 16 11 180.08 14.2
 -2 -16 12 96.89 9
 2 -16 13 5.1 2.3
 -2 -16 13 9.5 3.6
 -2 -16 14 -2 2.9
 2 -16 14 0 2.5
 -2 -16 15 9.1 3.6
 2 -16 15 10.8 3.1
 -2 -16 16 4.1 2.3
 2 -16 16 5.3 2.4
 -2 -16 17 21.1 4.2
 2 -16 17 21.9 4.3
 -2 -16 18 31.2 5.2
 2 -16 18 27.5 4.5
 -2 -16 19 86.49 7.5
 2 18 0 106.99 6.3
 -2 18 0 94.09 5.3
 -2 18 1 111.09 5.9
 2 18 1 111.59 6.4
 2 18 -1 100.69 6
 -2 18 2 70.79 4.9
 2 18 2 70.09 5.3
 2 18 3 1.8 1.3
 -2 18 3 2.4 1.3
 -2 18 4 615.34 15.7
 2 18 4 572.64 17.2
 2 18 5 55.09 5.7
 2 18 5 65.49 5.3
 -2 18 5 60.29 5.2
 2 -18 5 64.79 5.6
 -2 -18 5 61.59 5.5
 2 18 6 76.19 6
 -2 18 6 80.49 6.3
 2 18 6 82.19 7.2
 -2 -18 6 99.39 7.3
 2 -18 6 97.69 7.1
 2 -18 7 170.58 9.7
 -2 -18 7 165.58 9.7
 -2 18 7 193.78 10.4
 2 18 7 190.78 9.6
 2 18 7 203.38 12
 2 -18 8 280.57 12.7
 -2 18 8 236.58 12.1
 2 18 8 259.77 14.4
 2 18 8 235.58 11.2
 -2 -18 9 584.34 20.5
 2 -18 9 566.84 19.1
 2 18 10 157.88 12.8
 2 -18 10 191.48 11.6
 -2 -18 10 195.28 12.2
 -2 -18 11 374.96 17.5
 2 -18 11 347.97 16.4
 2 18 11 402.26 21.8
 -2 -18 12 34.2 5.5
 2 18 12 27.3 6.3
 2 -18 12 33.4 5.2
 2 -18 13 95.29 9.3
 -2 -18 13 95.19 9.7
 2 -18 14 0.7 1.7
 -2 -18 14 1.5 2
 2 -18 15 3.5 2.2
 -2 -18 15 -0.9 2.2
 2 -18 16 2.2 1.7
 -2 -18 16 3.3 2.4
 -2 -18 17 9.1 2.9
 2 -18 17 8.4 2.6
 2 -18 18 57.09 5.9
 -2 -18 18 71.09 7.7
 -2 -18 19 58.99 6.3
 2 20 0 570.14 15.6
 -2 20 0 579.84 14.4
 2 20 1 24.7 3.2
 -2 20 -1 22.5 2.9
 -2 20 1 26.1 3.1
 2 20 -1 23.4 3.1
 -2 20 2 3.2 1.3
 2 20 -2 6.3 2.1
 2 20 2 2.2 1.3
 2 -20 3 128.69 7.6
 2 20 3 144.59 8
 2 20 3 137.49 8.5
 -2 20 3 147.19 7.9
 2 20 4 3.3 1.2
 -2 -20 4 2.8 1.6
 2 20 4 0.5 1.2
 2 -20 4 2.8 1.2
 -2 20 4 4.3 1.3
 -2 20 5 41.9 4.6
 -2 -20 5 39 4.6
 2 20 5 39.8 4.4
 2 20 5 41.5 5.2
 2 -20 5 39.4 4.3
 2 20 6 17 3.7
 2 -20 6 15.4 3.3
 -2 -20 6 13.7 2.8
 2 20 6 16 2.8
 -2 20 6 17.3 3
 -2 20 7 40 4.9
 -2 -20 7 33.2 4.4
 2 -20 7 32.2 4.6
 2 20 7 37.2 4.4
 2 20 7 41.2 5.6
 2 20 8 48.5 6.5
 -2 -20 8 63.19 6.5
 2 20 8 53.89 5.7
 2 -20 8 62.49 6.4
 2 -20 9 247.78 13
 -2 -20 9 267.37 14.1
 2 20 10 169.28 13.8
 -2 -20 10 200.78 12.6
 2 -20 10 196.78 12
 2 20 11 54.89 8.4
 -2 -20 11 44.3 6.1
 2 -20 11 44.8 5.8
 2 20 12 74.99 10.4
 -2 -20 12 91.99 9.3
 2 -20 12 103.79 9.5
 2 -20 13 3.2 2.6
 -2 -20 13 1.5 1.6
 -2 -20 14 2.2 2.4
 2 -20 14 3.6 2.4
 2 -20 15 12.9 3.7
 -2 -20 15 14.1 4.4
 2 -20 16 4.6 2.1
 -2 -20 16 9 3.3
 2 -20 17 -3.2 2.4
 -2 -20 17 -2.7 2.6
 -2 -20 18 30.8 4.9
 2 -20 18 21.7 3.6
 2 22 0 145.39 8.3
 -2 22 0 155.38 8.2
 2 22 1 77.99 6.3
 -2 22 1 74.69 5.7
 2 -22 1 62.09 5.5
 2 22 -1 66.69 5.7
 -2 22 -1 63.79 5.3
 2 -22 2 6.8 1.8
 -2 22 2 7.2 1.8
 2 22 -2 7.4 2
 2 22 2 7.1 1.9
 2 22 2 8.3 2.1
 2 -22 3 122.29 8
 -2 22 3 117.69 7.5
 2 22 3 109.39 8
 2 22 3 112.69 7.7
 -2 22 4 68.19 5.8
 2 -22 4 72.89 6.2
 2 22 4 60.39 5.7
 2 22 4 65.39 6.6
 -2 -22 4 73.49 6.2
 2 22 5 244.48 13
 -2 22 5 254.17 11.6
 2 22 5 252.67 11.3
 2 -22 5 209.68 10.8
 -2 -22 5 208.28 10.6
 -2 22 6 138.09 9
 2 22 6 139.89 10.5
 2 -22 6 149.88 9.7
 2 22 6 129.29 8.2
 -2 -22 6 162.08 9.7
 2 22 7 38.4 5.7
 2 22 7 35.5 4.7
 -2 -22 7 28.2 4.2
 2 -22 7 30 4.8
 2 -22 8 2.2 1.3
 -2 -22 8 0 2.2
 2 22 8 0.1 1.9
 2 22 9 -2.2 2.3
 2 -22 9 2.8 1.9
 -2 -22 9 2.7 2
 2 -22 10 25.3 4.7
 2 22 10 16.3 4.4
 -2 -22 10 22.6 4.3
 -2 -22 11 68.79 7.7
 2 -22 11 67.69 7.4
 2 22 11 73.39 9.8
 -2 -22 12 23.5 4.4
 2 -22 12 28.5 4.9
 -2 -22 13 1.6 2.6
 2 -22 14 47.4 6.4
 -2 -22 14 49.7 7.1
 2 -22 15 49.2 6.7
 -2 -22 15 62.59 7.8
 -2 -22 16 33.7 5.8
 2 -22 16 30.9 4.7
 2 -22 17 13.7 3.1
 -2 -22 17 15.2 3.6
 -2 -22 18 1.8 1.4
 2 24 0 58.09 5.7
 2 24 0 53.09 5.3
 -2 24 0 58.09 5.3
 2 -24 0 49.9 5.1
 2 24 -1 12.2 2.8
 2 -24 1 15 3
 -2 24 1 13.7 2.7
 2 24 1 15.8 3
 -2 24 -1 13.4 2.6
 2 24 1 15 3.1
 -2 24 2 65.69 5.8
 2 24 -2 60.79 5.7
 -2 24 -2 58.79 5.5
 2 -24 2 56.69 5.5
 2 24 2 61.39 5.7
 2 24 2 61.59 6.2
 2 -24 3 361.86 14.5
 2 24 3 404.16 14.8
 -2 -24 3 316.77 12.8
 2 24 3 375.46 16
 -2 24 3 395.06 14.6
 2 24 -3 311.17 13.1
 2 24 4 387.56 14.8
 -2 -24 4 450.75 15.9
 2 24 4 388.76 17.1
 2 -24 4 441.56 16.1
 -2 24 4 400.96 15
 2 -24 5 405.26 16
 2 24 5 484.55 19.7
 -2 -24 5 396.06 15.2
 2 24 5 480.65 16.2
 2 24 6 632.54 18.7
 2 -24 6 777.02 22
 -2 -24 6 770.72 22.6
 2 24 6 646.84 23.7
 2 24 7 192.28 10.7
 -2 -24 7 155.18 10.2
 2 -24 7 162.78 11
 2 24 7 196.38 13.5
 -2 -24 8 179.48 11.7
 2 -24 8 176.18 11.2
 -2 -24 9 10.9 3.2
 2 24 9 12.8 4.1
 2 -24 9 13.1 3.4
 2 -24 10 5.1 2.1
 2 24 10 -0.5 3
 -2 -24 10 6.2 2.8
 2 -24 11 9.6 3
 -2 -24 11 7.2 3
 -2 -24 12 6.8 1.8
 2 -24 12 6 2
 -2 -24 13 75.69 8.4
 -2 -24 14 51.79 7.3
 2 -24 14 45.1 6.2
 -2 -24 15 144.39 11.5
 2 -24 15 148.99 10.7
 2 -24 16 96.49 8.3
 -2 -24 16 96.89 9.2
 2 -24 17 29.1 4.2
 -2 -24 17 31 4.8
 2 26 0 4.2 1.5
 2 26 0 5.5 1.8
 2 -26 0 5.6 2.2
 -2 26 0 3.9 1.4
 2 26 1 27.4 3.9
 2 -26 -1 25.7 3.8
 -2 26 -1 28.4 4.2
 2 26 1 22.9 4
 2 -26 1 33.1 4.5
 -2 26 1 25.1 3.8
 2 26 -1 24.9 3.9
 2 -26 2 81.89 7
 2 26 2 67.19 7
 -2 26 -2 83.09 7
 2 26 2 69.99 6.4
 -2 26 2 68.59 6.5
 2 26 -2 85.29 7.2
 2 26 3 418.76 18
 2 26 -3 369.26 15.3
 -2 26 -3 374.36 14.8
 -2 26 3 414.16 16.1
 -2 -26 3 391.06 15.1
 2 -26 3 438.86 16.8
 2 26 3 438.76 16.1
 2 26 4 467.35 19.9
 2 26 -4 580.04 19.4
 -2 -26 4 574.34 19
 2 -26 4 578.04 19.1
 2 26 4 459.45 16.4
 2 -26 5 720.53 22.3
 2 26 5 783.42 26.1
 2 26 5 761.82 21.3
 2 -26 6 430.86 17.3
 2 26 6 353.16 18.6
 -2 -26 6 433.96 17.8
 2 26 6 339.17 14.6
 2 -26 7 465.05 18.8
 2 26 7 549.25 23.6
 -2 -26 7 442.76 17.8
 2 26 7 516.65 18
 2 26 8 51.29 7.5
 -2 -26 8 77.79 8
 2 -26 8 70.89 7.5
 -2 -26 9 1.4 3
 2 26 9 1.4 1.9
 2 -26 9 1.2 1.9
 -2 -26 10 13.9 3.9
 2 -26 10 12.7 3.5
 -2 -26 11 27.2 5
 2 -26 11 24 4.2
 -2 -26 12 131.69 11.1
 2 -26 12 124.99 10.6
 -2 -26 13 28.4 4.9
 2 -26 14 241.58 13.7
 -2 -26 14 261.47 15.7
 2 -26 15 100.39 8.7
 -2 -26 15 103.79 9.6
 2 -26 16 110.29 8.5
 -2 -26 16 121.99 9.8
 -2 -26 17 44.4 5.6
 2 -28 0 1.9 2
 2 28 0 3.3 2.2
 -2 28 0 1.1 1.7
 2 28 0 1.3 1.3
 -2 28 -1 6 1.7
 2 28 1 11.6 3.4
 2 -28 1 9.8 2.8
 2 28 -1 7.4 2
 2 28 1 8.7 2.4
 2 -28 -1 9.7 2.5
 -2 28 1 11.2 2.8
 2 -28 2 47.6 5.6
 2 28 2 53.49 6.8
 2 -28 -2 44.4 5.1
 2 28 -2 53.19 6.2
 -2 28 -2 46.3 5.7
 2 28 2 50.29 5.7
 -2 -28 2 44.7 5.1
 -2 28 -3 295.47 14.2
 2 28 -3 281.07 14.3
 2 28 3 351.16 17.5
 -2 -28 3 316.07 14.6
 2 -28 3 336.27 15.4
 2 28 3 350.16 14.9
 -2 28 -4 318.87 14.8
 2 -28 4 304.77 14.6
 -2 -28 4 297.47 14.3
 2 28 4 250.87 12.5
 2 28 -4 312.77 15.3
 2 28 4 243.08 15
 2 28 5 297.97 16.9
 2 -28 5 294.57 14.9
 -2 -28 5 264.37 13.8
 2 28 -5 251.87 13.9
 2 28 5 304.87 14.1
 2 -28 6 355.26 16.3
 2 28 6 268.67 13.4
 -2 -28 6 333.37 16.1
 2 28 6 275.57 17.2
 2 28 7 100.69 10.8
 -2 -28 7 81.29 8.1
 2 -28 7 95.59 9
 2 -28 8 -1.7 3
 2 28 8 1.7 2
 -2 -28 8 5 3.2
 2 -28 9 -3.2 2.8
 -2 -28 9 2.4 2.1
 -2 -28 10 12.4 4.3
 2 -28 10 10.6 3.2
 -2 -28 11 14.7 4.1
 2 -28 11 10.2 2.8
 -2 -28 12 62.09 7.7
 2 -28 12 68.19 7.5
 -2 -28 13 36.1 6
 2 -28 14 142.99 10.3
 -2 -28 14 156.08 11.9
 2 -28 15 119.49 9.1
 -2 -28 15 125.89 10.2
 2 -28 16 48.8 5.4
 -2 -28 16 66.99 6.9
 2 30 0 54.49 7
 -2 30 0 49.5 6.1
 2 -30 0 45.3 5.8
 2 -30 1 16 3.9
 2 30 1 16.7 4.2
 -2 30 -1 14.3 3.2
 2 30 -1 11.6 3
 2 30 1 14.1 3.3
 2 -30 -1 13.5 3.3
 2 30 2 5.2 1.8
 2 30 -2 6.1 1.7
 -2 -30 2 7.8 2.3
 2 30 2 11.2 2.9
 2 -30 -2 9.8 2.6
 -2 30 -2 7.9 2.4
 2 -30 2 8.6 2.5
 2 30 3 92.69 8.1
 2 -30 3 96.69 8.4
 2 30 -3 80.79 8.3
 2 30 3 94.29 9.7
 -2 -30 3 94.19 8.4
 -2 30 -3 83.09 8.2
 2 30 4 12.9 3.5
 -2 30 -4 22.8 4.5
 2 30 4 16.1 3.9
 2 30 -4 15.8 3.8
 2 -30 4 16.3 3.8
 -2 -30 4 14.1 3.4
 2 30 5 141.79 9.8
 2 -30 5 131.09 10.4
 -2 -30 5 114.79 9.6
 2 30 5 129.99 11.8
 2 30 -5 107.49 9.8
 -2 30 -5 105.69 9.4
 2 30 -6 39.6 6.2
 2 -30 6 36.5 5.6
 -2 -30 6 34.9 5.3
 2 30 6 28.1 5.9
 2 30 -7 8 3.4
 2 -30 7 -0.3 2.5
 2 30 7 3.3 2.2
 -2 -30 7 3.9 2.4
 -2 -30 8 4.5 2.4
 2 -30 8 1.1 3
 -2 -30 9 42 6.7
 2 -30 9 38.9 6
 -2 -30 10 97.79 9.6
 2 -30 10 105.59 9.7
 -2 -30 11 10.5 3.7
 2 -30 11 8.5 2.3
 2 -30 12 1.9 2.9
 -2 -30 12 2.5 2
 -2 -30 13 8.2 2.7
 2 -30 14 67.29 7.1
 -2 -30 14 76.19 8.1
 -2 -30 15 26.9 4.9
 2 -30 15 23.5 4
 -2 -30 16 38.1 5
 2 -32 0 94.89 8.6
 2 32 0 115.09 10.9
 2 -32 -1 461.45 18
 2 32 1 450.75 21.8
 2 32 1 468.65 18.3
 2 -32 1 485.55 19.5
 -2 -32 1 455.85 18.4
 2 32 -1 464.95 21.4
 2 32 2 21.9 4.3
 2 32 2 18.5 4.3
 2 -32 2 17.7 3.7
 -2 -32 2 25.6 4.9
 2 32 -2 18.1 4
 2 -32 3 125.79 9.9
 -2 32 -3 103.89 9.7
 2 32 3 112.79 11.3
 -2 -32 3 122.19 10
 2 32 -3 109.99 10.2
 2 32 3 122.39 9.5
 -2 -32 4 5.6 3
 -2 32 -4 6.6 2.4
 2 -32 4 3 2.7
 2 32 4 9.6 3.3
 2 32 -4 4.1 2
 2 32 4 3.4 1.7
 2 32 5 12.9 3.9
 2 32 -5 8.9 3.1
 2 -32 5 12.5 3.5
 -2 32 -5 8.9 3.3
 -2 -32 5 14.1 4
 -2 32 -6 6.9 2.9
 2 32 -6 15.1 4.4
 2 -32 6 14.2 4.3
 -2 -32 6 13.7 3.8
 2 -32 7 0.4 2.1
 -2 -32 7 2.1 2.1
 -2 32 -7 2.9 2.2
 2 32 -7 0.7 1.6
 2 -32 8 153.48 11.5
 -2 -32 8 156.58 11.7
 -2 -32 9 84.79 9.2
 2 -32 9 85.49 9.2
 2 -32 10 350.46 17.5
 -2 -32 10 326.27 17.2
 -2 -32 11 37.2 6
 2 -32 11 36.7 5.4
 -2 -32 12 45.7 6.4
 2 -32 12 43.9 5.9
 -2 -32 13 2.3 1.9
 2 -32 14 3.6 2
 -2 -32 14 5.2 2.7
 -2 -32 15 2.1 2
 2 -32 15 2.2 1.9
 -2 -34 0 162.08 11.7
 2 -34 0 175.48 12.1
 2 34 0 182.08 14.5
 2 34 1 691.93 28.6
 2 -34 1 806.82 26.1
 2 -34 -1 772.52 23.8
 -2 -34 1 778.22 25
 2 34 -1 711.43 28
 2 34 -2 273.77 17.5
 2 -34 2 237.68 14.1
 -2 -34 2 257.67 14.9
 2 34 -3 70.09 8.9
 -2 -34 3 76.29 8.3
 2 -34 3 75.89 8.1
 2 34 3 51.39 7.8
 2 -34 4 24.9 5.2
 -2 -34 4 22 4.8
 2 34 -4 16.4 4.1
 2 34 -5 30.3 6.1
 2 -34 5 32.5 5.7
 -2 -34 5 28.3 5.1
 2 -34 6 18 4.4
 -2 -34 6 20.5 4.2
 2 -34 7 26.2 5.5
 -2 -34 7 28.4 5.6
 2 -34 8 180.28 12.7
 -2 -34 8 172.98 12.6
 -2 -34 9 143.49 11.6
 2 -34 9 141.39 11.8
 2 -34 10 484.05 20.8
 -2 -34 10 499.75 21.1
 -2 -34 11 40.8 6.5
 2 -34 11 35.3 6
 -2 -34 12 228.28 13.8
 -2 -34 13 10 2.6
 -2 -34 14 23.3 4.3
 2 -34 14 16.1 3.1
 2 36 0 103.49 11.8
 2 -36 0 102.09 9.3
 -2 -36 0 101.79 9.7
 2 -36 1 1275.57 32.3
 2 36 -1 1052.19 36.4
 -2 -36 1 1339.27 34
 2 36 1 1048.5 36.8
 2 -36 -1 1321.67 32.6
 -2 -36 -1 1297.47 32.5
 -2 -36 -2 30.5 4.9
 2 -36 2 26 4.9
 -2 -36 2 35.4 6.1
 2 36 -2 30.4 6.3
 -2 -36 3 90.99 9.1
 2 -36 3 88.79 8.8
 2 -36 4 4.3 2.7
 -2 -36 4 4.5 2.4
 2 -36 5 11.6 3.8
 -2 -36 5 14.5 4.1
 -2 -36 6 0.5 2.2
 2 -36 6 4.7 2.9
 -2 -36 7 4.5 2.7
 2 -36 7 8.4 2.9
 -2 -36 8 187.38 13.2
 2 -36 8 205.38 13.7
 -2 -36 9 72.09 8.1
 2 -36 9 85.19 9
 -2 -36 10 364.16 17.8
 2 -36 10 374.06 18
 2 -36 11 28.3 5.3
 -2 -36 11 35.9 5.9
 -2 -36 12 175.08 11.9
 2 -36 13 9.4 2.5
 -2 -36 14 11.7 2.8
 2 -38 0 93.69 8.9
 -2 -38 0 97.99 9.9
 2 -38 1 203.78 13.4
 -2 -38 1 207.78 13.6
 -2 -38 -1 190.08 13
 -2 -38 2 24.4 5
 2 -38 2 25.2 4.8
 -2 -38 -2 25.2 4.6
 -2 -38 3 5.3 2.8
 2 -38 3 1.6 1.9
 -2 -38 -3 3.9 2.3
 -2 -38 4 5.2 3.1
 2 -38 4 5.9 2.7
 -2 -38 -4 7.4 2.4
 2 -38 5 29.1 5.5
 -2 -38 5 25.8 4.8
 2 -38 6 39.2 6.3
 -2 -38 6 50.99 7
 2 -38 7 2.9 2.1
 -2 -38 7 2.2 2.3
 2 -38 8 35.6 5.7
 -2 -38 8 35.8 5.7
 2 -38 9 25.5 4.9
 -2 -38 9 25.9 4.5
 2 -38 10 173.48 12.2
 -2 -38 10 181.18 12.3
 2 -38 11 4 2.1
 -2 -38 11 3.7 2.1
 -2 -38 12 57.09 6.4
 -2 -38 13 1.9 1.9
 -2 -40 0 6.5 3.3
 2 -40 0 5.2 2.7
 2 -40 1 59.69 7.3
 -2 -40 1 52.69 7.1
 -2 -40 -1 52.29 6.8
 2 -40 2 3.2 2.4
 -2 -40 -2 2.4 1.6
 -2 -40 2 1 2.8
 -2 -40 -3 99.39 9.2
 -2 -40 3 97.19 9.2
 2 -40 3 102.89 9.8
 -2 -40 -4 33 5.4
 -2 -40 4 36.6 6
 2 -40 4 40.2 6.4
 2 -40 5 119.69 10.5
 -2 -40 5 128.19 11.2
 -2 -40 6 68.39 8.2
 2 -40 6 66.49 7.7
 2 -40 7 9.3 2.7
 -2 -40 7 10.3 3.2
 2 -40 8 -2.1 2.5
 -2 -40 8 -0.4 2.2
 2 -40 9 0.5 1.6
 -2 -40 9 0.4 1.5
 2 -40 10 26.4 4.7
 -2 -40 10 29.3 4.9
 -2 -40 11 -1.3 1.9
 -2 -42 0 1.9 1.9
 -2 -42 1 37.6 5.7
 -2 -42 -1 41.4 6
 2 -42 1 41.2 6.1
 -2 -42 2 2.9 1.7
 2 -42 2 9.9 3.5
 -2 -42 -2 5.5 2.5
 -2 -42 -3 156.98 10.9
 2 -42 3 174.68 12.2
 -2 -42 3 178.48 12.8
 2 -42 4 110.79 10.1
 -2 -42 4 126.69 10.8
 2 -42 5 217.28 13.7
 -2 -42 5 232.18 14.5
 -2 -42 6 106.39 9.8
 2 -42 6 107.39 9.5
 -2 -42 7 39.3 6
 2 -42 7 40.6 5.8
 2 -42 8 19.6 3.7
 -2 -42 8 26 4.7
 -2 -42 9 -0.8 1.4
 2 -42 9 -2 2.1
 -2 -42 10 -1.3 2
 -2 -44 0 -0.6 2
 -2 -44 1 10.9 2.9
 -2 -44 -1 15.5 3.6
 2 -44 2 6.5 2.4
 -2 -44 2 1.2 2.4
 -2 -44 -2 5 2.6
 2 -44 3 120.59 9.5
 -2 -44 3 135.29 10.8
 -2 -44 4 77.09 8.4
 2 -44 4 74.89 7.7
 2 -44 5 186.08 12
 -2 -44 5 195.78 12.9
 2 -44 6 160.18 11
 -2 -44 6 167.58 11.6
 -2 -44 7 60.99 6.9
 2 -44 7 57.69 6.4
 2 -44 8 48.1 5.7
 -2 -44 8 51.39 6.1
 2 -44 9 2.9 1.7
 -2 -44 9 2.2 1.1
 -2 -46 0 -2 2
 -2 -46 1 2.3 1.9
 -2 -46 -1 2.3 2
 -2 -46 2 -0.7 2.3
 2 -46 3 37.6 5
 -2 -46 3 53.79 6.4
 2 -46 4 27.1 4.4
 -2 -46 4 32.6 5.2
 -2 -46 5 102.69 8.8
 2 -46 5 79.89 7.4
 2 -46 6 78.49 7.1
 -2 -46 6 94.19 8.1
 -2 -46 7 39.6 5.2
 -2 -48 1 72.99 7
 -2 -48 2 -0.2 1.2
 -2 -48 3 2.2 2
 3 -1 0 1 0.3
 3 1 0 1.5 0.5
 3 -1 -1 703.03 5.2
 3 1 1 696.03 9.1
 3 -1 1 722.93 9.1
 3 -1 2 205.78 6.1
 3 1 2 211.28 6
 3 -1 3 613.34 11.7
 3 1 3 593.74 11.3
 3 1 4 94.39 5.1
 3 -1 4 86.59 5.1
 3 1 5 327.07 10.5
 3 -1 5 322.07 10.9
 3 1 6 38 4
 3 -1 6 38.8 4.2
 3 1 7 4.9 2.1
 -3 1 9 59.99 5.5
 -3 -1 9 54.59 5.3
 -3 1 10 275.17 12.3
 3 1 10 251.77 11.6
 -3 -1 10 245.78 12.2
 3 -1 10 228.38 11.3
 -3 -1 11 2.2 1.7
 3 1 11 3.4 2
 3 -1 11 1.8 1.3
 -3 1 11 2.7 2.2
 3 -1 12 281.57 14
 -3 -1 12 275.77 14.5
 3 1 12 303.07 13.7
 -3 1 12 274.97 14.2
 3 -1 13 8.5 2.2
 -3 1 13 5.6 2.3
 -3 -1 13 6.6 2.3
 3 1 13 9.1 2.9
 -3 1 14 114.89 10
 -3 -1 14 129.19 10.4
 3 -1 14 122.79 9.6
 3 1 14 114.99 9.4
 -3 1 15 12.5 3.7
 3 1 15 19.7 4.4
 -3 -1 15 17.2 4.1
 3 -1 15 23.8 4.7
 -3 1 16 131.29 10.8
 3 1 16 116.19 9.7
 3 -1 16 110.69 9.3
 -3 -1 16 127.39 10.5
 3 -1 17 46.7 6
 3 1 17 43.9 5.8
 -3 1 17 34.6 7
 -3 -1 17 35.3 6.3
 -3 1 18 26.1 5.3
 -3 -1 18 21.8 5.6
 3 -1 18 27 4.6
 -3 -1 19 70.59 7.4
 -3 1 19 59.09 7.6
 3 3 0 21.8 1.5
 3 -3 1 90.69 3.6
 3 3 1 87.79 3.5
 3 3 2 126.69 4.9
 3 -3 2 125.99 5.3
 3 -3 3 1593.34 20.1
 3 3 3 1534.15 18.4
 3 3 4 51.19 3.9
 3 3 5 10 2.3
 3 3 6 68.29 5.4
 3 3 7 119.09 7.4
 3 3 8 16.9 3.2
 -3 -3 9 5.4 1.8
 -3 3 9 4.3 1.8
 -3 3 10 164.38 9.4
 3 -3 10 125.09 8.6
 3 3 10 137.39 8.9
 -3 -3 10 157.18 9.4
 -3 3 11 2.4 1.3
 3 3 11 3.9 1.9
 -3 -3 11 3.5 1.4
 3 -3 11 4.1 1.5
 3 3 12 72.69 7.3
 3 -3 12 72.29 7.2
 -3 3 12 78.09 7.4
 -3 -3 12 82.69 7.8
 3 3 13 0.1 1.8
 3 -3 13 0.8 1.9
 -3 3 13 0.5 1.9
 -3 -3 13 1.9 2
 3 3 14 31.8 5.2
 -3 3 14 35.3 5.4
 3 -3 14 30.8 5
 -3 -3 14 34.2 5.3
 -3 -3 15 9 3
 3 3 15 21 4.4
 -3 3 15 19.6 3.7
 3 -3 15 13.9 3.5
 -3 -3 16 13.6 3.3
 -3 3 16 17.4 4.1
 3 3 16 14.7 3.9
 3 -3 16 11.6 3.1
 -3 3 17 12 4.5
 -3 -3 17 17.4 4.2
 3 -3 17 13.2 3.7
 3 -3 18 21.7 4.4
 -3 -3 18 33.6 5.4
 -3 3 18 36.9 6.1
 -3 -3 19 12.9 3.8
 3 5 0 52.09 2.6
 3 5 1 630.44 9.9
 3 5 2 32.3 2.6
 3 5 3 1257.47 16.9
 3 5 4 662.53 13.5
 3 5 5 9.6 2
 3 5 6 1.4 1.4
 3 5 7 13.3 2.5
 3 5 8 31.3 4.3
 -3 -5 9 23.3 3.6
 -3 5 9 18.7 3.4
 3 5 9 18.3 4.1
 -3 5 10 27.1 3.8
 -3 -5 10 30.2 4.4
 3 5 10 25.8 3.8
 3 -5 10 27.3 4
 3 -5 11 2.2 1.7
 -3 -5 11 3.6 1.7
 3 5 11 2.7 1.7
 -3 5 11 1.2 1.4
 -3 5 12 133.39 9.7
 3 5 12 144.09 9.6
 3 -5 12 128.09 9.8
 -3 -5 12 140.39 10.3
 -3 -5 13 3.4 2.3
 3 -5 13 1.1 1.4
 -3 5 13 1.8 1.7
 3 5 13 6.7 2.6
 -3 -5 14 38.7 6.1
 3 5 14 31.4 5.5
 -3 5 14 28.1 5.6
 3 -5 14 32.5 5.6
 -3 5 15 11.8 4
 3 -5 15 8.5 3.1
 3 5 15 15.8 4.2
 -3 -5 15 6.8 3.6
 3 -5 16 1.5 1.5
 -3 5 16 5.1 3.3
 -3 -5 16 -0.3 2.4
 3 -5 17 2.8 2
 -3 5 17 0.9 2.6
 -3 -5 17 1.3 1.9
 -3 -5 18 4.2 2.4
 3 -5 18 3 1.5
 -3 -5 19 11.9 3.5
 -3 -5 20 1.5 1.6
 3 7 0 139.39 4.7
 3 7 1 1907.81 18.8
 -3 7 1 1933.11 10.4
 3 7 2 7.6 1.4
 -3 7 2 8.6 0.8
 -3 7 3 1299.97 12.2
 3 7 3 1315.17 18.1
 -3 7 4 818.72 12
 3 7 4 874.81 16.3
 3 7 5 10.3 2
 -3 7 5 12.1 1.8
 3 7 6 83.49 6.1
 3 7 7 50.89 5
 -3 7 8 44.9 4.5
 3 7 8 48.3 5.3
 3 7 9 16.7 3.1
 3 7 9 20.8 4.2
 -3 7 9 13.8 2.9
 3 7 10 407.66 14.9
 -3 -7 10 403.76 16
 -3 7 10 387.36 14.3
 -3 -7 10 344.67 14.8
 3 7 10 414.26 17.9
 3 -7 10 345.27 14.6
 -3 7 11 69.69 6.9
 3 7 11 84.29 7.4
 3 -7 11 72.19 7.1
 -3 -7 11 86.89 7.7
 3 7 12 113.99 9.2
 -3 7 12 125.79 9.4
 -3 -7 12 137.29 10
 3 -7 12 127.79 9.4
 3 -7 13 14.1 3.4
 -3 -7 13 13.3 3.5
 3 7 13 15.6 3.8
 -3 7 13 16 3.9
 3 -7 14 158.48 11.3
 -3 7 14 173.28 12.1
 3 7 14 167.78 11.6
 -3 -7 14 182.98 12.7
 3 -7 15 23.4 4.7
 -3 7 15 28.7 5.8
 -3 -7 15 25.7 5.5
 -3 -7 16 13 3.8
 -3 7 16 16.8 5.1
 3 -7 16 11.7 3.5
 -3 -7 17 8.8 3
 3 -7 17 5.5 2.2
 -3 -7 18 59.19 8
 3 -7 18 49.5 5.9
 -3 -7 19 25.8 4.8
 -3 -7 20 10.6 2.9
 3 9 0 266.07 7
 3 9 1 224.08 6.8
 -3 9 1 212.28 4.5
 -3 9 2 147.89 4
 3 9 2 138.19 5.8
 -3 9 3 542.85 8.7
 3 9 3 538.55 12.6
 -3 9 4 140.19 5.1
 3 9 4 132.99 6.6
 3 9 5 166.28 8.2
 -3 9 5 154.98 6.1
 3 9 6 26.1 3.6
 -3 9 6 23.6 2.8
 3 9 7 381.36 14.1
 3 -9 8 171.78 9.5
 -3 9 8 169.38 8.6
 3 9 8 181.58 10.5
 -3 9 9 103.59 7.2
 3 9 9 101.09 7.6
 3 9 9 106.59 8.6
 3 9 9 89.69 6.5
 3 9 10 647.64 23
 -3 -9 10 595.14 19.9
 -3 9 10 636.44 18.5
 3 9 10 676.03 19.7
 3 9 11 40.7 6
 3 9 11 53.49 7.4
 -3 9 11 51.29 5.9
 -3 -9 11 51.59 6
 3 -9 11 49.1 5.9
 -3 -9 11 49.3 6.4
 3 -9 12 458.65 18.5
 3 9 12 512.35 19.3
 -3 9 12 487.85 18.6
 -3 -9 12 520.85 19.9
 3 -9 13 20.8 4.4
 -3 -9 13 21.3 4.7
 -3 9 13 22.1 4.9
 -3 9 14 171.38 12.3
 -3 -9 14 172.48 12.6
 3 -9 14 144.69 10.9
 -3 9 15 14.6 5
 3 -9 15 11 3.7
 -3 -9 15 8.2 4
 3 -9 16 81.89 8.1
 -3 -9 16 85.79 9.3
 -3 -9 17 102.39 9.9
 3 -9 17 78.39 7.8
 3 -9 18 6.5 2.3
 -3 -9 18 7.2 2.8
 -3 -9 19 61.59 7.2
 -3 -9 20 20.8 3.8
 3 11 0 62.19 3.7
 3 11 1 305.97 8.5
 -3 11 1 290.17 6.3
 -3 11 2 7.1 1.1
 3 11 2 7.4 1.7
 -3 11 3 96.29 4.1
 3 11 3 80.49 5.2
 -3 11 4 173.08 6.1
 3 11 4 162.68 7.7
 -3 11 5 90.99 4.9
 3 11 5 91.89 6.5
 -3 11 6 366.16 10.9
 3 11 6 359.96 13.1
 3 11 7 25.7 3.9
 -3 11 7 23.8 3.2
 3 11 8 97.69 6.9
 -3 11 8 93.49 6.7
 3 11 8 101.99 8.2
 3 -11 8 96.59 7
 -3 11 9 143.29 8.9
 -3 -11 9 166.88 10.3
 3 11 9 162.08 10.8
 3 11 9 153.38 8.8
 -3 11 10 105.29 7.9
 3 11 10 109.59 9.7
 -3 -11 10 101.39 8.4
 -3 11 11 16.7 3.8
 3 11 11 12.4 4.2
 -3 -11 11 16.2 3.5
 3 -11 11 15.5 3.7
 3 -11 12 193.78 11.9
 -3 11 12 199.48 12.4
 -3 -11 12 227.88 13.4
 -3 -11 12 228.78 13.6
 -3 -11 13 8.3 3.1
 3 -11 13 7.5 2.7
 -3 11 13 11.8 3.7
 -3 -11 14 19.4 4.5
 3 -11 14 21.9 4.4
 3 -11 15 12.5 3.7
 -3 -11 15 16.3 4.3
 -3 -11 16 62.59 8.2
 3 -11 16 66.59 7.5
 -3 -11 17 8.5 3.3
 3 -11 17 8.5 2.7
 3 -11 18 19.8 3.7
 -3 -11 18 33.5 5.6
 -3 -11 19 13.4 3.1
 -3 -11 20 2.8 1.7
 3 13 0 55.29 3.8
 3 13 -1 14.6 2.1
 3 13 1 16.1 2
 -3 13 1 16.2 1.7
 3 13 2 18.7 2.6
 -3 13 2 20.2 2
 -3 13 3 22.7 2.2
 3 13 3 20.4 2.9
 -3 13 4 0.1 0.6
 3 13 4 0.5 1
 3 13 5 7.3 1.9
 -3 13 5 2 0.8
 3 13 6 403.06 14.4
 -3 13 6 389.96 11.6
 3 13 7 22.3 3.1
 3 -13 7 24.2 3.5
 -3 13 7 23 3.1
 3 13 7 21 3.7
 -3 -13 8 53.29 5.7
 3 13 8 59.09 5.5
 3 13 8 68.99 6.8
 3 -13 8 53.39 5.3
 -3 -13 9 24.7 4.1
 3 13 9 22.3 3.5
 3 13 9 22.5 4.2
 -3 13 9 21.1 3.6
 3 -13 9 19.8 3.3
 3 13 10 24.1 5
 -3 -13 10 28.9 4.7
 -3 13 10 24.1 4
 3 -13 10 27.1 4
 -3 -13 11 1.6 1.5
 3 13 11 4.9 2.9
 -3 -13 12 8.6 2.7
 3 -13 12 12 3.4
 -3 -13 12 14.6 4.3
 -3 -13 13 28 5.8
 3 -13 13 23.5 4.5
 3 -13 14 -0.9 1.7
 -3 -13 14 -1 2
 3 -13 15 -0.5 2
 -3 -13 15 0.8 2.2
 3 -13 16 9.1 3.1
 -3 -13 16 12.5 3.4
 3 -13 17 3.6 1.9
 -3 -13 17 -3.7 3.2
 -3 -13 18 -1.5 2.4
 -3 -13 19 0 1.7
 3 15 0 103.99 6
 -3 15 0 114.89 4.9
 -3 15 1 21.8 2.2
 3 15 -1 23.8 2.8
 3 15 1 19.8 2.4
 -3 15 2 24.8 2.5
 3 15 2 23.8 3.2
 3 15 3 202.18 9
 -3 15 3 222.78 7.5
 -3 15 4 177.98 7.1
 3 15 4 161.18 8.3
 3 15 5 950.4 21.4
 -3 15 5 938.51 17.5
 3 15 6 151.78 8
 -3 15 6 143.39 7.5
 3 15 6 145.89 9.1
 3 -15 6 136.19 8.1
 3 15 7 6.7 1.7
 3 -15 7 10.4 2.3
 3 15 7 10 2.5
 -3 15 7 6.2 1.7
 -3 -15 7 6.7 1.8
 3 -15 8 97.99 7.4
 -3 -15 8 111.59 8.4
 -3 15 8 111.39 7.7
 3 15 8 110.69 7.4
 3 15 8 114.39 9.1
 -3 -15 9 79.49 7.5
 3 15 9 75.49 7.9
 3 -15 9 64.99 6.3
 3 15 9 59.99 5.9
 3 15 10 30.7 5.6
 -3 -15 10 28.4 4.6
 3 -15 10 27.5 4
 3 15 11 5 2.8
 -3 -15 11 8.3 2.7
 3 -15 12 108.99 9.4
 3 15 12 111.09 12
 -3 -15 12 98.19 9.2
 -3 -15 13 43.9 6.8
 3 -15 13 32.5 5.3
 -3 -15 14 32.2 6
 3 -15 14 25.8 4.8
 3 -15 15 21.1 4.6
 -3 -15 15 16.9 4.9
 -3 -15 16 54.29 7.1
 3 -15 16 48.5 6.2
 3 -15 17 15.6 3.4
 -3 -15 17 18.7 4.2
 -3 -15 18 24.7 4.5
 -3 -15 19 13.8 3.5
 -3 17 0 3.3 1.1
 3 17 0 2.3 0.9
 3 17 -1 64.59 4.8
 -3 17 1 66.69 4.3
 3 17 1 67.79 4.9
 3 17 2 6.1 1.9
 -3 17 2 5.8 1.5
 3 17 3 75.79 5.9
 -3 17 3 84.49 5.2
 3 17 4 1430.66 26.7
 -3 17 4 1608.94 23.2
 3 17 5 761.12 20.4
 3 17 5 772.62 17.9
 -3 17 5 819.32 17.4
 3 -17 5 872.31 20.2
 -3 -17 5 908.01 20.6
 -3 17 6 227.48 9.9
 3 17 6 241.28 12.3
 -3 -17 6 207.28 10.3
 3 17 6 234.28 10.5
 3 -17 6 205.78 10.4
 -3 17 7 321.77 12.2
 -3 -17 7 440.56 15.9
 3 17 7 350.06 15.6
 3 -17 7 402.06 14.6
 3 17 7 339.97 12.8
 3 17 8 333.47 13.1
 3 -17 8 287.67 12.9
 -3 -17 8 311.77 14.3
 3 17 8 353.16 16.7
 -3 -17 9 131.99 9.7
 3 -17 9 109.39 8.3
 3 17 9 100.49 7.6
 3 17 9 104.39 9.8
 3 17 10 80.39 9.2
 3 -17 10 66.79 6.8
 -3 -17 10 70.39 7.5
 3 17 11 67.49 9
 3 -17 11 64.89 7.1
 -3 -17 11 71.69 7.8
 -3 -17 12 75.79 8.1
 3 17 12 83.59 10.6
 -3 -17 13 35.8 6
 3 -17 13 37.2 5.4
 -3 -17 13 43.8 7.4
 3 -17 14 77.39 8
 -3 -17 14 85.89 9.3
 -3 -17 15 39.8 6.4
 3 -17 15 32.6 5.2
 -3 -17 16 73.19 8.2
 3 -17 16 61.19 6.9
 3 -17 17 70.39 6.9
 -3 -17 17 76.79 8.2
 -3 -17 18 52.79 6.5
 -3 -17 19 33.4 4.8
 -3 19 0 37.3 3.4
 3 19 0 34.9 3.8
 -3 19 1 5.4 1.2
 3 19 -1 4.4 1.4
 3 19 1 7.1 1.4
 3 19 -2 136.79 7.3
 3 19 2 151.28 8.3
 -3 19 2 163.58 7.5
 3 19 3 653.83 18.3
 -3 19 3 746.33 16.5
 -3 19 4 328.67 11.2
 3 19 4 330.27 11.8
 3 19 4 314.07 13.3
 3 19 5 369.56 14.9
 3 -19 5 450.65 15
 3 19 5 393.06 13.4
 -3 -19 5 469.25 15.3
 -3 19 5 386.06 12.6
 -3 -19 6 352.76 13.8
 3 19 6 398.56 13.7
 3 19 6 414.46 17
 3 -19 6 354.26 14.1
 3 19 7 115.89 7.7
 3 19 7 115.99 9.5
 -3 -19 7 154.68 9.9
 3 -19 7 148.09 9.2
 -3 -19 8 216.28 12.3
 3 19 8 269.17 15.3
 3 19 8 251.07 11.7
 3 -19 8 216.48 11.4
 3 19 9 57.19 7.7
 3 -19 9 56.89 6.2
 3 19 9 53.39 5.9
 -3 -19 9 64.09 7
 3 -19 10 16.7 3.5
 3 19 10 21.2 5.3
 -3 -19 10 21.5 4.3
 3 -19 11 53.69 6.6
 -3 -19 11 52.09 6.8
 3 19 11 54.39 8.5
 -3 -19 12 51.29 6.6
 3 19 12 53.89 8.4
 3 -19 13 20.9 4.2
 -3 -19 13 26.1 4.7
 -3 -19 14 36 6.3
 3 -19 14 25.4 4.6
 -3 -19 15 46.6 6.9
 3 -19 15 36.9 5.7
 3 -19 16 57.59 6.6
 -3 -19 16 56.89 7.6
 3 -19 17 29.6 4.5
 -3 -19 17 37.1 5.6
 -3 -19 18 36.2 5.4
 3 21 0 47.4 4.6
 -3 21 0 47.2 4.3
 3 21 -1 112.99 7
 -3 21 1 93.19 6
 3 21 1 96.09 6.8
 -3 21 -1 111.69 6.5
 3 21 -2 54.39 5
 3 21 2 76.09 5.6
 -3 21 2 71.29 5.3
 3 21 2 73.59 6.2
 3 21 3 187.48 9.3
 3 -21 3 222.78 10.6
 3 21 3 196.18 10.5
 -3 21 3 204.78 9.3
 3 21 4 45.2 4.7
 3 21 4 36.3 4.8
 3 -21 4 41.3 4.6
 -3 -21 4 39.6 4.5
 -3 21 4 38.7 4.1
 3 21 5 14.9 2.6
 -3 -21 5 16.6 3.2
 3 21 5 10.5 3
 3 -21 5 17.5 3.3
 3 21 6 61.89 5.6
 3 -21 6 55.19 5.8
 3 21 6 55.89 6.6
 -3 -21 6 48.3 5.4
 -3 -21 7 60.99 6.3
 3 21 7 48 6.5
 3 -21 7 57.69 6
 3 21 7 46.2 4.8
 3 21 8 4.6 1.7
 3 21 8 4.3 2
 -3 -21 8 0.3 2
 3 -21 8 4.7 2
 3 21 9 6.4 2.7
 3 -21 9 6 2.1
 3 21 9 1.8 1.7
 -3 -21 9 2.6 1.4
 3 -21 10 8 2.6
 -3 -21 10 12.4 3.7
 3 21 10 10.4 3.3
 3 -21 11 2.7 1.9
 -3 -21 11 3.4 1.7
 3 21 11 5.5 3
 3 21 12 4.7 3
 -3 -21 12 0.8 2.7
 3 -21 13 1.8 1.9
 -3 -21 13 -0.6 3.7
 3 -21 14 3 2.2
 -3 -21 14 7.2 3.4
 -3 -21 15 20.6 4.7
 3 -21 15 18.1 4.2
 -3 -21 16 0.7 1.7
 3 -21 16 -0.9 1.7
 -3 -21 17 4.9 2.1
 -3 -21 18 5.5 2.2
 3 23 0 200.48 10.3
 -3 23 0 205.08 9.4
 3 23 0 194.78 9.7
 3 -23 0 195.68 9.9
 3 23 1 56.19 5.2
 -3 23 1 62.69 5.2
 3 23 1 58.99 5.9
 -3 23 -1 68.29 5.4
 3 -23 1 60.99 5.6
 3 23 -1 71.79 6.2
 3 23 2 151.08 8.6
 -3 23 2 152.68 8.4
 -3 23 -2 140.99 7.9
 3 23 2 161.48 9.9
 3 23 -2 131.99 8.2
 3 -23 2 150.58 9.2
 3 23 -3 30.4 4.1
 3 23 3 25.3 3.7
 3 23 3 23.2 3.9
 -3 23 3 25.6 3.6
 3 -23 3 29.4 4.1
 3 23 4 13.3 2.9
 3 23 4 15.2 3
 3 -23 4 14 3
 -3 -23 4 14.1 2.9
 3 23 5 28.2 3.9
 -3 -23 5 34.2 4.6
 3 23 5 28.4 4.8
 3 -23 5 32.7 4.6
 3 23 6 44 6.1
 -3 -23 6 33.8 4.8
 3 -23 6 36.3 5.2
 3 23 6 46.4 5.2
 3 23 7 62.19 7.7
 3 -23 7 73.49 7.1
 -3 -23 7 72.79 7
 3 23 7 58.99 5.8
 3 -23 8 63.99 6.7
 -3 -23 8 58.59 6.6
 3 23 8 70.29 8.7
 3 23 8 67.29 6.5
 3 -23 9 103.89 8.8
 3 23 9 91.39 7.7
 -3 -23 9 113.89 9.7
 3 23 9 88.59 10.5
 -3 -23 10 29 5.2
 3 23 10 27 6
 3 -23 10 27.5 4.6
 -3 -23 11 4.6 2.4
 3 -23 11 2.3 1.7
 3 23 11 3.2 2.7
 -3 -23 12 75.19 8.3
 -3 -23 13 29.4 5.3
 -3 -23 14 4.5 3
 3 -23 14 2.9 2.2
 3 -23 15 16.6 3.8
 -3 -23 15 20 4.8
 -3 -23 16 11.6 3.5
 3 -23 16 7.9 2.1
 -3 -23 17 -0.1 1.5
 -3 -23 18 1.7 1.1
 3 25 0 149.39 8.8
 3 -25 0 146.39 9
 -3 25 0 142.59 8.4
 3 25 0 147.29 9.6
 3 25 -1 310.87 13.6
 -3 25 1 280.77 12
 3 25 -1 255.27 11.6
 3 25 1 304.77 14
 3 -25 1 262.67 12.3
 3 -25 -1 236.68 11.6
 -3 25 -1 305.17 12.6
 3 25 1 282.77 12.4
 3 25 2 223.88 11
 3 25 -2 179.38 10.4
 -3 25 -2 180.48 9.8
 3 25 2 228.58 12.5
 3 -25 2 210.58 11.4
 3 25 3 173.68 11.4
 3 25 3 160.58 9.6
 3 -25 3 202.88 11.1
 3 25 -3 207.48 11
 3 25 4 200.18 10.7
 3 25 -4 167.68 10.2
 3 -25 4 184.08 11
 -3 -25 4 177.98 10.1
 3 25 4 216.88 13.2
 3 25 5 30.5 4.4
 3 -25 5 36 5.1
 -3 -25 5 31.9 4.6
 3 25 5 27.9 5.1
 3 25 6 159.38 9.7
 3 25 6 165.28 12.6
 -3 -25 6 137.49 9.7
 3 -25 6 140.39 10.1
 3 25 7 156.98 9.7
 3 25 7 162.88 13
 3 -25 7 201.88 12.3
 -3 -25 7 210.98 12.5
 3 -25 8 158.68 10.7
 -3 -25 8 155.08 11.2
 3 25 8 190.28 14.5
 3 25 8 179.08 10.6
 -3 -25 9 147.59 11
 3 -25 9 143.69 10.7
 3 25 9 118.99 12.2
 3 -25 10 107.99 9.4
 3 25 10 113.59 12.6
 -3 -25 10 122.99 10.6
 3 -25 11 186.58 12.6
 -3 -25 11 195.88 13.2
 3 -25 12 22.2 4.4
 -3 -25 12 20 4.4
 -3 -25 13 83.99 8.8
 -3 -25 14 87.19 9.4
 3 -25 14 79.29 7.8
 -3 -25 15 48.9 6.7
 3 -25 15 43.2 5.6
 -3 -25 16 31.9 5.1
 3 -25 16 22.8 3.9
 -3 -25 17 6.4 2.2
 3 27 0 469.95 16.7
 -3 27 0 426.16 15.8
 3 27 0 453.25 18
 3 -27 0 449.26 16.7
 3 27 1 119.79 8.6
 -3 27 -1 140.29 9.1
 3 27 -1 144.79 10
 3 27 1 121.09 9.5
 3 -27 1 137.19 9.4
 -3 27 -2 291.47 13.2
 3 27 -2 308.37 14.7
 3 27 2 325.87 13.9
 3 -27 2 336.77 15.2
 3 27 2 315.07 15.9
 3 27 3 185.78 10.5
 -3 27 -3 239.58 12.1
 3 27 -3 229.68 12.5
 3 -27 3 216.48 12
 3 27 3 190.58 12.8
 -3 -27 3 207.98 11.2
 3 -27 4 155.88 10.6
 3 27 -4 135.19 9.8
 3 27 4 164.48 10
 -3 -27 4 137.99 9.5
 3 27 4 154.28 11.9
 3 27 5 55.49 6.1
 3 27 -5 80.19 7.7
 3 27 5 62.29 7.8
 -3 -27 5 66.39 6.7
 3 -27 5 73.59 7.3
 3 27 6 30.3 5.8
 3 -27 6 24.1 4.9
 -3 -27 6 21.7 4.4
 3 27 6 26.1 4.4
 3 27 7 142.39 12.5
 -3 -27 7 176.78 11.6
 3 27 7 150.58 9.9
 3 -27 7 177.18 11.8
 3 -27 8 99.79 8.9
 -3 -27 8 98.09 9.5
 3 27 8 124.49 12.4
 3 27 8 115.99 8.9
 3 -27 9 31.2 5.4
 -3 -27 9 35.3 5.9
 3 27 9 22 5.7
 3 27 10 96.29 11.7
 -3 -27 10 103.69 10.4
 3 -27 10 108.79 9.7
 -3 -27 11 246.08 15.1
 3 -27 11 239.08 14.2
 -3 -27 12 24.2 4.9
 3 -27 12 18.4 3.6
 -3 -27 13 83.59 9
 3 -27 14 69.79 7.3
 -3 -27 14 82.39 8.9
 3 -27 15 46.3 5.6
 -3 -27 15 61.89 7.4
 -3 -27 16 15.8 3.7
 -3 -27 17 22.4 3.8
 3 29 0 39.3 5
 3 -29 0 44.1 5.4
 3 29 0 38.4 5.8
 3 29 1 52.39 5.8
 3 29 -1 52.29 6.6
 3 29 1 58.99 7.3
 3 -29 1 53.99 6.4
 3 -29 -1 50.89 5.6
 3 29 2 112.89 8.6
 3 29 2 113.99 10.3
 3 29 -2 93.59 8.4
 -3 29 -2 93.29 8.2
 3 -29 2 108.09 8.8
 -3 -29 3 48.4 5.7
 3 -29 3 50.89 6.2
 3 29 3 42.3 6.4
 3 29 -3 53.49 6.6
 3 29 3 44.9 5.3
 -3 29 -3 52.89 6.1
 3 29 4 29.4 4.4
 3 -29 4 30.9 5.2
 3 29 -4 26.1 4.6
 -3 29 -4 26.5 4.5
 3 29 4 26.9 5
 -3 -29 4 26.6 4.6
 3 29 5 10.3 3.2
 3 29 -5 11.3 3.6
 -3 -29 5 7.5 2.5
 3 29 5 8.5 2.3
 3 -29 5 7.9 3
 3 29 -6 62.89 7.5
 3 29 6 86.89 7.7
 3 -29 6 73.39 7.9
 3 29 6 79.69 9.6
 -3 -29 6 61.89 7.1
 3 29 -7 4.6 2.7
 3 29 7 2.2 2.1
 3 29 7 5.8 3.1
 3 -29 7 1.7 2.1
 -3 -29 7 0 2.5
 3 29 8 3.5 3.3
 -3 -29 8 4.8 2.9
 3 -29 8 -2.1 2.8
 3 -29 9 40.1 6.1
 -3 -29 9 44 6.5
 3 -29 10 12 3.4
 -3 -29 10 12.1 4
 -3 -29 11 60.39 7.3
 3 -29 11 61.49 7.4
 -3 -29 12 48.4 6.9
 -3 -29 13 52.19 7.1
 3 -29 14 -0.5 1.2
 -3 -29 14 4.5 3
 -3 -29 15 24.5 4.7
 3 -29 15 17.4 3.5
 -3 -29 16 5.9 2.2
 3 31 0 13.5 3.3
 3 -31 0 14.1 3.3
 3 31 0 18.3 4.7
 3 31 1 5 2.1
 3 31 1 7.3 3.2
 3 31 -1 8.8 3.1
 3 -31 1 6 2.2
 3 31 -2 -0.8 2.6
 3 31 2 3.7 1.9
 -3 -31 2 1.9 2.1
 3 -31 2 0.7 2.3
 3 31 2 6.1 1.8
 3 31 3 23.6 4.1
 3 -31 3 28.8 4.8
 3 31 -3 29.6 5.1
 3 31 3 25.2 5.1
 -3 -31 3 28.7 5
 3 31 4 13.3 3.3
 3 31 4 10.4 3.1
 3 -31 4 18.7 4.5
 -3 31 -4 13.8 3.5
 -3 -31 4 16 4
 3 31 -4 16.5 4.1
 3 31 -5 32.7 5.8
 -3 31 -5 28.7 5.3
 3 31 5 19.2 5
 -3 -31 5 28.5 5.1
 3 31 5 29.4 4.8
 3 -31 5 39.6 6.2
 3 31 6 56.09 6.5
 3 31 6 50.59 8.3
 -3 31 -6 41.7 6.3
 3 31 -6 45.2 6.8
 3 -31 6 55.19 7.2
 -3 -31 6 51.59 6.6
 3 31 -7 143.59 12.3
 3 -31 7 137.79 11
 -3 -31 7 140.59 11
 3 -31 8 3.4 1.9
 -3 -31 8 4.7 2.4
 -3 -31 9 32.1 6
 3 -31 9 31.8 5.4
 3 -31 10 0.4 1.9
 -3 -31 10 2.3 2.6
 3 -31 11 4.8 2.3
 -3 -31 11 8.8 3.2
 -3 -31 12 0.5 1.6
 -3 -31 13 -0.8 1.9
 -3 -31 14 7.6 3.3
 3 -31 14 2.6 1.8
 -3 -31 15 8.4 3
 3 33 0 211.08 15.3
 3 -33 0 215.18 12.8
 3 33 1 47.9 6.1
 3 33 -1 57.59 7.9
 -3 -33 1 47.9 6.3
 3 33 1 53.29 7.8
 3 -33 1 44.1 5.9
 3 33 -2 337.37 19
 3 -33 2 369.46 17.7
 3 33 2 352.76 20
 -3 -33 2 339.37 16.8
 3 33 2 362.86 16.2
 3 33 3 13.9 3.5
 3 -33 3 14.4 4
 3 33 -3 12.3 3.6
 3 33 3 5.7 1.7
 -3 -33 3 12.2 3.5
 3 33 4 5.4 2.8
 3 33 -4 -0.5 2
 -3 -33 4 6.1 2.6
 3 33 4 5.7 2.9
 3 -33 4 4.4 3.2
 -3 -33 5 116.59 10.1
 3 33 -5 114.79 11.4
 3 -33 5 115.09 10.5
 3 33 5 84.49 10.6
 3 33 5 101.49 8.7
 -3 -33 6 177.18 12.2
 3 -33 6 183.48 13
 3 -33 7 107.69 9.8
 -3 -33 7 103.29 9.7
 3 -33 8 62.99 7.7
 -3 -33 8 61.09 7.6
 -3 -33 9 128.29 11.2
 3 -33 9 134.49 11.2
 -3 -33 10 15.6 4.2
 3 -33 10 12.1 3.6
 -3 -33 11 49 7
 3 -33 11 49.8 6.6
 -3 -33 12 7 2.6
 3 -33 13 32.2 4.8
 -3 -33 13 37.8 5.7
 3 -33 14 6.4 2
 -3 -33 14 12 3.3
 -3 -33 15 38.5 5.2
 -3 -35 0 293.67 15.3
 3 -35 0 277.67 14.6
 3 35 0 259.57 18.2
 3 35 -1 165.88 14.2
 3 35 1 130.69 9.9
 3 -35 1 144.69 11.2
 3 35 1 122.99 12.7
 -3 -35 1 146.79 11.3
 -3 -35 2 266.97 15.4
 3 35 -2 239.58 16.9
 3 -35 2 262.27 15.1
 3 35 2 250.77 13.5
 3 35 3 12.3 3.6
 3 -35 3 13.4 3.8
 3 35 -3 10.6 3.6
 -3 -35 3 11.9 3.2
 -3 -35 4 149.09 11.7
 3 -35 4 149.19 11.8
 -3 -35 5 132.89 11
 3 -35 5 122.99 11.1
 3 -35 6 44.9 6.7
 -3 -35 6 40.4 6
 3 -35 7 90.39 9.1
 -3 -35 7 91.29 9.1
 -3 -35 8 60.69 7.4
 3 -35 8 64.69 7.9
 3 -35 9 119.79 10.6
 -3 -35 9 112.49 10.6
 -3 -35 10 20.3 4.6
 3 -35 10 19.9 4.3
 3 -35 11 102.39 9.4
 -3 -35 11 98.99 9.4
 -3 -35 12 9.7 3.2
 -3 -35 13 93.19 8.6
 3 -35 13 61.09 6.1
 -3 -35 14 14.7 3.3
 -3 -37 0 593.54 23
 3 -37 1 22.5 4.8
 -3 -37 1 16.6 4.4
 -3 -37 -1 22.5 4.2
 3 -37 2 9.3 3.4
 -3 -37 2 7.9 3.3
 -3 -37 -2 3.1 1.8
 3 -37 3 22.8 4.7
 -3 -37 3 22.4 4.6
 3 -37 4 147.39 11.9
 -3 -37 4 155.78 12.2
 -3 -37 5 17.5 3.8
 3 -37 5 14.4 3.7
 3 -37 6 29.9 5.2
 -3 -37 6 27.9 5.3
 3 -37 7 40.5 6.2
 -3 -37 7 38.6 5.9
 3 -37 8 21.1 4.5
 -3 -37 8 12.7 3.6
 -3 -37 9 53.59 6.9
 3 -37 9 58.09 7.2
 -3 -37 10 3.1 1.7
 3 -37 10 2.3 1.7
 -3 -37 11 45.8 6.2
 -3 -37 12 1 1.3
 -3 -37 13 27.2 4.4
 -3 -39 0 25.3 5.1
 3 -39 1 5 2.7
 -3 -39 1 3.3 2.5
 -3 -39 -1 5.9 2.9
 3 -39 2 -0.3 2
 -3 -39 -2 0.5 1.8
 -3 -39 2 -2 2.9
 3 -39 3 6.5 1.7
 -3 -39 3 0.3 2.9
 -3 -39 -3 6.5 2.3
 -3 -39 4 2.5 2.6
 3 -39 4 3.7 1.9
 -3 -39 -4 5.8 2.9
 -3 -39 -5 3.2 1.9
 3 -39 5 1.5 1.7
 -3 -39 5 1.8 2.6
 3 -39 6 11.1 3.3
 -3 -39 6 11.7 3.9
 3 -39 7 -0.4 2.5
 -3 -39 7 -3 2.9
 -3 -39 8 0.7 1.9
 3 -39 8 -3.2 2.7
 3 -39 9 0.1 2.5
 -3 -39 9 -0.9 2.5
 -3 -39 10 -2.1 2.3
 3 -39 10 -1.8 2.2
 -3 -39 11 -2.1 2.7
 -3 -39 12 -5.6 2.7
 -3 -41 0 360.16 17.9
 -3 -41 1 11.6 3.5
 -3 -41 -1 11.7 4
 -3 -41 -2 24.1 4.7
 3 -41 2 27.2 4.9
 -3 -41 2 24.6 4.5
 -3 -41 -3 7.7 3.1
 3 -41 3 8.8 3.2
 -3 -41 3 6.1 1.9
 -3 -41 4 33.3 5.6
 3 -41 4 31.7 5.3
 -3 -41 -4 29.4 5
 3 -41 5 10.6 3.4
 -3 -41 5 10 3.7
 3 -41 6 10.2 3.1
 -3 -41 6 15.6 3.9
 3 -41 7 60.69 7
 -3 -41 7 59.39 7.2
 -3 -41 8 18.5 4
 3 -41 8 17 3.5
 3 -41 9 24.7 4.5
 -3 -41 9 22 4
 -3 -41 10 2.7 1.8
 -3 -41 11 33.2 4.6
 -3 -43 0 207.68 13.6
 -3 -43 1 6 2.4
 -3 -43 -1 9.1 3.3
 -3 -43 2 125.59 10.3
 -3 -43 -2 127.69 10.2
 3 -43 3 17.5 3.9
 -3 -43 3 13.7 3.1
 -3 -43 -3 19.6 4.2
 -3 -43 4 94.39 9.2
 3 -43 4 83.89 8.2
 -3 -43 -4 74.69 7.6
 3 -43 5 25.2 4.5
 -3 -43 5 32.1 5.6
 3 -43 6 33.6 5.3
 -3 -43 6 34.2 5.6
 -3 -43 7 87.79 8.3
 3 -43 7 83.49 7.9
 -3 -43 8 34.6 5.1
 3 -43 8 35.5 5.2
 -3 -43 9 73.59 7.1
 -3 -45 0 79.29 7.9
 -3 -45 1 -0.6 2.3
 -3 -45 -1 3.3 2
 -3 -45 -2 63.79 6.9
 -3 -45 2 66.39 7.5
 -3 -45 3 14.7 3.7
 -3 -45 -3 12.7 3.3
 3 -45 4 26.9 4.4
 -3 -45 4 34.5 5.3
 3 -45 5 18.5 3.6
 -3 -45 5 26.2 4.8
 3 -45 6 25.4 4.2
 -3 -45 6 33.8 5.1
 3 -45 7 38.3 5.1
 -3 -45 7 44.8 5.6
 -3 -45 8 13.2 3
 -3 -47 0 2.2 2.2
 -3 -47 -1 0.5 1.6
 -3 -47 1 1.5 1.8
 -3 -47 2 6.8 2.7
 -3 -47 3 -2.5 2.2
 -3 -47 4 -0.1 1.4
 -3 -47 5 2.4 1.9
 4 0 0 76.49 2.8
 4 0 1 29.2 2.1
 4 0 -1 27.4 1.5
 4 0 2 7650.73 37.9
 4 0 3 142.79 6
 4 0 4 554.84 13.2
 4 0 5 274.37 10
 4 0 6 85.39 6
 4 0 7 442.56 14.9
 -4 0 9 57.69 5.5
 4 0 10 2.3 1.1
 -4 0 10 1.5 1.1
 -4 0 11 98.99 7.7
 4 0 11 77.59 7
 4 0 12 -0.1 1.4
 -4 0 12 -0.1 1.5
 4 0 13 148.89 10.2
 -4 0 13 167.18 11.4
 4 0 14 18.8 4.1
 -4 0 14 22.6 4.3
 -4 0 15 425.56 19
 4 0 15 375.56 16.6
 -4 0 16 145.79 12.3
 4 0 16 151.48 10.4
 4 0 17 107.49 8.8
 -4 0 17 132.09 11.6
 -4 0 18 7.5 2.4
 -4 0 19 18.6 4.3
 4 -2 0 1834.32 12.3
 4 2 0 1776.82 14.6
 4 -2 -1 2.8 0.4
 4 -2 1 3.1 0.8
 4 2 -1 4.1 0.8
 4 -2 2 16.7 1.9
 4 2 2 15.8 1.8
 4 -2 3 950.2 15.7
 4 2 3 950 15.2
 4 -2 4 2616.94 30
 4 2 4 2699.23 28.2
 4 2 5 658.63 15.4
 4 -2 5 680.93 16.2
 4 2 6 253.47 10.4
 4 2 7 7.5 2.1
 4 2 8 4.9 2.2
 -4 2 9 28.9 4
 -4 -2 9 34 4.1
 -4 -2 10 0.9 1.3
 4 2 10 -0.9 1.3
 4 -2 10 -0.6 1.4
 -4 2 10 0.4 1.3
 -4 2 11 36.3 5
 4 -2 11 36.9 4.5
 -4 -2 11 44.4 5.2
 4 2 11 33 4.8
 -4 -2 12 3.4 1.7
 4 -2 12 0.7 1.2
 -4 2 12 -0.2 2.7
 4 2 12 1.6 1.2
 4 2 13 128.69 9.6
 4 -2 13 124.19 9.7
 -4 -2 13 130.09 10.4
 -4 2 13 126.49 10.3
 -4 2 14 19.1 4
 4 -2 14 14.3 3.8
 4 2 14 24.9 4.5
 -4 -2 14 18.7 4.2
 4 2 15 166.58 11.4
 -4 2 15 171.98 12.9
 4 -2 15 162.48 11.2
 -4 -2 15 204.78 13
 4 -2 16 46.3 6.1
 -4 2 16 50.79 7.6
 -4 -2 16 48.6 7.1
 4 2 16 53.19 6.6
 -4 2 17 36.5 5.9
 -4 -2 17 22.4 5.7
 -4 -2 18 49.9 7.1
 -4 2 18 52.69 6.8
 -4 -2 19 0.1 1.4
 4 4 0 894.71 11.2
 4 4 -1 29.2 2
 4 4 1 37.2 2.6
 4 4 2 1339.57 16.8
 4 4 3 73.99 4.5
 4 4 4 640.44 13.9
 4 4 5 162.98 7.7
 4 4 6 1.3 1.1
 4 4 7 87.79 6.5
 4 4 8 42.1 5.1
 4 4 9 294.67 13.9
 -4 -4 9 281.57 12
 -4 4 9 292.47 12.1
 4 -4 10 1.4 1.4
 4 4 10 0.7 1.2
 -4 -4 10 4 1.8
 -4 4 10 1.4 1.7
 4 4 11 8.8 2.6
 -4 -4 11 17.3 3.2
 4 -4 11 8.8 2.5
 -4 4 11 10.1 2
 -4 -4 12 1 1.4
 -4 4 12 1.3 2
 4 4 12 -0.4 1.5
 4 -4 12 2 1.3
 4 4 13 -0.1 1.5
 -4 -4 13 -1.9 2.2
 -4 4 13 -1.6 2.1
 4 -4 13 2.4 1.3
 4 4 14 14.3 3.6
 4 -4 14 14.1 3.3
 -4 -4 14 13.5 3.9
 -4 4 14 13.5 3.5
 4 -4 15 71.99 7.3
 4 4 15 72.59 7.6
 -4 -4 15 81.49 8.3
 -4 4 15 70.79 7.7
 4 -4 16 31.9 5.1
 -4 -4 16 43.7 6.2
 -4 4 16 30.9 5.7
 -4 4 17 82.19 8.6
 -4 -4 17 86.99 8.7
 -4 -4 18 1.4 1.9
 -4 4 18 -0.1 1.6
 -4 -4 19 11.5 3.8
 -4 -4 20 59.09 6.5
 4 6 0 2245.68 19.4
 4 6 -1 31.5 2.3
 4 6 1 45.2 3.1
 4 6 2 566.64 11.9
 4 6 3 268.17 8.5
 4 6 4 672.43 14.6
 4 6 5 2.5 1.3
 4 6 6 59.49 5.2
 4 6 7 58.89 5.6
 -4 6 8 31.2 3.9
 4 6 8 33.8 4.4
 -4 6 9 749.42 19.5
 4 6 9 790.92 23.7
 4 6 10 139.29 8.8
 -4 6 10 133.49 8.7
 -4 -6 10 150.28 9.4
 4 -6 10 129.99 8.7
 4 6 10 146.59 10.7
 4 6 11 606.24 19.6
 -4 6 11 586.64 19
 4 -6 11 601.44 19.1
 -4 -6 11 546.15 20
 -4 -6 12 18.8 3.8
 4 6 12 12.5 3.8
 -4 6 12 12.4 3.3
 4 -6 12 14.6 3.3
 -4 6 13 110.69 9
 4 -6 13 98.09 8.4
 4 6 13 94.99 8.7
 -4 -6 13 111.49 9.4
 -4 6 14 7.3 3.2
 4 -6 14 7.2 3
 -4 -6 14 5.5 2.9
 4 6 14 8.7 3.2
 -4 6 15 2.3 2.2
 4 -6 15 0.6 1.7
 -4 -6 15 -1.4 2.7
 4 -6 16 56.69 6.8
 -4 -6 16 65.49 8.3
 -4 6 16 73.69 8.5
 -4 6 17 1.6 2.6
 -4 -6 17 0.3 2.2
 -4 -6 18 29.8 5.2
 -4 -6 19 55.49 7.1
 -4 -6 20 91.49 7.9
 4 8 0 3812.52 28
 4 8 -1 121.99 4.8
 -4 8 1 118.59 2.3
 4 8 2 328.07 9.3
 4 8 3 64.09 4.4
 4 8 4 329.87 10.6
 4 8 5 114.99 6.8
 4 8 6 27.3 3.7
 4 8 7 57.59 5.6
 4 8 8 81.99 7
 -4 8 8 72.39 5.8
 -4 8 9 388.56 14
 4 8 9 383.26 14.1
 4 8 9 399.66 16.8
 4 8 9 343.77 12.7
 4 -8 10 137.59 9.4
 4 8 10 146.69 10
 -4 8 10 162.28 9.6
 4 8 10 136.59 8.4
 4 8 10 171.48 12
 4 8 11 1333.27 28.9
 -4 8 11 1240.68 27.3
 4 8 11 1207.18 34.1
 4 -8 11 1149.69 26.7
 -4 -8 11 1264.87 28.7
 4 -8 12 58.49 6.6
 -4 8 12 52.89 6.8
 4 8 12 67.79 7.4
 -4 -8 12 73.49 7.6
 -4 8 13 110.39 9.1
 -4 -8 13 116.19 9.8
 4 -8 13 94.09 8.5
 -4 8 14 7.7 3.6
 4 -8 14 3.9 2.1
 -4 -8 14 3.7 2.3
 -4 8 15 39 6.2
 4 -8 15 36.6 5.5
 -4 -8 15 39.1 5.9
 -4 8 16 3.8 3.3
 -4 -8 16 1.5 2.3
 4 -8 16 2.9 1.6
 -4 -8 17 36.6 6.1
 -4 -8 18 120.49 10.2
 -4 -8 19 59.79 7.1
 -4 -8 20 130.19 9
 4 10 0 1471.55 18.5
 4 10 1 176.58 6.7
 -4 10 1 162.28 3.8
 4 10 -1 172.28 6.1
 -4 10 2 491.95 6.6
 4 10 2 561.64 12.8
 4 10 3 317.97 10.3
 -4 10 3 294.57 5.8
 4 10 4 265.17 9.9
 -4 10 4 246.98 6.2
 -4 10 5 51.09 3.4
 4 10 5 54.09 4.8
 4 10 6 16.6 3
 4 -10 7 41.6 4.4
 4 10 7 41.4 4.9
 4 10 8 28.5 3.7
 4 10 8 31.9 4.6
 -4 10 8 35.5 4.1
 4 -10 8 32.6 4.1
 -4 10 9 576.14 17.2
 4 10 9 570.14 20.4
 4 10 9 537.65 16.3
 -4 -10 10 184.18 11.2
 4 10 10 158.78 9.2
 4 10 10 164.28 12
 -4 10 10 163.08 10.2
 -4 -10 11 1296.57 30.5
 -4 10 11 1229.38 28.1
 4 10 11 1261.27 35.5
 4 -10 11 1182.98 27.1
 -4 10 12 60.79 7
 -4 -10 12 59.99 7.2
 4 -10 12 52.19 6.5
 -4 10 13 104.79 9
 4 -10 13 99.19 8.7
 -4 -10 13 102.59 9.6
 -4 -10 14 27.3 5.4
 -4 10 14 29.4 5.8
 4 -10 14 26 4.6
 4 -10 15 0.9 1.3
 -4 -10 15 -0.4 2.5
 -4 -10 16 5.5 1.8
 4 -10 16 6.5 2.3
 -4 -10 17 33.7 5.8
 -4 -10 18 52.39 6.8
 -4 -10 19 43.2 5.8
 -4 -10 20 114.09 9
 4 12 0 804.42 14.6
 -4 12 1 241.38 5.6
 4 12 1 263.07 8.5
 -4 12 2 7.6 1
 4 12 2 9.7 1.9
 4 12 3 0.2 1.1
 -4 12 3 1.8 0.6
 -4 12 4 6.2 1.1
 4 12 4 5.3 1.7
 4 12 5 45.3 4.4
 -4 12 5 37.8 3
 4 12 6 777.52 20.2
 -4 12 6 739.33 14.9
 4 -12 7 128.39 8
 -4 12 7 127.89 7.8
 4 12 7 136.99 9
 4 12 7 131.39 7.6
 4 12 8 62.19 6.6
 -4 12 8 53.39 5.3
 4 -12 8 70.59 6.2
 4 12 8 60.29 5.4
 -4 -12 8 70.69 6.4
 4 12 9 441.76 15.2
 4 12 9 437.56 18.6
 4 -12 9 417.36 15.9
 -4 12 9 431.56 15.2
 -4 -12 9 392.46 16.2
 -4 12 10 193.98 11
 4 12 10 190.68 10.4
 4 12 10 188.78 13.1
 4 -12 11 216.88 12
 4 12 11 222.78 15.3
 -4 12 11 223.08 12.2
 -4 -12 11 217.38 13.1
 4 -12 12 7.9 2.9
 -4 -12 12 14.4 4.1
 4 12 12 11.1 4.2
 -4 12 12 10 3.4
 4 -12 13 14.7 4
 -4 -12 13 17 4.2
 -4 -12 14 13.3 3.6
 4 -12 14 10.6 2.9
 4 -12 15 32 5.2
 -4 -12 15 42.9 6.6
 4 -12 16 3.8 2
 -4 -12 16 -3.2 3.3
 -4 -12 17 -2 3.1
 -4 -12 18 9.4 3
 -4 -12 19 12.9 3.2
 4 14 0 524.85 12.8
 -4 14 1 24.4 2.1
 4 14 1 27.4 3
 4 14 -1 30.1 3
 -4 14 2 29.7 2.3
 4 14 2 29.5 3.5
 -4 14 3 109.59 4.5
 4 14 3 105.99 6.5
 4 14 4 217.78 9.7
 -4 14 4 213.18 6.7
 -4 14 5 1138.49 17.1
 4 14 5 1183.38 23.8
 4 14 6 470.05 13.9
 -4 14 6 435.56 11.9
 4 14 6 481.65 16.4
 4 14 7 222.88 10.2
 -4 -14 7 181.98 10
 4 14 7 201.68 11.2
 4 -14 7 191.58 9.9
 4 14 8 5.2 1.9
 4 14 8 5.1 2.2
 4 -14 8 4.5 1.7
 -4 -14 8 2.1 2.1
 4 14 9 96.89 9.3
 4 -14 9 91.19 7.4
 -4 -14 9 90.69 8.1
 4 14 9 101.69 7.6
 -4 -14 10 21.8 4.6
 4 -14 10 21.4 3.9
 4 14 10 27 4.1
 4 14 10 23.5 4.8
 4 14 11 56.99 8.2
 -4 -14 11 52.19 6.7
 -4 -14 12 31.2 5.1
 4 14 12 29.1 6.8
 4 -14 12 31.3 4.9
 4 -14 13 27.4 4.6
 -4 -14 13 31.4 5.3
 4 -14 14 65.99 7.1
 -4 -14 14 76.19 8.8
 4 -14 15 95.49 8.6
 -4 -14 15 111.29 10.4
 -4 -14 16 89.59 9.2
 -4 -14 17 47.9 6.3
 -4 -14 18 1.8 1.4
 -4 -14 19 -1.3 2
 4 16 0 27.1 3.1
 -4 16 0 26.5 2.5
 4 16 -1 3.1 1.3
 4 16 1 3.2 1.5
 -4 16 1 0.8 0.6
 -4 16 2 3.9 1.1
 4 16 -2 5.4 1.8
 4 16 2 4.5 1.5
 -4 16 3 304.87 8.3
 4 16 3 304.67 11.7
 -4 16 4 2436.06 24.7
 4 16 4 2460.25 35
 -4 16 5 1036.1 17.7
 4 16 5 1078.29 24.1
 4 16 5 1111.49 21.5
 4 -16 5 989.5 22.1
 -4 -16 6 724.23 19.3
 4 16 6 612.14 16.4
 4 -16 6 706.43 18.7
 4 16 6 606.54 19.3
 4 16 7 496.95 15.8
 4 -16 7 429.56 15.4
 -4 -16 7 450.35 16.4
 4 16 7 494.65 18.4
 4 16 8 38 4.4
 4 -16 8 44.5 5.1
 4 16 8 35.1 5.2
 -4 -16 8 43.3 5.2
 4 -16 9 25.8 3.8
 -4 -16 9 33.7 5.1
 4 16 9 29 5.3
 4 16 9 33.1 4.5
 4 16 10 12.4 3.2
 4 -16 10 12.6 2.8
 -4 -16 10 19.7 4.1
 4 16 10 11.1 3.6
 4 16 11 10.9 3.5
 -4 -16 11 8.3 3
 -4 -16 12 35.6 5.4
 4 16 12 36.6 7.3
 4 -16 12 34.7 5.6
 -4 -16 13 155.08 12
 4 -16 13 153.28 10.6
 -4 -16 13 179.68 12.8
 4 -16 14 77.49 7.8
 -4 -16 14 92.99 9.6
 4 -16 15 314.27 15.4
 -4 -16 15 398.56 19.2
 -4 -16 16 155.58 12.1
 -4 -16 17 107.39 9.8
 -4 -16 18 39.8 5.6
 -4 -16 19 5.6 2
 4 18 0 8.8 2
 -4 18 0 10.3 1.7
 4 18 1 6.5 1.8
 4 18 -1 4 1.6
 -4 18 1 6.5 1.3
 4 18 2 74.19 5.8
 4 18 -2 68.79 5.2
 -4 18 2 77.19 4.7
 -4 18 3 1056.39 17.1
 4 18 3 1104.09 23.3
 4 18 4 810.82 21.1
 4 18 4 810.42 18.2
 4 18 5 1185.78 26.6
 4 18 5 1243.58 23
 4 -18 5 1077.49 23.9
 -4 -18 5 1044.2 22.9
 4 18 6 560.54 16.3
 4 18 6 547.65 19.4
 4 -18 6 690.13 19.3
 -4 -18 6 728.13 19.9
 4 18 7 465.75 15.5
 4 18 7 448.46 18.3
 -4 -18 7 416.16 16.1
 4 18 8 190.28 10.3
 -4 -18 8 231.78 12.4
 4 -18 8 230.08 11.7
 4 18 8 196.58 12.9
 4 -18 9 -3.5 2.6
 -4 -18 9 2 2
 4 18 9 -1.7 1.7
 4 18 9 1.5 1.7
 4 18 10 4.2 2.1
 -4 -18 10 5.3 2.5
 4 -18 10 -0.4 2.1
 4 18 10 0.4 1.8
 -4 -18 11 4.6 2.5
 4 18 11 5 2.9
 -4 -18 12 94.99 9
 4 18 12 86.89 11.2
 -4 -18 13 83.49 9.3
 4 -18 13 69.39 7.3
 -4 -18 13 72.89 8.3
 4 -18 14 143.59 10.6
 -4 -18 14 172.38 12.7
 -4 -18 15 236.68 15.2
 4 -18 15 197.68 12
 -4 -18 16 193.58 13.5
 -4 -18 17 138.29 11
 -4 -18 18 37.7 5.4
 -4 -18 19 11 2.7
 -4 20 0 828.42 16.6
 4 20 0 793.52 18.7
 -4 20 1 25.5 2.9
 -4 20 -1 21.5 2.7
 4 20 -1 16.4 2.9
 4 20 1 27.1 3.7
 4 20 2 375.56 12.6
 4 20 -2 418.36 13.3
 4 20 2 424.96 14.8
 -4 20 2 416.26 11.9
 4 -20 3 281.27 12.1
 4 20 3 320.77 11.8
 4 20 3 319.47 13.3
 4 20 4 437.76 14.1
 4 20 4 446.86 16.7
 4 20 5 365.26 15.5
 4 20 5 385.46 13.5
 4 -20 5 337.77 13.9
 -4 -20 5 349.77 13.8
 4 20 6 422.06 14.5
 4 20 6 408.96 17.5
 -4 -20 6 536.25 17.7
 4 -20 6 516.05 17.4
 4 20 7 216.08 10.8
 -4 -20 7 187.28 11.1
 4 -20 7 179.58 10.4
 4 20 7 204.18 13.1
 4 -20 8 33.7 4.6
 4 20 8 24.7 4
 4 20 8 32.5 5.5
 -4 -20 8 33.2 4.6
 4 20 9 6.4 2.4
 4 20 9 3.1 2.2
 4 -20 9 1.3 1.7
 -4 -20 9 5.4 2.5
 4 20 10 10.6 3.1
 4 20 10 10.3 3.9
 -4 -20 10 6.9 3
 4 -20 10 6.5 2.3
 4 -20 11 0.7 2.3
 -4 -20 11 2.4 1.7
 4 20 11 4.2 2.8
 -4 -20 12 0.1 2.8
 4 20 12 4 2.9
 -4 -20 13 52.29 6.6
 4 -20 13 50.19 6.4
 4 -20 14 36.1 5.6
 -4 -20 14 47.6 7
 4 -20 15 148.49 10.3
 -4 -20 15 169.48 13
 -4 -20 16 157.88 12.1
 -4 -20 17 45.1 6.2
 -4 -20 18 11.8 3
 4 22 0 842.52 20.8
 -4 22 0 861.01 18.1
 4 22 -1 257.47 11.6
 -4 22 -1 264.57 10.1
 4 22 1 280.07 11.2
 4 22 1 302.77 12.7
 -4 22 1 290.67 10.5
 4 -22 1 258.67 11.7
 4 22 2 59.79 5.2
 4 22 -2 65.59 5.8
 4 -22 2 55.09 5.3
 4 22 2 62.39 6.1
 4 22 -3 128.99 8.1
 4 -22 3 151.08 9.4
 4 22 3 167.98 10.2
 4 22 3 154.18 8.7
 4 22 4 206.18 10
 4 22 4 214.38 12.3
 4 22 5 138.99 8.4
 4 22 5 120.79 9.5
 -4 -22 5 113.49 8.4
 4 -22 5 115.49 8.3
 4 22 6 48.3 5.1
 4 22 6 43 6.3
 4 -22 6 62.69 6.5
 -4 -22 6 55.59 6
 4 -22 7 5.9 2.3
 4 22 7 7.6 3.1
 4 22 7 5.1 2
 -4 -22 7 4.6 2.3
 4 22 8 47.8 7.2
 4 -22 8 59.79 6.4
 -4 -22 8 68.19 7.2
 4 22 8 49.3 5.4
 -4 -22 9 26.4 4.9
 4 -22 9 27.9 4.5
 4 22 9 31.4 5.9
 4 22 9 30.6 4.8
 4 22 10 43.1 7.6
 4 -22 10 63.19 7
 -4 -22 10 58.99 7.6
 4 -22 11 138.39 10.6
 -4 -22 11 141.49 11.2
 4 22 11 131.59 13.8
 -4 -22 12 15.9 3.8
 4 -22 13 24.6 4.4
 -4 -22 13 24.1 4.2
 4 -22 14 38.9 5.5
 -4 -22 14 48.4 6.8
 -4 -22 15 26.1 5.4
 -4 -22 16 27.2 5.1
 -4 -22 17 9.3 2.7
 -4 -22 18 -4.6 2.6
 4 24 0 710.63 18.9
 -4 24 0 718.83 17.7
 4 24 1 842.32 20.4
 4 24 -1 748.53 19.2
 4 -24 1 782.72 21.4
 4 24 -1 778.92 21.1
 4 24 1 839.92 22.7
 -4 24 -1 785.32 18.8
 4 24 -2 345.07 14.2
 4 -24 2 306.97 13.3
 4 24 2 279.07 11.9
 -4 24 -2 339.67 12.6
 4 24 2 297.77 14
 4 24 3 15.9 2.8
 4 24 3 14.4 3.2
 4 24 -3 16.7 3.1
 4 -24 3 18.5 3.2
 4 24 4 17.5 3.4
 4 24 -4 17.1 3.2
 -4 -24 4 18.4 3.2
 4 -24 4 21.8 3.9
 4 24 4 14.3 3.4
 4 24 5 38.5 5.8
 4 24 5 39.3 4.8
 -4 -24 5 36.7 5.1
 4 -24 5 37.3 5.1
 4 24 6 9 2.9
 4 -24 6 6.1 1.9
 -4 -24 6 6.5 2.2
 4 24 6 7.7 3.1
 4 24 7 97.09 10
 -4 -24 7 87.39 8.1
 4 -24 7 71.49 7.1
 4 24 7 86.29 7.4
 -4 -24 8 56.59 6.7
 4 24 8 46.3 7.3
 4 -24 8 54.49 6.4
 4 24 8 48.9 5.7
 4 24 9 409.96 16.5
 -4 -24 9 373.96 17.5
 4 -24 9 373.06 17
 4 24 9 432.16 23.4
 4 -24 10 273.37 14.6
 -4 -24 10 292.47 16.4
 4 24 11 31.7 6.9
 4 -24 11 36.8 5.4
 -4 -24 11 38.8 6.2
 -4 -24 12 303.17 17
 4 -24 13 12 3.3
 -4 -24 13 0.9 2.6
 -4 -24 14 23.2 5
 4 -24 14 18.2 3.5
 -4 -24 15 -0.3 1.8
 -4 -24 16 2.9 1.8
 -4 -24 17 1.9 1.8
 4 -26 0 765.52 21.9
 4 26 0 830.62 21.2
 4 26 -1 614.94 18.3
 4 26 -1 635.84 20.5
 4 26 1 718.33 19.8
 4 -26 1 646.64 20
 4 26 1 712.53 22.6
 -4 26 -2 285.57 12.4
 4 26 -2 305.17 14.4
 4 26 2 300.27 15.2
 4 26 2 262.67 12.1
 4 -26 2 274.17 13.5
 4 26 3 194.88 10.6
 -4 26 -3 173.78 9.8
 4 26 -3 165.28 10.5
 4 26 3 195.08 12.5
 4 -26 3 193.08 11.5
 4 -26 4 16.9 3.7
 4 26 4 15.6 3.4
 -4 -26 4 14.4 3.3
 4 26 -4 17.8 3.6
 4 26 4 14.8 3.6
 4 26 -5 18.1 3.9
 4 26 5 19.8 3.6
 4 -26 5 16 3.9
 4 26 5 21.6 4.5
 -4 -26 5 15.8 3.4
 4 26 6 5.6 2.4
 4 26 -6 7.3 3.1
 4 -26 6 2.9 2.2
 -4 -26 6 0.7 1.5
 4 26 6 2.2 1.8
 4 26 7 24.6 4.1
 4 26 7 25.1 5.4
 4 -26 7 14.2 3.2
 -4 -26 7 21.7 4.3
 4 -26 8 422.06 18.4
 -4 -26 8 426.26 18.9
 4 26 8 328.37 20
 4 26 8 340.87 15.1
 -4 -26 9 324.27 16.9
 4 -26 9 324.27 16.4
 4 26 9 352.36 21.6
 4 26 9 350.66 15.5
 -4 -26 10 444.56 20.3
 4 -26 10 423.16 18.7
 4 -26 11 198.28 13.2
 -4 -26 11 194.98 13.4
 -4 -26 12 63.09 7.8
 -4 -26 13 69.99 8.1
 4 -26 13 73.99 7.5
 4 -26 14 40.3 5.4
 -4 -26 14 55.99 7.4
 -4 -26 15 11.8 3.5
 -4 -26 16 -1.4 1.9
 -4 -26 17 1 1.3
 4 28 0 298.57 13.4
 4 28 0 312.17 15.6
 4 28 1 623.34 19.4
 4 28 -1 572.94 18.6
 4 28 -1 571.44 20.9
 4 28 1 612.64 22.6
 4 -28 1 612.54 20.1
 4 28 2 151.28 9.7
 4 28 -2 183.38 11.6
 4 28 2 154.88 11.6
 4 -28 2 187.28 11.7
 -4 28 -3 86.49 7.5
 4 28 -3 84.59 8
 4 -28 3 104.99 8.9
 4 28 3 93.39 7.6
 -4 -28 3 86.79 7.4
 4 28 3 91.49 9.2
 4 28 4 5.2 2.4
 -4 28 -4 7.1 2.5
 4 28 4 3.2 1.4
 4 28 -4 3 1.9
 4 -28 4 3.9 2.1
 -4 -28 4 4.5 2.1
 4 28 -5 9.5 2.8
 4 28 5 11.5 3.4
 4 28 5 11.6 3.7
 -4 -28 5 9.2 2.3
 4 -28 5 8.4 3.2
 4 28 6 14.3 4.3
 4 28 6 18 3.7
 -4 -28 6 19.6 4.2
 4 -28 6 18.3 4.1
 4 28 -6 22.1 4.7
 4 28 -7 43.2 6.3
 4 28 7 49.2 8
 4 -28 7 40.9 6
 -4 -28 7 44.4 6
 4 28 7 50.39 6.1
 4 28 -8 62.29 7.8
 4 -28 8 73.39 7.8
 4 28 8 61.39 6.9
 -4 -28 8 68.19 7.8
 4 28 8 45.7 8
 4 -28 9 155.78 11.4
 -4 -28 9 141.39 11.7
 4 28 9 144.09 14.2
 4 -28 10 454.45 19.7
 -4 -28 10 462.35 21.1
 4 -28 11 100.79 9.4
 -4 -28 11 95.19 9.7
 -4 -28 12 232.68 14.8
 4 -28 13 5.5 2.7
 -4 -28 13 3.8 1.7
 -4 -28 14 13.7 3.7
 -4 -28 15 0.1 1.7
 -4 -28 16 1.2 1.6
 4 30 0 58.79 6.3
 4 30 0 59.69 7.4
 4 -30 0 52.09 5.9
 4 30 1 116.89 8.7
 4 30 1 105.39 9.9
 4 -30 1 114.79 9.2
 4 30 -1 98.79 9.4
 4 -30 2 13.5 3.7
 4 30 2 13 3.7
 4 30 2 10.7 2.8
 4 30 -2 15.4 3.4
 4 30 3 15.4 3.9
 4 30 3 14.8 3.4
 4 30 -3 12.3 3.3
 4 -30 3 12.2 3.4
 -4 -30 3 14.2 3.7
 4 30 4 2.4 1.8
 4 30 4 2.6 1.9
 4 30 -4 -0.7 2.3
 -4 -30 4 4.1 2.4
 4 -30 4 1.6 1.8
 4 30 5 14.9 4.3
 4 30 5 14.1 3.2
 4 30 -5 10.6 3.4
 4 -30 5 16.9 4.1
 -4 -30 5 14.9 3.5
 4 30 6 10.9 3.8
 4 30 6 14.2 3.8
 4 30 -6 10.5 3.5
 4 -30 6 11.5 3.7
 -4 -30 6 10.8 2.8
 4 30 -7 32.6 5.9
 4 30 7 30.8 6.5
 4 -30 7 33.2 5.4
 -4 -30 7 31.8 5.4
 4 30 7 41.7 5.5
 4 -30 8 25.7 4.5
 -4 -30 8 24.4 4.6
 4 30 8 24.7 6.2
 4 -30 9 43.4 6.3
 -4 -30 9 45.1 6.9
 4 -30 10 97.49 9.4
 -4 -30 10 104.49 10.4
 -4 -30 11 71.89 8.6
 4 -30 11 66.79 7.8
 -4 -30 12 136.79 11.4
 -4 -30 13 -2.4 2.3
 4 -30 13 3.5 2.2
 -4 -30 14 44.3 6.2
 -4 -30 15 18.4 4
 -4 -30 16 14.1 3.3
 4 32 0 1.6 1.9
 4 32 0 0.1 1.5
 4 32 1 2.4 2.2
 4 -32 1 0.1 1.7
 4 32 -1 0.9 1.7
 4 32 1 0.7 2.1
 4 32 2 68.89 7
 4 32 -2 97.29 10
 4 -32 2 83.49 8.5
 4 32 2 65.29 8.7
 -4 -32 2 85.79 8.3
 -4 -32 3 43.5 6.3
 4 32 3 33.3 6.2
 4 -32 3 46.5 6.4
 4 32 -3 34.9 5.9
 4 32 3 36.7 5.2
 4 -32 4 16.9 4.2
 -4 -32 4 12.1 3.6
 4 32 4 15 3.8
 4 32 4 15.3 4.2
 4 32 -4 12.6 3.5
 4 32 5 64.49 9.2
 4 32 -5 60.19 7.9
 4 -32 5 63.99 7.8
 -4 -32 5 61.39 7.4
 4 32 5 72.29 7.2
 4 32 6 214.88 16.9
 4 32 -6 287.17 17.9
 4 32 6 239.48 13.1
 4 -32 6 286.87 15.7
 -4 -32 6 286.07 15.9
 -4 -32 7 198.98 13.1
 4 -32 7 223.08 14.3
 -4 -32 8 27.6 5.5
 4 -32 8 28.6 4.9
 4 -32 9 -2.1 2.9
 -4 -32 9 3 2.7
 4 -32 10 57.29 7.4
 -4 -32 10 56.29 7.4
 4 -32 11 4.5 1.9
 -4 -32 11 3.3 2.6
 -4 -32 12 0.8 2
 -4 -32 13 -1 2.1
 -4 -32 14 89.59 8.3
 -4 -32 15 68.39 7
 4 34 0 9.4 3.4
 -4 -34 1 188.88 12.2
 4 -34 1 190.08 12.5
 4 34 -1 193.58 15
 4 34 1 189.18 15.4
 4 34 1 201.28 12
 4 -34 2 25 5
 4 34 2 34 6.1
 4 34 -2 27.7 5.7
 4 34 2 33.3 5.2
 -4 -34 2 27.8 4.9
 4 34 3 24.4 4.4
 4 34 -3 17.5 4.1
 4 34 3 15.9 4.4
 4 -34 3 19.6 4
 -4 -34 3 17.9 3.9
 4 -34 4 48.9 6.8
 4 34 4 37.5 7
 4 34 -4 43.8 7.1
 -4 -34 4 39.7 6
 4 34 4 42.2 5.8
 4 -34 5 475.65 20.7
 -4 -34 5 461.55 20.4
 4 34 5 468.65 18.4
 4 -34 6 535.05 22
 -4 -34 6 523.25 21.5
 -4 -34 7 99.29 9.5
 4 -34 7 100.49 9.9
 -4 -34 8 178.58 12.8
 4 -34 8 186.88 13.2
 4 -34 9 -0.4 1.9
 -4 -34 9 0.4 1.8
 4 -34 10 0.8 2.2
 -4 -34 10 0.3 2.4
 -4 -34 11 2.3 2
 -4 -34 12 12 3.3
 -4 -34 13 10.9 2.9
 -4 -34 14 109.49 8.7
 -4 -36 0 44.5 6.5
 4 36 1 7.4 2.9
 4 -36 1 5.9 2.6
 -4 -36 1 8.7 3.3
 4 36 2 26.5 4.6
 -4 -36 2 25.2 5.2
 4 -36 2 29.4 4.8
 -4 -36 3 63.59 7.5
 4 -36 3 64.89 7.5
 4 36 3 65.69 7
 -4 -36 4 155.68 12
 4 -36 4 145.79 11.7
 4 -36 5 349.27 17.6
 -4 -36 5 376.06 18.7
 4 -36 6 138.59 11.5
 -4 -36 6 133.89 11
 4 -36 7 120.29 10.9
 -4 -36 7 122.09 10.8
 4 -36 8 26.3 4.9
 -4 -36 8 25.1 4.7
 4 -36 9 -1 2.6
 -4 -36 9 2 1.9
 4 -36 10 -1.2 2.5
 -4 -36 10 -0.4 1.6
 -4 -36 11 -0.9 2.1
 -4 -36 12 29.4 4.8
 -4 -36 13 7.8 2.8
 -4 -36 13 -1.4 1.8
 -4 -38 0 12.7 4.1
 -4 -38 1 44.1 6.6
 -4 -38 -1 32.6 5.3
 4 -38 2 3.6 1.8
 -4 -38 2 3.5 2.5
 -4 -38 -2 -1.8 2.5
 -4 -38 3 175.98 12.6
 4 -38 3 173.78 12.3
 4 -38 4 85.49 8.8
 -4 -38 4 94.49 9.5
 4 -38 5 67.89 7.7
 -4 -38 5 62.09 7.5
 4 -38 6 71.09 8
 -4 -38 6 66.59 8
 -4 -38 7 7.9 2.7
 4 -38 7 5 2.2
 4 -38 8 -1.3 2.8
 -4 -38 8 2.1 2.1
 4 -38 9 0.7 1.7
 -4 -38 9 -2 2.8
 -4 -38 10 23.6 4.4
 -4 -38 11 -1.6 2
 -4 -38 12 -1.2 2.1
 -4 -40 0 29.3 6
 -4 -40 1 410.46 19
 -4 -40 -1 390.86 18.8
 -4 -40 -2 1.3 2
 4 -40 2 0.8 1.4
 -4 -40 2 0.7 2
 4 -40 3 4.1 2
 -4 -40 3 6.4 2
 -4 -40 4 4.4 2
 4 -40 4 8.6 3
 -4 -40 -4 5.9 2.6
 -4 -40 -5 23.7 4.5
 4 -40 5 20.7 4.3
 -4 -40 5 20.3 4.3
 -4 -40 6 -1.1 2.3
 4 -40 6 0.3 2.3
 -4 -40 -6 1.2 1.4
 4 -40 7 -1.9 2.8
 -4 -40 7 0.7 2.4
 4 -40 8 54.59 6.7
 -4 -40 8 54.09 7
 4 -40 9 9.4 2.6
 -4 -40 9 12.1 3.2
 -4 -40 10 112.09 9.1
 -4 -40 11 1.8 1.3
 -4 -42 0 15.3 4.7
 -4 -42 1 368.76 18.3
 -4 -42 -1 347.57 17.5
 -4 -42 -2 7.9 3.1
 -4 -42 2 8.3 3.4
 4 -42 3 10.9 3.1
 -4 -42 3 9.9 2.7
 -4 -42 -3 17.6 4.2
 4 -42 4 -4.2 2.5
 -4 -42 4 -0.1 2.3
 -4 -42 -4 1.5 1.8
 -4 -42 5 4.6 2.6
 -4 -42 -5 2.2 1.8
 4 -42 6 1 2.1
 -4 -42 6 8.4 3
 4 -42 7 38.2 5.7
 -4 -42 7 42.2 6.1
 -4 -42 8 171.88 11.4
 4 -42 8 178.38 11.8
 -4 -42 9 36.4 5.3
 -4 -42 10 184.88 10.9
 -4 -44 0 12.5 4.2
 -4 -44 1 392.26 18.3
 -4 -44 -1 386.16 18.3
 -4 -44 -2 40.4 5.8
 -4 -44 2 35 5.4
 -4 -44 3 53.39 6.5
 -4 -44 -3 46.8 6
 -4 -44 4 2.3 1.7
 -4 -44 -4 0.3 1.3
 4 -44 5 0.1 1.9
 -4 -44 5 2.3 2.1
 4 -44 6 1.5 1.3
 -4 -44 6 5.6 2.7
 4 -44 7 11.5 2.9
 -4 -44 7 15.9 3.6
 -4 -44 8 143.99 9.8
 -4 -46 0 10.6 3
 -4 -46 -1 103.79 8.8
 -4 -46 1 110.99 9.3
 -4 -46 2 2.2 1.8
 -4 -46 -2 0.2 1.5
 -4 -46 3 2.6 2
 -4 -46 -3 2.4 1.8
 -4 -46 4 -0.5 1.4
 -4 -46 5 4.6 2.6
 -4 -46 6 -1.9 1.7
 -4 -48 1 18.1 3.7
 -4 -48 2 1.5 1.7
 5 -1 0 31.4 1.9
 5 1 0 30.1 2.1
 5 1 1 1825.82 17.7
 5 -1 1 1846.42 17.2
 5 1 -1 1850.01 14.4
 5 -1 -1 1860.11 12.7
 5 -1 -2 188.68 3.8
 5 -1 2 205.38 6.6
 5 1 2 198.88 6.6
 5 -1 3 5882.21 40.1
 5 1 3 5776.92 39.5
 5 -1 4 1102.99 19.1
 5 1 4 1122.59 19.2
 5 1 5 499.55 14.1
 5 -1 5 495.95 14.2
 5 -1 6 218.38 10.6
 5 1 6 219.48 10
 5 -1 7 176.08 9.8
 5 1 7 180.48 9.7
 -5 1 8 47 4.8
 -5 -1 8 43.4 4.6
 5 1 8 54.99 5.7
 -5 -1 9 0.8 1.1
 -5 1 9 1.8 1.6
 -5 1 10 7.2 2.1
 -5 -1 10 7 1.9
 -5 1 11 1.3 1.6
 -5 -1 11 3.2 2.1
 5 1 12 20.8 3.7
 -5 1 12 23.9 4.2
 -5 -1 12 22.9 4.1
 -5 1 13 -0.1 2.4
 -5 -1 13 2.6 1.5
 -5 1 14 349.17 16.4
 -5 -1 14 338.67 16.7
 -5 1 15 135.19 11.2
 -5 -1 15 148.49 11.3
 -5 1 16 308.37 17
 -5 -1 16 284.07 16.9
 -5 1 17 71.39 8.1
 -5 -1 17 69.39 8.3
 -5 -1 18 16.9 4
 -5 1 18 20.1 4.1
 -5 -1 19 -7.6 2.7
 5 3 0 55.79 3.1
 5 -3 0 51.89 2.6
 5 3 1 6.5 1.2
 5 -3 1 6.5 1.2
 5 -3 -1 4.5 0.5
 5 3 -1 8 1.1
 5 -3 2 138.49 5.6
 5 3 2 117.39 5.2
 5 3 3 53.79 4
 5 -3 3 64.39 4.3
 5 -3 4 415.66 12.2
 5 3 4 402.16 11.4
 5 -3 5 1378.66 24.1
 5 3 5 1356.66 22.9
 5 3 6 476.15 14.5
 5 3 7 48 5
 -5 -3 8 10 2.5
 5 3 8 12.5 2.8
 -5 3 8 12.4 2.3
 -5 -3 9 96.49 7.2
 -5 3 9 82.39 7.1
 5 3 9 91.69 8.4
 -5 3 10 273.67 12.5
 -5 -3 10 265.87 12.5
 -5 -3 11 6.8 2.2
 5 3 11 7.7 2.4
 -5 3 11 1.9 1.7
 5 3 12 23.9 4
 -5 3 12 17.8 3.5
 -5 -3 12 20.6 3.7
 5 3 13 0.4 1.5
 -5 3 13 -0.9 2.7
 -5 -3 13 -1.8 2.3
 -5 3 14 112.79 10
 -5 -3 14 128.49 10.4
 -5 3 15 14 4.4
 -5 -3 15 20.7 4.2
 -5 -3 16 325.47 16.7
 -5 3 16 289.87 16.7
 -5 3 17 131.29 10.6
 -5 -3 17 110.49 10.2
 -5 -3 18 -0.4 2.2
 -5 3 18 -1.3 2.1
 -5 -3 19 19.3 4
 5 5 0 7.1 1.2
 5 5 1 464.75 10
 5 5 -1 470.25 8.8
 5 5 2 25.5 2.9
 5 5 3 296.87 9.2
 5 5 4 130.89 6.6
 5 5 5 67.29 5.3
 5 5 6 110.29 7.2
 5 5 7 7.9 2.4
 -5 5 8 625.24 17.5
 5 5 8 638.34 19.7
 -5 -5 9 107.29 7.7
 5 5 9 86.99 8.1
 -5 5 9 86.89 6.8
 5 5 10 700.83 24.5
 -5 5 10 748.83 20.5
 5 5 10 673.93 18.9
 -5 -5 10 750.42 21.3
 -5 -5 11 20.4 3.9
 -5 5 11 15.6 3.3
 5 5 11 18.9 3.7
 -5 -5 12 30 4.7
 5 5 12 19.1 4.4
 -5 5 12 19.1 3.9
 5 5 13 2.5 1.5
 -5 -5 13 2.5 1.7
 -5 5 13 3 1.9
 -5 5 14 20.9 4.4
 -5 -5 14 20.9 4.3
 -5 5 15 73.89 7.9
 -5 -5 15 59.19 7.9
 -5 5 16 201.68 13.3
 -5 -5 16 211.48 13.7
 -5 5 17 17.2 4.1
 -5 -5 17 16.5 4
 -5 -5 18 42.6 6.2
 -5 -5 19 133.49 9.9
 -5 -5 20 58.29 6.1
 5 7 0 153.98 5.7
 5 7 -1 867.61 12.8
 5 7 1 907.71 14.8
 5 7 2 82.49 4.9
 5 7 3 129.79 6.3
 5 7 4 162.98 7.8
 5 7 5 145.69 7.8
 5 7 6 56.89 5.2
 5 7 7 7.4 2.2
 5 7 8 192.28 11
 -5 7 8 191.08 9.6
 -5 7 9 365.06 13.9
 5 7 9 348.77 15.7
 -5 7 10 1678.33 31.1
 5 7 10 1693.73 38.1
 -5 -7 10 1777.02 33
 5 7 11 45.7 6.8
 5 7 11 54.59 6.2
 -5 7 11 53.69 5.9
 -5 -7 11 56.49 6.5
 -5 7 12 753.82 22.7
 -5 -7 12 776.92 24.4
 -5 -7 13 17.3 3.7
 -5 7 13 18.3 4.1
 -5 7 14 13.4 4
 -5 -7 14 13.8 3.2
 -5 7 15 77.89 8.7
 -5 -7 15 87.19 8.9
 -5 7 16 66.39 7.6
 -5 -7 16 69.19 8.1
 -5 -7 17 11.7 3.5
 -5 -7 18 56.09 7
 -5 -7 19 284.77 14.4
 -5 -7 20 71.29 6.9
 5 9 0 137.19 5.7
 5 9 1 1862.41 22.1
 5 9 -1 1831.52 19.8
 5 9 2 305.27 9.6
 5 9 3 355.56 11
 5 9 4 37.5 3.9
 5 9 5 0.9 1.2
 5 9 6 38.1 4.2
 5 -9 7 121.49 7.9
 5 9 7 125.09 8.4
 5 9 8 117.89 7.5
 -5 9 8 117.49 7.6
 5 9 8 112.69 8.4
 5 9 9 189.28 9.9
 -5 9 9 208.58 10.5
 5 9 9 204.18 12.3
 5 9 10 1612.24 37.2
 -5 9 10 1573.84 30.5
 -5 -9 11 245.48 13.3
 -5 9 11 225.08 12.3
 -5 9 12 710.43 22.3
 -5 -9 12 700.53 23.2
 -5 -9 13 3.3 2.6
 -5 9 13 5.1 2.8
 -5 9 14 153.38 11.6
 -5 -9 14 154.58 12.2
 -5 9 15 3 1.7
 -5 -9 15 1.3 2.5
 -5 -9 16 -8.1 4.4
 -5 -9 17 3.5 2.4
 -5 -9 18 109.49 9.9
 -5 -9 19 163.98 10.8
 5 11 0 283.97 8.7
 5 11 -1 1155.88 16.9
 5 11 1 1167.88 18.2
 5 11 2 220.68 8.5
 5 11 3 78.39 5.4
 5 11 4 13.2 2.4
 5 11 5 83.79 6.1
 5 11 6 971.5 22.2
 5 11 7 8.9 2.1
 -5 11 7 8.2 2.1
 5 -11 7 12.5 2.4
 5 11 7 8.4 1.7
 5 11 8 209.88 12
 5 11 8 208.48 10.2
 -5 11 8 194.28 10
 5 -11 8 192.78 10.4
 5 11 9 193.28 10.3
 5 11 9 205.88 12.7
 -5 -11 9 229.18 12.4
 -5 11 9 212.38 10.8
 5 11 10 1457.35 35.9
 -5 11 10 1432.76 29.8
 5 11 10 1489.85 29.1
 -5 -11 11 164.08 11.4
 5 11 11 139.29 12.5
 5 -11 11 138.99 9.2
 -5 11 11 171.78 10.7
 5 11 12 245.18 17.2
 -5 11 12 276.97 14.1
 -5 -11 12 263.87 14.6
 -5 -11 13 18.6 4.4
 -5 11 13 15.2 3.9
 -5 -11 14 4.8 2.3
 -5 -11 15 15.8 3.6
 -5 -11 16 26 4.8
 -5 -11 17 16.9 4.4
 -5 -11 18 11.3 3.4
 -5 -11 19 132.39 9.5
 5 13 0 143.79 6.6
 5 13 -1 1302.67 19.2
 5 13 1 1248.38 20.1
 5 13 -2 0.1 0.9
 5 13 2 0.9 1.2
 -5 13 2 0.9 0.4
 -5 13 3 80.89 2.7
 5 13 3 137.59 7.3
 5 13 4 60.39 5.1
 5 13 5 1675.63 28.6
 5 13 6 1053.59 21.2
 5 13 6 1027.8 24.1
 5 13 7 204.08 9.6
 5 -13 7 220.58 10.9
 5 13 7 188.98 11
 5 13 8 24 3.6
 5 13 8 20.3 3.9
 5 -13 8 17.4 3.1
 -5 -13 8 14.9 2.3
 5 13 9 225.88 11.4
 -5 -13 9 247.98 13.1
 -5 -13 10 491.85 18.9
 5 13 10 542.75 22.5
 5 13 10 565.14 18.4
 5 13 11 21.8 3.9
 5 -13 11 16.7 3.5
 5 13 11 18.4 5.2
 5 -13 12 0.3 1.5
 -5 -13 12 0.5 2.6
 5 13 12 1.8 2.3
 -5 -13 13 10.4 3.6
 -5 -13 14 102.09 9.5
 -5 -13 15 64.29 8.1
 -5 -13 16 157.58 12
 -5 -13 17 4.8 2.1
 -5 -13 18 4 2.2
 -5 -13 19 13.8 2.9
 -5 15 0 152.58 5.3
 5 15 0 151.08 7.2
 5 15 1 7.1 2.2
 5 15 -1 3.5 1.3
 -5 15 1 4.5 1
 5 15 -2 23.6 2.9
 -5 15 2 21.8 1.8
 5 15 3 414.06 13.6
 5 15 4 1758.52 29
 5 15 5 1233.08 22.5
 5 15 5 1210.18 25.4
 5 15 6 996.2 21.3
 5 15 6 945.91 24.1
 5 -15 6 917.21 21.8
 5 15 7 466.95 15.1
 5 -15 7 537.25 17.3
 5 15 7 463.05 17.8
 -5 -15 7 568.44 18.3
 5 15 8 3.6 1.7
 5 15 8 -0.5 2.1
 5 -15 8 1.5 1.5
 -5 -15 8 -0.1 1.7
 5 15 9 34.9 5.4
 5 15 9 35 4.8
 5 -15 9 40.3 5.2
 -5 -15 9 42.7 5.8
 5 15 10 101.39 10
 -5 -15 10 100.59 9
 5 15 10 108.69 8.3
 5 15 11 4.2 2.6
 5 15 11 0 1.8
 -5 -15 11 0.2 1.8
 5 -15 12 3.7 1.9
 5 15 12 3.1 2.4
 -5 -15 13 84.59 9.1
 -5 -15 14 331.47 17.4
 -5 -15 15 227.68 14.8
 -5 -15 16 375.86 18.5
 -5 -15 17 58.39 7.1
 -5 -15 18 12.1 3.4
 -5 -15 19 2.1 1.6
 5 17 0 78.89 5.5
 -5 17 0 78.09 4.1
 -5 17 1 52.59 3.3
 5 17 -1 45.3 4.4
 5 17 1 54.49 4.8
 5 17 -2 33.9 3.7
 5 17 2 40.4 4.4
 5 17 -3 2398.16 29.6
 5 17 3 2201.78 32.9
 5 17 4 1177.08 21.8
 5 17 4 1136.19 24.8
 5 17 5 1345.97 28
 5 -17 5 1556.14 28
 5 17 5 1351.26 24.4
 -5 -17 5 1613.74 27.9
 5 17 6 1204.58 28.6
 5 17 6 1245.18 23.9
 5 -17 6 1102.19 24.8
 -5 -17 6 1118.39 25.2
 5 17 7 359.06 13.7
 -5 -17 7 449.76 16.8
 5 -17 7 414.16 15.5
 5 17 7 349.47 16.1
 5 17 8 97.69 7.5
 -5 -17 8 86.59 7.4
 5 -17 8 83.09 7.2
 5 17 8 93.49 8.8
 5 17 9 3.9 2.2
 5 -17 9 3.3 1.8
 5 17 9 0.3 2.3
 -5 -17 9 6.7 2.9
 5 17 10 46.7 7.1
 -5 -17 10 45.7 6.4
 5 17 10 48 5.8
 -5 -17 11 1.2 1.7
 5 17 11 1.9 1.7
 5 17 12 72.39 10.6
 -5 -17 12 74.19 8
 5 -17 12 77.99 7.4
 -5 -17 13 116.09 10.4
 -5 -17 14 433.86 20.1
 -5 -17 15 399.36 19.3
 -5 -17 16 449.56 20.3
 -5 -17 17 120.69 10
 -5 -17 18 35.5 5.2
 -5 -17 19 -1.4 1.7
 -5 19 0 82.79 4.8
 5 19 0 77.49 5.8
 5 19 -1 65.59 5.3
 5 19 1 54.59 5
 5 19 -2 213.58 9.5
 5 19 2 256.47 11.3
 5 19 3 629.14 16.3
 5 -19 3 611.14 17.8
 5 19 3 631.04 18.6
 5 19 4 804.82 18.9
 5 19 4 807.32 22.3
 5 19 5 817.02 23.1
 5 -19 5 978.7 23.3
 5 19 5 788.32 19.3
 -5 -19 5 967 22.8
 5 19 6 918.01 21.2
 5 19 6 907.61 25.7
 -5 -19 6 842.62 22.6
 5 19 7 482.45 16.2
 5 19 7 460.95 19.2
 5 -19 7 562.44 18.7
 -5 -19 7 598.74 19.9
 5 19 8 36.3 4.7
 5 19 8 33 5.6
 -5 -19 8 24.9 3.8
 5 -19 8 28 4.4
 5 19 9 22.3 4
 5 19 9 23.6 5
 5 -19 9 23.8 4
 -5 -19 9 32.9 5.3
 5 -19 10 39.3 5.2
 -5 -19 10 44.9 6.5
 5 19 10 43.9 7.4
 5 19 10 48.2 5.9
 5 19 11 0.4 2
 -5 -19 11 1.1 2.1
 5 19 12 6.3 3.1
 -5 -19 12 14.7 3.6
 5 -19 12 15.1 3.7
 -5 -19 13 74.09 8.1
 -5 -19 13 78.59 9.3
 -5 -19 14 237.18 15.1
 -5 -19 15 394.16 18.9
 -5 -19 16 383.06 18.5
 -5 -19 17 135.99 10.6
 -5 -19 18 11.8 3
 5 21 0 897.11 21
 -5 21 -1 266.97 9.5
 5 21 -1 259.87 11.2
 5 21 1 264.67 11.7
 5 21 2 28.3 4
 5 21 2 25 3.3
 5 21 -2 21 3
 5 -21 2 20.5 3.5
 5 -21 3 193.18 10.4
 5 21 3 174.58 9
 5 21 -3 207.18 10.1
 5 21 3 179.68 10.5
 5 21 4 672.03 18.1
 5 21 4 701.93 21.8
 5 21 5 472.35 18.5
 5 21 5 459.85 15.1
 5 -21 5 594.84 18.7
 -5 -21 5 562.94 18
 5 21 6 381.56 14.2
 5 21 6 372.86 17.4
 5 -21 6 325.37 14.2
 -5 -21 6 333.87 14.8
 5 -21 7 97.59 8.1
 5 21 7 81.69 6.9
 5 21 7 81.19 8.4
 -5 -21 7 107.59 8.8
 5 21 8 2.6 1.8
 5 -21 8 -0.4 1.9
 5 21 8 5.7 2.5
 -5 -21 8 0.1 1.8
 5 21 9 19 3.8
 5 21 9 17.1 4.6
 5 -21 9 19.2 3.5
 -5 -21 9 27.8 5.2
 5 21 10 183.08 15.2
 5 -21 10 163.78 11.4
 -5 -21 10 171.08 12.2
 5 21 10 183.18 11.4
 5 21 11 75.69 10.1
 -5 -21 11 83.29 8.5
 -5 -21 12 20.9 4.1
 -5 -21 13 8.7 4
 -5 -21 13 3.1 2.5
 -5 -21 14 110.69 10.4
 -5 -21 15 203.88 13.6
 -5 -21 16 172.58 12.2
 -5 -21 17 53.09 6.6
 -5 -21 18 -0.7 1.8
 5 23 0 951.3 23.3
 5 23 -1 1297.27 26.8
 5 23 1 1255.77 27.4
 5 23 1 1202.48 24.2
 5 23 2 119.29 7.7
 5 23 -2 105.39 7.8
 5 23 2 124.09 8.9
 -5 23 -2 101.89 6.4
 5 -23 2 114.09 8.2
 5 23 3 45.4 4.8
 5 23 -3 56.69 5.5
 5 -23 3 52.29 5.7
 5 23 3 49.5 5.7
 5 23 -4 183.88 10.3
 5 23 4 214.98 10.5
 5 -23 4 210.28 11.7
 5 23 4 215.98 12.8
 5 23 5 328.37 16.3
 5 23 5 334.17 13.6
 5 23 -5 409.66 15.6
 5 -23 5 414.06 16.4
 -5 -23 5 420.06 16.2
 5 23 6 98.19 7.7
 5 23 6 90.89 8.9
 5 -23 6 77.49 7.1
 -5 -23 6 84.59 7.7
 5 23 7 1.3 1.7
 5 23 7 1.3 2
 5 -23 7 -4 2.4
 -5 -23 7 0.3 1.7
 5 23 8 35.6 5.1
 -5 -23 8 27.8 4.6
 5 23 8 38.5 6.7
 5 -23 8 26.1 4.4
 5 -23 9 139.39 10.3
 -5 -23 9 157.78 11.7
 5 23 9 122.99 12.3
 5 23 9 124.89 9.2
 5 23 10 331.17 21.3
 5 -23 10 313.17 15.9
 -5 -23 10 309.47 16.9
 5 23 10 347.37 15.7
 5 23 11 266.67 19.9
 -5 -23 11 333.17 17.4
 -5 -23 12 55.99 7.4
 -5 -23 13 3.7 1.6
 -5 -23 14 3.8 2.1
 -5 -23 15 63.59 7.6
 -5 -23 16 32.4 5.2
 -5 -23 17 4.8 2
 5 25 0 2339.97 35
 5 25 0 2272.67 38.8
 5 25 -1 725.03 19.5
 5 25 1 722.13 19.6
 5 -25 1 692.73 20.9
 5 25 -2 382.56 15.5
 5 25 2 409.06 14.8
 5 -25 2 401.86 16.1
 5 25 2 416.86 17.6
 5 25 -3 43.3 5.3
 5 25 3 36.3 4.4
 5 -25 3 46.8 5.7
 5 25 3 35.9 5.2
 5 25 4 85.19 7
 5 25 -4 58.79 6.2
 5 -25 4 78.89 7.5
 5 25 4 71.59 7.6
 -5 -25 4 67.79 6.5
 5 25 -5 79.29 7.4
 5 25 5 62.29 6.1
 5 25 5 60.89 7.3
 5 -25 5 75.69 7.4
 -5 -25 5 77.99 7.3
 5 25 6 95.99 7.8
 5 25 -6 72.29 7.3
 5 25 6 81.09 9
 -5 -25 6 77.09 7.6
 5 -25 6 75.99 7.4
 5 25 7 0.7 2.1
 5 25 7 3.6 2.2
 5 -25 7 2.6 1.7
 -5 -25 7 2.8 2.4
 5 25 8 277.67 18.4
 5 -25 8 242.28 13.8
 -5 -25 8 230.68 13.8
 5 25 8 282.97 13.6
 5 -25 9 752.22 24.6
 -5 -25 9 757.92 25.8
 5 25 9 596.24 28.1
 5 25 9 653.83 21.3
 -5 -25 10 388.16 19.2
 5 25 10 395.26 24
 5 -25 10 377.16 18
 -5 -25 11 260.07 15.4
 -5 -25 12 101.29 9.9
 -5 -25 13 80.59 8.8
 -5 -25 14 8.7 3.4
 -5 -25 15 5.9 2.8
 -5 -25 16 4.8 2.1
 -5 -25 17 -0.4 1.8
 5 27 0 1251.57 26.6
 5 27 0 1197.98 29.9
 5 27 -1 635.74 18.9
 5 27 1 610.64 18.4
 5 27 1 673.93 23.1
 5 -27 1 599.84 20.1
 5 27 2 313.67 13.4
 5 27 -2 287.97 14.4
 5 -27 2 333.17 14.9
 5 27 2 338.37 16.9
 5 27 3 34.3 5.3
 5 27 -3 44.2 5.5
 5 -27 3 43.5 5.8
 5 27 3 36.5 4.8
 -5 -27 4 -2 2.4
 5 27 4 -1.2 1.4
 5 27 4 -1.6 2.3
 5 -27 4 0.5 2
 5 27 -4 -0.7 1.6
 5 27 5 50.39 6
 5 27 -5 58.39 6.7
 5 27 5 44.8 6.6
 5 -27 5 58.19 6.7
 -5 -27 5 58.69 6.6
 5 27 6 42.8 5.5
 5 27 -6 36.3 5.5
 5 27 6 41.3 6.8
 5 -27 6 42.8 5.8
 -5 -27 6 39.7 5.7
 5 27 -7 1.7 2.1
 5 27 7 2.4 1.5
 5 27 7 3.9 2
 5 -27 7 -1 2.1
 -5 -27 7 -0.6 2
 5 27 -8 306.27 16.6
 5 -27 8 310.07 16.1
 -5 -27 8 286.17 15.7
 5 27 8 341.27 21.1
 5 27 8 338.97 15.2
 5 -27 9 803.12 26
 -5 -27 9 792.72 26.8
 5 -27 10 350.56 17.6
 -5 -27 10 353.56 18.6
 -5 -27 11 338.27 17.8
 -5 -27 12 49.7 7.3
 -5 -27 13 88.09 8.9
 -5 -27 14 -3.9 3.2
 -5 -27 15 3 2.4
 -5 -27 16 3 2.1
 5 29 0 820.42 22.5
 5 29 0 772.42 25.8
 5 29 1 173.48 10.4
 5 29 -1 178.78 10.4
 5 29 -1 209.08 13.3
 5 -29 1 176.68 11.2
 5 29 1 194.48 13.3
 5 29 2 185.28 10.8
 5 -29 2 200.98 12.1
 5 29 -2 173.38 11.8
 5 29 2 170.08 12.9
 5 29 3 -0.3 1.5
 5 29 3 -0.3 2
 5 29 -3 -0.5 1.8
 5 -29 3 4.1 2.3
 5 29 4 27.3 4.5
 5 -29 4 26.3 4.7
 5 29 -4 20.1 4.2
 5 29 4 26.8 5.1
 -5 -29 4 23.7 4.5
 5 29 5 33.5 5.3
 5 29 -5 30 5.2
 5 -29 5 35.9 5.5
 5 29 5 27.4 5.4
 -5 -29 5 29.6 5.1
 5 29 6 74.79 7.4
 5 29 -6 57.39 7.3
 -5 -29 6 64.79 7.3
 5 29 6 78.99 10
 5 -29 6 69.39 7.7
 5 29 7 4.5 2.5
 5 29 -7 2.4 2.3
 5 29 7 2.7 2.8
 5 -29 7 -1.2 2
 -5 -29 7 -1.7 2.8
 5 29 -8 59.09 7.9
 5 -29 8 60.59 7.2
 -5 -29 8 60.99 7.6
 5 29 8 58.99 9.2
 5 29 8 69.99 7.4
 5 -29 9 177.28 12.5
 -5 -29 9 172.58 12.7
 5 -29 10 212.88 14
 -5 -29 10 207.48 14.2
 -5 -29 11 541.45 22.4
 -5 -29 12 32.2 5.6
 -5 -29 13 -2.6 2.8
 -5 -29 14 14.2 4
 -5 -29 15 50.59 6.3
 -5 -29 16 23 4
 5 31 0 227.08 12.3
 5 31 0 220.48 14.8
 5 31 1 31.9 6
 5 31 1 27.2 4.4
 5 31 -1 31.6 5.5
 5 -31 1 24.1 4.6
 5 31 2 27.7 4.4
 5 31 2 31.5 5.9
 5 -31 2 31.4 5.4
 5 31 -2 25.4 5.2
 5 -31 3 11.4 3.4
 5 31 3 7.7 2.9
 5 31 3 8.5 3
 -5 -31 3 7.2 2.5
 5 31 -3 7.1 1.9
 5 31 4 51.49 7.7
 5 31 4 57.99 6.4
 5 31 -4 44 6.5
 -5 -31 4 51.79 6.3
 5 -31 4 52.79 6.7
 5 31 5 134.09 9.6
 5 31 5 128.99 12.6
 5 31 -5 177.98 13.5
 5 -31 5 160.68 11.7
 -5 -31 5 156.28 11.4
 5 31 -6 95.49 10
 5 31 6 102.39 11.8
 5 -31 6 108.69 10
 -5 -31 6 105.89 9.7
 5 31 6 113.59 9.1
 5 -31 7 139.59 11.3
 5 31 7 107.89 12.2
 -5 -31 7 141.79 11
 5 31 7 127.89 9.7
 5 31 8 4.1 2.7
 -5 -31 8 0.9 2.2
 5 -31 8 -1.1 2.3
 5 -31 9 43 6.1
 -5 -31 9 37.5 6.1
 5 -31 10 101.59 9.9
 -5 -31 10 88.49 9.8
 -5 -31 11 264.77 15.8
 -5 -31 12 3.5 1.7
 -5 -31 13 17.3 3.8
 -5 -31 14 67.19 7.5
 -5 -31 15 152.68 10.3
 5 33 0 21.7 4.9
 5 33 0 25.2 4.3
 5 33 1 19.9 4.1
 5 33 1 20.6 4.6
 5 33 -1 22.4 5.3
 5 33 2 12.1 3.3
 5 33 2 6.4 3.3
 5 -33 2 12.1 3.6
 5 33 -2 10.1 3.6
 -5 -33 2 14.4 4.2
 5 33 -3 24.6 5
 5 33 3 18.2 3.8
 5 33 3 16.2 4.4
 5 -33 3 24 4.7
 -5 -33 3 20 4.5
 5 33 4 205.38 16.4
 5 33 -4 181.18 14.1
 5 -33 4 205.88 13.5
 -5 -33 4 200.18 13
 5 33 4 218.88 12.3
 5 33 5 172.08 15.5
 5 -33 5 234.18 14.4
 -5 -33 5 227.38 13.9
 5 33 5 192.28 11.7
 5 -33 6 449.76 20.3
 -5 -33 6 441.76 20.1
 5 33 6 465.25 18.3
 5 -33 7 430.66 19.9
 -5 -33 7 396.66 18.9
 5 -33 8 20.6 4.6
 -5 -33 8 27.6 5.5
 5 -33 9 41.9 6.3
 -5 -33 9 39.9 6.4
 5 -33 10 15.2 3.8
 -5 -33 10 14.4 4
 -5 -33 11 20.3 4.4
 -5 -33 12 0.6 1.9
 -5 -33 13 56.69 6.8
 -5 -33 14 50.79 6.3
 5 35 0 92.19 10.8
 5 35 1 13.5 4.2
 5 35 1 14.5 3.2
 -5 -35 1 16.3 4.2
 5 -35 2 6.6 2.8
 5 35 2 7.8 2.4
 -5 -35 2 14.3 3.9
 5 35 3 30.8 4.8
 5 -35 3 34.5 5.5
 -5 -35 3 33.5 5.6
 5 -35 4 298.17 15.9
 -5 -35 4 292.27 16
 5 35 4 306.27 14.9
 5 -35 5 476.85 20.9
 -5 -35 5 482.15 21.3
 5 -35 6 575.64 23
 -5 -35 6 534.95 21.9
 -5 -35 7 396.76 19.3
 5 -35 7 380.86 19
 5 -35 8 9 2.3
 -5 -35 8 9.6 3.6
 5 -35 9 8.5 3
 -5 -35 9 6.5 3.3
 -5 -35 10 1.3 1.6
 -5 -35 11 5 2.1
 -5 -35 12 -3.8 2.7
 -5 -35 13 50.99 5.9
 -5 -35 13 54.49 6.5
 -5 -35 14 29.9 4.4
 -5 -37 0 370.46 17.9
 5 37 1 5.1 2.4
 -5 -37 1 4.6 3.1
 5 37 2 10.3 3
 -5 -37 2 12.6 3.7
 -5 -37 3 40.2 6.3
 5 -37 3 38.5 5.7
 5 37 3 40.6 5.6
 -5 -37 4 391.36 19
 5 -37 4 375.46 18.2
 5 -37 5 254.47 15.2
 -5 -37 5 265.47 15.9
 5 -37 6 182.68 13
 -5 -37 6 179.88 12.7
 5 -37 7 111.19 9.9
 -5 -37 7 113.49 10.3
 5 -37 8 4.7 1.7
 -5 -37 8 3.1 1.8
 5 -37 9 26.1 4.8
 -5 -37 9 24.6 5.2
 -5 -37 10 2.1 1.8
 -5 -37 11 23.1 4.2
 -5 -37 12 -3.2 2.3
 -5 -37 13 35 4.7
 -5 -39 0 1006.6 30.1
 -5 -39 1 38.6 6.6
 -5 -39 -1 32.1 6
 -5 -39 2 5.5 2.6
 -5 -39 -2 6.9 2.8
 5 -39 3 30.6 5.2
 -5 -39 3 35.1 5.9
 5 -39 4 158.98 11.5
 -5 -39 4 165.08 12.5
 5 -39 5 67.79 7.7
 -5 -39 5 68.69 7.8
 5 -39 6 44.1 6.1
 -5 -39 6 47.3 6.7
 5 -39 7 2.1 2.2
 -5 -39 7 1.5 1.7
 5 -39 8 7.6 2
 -5 -39 8 10.2 3.2
 -5 -39 9 114.19 9.7
 -5 -39 10 11.3 3.1
 -5 -39 11 82.09 7.6
 -5 -41 0 676.23 24.9
 -5 -41 1 33.4 6.3
 -5 -41 -1 33.9 6.2
 -5 -41 2 179.98 12.8
 -5 -41 -2 164.58 12.2
 -5 -41 3 -3.3 2.8
 -5 -41 -3 0.1 1.7
 5 -41 4 27.2 4.6
 -5 -41 4 25.5 4.6
 -5 -41 -4 28.9 5
 5 -41 5 17.5 3.7
 -5 -41 5 21.5 4.5
 -5 -41 -5 19 4.2
 5 -41 6 0.2 2.2
 -5 -41 6 2 1.8
 -5 -41 -6 3 2.1
 5 -41 7 29 5.1
 -5 -41 7 34.8 5.5
 -5 -41 8 60.39 7.2
 -5 -41 9 309.17 15
 -5 -41 10 17.3 3.8
 -5 -43 0 631.54 23.2
 -5 -43 1 18.4 4.9
 -5 -43 -1 19.8 4.9
 -5 -43 -2 266.77 15
 -5 -43 2 287.47 16
 -5 -43 3 3.2 1.7
 -5 -43 -3 8.7 3.3
 -5 -43 -4 14.1 3.6
 -5 -43 4 7.7 2.6
 -5 -43 5 10.7 3.5
 -5 -43 -5 6 2.6
 5 -43 5 1.2 1.2
 5 -43 6 -1.3 2.1
 -5 -43 6 2 1.8
 -5 -43 7 62.49 6.9
 -5 -43 8 57.69 6.4
 -5 -43 9 390.76 15.9
 -5 -45 0 583.94 22.2
 -5 -45 1 15.4 3.9
 -5 -45 -1 23.6 4.9
 -5 -45 2 106.59 9
 -5 -45 -2 104.49 9
 -5 -45 3 -1.8 2.4
 -5 -45 -3 1.2 1.5
 -5 -45 -4 0.4 1.3
 -5 -45 4 8.6 3.1
 -5 -45 5 5.4 2.4
 -5 -45 6 0.4 1.5
 -5 -45 7 7.4 2.3
 -5 -47 0 251.27 13.6
 -5 -47 1 10 2.9
 -5 -47 -1 10.5 3.1
 -5 -47 2 23.6 4.3
 -5 -47 -2 17.3 3.6
 -5 -47 3 3.5 2.2
 -5 -47 4 29.7 4.5
 6 0 0 2091.49 18.1
 6 0 1 320.17 8
 6 0 -1 318.47 6.4
 6 0 -2 685.23 9
 6 0 2 702.43 13.1
 6 0 3 1647.54 22.2
 6 0 4 4254.87 38.9
 6 0 5 653.43 16.5
 6 0 6 753.82 19.2
 6 0 7 636.04 19.2
 6 0 8 3.5 2.7
 -6 0 8 1 1.2
 -6 0 9 137.09 8.6
 -6 0 10 6.1 1.7
 -6 0 11 36.1 4.6
 -6 0 12 -0.3 1.9
 -6 0 13 91.59 8.6
 -6 0 14 36.1 6.1
 -6 0 15 477.55 20.7
 -6 0 16 157.28 11.6
 -6 0 17 82.09 9.6
 -6 0 18 32.6 5
 -6 0 19 0.2 1.8
 6 2 0 3334.37 24.8
 6 -2 0 3342.47 21.3
 6 -2 1 11.3 1.6
 6 2 1 9.8 1.5
 6 2 -1 13.2 1.6
 6 -2 -1 9.9 1
 6 2 2 44.9 3.7
 6 -2 2 57.29 3.9
 6 2 -2 54.59 2.8
 6 -2 -2 48.7 2
 6 -2 3 36.7 3.4
 6 -2 -3 33.5 1.7
 6 2 3 34.8 3.4
 6 2 4 1313.97 21.5
 6 -2 4 1288.27 21.7
 6 2 5 469.35 14.5
 6 -2 5 493.95 14.9
 6 2 6 242.98 10.7
 6 -2 6 229.88 11.3
 6 2 7 546.85 17.2
 6 2 8 36.8 5
 -6 2 8 27 3.9
 -6 -2 8 27.9 3.8
 6 2 9 120.79 9.1
 -6 2 9 121.69 7.9
 -6 -2 9 101.39 7.9
 -6 -2 10 3 1.4
 -6 2 10 3 1.5
 -6 2 11 67.59 6.3
 -6 -2 11 74.19 6.8
 -6 2 12 -2.7 3.2
 -6 -2 12 -1.1 2.9
 -6 2 13 102.99 8.8
 -6 -2 13 98.89 8.9
 -6 2 14 55.39 6.8
 -6 -2 14 63.49 7.1
 -6 2 15 451.15 19.6
 -6 -2 15 443.96 20.3
 -6 2 16 216.88 13.7
 -6 -2 16 233.78 14
 -6 -2 17 141.29 11.4
 -6 2 17 140.19 11.7
 -6 2 18 0.1 2.4
 -6 -2 18 -4.1 2.8
 -6 -2 19 0.9 1.5
 6 4 0 2683.23 23.6
 6 -4 0 2859.41 19.9
 6 4 -1 28.6 2.3
 6 4 1 27.9 2.6
 6 -4 1 33.1 2.8
 6 4 -2 20.1 2
 6 -4 2 20.2 2.4
 6 4 2 16.2 2.1
 6 4 3 41.7 3.6
 6 -4 3 49.1 4
 6 4 4 6.8 1.7
 6 -4 4 5.6 1.6
 6 4 5 689.03 16.9
 6 4 6 595.14 17.4
 6 4 7 5.2 1.9
 -6 -4 8 110.59 7.5
 6 4 8 110.39 8.4
 -6 4 8 103.29 7.3
 -6 -4 9 837.12 21.5
 -6 4 9 866.91 21.6
 6 4 9 853.41 25.2
 6 4 10 68.39 7.8
 -6 -4 10 85.39 7.2
 -6 4 10 78.99 6.9
 -6 4 11 312.47 14.9
 -6 -4 11 364.96 15.8
 -6 4 12 -1.9 2.5
 -6 -4 12 -3.5 2.7
 -6 4 13 10.7 2.7
 -6 -4 13 9.5 2.7
 -6 4 14 5.5 2.5
 -6 -4 14 3.1 2.1
 -6 4 15 311.87 15.9
 -6 -4 15 294.57 16.2
 -6 4 16 197.88 12.9
 -6 -4 16 185.58 13.3
 -6 4 17 10.7 3.8
 -6 -4 17 15.4 3.9
 -6 -4 18 9.1 3
 -6 -4 19 31.2 4.7
 6 6 0 2252.77 22.6
 6 6 -1 92.59 4.4
 6 6 1 111.59 5.4
 6 6 -2 31.4 2.6
 6 6 2 31 3
 6 6 3 8.7 1.9
 6 6 4 21 2.8
 6 6 5 49.3 5
 6 6 6 126.79 8
 6 6 7 30.3 4.3
 -6 6 8 335.97 12.9
 6 6 8 359.36 15.1
 -6 6 9 1343.57 27
 -6 -6 9 1331.27 27.6
 6 6 9 1393.76 31.9
 -6 6 10 73.69 6.8
 6 6 10 73.79 8.2
 -6 -6 10 96.79 8
 -6 6 11 686.73 21
 -6 -6 11 687.43 21.7
 -6 -6 12 14 4
 -6 6 12 12.7 3.2
 -6 6 13 26.8 4.9
 -6 -6 13 33 5.3
 -6 6 14 23 4.5
 -6 -6 14 17.4 3.9
 -6 6 15 437.06 19.6
 -6 -6 15 468.95 20.2
 -6 6 16 32.1 5.6
 -6 -6 16 32.5 5.3
 -6 -6 17 4.5 2.2
 -6 -6 18 102.69 9
 -6 -6 19 104.39 8.6
 -6 -6 20 290.97 13.1
 6 8 0 2979.3 27.5
 6 8 1 298.57 9.3
 6 8 -1 257.97 7.9
 6 8 -2 457.65 10.2
 6 8 2 456.05 11.9
 6 8 3 12.7 2.3
 6 8 4 168.78 8.3
 6 8 5 9.4 2.4
 6 8 6 -1.8 2
 -6 8 7 41.7 4.4
 6 8 7 50.59 5.4
 6 8 8 85.39 6.5
 6 8 8 98.29 8.3
 -6 8 8 104.09 7.2
 -6 8 9 1898.71 32.2
 6 8 9 1888.31 37.3
 6 8 10 221.48 14.3
 -6 8 10 234.18 11.7
 -6 -8 10 249.28 12.7
 -6 8 11 1340.87 29.7
 -6 -8 11 1353.16 30.9
 6 8 11 1309.67 36.2
 -6 8 12 62.49 7.1
 -6 -8 12 64.89 7.4
 -6 8 13 76.59 8.5
 -6 -8 13 90.39 8.8
 -6 8 14 44.9 6.7
 -6 -8 14 41.2 6.3
 -6 8 15 53.99 6.9
 -6 -8 15 50.39 6.8
 -6 -8 16 26.8 4.9
 -6 -8 17 4.1 2.7
 -6 -8 18 121.29 9.7
 -6 -8 19 154.28 10.4
 6 10 0 3256.87 30.3
 6 10 1 406.46 11.3
 6 10 -1 331.77 9.6
 6 10 -2 946.81 15.7
 6 10 2 983.4 18.4
 6 10 3 33.4 3.4
 6 10 4 72.19 5.6
 6 10 5 270.57 11.5
 6 10 6 270.47 12
 6 10 7 3.4 1.2
 -6 10 7 6 1.9
 6 10 7 8 2.1
 6 10 8 112.59 9
 6 10 8 117.69 7.7
 -6 10 8 116.79 7.9
 6 10 9 924.71 22.5
 -6 10 9 877.21 22.5
 6 10 9 862.31 26.1
 6 10 10 338.97 14.2
 -6 10 10 392.36 15.7
 6 10 10 369.26 18.2
 -6 10 11 1461.65 31.4
 6 10 11 1436.16 38.7
 -6 -10 11 1489.75 32.7
 -6 10 12 42.2 5.9
 -6 -10 12 47.8 6.8
 -6 -10 13 -1.1 2.3
 -6 10 13 1.2 2.3
 -6 10 14 -0.6 1.8
 -6 -10 14 1.2 2.1
 -6 -10 15 21.4 4.6
 -6 -10 16 -3 3.7
 -6 -10 17 2.1 2.4
 -6 -10 18 80.19 8.3
 -6 -10 19 82.19 7.6
 6 12 0 3246.18 31.8
 6 12 -1 296.67 9.7
 6 12 1 341.37 10.8
 6 12 -2 503.15 12.1
 6 12 2 476.45 13.6
 6 12 3 18.9 2.5
 6 12 4 124.69 7.5
 6 12 5 928.41 21.9
 6 12 6 823.12 21.8
 6 12 6 824.62 19
 6 12 7 127.19 7.7
 6 -12 7 113.49 8.1
 6 12 7 109.49 8.4
 6 12 8 18.1 3.5
 6 12 8 21.5 3.5
 -6 12 8 18.8 3.4
 -6 -12 8 19.9 3.3
 6 12 9 776.72 21.4
 -6 12 9 729.93 21.1
 6 12 9 728.63 24.8
 6 12 10 262.17 12.7
 -6 12 10 255.87 13.1
 6 12 10 237.68 14.9
 -6 -12 11 620.24 22.1
 -6 12 11 633.14 20.9
 6 12 11 579.24 25.3
 6 12 11 601.24 19.8
 -6 -12 12 6.7 2.9
 6 12 12 7.3 4.2
 -6 -12 13 17.3 4.3
 -6 -12 14 20.7 3.9
 -6 -12 15 122.69 10.8
 -6 -12 16 53.09 7.2
 -6 -12 17 7.7 3.8
 -6 -12 18 24.3 4.6
 -6 -12 19 18.4 3.5
 -6 14 0 1283.17 13
 6 14 0 1526.65 23
 6 14 -1 149.79 7.3
 6 14 1 174.68 8.1
 6 14 2 14.6 2.7
 6 14 -2 10.7 2.1
 6 14 -3 212.48 8.5
 6 14 3 278.87 11.2
 6 14 4 1586.44 27.7
 6 14 5 1091.49 24
 6 -14 5 1033.2 22.9
 6 14 6 1050.59 21.9
 6 14 6 1035 25.1
 -6 -14 6 1038.5 23.3
 6 14 7 562.64 16.8
 6 -14 7 503.35 17.2
 6 14 7 525.55 19.1
 6 14 8 2.3 1.4
 6 14 8 -0.7 2.6
 6 -14 8 -0.9 1.8
 -6 -14 8 -0.2 1.8
 6 14 9 409.96 15.9
 6 14 9 378.36 18.4
 6 14 10 102.59 8.2
 6 14 10 96.19 9.8
 6 14 11 33.1 6.2
 6 14 11 29.9 4.7
 6 14 12 3.1 2.8
 -6 -14 12 6.4 3.7
 -6 -14 13 66.89 7.9
 -6 -14 14 91.49 9.1
 -6 -14 15 453.65 20.9
 -6 -14 16 122.09 10.3
 -6 -14 17 57.39 6.9
 -6 -14 18 -0.9 1.9
 -6 -14 19 1.7 1.7
 -6 16 0 611.44 10.4
 6 16 0 737.73 16.7
 6 16 -1 7 1.8
 6 16 1 10.4 2.5
 6 16 -2 187.28 8.1
 6 16 2 187.58 9.2
 6 16 -3 827.62 17.8
 6 16 3 1077.79 22.7
 6 16 4 1194.08 25
 6 16 5 1175.98 26.3
 -6 -16 5 1179.48 24.9
 6 -16 5 1134.09 24.7
 6 16 6 1101.89 27.1
 6 16 6 1110.99 23.1
 6 -16 6 1286.27 26.8
 -6 -16 6 1313.87 27.1
 -6 -16 7 355.56 14.8
 6 -16 7 373.36 15
 6 16 7 401.66 17.3
 6 16 8 38 4.8
 6 16 8 32.5 4.9
 6 -16 8 40.4 5.2
 -6 -16 8 40.6 5.1
 6 16 9 97.39 8
 6 16 9 89.89 9.3
 -6 -16 9 83.39 8.2
 6 16 10 20.6 3.8
 -6 -16 10 25.4 4.7
 6 16 10 17.3 4.2
 6 16 11 24.6 5.5
 6 16 11 26.7 4.6
 -6 -16 12 36.5 6.7
 6 16 12 26.1 6.6
 -6 -16 13 215.98 13.9
 -6 -16 14 299.37 16.8
 -6 -16 15 654.93 24.4
 -6 -16 16 289.47 16.4
 -6 -16 17 140.69 10.7
 -6 -16 18 2.7 1.6
 -6 -16 19 -2.7 2.1
 6 18 0 37.5 4.1
 6 18 -1 1 1.2
 6 18 1 3.5 1.1
 6 18 -2 341.17 12.1
 6 18 2 305.87 12.4
 6 18 -3 440.56 14
 6 18 3 504.45 16.7
 -6 -18 4 1094.59 23.8
 6 18 4 1109.99 25.7
 6 18 5 1109.49 26.9
 6 18 5 1145.69 23.2
 6 18 6 1077.49 28.2
 6 -18 6 1313.47 28
 -6 -18 6 1386.46 29
 -6 -18 7 496.65 18
 6 18 7 543.95 20.7
 6 -18 7 492.95 17.6
 6 18 8 15.7 3.3
 6 -18 8 13.2 3
 -6 -18 8 13.2 2.6
 6 18 8 11.4 3.1
 6 18 9 44.4 5.7
 6 -18 9 40.7 5.4
 -6 -18 9 47.6 6.5
 6 18 9 41.9 6.6
 -6 -18 10 59.19 7.3
 6 18 10 38.1 6.7
 6 18 10 47.5 5.8
 6 18 11 4.1 2.6
 -6 -18 11 1.7 1.6
 6 18 11 1.4 1.9
 6 18 12 25 6.3
 -6 -18 13 250.47 15.2
 -6 -18 14 284.77 16.2
 -6 -18 15 787.42 26.8
 -6 -18 16 387.26 19
 -6 -18 17 163.98 11.4
 -6 -18 18 10.4 2.9
 6 20 0 375.56 13.7
 6 20 -1 7.3 1.9
 6 20 1 10 2.4
 6 20 2 -0.3 1.5
 6 20 -2 0.9 1
 -6 -20 -3 233.38 10.3
 -6 -20 3 244.58 11.2
 6 20 -3 242.38 10.8
 6 -20 3 242.88 11.7
 6 20 4 819.82 19.8
 6 20 -4 998.4 22.2
 -6 -20 -4 705.13 18.8
 -6 -20 4 786.92 20.9
 6 -20 4 899.81 22.6
 6 20 4 811.52 23.1
 6 20 5 900.71 25.4
 6 20 5 875.51 20.9
 6 -20 5 805.32 22.1
 -6 -20 5 767.52 21.1
 6 20 6 472.75 15.8
 6 20 6 476.35 19.4
 6 -20 6 575.24 19.2
 -6 -20 6 607.74 19.7
 6 20 7 449.46 16.3
 6 20 7 428.06 19.4
 6 -20 7 385.76 16.1
 -6 -20 7 386.26 16.3
 6 20 8 25.6 4.4
 6 -20 8 24.9 4
 6 20 8 22.6 4.8
 -6 -20 8 26.7 4.4
 6 20 9 165.58 10.7
 6 -20 9 141.79 10.3
 -6 -20 9 146.19 11.1
 6 20 9 150.38 13
 6 20 10 79.09 9.8
 -6 -20 10 109.29 10
 6 20 10 90.99 8.1
 -6 -20 11 41.1 6.1
 6 20 11 40.5 7.6
 6 20 11 46.8 6.1
 -6 -20 12 2.9 1.6
 -6 -20 13 25.5 5.2
 -6 -20 14 290.97 16.3
 -6 -20 15 377.56 18.4
 -6 -20 16 284.47 15.8
 -6 -20 17 100.99 8.8
 -6 -20 18 -1.1 1.9
 6 22 0 968.9 23.1
 6 22 -1 605.44 18.1
 6 22 1 625.74 19.2
 6 22 2 41.5 4.9
 6 -22 2 43.2 5.2
 6 22 -2 43.2 4.9
 6 22 -3 92.39 7.1
 6 22 3 103.69 7.2
 6 -22 3 89.29 7.5
 6 22 3 107.19 8.3
 6 22 -4 439.86 15.8
 6 22 4 372.86 13.8
 6 -22 4 418.26 16.1
 6 22 4 366.26 16.4
 6 22 5 788.42 24.8
 6 22 -5 662.23 19.7
 6 22 5 777.72 20.2
 -6 -22 -5 626.04 18.7
 -6 -22 5 683.23 20.6
 6 -22 5 720.43 21.7
 6 22 6 255.27 12.1
 6 22 6 250.07 14.9
 -6 -22 -6 249.78 12.1
 6 -22 6 313.37 14.5
 -6 -22 6 335.67 15.3
 6 22 7 40.4 5.2
 6 22 7 34.2 5.8
 -6 -22 7 32.4 5
 6 -22 7 34.2 5.1
 6 22 8 22.7 4.2
 6 -22 8 24.9 4.4
 6 22 8 19.1 4.3
 -6 -22 8 26.8 4.5
 6 22 9 176.08 11
 6 -22 9 164.38 11.4
 -6 -22 9 165.28 12
 6 22 9 168.48 14.3
 -6 -22 10 368.26 18.2
 6 22 10 331.67 15.4
 -6 -22 11 144.89 11.6
 6 22 11 151.78 14.9
 -6 -22 12 111.09 10.4
 -6 -22 13 9.4 3.9
 -6 -22 14 51.19 6.7
 -6 -22 15 159.18 11.8
 -6 -22 16 135.59 10.6
 -6 -22 17 12.7 3
 6 24 0 1816.22 33.7
 6 24 1 1157.48 24.5
 6 24 1 1163.18 28.1
 6 24 2 205.38 10.4
 6 24 -2 238.38 12
 6 -24 2 210.68 11.7
 6 24 2 212.28 12.3
 6 24 3 10.8 2.4
 6 24 -3 10.5 2.3
 6 -24 3 10 2.8
 6 24 3 11.3 2.3
 6 24 4 102.29 7.7
 6 -24 4 123.39 9
 6 24 4 103.89 9.1
 6 24 -4 131.49 8.9
 6 24 5 256.27 14.9
 6 24 5 261.57 12.3
 6 24 -5 215.08 12.3
 6 -24 5 225.48 12.5
 -6 -24 5 235.28 12.7
 6 24 6 149.79 9.7
 6 -24 6 176.08 11.5
 6 24 -6 185.68 11.5
 6 24 6 139.99 11.6
 -6 -24 6 180.68 11.8
 6 24 7 46.2 5.6
 6 24 -7 38.7 5.7
 6 24 7 35.7 6.2
 6 -24 7 32.7 5
 -6 -24 7 31.1 5.1
 6 24 8 168.58 10.9
 6 -24 8 188.28 12.1
 6 24 8 157.88 13.8
 -6 -24 8 195.98 12.8
 6 -24 9 247.08 14.3
 -6 -24 9 232.88 14.7
 6 24 9 269.47 18.7
 6 24 9 273.67 14
 -6 -24 10 528.75 22.1
 6 24 10 520.35 19.8
 -6 -24 11 393.36 19.3
 -6 -24 12 81.59 8.8
 -6 -24 13 55.59 7.6
 -6 -24 13 38.6 6
 -6 -24 14 -0.4 2.4
 -6 -24 15 17.9 3.8
 -6 -24 16 39.9 5.6
 -6 -24 17 -1.9 2
 6 26 0 1098.39 24.6
 6 26 0 1111.59 28.3
 6 26 -1 1366.26 27.3
 6 26 1 1407.16 27.8
 6 26 1 1426.16 32.9
 6 26 -2 270.87 13.7
 6 26 2 214.58 11
 6 26 -2 238.98 11.3
 6 -26 2 236.68 12.8
 6 26 2 233.28 13.6
 6 26 3 20.1 3.5
 6 26 3 12.7 3.1
 6 26 -3 17.9 3.3
 6 -26 3 22.6 4.2
 6 26 4 9.1 2.7
 6 26 -4 13.5 3.3
 6 -26 4 15.7 3.5
 6 26 4 11.5 2.9
 6 26 5 97.59 7.9
 6 26 5 93.39 9.5
 6 26 -5 81.69 7.8
 6 -26 5 91.99 8.2
 -6 -26 5 83.79 8.2
 6 26 6 113.39 8.7
 6 -26 6 137.59 10.5
 6 26 -6 140.29 10.6
 -6 -26 6 140.29 10.5
 6 26 7 2 1.7
 6 26 7 2.3 2
 6 26 -7 5.6 3
 6 -26 7 -0.8 2.6
 -6 -26 7 -0.5 2
 6 26 8 178.38 11.1
 6 26 -8 205.98 13.8
 6 -26 8 195.78 12.8
 6 26 8 160.98 14.6
 -6 -26 8 188.28 12.7
 6 26 -9 806.52 27.9
 6 -26 9 764.42 25.8
 -6 -26 9 761.12 26.6
 6 26 9 840.32 34.3
 6 26 9 867.31 25.2
 -6 -26 10 706.93 26.1
 6 26 10 670.13 22.3
 -6 -26 11 88.09 9.2
 -6 -26 12 400.46 19.4
 -6 -26 13 14.8 4
 -6 -26 14 -1.4 2.1
 -6 -26 15 6.9 2.6
 -6 -26 16 4.4 1.7
 6 28 0 521.45 17.6
 6 28 0 576.54 21.8
 6 28 -1 774.72 24.8
 6 28 -1 784.82 21.5
 6 28 1 787.62 21.7
 6 28 1 796.72 26.3
 6 28 2 88.29 9
 6 28 2 84.29 7.2
 6 28 -2 98.49 7.6
 6 28 -2 110.99 9.3
 6 -28 2 98.39 8.6
 6 28 3 0.7 2.2
 6 28 3 1.7 1.4
 6 28 -3 1.2 1.9
 6 -28 3 1.4 1.5
 6 28 4 8 2.9
 -6 -28 4 5.8 2.3
 6 28 4 5.9 2
 6 28 -4 2.4 1.5
 6 -28 4 5.9 2.4
 6 28 5 93.89 8
 6 28 -5 75.09 8.1
 6 28 5 86.69 9.7
 -6 -28 5 80.09 8
 6 -28 5 88.09 8.4
 6 28 6 46.8 5.9
 6 28 -6 54.69 7.1
 6 28 6 49.9 7.9
 6 -28 6 58.19 7
 -6 -28 6 50.99 6.6
 6 28 -7 1.1 1.7
 6 28 7 2.7 1.9
 6 28 7 1.6 2.7
 6 -28 7 -1.5 3
 -6 -28 7 1.4 2.1
 6 28 -8 318.37 18
 6 -28 8 307.57 16.2
 -6 -28 8 297.37 16.3
 6 28 8 243.98 18.4
 6 28 8 266.47 13.8
 -6 -28 9 389.76 19.4
 6 -28 9 420.56 19.4
 -6 -28 10 503.85 22.3
 -6 -28 11 151.78 12
 -6 -28 12 137.49 11.5
 -6 -28 13 2.4 1.9
 -6 -28 14 18.3 4.2
 -6 -28 15 33.8 5.3
 -6 -28 16 19.3 3.7
 6 30 0 159.28 10
 6 30 0 181.78 13.1
 6 30 1 339.37 14.9
 6 30 -1 330.07 14.3
 6 30 -1 327.67 17.1
 6 30 1 320.97 17.9
 6 30 2 0.3 1.5
 6 30 2 -2.9 2.7
 6 -30 2 -1.4 1.8
 6 30 -2 -2.7 2.4
 6 30 3 11.5 3.5
 6 30 3 11.4 2.9
 6 30 -3 7 2.4
 6 -30 3 14.6 3.5
 6 30 4 41.8 6.7
 6 30 4 47.9 6.1
 6 30 -4 48.3 6.6
 6 -30 4 54.69 6.6
 -6 -30 4 53.79 7
 6 30 5 152.48 10.4
 6 30 5 148.49 13.4
 6 30 -5 117.79 10.8
 6 -30 5 145.39 11.1
 -6 -30 5 138.09 11.1
 6 30 6 116.69 9.3
 6 30 -6 139.39 11.9
 6 30 6 120.29 12.6
 6 -30 6 138.09 11
 -6 -30 6 144.39 11.2
 6 30 7 1.2 1.6
 6 30 7 0.9 1.9
 6 -30 7 -0.1 2.7
 -6 -30 7 1.6 2.2
 6 -30 8 36.3 5.6
 -6 -30 8 31.6 5.5
 6 30 8 34.8 5.4
 6 -30 9 55.09 7.2
 -6 -30 9 60.09 7.9
 6 30 9 68.19 7.3
 -6 -30 10 597.54 24.2
 -6 -30 11 78.39 8.7
 -6 -30 12 20.8 4.4
 -6 -30 13 13 4
 -6 -30 13 7.4 2.7
 -6 -30 14 61.39 7.2
 -6 -30 15 85.79 7.8
 6 32 0 52.09 6.1
 6 32 0 52.49 7.6
 6 32 1 10.4 3.8
 6 32 -1 16 3.4
 6 32 1 9.9 2.9
 6 32 -1 14.7 4
 6 32 2 24.2 5.3
 6 32 2 21.8 4.1
 6 32 -2 14.7 3.9
 6 32 3 72.09 7.3
 6 32 -3 56.39 7.8
 6 -32 3 55.49 6.7
 -6 -32 3 50.59 6.3
 6 32 3 57.89 8.6
 6 32 4 118.49 9.4
 6 32 4 106.19 11.8
 6 32 -4 145.39 12
 6 -32 4 136.09 10.7
 -6 -32 4 135.29 10.6
 6 32 5 450.05 17.9
 6 32 5 436.56 24.1
 6 32 -5 388.26 20.2
 6 -32 5 443.46 19.7
 -6 -32 5 414.16 18.7
 6 -32 6 280.67 15.9
 -6 -32 6 275.17 15.9
 -6 -32 7 80.99 8.6
 6 -32 7 88.39 8.9
 6 32 7 87.89 8.3
 6 32 8 65.89 7
 6 -32 8 72.09 8.5
 -6 -32 8 71.89 8.3
 -6 -32 9 49.9 7
 6 -32 9 49.3 6.9
 -6 -32 10 183.68 13.8
 -6 -32 11 11.1 3.4
 -6 -32 12 4.1 1.8
 -6 -32 13 20 4.5
 -6 -32 13 7.2 2.4
 -6 -32 14 185.58 11.5
 -6 -32 15 100.19 7.9
 6 34 0 6 2
 6 34 0 11.7 3.8
 6 34 1 75.99 7.2
 6 34 -1 65.89 8.9
 6 34 1 79.89 10
 6 34 2 9 3.5
 6 34 2 9.3 2.6
 6 34 -2 7.5 3.7
 -6 -34 2 8.5 3
 6 34 3 199.28 11.9
 6 -34 3 188.38 12.3
 -6 -34 3 188.18 12.6
 6 -34 4 252.47 14.8
 -6 -34 4 243.78 14.8
 6 -34 5 462.85 20.1
 -6 -34 5 448.86 19.9
 6 34 5 467.15 18.6
 6 -34 6 565.34 22.8
 -6 -34 6 605.84 24
 6 -34 7 321.77 17.3
 -6 -34 7 310.57 17
 6 34 7 347.87 16
 -6 -34 8 11.7 3.8
 6 -34 8 7.8 3
 -6 -34 9 3.8 2.3
 -6 -34 10 55.59 7.2
 -6 -34 11 0.2 1.9
 -6 -34 12 6.6 2.2
 -6 -34 13 13.4 3.4
 -6 -34 13 2.4 1.6
 -6 -34 14 182.68 10.8
 -6 -36 1 43.4 6.4
 6 36 1 40.7 5.1
 6 36 2 16.3 3.5
 -6 -36 2 9.9 3.4
 6 -36 3 199.08 12.7
 -6 -36 3 205.68 13.7
 6 36 3 207.48 12.1
 6 -36 4 187.88 12.9
 -6 -36 4 199.08 13.4
 6 36 4 160.28 11.2
 6 -36 5 609.24 23.1
 -6 -36 5 607.04 23.9
 6 36 5 581.94 20.6
 -6 -36 6 594.44 23.4
 6 36 6 539.75 19.9
 6 -36 6 617.74 23.5
 6 -36 7 91.19 9.5
 -6 -36 7 94.09 9.7
 6 -36 8 42.1 6.3
 -6 -36 8 42.4 6.5
 -6 -36 9 4.8 2.6
 -6 -36 10 56.19 6.9
 -6 -36 11 -1.3 1.9
 -6 -36 12 -1.6 2.3
 -6 -36 13 3.8 2.2
 -6 -38 0 46.2 7.3
 -6 -38 1 360.96 18.3
 6 38 1 323.57 14.7
 6 38 2 10.1 2.6
 -6 -38 2 9.5 3.8
 -6 -38 3 75.79 8.2
 6 38 3 78.49 7.4
 6 -38 4 94.19 8.9
 -6 -38 4 103.49 9.9
 6 38 4 90.59 8.2
 6 -38 5 329.17 16.6
 -6 -38 5 355.46 18
 6 -38 6 119.99 10.3
 -6 -38 6 127.59 10.8
 6 -38 7 32.3 5.6
 -6 -38 7 30.4 5.6
 -6 -38 8 5.9 2.8
 -6 -38 9 13.4 3.7
 -6 -38 10 152.08 10.7
 -6 -38 11 1.6 1.8
 -6 -40 0 32.6 6.4
 -6 -40 1 464.05 20.6
 -6 -40 -1 440.26 20.1
 -6 -40 -2 6 2.8
 -6 -40 2 6 3.3
 -6 -40 3 51.39 7
 -6 -40 4 40.5 6.1
 6 -40 5 41.6 6
 -6 -40 5 45.3 6.2
 6 -40 6 30.3 5.3
 -6 -40 6 28.3 5.2
 -6 -40 7 4.4 2.5
 -6 -40 8 117.39 9.9
 -6 -40 9 45.8 6.3
 -6 -40 10 299.67 14.5
 -6 -42 0 21.3 5.1
 -6 -42 1 579.84 22.5
 -6 -42 -1 577.84 22.8
 -6 -42 2 53.49 7.4
 -6 -42 -2 55.39 7.2
 -6 -42 3 37.9 5.7
 -6 -42 -3 31 5.3
 -6 -42 4 6.6 2.3
 -6 -42 -4 6.1 2.6
 -6 -42 5 19.1 4.1
 -6 -42 -5 18.7 4.1
 -6 -42 6 0.2 1.4
 -6 -42 -6 2.1 2.2
 -6 -42 7 15.7 3.7
 -6 -42 8 231.28 13
 -6 -42 9 65.29 6.7
 -6 -44 0 27.5 5.4
 -6 -44 1 470.35 20.3
 -6 -44 -1 447.06 19.2
 -6 -44 2 4.6 2.5
 -6 -44 -2 4.3 2.7
 -6 -44 3 13.4 3.2
 -6 -44 -3 9.1 2.9
 -6 -44 4 -1.1 2
 -6 -44 -4 -1.4 1.8
 -6 -44 5 15 3.7
 -6 -44 -5 10.2 3.1
 -6 -44 6 5.2 2
 -6 -44 7 16 3.4
 -6 -46 0 16.6 4.3
 -6 -46 -1 349.77 16.6
 -6 -46 1 343.37 16
 -6 -46 2 11.4 3.3
 -6 -46 -2 17.4 3.8
 -6 -46 3 3.7 2.2
 -6 -46 -3 -1.5 1.8
 -6 -46 4 9.6 3.1
 -6 -46 5 30.7 4.8
 7 1 0 0.9 0.6
 7 -1 0 1.9 0.8
 7 1 1 687.83 12.5
 7 -1 -1 695.63 9.9
 7 1 -2 69.79 3.3
 7 1 2 73.59 4.6
 7 -1 -2 75.29 3
 7 -1 2 81.99 4.7
 7 -1 3 377.66 11.6
 7 -1 -3 369.56 6.7
 7 1 -3 376.26 7.7
 7 1 3 402.56 11.4
 7 -1 4 288.97 10.5
 7 1 4 301.17 10.9
 7 1 5 1027 21.4
 7 -1 5 989.5 21.1
 7 -1 6 1260.47 26
 7 1 6 1213.38 24.7
 7 1 7 595.64 18.8
 7 -1 7 609.74 19.4
 -7 1 8 136.29 8.6
 7 1 8 141.69 10.1
 -7 -1 8 133.49 8.6
 -7 1 9 15.2 3.1
 -7 -1 9 13.9 2.8
 -7 1 10 171.68 10.5
 -7 -1 10 186.28 10.7
 -7 1 11 2.7 1.6
 -7 -1 11 0.5 2.1
 -7 1 12 -2.2 2.9
 -7 -1 12 -6.7 3.6
 -7 1 13 0.6 1.4
 -7 -1 13 1.3 2.1
 -7 1 14 320.97 16.1
 -7 -1 14 330.57 16.2
 -7 1 15 102.99 9.8
 -7 -1 15 108.89 10.3
 -7 1 16 357.86 18.1
 -7 -1 16 333.37 17.6
 -7 1 17 90.99 8.9
 -7 -1 17 85.69 9
 -7 1 18 0.1 1.8
 -7 -1 18 -0.3 2.1
 -7 -1 19 -6.7 2.5
 7 3 0 102.79 4.9
 7 -3 0 101.09 4.2
 7 -3 1 217.08 7.1
 7 3 -1 225.68 6.7
 7 3 1 209.78 7.4
 7 3 -2 114.79 4.7
 7 3 2 118.89 5.9
 7 -3 2 118.59 5.7
 7 3 -3 100.19 4.3
 7 3 3 90.19 5.6
 7 -3 3 98.69 5.8
 7 -3 4 183.18 9
 7 3 4 201.58 8.9
 7 -3 5 789.32 19.9
 7 3 5 801.32 19
 7 3 6 450.25 15.1
 7 3 7 58.69 6
 -7 -3 8 20.7 3.4
 7 3 8 18.2 3.8
 -7 3 8 15.3 2.9
 -7 -3 9 18.9 3.4
 7 3 9 12 3.6
 -7 3 9 15.7 3
 -7 3 10 361.56 15.2
 -7 -3 10 380.26 15.5
 -7 3 11 0.2 1.6
 -7 -3 11 0.1 1.6
 -7 3 12 1.9 1.2
 -7 -3 12 1.1 1.5
 -7 3 13 14.7 3.6
 -7 -3 13 12.4 3.2
 -7 3 14 208.38 13.5
 -7 -3 14 231.48 13.8
 -7 3 15 111.59 10.5
 -7 -3 15 118.69 10.7
 -7 3 16 271.07 15.9
 -7 -3 16 302.27 16
 -7 3 17 20.6 4.3
 -7 -3 17 19.7 4.7
 -7 -3 18 3.2 2
 -7 -3 19 31.5 4.6
 7 5 0 195.88 7
 7 5 -1 720.23 12.7
 7 5 1 729.83 14.2
 7 5 2 43.4 3.7
 7 5 -2 46.4 3.2
 7 5 -3 8.6 1.6
 7 5 3 6.6 1.8
 7 5 4 14.9 2.5
 7 5 5 62.39 5.6
 7 5 6 382.96 14.2
 7 5 7 30.9 4.5
 -7 5 8 172.18 9.7
 7 5 8 182.08 11.1
 -7 -5 8 168.48 9.7
 -7 5 9 192.78 10.5
 -7 -5 9 214.88 11.3
 7 5 9 200.28 12.6
 -7 5 10 910.21 23.8
 -7 -5 10 949.8 24.6
 7 5 10 877.11 28.6
 -7 -5 11 12.4 3.1
 -7 5 11 6.9 2.3
 -7 5 12 166.58 11.1
 -7 -5 12 168.78 11.5
 -7 5 13 5.1 2.4
 -7 -5 13 4.4 1.6
 -7 5 14 137.99 10.4
 -7 -5 14 138.89 11
 -7 5 15 76.19 8.3
 -7 -5 15 76.69 8.9
 -7 -5 16 123.19 10.2
 -7 5 16 91.99 9.8
 -7 -5 17 -3 2.7
 -7 -5 18 22.4 4.4
 -7 -5 19 142.89 9.8
 7 7 0 385.86 10.2
 7 7 -1 1448.85 19
 7 7 1 1423.86 21.3
 7 7 2 -3.5 2.1
 7 7 -2 1 0.6
 7 7 -3 1.8 0.9
 7 7 3 -0.9 1
 7 7 4 41.9 4.3
 7 7 5 7.7 2
 7 7 6 2.5 1.6
 -7 7 7 6.6 1.9
 7 7 7 12.1 2.6
 -7 7 8 978 22.6
 7 7 8 979 26.1
 -7 7 9 297.37 13
 7 7 9 285.97 15
 -7 -7 9 319.77 13.9
 -7 7 10 1143.19 26.2
 7 7 10 1127.29 32.4
 -7 -7 10 1164.08 27.3
 7 7 11 50.09 7.3
 -7 7 11 49.7 6.1
 -7 -7 11 55.59 6.5
 -7 -7 12 302.47 15.2
 -7 7 12 271.97 14.3
 -7 7 13 1 1.7
 -7 -7 13 -0.5 2.1
 -7 7 14 157.88 11.6
 -7 -7 14 149.19 11.5
 -7 7 15 14.3 3.8
 -7 -7 15 18.4 3.9
 -7 -7 16 1.2 2.2
 -7 -7 17 4.6 2.5
 -7 -7 18 89.59 8.3
 -7 -7 19 208.78 11.7
 7 9 0 450.45 11.6
 7 9 -1 2932.81 28.7
 7 9 1 2907.81 31.3
 7 9 -2 50.49 3.7
 7 9 2 62.89 4.6
 7 9 -3 10.5 1.7
 7 9 3 14.4 2.4
 7 9 4 11 2.4
 7 9 5 143.99 8.5
 7 9 6 180.38 10
 7 9 7 80.89 6.3
 -7 9 7 89.09 6.7
 7 9 7 94.79 7.8
 7 9 8 543.35 19.8
 -7 9 8 559.74 17.5
 7 9 8 516.15 16.3
 7 9 9 296.07 13
 -7 9 9 329.57 14
 7 9 9 313.17 16
 7 9 10 1558.94 37.8
 7 9 10 1503.15 29.9
 -7 9 10 1594.14 31.8
 -7 -9 10 1577.84 32.3
 -7 9 11 77.49 7.8
 7 9 11 72.39 9.2
 -7 -9 11 78.69 7.8
 -7 9 12 412.06 17.5
 -7 -9 12 397.56 17.9
 -7 -9 13 14.2 3.6
 -7 9 13 9.6 3.6
 -7 9 14 11.9 4.2
 -7 -9 14 14.9 3.6
 -7 -9 15 15.6 3.4
 -7 -9 16 33.1 5.2
 -7 -9 17 18.1 4.1
 -7 -9 18 67.09 7.2
 -7 -9 19 240.08 12.9
 7 11 0 528.55 13.5
 7 11 -1 3306.67 32.1
 7 11 1 3388.56 35
 7 11 -2 89.09 5.3
 7 11 2 113.19 6.7
 7 11 -3 8.7 1.7
 7 11 3 5 1.1
 7 11 4 106.79 7.1
 7 11 5 1199.48 25.3
 -7 -11 5 1292.77 25.3
 7 11 6 446.26 16.2
 7 11 7 13.2 2.8
 -7 11 7 13.7 2.7
 7 11 7 12.8 2.2
 7 11 8 272.17 14.2
 7 11 8 289.27 12.4
 -7 11 8 265.37 12.3
 7 11 9 222.38 11.7
 -7 11 9 234.88 12
 7 11 9 208.28 13.3
 7 11 10 1206.58 27.6
 -7 11 10 1159.48 28.1
 -7 11 11 118.39 9.3
 7 11 11 104.09 11
 -7 -11 11 121.19 9.7
 7 11 11 94.39 8.1
 7 11 12 63.09 9.3
 -7 11 12 69.19 7.4
 -7 -11 12 66.79 7.4
 -7 -11 13 15.3 4
 -7 -11 14 6.1 2.6
 -7 -11 15 1.4 2.4
 -7 -11 16 24 4.3
 -7 -11 17 4.5 3.1
 -7 -11 18 41.7 5.8
 -7 -11 19 77.59 7.3
 7 13 0 671.63 15.7
 7 13 -1 1517.45 22.9
 7 13 1 1525.95 24.7
 7 13 -2 69.09 4.9
 7 13 2 84.59 6
 7 13 -3 263.07 9.5
 7 13 3 240.48 11
 7 13 4 1233.38 24.9
 7 13 5 845.02 22.1
 7 -13 5 881.01 22.1
 7 13 6 621.84 19.8
 7 -13 6 597.24 18.7
 7 13 6 660.93 17.8
 7 13 7 147.79 9
 7 13 7 153.98 10.3
 -7 -13 7 161.08 9.7
 7 13 8 49.6 5.3
 7 13 8 36 5
 7 13 9 111.29 8.5
 7 13 9 87.99 8.8
 7 13 10 428.16 16.7
 7 13 10 368.26 19
 7 13 11 25.2 4.3
 7 13 11 28.2 5.9
 -7 -13 11 25.2 5.1
 7 13 12 58.79 8.8
 -7 -13 12 73.59 8.1
 -7 -13 13 5 2.3
 -7 -13 14 93.29 9.3
 -7 -13 15 88.59 8.9
 -7 -13 16 91.49 8.7
 -7 -13 17 2.4 2.3
 -7 -13 18 0.8 1.4
 -7 -13 19 35.2 4.6
 7 15 0 208.18 9.3
 7 15 -1 948.21 19.2
 7 15 1 978.6 20.7
 7 15 -2 69.19 5.4
 7 15 2 93.39 6.6
 7 15 -3 1681.23 25.4
 7 15 3 1583.24 28.3
 7 15 -4 410.86 12.8
 7 -15 4 408.16 14.7
 -7 -15 5 1297.27 26.8
 7 -15 5 1249.38 26.4
 7 15 6 907.41 21.5
 7 15 6 896.11 24.4
 7 15 7 306.27 12.9
 7 15 7 299.17 14.9
 -7 -15 7 322.47 14.1
 7 15 8 3.4 1.5
 7 15 8 4.9 1.8
 -7 -15 8 3.8 1.5
 7 15 9 38.3 5.2
 -7 -15 9 43.2 6
 7 15 9 30.3 5.3
 7 15 10 106.89 8.7
 7 15 10 94.49 10.2
 7 15 11 12 4
 7 15 11 14.4 3.4
 -7 -15 12 10.5 3.5
 7 15 12 9.7 4.1
 -7 -15 13 48.5 6.8
 -7 -15 14 436.26 19.9
 -7 -15 15 254.97 15.1
 -7 -15 16 255.77 15
 -7 -15 17 38.2 5.7
 -7 -15 18 -0.7 1.9
 7 17 0 146.39 8.2
 7 17 -1 -0.1 1.8
 7 17 1 -0.4 1.5
 7 17 -2 360.46 12.6
 7 17 2 428.76 14.8
 7 17 -3 673.83 17
 -7 -17 3 564.84 16.7
 -7 -17 -3 572.54 16.5
 7 17 3 662.33 19.1
 7 17 -4 660.33 17.2
 7 -17 4 665.23 19.4
 -7 -17 -4 722.93 19.2
 -7 -17 4 745.33 20
 7 17 5 873.81 20.6
 -7 -17 5 1038.7 24.7
 7 17 5 891.71 23.8
 7 -17 5 1016.8 24.3
 7 17 6 1005.5 26.8
 7 17 6 1019.2 23
 7 17 7 325.27 13.4
 7 -17 7 377.26 15.9
 7 17 7 326.47 16
 -7 -17 7 396.06 16.2
 7 17 8 2.7 1.8
 7 17 8 4.6 2.1
 -7 -17 8 4.8 1.7
 7 17 9 8.7 2.9
 7 17 9 4.4 1.6
 -7 -17 9 10.9 3.5
 7 17 10 72.59 7.3
 7 17 10 60.39 8.8
 -7 -17 10 74.89 8
 7 17 11 2.3 1.9
 7 17 11 -0.5 1.9
 7 17 12 40.5 7.6
 -7 -17 12 58.99 7.6
 -7 -17 13 208.28 13.7
 -7 -17 14 488.95 21.3
 -7 -17 15 406.96 19.3
 -7 -17 16 432.56 19.4
 -7 -17 17 84.49 8.2
 -7 -17 18 5.9 1.9
 -7 -19 0 10.3 2.2
 7 19 0 11.7 2.7
 -7 -19 1 0.7 1.2
 -7 -19 -1 0.3 1
 7 19 -1 -0.4 1.7
 7 19 1 1.9 1
 7 19 2 23.6 3.7
 -7 -19 2 18.4 3
 -7 -19 -2 16.9 2.8
 7 19 -2 17.7 2.6
 -7 -19 3 287.67 12.4
 -7 -19 -3 270.07 11.5
 7 -19 3 287.27 12.9
 7 19 3 320.07 13.8
 -7 -19 -4 663.73 18.8
 -7 -19 4 659.33 19.4
 7 19 -4 594.64 17.5
 7 -19 4 612.74 19.2
 7 19 4 710.23 21.4
 -7 -19 5 963.8 24.3
 7 19 5 826.42 23.9
 7 19 5 829.82 20.5
 7 19 -5 1039.9 23.5
 -7 -19 -5 837.82 21.7
 7 -19 5 984.2 24.6
 7 19 6 865.41 21.6
 7 19 6 831.72 25.7
 7 -19 6 738.63 21.6
 -7 -19 6 732.13 22
 7 19 7 342.27 14.1
 7 -19 7 395.36 16.5
 7 19 7 324.27 16.6
 -7 -19 7 406.36 16.8
 7 19 8 3.8 1.6
 7 -19 8 -0.7 2.4
 -7 -19 8 1.4 1.7
 7 19 8 0.2 2.3
 7 19 9 30.2 4.9
 7 19 9 18.3 4.7
 -7 -19 9 28.5 5
 7 19 10 109.49 8.8
 7 19 10 88.69 10.8
 -7 -19 10 97.49 9.4
 7 19 11 4.4 2.5
 7 19 11 2.1 2.6
 -7 -19 13 94.89 9.4
 -7 -19 14 440.06 20
 -7 -19 15 419.36 19.6
 -7 -19 16 338.47 17
 -7 -19 17 80.09 7.9
 -7 -19 18 1.5 1.2
 7 21 0 73.79 6.7
 -7 -21 0 54.99 5.1
 -7 -21 -1 147.29 8.3
 7 21 -1 244.98 11.4
 -7 -21 1 158.38 8.7
 7 21 1 237.38 11.9
 7 21 2 23.9 3.7
 -7 -21 -2 20.4 3.2
 -7 -21 2 21.3 3.3
 7 21 -2 24 3.6
 7 -21 2 21.2 3.4
 -7 -21 3 109.19 7.9
 -7 -21 -3 98.69 7.1
 7 -21 3 118.39 8.6
 7 21 3 123.29 8.9
 -7 -21 4 431.56 16.4
 7 21 4 485.95 16
 7 21 -4 388.26 14.8
 -7 -21 -4 426.36 15.2
 7 -21 4 435.06 16.6
 7 21 4 472.95 18.2
 7 21 5 571.34 21.1
 7 21 -5 739.53 21
 -7 -21 -5 592.74 18.5
 7 21 5 572.84 17.7
 7 -21 5 684.73 21.2
 7 21 6 438.26 19.4
 7 21 6 435.46 15.7
 7 21 -6 379.86 15.5
 -7 -21 -6 414.56 16
 7 -21 6 393.16 16.4
 -7 -21 6 381.26 16.3
 7 21 7 195.48 11.3
 7 -21 7 234.98 13.2
 7 21 7 195.98 13.5
 -7 -21 7 244.58 13.5
 7 21 8 23.7 4.3
 7 -21 8 18.1 3.7
 7 21 8 21.1 5
 -7 -21 8 18 3.8
 7 21 9 115.79 9.4
 7 21 9 101.99 11
 7 21 10 225.68 17.3
 -7 -21 10 206.08 13.6
 7 21 10 224.18 13
 -7 -21 11 57.59 7.2
 7 21 11 47.4 8.3
 7 21 11 58.39 6.7
 -7 -21 13 19.9 4.3
 -7 -21 14 110.69 10
 -7 -21 15 248.68 14.7
 -7 -21 16 135.69 10.6
 -7 -21 -17 22.3 3.9
 -7 -21 17 22.5 4
 7 23 0 1812.22 33.5
 7 23 -1 586.34 18.9
 7 23 1 536.25 18.8
 7 23 -2 88.49 7.2
 7 23 2 94.59 8
 -7 -23 3 -1 1.7
 7 23 3 -0.1 1.1
 -7 -23 -3 0.6 1
 7 23 3 -3.7 3.2
 7 23 -3 -1.3 1.9
 7 -23 3 1.3 1.3
 7 23 4 205.18 10.7
 -7 -23 4 174.58 10.5
 -7 -23 -4 165.98 9.5
 7 -23 4 196.78 11.6
 7 23 -4 176.98 10.8
 7 23 4 208.48 12.8
 7 23 5 176.78 12.3
 7 23 -5 220.08 12.1
 7 23 5 177.98 10.1
 -7 -23 -5 165.58 9.8
 7 -23 5 208.38 12.2
 -7 -23 5 193.88 11.6
 7 23 6 306.87 13.6
 7 23 -6 252.87 13.5
 7 23 6 299.57 16.8
 -7 -23 -6 271.77 13
 7 -23 6 268.47 14
 -7 -23 6 258.07 14
 7 23 7 110.49 8.6
 7 23 7 101.39 10.3
 -7 -23 -7 122.29 8.8
 7 23 -7 141.49 10.3
 7 -23 7 124.99 9.9
 -7 -23 7 134.39 10.3
 7 23 8 25.4 4.7
 7 -23 8 16.3 3.6
 7 23 -8 20.8 4.4
 7 23 8 23.1 5.6
 -7 -23 8 17.4 3.7
 7 23 9 175.38 11.6
 -7 -23 9 192.88 13.4
 7 23 9 157.98 14.3
 7 23 10 400.06 23.7
 -7 -23 10 362.06 18.4
 -7 -23 11 380.96 18.8
 7 23 11 377.46 17.1
 -7 -23 12 46.8 6.7
 -7 -23 13 13.5 4.1
 -7 -23 14 5.8 2.4
 -7 -23 15 72.49 7.9
 -7 -23 16 30.2 5.3
 -7 -23 17 -0.9 1.9
 7 25 0 1598.44 33.6
 7 25 1 873.11 21.9
 7 25 1 903.51 25.7
 7 25 2 248.68 12
 7 25 -2 225.58 12.4
 7 25 2 237.88 13.6
 7 25 3 1.5 1.3
 7 25 -3 1.1 1.6
 7 -25 3 2.8 1.4
 7 25 4 13.1 2.8
 7 25 4 11.4 3.1
 7 25 -4 8.7 2.8
 7 -25 4 11.6 3.1
 7 25 5 79.59 7
 7 25 -5 101.69 8.6
 7 25 5 78.39 8.6
 7 -25 5 97.39 8.7
 -7 -25 5 91.39 8.3
 7 25 6 136.99 9.5
 7 25 -6 112.79 9.6
 7 25 6 133.19 11.9
 7 -25 6 123.69 9.8
 -7 -25 6 119.89 9.9
 7 25 7 8.6 2.8
 7 25 7 4.7 2.9
 7 25 -7 10.5 3.4
 7 -25 7 10 2.7
 -7 -25 7 4.2 1.9
 7 25 8 123.29 9.5
 7 25 -8 114.19 10.4
 7 -25 8 104.49 9.5
 7 25 8 115.79 12.3
 -7 -25 8 97.19 9
 7 25 -9 489.15 21.9
 -7 -25 9 448.76 20.5
 7 25 9 429.36 17.9
 -7 -25 -10 379.36 17.3
 7 25 10 424.16 17.9
 -7 -25 -11 520.15 20.9
 -7 -25 11 439.76 20.2
 -7 -25 12 122.09 10.7
 -7 -25 13 53.79 7
 -7 -25 14 -3.8 2.7
 -7 -25 15 8 2.9
 -7 -25 16 -1.5 2.1
 7 27 0 1360.46 28.4
 7 27 0 1358.76 33.2
 7 27 1 377.36 15.1
 7 27 -1 424.26 15.8
 7 27 -1 423.36 18
 7 27 1 398.16 18.4
 7 27 2 343.07 14.5
 7 27 -2 335.37 14
 7 27 -2 322.37 15.6
 7 27 2 344.47 17.2
 7 27 3 6.4 2.2
 7 27 3 1.5 2.5
 7 -27 3 7.5 2.3
 7 27 -3 8 2.4
 7 -27 4 19.2 4.1
 7 27 4 19.4 4.2
 7 27 -4 19.8 4
 7 27 4 23.6 4
 7 27 5 35.5 4.9
 7 27 -5 45.1 6.3
 7 -27 5 39.2 5.8
 7 27 5 30.8 5.6
 -7 -27 5 38.9 5.9
 7 27 6 49 5.9
 7 27 6 51.99 7.8
 7 27 -6 37.1 5.9
 7 -27 6 38.4 5.6
 -7 -27 6 43.6 6.1
 7 27 7 2.1 1.9
 7 27 -7 3.1 2
 7 27 7 2.1 2.6
 7 -27 7 2.1 1.6
 -7 -27 7 3.6 2
 7 27 8 194.98 11.7
 7 27 -8 173.78 13.3
 7 -27 8 167.48 12.4
 7 27 8 194.58 16.1
 -7 -27 8 148.09 11.7
 -7 -27 9 766.12 27.1
 7 27 9 729.93 23.2
 -7 -27 10 206.98 14.4
 7 27 10 259.47 14.4
 -7 -27 11 323.77 17.3
 -7 -27 12 87.29 9.2
 -7 -27 13 19.7 4.5
 -7 -27 14 -1.5 2
 -7 -27 15 11 3
 -7 -27 16 4.8 1.9
 7 29 0 595.24 23.2
 7 29 0 601.64 19.3
 7 29 -1 144.99 9.5
 7 29 1 132.69 9.3
 7 29 -1 150.38 11.4
 7 29 1 149.99 12.1
 7 29 2 37.1 4.9
 7 29 -2 39.7 5
 7 29 2 37.8 6.1
 7 29 -2 33.9 5.4
 7 29 3 2.4 1.5
 7 -29 3 2.3 2.2
 7 29 -3 1.2 1.5
 7 29 3 -0.4 2.5
 7 29 4 48.8 7.2
 7 29 4 56.49 6.2
 7 29 -4 43.3 6.2
 7 -29 4 48.8 6.4
 -7 -29 4 44.5 5.9
 7 29 5 70.89 7
 7 29 -5 81.59 8.7
 7 29 5 67.79 8.9
 7 -29 5 80.99 8.2
 -7 -29 5 82.79 8.3
 7 29 6 26 4.2
 7 29 6 32.5 6.7
 7 29 -6 23.5 4.9
 7 -29 6 20.1 4.3
 -7 -29 6 23.7 4.9
 7 29 7 1.9 2.5
 7 29 7 2.3 2.9
 7 29 -7 2.3 2.1
 7 -29 7 0.1 2.3
 -7 -29 7 3.8 2.5
 7 -29 8 139.79 11.4
 -7 -29 8 127.19 11
 7 29 8 166.58 11.2
 -7 -29 9 291.77 16.8
 7 29 9 290.57 14.9
 -7 -29 10 153.08 12.4
 -7 -29 11 234.48 14.6
 -7 -29 12 1.8 1.5
 -7 -29 13 5.1 2.9
 -7 -29 14 20.3 4.2
 -7 -29 15 53.99 6.4
 7 31 0 341.37 15
 7 31 0 367.26 19.4
 7 31 1 1.9 1.6
 7 31 1 3.2 1.6
 7 31 -1 4.3 1.8
 7 31 -1 4.5 2.6
 7 31 2 4.8 2.4
 7 31 2 4.1 2.4
 7 31 -2 3.6 2.3
 7 31 -3 35.3 5.9
 7 31 3 25.3 4.5
 7 31 3 28.4 5.8
 7 -31 3 29.9 5.2
 -7 -31 3 33.9 5.3
 7 31 4 209.78 12.2
 7 31 4 198.18 15.6
 7 31 -4 170.68 13
 7 -31 4 201.08 12.9
 -7 -31 4 207.68 13.2
 7 31 5 163.58 11.2
 7 31 5 159.38 14.5
 7 31 -5 195.08 14.2
 7 -31 5 194.78 13
 -7 -31 5 196.48 13.3
 7 31 6 141.49 9.9
 7 -31 6 125.19 10.6
 -7 -31 6 120.69 10.4
 7 31 7 7 2.1
 7 -31 7 5.6 1.7
 -7 -31 7 8.7 3.1
 7 31 8 4.4 2.4
 7 -31 8 -1.4 2.8
 -7 -31 8 1.9 2.2
 -7 -31 9 144.69 11.8
 7 31 9 138.09 10.4
 -7 -31 10 42.1 6.7
 -7 -31 11 50.89 6.9
 -7 -31 12 -0.7 2
 -7 -31 13 34.3 5
 -7 -31 13 50.89 6.5
 -7 -31 14 36 5.3
 -7 -31 15 112.29 8.5
 7 33 0 1.9 1.4
 7 33 0 2.9 2.1
 7 33 1 26.2 4.3
 7 33 1 24.2 5.6
 7 33 -1 27.6 4.4
 7 33 -1 32.7 6.3
 7 33 2 7.7 2.6
 7 33 2 5.2 2.4
 7 33 -2 8.8 3.7
 7 33 3 81.09 7.8
 -7 -33 3 84.19 8.6
 7 33 4 474.75 18.9
 7 -33 4 481.25 20.1
 -7 -33 4 468.95 20.3
 7 33 5 321.87 15.6
 7 -33 5 340.97 17.2
 -7 -33 5 374.96 18.2
 7 -33 6 240.68 14.6
 -7 -33 6 244.98 15.2
 7 33 6 268.17 14.1
 7 -33 7 302.07 16.6
 -7 -33 7 306.57 16.7
 7 33 7 255.47 14.1
 7 33 8 1.2 1.9
 -7 -33 8 -2.4 3.3
 -7 -33 9 17.7 4.5
 -7 -33 10 6.9 3.4
 -7 -33 11 11.4 3.2
 -7 -33 12 -0.9 1.8
 -7 -33 13 33.8 4.8
 -7 -33 13 44.4 6
 -7 -33 14 53.89 6.2
 7 35 0 280.27 13.9
 7 35 1 -0.6 1.6
 7 35 2 15.2 3.4
 -7 -35 2 10 3.4
 7 35 3 82.39 8.1
 -7 -35 3 107.59 9.7
 7 -35 4 508.05 20.4
 -7 -35 4 535.45 21.7
 7 35 4 535.55 19.8
 7 -35 5 286.67 15.7
 -7 -35 5 300.47 16.6
 7 35 5 259.87 14
 7 -35 6 429.26 19.6
 -7 -35 6 459.05 20.9
 7 35 6 469.25 18.6
 7 -35 7 252.77 15.2
 -7 -35 7 252.37 15.3
 7 35 7 242.78 13.3
 -7 -35 8 18.8 4.8
 -7 -35 9 6.1 3.1
 -7 -35 10 0.1 1.5
 -7 -35 11 -0.3 1.5
 -7 -35 12 -2.9 2.1
 -7 -35 13 57.89 6.2
 7 37 1 9.9 2.9
 -7 -37 1 8.8 3.3
 -7 -37 2 46.2 6.6
 7 37 2 39.3 5.2
 7 37 3 28.7 4.6
 -7 -37 3 31.6 5.6
 -7 -37 4 266.47 15.6
 7 37 4 256.77 13.9
 7 -37 5 280.57 15.4
 -7 -37 5 314.57 17.5
 7 37 5 272.77 14.1
 7 -37 6 214.08 13.6
 -7 -37 6 206.08 13.6
 -7 -37 7 122.59 10.8
 -7 -37 8 4.5 2.7
 -7 -37 9 19.9 4.4
 -7 -37 10 3.5 2.2
 -7 -37 11 27.6 4.4
 -7 -37 12 2.1 2
 -7 -39 0 319.57 17
 7 39 1 21.6 3.9
 -7 -39 1 23.6 5.2
 -7 -39 -1 21.3 5.2
 -7 -39 2 50.49 7.1
 7 39 2 44.9 5.5
 7 39 3 1.1 1.3
 -7 -39 3 4.3 2.6
 -7 -39 4 78.19 8.5
 -7 -39 5 78.79 8.3
 -7 -39 6 73.19 8.1
 -7 -39 7 8.8 3.2
 -7 -39 8 11.6 3.4
 -7 -39 9 153.98 11
 -7 -39 10 10.8 3.1
 -7 -41 0 348.17 17.7
 -7 -41 1 9.9 3.9
 -7 -41 -1 10.2 3.9
 -7 -41 2 150.08 11.5
 -7 -41 -2 146.29 11.5
 -7 -41 3 2.7 3
 -7 -41 -3 -0.4 2.3
 -7 -41 4 17.5 3.7
 -7 -41 5 -4.2 3
 -7 -41 6 4.6 2.3
 -7 -41 7 18 3.9
 -7 -41 8 45.6 6.3
 -7 -41 9 348.47 15.3
 -7 -43 0 490.15 20.3
 -7 -43 1 22.4 4.8
 -7 -43 -1 24 5.1
 -7 -43 2 165.68 12.2
 -7 -43 -2 162.18 11.9
 -7 -43 3 5.8 2.8
 -7 -43 -3 3.6 1.6
 -7 -43 4 2.1 1.8
 -7 -43 -4 2.3 2.1
 -7 -43 5 3 2.3
 -7 -43 -5 0.6 1.6
 -7 -43 6 4.7 2.6
 -7 -43 -6 1.4 1.8
 -7 -43 7 33.6 5.1
 -7 -43 8 46.4 5.5
 -7 -45 0 583.04 21.6
 -7 -45 1 22.7 4.6
 -7 -45 -1 23.7 4.6
 -7 -45 2 114.99 9.2
 -7 -45 -2 117.59 9.5
 -7 -45 3 3.1 1.9
 -7 -45 -3 1.8 1.5
 -7 -45 4 2.2 2
 -7 -45 -4 0.1 1.3
 -7 -45 5 6.8 2.4
 -7 -45 6 10.9 2.9
 -7 -47 0 286.57 14
 -7 -47 1 8.7 2.7
 8 0 0 546.15 10.8
 8 0 1 6.6 1.4
 8 0 -1 4.8 1.1
 8 0 -2 91.29 3.9
 8 0 2 93.39 5.4
 8 0 3 2.7 1.2
 8 0 -3 1.1 0.5
 8 0 -4 87.29 3.8
 8 0 4 91.59 6.3
 8 0 5 678.53 18.1
 8 0 6 845.52 21.7
 8 0 7 1005.6 25.6
 8 0 8 174.58 11.1
 -8 0 8 166.78 9.6
 -8 0 9 14.7 3
 -8 0 10 -2.2 2.1
 -8 0 11 -3.7 2.6
 -8 0 12 -1 1.9
 -8 0 13 110.49 9.2
 -8 0 14 37.6 5.6
 -8 0 15 313.07 16.3
 -8 0 16 95.99 9.7
 -8 0 17 60.89 7.1
 -8 0 18 2.6 1.3
 8 -2 0 193.98 6.2
 8 2 0 201.98 7.2
 8 -2 1 8.3 1.6
 8 -2 -1 7.1 1.1
 8 2 1 7.2 1.5
 8 2 -1 7 1.3
 8 -2 2 4 1.3
 8 2 2 4 1.3
 8 -2 -2 2.3 0.6
 8 2 -2 3.6 1.1
 8 2 -3 38.8 2.8
 8 -2 3 41.3 3.9
 8 -2 -3 33.9 1.9
 8 2 3 44.7 4.1
 8 2 -4 256.27 7.3
 8 -2 4 238.88 10.2
 8 2 4 243.98 10.2
 8 2 5 355.66 13.4
 8 -2 5 376.76 13.7
 8 2 6 1022.4 23.6
 8 -2 6 1009.6 24.2
 -8 2 7 489.95 15.8
 -8 -2 7 493.95 15.8
 -8 -2 8 6.5 2.2
 8 2 8 2 1.4
 -8 2 8 4.9 1.8
 8 2 9 25.4 5.4
 -8 2 9 29.6 4.2
 -8 -2 9 26.4 4.2
 -8 2 10 14.8 3.2
 -8 -2 10 16.4 3.4
 -8 2 11 12 2.6
 -8 -2 11 13.6 3.2
 -8 2 12 -0.7 2
 -8 -2 12 -2.6 2.8
 -8 2 13 52.19 6.3
 -8 -2 13 61.89 6.9
 -8 2 14 4.7 1.9
 -8 -2 14 9.3 2.9
 -8 2 15 268.37 15.2
 -8 -2 15 254.37 15.6
 -8 2 16 69.09 8.7
 -8 -2 16 76.29 8.9
 -8 -2 17 18.7 4.1
 -8 2 17 7.8 3.5
 -8 -2 18 -2.2 1.7
 8 4 0 89.19 5
 8 -4 0 83.69 4
 8 4 -1 30.3 2.8
 8 4 1 24.2 2.7
 8 -4 1 26.8 2.7
 8 -4 2 34.8 3.5
 8 4 2 36.4 3.5
 8 4 -2 31.5 2.7
 8 4 3 12.9 2.2
 8 4 -3 12.4 1.8
 8 -4 3 10.3 2.3
 8 -4 4 114.69 7.4
 8 4 -4 122.59 5.5
 8 4 4 128.89 7.4
 8 4 5 13.2 2.3
 8 4 6 23.4 3.5
 8 4 7 63.29 6.3
 -8 4 7 50.19 5.1
 -8 -4 7 49.7 5
 -8 -4 8 21.1 3.6
 -8 4 8 18.7 3.4
 8 4 8 17.3 3.6
 8 4 9 180.88 12
 -8 4 9 166.18 10
 -8 -4 9 173.98 10.1
 -8 -4 10 13.3 3.1
 8 4 10 11.6 3.7
 -8 4 10 9.2 2.3
 -8 4 11 59.99 6.5
 -8 -4 11 66.49 7.1
 -8 4 12 2.7 1.8
 -8 -4 12 1.9 1.3
 -8 4 13 47.6 6.4
 -8 -4 13 46 6.2
 -8 4 14 40 5.8
 -8 -4 14 37.9 5.5
 -8 4 15 220.78 14.4
 -8 -4 15 241.28 14.6
 -8 4 16 3.8 3.1
 -8 -4 16 15.5 3.4
 -8 4 17 -0.1 2
 -8 -4 17 2.3 1.7
 -8 -4 18 15.5 3.5
 -8 -4 19 12.9 3.3
 8 6 0 1177.88 18.8
 8 6 -1 20.1 2.5
 8 6 1 14.4 1.9
 8 6 2 99.79 6
 8 6 -2 95.79 5.1
 8 6 -3 18.9 2.2
 8 6 3 18.2 2.8
 8 6 -4 4.2 1.5
 8 6 4 4.9 1.8
 8 6 5 19.7 3.1
 -8 -6 6 82.09 6.6
 8 6 6 52.89 5.4
 8 6 7 285.57 13.6
 -8 6 7 237.08 10.9
 -8 6 8 123.29 8.3
 8 6 8 112.49 9.2
 -8 -6 8 137.79 8.8
 -8 6 9 676.23 20.2
 -8 -6 9 680.13 20.3
 8 6 9 682.03 23.8
 -8 6 10 52.69 5.9
 8 6 10 57.49 7.6
 -8 -6 10 63.99 6.5
 -8 6 11 277.57 13.9
 -8 -6 11 294.47 14.7
 -8 6 12 4.8 2.3
 -8 -6 12 2.6 2.4
 -8 6 13 0.9 1.6
 -8 -6 13 -0.8 2.1
 -8 6 14 32.8 5.2
 -8 -6 14 32.2 5.3
 -8 6 15 12.5 3.2
 -8 -6 15 7.7 1.9
 -8 6 16 0.3 2
 -8 -6 16 2.5 1.7
 -8 -6 17 15 3.7
 -8 -6 18 46.1 6
 -8 -6 19 43.4 5.7
 8 8 0 4195.48 37.3
 8 8 -1 124.09 6.2
 8 8 1 145.69 7.2
 8 8 -2 286.17 9.1
 8 8 2 271.67 10.2
 8 8 -3 2.5 1
 8 8 3 2.7 1.5
 8 8 -4 37.1 3.5
 8 8 4 42.7 4.6
 -8 -8 5 8.7 2
 8 8 5 13.1 2.6
 -8 -8 6 -0.3 1.9
 8 8 6 0.3 1.6
 -8 8 7 330.27 13.2
 8 8 7 369.06 15.8
 8 8 8 308.67 12.9
 8 8 8 359.96 16.5
 -8 8 8 346.07 14.1
 8 8 9 747.63 20.6
 -8 8 9 806.32 22.5
 8 8 9 803.92 25.9
 -8 -8 9 810.22 22.5
[truncated: 169,310 more chars]
