# Supplementary material
Source: publisher figshare collection journal article supplement (https://acs.figshare.com/ndownloader/files/16775912)
Supplement: Supplementary file 1 [file 16775912 › LIFM-114-DCM-solved.cif]

data_LIFM-114-DCM
_audit_creation_date              2017-12-03
_audit_creation_method
;
Olex2 1.2
(compiled 2017.03.02 svn.r3394 for OlexSys, GUI svn.r5381)
;
_shelx_SHELXL_version_number      '2014/7'
_publ_contact_author_address      ?
_publ_contact_author_email        ?
_publ_contact_author_id_orcid     ?
_publ_contact_author_name         ''
_publ_contact_author_phone        ?
_publ_section_references
;
Dolomanov, O.V., Bourhis, L.J., Gildea, R.J, Howard, J.A.K. & Puschmann, H.
 (2009), J. Appl. Cryst. 42, 339-341.

Sheldrick, G.M. (2015). Acta Cryst. C71, 3-8.
;
_chemical_name_common             LIFM-114-DCM
_chemical_name_systematic         ?
_chemical_formula_moiety
 'C108 H64 O32 Zr6 [+ solvent]'
_chemical_formula_sum             'C108 H64 O32 Zr6'
_chemical_formula_weight          2420.91
_chemical_melting_point           ?
loop_
  _atom_type_symbol
  _atom_type_description
  _atom_type_scat_dispersion_real
  _atom_type_scat_dispersion_imag
  _atom_type_scat_source
 'C' 'C' 0.0181 0.0091 'International Tables Vol C Tables 4.2.6.8 and 6.1.1.4'
 'O' 'O' 0.0492 0.0322 'International Tables Vol C Tables 4.2.6.8 and 6.1.1.4'
 'Zr' 'Zr' -0.1862 2.2449
 'International Tables Vol C Tables 4.2.6.8 and 6.1.1.4'
 'H' 'H' 0.0000 0.0000 'International Tables Vol C Tables 4.2.6.8 and 6.1.1.4'

_shelx_space_group_comment
;
The symmetry employed for this shelxl refinement is uniquely defined
by the following loop, which should always be used as a source of
symmetry information in preference to the above space-group names.
They are only intended as comments.
;
_space_group_crystal_system       'orthorhombic'
_space_group_IT_number            65
_space_group_name_H-M_alt         'C m m m'
_space_group_name_Hall            '-C 2 2'
loop_
  _space_group_symop_operation_xyz
 'x, y, z'
 '-x, -y, z'
 'x, -y, -z'
 '-x, y, -z'
 'x+1/2, y+1/2, z'
 '-x+1/2, -y+1/2, z'
 'x+1/2, -y+1/2, -z'
 '-x+1/2, y+1/2, -z'
 '-x, -y, -z'
 'x, y, -z'
 '-x, y, z'
 'x, -y, z'
 '-x+1/2, -y+1/2, -z'
 'x+1/2, y+1/2, -z'
 '-x+1/2, y+1/2, z'
 'x+1/2, -y+1/2, z'

_cell_length_a                    21.4419(8)
_cell_length_b                    42.3169(10)
_cell_length_c                    17.9262(5)
_cell_angle_alpha                 90
_cell_angle_beta                  90
_cell_angle_gamma                 90
_cell_volume                      16265.4(8)
_cell_formula_units_Z             4
_cell_measurement_reflns_used     5477
_cell_measurement_temperature     150(2)
_cell_measurement_theta_max       65.2890
_cell_measurement_theta_min       4.4750
_shelx_estimated_absorpt_T_max    ?
_shelx_estimated_absorpt_T_min    ?
_exptl_absorpt_coefficient_mu     3.474
_exptl_absorpt_correction_T_max   1.00000
_exptl_absorpt_correction_T_min   0.57141
_exptl_absorpt_correction_type    multi-scan
_exptl_absorpt_process_details
;
CrysAlisPro 1.171.38.43 (Rigaku Oxford Diffraction, 2015)
Empirical absorption correction using spherical harmonics,
 implemented in SCALE3 ABSPACK scaling algorithm.
;
_exptl_absorpt_special_details    ?
_exptl_crystal_colour             Colourless
_exptl_crystal_density_diffrn     0.989
_exptl_crystal_density_meas       ?
_exptl_crystal_density_method     ?
_exptl_crystal_description        Rod
_exptl_crystal_F_000              4832
_exptl_crystal_size_max           0.3
_exptl_crystal_size_mid           0.1
_exptl_crystal_size_min           0.1
_exptl_transmission_factor_max    ?
_exptl_transmission_factor_min    ?
_diffrn_reflns_av_R_equivalents   0.0414
_diffrn_reflns_av_unetI/netI      0.0408
_diffrn_reflns_Laue_measured_fraction_full 0.979
_diffrn_reflns_Laue_measured_fraction_max 0.979
_diffrn_reflns_limit_h_max        24
_diffrn_reflns_limit_h_min        -14
_diffrn_reflns_limit_k_max        48
_diffrn_reflns_limit_k_min        -34
_diffrn_reflns_limit_l_max        20
_diffrn_reflns_limit_l_min        -18
_diffrn_reflns_number             18939
_diffrn_reflns_point_group_measured_fraction_full 0.979
_diffrn_reflns_point_group_measured_fraction_max 0.979
_diffrn_reflns_theta_full         65.353
_diffrn_reflns_theta_max          65.353
_diffrn_reflns_theta_min          3.751
_diffrn_ambient_environment       N~2~
_diffrn_ambient_temperature       150(2)
_diffrn_detector                  'CCD plate'
_diffrn_detector_area_resol_mean  10.6525
_diffrn_detector_type             Atlas
_diffrn_measured_fraction_theta_full 0.979
_diffrn_measured_fraction_theta_max 0.979
_diffrn_measurement_details
;
List of Runs (angles in degrees, time in seconds):

  # Type    Start    End  Width  t~exp~   \w     \q     \k     \f   Frames
--------------------------------------------------------------------------
  1  \w    -82.00  34.00   1.00  150.00    --  -41.14  19.00 -60.00  116
  2  \w    108.00 160.00   1.00  140.00    --   89.96 125.00-180.00   52
  3  \w     30.00  56.00   1.00  140.00    --   89.96 -30.00-150.00   26
  4  \w     82.00 110.00   1.00  140.00    --   89.96 -30.00-150.00   28
  5  \w     96.00 163.00   1.00  140.00    --   89.96 125.00   0.00   67
  6  \w     78.00 158.00   1.00  140.00    --   89.96  61.00-180.00   80
;
_diffrn_measurement_device        'four-circle diffractometer'
_diffrn_measurement_device_type   'SuperNova, Dual, Cu at zero, Atlas'
_diffrn_measurement_method        '\w scans'
_diffrn_orient_matrix_type
'CrysAlisPro convention (1999,Acta A55,543-557)'
_diffrn_orient_matrix_UB_11       -0.0013912000
_diffrn_orient_matrix_UB_12       0.0349778000
_diffrn_orient_matrix_UB_13       0.0236386000
_diffrn_orient_matrix_UB_21       -0.0396092000
_diffrn_orient_matrix_UB_22       -0.0087532000
_diffrn_orient_matrix_UB_23       0.0687319000
_diffrn_orient_matrix_UB_31       0.0598639000
_diffrn_orient_matrix_UB_32       -0.0050207000
_diffrn_orient_matrix_UB_33       0.0459879000
_diffrn_radiation_monochromator   mirror
_diffrn_radiation_probe           x-ray
_diffrn_radiation_type            CuK\a
_diffrn_radiation_wavelength      1.54184
_diffrn_source                    'micro-focus sealed X-ray tube'
_diffrn_source_type               'SuperNova (Cu) X-ray Source'
_reflns_Friedel_coverage          0.000
_reflns_Friedel_fraction_full     .
_reflns_Friedel_fraction_max      .
_reflns_number_gt                 5708
_reflns_number_total              7377
_reflns_odcompleteness_completeness 99.81
_reflns_odcompleteness_iscentric  1
_reflns_odcompleteness_theta      61.08
_reflns_special_details
;
 Reflections were merged by SHELXL according to the crystal
 class for the calculation of statistics and refinement.
 
 Structure factors included contributions from the .fab file.
 
 _reflns_Friedel_fraction is defined as the number of unique
 Friedel pairs measured divided by the number that would be
 possible theoretically, ignoring centric projections and
 systematic absences.
;
_reflns_threshold_expression      'I > 2\s(I)'
_computing_cell_refinement        'CrysAlisPro 1.171.38.43 (Rigaku OD, 2015)'
_computing_data_collection        'CrysAlisPro 1.171.38.43 (Rigaku OD, 2015)'
_computing_data_reduction         'CrysAlisPro 1.171.38.43 (Rigaku OD, 2015)'
_computing_molecular_graphics     'Olex2 (Dolomanov et al., 2009)'
_computing_publication_material   'Olex2 (Dolomanov et al., 2009)'
_computing_structure_refinement   'ShelXL (Sheldrick, 2015)'
_computing_structure_solution     ?
_refine_diff_density_max          1.475
_refine_diff_density_min          -4.000
_refine_diff_density_rms          0.201
_refine_ls_extinction_coef        .
_refine_ls_extinction_method      none
_refine_ls_goodness_of_fit_ref    1.692
_refine_ls_hydrogen_treatment     constr
_refine_ls_matrix_type            full
_refine_ls_number_parameters      481
_refine_ls_number_reflns          7377
_refine_ls_number_restraints      643
_refine_ls_R_factor_all           0.1428
_refine_ls_R_factor_gt            0.1295
_refine_ls_restrained_S_all       1.722
_refine_ls_shift/su_max           0.000
_refine_ls_shift/su_mean          0.000
_refine_ls_structure_factor_coef  Fsqd
_refine_ls_weighting_details
'w=1/[\s^2^(Fo^2^)+(0.2000P)^2^] where P=(Fo^2^+2Fc^2^)/3'
_refine_ls_weighting_scheme       calc
_refine_ls_wR_factor_gt           0.3874
_refine_ls_wR_factor_ref          0.4043
_refine_special_details           ?
_olex2_refinement_description
;
1. Fixed Uiso
 At 1.2 times of:
  All C(H) groups
2. Restrained distances
 C8-C9A = C9A-C10A = C10A-C11
 1.39 with sigma of 0.01
 C11-C12A = C12A-C13A = C13A-C8
 1.39 with sigma of 0.01
 C8-C10A = C9A-C11 = C10A-C12A
 2.4 with sigma of 0.01
 C11-C13A = C12A-C8 = C13A-C9A
 2.4 with sigma of 0.01
 C9A-C12A = C10A-C13A
 2.8 with sigma of 0.01
 C15-C16 = C19-C22 = C25-C28
 1.49 with sigma of 0.01
 C15A-C16A = C19A-C22A = C25A-C29
 1.49 with sigma of 0.01
 C28-C29
 1.41 with sigma of 0.01
 C15-O3 = C15-O4 = C15A-O3A = C15A-O4A
 1.29 with sigma of 0.01
 Zr3-O9 = Zr4-O9 = Zr5-O9
 2.15 with sigma of 0.02
 Zr3-O14 = Zr4-O14
 2.15 with sigma of 0.02
 Zr3-O3
 2.094 with sigma of 0.01
 Zr4-O4
 2.127 with sigma of 0.01
 Zr3_$1-O3A
 2.105 with sigma of 0.01
 Zr5_$1-O4A
 2.138 with sigma of 0.01
 O14-O14A
 1.681 with sigma of 0.01
 O11-O12 = O10-O11 = O12-O13
 3.2 with sigma of 0.01
 Zr3-O14A
 1.264 with sigma of 0.01
 Zr4-O10 = Zr4-O11 = Zr5-O12 = Zr5-O13
 2.25 with sigma of 0.02
3. Restrained planarity
 C8, C9A, C10A, C11, C12A, C13A
 with sigma of 0.01
4. Rigid bond restraints
 Zr3, Zr4, Zr5, O9, O10, O11, O12, O13, O14, O14A
 with sigma for 1-2 distances of 0.01 and sigma for 1-3 distances of 0.01
 O3, O4, C15, C16, C17, C18, C19, C20, C21, C22, C23, C24, C25, C26, C27, C28,
 C29, C15A, C16A, C17A, C18A, C19A, C20A, C21A, C22A, C23A, C24A, C25A, C26A,
 C27A, O3A, O4A
 with sigma for 1-2 distances of 0.01 and sigma for 1-3 distances of 0.01
 C8, C9, C10, C11, C12, C13, C9A, C10A, C12A, C13A
 with sigma for 1-2 distances of 0.01 and sigma for 1-3 distances of 0.01
 Zr1, Zr2, O1, O2, O5, O6, O7, O8
 with sigma for 1-2 distances of 0.01 and sigma for 1-3 distances of 0.01
5. Uiso/Uaniso restraints and constraints
Zr3 \\sim Zr4 \\sim Zr5 \\sim O9 \\sim O10 \\sim O11 \\sim O12 \\sim O13 \\sim
O14 \\sim O14A: within 2A with sigma of 0.01 and sigma for terminal atoms of
0.02
O3 \\sim O4 \\sim C15 \\sim C16 \\sim C17 \\sim C18 \\sim C19 \\sim C20 \\sim
C21 \\sim C22 \\sim C23 \\sim C24 \\sim C25 \\sim C26 \\sim C27 \\sim C28 \\sim
C29 \\sim C15A \\sim C16A \\sim C17A \\sim C18A \\sim C19A \\sim C20A \\sim
C21A \\sim C22A \\sim C23A \\sim C24A \\sim C25A \\sim C26A \\sim C27A \\sim
O3A \\sim O4A: within 2A with sigma of 0.01 and sigma for terminal atoms of 0.02
C8 \\sim C9 \\sim C10 \\sim C11 \\sim C12 \\sim C13 \\sim C9A \\sim C10A \\sim
C12A \\sim C13A: within 2A with sigma of 0.01 and sigma for terminal atoms of
0.02
Zr1 \\sim Zr2 \\sim O1 \\sim O2 \\sim O5 \\sim O6 \\sim O7 \\sim O8: within 2A
with sigma of 0.01 and sigma for terminal atoms of 0.02
Uanis(O13) \\sim Ueq, Uanis(C1) \\sim Ueq, Uanis(C2) \\sim Ueq, Uanis(C3) \\sim
Ueq, Uanis(C4) \\sim Ueq, Uanis(C5) \\sim Ueq, Uanis(C6) \\sim Ueq, Uanis(C7)
\\sim Ueq, Uanis(C8) \\sim Ueq, Uanis(C9) \\sim Ueq, Uanis(C10) \\sim Ueq,
Uanis(C11) \\sim Ueq, Uanis(C12) \\sim Ueq, Uanis(C13) \\sim Ueq, Uanis(C14)
\\sim Ueq, Uanis(O5) \\sim Ueq: with sigma of 0.01 and sigma for terminal atoms
of 0.02
Uanis(O8) \\sim Ueq: with sigma of 0.002 and sigma for terminal atoms of 0.01
6. Others
 Fixed Sof: Zr3(0.25) Zr4(0.25) Zr5(0.25) O3(0.5) O4(0.5) O9(0.5) O10(0.25)
 O11(0.25) O12(0.25) O13(0.25) O14(0.25) C9(0.5) H9(0.5) C10(0.5) H10(0.5)
 C12(0.5) H12(0.5) C13(0.5) H13(0.5) C15(0.5) C16(0.5) C17(0.5) H17(0.5)
 C18(0.5) H18(0.5) C19(0.5) C20(0.5) H20(0.5) C21(0.5) H21(0.5) C22(0.5)
 C23(0.5) H23(0.5) C24(0.5) H24(0.5) C25(0.5) C26(0.5) H26(0.5) C27(0.5)
 H27(0.5) C29(0.25) O3A(0.5) O4A(0.5) O14A(0.25) C9A(0.5) H9A(0.5) C10A(0.5)
 H10A(0.5) C12A(0.5) H12A(0.5) C13A(0.5) H13A(0.5) C15A(0.5) C16A(0.5)
 C17A(0.5) H17A(0.5) C18A(0.5) H18A(0.5) C19A(0.5) C20A(0.5) H20A(0.5)
 C21A(0.5) H21A(0.5) C22A(0.5) C23A(0.5) H23A(0.5) C24A(0.5) H24A(0.5)
 C25A(0.5) C26A(0.5) H26A(0.5) C27A(0.5) H27A(0.5)
7.a Riding coordinates:
 C24(H24), C26(H26), C24A(H24A), C26A(H26A)
7.b Aromatic/amide H refined with riding coordinates:
 C3(H3), C4(H4), C6(H6), C7(H7), C9(H9), C10(H10), C12(H12), C13(H13),
 C17(H17), C18(H18), C20(H20), C21(H21), C23(H23), C27(H27), C9A(H9A),
 C10A(H10A), C12A(H12A), C13A(H13A), C17A(H17A), C18A(H18A), C20A(H20A),
 C21A(H21A), C23A(H23A), C27A(H27A)
7.c Fitted hexagon refined as free rotating group:
 C2(C3,C4,C5,C6,C7), C8(C9,C10,C11,C12,C13), C16(C17,C18,C19,C20,C21), C22(C23,
 C24,C25,C26,C27), C16A(C17A,C18A,C19A,C20A,C21A), C22A(C23A,C24A,C25A,C26A,
 C27A)
;
_atom_sites_solution_hydrogens    mixed
_atom_sites_solution_primary      ?
_atom_sites_solution_secondary    ?
loop_
  _atom_site_label
  _atom_site_type_symbol
  _atom_site_fract_x
  _atom_site_fract_y
  _atom_site_fract_z
  _atom_site_U_iso_or_equiv
  _atom_site_adp_type
  _atom_site_occupancy
  _atom_site_site_symmetry_order
  _atom_site_calc_flag
  _atom_site_refinement_flags_posn
  _atom_site_refinement_flags_adp
  _atom_site_refinement_flags_occupancy
  _atom_site_disorder_assembly
  _atom_site_disorder_group
 Zr1 Zr 0.41779(4) 0.0000 0.40114(4) 0.0447(4) Uani 1 2 d S TU P . .
 Zr2 Zr 0.5000 0.05797(2) 0.5000 0.0336(4) Uani 1 4 d S TU P . .
 Zr3 Zr 0.0000 0.94198(5) 0.04448(13) 0.0695(6) Uani 0.5 2 d DS TU P A 1
 Zr4 Zr 0.08160(12) 1.0000 0.14402(16) 0.0790(8) Uani 0.5 2 d DS TU P A 1
 Zr5 Zr 0.08295(11) 1.0000 -0.05258(15) 0.0748(7) Uani 0.5 2 d DS TU P A 1
 O1 O 0.3869(3) 0.04811(12) 0.3593(3) 0.0792(18) Uani 1 1 d . U . . .
 O2 O 0.4380(3) 0.08470(11) 0.4259(3) 0.0533(12) Uani 1 1 d . U . . .
 O3 O 0.0588(7) 0.9169(3) 0.1197(8) 0.106(4) Uani 0.5 1 d D U . A 1
 O4 O 0.1136(8) 0.9543(2) 0.1822(9) 0.120(4) Uani 0.5 1 d D U . A 1
 O5 O 0.4178(4) 0.0281(2) 0.5000 0.074(2) Uani 1 2 d S TU P . .
 O6 O 0.5000 0.0283(2) 0.4004(5) 0.087(3) Uani 1 2 d S TU P . .
 O7 O 0.3163(4) 0.0000 0.4032(6) 0.081(2) Uani 1 2 d S TU P . .
 O8 O 0.4237(4) 0.0000 0.2782(4) 0.078(2) Uani 1 2 d S TU P . .
 O9 O 0.0846(6) 0.9708(3) 0.0460(7) 0.101(4) Uani 0.5 1 d D U . A 1
 O10 O 0.0769(7) 1.0000 0.2644(7) 0.111(7) Uani 0.5 2 d DS TU P A 1
 O11 O 0.1851(6) 1.0000 0.1405(8) 0.152(10) Uani 0.5 2 d DS TU P A 1
 O12 O 0.1860(6) 1.0000 -0.0390(8) 0.131(7) Uani 0.5 2 d DS TU P A 1
 O13 O 0.0912(10) 1.0000 -0.1775(8) 0.125(7) Uani 0.5 2 d DS TU P A 1
 O14 O 0.0000 0.9701(4) 0.1438(7) 0.091(4) Uani 0.5 2 d DS TU P A 1
 C1 C 0.4041(4) 0.07597(17) 0.3735(4) 0.0545(18) Uani 1 1 d . U . . .
 C2 C 0.3828(3) 0.10121(11) 0.3202(3) 0.062(2) Uani 1 1 d . U . . .
 C3 C 0.4069(3) 0.13156(13) 0.3275(3) 0.079(3) Uani 1 1 d G U . . .
 H3 H 0.4360 0.1361 0.3659 0.094 Uiso 1 1 calc R . . . .
 C4 C 0.3884(3) 0.15521(10) 0.2784(3) 0.089(3) Uani 1 1 d G U . . .
 H4 H 0.4049 0.1759 0.2833 0.106 Uiso 1 1 calc R . . . .
 C5 C 0.3459(3) 0.14851(12) 0.2221(3) 0.071(2) Uani 1 1 d G U . . .
 C6 C 0.3218(3) 0.11816(14) 0.2148(3) 0.106(3) Uani 1 1 d G U . . .
 H6 H 0.2927 0.1136 0.1763 0.128 Uiso 1 1 calc R . . . .
 C7 C 0.3403(3) 0.09452(10) 0.2639(4) 0.099(3) Uani 1 1 d G U . . .
 H7 H 0.3238 0.0738 0.2589 0.119 Uiso 1 1 calc R . . . .
 C8 C 0.3220(4) 0.17436(15) 0.1707(4) 0.081(2) Uani 1 1 d D U . . .
 C9 C 0.2584(3) 0.1808(2) 0.1701(5) 0.087(3) Uani 0.5 1 d G U . B 1
 H9 H 0.2308 0.1686 0.1998 0.105 Uiso 0.5 1 calc R . . B 1
 C10 C 0.2354(3) 0.2052(2) 0.1260(6) 0.085(3) Uani 0.5 1 d G U . B 1
 H10 H 0.1919 0.2096 0.1255 0.102 Uiso 0.5 1 calc R . . B 1
 C11 C 0.2758(4) 0.22306(14) 0.0825(4) 0.0752(19) Uani 1 1 d DG U . B .
 C12 C 0.3394(3) 0.2166(2) 0.0831(5) 0.083(3) Uani 0.5 1 d G U . B 1
 H12 H 0.3670 0.2288 0.0534 0.100 Uiso 0.5 1 calc R . . B 1
 C13 C 0.3625(3) 0.1922(2) 0.1272(6) 0.087(3) Uani 0.5 1 d G U . B 1
 H13 H 0.4059 0.1878 0.1277 0.104 Uiso 0.5 1 calc R . . B 1
 C14 C 0.2500 0.2500 0.0370(6) 0.071(3) Uani 1 2 d S TU P . .
 C15 C 0.0939(10) 0.9253(3) 0.1753(11) 0.112(4) Uani 0.5 1 d D U . A 1
 C16 C 0.1160(8) 0.8989(3) 0.2238(7) 0.115(4) Uani 0.5 1 d D U . A 1
 C17 C 0.1660(8) 0.9046(3) 0.2713(9) 0.117(4) Uani 0.5 1 d G U . A 1
 H17 H 0.1867 0.9244 0.2702 0.141 Uiso 0.5 1 calc R . . A 1
 C18 C 0.1858(7) 0.8812(4) 0.3203(8) 0.119(4) Uani 0.5 1 d G U . A 1
 H18 H 0.2200 0.8850 0.3528 0.142 Uiso 0.5 1 calc R . . A 1
 C19 C 0.1556(8) 0.8521(3) 0.3219(8) 0.118(4) Uani 0.5 1 d DG U . A 1
 C20 C 0.1056(8) 0.8465(3) 0.2744(9) 0.119(4) Uani 0.5 1 d G U . A 1
 H20 H 0.0849 0.8266 0.2754 0.143 Uiso 0.5 1 calc R . . A 1
 C21 C 0.0858(7) 0.8698(4) 0.2254(8) 0.116(4) Uani 0.5 1 d G U . A 1
 H21 H 0.0516 0.8660 0.1929 0.140 Uiso 0.5 1 calc R . . A 1
 C22 C 0.1821(8) 0.8280(3) 0.3736(8) 0.118(4) Uani 0.5 1 d D U . A 1
 C23 C 0.2458(7) 0.8218(3) 0.3739(8) 0.118(4) Uani 0.5 1 d G U . A 1
 H23 H 0.2733 0.8344 0.3451 0.142 Uiso 0.5 1 calc R . . A 1
 C24 C 0.2691(5) 0.7969(4) 0.4162(9) 0.122(4) Uani 0.5 1 d G U . A 1
 H24 H 0.3126 0.7926 0.4164 0.146 Uiso 0.5 1 d R . . A 1
 C25 C 0.2288(7) 0.7784(3) 0.4583(7) 0.121(4) Uani 0.5 1 d DG U . A 1
 C26 C 0.1652(7) 0.7847(3) 0.4581(7) 0.114(4) Uani 0.5 1 d G U . A 1
 H26 H 0.1377 0.7720 0.4869 0.137 Uiso 0.5 1 d R . . A 1
 C27 C 0.1418(6) 0.8095(4) 0.4157(8) 0.118(4) Uani 0.5 1 d G U . A 1
 H27 H 0.0984 0.8138 0.4155 0.142 Uiso 0.5 1 calc R . . A 1
 C28 C 0.2500 0.7500 0.5000 0.121(5) Uani 1 4 d DS TU P C 3
 C29 C 0.2500 0.7500 0.5794(5) 0.118(7) Uani 0.5 2 d DS TU P C 3
 O3A O 0.4397(7) 0.5835(3) 0.9708(6) 0.106(4) Uani 0.5 1 d D U . D 2
 O4A O 0.3906(8) 0.5463(2) 0.9085(9) 0.112(5) Uani 0.5 1 d D U . D 2
 O14A O 0.0000 0.9715(2) 0.0506(8) 0.077(4) Uani 0.5 2 d DS TU P E 2
 C9A C 0.2730(5) 0.16852(19) 0.1216(6) 0.082(3) Uani 0.5 1 d D U . B 2
 H9A H 0.2555 0.1479 0.1182 0.099 Uiso 0.5 1 calc R . . B 2
 C10A C 0.2498(5) 0.1929(2) 0.0774(6) 0.085(3) Uani 0.5 1 d D U . B 2
 H10A H 0.2163 0.1890 0.0439 0.102 Uiso 0.5 1 calc R . . B 2
 C12A C 0.3243(5) 0.22869(19) 0.1316(6) 0.088(3) Uani 0.5 1 d D U . B 2
 H12A H 0.3417 0.2493 0.1351 0.106 Uiso 0.5 1 calc R . . B 2
 C13A C 0.3476(5) 0.2044(2) 0.1757(6) 0.087(3) Uani 0.5 1 d D U . B 2
 H13A H 0.3811 0.2084 0.2092 0.105 Uiso 0.5 1 calc R . . B 2
 C15A C 0.4010(12) 0.5762(3) 0.9175(11) 0.112(4) Uani 0.5 1 d D U . D 2
 C16A C 0.3805(8) 0.6014(3) 0.8638(7) 0.118(4) Uani 0.5 1 d D U . D 2
 C17A C 0.3445(8) 0.5938(2) 0.8019(8) 0.121(4) Uani 0.5 1 d G U . D 2
 H17A H 0.3320 0.5725 0.7936 0.145 Uiso 0.5 1 calc R . . D 2
 C18A C 0.3268(8) 0.6173(3) 0.7520(7) 0.125(4) Uani 0.5 1 d G U . D 2
 H18A H 0.3022 0.6121 0.7097 0.150 Uiso 0.5 1 calc R . . D 2
 C19A C 0.3450(8) 0.6484(3) 0.7641(7) 0.122(4) Uani 0.5 1 d DG U . D 2
 C20A C 0.3810(8) 0.6560(2) 0.8261(8) 0.122(4) Uani 0.5 1 d G U . D 2
 H20A H 0.3935 0.6772 0.8343 0.146 Uiso 0.5 1 calc R . . D 2
 C21A C 0.3988(7) 0.6325(3) 0.8759(7) 0.122(4) Uani 0.5 1 d G U . D 2
 H21A H 0.4234 0.6377 0.9183 0.147 Uiso 0.5 1 calc R . . D 2
 C22A C 0.3201(8) 0.6747(3) 0.7163(7) 0.118(4) Uani 0.5 1 d D U . D 2
 C23A C 0.2758(8) 0.6675(2) 0.6624(8) 0.112(4) Uani 0.5 1 d G U . D 2
 H23A H 0.2622 0.6463 0.6559 0.134 Uiso 0.5 1 calc R . . D 2
 C24A C 0.2513(7) 0.6914(3) 0.6178(7) 0.110(4) Uani 0.5 1 d G U . D 2
 H24A H 0.2210 0.6865 0.5809 0.132 Uiso 0.5 1 d R . . D 2
 C25A C 0.2711(8) 0.7224(3) 0.6273(7) 0.117(4) Uani 0.5 1 d DG U . D 2
 C26A C 0.3155(8) 0.7295(2) 0.6812(8) 0.124(4) Uani 0.5 1 d G U . D 2
 H26A H 0.3290 0.7507 0.6877 0.149 Uiso 0.5 1 d R . . D 2
 C27A C 0.3400(7) 0.7057(3) 0.7257(7) 0.127(4) Uani 0.5 1 d G U . D 2
 H27A H 0.3703 0.7106 0.7626 0.153 Uiso 0.5 1 calc R . . D 2

loop_
  _atom_site_aniso_label
  _atom_site_aniso_U_11
  _atom_site_aniso_U_22
  _atom_site_aniso_U_33
  _atom_site_aniso_U_23
  _atom_site_aniso_U_13
  _atom_site_aniso_U_12
 Zr1 0.0771(7) 0.0212(5) 0.0357(6) 0.000 -0.0175(4) 0.000
 Zr2 0.0658(8) 0.0133(6) 0.0218(6) 0.000 0.000 0.000
 Zr3 0.0933(15) 0.0661(15) 0.0490(12) 0.0022(10) 0.000 0.000
 Zr4 0.0907(17) 0.0760(18) 0.0703(16) 0.000 -0.0269(13) 0.000
 Zr5 0.0925(16) 0.0697(16) 0.0624(13) 0.000 0.0201(11) 0.000
 O1 0.126(5) 0.030(3) 0.081(4) 0.011(3) -0.057(4) 0.004(3)
 O2 0.092(4) 0.026(2) 0.042(3) 0.002(2) -0.008(2) 0.008(2)
 O3 0.136(9) 0.097(8) 0.085(8) 0.003(7) -0.026(7) 0.035(7)
 O4 0.144(10) 0.097(8) 0.119(9) -0.004(8) -0.039(8) 0.040(8)
 O5 0.131(6) 0.052(4) 0.040(3) 0.000 0.000 -0.033(4)
 O6 0.068(4) 0.072(6) 0.120(7) -0.075(6) 0.000 0.000
 O7 0.064(4) 0.052(5) 0.127(7) 0.000 -0.025(4) 0.000
 O8 0.143(6) 0.071(5) 0.021(3) 0.000 -0.028(3) 0.000
 O9 0.152(9) 0.063(8) 0.089(6) 0.006(5) 0.005(6) -0.038(7)
 O10 0.093(12) 0.15(2) 0.089(7) 0.000 -0.031(8) 0.000
 O11 0.084(7) 0.21(3) 0.163(19) 0.000 -0.014(10) 0.000
 O12 0.095(8) 0.17(2) 0.124(14) 0.000 0.039(8) 0.000
 O13 0.141(11) 0.138(12) 0.095(6) 0.000 0.035(8) 0.000
 O14 0.096(7) 0.057(9) 0.119(10) -0.022(8) 0.000 0.000
 C1 0.077(4) 0.032(3) 0.054(4) 0.015(3) -0.023(4) 0.002(3)
 C2 0.089(5) 0.041(4) 0.057(4) 0.019(3) -0.014(4) 0.014(3)
 C3 0.104(6) 0.058(5) 0.074(5) 0.013(4) -0.020(4) 0.005(4)
 C4 0.119(6) 0.058(5) 0.089(6) 0.028(5) -0.020(5) 0.006(5)
 C5 0.112(6) 0.048(4) 0.053(4) 0.005(3) -0.013(4) 0.021(4)
 C6 0.147(7) 0.073(6) 0.099(6) 0.021(5) -0.048(6) 0.010(5)
 C7 0.150(7) 0.055(5) 0.092(6) 0.019(5) -0.046(6) 0.001(5)
 C8 0.118(4) 0.061(4) 0.064(4) 0.015(3) -0.010(3) 0.021(3)
 C9 0.117(5) 0.069(5) 0.075(5) 0.017(4) -0.007(5) 0.020(5)
 C10 0.118(5) 0.070(5) 0.067(5) 0.012(4) -0.007(4) 0.025(4)
 C11 0.126(4) 0.052(3) 0.047(3) 0.002(3) -0.010(3) 0.026(3)
 C12 0.118(5) 0.066(5) 0.066(5) 0.008(4) -0.005(5) 0.012(5)
 C13 0.115(5) 0.069(5) 0.076(5) 0.012(4) -0.009(5) 0.014(4)
 C14 0.117(7) 0.046(5) 0.051(5) 0.000 0.000 0.028(5)
 C15 0.140(9) 0.099(7) 0.098(7) -0.001(7) -0.031(6) 0.038(7)
 C16 0.142(9) 0.105(7) 0.098(7) 0.005(7) -0.030(7) 0.033(7)
 C17 0.133(9) 0.115(8) 0.104(9) 0.008(7) -0.029(7) 0.036(8)
 C18 0.138(9) 0.123(8) 0.095(8) 0.009(8) -0.025(7) 0.038(8)
 C19 0.145(8) 0.119(8) 0.089(7) 0.013(7) -0.014(6) 0.041(7)
 C20 0.146(9) 0.115(8) 0.097(9) 0.014(8) -0.018(7) 0.032(8)
 C21 0.144(9) 0.109(8) 0.096(8) 0.009(8) -0.022(7) 0.027(8)
 C22 0.149(8) 0.130(8) 0.075(7) 0.011(6) -0.002(6) 0.054(7)
 C23 0.148(9) 0.139(10) 0.068(8) 0.009(7) 0.002(7) 0.063(8)
 C24 0.153(9) 0.140(10) 0.071(8) 0.006(7) 0.009(7) 0.068(8)
 C25 0.155(9) 0.139(9) 0.070(7) 0.003(6) 0.011(6) 0.069(8)
 C26 0.153(9) 0.128(9) 0.061(7) 0.010(7) 0.005(7) 0.070(8)
 C27 0.158(9) 0.126(9) 0.071(8) 0.014(7) 0.002(7) 0.060(8)
 C28 0.157(11) 0.142(11) 0.063(8) 0.000 0.000 0.074(9)
 C29 0.169(15) 0.122(14) 0.063(9) 0.000 0.000 0.059(13)
 O3A 0.163(9) 0.074(7) 0.079(8) -0.013(6) -0.038(6) 0.035(7)
 O4A 0.156(12) 0.080(7) 0.101(10) -0.010(8) -0.043(9) 0.022(9)
 O14A 0.101(9) 0.034(7) 0.095(8) -0.003(7) 0.000 0.000
 C9A 0.123(6) 0.061(5) 0.063(5) 0.018(5) -0.017(5) 0.026(5)
 C10A 0.126(6) 0.061(5) 0.068(5) 0.017(5) -0.017(5) 0.027(5)
 C12A 0.129(6) 0.063(5) 0.073(5) 0.010(5) -0.017(5) 0.018(5)
 C13A 0.126(6) 0.065(5) 0.071(5) 0.013(5) -0.013(5) 0.014(5)
 C15A 0.166(9) 0.083(6) 0.086(7) -0.020(6) -0.044(7) 0.042(7)
 C16A 0.177(9) 0.087(6) 0.090(7) -0.016(6) -0.045(7) 0.053(7)
 C17A 0.177(10) 0.092(7) 0.093(8) -0.016(7) -0.045(8) 0.054(8)
 C18A 0.183(10) 0.097(7) 0.095(8) -0.014(7) -0.043(8) 0.054(8)
 C19A 0.185(9) 0.095(6) 0.086(7) -0.009(6) -0.035(7) 0.057(7)
 C20A 0.185(10) 0.093(7) 0.087(8) -0.005(7) -0.040(7) 0.054(8)
 C21A 0.185(10) 0.092(7) 0.089(8) -0.002(7) -0.048(8) 0.044(8)
 C22A 0.185(9) 0.100(7) 0.070(7) -0.005(6) -0.028(7) 0.051(8)
 C23A 0.169(10) 0.103(8) 0.063(7) 0.006(7) -0.017(7) 0.049(8)
 C24A 0.165(10) 0.105(8) 0.061(7) 0.007(7) -0.012(7) 0.049(9)
 C25A 0.174(10) 0.108(8) 0.068(7) 0.005(7) -0.010(7) 0.050(9)
 C26A 0.193(11) 0.104(8) 0.077(8) 0.002(7) -0.025(8) 0.050(9)
 C27A 0.200(11) 0.102(7) 0.080(8) 0.002(7) -0.033(8) 0.047(8)

_geom_special_details
;
 All esds (except the esd in the dihedral angle between two l.s. planes)
 are estimated using the full covariance matrix.  The cell esds are taken
 into account individually in the estimation of esds in distances, angles
 and torsion angles; correlations between esds in cell parameters are only
 used when they are defined by crystal symmetry.  An approximate (isotropic)
 treatment of cell esds is used for estimating esds involving l.s. planes.
;
loop_
  _geom_bond_atom_site_label_1
  _geom_bond_atom_site_label_2
  _geom_bond_distance
  _geom_bond_site_symmetry_2
  _geom_bond_publ_flag
 Zr1 Zr1 3.5444(15) 10_556 ?
 Zr1 Zr1 3.5252(18) 2_655 ?
 Zr1 Zr2 3.5022(8) 9_656 ?
 Zr1 Zr2 3.5022(8) . ?
 Zr1 O1 2.268(5) 12 ?
 Zr1 O1 2.268(5) . ?
 Zr1 O5 2.133(5) 3_556 ?
 Zr1 O5 2.133(5) . ?
 Zr1 O6 2.131(5) . ?
 Zr1 O6 2.131(5) 2_655 ?
 Zr1 O7 2.176(8) . ?
 Zr1 O8 2.207(7) . ?
 Zr2 Zr1 3.5022(8) 2_655 ?
 Zr2 Zr1 3.5022(8) 9_656 ?
 Zr2 Zr1 3.5022(8) 10_556 ?
 Zr2 O2 2.193(5) . ?
 Zr2 O2 2.193(5) 11_655 ?
 Zr2 O2 2.193(5) 10_556 ?
 Zr2 O2 2.193(5) 4_656 ?
 Zr2 O5 2.170(8) 11_655 ?
 Zr2 O5 2.170(8) . ?
 Zr2 O6 2.182(7) 10_556 ?
 Zr2 O6 2.182(7) . ?
 Zr3 Zr3 1.595(5) 10 ?
 Zr3 Zr5 3.035(2) 10 ?
 Zr3 Zr5 3.495(2) . ?
 Zr3 Zr5 3.035(2) 9_575 ?
 Zr3 Zr5 3.495(2) 2_575 ?
 Zr3 O3 2.130(8) . ?
 Zr3 O3 2.130(8) 11 ?
 Zr3 O9 2.186(11) 11 ?
 Zr3 O9 2.722(12) 4 ?
 Zr3 O9 2.186(11) . ?
 Zr3 O9 2.722(12) 10 ?
 Zr3 O14 2.141(12) . ?
 Zr4 Zr4 3.499(5) 2_575 ?
 Zr4 Zr5 1.640(4) 10 ?
 Zr4 O4 2.164(8) . ?
 Zr4 O4 2.164(8) 12_575 ?
 Zr4 O9 2.149(12) . ?
 Zr4 O9 2.148(12) 12_575 ?
 Zr4 O10 2.160(13) . ?
 Zr4 O11 2.221(14) . ?
 Zr4 O13 0.635(16) 10 ?
 Zr4 O14 2.159(9) . ?
 Zr4 O14 2.159(9) 2_575 ?
 Zr5 Zr3 3.035(2) 10 ?
 Zr5 Zr4 1.640(4) 10 ?
 Zr5 Zr5 1.885(5) 10 ?
 Zr5 O9 2.155(12) 12_575 ?
 Zr5 O9 1.240(12) 3_575 ?
 Zr5 O9 2.155(12) . ?
 Zr5 O9 1.240(12) 10 ?
 Zr5 O11 2.699(16) 10 ?
 Zr5 O12 2.223(14) . ?
 Zr5 O13 2.247(15) . ?
 Zr5 O14 2.727(12) 9_575 ?
 Zr5 O14 2.727(12) 10 ?
 O1 C1 1.261(9) . ?
 O2 C1 1.244(8) . ?
 O3 C15 1.299(9) . ?
 O4 C15 1.302(9) . ?
 O5 Zr1 2.133(5) 10_556 ?
 O6 Zr1 2.131(5) 2_655 ?
 O9 Zr3 2.722(12) 10 ?
 O9 Zr5 1.240(12) 10 ?
 O9 O9 1.65(2) 10 ?
 O10 O13 1.59(2) 10 ?
 O11 Zr5 2.699(16) 10 ?
 O11 O12 1.82(3) 10 ?
 O12 O11 1.82(3) 10 ?
 O12 O12 1.40(3) 10 ?
 O13 Zr4 0.635(16) 10 ?
 O13 O10 1.59(2) 10 ?
 O14 Zr4 2.159(9) 2_575 ?
 O14 Zr5 2.727(12) 10 ?
 O14 Zr5 2.727(12) 9_575 ?
 C1 C2 1.504(7) . ?
 C2 C3 1.3900 . ?
 C2 C7 1.3900 . ?
 C3 C4 1.3900 . ?
 C4 C5 1.3900 . ?
 C5 C6 1.3900 . ?
 C5 C8 1.518(5) . ?
 C6 C7 1.3900 . ?
 C8 C9 1.3900 . ?
 C8 C13 1.3900 . ?
 C8 C9A 1.393(7) . ?
 C8 C13A 1.389(8) . ?
 C9 C10 1.3900 . ?
 C10 C11 1.3900 . ?
 C11 C12 1.3900 . ?
 C11 C14 1.507(7) . ?
 C11 C10A 1.397(8) . ?
 C11 C12A 1.382(8) . ?
 C12 C13 1.3900 . ?
 C14 C11 1.507(9) 6 ?
 C14 C14 1.33(2) 13 ?
 C15 C16 1.493(9) . ?
 C16 C17 1.3900 . ?
 C16 C21 1.3900 . ?
 C17 C18 1.3900 . ?
 C18 C19 1.3900 . ?
 C19 C20 1.3900 . ?
 C19 C22 1.491(8) . ?
 C20 C21 1.3900 . ?
 C22 C23 1.3900 . ?
 C22 C27 1.3900 . ?
 C23 C24 1.3900 . ?
 C24 C25 1.3900 . ?
 C25 C25 1.49(3) 10_556 ?
 C25 C26 1.3900 . ?
 C26 C26 1.50(3) 10_556 ?
 C26 C27 1.3900 . ?
 C28 C29 1.424(9) 13_566 ?
 C28 C29 1.424(9) . ?
 O3A O3A 1.05(2) 10_557 ?
 O3A C15A 1.303(9) . ?
 O4A C15A 1.294(9) . ?
 O14A O14A 1.81(3) 10 ?
 C9A C10A 1.392(8) . ?
 C12A C13A 1.390(8) . ?
 C15A C16A 1.500(9) . ?
 C16A C17A 1.3900 . ?
 C16A C21A 1.3900 . ?
 C17A C18A 1.3900 . ?
 C18A C19A 1.3900 . ?
 C19A C20A 1.3900 . ?
 C19A C22A 1.503(8) . ?
 C20A C21A 1.3900 . ?
 C22A C23A 1.3900 . ?
 C22A C27A 1.3900 . ?
 C23A C24A 1.3900 . ?
 C24A C25A 1.3900 . ?
 C25A C26A 1.3900 . ?
 C26A C27A 1.3900 . ?

loop_
  _geom_angle_atom_site_label_1
  _geom_angle_atom_site_label_2
  _geom_angle_atom_site_label_3
  _geom_angle
  _geom_angle_site_symmetry_1
  _geom_angle_site_symmetry_3
  _geom_angle_publ_flag
 Zr1 Zr1 Zr1 90.0 2_655 10_556 ?
 Zr2 Zr1 Zr1 59.782(15) 9_656 2_655 ?
 Zr2 Zr1 Zr1 59.601(14) . 10_556 ?
 Zr2 Zr1 Zr1 59.782(15) . 2_655 ?
 Zr2 Zr1 Zr1 59.600(14) 9_656 10_556 ?
 Zr2 Zr1 Zr2 88.93(3) 9_656 . ?
 O1 Zr1 Zr1 109.30(16) 12 10_556 ?
 O1 Zr1 Zr1 106.97(18) 12 2_655 ?
 O1 Zr1 Zr1 106.97(18) . 2_655 ?
 O1 Zr1 Zr1 109.30(16) . 10_556 ?
 O1 Zr1 Zr2 160.53(14) 12 . ?
 O1 Zr1 Zr2 160.53(14) . 9_656 ?
 O1 Zr1 Zr2 71.67(13) . . ?
 O1 Zr1 Zr2 71.67(13) 12 9_656 ?
 O1 Zr1 O1 127.7(3) 12 . ?
 O5 Zr1 Zr1 33.82(19) . 10_556 ?
 O5 Zr1 Zr1 33.82(19) 3_556 10_556 ?
 O5 Zr1 Zr1 90.0(2) . 2_655 ?
 O5 Zr1 Zr1 90.0(2) 3_556 2_655 ?
 O5 Zr1 Zr2 35.9(2) . . ?
 O5 Zr1 Zr2 88.2(2) . 9_656 ?
 O5 Zr1 Zr2 88.2(2) 3_556 . ?
 O5 Zr1 Zr2 35.9(2) 3_556 9_656 ?
 O5 Zr1 O1 140.7(3) 3_556 . ?
 O5 Zr1 O1 140.7(3) . 12 ?
 O5 Zr1 O1 77.0(3) . . ?
 O5 Zr1 O1 77.0(3) 3_556 12 ?
 O5 Zr1 O5 67.6(4) . 3_556 ?
 O5 Zr1 O7 89.2(3) 3_556 . ?
 O5 Zr1 O7 89.2(3) . . ?
 O5 Zr1 O8 146.04(18) 3_556 . ?
 O5 Zr1 O8 146.04(18) . . ?
 O6 Zr1 Zr1 34.2(2) . 2_655 ?
 O6 Zr1 Zr1 34.2(2) 2_655 2_655 ?
 O6 Zr1 Zr1 90.3(3) . 10_556 ?
 O6 Zr1 Zr1 90.3(3) 2_655 10_556 ?
 O6 Zr1 Zr2 88.9(3) 2_655 . ?
 O6 Zr1 Zr2 36.2(2) . . ?
 O6 Zr1 Zr2 88.9(3) . 9_656 ?
 O6 Zr1 Zr2 36.2(2) 2_655 9_656 ?
 O6 Zr1 O1 74.6(3) 2_655 12 ?
 O6 Zr1 O1 138.1(3) 2_655 . ?
 O6 Zr1 O1 74.6(3) . . ?
 O6 Zr1 O1 138.1(3) . 12 ?
 O6 Zr1 O5 72.1(3) . . ?
 O6 Zr1 O5 108.5(4) . 3_556 ?
 O6 Zr1 O5 72.1(3) 2_655 3_556 ?
 O6 Zr1 O5 108.5(4) 2_655 . ?
 O6 Zr1 O6 68.4(4) . 2_655 ?
 O6 Zr1 O7 145.8(2) . . ?
 O6 Zr1 O7 145.8(2) 2_655 . ?
 O6 Zr1 O8 86.9(3) 2_655 . ?
 O6 Zr1 O8 86.9(3) . . ?
 O7 Zr1 Zr1 89.0(3) . 10_556 ?
 O7 Zr1 Zr1 179.0(3) . 2_655 ?
 O7 Zr1 Zr2 119.64(16) . . ?
 O7 Zr1 Zr2 119.64(16) . 9_656 ?
 O7 Zr1 O1 73.4(2) . 12 ?
 O7 Zr1 O1 73.4(2) . . ?
 O7 Zr1 O8 94.3(4) . . ?
 O8 Zr1 Zr1 176.7(2) . 10_556 ?
 O8 Zr1 Zr1 86.7(2) . 2_655 ?
 O8 Zr1 Zr2 118.44(15) . 9_656 ?
 O8 Zr1 Zr2 118.44(15) . . ?
 O8 Zr1 O1 71.75(19) . 12 ?
 O8 Zr1 O1 71.75(19) . . ?
 Zr1 Zr2 Zr1 60.80(3) 10_556 . ?
 Zr1 Zr2 Zr1 91.07(3) 9_656 . ?
 Zr1 Zr2 Zr1 60.80(3) 2_655 9_656 ?
 Zr1 Zr2 Zr1 60.43(3) 2_655 . ?
 Zr1 Zr2 Zr1 60.43(3) 10_556 9_656 ?
 Zr1 Zr2 Zr1 91.07(3) 10_556 2_655 ?
 O2 Zr2 Zr1 166.57(13) 10_556 2_655 ?
 O2 Zr2 Zr1 111.27(14) . 10_556 ?
 O2 Zr2 Zr1 75.50(13) . . ?
 O2 Zr2 Zr1 111.08(13) . 2_655 ?
 O2 Zr2 Zr1 111.08(13) 11_655 . ?
 O2 Zr2 Zr1 166.57(13) 11_655 10_556 ?
 O2 Zr2 Zr1 111.08(13) 4_656 10_556 ?
 O2 Zr2 Zr1 75.50(12) 4_656 9_656 ?
 O2 Zr2 Zr1 166.57(13) 4_656 . ?
 O2 Zr2 Zr1 111.27(14) 11_655 9_656 ?
 O2 Zr2 Zr1 111.27(14) 10_556 . ?
 O2 Zr2 Zr1 111.08(13) 10_556 9_656 ?
 O2 Zr2 Zr1 111.27(14) 4_656 2_655 ?
 O2 Zr2 Zr1 166.57(13) . 9_656 ?
 O2 Zr2 Zr1 75.50(13) 10_556 10_556 ?
 O2 Zr2 Zr1 75.50(12) 11_655 2_655 ?
 O2 Zr2 O2 117.9(3) 4_656 . ?
 O2 Zr2 O2 74.6(3) 4_656 10_556 ?
 O2 Zr2 O2 74.6(3) 4_656 11_655 ?
 O2 Zr2 O2 74.6(3) 11_655 . ?
 O2 Zr2 O2 117.9(3) 11_655 10_556 ?
 O2 Zr2 O2 74.6(3) 10_556 . ?
 O5 Zr2 Zr1 90.0(2) . 2_655 ?
 O5 Zr2 Zr1 90.0(2) . 9_656 ?
 O5 Zr2 Zr1 35.17(12) . . ?
 O5 Zr2 Zr1 90.0(2) 11_655 10_556 ?
 O5 Zr2 Zr1 90.0(2) 11_655 . ?
 O5 Zr2 Zr1 35.17(12) . 10_556 ?
 O5 Zr2 Zr1 35.18(12) 11_655 2_655 ?
 O5 Zr2 Zr1 35.18(12) 11_655 9_656 ?
 O5 Zr2 O2 142.46(13) 11_655 10_556 ?
 O5 Zr2 O2 79.0(2) 11_655 4_656 ?
 O5 Zr2 O2 79.0(2) 11_655 11_655 ?
 O5 Zr2 O2 79.0(2) . 10_556 ?
 O5 Zr2 O2 142.46(13) . 4_656 ?
 O5 Zr2 O2 142.46(13) . 11_655 ?
 O5 Zr2 O2 79.0(2) . . ?
 O5 Zr2 O2 142.47(13) 11_655 . ?
 O5 Zr2 O5 108.6(5) 11_655 . ?
 O5 Zr2 O6 70.39(18) . 10_556 ?
 O5 Zr2 O6 70.40(18) 11_655 . ?
 O5 Zr2 O6 70.39(18) . . ?
 O5 Zr2 O6 70.40(18) 11_655 10_556 ?
 O6 Zr2 Zr1 35.23(14) . 2_655 ?
 O6 Zr2 Zr1 35.23(14) 10_556 9_656 ?
 O6 Zr2 Zr1 35.23(14) 10_556 10_556 ?
 O6 Zr2 Zr1 90.6(3) 10_556 2_655 ?
 O6 Zr2 Zr1 90.6(3) . 10_556 ?
 O6 Zr2 Zr1 90.6(3) . 9_656 ?
 O6 Zr2 Zr1 35.23(14) . . ?
 O6 Zr2 Zr1 90.6(3) 10_556 . ?
 O6 Zr2 O2 142.38(15) . 10_556 ?
 O6 Zr2 O2 78.5(3) 10_556 4_656 ?
 O6 Zr2 O2 78.5(3) 10_556 10_556 ?
 O6 Zr2 O2 78.5(3) . 11_655 ?
 O6 Zr2 O2 142.38(15) 10_556 11_655 ?
 O6 Zr2 O2 78.5(3) . . ?
 O6 Zr2 O2 142.38(15) 10_556 . ?
 O6 Zr2 O2 142.38(15) . 4_656 ?
 O6 Zr2 O6 109.8(6) . 10_556 ?
 Zr3 Zr3 Zr5 60.15(5) 10 2_575 ?
 Zr3 Zr3 Zr5 92.74(8) 10 9_575 ?
 Zr3 Zr3 Zr5 60.15(5) 10 . ?
 Zr3 Zr3 Zr5 92.74(8) 10 10 ?
 Zr3 Zr3 O3 129.3(4) 10 . ?
 Zr3 Zr3 O3 129.3(4) 10 11 ?
 Zr3 Zr3 O9 53.4(2) 10 10 ?
 Zr3 Zr3 O9 90.7(3) 10 . ?
 Zr3 Zr3 O9 90.7(3) 10 11 ?
 Zr3 Zr3 O9 53.4(2) 10 4 ?
 Zr3 Zr3 O14 146.2(4) 10 . ?
 Zr5 Zr3 Zr5 32.59(10) 10 . ?
 Zr5 Zr3 Zr5 75.75(8) 10 2_575 ?
 Zr5 Zr3 Zr5 71.75(9) 10 9_575 ?
 Zr5 Zr3 Zr5 32.59(10) 9_575 2_575 ?
 Zr5 Zr3 Zr5 61.17(8) 2_575 . ?
 Zr5 Zr3 Zr5 75.75(8) 9_575 . ?
 O3 Zr3 Zr5 111.4(5) 11 2_575 ?
 O3 Zr3 Zr5 136.1(4) 11 10 ?
 O3 Zr3 Zr5 111.4(5) . . ?
 O3 Zr3 Zr5 165.2(4) . 2_575 ?
 O3 Zr3 Zr5 165.2(4) 11 . ?
 O3 Zr3 Zr5 91.5(5) 11 9_575 ?
 O3 Zr3 Zr5 136.1(4) . 9_575 ?
 O3 Zr3 Zr5 91.5(5) . 10 ?
 O3 Zr3 O3 72.6(10) 11 . ?
 O3 Zr3 O9 101.9(6) . 10 ?
 O3 Zr3 O9 174.4(6) . 4 ?
 O3 Zr3 O9 139.6(6) 11 . ?
 O3 Zr3 O9 101.9(6) 11 4 ?
 O3 Zr3 O9 77.3(6) . . ?
 O3 Zr3 O9 174.4(6) 11 10 ?
 O3 Zr3 O9 77.3(6) 11 11 ?
 O3 Zr3 O9 139.6(6) . 11 ?
 O3 Zr3 O14 75.6(5) . . ?
 O3 Zr3 O14 75.6(5) 11 . ?
 O9 Zr3 Zr5 20.2(4) 11 9_575 ?
 O9 Zr3 Zr5 20.2(4) . 10 ?
 O9 Zr3 Zr5 91.9(4) 11 10 ?
 O9 Zr3 Zr5 43.5(2) 4 9_575 ?
 O9 Zr3 Zr5 43.5(2) 10 10 ?
 O9 Zr3 Zr5 18.1(3) 10 . ?
 O9 Zr3 Zr5 74.2(3) 10 2_575 ?
 O9 Zr3 Zr5 36.1(3) . . ?
 O9 Zr3 Zr5 91.9(4) . 9_575 ?
 O9 Zr3 Zr5 92.1(4) 11 . ?
 O9 Zr3 Zr5 74.2(3) 4 . ?
 O9 Zr3 Zr5 92.1(4) . 2_575 ?
 O9 Zr3 Zr5 93.2(3) 10 9_575 ?
 O9 Zr3 Zr5 36.1(3) 11 2_575 ?
 O9 Zr3 Zr5 93.2(3) 4 10 ?
 O9 Zr3 Zr5 18.1(3) 4 2_575 ?
 O9 Zr3 O9 83.5(6) 4 10 ?
 O9 Zr3 O9 108.0(6) 11 10 ?
 O9 Zr3 O9 37.3(5) . 10 ?
 O9 Zr3 O9 112.1(8) . 11 ?
 O9 Zr3 O9 108.0(6) . 4 ?
 O9 Zr3 O9 37.3(5) 11 4 ?
 O14 Zr3 Zr5 91.3(4) . . ?
 O14 Zr3 Zr5 60.7(3) . 9_575 ?
 O14 Zr3 Zr5 60.7(3) . 10 ?
 O14 Zr3 Zr5 91.3(4) . 2_575 ?
 O14 Zr3 O9 71.3(4) . . ?
 O14 Zr3 O9 104.2(4) . 10 ?
 O14 Zr3 O9 104.2(4) . 4 ?
 O14 Zr3 O9 71.3(4) . 11 ?
 Zr4 Zr4 Zr3 60.04(5) 2_575 . ?
 Zr5 Zr4 Zr3 59.97(8) 10 . ?
 Zr5 Zr4 Zr4 91.01(13) 10 2_575 ?
 Zr5 Zr4 O4 108.1(5) 10 12_575 ?
 Zr5 Zr4 O4 108.1(5) 10 . ?
 Zr5 Zr4 O9 35.1(3) 10 12_575 ?
 Zr5 Zr4 O9 35.1(3) 10 . ?
 Zr5 Zr4 O10 178.4(5) 10 . ?
 Zr5 Zr4 O11 87.4(4) 10 . ?
 Zr5 Zr4 O14 90.7(4) 10 2_575 ?
 Zr5 Zr4 O14 90.7(4) 10 . ?
 O4 Zr4 Zr3 72.1(4) . . ?
 O4 Zr4 Zr3 161.1(4) 12_575 . ?
 O4 Zr4 Zr4 108.5(5) . 2_575 ?
 O4 Zr4 Zr4 108.5(5) 12_575 2_575 ?
 O4 Zr4 O4 126.8(8) 12_575 . ?
 O4 Zr4 O11 72.1(5) . . ?
 O4 Zr4 O11 72.1(5) 12_575 . ?
 O9 Zr4 Zr3 36.4(3) . . ?
 O9 Zr4 Zr3 90.0(4) 12_575 . ?
 O9 Zr4 Zr4 91.7(4) . 2_575 ?
 O9 Zr4 Zr4 91.7(4) 12_575 2_575 ?
 O9 Zr4 O4 139.7(6) . 12_575 ?
 O9 Zr4 O4 74.7(6) 12_575 12_575 ?
 O9 Zr4 O4 139.7(6) 12_575 . ?
 O9 Zr4 O4 74.7(6) . . ?
 O9 Zr4 O9 70.1(6) 12_575 . ?
 O9 Zr4 O10 144.9(3) . . ?
 O9 Zr4 O10 144.9(3) 12_575 . ?
 O9 Zr4 O11 87.0(5) 12_575 . ?
 O9 Zr4 O11 87.0(5) . . ?
 O9 Zr4 O14 111.0(5) 12_575 . ?
 O9 Zr4 O14 71.7(4) 12_575 2_575 ?
 O9 Zr4 O14 71.7(4) . . ?
 O9 Zr4 O14 111.0(5) . 2_575 ?
 O10 Zr4 Zr3 119.1(3) . . ?
 O10 Zr4 Zr4 87.3(4) . 2_575 ?
 O10 Zr4 O4 72.5(5) . 12_575 ?
 O10 Zr4 O4 72.5(5) . . ?
 O10 Zr4 O11 94.3(5) . . ?
 O11 Zr4 Zr3 119.0(2) . . ?
 O11 Zr4 Zr4 178.4(4) . 2_575 ?
 O13 Zr4 Zr3 130.0(8) 10 . ?
 O13 Zr4 Zr4 108.8(18) 10 2_575 ?
 O13 Zr4 Zr5 160.1(19) 10 10 ?
 O13 Zr4 O4 66.3(6) 10 . ?
 O13 Zr4 O4 66.3(6) 10 12_575 ?
 O13 Zr4 O9 139.9(9) 10 12_575 ?
 O13 Zr4 O9 139.9(9) 10 . ?
 O13 Zr4 O10 21.5(19) 10 . ?
 O13 Zr4 O11 73(2) 10 . ?
 O13 Zr4 O14 105.3(15) 10 2_575 ?
 O13 Zr4 O14 105.3(15) 10 . ?
 O14 Zr4 Zr3 35.3(3) . . ?
 O14 Zr4 Zr3 90.3(4) 2_575 . ?
 O14 Zr4 Zr4 35.9(3) . 2_575 ?
 O14 Zr4 Zr4 35.9(3) 2_575 2_575 ?
 O14 Zr4 O4 74.5(5) 2_575 12_575 ?
 O14 Zr4 O4 74.5(5) . . ?
 O14 Zr4 O4 141.4(6) 2_575 . ?
 O14 Zr4 O4 141.4(6) . 12_575 ?
 O14 Zr4 O10 88.0(5) . . ?
 O14 Zr4 O10 88.0(5) 2_575 . ?
 O14 Zr4 O11 144.1(3) . . ?
 O14 Zr4 O11 144.1(3) 2_575 . ?
 O14 Zr4 O14 71.7(7) . 2_575 ?
 Zr4 Zr5 Zr3 92.14(11) 10 10 ?
 Zr4 Zr5 Zr5 178.98(13) 10 10 ?
 Zr4 Zr5 O9 145.1(3) 10 . ?
 Zr4 Zr5 O9 145.1(3) 10 12_575 ?
 Zr4 Zr5 O11 55.3(3) 10 10 ?
 Zr4 Zr5 O12 97.3(4) 10 . ?
 Zr4 Zr5 O13 5.5(6) 10 . ?
 Zr4 Zr5 O14 52.3(3) 10 9_575 ?
 Zr4 Zr5 O14 52.3(3) 10 10 ?
 Zr5 Zr5 Zr3 87.26(8) 10 10 ?
 Zr5 Zr5 O9 34.9(3) 10 . ?
 Zr5 Zr5 O9 34.9(3) 10 12_575 ?
 Zr5 Zr5 O11 125.7(3) 10 10 ?
 Zr5 Zr5 O12 83.7(4) 10 . ?
 Zr5 Zr5 O13 175.5(5) 10 . ?
 Zr5 Zr5 O14 126.8(2) 10 9_575 ?
 Zr5 Zr5 O14 126.8(2) 10 10 ?
 O9 Zr5 Zr3 60.5(3) . 10 ?
 O9 Zr5 Zr3 144.8(7) 3_575 10 ?
 O9 Zr5 Zr3 115.7(4) 12_575 10 ?
 O9 Zr5 Zr3 37.5(6) 10 10 ?
 O9 Zr5 Zr4 95.5(6) 10 10 ?
 O9 Zr5 Zr4 95.5(6) 3_575 10 ?
 O9 Zr5 Zr5 84.5(6) 10 10 ?
 O9 Zr5 Zr5 84.5(6) 3_575 10 ?
 O9 Zr5 O9 119.4(5) 10 12_575 ?
 O9 Zr5 O9 168.6(12) 3_575 10 ?
 O9 Zr5 O9 49.6(8) 10 . ?
 O9 Zr5 O9 49.6(8) 3_575 12_575 ?
 O9 Zr5 O9 119.4(5) 3_575 . ?
 O9 Zr5 O9 69.9(6) 12_575 . ?
 O9 Zr5 O11 91.9(6) 3_575 10 ?
 O9 Zr5 O11 117.8(5) . 10 ?
 O9 Zr5 O11 91.9(6) 10 10 ?
 O9 Zr5 O11 117.8(5) 12_575 10 ?
 O9 Zr5 O12 83.9(5) . . ?
 O9 Zr5 O12 87.8(6) 3_575 . ?
 O9 Zr5 O12 87.8(6) 10 . ?
 O9 Zr5 O12 83.9(5) 12_575 . ?
 O9 Zr5 O13 95.3(6) 3_575 . ?
 O9 Zr5 O13 144.7(3) 12_575 . ?
 O9 Zr5 O13 144.7(3) . . ?
 O9 Zr5 O13 95.3(6) 10 . ?
 O9 Zr5 O14 67.3(7) 3_575 9_575 ?
 O9 Zr5 O14 67.3(7) 10 10 ?
 O9 Zr5 O14 103.7(4) . 10 ?
 O9 Zr5 O14 122.5(7) 10 9_575 ?
 O9 Zr5 O14 140.1(4) 12_575 10 ?
 O9 Zr5 O14 103.7(4) 12_575 9_575 ?
 O9 Zr5 O14 140.1(4) . 9_575 ?
 O9 Zr5 O14 122.5(7) 3_575 10 ?
 O11 Zr5 Zr3 120.24(12) 10 10 ?
 O11 Zr5 O14 100.3(3) 10 9_575 ?
 O11 Zr5 O14 100.3(3) 10 10 ?
 O12 Zr5 Zr3 125.26(7) . 10 ?
 O12 Zr5 O11 42.0(6) . 10 ?
 O12 Zr5 O13 91.8(5) . . ?
 O12 Zr5 O14 135.6(4) . 9_575 ?
 O12 Zr5 O14 135.6(4) . 10 ?
 O13 Zr5 Zr3 95.4(3) . 10 ?
 O13 Zr5 O11 49.8(7) . 10 ?
 O13 Zr5 O14 56.9(5) . 9_575 ?
 O13 Zr5 O14 56.9(5) . 10 ?
 O14 Zr5 Zr3 91.2(3) 9_575 10 ?
 O14 Zr5 Zr3 43.2(3) 10 10 ?
 O14 Zr5 O14 55.3(6) 10 9_575 ?
 C1 O1 Zr1 133.4(5) . . ?
 C1 O2 Zr2 131.2(4) . . ?
 C15 O3 Zr3 133.8(11) . . ?
 C15 O4 Zr4 135.2(11) . . ?
 Zr1 O5 Zr1 112.4(4) . 10_556 ?
 Zr1 O5 Zr2 109.0(3) 10_556 . ?
 Zr1 O5 Zr2 109.0(3) . . ?
 Zr1 O6 Zr1 111.6(4) 2_655 . ?
 Zr1 O6 Zr2 108.6(3) 2_655 . ?
 Zr1 O6 Zr2 108.6(3) . . ?
 Zr3 O9 Zr3 35.9(2) . 10 ?
 Zr4 O9 Zr3 136.5(6) . 10 ?
 Zr4 O9 Zr3 107.8(5) . . ?
 Zr4 O9 Zr5 109.9(5) . . ?
 Zr5 O9 Zr3 122.3(10) 10 . ?
 Zr5 O9 Zr3 76.0(4) . 10 ?
 Zr5 O9 Zr3 119.0(9) 10 10 ?
 Zr5 O9 Zr3 107.2(6) . . ?
 Zr5 O9 Zr4 49.4(5) 10 . ?
 Zr5 O9 Zr5 60.5(5) 10 . ?
 Zr5 O9 O9 95.5(6) 10 10 ?
 O9 O9 Zr3 53.4(2) 10 10 ?
 O9 O9 Zr3 89.3(3) 10 . ?
 O9 O9 Zr4 144.9(3) 10 . ?
 O9 O9 Zr5 34.9(3) 10 . ?
 O13 O10 Zr4 8.4(8) 10 . ?
 Zr4 O11 Zr5 37.4(3) . 10 ?
 O12 O11 Zr4 92.2(8) 10 . ?
 O12 O11 Zr5 54.8(6) 10 10 ?
 O11 O12 Zr5 83.1(6) 10 . ?
 O12 O12 Zr5 96.3(4) 10 . ?
 O12 O12 O11 179.4(6) 10 10 ?
 Zr4 O13 Zr5 14.4(13) 10 . ?
 Zr4 O13 O10 150(3) 10 10 ?
 O10 O13 Zr5 164.4(15) 10 . ?
 Zr3 O14 Zr4 109.1(4) . 2_575 ?
 Zr3 O14 Zr4 109.1(4) . . ?
 Zr3 O14 Zr5 76.1(4) . 10 ?
 Zr3 O14 Zr5 76.1(4) . 9_575 ?
 Zr4 O14 Zr4 108.3(7) 2_575 . ?
 Zr4 O14 Zr5 37.0(2) . 10 ?
 Zr4 O14 Zr5 37.0(2) 2_575 9_575 ?
 Zr4 O14 Zr5 105.0(6) 2_575 10 ?
 Zr4 O14 Zr5 105.0(6) . 9_575 ?
 Zr5 O14 Zr5 81.4(4) 9_575 10 ?
 O1 C1 C2 116.6(6) . . ?
 O2 C1 O1 126.9(6) . . ?
 O2 C1 C2 116.5(6) . . ?
 C3 C2 C1 119.0(4) . . ?
 C3 C2 C7 120.0 . . ?
 C7 C2 C1 121.0(4) . . ?
 C4 C3 C2 120.0 . . ?
 C3 C4 C5 120.0 . . ?
 C4 C5 C8 121.0(5) . . ?
 C6 C5 C4 120.0 . . ?
 C6 C5 C8 118.9(5) . . ?
 C5 C6 C7 120.0 . . ?
 C6 C7 C2 120.0 . . ?
 C9 C8 C5 118.5(6) . . ?
 C9 C8 C13 120.0 . . ?
 C13 C8 C5 121.4(6) . . ?
 C9A C8 C5 120.6(6) . . ?
 C13A C8 C5 119.2(6) . . ?
 C13A C8 C9A 120.1(4) . . ?
 C10 C9 C8 120.0 . . ?
 C9 C10 C11 120.0 . . ?
 C10 C11 C14 119.1(5) . . ?
 C12 C11 C10 120.0 . . ?
 C12 C11 C14 120.9(5) . . ?
 C10A C11 C14 120.6(6) . . ?
 C12A C11 C14 119.3(6) . . ?
 C12A C11 C10A 120.0(4) . . ?
 C11 C12 C13 120.0 . . ?
 C12 C13 C8 120.0 . . ?
 C11 C14 C11 114.5(11) 6 . ?
 C14 C14 C11 122.8(7) 13 6 ?
 C14 C14 C11 122.8(4) 13 . ?
 O3 C15 O4 121.3(14) . . ?
 O3 C15 C16 115.2(11) . . ?
 O4 C15 C16 123.1(12) . . ?
 C17 C16 C15 118.2(12) . . ?
 C17 C16 C21 120.0 . . ?
 C21 C16 C15 121.7(12) . . ?
 C16 C17 C18 120.0 . . ?
 C19 C18 C17 120.0 . . ?
 C18 C19 C20 120.0 . . ?
 C18 C19 C22 116.0(13) . . ?
 C20 C19 C22 123.9(13) . . ?
 C21 C20 C19 120.0 . . ?
 C20 C21 C16 120.0 . . ?
 C23 C22 C19 120.5(13) . . ?
 C23 C22 C27 120.0 . . ?
 C27 C22 C19 119.1(13) . . ?
 C24 C23 C22 120.0 . . ?
 C23 C24 C25 120.0 . . ?
 C24 C25 C25 122.9 . 10_556 ?
 C26 C25 C24 120.0 . . ?
 C26 C25 C25 90.2 . 10_556 ?
 C25 C26 C26 89.8 . 10_556 ?
 C25 C26 C27 120.0 . . ?
 C27 C26 C26 123.1 . 10_556 ?
 C26 C27 C22 120.0 . . ?
 C29 C28 C29 180.0 13_566 . ?
 O3A O3A C15A 137.2(15) 10_557 . ?
 C10A C9A C8 119.9(5) . . ?
 C9A C10A C11 119.8(5) . . ?
 C11 C12A C13A 120.4(5) . . ?
 C8 C13A C12A 119.8(5) . . ?
 O3A C15A C16A 119.2(11) . . ?
 O4A C15A O3A 115.7(12) . . ?
 O4A C15A C16A 124.2(11) . . ?
 C17A C16A C15A 120.7(11) . . ?
 C17A C16A C21A 120.0 . . ?
 C21A C16A C15A 119.3(11) . . ?
 C16A C17A C18A 120.0 . . ?
 C19A C18A C17A 120.0 . . ?
 C18A C19A C22A 120.8(12) . . ?
 C20A C19A C18A 120.0 . . ?
 C20A C19A C22A 118.8(11) . . ?
 C19A C20A C21A 120.0 . . ?
 C20A C21A C16A 120.0 . . ?
 C23A C22A C19A 118.5(12) . . ?
 C23A C22A C27A 120.0 . . ?
 C27A C22A C19A 121.4(12) . . ?
 C22A C23A C24A 120.0 . . ?
 C23A C24A C25A 120.0 . . ?
 C26A C25A C24A 120.0 . . ?
 C25A C26A C27A 120.0 . . ?
 C26A C27A C22A 120.0 . . ?

_shelx_res_file
;
    2_sq.res created by SHELXL-2014/7

TITL 1
CELL 1.54184 21.441859 42.316943 17.926217 90 90 90
ZERR 4 0.00079 0.000981 0.000492 0 0 0
LATT 7
SYMM -X,-Y,+Z
SYMM +X,-Y,-Z
SYMM -X,+Y,-Z
SFAC C O Zr H
UNIT 432 128 24 256
EQIV $1 0.5-X,1.5-Y,1+Z
DFIX 1.39 0.01 C8 C9A C9A C10A C10A C11
DFIX 1.39 0.01 C11 C12A C12A C13A C13A C8
DFIX 2.4 0.01 C8 C10A C9A C11 C10A C12A
DFIX 2.4 0.01 C11 C13A C12A C8 C13A C9A
DFIX 2.8 0.01 C9A C12A C10A C13A
DFIX 1.49 0.01 C15 C16 C19 C22 C25 C28
DFIX 1.49 0.01 C15A C16A C19A C22A C25A C29
DFIX 1.41 0.01 C28 C29
DFIX 1.29 0.01 C15 O3 C15 O4 C15A O3A C15A O4A
DFIX 2.15 Zr3 O9 Zr4 O9 Zr5 O9
DFIX 2.15 Zr3 O14 Zr4 O14
DFIX 2.094 0.01 Zr3 O3
DFIX 2.127 0.01 Zr4 O4
DFIX 2.105 0.01 Zr3_$1 O3A
DFIX 2.138 0.01 Zr5_$1 O4A
DFIX 1.681 0.01 O14 O14A
DFIX 3.2 0.01 O11 O12 O10 O11 O12 O13
DFIX 1.264 0.01 Zr3 O14A
DFIX 2.25 Zr4 O10 Zr4 O11 Zr5 O12 Zr5 O13
FLAT 0.01 C8 C9A C10A C11 C12A C13A
DELU Zr3 > Zr5 O9 > O14 O14A
DELU O3 O4 C15 > C29 C15A > C27A O3A O4A
DELU C8 > C13 C9A > C13A
DELU Zr1 Zr2 O1 O2 O5 > O8
SIMU 0.01 0.02 2 Zr3 > Zr5 O9 > O14 O14A
SIMU 0.01 0.02 2 O3 O4 C15 > C29 C15A > C27A O3A O4A
SIMU 0.01 0.02 2 C8 > C13 C9A > C13A
SIMU 0.01 0.02 2 Zr1 Zr2 O1 O2 O5 > O8
ISOR 0.01 0.02 O13 C1 > C14 O5
ISOR 0.002 0.01 O8

L.S. 20 0 117
PLAN  20
TEMP -100
GRID
ABIN
fmap 2
acta
MERG 2
REM <olex2.extras>
REM <HklSrc "%.\\2_sq.hkl">
REM </olex2.extras>

WGHT    0.200000
FVAR       0.93066
ZR1   3    0.417795    0.000000    0.401140    10.50000    0.07708    0.02121 =
         0.03570    0.00000   -0.01752    0.00000
ZR2   3    0.500000    0.057972    0.500000    10.25000    0.06582    0.01328 =
         0.02178    0.00000    0.00000    0.00000
PART 1
ZR3   3    0.000000    0.941984    0.044485    10.25000    0.09329    0.06607 =
         0.04900    0.00221    0.00000    0.00000
ZR4   3    0.081598    1.000000    0.144023    10.25000    0.09071    0.07601 =
         0.07029    0.00000   -0.02685    0.00000
ZR5   3    0.082952    1.000000   -0.052578    10.25000    0.09250    0.06965 =
         0.06236    0.00000    0.02010    0.00000

PART 0
O1    2    0.386913    0.048113    0.359320    11.00000    0.12625    0.03022 =
         0.08106    0.01091   -0.05660    0.00428
O2    2    0.438011    0.084696    0.425887    11.00000    0.09168    0.02575 =
         0.04235    0.00214   -0.00794    0.00799

PART 1
O3    2    0.058771    0.916867    0.119688    10.50000    0.13598    0.09672 =
         0.08546    0.00278   -0.02563    0.03474
O4    2    0.113562    0.954259    0.182193    10.50000    0.14424    0.09744 =
         0.11927   -0.00387   -0.03916    0.03965

PART 0
O5    2    0.417811    0.028057    0.500000    10.50000    0.13058    0.05176 =
         0.04048    0.00000    0.00000   -0.03340
O6    2    0.500000    0.028312    0.400422    10.50000    0.06841    0.07235 =
         0.11997   -0.07508    0.00000    0.00000
O7    2    0.316323    0.000000    0.403228    10.50000    0.06416    0.05198 =
         0.12701    0.00000   -0.02465    0.00000
O8    2    0.423704    0.000000    0.278229    10.50000    0.14276    0.07084 =
         0.02109    0.00000   -0.02802    0.00000

PART 1
O9    2    0.084569    0.970834    0.045981    10.50000    0.15199    0.06257 =
         0.08940    0.00635    0.00499   -0.03754
O10   2    0.076922    1.000000    0.264370    10.25000    0.09318    0.15154 =
         0.08860    0.00000   -0.03074    0.00000
O11   2    0.185133    1.000000    0.140499    10.25000    0.08380    0.20907 =
         0.16282    0.00000   -0.01364    0.00000
O12   2    0.185988    1.000000   -0.039001    10.25000    0.09523    0.17373 =
         0.12414    0.00000    0.03908    0.00000
O13   2    0.091166    1.000000   -0.177544    10.25000    0.14138    0.13782 =
         0.09523    0.00000    0.03545    0.00000
O14   2    0.000000    0.970121    0.143757    10.25000    0.09560    0.05664 =
         0.11944   -0.02205    0.00000    0.00000

PART 0
C1    1    0.404106    0.075973    0.373469    11.00000    0.07749    0.03227 =
         0.05381    0.01537   -0.02258    0.00178
AFIX  66
C2    1    0.382840    0.101215    0.320197    11.00000    0.08852    0.04104 =
         0.05722    0.01937   -0.01402    0.01356
C3    1    0.406901    0.131560    0.327455    11.00000    0.10445    0.05753 =
         0.07358    0.01263   -0.02044    0.00497
AFIX  43
H3    4    0.435981    0.136139    0.365949    11.00000   -1.20000
AFIX  65
C4    1    0.388415    0.155207    0.278389    11.00000    0.11867    0.05766 =
         0.08924    0.02831   -0.01969    0.00608
AFIX  43
H4    4    0.404860    0.175947    0.283349    11.00000   -1.20000
AFIX  65
C5    1    0.345866    0.148509    0.222066    11.00000    0.11153    0.04768 =
         0.05325    0.00507   -0.01342    0.02056
C6    1    0.321804    0.118164    0.214808    11.00000    0.14662    0.07318 =
         0.09901    0.02123   -0.04785    0.00975
AFIX  43
H6    4    0.292724    0.113586    0.176313    11.00000   -1.20000
AFIX  65
C7    1    0.340290    0.094516    0.263873    11.00000    0.14975    0.05455 =
         0.09207    0.01891   -0.04553    0.00137
AFIX  43
H7    4    0.323845    0.073777    0.258912    11.00000   -1.20000
AFIX  66
C8    1    0.321981    0.174360    0.170736    11.00000    0.11776    0.06076 =
         0.06427    0.01505   -0.00987    0.02090
PART 1
C9    1    0.258434    0.180847    0.170104    10.50000    0.11743    0.06942 =
         0.07480    0.01729   -0.00651    0.02018
AFIX  43
H9    4    0.230775    0.168640    0.199830    10.50000   -1.20000
AFIX  65
C10   1    0.235355    0.205194    0.125979    10.50000    0.11766    0.07048 =
         0.06664    0.01223   -0.00650    0.02469
AFIX  43
H10   4    0.191923    0.209627    0.125547    10.50000   -1.20000
AFIX  65
PART 0
C11   1    0.275823    0.223055    0.082486    11.00000    0.12588    0.05235 =
         0.04736    0.00220   -0.01003    0.02621
PART 1
C12   1    0.339371    0.216569    0.083117    10.50000    0.11779    0.06573 =
         0.06581    0.00847   -0.00469    0.01186
AFIX  43
H12   4    0.367029    0.228776    0.053391    10.50000   -1.20000
AFIX  65
C13   1    0.362451    0.192222    0.127242    10.50000    0.11517    0.06916 =
         0.07611    0.01196   -0.00852    0.01439
AFIX  43
H13   4    0.405883    0.187789    0.127673    10.50000   -1.20000
AFIX   0
PART 0
C14   1    0.250000    0.250000    0.036971    10.50000    0.11720    0.04560 =
         0.05060    0.00000    0.00000    0.02769

PART 1
C15   1    0.093894    0.925292    0.175258    10.50000    0.14014    0.09882 =
         0.09759   -0.00082   -0.03146    0.03831
AFIX  66
C16   1    0.116005    0.898899    0.223808    10.50000    0.14198    0.10508 =
         0.09808    0.00544   -0.02963    0.03269
C17   1    0.166023    0.904559    0.271288    10.50000    0.13322    0.11474 =
         0.10407    0.00802   -0.02899    0.03642
AFIX  43
H17   4    0.186683    0.924414    0.270233    10.50000   -1.20000
AFIX  65
C18   1    0.185815    0.881170    0.320314    10.50000    0.13825    0.12267 =
         0.09502    0.00871   -0.02494    0.03750
AFIX  43
H18   4    0.220000    0.885039    0.352765    10.50000   -1.20000
AFIX  65
C19   1    0.155587    0.852120    0.321859    10.50000    0.14463    0.11933 =
         0.08903    0.01307   -0.01391    0.04123
C20   1    0.105568    0.846458    0.274379    10.50000    0.14571    0.11466 =
         0.09721    0.01422   -0.01773    0.03225
AFIX  43
H20   4    0.084910    0.826603    0.275435    10.50000   -1.20000
AFIX  65
C21   1    0.085777    0.869847    0.225353    10.50000    0.14400    0.10945 =
         0.09586    0.00868   -0.02230    0.02714
AFIX  43
H21   4    0.051591    0.865978    0.192902    10.50000   -1.20000
AFIX  66
C22   1    0.182121    0.828035    0.373576    10.50000    0.14938    0.12973 =
         0.07520    0.01148   -0.00183    0.05407
C23   1    0.245752    0.821758    0.373851    10.50000    0.14817    0.13893 =
         0.06794    0.00887    0.00223    0.06271
AFIX  43
H23   4    0.273280    0.834438    0.345071    10.50000   -1.20000
AFIX  65
C24   1    0.269105    0.796927    0.416235    10.50000    0.15337    0.14044 =
         0.07143    0.00559    0.00920    0.06808
AFIX   3
H24   4    0.312571    0.792649    0.416433    10.50000   -1.20000
AFIX  65
C25   1    0.228828    0.778373    0.458344    10.50000    0.15459    0.13946 =
         0.07028    0.00335    0.01150    0.06938
C26   1    0.165197    0.784651    0.458070    10.50000    0.15259    0.12776 =
         0.06126    0.00981    0.00548    0.07011
AFIX   3
H26   4    0.137665    0.771982    0.486879    10.50000   -1.20000
AFIX  65
C27   1    0.141843    0.809481    0.415686    10.50000    0.15755    0.12640 =
         0.07056    0.01407    0.00242    0.05954
AFIX  43
H27   4    0.098354    0.813771    0.415499    10.50000   -1.20000
AFIX   0

PART 0
PART 3
C28   1    0.250000    0.750000    0.500000    10.25000    0.15737    0.14186 =
         0.06346    0.00000    0.00000    0.07409
C29   1    0.250000    0.750000    0.579432    10.25000    0.16921    0.12195 =
         0.06330    0.00000    0.00000    0.05912

PART 0
PART 2
O3A   2    0.439719    0.583543    0.970785    10.50000    0.16327    0.07417 =
         0.07915   -0.01276   -0.03763    0.03517
O4A   2    0.390567    0.546338    0.908452    10.50000    0.15592    0.07987 =
         0.10133   -0.01005   -0.04340    0.02195

O14A  2    0.000000    0.971481    0.050557    10.25000    0.10136    0.03351 =
         0.09491   -0.00270    0.00000    0.00000
C9A   1    0.272994    0.168516    0.121575    10.50000    0.12294    0.06115 =
         0.06311    0.01819   -0.01715    0.02634
AFIX  43
H9A   4    0.255470    0.147947    0.118216    10.50000   -1.20000
AFIX   0
C10A  1    0.249777    0.192873    0.077389    10.50000    0.12634    0.06140 =
         0.06787    0.01650   -0.01690    0.02696
AFIX  43
H10A  4    0.216325    0.188984    0.043874    10.50000   -1.20000
AFIX   0
C12A  1    0.324257    0.228692    0.131555    10.50000    0.12949    0.06324 =
         0.07260    0.01014   -0.01694    0.01834
AFIX  43
H12A  4    0.341688    0.249275    0.135137    10.50000   -1.20000
AFIX   0
C13A  1    0.347626    0.204429    0.175700    10.50000    0.12587    0.06504 =
         0.07055    0.01281   -0.01321    0.01380
AFIX  43
H13A  4    0.381058    0.208400    0.209190    10.50000   -1.20000
AFIX   0

C15A  1    0.401037    0.576221    0.917455    10.50000    0.16586    0.08250 =
         0.08619   -0.02025   -0.04357    0.04175
AFIX  66
C16A  1    0.380501    0.601365    0.863842    10.50000    0.17739    0.08737 =
         0.09001   -0.01646   -0.04547    0.05277
C17A  1    0.344501    0.593764    0.801904    10.50000    0.17683    0.09152 =
         0.09319   -0.01580   -0.04457    0.05440
AFIX  43
H17A  4    0.332017    0.572510    0.793648    10.50000   -1.20000
AFIX  65
C18A  1    0.326766    0.617261    0.752047    10.50000    0.18296    0.09728 =
         0.09471   -0.01403   -0.04283    0.05392
AFIX  43
H18A  4    0.302161    0.612066    0.709715    10.50000   -1.20000
AFIX  65
C19A  1    0.345031    0.648359    0.764127    10.50000    0.18479    0.09466 =
         0.08564   -0.00909   -0.03531    0.05737
C20A  1    0.381031    0.655961    0.826064    10.50000    0.18537    0.09341 =
         0.08716   -0.00525   -0.04038    0.05432
AFIX  43
H20A  4    0.393514    0.677215    0.834320    10.50000   -1.20000
AFIX  65
C21A  1    0.398766    0.632464    0.875922    10.50000    0.18518    0.09247 =
         0.08912   -0.00223   -0.04802    0.04445
AFIX  43
H21A  4    0.423371    0.637659    0.918253    10.50000   -1.20000
AFIX  66
C22A  1    0.320149    0.674677    0.716321    10.50000    0.18494    0.10025 =
         0.07021   -0.00536   -0.02815    0.05118
C23A  1    0.275797    0.667509    0.662360    10.50000    0.16861    0.10335 =
         0.06284    0.00579   -0.01683    0.04887
AFIX  43
H23A  4    0.262242    0.646311    0.655916    10.50000   -1.20000
AFIX  65
C24A  1    0.251281    0.691357    0.617826    10.50000    0.16494    0.10483 =
         0.06054    0.00661   -0.01155    0.04898
AFIX   3
H24A  4    0.220975    0.686457    0.580922    10.50000   -1.20000
AFIX  65
C25A  1    0.271115    0.722373    0.627253    10.50000    0.17372    0.10756 =
         0.06843    0.00495   -0.01014    0.04969
C26A  1    0.315466    0.729541    0.681215    10.50000    0.19308    0.10357 =
         0.07658    0.00180   -0.02509    0.05031
AFIX   3
H26A  4    0.329022    0.750740    0.687690    10.50000   -1.20000
AFIX  65
C27A  1    0.339983    0.705694    0.725750    10.50000    0.19981    0.10206 =
         0.08035    0.00229   -0.03286    0.04729
AFIX  43
H27A  4    0.370295    0.710593    0.762630    10.50000   -1.20000
AFIX   0
HKLF 4

REM  1
REM R1 =  0.1295 for    5708 Fo > 4sig(Fo)  and  0.1428 for all    7377 data
REM    481 parameters refined using    643 restraints

END

WGHT      0.2000      0.0000

REM Highest difference peak  1.475,  deepest hole -4.000,  1-sigma level  0.201
Q1    1   0.0000  0.9425  0.1321  10.50000  0.05    1.47
Q2    1   0.4707  0.0000  0.3952  10.50000  0.05    1.19
Q3    1   0.4497  0.0586  0.5000  10.50000  0.05    0.94
Q4    1   0.3624  0.0000  0.3995  10.50000  0.05    0.94
Q5    1   0.0000  0.9463  0.2072  10.50000  0.05    0.87
Q6    1   0.0870  1.0000  0.2282  10.50000  0.05    0.83
Q7    1   0.3767  0.0294  0.5000  10.50000  0.05    0.81
Q8    1   0.5000  0.0276  0.4410  10.50000  0.05    0.81
Q9    1   0.2760  0.0182  0.4073  11.00000  0.05    0.74
Q10   1   0.1081  0.9551  0.0000  10.50000  0.05    0.73
Q11   1   0.1427  0.9673  0.0000  10.50000  0.05    0.73
Q12   1   0.4601  0.0000  0.2756  10.50000  0.05    0.70
Q13   1   0.4585  0.0287  0.5000  10.50000  0.05    0.59
Q14   1   0.0934  1.0000  0.3181  10.50000  0.05    0.57
Q15   1   0.3696  0.7505  0.7295  11.00000  0.05    0.57
Q16   1   0.0617  1.0000  0.0000  10.25000  0.05    0.56
Q17   1   0.2191  1.0179 -0.0820  11.00000  0.05    0.56
Q18   1   0.2115  0.2439  0.0375  11.00000  0.05    0.56
Q19   1   0.0000  0.9676  0.0942  10.50000  0.05    0.56
Q20   1   0.2290  1.0000  0.1164  10.50000  0.05    0.55
;
_shelx_res_checksum               99784
_shelx_hkl_file
;
   0   0  -2 39008.2 324.205   1
   0   0  -3 80.5300 27.4931   1
   0   0  -4 63257.6 599.946   1
   0   0  -5 7483.32 241.411   1
   0   0  -6 25777.8 506.542   1
   0   0  -7 9680.09 344.793   1
   0   0  -8 32115.3 687.906   1
   0   0  -9 237168. 2044.49   1
   0   0  10 7666.69 594.135   6
   0   0 -10 8150.75 417.362   1
   0   0  11 132378. 2452.51   6
   0   0  13 19344.9 956.113   2
   0   0  14 274.251 168.408   2
   0   0  15 42.1651 135.337   2
   0   0  16 277.429 135.754   2
   0   0  17 3343.18 460.126   2
   0   0  18 9147.36 732.688   2
   0   0  19 3540.35 451.096   2
   0   0  20 3281.97 395.398   2
   0  -2  -2 88049.9 504.747   1
   0  -2  -3 2512.59 104.042   1
   0  -2  -4 10670.0 249.246   1
   0  -2  -5 86502.3 798.761   1
   0   2  -5 86050.6 842.069   1
   0  -2  -6 16402.9 391.472   1
   0   2  -6 17438.7 425.563   1
   0   2  -7 2473.19 192.340   1
   0  -2  -7 2362.11 171.938   1
   0  -2  -8 31695.7 675.753   1
   0   2  -8 33612.7 725.038   1
   0  -2  -9 155692. 1666.91   1
   0   2  -9 156383. 1718.71   1
   0  -2  10 3912.18 393.644   6
   0  -2 -10 3930.65 293.440   1
   0   2  10 4102.35 460.459   6
   0   2 -10 4048.86 303.620   1
   0   2  11 118318. 2358.34   6
   0   2  12 1259.73 275.607   6
   0   2  13 14980.0 940.979   6
   0  -2  13 14907.2 838.494   2
   0   2  14 251.981 174.755   2
   0  -2  14 161.839 124.840   2
   0  -2  15 1879.38 342.762   2
   0   2  15 1988.90 358.492   2
   0   2  16 583.167 220.973   2
   0  -2  16 571.650 243.855   2
   0   2  17 266.442 192.239   2
   0  -2  17 361.802 234.463   2
   0  -2  18 6374.79 599.452   2
   0   2  18 7174.03 658.273   2
   0   2  19 1031.91 257.524   2
   0  -2  19 707.080 248.383   2
   0  -2  20 17313.6 887.813   2
   0   2  20 19935.9 944.084   2
   0  -4   0 284438. 1167.78   1
   0  -4  -1 981.422 68.1756   1
   0  -4  -2 220282. 963.203   1
   0  -4  -3 231.953 46.3516   1
   0  -4  -4 203359. 1118.30   1
   0  -4  -5 38743.1 545.683   1
   0  -4  -6 88760.9 923.180   1
   0  -4  -7 4902.93 249.086   1
   0   4  -7 5510.94 272.458   1
   0   4  -8 1872.38 184.437   1
   0  -4  -8 1885.30 177.001   1
   0  -4  -9 208756. 1924.60   1
   0   4  -9 206123. 2003.09   1
   0  -4 -10 1909.56 212.089   1
   0   4 -10 1866.89 211.198   1
   0   4  10 1924.48 302.103   6
   0   4 -11 22085.3 748.995   1
   0   4  11 23425.7 1052.81   6
   0  -4  12 762.525 221.545   2
   0   4  12 648.208 216.357   6
   0   4  13 770.456 272.751   6
   0  -4  13 606.594 201.606   2
   0  -4  14 982.160 242.189   2
   0   4  14 1385.83 278.488   2
   0   4  14 1218.83 327.434   6
   0   4  15 15351.2 914.826   2
   0  -4  15 14238.4 885.039   2
   0   4  16 9918.73 769.088   2
   0  -4  16 9091.15 730.994   2
   0  -4  17 1539.54 333.958   2
   0   4  17 1233.26 268.532   2
   0  -4  18 80.5160 149.106   2
   0   4  18-57.9626 148.000   2
   0   4  19 3783.63 459.001   2
   0  -4  19 3726.58 433.576   2
   0  -4  20 9487.60 631.179   2
   0   4  20 11890.2 738.880   2
   0  -6   0 56310.0 640.609   1
   0  -6   1 829.328 103.741   1
   0  -6  -1 1001.33 86.7628   1
   0  -6  -2 58625.4 595.752   1
   0  -6  -3 833.584 83.2556   1
   0  -6  -4 122032. 953.274   1
   0  -6  -5 105519. 954.821   1
   0  -6  -6 31167.9 568.440   1
   0  -6  -7 38749.3 699.367   1
   0  -6  -8 1086.04 133.138   1
   0   6  -8 1280.40 172.069   1
   0  -6  -9 86076.1 1261.47   1
   0   6  -9 83867.1 1322.34   1
   0   6  10 3742.91 421.718   6
   0  -6 -10 3638.22 286.917   1
   0   6 -10 3662.10 295.237   1
   0  -6  10 3404.38 353.247   2
   0   6  11 16355.1 886.713   6
   0  -6  11 15386.2 779.782   2
   0   6 -11 14882.3 628.823   1
   0  -6  12 1099.41 232.393   2
   0   6  12 1011.74 243.424   6
   0  -6  13 16549.8 905.658   2
   0   6  13 16021.9 988.570   6
   0  -6  14 7799.90 632.461   2
   0   6  14 7728.56 712.691   6
   0   6  15 42251.9 1523.18   2
   0  -6  15 38133.8 1445.29   2
   0  -6  16 23790.8 1178.17   2
   0   6  16 25945.7 1206.48   2
   0  -6  17 15910.4 951.560   2
   0   6  17 17611.4 1024.90   2
   0  -6  18 4167.76 475.511   2
   0   6  18 4729.80 519.664   2
   0   6  19 865.715 265.553   2
   0  -6  19 1277.80 295.478   2
   0   6  20 1904.03 316.253   2
   0  -8   0 28611.1 534.854   1
   0  -8  -1 525.164 83.6687   1
   0  -8   1 526.487 109.555   1
   0  -8  -2 96022.1 919.813   1
   0  -8  -3 64494.1 750.809   1
   0  -8  -4 2057.09 145.393   1
   0  -8  -5 46430.6 691.108   1
   0  -8  -6 69806.7 913.596   1
   0  -8  -7 52756.4 872.944   1
   0  -8  -8 7980.79 369.152   1
   0  -8  -9 208.818 110.672   1
   0   8   9-51.8483 140.849   6
   0   8  -9 191.359 98.2746   1
   0   8 -10 443.237 126.256   1
   0  -8  10 213.247 115.812   2
   0   8  10 354.256 171.416   6
   0  -8 -10 348.143 119.367   1
   0  -8  11 47136.3 1379.65   2
   0   8 -11 50246.3 1171.41   1
   0  -8  12 82.4554 129.216   2
   0   8  12 129.514 130.179   6
   0  -8  13 24699.6 1071.60   2
   0   8  13 25631.5 1246.88   6
   0  -8  14 16811.9 935.415   2
   0   8  14 18832.9 1117.64   6
   0   8  15 77808.7 2299.72   6
   0   8  15 77511.6 2051.65   2
   0  -8  16 36720.5 1407.99   2
   0   8  16 38426.4 1469.66   2
   0  -8  17 2512.61 411.190   2
   0   8  17 2880.78 415.743   2
   0   8  18 501.722 214.886   2
   0   8  19-178.907 159.392   2
   0   8  20 1182.70 243.020   2
   0 -10   0 176336. 1511.54   1
   0 -10  -1 2100.64 174.811   1
   0 -10   1 2198.44 206.910   1
   0 -10  -2 4672.08 242.733   1
   0 -10  -3 1617.02 150.595   1
   0 -10  -4 117285. 1170.88   1
   0 -10  -5 138066. 1321.95   1
   0 -10  -6 145561. 1429.05   1
   0 -10  -7 210450. 1845.11   1
   0 -10  -8 7264.22 374.835   1
   0  10   9 14801.3 774.404   6
   0 -10  -9 14305.3 563.783   1
   0  10  10 12538.1 764.077   6
   0 -10 -10 12657.9 577.729   1
   0  10 -10 10703.3 553.341   1
   0  10 -11 11317.6 566.491   1
   0 -10  11 9887.29 614.270   2
   0  10  12 328.463 166.710   6
   0 -10  12 110.840 110.935   2
   0  10  13 19468.6 1094.09   6
   0 -10  13 18144.6 909.772   2
   0 -10  14 6377.81 558.637   2
   0  10  14 7279.49 712.326   6
   0  10  15 67363.0 1916.72   2
   0  10  15 67054.5 2178.64   6
   0  10  16 12091.0 829.267   2
   0  10  17 7078.81 646.023   2
   0  10  18 3037.15 416.668   2
   0  10  19-1.75442 112.196   2
   0  10  20 0.45822 102.858   2
   0 -12   0 233359. 1968.53   1
   0 -12   1 4856.07 341.014   1
   0 -12  -1 5123.84 290.523   1
   0 -12  -2 550.710 116.465   1
   0 -12  -3 19328.1 526.958   1
   0 -12  -4 29105.5 658.985   1
   0 -12  -5 92565.0 1212.00   1
   0 -12  -6 88162.3 1214.29   1
   0 -12  -7 179958. 1830.12   1
   0 -12  -8 335.850 108.349   1
   0  12   9 83472.6 1878.77   6
   0 -12  -9 86692.1 1485.79   1
   0 -12 -10 3366.10 324.928   1
   0  12  10 2925.68 390.593   6
   0  12  11 20456.8 1044.47   6
   0  12 -11 16186.7 689.059   1
   0  12  12 767.251 238.155   6
   0  12  13-60.3677 169.601   6
   0  12  14 6324.94 672.889   6
   0  12  15 15333.1 1047.87   6
   0  12  15 14619.4 905.690   2
   0  12  16 13863.0 884.763   2
   0  12  16 13724.8 999.592   6
   0  12  17 3530.37 473.918   2
   0  12  18 949.158 257.898   2
   0  12  19-51.1880 138.993   2
   0  12  20 537.876 166.409   2
   0 -14   0 254172. 2266.13   1
   0 -14  -1 3739.37 284.059   1
   0 -14   1 4260.20 345.579   1
   0 -14  -2 27519.7 751.571   1
   0 -14  -3 539.247 142.622   1
   0 -14  -4 34248.8 790.749   1
   0 -14  -5 24620.8 685.676   1
   0 -14  -6 136012. 1659.15   1
   0 -14  -7 4740.00 334.809   1
   0  14   8 1418.98 284.186   6
   0 -14  -8 1465.49 211.908   1
   0 -14  -9 37889.1 1064.36   1
   0  14   9 35486.1 1249.79   6
   0  14  10 4860.53 511.141   6
   0 -14 -10 5470.60 451.048   1
   0  14  11 30726.3 1286.94   6
   0  14  12 1362.13 299.651   6
   0  14  13 1060.16 303.055   6
   0  14  14 195.455 170.749   6
   0  14  15 18398.3 1125.85   6
   0  14  15 17051.2 1015.29   2
   0  14  16 8810.42 790.989   6
   0  14  16 9581.80 728.021   2
   0  14  17 120.963 144.708   2
   0  14  18 553.985 196.015   2
   0  14  19 2161.70 326.044   2
   0  14  20 5259.97 446.566   2
   0 -16   0 127867. 1858.08   1
   0 -16  -1 17018.3 638.445   1
   0 -16   1 18197.0 716.747   1
   0 -16  -2 47409.9 1053.95   1
   0 -16  -3 3136.11 274.648   1
   0 -16  -4 21246.3 705.539   1
   0 -16  -5 47543.6 1050.00   1
   0 -16  -6 730.950 157.863   1
   0 -16  -7 2262.20 254.113   1
   0  16   7 2271.77 314.864   6
   0 -16  -8 9454.19 533.892   1
   0  16   8 9632.84 633.183   6
   0  16   9 95610.3 2111.62   6
   0 -16  -9 96811.6 1838.47   1
   0  16  10 7485.38 641.275   6
   0 -16 -10 8444.86 584.713   1
   0  16  11 75419.8 2059.03   6
   0  16  12 536.681 236.495   6
   0  16  13 4432.06 540.244   6
   0  16  14 2098.79 397.605   6
   0  16  15 2343.44 399.951   2
   0  16  15 2918.93 469.978   6
   0  16  16 141.969 152.997   2
   0  16  16 853.749 308.280   6
   0  16  17 297.939 191.335   2
   0  16  18 5019.03 485.928   2
   0  16  19 1781.52 277.813   2
   0  16  20 15624.1 720.963   2
   0 -18   0 251832. 2869.28   1
   0 -18   1 2704.73 305.305   1
   0 -18  -1 2761.39 291.269   1
   0 -18  -2 4870.88 366.386   1
   0 -18  -3 223.416 115.386   1
   0 -18  -4 13225.6 606.092   1
   0 -18  -5 2373.53 267.766   1
   0  18   6 1275.86 242.757   6
   0 -18  -6 1637.87 233.520   1
   0  18   7 8809.47 590.427   6
   0 -18  -7 8647.03 524.359   1
   0  18   8 4800.07 489.195   6
   0 -18  -8 5010.05 426.943   1
   0 -18  -9 85529.1 1876.92   1
   0  18   9 83537.4 1996.16   6
   0  18  10 4448.44 515.715   6
   0 -18 -10 12558.4 943.690   1
   0  18  11 25928.4 1227.98   6
   0  18  12 781.439 261.032   6
   0  18  13 147.484 242.666   6
   0  18  14 3032.29 475.077   6
   0  18  15 7697.93 732.421   6
   0  18  15 7628.17 647.987   2
   0  18  16 3191.92 421.934   2
   0  18  16 3931.06 542.073   6
   0  18  17-9.39524 175.522   6
   0  18  17 410.623 196.043   2
   0  18  18 5099.49 488.626   2
   0  18  19 4480.53 425.065   2
   0 -20   0 227255. 2882.65   1
   0 -20  -1 7096.92 523.426   1
   0 -20  -2 561.447 163.701   1
   0 -20  -3 9058.43 546.951   1
   0 -20  -4 282.166 132.534   1
   0 -20  -5 19840.9 825.841   1
   0  20   5 18637.0 832.710   6
   0 -20  -6 28910.8 1016.42   1
   0  20   6 27616.9 1028.42   6
   0  20   7 5059.68 462.314   6
   0 -20  -7 5210.09 455.850   1
   0  20   8 7313.28 596.527   6
   0 -20  -8 8012.05 589.017   1
   0  20   9 49955.2 1580.10   6
   0 -20  -9 52383.0 1608.51   1
   0  20  10 6224.86 594.982   6
   0 -20 -10 6057.14 579.236   1
   0  20  11 46883.4 1681.04   6
   0  20  12-9.97706 206.555   6
   0  20  13 3643.61 559.538   6
   0  20  14 470.013 236.078   6
   0  20  15 11261.3 873.808   6
   0  20  15 12345.9 812.863   2
   0  20  16 6789.01 609.228   2
   0  20  16 6298.52 651.129   6
   0  20  17-29.0780 160.015   6
   0  20  17 578.002 208.665   2
   0  20  18 2685.75 344.119   2
   0  20  19 1098.74 215.691   2
   0 -22   0 216767. 2991.55   1
   0 -22  -1 7393.08 600.068   1
   0 -22  -2 2473.92 332.840   1
   0  22   3 15955.2 795.361   6
   0  22   3 16676.6 763.897   4
   0  22   4 152503. 2424.66   6
   0 -22  -4 149727. 2379.29   1
   0 -22  -5 30163.3 1087.50   1
   0  22   5 30190.2 1097.97   6
   0  22   6 26934.2 1047.93   6
   0 -22  -6 28006.9 1064.32   1
   0  22   7 8849.05 630.209   6
   0 -22  -7 10728.3 682.141   1
   0 -22  -8 344.591 191.104   1
   0  22   8 171.170 123.284   6
   0 -22  -9 11507.4 826.616   1
   0  22   9 10210.9 739.495   6
   0  22  10 1137.35 322.377   6
   0  22  11 5623.04 633.603   6
   0  22  12 463.929 239.089   6
   0  22  13 2686.10 514.579   6
   0  22  14 4397.10 497.835   2
   0  22  14 3685.24 541.368   6
   0  22  15 18101.4 961.846   2
   0  22  15 17228.8 1060.90   6
   0  22  16 4519.34 531.452   6
   0  22  16 4812.23 495.379   2
   0  22  17 1244.69 279.301   6
   0  22  17 1024.50 217.469   2
   0  22  18 145.048 143.307   2
   0  24   0 94219.7 1901.28   4
   0  24   1 2941.68 356.309   4
   0  24  -1 3135.90 363.118   4
   0 -24  -1 3162.11 413.510   1
   0  24  -2 140.993 116.180   4
   0 -24  -2 158.141 125.309   1
   0  24   2 190.970 149.699   4
   0  24   3 13769.8 743.219   4
   0  24   3 13109.4 760.956   6
   0  24   4 127300. 2312.22   6
   0 -24  -4 129224. 2398.71   1
   0 -24  -5 95829.8 2087.73   1
   0  24   5 94843.5 2005.96   6
   0  24   6 46340.8 1419.95   6
   0 -24  -6 47433.1 1494.06   1
   0  24   7 51768.1 1553.62   6
   0 -24  -7 50280.2 1609.22   1
   0  24   8 1078.57 296.597   6
   0 -24  -8 1104.90 275.423   1
   0 -24  -9 9566.82 781.102   1
   0  24   9 9672.98 745.355   6
   0  24  10 442.358 237.109   6
   0  24  11 1013.74 319.751   6
   0  24  12 1989.60 378.927   6
   0  24  13 665.766 341.478   6
   0  24  14 6864.82 615.906   2
   0  24  14 7345.65 708.150   6
   0  24  15 20504.8 1024.13   2
   0  24  15 19440.4 1109.95   6
   0  24  16 13205.5 801.286   2
   0  24  16 13172.8 890.685   6
   0  24  17 6525.05 530.486   2
   0  24  17 6387.87 569.805   6
   0  24  18 550.783 151.541   2
   0  26   0 35956.9 1263.27   4
   0 -26  -1 760.510 224.601   1
   0  26  -1 961.684 267.550   4
   0  26   1 752.182 216.961   4
   0  26   2 2422.39 323.651   4
   0 -26  -2 2479.69 392.329   1
   0  26  -2 2456.49 335.111   4
   0  26   2 2647.07 358.117   6
   0  26   3 14249.9 816.869   6
   0 -26  -3 13268.4 877.066   1
   0  26  -3 14719.7 794.956   4
   0  26   4 102742. 2141.13   6
   0 -26  -4 90504.9 2252.27   1
   0  26   5 90071.8 2029.94   6
   0 -26  -5 96954.6 2281.91   1
   0 -26  -6 86402.9 2218.62   1
   0  26   6 88108.8 2024.36   6
   0 -26  -7 24958.9 1226.55   1
   0  26   7 23706.8 1081.71   6
   0  26   8 129.425 118.499   6
   0 -26  -8 172.641 200.504   1
   0 -26  -9 3447.41 524.556   1
   0  26   9 3708.62 484.754   6
   0  26  10 1932.75 378.343   6
   0  26  11 336.634 248.839   6
   0  26  12 1167.73 374.433   6
   0  26  13 21395.8 1067.98   2
   0  26  13 20205.1 1152.65   6
   0  26  14 2080.64 374.673   2
   0  26  14 1552.13 335.561   6
   0  26  15 30074.0 1213.11   2
   0  26  15 29067.9 1309.21   6
   0  26  16 12249.8 729.309   2
   0  26  16 12752.8 836.272   6
   0  26  17 3960.89 398.100   2
   0  26  17 4192.20 446.948   6
   0  28   0 27432.7 1163.45   4
   0  28   1 2016.34 335.516   4
   0  28  -1 2232.26 322.360   4
   0  28  -2 483.964 182.701   4
   0 -28  -2 438.175 188.818   1
   0  28   2 422.750 177.796   4
   0  28   2 327.099 149.017   6
   0  28   3 5780.78 536.496   6
   0  28  -3 6149.10 521.031   4
   0 -28  -3 5420.11 597.999   1
   0 -28  -4 46437.1 1753.31   1
   0  28   4 50589.9 1557.23   6
   0 -28  -5 45416.6 1776.11   1
   0  28   5 48063.7 1534.93   6
   0  28   6 19156.6 975.804   6
   0 -28  -6 16408.3 1082.19   1
   0  28   7 10175.9 728.694   6
   0 -28  -7 8293.98 777.581   1
   0 -28  -8 422.190 267.484   1
   0  28   8 219.067 168.448   6
   0 -28  -9 14183.7 1149.55   1
   0  28   9 17232.2 1018.77   6
   0  28  10 1236.48 301.518   6
   0  28  11 2702.22 425.899   6
   0  28  12 137.168 162.680   2
   0  28  12-57.8971 215.346   6
   0  28  13 14086.3 938.682   6
   0  28  13 14318.9 851.535   2
   0  28  14 8229.32 718.141   6
   0  28  14 7778.23 627.875   2
   0  28  15 19862.1 939.059   2
   0  28  15 20590.2 1057.17   6
   0  28  16 12817.3 800.065   6
   0  28  16 11054.9 651.851   2
   0  28  17 2085.74 306.452   6
   0  30   0 33306.7 1323.98   4
   0  30   1 2859.93 428.857   4
   0  30  -1 2911.62 409.264   4
   0  30   2 1502.81 299.989   6
   0  30  -2 1136.10 245.754   4
   0  30  -3 4720.37 475.732   4
   0  30   3 4625.28 505.247   6
   0 -30  -3 4420.63 565.563   1
   0 -30  -4 26981.1 1381.70   1
   0  30   4 30457.7 1238.47   6
   0  30   5 2323.40 353.101   6
   0 -30  -5 2197.38 432.876   1
   0 -30  -6 2129.16 439.788   1
   0  30   6 1889.45 313.828   6
   0  30   7 11630.8 794.522   6
   0 -30  -7 10126.3 962.472   1
   0  30   8 1009.02 313.951   6
   0 -30  -8 843.911 342.421   1
   0  30   9 27812.3 1289.45   6
   0  30  10 3809.98 514.435   6
   0  30  11 23450.0 1205.90   6
   0  30  12 592.151 251.906   6
   0  30  13 1842.50 339.637   6
   0  30  14 5510.87 575.683   6
   0  30  15 18267.8 982.316   6
   0  30  16 1917.84 292.247   6
   0  32   0 122878. 2591.50   4
   0  32   1 7582.60 640.327   6
   0  32  -1 8336.09 700.442   4
   0  32  -2 20382.2 1040.69   4
   0  32   2 19991.1 1033.01   6
   0  32   3-76.6811 136.196   6
   0  32  -3 90.9420 149.887   4
   0  32   4 1796.77 315.730   6
   0  32   5 1138.06 273.483   6
   0 -32  -5 762.010 272.587   1
   0 -32  -6 17425.0 1255.70   1
   0  32   6 21828.8 1092.22   6
   0 -32  -7 1019.71 375.098   1
   0  32   7 1602.07 334.319   6
   0  32   8 2187.85 403.424   6
   0  32   9 47415.7 1680.86   6
   0  32  10 7300.15 681.958   6
   0  32  11 39576.2 1542.57   6
   0  32  12 809.077 268.607   6
   0  32  13 1010.50 279.824   6
   0  32  14 784.669 247.967   6
   0  32  15 4260.18 444.592   6
   0  32  16 1458.15 242.566   6
   0  34   0 142595. 2834.06   6
   0  34   1 10567.2 793.596   6
   0  34   2 23140.2 1135.76   6
   0  34  -3 17417.9 913.468   4
   0  34   3 15466.8 942.462   6
   0  34   4 2595.96 401.968   6
   0  34   5 15925.5 937.395   6
   0  34   6 5981.46 582.493   6
   0  34   7 1120.98 261.534   6
   0  34   8 3996.86 499.092   6
   0  34   9 56590.7 1825.30   6
   0  34  10 8840.17 746.481   6
   0  34  11 51701.2 1717.29   6
   0  34  12 2298.09 389.154   6
   0  34  13 5102.89 524.043   6
   0  34  14-47.7061 131.116   6
   0  34  15 112.761 123.886   6
   0  36   0 142204. 2859.75   6
   0  36   1 8407.51 738.469   6
   0  36   2 83470.4 2182.66   6
   0  36   3 977.704 270.124   6
   0  36   4 11363.4 797.181   6
   0  36   5 5853.84 582.967   6
   0  36   6 8064.27 675.173   6
   0  36   7 344.300 182.699   6
   0  36   8 3435.93 470.820   6
   0  36   9 33540.7 1387.06   6
   0  36  10 8664.37 705.881   6
   0  36  11 39049.4 1438.78   6
   0  36  12 1938.03 334.152   6
   0  36  13 3152.21 379.088   6
   0  36  14 6.23017 111.881   6
   0  38   0 73757.6 2051.61   6
   0  38   1 15799.9 980.791   6
   0  38  -1 17583.4 1035.92   6
   0  38   2 10618.5 794.568   6
   0  38   3 1952.19 339.826   6
   0  38   4 16009.9 947.874   6
   0  38   5 7820.70 673.418   6
   0  38   6 2948.85 406.717   6
   0  38   7 1523.60 307.324   6
   0  38   8 939.592 274.280   6
   0  38   9 20909.5 1065.81   6
   0  38  10 3922.40 461.927   6
   0  38  11 17147.2 907.163   6
   0  38  12 340.005 142.780   6
   0  38  13 287.784 168.683   6
   0  40   0 86243.8 2211.29   6
   0  40   1 1451.32 313.895   6
   0  40  -1 1708.22 338.511   6
   0  40  -2 2636.98 413.003   6
   0  40   2 2429.30 377.209   6
   0  40   3 5566.16 557.069   6
   0  40  -3 8368.42 670.596   6
   0  40   4 23957.2 1134.81   6
   0  40   5 12967.6 835.048   6
   0  40   6 8105.73 666.155   6
   0  40   7 1363.37 298.891   6
   0  40   8 100.696 106.407   6
   0  40   9 9923.86 704.652   6
   0  40  10 1122.46 261.484   6
   0  40  11 2660.17 338.597   6
   0  40  12 44.5610 92.2608   6
   0  42   0 6639.78 604.807   6
   0  42   1 391.765 146.084   6
   0  42  -1 846.961 235.089   6
   0  42   2 2218.88 363.715   6
   0  42  -2 2166.97 356.866   6
   0  42   3 4691.08 496.111   6
   0  42  -3 5631.18 539.516   6
   0  42  -4 25408.5 1116.23   6
   0  42   4 26197.1 1150.25   6
   0  42   5 25356.8 1136.07   6
   0  42   6 19655.6 988.457   6
   0  42   7 2105.08 326.042   6
   0  42   8-1.03658 127.851   6
   0  42   9 1052.63 229.941   6
   0  42  10 287.779 154.823   6
   0  44   0 5843.03 536.647   6
   0  44  -1 329.966 157.038   6
   0  44   1 589.808 215.934   6
   0  44   2 1430.88 282.010   6
   0  44  -2 1026.76 244.338   6
   0  44   3 4008.53 434.092   6
   0  44  -3 4106.77 439.364   6
   0  44   4 22666.7 1032.41   6
   0  44  -4 19927.1 920.098   6
   0  44   5 19921.2 953.647   6
   0  44  -5 18612.7 864.132   6
   0  44   6 14926.2 812.115   6
   0  44  -6 11223.3 640.611   6
   0  44   7 10022.2 648.569   6
   0  44  -7 7522.13 503.887   6
   0  44  -8 302.455 103.554   6
   0  44   8 1354.98 298.143   6
   0  44   9 918.365 189.736   6
   0  46   0 9493.24 603.111   6
   0  46  -1 1412.73 250.564   6
   0  46   1 941.243 201.967   6
   0  46  -2 170.820 112.712   6
   0  46   2 138.099 129.876   6
   0  46   3 1465.38 253.334   6
   0  46  -3 1320.02 298.707   6
   0  46   4 11653.4 684.714   6
   0  46  -4 9069.77 557.857   6
   0  46  -5 8729.06 529.572   6
   0  46   5 10597.1 639.793   6
   0  46   6 9422.68 590.958   6
   0  48   0 11829.1 606.161   6
   0  48  -1 1196.29 202.511   6
   0  48   1 1338.35 214.656   6
   0  48   2 3555.75 342.674   6
   0  48   3 337.481 125.161   6
   1  -1  -2 2828.92 103.493   1
  -1  -1  -2 3051.26 72.0863   1
   1  -1  -3 48.0342 30.6758   1
  -1  -1  -3 65.0114 23.1729   1
   1   1  -4 7788.92 244.194   1
   1  -1  -4 8217.46 236.608   1
  -1   1  -4 7491.37 200.429   1
  -1  -1  -4 7618.28 190.287   1
   1   1  -5 21398.4 438.949   1
  -1   1  -5 21375.0 376.807   1
  -1  -1  -5 20631.7 363.202   1
   1  -1  -5 22119.9 432.272   1
  -1  -1  -6 7429.58 249.686   1
   1   1  -6 6931.20 284.535   1
   1  -1  -6 7094.00 282.140   1
  -1   1  -6 6957.36 249.745   1
   1  -1  -7 1891.35 160.956   1
  -1   1  -7 1988.48 150.574   1
   1   1  -7 1680.59 157.712   1
  -1  -1  -7 1829.41 144.412   1
  -1  -1  -8 63374.2 913.480   1
  -1   1  -8 65023.7 933.398   1
   1   1  -8 63739.9 1021.93   1
   1  -1  -8 62323.2 992.850   1
   1  -1  -9 13221.0 500.917   1
   1   1  -9 13890.9 516.986   1
  -1   1  -9 13735.5 475.321   1
  -1  -1  -9 13529.0 465.852   1
   1   1 -10 137018. 1776.31   1
  -1   1  10 134740. 2328.68   6
  -1  -1 -10 134978. 1576.32   1
  -1   1 -10 134140. 1590.93   1
   1   1  10 136080. 2388.55   6
  -1  -1  10 131062. 2264.59   6
   1  -1 -10 135932. 1750.47   1
   1  -1  10 134968. 2340.71   6
   1   1 -11 322.248 104.296   1
   1  -1 -11 331.436 122.258   1
  -1   1  11 262.793 131.665   6
   1   1  11 379.903 196.403   6
  -1  -1  11 416.766 183.571   6
  -1   1  12 62877.3 1790.85   6
   1  -1  12 64637.1 1664.89   2
   1   1  12 62639.1 1803.60   6
   1  -1  13 1291.15 294.863   2
   1   1  13 948.188 228.999   2
   1  -1  14 2947.05 413.984   2
  -1  -1  14 3176.59 399.907   2
   1   1  14 3234.27 435.798   2
   1  -1  15-129.301 177.051   2
  -1  -1  15 170.566 173.843   2
  -1   1  15 314.107 183.313   2
   1   1  15 286.937 289.837   2
   1   1  16 38.3630 170.170   2
  -1  -1  16-111.850 208.081   2
   1  -1  16 254.313 202.476   2
  -1   1  16-0.16172 158.987   2
  -1  -1  17 1512.61 310.247   2
   1  -1  17 2619.95 407.113   2
  -1   1  17 2027.77 392.076   2
   1   1  17 1663.47 358.676   2
  -1  -1  18 3035.71 436.211   2
  -1   1  18 3423.74 458.630   2
   1   1  18 3003.90 431.485   2
   1  -1  18 2425.96 386.136   2
   1  -1  19 9019.70 686.962   2
  -1   1  19 10063.7 723.046   2
   1   1  19 9426.53 700.886   2
  -1  -1  19 9120.17 672.154   2
  -1   1  20 1056.42 255.025   2
   1   1  20 759.560 217.817   2
   1  -1  20 1056.42 267.731   2
  -1  -1  20 718.028 272.379   2
   1  -3   0 85.3508 27.3849   1
   1  -3  -1 282969. 979.506   1
   1  -3   1 285477. 1146.22   1
  -1  -3  -2 6985.94 146.969   1
   1  -3  -2 6325.83 163.716   1
   1  -3  -3 5098.69 167.284   1
  -1  -3  -3 5592.22 144.728   1
  -1  -3  -4 8744.72 211.540   1
   1  -3  -4 8607.44 242.944   1
  -1  -3  -5 58111.8 616.338   1
   1  -3  -5 59080.8 696.633   1
   1   3  -6 34465.3 660.610   1
  -1   3  -6 35948.5 592.668   1
   1  -3  -6 35077.6 601.417   1
  -1  -3  -6 35538.5 544.067   1
  -1   3  -7 642.074 104.326   1
   1  -3  -7 707.207 103.759   1
  -1  -3  -7 649.645 85.4800   1
   1   3  -7 716.621 114.952   1
  -1   3  -8 50779.7 860.287   1
   1  -3  -8 49602.1 876.437   1
  -1  -3  -8 50388.6 816.981   1
   1   3  -8 47794.1 923.716   1
   1  -3  -9 15741.9 556.441   1
   1   3  -9 16184.9 576.962   1
  -1  -3  -9 15896.6 503.776   1
  -1   3  -9 16089.0 527.015   1
   1   3  10 89029.3 1921.93   6
   1   3 -10 88977.5 1456.98   1
  -1   3  10 88770.0 1891.97   6
   1  -3  10 89822.6 1781.75   2
  -1   3 -10 87628.9 1312.78   1
  -1  -3 -10 92203.9 1325.32   1
   1  -3 -10 88138.4 1408.68   1
   1   3 -11 138.443 72.5976   1
  -1   3  11 88.8064 126.999   6
   1  -3 -11 184.993 97.3936   1
   1  -3  11 292.460 169.906   2
   1   3  11 342.639 160.655   6
   1  -3  12 20803.2 952.171   2
   1   3  12 21014.7 1058.61   6
  -1   3  12 19663.5 1034.39   6
   1   3  13 408.638 195.075   2
   1   3  13 351.004 179.516   6
  -1  -3  13 463.135 204.597   2
  -1   3  13 294.441 176.462   6
   1  -3  13 360.348 142.330   2
   1   3  14 1336.64 301.047   2
   1  -3  14 1364.94 300.558   2
  -1  -3  14 1257.74 285.386   2
  -1   3  15 1818.13 331.888   2
   1  -3  15 1777.39 355.909   2
  -1  -3  15 1789.46 362.118   2
   1   3  15 1239.95 273.849   2
   1  -3  16 2346.90 395.378   2
  -1  -3  16 2223.23 374.081   2
   1   3  16 2555.72 406.982   2
  -1   3  16 2448.41 379.840   2
  -1  -3  17 28.7589 156.348   2
   1  -3  17 229.090 151.491   2
   1   3  17 292.379 181.718   2
  -1   3  17 448.065 193.462   2
   1   3  18 1396.75 335.492   2
  -1  -3  18 707.174 223.396   2
   1  -3  18 1013.64 281.694   2
  -1   3  18 933.619 265.813   2
  -1  -3  19 9089.72 667.520   2
   1   3  19 9689.73 725.897   2
  -1   3  19 9424.07 712.751   2
   1  -3  19 9164.89 695.419   2
   1  -3  20 782.807 233.118   2
   1   3  20 1478.09 292.057   2
  -1  -3  20 973.652 240.199   2
  -1   3  20 1078.60 257.132   2
  -1  -5   0 144.512 64.5507   1
   1  -5   0 85.9791 41.3093   1
   1  -5  -1 29950.4 388.207   1
   1  -5   1 30277.7 456.218   1
  -1  -5  -1 30665.8 423.306   1
  -1  -5  -2 2388.43 117.386   1
   1  -5  -2 2470.27 118.210   1
  -1  -5  -3 5518.70 170.642   1
   1  -5  -3 5071.23 184.434   1
   1  -5  -4 23204.2 415.745   1
  -1  -5  -4 23786.8 388.158   1
   1  -5  -5 40506.5 602.258   1
  -1  -5  -5 41209.2 553.421   1
   1  -5  -6 36961.5 632.362   1
  -1  -5  -6 36722.4 577.889   1
  -1  -5  -7 1464.82 133.476   1
   1  -5  -7 1441.10 135.776   1
  -1  -5  -8 12223.3 407.840   1
  -1   5  -8 11398.3 423.691   1
   1  -5  -8 11604.2 427.312   1
   1   5  -8 11809.6 465.780   1
   1   5  -9 11981.7 502.443   1
  -1   5  -9 11738.3 474.567   1
  -1  -5  -9 11756.9 442.340   1
   1  -5  -9 11442.6 471.879   1
  -1   5 -10 52216.2 1034.55   1
   1   5  10 54347.5 1511.33   6
   1   5 -10 53749.3 1166.14   1
   1  -5 -10 53188.0 1118.89   1
   1  -5  10 50876.8 1343.88   2
  -1   5  10 55496.7 1525.23   6
  -1  -5 -10 51559.8 1015.52   1
  -1   5  11 295.462 145.779   6
   1   5 -11 205.647 102.622   1
   1  -5  11 82.6961 114.217   2
   1  -5 -11 258.008 99.5079   1
   1   5  11 371.948 179.062   6
  -1   5  12 917.086 238.563   6
  -1  -5  12 1322.43 249.385   2
   1  -5  12 1318.98 269.712   2
   1   5  12 1049.13 257.557   6
  -1   5  13 569.500 252.808   6
   1  -5  13 403.285 185.352   2
   1   5  13 344.621 242.340   6
  -1  -5  13 451.562 161.721   2
   1   5  14 19820.2 1131.77   6
   1  -5  14 17649.7 984.709   2
  -1   5  14 18842.4 1101.73   6
   1   5  14 19588.1 1003.65   2
  -1  -5  14 18216.6 970.869   2
  -1  -5  15 8005.20 654.900   2
   1   5  15 9217.76 731.790   2
  -1   5  15 9483.25 735.905   2
   1  -5  15 8027.72 680.689   2
   1   5  16 19592.5 1081.78   2
  -1   5  16 20094.9 1073.50   2
   1  -5  16 18477.8 1047.10   2
  -1  -5  16 18054.2 1014.03   2
  -1   5  17 5807.47 593.228   2
   1  -5  17 5109.12 543.455   2
   1   5  17 5150.97 582.715   2
  -1  -5  17 4722.43 533.440   2
  -1  -5  18 738.532 245.502   2
   1   5  18 380.130 233.704   2
  -1   5  18 468.326 216.510   2
   1  -5  18 487.705 244.555   2
   1  -5  19 6401.08 587.839   2
   1   5  19 6961.93 615.278   2
  -1   5  19 7589.23 634.447   2
  -1  -5  19 5479.79 506.511   2
   1  -5  20 74.8711 96.6390   2
   1   5  20 248.259 178.232   2
  -1   5  20 271.390 172.391   2
  -1  -7   0-22.5080 73.1790   1
   1  -7   0 83.8157 58.3333   1
   1  -7  -1 347.187 65.4455   1
  -1  -7  -1 457.915 80.0107   1
   1  -7   1 553.375 90.0574   1
  -1  -7  -2 2328.92 137.579   1
   1  -7  -2 2423.42 136.702   1
  -1  -7  -3 50610.3 650.369   1
   1  -7  -3 53742.4 646.827   1
   1  -7  -4 884.845 93.0027   1
  -1  -7  -4 957.614 92.9392   1
   1  -7  -5 67396.3 811.074   1
  -1  -7  -5 67121.1 777.448   1
   1  -7  -6 51897.7 780.394   1
  -1  -7  -6 49024.1 730.708   1
  -1  -7  -7 18614.2 488.337   1
   1  -7  -7 21933.2 551.241   1
  -1  -7  -8 4079.64 251.610   1
   1  -7  -8 4044.74 257.472   1
   1   7  -9 392.723 112.266   1
   1  -7  -9 396.878 109.599   1
  -1   7  -9 311.503 84.1920   1
  -1  -7  -9 472.204 112.222   1
   1  -7 -10 35573.8 922.379   1
  -1   7  10 35597.1 1247.44   6
   1   7  10 34374.2 1222.88   6
   1   7 -10 35364.6 954.550   1
  -1   7 -10 32192.7 842.623   1
  -1   7  11 315.995 166.501   6
   1  -7 -11 238.186 107.214   1
   1   7 -11 320.534 120.668   1
  -1  -7  11 341.387 167.485   2
   1  -7  11 233.303 143.937   2
   1   7  11 206.782 131.962   6
   1  -7  12 2196.59 323.416   2
  -1  -7  12 2396.95 334.605   2
  -1   7  12 2044.41 342.229   6
   1   7  12 1809.86 336.738   6
   1  -7  13 1065.69 252.665   2
   1   7  13 1341.10 364.108   6
  -1   7  13 1088.34 303.459   6
  -1  -7  13 827.577 201.446   2
  -1  -7  14 42911.9 1458.88   2
  -1   7  14 42139.4 1655.34   6
   1   7  14 42291.6 1653.99   6
   1   7  14 44340.3 1510.63   2
   1  -7  14 39665.6 1459.98   2
   1  -7  15 24199.4 1169.58   2
  -1   7  15 24007.2 1285.59   6
   1   7  15 24960.6 1184.10   2
  -1  -7  15 23582.1 1122.66   2
   1  -7  16 37744.6 1467.05   2
   1   7  16 42105.6 1558.51   2
  -1  -7  16 38487.5 1431.87   2
  -1   7  16 42953.9 1540.33   2
  -1  -7  17 6213.70 583.203   2
   1   7  17 7346.47 669.368   2
   1  -7  17 6514.28 640.282   2
  -1   7  17 6959.20 644.818   2
  -1   7  18-113.785 158.154   2
   1  -7  18 222.304 149.711   2
   1   7  18-57.8962 161.468   2
  -1   7  19 747.453 231.440   2
   1   7  19 604.196 201.135   2
   1  -7  19 538.004 218.237   2
   1   7  20 137.413 116.566   2
  -1   7  20 306.486 195.023   2
   1  -9   0 1133.03 128.575   1
  -1  -9   0 1199.39 153.737   1
  -1  -9  -1 2268.91 169.056   1
   1  -9   1 2495.43 187.113   1
   1  -9  -1 2181.06 164.002   1
   1  -9  -2 3185.73 181.948   1
  -1  -9  -2 3353.00 200.105   1
   1  -9   2 3406.25 243.674   1
  -1  -9  -3 98516.7 1001.25   1
   1  -9  -3 98026.5 986.101   1
  -1  -9  -4 74971.7 899.936   1
   1  -9  -4 74767.3 890.297   1
   1  -9  -5 96013.3 1055.74   1
  -1  -9  -5 94882.8 1033.43   1
   1  -9  -6 105165. 1176.07   1
  -1  -9  -6 106633. 1170.80   1
   1  -9  -7 46016.0 841.242   1
  -1  -9  -7 46057.7 821.232   1
   1  -9  -8 35110.3 801.959   1
  -1  -9  -8 36593.6 795.745   1
   1   9   9 500.192 173.424   6
  -1  -9  -9 455.761 111.863   1
  -1   9   9 332.240 150.170   6
   1   9  -9 411.243 117.990   1
   1  -9  -9 352.704 101.514   1
   1   9  10 21302.4 982.644   6
   1  -9 -10 20588.0 740.451   1
   1   9 -10 17792.7 695.757   1
  -1   9  10 21588.6 985.223   6
   1  -9  10 15347.4 748.051   2
  -1   9 -10 18053.6 653.902   1
   1  -9 -11 245.561 138.492   1
   1  -9  11 524.051 202.097   2
   1   9  11 273.989 180.850   6
   1   9 -11 156.736 93.6158   1
  -1   9  11 278.223 159.628   6
  -1  -9  11 81.0802 99.0121   2
   1  -9  12 193.105 157.753   2
   1   9  12 197.147 137.388   6
  -1   9  12 95.4020 171.025   6
  -1  -9  12 48.5857 98.0331   2
  -1   9  13 1904.12 357.802   6
   1   9  13 2510.48 425.155   6
   1  -9  13 2304.66 336.088   2
  -1  -9  13 2191.06 320.583   2
  -1  -9  14 41613.9 1410.21   2
  -1   9  14 46817.6 1764.80   6
   1   9  14 46571.9 1573.14   2
   1  -9  14 44013.7 1515.21   2
   1   9  14 46481.7 1743.92   6
   1  -9  15 19410.9 1028.14   2
   1   9  15 21134.2 1221.33   6
  -1  -9  15 19776.5 1008.14   2
  -1   9  15 21261.6 1219.05   6
   1   9  15 20731.7 1090.27   2
  -1   9  16 28111.2 1250.39   2
   1  -9  16 27577.7 1232.51   2
   1   9  16 30133.0 1315.93   2
   1   9  17 6288.69 605.061   2
   1  -9  17 5150.86 526.586   2
  -1   9  17 5753.13 578.046   2
   1   9  18 1294.89 278.941   2
  -1   9  18 885.156 242.582   2
   1   9  19 25.0670 126.343   2
  -1   9  19-20.6204 120.867   2
  -1   9  20 26.1359 95.6182   2
   1   9  20-7.87955 130.025   2
  -1 -11   0 2242.13 224.741   1
   1 -11   0 2428.42 205.126   1
   1 -11   1 40131.9 788.365   1
   1 -11  -1 37588.9 710.587   1
  -1 -11  -1 41515.0 824.096   1
  -1 -11  -2 1275.12 147.832   1
   1 -11  -2 1269.91 147.120   1
   1 -11   2 1441.58 195.294   1
   1 -11  -3 12933.1 407.755   1
  -1 -11  -3 12419.6 420.531   1
  -1 -11  -4 19900.3 524.965   1
   1 -11  -4 20480.8 515.578   1
   1 -11  -5 96552.0 1151.78   1
  -1 -11  -5 97835.8 1186.49   1
   1 -11  -6 100184. 1234.32   1
  -1 -11  -6 98912.1 1260.19   1
   1 -11  -7 76119.6 1143.53   1
  -1 -11  -7 74407.2 1161.96   1
   1 -11  -8 13743.5 523.553   1
  -1 -11  -8 14369.5 539.266   1
  -1  11   9 1129.22 253.753   6
   1  11   9 867.982 189.352   6
  -1 -11  -9 928.927 165.638   1
   1 -11  -9 879.582 169.890   1
  -1  11 -10 16562.1 637.613   1
   1  11  10 18648.5 925.511   6
  -1  11  10 18369.4 925.430   6
   1  11 -10 17172.3 716.117   1
   1 -11 -10 19017.7 733.522   1
  -1  11  11 316.190 217.131   6
   1  11 -11 319.914 111.026   1
   1  11  11 356.008 188.815   6
   1 -11 -11 282.615 141.018   1
   1 -11  11 337.525 154.252   2
  -1  11  12-11.5379 158.946   6
   1 -11  12 313.899 159.812   2
   1  11  12 192.434 201.958   6
   1  11  13 1068.57 304.871   6
   1 -11  13 1308.40 253.774   2
  -1  11  13 1876.07 400.541   6
   1  11  14 26265.6 1203.04   2
   1  11  14 27971.0 1377.59   6
  -1  11  14 27319.0 1355.59   6
   1 -11  14 25199.5 1130.18   2
   1  11  15 10372.3 764.828   2
  -1  11  15 11153.4 910.634   6
   1 -11  15 9418.28 699.086   2
   1  11  15 11708.1 925.634   6
  -1  11  16 14821.3 1036.49   6
   1  11  16 13965.7 892.144   2
  -1  11  16 14271.2 908.343   2
   1  11  17 6774.80 631.331   2
  -1  11  17 6600.19 599.803   2
   1  11  18 377.670 158.420   2
  -1  11  18 108.153 141.283   2
  -1  11  19 43.0662 119.782   2
   1  11  19-129.969 165.428   2
   1  11  20 205.149 121.572   2
  -1  11  20-114.291 153.114   2
  -1 -13   0 4862.28 342.103   1
   1 -13   0 5143.80 324.789   1
   1 -13   1 107338. 1486.05   1
  -1 -13  -1 103498. 1351.26   1
   1 -13  -1 100375. 1322.22   1
   1 -13   2 652.321 156.625   1
  -1 -13  -2 595.224 121.421   1
   1 -13  -2 782.501 126.706   1
   1 -13  -3 20160.5 560.871   1
  -1 -13  -3 20128.7 595.969   1
   1 -13  -4 8527.25 378.122   1
  -1 -13  -4 8428.30 387.866   1
  -1 -13  -5 61227.9 1049.74   1
   1 -13  -5 61180.6 1014.75   1
  -1 -13  -6 135143. 1617.53   1
   1 -13  -6 136753. 1574.13   1
  -1 -13  -7 22822.3 692.633   1
   1 -13  -7 21891.2 666.962   1
   1 -13  -8 2423.18 250.765   1
   1  13   8 2306.85 294.669   6
  -1  13   8 2449.93 310.800   6
  -1 -13  -8 2304.60 244.663   1
  -1  13   9 5871.44 511.299   6
  -1 -13  -9 5908.30 407.787   1
   1 -13  -9 5952.38 404.251   1
   1  13   9 5800.15 510.130   6
   1  13  10 44999.4 1481.66   6
  -1  13  10 46222.6 1494.52   6
   1 -13 -10 46800.1 1223.70   1
   1 -13 -11 776.106 168.720   1
  -1  13  11 871.738 259.920   6
   1  13 -11 586.750 165.236   1
   1  13  11 710.174 222.122   6
   1  13  12 2280.57 394.348   6
  -1  13  12 1949.17 367.026   6
  -1  13  13 408.895 236.210   6
   1  13  13-127.156 143.978   6
   1  13  14 1638.67 370.075   2
  -1  13  14 1750.23 378.154   6
   1  13  14 1726.36 366.025   6
   1  13  15 4914.86 594.902   6
  -1  13  15 5406.21 662.824   6
   1  13  15 3940.14 503.143   2
   1  13  16 8963.29 793.126   6
   1  13  16 9517.53 728.741   2
  -1  13  16 9505.90 728.591   2
  -1  13  16 8197.62 775.659   6
   1  13  17 1577.91 336.734   2
  -1  13  17 1143.24 272.709   2
  -1  13  18 133.542 149.630   2
   1  13  18 49.5205 140.685   2
  -1  13  19 1306.58 239.835   2
   1  13  19 1213.03 242.441   2
  -1  13  20 43.8498 106.007   2
   1  13  20 62.1404 97.9038   2
  -1 -15   0 2176.44 263.298   1
   1 -15   0 2331.54 248.996   1
   1 -15   1 102368. 1630.88   1
  -1 -15  -1 106193. 1663.78   1
   1 -15  -2 369.678 135.267   1
  -1 -15  -2 146.897 89.3716   1
   1 -15   2 443.678 151.695   1
  -1 -15  -3 86.3324 80.0821   1
   1 -15  -3 104.058 83.6373   1
  -1 -15  -4 6610.13 386.466   1
   1 -15  -4 5746.75 346.386   1
  -1 -15  -5 29049.7 807.936   1
   1 -15  -5 28419.4 761.909   1
  -1 -15  -6 7705.14 434.603   1
   1 -15  -6 7795.29 424.628   1
   1 -15  -7 1016.72 162.891   1
  -1 -15  -7 1200.10 184.161   1
   1 -15  -8 15381.3 649.889   1
   1  15   8 17207.0 841.061   6
  -1  15   8 16418.4 825.446   6
  -1 -15  -8 15839.7 678.575   1
  -1  15   9 4716.13 465.934   6
   1  15   9 5109.86 487.838   6
   1 -15  -9 4144.04 383.657   1
  -1 -15  -9 5259.43 422.284   1
   1 -15 -10 64807.4 1547.73   1
   1  15  10 62289.4 1767.38   6
  -1  15  10 62436.4 1770.94   6
  -1  15  11 1041.98 290.708   6
   1  15  11 940.154 256.510   6
   1  15 -11 963.165 209.653   1
   1 -15 -11 1035.34 243.292   1
   1  15  12 8206.08 700.772   6
  -1  15  12 8507.79 741.354   6
   1  15  13 79.6649 170.159   6
  -1  15  13 260.431 228.394   6
  -1  15  14 1046.45 309.774   6
   1  15  14 491.942 231.719   2
   1  15  14 1438.85 367.235   6
   1  15  15 2692.84 435.193   2
   1  15  15 3418.41 491.262   6
  -1  15  15 2994.42 473.909   6
  -1  15  16 1848.04 330.714   2
   1  15  16 2196.85 373.225   2
   1  15  16 1995.61 430.083   6
  -1  15  16 2344.37 420.774   6
  -1  15  17 329.113 199.851   2
   1  15  17 197.003 120.502   2
   1  15  18 1093.13 255.374   2
  -1  15  18 1454.59 287.468   2
  -1  15  19 7572.98 565.980   2
   1  15  19 7418.33 573.126   2
   1  15  20 1270.59 229.089   2
  -1  15  20 1395.36 237.964   2
  -1 -17   0 2628.02 306.012   1
   1 -17   0 3090.55 301.833   1
   1 -17   1 56945.3 1326.83   1
  -1 -17  -1 56363.4 1268.54   1
   1 -17  -1 58909.2 1213.04   1
  -1 -17  -2 2983.28 305.711   1
   1 -17  -2 3176.84 294.844   1
   1 -17  -3 680.678 160.786   1
  -1 -17  -3 623.258 152.088   1
  -1 -17  -4 1811.78 231.497   1
   1 -17  -4 1613.74 203.774   1
   1 -17  -5 625.736 137.945   1
  -1 -17  -5 466.544 121.230   1
  -1 -17  -6 318.977 143.432   1
   1 -17  -6 405.134 119.655   1
  -1  17   7 1811.03 274.521   6
   1 -17  -7 1570.44 219.350   1
  -1 -17  -7 1561.73 217.937   1
   1  17   7 1606.99 284.432   6
   1 -17  -8 35773.8 1068.21   1
  -1 -17  -8 36944.3 1140.34   1
  -1  17   8 36698.4 1249.20   6
   1  17   8 36518.7 1252.54   6
  -1 -17  -9 11082.0 660.134   1
   1 -17  -9 10433.6 623.354   1
   1  17   9 10049.3 689.631   6
  -1  17   9 10268.6 689.019   6
  -1  17  10 85568.5 2104.60   6
   1  17  10 87375.4 2136.42   6
   1 -17 -10 89564.3 1941.94   1
   1  17  11 1532.86 328.079   6
  -1  17  11 725.780 246.142   6
   1 -17 -11 843.795 252.928   1
   1  17  12 13694.8 934.500   6
  -1  17  12 13126.1 916.840   6
   1  17  13 38.6165 156.726   6
  -1  17  13 245.063 269.932   6
  -1  17  14 1307.21 356.644   6
   1  17  14 1316.68 267.252   2
   1  17  14 1187.17 304.244   6
   1  17  15 1963.42 391.240   6
  -1  17  15 1557.94 333.467   6
   1  17  15 1598.04 309.298   2
  -1  17  16 786.027 278.413   6
   1  17  16 979.717 272.790   2
  -1  17  16 1087.56 282.897   2
   1  17  16 1272.13 340.427   6
  -1  17  17 308.601 267.989   6
  -1  17  17 129.158 179.685   2
   1  17  17 151.565 144.408   2
   1  17  18 2354.93 350.467   2
  -1  17  18 2526.19 342.829   2
  -1  17  19 14413.3 762.894   2
   1  17  19 15032.8 770.925   2
   1 -19   0 3614.43 377.860   1
  -1 -19   0 4087.23 401.706   1
  -1 -19  -1 55547.4 1384.54   1
   1 -19  -1 59238.1 1332.10   1
   1 -19   1 56971.7 1410.77   1
   1 -19  -2 3.01526 118.750   1
  -1 -19  -2 328.893 154.365   1
   1 -19  -3 3646.39 336.231   1
  -1 -19  -3 3423.71 327.207   1
   1 -19  -4 510.521 164.382   1
  -1 -19  -4 477.994 146.635   1
  -1 -19  -5 2699.96 300.102   1
   1 -19  -5 2958.97 306.741   1
  -1  19   6 4187.63 406.144   6
   1 -19  -6 3870.86 346.320   1
   1  19   6 4429.44 422.525   6
  -1 -19  -6 4794.75 412.697   1
  -1 -19  -7 966.268 193.616   1
   1  19   7 991.500 234.591   6
   1 -19  -7 1030.03 204.361   1
  -1  19   7 821.947 218.041   6
   1 -19  -8 24635.7 959.763   1
   1  19   8 24329.1 1037.74   6
  -1 -19  -8 25868.1 1033.06   1
  -1  19   8 24068.5 1045.35   6
   1 -19  -9 6800.34 548.594   1
  -1  19   9 6729.85 587.001   6
  -1 -19  -9 7955.03 603.350   1
   1  19   9 7089.62 599.548   6
   1 -19 -10 62293.2 1751.71   1
   1  19  10 62398.5 1827.89   6
  -1  19  10 62628.8 1836.89   6
   1  19  11 612.598 248.986   6
  -1  19  11 613.395 222.005   6
   1  19  12 10147.2 789.741   6
  -1  19  12 10197.1 808.236   6
  -1  19  13-2.42206 141.788   6
   1  19  13-5.63911 205.150   6
  -1  19  14 808.466 360.987   6
   1  19  14 1227.75 279.857   2
   1  19  14 1104.55 330.389   6
  -1  19  15 1436.64 352.460   6
   1  19  15 1747.57 370.251   6
   1  19  15 1654.81 307.893   2
   1  19  16 2455.67 423.635   6
  -1  19  16 2187.18 346.050   2
  -1  19  16 2521.77 427.372   6
   1  19  16 2801.22 398.983   2
  -1  19  17 218.979 186.694   6
  -1  19  17 153.661 144.009   2
   1  19  17-250.857 179.888   2
   1  19  18 1322.01 262.808   2
  -1  19  18 1734.11 296.244   2
  -1  19  19 10897.6 625.465   2
   1  19  19 10672.8 622.843   2
   1 -21   0 4495.54 457.146   1
   1 -21  -1 74010.8 1668.94   1
  -1 -21  -1 73931.6 1698.96   1
   1 -21   1 70077.9 1671.20   1
   1 -21  -2 532.094 162.758   1
  -1 -21  -2 3203.82 323.046   1
   1 -21  -3 24427.7 912.746   1
  -1 -21  -3 28355.0 988.109   1
  -1  21   4 7397.58 535.784   6
   1  21   4 6538.57 479.804   4
   1 -21  -4 8079.32 538.509   1
  -1 -21  -4 7788.33 533.087   1
   1  21   5 11340.4 649.473   6
  -1 -21  -5 12233.9 669.278   1
   1 -21  -5 12366.3 661.252   1
  -1  21   5 11637.3 691.833   6
  -1  21   6 15773.5 806.204   6
   1 -21  -6 17287.2 802.945   1
  -1 -21  -6 17356.6 820.016   1
   1  21   6 15991.7 785.232   6
   1  21   7 3904.79 422.080   6
  -1  21   7 4104.50 418.526   6
   1 -21  -7 3911.03 402.440   1
  -1 -21  -7 3987.67 410.824   1
   1  21   8 4348.53 459.902   6
  -1  21   8 4220.55 453.586   6
  -1 -21  -8 4685.48 479.472   1
   1 -21  -8 4593.39 452.970   1
  -1  21   9 1230.69 265.797   6
   1 -21  -9 1558.27 283.405   1
   1  21   9 1120.84 270.966   6
  -1 -21  -9 1436.21 258.562   1
   1 -21 -10 18132.8 1025.68   1
  -1  21  10 17940.3 1007.22   6
   1  21  10 19043.2 1026.43   6
   1  21  11 488.287 250.390   6
  -1  21  11 808.067 302.743   6
   1  21  12 4436.80 541.391   6
  -1  21  12 4347.37 573.303   6
   1  21  13 196.486 217.116   6
  -1  21  13-13.3213 164.869   6
  -1  21  14 4560.42 587.906   6
   1  21  14 4926.35 587.041   6
   1  21  14 5595.00 555.842   2
  -1  21  15 5979.74 572.801   2
   1  21  15 5762.68 615.129   6
   1  21  15 5471.10 555.304   2
  -1  21  15 5262.94 615.159   6
  -1  21  16 4778.54 568.353   6
   1  21  16 4817.98 559.720   6
  -1  21  16 5090.74 507.431   2
   1  21  16 5169.44 508.480   2
  -1  21  17 635.719 233.220   6
   1  21  17 618.256 214.507   2
   1  21  17 659.849 218.284   6
  -1  21  17 521.689 271.975   2
  -1  21  18 268.478 158.752   2
   1  21  18 515.136 184.935   2
  -1  21  19 3279.42 338.122   2
   1 -23   0 3829.58 453.486   1
  -1  23   1 43540.3 1288.71   4
   1  23   1 45837.8 1266.03   4
   1 -23  -1 44730.8 1446.09   1
  -1  23   2 180.288 110.229   4
   1  23   2-4.67137 112.057   4
  -1 -23  -2 28.8203 121.392   1
   1 -23  -2 48.7068 139.837   1
   1 -23  -3 48995.6 1399.04   1
   1  23   3 48407.1 1336.03   4
  -1 -23  -3 47062.0 1470.81   1
  -1  23   3 48255.5 1439.12   6
   1  23   3 46228.9 1327.91   6
  -1  23   4 44656.8 1385.81   6
   1  23   4 43524.1 1311.02   6
   1 -23  -4 45049.1 1340.57   1
   1  23   4 43660.0 1291.49   4
  -1  23   5 68390.0 1720.74   6
  -1 -23  -5 70964.2 1782.89   1
   1 -23  -5 68603.6 1669.54   1
   1  23   5 69347.4 1661.98   6
   1  23   6 38541.6 1287.71   6
  -1  23   6 39269.4 1309.52   6
  -1 -23  -6 40924.3 1370.28   1
   1 -23  -6 40309.0 1337.68   1
  -1  23   7 11748.3 735.468   6
  -1 -23  -7 12850.0 803.609   1
   1 -23  -7 12425.4 767.923   1
   1  23   7 12252.8 739.743   6
  -1 -23  -8 2892.78 427.549   1
   1 -23  -8 3243.69 416.607   1
  -1  23   8 3273.93 408.562   6
   1  23   8 3286.62 401.799   6
   1 -23  -9 1378.13 278.346   1
  -1  23   9 1458.93 327.267   6
  -1 -23  -9 1322.02 322.722   1
   1  23   9 1210.72 269.857   6
   1 -23 -10 5947.30 606.844   1
   1  23  10 6137.75 603.373   6
  -1  23  10 6224.74 608.673   6
   1  23  11-122.429 176.051   6
  -1  23  11-33.8543 182.119   6
   1  23  12 1140.33 309.207   6
  -1  23  12 868.290 284.354   6
   1  23  13 1144.63 346.952   2
   1  23  13 824.999 263.399   6
  -1  23  13 437.068 265.503   6
   1  23  14 11878.3 885.068   6
  -1  23  14 11678.9 871.851   6
   1  23  14 12900.6 836.798   2
   1  23  15 5488.67 547.331   2
   1  23  15 5843.21 621.706   6
  -1  23  15 5301.67 537.242   2
  -1  23  15 5389.97 601.490   6
  -1  23  16 10383.8 699.445   2
   1  23  16 9694.20 755.648   6
  -1  23  16 9845.99 793.307   6
   1  23  16 10007.8 694.127   2
   1  23  17 3693.29 413.367   2
  -1  23  17 3035.27 403.569   6
  -1  23  17 3082.78 365.454   2
   1  23  17 3129.89 416.874   6
   1  23  18 325.979 191.816   2
  -1  23  18 716.458 178.674   2
  -1  25   0 1449.56 278.038   4
   1  25   0 1492.98 246.510   4
   1 -25   0 1461.28 306.301   1
   1  25  -1 17673.6 841.560   4
  -1  25   1 16802.8 862.329   4
  -1  25  -1 17006.1 854.068   4
   1 -25  -1 17497.2 976.137   1
   1  25   2 308.600 139.646   4
   1  25   2 367.902 175.817   6
  -1 -25  -2 232.569 130.945   1
  -1  25  -2 215.537 85.0298   4
   1 -25  -2 112.861 146.209   1
   1  25  -2 361.836 153.007   4
  -1  25   3 38555.0 1305.50   6
   1  25   3 37164.8 1229.25   4
  -1 -25  -3 38054.6 1427.78   1
   1  25   3 38620.0 1261.82   6
   1  25  -3 36684.5 1207.59   4
   1 -25  -3 41092.2 1373.97   1
   1 -25  -4 42194.0 1412.87   1
   1  25  -4 40546.1 1233.11   4
   1  25   4 41312.4 1335.07   6
  -1 -25  -4 38822.9 1473.88   1
  -1  25   4 40663.0 1374.90   6
   1  25   4 40933.9 1298.47   4
   1  25   5 97266.3 2027.91   6
   1 -25  -5 98231.8 2151.88   1
  -1  25   5 101475. 2139.09   6
   1  25   6 63824.1 1699.48   6
  -1  25   6 63682.0 1742.49   6
   1 -25  -6 65573.3 1802.05   1
   1 -25  -7 17211.9 961.511   1
  -1 -25  -7 20284.4 1081.69   1
   1  25   7 17567.3 913.602   6
  -1  25   7 18466.0 956.673   6
   1 -25  -8 2500.85 381.998   1
   1  25   8 2655.45 396.706   6
  -1  25   8 3337.06 441.274   6
  -1 -25  -8 2784.72 443.983   1
   1  25   9 206.015 165.347   6
  -1  25   9-115.875 184.659   6
   1 -25  -9 38.8813 118.510   1
  -1  25  10 3213.95 468.381   6
   1 -25 -10 3181.09 535.213   1
   1  25  10 3214.25 460.329   6
   1  25  11 3.27968 139.005   6
  -1  25  11-30.5901 192.485   6
   1  25  12 8260.71 666.067   2
  -1  25  12 7735.84 780.122   6
   1  25  12 8047.90 726.739   6
  -1  25  13 1174.24 342.334   6
   1  25  13 1081.95 313.447   6
   1  25  13 1142.36 281.546   2
   1  25  14 11085.2 778.509   2
  -1  25  14 11664.6 786.288   2
   1  25  14 11087.6 829.717   6
  -1  25  14 10977.3 857.726   6
   1  25  15 9713.24 768.167   6
  -1  25  15 9965.66 699.351   2
  -1  25  15 9069.89 755.810   6
   1  25  15 9565.57 695.008   2
   1  25  16 16479.5 869.284   2
  -1  25  16 17243.1 885.269   2
   1  25  16 16880.9 963.294   6
  -1  25  16 15377.1 942.480   6
   1  25  17 5822.83 533.067   6
  -1  25  17 5486.81 527.110   6
  -1  25  17 5286.47 448.932   2
   1  25  17 5018.69 458.391   2
   1  27   0 821.441 209.976   4
  -1  27   0 964.540 248.787   4
   1  27  -1 1825.11 292.528   4
  -1  27   1 1563.88 290.827   4
   1 -27  -1 2011.89 367.196   1
  -1  27  -1 1708.42 313.006   4
   1  27   1 1403.73 248.139   4
   1 -27  -2 1352.99 286.639   1
   1  27   2 1801.70 325.607   6
   1  27   2 1555.94 253.124   4
   1  27  -2 1652.46 278.247   4
  -1  27  -2 1708.47 302.198   4
   1  27   3 29247.1 1140.67   4
   1  27  -3 29524.1 1136.34   4
  -1  27   3 32568.4 1238.41   6
   1 -27  -3 27752.0 1306.42   1
   1  27   3 30833.5 1168.53   6
  -1 -27  -3 31081.7 1348.39   1
   1  27  -4 25583.8 1041.61   4
  -1  27   4 26298.6 1154.31   6
  -1 -27  -4 27151.2 1299.94   1
   1 -27  -4 28797.0 1257.36   1
   1  27   4 25998.0 1089.13   6
   1  27   5 64170.9 1694.04   6
  -1 -27  -5 61960.5 2020.41   1
   1 -27  -5 64728.1 1905.38   1
  -1  27   5 65920.8 1777.02   6
   1  27   6 52561.0 1577.59   6
   1 -27  -6 53655.1 1743.02   1
  -1 -27  -6 51989.6 1902.25   1
  -1  27   6 54924.0 1648.05   6
  -1  27   7 7147.09 617.943   6
  -1 -27  -7 5899.43 643.866   1
   1 -27  -7 6017.11 624.510   1
   1  27   7 6402.52 583.535   6
   1  27   8 343.240 196.912   6
  -1  27   8 77.1638 159.252   6
   1 -27  -8 76.8448 150.928   1
  -1 -27  -8-37.6114 216.767   1
   1 -27  -9-24.7442 142.429   1
  -1  27   9-3.49749 138.385   6
   1  27  10 7408.70 669.447   6
  -1  27  10 7164.25 711.450   6
   1  27  11 151.074 156.108   6
  -1  27  11 17.2193 147.343   6
   1  27  12 8685.49 668.539   2
   1  27  12 8245.75 719.294   6
  -1  27  12 7931.12 756.527   6
   1  27  13 1569.08 281.957   2
  -1  27  13 1260.15 334.963   6
   1  27  13 1246.11 325.827   6
   1  27  14 17485.5 944.455   2
  -1  27  14 18321.0 960.723   2
  -1  27  14 16331.7 1010.56   6
   1  27  14 16448.1 992.032   6
   1  27  15 11281.9 728.229   2
  -1  27  15 10784.2 807.438   6
  -1  27  15 10860.9 724.924   2
   1  27  15 10512.8 772.119   6
   1  27  16 14326.6 853.592   6
   1  27  16 13290.6 747.809   2
  -1  27  16 13990.5 754.700   2
  -1  27  16 14134.9 863.880   6
  -1  27  17 2951.06 330.770   2
  -1  27  17 2964.75 397.325   6
   1  27  17 2472.20 304.739   2
  -1  29   0 712.992 205.447   4
   1  29   0 870.331 223.532   4
  -1  29  -1 9150.78 705.229   4
   1  29   1 9944.17 704.582   4
   1  29  -1 10588.6 718.207   4
  -1  29   2 106.683 169.891   6
   1  29   2 44.4046 123.865   6
  -1  29  -2 47.3435 134.655   4
   1  29  -2-9.97309 113.167   4
   1  29   2-60.7903 115.945   4
   1 -29  -2-233.151 189.130   1
  -1  29   3 15025.1 877.523   6
   1 -29  -3 13352.6 955.673   1
   1  29   3 14516.7 851.379   6
   1  29   3 15048.1 860.201   4
   1  29  -3 15992.5 859.370   4
   1  29   4 14035.5 822.765   6
  -1  29   4 14612.8 860.132   6
   1 -29  -4 13560.2 994.556   1
  -1 -29  -4 15390.6 1019.04   1
   1  29  -4 15409.5 821.465   4
  -1  29   5 25712.5 1144.82   6
  -1 -29  -5 24533.6 1307.83   1
   1  29   5 23719.4 1062.91   6
  -1 -29  -6 8535.48 804.931   1
   1 -29  -6 8680.19 779.054   1
   1  29   6 8339.49 644.786   6
  -1  29   6 8287.17 671.172   6
  -1  29   7 2919.37 409.848   6
  -1 -29  -7 2614.33 481.101   1
   1 -29  -7 2189.95 451.796   1
   1  29   7 2864.11 401.045   6
   1 -29  -8-50.4852 167.429   1
  -1 -29  -8-118.231 156.452   1
  -1  29   8-187.558 207.181   6
   1  29   8 66.2136 156.382   6
   1  29   9 2500.17 397.464   6
  -1  29   9 2665.78 445.858   6
   1 -29  -9 3417.33 613.920   1
  -1  29  10 16991.6 1038.98   6
   1  29  10 17118.4 1003.00   6
  -1  29  11 351.713 286.190   6
   1  29  11 282.049 204.025   6
  -1  29  12 327.233 209.513   6
   1  29  12 765.557 284.048   6
   1  29  13 1402.75 320.526   6
  -1  29  13 1976.66 333.689   2
  -1  29  13 1777.32 340.031   6
  -1  29  14 22334.7 1012.62   2
  -1  29  14 21565.3 1121.64   6
   1  29  14 21659.8 1097.04   6
  -1  29  15 5513.04 474.546   2
   1  29  15 5940.15 572.017   6
  -1  29  15 6707.57 620.799   6
  -1  29  16 4368.40 391.925   2
   1  29  16 5214.36 487.168   6
  -1  29  16 5193.96 502.256   6
  -1  29  17 648.845 182.279   6
   1  31   0 4074.02 478.514   4
   1  31   1 31852.1 1276.59   6
   1  31   1 33323.1 1330.18   4
   1  31  -1 33536.5 1312.67   4
   1  31   2 540.201 161.956   6
  -1  31   2 508.950 254.320   6
   1  31  -2 791.706 238.785   4
   1  31   2 609.664 216.576   4
  -1  31  -2 773.905 228.219   4
  -1  31   3 2028.71 360.364   6
   1  31  -3 2046.66 321.254   4
   1 -31  -3 2180.25 408.441   1
   1  31   3 1892.54 329.431   6
   1  31   4 669.107 215.174   6
   1  31  -4 891.160 227.709   4
  -1  31   4 534.628 218.113   6
   1 -31  -4 693.356 275.608   1
   1  31   5 224.359 153.221   6
  -1  31   5 396.399 197.355   6
   1 -31  -5 221.398 243.463   1
  -1  31   6 4538.31 541.931   6
   1 -31  -6 4647.28 614.757   1
   1  31   6 5953.33 558.087   6
   1 -31  -7 1524.57 395.045   1
   1  31   7 2103.11 367.571   6
  -1 -31  -7 1770.09 448.067   1
  -1  31   7 1892.10 383.773   6
   1 -31  -8 3474.16 564.518   1
  -1  31   8 5098.76 571.226   6
   1  31   8 5028.47 533.712   6
  -1  31   9 5230.15 591.675   6
   1  31   9 5376.09 571.035   6
  -1  31  10 40073.6 1579.39   6
   1  31  10 39836.9 1530.73   6
  -1  31  11 2245.73 410.387   6
   1  31  11 2035.78 404.208   6
   1  31  12 4497.24 507.446   6
  -1  31  12 4628.87 530.760   6
   1  31  13-106.156 158.431   6
  -1  31  13 26.7924 131.130   6
  -1  31  14 5347.96 548.237   6
   1  31  14 5516.43 541.928   6
  -1  31  15 3326.84 413.980   6
   1  31  15 3679.90 430.363   6
  -1  31  16 1028.53 210.137   6
   1  31  16 1244.06 237.503   6
   1  33   0 8180.03 691.317   4
   1  33  -1 72889.1 2002.81   4
   1  33   1 73085.0 1989.28   6
   1  33   1 75066.3 2022.71   4
  -1  33   1 69163.6 2000.84   6
   1  33  -2 3499.38 438.126   4
   1  33   2 3109.48 446.222   6
  -1  33   2 3310.17 458.818   6
   1  33   3 10204.2 737.095   6
   1  33  -3 10348.0 705.155   4
  -1  33   3 9886.38 757.384   6
   1  33   4 1261.20 296.868   6
  -1  33   4 1166.32 365.777   6
   1  33  -4 1449.42 260.929   4
   1  33   5 3223.92 419.159   6
  -1  33   5 3596.10 462.525   6
   1 -33  -5 2912.57 487.555   1
  -1  33   6 8340.97 696.978   6
   1 -33  -6 6668.59 755.705   1
   1  33   6 8376.79 684.379   6
   1  33   7 325.299 198.659   6
  -1  33   7 285.802 210.352   6
   1  33   8 10830.0 787.079   6
  -1  33   8 10732.7 815.446   6
  -1  33   9 8150.52 717.178   6
   1  33   9 8635.55 717.023   6
   1  33  10 60385.3 1858.00   6
  -1  33  10 62095.9 1937.01   6
  -1  33  11 3595.36 494.765   6
   1  33  11 3421.07 468.797   6
  -1  33  12 14942.8 930.631   6
   1  33  12 14862.1 900.913   6
   1  33  13 524.925 210.056   6
  -1  33  13 526.919 247.941   6
  -1  33  14 69.6213 113.230   6
   1  33  14-58.9570 134.413   6
  -1  33  15 455.037 166.762   6
   1  33  15 398.459 140.681   6
   1  35   0 10617.2 801.795   6
  -1  35   0 11583.5 860.946   6
   1  35   1 81728.1 2135.83   6
  -1  35   1 83836.7 2193.29   6
   1  35  -1 84704.8 2168.37   4
  -1  35   2 11101.3 819.699   6
   1  35   2 11037.8 794.770   6
   1  35  -2 12560.8 835.755   4
   1  35  -3 17227.7 921.912   4
  -1  35   3 20430.7 1099.82   6
   1  35   3 20656.1 1066.79   6
  -1  35   4 417.209 224.166   6
   1  35   4 238.277 158.385   6
  -1  35   5 8429.09 703.678   6
   1  35   5 8739.79 692.135   6
  -1  35   6 5590.27 577.607   6
   1  35   6 5047.10 529.495   6
   1  35   7 222.677 146.890   6
  -1  35   7 182.434 180.819   6
   1  35   8 12477.2 853.065   6
  -1  35   8 13101.0 895.036   6
   1  35   9 7380.77 641.545   6
  -1  35   9 7462.68 693.412   6
   1  35  10 48092.0 1644.48   6
  -1  35  10 49031.2 1693.04   6
  -1  35  11 4601.64 531.843   6
   1  35  11 4394.89 507.386   6
  -1  35  12 19197.6 1011.37   6
   1  35  12 18789.3 976.039   6
   1  35  13 557.903 184.427   6
  -1  35  13 708.472 209.722   6
  -1  35  14 672.500 202.500   6
   1  35  14 616.912 171.978   6
  -1  37   0 7556.52 690.321   6
   1  37   0 8317.88 708.642   6
   1  37  -1 84243.2 2216.70   6
  -1  37   1 82570.6 2184.04   6
   1  37   1 82462.5 2180.67   6
   1  37   2 4587.21 529.571   6
  -1  37   2 4535.86 538.290   6
   1  37   3 417.108 175.759   6
  -1  37   3 605.018 230.953   6
   1  37   4 2613.89 390.641   6
  -1  37   4 3213.92 475.028   6
  -1  37   5 4090.83 486.380   6
   1  37   5 4282.37 491.431   6
   1  37   6 2903.44 412.034   6
  -1  37   6 3199.56 451.150   6
  -1  37   7 278.851 186.333   6
   1  37   7 183.178 172.236   6
   1  37   8 6897.19 624.563   6
  -1  37   8 6678.36 618.458   6
  -1  37   9 4232.16 491.867   6
   1  37   9 4521.21 499.031   6
   1  37  10 31508.5 1290.63   6
  -1  37  10 32227.1 1329.98   6
  -1  37  11 2900.52 410.602   6
   1  37  11 2770.90 416.274   6
  -1  37  12 8312.72 637.823   6
   1  37  12 8657.66 636.377   6
   1  37  13 176.699 111.438   6
  -1  37  13 136.509 135.633   6
  -1  37  14 248.013 138.538   6
   1  39   0 6813.36 647.929   6
  -1  39   0 6654.18 652.033   6
  -1  39   1 31062.3 1331.89   6
   1  39  -1 31673.0 1349.63   6
  -1  39  -1 30774.8 1323.89   6
   1  39   1 31549.6 1344.69   6
   1  39  -2 91.7605 135.711   6
  -1  39  -2 135.849 143.004   6
   1  39   2 20.0775 144.330   6
  -1  39   2 176.833 147.048   6
  -1  39   3 7676.54 676.860   6
   1  39   3 8063.94 657.604   6
  -1  39   4 6093.49 605.131   6
   1  39   4 6804.86 633.052   6
   1  39   5 11492.6 789.174   6
  -1  39   5 11508.4 801.546   6
  -1  39   6 4802.29 534.123   6
   1  39   6 4362.78 493.370   6
  -1  39   7 531.204 223.658   6
   1  39   7 365.515 146.999   6
   1  39   8 1695.32 302.349   6
  -1  39   8 1908.12 337.651   6
  -1  39   9 2220.84 341.419   6
   1  39   9 2299.57 361.323   6
  -1  39  10 10537.2 718.915   6
   1  39  10 11101.4 729.662   6
  -1  39  11 776.764 213.765   6
   1  39  11 640.142 178.236   6
  -1  39  12 904.820 206.796   6
   1  39  12 681.156 173.842   6
  -1  41   0 1320.85 288.769   6
   1  41   0 1338.59 297.014   6
   1  41  -1 3020.90 413.198   6
   1  41   1 3255.38 419.226   6
  -1  41  -1 2882.55 433.051   6
  -1  41   1 2949.16 407.167   6
  -1  41   2 529.980 173.577   6
  -1  41  -2 476.302 188.776   6
   1  41  -2 852.365 318.017   6
   1  41   2 625.592 230.052   6
  -1  41   3 11847.8 808.110   6
  -1  41  -3 12480.0 825.090   6
   1  41  -3 13900.8 876.345   6
   1  41   3 12791.4 824.261   6
   1  41   4 10335.5 745.466   6
   1  41  -4 11733.4 779.633   6
  -1  41   4 10830.4 767.899   6
  -1  41   5 20193.7 1037.39   6
   1  41   5 21218.1 1053.60   6
   1  41   6 11424.6 773.353   6
  -1  41   6 10785.6 764.711   6
  -1  41   7 1197.51 258.838   6
   1  41   7 1002.21 243.923   6
   1  41   8 283.655 152.742   6
  -1  41   8 304.063 155.938   6
   1  41   9 373.055 159.777   6
  -1  41   9 513.600 195.870   6
   1  41  10 2286.22 317.495   6
  -1  41  10 2712.80 397.416   6
   1  41  11 164.690 86.4147   6
  -1  41  11 65.2847 109.237   6
   1  43   0-55.0021 148.583   6
  -1  43   0 34.3149 148.957   6
  -1  43  -1 367.310 175.558   6
   1  43   1 316.492 224.563   6
   1  43  -1 797.930 255.510   6
  -1  43   1 353.054 172.723   6
  -1  43  -2 300.390 156.722   6
  -1  43   2 716.841 232.803   6
   1  43  -2 797.908 251.337   6
   1  43   2 26.5969 116.762   6
   1  43  -3 13149.7 780.076   6
   1  43   3 13090.5 807.162   6
  -1  43  -3 12745.9 774.744   6
  -1  43   3 12621.5 785.509   6
  -1  43  -4 12063.7 758.216   6
  -1  43   4 11262.6 751.565   6
   1  43   4 11683.5 759.839   6
   1  43  -4 12550.6 751.774   6
  -1  43  -5 21672.9 985.628   6
   1  43   5 23880.9 1072.34   6
   1  43  -5 21362.2 938.255   6
  -1  43   5 23513.2 1067.77   6
   1  43  -6 13471.2 726.997   6
   1  43   6 15929.6 861.865   6
  -1  43   6 15385.3 847.710   6
  -1  43   7 3840.40 425.962   6
   1  43  -7 2493.81 306.283   6
   1  43   7 3707.04 411.311   6
  -1  43   8 254.200 114.392   6
   1  43   8 340.607 198.006   6
  -1  43   9 122.231 118.731   6
   1  43   9 15.4528 115.284   6
  -1  43  10 231.125 117.481   6
  -1  45   0 913.864 230.240   6
   1  45   0 703.658 222.099   6
   1  45   1 1880.23 294.803   6
   1  45  -1 1566.63 278.940   6
  -1  45  -1 1573.48 275.005   6
  -1  45   1 1737.79 275.959   6
  -1  45  -2 244.494 147.137   6
   1  45   2 378.165 157.645   6
  -1  45   2 415.035 184.314   6
   1  45  -2-0.57479 92.1267   6
   1  45   3 6594.26 544.362   6
  -1  45  -3 6632.72 542.767   6
   1  45  -3 5872.36 478.488   6
   1  45   4 6386.51 525.202   6
  -1  45  -4 7421.66 543.665   6
  -1  45   4 6730.18 542.891   6
   1  45  -4 5917.35 470.575   6
  -1  45   5 14568.8 790.190   6
  -1  45  -5 13081.1 695.185   6
   1  45   5 14178.1 775.331   6
  -1  45  -6 11243.9 625.270   6
   1  45   6 11053.2 665.800   6
   1  45   7 4128.36 402.792   6
  -1  45  -7 3414.50 333.920   6
  -1  45   7 4730.27 423.460   6
  -1  45   8 1209.95 220.549   6
  -1  47   0 1358.62 232.072   6
   1  47   1 4646.53 408.172   6
  -1  47   1 5916.94 469.492   6
  -1  47  -1 5635.59 444.931   6
   1  47   2-58.4232 115.921   6
  -1  47   2 225.211 150.942   6
   1  47   3 631.501 174.138   6
  -1  47   3 541.679 160.572   6
  -1  47  -3 357.593 139.124   6
  -1  47  -4 2720.94 296.959   6
   1  47   4 2221.31 281.965   6
  -1  47  -5 5000.47 391.178   6
  -1  47   5 6231.34 469.043   6
   2   0   0 103985. 461.491   1
   2   0  -1 7278.19 154.950   1
   2   0  -2 35058.5 406.080   1
  -2   0  -3 3794.67 83.3535   1
   2   0  -3 3817.60 155.166   1
   2   0  -4 5856.74 216.677   1
  -2   0  -4 6235.95 142.351   1
  -2   0  -5 2004.80 102.590   1
   2   0  -5 2016.55 146.937   1
   2   0  -6 363.889 86.2440   1
  -2   0  -6 360.529 66.2761   1
   2   0  -7 107.357 78.6174   1
  -2   0  -7 285.679 64.1606   1
   2   0  -8 7276.05 368.209   1
  -2   0  -8 7490.29 293.247   1
  -2   0  -9 62271.6 931.561   1
   2   0  -9 63254.0 1136.22   1
   2   0  10 1555.54 283.504   6
   2   0 -10 1335.16 184.492   1
   2   0  10 1791.83 275.439   2
  -2   0  10 1504.34 270.931   6
  -2   0  11 77041.0 1853.47   6
   2   0  11 82456.1 1792.66   2
   2   0 -11 82700.9 1507.42   1
  -2   0  12 976.885 240.231   6
   2   0 -12 1304.65 219.984   1
   2   0  12 1357.96 273.691   2
   2   0  13 25907.9 1166.27   2
   2   0  14 1840.18 350.965   2
  -2   0  15 542.486 202.235   2
   2   0  15 474.678 229.938   2
   2   0  16 1373.70 349.868   2
  -2   0  16 955.467 245.614   2
  -2   0  17 988.321 264.523   2
   2   0  17 724.229 230.848   2
   2   0  18 6912.75 632.209   2
  -2   0  18 6947.07 625.037   2
   2   0  19 899.432 237.822   2
  -2   0  19 824.789 244.966   2
   2   0  20 13191.6 789.145   2
  -2   0  20 10674.0 684.363   2
   2  -2   0 408694. 1041.07   1
   2  -2  -1 857.580 59.0045   1
   2  -2   1 902.197 50.9461   1
   2  -2  -2 30251.9 385.887   1
  -2  -2  -2 30350.7 266.762   1
   2  -2  -3 11447.2 267.499   1
  -2  -2  -3 11944.7 169.784   1
  -2  -2  -4 33360.4 345.221   1
   2  -2  -4 33907.6 511.836   1
  -2   2  -5 195.268 47.7040   1
   2  -2  -5 65.0162 57.3437   1
   2   2  -5 107.021 57.9030   1
  -2  -2  -5 157.607 38.9930   1
   2  -2  -6 2329.27 170.061   1
  -2   2  -6 2441.66 142.669   1
   2   2  -6 2579.29 185.831   1
  -2  -2  -6 2175.89 126.123   1
   2   2  -7 5781.93 319.496   1
  -2   2  -7 6586.00 258.175   1
  -2  -2  -7 6362.71 236.126   1
   2  -2  -7 6663.36 306.588   1
  -2  -2  -8 4187.09 219.678   1
   2  -2  -8 4324.56 269.188   1
   2   2  -8 4732.39 297.277   1
  -2   2  -8 4310.41 233.690   1
   2  -2  -9 80458.8 1260.23   1
  -2   2  -9 79833.3 1069.00   1
   2   2  -9 82779.9 1326.56   1
   2   2  10 2254.01 339.659   6
   2   2 -10 2016.62 228.948   1
   2  -2 -10 2005.69 225.903   1
   2  -2  10 1999.05 274.839   2
  -2   2  10 1785.87 295.609   6
  -2  -2  10 1803.02 265.672   6
  -2   2  11 36049.8 1276.23   6
   2  -2  11 39056.6 1267.00   2
   2   2  11 37320.1 1338.91   6
   2  -2 -11 38743.7 1035.36   1
   2   2 -11 38188.3 1050.60   1
   2   2  11 37408.2 1217.47   2
  -2   2  12 309.877 147.696   6
   2   2 -12 489.756 147.371   1
   2  -2  12 335.053 196.894   2
   2  -2 -12 567.867 168.560   1
   2   2  12 114.083 162.751   6
   2   2  12 381.588 164.571   2
  -2   2  13 4885.57 545.000   6
   2  -2  13 4656.90 488.557   2
   2   2  13 4959.87 502.646   2
  -2  -2  14 758.766 236.022   2
   2  -2  14 310.626 204.787   2
   2   2  14 298.713 185.201   2
   2   2  15 508.585 226.180   2
  -2  -2  15 576.409 245.447   2
   2  -2  15 689.541 243.471   2
   2  -2  16 137.896 157.471   2
  -2   2  16 127.013 142.125   2
  -2  -2  16 344.169 238.495   2
   2   2  16 144.009 214.095   2
  -2  -2  17 2295.77 361.362   2
   2   2  17 2138.21 377.927   2
   2  -2  17 2734.27 433.867   2
  -2   2  17 2821.05 424.138   2
   2  -2  18 2419.42 407.877   2
  -2   2  18 2314.08 365.319   2
  -2  -2  18 2350.31 391.849   2
   2   2  18 2052.86 379.527   2
   2   2  19 2613.19 389.649   2
  -2  -2  19 2517.81 394.709   2
  -2   2  19 2254.51 355.793   2
   2  -2  19 2858.71 410.893   2
   2  -2  20 2327.37 339.713   2
   2   2  20 3038.85 393.817   2
  -2   2  20 3101.47 380.405   2
  -2  -2  20 2192.57 316.367   2
   2  -4   0 52442.3 473.323   1
  -2  -4  -1 3853.40 168.588   1
   2  -4  -1 3437.04 130.917   1
   2  -4   1 3423.74 133.216   1
   2  -4   2 11750.2 278.896   1
   2  -4  -2 10883.4 242.797   1
  -2  -4  -2 11055.6 231.942   1
   2  -4  -3 496.382 70.8726   1
  -2  -4  -3 379.317 51.7323   1
   2  -4  -4 27002.2 450.353   1
  -2  -4  -4 25722.2 351.399   1
  -2  -4  -5 17981.9 329.300   1
   2  -4  -5 17937.6 412.065   1
  -2  -4  -6 1817.87 117.259   1
   2  -4  -6 2074.04 159.281   1
  -2   4  -7 467.320 79.4478   1
   2   4  -7 685.852 126.673   1
   2  -4  -7 638.850 105.134   1
  -2  -4  -7 651.145 81.6010   1
  -2   4  -8 11992.8 397.043   1
  -2  -4  -8 10940.2 360.479   1
   2  -4  -8 10767.1 421.655   1
   2   4  -8 11663.0 458.729   1
  -2   4  -9 29348.0 679.824   1
   2   4  -9 29810.3 811.563   1
   2  -4  -9 28616.1 757.678   1
  -2  -4  -9 27266.9 628.778   1
   2   4  10 899.601 241.346   6
   2   4 -10 691.957 151.074   1
   2  -4  10 866.868 203.560   2
  -2   4  10 803.266 194.311   6
   2  -4 -10 739.348 154.809   1
   2  -4  11 12708.1 730.775   2
   2   4 -11 12044.0 605.419   1
  -2   4  11 11856.5 736.727   6
   2   4  11 12004.3 756.470   6
   2  -4 -11 12353.4 584.243   1
   2  -4  12-45.5305 127.673   2
   2   4  12-17.4824 136.839   6
   2   4 -12 206.950 105.575   1
  -2   4  12 258.582 173.067   6
   2   4  12-69.9292 143.475   2
   2  -4 -12-6.70323 83.6473   1
   2  -4  13-5.46955 128.176   2
  -2   4  13 267.372 207.259   6
   2   4  13-12.5643 216.354   6
   2   4  13 28.7813 127.623   2
  -2   4  14 1393.46 324.996   6
   2   4  14 1238.10 275.605   2
   2  -4  14 1095.46 280.831   2
  -2  -4  14 697.287 198.442   2
  -2  -4  15 3752.43 473.974   2
   2   4  15 4442.97 518.721   2
   2  -4  15 3674.88 480.338   2
  -2   4  16 1757.82 327.725   2
   2   4  16 1529.61 339.535   2
  -2  -4  16 2027.86 341.562   2
   2  -4  16 1938.63 379.672   2
  -2   4  17 773.766 220.524   2
   2  -4  17 468.537 174.464   2
   2   4  17 892.767 257.904   2
  -2  -4  17 440.376 187.237   2
  -2   4  18 5088.31 546.983   2
   2  -4  18 3858.40 485.245   2
  -2  -4  18 4966.06 521.103   2
   2   4  18 4731.86 535.134   2
  -2  -4  19 408.863 193.797   2
  -2   4  19 412.355 224.626   2
   2   4  19 397.892 216.679   2
   2  -4  19 500.182 217.499   2
  -2   4  20 3153.67 379.784   2
   2   4  20 2966.80 379.028   2
   2  -4  20 2441.84 345.864   2
   2  -6   0 2785.45 139.772   1
   2  -6   1 748.565 85.2585   1
  -2  -6  -1 786.010 108.575   1
   2  -6  -1 606.045 69.1416   1
  -2  -6  -2 19260.1 379.856   1
   2  -6  -2 18912.4 359.428   1
   2  -6   2 18978.9 445.860   1
  -2  -6  -3 7259.47 231.767   1
   2  -6  -3 8341.06 250.512   1
  -2  -6  -4 16497.4 343.151   1
   2  -6  -4 17142.7 383.785   1
  -2  -6  -5 520.174 69.6910   1
   2  -6  -5 550.159 85.6589   1
  -2  -6  -6 15268.1 371.505   1
   2  -6  -6 15270.8 423.967   1
   2  -6  -7 4581.16 253.940   1
  -2  -6  -7 4515.31 224.768   1
   2  -6  -8 1156.48 149.234   1
  -2   6  -8 1082.24 127.137   1
  -2  -6  -8 1234.70 139.988   1
   2   6  -8 992.151 143.472   1
  -2  -6  -9 11043.8 421.510   1
   2   6  -9 11600.3 525.621   1
  -2   6  -9 11193.7 433.571   1
   2  -6  -9 10770.2 478.986   1
   2  -6 -10 347.701 117.548   1
   2   6  10 238.200 149.662   6
  -2   6  10 427.840 176.717   6
   2  -6  10 519.112 186.425   2
   2   6 -10 352.791 112.679   1
   2  -6  11 160.406 129.076   2
   2  -6 -11 176.160 93.3302   1
  -2   6  11 88.8922 116.316   6
   2   6  11 49.9389 131.428   6
   2   6 -11 130.820 82.0908   1
   2   6 -12 159.722 115.950   1
   2  -6 -12 188.971 97.5576   1
  -2   6  12 437.749 204.220   6
   2   6  12 286.860 160.832   6
   2  -6  12 472.137 189.151   2
  -2   6  13 8016.26 720.275   6
   2  -6  13 8055.38 646.896   2
  -2  -6  13 8336.54 615.409   2
   2   6  13 8729.84 641.339   2
   2   6  13 7793.80 684.806   6
   2  -6  14 2194.27 358.688   2
   2   6  14 2367.62 368.264   2
  -2  -6  14 2906.80 381.481   2
  -2   6  14 3202.68 488.062   6
   2   6  14 2748.29 446.001   6
  -2   6  15 22129.2 1224.59   6
  -2  -6  15 19923.3 1018.49   2
   2  -6  15 19823.7 1082.17   2
   2   6  15 22011.3 1116.25   2
   2  -6  16 10444.6 783.865   2
  -2  -6  16 11600.0 788.896   2
   2   6  16 10814.1 805.821   2
  -2   6  16 12436.7 836.074   2
   2   6  17 539.674 238.195   2
  -2  -6  17 239.376 187.766   2
  -2   6  17 486.449 204.350   2
   2  -6  17 294.094 174.650   2
  -2  -6  18 767.576 269.058   2
   2   6  18 705.284 283.424   2
   2  -6  18 429.558 192.881   2
  -2   6  18 438.561 200.944   2
   2   6  19 69.2737 129.172   2
  -2   6  19 21.2047 138.415   2
   2  -6  19 245.440 183.121   2
  -2   6  20 336.932 174.247   2
   2   6  20 375.463 144.602   2
   2  -6  20 348.228 171.259   2
   2  -8   0 187.721 66.8112   1
   2  -8   1 1101.25 123.925   1
   2  -8  -1 1101.56 105.872   1
  -2  -8  -1 1153.80 144.836   1
   2  -8  -2 39126.2 575.128   1
  -2  -8  -2 38115.2 632.021   1
   2  -8   2 37132.8 730.581   1
  -2  -8  -3 5780.85 249.443   1
   2  -8  -3 6387.45 244.559   1
  -2  -8  -4 146565. 1184.26   1
   2  -8  -4 145255. 1198.02   1
   2  -8  -5 14801.4 407.513   1
  -2  -8  -5 15226.0 395.976   1
   2  -8  -6 28533.0 605.158   1
  -2  -8  -6 27281.4 575.363   1
  -2  -8  -7 41225.5 741.970   1
   2  -8  -7 41582.1 794.872   1
  -2  -8  -8 4188.27 252.679   1
   2  -8  -8 3883.80 268.659   1
  -2   8   9 736.370 191.671   6
   2   8  -9 669.230 147.513   1
  -2  -8  -9 616.699 110.871   1
   2   8   9 840.823 224.225   6
   2  -8  -9 813.518 146.180   1
  -2   8  -9 710.917 122.759   1
   2   8 -10 87.2097 84.3253   1
   2  -8 -10 86.9943 69.6783   1
   2   8  10 77.1090 106.243   6
  -2   8  10 70.3718 140.153   6
   2  -8  10 119.639 123.448   2
  -2  -8  11 7542.39 536.619   2
  -2   8  11 9087.29 687.214   6
   2   8  11 9331.49 688.293   6
   2  -8 -11 10224.3 555.639   1
   2  -8  11 8526.47 620.535   2
   2   8 -11 9576.29 546.269   1
  -2   8  12-56.7203 129.686   6
   2   8  12 337.638 199.026   6
   2   8 -12 136.586 86.0389   1
   2  -8  12-13.3682 136.732   2
  -2  -8  12 183.181 112.929   2
   2  -8  13 24109.9 1108.11   2
   2   8  13 25038.5 1243.84   6
   2   8  13 22485.5 1045.93   2
  -2  -8  13 21915.6 1013.87   2
  -2   8  13 22241.7 1167.80   6
   2   8  14 5820.79 630.561   6
   2  -8  14 5519.19 568.117   2
  -2   8  14 6384.62 655.117   6
   2   8  14 5977.26 572.400   2
   2  -8  15 26874.7 1240.28   2
   2   8  15 31562.6 1340.21   2
  -2   8  15 29196.9 1426.91   6
  -2  -8  15 28532.9 1194.57   2
  -2   8  16 7136.56 642.521   2
   2  -8  16 6124.69 601.171   2
   2   8  16 7196.68 657.545   2
  -2   8  17 7663.11 659.179   2
   2  -8  17 6320.78 599.146   2
   2   8  17 6670.21 606.952   2
   2  -8  18 598.151 227.448   2
   2   8  18 255.215 190.813   2
  -2   8  18 596.577 238.466   2
   2  -8  19 85.9323 140.310   2
   2   8  19 14.2522 129.245   2
  -2   8  19 203.265 152.917   2
  -2   8  20 1068.54 255.204   2
   2   8  20 971.162 225.960   2
   2 -10   0 18288.3 474.059   1
   2 -10  -1 1381.92 139.801   1
  -2 -10  -1 1226.76 163.784   1
   2 -10   1 1296.88 152.982   1
  -2 -10  -2 768.802 118.839   1
   2 -10  -2 803.894 105.338   1
   2 -10   2 721.186 133.221   1
   2 -10  -3 5449.04 252.858   1
  -2 -10  -3 4959.83 264.595   1
  -2 -10  -4 50538.8 811.213   1
   2 -10  -4 51138.1 779.371   1
  -2 -10  -5 30839.9 637.741   1
   2 -10  -5 30196.3 631.148   1
  -2 -10  -6 22426.9 569.096   1
   2 -10  -6 23019.6 576.489   1
  -2 -10  -7 54590.7 937.556   1
   2 -10  -7 53461.6 943.418   1
  -2 -10  -8 6629.48 350.476   1
   2 -10  -8 6487.42 355.307   1
  -2 -10  -9 2915.48 254.681   1
  -2  10   9 3434.06 385.924   6
   2 -10  -9 2771.85 267.257   1
   2  10   9 3314.61 378.110   6
   2 -10  10 1465.63 245.348   2
   2  10  10 2307.50 320.034   6
   2 -10 -10 2340.44 255.280   1
  -2  10  10 2366.16 342.982   6
   2  10 -10 1919.27 241.950   1
   2 -10  11 297.552 138.482   2
   2  10  11 450.140 184.951   6
   2  10 -11 653.509 172.186   1
  -2  10  11 613.286 211.240   6
   2 -10 -11 688.732 172.587   1
   2 -10  12 68.1663 114.627   2
  -2  10  12-7.30298 143.184   6
   2  10 -12 208.887 143.060   1
   2 -10 -12 118.102 135.873   1
   2  10  12 62.6410 128.870   6
   2  10  13 10767.5 830.781   6
  -2  10  13 11188.4 850.211   6
   2  10  13 10457.7 727.735   2
   2 -10  13 11099.1 749.782   2
   2 -10  14 4709.86 510.876   2
   2  10  14 5284.04 622.826   6
   2  10  14 4867.42 527.041   2
  -2  10  14 5043.98 585.409   6
   2  10  15 12084.0 911.487   6
   2 -10  15 11868.6 815.289   2
  -2  10  15 11830.2 912.966   6
   2  10  15 12046.5 827.917   2
  -2  10  16 11782.5 911.761   6
   2  10  16 12517.0 868.651   2
   2 -10  16 11468.5 793.985   2
   2 -10  17 2942.38 415.956   2
   2  10  17 3963.70 495.479   2
  -2  10  17 3735.48 468.702   2
  -2  10  18 814.674 221.857   2
   2  10  18 1033.92 266.521   2
  -2  10  19 283.923 175.205   2
   2  10  19 203.250 173.470   2
   2  10  20 238.769 152.586   2
  -2  10  20 23.8377 116.931   2
   2 -12   0 21813.5 597.159   1
   2 -12  -1 3353.90 238.784   1
   2 -12   1 4046.44 273.787   1
  -2 -12  -1 4196.48 289.933   1
   2 -12   2 30.5546 108.611   1
  -2 -12  -2 71.1084 77.2008   1
   2 -12  -2 136.939 71.6725   1
   2 -12  -3 1219.61 143.763   1
  -2 -12  -3 1264.71 160.915   1
  -2 -12  -4 23498.9 624.872   1
   2 -12  -4 23625.5 581.384   1
   2 -12  -5 11720.0 419.375   1
  -2 -12  -5 11498.8 443.653   1
  -2 -12  -6 78590.2 1182.37   1
   2 -12  -6 75507.2 1122.33   1
   2 -12  -7 18087.1 582.567   1
  -2 -12  -7 18774.7 608.383   1
   2 -12  -8 1842.21 209.815   1
  -2 -12  -8 1836.47 204.707   1
  -2  12   8 2238.62 302.015   6
  -2 -12  -9 287.336 105.306   1
  -2  12   9 413.069 166.650   6
   2 -12  -9 281.006 114.205   1
   2  12   9 428.860 161.411   6
  -2  12  10 4768.32 501.099   6
   2  12  10 4645.58 483.820   6
   2 -12  10 3105.06 331.979   2
   2  12 -10 3947.23 356.918   1
   2 -12 -10 4309.33 362.050   1
  -2  12  11 426.396 187.562   6
   2  12  11 259.846 161.062   6
   2  12 -11 268.701 114.184   1
   2 -12  11 398.551 161.262   2
   2 -12 -11 358.848 127.574   1
   2  12 -12 94.1112 90.4556   1
   2 -12 -12 342.857 216.038   1
  -2  12  12 175.886 161.368   6
   2 -12  12 158.020 170.776   2
   2  12  12 4.98630 139.828   6
   2 -12  13 3387.62 416.245   2
   2  12  13 4047.28 521.874   6
  -2  12  13 3622.39 498.190   6
   2  12  13 3720.84 440.977   2
   2  12  14 475.574 241.475   6
  -2  12  14 291.613 262.805   6
   2  12  14 46.6594 138.606   2
   2 -12  14 137.994 146.164   2
   2  12  15 10911.5 868.923   6
  -2  12  15 10055.7 851.539   6
   2 -12  15 8723.63 696.778   2
  -2  12  16 3238.26 500.563   6
   2  12  16 3376.18 451.879   2
  -2  12  17 817.226 216.826   2
   2  12  17 950.533 285.923   2
   2  12  18 1405.62 300.299   2
  -2  12  18 1303.59 299.916   2
  -2  12  19 109.166 119.593   2
   2  12  19-121.521 164.971   2
  -2  12  20-18.9046 98.4040   2
   2  12  20 191.587 134.338   2
   2 -14   0 111346. 1472.63   1
  -2 -14  -1 925.121 156.014   1
   2 -14  -1 889.817 152.854   1
   2 -14   1 1081.12 162.113   1
  -2 -14  -2 238.834 103.341   1
   2 -14   2 40.5355 126.662   1
   2 -14  -2 431.927 109.605   1
  -2 -14  -3 3116.03 254.242   1
   2 -14  -3 3222.65 239.465   1
   2 -14  -4 1554.54 174.043   1
  -2 -14  -4 1600.19 203.726   1
   2 -14  -5 13004.7 487.581   1
  -2 -14  -5 12960.5 526.824   1
  -2 -14  -6 2289.83 233.296   1
   2 -14  -6 2796.20 238.124   1
  -2 -14  -7 2876.02 277.820   1
   2 -14  -7 2643.82 245.161   1
  -2 -14  -8 3555.27 317.963   1
   2  14   8 3483.76 392.177   6
  -2  14   8 3482.45 387.809   6
   2 -14  -8 3314.39 290.511   1
   2 -14  -9 28801.4 910.198   1
  -2  14   9 31115.1 1177.11   6
  -2 -14  -9 28613.5 945.098   1
   2  14   9 31296.5 1191.80   6
  -2  14  10 246.157 179.699   6
   2  14  10-26.8622 116.087   6
   2 -14 -10 11.4825 76.7872   1
  -2  14  11 10071.5 746.421   6
   2  14 -11 9548.68 570.901   1
   2 -14 -11 10462.2 634.808   1
   2  14  11 10926.4 793.610   6
   2  14  12 221.881 193.114   6
  -2  14  12 265.974 227.098   6
   2  14  13 4921.95 577.010   6
   2  14  13 4797.74 501.948   2
  -2  14  13 4862.21 560.759   6
   2  14  14 839.483 246.778   2
  -2  14  14 1065.19 300.183   6
   2  14  14 974.467 271.087   6
  -2  14  15 180.467 177.134   6
   2  14  15 99.6466 145.035   2
   2  14  15 383.416 268.610   6
   2  14  16 9.48785 172.611   2
   2  14  16 142.255 254.920   6
  -2  14  16 539.046 262.812   6
   2  14  17-49.4175 165.837   2
  -2  14  17-24.0760 138.694   2
   2  14  18 2582.94 374.386   2
  -2  14  18 2484.42 357.794   2
   2  14  19 211.881 121.452   2
  -2  14  19 328.576 143.197   2
  -2  14  20 2299.96 299.116   2
   2  14  20 2082.96 285.663   2
   2 -16   0 54227.9 1140.73   1
   2 -16   1 1193.55 179.112   1
  -2 -16  -1 952.953 198.495   1
   2 -16  -1 1187.75 205.828   1
   2 -16  -2 1034.73 172.842   1
  -2 -16  -2 739.984 178.615   1
   2 -16   2 1110.14 203.341   1
   2 -16  -3 1505.13 197.805   1
  -2 -16  -3 1596.02 205.447   1
   2 -16  -4 5929.29 359.244   1
  -2 -16  -4 5395.96 364.018   1
  -2 -16  -5 19419.6 697.360   1
   2 -16  -5 19262.3 650.408   1
  -2 -16  -6 1042.19 177.197   1
   2 -16  -6 1076.60 177.141   1
   2 -16  -7 8140.75 450.923   1
  -2 -16  -7 7626.11 484.156   1
  -2  16   7 7968.85 544.489   6
   2  16   7 7933.68 550.390   6
   2 -16  -8 8940.55 520.662   1
  -2 -16  -8 9363.52 557.992   1
  -2  16   8 9113.79 631.306   6
   2  16   8 9181.94 623.147   6
   2 -16  -9 26014.6 931.416   1
   2  16   9 25766.1 1093.75   6
  -2  16   9 25680.6 1096.03   6
  -2  16  10 1484.89 297.824   6
   2  16  10 1476.44 318.329   6
   2 -16 -10 1229.57 250.991   1
  -2  16  11 13465.0 867.579   6
   2  16  11 13210.9 858.995   6
   2 -16 -11 12756.8 758.936   1
   2  16 -12 936.710 199.952   1
   2  16  12 1107.65 291.551   6
  -2  16  12 1778.79 397.668   6
   2  16  13 910.039 248.684   2
  -2  16  13 1252.02 327.897   6
   2  16  13 964.154 280.087   6
   2  16  14 76.7512 194.798   6
   2  16  14 73.8844 156.127   2
  -2  16  14 472.812 271.412   6
  -2  16  15 1035.12 277.111   6
   2  16  15 1123.14 273.609   2
   2  16  15 1070.81 311.321   6
   2  16  16 40.5175 162.465   6
   2  16  16-204.965 179.916   2
  -2  16  16 202.043 193.361   6
  -2  16  17 1596.14 378.530   6
   2  16  17 1582.73 319.622   2
  -2  16  17 1263.88 251.597   2
   2  16  18 2940.33 401.295   2
  -2  16  18 3220.13 400.407   2
  -2  16  19 2785.81 345.933   2
   2  16  19 2827.36 365.993   2
   2 -18   0 5923.70 415.453   1
  -2 -18  -1 1121.24 221.838   1
   2 -18   1 1240.66 239.425   1
   2 -18  -1 1181.12 210.031   1
  -2 -18  -2 6124.48 450.046   1
   2 -18   2 6457.95 469.931   1
   2 -18  -2 5883.33 420.920   1
   2 -18  -3-145.341 131.041   1
  -2 -18  -3 272.983 138.836   1
   2 -18  -4 29040.7 850.499   1
  -2 -18  -4 27711.6 906.621   1
   2 -18  -5 513.128 156.270   1
  -2 -18  -5 397.008 132.251   1
  -2  18   6 990.673 206.832   6
  -2 -18  -6 1310.76 205.561   1
   2 -18  -6 1203.97 186.386   1
   2 -18  -7 9485.96 524.191   1
   2  18   7 9121.64 604.571   6
  -2  18   7 8774.27 590.385   6
  -2 -18  -7 9438.89 575.984   1
   2  18   8 7635.81 588.003   6
  -2  18   8 8319.59 617.469   6
  -2 -18  -8 7977.25 559.432   1
   2 -18  -8 7589.75 502.848   1
   2 -18  -9 52478.9 1414.20   1
   2  18   9 55184.4 1625.00   6
  -2  18   9 54648.9 1647.69   6
   2  18  10 3231.45 446.568   6
   2 -18 -10 3534.50 399.066   1
  -2  18  10 3479.44 431.180   6
  -2  18  11 29783.3 1313.20   6
   2  18  11 29462.3 1307.12   6
   2 -18 -11 27475.4 1185.78   1
   2  18  12-27.0344 177.202   6
  -2  18  12 97.4474 142.856   6
   2  18  13 8375.32 743.522   6
  -2  18  13 8695.39 761.365   6
   2  18  13 8282.13 651.277   2
  -2  18  14 384.004 207.317   6
   2  18  14 369.533 214.114   6
   2  18  14 511.080 185.602   2
  -2  18  15 72.5046 164.819   6
   2  18  15 158.100 222.167   6
   2  18  15-166.181 199.720   2
  -2  18  16-104.390 180.386   6
  -2  18  16 343.799 146.866   2
   2  18  16 165.853 152.486   2
   2  18  16 23.2611 172.921   6
   2  18  17 1195.05 275.391   2
  -2  18  17 980.956 270.450   2
  -2  18  17 869.836 249.632   6
   2  18  18 4901.43 478.467   2
  -2  18  18 5516.96 503.188   2
   2  18  19 1227.20 237.940   2
  -2  18  19 1209.86 223.099   2
   2 -20   0 42789.4 1200.77   1
   2 -20  -1 398.849 162.558   1
  -2 -20  -1 243.424 115.419   1
   2 -20   1 270.034 170.260   1
   2 -20   2 342.171 163.710   1
   2 -20  -2 272.155 123.463   1
  -2 -20  -2 509.488 184.728   1
  -2 -20  -3 706.021 184.747   1
   2 -20  -3 873.895 175.355   1
   2 -20  -4 1010.57 198.306   1
  -2 -20  -4 975.511 201.504   1
   2  20   5 851.870 180.809   4
  -2 -20  -5 845.982 183.698   1
   2 -20  -5 932.592 192.200   1
  -2  20   5 842.166 186.444   6
   2 -20  -6 1160.42 195.177   1
  -2  20   6 692.151 201.309   6
  -2 -20  -6 631.955 189.642   1
   2  20   6 541.963 170.498   6
  -2 -20  -7 2287.37 303.619   1
   2  20   7 2152.30 316.139   6
  -2  20   7 2286.53 339.539   6
   2 -20  -7 1913.34 270.941   1
  -2 -20  -8 1420.79 283.886   1
   2  20   8 725.097 195.181   6
  -2  20   8 963.934 232.622   6
   2 -20  -8 1062.91 216.831   1
   2 -20  -9 19282.3 917.599   1
  -2  20   9 19161.7 1000.42   6
   2  20   9 19245.3 978.193   6
   2 -20 -10 955.152 262.443   1
   2  20  10 914.008 253.973   6
  -2  20  10 928.416 263.758   6
   2  20  11 4245.12 523.695   6
  -2  20  11 3893.79 489.175   6
   2 -20 -11 3650.79 475.155   1
  -2  20  12 453.758 213.886   6
   2  20  12 532.215 257.390   6
  -2  20  13 211.699 225.846   6
   2  20  13 151.310 173.215   2
   2  20  13 345.587 180.657   6
  -2  20  14 606.092 259.209   6
   2  20  14 643.862 253.981   6
   2  20  14 417.145 183.052   2
   2  20  15 1397.41 302.089   2
   2  20  15 1300.67 335.161   6
  -2  20  15 1118.70 302.183   6
   2  20  16 221.070 151.785   2
  -2  20  16 307.393 234.227   6
   2  20  16 239.429 144.332   6
  -2  20  16 314.741 172.187   2
  -2  20  17 322.877 157.782   2
  -2  20  17 248.604 142.624   6
   2  20  17 218.396 142.034   2
   2  20  18 1817.71 288.249   2
  -2  20  18 2366.84 334.403   2
   2  20  19 1268.12 226.885   2
  -2  20  19 1356.41 223.065   2
   2 -22   0 16956.1 878.686   1
   2 -22   1 321.755 146.330   1
   2 -22  -1 437.582 163.594   1
   2  22   2 45.4963 81.5263   4
   2 -22  -2 191.830 148.017   1
  -2 -22  -2-100.805 117.783   1
  -2  22   3 1485.40 265.289   6
   2 -22  -3 1093.33 218.283   1
   2  22   3 1165.88 217.980   4
  -2 -22  -3 962.827 210.755   1
   2  22   4 3877.81 379.332   6
  -2 -22  -4 4507.26 469.861   1
   2 -22  -4 4737.98 436.510   1
   2  22   4 4698.64 414.206   4
  -2  22   4 4467.59 455.350   6
   2 -22  -5 12935.8 702.097   1
   2  22   5 11636.3 666.000   6
  -2 -22  -5 13078.3 779.747   1
  -2  22   5 12450.8 728.457   6
   2  22   5 11879.8 686.990   4
   2  22   6 6960.52 535.714   6
   2 -22  -6 7951.86 562.230   1
  -2 -22  -6 7706.09 587.690   1
  -2  22   6 6783.10 546.386   6
  -2 -22  -7 5664.15 528.575   1
   2  22   7 5686.61 498.200   6
  -2  22   7 5035.40 491.240   6
   2 -22  -7 5082.36 460.488   1
   2 -22  -8 312.915 162.040   1
  -2 -22  -8 520.111 181.508   1
  -2  22   8 161.843 163.187   6
   2  22   8 238.335 159.734   6
   2  22   9 251.893 229.076   6
  -2  22   9 12.7396 139.644   6
   2 -22  -9 70.2270 125.981   1
   2  22  10 776.605 246.270   6
  -2  22  10 842.727 249.333   6
   2 -22 -10 1188.09 306.909   1
   2  22  11 7578.48 686.050   6
  -2  22  11 7777.83 706.666   6
   2 -22 -11 6014.71 636.308   1
  -2  22  12 629.592 277.691   6
   2  22  12 582.542 201.777   2
   2  22  12 553.344 210.285   6
  -2  22  13-0.94548 138.340   6
   2  22  13-10.6695 111.601   2
  -2  22  14 444.554 256.571   6
   2  22  14 1036.64 259.275   2
   2  22  14 996.117 275.408   6
   2  22  15 4265.01 492.289   2
  -2  22  15 3647.91 485.905   6
   2  22  15 4057.04 532.363   6
   2  22  16 2460.60 420.315   6
  -2  22  16 2406.26 399.176   6
  -2  22  16 2333.66 335.350   2
   2  22  16 2294.35 355.823   2
   2  22  17 807.839 215.827   2
  -2  22  17 716.284 204.719   2
  -2  22  17 907.292 260.697   6
   2  22  18 241.108 118.967   2
  -2  22  18 193.527 121.074   2
   2 -24   0 6450.24 606.734   1
   2  24   0 6727.41 491.264   4
  -2  24   0 5840.27 503.625   4
   2  24  -1 138.217 115.305   4
   2 -24  -1 114.438 110.540   1
   2 -24   1-157.638 171.716   1
   2  24   1 128.303 97.7513   4
   2  24   2 4175.82 397.363   6
   2  24  -2 4536.83 410.634   4
   2  24   2 4987.00 417.959   4
   2 -24  -2 4821.21 469.198   1
  -2 -24  -3 10025.0 702.812   1
   2 -24  -3 9714.92 650.866   1
   2  24   3 8217.52 564.969   6
  -2  24   3 9406.09 643.250   6
   2  24   3 9040.99 588.542   4
   2  24   4 41316.9 1267.17   6
  -2  24   4 41903.6 1358.40   6
  -2 -24  -4 43641.7 1487.97   1
   2 -24  -4 42195.4 1336.42   1
   2  24   4 40312.9 1263.90   4
   2  24   5 22055.8 938.795   6
   2  24   5 22160.3 947.033   4
  -2 -24  -5 20839.7 1070.82   1
  -2  24   5 21480.6 981.696   6
  -2  24   6 32485.4 1226.88   6
  -2 -24  -6 33063.3 1368.53   1
   2 -24  -6 34266.6 1246.20   1
   2  24   6 32313.7 1173.12   6
  -2 -24  -7 10789.3 842.114   1
   2  24   7 12963.5 772.842   6
  -2  24   7 13355.3 811.913   6
   2 -24  -7 13264.3 809.287   1
   2 -24  -8 2446.12 381.822   1
   2  24   8 2880.77 389.269   6
  -2 -24  -8 2905.55 459.882   1
  -2  24   8 2687.35 393.900   6
  -2  24   9 713.054 235.879   6
   2 -24  -9 556.183 217.851   1
   2  24   9 684.995 233.574   6
  -2  24  10 72.8906 154.791   6
   2  24  10 16.4913 164.725   6
   2 -24 -10 76.9561 208.745   1
   2  24  11 2006.76 397.360   6
   2  24  11 2154.34 349.218   2
  -2  24  11 1083.82 294.796   6
   2  24  12 1059.91 270.492   2
  -2  24  12 151.133 208.232   6
   2  24  12 729.515 255.666   6
  -2  24  13 10686.0 876.694   6
   2  24  13 12881.0 826.200   2
   2  24  13 12724.8 892.965   6
  -2  24  14 1099.04 294.604   6
   2  24  14 936.169 303.768   6
   2  24  14 1231.09 271.549   2
  -2  24  15 10383.5 823.913   6
   2  24  15 10591.8 797.866   6
  -2  24  15 11276.6 750.458   2
   2  24  15 10666.5 743.852   2
  -2  24  16 3531.70 476.187   6
  -2  24  16 4087.32 446.265   2
   2  24  16 3522.73 453.194   6
   2  24  16 3695.42 426.523   2
  -2  24  17 1583.01 271.355   2
  -2  24  17 949.884 221.823   6
   2  24  17 1394.40 249.199   2
  -2  24  18 1322.62 233.500   2
   2 -26   0 773.964 247.544   1
   2  26   0 747.980 204.404   4
   2 -26  -1 45.1517 157.887   1
   2  26  -1 400.296 185.293   4
   2  26   1 263.807 150.587   4
  -2  26  -1 318.955 175.329   4
   2 -26  -2 9153.72 692.271   1
   2  26  -2 8761.43 604.514   4
   2  26   2 8201.80 584.247   6
   2  26   2 7698.41 562.696   4
   2  26   3 4448.77 442.783   4
   2  26  -3 4837.86 448.800   4
   2  26   3 4033.10 425.757   6
   2 -26  -3 4874.82 497.542   1
  -2  26   3 4072.25 471.740   6
  -2 -26  -4 44375.8 1582.42   1
   2  26  -4 39751.7 1225.59   4
  -2  26   4 41787.9 1407.78   6
   2  26   4 41344.7 1321.23   4
   2 -26  -4 39985.1 1404.20   1
   2  26   4 41663.8 1315.66   6
   2  26  -5 25077.6 947.677   4
   2  26   5 24322.4 1028.47   6
  -2  26   5 24503.6 1105.91   6
   2 -26  -5 25135.4 1117.29   1
  -2 -26  -5 27291.8 1279.70   1
   2 -26  -6 17427.8 959.540   1
   2  26   6 16696.4 861.672   6
  -2  26   6 17553.5 920.410   6
  -2 -26  -6 18044.8 1076.59   1
   2  26   7 32240.3 1251.58   6
  -2 -26  -7 32956.3 1551.69   1
   2 -26  -7 29265.9 1284.59   1
  -2  26   7 32210.2 1288.26   6
  -2  26   8 1145.98 235.997   6
  -2 -26  -8 1063.96 317.867   1
   2 -26  -8 627.703 204.871   1
   2  26   8 1225.11 270.795   6
  -2  26   9 327.999 171.671   6
   2  26   9 89.5223 132.581   6
   2 -26  -9 275.774 177.397   1
  -2  26  10 458.658 239.675   6
   2 -26 -10 701.233 273.751   1
   2  26  10 715.646 227.480   6
   2  26  11 4354.26 518.314   6
  -2  26  11 4677.74 557.546   6
   2  26  11 4608.18 474.944   2
   2  26  12 1023.90 272.214   2
   2  26  12 723.180 258.096   6
  -2  26  12 1006.58 377.992   6
   2  26  13 4709.46 531.840   6
  -2  26  13 5435.65 617.257   6
   2  26  13 5361.12 560.969   2
   2  26  14 5089.68 551.864   6
   2  26  14 5294.36 534.238   2
  -2  26  14 4818.58 587.712   6
   2  26  15 12253.8 836.201   6
   2  26  15 13332.6 808.353   2
  -2  26  15 11012.5 804.854   6
  -2  26  15 12759.9 781.834   2
   2  26  16 6784.67 552.564   2
  -2  26  16 7730.44 575.646   2
  -2  26  16 6553.38 598.776   6
   2  26  16 6708.93 652.018   6
  -2  26  17 3005.51 376.725   2
  -2  26  17 2137.58 345.635   6
   2  26  17 2115.21 288.233   2
   2  28   0 469.968 180.791   4
   2 -28   0 774.252 322.354   1
   2  28   1 438.914 158.561   4
   2 -28  -1 355.313 165.617   1
   2  28   1 334.668 174.539   6
   2  28  -1 267.212 139.868   4
   2  28   2 8525.45 616.079   4
   2 -28  -2 7711.34 721.481   1
   2  28  -2 9211.18 639.990   4
   2  28   2 8197.65 620.796   6
  -2  28   2 8203.95 638.512   6
   2  28   3 7889.36 597.312   6
   2  28  -3 9100.49 635.658   4
   2 -28  -3 7382.96 681.340   1
   2  28   3 7577.49 587.671   4
  -2  28   3 8742.70 674.313   6
   2 -28  -4 27048.2 1225.57   1
   2  28   4 27568.5 1106.19   6
   2  28  -4 28228.4 1088.56   4
  -2  28   4 29511.2 1230.69   6
   2  28   4 27786.6 1133.48   4
   2  28   5 7454.56 586.412   6
   2 -28  -5 7162.67 644.572   1
  -2 -28  -5 7891.69 740.281   1
   2  28  -5 7674.58 552.790   4
  -2  28   5 7531.75 668.068   6
  -2 -28  -6 15922.8 1067.50   1
  -2  28   6 13942.0 861.740   6
   2 -28  -6 12704.1 866.814   1
   2  28   6 13680.4 802.127   6
  -2 -28  -7 5945.20 696.784   1
  -2  28   7 5284.01 553.189   6
   2  28   7 5514.62 526.419   6
   2 -28  -7 5479.98 596.891   1
  -2  28   8 293.336 196.098   6
   2  28   8 351.965 210.143   6
   2 -28  -8 146.651 214.941   1
  -2  28   9 733.148 306.326   6
   2 -28  -9 317.676 282.003   1
   2  28   9 355.653 197.643   6
   2  28  10 285.669 157.104   6
  -2  28  10 344.642 183.506   6
   2  28  11 1287.41 319.137   6
  -2  28  11 1071.62 328.635   6
  -2  28  12 66.6536 149.829   6
   2  28  12 588.790 264.466   6
  -2  28  13 9258.56 781.369   6
   2  28  13 9379.16 741.990   6
  -2  28  14 2099.44 395.709   6
   2  28  14 2047.03 354.412   6
  -2  28  14 2430.82 362.750   2
  -2  28  15 12883.6 738.532   2
  -2  28  15 11945.1 818.814   6
   2  28  15 11731.5 782.608   6
   2  28  16 2614.22 355.996   6
  -2  28  16 2032.79 335.926   6
  -2  28  16 2444.51 305.505   2
  -2  28  17 483.090 179.826   6
   2  30   0 12522.2 786.922   4
   2 -30  -1 1147.51 363.886   1
   2  30   1 675.333 211.828   6
   2  30  -1 808.575 213.299   4
   2  30   1 668.947 188.007   4
   2  30   2 107.461 194.615   6
   2  30  -2 41.4072 115.020   4
  -2  30   2 153.469 188.067   6
   2  30   2 220.063 133.129   4
   2 -30  -2-158.083 160.685   1
   2  30  -3 902.075 216.718   4
   2 -30  -3 1058.89 352.877   1
   2  30   3 717.277 213.540   4
   2  30   3 681.657 199.544   6
  -2  30   3 1008.21 275.108   6
  -2  30   4 1326.12 296.552   6
   2 -30  -4 1113.36 285.550   1
   2  30  -4 1486.98 265.046   4
   2  30   4 1544.76 299.692   6
   2  30  -5 5382.19 471.904   4
   2  30   5 5411.21 517.881   6
   2 -30  -5 4549.73 554.034   1
  -2  30   5 5710.68 574.564   6
   2  30   6 2956.50 389.417   6
   2 -30  -6 1839.91 388.705   1
  -2  30   6 1947.79 379.306   6
  -2  30   7 186.754 159.726   6
   2  30   7 485.913 177.645   6
   2 -30  -7 646.647 276.967   1
  -2  30   8-8.96034 143.001   6
   2 -30  -8-11.3998 127.057   1
   2  30   8 361.844 195.832   6
   2  30   9 5867.75 584.214   6
  -2  30   9 5374.39 641.367   6
  -2  30  10 155.796 248.529   6
   2  30  10 674.207 185.650   6
  -2  30  11 2663.42 453.117   6
   2  30  11 3089.90 439.895   6
  -2  30  12 117.904 194.888   6
   2  30  12 207.941 151.312   6
  -2  30  13 3933.05 510.137   2
   2  30  13 2922.93 424.916   6
  -2  30  13 2770.85 421.324   6
   2  30  14 1569.75 325.880   6
  -2  30  14 1427.79 267.556   2
  -2  30  14 1200.63 300.336   6
  -2  30  15 2284.29 362.793   6
   2  30  15 1911.00 319.664   6
  -2  30  15 2360.55 319.005   2
  -2  30  16 1458.95 277.707   6
   2  30  16 1273.88 226.143   6
   2  32   0 35869.3 1380.55   6
   2  32   0 34169.5 1321.41   4
   2  32  -1 2820.78 402.053   4
   2  32   1 2526.63 388.747   6
   2  32   1 2358.35 371.407   4
  -2  32   2 4125.62 505.886   6
   2  32   2 4402.30 495.648   6
   2 -32  -2 3949.94 546.823   1
   2  32   2 4365.29 492.254   4
   2  32  -2 4240.55 471.052   4
   2  32  -3 2532.79 350.945   4
   2  32   3 2271.27 339.920   6
  -2  32   3 2301.39 371.541   6
   2 -32  -3 2384.46 432.890   1
   2  32   4 24.4297 122.771   6
   2  32  -4 133.281 91.4333   4
  -2  32   4 262.114 235.733   6
   2 -32  -4-191.086 183.932   1
  -2  32   5 190.105 205.012   6
   2 -32  -5 365.673 244.874   1
   2  32   5 470.417 165.851   6
  -2  32   6 863.126 277.810   6
   2 -32  -6 347.534 260.591   1
   2  32   6 713.119 226.067   6
   2 -32  -7 70.0958 168.497   1
  -2  32   7 77.9361 176.326   6
   2  32   7 41.2080 151.525   6
  -2  32   8 2928.54 474.137   6
   2  32   8 3287.43 444.845   6
  -2  32   9 16296.9 1048.55   6
   2  32   9 16888.0 971.009   6
   2  32  10 2512.71 399.827   6
  -2  32  10 2516.83 446.726   6
   2  32  11 12977.6 860.107   6
  -2  32  11 12898.0 909.241   6
   2  32  12 518.888 206.809   6
  -2  32  12 397.958 192.436   6
   2  32  13 860.534 238.381   6
  -2  32  13 1137.63 287.509   6
   2  32  14 102.969 132.377   6
  -2  32  14 13.7445 123.351   6
   2  32  15 306.000 152.952   6
  -2  32  15 325.117 180.031   6
  -2  32  16-28.4729 150.710   6
   2  34   0 63683.0 1876.20   6
   2  34   0 58420.7 1804.21   4
   2  34  -1 3767.29 477.317   4
  -2  34   1 3289.45 465.428   6
   2  34   1 3181.35 493.926   6
   2  34   1 3308.15 469.015   4
   2  34   2 46552.7 1575.72   6
   2  34  -2 46488.5 1562.42   4
  -2  34   2 49053.1 1675.03   6
  -2  34   3 378.053 219.736   6
   2  34   3 410.466 184.240   6
   2  34  -3 515.114 163.805   4
   2 -34  -4 608.291 248.217   1
  -2  34   4 478.401 220.207   6
   2  34  -4 362.035 152.965   4
   2  34   4 289.121 148.132   6
   2  34   5 302.950 160.504   6
  -2  34   5 485.417 216.658   6
   2 -34  -5 563.299 251.923   1
  -2  34   6 510.370 229.879   6
   2  34   6 654.223 219.276   6
  -2  34   7 1724.80 382.765   6
   2  34   7 2137.49 356.833   6
  -2  34   8 2984.76 456.839   6
   2  34   8 2759.58 397.237   6
  -2  34   9 28575.1 1337.62   6
   2  34   9 27210.9 1233.18   6
  -2  34  10 2941.69 456.356   6
   2  34  10 3258.14 450.650   6
   2  34  11 17976.1 982.811   6
  -2  34  11 17845.3 1047.73   6
  -2  34  12 1225.85 304.404   6
   2  34  12 1024.73 250.477   6
   2  34  13 4022.05 435.797   6
  -2  34  13 4168.86 497.267   6
  -2  34  14 205.890 139.887   6
   2  34  14 495.826 195.896   6
  -2  34  15 474.151 168.058   6
  -2  36   0 51733.0 1735.19   6
   2  36   0 56240.0 1787.38   6
   2  36   0 53575.9 1725.91   4
   2  36   1 9006.37 727.503   6
  -2  36   1 8687.73 738.329   6
   2  36  -1 9697.88 767.317   6
   2  36  -1 8902.82 728.930   4
  -2  36   2 12990.0 865.440   6
   2  36   2 13141.9 846.338   6
   2  36  -2 13206.4 852.884   4
   2  36  -3 3268.49 419.611   4
  -2  36   3 3043.19 425.917   6
   2  36   3 2762.36 420.766   6
   2  36   4 889.306 258.388   6
  -2  36   4 770.526 257.811   6
   2  36  -4 761.759 208.707   4
  -2  36   5 1136.92 292.754   6
   2  36   5 1160.40 248.651   6
  -2  36   6 597.866 311.688   6
   2  36   6 86.8317 143.343   6
  -2  36   7 386.307 196.960   6
   2  36   7 311.637 181.618   6
   2  36   8 2749.42 416.072   6
  -2  36   8 2620.96 395.740   6
  -2  36   9 18168.3 1046.07   6
   2  36   9 17775.8 972.729   6
   2  36  10 1554.34 313.385   6
  -2  36  10 2344.38 393.778   6
   2  36  11 18047.8 959.924   6
  -2  36  11 18577.7 1014.28   6
   2  36  12 1148.37 252.413   6
  -2  36  12 1186.42 277.880   6
   2  36  13 3441.30 382.415   6
  -2  36  13 3790.63 425.358   6
  -2  36  14 208.603 143.889   6
  -2  38   0 60732.6 1872.45   6
   2  38   0 62679.0 1901.60   6
   2  38   1 610.014 185.176   6
  -2  38  -1 340.790 152.259   6
  -2  38   1 369.250 179.694   6
   2  38  -1 625.170 232.974   6
  -2  38   2 2021.68 374.563   6
   2  38   2 2021.18 361.207   6
   2  38  -2 1822.33 382.509   6
   2  38   3 365.464 161.261   6
  -2  38   3 25.9949 195.577   6
  -2  38   4 944.814 244.461   6
   2  38   4 1689.67 321.422   6
   2  38   5 551.129 208.372   6
  -2  38   5 817.451 246.212   6
  -2  38   6 1283.71 304.827   6
   2  38   6 1523.69 292.585   6
  -2  38   7 335.425 197.961   6
   2  38   7 310.306 146.356   6
  -2  38   8 796.357 272.681   6
   2  38   8 451.551 190.482   6
  -2  38   9 6900.37 604.567   6
   2  38   9 6677.06 590.827   6
  -2  38  10 1323.69 310.147   6
   2  38  10 1387.01 274.713   6
  -2  38  11 5298.43 516.145   6
   2  38  11 5063.09 486.967   6
  -2  38  12 704.485 220.581   6
   2  38  12 610.114 167.871   6
  -2  38  13 138.526 95.0168   6
   2  40   0 362.249 202.057   6
  -2  40   0 313.987 200.735   6
   2  40   1 447.667 225.365   6
  -2  40  -1 412.126 189.898   6
  -2  40   1 410.999 194.676   6
   2  40  -1 351.379 144.409   6
  -2  40  -2 665.931 240.482   6
  -2  40   2 591.600 207.058   6
   2  40   2 618.377 219.235   6
   2  40  -2 535.047 160.761   6
  -2  40   3 1297.23 326.383   6
   2  40   3 1319.07 285.747   6
   2  40  -3 1602.01 334.391   6
  -2  40   4 5697.83 553.045   6
   2  40   4 6015.79 562.681   6
   2  40  -4 6316.16 569.452   6
  -2  40   5 4607.29 512.131   6
   2  40   5 5321.54 535.158   6
  -2  40   6 3832.95 463.233   6
   2  40   6 3775.17 455.892   6
   2  40   7 969.760 222.345   6
  -2  40   7 902.876 255.240   6
  -2  40   8 186.582 177.462   6
   2  40   8-100.294 147.102   6
  -2  40   9 741.258 233.921   6
   2  40   9 708.769 217.867   6
   2  40  10 173.498 165.241   6
  -2  40  10 226.681 165.551   6
   2  40  11 306.151 156.377   6
  -2  40  11 462.833 170.383   6
  -2  40  12 216.316 115.552   6
  -2  42   0 280.974 179.600   6
   2  42   0 381.586 167.458   6
  -2  42   1 390.055 181.920   6
   2  42   1 686.879 219.218   6
   2  42  -1 400.603 172.757   6
  -2  42  -1 445.293 231.700   6
   2  42   2 2093.72 343.882   6
  -2  42  -2 1712.41 307.924   6
   2  42  -2 2014.13 336.012   6
  -2  42   2 2268.80 359.224   6
   2  42  -3 1962.15 304.848   6
   2  42   3 1752.60 295.747   6
  -2  42  -3 2250.46 363.294   6
  -2  42   3 2046.18 330.944   6
   2  42  -4 12042.3 740.798   6
   2  42   4 14407.5 852.030   6
  -2  42   4 13466.7 818.677   6
   2  42   5 7894.21 626.859   6
  -2  42   5 7611.68 619.961   6
   2  42   6 5223.48 497.293   6
  -2  42   6 5267.92 517.707   6
   2  42   7 4382.77 455.196   6
  -2  42   7 4621.33 483.340   6
   2  42   8 679.042 181.589   6
  -2  42   8 1090.80 240.843   6
  -2  42   9 64.8649 108.714   6
   2  42   9 177.887 139.184   6
   2  42  10 115.905 106.786   6
  -2  42  10-55.1346 88.6443   6
  -2  42  11 587.601 154.240   6
   2  44   0 325.314 173.484   6
  -2  44   0 376.599 179.170   6
  -2  44  -1 307.219 125.613   6
   2  44  -1-47.7046 104.158   6
  -2  44   1 3.94476 120.302   6
   2  44   1-59.2889 94.2278   6
  -2  44   2 2939.93 375.839   6
  -2  44  -2 2918.63 364.807   6
   2  44   2 3096.59 374.081   6
  -2  44  -3 2792.38 380.705   6
  -2  44   3 2652.70 363.401   6
   2  44   3 2400.00 341.115   6
  -2  44  -4 10157.7 666.003   6
  -2  44   4 10692.7 698.205   6
   2  44   4 9697.51 660.793   6
  -2  44  -5 6883.06 574.131   6
  -2  44   5 6815.54 561.263   6
   2  44   5 5894.12 518.372   6
  -2  44  -6 6553.30 511.918   6
  -2  44   6 6632.15 539.125   6
   2  44   6 6235.63 513.068   6
  -2  44   7 4928.02 451.851   6
   2  44   7 3943.02 413.953   6
  -2  44   8 826.516 204.905   6
  -2  44   9 618.124 170.403   6
  -2  46   0 2261.03 308.343   6
  -2  46  -1 69.4341 138.099   6
  -2  46   1-78.7927 96.3401   6
  -2  46  -2 36.3325 94.5841   6
  -2  46   2 323.734 156.905   6
  -2  46   3 834.603 195.023   6
  -2  46  -3 985.999 221.732   6
  -2  46  -4 3095.01 337.436   6
  -2  46   4 3264.22 383.442   6
  -2  46  -5 3519.19 347.676   6
  -2  46   5 3447.29 361.221   6
  -2  46  -6 3347.44 325.112   6
  -2  46   6 4628.56 419.040   6
  -2  46   7 3372.48 342.229   6
  -2  48   0 4664.12 390.144   6
  -2  48   1 705.238 162.877   6
  -2  48  -1 722.086 163.322   6
  -2  48   2 879.899 181.341   6
  -2  48  -2 776.513 168.175   6
  -2  48  -3 61.2041 85.8452   6
  -2  48   3 172.894 94.9721   6
  -2  48   4 296.766 130.330   6
   3  -1   0 156.438 29.7135   1
   3  -1  -1 39555.2 422.881   1
   3  -1   1 43028.2 300.778   1
   3  -1  -2 10097.9 244.263   1
   3   1  -3 42034.9 557.416   1
   3  -1  -3 40769.1 545.792   1
   3  -1  -4 3601.67 184.150   1
   3   1  -4 3886.92 186.281   1
  -3   1  -4 3238.24 82.4881   1
   3  -1  -5 24005.3 506.294   1
  -3   1  -5 21462.8 275.227   1
   3   1  -5 24279.1 512.094   1
   3  -1  -6 1618.49 149.992   1
  -3   1  -6 1550.06 93.5372   1
  -3  -1  -6 1587.95 88.3306   1
   3   1  -6 1656.69 156.518   1
  -3   1  -7 247.509 48.1154   1
   3  -1  -7 337.561 106.387   1
   3   1  -7 269.159 99.9508   1
  -3  -1  -7 226.996 45.0532   1
   3  -1  -8 13056.3 501.229   1
   3   1  -8 13159.3 498.905   1
   3   1  -9 3362.57 286.706   1
   3  -1  -9 3545.74 279.949   1
   3   1  10 16988.9 781.414   2
  -3   1  10 14719.7 746.110   6
   3  -1  10 17385.4 804.030   2
  -3  -1  10 14198.7 728.207   6
   3  -1 -10 16543.0 640.320   1
   3   1 -10 17187.8 659.501   1
   3   1  10 16527.1 854.341   6
   3  -1  11 128.763 153.910   2
  -3  -1  11-35.1623 119.964   6
   3   1 -11 92.3775 102.301   1
   3  -1 -11 88.5003 77.1972   1
   3   1  11 229.458 152.829   2
   3   1 -12 17596.8 775.449   1
  -3   1  12 15993.7 893.753   6
   3  -1 -12 17879.1 781.672   1
   3  -1  12 17670.2 905.868   2
   3   1  12 17037.5 886.419   2
   3   1  13 942.399 253.572   2
   3  -1 -13 809.444 194.305   1
   3   1 -13 915.444 197.531   1
   3  -1  13 942.039 239.247   2
   3  -1  14 5747.85 567.321   2
   3   1  14 6295.48 586.245   2
  -3  -1  15 1693.65 331.896   2
   3  -1  15 1701.06 388.369   2
   3   1  15 1786.13 356.019   2
  -3   1  16 6728.95 630.029   2
   3   1  16 6908.25 663.841   2
   3  -1  16 7423.87 671.176   2
  -3  -1  16 6949.79 622.881   2
   3   1  17 4442.27 556.649   2
  -3  -1  17 3668.85 466.007   2
  -3   1  17 4390.75 513.876   2
   3  -1  17 3887.19 501.297   2
  -3   1  18 1059.90 271.477   2
   3   1  18 783.612 235.991   2
  -3  -1  18 924.321 233.033   2
   3  -1  18 896.579 266.219   2
  -3  -1  19 4172.87 451.256   2
  -3   1  19 3823.98 445.843   2
   3   1  19 3903.86 463.782   2
   3  -1  19 3739.33 464.520   2
   3  -1  20 681.474 237.579   2
   3   1  20 590.577 187.298   2
  -3   1  20 481.184 191.968   2
  -3  -1  20 452.981 147.725   2
   3  -3   0 56.3512 27.0071   1
   3  -3   1 3390.78 109.088   1
   3  -3  -1 2971.81 121.941   1
   3  -3  -2 5974.10 194.045   1
   3  -3   2 5902.20 163.428   1
  -3  -3  -3 49260.3 455.654   1
   3  -3  -3 49277.9 599.039   1
   3  -3  -4 3393.29 184.021   1
  -3  -3  -4 2821.29 103.449   1
   3  -3  -5 452.764 85.5381   1
  -3  -3  -5 412.139 49.4307   1
   3   3  -5 592.688 103.757   1
  -3  -3  -6 2503.54 116.854   1
  -3   3  -6 2878.85 144.456   1
   3  -3  -6 2755.76 188.809   1
   3   3  -6 2512.14 206.713   1
  -3  -3  -7 3116.08 150.805   1
   3  -3  -7 3938.37 246.698   1
  -3   3  -7 3753.82 178.883   1
   3   3  -7 3558.72 251.504   1
   3   3  -8 1259.85 164.920   1
   3  -3  -8 1246.37 158.583   1
  -3   3  -8 1007.33 103.829   1
   3   3  -9 428.163 114.359   1
   3  -3  -9 391.517 103.439   1
   3  -3 -10 9166.63 480.920   1
  -3   3  10 8799.17 594.403   6
   3   3  10 9452.88 587.649   2
   3   3 -10 9491.99 504.737   1
   3  -3  10 9935.21 628.078   2
   3   3  10 9538.95 646.865   6
   3   3 -11 259.213 114.623   1
   3  -3  11 93.6877 117.421   2
   3   3  11 101.588 119.127   6
   3   3  11 269.139 139.590   2
   3  -3 -11 160.518 81.4523   1
  -3   3  11 212.848 165.847   6
   3   3 -12 5617.88 445.798   1
   3   3  12 5518.05 524.232   2
  -3   3  12 5428.92 529.225   6
   3   3  12 6203.61 584.870   6
   3  -3 -12 6053.98 462.863   1
   3  -3  12 5338.31 513.149   2
  -3   3  13 109.803 410.945   6
   3   3  13 159.376 129.094   2
   3  -3  13 16.2760 148.428   2
   3   3 -13 43.0820 88.2370   1
   3  -3  14 1433.66 292.504   2
   3   3  14 1493.95 306.906   2
   3   3  15 1080.06 302.987   2
  -3  -3  15 1088.97 258.472   2
   3  -3  15 1421.81 430.280   2
  -3   3  16 899.494 264.157   2
   3   3  16 597.776 219.674   2
  -3  -3  16 569.911 234.050   2
   3  -3  16 552.661 226.577   2
   3   3  17 1526.51 329.091   2
   3  -3  17 1206.09 280.608   2
  -3  -3  17 1337.61 284.841   2
  -3   3  17 1350.69 305.401   2
  -3   3  18 1841.08 337.426   2
   3   3  18 2021.00 363.366   2
   3  -3  18 1536.98 325.687   2
  -3  -3  18 1657.76 311.981   2
   3   3  19 1226.80 267.151   2
   3  -3  19 1326.46 262.178   2
  -3   3  19 1219.30 267.579   2
  -3  -3  19 1322.39 286.785   2
   3  -3  20 353.599 185.095   2
   3   3  20 7.99079 114.279   2
  -3   3  20 231.470 140.764   2
   3  -5   0 1813.43 108.723   1
   3  -5   1 23933.3 373.433   1
   3  -5  -1 25328.1 392.976   1
   3  -5  -2 830.049 83.3980   1
   3  -5   2 658.798 76.6196   1
   3  -5  -3 90769.0 833.928   1
  -3  -5  -3 89880.0 773.253   1
   3  -5  -4 28700.0 507.298   1
  -3  -5  -4 25919.0 403.112   1
  -3  -5  -5 281.886 54.2913   1
   3  -5  -5 306.163 67.8871   1
   3  -5  -6 382.823 84.2880   1
  -3  -5  -6 287.328 59.1748   1
   3   5  -7 391.955 109.370   1
  -3   5  -7 359.209 71.7747   1
  -3  -5  -7 239.320 57.2270   1
   3  -5  -7 294.394 76.5071   1
  -3   5  -8 1465.65 136.363   1
   3   5  -8 1510.79 183.533   1
   3  -5  -8 1820.66 187.608   1
   3   5  -9 344.145 117.888   1
   3  -5  -9 629.163 120.339   1
   3   5  10 1288.53 250.616   6
   3  -5 -10 1291.22 183.089   1
  -3   5  10 1433.07 276.208   6
   3  -5  10 1531.67 264.340   2
   3   5 -10 1226.73 180.548   1
   3  -5 -11 280.901 135.820   1
   3   5 -11 232.228 108.937   1
   3   5  11 418.273 167.583   2
  -3   5  11 334.588 180.778   6
   3  -5  11 243.589 137.625   2
   3   5  11 383.619 160.294   6
   3   5 -12 7405.88 522.243   1
   3   5  12 7048.97 566.820   2
  -3   5  12 7397.15 638.042   6
   3  -5  12 7873.16 619.076   2
   3   5  12 7470.71 653.229   6
   3  -5 -12 7437.70 508.709   1
  -3   5  13 253.333 185.773   6
   3   5  13 250.628 203.763   6
   3  -5  13 302.465 157.646   2
   3   5  13 498.758 188.335   2
   3   5 -13 156.771 95.0726   1
   3  -5  14 2369.95 388.209   2
  -3  -5  14 2838.51 394.962   2
   3   5  14 2648.96 402.441   2
  -3   5  14 3095.54 451.263   6
  -3  -5  15 1196.49 264.902   2
   3  -5  15 1764.43 373.153   2
   3   5  15 1356.22 308.804   2
  -3  -5  16 740.677 228.780   2
   3   5  16 621.862 249.196   2
   3  -5  16 318.139 167.541   2
  -3  -5  17 161.200 142.837   2
   3  -5  17 122.103 142.991   2
  -3   5  17 481.582 213.542   2
   3   5  17 114.464 161.163   2
  -3  -5  18 170.485 144.515   2
   3   5  18 109.215 189.112   2
  -3   5  18-38.6787 152.261   2
   3   5  19 550.026 247.393   2
   3  -5  19 428.770 200.395   2
  -3   5  19 176.699 130.351   2
   3   5  20-172.154 159.222   2
  -3   5  20-67.8913 143.083   2
   3  -5  20-28.8781 120.741   2
   3  -7   0 2635.68 149.414   1
   3  -7   1 103697. 948.418   1
   3  -7  -1 102199. 897.406   1
   3  -7   2 2208.63 157.095   1
  -3  -7  -2 2132.70 175.107   1
   3  -7  -2 2230.17 141.741   1
  -3  -7  -3 55810.6 729.823   1
   3  -7  -3 56224.2 713.480   1
   3  -7  -4 42200.5 650.108   1
  -3  -7  -4 39083.2 599.815   1
  -3  -7  -5 416.015 75.8418   1
   3  -7  -5 519.957 95.1522   1
   3  -7  -6 3884.91 227.909   1
  -3  -7  -6 3592.75 188.717   1
  -3  -7  -7 2504.45 169.375   1
   3  -7  -7 2708.81 207.295   1
   3   7  -8 4796.25 313.069   1
   3  -7  -8 3849.07 272.241   1
  -3   7  -8 3976.16 240.278   1
  -3   7   9 1010.48 230.808   6
   3  -7  -9 885.094 143.547   1
   3   7   9 800.400 183.234   6
   3   7  -9 920.185 165.509   1
   3   7  10 19371.0 933.983   6
   3  -7 -10 17471.3 687.174   1
   3   7 -10 17238.6 735.578   1
   3  -7  10 18243.1 858.316   2
   3   7  11 661.347 200.968   2
  -3   7  11 787.662 229.143   6
   3   7  11 368.381 168.886   6
   3  -7  11 546.720 201.401   2
   3   7 -11 753.600 176.456   1
   3  -7 -11 620.882 183.535   1
   3   7  12 6585.53 547.321   2
   3   7 -12 7198.86 518.411   1
  -3   7  12 7121.75 631.541   6
   3  -7  12 7346.24 610.051   2
   3  -7 -12 7604.14 515.034   1
   3   7  12 7404.86 653.003   6
  -3  -7  13 1103.94 250.770   2
   3   7  13 989.286 259.074   2
   3   7  13 983.801 272.616   6
  -3   7  13 1222.88 266.892   6
   3  -7  13 1397.88 294.735   2
   3   7 -13 1061.22 237.903   1
  -3   7  14 11007.8 848.671   6
   3  -7  14 10283.3 781.506   2
   3   7  14 11722.5 794.087   2
  -3  -7  14 10904.0 727.501   2
   3  -7  15 890.771 276.903   2
  -3  -7  15 978.868 260.299   2
  -3   7  15 1172.45 348.853   6
   3   7  15 840.547 229.170   2
  -3  -7  16 752.304 267.631   2
   3  -7  16 859.597 275.699   2
   3   7  16 547.091 160.684   2
   3  -7  17 782.353 239.103   2
   3   7  17 541.300 153.829   2
   3   7  18 2554.79 394.187   2
  -3   7  18 2764.66 397.817   2
   3  -7  18 2038.60 358.316   2
   3  -7  19 1219.89 282.507   2
   3   7  19 1334.28 291.687   2
  -3   7  19 1526.59 304.474   2
  -3   7  20 389.130 156.181   2
   3   7  20 526.216 203.798   2
   3  -9   0 879.620 127.703   1
   3  -9  -1 6764.81 264.617   1
   3  -9   1 6819.98 290.511   1
   3  -9   2 5868.16 294.056   1
   3  -9  -2 5573.82 240.294   1
  -3  -9  -2 5167.44 303.487   1
   3  -9  -3 26936.7 533.780   1
  -3  -9  -3 27825.5 598.847   1
   3  -9   3 27720.3 667.555   1
  -3  -9  -4 4393.63 243.781   1
   3  -9  -4 4952.15 240.468   1
   3  -9  -5 8049.68 319.204   1
  -3  -9  -5 7763.29 317.364   1
  -3  -9  -6 2285.45 188.904   1
   3  -9  -6 2225.24 184.486   1
   3  -9  -7 15932.1 507.618   1
  -3  -9  -7 15461.3 474.390   1
   3  -9  -8 8795.22 412.495   1
  -3  -9  -8 7920.53 358.578   1
   3   9   9 3543.04 396.492   6
  -3   9   9 3652.14 399.968   6
   3  -9  -9 3119.02 266.878   1
   3   9  -9 2727.21 278.548   1
  -3   9  10 35938.3 1288.45   6
   3  -9  10 32295.8 1151.25   2
   3  -9 -10 35170.8 978.070   1
   3   9 -10 35973.3 1033.00   1
   3   9  10 36263.0 1292.06   6
  -3   9  11 347.374 177.606   6
   3  -9  11 264.741 192.740   2
   3   9 -11 165.172 116.371   1
   3   9  11 96.0713 155.476   6
   3  -9 -11 37.3341 96.6590   1
   3  -9 -12 29532.9 1078.52   1
   3  -9  12 29338.5 1198.18   2
   3   9  12 31352.8 1344.94   6
   3   9  12 29178.4 1129.01   2
   3   9 -12 29209.5 1046.60   1
  -3   9  12 31360.5 1323.24   6
   3   9  13 1177.00 281.731   2
   3  -9  13 1453.62 295.330   2
  -3   9  13 1497.77 341.913   6
   3   9  13 1290.99 277.610   6
  -3   9  14 10899.2 852.928   6
   3   9  14 11085.5 779.681   2
   3  -9  14 11176.6 796.352   2
   3   9  14 11350.9 876.900   6
  -3   9  15 1473.93 345.075   6
   3   9  15 1314.73 292.543   2
   3  -9  15 1242.71 322.736   2
   3   9  16 4464.67 531.441   2
  -3   9  16 3386.52 471.190   6
   3  -9  16 3948.73 495.212   2
   3  -9  17 5676.56 575.888   2
   3   9  17 6491.89 627.087   2
  -3   9  17 6258.06 603.216   2
  -3   9  18 413.221 181.063   2
   3   9  18 296.842 189.862   2
   3  -9  18 361.934 158.897   2
  -3   9  19 4586.56 533.345   2
   3   9  19 3830.11 438.756   2
   3   9  20 196.826 120.480   2
  -3   9  20 579.730 204.702   2
   3 -11   0 21.5384 69.1725   1
   3 -11   1 16013.5 502.130   1
   3 -11  -1 16708.6 470.884   1
  -3 -11  -2 353.076 120.835   1
   3 -11   2 268.893 101.224   1
   3 -11  -2 380.716 84.3263   1
   3 -11  -3 3013.65 199.796   1
  -3 -11  -3 3112.63 231.877   1
   3 -11   3 3391.68 272.102   1
   3 -11  -4 6513.08 296.407   1
  -3 -11  -4 6578.37 323.408   1
   3 -11  -5 4962.16 269.814   1
  -3 -11  -5 5373.09 296.478   1
  -3 -11  -6 17435.4 551.313   1
   3 -11  -6 17785.7 530.500   1
  -3 -11  -7 1919.29 190.378   1
   3 -11  -7 1770.50 185.975   1
  -3 -11  -8 3825.39 285.356   1
   3 -11  -8 4174.08 294.219   1
   3  11   9 3269.39 381.415   6
   3 -11  -9 3384.52 294.070   1
   3 -11  10 4352.46 414.171   2
   3  11  10 5463.45 508.342   6
   3 -11 -10 5637.46 401.803   1
  -3  11  10 6072.35 535.104   6
   3  11 -10 5734.81 418.363   1
   3 -11 -11 195.657 119.813   1
   3  11 -11 275.973 162.689   1
   3  11  11 429.663 220.127   6
  -3  11  11 319.818 184.127   6
   3 -11  11 605.028 199.074   2
   3  11 -12 12579.3 691.056   1
   3 -11  12 12418.4 768.677   2
   3 -11 -12 13309.2 736.019   1
   3  11  12 13347.4 777.492   2
  -3  11  12 13419.5 901.814   6
   3  11  12 13688.8 887.434   6
   3 -11  13 145.233 146.571   2
   3  11  13-84.9445 189.030   6
   3  11  13 16.6569 161.591   2
  -3  11  13 81.1811 156.653   6
   3 -11  14 1300.30 295.225   2
  -3  11  14 1417.37 339.866   6
   3  11  14 1654.91 352.612   6
   3  11  14 1089.51 287.753   2
  -3  11  15 1165.54 337.035   6
   3  11  15 578.470 262.769   6
   3 -11  16 3959.50 496.752   2
   3  11  16 5122.78 552.552   2
  -3  11  16 4641.20 579.443   6
   3 -11  17 588.730 212.561   2
  -3  11  17 359.948 173.476   2
   3  11  17 337.796 212.389   2
   3  11  18 1560.41 316.453   2
  -3  11  18 1930.99 341.759   2
   3  11  19 1062.11 232.515   2
  -3  11  19 1229.90 274.725   2
   3  11  20 309.886 145.396   2
  -3  11  20 82.7331 109.430   2
   3 -13   0-61.6544 86.8603   1
   3 -13  -1 246.712 107.104   1
   3 -13   1 105.480 93.2604   1
   3 -13  -2 963.673 133.395   1
   3 -13   2 683.682 171.869   1
  -3 -13  -2 920.084 167.628   1
   3 -13   3 223.569 129.123   1
  -3 -13  -3 114.884 100.696   1
   3 -13  -3 274.606 94.5323   1
  -3 -13  -4 95.7261 74.5706   1
   3 -13  -4-18.9591 66.9391   1
   3 -13  -5 138.999 67.4875   1
  -3 -13  -5 217.513 101.573   1
  -3 -13  -6 19742.6 647.658   1
   3 -13  -6 20011.7 603.940   1
   3 -13  -7 885.773 143.793   1
  -3 -13  -7 913.640 154.693   1
   3  13   8 1684.05 253.583   6
   3 -13  -8 1929.55 226.943   1
  -3 -13  -8 1641.55 217.548   1
  -3  13   8 2204.02 300.323   6
   3  13   9 2252.51 324.133   6
  -3  13   9 1904.03 319.756   6
   3 -13  -9 1821.14 215.706   1
   3  13 -10 1819.41 246.490   1
   3 -13 -10 1599.99 234.165   1
   3  13  10 1939.77 340.146   6
   3 -13  10 1535.47 256.303   2
  -3  13  10 1903.04 319.426   6
   3 -13  11 120.102 136.986   2
   3  13  11 98.9920 137.551   6
   3 -13 -11 53.6691 112.409   1
  -3  13  11 278.836 183.238   6
   3  13 -11 68.4505 110.867   1
   3  13  12 221.342 147.867   2
   3  13 -12 219.485 138.388   1
   3 -13  12-7.59190 142.063   2
   3 -13 -12 173.428 129.238   1
   3  13  12 16.6600 179.402   6
  -3  13  12-17.7196 151.541   6
   3  13  13 307.773 183.391   2
   3  13  13 558.835 213.746   6
  -3  13  13 684.369 248.590   6
   3  13  14-339.785 222.733   6
  -3  13  14-78.6741 168.208   6
   3  13  14-15.2150 162.120   2
   3 -13  14 49.2019 166.257   2
  -3  13  15 154.607 181.383   6
   3  13  15-193.396 181.504   6
   3  13  15-126.749 155.632   2
   3  13  16 530.228 220.033   2
  -3  13  16 217.598 166.590   6
  -3  13  17 171.766 148.390   2
   3  13  17 481.633 190.201   2
   3  13  18-170.244 161.856   2
  -3  13  18 310.796 165.402   2
   3  13  19 413.029 180.225   2
  -3  13  19 332.643 175.348   2
   3  13  20-239.699 129.594   2
  -3  13  20 321.146 165.913   2
   3 -15   0 582.572 126.068   1
   3 -15  -1 1126.93 171.271   1
   3 -15   1 801.783 156.340   1
   3 -15  -2 790.255 140.121   1
  -3 -15  -2 657.282 158.500   1
   3 -15   2 702.783 168.835   1
   3 -15  -3 11117.7 459.403   1
   3 -15   3 11813.5 577.384   1
  -3 -15  -4 5277.82 377.550   1
   3 -15  -4 5085.19 318.004   1
  -3 -15  -5 45946.6 1041.62   1
   3 -15  -5 45016.0 928.149   1
  -3 -15  -6 4985.49 359.069   1
   3 -15  -6 5385.49 341.499   1
  -3 -15  -7 62.7722 87.8378   1
   3 -15  -7 26.2774 76.5629   1
  -3  15   7 302.297 103.897   6
   3 -15  -8 8435.96 479.846   1
  -3 -15  -8 8303.03 503.328   1
   3  15   8 8602.34 591.533   6
  -3  15   8 8917.33 608.055   6
   3 -15  -9 2803.21 292.844   1
  -3  15   9 3439.54 394.655   6
   3  15   9 3055.01 366.118   6
  -3  15  10 3760.23 458.653   6
   3  15  10 3617.55 441.187   6
   3 -15 -10 3771.21 375.328   1
   3 -15 -11 190.344 111.927   1
  -3  15  11 75.1147 167.358   6
   3  15 -11 147.325 102.299   1
   3  15  11 32.0542 121.233   6
   3 -15 -12 7144.06 591.403   1
  -3  15  12 7934.32 695.251   6
   3  15  12 7568.96 607.192   2
   3  15 -12 5672.83 472.426   1
   3  15  12 7514.08 675.981   6
   3  15  13 1185.18 254.715   2
   3  15  13 1552.99 363.203   6
  -3  15  13 1330.01 322.322   6
  -3  15  14 1615.82 364.721   6
   3  15  14 1613.97 327.176   2
   3  15  14 1706.84 359.087   6
   3  15  15 1114.99 309.365   6
  -3  15  15 1017.08 279.193   6
   3  15  15 930.541 257.252   2
  -3  15  16 2083.23 404.386   6
   3  15  16 2585.93 389.256   2
  -3  15  17 914.815 271.720   6
   3  15  17 1650.26 306.051   2
  -3  15  17 1668.83 302.791   2
   3  15  18 952.578 246.450   2
  -3  15  18 1116.04 268.107   2
  -3  15  19 1513.87 266.648   2
   3  15  19 1558.27 260.975   2
  -3  15  20 115.845 84.7006   2
   3 -17   0 89.3746 122.142   1
   3 -17   1 8165.70 487.684   1
   3 -17  -1 8394.88 460.754   1
   3 -17  -2 60.5223 72.3892   1
  -3 -17  -2 110.733 100.463   1
   3 -17   2-4.76983 124.303   1
   3 -17  -3 3688.03 303.318   1
  -3 -17  -3 3507.73 338.137   1
   3 -17  -4 41200.3 970.710   1
  -3 -17  -4 32371.8 1033.88   1
   3 -17  -5 46558.4 1048.98   1
  -3 -17  -5 51274.5 1210.54   1
  -3 -17  -6 13439.5 638.411   1
  -3  17   6 13749.3 701.234   6
   3 -17  -6 12346.9 574.203   1
  -3  17   7 15967.3 794.760   6
   3 -17  -7 15144.1 647.328   1
  -3 -17  -7 15036.1 698.471   1
   3  17   7 15084.2 769.531   6
   3 -17  -8 23869.1 853.057   1
  -3  17   8 25446.5 1061.95   6
  -3 -17  -8 24498.4 932.239   1
   3  17   8 26220.4 1058.49   6
   3 -17  -9 1921.41 273.962   1
  -3  17   9 1946.78 321.429   6
   3  17   9 2099.49 329.935   6
   3 -17 -10 6273.74 510.475   1
  -3  17  10 6567.22 592.705   6
   3  17  10 6575.85 590.781   6
   3  17  11 363.182 191.160   6
   3 -17 -11 270.463 125.253   1
  -3  17  11 542.027 238.762   6
   3  17 -11 322.637 139.717   1
   3  17  12 6208.45 627.527   6
   3 -17 -12 5255.46 551.217   1
   3  17  12 6400.77 555.748   2
  -3  17  12 6026.28 610.374   6
   3  17  13-12.7459 144.523   2
   3  17  13 344.483 205.922   6
  -3  17  13 167.849 162.560   6
  -3  17  14 4942.14 581.055   6
   3  17  14 5141.80 545.648   2
   3  17  14 5209.06 607.891   6
  -3  17  15 1788.72 372.074   6
   3  17  15 1998.47 343.869   2
   3  17  15 1318.13 317.615   6
   3  17  16 4725.84 519.042   2
  -3  17  16 4225.78 533.824   6
   3  17  16 4055.98 506.533   6
   3  17  17 6136.99 556.259   2
  -3  17  17 6000.93 564.034   2
  -3  17  17 5980.45 647.379   6
   3  17  18 1540.59 298.228   2
  -3  17  18 2064.93 328.261   2
  -3  17  19 3586.33 372.922   2
   3  17  19 3017.39 358.906   2
   3 -19   0 859.570 179.491   1
   3 -19   1 414.572 158.300   1
   3 -19  -1 388.862 152.507   1
   3 -19   2 1053.76 234.503   1
   3 -19  -2 1259.67 216.132   1
   3 -19  -3 48232.1 1153.62   1
  -3 -19  -3 45874.9 1243.91   1
   3 -19  -4 12348.9 581.874   1
  -3 -19  -4 11008.0 644.735   1
  -3  19   5 23561.3 944.796   6
   3 -19  -5 23644.5 802.514   1
  -3 -19  -5 20222.9 888.303   1
   3  19   5 22010.2 865.179   4
  -3  19   6 19672.5 883.254   6
   3 -19  -6 19110.5 748.148   1
   3  19   6 18206.6 820.392   6
   3  19   6 19097.4 834.075   4
   3  19   7 3999.19 394.561   6
   3 -19  -7 4189.68 367.980   1
  -3  19   7 4024.61 413.287   6
  -3 -19  -7 4029.88 417.094   1
   3  19   8 17679.6 890.926   6
   3 -19  -8 16417.0 759.876   1
  -3  19   8 16303.7 870.380   6
   3 -19  -9 1556.92 267.842   1
  -3  19   9 1890.74 322.645   6
   3  19   9 1760.56 308.336   6
   3 -19 -10 3050.19 378.016   1
   3  19  10 2932.96 409.143   6
  -3  19  10 2998.89 411.981   6
   3 -19 -11 670.328 244.137   1
   3  19  11 446.005 173.133   2
   3  19  11 553.250 188.819   6
   3  19  12 4426.66 537.826   6
   3  19  12 4681.76 490.553   2
  -3  19  12 5134.49 596.133   6
   3  19  13 494.629 247.241   6
  -3  19  13 641.257 221.488   6
   3  19  13 391.214 206.949   2
   3  19  14 1289.04 295.497   2
  -3  19  14 1247.68 305.219   6
   3  19  14 1341.67 331.768   6
  -3  19  15 246.700 170.255   6
   3  19  15 602.230 240.711   6
   3  19  15 743.517 226.077   2
   3  19  16 3201.06 433.711   2
  -3  19  16 3135.65 462.856   6
   3  19  16 3715.48 502.117   6
   3  19  17 1904.20 320.616   2
  -3  19  17 1956.61 356.747   6
  -3  19  17 2038.72 309.114   2
   3  19  18 1589.20 291.147   2
  -3  19  18 1685.73 279.340   2
  -3  19  19 4077.20 384.268   2
   3  19  19 3317.26 343.844   2
   3 -21   0 127.099 124.707   1
   3 -21   1 6745.23 558.094   1
   3 -21  -1 7275.67 516.515   1
   3 -21  -2 1948.28 294.598   1
   3 -21   2 1479.72 263.709   1
   3 -21  -3 12264.2 644.787   1
  -3 -21  -3 12199.6 692.070   1
  -3  21   3 11425.7 678.756   6
  -3  21   4 376.395 163.052   6
   3  21   4 239.228 104.499   4
   3 -21  -4 197.179 106.197   1
  -3 -21  -4 224.770 110.953   1
  -3 -21  -5 341.148 147.322   1
   3  21   5 317.094 125.071   4
   3  21   5 172.997 113.814   6
  -3  21   5 601.434 227.801   6
   3 -21  -5 247.556 126.080   1
   3  21   6 1662.59 271.899   4
   3 -21  -6 1383.66 224.336   1
  -3 -21  -6 1119.75 255.191   1
   3  21   6 1510.78 252.543   6
  -3  21   6 1422.59 252.623   6
  -3  21   7 2585.65 359.163   6
   3  21   7 2548.74 351.683   6
  -3 -21  -7 2224.26 384.743   1
   3 -21  -7 2329.36 299.120   1
   3 -21  -8 320.063 159.871   1
  -3  21   8 278.091 161.559   6
   3  21   8 368.593 189.009   6
   3 -21  -9 291.843 141.467   1
   3  21   9 311.001 184.045   6
  -3  21   9 245.630 130.486   6
   3 -21 -10 1311.59 272.216   1
   3  21  10 1245.27 259.963   2
  -3  21  10 1448.34 322.206   6
   3  21  10 1674.49 327.704   6
   3 -21 -11 327.071 194.315   1
  -3  21  11 490.844 220.594   6
   3  21  11 379.259 184.530   2
   3  21  11 357.391 136.963   6
  -3  21  12 667.551 264.711   6
   3  21  12 427.737 214.263   6
   3  21 -12 182.621 110.725   1
   3  21  12 195.508 157.137   2
   3  21  13 448.577 183.511   2
  -3  21  13 7.20573 168.594   6
   3  21  13 397.216 198.158   6
   3  21  14 285.652 171.785   6
  -3  21  14 203.890 213.391   6
   3  21  14 92.2771 130.804   2
   3  21  15 1235.36 330.372   6
   3  21  15 795.823 247.928   2
  -3  21  15 624.343 288.699   6
  -3  21  16 110.876 186.850   6
   3  21  16 134.091 160.406   6
   3  21  16 235.348 165.952   2
  -3  21  17 59.0434 108.252   2
  -3  21  17 312.363 187.437   6
   3  21  18 216.979 119.204   2
  -3  21  18 230.576 126.242   2
   3  23   0 796.335 177.886   4
   3 -23   0 687.132 200.012   1
   3 -23   1 5908.66 538.770   1
   3  23   1 5363.88 422.765   4
   3 -23  -1 5489.51 487.127   1
   3  23   2 939.004 201.915   4
   3 -23  -2 987.664 221.847   1
   3 -23  -3 3074.33 360.301   1
   3  23   3 2635.85 299.555   4
   3  23   3 2382.61 297.573   6
  -3  23   3 2903.17 365.442   6
  -3  23   4 198.922 134.001   6
   3 -23  -4 555.616 165.970   1
   3  23   4 461.794 146.823   4
  -3 -23  -4 492.161 167.062   1
   3  23   4 205.551 106.444   6
   3  23   5 1787.10 310.705   4
   3 -23  -5 1970.44 292.362   1
  -3  23   5 1976.64 312.285   6
  -3 -23  -5 2084.88 333.063   1
   3  23   5 2021.05 302.744   6
  -3 -23  -6 2035.45 347.074   1
   3 -23  -6 1625.23 259.193   1
   3  23   6 1875.41 287.666   6
  -3  23   6 1602.46 292.091   6
  -3 -23  -7 1578.59 308.699   1
   3 -23  -7 1787.75 292.642   1
  -3  23   7 1467.85 269.664   6
   3  23   7 1670.62 310.335   6
   3 -23  -8 4351.53 453.426   1
   3  23   8 4664.46 479.277   6
  -3  23   8 4732.37 531.906   6
   3 -23  -9 3194.10 433.696   1
   3  23   9 2694.86 333.529   2
   3  23   9 2909.36 413.096   6
  -3  23   9 3174.08 449.221   6
   3  23  10 2742.38 402.956   6
   3 -23 -10 2349.33 391.504   1
  -3  23  10 2389.62 387.656   6
   3  23  10 2614.85 355.626   2
   3 -23 -11-1.19687 140.020   1
   3  23  11 158.573 136.642   2
   3  23  11 348.982 218.384   6
  -3  23  11 301.368 237.322   6
   3  23  12 9484.11 708.518   2
  -3  23  12 8751.88 762.963   6
   3  23  12 9251.20 762.518   6
  -3  23  13 509.155 253.887   6
   3  23  13-5.18522 171.766   2
   3  23  13 237.196 158.549   6
  -3  23  14 258.916 170.588   6
   3  23  14 123.680 122.640   2
   3  23  14 106.310 154.685   6
   3  23  15 1310.92 300.723   2
   3  23  15 816.245 281.771   6
  -3  23  15 905.268 264.967   6
   3  23  16 1297.30 288.748   2
   3  23  16 885.788 241.795   6
  -3  23  16 1174.21 309.314   6
  -3  23  16 1375.91 278.582   2
   3  23  17 178.180 127.202   2
  -3  23  17 173.230 141.997   2
  -3  23  17 109.980 132.544   6
   3  23  18-160.962 134.035   2
  -3  23  18 49.7069 90.5145   2
   3  25   0 384.232 123.825   4
   3 -25   0 508.638 193.937   1
   3 -25   1 34295.2 1363.35   1
   3 -25  -1 35181.1 1306.96   1
   3  25   1 31503.6 1072.41   4
   3  25  -1 33141.7 1093.99   4
   3  25   2 2740.28 337.624   6
   3  25   2 3008.37 345.065   4
   3 -25  -2 2962.09 374.983   1
  -3  25   3 19076.6 952.129   6
   3  25   3 16968.0 819.419   6
   3 -25  -3 18622.0 920.970   1
   3  25   3 17829.4 823.242   4
   3  25   4 5707.55 486.705   6
  -3  25   4 5860.62 542.751   6
   3  25   4 5965.57 499.025   4
   3 -25  -4 6252.43 532.791   1
   3 -25  -5 2190.94 338.805   1
   3  25   5 1828.20 283.283   6
  -3 -25  -5 2276.92 369.195   1
  -3  25   5 1896.88 335.523   6
   3  25   5 1976.15 306.891   4
  -3  25   6 6324.03 564.501   6
   3 -25  -6 7085.04 573.595   1
   3  25   6 6497.70 535.713   6
  -3 -25  -6 8031.65 703.283   1
   3 -25  -7 6791.02 586.023   1
   3  25   7 7443.70 595.467   6
  -3  25   7 7148.34 612.648   6
  -3 -25  -7 8280.57 749.981   1
   3  25   8 13829.4 831.457   6
   3 -25  -8 13557.1 873.550   1
  -3  25   8 14230.1 898.172   6
  -3  25   9 599.004 237.260   6
   3 -25  -9 113.431 232.372   1
   3  25   9 181.956 155.235   6
   3 -25 -10 8043.94 790.960   1
   3  25  10 10653.9 776.342   6
  -3  25  10 9903.01 787.055   6
   3 -25 -11 1217.34 378.982   1
  -3  25  11 1237.33 285.135   6
   3  25  11 1732.87 358.588   6
   3  25  11 1973.62 337.514   2
   3  25  12 4737.00 539.866   6
  -3  25  12 3917.55 519.563   6
   3  25  12 4640.61 499.501   2
  -3  25  13 933.324 275.971   6
   3  25  13 1002.82 259.047   2
   3  25  13 1146.84 314.658   6
   3  25  14 10354.8 745.503   2
   3  25  14 9813.16 771.549   6
  -3  25  14 8357.49 740.635   6
   3  25  15 1365.57 337.640   6
   3  25  15 1422.48 266.737   2
  -3  25  15 1140.41 295.061   6
   3  25  16 1924.43 325.061   6
  -3  25  16 1616.26 319.825   6
   3  25  16 2136.07 311.211   2
  -3  25  16 2115.32 311.306   2
  -3  25  17 563.606 201.199   6
   3  25  17 690.904 181.651   2
  -3  25  17 1098.03 220.155   2
   3 -27   0 2100.17 383.333   1
   3  27   0 2088.29 296.208   4
   3  27   1 11824.8 706.425   6
   3 -27  -1 11864.4 868.398   1
   3  27   1 14574.2 751.870   4
   3  27  -1 13283.1 727.704   4
   3 -27  -2 1946.34 341.271   1
   3  27  -2 1733.06 281.475   4
   3  27   2 1564.40 280.703   6
   3  27   2 1583.52 269.449   4
   3  27   3 19605.6 898.489   4
  -3  27   3 17897.3 963.905   6
   3  27  -3 20509.7 894.621   4
   3  27   3 18993.8 893.636   6
   3 -27  -3 19631.6 1015.60   1
   3 -27  -4 4752.89 508.766   1
   3  27   4 4163.09 441.645   4
   3  27   4 4381.81 439.010   6
  -3  27   4 4725.53 534.926   6
   3  27  -4 5270.16 475.367   4
   3  27   5 5217.60 488.995   6
   3 -27  -5 4638.35 492.347   1
   3  27   5 5630.03 518.490   4
  -3  27   5 5162.80 528.034   6
   3  27   6 1308.84 279.711   6
   3 -27  -6 1273.95 279.735   1
  -3  27   6 1199.46 300.871   6
  -3  27   7 5017.21 549.148   6
   3 -27  -7 5000.61 552.011   1
   3  27   7 5145.69 507.937   6
   3  27   8 7390.34 626.877   6
  -3  27   8 7592.27 662.719   6
   3 -27  -8 7343.92 672.483   1
  -3  27   9 423.990 239.199   6
   3  27   9 79.1831 127.250   6
   3 -27  -9 166.544 164.231   1
   3  27  10 13718.9 880.865   6
  -3  27  10 14143.1 976.623   6
  -3  27  11 1529.57 381.559   6
   3  27  11 1239.51 302.858   6
  -3  27  12 6186.75 662.908   6
   3  27  12 6475.65 626.142   6
   3  27  13 1803.75 340.790   6
  -3  27  13 1449.01 349.624   6
   3  27  14 9800.79 745.680   6
  -3  27  14 8915.11 754.751   6
   3  27  15 1266.90 272.879   6
  -3  27  15 1273.78 312.742   6
   3  27  15 1314.60 269.393   2
  -3  27  15 1409.54 277.806   2
  -3  27  16 681.363 223.879   6
  -3  27  16 1239.98 247.150   2
   3  27  16 992.682 223.094   6
  -3  27  17 975.997 225.025   6
  -3  27  17 1160.43 214.587   2
   3 -29   0 173.523 208.888   1
   3  29   0 93.9775 98.2397   4
   3  29  -1 8396.59 618.463   4
   3  29   1 8124.82 611.818   6
   3  29   1 8596.94 605.338   4
   3 -29  -1 8134.50 745.258   1
   3 -29  -2 1673.68 354.705   1
   3  29   2 2152.62 301.310   4
   3  29   2 2081.17 315.405   6
   3  29  -2 2129.56 305.877   4
  -3  29   2 1634.44 323.755   6
   3  29   3 6261.46 525.657   6
   3  29  -3 6782.30 555.090   4
   3  29   3 6090.73 531.554   4
   3 -29  -3 6533.81 636.455   1
  -3  29   3 7164.23 637.636   6
   3 -29  -4 72.4725 137.811   1
   3  29  -4 176.575 123.472   4
   3  29   4 167.002 121.018   4
   3  29   4 291.098 166.420   6
  -3  29   4 378.847 272.015   6
   3 -29  -5 215.849 136.793   1
   3  29   5 74.9692 135.507   6
  -3  29   5 70.0116 177.438   6
   3  29  -5 383.023 154.559   4
   3 -29  -6 3138.84 422.332   1
  -3  29   6 3589.73 487.441   6
   3  29   7 436.823 193.032   6
  -3  29   7 269.108 167.198   6
   3 -29  -7 248.066 149.487   1
  -3  29   8 299.248 169.887   6
   3 -29  -8 785.986 274.908   1
   3  29   8 740.865 223.259   6
   3  29   9 553.745 218.728   6
   3 -29  -9 427.139 229.252   1
  -3  29   9 401.605 244.824   6
  -3  29  10 545.972 222.647   6
   3  29  10 1313.70 277.702   6
   3  29  11 114.478 137.396   6
  -3  29  11 454.767 246.950   6
   3  29  12 11274.3 831.392   6
  -3  29  12 10420.8 837.486   6
   3  29  13 634.458 245.226   6
  -3  29  13 760.218 254.808   6
   3  29  14 28.5075 132.708   6
  -3  29  14 357.501 199.940   6
   3  29  15 727.405 206.020   6
  -3  29  15 1398.41 261.689   2
  -3  29  15 894.294 234.191   6
  -3  29  16 801.711 235.230   6
  -3  29  16 660.660 152.804   2
   3  29  16 332.893 159.604   6
  -3  29  17 205.447 112.524   6
   3  31   0 264.169 187.817   6
   3  31   0-109.734 135.683   4
   3  31   1 1472.21 282.868   6
   3  31  -1 1423.39 276.473   4
   3 -31  -1 1545.07 383.615   1
   3  31   1 1580.56 273.773   4
   3 -31  -2 9.03699 172.134   1
   3  31  -2-110.990 128.214   4
   3  31   2-114.440 152.082   6
   3  31   2 312.704 183.349   4
  -3  31   2-33.3669 174.607   6
  -3  31   3 1815.69 383.916   6
   3  31  -3 2920.99 369.866   4
   3 -31  -3 2414.55 439.241   1
   3  31   3 2657.77 378.084   4
   3  31   3 2776.75 376.985   6
   3  31  -4 156.019 125.916   4
   3  31   4 31.8158 213.804   6
  -3  31   4 28.9908 152.900   6
   3 -31  -4 33.8358 162.777   1
   3  31   4 424.676 174.000   4
  -3  31   5 2149.05 360.539   6
   3 -31  -5 2391.86 409.132   1
   3  31  -5 2913.07 377.307   4
   3  31   5 2394.61 348.351   6
   3 -31  -6 2586.70 434.218   1
   3  31   6 2865.42 381.818   6
  -3  31   6 2426.40 448.510   6
   3  31   7 5761.65 556.686   6
  -3  31   7 5951.12 594.620   6
   3 -31  -7 5052.06 613.906   1
   3  31   8 1700.65 312.841   6
  -3  31   8 1917.83 411.046   6
  -3  31   9 545.526 277.328   6
   3  31   9 416.460 191.506   6
   3  31  10 1003.19 264.006   6
  -3  31  10 677.439 214.709   6
   3  31  11 65.7181 158.644   6
  -3  31  11 1532.42 379.957   6
  -3  31  12 108.891 138.974   6
   3  31  12 97.3850 144.255   6
  -3  31  13 191.445 143.411   6
   3  31  13-21.7905 117.950   6
  -3  31  14-41.5817 116.501   2
  -3  31  14 93.0173 162.918   6
   3  31  14 205.449 155.650   6
   3  31  15 113.632 95.0388   6
  -3  31  15 353.121 125.305   6
  -3  31  16 233.308 131.660   6
   3  33   0 934.221 262.677   6
   3  33   0 668.005 197.610   4
   3  33   1 12984.3 837.024   6
   3  33  -1 12555.2 804.464   4
   3  33   1 12804.4 805.079   4
  -3  33   1 12110.4 854.213   6
   3  33   2 4817.78 511.800   6
   3 -33  -2 4924.88 661.163   1
   3  33   2 4638.78 497.564   4
   3  33  -2 5098.99 495.251   4
  -3  33   3 2915.24 475.298   6
   3  33   3 3065.20 401.631   6
   3  33  -3 3425.63 401.749   4
   3 -33  -3 2841.46 467.874   1
   3  33   3 3479.32 437.144   4
   3 -33  -4-240.072 223.448   1
   3  33   4 167.890 148.956   6
  -3  33   4 110.369 173.804   6
   3  33  -4 74.0651 121.035   4
   3  33   5 5383.48 526.873   6
  -3  33   5 5229.78 599.727   6
   3  33  -5 5353.00 484.199   4
   3 -33  -5 4313.99 588.013   1
  -3  33   6 7126.55 679.793   6
   3  33   6 6470.66 616.404   6
   3  33   7 2248.56 360.176   6
  -3  33   7 10244.9 1032.69   6
  -3  33   8 7821.52 710.907   6
   3  33   8 6816.62 624.083   6
  -3  33   9 1709.15 371.573   6
   3  33   9 1488.27 316.013   6
   3  33  10 3853.85 466.997   6
  -3  33  10 3850.12 500.480   6
  -3  33  11-96.5724 185.349   6
   3  33  11 362.133 178.628   6
   3  33  12 3393.29 451.078   6
  -3  33  12 3249.05 441.807   6
  -3  33  13 226.651 177.816   6
   3  33  13-6.67224 126.183   6
   3  33  14 1513.71 282.576   6
  -3  33  14 1461.94 275.359   6
   3  33  15 2442.77 300.292   6
  -3  33  15 876.644 230.109   6
   3  35   0 730.320 223.148   4
   3  35   0 761.921 294.223   6
  -3  35   1 30851.0 1359.03   6
   3  35  -1 35023.2 1410.61   6
   3  35   1 33019.4 1341.63   6
   3  35  -1 31507.3 1294.69   4
   3  35   1 31391.3 1313.27   4
   3  35  -2 1052.71 262.292   4
  -3  35   2 886.753 307.463   6
   3  35   2 1217.86 312.482   6
   3  35   2 1102.82 261.569   4
   3  35   3 270.673 183.472   6
  -3  35   3 353.686 223.576   6
   3  35  -3 261.689 157.399   4
   3  35   4 3935.47 461.585   6
   3  35  -4 4366.50 439.408   4
  -3  35   4 4037.18 515.729   6
  -3  35   5 10149.2 776.859   6
   3  35  -5 9196.33 613.854   4
   3  35   5 9995.35 738.927   6
   3  35   6 3306.54 427.799   6
  -3  35   6 3307.28 451.906   6
  -3  35   7 2160.62 383.265   6
   3  35   7 2634.78 381.160   6
  -3  35   8 7872.46 690.895   6
   3  35   8 7741.58 656.233   6
  -3  35   9 1403.31 298.778   6
   3  35   9 1352.00 303.448   6
   3  35  10 6342.28 590.546   6
  -3  35  10 6554.67 636.607   6
   3  35  11 486.250 213.585   6
  -3  35  11 681.155 262.851   6
   3  35  12 5029.41 486.228   6
  -3  35  12 5048.76 523.819   6
   3  35  13 690.938 205.969   6
  -3  35  13 442.813 180.680   6
  -3  35  14 2847.93 363.549   6
   3  35  14 2063.09 286.307   6
   3  37   0 1926.78 364.361   6
  -3  37   0 2067.55 372.168   6
   3  37   0 2104.79 370.237   4
   3  37   1 4032.09 477.000   6
   3  37  -1 3863.86 466.440   6
   3  37  -1 3746.79 461.645   4
  -3  37   1 3163.04 434.815   6
   3  37  -2 1507.53 306.607   6
  -3  37   2 1173.82 306.125   6
   3  37  -2 1194.01 267.688   4
   3  37   2 1261.53 265.384   6
   3  37   3 8031.35 644.598   6
  -3  37   3 8403.77 722.960   6
   3  37  -3 8367.72 656.114   4
   3  37   4 2232.57 361.041   6
  -3  37   4 2291.25 385.844   6
   3  37  -4 2779.19 378.151   4
   3  37   5 366.642 165.858   6
  -3  37   5 139.557 132.699   6
   3  37   6 1208.87 289.215   6
  -3  37   6 1007.08 261.050   6
   3  37   7 865.732 225.369   6
  -3  37   7 1258.02 358.991   6
  -3  37   8 2422.47 396.700   6
   3  37   8 2391.53 370.389   6
  -3  37   9 768.079 243.657   6
   3  37   9 715.136 181.933   6
   3  37  10 1792.28 311.225   6
  -3  37  10 1803.94 331.872   6
  -3  37  11 169.690 146.708   6
   3  37  11 312.310 145.459   6
   3  37  12 1989.66 302.486   6
  -3  37  12 2402.46 358.585   6
   3  37  13 245.351 145.544   6
  -3  37  13 459.097 163.548   6
   3  39   0 484.059 147.167   6
  -3  39   0 795.984 257.574   6
   3  39  -1 490.022 189.835   6
   3  39   1 624.284 194.215   6
  -3  39  -1 519.960 196.482   6
  -3  39   1 465.500 175.237   6
  -3  39   2 10.7869 131.559   6
   3  39  -2 120.415 144.815   4
   3  39   2 303.604 163.984   6
   3  39  -2 386.605 202.052   6
   3  39   3-4.77449 129.694   6
   3  39  -3 168.753 111.227   4
  -3  39   3 134.633 136.134   6
   3  39  -3 135.873 129.186   6
   3  39   4 384.737 187.080   6
   3  39  -4 105.471 102.075   4
  -3  39   4 210.728 160.375   6
  -3  39   5 188.999 178.397   6
   3  39   5 153.882 158.285   6
  -3  39   6 405.604 184.883   6
   3  39   6 437.945 184.450   6
  -3  39   7 181.728 185.214   6
   3  39   7-78.4414 122.324   6
  -3  39   8 246.338 193.206   6
   3  39   8 294.259 138.365   6
  -3  39   9 138.143 182.852   6
   3  39   9 464.624 221.614   6
  -3  39  10 93.3368 146.339   6
   3  39  10-53.1192 92.7462   6
  -3  39  11 143.920 149.869   6
   3  39  11-77.9020 123.226   6
  -3  39  12 274.310 139.704   6
  -3  41   0 3440.75 444.377   6
   3  41   1 5761.21 539.839   6
  -3  41  -1 5653.93 551.063   6
  -3  41   1 5795.17 576.673   6
  -3  41  -2 224.526 171.334   6
  -3  41   2 437.170 185.498   6
   3  41   2 127.320 128.963   6
  -3  41   3 2986.13 392.287   6
   3  41   3 2796.01 390.699   6
  -3  41   4 843.539 237.808   6
   3  41   4 1124.56 292.935   6
   3  41   5 1622.45 384.859   6
  -3  41   5 1240.46 277.539   6
  -3  41   6 1081.40 260.788   6
   3  41   6 854.610 218.729   6
   3  41   7 1590.54 270.353   6
  -3  41   7 1447.61 289.847   6
   3  41   8 1826.17 307.404   6
  -3  41   8 2335.20 355.848   6
   3  41   9 368.495 162.314   6
  -3  41   9 365.585 185.807   6
  -3  41  10 1905.91 302.822   6
  -3  41  11 22.3358 94.3671   6
  -3  43   0 1087.54 276.040   6
  -3  43  -1 8719.91 656.352   6
  -3  43   1 8626.01 641.476   6
  -3  43   2 1266.48 264.749   6
  -3  43  -2 1224.15 245.754   6
  -3  43   3 3217.20 396.883   6
  -3  43  -3 3334.15 431.195   6
  -3  43   4 1713.87 297.447   6
  -3  43  -4 1844.40 316.652   6
  -3  43   5 2525.02 364.878   6
  -3  43   6 2000.52 304.764   6
  -3  43   7 2374.37 348.268   6
  -3  43   8 5592.80 491.156   6
  -3  43   9 1027.78 218.739   6
  -3  43  10 2800.05 325.353   6
  -3  45   0 615.063 204.351   6
  -3  45   1 2670.79 344.105   6
  -3  45  -1 3165.12 383.017   6
  -3  45  -2 805.764 226.802   6
  -3  45   2 299.565 120.765   6
  -3  45   3 2139.96 298.898   6
  -3  45  -3 2076.93 291.751   6
  -3  45  -4 922.128 204.486   6
  -3  45   4 829.206 204.662   6
  -3  45  -5 1752.20 286.142   6
  -3  45   5 1775.32 284.038   6
  -3  45   6 1676.19 263.091   6
  -3  45  -6 2111.87 279.903   6
  -3  45   7 1308.21 244.362   6
  -3  45  -7 1048.14 193.196   6
  -3  45   8 1925.08 268.450   6
  -3  45  -8 1635.30 228.204   6
  -3  47   0 57.9860 98.0634   6
  -3  47  -1-35.6186 96.7846   6
  -3  47   1 31.2425 95.1513   6
  -3  47  -2 139.736 111.990   6
  -3  47   2-170.953 125.175   6
  -3  47   3-11.2647 94.6263   6
  -3  47  -3 248.298 99.9468   6
  -3  47  -4 32.4945 81.0705   6
  -3  47   4 113.396 92.9733   6
  -3  47   5 66.8051 88.6154   6
  -3  47  -5 182.080 168.618   6
  -3  47   6 221.278 109.708   6
   4   0   0 298.731 41.6895   1
   4   0   1 2110.82 81.8133   1
   4   0  -1 1996.65 111.969   1
   4   0  -2 352794. 1555.79   1
   4   0  -3 10889.2 304.556   1
   4   0  -4 17075.9 415.386   1
   4   0  -5 13777.1 407.920   1
   4   0  -6 3343.75 224.450   1
   4   0  -7 19987.3 566.703   1
   4   0  -8 5672.14 334.168   1
   4   0  -9 4435.75 328.497   1
   4   0   9 4249.57 391.078   2
   4   0  10 280.106 124.927   2
   4   0 -10 78.7013 73.3467   1
   4   0  11 5539.39 498.153   2
  -4   0  11 5204.72 484.372   6
   4   0 -11 5691.24 427.025   1
   4   0  12-78.5651 128.843   2
   4   0 -12 100.783 92.8215   1
   4   0 -13 8740.41 591.646   1
   4   0  13 9455.23 702.635   2
   4   0  14 3116.28 450.833   2
   4   0  15 17072.9 1011.86   2
  -4   0  16 11025.7 788.353   2
   4   0  16 10864.0 818.133   2
  -4   0  17 7580.18 649.160   2
   4   0  17 8006.99 696.274   2
   4   0  18 824.054 249.743   2
  -4   0  18 686.349 203.151   2
   4   0  19 1598.38 314.172   2
  -4   0  19 1125.18 256.147   2
   4   0  20 672.842 214.924   2
  -4   0  20 440.771 130.790   2
   4  -2   0 74935.9 582.996   1
   4  -2  -1 1036.46 85.8410   1
   4  -2   1 1294.75 71.9076   1
   4  -2  -2 234.495 57.8226   1
   4  -2   2 184.710 30.9402   1
   4  -2  -3 42518.4 595.219   1
   4  -2  -4 110862. 1056.23   1
   4   2  -4 114022. 1085.27   1
   4  -2  -5 33243.5 627.826   1
   4   2  -5 32041.7 625.200   1
   4  -2  -6 10320.0 379.230   1
   4   2  -6 10889.9 393.337   1
   4   2  -7 662.460 117.924   1
   4  -2  -7 358.626 84.3070   1
   4  -2  -8 217.465 123.104   1
   4   2  -8 40.6141 62.9306   1
   4  -2   9 526.466 156.000   2
   4   2  -9 555.678 135.566   1
   4  -2  -9 726.120 133.831   1
   4   2   9 654.243 188.861   2
   4   2  10 59.0132 124.402   2
   4  -2  10 29.6818 137.191   2
   4   2 -10-23.6585 75.9871   1
  -4  -2  10-135.616 100.116   6
   4  -2 -10 26.3013 69.5776   1
   4   2  10-27.6930 131.442   6
  -4   2  10-252.416 145.467   6
  -4   2  11 2557.89 345.480   6
   4   2  11 2907.11 369.156   2
   4  -2  11 3128.42 403.187   2
   4   2 -11 2624.93 285.224   1
   4  -2 -11 3009.17 315.543   1
  -4   2  12 173.883 138.753   6
   4  -2  12 334.840 181.327   2
   4   2 -12 361.792 158.794   1
   4  -2 -12 465.542 156.639   1
   4   2  12 241.129 170.883   2
   4   2  13 7979.79 650.476   2
   4  -2 -13 6992.59 530.626   1
   4  -2  13 7517.18 636.435   2
   4   2 -13 7422.13 556.371   1
  -4   2  13 7101.38 643.422   6
   4  -2  14 2528.60 405.208   2
   4   2  14 1691.31 310.409   2
   4  -2  15 7123.76 676.878   2
   4   2  15 7170.37 653.711   2
   4   2  16 3923.89 488.616   2
  -4  -2  16 3789.08 462.117   2
   4  -2  16 3417.08 446.040   2
  -4   2  17 1714.74 320.556   2
   4   2  17 1677.66 336.720   2
  -4  -2  17 2004.76 357.409   2
   4  -2  17 1644.10 336.454   2
   4   2  18 4102.34 481.018   2
  -4  -2  18 4516.16 484.922   2
   4  -2  18 4501.53 519.659   2
  -4   2  18 4224.81 492.011   2
  -4   2  19 93.6941 138.038   2
   4   2  19 41.4877 124.300   2
   4  -2  19 226.219 165.917   2
  -4  -2  19 163.492 122.702   2
   4   2  20-19.6894 156.179   2
   4  -2  20 52.8416 129.593   2
  -4   2  20-16.8858 99.5452   2
   4  -4   0 48375.4 524.900   1
   4  -4   1 3251.58 131.757   1
   4  -4  -1 2853.98 138.060   1
   4  -4  -2 47228.7 583.720   1
   4  -4   2 48170.3 508.141   1
   4  -4  -3 3259.43 174.643   1
   4  -4  -4 29538.4 542.199   1
  -4  -4  -5 3255.58 144.696   1
   4  -4  -5 5030.76 244.985   1
   4  -4  -6 176.237 71.6370   1
  -4   4  -6 151.891 36.9505   1
  -4  -4  -6 99.3620 31.9985   1
   4   4  -6 238.399 78.7526   1
   4   4  -7 4788.42 291.938   1
   4  -4  -7 5151.61 286.378   1
   4  -4  -8 2001.64 198.742   1
   4   4  -8 1726.00 201.464   1
   4   4  -9 13227.5 575.177   1
   4  -4  -9 13684.6 552.206   1
   4  -4   9 12767.3 674.658   2
   4   4   9 13325.3 665.210   2
   4   4 -10 107.774 103.766   1
   4  -4 -10 115.336 79.1439   1
   4   4  10-115.460 122.973   2
  -4   4  10 112.437 144.178   6
   4  -4  10-1.23854 152.143   2
   4   4  10 71.8321 144.404   6
  -4   4  11 1332.43 257.800   6
   4  -4 -11 1159.42 202.044   1
   4   4  11 1393.20 247.033   2
   4   4  11 1398.59 277.721   6
   4   4 -11 1364.48 223.157   1
   4  -4  11 1438.15 294.391   2
   4   4 -12-8.83432 81.6643   1
  -4   4  12-88.0426 148.939   6
   4  -4  12-10.8629 145.135   2
   4  -4 -12 9.76755 112.695   1
   4   4  12 9.81483 134.691   2
   4   4 -13 215.492 149.084   1
   4  -4  13-199.515 149.357   2
   4   4  13-169.166 155.215   2
  -4   4  13 363.061 210.126   6
   4  -4 -13 76.6758 109.529   1
  -4   4  14 777.943 289.350   6
   4  -4  14 871.876 294.685   2
   4   4  14 757.013 233.378   2
  -4  -4  15 2788.30 396.330   2
   4  -4  15 2421.79 408.878   2
   4   4  15 2776.85 434.027   2
  -4  -4  16 1872.45 343.370   2
   4   4  16 2254.11 384.410   2
   4  -4  16 2193.86 422.199   2
  -4   4  17 4558.74 520.622   2
  -4  -4  17 4314.68 488.631   2
   4   4  17 4104.16 508.377   2
   4  -4  17 4096.36 530.859   2
   4   4  18 94.3845 131.139   2
   4  -4  18 436.259 234.019   2
  -4  -4  18 136.395 147.557   2
  -4   4  18-110.890 199.235   2
   4  -4  19 101.107 139.931   2
   4   4  19 267.490 184.273   2
  -4   4  19 507.832 200.861   2
   4  -4  20 2114.87 337.951   2
   4   4  20 2594.80 340.334   2
  -4   4  20 2181.04 330.127   2
   4  -6   0 110528. 900.279   1
   4  -6   1 3436.05 165.895   1
   4  -6  -1 3328.47 162.363   1
   4  -6  -2 24561.3 445.691   1
   4  -6   2 24029.1 464.453   1
   4  -6   3 16865.8 423.899   1
   4  -6  -3 17033.4 392.774   1
   4  -6  -4 36323.8 610.886   1
  -4  -6  -4 38540.9 625.016   1
  -4  -6  -5 389.332 77.5762   1
   4  -6  -5 478.617 91.7796   1
   4  -6  -6 1356.27 144.221   1
  -4  -6  -6 1142.14 109.945   1
   4   6  -7 2160.84 211.728   1
   4  -6  -7 2226.12 201.871   1
   4   6  -8 380.285 110.762   1
   4  -6  -8 544.474 121.763   1
  -4   6   9 38397.9 1218.88   6
   4  -6   9 40918.7 1227.37   2
   4  -6  -9 39334.7 931.837   1
   4   6   9 40815.9 1124.22   2
   4   6  -9 41130.3 1019.07   1
   4   6   9 40378.9 1267.80   6
   4  -6 -10 5093.27 367.263   1
  -4   6  10 5447.15 495.672   6
   4   6  10 4865.46 431.093   2
   4  -6  10 5397.22 484.663   2
   4   6  10 5552.08 506.558   6
   4   6 -10 5348.39 389.092   1
   4   6  11 34971.3 1188.35   2
   4   6  11 36295.4 1354.58   6
  -4   6  11 36760.2 1333.49   6
   4  -6  11 37247.3 1318.64   2
   4   6 -11 36172.1 1125.68   1
   4  -6 -11 36373.0 1073.83   1
   4   6  12 704.296 179.964   2
   4   6  12 767.904 254.654   6
   4  -6  12 847.785 244.181   2
  -4   6  12 539.111 194.851   6
   4   6 -12 906.595 210.252   1
   4  -6 -12 441.369 143.117   1
  -4   6  13 7359.41 671.913   6
   4  -6  13 6920.45 621.339   2
   4   6  13 7013.66 605.523   2
   4  -6 -13 6547.46 536.972   1
   4   6 -13 5922.86 505.702   1
  -4   6  14 1475.90 322.864   6
  -4  -6  14 1439.93 266.477   2
   4  -6  14 999.820 277.042   2
   4   6  14 1112.42 269.519   2
  -4  -6  15-181.613 167.075   2
  -4   6  15 168.752 197.320   6
   4  -6  15 300.083 203.587   2
   4   6  15-134.262 207.342   2
   4  -6  16 3298.66 484.330   2
   4   6  16 3721.04 472.790   2
  -4   6  17-200.913 164.587   2
   4   6  17-410.774 253.846   2
   4  -6  17-75.0032 152.495   2
   4  -6  18 1426.69 335.197   2
  -4   6  18 1407.46 303.871   2
   4   6  18 1561.27 312.615   2
   4  -6  19 1442.08 312.640   2
   4   6  19 1648.54 316.149   2
  -4   6  19 1441.17 290.530   2
   4   6  20 5839.27 514.047   2
  -4   6  20 4607.84 460.811   2
   4  -6  20 4419.89 451.196   2
   4  -8   0 196976. 1373.74   1
   4  -8   1 4248.72 213.250   1
   4  -8  -1 3988.90 201.410   1
   4  -8  -2 13705.2 372.693   1
   4  -8   2 15266.9 419.833   1
   4  -8   3 905.125 139.594   1
   4  -8  -3 965.729 110.013   1
   4  -8  -4 16936.3 443.904   1
  -4  -8  -4 17565.8 507.358   1
  -4  -8  -5 4642.13 239.226   1
   4  -8  -5 4620.22 241.067   1
  -4  -8  -6 701.523 105.114   1
   4  -8  -6 658.406 110.826   1
   4  -8  -7 2897.84 225.874   1
   4  -8  -8 3218.68 261.010   1
   4   8  -8 3478.41 293.029   1
   4   8   9 18801.6 770.640   2
   4  -8   9 18432.5 810.529   2
   4   8   9 19556.5 892.525   6
   4  -8  -9 19913.5 688.057   1
   4   8  -9 19756.9 719.557   1
  -4   8   9 19584.4 886.952   6
   4   8  10 1068.86 261.207   6
  -4   8  10 1137.61 279.600   6
   4   8 -10 1395.56 220.401   1
   4   8  10 1212.84 260.407   2
   4  -8  10 1138.90 256.555   2
   4  -8 -10 1223.02 207.956   1
   4   8  11 68504.1 1670.91   2
  -4   8  11 70318.7 1882.96   6
   4  -8  11 65881.5 1739.82   2
   4   8  11 74008.0 1936.57   6
   4   8 -11 69274.8 1558.42   1
   4  -8 -11 69982.6 1496.65   1
  -4   8  12 756.390 241.314   6
   4   8 -12 675.943 168.835   1
   4  -8  12 1067.49 284.548   2
   4   8  12 693.890 207.947   2
   4  -8 -12 651.134 194.743   1
   4   8  12 1021.47 271.724   6
   4   8  13 7548.96 694.209   6
   4  -8 -13 6286.73 519.908   1
   4  -8  13 6798.59 623.763   2
   4   8  13 6780.47 603.269   2
   4   8 -13 5100.91 500.066   1
  -4   8  13 7014.95 648.170   6
   4  -8  14-81.8661 151.249   2
   4   8  14-287.269 176.491   2
  -4   8  14 165.205 169.398   6
   4  -8  15 919.000 248.382   2
   4   8  15 817.095 241.566   2
  -4   8  15 1289.54 372.175   6
   4  -8  16 669.180 265.619   2
   4   8  16 919.059 266.378   2
   4   8  17 1834.76 361.069   2
   4  -8  17 1710.00 342.760   2
  -4   8  17 2264.42 387.660   2
   4  -8  18 5917.73 602.320   2
  -4   8  18 6997.19 611.742   2
   4   8  18 6660.80 607.605   2
   4  -8  19 968.918 239.124   2
   4   8  19 1541.13 291.780   2
  -4   8  19 1469.02 283.653   2
  -4   8  20 6142.45 529.179   2
   4   8  20 6693.11 539.885   2
   4 -10   0 89144.6 1056.81   1
   4 -10   1 865.086 126.640   1
   4 -10  -1 951.712 125.094   1
   4 -10  -2 29590.5 583.767   1
   4 -10   2 27138.0 648.357   1
   4 -10  -3 12851.1 396.368   1
   4 -10   3 12680.6 490.629   1
   4 -10  -4 11107.0 378.659   1
  -4 -10  -4 10866.2 462.758   1
  -4 -10  -5 1050.91 139.586   1
   4 -10  -5 1116.98 137.330   1
   4 -10  -6 1034.17 135.347   1
  -4 -10  -6 1140.06 144.735   1
  -4 -10  -7 2435.55 199.544   1
   4 -10  -7 2650.49 223.348   1
   4 -10  -8 310.793 97.1264   1
   4  10   9 34594.8 1217.15   6
   4 -10  -9 33010.0 894.211   1
   4  10   9 33724.9 1047.46   2
   4  10  -9 35081.5 998.273   1
  -4  10   9 36155.1 1237.35   6
  -4  10  10 1450.72 293.737   6
   4 -10 -10 1215.30 207.030   1
   4 -10  10 1136.48 240.519   2
   4  10  10 1435.41 284.110   6
   4  10  10 1175.53 223.677   2
   4  10 -10 1401.22 226.137   1
   4 -10  11 68174.9 1772.69   2
   4  10  11 66984.4 1656.14   2
   4 -10 -11 69195.9 1549.83   1
   4  10  11 70373.1 1902.90   6
   4  10 -11 67151.0 1565.13   1
  -4  10  11 72166.0 1949.31   6
   4 -10 -12 1607.49 289.302   1
   4 -10  12 1275.13 301.955   2
   4  10  12 1486.55 268.990   2
   4  10 -12 1150.59 220.115   1
  -4  10  12 1452.50 341.677   6
   4  10  12 1326.47 303.760   6
   4 -10  13 7155.17 642.539   2
   4  10  13 6629.51 625.119   2
   4 -10 -13 6485.42 553.321   1
  -4  10  13 7833.07 707.470   6
   4  10  13 8413.25 734.112   6
   4  10 -13 6057.80 563.055   1
   4  10  14 1911.69 423.901   6
   4  10  14 1142.10 295.561   2
   4 -10  14 1491.61 330.536   2
  -4  10  14 1255.39 351.044   6
   4 -10  15 83.3786 176.737   2
  -4  10  15 173.093 160.577   6
   4 -10  16 130.694 168.441   2
  -4  10  16-199.062 226.719   6
   4  10  16 291.269 203.225   2
   4  10  17 1786.41 359.412   2
  -4  10  17 1644.73 332.628   2
   4 -10  17 1435.23 328.516   2
   4 -10  18 1989.17 359.157   2
   4  10  18 2310.60 375.125   2
  -4  10  18 2651.70 390.264   2
   4  10  19 976.146 220.016   2
  -4  10  19 1411.79 289.348   2
   4  10  20 7920.21 576.445   2
  -4  10  20 7752.13 579.962   2
   4 -12   0 51812.2 906.932   1
   4 -12  -1 3729.31 247.374   1
   4 -12   1 4060.25 272.441   1
   4 -12  -2 677.056 109.489   1
   4 -12   2 675.621 141.802   1
   4 -12  -3 20.5551 59.4619   1
  -4 -12  -3-37.7664 91.4228   1
   4 -12   3 7.93284 106.388   1
   4 -12  -4 44.9472 54.1680   1
  -4 -12  -4 47.6223 82.0023   1
  -4 -12  -5 2353.98 248.142   1
   4 -12  -5 2579.19 208.087   1
  -4 -12  -6 36971.4 853.669   1
   4 -12  -6 34349.7 773.619   1
  -4 -12  -7 6234.10 369.003   1
   4 -12  -7 6557.67 360.779   1
  -4  12   8 1318.07 245.538   6
   4 -12  -8 1201.26 168.084   1
   4  12   9 26210.3 1091.87   6
   4 -12  -9 24827.9 814.864   1
   4  12   9 24072.7 891.215   2
  -4  12   9 26786.5 1075.11   6
  -4  12  10 4732.52 500.124   6
   4 -12  10 3253.18 379.016   2
   4  12  10 4404.96 474.859   6
   4  12 -10 3866.25 375.936   1
   4  12  10 4671.14 435.276   2
   4 -12 -10 4108.94 367.180   1
   4 -12  11 9211.96 639.480   2
   4  12  11 10256.5 654.271   2
  -4  12  11 9743.31 738.731   6
   4  12 -11 9359.60 572.726   1
   4  12  11 9756.77 727.464   6
   4 -12 -11 8330.69 577.374   1
   4  12  12 267.062 223.580   6
  -4  12  12 217.002 181.820   6
   4 -12  12 205.239 183.955   2
   4  12  12 349.743 195.361   2
   4 -12 -12 163.324 151.028   1
   4  12 -12 42.0160 82.4621   1
   4  12 -13 554.992 191.976   1
   4  12  13 961.862 272.681   6
   4 -12  13 935.459 245.135   2
  -4  12  13 842.266 257.295   6
   4 -12 -13 849.279 261.452   1
   4  12  13 237.622 138.107   2
  -4  12  14 601.482 290.356   6
   4  12  14 276.859 173.867   6
   4 -12  14 601.796 229.064   2
   4  12  15 758.627 278.082   2
  -4  12  15 914.292 234.277   6
   4 -12  15 812.710 248.214   2
   4 -12  16 433.316 221.646   2
  -4  12  16 95.8558 153.383   6
   4  12  16 681.752 235.525   2
   4  12  17 153.223 145.167   2
   4 -12  17-35.2210 131.627   2
  -4  12  18 241.860 148.352   2
   4  12  18 517.753 206.636   2
  -4  12  19 451.069 193.789   2
   4  12  19 260.863 178.284   2
   4  12  20 1119.64 218.088   2
  -4  12  20 1107.15 249.394   2
   4 -14   0 32246.6 797.979   1
   4 -14   1 69.0839 90.1289   1
   4 -14  -1 12.5818 83.6139   1
   4 -14   2 1359.54 178.585   1
   4 -14  -2 1646.02 181.728   1
   4 -14   3 2656.96 289.986   1
   4 -14  -3 2971.63 226.151   1
  -4 -14  -4 15215.6 639.256   1
   4 -14  -4 15432.7 520.077   1
  -4 -14  -5 48235.7 1146.87   1
   4 -14  -5 49798.5 955.111   1
  -4 -14  -6 17010.0 663.599   1
   4 -14  -6 16053.6 557.442   1
  -4 -14  -7 9150.88 494.686   1
   4 -14  -7 8348.32 437.793   1
  -4  14   7 9816.69 605.436   6
   4  14   8 36.8264 135.795   6
  -4  14   8 41.9832 100.225   6
   4 -14   9 4366.98 410.099   2
   4 -14  -9 5717.33 412.942   1
   4  14   9 5624.87 441.232   2
   4  14   9 6171.61 538.662   6
  -4  14   9 6127.35 530.470   6
   4  14  10 166.348 134.491   6
   4  14  10 189.540 116.371   2
   4 -14  10 17.5953 114.618   2
   4 -14 -10 269.972 119.417   1
   4  14 -10 316.532 134.538   1
  -4  14  10 512.824 211.027   6
   4  14  11 2815.98 407.414   6
   4  14  11 2723.92 357.978   2
   4  14 -11 2441.33 293.539   1
  -4  14  11 3111.23 422.120   6
   4 -14 -11 2695.72 330.705   1
   4 -14  11 2399.56 348.988   2
   4 -14 -12 689.571 205.804   1
   4  14 -12 404.387 196.240   1
   4  14  12 787.292 248.833   2
   4 -14  12 249.749 172.276   2
  -4  14  12 486.114 222.841   6
   4  14  12 557.354 234.472   6
   4  14 -13 1459.98 275.428   1
  -4  14  13 2627.44 412.241   6
   4  14  13 2702.03 430.391   6
   4 -14  13 2174.42 352.026   2
   4  14  13 2557.53 380.664   2
   4  14  14 4077.42 543.881   6
   4  14  14 3820.15 456.125   2
   4 -14  14 3177.79 458.452   2
  -4  14  14 3760.17 511.251   6
   4  14  15 4083.90 472.837   2
  -4  14  15 3785.03 535.356   6
   4  14  15 4092.06 536.943   6
  -4  14  16 5909.48 638.722   6
   4  14  16 5775.66 585.492   2
   4  14  17 2176.35 368.469   2
  -4  14  18 93.5267 128.552   2
   4  14  18 146.278 162.495   2
   4  14  19 4.82316 121.359   2
  -4  14  19 327.752 156.346   2
  -4  14  20-2.25053 85.5401   2
   4 -16   0 4628.25 353.247   1
   4 -16  -1 208.067 105.728   1
   4 -16   1 207.155 116.500   1
   4 -16  -2 350.867 104.824   1
   4 -16   2 539.575 159.141   1
   4 -16  -3 4722.51 318.702   1
   4 -16   3 4664.01 390.361   1
   4 -16  -4 165766. 1860.72   1
  -4 -16  -4 170350. 2191.53   1
   4 -16  -5 43290.6 963.305   1
  -4 -16  -5 43621.2 1153.96   1
   4 -16  -6 27571.4 789.510   1
  -4  16   6 26655.3 983.833   6
  -4 -16  -6 27475.7 945.921   1
  -4 -16  -7 24069.5 926.032   1
   4  16   7 24122.0 960.010   6
   4 -16  -7 26055.3 811.613   1
  -4  16   8 1229.43 271.171   6
   4 -16  -8 1046.97 182.443   1
   4  16   8 849.406 197.456   6
   4  16   9 2583.13 364.215   6
  -4  16   9 2863.81 386.466   6
   4  16   9 2231.33 285.265   2
   4 -16  -9 2394.27 283.150   1
   4  16  10 589.768 204.868   6
   4 -16 -10 392.871 148.384   1
   4  16  10 155.751 113.760   2
  -4  16  10 181.093 144.701   6
   4  16  11 336.144 181.719   6
  -4  16  11 282.348 171.143   6
   4  16  11 321.190 168.687   2
   4 -16 -11 293.390 133.110   1
   4  16 -11 249.339 114.867   1
   4  16  12 487.546 188.633   2
  -4  16  12 593.592 239.938   6
   4 -16 -12 601.288 214.541   1
   4  16 -12 469.632 162.967   1
   4  16  12 443.089 225.969   6
   4  16  13 12210.2 873.207   6
  -4  16  13 11867.9 886.542   6
   4  16  13 12151.8 796.624   2
   4  16  14 1888.18 369.071   6
  -4  16  14 2060.14 390.119   6
   4  16  14 1607.82 282.327   2
   4  16  15 18823.6 1114.23   6
   4  16  15 19039.5 1033.72   2
  -4  16  15 17041.5 1082.34   6
  -4  16  16 6624.52 677.093   6
   4  16  16 7535.12 634.178   2
  -4  16  17 6261.17 636.049   6
  -4  16  17 7532.56 619.753   2
   4  16  17 6446.24 582.630   2
   4  16  18 3940.26 437.034   2
  -4  16  18 4574.60 456.507   2
  -4  16  19 485.244 180.658   2
   4  16  19 247.607 137.807   2
   4 -18   0 604.065 154.835   1
   4 -18   1 449.473 141.958   1
   4 -18  -1 400.804 125.493   1
   4 -18  -2 7741.66 468.069   1
   4 -18   2 6364.80 473.499   1
   4 -18   3 23970.2 934.255   1
   4 -18  -3 21967.3 740.472   1
  -4 -18  -4 55072.9 1358.80   1
   4 -18  -4 52441.2 1139.40   1
  -4  18   5 50696.7 1379.33   6
   4 -18  -5 53071.6 1164.86   1
  -4 -18  -5 55038.9 1378.49   1
  -4  18   6 30489.0 1082.40   6
   4 -18  -6 27733.4 874.903   1
  -4 -18  -6 29312.6 1087.79   1
   4  18   6 28089.6 1009.89   4
  -4  18   7 27297.7 1071.97   6
  -4 -18  -7 26358.0 1049.74   1
   4  18   7 25642.1 1018.31   6
   4 -18  -7 27406.3 888.961   1
   4 -18  -8 5366.21 428.219   1
   4  18   8 5884.47 509.434   6
  -4  18   8 5906.88 537.067   6
   4  18   8 4915.71 410.649   2
   4 -18  -9 26.9480 82.1698   1
   4  18   9 72.6257 87.5442   2
  -4  18   9 75.1333 113.395   6
  -4  18  10 283.773 186.270   6
   4  18  10 137.510 134.186   6
   4  18  10 134.271 105.713   2
   4 -18 -10-70.0868 98.2564   1
   4  18 -11 318.745 130.707   1
   4  18  11 614.558 210.367   2
   4  18  11 326.090 147.440   6
   4 -18 -11 623.484 194.188   1
  -4  18  11 254.195 155.926   6
  -4  18  12 774.971 242.417   6
   4  18 -12 352.464 130.387   1
   4  18  12 647.674 213.061   6
   4 -18 -12 807.258 255.173   1
   4  18  12 1255.48 282.624   2
  -4  18  13 5580.77 607.548   6
   4  18  13 5286.54 530.314   2
   4  18  13 5467.70 598.750   6
  -4  18  14 2951.70 456.561   6
   4  18  14 3544.74 477.781   6
   4  18  14 3222.36 433.128   2
  -4  18  15 11692.0 902.677   6
   4  18  15 12660.0 905.699   6
   4  18  15 12658.6 837.760   2
   4  18  16 8766.79 703.411   2
  -4  18  16 8106.27 729.641   6
  -4  18  17 5658.14 589.312   6
   4  18  17 5940.05 558.267   2
  -4  18  17 6677.75 574.582   2
  -4  18  18 3164.49 372.966   2
   4  18  18 2984.96 380.599   2
   4  18  19 697.630 182.482   2
  -4  18  19 755.212 179.155   2
   4 -20   0 76406.5 1602.26   1
   4 -20   1 275.712 138.157   1
   4 -20  -1 431.830 157.142   1
   4 -20   2 37116.3 1266.43   1
   4 -20  -2 36425.6 1077.08   1
   4  20   3 5960.46 439.624   4
   4 -20  -3 7661.48 490.582   1
  -4  20   4 31730.3 1136.52   6
   4 -20  -4 33003.0 984.956   1
   4  20   4 33927.5 1038.14   4
   4 -20  -5 15651.6 683.711   1
  -4 -20  -5 16769.4 825.378   1
  -4  20   5 13926.8 770.448   6
   4  20   5 15546.4 743.813   4
   4  20   6 18647.3 847.005   4
   4 -20  -6 17395.7 740.754   1
   4  20   6 15949.4 782.888   6
  -4 -20  -6 18868.9 906.479   1
  -4  20   6 16328.4 842.196   6
  -4 -20  -7 12653.0 780.858   1
   4  20   7 11946.2 714.193   6
   4 -20  -7 11648.4 624.368   1
  -4  20   7 10843.6 704.241   6
  -4  20   8 755.650 205.469   6
   4  20   8 637.884 168.030   2
   4 -20  -8 445.076 129.713   1
   4  20   8 388.487 135.869   6
   4 -20  -9 277.422 139.810   1
   4  20   9 96.2828 116.572   6
   4  20   9 174.158 114.726   2
  -4  20   9 43.7121 129.307   6
   4 -20 -10 104.397 100.640   1
   4  20  10 109.458 149.289   2
  -4  20  10 581.622 254.041   6
   4  20  10 297.171 188.607   6
   4  20  11-19.4375 133.854   6
   4 -20 -11-140.772 114.474   1
   4  20  11-48.2261 101.907   2
  -4  20  11 163.485 170.496   6
   4  20  12-120.644 162.133   2
   4  20 -12-275.514 119.414   1
  -4  20  12-62.6552 162.971   6
   4 -20 -12 39.3408 129.558   1
   4  20  12-51.7597 133.270   6
  -4  20  13 5509.38 614.869   6
   4  20  13 5941.54 565.896   2
   4  20  13 5132.11 597.286   6
   4  20  14 635.474 209.279   2
  -4  20  14 721.387 233.623   6
   4  20  15 11089.5 830.446   6
  -4  20  15 10125.1 812.138   6
   4  20  15 11402.1 805.114   2
   4  20  16 7110.30 630.219   2
  -4  20  16 6160.29 619.487   6
   4  20  17 2264.96 352.311   2
  -4  20  17 1984.65 357.926   6
  -4  20  17 2332.97 339.822   2
  -4  20  18 1104.42 227.516   2
   4  20  18 1046.04 215.400   2
  -4  20  19 5.18409 81.2226   2
   4 -22   0 79531.4 1783.61   1
   4 -22   1 2354.71 347.516   1
   4  22   1 2416.14 289.273   4
   4 -22  -1 2602.68 327.326   1
   4 -22  -2 5845.71 479.304   1
   4  22   2 5207.18 406.981   4
   4 -22   2 5617.70 512.666   1
  -4  22   3 2322.99 353.935   6
   4 -22  -3 2613.51 322.520   1
   4  22   3 2564.55 308.462   4
  -4  22   4 12727.1 770.257   6
   4 -22  -4 13721.1 707.803   1
   4  22   4 14690.8 710.251   4
  -4  22   5 4664.97 480.498   6
   4 -22  -5 5049.44 430.919   1
   4  22   5 4048.69 385.159   6
   4  22   5 5080.98 432.298   4
  -4  22   6 2907.98 364.410   6
   4 -22  -6 3135.78 352.121   1
   4  22   6 2885.00 380.610   4
   4  22   6 2880.53 343.887   6
   4 -22  -7 438.236 167.296   1
   4  22   7 444.862 156.240   6
  -4  22   7 77.2419 130.648   6
  -4  22   8 1021.80 263.761   6
   4  22   8 1109.06 234.008   6
   4 -22  -8 853.142 193.678   1
  -4  22   9 1650.20 319.314   6
   4 -22  -9 1505.04 271.142   1
   4  22   9 1908.37 350.883   6
   4  22   9 1482.64 348.551   2
   4  22  10 385.515 199.657   6
  -4  22  10 77.2631 147.590   6
   4 -22 -10 286.532 204.106   1
   4  22  10 270.755 180.458   2
  -4  22  11 14619.0 962.764   6
   4  22  11 15238.2 948.394   6
   4 -22 -11 12679.3 888.999   1
   4  22  11 15541.6 880.343   2
   4  22  12 201.283 220.808   6
  -4  22  12-55.5499 173.378   6
   4  22  12 26.9437 187.298   2
   4  22  13 4074.31 488.125   2
   4  22  13 4563.94 545.620   6
  -4  22  13 3260.81 461.703   6
  -4  22  14 778.208 313.944   6
   4  22  14 719.743 215.931   2
   4  22  14 862.296 255.710   6
   4  22  15 1401.40 309.899   6
   4  22  15 1543.07 315.096   2
  -4  22  15 992.337 268.940   6
   4  22  16 759.419 244.450   2
  -4  22  16 543.405 244.982   6
  -4  22  17 965.927 218.621   2
   4  22  17 488.273 174.015   2
  -4  22  17 499.868 195.796   6
   4  22  18 45.0604 129.284   2
  -4  22  18 167.635 128.607   2
   4 -24   0 85612.2 2037.70   1
   4  24   0 71114.2 1523.39   4
   4 -24  -1 3270.03 395.941   1
   4  24   1 2711.13 318.281   4
   4 -24   1 2812.47 419.164   1
   4 -24  -2 24206.4 1022.74   1
   4 -24   2 25963.5 1184.36   1
   4  24   2 23600.7 910.701   4
   4  24   3 35.4170 72.4130   4
   4 -24  -3 79.6437 94.6681   1
   4  24   3 131.596 116.752   6
   4 -24  -4 727.600 193.830   1
   4  24   4 717.177 189.155   6
   4  24   4 670.858 160.174   4
  -4  24   4 531.184 179.274   6
  -4  24   5 1219.84 283.565   6
   4  24   5 1001.69 218.822   6
   4 -24  -5 1186.65 235.879   1
  -4  24   6 369.922 250.651   6
   4  24   6 239.967 145.494   6
   4  24   6 287.489 158.116   4
   4 -24  -6 313.719 155.103   1
  -4  24   7 5282.36 510.584   6
   4 -24  -7 5910.19 526.656   1
   4  24   7 6226.09 547.888   6
  -4  24   8 683.840 237.899   6
   4 -24  -8 754.082 208.407   1
   4  24   8 951.914 249.272   6
   4  24   9 32741.2 1312.19   6
   4 -24  -9 32452.8 1339.24   1
  -4  24   9 30518.8 1328.30   6
  -4  24  10 1439.70 318.372   6
   4 -24 -10 1748.92 360.105   1
   4  24  10 1300.89 308.718   6
   4  24  11 5262.05 577.122   6
   4 -24 -11 4019.72 573.791   1
  -4  24  11 5024.85 575.217   6
   4  24  11 5042.66 500.019   2
  -4  24  12 2423.06 424.142   6
   4  24  12 2867.19 408.167   2
   4  24  12 2580.24 405.190   6
  -4  24  13 1702.58 371.916   6
   4  24  13 1872.28 336.999   2
   4  24  13 1371.72 289.913   6
   4  24  14 290.834 217.863   2
  -4  24  14 402.097 245.374   6
   4  24  14 645.133 203.488   6
   4  24  15 179.237 134.811   2
  -4  24  15 120.029 148.501   6
   4  24  15 105.562 137.773   6
  -4  24  16-134.396 132.933   2
  -4  24  16 17.8170 134.835   6
   4  24  16 87.9410 132.357   2
  -4  24  17 213.326 164.999   6
   4  24  17 120.263 144.685   2
  -4  24  17 135.187 136.537   2
  -4  24  18 653.623 167.513   2
   4 -26   0 98137.4 2428.21   1
   4  26   0 97147.4 1880.56   4
   4  26   1 4332.00 422.239   6
   4 -26  -1 5938.07 570.688   1
   4 -26   1 6112.39 610.627   1
   4  26   1 5063.79 440.597   4
   4  26  -1 5919.20 472.396   4
   4 -26  -2 30388.6 1226.18   1
   4  26   2 28572.0 1044.26   4
   4 -26  -3 5601.14 531.407   1
  -4  26   3 5240.13 523.795   6
   4  26   3 4144.11 407.722   6
   4  26   3 5129.84 451.653   4
   4 -26  -4 1919.09 305.486   1
  -4  26   4 1771.49 322.405   6
   4  26   4 1816.09 292.481   4
   4  26   4 1642.42 266.923   6
   4 -26  -5 654.676 207.560   1
  -4  26   5 697.643 235.095   6
   4  26   5 980.340 247.735   4
   4  26   5 577.867 172.077   6
   4  26   6 195.262 105.309   6
   4 -26  -6-81.8772 106.111   1
  -4  26   6 272.221 177.294   6
  -4  26   7 1321.00 286.778   6
   4 -26  -7 1432.78 315.085   1
   4  26   7 1170.61 239.228   6
   4  26   8 5836.14 549.426   6
   4 -26  -8 6084.37 616.127   1
  -4  26   8 5967.05 581.487   6
   4 -26  -9 26692.0 1317.79   1
   4  26   9 30486.6 1273.62   6
  -4  26   9 28909.3 1333.16   6
  -4  26  10 1635.26 345.012   6
   4  26  10 1448.40 324.466   6
   4 -26 -10 1139.03 294.332   1
  -4  26  11 28488.2 1363.05   6
   4  26  11 29143.7 1297.53   6
  -4  26  12 454.765 243.125   6
   4  26  12 541.506 235.623   6
   4  26  13 11382.4 807.184   6
  -4  26  13 10395.3 821.163   6
   4  26  14 761.084 236.191   6
  -4  26  14 894.397 289.473   6
   4  26  14 886.539 259.453   2
  -4  26  15 975.394 281.520   6
   4  26  15 1045.37 220.109   2
   4  26  15 1058.79 259.131   6
  -4  26  16 20.4719 124.161   2
  -4  26  16 165.978 148.260   6
  -4  26  17 32.0116 121.173   6
  -4  26  17 106.389 82.4296   2
   4  28   0 32395.6 1188.01   6
   4  28   0 36746.3 1211.78   4
   4 -28   0 35574.6 1537.18   1
   4  28   1 2660.09 360.451   4
   4  28   1 4177.18 470.821   6
   4  28  -1 3098.77 366.501   4
   4 -28  -1 2809.75 443.505   1
   4 -28   1 3183.72 490.167   1
   4 -28  -2 16335.5 972.937   1
   4  28   2 17036.9 824.868   4
   4  28   2 13767.4 764.785   6
   4  28  -2 16730.9 810.599   4
  -4  28   3 992.300 260.152   6
   4  28   3 987.679 245.927   6
   4 -28  -3 1162.04 285.213   1
   4  28   3 848.794 186.339   4
   4  28  -3 1119.21 230.922   4
   4  28   4 502.074 172.936   6
   4  28   4 692.129 216.947   4
  -4  28   4 666.239 262.043   6
   4 -28  -4 719.771 223.484   1
   4  28   5 7.27172 99.9924   6
   4 -28  -5-107.656 110.905   1
   4  28   5-24.4628 98.4296   4
  -4  28   5-85.4890 168.839   6
  -4  28   6 153.881 127.070   6
   4  28   6 464.889 182.491   6
   4 -28  -6 23.9756 146.414   1
   4  28   7 1769.86 327.025   6
   4 -28  -7 1553.69 326.113   1
  -4  28   7 2069.51 367.970   6
  -4  28   8 295.001 174.369   6
   4  28   8 576.792 231.735   6
   4 -28  -8 502.097 204.768   1
   4 -28  -9 9553.76 819.596   1
   4  28   9 11571.7 792.012   6
  -4  28   9 11231.1 852.424   6
  -4  28  10 2485.52 466.376   6
   4  28  10 2567.78 395.916   6
   4  28  11 19452.9 1046.92   6
  -4  28  11 17432.5 1077.71   6
   4  28  12 981.376 243.285   6
  -4  28  12 1689.25 363.897   6
  -4  28  13 1637.91 350.254   6
   4  28  13 1682.01 322.271   6
   4  28  14 322.591 196.033   6
  -4  28  14 68.7787 133.869   6
   4  28  15 46.3547 117.569   6
  -4  28  15 129.290 111.879   2
  -4  28  15 40.8533 121.834   6
  -4  28  16 242.180 119.783   2
  -4  28  16 140.492 157.204   6
  -4  28  17 74.1306 92.1361   6
   4 -30   0 10514.5 882.282   1
   4  30   0 10180.4 693.131   6
   4  30   0 9792.38 659.927   4
   4  30  -1 797.807 205.906   4
   4  30   1 733.082 218.058   4
   4 -30  -1 987.883 282.240   1
   4  30   1 810.545 239.156   6
   4 -30  -2 3871.36 540.585   1
   4  30   2 3568.09 402.858   4
   4  30   2 3404.57 396.215   6
  -4  30   2 2912.83 484.921   6
   4  30  -2 3661.80 410.406   4
   4  30   3 359.199 178.518   4
   4  30   3 258.136 135.821   6
   4 -30  -3 301.745 121.352   1
  -4  30   3 34.7723 183.506   6
   4  30  -3 303.742 139.758   4
   4 -30  -4 853.131 237.699   1
  -4  30   4 757.138 278.559   6
   4  30   4 725.360 192.449   6
   4  30   4 915.613 232.635   4
   4  30  -4 836.678 179.721   4
  -4  30   5 633.629 271.044   6
   4  30  -5 488.774 158.576   4
   4 -30  -5-28.4198 135.774   1
   4  30   5 580.057 193.960   6
   4 -30  -6 182.199 116.834   1
   4  30   6 103.225 149.128   6
   4  30  -6 403.373 144.852   4
  -4  30   6 442.028 225.860   6
   4  30   7 3025.90 408.040   6
   4 -30  -7 2408.44 418.880   1
  -4  30   7 3442.74 525.968   6
  -4  30   8 1514.47 432.017   6
   4  30   8 931.069 244.314   6
   4 -30  -8 720.679 291.780   1
  -4  30   9 3331.80 478.968   6
   4  30   9 2681.36 390.082   6
   4  30  10 283.591 135.566   6
  -4  30  10 263.857 224.650   6
  -4  30  11 13715.2 958.019   6
   4  30  11 13784.0 868.422   6
  -4  30  12 1268.58 336.086   6
   4  30  12 877.286 221.192   6
   4  30  13 23.3695 131.191   6
  -4  30  13 186.964 166.820   6
  -4  30  14 299.159 165.853   6
   4  30  14 711.539 230.551   6
  -4  30  15 1006.64 250.746   6
  -4  30  15 1075.87 199.122   2
   4  30  15 934.328 233.412   6
  -4  30  16 185.074 104.204   6
   4  32   0 18.6167 118.242   4
   4  32   0-7.90969 149.432   6
   4 -32  -1-162.993 199.206   1
   4  32  -1-17.9318 153.108   6
   4  32  -1 108.407 116.790   4
   4  32   1 122.796 120.609   4
   4  32   1-40.2648 154.398   6
   4  32   2 5737.26 523.842   6
   4  32   2 6458.49 557.612   4
   4  32  -2 5848.51 523.580   4
  -4  32   2 6057.39 620.380   6
   4 -32  -2 5597.38 669.302   1
   4  32  -3 44.9887 104.721   4
   4  32   3 50.9358 111.866   4
   4 -32  -3 245.620 185.028   1
  -4  32   3 37.0592 170.316   6
   4  32   3 157.566 148.517   6
   4  32  -4 914.057 209.311   4
   4  32   4 1041.41 239.505   6
   4 -32  -4 1198.06 336.432   1
   4  32   4 1174.81 275.406   4
  -4  32   4 748.682 299.040   6
   4  32   5 2881.57 386.671   6
  -4  32   5 2202.77 426.391   6
   4 -32  -5 2994.24 485.240   1
   4  32  -5 3530.33 401.044   4
   4  32   6 11966.3 773.537   6
   4  32  -6 10965.2 686.927   4
   4 -32  -6 10744.0 891.541   1
  -4  32   6 11051.6 846.058   6
  -4  32   7 18051.0 1049.53   6
   4  32   7 17840.3 974.787   6
  -4  32   8 736.648 236.042   6
   4  32   8 850.147 244.147   6
  -4  32   9 400.133 197.532   6
   4  32   9 620.562 214.254   6
   4  32  10 299.426 179.093   6
  -4  32  10 376.187 253.799   6
  -4  32  11 1552.44 357.588   6
   4  32  11 1599.50 288.486   6
  -4  32  12 134.323 159.500   6
   4  32  12 105.300 163.494   6
  -4  32  13 591.333 221.895   6
   4  32  13 485.005 190.913   6
   4  32  14 764.914 197.441   6
  -4  32  14 1028.82 254.555   6
   4  32  15 5025.57 436.379   6
  -4  32  15 6901.60 558.156   6
   4  34   0 2744.46 398.372   6
   4  34   0 3041.62 396.263   4
   4  34   1 2567.57 395.802   6
  -4  34   1 2824.83 458.655   6
   4  34   1 2703.64 381.855   4
   4  34  -1 2994.48 409.089   4
  -4  34   2 2725.65 407.384   6
   4  34   2 2706.33 371.026   6
   4 -34  -2 3055.16 532.993   1
   4  34   2 3109.43 407.629   4
   4  34  -2 3228.13 399.380   4
  -4  34   3 950.288 297.807   6
   4  34  -3 1314.81 272.894   4
   4 -34  -3 1327.06 353.989   1
   4  34   3 1182.29 270.508   6
   4  34   3 1312.06 247.618   4
  -4  34   4 3524.07 502.786   6
   4  34   4 3712.40 436.640   6
   4  34  -4 4052.29 435.232   4
   4 -34  -4 2421.48 448.601   1
  -4  34   5 14178.3 927.410   6
   4  34   5 14147.4 858.872   6
   4  34   6 18404.0 976.961   6
   4  34  -6 17838.9 852.759   4
  -4  34   6 19656.9 1094.97   6
   4  34   7 8800.51 693.746   6
  -4  34   7 8808.15 753.498   6
  -4  34   8 3227.45 478.437   6
   4  34   8 2688.88 394.830   6
  -4  34   9-30.7790 149.174   6
   4  34   9 151.983 161.165   6
   4  34  10 57.2555 110.800   6
  -4  34  10-88.5684 139.249   6
   4  34  11 796.550 237.616   6
  -4  34  11 836.669 259.499   6
   4  34  12 29.3188 100.071   6
  -4  34  12 950.548 333.990   6
   4  34  13 3338.95 395.194   6
  -4  34  13 3919.03 454.141   6
  -4  34  14 1203.14 254.167   6
   4  34  14 933.121 204.515   6
  -4  34  15 6219.59 482.292   6
   4  36   0 12770.5 828.250   4
  -4  36   0 12213.8 869.647   6
  -4  36   1 740.493 226.404   6
   4  36   1 1163.94 257.354   4
   4  36  -1 1055.01 249.229   4
  -4  36   2 262.274 218.449   6
   4  36   2 8.57264 123.625   6
   4  36   2 271.591 177.951   4
   4  36  -2 217.935 163.636   4
   4  36   3 550.399 189.988   6
   4  36  -3 604.581 191.565   4
  -4  36   4 16991.9 1016.96   6
   4  36   4 16275.0 922.652   6
   4  36  -4 16746.1 884.501   4
  -4  36   5 13808.5 897.471   6
   4  36  -5 13779.7 774.753   4
   4  36   5 12561.0 810.970   6
  -4  36   6 7027.42 652.296   6
   4  36   6 7525.11 628.656   6
   4  36   7 9649.78 729.677   6
  -4  36   7 10658.7 810.255   6
  -4  36   8 652.510 258.672   6
   4  36   8 708.201 216.853   6
  -4  36   9 871.919 254.883   6
   4  36   9 444.630 145.774   6
   4  36  10 117.193 146.842   6
  -4  36  10 158.040 156.594   6
  -4  36  11-26.4978 182.949   6
   4  36  11 6.22075 118.599   6
   4  36  12 207.304 115.443   6
  -4  36  12 12.5435 131.622   6
  -4  36  13 1753.90 284.282   6
  -4  36  14 1225.18 222.716   6
  -4  38   0 14092.7 900.341   6
   4  38   0 13712.0 862.363   4
  -4  38   1 450.487 232.180   6
  -4  38  -1 607.489 241.058   6
   4  38   1 490.348 193.031   4
   4  38  -1 759.937 217.705   4
   4  38  -2-20.7700 103.454   4
  -4  38   2 69.3767 153.813   6
  -4  38   3 4071.46 497.042   6
   4  38  -3 4290.28 478.778   4
  -4  38   4 9634.23 751.061   6
   4  38  -4 9589.24 674.331   4
   4  38   4 10058.3 718.687   6
  -4  38   5 917.755 243.773   6
   4  38  -5 1214.42 252.758   4
   4  38   5 716.913 195.615   6
  -4  38   6 1431.65 296.073   6
   4  38   6 1589.38 299.027   6
   4  38   7 808.841 237.144   6
  -4  38   7 849.312 255.535   6
  -4  38   8 114.722 136.282   6
   4  38   8 316.563 290.582   6
  -4  38   9 604.323 226.160   6
   4  38   9 692.720 210.824   6
   4  38  10 271.152 141.233   6
  -4  38  10 558.900 183.472   6
  -4  38  11 136.961 136.268   6
  -4  38  12-93.7310 100.194   6
  -4  38  13 498.667 162.904   6
  -4  40   0 31153.1 1307.95   6
  -4  40  -1 3376.76 450.389   6
  -4  40   1 3336.15 447.795   6
  -4  40  -2 323.697 173.394   6
  -4  40   2 237.885 147.050   6
   4  40  -2 105.004 93.3944   4
  -4  40   3 277.501 179.254   6
   4  40  -3 294.380 144.858   4
  -4  40   4 752.767 237.421   6
   4  40  -4 682.743 181.372   4
  -4  40   5 591.799 179.542   6
  -4  40   6 115.049 165.809   6
  -4  40   7 264.266 186.450   6
  -4  40   8 1461.27 290.939   6
  -4  40   9 4021.65 454.182   6
  -4  40  10 1046.04 248.811   6
  -4  40  11 3417.11 377.192   6
  -4  40  12 228.854 125.268   6
  -4  42   0 26706.8 1160.00   6
  -4  42   1 2900.61 392.380   6
  -4  42  -1 3205.70 419.906   6
  -4  42  -2 10187.3 720.282   6
  -4  42   2 9979.97 719.894   6
  -4  42   3 843.192 228.657   6
  -4  42  -3 773.459 215.025   6
  -4  42   4-55.8340 135.825   6
  -4  42   5 15.0718 130.770   6
  -4  42   6 262.825 159.692   6
  -4  42   7 3498.97 407.395   6
  -4  42   8 2421.56 333.556   6
  -4  42   9 8685.77 595.176   6
  -4  42  10 1221.35 217.294   6
  -4  44   0 15131.8 838.241   6
  -4  44  -1 2330.07 350.871   6
  -4  44   1 2490.86 358.272   6
  -4  44   2 6724.59 550.806   6
  -4  44  -2 6623.52 556.881   6
  -4  44  -3 469.756 186.832   6
  -4  44   3 669.652 200.465   6
  -4  44   4 163.121 131.628   6
  -4  44  -4 132.301 139.282   6
  -4  44   5 330.544 146.038   6
  -4  44  -5-145.049 150.332   6
  -4  44   6 239.757 142.470   6
  -4  44  -6 296.746 120.067   6
  -4  44   7 2040.89 298.700   6
  -4  44   8 2645.01 323.827   6
  -4  44   9 9961.14 579.278   6
  -4  46   0 8470.32 576.954   6
  -4  46   1 906.732 205.318   6
  -4  46  -1 951.484 215.099   6
  -4  46   2 2267.49 311.405   6
  -4  46  -2 2440.97 305.998   6
  -4  46   3 114.167 109.290   6
  -4  46  -3 68.5577 105.633   6
  -4  46  -4-115.182 104.330   6
  -4  46   4-40.9817 94.2940   6
  -4  46  -5 67.9474 84.9841   6
  -4  46   5 10.1031 86.3135   6
  -4  46  -6 35.2267 108.934   6
  -4  46   6-109.959 94.7234   6
  -4  46   7 99.3384 77.6198   6
  -4  48   0 312.609 119.772   6
  -4  48  -1 249.743 127.867   6
  -4  48   1 248.866 115.374   6
  -4  48  -2-118.401 106.766   6
  -4  48   2-90.0615 103.055   6
  -4  48   3 241.059 100.406   6
  -4  48  -3 430.560 143.008   6
  -4  48   4 1857.25 242.592   6
   5  -1   0 229.147 47.3816   1
   5   1   0 189.019 48.6572   1
   5   1   1 107817. 668.779   1
   5  -1   1 109940. 678.638   1
   5   1  -1 110110. 879.239   1
   5  -1  -1 106321. 867.948   1
   5   1   2 8176.98 144.605   1
   5  -1   2 8371.19 156.692   1
   5   1  -2 9307.83 282.126   1
   5  -1  -2 8257.70 264.593   1
   5   1  -3 254496. 1560.68   1
   5  -1  -3 254748. 1562.64   1
   5   1  -4 50731.6 754.921   1
   5  -1  -4 51577.9 762.231   1
   5   1  -5 23886.9 561.556   1
   5  -1  -5 24120.3 553.914   1
   5   1  -6 11414.9 418.058   1
   5  -1  -6 11243.9 413.843   1
   5   1  -7 4994.33 301.791   1
   5  -1  -7 5082.45 301.204   1
   5   1  -8 2651.77 237.367   1
   5  -1  -8 2321.10 226.888   1
   5   1  -9 97.7596 75.4550   1
   5  -1  -9 124.670 75.5531   1
   5  -1   9 256.583 144.111   2
   5   1   9 231.973 135.514   2
   5   1 -10 712.083 164.217   1
   5  -1 -10 685.908 158.126   1
  -5   1  10 755.791 212.939   6
   5  -1  10 836.827 201.640   2
   5   1  10 603.557 200.309   2
  -5  -1  10 508.400 147.495   6
   5  -1  11 145.045 125.414   2
  -5   1  11 54.7744 119.623   6
   5  -1 -11 165.424 87.7835   1
   5   1 -11 182.445 113.143   1
   5   1  11 219.828 145.082   2
  -5  -1  11 183.091 125.765   6
   5  -1  12 2133.56 407.334   2
  -5   1  12 1302.88 290.889   6
   5   1 -12 1667.61 255.820   1
   5  -1 -12 1418.19 241.785   1
   5   1  12 1862.17 323.494   2
   5  -1 -13 480.548 160.251   1
   5  -1  13 764.827 270.999   2
   5   1  13 268.935 183.633   2
   5   1 -13 476.950 167.848   1
   5  -1  14 18980.5 1058.72   2
   5  -1 -14 13366.4 792.586   1
   5   1  14 18396.4 1041.67   2
   5   1 -14 13779.0 806.020   1
   5   1  15 9891.31 790.617   2
   5  -1  15 10432.6 825.846   2
   5  -1  16 15735.4 979.894   2
   5   1  16 15445.6 995.354   2
  -5  -1  16 15593.6 922.628   2
   5   1  17 5261.66 569.798   2
   5  -1  17 5017.14 563.568   2
  -5   1  17 5337.67 545.185   2
  -5  -1  17 5668.83 559.827   2
   5  -1  18 965.969 274.400   2
   5   1  18 1129.90 277.387   2
  -5  -1  18 998.831 231.073   2
  -5   1  18 1274.22 296.512   2
   5  -1  19 279.102 167.416   2
   5   1  19 219.216 130.675   2
  -5  -1  19 734.757 299.722   2
  -5   1  19 671.244 209.734   2
   5   1  20-53.7915 140.266   2
  -5   1  20 8.58945 93.9781   2
   5  -1  20-131.597 155.067   2
   5  -3   0 2800.37 135.818   1
   5  -3  -1 497.979 68.6424   1
   5  -3   1 241.922 46.0456   1
   5  -3   2 6440.98 178.352   1
   5  -3  -2 7555.10 256.504   1
   5  -3  -3 3861.47 196.365   1
   5  -3   3 2802.50 119.898   1
   5  -3  -4 20536.8 483.586   1
   5   3  -4 19778.5 485.588   1
   5  -3  -5 59304.1 873.298   1
   5   3  -5 57754.6 888.074   1
   5  -3  -6 26448.0 625.969   1
   5   3  -6 26071.2 639.706   1
   5  -3  -7 2070.70 186.336   1
   5   3  -7 2328.61 212.347   1
   5  -3  -8 532.600 126.031   1
   5   3  -8 741.888 138.211   1
   5  -3  -9 3402.00 276.737   1
   5   3   9 3288.42 379.681   6
   5  -3   9 3572.35 387.686   2
   5   3   9 3526.80 370.583   2
   5   3  -9 3539.51 314.066   1
   5   3 -10 12463.5 629.940   1
  -5   3  10 12544.6 698.699   6
   5  -3 -10 13524.2 611.630   1
   5  -3  10 14118.0 771.324   2
   5   3  10 13845.4 738.010   2
   5   3  10 13861.5 810.713   6
  -5   3  11 412.581 185.283   6
   5   3  11 316.940 164.396   2
   5   3 -11 403.422 123.338   1
   5  -3 -11 449.204 146.688   1
   5  -3  11 357.119 159.534   2
   5   3 -12 938.652 194.547   1
   5  -3  12 952.715 237.235   2
   5   3  12 1069.97 253.064   2
   5  -3 -12 1080.27 199.371   1
  -5   3  12 1205.53 295.497   6
   5  -3 -13 119.651 120.168   1
   5   3 -13-1.10190 116.390   1
   5  -3  13 113.448 141.735   2
   5   3  13 87.0996 137.681   2
  -5   3  13-100.223 154.085   6
   5   3 -14 4496.04 469.158   1
   5  -3  14 5982.73 620.310   2
   5   3  14 5212.27 545.561   2
   5  -3  15 1701.54 340.210   2
   5   3  15 1334.34 298.140   2
  -5  -3  16 14628.2 881.698   2
   5  -3  16 14830.4 956.814   2
   5   3  16 14384.1 938.178   2
   5   3  17 8434.54 728.685   2
   5  -3  17 8121.16 709.055   2
  -5  -3  17 8503.34 663.691   2
  -5   3  17 8835.56 704.284   2
  -5   3  18-3.35698 124.135   2
   5  -3  18-93.1678 171.330   2
   5   3  18 186.499 199.061   2
  -5  -3  18 252.756 152.425   2
   5  -3  19 1219.99 271.647   2
   5   3  19 1442.02 278.927   2
  -5   3  19 1431.73 275.190   2
   5   3  20 51.5439 155.311   2
  -5   3  20 110.736 132.955   2
   5  -3  20 48.4527 125.587   2
   5  -5   0 479.831 68.2204   1
   5  -5  -1 17850.1 379.046   1
   5  -5   1 18791.2 355.309   1
   5  -5   2 1764.22 114.622   1
   5  -5  -2 1695.94 138.483   1
   5  -5  -3 13544.9 369.308   1
   5  -5   3 12200.2 329.881   1
   5  -5  -4 5196.79 240.721   1
   5  -5  -5 4138.97 238.264   1
   5  -5  -6 6797.55 314.003   1
   5   5  -6 6350.36 327.835   1
   5  -5  -7 930.914 139.126   1
   5   5  -7 830.244 126.385   1
   5  -5  -8 33713.1 820.873   1
   5   5  -8 34329.8 873.010   1
  -5   5   9 1005.86 201.664   6
   5   5  -9 1417.42 205.641   1
   5  -5  -9 1285.67 188.921   1
   5  -5   9 1249.59 250.159   2
   5   5   9 1162.28 228.239   2
   5   5   9 1217.36 234.710   6
   5  -5 -10 40206.9 1054.65   1
   5  -5  10 42662.2 1333.98   2
   5   5 -10 41258.8 1116.71   1
  -5   5  10 38488.8 1276.30   6
   5   5  10 43245.1 1430.91   6
   5   5  10 39742.5 1211.23   2
  -5   5  11 113.461 144.582   6
   5   5  11 235.391 155.596   6
   5   5 -11 281.185 100.069   1
   5  -5  11 219.959 163.295   2
   5   5  11 174.546 150.483   2
   5  -5 -11 275.733 138.194   1
   5   5 -12 1677.28 268.116   1
   5  -5 -12 1503.80 250.412   1
   5  -5  12 1305.42 296.734   2
   5   5  12 1213.95 254.450   2
  -5   5  12 1769.25 324.810   6
   5   5 -13 140.713 119.025   1
   5  -5  13 159.428 155.268   2
   5   5  13 1.28358 121.820   2
  -5   5  13 75.6922 236.086   6
   5  -5 -13 113.862 125.707   1
   5   5 -14 374.465 152.504   1
   5   5  14 566.178 238.543   2
  -5   5  14 451.147 254.873   6
   5  -5  15 4327.13 534.934   2
   5   5  15 4556.57 540.719   2
  -5  -5  15 4665.46 496.473   2
   5  -5  16 8836.35 750.322   2
   5   5  16 9407.06 767.201   2
  -5  -5  16 8619.41 686.677   2
   5  -5  17 1093.95 330.924   2
   5   5  17 412.642 143.801   2
  -5   5  17 1256.57 265.288   2
   5  -5  18 1652.09 330.673   2
   5   5  18 1797.02 340.930   2
  -5   5  18 2026.13 364.459   2
   5   5  19 5776.23 551.213   2
   5  -5  19 5519.07 558.051   2
  -5   5  19 6614.02 548.130   2
   5  -5  20 866.976 247.339   2
   5   5  20 682.628 219.889   2
  -5   5  20 778.439 228.187   2
   5  -7   0 348.114 73.3633   1
   5  -7   1 48180.9 661.449   1
   5  -7  -1 47142.5 664.856   1
   5  -7   2 2011.37 152.401   1
   5  -7  -2 2257.22 152.720   1
   5  -7  -3 4264.76 218.367   1
   5  -7   3 4978.06 246.593   1
   5  -7  -4 7560.39 304.323   1
   5  -7  -5 7270.24 312.659   1
   5  -7  -6 3447.30 232.980   1
   5   7  -7 1056.35 159.101   1
   5  -7  -7 987.836 146.318   1
   5   7  -8 7626.60 427.831   1
   5  -7  -8 7520.42 394.094   1
   5   7   9 12191.0 718.813   6
   5  -7   9 12013.6 686.809   2
   5  -7  -9 12086.4 534.862   1
   5   7  -9 12189.4 582.127   1
   5   7   9 11291.8 639.849   2
  -5   7   9 12232.5 697.683   6
   5   7  10 99609.8 2166.44   6
   5  -7  10 102071. 2088.17   2
   5  -7 -10 93908.9 1617.95   1
   5   7  10 92288.0 1852.07   2
  -5   7  10 93214.3 2046.49   6
   5   7 -10 99130.5 1743.75   1
   5   7  11 519.494 211.266   6
   5   7 -11 323.714 152.435   1
   5  -7  11 300.598 170.579   2
   5   7  11 259.427 173.525   2
  -5   7  11 143.368 142.583   6
   5  -7 -11 347.964 139.237   1
   5   7 -12 43882.4 1336.49   1
   5  -7  12 45876.6 1552.27   2
   5   7  12 47134.4 1636.07   6
   5   7  12 45044.9 1435.94   2
   5  -7 -12 44303.2 1296.12   1
  -5   7  12 46035.4 1569.09   6
   5   7 -13 728.073 212.892   1
   5  -7  13 1061.60 290.518   2
   5   7  13 559.511 220.086   2
   5  -7 -13 1036.73 241.651   1
  -5   7  13 1079.36 259.465   6
   5  -7  14-177.956 176.580   2
  -5   7  14 297.079 252.864   6
   5   7  14-28.7918 136.337   2
   5  -7  15 4179.79 555.551   2
   5   7  15 3871.71 492.878   2
  -5   7  15 3792.91 505.656   6
   5   7  16 3236.83 476.336   2
   5  -7  16 3109.02 474.038   2
   5  -7  17 1065.15 299.698   2
   5   7  17 922.006 290.614   2
   5  -7  18 788.884 270.333   2
   5   7  18 1258.32 308.248   2
  -5   7  18 1501.14 301.893   2
   5   7  19 14734.5 858.830   2
   5  -7  19 13393.2 841.260   2
  -5   7  19 15069.3 839.694   2
  -5   7  20 1155.03 218.707   2
   5   7  20 1859.46 297.317   2
   5  -9   0 315.732 94.9773   1
   5  -9   1 105766. 1122.77   1
   5  -9  -1 106499. 1092.20   1
   5  -9   2 6158.26 316.188   1
   5  -9  -2 6347.68 281.645   1
   5  -9  -3 24572.0 545.684   1
   5  -9   3 28112.7 651.696   1
   5  -9  -4 1966.19 164.181   1
   5  -9  -5-87.7819 72.2111   1
   5  -9  -6 1833.77 177.338   1
   5  -9  -7 5509.83 321.158   1
   5  -9  -8 3490.47 286.315   1
   5   9  -8 4446.25 332.242   1
   5   9   9 6448.47 528.186   6
   5  -9   9 6008.75 502.212   2
  -5   9   9 6057.52 505.388   6
   5  -9  -9 6847.19 427.184   1
   5   9  -9 5757.25 418.833   1
   5   9   9 6015.15 450.828   2
   5  -9  10 91828.2 1983.33   2
   5  -9 -10 92715.3 1627.77   1
   5   9  10 90617.1 1839.51   2
   5   9 -10 92257.4 1726.97   1
  -5   9  10 95156.2 2104.09   6
   5   9  10 98630.2 2132.77   6
   5  -9 -11 1252.99 229.354   1
   5  -9  11 1167.63 313.763   2
   5   9 -11 1050.81 216.722   1
   5   9  11 1151.81 267.804   2
   5   9  11 1260.38 293.168   6
  -5   9  11 1053.46 253.390   6
   5   9  12 41834.0 1391.70   2
   5  -9  12 42433.2 1490.20   2
   5   9 -12 41072.4 1309.99   1
  -5   9  12 43975.8 1563.47   6
   5   9  12 43539.9 1587.61   6
   5  -9 -12 41326.8 1280.22   1
   5   9 -13 367.002 188.270   1
   5  -9  13 96.4314 216.613   2
   5   9  13-297.597 170.659   2
   5   9  13 36.0734 168.852   6
   5  -9 -13 400.384 186.129   1
  -5   9  13 459.508 243.878   6
   5   9  14 7437.83 641.462   2
   5  -9  14 6521.08 660.632   2
  -5   9  14 7124.41 690.923   6
   5  -9  15 93.8132 167.064   2
  -5   9  15 446.415 250.871   6
   5   9  15 157.151 207.493   2
   5  -9  16 110.823 147.040   2
   5   9  16 267.349 189.159   2
   5  -9  17 68.8117 166.611   2
   5   9  17 287.979 226.549   2
   5   9  18 3846.55 468.527   2
   5  -9  18 3227.45 456.242   2
  -5   9  18 4017.27 454.343   2
   5   9  19 8321.31 624.567   2
  -5   9  19 9268.99 651.645   2
  -5   9  20 662.100 178.088   2
   5   9  20 1310.75 296.078   2
   5 -11   0 1034.45 149.533   1
   5 -11   1 69611.7 1026.97   1
   5 -11  -1 68824.6 982.381   1
   5 -11  -2 3373.08 221.344   1
   5 -11   2 3925.39 267.556   1
   5 -11   3 4089.80 302.232   1
   5 -11  -3 4692.57 258.778   1
   5 -11  -4 305.133 82.9679   1
   5 -11  -5 2632.14 205.909   1
   5 -11  -6 48908.7 920.090   1
   5 -11  -7 491.385 104.311   1
   5 -11  -8 10400.0 489.624   1
   5  11   8 9646.22 553.623   2
  -5  11   8 10793.8 651.788   6
   5  11  -9 3617.47 391.316   3
   5 -11   9 3957.41 410.639   2
   5  11   9 4488.24 455.991   6
   5  11   9 4536.52 407.884   2
   5 -11  -9 4521.69 344.741   1
  -5  11   9 5055.64 471.172   6
   5  11  -9 4505.48 360.862   1
   5  11 -10 82939.7 1667.19   1
   5  11  10 85373.6 1801.52   2
   5 -11 -10 85966.1 1614.85   1
   5 -11  10 81844.2 1888.68   2
   5  11  10 90747.1 2071.45   6
  -5  11  10 90770.8 2092.74   6
   5 -11 -11 749.326 195.634   1
   5 -11  11 742.207 210.453   2
   5  11 -11 659.883 168.710   1
   5  11  11 243.324 138.296   2
  -5  11  11 631.909 207.403   6
   5  11  11 686.829 241.722   6
   5  11 -12 16679.2 836.756   1
   5 -11 -12 16554.1 841.168   1
   5  11  12 16287.5 877.923   2
   5  11  12 17515.6 1007.10   6
  -5  11  12 17325.9 1014.13   6
   5 -11  12 16134.4 946.785   2
   5 -11  13 549.130 253.854   2
   5 -11 -13 349.764 189.690   1
   5  11 -13 334.696 161.944   1
   5  11  13 691.812 275.519   6
  -5  11  13 548.592 224.671   6
   5  11  13 126.800 155.312   2
   5 -11  14 295.145 248.452   2
   5  11  14 142.781 193.309   2
  -5  11  14 481.910 374.052   6
  -5  11  15 821.958 249.336   6
   5  11  15 677.135 261.224   2
   5 -11  15 618.390 267.007   2
   5 -11  16 846.748 284.236   2
   5  11  16 1198.39 308.741   2
  -5  11  16 959.067 269.034   6
   5 -11  17-56.7575 192.072   2
   5  11  17 363.659 165.638   2
  -5  11  18 851.195 231.882   2
   5  11  18 642.572 230.162   2
   5 -11  18 123.826 133.558   2
   5  11  19 6635.75 553.399   2
  -5  11  19 7698.62 582.457   2
   5  11  20 512.543 173.114   2
  -5  11  20 346.499 112.855   2
   5 -13   0 404.987 104.590   1
   5 -13  -1 70097.4 1111.59   1
   5 -13   1 69887.9 1176.99   1
   5 -13  -2 430.144 112.040   1
   5 -13   2 489.514 141.367   1
   5 -13  -3 6078.13 312.074   1
   5 -13   3 5435.39 378.197   1
   5 -13  -4 1910.30 183.002   1
   5 -13  -5 87323.1 1238.46   1
   5 -13  -6 47027.7 955.359   1
  -5  13   7 9060.68 572.182   6
   5 -13  -7 8782.92 428.484   1
   5  13  -8 488.775 139.884   3
   5 -13  -8 655.336 137.374   1
   5 -13   8 573.159 157.653   2
   5  13   8 635.113 143.169   2
  -5  13   8 632.958 178.320   6
   5  13   8 512.227 158.415   6
   5 -13  -9 2757.00 288.988   1
   5  13   9 2729.37 323.864   2
   5  13   9 2839.90 371.922   6
  -5  13   9 3065.05 375.475   6
   5  13  -9 2209.91 283.362   3
   5 -13   9 2337.90 336.826   2
   5  13  10 31153.1 1085.98   2
   5  13  10 32541.3 1261.53   6
   5 -13  10 29270.4 1153.06   2
   5 -13 -10 31406.4 1014.26   1
  -5  13  10 33312.7 1293.73   6
   5  13 -10 29718.6 1029.13   1
   5  13  11 202.167 180.545   6
   5 -13  11 55.2073 144.876   2
   5 -13 -11 381.318 171.501   1
   5  13  11 332.401 171.591   2
  -5  13  11 457.880 223.684   6
   5  13 -11 269.158 140.041   1
   5  13 -12 184.275 147.261   1
   5  13  12 120.127 146.740   6
   5 -13  12-72.5138 134.122   2
   5 -13 -12 297.760 157.693   1
   5  13  12 209.167 173.408   2
  -5  13  12 215.596 175.611   6
  -5  13  13 191.039 183.954   6
   5  13 -13 49.4265 89.1451   1
   5 -13  13 289.677 190.534   2
   5 -13 -13 228.419 166.270   1
   5  13  13 58.5582 147.857   2
   5  13  13 249.126 176.537   6
   5  13  14 5094.08 597.193   6
  -5  13  14 5051.74 587.546   6
   5 -13  14 4232.15 523.157   2
   5  13  14 4532.81 521.375   2
   5 -13  15 2346.42 391.658   2
   5  13  15 2661.08 410.012   2
  -5  13  15 2540.89 440.105   6
   5 -13  16 5515.68 602.649   2
   5  13  16 7207.16 653.543   2
  -5  13  16 6566.37 664.800   6
   5  13  17 1948.07 349.260   2
  -5  13  18 288.717 162.156   2
   5  13  18 248.738 162.145   2
   5  13  19 612.274 186.234   2
  -5  13  19 478.707 159.983   2
   5 -15   0 1020.12 175.569   1
   5 -15   1 224.530 122.688   1
   5 -15  -1 238.544 89.9549   1
   5 -15   2 391.602 127.158   1
   5 -15  -2 354.838 115.541   1
   5 -15   3 21970.5 831.979   1
   5 -15  -3 23387.2 668.560   1
   5 -15  -4 68425.1 1161.42   1
   5 -15  -5 67945.8 1178.65   1
   5 -15  -6 43661.1 968.736   1
   5 -15  -7 18001.6 659.839   1
  -5  15   7 18480.8 843.350   6
  -5  15   8 616.662 216.415   6
   5 -15   8 705.145 264.495   2
   5 -15  -8 550.643 134.651   1
   5  15   8 426.713 136.765   2
   5  15  -8 370.588 127.261   3
   5  15   8 458.969 148.415   6
  -5  15   9 853.872 216.251   6
   5  15  -9 691.948 193.058   3
   5 -15   9 495.533 171.434   2
   5  15   9 818.720 211.092   6
   5 -15  -9 800.705 173.730   1
   5  15   9 890.298 204.313   2
   5  15 -10 5036.02 426.844   1
   5 -15 -10 5196.90 441.128   1
   5  15  10 5268.97 473.758   2
   5 -15  10 4992.92 479.077   2
  -5  15  10 5919.81 557.043   6
   5  15  10 5628.24 531.398   6
   5  15 -11 231.036 114.703   1
   5 -15  11 274.923 127.949   2
   5 -15 -11 290.109 165.651   1
   5  15  11 9.40541 107.251   2
   5  15  11 476.246 200.511   6
  -5  15  11 220.554 195.938   6
   5  15  12 662.679 265.689   6
   5 -15  12 299.698 179.312   2
  -5  15  12 748.447 265.011   6
   5 -15 -12 632.707 204.285   1
   5  15 -12 233.078 93.5106   1
   5  15  12 298.375 169.543   2
   5  15 -13 1053.48 225.998   1
   5 -15  13 1597.81 313.171   2
  -5  15  13 985.668 265.541   6
   5  15  13 1356.60 259.507   2
   5 -15 -13 1129.07 262.022   1
   5  15  13 1550.78 343.083   6
   5  15  14 19042.0 1036.10   2
   5 -15  14 15677.7 1002.24   2
   5  15  14 18208.9 1074.36   6
  -5  15  14 17710.6 1065.62   6
   5  15  15 9726.27 746.392   2
  -5  15  15 9231.18 790.991   6
   5  15  16 17256.7 987.768   2
  -5  15  16 15633.4 1012.17   6
   5  15  17 5248.18 523.832   2
  -5  15  18 487.561 197.016   2
   5  15  18 401.583 175.006   2
   5  15  19 143.408 125.231   2
  -5  15  19 114.467 101.948   2
   5 -17   0 3170.33 300.605   1
   5 -17  -1 1982.48 235.583   1
   5 -17   1 2017.08 251.375   1
   5 -17  -2 1908.30 231.667   1
   5 -17   2 1792.44 252.541   1
   5 -17  -3 144256. 1829.35   1
   5 -17   3 137551. 2159.26   1
   5 -17  -4 42106.6 990.025   1
  -5  17   5 73716.6 1660.34   6
   5 -17  -5 75939.6 1343.88   1
  -5  17   6 53709.4 1419.83   6
   5 -17  -6 55115.3 1170.03   1
   5  17   6 48704.1 1305.46   4
   5  17  -6 46329.0 1177.99   3
   5  17  -7 11391.6 599.001   3
   5  17   7 12540.6 695.474   4
   5 -17  -7 13489.6 605.558   1
   5  17   7 12013.5 685.422   6
  -5  17   7 14453.7 767.371   6
   5  17   8 7253.63 563.950   6
   5  17   8 6719.21 478.256   2
   5  17  -8 6051.01 447.523   3
  -5  17   8 7785.56 597.161   6
   5 -17  -8 7183.35 463.605   1
  -5  17   9 236.645 118.134   6
   5 -17  -9 93.2743 87.3935   1
   5  17   9 108.694 126.908   2
   5  17   9-4.40054 119.538   6
   5  17  10 3162.18 420.118   6
   5  17  10 2806.47 350.249   2
   5 -17 -10 2801.95 338.840   1
  -5  17  10 2890.31 410.591   6
   5  17  11 458.276 168.358   2
   5  17  11 196.046 189.501   6
   5  17 -11 236.529 109.369   1
   5 -17 -11 52.0739 118.403   1
  -5  17  11-13.9592 151.528   6
   5  17  12 6968.17 660.739   6
  -5  17  12 7156.02 668.034   6
   5  17  12 7114.48 590.037   2
   5 -17 -12 6066.77 596.517   1
   5  17 -12 4720.07 442.747   1
   5  17 -13 1112.58 241.091   1
   5  17  13 2000.41 351.002   2
   5  17  13 1804.30 381.805   6
  -5  17  13 1941.27 387.758   6
   5  17  14 26764.8 1202.45   2
  -5  17  14 23791.7 1235.63   6
   5  17  14 25969.2 1271.10   6
   5  17  15 13856.7 890.090   2
   5  17  15 13063.2 894.383   6
  -5  17  15 11475.1 864.951   6
   5  17  16 23926.4 1159.82   2
  -5  17  16 22283.3 1191.63   6
  -5  17  17 8240.05 691.702   6
   5  17  17 8525.31 662.387   2
   5  17  18 1762.34 356.613   2
  -5  17  18 1825.92 306.118   2
   5  17  19 60.1966 92.3672   2
  -5  17  19 960.528 213.508   2
   5 -19   0 324.041 136.435   1
   5 -19   1 1937.73 263.243   1
   5 -19  -1 1967.95 253.085   1
   5 -19  -2 4463.53 365.173   1
   5 -19   2 3516.32 387.657   1
   5 -19   3 41770.3 1266.65   1
   5 -19  -3 41706.6 1087.68   1
   5 -19  -4 22709.6 794.426   1
  -5  19   4 20922.3 928.188   6
   5  19   4 21215.6 836.641   4
  -5  19   5 46104.8 1364.48   6
   5 -19  -5 47843.7 1153.95   1
   5  19   5 49765.6 1295.43   4
   5 -19  -6 44264.0 1135.56   1
  -5  19   6 42366.0 1318.02   6
   5  19   6 45125.9 1317.21   4
   5 -19  -7 14749.4 697.202   1
  -5  19   7 15673.4 826.836   6
   5  19   7 16509.7 828.254   4
   5  19   7 14652.5 770.535   6
   5 -19  -8 2575.89 310.182   1
  -5  19   8 2703.79 387.716   6
   5  19   8 2613.34 346.999   6
   5  19   8 2135.04 287.970   2
  -5  19   9 234.665 187.536   6
   5 -19  -9 138.815 86.7534   1
   5  19   9 374.126 330.420   6
   5  19   9 179.270 129.048   2
   5 -19 -10 2410.63 311.757   1
   5  19  10 2499.67 315.297   2
   5  19  10 3062.59 397.360   6
  -5  19  10 2993.31 432.517   6
   5  19 -11 111.479 113.861   1
   5 -19 -11 108.780 136.241   1
   5  19  11 371.215 185.945   2
   5  19  11 41.9783 117.923   6
  -5  19  11 261.220 222.645   6
   5  19 -12 488.933 155.491   1
   5  19  12 1355.88 276.653   2
   5  19  12 1001.03 270.920   6
   5 -19 -12 697.135 225.751   1
  -5  19  12 1640.20 348.133   6
   5  19  13 471.875 188.650   2
  -5  19  13 180.933 153.118   6
   5  19  14 15546.1 985.659   6
  -5  19  14 15160.4 1000.25   6
   5  19  14 16108.9 937.015   2
  -5  19  15 11093.1 857.198   6
   5  19  15 12751.0 851.409   2
   5  19  15 11848.6 843.070   6
   5  19  16 20090.9 1027.12   2
  -5  19  16 18509.8 1084.57   6
   5  19  17 7630.19 606.259   2
  -5  19  17 7630.16 664.404   6
  -5  19  18 676.911 184.815   2
   5  19  18 623.288 174.440   2
  -5  19  19-178.006 132.209   2
   5 -21   0 3284.85 382.430   1
   5 -21  -1 18848.9 825.394   1
   5 -21   1 19132.7 866.143   1
   5 -21  -2 956.759 201.354   1
   5  21   2 534.995 147.832   4
   5 -21   2 782.647 220.549   1
  -5  21   3 15125.6 815.338   6
   5 -21  -3 14576.3 691.510   1
   5  21   3 14848.1 698.252   4
   5 -21   3 15087.3 803.283   1
  -5  21   4 15884.2 861.285   6
   5 -21  -4 16423.2 733.880   1
   5  21   4 15178.5 747.075   4
  -5  21   5 28992.9 1161.36   6
   5  21   5 32311.4 1089.94   4
   5 -21  -5 30167.2 993.186   1
   5 -21  -6 18218.2 788.579   1
   5  21   6 18100.4 863.918   4
  -5  21   6 16984.5 886.731   6
  -5  21   7 1610.28 274.051   6
   5 -21  -7 1824.79 262.902   1
   5  21   7 2145.40 309.271   6
  -5  21   8 90.3612 115.623   6
   5 -21  -8 39.6209 115.594   1
   5  21   8 242.376 193.827   6
  -5  21   9 172.503 216.381   6
   5 -21  -9 201.819 135.349   1
   5  21   9 300.816 139.693   2
   5  21   9 83.5949 143.486   6
   5 -21 -10 11687.6 761.045   1
   5  21  10 12446.2 812.896   6
   5  21  10 13171.7 766.819   2
  -5  21  10 12981.8 869.301   6
   5  21 -11 391.120 126.399   1
   5 -21 -11 525.201 210.361   1
  -5  21  11 329.667 221.379   6
   5  21  11 528.077 222.222   6
   5  21  11 421.084 228.292   2
  -5  21  12 1891.99 349.887   6
   5  21  12 3012.36 432.556   6
   5 -21 -12 2082.93 368.510   1
   5  21  12 2671.80 387.833   2
  -5  21  13-113.752 198.202   6
   5  21  13 104.159 139.099   6
   5  21  13-267.923 135.449   2
   5  21  14 7523.64 652.183   2
   5  21  14 6976.21 658.618   6
  -5  21  14 7192.74 687.718   6
   5  21  15 4763.65 538.926   6
   5  21  15 4528.91 500.807   2
  -5  21  15 4312.07 530.062   6
  -5  21  16 7008.57 648.995   6
   5  21  16 7995.98 639.012   2
   5  21  17 2844.19 376.152   2
  -5  21  17 2978.02 370.783   2
  -5  21  18 362.401 151.510   2
   5  21  18 296.592 159.893   2
   5 -23   0 3184.22 409.802   1
   5 -23  -1 121568. 2245.17   1
   5  23   1 132267. 1996.28   4
   5 -23  -2 1753.73 304.356   1
   5 -23   2 1404.12 293.264   1
   5  23   2 1378.74 233.705   4
   5 -23  -3 4803.10 448.248   1
  -5  23   3 5100.50 488.334   6
   5  23   3 4175.37 393.867   4
   5 -23  -4 4139.29 399.052   1
  -5  23   4 3570.44 421.601   6
   5  23   4 2708.27 308.067   6
   5  23   4 3705.16 372.286   4
  -5  23   5 17196.4 907.275   6
   5 -23  -5 18980.0 844.486   1
   5  23   5 19260.6 875.472   4
  -5  23   6 4266.68 479.499   6
   5 -23  -6 4447.41 419.031   1
   5  23   6 4442.77 444.469   4
   5  23   6 4012.89 412.932   6
   5  23   7 30.2535 107.791   6
  -5  23   7 3.84319 122.714   6
  -5  23   8 2439.07 381.093   6
   5 -23  -8 2520.93 343.848   1
   5  23   8 2791.02 373.293   6
  -5  23   9 1550.61 325.274   6
   5 -23  -9 1537.64 261.887   1
   5  23   9 1767.19 328.369   6
   5  23  10 28787.1 1246.70   6
   5 -23 -10 25276.5 1202.61   1
  -5  23  10 26682.6 1275.75   6
  -5  23  11 1783.90 368.294   6
   5  23  11 1705.64 314.528   6
   5 -23 -11 1620.91 348.260   1
   5  23  11 1752.20 304.961   2
  -5  23  12 9079.24 779.813   6
   5  23  12 10043.6 764.699   6
   5  23  12 9838.23 727.774   2
   5  23  13-57.8050 132.920   2
   5  23  13 270.449 198.095   6
  -5  23  13 464.726 249.951   6
  -5  23  14 93.0584 190.918   6
   5  23  14 327.478 194.357   2
   5  23  14 210.746 218.838   6
   5  23  15 1776.71 325.292   2
   5  23  15 1110.40 267.768   6
  -5  23  15 1746.00 389.012   6
  -5  23  16 1549.60 315.715   6
   5  23  16 1318.92 232.259   2
  -5  23  17 116.058 105.931   2
   5  23  17 185.958 138.175   2
  -5  23  17 216.733 169.540   6
  -5  23  18 254.646 136.536   2
   5 -25   0 11058.2 783.621   1
   5  25   0 9687.83 585.009   4
   5 -25  -1 83911.0 2008.57   1
   5  25   1 79823.1 1655.51   4
   5 -25   1 79091.7 2170.45   1
   5 -25   2 3904.32 489.097   1
   5 -25  -2 3035.03 399.882   1
   5  25   2 2957.44 349.908   4
  -5  25   3 3052.48 406.867   6
   5  25   3 2770.54 334.772   4
   5 -25  -3 3032.73 381.583   1
   5 -25  -4 1559.08 271.626   1
   5  25   4 1101.91 216.867   6
  -5  25   4 1214.83 301.977   6
   5  25   4 1415.92 253.918   4
   5  25   5 2619.35 342.371   6
   5 -25  -5 2588.01 350.743   1
  -5  25   5 3140.26 419.770   6
   5  25   5 3340.20 392.348   4
  -5  25   6 3498.63 435.308   6
   5 -25  -6 4049.98 439.768   1
   5  25   6 4097.38 450.911   4
   5  25   6 3763.82 406.033   6
  -5  25   7 258.091 202.061   6
   5 -25  -7-46.6403 145.244   1
   5  25   7 52.7369 128.565   6
   5 -25  -8 16397.4 928.600   1
   5  25   8 17004.9 911.594   6
  -5  25   8 17149.8 998.747   6
   5 -25  -9 7885.72 684.991   1
  -5  25   9 7850.39 704.150   6
   5  25   9 8862.30 675.128   6
  -5  25  10 41786.7 1621.99   6
   5 -25 -10 38719.4 1587.74   1
  -5  25  11 1064.35 314.035   6
   5  25  11 997.424 296.327   6
  -5  25  12 13149.3 946.161   6
   5  25  12 14324.6 901.009   6
   5  25  13 785.296 231.963   6
   5  25  13 1179.07 253.691   2
  -5  25  13 914.593 307.401   6
  -5  25  14 858.926 280.473   6
   5  25  14 977.421 277.697   6
   5  25  15-190.110 172.372   2
  -5  25  15-161.162 163.319   6
   5  25  15 195.871 110.533   6
   5  25  16 233.493 146.642   2
  -5  25  16 103.582 129.144   6
  -5  25  17 146.576 126.280   6
  -5  25  17 7.55386 118.913   2
   5 -27   0 3813.89 519.866   1
   5  27   0 3891.22 402.364   4
   5 -27  -1 82961.6 2163.55   1
   5 -27   1 82530.0 2303.07   1
   5  27   1 80234.4 1742.04   4
   5  27  -1 79274.3 1706.33   4
   5 -27  -2 4024.95 486.660   1
   5  27   2 4138.23 418.404   4
  -5  27   3 4636.52 510.530   6
   5 -27  -3 4430.33 472.301   1
   5  27   3 4716.40 433.087   4
   5  27   4-171.811 135.187   6
  -5  27   4 234.380 181.836   6
   5 -27  -4 35.9912 134.343   1
   5  27   4 255.789 135.474   4
   5  27   5 3528.76 396.401   6
  -5  27   5 4419.58 510.460   6
   5  27   5 3836.69 423.208   4
   5 -27  -5 3928.37 439.777   1
   5  27   6 2191.97 324.225   6
   5 -27  -6 2132.50 362.958   1
   5  27   6 2091.55 336.609   4
  -5  27   6 1931.69 340.063   6
  -5  27   7 49.5051 142.087   6
   5  27   7 70.2529 108.048   6
   5 -27  -7-138.967 131.969   1
   5 -27  -8 18413.5 1073.28   1
   5  27   8 18924.3 981.503   6
  -5  27   8 18472.8 1065.37   6
   5  27   9 4709.28 501.416   6
  -5  27   9 5064.56 591.714   6
   5 -27  -9 4058.61 562.834   1
  -5  27  10 43631.9 1695.28   6
   5  27  10 44649.3 1559.91   6
   5  27  11 1996.66 338.980   6
  -5  27  11 2063.22 396.269   6
   5  27  12 11180.2 786.393   6
  -5  27  12 11153.6 877.349   6
   5  27  13 998.431 278.902   6
  -5  27  13 1192.09 283.696   6
   5  27  14-229.330 144.862   6
  -5  27  14 97.3977 185.968   6
  -5  27  15 179.553 182.409   6
   5  27  15-75.3410 112.081   6
  -5  27  16 61.1127 85.4623   2
  -5  27  16-67.9291 161.688   6
  -5  27  17 415.208 199.999   6
   5 -29   0 3056.78 472.540   1
   5  29   0 3538.91 398.370   4
   5 -29   1 29226.7 1447.58   1
   5 -29  -1 23676.9 1300.23   1
   5  29   1 25694.9 1034.97   4
   5  29  -1 28097.9 1079.94   4
   5 -29  -2 1788.34 366.084   1
   5  29   2 1343.96 246.307   4
   5  29  -2 1574.47 257.301   4
  -5  29   2 1221.97 328.094   6
   5  29  -3 0.81510 104.174   4
   5 -29  -3 39.4770 134.853   1
  -5  29   3-48.2362 156.774   6
   5  29   3-157.473 108.125   4
   5  29   4 199.097 121.569   4
  -5  29   4 448.284 213.475   6
   5 -29  -4 346.639 160.934   1
   5  29   4 191.391 110.382   6
   5  29   5 1288.17 256.615   6
  -5  29   5 1647.01 319.757   6
   5 -29  -5 1029.70 272.259   1
   5  29   5 1371.73 305.329   4
  -5  29   6 2429.93 382.792   6
   5  29   6 2938.08 393.685   6
   5 -29  -6 2633.23 398.468   1
   5 -29  -7 25.9590 132.867   1
  -5  29   7 245.330 212.049   6
   5  29   7 497.686 235.233   6
   5 -29  -8 2218.04 382.736   1
   5  29   8 2589.77 364.264   6
  -5  29   8 2746.49 421.414   6
   5  29   9 1237.31 291.665   6
  -5  29   9 1308.73 331.098   6
   5  29  10 27358.8 1210.54   6
  -5  29  10 26116.7 1303.16   6
   5  29  11 2399.66 381.689   6
  -5  29  11 2841.52 469.742   6
   5  29  12 9454.96 708.070   6
  -5  29  12 9670.64 808.371   6
   5  29  13 92.7937 114.470   6
  -5  29  13 171.296 201.913   6
   5  29  14 762.954 232.563   6
  -5  29  14 875.705 264.651   6
  -5  29  15 1242.10 261.970   6
  -5  29  16 1288.68 254.803   6
  -5  29  16 1388.12 212.086   2
   5 -31   0 927.078 293.118   1
   5  31   0 1123.82 238.704   4
   5  31   1 5701.13 511.670   4
   5  31  -1 5525.90 499.617   4
   5 -31  -1 5249.03 639.217   1
  -5  31   2 1361.06 305.155   6
   5  31   2 1160.86 261.189   4
   5  31  -2 921.475 224.982   4
   5 -31  -2 935.668 340.293   1
  -5  31   3 1246.77 297.422   6
   5 -31  -3 487.741 187.227   1
   5  31   3 1212.81 269.803   4
   5  31  -3 972.453 220.835   4
   5 -31  -4 1819.49 382.259   1
  -5  31   4 1459.20 326.304   6
   5  31   4 1322.15 273.247   4
   5  31  -4 1651.66 294.051   4
  -5  31   5 7684.52 695.671   6
   5 -31  -5 6344.45 634.585   1
   5  31   5 6591.38 565.065   6
   5  31   5 6642.97 618.218   4
   5  31  -5 8027.74 597.433   4
   5  31   6 4707.80 494.602   6
  -5  31   6 4670.95 535.626   6
   5  31  -6 5101.64 483.504   4
   5 -31  -6 4116.60 512.784   1
   5  31   7 5181.94 504.286   6
  -5  31   7 4996.58 567.546   6
   5  31  -7 4068.86 400.522   4
  -5  31   8 1312.52 325.610   6
   5  31   8 890.107 235.939   6
   5  31   9 67.8216 165.597   6
  -5  31   9-27.1075 168.213   6
   5  31  10 14451.0 881.598   6
  -5  31  10 14344.6 966.609   6
   5  31  11 1068.73 251.283   6
  -5  31  11 1356.59 332.409   6
  -5  31  12 1493.06 324.702   6
   5  31  12 1195.01 283.955   6
   5  31  13 105.945 144.413   6
  -5  31  13 91.7912 130.499   6
   5  31  14 5467.24 494.570   6
  -5  31  14 6353.46 595.932   6
  -5  31  15 3397.39 423.614   6
  -5  31  15 2696.58 291.676   2
   5  33   0 329.500 167.661   4
  -5  33   1 1805.36 352.156   6
   5  33   1 1651.28 304.704   4
   5  33  -1 1669.95 303.759   4
   5 -33  -1 1595.20 384.779   1
  -5  33   2 558.124 259.267   6
   5  33  -2 735.735 214.869   4
   5 -33  -2 679.577 326.006   1
   5  33   2 615.050 223.868   4
  -5  33   3 1520.61 355.984   6
   5 -33  -3 1422.22 380.658   1
   5  33   3 1577.44 312.899   4
   5  33  -3 1436.51 281.885   4
  -5  33   4 5933.20 626.610   6
   5 -33  -4 4231.91 592.582   1
   5  33   4 5250.90 528.303   4
   5  33  -4 6117.97 548.526   4
  -5  33   5 15680.1 974.645   6
   5  33  -5 15935.5 856.521   4
   5  33  -6 29850.6 1145.21   4
   5  33   6 26414.6 1159.62   6
  -5  33   6 30318.8 1374.04   6
   5  33   7 12051.8 785.583   6
  -5  33   7 14809.3 959.450   6
  -5  33   8 4012.15 521.703   6
   5  33   8 3862.50 466.118   6
  -5  33   9 277.459 204.860   6
   5  33   9 370.141 158.603   6
   5  33  10 4073.64 450.627   6
  -5  33  10 3942.77 519.807   6
   5  33  11 759.236 289.641   6
  -5  33  11 101.011 175.068   6
   5  33  12 117.475 119.378   6
  -5  33  12-35.7599 139.067   6
   5  33  13 279.690 128.134   6
  -5  33  13 164.089 140.580   6
  -5  33  14 6994.98 595.980   6
  -5  33  15 4794.08 451.775   6
   5  35   0 244.842 131.001   4
   5  35  -1 456.894 182.829   4
  -5  35   1 349.320 208.630   6
   5  35   1 477.910 167.720   4
   5  35  -2 987.343 233.984   4
   5  35   2 812.976 230.500   4
  -5  35   2 343.401 200.612   6
  -5  35   3 7006.40 654.419   6
   5  35  -3 7437.63 598.591   4
   5  35   3 6652.75 591.423   4
  -5  35   4 8892.89 734.400   6
   5  35  -4 9197.27 669.538   4
   5  35  -5 26870.1 1111.94   4
  -5  35   5 26617.7 1247.45   6
  -5  35   6 27565.4 1292.29   6
   5  35  -6 26490.9 1069.71   4
  -5  35   7 8410.24 716.087   6
  -5  35   8 1429.41 327.854   6
  -5  35   9 141.200 164.302   6
  -5  35  10 862.406 254.077   6
  -5  35  11 338.381 196.656   6
  -5  35  12 542.152 215.694   6
  -5  35  13 157.282 149.707   6
  -5  35  14 6590.89 517.237   6
   5  37   0 2700.98 385.290   4
  -5  37   0 2413.98 385.511   6
  -5  37   1 3038.26 448.244   6
   5  37   1 2812.46 390.286   4
   5  37  -1 3007.14 397.985   4
  -5  37   2 144.441 145.296   6
   5  37   2 37.7779 137.274   4
   5  37  -2 21.7081 115.016   4
  -5  37   3 6849.50 649.550   6
   5  37  -3 6690.53 579.565   4
  -5  37   4 8960.29 728.113   6
   5  37  -4 9913.90 684.000   4
   5  37  -5 17523.1 899.529   4
  -5  37   5 19132.2 1049.19   6
   5  37  -6 10013.4 645.366   4
  -5  37   6 11430.7 823.385   6
  -5  37   7 2290.41 392.192   6
  -5  37   8 455.439 219.540   6
  -5  37   9 210.518 184.732   6
  -5  37  10 2016.12 349.226   6
  -5  37  11 305.191 182.387   6
  -5  37  12-1.31131 112.293   6
  -5  37  13 270.802 126.729   6
   5  39   0 5794.46 584.744   4
  -5  39   0 6430.70 621.393   6
  -5  39   1 20469.0 1081.14   6
  -5  39  -1 20399.6 1050.80   6
   5  39   1 20079.6 1022.60   4
   5  39  -1 20486.0 1035.78   4
  -5  39   2 369.283 207.275   6
   5  39  -2 135.932 139.123   4
  -5  39   3 5566.05 555.276   6
   5  39  -3 4815.93 490.519   4
  -5  39   4 3168.75 429.270   6
   5  39  -4 3350.03 410.074   4
  -5  39   5 4345.20 491.683   6
   5  39  -5 3652.52 397.047   4
  -5  39   6 1976.19 329.842   6
  -5  39   7 9.91914 125.254   6
  -5  39   8 1679.19 329.677   6
  -5  39   9 1217.81 277.775   6
  -5  39  10 8145.49 621.946   6
  -5  39  11 1060.89 306.450   6
  -5  39  12 726.067 195.957   6
  -5  41   0 3704.67 468.131   6
  -5  41   1 26771.8 1187.57   6
  -5  41  -1 27686.6 1199.42   6
  -5  41   2 1324.98 266.152   6
  -5  41  -2 1856.21 332.388   6
   5  41  -2 1669.23 291.350   4
  -5  41   3 115.746 158.122   6
   5  41  -3 330.832 155.857   4
  -5  41  -3-29.1061 139.039   6
  -5  41   4 1190.19 283.534   6
   5  41  -4 979.592 225.673   4
  -5  41   5 1778.62 323.030   6
  -5  41   6-4.05614 108.387   6
  -5  41   7 980.630 260.128   6
  -5  41   8 8589.56 632.503   6
  -5  41   9 3344.29 386.850   6
  -5  41  10 13157.1 734.685   6
  -5  41  11 1056.03 219.723   6
  -5  43   0 4029.90 458.449   6
  -5  43  -1 23240.7 1050.24   6
  -5  43   1 22718.3 1022.14   6
  -5  43  -2 3398.96 414.773   6
  -5  43   2 2984.20 387.866   6
  -5  43   3 1931.57 313.864   6
  -5  43  -3 1895.36 307.667   6
  -5  43   4 528.318 189.539   6
  -5  43  -4 238.490 130.144   6
  -5  43   5 480.988 179.627   6
  -5  43   6 170.984 129.007   6
  -5  43   7 1588.77 282.525   6
  -5  43   8 8592.18 582.682   6
  -5  43   9 3703.79 379.984   6
  -5  45   0 4257.16 432.358   6
  -5  45   1 16424.7 820.613   6
  -5  45  -1 17055.3 846.956   6
  -5  45   2 701.965 179.434   6
  -5  45  -2 506.834 176.393   6
  -5  45   3 242.536 130.308   6
  -5  45  -3 584.272 221.896   6
  -5  45  -4 234.422 127.311   6
  -5  45   4 73.1845 98.0230   6
  -5  45  -5 496.583 148.378   6
  -5  45   5 681.049 195.128   6
  -5  45   6 253.556 112.430   6
  -5  45  -6 261.760 114.530   6
  -5  45   7-174.554 105.078   6
  -5  45  -7-70.9320 114.775   6
  -5  45   8 4513.18 391.115   6
  -5  47   0 1303.13 236.632   6
  -5  47  -1 6108.72 451.266   6
  -5  47   1 6130.94 462.410   6
  -5  47   2 90.0357 81.7129   6
  -5  47  -2 232.980 80.2992   6
  -5  47   3 32.2316 77.6781   6
  -5  47  -3 121.389 104.044   6
  -5  47  -4 982.062 192.415   6
  -5  47   4 578.897 135.665   6
  -5  47  -5 2352.42 284.449   6
  -5  47   5 2165.24 269.080   6
   6   0   0 56767.0 622.504   1
   6   0   1 15265.5 287.437   1
   6   0  -1 14814.4 352.183   1
   6   0   2 26632.9 313.593   1
   6   0  -2 29468.5 529.627   1
   6   0  -3 75060.9 907.210   1
   6   0  -4 192977. 1561.94   1
   6   0  -5 25813.7 614.461   1
   6   0  -6 33919.3 745.693   1
   6   0  -7 29881.8 754.760   1
   6   0  -8-4.84766 75.6971   1
   6   0   9 5263.66 473.438   2
   6   0  -9 4964.79 361.140   1
  -6   0  10 171.568 91.9323   6
   6   0  10 309.081 166.115   2
   6   0 -10 257.056 77.6533   1
   6   0 -11 1498.29 231.960   1
   6   0  11 1631.02 300.811   2
  -6   0  11 1469.92 280.793   6
   6   0 -12 122.555 124.418   1
   6   0  12-68.3820 159.212   2
   6   0 -13 5591.88 500.666   1
   6   0  13 6727.29 620.482   2
   6   0 -14 1963.04 304.197   1
   6   0  14 2812.03 421.238   2
   6   0  15 21234.8 1139.37   2
   6   0  16 9634.27 800.020   2
   6   0  17 4163.00 521.936   2
  -6   0  17 4423.76 526.934   2
   6   0  18 2652.38 407.579   2
  -6   0  18 2708.08 381.824   2
   6   0  19 287.860 187.616   2
  -6   0  19-45.8226 97.8356   2
   6   0  20 112.313 128.942   2
   6  -2   0 136990. 978.454   1
   6   2   0 136660. 981.904   1
   6   2  -1 898.329 97.2969   1
   6  -2  -1 1040.42 101.135   1
   6  -2   1 951.270 80.1043   1
   6   2   1 1002.81 84.0294   1
   6   2   2 2716.08 106.325   1
   6  -2  -2 2399.90 170.592   1
   6  -2   2 2700.77 109.816   1
   6   2  -2 2456.88 162.449   1
   6  -2  -3 1781.26 140.840   1
   6   2  -3 2057.23 157.971   1
   6  -2  -4 60275.7 860.717   1
   6   2  -4 58595.2 867.276   1
   6  -2  -5 26423.3 614.361   1
   6   2  -5 25969.5 617.718   1
   6  -2  -6 11593.0 435.697   1
   6   2  -6 11697.8 448.490   1
   6  -2  -7 24216.5 680.067   1
   6   2  -7 25275.0 695.698   1
   6  -2  -8 2598.21 245.140   1
   6   2  -8 2704.82 251.731   1
   6  -2   9 4180.21 406.876   2
   6   2   9 3809.18 386.837   2
   6   2  -9 4030.01 321.544   1
   6  -2  -9 3626.66 307.967   1
  -6   2  10 84.0238 126.704   6
   6   2 -10 108.723 81.2065   1
   6  -2 -10 164.739 98.3277   1
   6  -2  10 132.492 134.141   2
  -6  -2  10-4.85511 84.8781   6
   6   2  10 169.986 146.190   2
   6  -2 -11 3458.49 337.710   1
   6   2 -11 3237.39 338.275   1
  -6   2  11 2847.27 373.224   6
   6  -2  11 2973.62 389.329   2
   6   2  11 3270.31 396.658   2
  -6   2  12 246.260 144.987   6
   6   2 -12 184.468 151.091   1
   6  -2  12 29.2869 156.776   2
   6  -2 -12 242.661 155.686   1
   6   2  12 210.779 138.464   2
   6   2 -13 5220.31 481.612   1
   6  -2  13 6356.18 599.655   2
   6   2  13 5589.25 569.235   2
   6  -2 -13 5283.45 498.962   1
  -6   2  13 5188.88 532.649   6
   6  -2 -14 3008.44 409.369   1
   6   2 -14 2419.47 388.009   1
   6   2  14 4282.27 522.448   2
   6  -2  14 3568.73 501.834   2
   6  -2  15 22400.5 1184.72   2
   6   2  15 21690.6 1171.12   2
   6  -2  16 14755.2 974.371   2
   6   2  16 13817.2 939.217   2
  -6  -2  16 14234.9 871.919   2
   6   2  17 7202.16 669.150   2
  -6  -2  17 8165.98 655.404   2
   6  -2  17 6990.42 679.153   2
  -6   2  17 7948.79 655.432   2
  -6   2  18 85.7033 138.590   2
   6  -2  18-160.287 154.535   2
  -6  -2  18 68.3660 131.485   2
   6  -2  19 295.192 195.556   2
   6   2  19-72.1390 151.216   2
  -6   2  19 306.818 162.836   2
   6  -2  20 1162.06 279.649   2
   6   2  20 1060.29 247.348   2
   6  -4   0 126939. 995.728   1
   6  -4   1 1010.90 86.8977   1
   6  -4  -1 936.180 102.901   1
   6  -4  -2 96.5451 49.1472   1
   6  -4   2 96.6086 44.1793   1
   6  -4  -3 846.846 107.674   1
   6  -4   3 578.166 69.9020   1
   6   4   3 561.442 47.3157   1
   6   4  -4 235.862 76.1868   1
   6  -4  -4 248.018 72.4098   1
   6  -4  -5 32476.9 674.828   1
   6   4  -5 32115.8 705.088   1
   6  -4  -6 29475.2 689.246   1
   6   4  -6 29876.4 724.049   1
   6  -4  -7 466.499 118.148   1
   6   4  -7 427.134 120.171   1
   6  -4  -8 3564.20 274.562   1
   6   4  -8 3817.27 298.320   1
   6  -4  -9 40626.9 999.782   1
   6  -4   9 41434.2 1312.79   2
   6   4   9 40386.6 1199.25   2
   6   4   9 38582.4 1280.48   6
   6   4  -9 40873.3 1063.04   1
   6  -4 -10 3630.21 340.270   1
   6  -4  10 3968.56 451.224   2
   6   4  10 3787.74 396.288   2
   6   4 -10 4575.11 368.648   1
  -6   4  10 3247.12 373.887   6
   6  -4  11 21480.3 1017.71   2
   6  -4 -11 19871.7 817.915   1
   6   4  11 20637.1 948.622   2
  -6   4  11 18802.9 919.027   6
   6   4 -11 20075.2 849.749   1
   6  -4 -12 63.4630 99.9472   1
   6   4 -12 55.4330 141.952   1
   6  -4  12-26.9323 159.448   2
   6   4  12-94.4251 173.846   2
  -6   4  12-89.5730 143.455   6
   6   4 -13 752.450 212.704   1
   6   4  13 858.902 274.036   2
  -6   4  13 683.224 212.063   6
   6  -4 -13 804.358 223.789   1
   6  -4  13 713.726 269.159   2
   6  -4  14 344.155 224.681   2
   6   4  14 284.703 221.684   2
   6   4 -14 237.925 124.573   1
   6  -4 -14 124.423 101.186   1
  -6   4  14 102.060 161.249   6
   6   4  15 13259.1 891.669   2
   6  -4  15 12802.8 902.905   2
   6  -4  16 13026.7 922.042   2
   6   4  16 11435.4 843.918   2
  -6  -4  16 12605.3 803.708   2
   6  -4  17 1007.43 283.516   2
   6   4  17 1077.28 281.746   2
  -6   4  18 430.113 172.640   2
   6  -4  18 493.851 165.594   2
   6   4  18 310.055 193.713   2
   6   4  19 545.094 216.420   2
   6  -4  19 8.70584 141.765   2
  -6   4  19 386.119 167.016   2
   6  -4  20 4431.03 473.536   2
   6   4  20 4905.62 458.226   2
   6  -6   0 127762. 1075.85   1
   6  -6  -1 1266.11 125.612   1
   6  -6   1 1423.57 120.800   1
   6  -6   2 754.859 87.3454   1
   6  -6  -2 875.945 104.858   1
   6  -6  -3 866.630 114.456   1
   6  -6   3 730.423 88.9486   1
   6  -6  -4 643.493 96.7753   1
   6  -6  -5 2627.76 200.091   1
   6  -6  -6 5851.36 309.504   1
   6   6  -6 6518.64 345.830   1
   6  -6  -7 1948.75 200.390   1
   6   6  -7 2068.58 213.114   1
   6  -6   8 15988.2 776.060   2
   6  -6  -8 17372.5 609.465   1
   6   6   8 17552.2 756.778   2
   6   6  -8 16932.0 637.559   1
   6   6  -9 76627.1 1468.98   1
   6  -6   9 79152.9 1829.56   2
   6   6   9 74671.8 1786.34   6
   6  -6  -9 76159.8 1384.28   1
   6   6   9 77642.7 1674.93   2
  -6   6  10 669.090 193.349   6
   6   6 -10 759.085 186.699   1
   6   6  10 563.188 207.671   6
   6  -6 -10 628.522 156.274   1
   6  -6  10 602.325 198.309   2
   6   6  10 610.388 199.317   2
   6   6 -11 40327.6 1200.86   1
  -6   6  11 38299.8 1341.80   6
   6  -6 -11 36439.0 1127.82   1
   6   6  11 37694.1 1272.36   2
   6   6  11 40518.7 1446.81   6
   6  -6  11 38984.7 1379.29   2
  -6   6  12-82.0561 129.705   6
   6   6 -12 278.602 168.168   1
   6   6  12-49.4159 148.417   2
   6  -6  12 147.001 184.955   2
   6  -6 -12 79.5584 82.7141   1
   6   6 -13 1746.56 293.332   1
   6  -6  13 1788.32 346.577   2
   6   6  13 1593.90 340.596   2
   6  -6 -13 1577.01 281.907   1
  -6   6  13 2095.72 354.195   6
   6  -6 -14 1146.04 268.154   1
   6  -6  14 1760.78 366.436   2
   6   6 -14 983.045 226.123   1
   6   6  14 1481.25 330.034   2
  -6   6  14 1203.95 287.868   6
   6  -6  15 23139.8 1229.00   2
   6   6  15 22246.2 1152.80   2
   6  -6  16 2548.88 435.385   2
   6   6  16 2011.88 383.115   2
   6  -6  17 73.9699 153.473   2
   6   6  17 68.4485 179.314   2
   6  -6  18 4581.70 552.071   2
   6   6  18 4805.76 518.223   2
  -6   6  18 5261.82 523.991   2
   6  -6  19 2375.13 362.547   2
   6   6  19 2395.37 376.402   2
  -6   6  19 2305.24 322.999   2
  -6   6  20 10885.4 651.921   2
   6   6  20 14743.3 778.662   2
   6  -8   0 143815. 1247.55   1
   6  -8   1 3271.81 193.507   1
   6  -8  -1 2819.52 184.625   1
   6  -8   2 24476.6 537.862   1
   6  -8  -2 24993.7 538.011   1
   6  -8   3 789.951 114.304   1
   6  -8  -3 652.383 99.3286   1
   6  -8  -4 6409.80 304.751   1
   6  -8  -5 238.572 85.0034   1
   6  -8  -6-53.5520 65.2691   1
   6  -8  -7 2544.27 225.286   1
   6   8  -7 2438.82 240.207   1
   6  -8   8 2586.27 324.870   2
   6  -8  -8 2449.00 236.903   1
   6   8   8 2568.91 299.024   2
   6   8  -8 2589.46 265.242   1
  -6   8   9 109371. 2131.73   6
   6  -8   9 120193. 2201.61   2
   6  -8  -9 112808. 1698.30   1
   6   8   9 108012. 2162.15   6
   6   8   9 115645. 2032.78   2
   6   8  -9 115478. 1821.30   1
  -6   8  10 4323.32 440.320   6
   6   8  10 3921.47 400.748   2
   6  -8 -10 4359.16 367.864   1
   6  -8  10 3915.58 434.456   2
   6   8  10 4464.50 480.476   6
   6   8 -10 4146.53 387.508   1
  -6   8  11 82794.6 2021.49   6
   6   8  11 79375.3 1842.44   2
   6  -8 -11 77148.9 1614.66   1
   6  -8  11 80446.9 2013.36   2
   6   8  11 85826.8 2118.14   6
   6   8 -11 79765.1 1745.08   1
  -6   8  12 1599.42 322.729   6
   6   8 -12 1604.56 313.696   1
   6  -8 -12 1670.68 285.578   1
   6  -8  12 1662.54 353.341   2
   6   8  12 1147.05 266.622   2
   6   8  12 937.910 269.241   6
   6  -8  13 5906.26 621.456   2
   6  -8 -13 5783.61 540.867   1
  -6   8  13 6077.44 610.431   6
   6   8 -13 5423.86 543.038   1
   6  -8 -14 950.941 248.968   1
  -6   8  14 820.047 241.941   6
   6  -8  14 1185.57 328.247   2
   6   8  14 786.088 245.081   2
   6   8 -14 1297.32 403.119   1
   6   8  15 2485.24 439.418   2
   6  -8  15 2487.34 422.142   2
  -6   8  15 2340.41 419.291   6
   6  -8  16 1763.83 388.661   2
   6   8  16 1482.76 303.824   2
   6   8  17 130.575 176.445   2
   6  -8  17-41.0123 179.642   2
   6  -8  18 6583.07 648.544   2
   6   8  18 5915.98 577.630   2
  -6   8  18 7281.07 612.308   2
   6   8  19 4623.10 475.710   2
  -6   8  19 4141.37 437.564   2
   6  -8  19 3471.54 455.616   2
  -6   8  20 25149.6 933.114   2
   6   8  20 15141.6 777.373   2
   6 -10   0 179133. 1545.42   1
   6 -10   1 3646.67 235.551   1
   6 -10  -1 3473.87 221.687   1
   6 -10   2 49412.6 869.192   1
   6 -10  -2 49983.2 819.576   1
   6 -10   3 1023.28 140.857   1
   6 -10  -3 1016.34 130.311   1
   6 -10  -4 5653.84 293.136   1
   6 -10  -5 12244.4 445.229   1
   6 -10  -6 11951.5 458.585   1
   6 -10  -7 282.886 94.8537   1
   6 -10   8 4218.25 404.724   2
  -6  10   8 4285.82 418.381   6
   6  10   8 4139.75 376.421   2
   6 -10  -8 4525.08 323.997   1
   6  10  -8 3901.23 333.837   1
   6  10   9 48878.5 1455.11   6
   6 -10   9 51058.2 1450.59   2
   6  10  -9 52369.3 1270.95   1
   6  10   9 50798.1 1337.09   2
   6 -10  -9 50153.9 1146.00   1
  -6  10   9 54375.2 1520.86   6
   6 -10  10 6436.88 575.148   2
   6  10  10 7470.47 600.989   6
  -6  10  10 7349.51 589.978   6
   6  10  10 7266.29 553.939   2
   6 -10 -10 6783.66 458.189   1
   6  10 -10 7115.35 502.804   1
   6  10 -11 78501.3 1892.69   3
   6  10  11 83155.5 2089.30   6
   6  10  11 80012.5 1873.21   2
   6 -10 -11 80602.2 1702.57   1
  -6  10  11 84180.3 2081.98   6
   6 -10  11 84933.6 2121.23   2
   6  10 -11 81566.7 1777.17   1
   6  10 -12 93.0075 135.501   1
   6 -10  12 57.0125 146.691   2
   6 -10 -12 98.2950 110.677   1
   6  10  12 149.135 129.417   2
   6  10  12 217.843 209.787   6
  -6  10  12 292.557 166.368   6
   6  10 -13 76.4884 129.904   1
  -6  10  13-141.813 161.510   6
   6 -10 -13 142.610 162.109   1
   6 -10  13 49.3055 172.007   2
   6  10  13 17.0565 130.965   2
   6 -10  14 140.124 186.809   2
   6  10 -14 249.755 135.243   1
   6  10  14 99.3069 202.623   2
  -6  10  14 89.7658 160.398   6
   6 -10  15 496.924 232.809   2
  -6  10  15 492.752 245.540   6
   6  10  15 456.099 214.270   2
   6 -10  16 264.828 214.976   2
   6  10  16 367.718 202.836   2
   6 -10  17 331.914 230.175   2
   6  10  17 162.506 156.672   2
   6  10  18 5065.44 519.736   2
   6 -10  18 4174.00 496.631   2
  -6  10  18 5014.14 518.306   2
   6  10  19 2056.18 306.085   2
  -6  10  19 2064.08 295.482   2
   6  10  20 7825.27 547.102   2
   6 -12   0 191319. 1789.52   1
   6 -12   1 1727.26 189.729   1
   6 -12  -1 1713.03 179.873   1
   6 -12   2 27870.5 731.439   1
   6 -12  -2 28425.4 667.614   1
   6 -12  -3 217.562 76.8090   1
   6 -12   3 308.977 116.143   1
   6 -12  -4 8381.53 376.587   1
   6 -12  -5 36139.2 800.377   1
   6 -12  -6 28528.7 741.695   1
  -6  12   7 7734.40 535.627   6
   6 -12  -7 7913.77 416.057   1
   6 -12   8 408.147 174.545   2
  -6  12   8 428.316 158.521   6
   6  12  -8 540.888 151.795   3
   6 -12  -8 312.851 97.1114   1
   6  12   8 419.841 131.372   2
   6  12   8 377.627 133.326   6
   6  12   9 39599.8 1207.01   2
   6 -12  -9 39884.5 1059.20   1
   6  12   9 38951.7 1319.42   6
  -6  12   9 43478.6 1381.72   6
   6  12  -9 41112.4 1164.36   1
   6 -12   9 39561.3 1299.39   2
   6  12 -10 1522.80 275.707   3
   6  12 -10 1267.96 235.279   1
   6 -12 -10 1459.99 235.924   1
   6  12  10 1749.39 297.889   2
  -6  12  10 1546.42 304.579   6
   6  12  10 1836.75 319.897   6
  -6  12  11 35804.2 1387.10   6
   6  12  11 34458.9 1223.04   2
   6 -12  11 34345.1 1353.99   2
   6 -12 -11 33674.6 1116.54   1
   6  12  11 36316.1 1397.54   6
   6  12 -11 32722.3 1131.12   1
   6  12  12 719.881 250.439   6
   6  12 -12 469.100 188.296   1
   6 -12 -12 298.237 154.930   1
  -6  12  12 602.212 228.127   6
   6 -12  12 715.467 259.135   2
   6  12  12 656.436 225.761   2
  -6  12  13 248.567 153.047   6
   6 -12  13 209.345 179.347   2
   6 -12 -13 372.408 209.996   1
   6  12 -13 1030.45 411.577   1
   6  12  13 351.608 180.882   2
   6  12  13 643.902 284.989   6
   6 -12  14 1398.45 352.282   2
   6  12  14 1531.89 318.176   2
  -6  12  14 1237.92 260.972   6
  -6  12  15 5396.00 596.756   6
   6  12  15 5443.33 569.450   2
   6 -12  15 4487.83 590.087   2
   6 -12  16 3248.23 490.883   2
   6  12  16 3918.74 492.908   2
  -6  12  16 3631.21 499.179   6
   6 -12  17 91.6025 209.164   2
   6  12  17-46.9525 139.312   2
   6 -12  18 955.683 263.164   2
   6  12  18 1069.00 254.088   2
  -6  12  18 1192.37 261.016   2
  -6  12  19 541.142 197.290   2
   6  12  19 673.642 187.959   2
   6 -14   0 92095.4 1371.96   1
   6 -14   1 1402.75 193.893   1
   6 -14  -1 1457.96 182.321   1
   6 -14   2 907.316 167.888   1
   6 -14  -2 786.518 140.735   1
   6 -14  -3 6635.38 353.666   1
   6 -14   3 5439.81 404.443   1
   6 -14  -4 96069.0 1338.83   1
   6 -14  -5 50584.9 1002.54   1
   6 -14  -6 50999.0 1040.99   1
   6 -14  -7 36335.0 930.245   1
   6  14  -7 33643.4 1035.41   3
  -6  14   7 36454.7 1170.16   6
  -6  14   8 203.813 122.514   6
   6  14   8 81.1916 94.2233   2
   6 -14  -8 1.27732 62.8852   1
   6  14   8 79.1144 133.803   6
   6  14   9 19956.2 957.259   6
   6  14   9 20620.1 889.869   2
   6 -14  -9 20103.1 773.338   1
  -6  14   9 21687.8 1014.88   6
   6  14  -9 18970.7 836.998   3
   6 -14   9 17966.8 942.151   2
   6  14 -10 1988.52 292.931   3
   6  14 -10 2166.61 284.914   1
   6 -14  10 2161.67 375.380   2
   6  14  10 2303.38 322.919   2
   6 -14 -10 2520.13 302.326   1
   6  14  10 2462.90 366.574   6
  -6  14  10 2173.81 348.773   6
   6  14  11 1190.78 270.489   6
   6 -14  11 1206.49 299.823   2
   6 -14 -11 1074.66 215.674   1
   6  14 -11 834.451 187.755   1
   6  14  11 1294.36 250.681   2
  -6  14  11 1633.27 325.899   6
   6  14 -12 95.0772 113.146   1
   6 -14  12-0.96929 141.680   2
   6 -14 -12-108.921 86.9929   1
   6  14  12 202.836 144.098   2
   6  14  12 342.664 187.511   6
  -6  14  12 274.183 165.042   6
   6 -14 -13 3344.99 422.793   1
   6  14  13 4244.93 487.745   2
   6 -14  13 3814.11 536.743   2
   6  14  13 4468.80 533.599   6
  -6  14  13 4489.31 528.384   6
   6  14 -13 3017.05 374.044   1
  -6  14  14 1477.74 330.352   6
   6 -14  14 1440.58 355.676   2
   6  14  14 1870.88 344.605   2
   6 -14  15 17911.7 1113.33   2
  -6  14  15 20109.4 1141.42   6
   6 -14  16 6444.36 643.416   2
   6  14  16 7326.93 639.902   2
  -6  14  16 7176.72 667.254   6
   6  14  17 3068.55 415.727   2
   6  14  18-20.5733 135.009   2
  -6  14  18-48.2867 124.650   2
   6  14  19 298.522 150.379   2
  -6  14  19 195.818 141.833   2
   6 -16   0 36194.7 940.191   1
   6 -16  -1 1126.70 177.112   1
   6 -16   1 1077.07 179.407   1
   6 -16   2 14875.5 648.482   1
   6 -16  -2 15807.3 596.081   1
   6 -16  -3 30348.6 804.910   1
   6 -16   3 21381.0 833.664   1
   6 -16  -4 79688.4 1315.20   1
   6 -16  -5 54087.1 1116.98   1
   6 -16  -6 50578.2 1108.44   1
  -6  16   6 49842.5 1348.32   6
   6  16   7 19342.1 863.466   6
   6  16   7 19405.2 803.668   2
  -6  16   7 26223.5 1022.79   6
   6  16   7 19718.3 858.647   4
   6 -16  -7 23966.6 795.978   1
   6  16  -7 22594.3 861.940   3
   6 -16  -8 1086.08 192.802   1
   6 -16   8 843.972 224.757   2
   6  16   8 859.426 180.161   2
   6  16  -8 793.168 190.231   3
  -6  16   8 1067.23 242.775   6
   6  16   8 842.094 189.958   6
  -6  16   9 3506.79 432.450   6
   6 -16   9 3018.42 391.197   2
   6  16   9 3691.78 379.195   2
   6 -16  -9 3567.17 351.762   1
   6  16   9 3703.73 429.306   6
   6  16  -9 3577.88 366.345   3
   6  16 -10 159.089 117.091   1
   6 -16  10-83.7594 219.236   2
   6 -16 -10 91.4676 107.053   1
   6  16  10-86.6125 102.467   2
   6  16  10 128.544 153.110   6
   6  16 -10 115.864 100.051   3
   6  16 -11 1100.71 232.599   1
   6 -16  11 1734.12 345.782   2
   6  16  11 1373.46 315.460   6
   6 -16 -11 1269.23 244.611   1
   6  16  11 1135.49 249.718   2
   6  16 -12 760.617 262.612   1
   6 -16  12 486.319 195.274   2
   6 -16 -12 529.407 264.703   1
   6  16  12 397.390 193.997   2
   6  16  12 107.062 180.911   6
  -6  16  12 370.596 217.151   6
   6  16  13 14678.3 951.582   6
  -6  16  13 15603.7 1030.45   6
   6  16  13 15398.6 897.645   2
   6 -16  13 13430.5 914.526   2
   6  16  14 8676.63 720.367   6
   6  16  14 9216.87 735.822   2
   6 -16  14 8273.47 718.450   2
  -6  16  14 9175.63 781.804   6
   6  16  15 31876.4 1333.52   2
  -6  16  15 31420.5 1404.75   6
  -6  16  16 15147.1 969.567   6
   6  16  16 15650.2 947.008   2
   6  16  17 4464.93 479.833   2
   6  16  18 276.193 150.771   2
  -6  16  18 374.531 155.389   2
   6  16  19 15.1419 100.368   2
  -6  16  19-32.3516 108.195   2
   6 -18   0 652.904 172.888   1
   6 -18  -1 257.947 97.9859   1
   6 -18   1 398.345 158.051   1
   6 -18   2 25444.7 918.458   1
   6 -18  -2 26517.3 836.285   1
   6 -18  -3 9426.57 502.424   1
   6 -18   3 8933.32 608.245   1
   6 -18  -4 67818.7 1331.73   1
  -6  18   4 69206.5 1639.32   6
   6  18  -4 65401.0 1373.62   3
   6  18   4 65305.2 1442.57   4
  -6  18   5 44379.4 1351.37   6
   6  18   5 41387.2 1223.62   4
   6  18  -5 44079.9 1159.02   3
   6 -18  -5 44830.9 1096.27   1
  -6  18   6 48470.7 1401.92   6
   6  18   6 49009.2 1341.87   4
   6  18  -6 47154.9 1235.69   3
   6 -18  -6 48164.6 1152.11   1
   6  18   7 32555.6 1158.59   4
   6  18  -7 35296.5 1100.30   3
  -6  18   7 34820.1 1229.95   6
   6 -18  -7 35164.2 1023.86   1
  -6  18   8 396.498 210.268   6
   6  18   8 491.679 194.551   6
   6 -18  -8 310.163 126.019   1
   6  18   8 255.423 122.358   2
   6  18  -8 301.043 129.438   3
  -6  18   9 2087.84 338.281   6
   6 -18  -9 2063.31 271.725   1
   6  18   9 1808.20 291.309   2
   6  18  -9 1547.95 261.237   3
   6  18   9 1701.96 288.560   6
  -6  18  10 38.7157 156.646   6
   6  18  10 252.769 160.790   2
   6 -18 -10 90.8220 154.074   1
   6  18  10 115.903 141.387   6
   6  18 -11 397.376 181.042   1
   6  18  11 106.150 121.840   2
   6 -18 -11 231.991 126.506   1
  -6  18  11 313.895 144.807   6
  -6  18  12 122.792 163.248   6
   6  18  12 350.910 200.524   6
   6  18 -12 69.7914 103.012   1
   6  18  12 199.422 120.544   2
   6 -18 -12 226.232 153.150   1
   6  18  13 19114.4 1011.32   2
  -6  18  13 18750.4 1103.31   6
   6  18  13 17553.9 1030.83   6
   6  18  14 5212.31 544.597   2
  -6  18  14 5300.57 596.838   6
   6  18  14 5424.35 590.660   6
   6  18  15 43402.8 1534.35   2
  -6  18  15 42984.0 1658.72   6
   6  18  16 19739.9 1032.76   2
  -6  18  16 18484.7 1050.80   6
   6  18  17 6603.37 573.494   2
  -6  18  17 6120.08 585.072   6
   6  18  18 1002.99 238.029   2
  -6  18  18 1305.17 236.775   2
  -6  18  19 177.189 151.001   2
   6 -20   0 29537.5 1021.42   1
   6 -20   1 491.220 175.359   1
   6 -20  -1 58.4903 113.433   1
   6 -20   2 70.9082 117.982   1
   6 -20  -2 137.790 122.721   1
   6 -20   3 6032.13 529.474   1
   6 -20  -3 6068.05 437.705   1
  -6  20   3 5519.71 509.469   6
   6  20   3 5728.18 436.811   4
   6 -20  -4 59457.1 1349.72   1
   6  20   4 60563.9 1466.33   4
  -6  20   4 63391.8 1692.97   6
   6 -20  -5 33102.1 1015.49   1
  -6  20   5 34104.6 1221.87   6
   6  20   5 33821.8 1116.02   4
  -6  20   6 23077.8 1014.08   6
   6 -20  -6 22333.8 847.289   1
   6  20   6 23803.6 978.098   4
   6 -20  -7 25343.6 936.217   1
  -6  20   7 25828.2 1093.58   6
   6  20   7 27658.3 1109.16   4
  -6  20   8 938.850 272.252   6
   6 -20  -8 883.179 207.282   1
   6  20   8 1048.14 233.829   6
   6 -20  -9 6788.20 526.685   1
   6  20   9 6571.20 536.584   2
  -6  20   9 7098.82 615.744   6
   6  20   9 6713.76 569.044   6
   6  20  10 1069.85 244.053   6
  -6  20  10 703.360 258.346   6
   6  20  10 1565.89 309.057   2
   6 -20 -10 743.916 218.145   1
   6 -20 -11 3534.95 448.085   1
   6  20  11 3918.72 448.771   2
   6  20  11 3972.39 464.136   6
  -6  20  11 4068.24 502.742   6
   6  20 -11 2785.61 354.546   1
   6  20  12 180.437 165.203   2
   6  20  12 124.732 118.822   6
  -6  20  12 280.214 200.447   6
  -6  20  13 1233.45 304.360   6
   6  20  13 1497.37 321.022   2
   6  20  13 1071.71 260.911   6
   6  20  14 4655.85 528.330   2
   6  20  14 4323.16 504.833   6
  -6  20  14 4078.19 528.938   6
   6  20  15 21323.2 1077.70   2
  -6  20  15 19598.1 1102.49   6
   6  20  16 10880.8 740.459   2
  -6  20  16 10072.4 761.550   6
  -6  20  17 3603.25 433.927   6
   6  20  17 4213.75 452.052   2
   6  20  18 183.549 125.299   2
  -6  20  18-108.556 120.340   2
   6 -22   0 94870.9 1989.41   1
   6 -22   1 2667.06 373.927   1
   6 -22  -1 3102.12 389.433   1
   6 -22  -2 3494.29 372.827   1
   6 -22   2 3088.10 404.420   1
   6  22   2 3613.57 339.911   4
  -6  22   3 1393.50 292.458   6
   6 -22   3 1974.62 334.403   1
   6 -22  -3 1140.77 215.333   1
   6  22   3 1113.07 202.517   4
   6 -22  -4 25278.8 953.281   1
  -6  22   4 26399.3 1120.72   6
   6  22   4 24867.5 966.198   4
  -6  22   5 27317.7 1145.30   6
   6 -22  -5 26422.6 975.188   1
   6  22   5 27434.0 1046.04   4
  -6  22   6 12400.9 767.397   6
   6 -22  -6 12586.4 679.153   1
   6  22   6 13355.9 763.782   4
  -6  22   7 1892.49 338.811   6
   6 -22  -7 1941.56 288.072   1
   6  22   7 1608.91 285.234   6
   6  22   7 2202.99 329.664   4
  -6  22   8 270.411 137.440   6
   6 -22  -8 476.464 164.533   1
   6  22   8 434.280 170.091   6
   6  22   9 9837.16 701.994   6
   6 -22  -9 9544.45 661.456   1
  -6  22   9 10674.2 778.006   6
  -6  22  10 1961.98 371.984   6
   6 -22 -10 1770.14 315.229   1
   6  22  10 1384.39 280.639   6
   6 -22 -11 16804.2 1002.96   1
   6  22  11 19059.8 966.987   2
   6  22  11 18535.9 1010.97   6
  -6  22  11 19369.8 1101.24   6
   6  22  12 1733.06 320.346   6
   6  22  12 1143.31 287.016   2
  -6  22  12 974.076 301.944   6
  -6  22  13 708.325 277.568   6
   6  22  13 716.599 258.530   2
   6  22  13 341.367 151.143   6
   6  22  14 885.196 216.266   2
   6  22  14 944.659 243.396   6
  -6  22  14 1102.56 267.745   6
   6  22  15 8636.47 670.256   2
  -6  22  15 7836.29 694.574   6
  -6  22  16 3990.16 493.065   6
   6  22  16 3554.19 417.065   2
  -6  22  17 444.807 170.680   2
   6  22  17 458.512 167.054   2
  -6  22  17 423.833 196.319   6
  -6  22  18 339.730 126.104   2
   6 -24   0 209180. 3172.39   1
   6 -24   1 6834.72 628.891   1
   6 -24  -1 7989.51 619.132   1
   6 -24   2 21228.8 1118.07   1
   6  24   2 21434.3 853.934   4
   6 -24  -2 22790.7 1009.91   1
   6 -24  -3 184.011 142.131   1
  -6  24   3 337.522 190.155   6
   6  24   3 174.561 109.012   4
  -6  24   4 6443.98 564.677   6
   6 -24  -4 6498.74 531.349   1
   6  24   4 7630.63 550.235   4
  -6  24   5 8212.98 672.535   6
   6 -24  -5 7383.57 560.560   1
   6  24   5 7401.49 565.036   4
   6 -24  -6 6157.47 516.765   1
   6  24   6 6629.44 555.095   4
  -6  24   6 6477.04 577.593   6
  -6  24   7 1653.95 305.287   6
   6 -24  -7 1803.98 301.395   1
   6  24   7 1909.61 304.289   6
   6 -24  -8 4250.38 457.105   1
   6  24   8 4602.19 469.168   6
  -6  24   8 4230.13 512.067   6
   6 -24  -9 19921.4 1038.98   1
   6  24   9 21428.1 1037.74   6
  -6  24   9 21263.6 1117.65   6
   6  24  10 2615.67 403.468   6
  -6  24  10 2618.58 424.421   6
   6 -24 -10 2470.52 396.630   1
  -6  24  11 52479.6 1832.91   6
   6  24  11 50185.5 1639.52   6
   6  24  12 329.859 148.561   6
  -6  24  12 393.604 228.827   6
   6  24  13 5926.80 574.024   2
   6  24  13 5904.22 579.998   6
  -6  24  13 6071.18 626.788   6
  -6  24  14 113.284 185.597   6
   6  24  14 28.2891 175.564   6
   6  24  14 317.690 184.410   2
  -6  24  15 742.589 215.065   6
   6  24  15 1280.01 281.530   2
   6  24  16 1087.73 235.113   2
  -6  24  16 1067.25 259.545   6
  -6  24  17 138.145 174.684   6
  -6  24  17-39.5887 95.3053   2
   6 -26   0 146520. 2864.05   1
   6 -26  -1 7605.47 667.687   1
   6  26   1 7144.81 520.783   4
   6 -26   1 7223.13 709.535   1
   6 -26   2 26837.4 1284.71   1
   6 -26  -2 23900.8 1117.23   1
   6  26   2 23785.9 945.349   4
  -6  26   3 77.5596 149.725   6
   6 -26  -3 260.951 185.757   1
   6  26   3 13.0501 106.157   4
   6 -26  -4 1214.09 271.460   1
   6  26   4 1020.07 226.618   4
  -6  26   5 2999.48 432.618   6
   6 -26  -5 2765.77 372.998   1
   6  26   5 2815.26 358.765   4
   6 -26  -6 4841.91 493.311   1
  -6  26   6 5380.19 555.834   6
   6  26   6 5256.54 515.100   4
  -6  26   7 257.894 218.217   6
   6  26   7-58.9055 116.045   6
   6 -26  -7 290.855 147.736   1
  -6  26   8 3019.07 442.780   6
   6 -26  -8 2793.73 434.386   1
   6  26   8 2754.19 375.478   6
   6 -26  -9 71889.8 2093.48   1
   6  26   9 78984.2 2005.86   6
  -6  26   9 77904.7 2196.18   6
   6  26  10 4213.76 487.649   6
  -6  26  10 4613.17 594.874   6
  -6  26  11 12900.7 916.180   6
   6  26  11 12101.1 806.793   6
   6  26  12 2935.06 406.515   6
  -6  26  12 3036.53 472.912   6
   6  26  13 4103.55 473.451   6
  -6  26  13 4635.10 566.526   6
   6  26  14-87.4753 101.620   6
  -6  26  14-323.635 195.266   6
  -6  26  15 485.041 222.691   6
  -6  26  16 170.966 148.846   6
  -6  26  17-50.8263 78.0599   2
  -6  26  17-26.0818 128.508   6
   6 -28   0 70561.4 2250.91   1
   6  28   0 79086.3 1744.74   4
   6 -28   1 3758.26 526.355   1
   6 -28  -1 4108.94 517.616   1
   6  28   1 3687.36 395.026   4
   6  28  -1 4205.49 435.180   4
   6  28   2 14367.3 765.473   4
   6 -28  -2 15889.8 957.746   1
  -6  28   2 17146.6 974.611   6
  -6  28   3 2.03379 157.468   6
   6 -28  -3-141.835 170.720   1
   6 -28  -4 1200.23 278.504   1
   6  28   4 955.103 207.650   4
  -6  28   4 1253.76 292.813   6
   6 -28  -5 3419.31 465.495   1
   6  28   5 3331.53 404.437   4
  -6  28   5 3511.33 475.417   6
  -6  28   6 1167.94 271.669   6
   6 -28  -6 1241.94 291.797   1
   6  28   6 1305.34 276.507   4
   6 -28  -7 196.257 152.620   1
  -6  28   7 226.093 179.823   6
   6 -28  -8 4464.37 551.086   1
   6  28   8 4964.69 500.858   6
   6  28   9 39599.7 1416.84   6
  -6  28   9 41527.8 1630.86   6
   6  28  10 1875.32 363.148   6
  -6  28  10 1927.15 397.653   6
  -6  28  11 30340.2 1412.63   6
   6  28  11 29306.4 1230.84   6
   6  28  12 922.876 225.157   6
  -6  28  12 707.698 238.735   6
  -6  28  13 1135.32 274.905   6
   6  28  13 1140.75 263.962   6
  -6  28  14 141.344 143.438   6
   6  28  14 320.145 145.409   6
  -6  28  15 1757.15 310.402   6
  -6  28  16 92.1932 155.249   6
  -6  28  16 248.661 124.471   2
   6  30   0 31199.8 1154.08   4
   6 -30   0 29102.8 1507.39   1
   6  30   1 1944.05 319.955   4
   6  30  -1 1870.95 300.256   4
   6 -30  -1 1533.36 405.013   1
   6 -30  -2 62.2790 133.476   1
  -6  30   2 521.840 335.896   6
   6  30   2 324.647 162.572   4
   6  30  -2 134.303 130.425   4
  -6  30   3-240.492 162.099   6
   6 -30  -3 12.5143 121.100   1
   6  30   3 80.7054 107.906   4
   6  30  -3 147.729 114.542   4
   6 -30  -4 3239.73 446.473   1
  -6  30   4 4478.60 527.005   6
   6  30   4 3521.25 413.606   4
   6 -30  -5 4472.72 563.290   1
   6  30   5 5089.15 516.073   4
  -6  30   6 5131.82 564.334   6
   6 -30  -6 4070.38 520.358   1
  -6  30   7 223.512 157.326   6
   6 -30  -7-99.4200 144.598   1
  -6  30   8 140.437 141.939   6
  -6  30   9 4863.15 580.048   6
  -6  30  10 3612.58 522.866   6
   6  30  10 3275.05 417.666   6
  -6  30  11 21506.4 1179.76   6
   6  30  11 19413.1 981.734   6
   6  30  12 347.187 185.433   6
  -6  30  12 383.001 210.091   6
  -6  30  13 1357.95 411.833   6
  -6  30  14 1087.20 275.982   6
  -6  30  15 6591.89 568.401   6
  -6  30  16 1596.86 326.679   6
   6 -32   0 9587.37 892.858   1
   6  32   0 9375.83 667.125   4
  -6  32   1 537.774 200.258   6
   6  32   1 518.057 181.704   4
   6  32  -1 329.027 122.265   4
   6 -32  -1 136.996 152.836   1
   6 -32  -2 345.736 283.315   1
   6  32   2 321.544 166.057   4
   6  32  -2 62.3026 100.326   4
  -6  32   2 637.534 281.169   6
  -6  32   3 1495.51 340.891   6
   6  32  -3 1670.49 294.439   4
   6 -32  -3 1290.15 337.837   1
   6  32   3 1426.08 262.703   4
  -6  32   4 12625.2 868.740   6
   6 -32  -4 11236.7 894.428   1
   6  32   4 12241.2 769.237   4
   6  32  -4 12087.6 746.462   4
   6  32   5 14788.6 874.928   4
   6  32  -5 16486.0 866.667   4
  -6  32   5 14642.6 954.703   6
  -6  32   6 11884.4 856.523   6
   6  32  -6 11382.8 721.373   4
  -6  32   7 9300.20 763.722   6
   6  32  -7 8775.03 610.373   4
  -6  32   8 1952.02 381.909   6
  -6  32   9 7302.65 693.245   6
  -6  32  10 934.052 258.568   6
  -6  32  11 3381.10 469.509   6
  -6  32  12 142.404 202.574   6
  -6  32  13 2937.87 419.355   6
   6 -32 -13 2556.88 278.158   5
  -6  32  14 2200.28 337.117   6
   6 -32 -14 1399.56 203.343   5
  -6  32  15 7820.30 579.094   6
   6  34   0 1592.63 275.318   4
  -6  34   1 2099.91 376.994   6
   6  34  -1 2693.25 358.195   4
   6  34   1 2164.36 320.424   4
  -6  34   2 548.808 267.635   6
   6  34   2 441.007 177.632   4
   6  34  -2 423.129 171.893   4
   6  34   3 2204.09 375.424   4
  -6  34   3 1529.81 337.509   6
   6  34  -3 1568.70 296.817   4
  -6  34   4 25958.9 1248.67   6
   6  34   4 25471.4 1141.02   4
   6  34  -4 25764.9 1124.97   4
   6  34  -5 19998.7 976.698   4
  -6  34   5 19588.9 1073.26   6
   6  34  -6 24760.2 1070.30   4
  -6  34   6 24201.6 1213.49   6
   6  34  -7 28601.3 1114.36   4
  -6  34   7 32279.1 1418.68   6
  -6  34   8 176.701 189.564   6
  -6  34   9 631.535 228.421   6
  -6  34  10 267.947 154.306   6
  -6  34  11 831.244 281.358   6
  -6  34  12 74.5884 141.193   6
  -6  34  13 2071.70 335.137   6
  -6  34  14 2440.68 322.604   6
  -6  36   0 21713.6 1119.03   6
   6  36   0 22313.6 1041.88   4
  -6  36   1 821.042 246.370   6
   6  36   1 554.026 207.117   4
   6  36  -1 309.179 151.674   4
   6  36   2 513.459 181.238   4
   6  36  -2 808.221 209.393   4
  -6  36   2 704.979 260.923   6
  -6  36   3 4428.55 526.645   6
   6  36   3 4020.07 454.429   4
   6  36  -3 4827.71 501.827   4
  -6  36   4 19539.7 1062.38   6
   6  36  -4 20378.0 989.894   4
  -6  36   5 17703.1 1016.85   6
   6  36  -5 20320.3 977.669   4
  -6  36   6 22840.2 1162.71   6
   6  36  -6 22300.9 995.282   4
  -6  36   7 6568.32 625.388   6
  -6  36   8 953.646 288.855   6
  -6  36   9 1067.68 283.992   6
  -6  36  10 499.615 220.025   6
  -6  36  11 726.629 244.265   6
  -6  36  12 1.75841 128.033   6
  -6  36  13 2038.12 307.154   6
  -6  38   0 42641.7 1529.01   6
   6  38   0 40723.7 1440.27   4
  -6  38   1 2438.74 427.040   6
  -6  38  -1 2170.26 377.665   6
   6  38  -1 2925.82 396.482   4
   6  38   1 2212.61 339.708   4
  -6  38   2 1826.62 332.396   6
   6  38   2 2274.34 357.777   4
   6  38  -2 1856.27 328.619   4
  -6  38   3 1089.45 272.233   6
   6  38  -3 1464.40 273.409   4
  -6  38   4 9947.50 736.542   6
   6  38  -4 9816.50 685.443   4
   6  38  -5 13420.4 783.637   4
  -6  38   5 12261.6 817.213   6
   6  38  -6 4926.32 453.963   4
  -6  38   6 4855.78 526.790   6
  -6  38   7 2250.07 362.081   6
  -6  38   8 198.603 209.337   6
  -6  38   9 3761.74 457.218   6
  -6  38  10 1353.23 298.108   6
  -6  38  11 3778.84 434.451   6
  -6  38  12 82.4073 122.576   6
  -6  40   0 33143.2 1310.33   6
   6  40   0 32153.1 1274.67   4
  -6  40   1 2829.21 407.348   6
   6  40  -1 3678.68 443.201   4
  -6  40  -1 3424.96 460.258   6
  -6  40   2 7085.98 611.215   6
   6  40  -2 7312.51 606.715   4
  -6  40  -2 7488.96 638.806   6
  -6  40   3 373.430 172.670   6
   6  40  -3 397.637 153.304   4
   6  40  -4 3451.95 404.578   4
  -6  40   4 3236.74 426.356   6
  -6  40   5 1974.00 335.316   6
   6  40  -5 2023.42 317.351   4
  -6  40   6 1432.18 312.187   6
  -6  40   7 264.988 166.812   6
  -6  40   8 2310.70 348.148   6
  -6  40   9 14379.9 814.121   6
  -6  40  10 2141.20 310.543   6
  -6  40  11 6917.34 512.006   6
  -6  42   0 26512.9 1131.84   6
  -6  42   1 3774.87 442.890   6
  -6  42  -1 4498.73 488.083   6
  -6  42   2 10657.2 707.861   6
  -6  42  -2 10774.6 733.167   6
  -6  42   3 167.166 134.284   6
  -6  42  -3 368.668 180.090   6
   6  42  -3 327.845 135.931   4
  -6  42   4 1982.43 301.388   6
   6  42  -4 1356.17 244.815   4
  -6  42  -4 1967.19 340.147   6
  -6  42   5 369.766 165.096   6
  -6  42   6 476.122 182.260   6
  -6  42   7 1524.79 291.137   6
  -6  42   8 3280.67 426.272   6
  -6  42   9 19915.4 879.185   6
  -6  42  10 3037.79 326.603   6
  -6  44   0 34528.5 1210.60   6
  -6  44   1 3845.44 420.098   6
  -6  44  -1 4876.66 477.494   6
  -6  44  -2 8967.79 635.795   6
  -6  44   2 8957.78 601.784   6
  -6  44  -3 463.756 159.109   6
  -6  44   3 280.950 111.714   6
  -6  44  -4-28.8111 102.472   6
  -6  44   4 187.449 140.700   6
  -6  44   5 994.164 204.181   6
  -6  44  -5 866.429 203.425   6
  -6  44   6 5.56906 108.269   6
  -6  44  -6 369.889 162.621   6
  -6  44  -7 1002.19 204.676   6
  -6  44   7 945.553 189.752   6
  -6  44   8 1606.80 231.308   6
  -6  46   0 21948.9 887.058   6
  -6  46   1 2209.59 301.306   6
  -6  46  -1 2564.02 315.498   6
  -6  46  -2 2027.01 269.182   6
  -6  46   2 2168.13 282.956   6
  -6  46  -3 97.7650 84.5913   6
  -6  46   3 179.328 111.741   6
  -6  46   4 857.892 194.867   6
  -6  46  -4 611.183 188.353   6
  -6  46  -5 1033.88 202.687   6
  -6  46   5 831.706 179.327   6
  -6  46   6 1923.40 257.961   6
  -6  46  -6 1887.97 256.263   6
  -6  48   0 8447.62 512.054   6
  -6  48   1 311.531 98.7797   6
  -6  48  -1 628.401 187.480   6
  -6  48   2 658.110 155.381   6
  -6  48  -2 340.128 138.524   6
   7   1   0 6.14762 43.0388   1
   7  -1   0 12.1227 43.7970   1
   7   1   1 44349.4 549.308   1
   7  -1  -1 44677.7 663.713   1
   7  -1   1 43251.7 539.092   1
   7   1  -1 44020.6 659.781   1
   7  -1  -2 2903.44 187.295   1
   7  -1   2 3039.40 124.642   1
   7   1   2 2703.22 115.578   1
   7   1  -2 3026.18 191.766   1
   7  -1  -3 24170.2 553.211   1
   7   1  -3 23759.8 546.954   1
   7  -1  -4 17677.5 502.056   1
   7   1  -4 17893.0 506.810   1
   7  -1  -5 52592.0 914.176   1
   7   1  -5 53533.8 925.772   1
   7  -1  -6 61406.9 1036.41   1
   7   1  -6 61121.9 1055.50   1
   7   1  -7 24441.8 725.214   1
   7  -1  -7 25652.2 718.468   1
   7  -1  -8 10590.2 499.117   1
   7  -1   8 10333.6 626.824   2
   7   1   8 9661.67 636.044   2
   7   1  -8 10668.8 504.059   1
   7   1  -9 576.044 132.588   1
   7  -1  -9 679.130 155.393   1
   7  -1   9 611.954 190.499   2
   7   1   9 685.788 185.288   2
   7  -1 -10 8392.13 498.771   1
   7  -1  10 8458.06 609.449   2
   7   1  10 8349.08 605.016   2
   7   1 -10 8320.11 502.997   1
   7   1 -11 275.043 134.416   1
   7  -1  11-118.371 144.661   2
   7  -1 -11 313.833 131.460   1
   7   1  11 9.02756 144.772   2
  -7   1  11-76.9922 100.426   6
   7  -1  12 421.010 200.815   2
   7   1  12-4.84994 174.844   2
   7   1 -12 203.725 144.512   1
   7  -1 -12 34.5122 90.3940   1
  -7   1  12 74.3439 132.239   6
   7  -1  13 88.9402 170.955   2
   7   1  13 142.325 165.098   2
   7   1 -13 337.208 172.217   1
   7  -1 -13 220.669 161.264   1
   7  -1  14 14571.0 944.872   2
   7   1  14 14344.2 936.102   2
   7   1 -14 10862.8 765.585   1
   7  -1 -14 10399.5 767.579   1
   7  -1  15 7649.42 703.583   2
   7   1  15 7113.72 676.362   2
   7  -1  16 16140.4 1032.44   2
   7   1  16 15987.1 1003.89   2
   7  -1  17 5818.69 593.539   2
   7   1  17 5716.08 615.362   2
  -7  -1  17 5834.79 547.048   2
  -7   1  17 6125.60 557.100   2
   7   1  18 680.642 330.734   2
   7  -1  18 261.691 173.089   2
  -7  -1  18 328.814 155.096   2
  -7   1  18 413.925 223.299   2
   7  -1  19-133.640 139.584   2
   7   1  19 306.949 187.975   2
  -7   1  19 115.384 128.508   2
   7  -1  20 48.3021 108.955   2
   7   1  20 129.002 121.235   2
   7  -3   0 1255.46 111.763   1
   7   3   0 1380.04 120.703   1
   7  -3  -1 9676.69 304.913   1
   7  -3   1 10148.1 272.224   1
   7   3  -1 9457.28 319.122   1
   7   3   1 8831.28 260.080   1
   7  -3  -2 3391.12 199.045   1
   7   3   2 3182.54 130.050   1
   7  -3   2 3463.67 143.397   1
   7   3  -2 3515.64 211.325   1
   7  -3   3 3375.65 138.318   1
   7   3  -3 4676.03 247.799   1
   7  -3  -3 5105.59 253.667   1
   7  -3  -4 7711.74 328.373   1
   7   3  -4 8876.78 360.346   1
   7  -3  -5 32444.0 713.599   1
   7   3  -5 32901.1 731.679   1
   7  -3  -6 19797.6 586.948   1
   7   3  -6 18922.9 595.822   1
   7  -3  -7 2202.05 209.703   1
   7   3  -7 2163.07 221.896   1
   7   3  -8 1152.59 173.683   1
   7  -3   8 1346.10 257.613   2
   7  -3  -8 1062.33 165.868   1
   7   3   8 1086.22 211.811   2
   7   3  -9 234.311 112.060   1
  -7   3   9 191.284 130.751   6
   7  -3   9 139.433 146.986   2
   7  -3  -9 79.0914 62.1448   1
   7   3   9 192.784 116.442   2
   7   3 -10 19386.2 780.440   1
   7  -3  10 18934.5 955.696   2
   7   3  10 17687.4 905.626   2
   7  -3 -10 18848.5 748.653   1
   7   3 -11 402.301 126.729   1
   7  -3  11 767.830 226.473   2
   7   3  11 354.648 148.988   2
   7  -3 -11 293.718 132.405   1
  -7   3  11 357.727 198.276   6
   7   3 -12 254.709 90.3014   1
   7  -3  12 377.806 218.656   2
  -7   3  12 454.034 174.822   6
   7   3  12 475.543 212.920   2
   7  -3 -12 454.631 170.220   1
  -7   3  13 1404.48 308.671   6
   7  -3  13 780.520 227.993   2
   7   3  13 836.230 284.900   2
   7   3 -13 1188.71 248.368   1
   7  -3 -13 913.330 234.077   1
   7  -3  14 11138.0 844.202   2
   7   3  14 11122.2 805.050   2
   7   3 -14 7744.06 646.608   1
   7  -3 -14 7084.70 630.070   1
   7  -3  15 8934.05 766.133   2
   7   3  15 8557.93 731.491   2
   7  -3  16 13747.4 948.232   2
   7   3  16 13239.0 902.922   2
  -7  -3  16 13278.3 823.359   2
   7  -3  17 1851.13 389.476   2
   7   3  17 1567.71 311.807   2
   7  -3  18 319.645 201.393   2
  -7   3  18 360.676 176.040   2
   7   3  18 156.450 193.349   2
   7  -3  19 1312.28 300.393   2
   7   3  19 1847.10 337.063   2
  -7   3  19 1188.19 230.855   2
   7  -3  20 94.9292 143.206   2
   7   3  20-1.18777 140.544   2
   7  -5   0 2166.63 145.653   1
   7  -5  -1 33379.8 586.879   1
   7  -5   1 32502.0 535.724   1
   7  -5  -2 3047.95 195.144   1
   7  -5   2 2679.71 152.822   1
   7  -5   3 582.537 77.4209   1
   7  -5  -3 713.314 107.173   1
   7   5   3 547.462 53.0869   1
   7   5  -4 621.278 117.682   1
   7  -5  -4 798.467 111.758   1
   7  -5  -5 2822.46 214.749   1
   7   5  -5 2511.96 211.066   1
   7   5  -6 12385.4 488.645   1
   7  -5  -6 11661.6 450.929   1
   7   5  -7 955.835 157.112   1
   7  -5  -7 813.614 132.892   1
   7  -5   8 14263.6 754.591   2
   7  -5  -8 13615.8 559.642   1
   7   5   8 13806.6 701.430   2
   7   5  -8 14041.5 593.256   1
   7   5  -9 6551.82 437.997   1
   7  -5   9 6357.16 548.570   2
   7  -5  -9 6650.19 419.645   1
   7   5   9 6819.04 512.655   2
  -7   5   9 5324.01 442.831   6
   7   5 -10 51572.0 1317.05   1
   7  -5 -10 51049.2 1236.28   1
   7   5  10 52592.6 1472.17   2
   7  -5  10 53960.1 1586.71   2
   7   5 -11 352.990 152.466   1
   7  -5  11-14.0791 167.459   2
   7   5  11 321.100 159.737   2
   7  -5 -11 337.802 144.851   1
  -7   5  11 568.865 229.240   6
   7   5 -12 7983.47 593.994   1
   7  -5  12 9123.75 723.308   2
   7   5  12 8037.84 640.115   2
   7  -5 -12 7884.41 566.974   1
  -7   5  12 8144.57 663.131   6
   7  -5  13 215.482 175.074   2
   7   5 -13 395.589 193.664   1
  -7   5  13 507.137 205.813   6
   7   5  13 318.387 204.090   2
   7  -5 -13 292.901 149.550   1
   7  -5  14 5242.54 562.984   2
   7   5 -14 4036.29 460.608   1
   7   5  14 5643.88 577.957   2
   7  -5 -14 3251.81 441.225   1
  -7   5  14 5407.75 569.486   6
   7   5  15 4957.21 562.458   2
   7  -5  15 5580.92 620.571   2
   7  -5  16 5328.52 612.073   2
   7   5  16 5181.90 575.014   2
   7  -5  17-204.334 202.251   2
   7   5  17 52.5455 183.075   2
   7  -5  18 567.875 230.281   2
  -7   5  18 616.855 190.578   2
   7   5  18 520.337 230.012   2
   7  -5  19 6946.80 618.201   2
   7   5  19 7602.48 604.388   2
  -7   5  19 7084.19 546.963   2
   7   5  20 760.511 271.764   2
   7  -7   0 3396.61 202.683   1
   7  -7   1 75785.7 905.360   1
   7  -7  -1 78456.2 949.244   1
   7  -7   2 242.772 70.2930   1
   7  -7  -2 254.861 66.3276   1
   7  -7   3-16.9177 54.5658   1
   7  -7  -3 15.9793 46.1150   1
   7  -7  -4 2029.00 175.072   1
   7  -7  -5 361.346 103.675   1
   7   7  -6 651.758 134.887   1
   7  -7  -6 658.320 115.759   1
   7   7  -7 166.639 92.7998   1
   7  -7  -7 186.765 88.6348   1
   7  -7   8 58255.4 1535.81   2
   7   7   8 55026.1 1379.85   2
   7  -7  -8 53983.4 1114.28   1
   7   7  -8 56128.4 1209.48   1
   7  -7  -9 9650.67 510.836   1
   7  -7   9 9963.44 677.743   2
   7   7   9 9405.61 606.272   2
   7   7   9 8636.09 624.076   6
  -7   7   9 8660.84 596.440   6
   7   7  -9 11022.0 576.350   1
   7   7  10 63539.2 1613.92   2
   7  -7 -10 59786.5 1379.15   1
   7   7  10 62973.7 1729.44   6
  -7   7  10 61772.2 1666.49   6
   7  -7  10 65553.0 1773.07   2
   7   7 -10 62687.6 1460.24   1
   7   7 -11 289.710 120.039   1
   7  -7  11 402.897 222.279   2
   7  -7 -11 196.914 118.488   1
   7   7  11 499.764 198.915   2
  -7   7  11 262.233 184.919   6
   7  -7  12 14877.9 941.457   2
   7   7  12 13304.5 827.212   2
  -7   7  12 13739.1 849.582   6
   7  -7 -12 13058.9 732.700   1
   7   7 -12 12640.0 759.354   1
   7  -7 -13 145.160 112.964   1
  -7   7  13 255.374 145.872   6
   7  -7  13 461.390 250.582   2
   7   7 -13 20.4201 318.029   1
   7   7  13 383.360 145.386   2
   7   7 -14 5485.54 529.024   1
   7  -7  14 8306.89 736.684   2
   7   7  14 7430.51 694.810   2
   7  -7 -14 5556.49 584.664   1
  -7   7  14 7998.97 718.656   6
   7  -7  15 1705.95 381.154   2
   7   7  15 1397.55 339.978   2
   7  -7  16-54.6030 161.887   2
   7   7  16 14.2103 164.566   2
   7  -7  17 572.739 250.800   2
   7   7  17 798.432 278.629   2
   7  -7  18 3394.48 530.910   2
  -7   7  18 3155.43 397.146   2
   7   7  18 3474.52 447.711   2
   7  -7  19 8871.47 694.732   2
  -7   7  19 10272.8 662.155   2
   7   7  19 10566.7 708.485   2
   7   7  20 975.813 215.277   2
   7  -9   0 1385.63 156.226   1
   7  -9   1 160255. 1484.76   1
   7  -9  -1 160751. 1461.00   1
   7  -9   2 1842.95 168.492   1
   7  -9  -2 1747.23 164.265   1
   7  -9  -3 1875.63 170.002   1
   7  -9   3 1839.90 169.535   1
   7  -9  -4 71.1758 58.3954   1
   7  -9  -5 3433.48 262.970   1
   7  -9  -6 9077.70 416.333   1
   7   9  -7 4565.63 344.817   1
   7  -9   7 3599.92 400.167   2
   7  -9  -7 4710.58 317.878   1
   7  -9   8 26991.7 1043.38   2
   7   9   8 27053.3 977.785   2
   7  -9  -8 25951.5 805.575   1
   7   9  -8 28931.6 891.875   1
   7  -9   9 8491.69 626.364   2
   7   9   9 8118.78 612.108   6
   7   9   9 9262.81 597.520   2
   7  -9  -9 8488.58 490.413   1
  -7   9   9 8475.03 602.926   6
   7   9  -9 8763.25 528.146   1
   7  -9  10 98340.4 2222.96   2
   7   9  10 92013.8 1963.65   2
   7  -9 -10 91617.5 1678.26   1
   7   9  10 93622.6 2133.80   6
  -7   9  10 95807.4 2110.64   6
   7   9 -10 93670.0 1817.28   1
   7  -9 -11 571.087 164.222   1
   7   9 -11 471.227 168.170   1
   7  -9  11 436.576 242.095   2
   7   9  11 614.914 217.029   2
   7   9  11 507.526 213.306   6
   7   9  12 20554.7 1039.39   2
   7  -9  12 22382.2 1185.22   2
   7   9 -12 20864.4 976.283   1
   7  -9 -12 20888.6 937.569   1
  -7   9  12 22907.2 1113.02   6
   7   9 -12 22050.1 1095.63   3
   7  -9 -13 337.145 210.615   1
   7  -9  13 446.388 260.818   2
   7   9 -13 250.451 147.935   1
   7   9  13 89.3569 182.808   2
  -7   9  13 96.7054 188.496   6
   7  -9  14 372.616 246.686   2
   7   9  14 402.369 176.030   2
  -7   9  14 727.356 213.843   6
   7  -9  15 776.664 297.441   2
   7   9  15 584.886 280.363   2
  -7   9  15 998.622 322.661   6
   7  -9  16 599.151 277.201   2
   7   9  16 876.996 283.798   2
   7  -9  17 1548.06 346.999   2
   7   9  17 1424.84 304.539   2
   7  -9  18 2698.57 431.399   2
   7   9  18 2560.22 379.754   2
  -7   9  18 3044.04 396.203   2
   7   9  19 12327.0 758.336   2
  -7   9  19 12321.4 706.317   2
   7 -11   0 894.534 142.441   1
   7 -11   1 176003. 1701.10   1
   7 -11  -1 175428. 1646.82   1
   7 -11   2 3783.24 269.220   1
   7 -11  -2 3938.89 255.647   1
   7 -11  -3 177.008 83.3504   1
   7 -11   3 74.0202 65.9414   1
   7 -11  -4 4512.15 283.065   1
   7 -11  -5 54704.6 1000.41   1
   7 -11  -6 27588.9 736.588   1
   7 -11  -7 1010.87 155.786   1
   7 -11   7 782.283 230.006   2
   7  11  -7 989.979 190.457   3
   7 -11  -8 13694.5 582.459   1
   7 -11   8 12339.9 775.317   2
   7  11   8 10827.2 658.669   6
   7  11  -8 15193.9 665.000   1
  -7  11   8 13894.7 750.340   6
   7  11  -8 12820.9 681.255   3
   7  11   8 13591.5 688.542   2
   7  11   9 6117.55 496.115   2
   7  11  -9 5841.21 496.989   3
   7 -11   9 5882.71 561.228   2
   7 -11  -9 6138.67 423.693   1
  -7  11   9 6468.16 552.473   6
   7  11  -9 6509.03 457.894   1
   7  11   9 5249.99 528.515   6
   7 -11  10 71117.3 1933.55   2
  -7  11  10 76235.4 1935.45   6
   7  11  10 70225.1 1692.08   2
   7 -11 -10 69207.6 1497.28   1
   7  11  10 70946.4 1854.76   6
   7  11 -10 71019.2 1764.85   3
   7  11 -10 72635.7 1616.45   1
   7  11 -11 1287.05 272.041   3
   7 -11 -11 960.361 203.831   1
   7  11 -11 820.548 200.745   1
   7 -11  11 1280.20 316.242   2
   7  11  11 1236.68 318.397   6
  -7  11  11 1508.15 293.036   6
   7  11  11 1046.42 254.355   2
   7  11 -12 2389.95 345.072   3
   7  11 -12 2163.96 328.309   1
   7 -11  12 2190.25 385.799   2
   7  11  12 2550.78 366.281   2
   7 -11 -12 2038.51 323.015   1
   7  11  12 2666.49 410.759   6
  -7  11  12 2654.10 397.766   6
   7 -11 -13 795.224 257.970   1
   7 -11  13 958.429 311.086   2
   7  11 -13 931.811 232.444   1
   7  11  13 1200.79 327.185   2
  -7  11  13 1575.91 334.849   6
  -7  11  14 340.168 192.905   6
   7 -11  14 733.181 303.546   2
   7  11  14 221.724 168.372   2
  -7  11  15 171.563 157.740   6
   7 -11  15-153.677 208.111   2
   7  11  15 62.8433 134.231   2
   7 -11  16 407.501 206.590   2
   7  11  16 735.657 276.612   2
   7 -11  17-75.4781 200.075   2
   7  11  17-141.091 152.369   2
   7  11  18 1502.21 310.531   2
  -7  11  18 1261.21 269.641   2
  -7  11  19 3609.44 399.344   2
   7  11  19 3832.98 423.611   2
   7 -13   0 786.999 155.232   1
   7 -13   1 72730.3 1219.07   1
   7 -13  -1 73220.9 1161.19   1
   7 -13   2 2382.72 237.198   1
   7 -13  -2 2377.53 213.544   1
   7 -13   3 15421.3 603.277   1
   7 -13  -3 15619.3 531.881   1
   7 -13  -4 49936.2 980.385   1
   7 -13  -5 42711.4 924.329   1
   7 -13  -6 27636.3 778.002   1
   7  13  -6 26963.0 914.435   3
   7  13   7 3704.83 360.383   2
   7 -13   7 3479.33 410.314   2
   7 -13  -7 4479.00 336.785   1
   7  13  -7 3950.63 372.962   3
  -7  13   7 3952.19 393.160   6
  -7  13   8 1194.16 234.028   6
   7  13  -8 1220.09 231.762   3
   7 -13  -8 1167.84 187.444   1
   7 -13   8 1089.69 278.131   2
   7  13   8 847.468 204.800   6
   7  13   8 1083.26 211.459   2
   7  13  -9 1492.36 263.133   3
   7  13  -9 1555.15 257.074   1
   7 -13  -9 1475.71 215.971   1
   7 -13   9 1174.91 289.327   2
   7  13   9 1097.96 284.196   6
   7  13   9 1526.49 256.265   2
  -7  13   9 1498.71 292.560   6
   7 -13  10 23340.2 1147.60   2
   7  13 -10 23912.8 1018.47   3
   7  13  10 24112.7 1000.54   2
   7 -13 -10 22866.5 886.312   1
   7  13  10 23194.5 1064.21   6
  -7  13  10 24244.1 1117.07   6
   7  13 -10 22964.2 930.373   1
   7  13 -11 311.573 148.423   3
   7  13 -11 336.553 150.612   1
   7 -13 -11 271.956 158.665   1
   7 -13  11 379.822 245.812   2
   7  13  11 294.662 169.693   2
   7  13  11 133.078 150.014   6
  -7  13  11 443.102 187.496   6
   7 -13  12 2676.19 463.546   2
   7  13  12 3451.17 428.166   2
   7  13  12 3428.98 463.235   6
  -7  13  12 3420.73 480.802   6
   7  13 -12 2871.00 356.047   1
   7  13 -13 173.128 109.263   1
   7 -13  13 500.531 273.642   2
   7 -13 -13 259.968 137.323   1
   7  13  13 243.995 123.198   2
  -7  13  13 280.105 159.258   6
   7 -13  14 4312.95 587.513   2
   7  13  14 4846.07 540.105   2
  -7  13  14 5260.04 585.286   6
   7 -13  15 4545.55 583.780   2
   7  13  15 4424.56 508.767   2
  -7  13  15 4373.04 546.194   6
   7  13  16 3469.06 457.349   2
   7 -13  16 2749.43 466.821   2
  -7  13  16 3699.91 473.517   6
   7  13  17 174.492 164.157   2
  -7  13  18 42.6842 111.475   2
   7  13  18-51.6646 130.242   2
   7  13  19 1506.65 249.640   2
  -7  13  19 1531.55 264.472   2
   7 -15   0 399.542 132.475   1
   7 -15  -1 46659.6 1029.94   1
   7 -15   1 46637.9 1096.35   1
   7 -15   2 1498.51 215.142   1
   7 -15  -2 1511.98 186.033   1
   7 -15   3 112631. 1776.10   1
   7 -15  -3 102188. 1482.43   1
   7 -15  -4 15938.9 588.435   1
   7  15  -5 57053.6 1288.48   3
   7 -15  -5 54089.6 1101.48   1
  -7  15   6 40031.3 1233.05   6
   7 -15  -6 42721.4 1005.71   1
   7  15  -6 42141.6 1159.98   3
   7  15   7 10833.3 619.701   2
   7  15   7 9887.04 610.313   4
   7 -15  -7 11796.6 561.841   1
   7  15  -7 12193.7 640.685   3
  -7  15   7 12555.1 713.979   6
   7  15  -8 918.608 210.179   3
   7  15   8 842.858 225.608   6
  -7  15   8 1134.60 287.122   6
   7 -15  -8 805.571 175.282   1
   7  15   8 928.146 223.847   2
   7 -15   8 1142.36 263.246   2
   7  15  -9 1208.52 239.837   3
   7 -15   9 1082.56 270.317   2
   7  15   9 884.086 214.430   6
   7 -15  -9 1204.98 192.318   1
   7  15   9 1326.47 254.483   2
   7  15  -9 1984.59 300.590   1
  -7  15   9 1236.29 257.613   6
   7 -15  10 5729.11 588.857   2
   7  15  10 5437.62 498.673   2
   7  15 -10 5589.88 492.687   3
   7  15  10 6088.51 549.515   6
   7 -15 -10 5852.67 481.940   1
  -7  15  10 6139.25 569.502   6
   7  15 -10 5972.61 477.670   1
   7 -15  11-313.720 272.813   2
   7 -15 -11-170.832 123.356   1
   7  15  11-87.8803 164.427   2
   7  15 -11 108.819 145.607   1
   7  15 -11-14.8225 104.724   3
   7  15  11 19.1790 127.787   6
  -7  15  11 111.034 191.119   6
   7  15 -12 911.222 221.723   1
  -7  15  12 1286.92 291.167   6
   7 -15  12 1196.28 331.555   2
   7 -15 -12 825.290 232.919   1
   7  15  12 913.716 233.513   2
   7  15  12 865.248 226.900   6
   7 -15  13 281.161 177.779   2
   7  15  13 751.239 252.454   2
  -7  15  13 535.227 213.388   6
   7  15  13 336.245 218.019   6
   7  15  14 25205.7 1156.93   2
   7 -15  14 22139.5 1244.30   2
  -7  15  14 24478.5 1237.78   6
   7 -15  15 7952.88 728.961   2
   7  15  15 8563.28 706.482   2
  -7  15  15 8282.38 717.048   6
   7  15  16 12198.6 819.047   2
  -7  15  16 11156.3 808.265   6
   7  15  17 2849.53 390.595   2
   7  15  18 100.270 148.496   2
  -7  15  18 132.948 141.053   2
   7  15  19 59.4983 108.131   2
  -7  15  19 265.722 133.120   2
   7 -17   0 272.388 120.807   1
   7 -17  -1 117.265 104.765   1
   7 -17   1 22.3438 80.4375   1
   7 -17   2 4636.53 396.691   1
   7 -17  -2 4639.36 349.623   1
   7 -17  -3 38129.3 990.626   1
   7  17  -3 35942.4 984.485   3
  -7  17   4 24034.7 950.976   6
   7  17   4 21994.2 844.388   4
   7  17  -4 24669.6 853.814   3
   7 -17  -4 24988.4 794.738   1
  -7  17   5 49996.2 1387.26   6
   7  17   5 47292.1 1304.65   4
   7  17  -5 50414.2 1246.79   3
   7 -17  -5 49766.9 1129.53   1
   7 -17  -6 49713.5 1161.69   1
   7  17  -6 51833.5 1310.95   3
  -7  17   6 51275.7 1416.29   6
   7  17   7 10639.8 659.685   4
   7  17  -7 12010.8 654.095   3
   7 -17  -7 12480.9 604.471   1
  -7  17   7 13120.6 745.825   6
  -7  17   8 648.209 215.531   6
   7 -17  -8 486.424 140.936   1
   7  17   8 498.337 170.790   2
   7  17   8 335.045 154.005   6
   7  17  -8 538.516 148.007   3
  -7  17   9 231.074 150.532   6
   7  17  -9 319.004 133.257   3
   7 -17  -9 206.705 120.127   1
   7  17   9 383.462 154.405   2
   7  17   9 417.549 200.751   6
   7 -17 -10 3538.12 382.651   1
   7  17  10 3863.72 413.296   2
  -7  17  10 3713.48 449.120   6
   7  17  10 3587.85 427.104   6
   7  17 -10 3264.22 363.617   1
   7  17 -10 3821.55 406.142   3
   7  17  11 49.6102 150.098   6
   7  17 -11 83.1838 86.9081   1
   7  17  11 2.63743 122.639   2
   7 -17 -11-84.8894 94.3762   1
  -7  17  11 22.2319 142.142   6
   7 -17 -12 3741.44 453.640   1
   7  17  12 4428.51 507.583   2
   7  17  12 4459.21 515.955   6
  -7  17  12 5122.39 562.176   6
   7  17 -12 3628.87 420.634   1
   7  17  13 3428.03 443.415   2
   7  17  13 3176.16 459.664   6
  -7  17  13 3174.01 478.161   6
   7  17  14 28257.3 1229.93   2
  -7  17  14 27323.7 1293.83   6
  -7  17  15 12538.3 867.997   6
   7  17  15 13487.3 861.273   2
   7  17  16 18731.3 989.976   2
  -7  17  16 18120.3 1025.21   6
   7  17  17 4775.19 489.878   2
   7  17  18 303.774 131.808   2
  -7  17  18 260.849 165.756   2
   7 -19   0 1102.51 235.853   1
   7 -19   1 77.1678 94.5209   1
   7 -19  -1 12.5380 90.7369   1
   7 -19   2 167.643 119.842   1
   7 -19  -2 136.594 104.277   1
  -7  19   3 22032.1 983.129   6
   7 -19  -3 21666.7 803.906   1
   7 -19   3 19841.3 919.783   1
  -7  19   4 19020.7 898.875   6
   7 -19  -4 18025.0 729.428   1
   7  19   4 18521.6 798.014   4
   7  19  -5 50204.3 1287.24   3
   7 -19  -5 47677.4 1200.45   1
   7  19   5 49438.4 1375.22   4
  -7  19   5 52028.8 1473.59   6
  -7  19   6 43869.1 1363.29   6
   7 -19  -6 41700.2 1142.77   1
   7  19   6 41849.6 1299.93   4
  -7  19   7 12928.5 769.038   6
   7 -19  -7 12306.2 635.435   1
   7  19   7 12579.6 744.238   4
   7  19  -7 13088.6 707.260   3
  -7  19   8 1067.79 256.255   6
   7 -19  -8 911.665 193.789   1
   7  19  -8 868.347 209.064   3
  -7  19   9 248.744 153.802   6
   7  19   9 189.377 139.439   2
   7 -19  -9 88.4529 80.7440   1
   7  19   9 145.783 101.727   6
   7  19  -9 505.299 184.558   3
   7 -19 -10 5531.08 497.525   1
   7  19 -10 6506.06 527.462   3
  -7  19  10 6786.69 614.435   6
   7  19  10 5631.56 516.889   2
   7  19  10 5497.92 517.759   6
   7  19 -10 4815.76 457.241   1
   7  19 -11-160.612 142.454   1
   7  19  11-35.8777 133.882   2
   7 -19 -11 44.9695 167.051   1
   7  19  11-2.56522 127.411   6
  -7  19  11-32.1341 184.120   6
   7  19  12 4517.26 508.708   2
   7  19  12 4238.74 498.545   6
  -7  19  12 4528.68 526.270   6
   7  19  13 1169.87 292.849   2
   7  19  13 1086.84 276.029   6
  -7  19  13 1829.81 370.492   6
   7  19  14 27868.8 1213.97   2
  -7  19  14 26288.9 1277.72   6
   7  19  15 12576.6 843.506   2
  -7  19  15 12040.3 851.497   6
   7  19  16 16753.4 922.929   2
  -7  19  16 16326.4 954.105   6
   7  19  17 4376.86 483.501   2
   7  19  18-43.5569 99.3127   2
  -7  19  18-52.4098 125.116   2
   7 -21   0 345.880 146.215   1
   7 -21   1 22831.9 974.710   1
   7 -21  -1 23654.8 965.744   1
   7 -21   2 311.352 162.228   1
   7 -21  -2 118.522 88.2431   5
   7 -21  -2 241.826 127.785   1
  -7  21   3 12839.3 774.142   6
   7 -21   3 11269.0 734.740   1
   7 -21  -3 11106.3 625.066   1
   7  21   3 11207.2 616.318   4
  -7  21   4 14801.1 827.017   6
   7 -21  -4 14511.1 703.569   1
   7  21   4 14422.3 727.468   4
  -7  21   5 39595.5 1354.56   6
   7 -21  -5 38063.0 1143.74   1
   7  21   5 42099.8 1300.48   4
  -7  21   6 20489.4 1004.94   6
   7 -21  -6 20345.1 858.033   1
   7  21   6 21205.4 950.200   4
   7 -21  -7 5533.68 453.795   1
  -7  21   7 6453.01 569.109   6
   7  21   7 5706.86 524.558   4
  -7  21   8 1976.10 320.417   6
   7 -21  -8 1981.04 298.783   1
  -7  21   9 1068.78 276.879   6
   7 -21  -9 913.697 220.848   1
   7  21   9 917.468 234.649   6
   7 -21 -10 17267.5 929.136   1
   7  21  10 17574.6 944.909   6
   7  21  11-60.1581 183.442   6
   7  21 -11 34.1624 101.758   1
  -7  21  11 335.186 280.444   6
   7  21  11 290.385 166.234   2
   7 -21 -11 12.0822 102.710   1
   7  21  12 1329.64 299.635   2
   7  21  12 1180.06 273.491   6
  -7  21  12 1368.83 317.946   6
   7  21  13 354.764 180.232   2
  -7  21  13 54.7058 133.755   6
   7  21  13-111.791 134.957   6
   7  21  14 6362.80 595.605   2
  -7  21  14 6531.77 647.499   6
   7  21  15 5476.82 535.021   2
  -7  21  15 5986.76 595.624   6
  -7  21  16 6911.55 606.976   6
   7  21  16 7193.11 597.266   2
  -7  21  17 535.147 248.346   6
   7  21  17 1053.81 243.510   2
  -7  21  18 129.074 111.526   2
   7 -23   0 8992.87 671.673   1
   7 -23   1 60752.9 1730.29   1
   7 -23  -1 65157.3 1700.85   1
   7 -23  -2 953.466 179.563   5
   7 -23  -2 1225.78 241.739   1
   7  23   2 1373.93 223.593   4
   7 -23   2 1059.64 261.486   1
   7  23   3 110.475 75.2586   4
  -7  23   3 193.102 147.893   6
   7 -23  -3 169.473 83.7127   5
   7 -23  -3-20.8707 116.264   1
   7 -23   3 420.501 187.785   1
  -7  23   4 6262.80 581.605   6
   7 -23  -4 5569.64 476.288   1
   7  23   4 5528.72 475.548   4
  -7  23   5 11842.6 779.024   6
   7 -23  -5 10723.2 655.540   1
   7  23   5 11342.3 695.168   4
   7 -23  -6 12708.3 732.925   1
  -7  23   6 13397.6 839.567   6
   7  23   6 14456.8 811.033   4
   7 -23  -7 2865.48 362.151   1
  -7  23   7 3419.24 440.203   6
   7  23   7 3853.19 442.231   4
  -7  23   8 1241.67 272.538   6
   7 -23  -8 1242.66 261.480   1
  -7  23   9 974.125 268.080   6
   7 -23  -9 825.167 234.659   1
   7 -23 -10 34448.4 1384.02   1
   7  23  10 34894.5 1317.95   6
  -7  23  11 2041.11 387.644   6
   7  23  11 1399.35 288.630   6
   7  23  12 6062.08 575.164   6
  -7  23  12 6250.79 620.792   6
   7  23  13-19.6169 133.148   2
   7  23  13 120.871 127.803   6
  -7  23  13 310.648 234.759   6
   7  23  14 740.963 239.514   2
  -7  23  14 151.444 144.470   6
   7  23  15 4303.23 440.016   2
  -7  23  15 1800.18 329.225   6
   7  23  16 1290.21 259.322   2
  -7  23  16 1827.74 329.583   6
  -7  23  17 68.2830 141.800   6
   7 -25   0 7100.15 665.625   1
   7 -25   1 100755. 2489.76   1
   7 -25  -1 106412. 2336.61   1
   7 -25   2 2546.42 390.462   1
   7  25   2 2353.56 301.377   4
   7 -25  -2 2651.10 392.397   1
   7 -25  -3 337.217 150.486   1
   7 -25  -3 269.895 136.450   5
   7  25   3 244.243 96.3511   4
  -7  25   3 326.404 194.418   6
   7 -25  -4 384.052 154.997   1
   7 -25  -4 417.832 168.416   5
  -7  25   4 20.2608 141.423   6
   7  25   4 412.268 138.677   4
  -7  25   5 5620.69 565.141   6
   7 -25  -5 4846.28 472.897   1
   7  25   5 5367.77 488.055   4
  -7  25   6 6737.36 610.676   6
   7 -25  -6 5796.67 534.078   1
   7  25   6 7013.44 584.860   4
  -7  25   7 147.929 153.309   6
   7 -25  -7 21.7959 91.9529   1
   7 -25  -8 9286.16 708.349   1
  -7  25   8 10966.5 792.819   6
  -7  25   9 6339.07 634.125   6
   7 -25  -9 5591.74 583.736   1
  -7  25  10 47640.5 1721.09   6
  -7  25  11 2279.37 423.306   6
   7  25  11 1855.03 320.398   6
   7  25  12 17038.6 942.290   6
  -7  25  12 19572.0 1126.49   6
   7  25  13 579.305 215.398   6
  -7  25  13 313.678 185.726   6
  -7  25  14 52.3643 142.430   6
  -7  25  15 374.279 171.435   6
  -7  25  16 93.1559 129.629   6
  -7  25  17 13945.6 734.908   6
  -7  25  17 225.015 122.052   2
   7 -27   0 6988.52 674.474   1
   7 -27  -1 56822.9 1842.02   1
   7  27   1 54012.6 1422.63   4
   7 -27   1 53329.0 1945.46   1
  -7  27   2 3695.98 480.119   6
   7 -27   2 4209.36 557.620   1
   7  27   2 3213.56 366.309   4
   7 -27  -2 3501.07 452.672   1
  -7  27   3 746.256 246.568   6
   7  27   3 348.107 140.887   4
   7 -27  -3 366.985 150.830   1
  -7  27   4 206.101 177.821   6
   7 -27  -4 486.362 209.078   1
   7  27   4 467.681 173.293   4
   7 -27  -5 1520.86 256.960   5
   7 -27  -5 1463.28 288.500   1
   7  27   5 1739.21 288.458   4
  -7  27   5 1642.87 321.152   6
   7 -27  -6 1668.71 325.472   1
  -7  27   6 1665.03 338.383   6
   7  27   6 1791.85 324.504   4
   7 -27  -7 309.655 176.424   1
  -7  27   7 318.284 201.555   6
   7 -27  -8 14317.1 916.556   1
  -7  27   8 18642.3 1082.29   6
  -7  27   9 9079.36 782.577   6
  -7  27  10 33260.0 1465.83   6
  -7  27  11 750.201 255.492   6
  -7  27  12 15296.9 986.994   6
  -7  27  13 196.908 168.022   6
  -7  27  14 4.46527 150.073   6
  -7  27  15 313.141 172.865   6
  -7  27  16 18.4908 130.644   6
   7 -29   0 3277.13 552.221   1
   7  29   0 3093.42 370.933   4
   7 -29   1 26577.7 1413.32   1
   7 -29  -1 28420.1 1397.91   1
   7  29   1 26261.6 1043.88   4
   7  29  -1 25539.4 1012.87   4
   7 -29  -2 412.038 229.212   1
  -7  29   2 821.403 295.055   6
   7  29   2 677.362 206.719   4
  -7  29   3 232.628 207.635   6
   7  29   3-38.1812 128.018   4
   7 -29  -3-5.08423 197.493   1
  -7  29   4 1544.47 330.361   6
   7  29   4 1195.49 248.440   4
   7 -29  -4 1119.12 288.499   1
  -7  29   5 4567.04 540.428   6
   7  29   5 3867.99 438.913   4
   7 -29  -5 4570.07 522.906   1
  -7  29   6 2026.66 359.711   6
   7 -29  -6 1467.31 316.589   1
   7 -29  -6 1580.88 273.409   5
   7  29   6 1745.10 323.832   4
  -7  29   7-24.0724 152.475   6
   7 -29  -7 45.2723 184.447   1
  -7  29   8 13961.2 933.388   6
  -7  29   9 3040.00 480.546   6
  -7  29  10 28901.4 1357.21   6
  -7  29  11 1450.68 335.965   6
  -7  29  12 336.441 200.276   6
  -7  29  13 592.755 233.908   6
  -7  29  14 1163.76 261.336   6
   7 -29 -15 1023.27 182.032   5
  -7  29  15 1206.99 272.172   6
   7 -31   0 2340.66 439.956   1
   7  31   0 2315.08 334.328   4
   7 -31  -1 2357.10 472.299   1
   7  31   1 2295.26 325.928   4
   7  31  -1 2233.25 328.514   4
  -7  31   2 809.272 244.873   6
   7 -31  -2 360.102 258.001   1
   7  31   2 706.571 192.498   4
   7  31  -2 651.217 170.902   4
  -7  31   3 4166.83 503.181   6
   7 -31  -3 3317.76 508.537   1
   7  31   3 3681.89 412.156   4
   7  31  -3 3564.05 404.774   4
  -7  31   4 7234.98 671.333   6
   7 -31  -4 5887.40 639.027   1
   7  31   4 6332.08 556.743   4
  -7  31   5 15566.6 976.008   6
   7  31   5 13883.8 852.547   4
  -7  31   6 7601.90 681.280   6
  -7  31   7 663.510 275.238   6
   7 -31  -8 198.871 181.171   5
  -7  31   8-188.974 178.537   6
  -7  31   9 972.916 276.882   6
   7 -31  -9 1034.71 221.143   5
   7 -31 -10 9575.78 624.781   5
  -7  31  10 11408.4 858.709   6
  -7  31  11 372.941 208.062   6
   7 -31 -12 57.9749 85.2718   5
  -7  31  12 184.898 202.182   6
   7 -31 -13 468.300 140.548   5
  -7  31  13 524.031 259.098   6
   7 -31 -14 3260.44 311.443   5
  -7  31  14 3927.67 440.293   6
  -7  31  15 2195.71 341.045   6
   7  33   0 131.044 119.769   4
   7 -33  -1 4369.54 631.516   1
  -7  33   1 5261.08 564.326   6
   7  33   1 5403.47 499.312   4
   7  33  -1 4929.70 475.439   4
   7 -33  -2 461.265 266.934   1
  -7  33   2 207.552 199.068   6
   7  33   2 302.371 120.182   4
   7  33  -2 206.647 146.215   4
   7  33   3 10944.5 723.058   4
   7  33  -3 11041.1 720.637   4
  -7  33   3 11915.5 842.089   6
  -7  33   4 10509.9 801.825   6
   7  33   4 10356.4 728.574   4
   7  33  -4 12079.6 758.857   4
  -7  33   5 23545.3 1185.31   6
   7  33   5 22870.2 1079.58   4
   7  33  -5 22716.3 1043.66   4
   7  33  -6 14604.2 849.491   4
  -7  33   6 13721.4 918.857   6
   7  33  -7 7749.08 605.582   4
  -7  33   7 9070.72 756.779   6
  -7  33   8 464.405 207.559   6
   7  33  -8 453.909 166.385   4
  -7  33   9 93.3632 195.718   6
  -7  33  10 1600.08 328.847   6
   7 -33 -11 226.095 106.042   5
  -7  33  11 258.298 157.304   6
   7 -33 -12 616.711 145.176   5
  -7  33  12 991.693 317.795   6
  -7  33  13 543.065 231.100   6
   7 -33 -13 435.573 138.217   5
  -7  33  14 7403.35 601.546   6
  -7  35   0 1274.64 327.042   6
   7  35   0 1355.07 277.718   4
   7  35  -1 2356.33 347.327   4
   7  35   1 2862.94 382.698   4
  -7  35   1 2493.20 387.336   6
  -7  35   2 381.899 234.889   6
   7  35   2 98.4749 113.401   4
   7  35  -2 122.897 128.636   4
  -7  35   3 14137.4 902.627   6
   7  35   3 12850.6 796.472   4
   7  35  -3 13810.1 815.542   4
  -7  35   4 10982.4 811.431   6
   7  35   4 10555.2 737.283   4
   7  35  -4 10920.1 738.057   4
  -7  35   5 22824.5 1154.28   6
   7  35  -5 22761.8 1046.92   4
   7  35  -6 29797.5 1185.97   4
  -7  35   6 30374.3 1344.10   6
   7  35  -7 5416.39 507.651   4
  -7  35   7 6653.41 644.509   6
  -7  35   8 2722.16 417.625   6
  -7  35   9-141.795 158.867   6
  -7  35  10 1772.77 440.840   6
  -7  35  11 75.6340 151.049   6
  -7  35  12 26.4882 106.839   6
  -7  35  13 585.782 185.155   6
  -7  37   0 2121.96 369.393   6
   7  37   0 2148.05 326.408   4
  -7  37   1 9437.46 734.255   6
  -7  37  -1 9523.43 753.169   6
   7  37   1 9276.67 672.482   4
   7  37  -1 9020.79 660.858   4
  -7  37   2 232.764 200.063   6
   7  37   2 533.581 206.068   4
   7  37  -2 112.284 103.840   4
  -7  37   3 5540.61 562.444   6
   7  37   3 6312.31 561.784   4
   7  37  -3 5800.10 529.353   4
  -7  37   4 5929.35 592.930   6
   7  37  -4 6687.35 572.262   4
   7  37  -5 19803.3 963.557   4
  -7  37   5 19783.2 1062.10   6
   7  37  -6 13212.4 771.915   4
  -7  37   6 11113.7 799.952   6
   7  37  -7 3381.66 375.133   4
  -7  37   7 3837.72 499.960   6
  -7  37   8 92.2521 129.375   6
  -7  37   9 114.081 129.251   6
  -7  37  10 2715.92 380.244   6
  -7  37  11 83.8117 132.123   6
  -7  37  12 129.631 133.514   6
  -7  39   0 2579.48 410.647   6
   7  39   0 2169.60 332.719   4
  -7  39   1 9525.71 726.045   6
  -7  39  -1 10398.4 750.648   6
   7  39   1 10248.8 716.021   4
   7  39  -1 10365.2 717.163   4
  -7  39  -2 251.469 176.160   6
  -7  39   2 301.831 151.920   6
   7  39   2 133.784 114.755   4
   7  39  -2 570.958 192.110   4
  -7  39   3 1535.05 289.254   6
   7  39  -3 2656.08 382.601   4
  -7  39   4 2011.09 338.314   6
   7  39  -4 2752.91 362.606   4
   7  39  -5 3784.25 412.966   4
  -7  39   5 3991.54 467.348   6
  -7  39   6 2542.14 370.454   6
   7  39  -6 2588.21 340.424   4
  -7  39   7-293.516 164.861   6
  -7  39   8 2781.67 421.670   6
  -7  39   9 1994.94 324.777   6
  -7  39  10 8235.24 596.824   6
  -7  39  11 692.462 195.609   6
  -7  41   0 2625.44 379.820   6
   7  41   0 2946.44 390.099   4
  -7  41   1 13874.2 845.492   6
  -7  41  -1 14525.1 861.147   6
   7  41  -1 13767.3 803.300   4
  -7  41   2 2118.59 342.716   6
  -7  41  -2 2253.00 355.497   6
   7  41  -2 1841.22 296.364   4
  -7  41   3 1184.29 289.107   6
  -7  41  -3 958.009 246.397   6
   7  41  -3 1202.53 262.108   4
  -7  41   4 122.772 126.771   6
   7  41  -4 319.032 133.525   4
  -7  41   5 552.677 209.113   6
   7  41  -5 446.682 154.506   4
  -7  41   6-16.0617 109.992   6
  -7  41   7 516.288 193.851   6
  -7  41   8 8278.12 594.499   6
  -7  41   9 3565.78 382.751   6
  -7  41  10 15461.8 744.163   6
  -7  43   0 3003.40 371.316   6
  -7  43   1 18219.4 885.391   6
  -7  43  -1 18052.8 904.004   6
  -7  43  -2 1142.49 225.904   6
  -7  43   2 1501.43 254.714   6
  -7  43   3 1540.03 285.667   6
  -7  43  -3 1006.31 228.452   6
  -7  43   4 54.2835 93.9824   6
  -7  43  -4 85.3439 124.461   6
  -7  43   5 424.765 162.373   6
  -7  43  -5 257.742 148.375   6
  -7  43   6 179.026 108.090   6
  -7  43   7 1018.95 204.225   6
  -7  43   8 7839.88 524.966   6
  -7  45   0 2897.66 347.888   6
  -7  45  -1 16131.9 788.103   6
  -7  45   1 15167.3 767.593   6
  -7  45   2 932.471 208.722   6
  -7  45  -2 1042.64 229.744   6
  -7  45   3 1145.86 220.961   6
  -7  45  -3 324.612 152.494   6
  -7  45   4 256.005 119.605   6
  -7  45  -4 346.226 164.259   6
  -7  45   5 738.144 192.388   6
  -7  45  -5 169.436 105.833   6
  -7  45  -6 452.563 168.426   6
  -7  45   6 391.476 132.149   6
  -7  45   7 301.959 111.239   6
  -7  47   0 1710.24 246.321   6
  -7  47  -1 9174.51 536.709   6
  -7  47   1 9007.36 538.065   6
  -7  47   2 210.476 107.370   6
  -7  47  -2 480.621 160.869   6
  -7  47   3 420.550 135.599   6
  -7  47  -3 194.348 85.7937   6
  -7  47   4 1130.15 187.060   6
   8   0   0 24148.5 488.180   1
   8   0  -1 814.939 112.981   1
   8   0   1 671.755 77.8898   1
   8   0   2 4568.91 165.919   1
   8   0  -2 5242.42 255.023   1
   8   0  -3 518.414 103.213   1
   8   0   3 113.224 21.8979   1
   8   0  -4 6483.96 322.785   1
   8   0  -5 37319.4 812.495   1
   8   0  -6 44019.2 925.349   1
   8   0  -7 46248.9 1011.33   1
   8   0   7 45078.9 1272.29   2
   8   0  -8 8666.49 470.029   1
   8   0   8 8765.61 603.929   2
   8   0  -9 520.014 135.434   1
   8   0   9 118.161 147.206   2
   8   0 -10-204.075 120.216   1
   8   0  10 54.2226 142.074   2
   8   0  11 138.515 155.773   2
   8   0 -11 313.336 131.009   1
   8   0  12 300.562 206.184   2
   8   0 -12-80.5107 85.7488   1
   8   0  13 7256.39 681.097   2
   8   0 -13 7022.92 590.565   1
   8   0  14 3714.83 495.083   2
   8   0  15 13454.4 941.258   2
   8   0  16 7331.29 699.020   2
   8   0  17 3236.14 469.942   2
  -8   0  17 3128.91 392.636   2
   8   0  18 172.117 161.676   2
  -8   0  18 262.512 171.888   2
   8   0  19 255.162 186.294   2
   8  -2   0 19677.8 439.496   1
   8   2   0 20000.0 448.870   1
   8   2  -1 281.457 71.9165   1
   8   2   1 258.979 63.4454   1
   8  -2  -1 169.603 77.7933   1
   8  -2   1 131.305 42.2782   1
   8  -2  -2 138.131 73.5443   1
   8  -2   2 99.0185 32.7566   1
   8   2   2 93.5785 35.2063   1
   8   2  -2 51.1548 55.0648   1
   8  -2  -3 1933.28 171.179   1
   8  -2   3 1283.03 77.6670   1
   8   2  -3 2112.82 181.544   1
   8  -2  -4 15397.4 494.073   1
   8   2  -4 14237.6 481.732   1
   8  -2  -5 19799.9 589.561   1
   8   2  -5 19896.3 598.545   1
   8  -2  -6 43270.3 917.237   1
   8   2  -6 43356.2 931.391   1
   8   2  -7 31396.6 838.344   1
   8  -2   7 30925.8 1075.32   2
   8   2   7 30231.6 1038.09   2
   8  -2  -7 30431.5 810.619   1
   8   2  -8 182.767 95.4867   1
   8  -2   8 140.673 122.132   2
   8  -2  -8 87.8778 93.3575   1
   8   2   8 174.480 131.420   2
   8   2  -9 1402.85 208.646   1
   8  -2   9 1468.42 301.350   2
   8   2   9 1265.03 248.713   2
   8  -2  -9 1550.44 215.980   1
   8   2 -10 899.602 200.542   1
   8  -2  10 533.070 238.104   2
   8   2  10 671.790 210.731   2
   8  -2 -10 713.887 151.544   1
   8  -2  11 818.020 277.203   2
   8   2 -11 675.865 180.816   1
   8   2  11 725.924 235.145   2
   8  -2 -11 423.821 155.298   1
  -8   2  12-54.5847 106.270   6
   8  -2  12 229.942 202.956   2
   8   2  12 2.33966 153.817   2
   8   2 -12-143.739 108.528   1
   8  -2 -12-21.7055 103.060   1
   8   2  13 3592.69 462.279   2
   8   2 -13 3425.31 406.209   1
   8  -2 -13 3408.99 401.585   1
   8  -2  13 3689.38 499.390   2
   8  -2  14 554.269 252.493   2
   8   2  14 465.631 207.509   2
   8   2  15 12559.2 894.946   2
   8  -2  15 12596.9 928.919   2
   8  -2  16 6287.31 659.640   2
   8   2  16 6282.05 624.026   2
   8  -2  17 793.937 259.308   2
   8   2  17 956.823 277.006   2
   8  -2  18 165.882 169.212   2
   8   2  18-216.646 194.360   2
  -8   2  18-58.9088 106.779   2
   8  -2  19 154.027 154.296   2
   8   2  19 304.059 175.876   2
  -8   2  19 108.547 107.987   2
   8  -4   0 9206.38 311.796   1
   8   4   0 9141.25 313.675   1
   8   4  -1 1023.55 115.003   1
   8   4   1 1080.67 104.751   1
   8  -4  -1 1155.51 120.067   1
   8  -4   1 902.475 98.8830   1
   8   4   2 1531.72 104.858   1
   8  -4  -2 1603.76 149.083   1
   8  -4   2 1614.99 115.772   1
   8   4  -2 1595.37 152.727   1
   8   4  -3 409.167 89.6962   1
   8   4   3 246.537 38.7647   1
   8  -4  -3 434.852 96.9600   1
   8  -4   3 234.971 42.4449   1
   8  -4  -4 8135.71 355.468   1
   8   4  -4 7636.48 352.392   1
   8   4  -5 958.041 145.509   1
   8  -4  -5 804.154 121.533   1
   8   4  -6 741.321 141.180   1
   8  -4  -6 720.052 129.063   1
   8  -4   7 3200.11 361.264   2
   8  -4  -7 2972.33 259.775   1
   8   4   7 3201.69 355.460   2
   8   4  -7 3003.91 265.827   1
   8   4  -8 934.731 165.735   1
   8  -4   8 749.935 209.151   2
   8   4   8 1333.20 228.395   2
   8  -4  -8 1126.47 185.505   1
   8  -4   9 10320.5 691.883   2
   8  -4  -9 10123.9 534.096   1
   8   4   9 10280.1 657.224   2
   8   4  -9 9999.48 554.354   1
   8   4 -10 42.2665 88.3580   1
   8  -4  10-3.30236 134.571   2
   8   4  10 10.6322 128.592   2
   8  -4 -10 40.5669 82.1296   1
  -8   4  10-86.6261 84.9859   6
   8   4 -11 3283.71 376.694   1
   8   4  11 3077.87 407.535   2
   8  -4 -11 3585.92 366.059   1
   8  -4  11 3389.17 438.836   2
  -8   4  11 3160.65 387.306   6
   8  -4  12-189.542 233.734   2
   8   4 -12 160.469 160.524   1
   8   4  12 80.2720 155.998   2
   8  -4 -12 140.299 135.321   1
  -8   4  12 575.621 218.862   6
   8  -4 -13 2587.95 377.332   1
   8  -4  13 2826.35 469.445   2
   8   4  13 2181.05 409.950   2
   8   4 -13 2317.44 327.987   1
  -8   4  13 2276.17 354.645   6
   8  -4  14 2765.18 446.846   2
   8   4  14 2013.02 383.748   2
   8   4  15 12757.5 916.491   2
   8  -4  15 13952.9 996.674   2
   8   4  16 1170.35 315.757   2
   8  -4  16 879.559 277.055   2
   8  -4  17 327.053 244.296   2
   8   4  17 250.157 177.866   2
   8  -4  18 1209.63 286.808   2
   8   4  18 1568.54 303.981   2
  -8   4  18 1720.72 298.594   2
   8  -4  19 539.758 202.051   2
   8   4  19 253.206 140.799   2
  -8   4  19 241.529 130.065   2
   8  -6   0 62351.3 851.330   1
   8  -6   1 203.885 66.0497   1
   8  -6  -1 161.919 69.8874   1
   8  -6   2 4386.94 218.084   1
   8  -6  -2 4364.98 253.694   1
   8  -6   3 394.931 74.0336   1
   8   6  -3 583.253 103.252   1
   8  -6  -3 664.062 109.102   1
   8   6   3 558.567 66.8731   1
   8   6  -4 140.469 81.8424   1
   8  -6  -4 153.742 77.2605   1
   8  -6  -5 1592.76 171.214   1
   8   6  -5 1955.70 205.062   1
   8  -6  -6 3004.99 246.842   1
   8   6  -6 2907.49 252.094   1
   8  -6   7 13629.5 765.777   2
   8   6   7 13301.1 680.222   2
   8  -6  -7 13298.1 545.180   1
   8   6  -7 14189.0 583.218   1
   8  -6   8 5546.13 503.617   2
   8   6   8 4819.48 451.934   2
   8  -6  -8 5721.69 373.707   1
   8   6  -8 5099.65 374.266   1
   8   6   9 41335.9 1287.39   2
   8  -6  -9 40054.0 1045.65   1
   8  -6   9 41424.5 1393.93   2
   8   6  -9 41889.2 1136.64   1
  -8   6  10 1211.96 243.948   6
   8   6 -10 1124.52 198.284   1
   8  -6  10 1083.51 295.352   2
   8   6  10 1060.56 245.162   2
   8  -6 -10 1033.69 191.185   1
   8  -6  11 16652.6 1004.64   2
   8   6 -11 14462.7 779.007   1
   8   6  11 14297.6 852.359   2
   8  -6 -11 14587.5 753.611   1
  -8   6  11 14627.5 821.367   6
   8  -6  12 317.683 207.963   2
   8   6 -12 351.372 129.776   1
   8   6  12 391.786 195.614   2
   8  -6 -12 346.156 178.287   1
  -8   6  12 682.262 226.442   6
   8  -6  13 263.032 172.400   2
   8   6 -13-27.5406 106.426   1
   8   6  13 124.117 197.019   2
   8  -6 -13 3.24514 115.281   1
  -8   6  13 23.1747 148.519   6
   8  -6  14 1892.54 395.943   2
   8   6  14 1218.82 338.133   2
  -8   6  14 1107.39 248.107   6
   8  -6  15 626.929 242.617   2
   8   6  15 417.291 200.529   2
   8  -6  16-146.424 219.043   2
   8   6  16 220.404 190.580   2
   8  -6  17 881.861 278.496   2
   8   6  17 910.531 236.360   2
   8  -6  18 4075.36 527.204   2
   8   6  18 3481.99 446.530   2
  -8   6  18 3809.20 418.438   2
   8  -6  19 1433.65 282.080   2
   8   6  19 1954.43 318.541   2
  -8   6  19 1222.20 249.923   2
   8  -8   0 200726. 1633.05   1
   8  -8   1 4700.40 248.716   1
   8  -8  -1 4697.38 261.641   1
   8  -8  -2 10799.0 396.851   1
   8  -8   2 10326.3 370.590   1
   8  -8   3 564.756 95.2889   1
   8  -8  -3 759.406 117.476   1
   8  -8  -4 1865.46 180.508   1
   8   8  -5 981.871 154.484   1
   8  -8  -5 1916.01 258.147   1
   8   8  -6 111.295 53.7961   1
   8  -8  -6 245.889 91.5290   1
   8  -8   7 14281.9 796.666   2
   8   8   7 14644.8 715.462   2
   8  -8  -7 14672.4 584.222   1
   8   8  -7 15555.8 626.072   1
   8  -8   8 14358.8 803.381   2
   8   8   8 15037.6 747.679   2
   8  -8  -8 15409.7 615.374   1
   8   8  -8 15159.0 656.049   1
   8  -8   9 52294.9 1598.60   2
   8   8   9 50829.1 1452.27   2
   8  -8  -9 49625.5 1219.89   1
   8   8  -9 54293.3 1316.70   1
   8   8  10 3151.70 401.987   2
   8  -8  10 2858.38 430.462   2
   8  -8 -10 2627.86 303.201   1
  -8   8  10 2549.48 340.903   6
   8   8 -10 2643.34 319.242   1
   8   8 -11 20665.4 943.922   1
   8  -8  11 24528.6 1217.38   2
   8   8  11 22513.0 1015.82   2
   8  -8 -11 21265.5 893.457   1
  -8   8  11 22700.4 1058.27   6
   8  -8 -12 188.670 179.036   1
  -8   8  12 147.104 132.117   6
   8  -8  12 205.025 171.459   2
   8   8 -12 382.255 147.845   1
   8   8  12 63.6490 120.924   2
   8   8 -13-109.174 128.145   3
   8  -8 -13-113.463 162.690   1
   8   8 -13-0.85288 107.213   1
   8   8  13 259.713 175.247   2
   8  -8  13-136.586 206.972   2
  -8   8  13-84.6051 132.344   6
   8  -8  14 712.285 287.499   2
   8   8  14 649.068 251.473   2
  -8   8  14 376.713 193.831   6
   8  -8  15 153.910 228.115   2
   8   8  15-356.494 228.378   2
   8  -8  16 611.120 267.524   2
   8   8  16 382.218 187.863   2
   8  -8  17 1411.37 335.994   2
   8   8  17 2246.74 391.665   2
   8  -8  18 5325.61 559.429   2
   8   8  18 5356.79 543.577   2
  -8   8  18 5607.89 517.471   2
   8   8  19 1638.10 290.849   2
  -8   8  19 1287.26 250.992   2
   8 -10   0 227191. 1895.84   1
   8 -10   1 2404.70 202.511   1
   8 -10  -1 2251.54 198.783   1
   8 -10   2 20534.1 585.574   1
   8 -10  -2 21607.4 595.114   1
   8 -10  -3 436.057 97.8749   1
   8 -10   3 500.963 127.162   1
   8 -10  -4 360.051 98.0644   1
   8 -10   4 597.409 126.875   1
   8 -10  -5 2794.65 233.422   1
   8 -10   6 2509.51 355.641   2
   8 -10  -6 2656.66 239.160   1
   8 -10   7 1454.02 272.210   2
   8 -10  -7 1583.80 197.923   1
   8  10   7 1343.96 253.247   2
   8  10  -7 1484.45 208.905   1
   8  10  -8 5941.94 425.703   1
   8  10   8 5411.51 481.578   2
   8 -10  -8 5918.42 390.853   1
   8 -10   8 5692.16 530.412   2
  -8  10   8 5045.29 463.899   6
  -8  10   9 54030.2 1538.32   6
   8  10   9 55730.4 1479.43   2
   8 -10  -9 55039.7 1258.19   1
   8 -10   9 58854.0 1707.41   2
   8  10  -9 57213.5 1374.47   1
   8  10 -10 314.519 140.749   1
   8  10  10 500.673 201.073   6
   8 -10  10 202.355 172.494   2
   8  10  10 298.070 172.572   2
   8 -10 -10 181.259 95.9959   1
  -8  10  10 303.406 154.910   6
   8 -10  11 12627.4 888.679   2
   8  10  11 11410.5 746.246   2
   8 -10 -11 11169.2 657.113   1
  -8  10  11 12410.9 789.127   6
   8  10 -11 12540.6 783.280   3
   8  10 -11 11388.3 695.605   1
   8  10 -12 336.128 137.974   3
   8  10 -12 351.968 157.049   1
   8 -10  12 210.933 217.101   2
  -8  10  12 391.542 193.170   6
   8  10  12 235.339 136.707   2
   8 -10 -12 181.323 140.804   1
  -8  10  13 10196.8 771.684   6
   8  10 -13 7193.16 634.585   1
   8 -10  13 11031.8 894.768   2
   8  10  13 7751.57 717.081   2
   8 -10 -13 6746.75 609.155   1
   8  10 -13 11767.1 870.222   3
  -8  10  14 354.206 192.484   6
   8 -10  14 138.903 209.324   2
   8  10  14 4.17228 150.492   2
   8 -10  15-228.127 264.819   2
   8  10  15 286.291 197.064   2
  -8  10  15 152.886 186.095   6
   8 -10  16-114.111 207.666   2
   8  10  16-79.2015 142.861   2
   8 -10  17 854.052 286.973   2
   8  10  17 1092.24 273.193   2
  -8  10  18 5149.73 483.979   2
   8  10  18 4675.72 489.964   2
  -8  10  19 966.073 222.194   2
   8  10  19 1247.27 268.611   2
   8 -12   0 175409. 1830.38   1
   8 -12   1 2340.15 222.800   1
   8 -12  -1 2181.28 215.248   1
   8 -12   2 19365.9 633.266   1
   8 -12  -2 19807.3 598.245   1
   8 -12  -3 138.859 79.9924   1
   8 -12   3 229.171 86.7847   1
   8 -12   4 36140.0 921.500   1
   8 -12  -4 42594.5 919.020   1
   8 -12  -5 13615.0 536.909   1
   8  12  -5 13765.6 657.561   3
   8 -12   6 8784.13 664.625   2
   8  12  -6 10090.9 584.067   3
   8 -12  -6 10209.8 477.799   1
  -8  12   7 2628.58 331.455   6
   8 -12   7 2538.65 341.099   2
   8  12   7 2137.46 284.241   2
   8 -12  -7 2882.82 271.926   1
   8  12  -7 2743.04 313.212   3
  -8  12   8 1822.56 293.057   6
   8  12   8 1560.97 266.487   2
   8 -12  -8 1784.24 229.962   1
   8  12  -8 2012.21 262.754   1
   8 -12   8 2216.68 353.062   2
   8  12  -8 2435.34 317.749   3
   8 -12   9 22052.0 1129.63   2
   8  12   9 24496.9 987.714   2
   8 -12  -9 24408.1 865.192   1
  -8  12   9 24913.5 1067.11   6
   8  12  -9 24740.5 921.000   1
   8  12  -9 23031.2 977.658   3
   8  12 -10 1300.89 243.887   1
   8 -12  10 1165.81 288.660   2
   8 -12 -10 1215.52 211.550   1
   8  12  10 1290.27 260.318   2
   8  12  10 1106.12 300.598   6
   8  12 -10 1680.93 386.478   3
  -8  12  10 1092.82 273.302   6
   8  12 -11 1941.12 289.241   1
   8 -12 -11 1801.73 288.074   1
   8 -12  11 2564.83 479.743   2
   8  12  11 2086.92 339.190   2
   8  12 -11 2659.26 346.556   3
   8  12  11 2209.42 391.863   6
  -8  12  11 2315.54 375.503   6
   8  12 -12 508.015 210.039   3
   8 -12 -12-68.6113 114.975   1
   8  12 -12 236.056 123.580   1
   8 -12  12 448.724 251.153   2
   8  12  12 38.6621 171.022   2
  -8  12  12 212.725 152.339   6
  -8  12  13 1251.08 275.159   6
   8 -12  13 1211.06 317.623   2
   8  12  13 1220.28 275.367   2
   8 -12  14 242.025 239.558   2
   8  12  14 482.872 210.672   2
  -8  12  14 529.672 237.172   6
   8 -12  15 727.960 271.806   2
   8  12  15 549.785 204.783   2
  -8  12  15 607.178 264.604   6
   8 -12  16-25.3367 179.469   2
   8  12  16-122.119 165.763   2
   8  12  17-190.942 158.944   2
   8  12  18 605.216 221.840   2
   8  12  19 416.929 155.717   2
  -8  12  19 447.230 166.848   2
   8 -14   0 62411.4 1196.45   1
   8 -14   1 1017.87 171.404   1
   8 -14  -1 1065.17 171.069   1
   8 -14   2 1237.53 188.417   1
   8 -14  -2 1212.38 167.029   1
   8 -14   3 8757.89 484.765   1
   8 -14  -3 8184.53 425.619   1
   8 -14   4 36645.3 1031.48   1
   8  14  -4 38433.3 1049.42   3
   8 -14  -5 24039.7 741.014   1
   8  14  -5 24408.9 870.945   3
   8 -14   6 9915.21 649.356   5
   8  14  -6 12490.6 645.526   3
   8 -14  -6 12939.5 558.789   1
  -8  14   6 10493.7 609.677   6
   8  14   7 5358.34 438.865   2
   8 -14  -7 5991.73 410.676   1
   8  14  -7 6384.30 469.681   3
  -8  14   7 5834.47 489.593   6
  -8  14   8 101.942 157.529   6
   8  14  -8-55.1394 105.450   1
   8  14  -8 202.718 138.762   3
   8 -14   8 140.616 136.824   2
   8 -14  -8-26.0851 99.8644   1
   8  14   8 97.4186 121.080   2
   8  14  -9 2084.78 318.050   3
   8 -14   9 2221.82 391.643   2
   8 -14  -9 1916.97 248.742   1
   8  14   9 1943.28 294.560   2
   8  14  -9 1885.42 280.823   1
  -8  14   9 1912.25 310.194   6
   8  14  10-101.816 166.952   6
   8  14 -10 221.042 136.330   3
   8  14 -10 60.5242 128.854   1
   8 -14  10-319.405 188.492   2
   8 -14 -10-38.9062 94.2899   1
   8  14  10 129.559 124.289   2
  -8  14  10 108.254 141.749   6
   8  14  11 3937.55 440.365   2
   8 -14  11 4518.61 586.290   2
   8  14  11 3954.78 477.136   6
   8 -14 -11 3850.79 427.803   1
  -8  14  11 4374.07 502.119   6
   8  14 -11 4438.77 457.255   3
   8  14 -11 3900.42 424.488   1
   8 -14  12-161.989 182.017   2
   8  14 -12-44.4047 88.0971   1
   8 -14 -12-31.0191 94.8225   1
   8  14  12-146.021 123.010   2
   8  14 -12-182.340 172.885   3
  -8  14  12 92.6172 141.512   6
   8 -14  13 2496.96 436.120   2
  -8  14  13 3020.16 462.656   6
   8  14  13 2355.34 366.943   2
   8 -14  14 2198.09 428.582   2
   8  14  14 2408.13 391.089   2
  -8  14  14 2330.50 398.365   6
   8  14  15 6954.32 624.769   2
  -8  14  15 6870.99 646.326   6
   8  14  16 1086.33 276.363   2
  -8  14  16 1316.94 254.622   6
   8  14  17-81.4215 143.491   2
   8  14  18 79.4355 136.841   2
  -8  14  18 222.378 150.491   2
  -8  14  19-82.8225 133.789   2
   8 -16   0 10164.7 528.017   1
   8 -16   1 167.141 98.9963   1
   8 -16  -1 38.4743 69.4488   1
   8 -16  -2 31316.0 895.555   1
   8  16  -2 28218.7 878.178   3
   8 -16   2 28748.0 943.982   1
   8 -16   3 6846.55 466.034   1
   8  16  -3 6275.57 422.745   3
   8 -16  -3 6677.21 419.802   1
  -8  16   4 25213.8 966.032   6
   8  16  -4 26324.5 890.469   3
   8 -16  -4 27876.9 836.147   1
  -8  16   5 16533.9 798.130   6
   8  16  -5 17811.6 754.696   3
   8 -16  -5 17260.4 670.585   1
   8  16   6 14814.7 734.698   4
   8 -16  -6 16158.7 653.201   1
   8  16  -6 16413.8 747.311   3
  -8  16   6 16411.9 793.441   6
   8 -16  -7 11172.9 574.591   1
   8  16  -7 10472.0 619.613   3
  -8  16   7 11574.3 698.703   6
   8  16  -8 708.963 201.424   3
  -8  16   8 898.313 222.529   6
   8 -16  -8 969.633 195.956   1
   8  16   8 848.909 199.741   2
   8  16  -9 155.826 136.917   3
   8  16  -9 178.832 130.076   1
   8 -16  -9 199.516 122.176   1
   8  16   9 76.0732 116.699   2
  -8  16   9-158.919 157.241   6
   8  16 -10 251.868 146.045   1
   8 -16 -10 197.576 106.771   1
   8  16  10 387.392 123.718   2
  -8  16  10 315.362 190.356   6
   8  16 -10 468.138 181.591   3
   8  16 -11 71.7372 111.621   1
   8  16 -11-64.8491 132.785   3
   8 -16 -11 109.466 113.392   1
   8  16  11 78.0050 123.630   2
   8  16  11 134.959 155.565   6
  -8  16  11 270.701 190.592   6
   8  16 -12 258.696 153.247   1
   8  16  12 447.656 225.391   2
   8 -16 -12 111.064 90.4889   1
   8  16  12 114.450 171.142   6
  -8  16  12 210.274 171.456   6
   8  16 -12 175.177 128.664   3
  -8  16  13 19670.7 1090.07   6
   8  16  13 18762.0 982.996   2
   8  16  14 3483.82 476.933   2
  -8  16  14 3295.44 457.105   6
   8  16  15 18368.9 999.930   2
  -8  16  15 18155.0 1029.76   6
   8  16  16 6589.81 599.534   2
  -8  16  16 6834.85 603.594   6
   8  16  17 1766.83 329.066   2
   8  16  18 168.533 130.627   2
  -8  16  18 143.684 108.181   2
   8 -18   0 218.422 119.347   1
   8 -18   1 1450.73 247.605   1
   8 -18  -1 1503.61 215.838   1
   8 -18   2 11305.8 628.006   1
   8 -18  -2 11573.8 591.073   1
   8 -18  -2 9358.45 523.000   5
  -8  18   3 4432.13 449.741   6
   8  18  -3 4923.36 396.851   3
   8 -18  -3 4390.10 368.824   5
   8 -18   3 4432.00 429.381   1
   8 -18  -3 4521.27 375.795   1
   8 -18  -4 38911.9 1059.25   1
  -8  18   4 40190.0 1283.16   6
   8  18   4 38839.9 1149.78   4
   8  18  -4 38032.3 1102.16   3
  -8  18   5 28005.9 1092.17   6
   8  18   5 27025.5 1026.92   4
   8  18  -5 28575.5 982.043   3
   8 -18  -5 27620.7 897.596   1
   8  18   6 18291.8 863.526   4
   8  18  -6 18942.0 823.342   3
   8 -18  -6 18709.2 752.398   1
  -8  18   6 19247.9 911.845   6
   8  18   7 12035.9 716.797   4
   8  18  -7 13982.8 728.115   3
   8 -18  -7 13253.4 649.520   1
  -8  18   7 13439.1 785.835   6
  -8  18   8 158.360 116.062   6
   8 -18  -8 456.615 147.768   1
   8  18  -8 125.075 146.392   3
  -8  18   9 1807.20 309.588   6
   8  18  -9 1285.86 232.352   1
   8  18   9 1536.57 284.290   2
   8 -18  -9 1764.86 280.455   1
   8  18  -9 1519.09 281.448   3
   8  18 -10 54.0934 89.8042   1
   8  18  10 115.646 130.334   2
   8 -18 -10 71.8264 97.0600   1
   8  18 -10 175.555 150.850   3
  -8  18  10 382.952 200.094   6
   8  18 -11 947.694 253.848   3
   8  18  11 443.049 179.322   6
   8  18  11 849.228 251.022   2
   8 -18 -11 693.606 232.255   1
   8  18 -11 590.275 172.584   1
  -8  18  11 590.625 226.843   6
   8  18  12 640.588 214.618   2
   8  18  12 489.115 184.487   6
  -8  18  12 1041.84 286.323   6
   8  18  13 14356.5 858.285   2
  -8  18  13 15574.1 965.311   6
   8  18  14 4382.16 499.982   2
  -8  18  14 4303.28 516.617   6
  -8  18  15 16075.0 970.249   6
   8  18  15 17542.6 962.950   2
  -8  18  16 7014.99 609.990   6
   8  18  16 7306.44 627.128   2
   8  18  17 1822.19 309.552   2
   8  18  18 134.206 130.331   2
  -8  18  18 56.7533 88.1301   2
   8 -20   0 6705.89 465.723   5
   8 -20   0 8698.15 585.083   1
   8 -20  -1 166.086 86.7149   5
   8 -20   1 304.737 127.741   1
   8 -20  -1 155.766 132.646   1
   8 -20   2 72.4243 126.265   1
   8 -20  -2-33.5810 108.423   1
   8 -20  -2 192.817 136.866   5
   8 -20  -3 1507.47 242.408   1
   8 -20   3 1495.26 312.247   1
  -8  20   3 1558.19 296.904   6
   8 -20  -3 1559.70 254.574   5
   8 -20  -4 19165.0 800.910   1
   8  20   4 19910.1 868.701   4
  -8  20   5 18384.1 901.683   6
   8 -20  -5 17385.4 776.747   1
   8  20   5 18145.5 863.159   4
   8 -20  -6 20056.4 852.935   1
  -8  20   6 22777.9 1013.41   6
   8  20   6 22404.3 962.714   4
   8  20  -6 22435.9 921.980   3
   8 -20  -7 9359.85 590.460   1
   8  20   7 8855.82 640.084   4
   8  20  -7 11216.2 666.505   3
  -8  20   7 9870.17 704.687   6
  -8  20   8 126.338 113.803   6
   8 -20  -8 62.2179 85.6864   1
   8  20  -8-42.7183 117.780   3
   8 -20  -9 2573.13 343.821   1
   8  20  -9 3128.11 397.739   3
  -8  20   9 3240.33 434.425   6
   8  20 -10 108.077 89.0000   1
  -8  20  10 266.650 201.796   6
   8  20  10 235.525 149.221   2
   8 -20 -10 203.479 137.944   1
  -8  20  11 1290.13 308.464   6
   8  20  11 83.8462 156.330   2
   8  20  12 73.9961 147.946   2
  -8  20  12 115.132 143.768   6
   8  20  13 6831.12 612.763   2
  -8  20  13 6559.56 633.625   6
  -8  20  14 2807.18 419.600   6
   8  20  14 3181.50 418.595   2
   8  20  15 14649.9 904.356   2
  -8  20  15 14529.5 896.397   6
   8  20  16 3200.88 404.974   2
  -8  20  16 2921.43 385.697   6
   8  20  17 686.039 217.353   2
  -8  20  18-120.352 102.264   2
   8 -22   0 34144.3 1103.34   5
   8 -22   0 46287.0 1455.10   1
   8 -22   1 927.074 242.271   1
   8 -22  -1 1218.87 258.273   1
   8 -22  -1 591.632 150.419   5
   8 -22  -2 3096.14 318.741   5
   8 -22  -2 4222.67 423.075   1
   8 -22   2 3629.46 452.843   1
  -8  22   3 345.341 145.171   6
   8 -22   3 643.340 236.000   1
   8 -22  -3 344.046 145.699   1
   8 -22  -3 280.143 129.376   5
   8  22   3 262.257 105.574   4
  -8  22   4 5365.84 513.009   6
   8 -22  -4 5259.20 460.545   1
   8 -22  -4 5575.28 434.952   5
   8  22   4 5693.92 478.348   4
  -8  22   5 4380.56 475.603   6
   8 -22  -5 3740.12 397.994   1
   8  22   5 4889.48 479.728   4
   8 -22  -6 8634.95 589.602   1
  -8  22   6 9551.91 692.512   6
   8  22   6 9590.22 660.091   4
   8 -22  -7 13964.1 756.544   1
   8  22   7 15566.8 866.764   4
  -8  22   7 15810.1 894.092   6
  -8  22   8 29.6719 162.006   6
   8 -22  -8 217.124 120.842   1
   8 -22  -9 11998.9 774.026   1
  -8  22   9 14386.1 902.276   6
   8 -22 -10 969.430 244.582   1
  -8  22  10 938.278 277.034   6
   8  22 -10 482.387 160.479   1
  -8  22  11 7673.76 680.308   6
  -8  22  12 245.987 161.634   6
  -8  22  13 387.734 201.049   6
   8  22  13 398.521 192.391   2
   8  22  14 248.283 149.055   2
  -8  22  14 178.366 139.144   6
  -8  22  15 2193.47 351.364   6
   8  22  15 2454.68 353.828   2
   8  22  16 956.538 248.982   2
  -8  22  16 787.629 222.270   6
   8 -24   0 97803.1 2235.58   1
   8 -24   1 6617.19 604.425   1
   8 -24  -1 5557.20 521.070   1
   8 -24  -2 10784.8 733.693   1
   8  24   2 12904.5 698.197   4
   8 -24   2 10406.8 799.944   1
  -8  24   3 399.645 229.007   6
   8 -24  -3 407.977 141.878   5
   8  24   3 397.215 142.472   4
   8 -24  -3 446.727 182.001   1
   8 -24  -4 59.6525 92.8075   5
  -8  24   4-93.2332 167.047   6
   8 -24  -4-196.327 145.033   1
   8  24   4-15.4978 112.503   4
  -8  24   5 2507.87 375.392   6
   8 -24  -5 2025.78 315.560   1
   8 -24  -5 1978.11 281.045   5
   8  24   5 2125.57 320.587   4
  -8  24   6 3312.48 440.403   6
   8 -24  -6 2660.36 358.901   1
   8  24   6 3276.21 403.132   4
  -8  24   7 458.761 190.340   6
   8 -24  -7 305.574 136.468   1
   8  24   7 636.508 237.348   4
  -8  24   8 348.668 213.065   6
   8 -24  -8 451.743 158.963   1
   8 -24  -9 14911.3 890.879   1
  -8  24   9 19404.2 1074.85   6
  -8  24  10 2682.83 424.209   6
  -8  24  11 14940.5 977.034   6
  -8  24  12 1273.45 322.843   6
  -8  24  13 1528.42 319.128   6
  -8  24  14-26.7584 125.981   6
  -8  24  15 345.227 189.024   6
  -8  24  16 69.9847 142.270   6
   8 -24 -17 773.908 165.769   5
  -8  24  17 687.232 167.961   2
   8 -26   0 67404.4 2025.58   1
   8 -26  -1 4392.31 520.125   1
   8 -26   1 3819.21 518.658   1
   8  26   1 4714.96 424.458   4
  -8  26   2 20779.2 1109.59   6
   8 -26  -2 18202.9 1005.97   1
   8  26   2 19570.0 865.789   4
   8 -26   2 19434.4 1147.67   1
  -8  26   3 449.637 154.537   6
   8 -26  -3 607.058 216.209   1
   8 -26  -3 311.561 135.983   5
   8  26   3 532.184 175.497   4
  -8  26   4 143.112 189.221   6
   8 -26  -4 2.92509 111.849   5
   8  26   4 186.384 111.702   4
   8 -26  -4 157.616 98.7122   1
  -8  26   5 271.311 183.576   6
   8 -26  -5 365.484 143.753   5
   8  26   5 176.051 147.153   4
   8 -26  -5 172.342 104.926   1
  -8  26   6 146.664 192.170   6
   8 -26  -6 43.1689 141.452   5
   8  26   6 177.798 152.827   4
   8 -26  -6 51.4614 142.468   1
  -8  26   7 1731.90 338.489   6
   8  26   7 1574.07 301.941   4
   8 -26  -7 1280.90 308.509   1
  -8  26   8 3494.00 471.423   6
   8 -26  -8 2797.56 403.978   1
  -8  26   9 15500.1 971.488   6
  -8  26  10 1474.75 340.698   6
  -8  26  11 32559.1 1429.60   6
  -8  26  12 1030.10 304.649   6
  -8  26  13 2158.64 380.141   6
  -8  26  14 367.794 187.339   6
  -8  26  15-29.9401 147.386   6
  -8  26  16-34.7010 119.200   6
   8 -26 -16 192.710 133.280   5
   8 -28   0 24233.0 1343.99   1
   8  28   0 30082.1 1097.48   4
   8 -28  -1 2835.54 451.932   1
   8 -28   1 2603.72 465.437   1
   8  28   1 2277.36 305.640   4
  -8  28   2 3628.15 470.695   6
   8  28   2 3499.68 386.010   4
   8 -28  -2 2706.60 423.535   1
  -8  28   3 85.7538 165.178   6
   8 -28  -3 311.767 141.162   1
   8  28   3 245.022 144.410   4
  -8  28   4 699.566 262.395   6
   8 -28  -4 376.767 260.967   1
   8  28   4 355.613 157.689   4
  -8  28   5 388.853 177.323   6
   8 -28  -5 68.4531 146.268   1
   8 -28  -5 679.306 278.750   5
   8  28   5 392.198 162.877   4
  -8  28   6 289.315 180.957   6
   8 -28  -6 70.1754 153.062   1
   8 -28  -6-80.7235 97.9160   5
   8  28   6 49.8861 103.732   4
  -8  28   7 2372.50 388.700   6
   8 -28  -7 1775.16 376.023   1
   8 -28  -7 2453.59 319.121   5
  -8  28   8 3840.87 519.883   6
  -8  28   9 18573.7 1087.05   6
  -8  28  10 2842.15 422.930   6
  -8  28  11 5674.38 620.442   6
  -8  28  12 225.200 166.941   6
  -8  28  13 97.6642 132.759   6
  -8  28  14 109.369 134.725   6
   8 -28 -15 199.513 115.752   5
  -8  28  15 91.9359 156.219   6
   8  30   0 10336.2 658.757   4
   8 -30   0 9001.19 856.484   1
   8 -30  -1 536.152 189.210   1
   8  30   1 843.232 225.347   4
   8  30  -1 674.093 170.275   4
   8 -30   1 683.951 261.230   1
  -8  30   2 247.418 162.409   6
   8 -30  -2 246.200 157.666   1
   8  30   2 329.959 147.527   4
   8 -30  -3 415.953 171.611   1
  -8  30   3 665.326 222.942   6
   8  30   3 423.978 165.081   4
   8 -30  -4 3206.77 476.587   1
  -8  30   4 4562.47 535.515   6
   8  30   4 3524.27 400.525   4
  -8  30   5 2366.17 371.426   6
   8  30   5 2261.07 341.267   4
   8 -30  -5 1900.16 376.696   1
  -8  30   6 603.028 252.717   6
   8 -30  -6 802.831 212.791   5
   8  30   6 1066.80 252.742   4
  -8  30   7-67.5042 136.942   6
   8 -30  -7 174.081 153.856   5
  -8  30   8 2969.41 431.655   6
   8 -30  -8 1084.99 229.440   5
   8 -30  -9 14976.9 808.442   5
  -8  30   9 16152.0 1009.82   6
   8 -30 -10 495.631 169.751   5
  -8  30  10 395.491 203.997   6
  -8  30  11 52.4129 141.666   6
   8 -30 -11 96.0498 108.628   5
   8 -30 -12 125.671 108.567   5
  -8  30  12 106.859 169.350   6
   8 -30 -13 419.110 143.389   5
  -8  30  13 483.665 213.800   6
  -8  30  14 263.499 157.560   6
   8 -30 -14 396.381 119.533   5
   8 -30 -15 939.695 178.482   5
  -8  30  15 715.146 209.425   6
   8 -32   0 122.404 162.719   1
   8  32   0-11.5951 99.6924   4
  -8  32   1 1174.55 303.121   6
   8 -32  -1 1008.30 329.748   1
   8  32   1 935.331 212.828   4
   8  32  -1 1629.48 278.170   4
   8  32  -2 911.362 199.232   4
  -8  32   2 822.170 248.035   6
   8 -32  -2 561.802 314.478   1
   8  32   2 731.839 215.323   4
   8  32   3 2821.21 356.641   4
   8  32  -3 3140.76 389.644   4
  -8  32   3 3512.88 473.973   6
  -8  32   4 18055.6 1065.86   6
   8  32   4 16739.9 904.598   4
   8  32  -4 16666.0 882.565   4
  -8  32   5 6825.89 628.767   6
   8  32   5 6688.38 596.138   4
   8  32  -5 8385.69 617.952   4
  -8  32   6 5311.09 582.036   6
  -8  32   7 3553.45 497.234   6
  -8  32   8 589.911 236.839   6
   8  32  -8 4.80460 90.5449   4
  -8  32   9-19.1706 146.770   6
   8 -32  -9 272.928 124.014   5
   8 -32 -10 110.199 126.688   5
  -8  32  10 300.848 189.453   6
   8 -32 -11 31.2574 123.708   5
  -8  32  11 82.1501 159.336   6
   8 -32 -12 68.2039 82.3298   5
  -8  32  12 79.1331 120.479   6
   8 -32 -13 3409.16 316.773   5
  -8  32  13 2738.83 373.431   6
   8 -32 -14 620.329 140.067   5
  -8  32  14 819.251 200.375   6
  -8  34   0 14325.2 915.337   6
   8  34   0 13737.3 810.723   4
  -8  34   1 254.624 195.024   6
   8  34   1 89.8134 100.814   4
   8  34  -1 184.508 140.367   4
  -8  34   2 3323.28 461.390   6
   8  34   2 2684.38 353.368   4
   8  34  -2 2932.63 368.374   4
  -8  34   3 5045.21 546.805   6
   8  34   3 4237.64 457.466   4
   8  34  -3 4677.63 480.732   4
  -8  34   4 21449.8 1112.80   6
   8  34   4 20746.2 1010.03   4
   8  34  -4 20361.3 996.689   4
  -8  34   5 11095.7 808.074   6
   8  34   5 11955.0 778.270   4
   8  34  -5 13201.4 801.243   4
   8  34  -6 9992.72 693.359   4
  -8  34   6 10509.4 788.498   6
   8  34  -7 4946.39 487.565   4
  -8  34   7 4821.72 544.679   6
  -8  34   8 1202.68 291.486   6
   8  34  -8 1439.77 276.742   4
  -8  34   9 601.997 226.846   6
  -8  34  10 524.227 222.138   6
  -8  34  11 691.395 229.348   6
  -8  34  12 166.477 142.168   6
  -8  34  13 3444.04 418.175   6
  -8  36   0 4892.68 542.797   6
   8  36   0 5176.90 483.026   4
  -8  36   1 134.208 125.238   6
   8  36   1 122.668 97.4694   4
  -8  36   2 5151.57 547.654   6
   8  36   2 4610.85 478.180   4
   8  36  -2 5396.73 507.700   4
  -8  36   3 1609.07 339.921   6
   8  36   3 1758.58 299.201   4
   8  36  -3 1709.37 304.439   4
  -8  36   4 12811.3 852.805   6
   8  36   4 12340.1 783.285   4
   8  36  -4 12267.0 773.537   4
   8  36  -5 12036.6 768.663   4
  -8  36   5 10684.5 786.579   6
   8  36  -6 6326.87 546.019   4
  -8  36   6 6618.63 606.036   6
   8  36  -7 8066.43 604.590   4
  -8  36   7 8454.80 681.686   6
  -8  36   8 746.015 214.252   6
  -8  36   9-97.4310 141.955   6
  -8  36  10-109.038 174.305   6
  -8  36  11-44.8168 104.365   6
  -8  36  12 45.4596 110.977   6
  -8  38   0 952.830 267.256   6
   8  38   0 1039.18 246.923   4
  -8  38  -1 133.301 161.415   6
   8  38   1 309.997 155.281   4
   8  38  -1 438.218 167.688   4
  -8  38   1 65.5714 152.255   6
  -8  38   2 1413.21 313.481   6
   8  38   2 1354.22 256.329   4
   8  38  -2 1560.40 270.297   4
  -8  38   3 312.836 161.316   6
   8  38   3 718.833 212.136   4
   8  38  -3 774.659 216.572   4
   8  38  -4 3369.79 414.422   4
  -8  38   4 3197.86 424.503   6
   8  38  -5 2999.52 373.381   4
  -8  38   5 2996.94 420.119   6
   8  38  -6 3735.23 406.581   4
  -8  38   6 4068.59 476.079   6
   8  38  -7 731.334 195.782   4
  -8  38   7 708.235 209.389   6
  -8  38   8-125.382 147.237   6
  -8  38   9 1271.83 269.984   6
  -8  38  10 359.369 163.773   6
  -8  38  11 538.122 182.553   6
  -8  40   0 2999.54 413.695   6
   8  40   0 2710.86 359.563   4
  -8  40   1 846.600 243.939   6
  -8  40  -1 323.608 189.589   6
   8  40   1 495.314 165.013   4
   8  40  -1 666.341 194.831   4
  -8  40  -2 1940.61 351.787   6
  -8  40   2 2120.24 356.522   6
   8  40  -2 1760.45 298.363   4
  -8  40  -3 338.890 178.458   6
  -8  40   3 175.642 111.879   6
   8  40  -3 224.225 161.432   4
  -8  40   4 10.2098 117.016   6
   8  40  -4 129.705 99.3011   4
  -8  40   5-44.9598 126.817   6
   8  40  -5 371.976 165.973   4
  -8  40   6 145.272 149.625   6
   8  40  -6 76.3623 107.320   4
  -8  40   7 238.348 139.868   6
  -8  40   8 1147.79 235.435   6
  -8  40   9 7452.49 561.422   6
  -8  40  10 976.193 197.140   6
  -8  42   0 11868.5 736.461   6
  -8  42   1 1322.09 261.619   6
  -8  42  -1 1734.61 309.897   6
   8  42  -1 1559.40 280.335   4
  -8  42   2 3054.38 383.477   6
  -8  42  -2 3195.07 402.646   6
   8  42  -2 2782.46 347.698   4
  -8  42   3 470.621 168.206   6
  -8  42  -3 917.970 242.363   6
   8  42  -3 526.242 217.686   4
  -8  42  -4 2292.81 348.870   6
  -8  42   4 1941.14 302.483   6
   8  42  -4 2078.48 309.246   4
  -8  42   5 121.192 130.936   6
  -8  42  -5 125.342 118.606   6
   8  42  -5 158.950 120.446   4
  -8  42   6 519.173 176.163   6
  -8  42   7 1711.46 258.048   6
  -8  42   8 2286.82 308.226   6
  -8  42   9 10734.6 591.416   6
  -8  44   0 14738.0 769.533   6
  -8  44   1 1378.68 238.642   6
  -8  44  -1 2009.86 304.570   6
  -8  44  -2 3848.50 399.076   6
  -8  44   2 3992.58 389.293   6
  -8  44  -3 613.260 193.982   6
  -8  44   3 337.593 116.303   6
  -8  44   4 337.781 146.317   6
  -8  44  -4 403.179 166.186   6
  -8  44   5 216.602 93.9603   6
  -8  44  -5-10.4190 120.016   6
  -8  44   6-85.3019 86.8100   6
  -8  44  -6-32.7839 99.0716   6
  -8  44  -7 2387.11 303.447   6
  -8  44   7 2050.73 256.268   6
  -8  46   0 10155.1 581.173   6
  -8  46   1 1082.88 205.817   6
  -8  46  -1 1228.03 225.163   6
  -8  46  -2 2969.78 326.809   6
  -8  46   2 2809.94 308.852   6
  -8  46   3 44.6278 73.3149   6
  -8  46  -3 372.054 137.320   6
  -8  46   4 290.549 136.655   6
  -8  46  -4 190.905 112.347   6
   9   1   0 597.549 88.9277   1
   9  -1   0 547.177 82.4344   1
   9   1  -1 24589.7 567.896   1
   9  -1  -1 23854.0 552.873   1
   9  -1   1 24386.2 480.269   1
   9   1   1 23569.7 473.265   1
   9   1  -2 1259.94 149.138   1
   9   1   2 1149.76 93.0132   1
   9  -1  -2 1137.47 134.330   1
   9  -1   2 1246.06 99.7373   1
   9   1  -3 254.380 86.2571   1
   9  -1  -3 165.287 66.7947   1
   9  -1  -4 1405.41 174.312   1
   9   1  -4 1121.37 150.634   1
   9   1  -5 25175.9 692.247   1
   9  -1  -5 23813.6 681.294   1
   9   1  -6 25742.3 762.300   1
   9  -1  -6 26381.5 758.514   1
   9  -1   6 25297.2 1005.90   2
   9  -1   6 25767.5 1005.45   5
   9   1  -7 7628.68 423.220   1
   9  -1   7 7029.47 583.163   2
   9  -1  -7 7590.15 427.086   1
   9   1   7 7327.03 577.639   2
   9   1   8 14212.8 778.071   2
   9   1  -8 14733.9 628.776   1
   9  -1  -8 15389.4 634.540   1
   9  -1   8 15560.2 819.617   2
   9  -1   9 443.423 142.584   2
   9   1  -9 747.074 166.703   1
   9   1   9 593.068 223.619   2
   9  -1  -9 633.837 153.911   1
   9   1 -10 2704.31 311.230   1
   9  -1  10 3288.98 437.349   2
   9   1  10 3337.92 434.181   2
   9  -1 -10 2881.49 304.390   1
   9  -1  11 110.881 153.866   2
   9   1  11 96.9172 185.733   2
   9   1 -11 328.953 165.865   1
   9  -1 -11 117.058 102.339   1
   9  -1  12 7357.44 665.369   2
   9   1 -12 6872.52 542.174   1
   9  -1 -12 6947.84 551.115   1
   9  -1  13 264.220 188.430   2
   9   1  13 329.988 253.462   2
   9   1 -13 504.675 190.990   1
   9  -1 -13 359.321 145.516   1
   9  -1  14 5873.49 641.011   2
   9   1  14 5836.84 618.847   2
   9  -1  15 1539.12 391.285   2
   9   1  15 1378.16 317.674   2
   9  -1  16 3729.37 515.888   2
   9   1  16 3047.43 476.587   2
   9  -1  17 904.543 291.158   2
   9   1  17 1205.39 323.944   2
   9  -1  18 175.706 167.153   2
   9   1  18 399.654 220.074   2
   9  -1  19 743.558 224.722   2
   9   1  19 761.147 237.046   2
   9   3   0 34.2311 43.6599   1
   9  -3   0-45.9714 53.2539   1
   9   3   1 3648.59 191.458   1
   9  -3  -1 3949.95 231.411   1
   9  -3   1 3754.63 196.808   1
   9   3  -1 3893.42 231.068   1
   9  -3   2 91.1371 40.4315   1
   9   3   2 113.379 42.6859   1
   9  -3  -2 90.9055 47.9080   1
   9   3  -2 11.1019 58.4485   1
   9  -3  -3 13125.4 459.964   1
   9   3  -3 12681.0 466.670   1
   9   3  -4 428.419 105.484   1
   9  -3  -4 407.152 97.6772   1
   9  -3  -5 2894.81 240.607   1
   9   3  -5 2839.58 242.396   1
   9  -3  -6 4933.67 321.526   1
   9  -3   6 4926.86 457.715   2
   9  -3   6 4455.88 415.872   5
   9   3  -6 4898.55 337.607   1
   9   3  -7 4789.37 360.059   1
   9  -3   7 4558.71 462.958   2
   9  -3  -7 4425.23 318.387   1
   9   3   7 4309.32 411.952   2
   9   3  -8 1653.80 229.847   1
   9  -3  -8 1531.12 210.976   1
   9  -3   8 1461.18 268.531   2
   9   3   8 1194.32 266.734   2
   9   3  -9 152.422 115.710   1
   9  -3   9 195.321 138.657   2
   9   3   9 71.6092 153.349   2
   9  -3  -9 83.8924 94.8261   1
   9  -3  10 179.593 161.684   2
   9   3 -10 228.524 117.357   1
   9   3  10 255.139 184.180   2
   9  -3 -10 190.633 91.9086   1
   9  -3  11 4.21418 151.596   2
   9   3 -11 125.635 118.072   1
   9   3  11 232.265 225.053   2
   9  -3 -11 103.301 111.039   1
   9   3 -12 2780.32 362.670   1
   9  -3 -12 2534.06 339.722   1
   9  -3  12 2948.18 442.693   2
   9   3  12 2130.25 361.032   2
   9  -3  13-147.463 207.201   2
   9   3  13 177.979 181.987   2
   9   3 -13 61.8917 89.4009   1
   9  -3 -13-48.9773 134.205   1
   9   3  14 3772.40 516.152   2
   9  -3  14 5221.59 618.378   2
   9  -3  15 2103.78 430.460   2
   9   3  15 1941.30 392.356   2
   9  -3  16 261.211 232.840   2
   9   3  16 375.240 263.492   2
   9  -3  17-4.07288 209.347   2
   9   3  17-39.1378 153.508   2
   9  -3  18 176.409 204.571   2
   9   3  18 156.637 166.339   2
  -9   3  18 49.0195 126.523   2
   9  -3  19-317.148 174.094   2
   9   3  19 63.0037 125.384   2
   9   5   0 338.773 77.7750   1
   9  -5   0 367.569 75.0403   1
   9   5  -1 473.451 93.9853   1
   9   5   1 357.299 70.2343   1
   9  -5   1 499.388 83.9312   1
   9  -5  -1 296.826 74.3729   1
   9  -5  -2 1546.25 153.219   1
   9   5  -2 1609.69 169.817   1
   9  -5   2 1642.42 130.107   1
   9   5   2 1298.24 109.981   1
   9  -5  -3 1640.78 164.255   1
   9   5  -3 1439.54 160.123   1
   9  -5  -4 1546.84 173.711   1
   9   5  -4 1483.08 182.945   1
   9  -5  -5 2500.07 223.007   1
   9   5  -5 2382.01 223.532   1
   9  -5   6 18951.7 891.659   5
   9  -5   6 18307.4 931.270   2
   9  -5  -6 19909.1 648.984   1
   9   5  -6 19292.3 662.589   1
   9  -5   7 5778.76 531.645   2
   9   5   7 5608.98 490.116   2
   9  -5  -7 5810.87 367.473   1
   9   5  -7 5662.16 383.089   1
   9   5   8 7490.13 565.227   2
   9  -5  -8 8063.06 466.282   1
   9  -5   8 7313.31 638.902   2
   9   5  -8 7694.47 470.453   1
   9   5  -9 639.849 161.838   1
   9  -5   9 872.204 265.117   2
   9   5   9 523.815 198.996   2
   9  -5  -9 616.497 150.669   1
   9   5 -10 1203.60 233.698   1
   9  -5  10 1575.57 339.183   2
   9   5  10 1264.22 271.464   2
   9  -5 -10 1389.92 222.865   1
   9  -5  11 308.323 214.550   2
   9   5 -11 81.1957 125.764   1
   9   5  11 190.911 144.585   2
   9  -5 -11 133.698 115.467   1
   9  -5  12 299.869 197.965   2
   9   5 -12 369.436 156.143   1
   9   5  12 558.910 184.360   2
   9  -5 -12 291.246 143.062   1
   9  -5  13 1158.00 343.200   2
   9   5  13 565.472 266.177   2
   9  -5 -13 589.325 234.322   1
   9   5 -13 1147.46 226.510   1
   9  -5  14 5881.99 679.684   2
   9   5  14 3853.85 525.217   2
   9  -5  15-315.551 246.769   2
   9   5  15-54.7299 156.326   2
   9  -5  16 1648.97 389.113   2
   9   5  16 2123.52 403.109   2
   9  -5  17 1312.21 298.014   2
   9   5  17 1446.18 321.217   2
   9  -5  18 1881.36 371.844   2
   9   5  18 1218.03 289.612   2
  -9   5  18 1361.35 255.813   2
   9   5  19 542.405 198.361   2
  -9   5  19 662.404 175.639   2
   9  -7   0 315.399 76.2135   1
   9  -7  -1 12901.4 433.586   1
   9  -7   1 12864.7 419.952   1
   9   7  -2 951.004 144.107   1
   9  -7  -2 1088.43 148.437   1
   9   7   2 998.574 107.376   1
   9  -7   2 997.229 121.616   1
   9  -7  -3 2858.06 217.574   1
   9  -7   3 2336.39 173.780   1
   9   7  -3 3005.25 229.255   1
   9  -7  -4 1995.53 201.602   1
   9   7  -4 1996.04 209.139   1
   9  -7  -5 1492.31 173.271   1
   9   7  -5 1970.68 210.604   1
   9  -7   6 12222.7 739.341   5
   9  -7  -6 11467.6 503.923   1
   9  -7   6 12256.8 752.668   2
   9   7  -6 11495.2 527.509   1
   9  -7   7 21376.6 983.587   2
   9   7   7 20507.4 909.497   2
   9  -7  -7 19627.5 684.353   1
   9   7  -7 20144.6 727.990   1
   9   7   8 21993.6 972.665   2
   9  -7   8 23109.9 1075.14   2
   9  -7  -8 22168.6 779.532   1
   9   7  -8 23812.2 828.211   1
   9   7  -9 1682.07 253.098   1
   9  -7   9 1679.87 309.606   2
   9   7   9 1553.54 279.375   2
   9  -7  -9 1464.75 224.430   1
   9   7 -10 7884.11 533.815   1
   9  -7  10 7489.16 703.185   2
   9   7  10 7446.31 618.469   2
   9  -7 -10 7854.08 504.866   1
   9  -7  11 143.884 199.078   2
   9   7 -11 198.908 110.277   1
   9   7  11 20.6549 125.141   2
   9  -7 -11 172.313 114.635   1
   9  -7  12-248.165 252.711   2
   9   7 -12 150.677 120.219   1
   9   7  12-1.30053 172.566   2
   9  -7 -12 2.33264 95.1135   1
  -9   7  12 147.958 158.824   6
   9  -7  13 411.972 239.732   2
   9   7  13 264.202 200.508   2
   9   7 -13 668.052 209.994   1
   9  -7 -13 293.976 164.386   1
  -9   7  13 580.370 218.116   6
   9   7 -14 1510.29 310.054   3
   9  -7  14 1718.35 372.324   2
   9   7  14 1129.87 331.227   2
   9  -7  15 725.588 284.207   2
   9   7  15 710.780 239.443   2
   9   7  16 1900.76 349.751   2
   9  -7  16 2282.14 422.658   2
   9   7  17 4699.86 566.220   2
   9  -7  17 3676.48 535.423   2
   9  -7  18 1671.41 366.221   2
   9   7  18 1998.70 352.286   2
  -9   7  18 1737.77 283.292   2
  -9   7  19 2544.48 328.039   2
   9   7  19 2968.92 370.912   2
   9  -9   0 112.592 76.3536   1
   9  -9  -1 49390.5 904.421   1
   9  -9   1 46309.7 881.893   1
   9  -9   2 2965.78 224.016   1
   9  -9  -2 2870.75 237.529   1
   9  -9  -3 3898.69 266.575   1
   9  -9   3 3249.57 228.260   1
   9  -9  -4 709.037 132.170   1
   9   9  -5 1104.73 167.565   1
   9  -9  -5 1238.03 162.412   1
   9  -9   6 3110.10 370.905   5
   9  -9   6 2425.31 382.335   2
   9  -9  -6 2307.94 238.872   1
   9   9   6 2103.26 310.958   2
   9   9  -6 2434.96 264.603   1
   9  -9   7 5068.96 499.309   2
   9   9   7 4586.37 459.228   2
   9  -9  -7 4272.11 330.928   1
   9   9  -7 5146.57 384.933   1
   9  -9   8 49801.1 1587.80   2
   9   9   8 47729.6 1386.43   2
   9  -9  -8 48451.7 1146.75   1
   9   9  -8 47795.0 1219.56   1
   9   9   9 3077.37 387.017   2
   9  -9   9 2929.09 410.282   2
   9  -9  -9 2668.93 289.123   1
  -9   9   9 2565.89 356.319   6
   9   9  -9 2829.33 312.397   1
   9   9  10 9213.13 647.752   2
   9  -9 -10 8632.10 549.652   1
   9  -9  10 10213.2 808.455   2
  -9   9  10 8376.94 635.170   6
   9   9 -10 9871.08 612.512   1
   9  -9 -11 392.228 153.866   1
   9   9 -11 654.451 193.309   1
   9  -9  11 601.354 242.104   2
   9   9  11 585.592 241.953   2
  -9   9  11 608.706 191.166   6
   9  -9 -12 72.0291 147.434   1
   9  -9  12 522.241 308.621   2
   9   9 -12 37.3508 111.782   1
   9   9  12 219.140 196.883   2
  -9   9  12 209.745 125.740   6
   9   9 -13 2073.97 379.225   3
   9  -9  13 2450.51 456.452   2
   9   9  13 1358.17 343.227   2
  -9   9  13 2005.24 358.570   6
   9  -9  14 7897.52 769.441   2
  -9   9  14 6318.65 610.169   6
   9   9 -14 7638.29 652.799   3
   9   9  14 6190.96 615.352   2
   9  -9  15 959.980 343.297   2
   9   9  15 1489.62 351.572   2
   9   9  16 3486.92 468.167   2
   9  -9  16 3446.97 545.803   2
   9  -9  17 2516.55 414.321   2
   9   9  17 3045.37 432.297   2
   9   9  18 1442.40 280.288   2
  -9   9  18 1724.33 284.468   2
  -9   9  19 2097.78 304.801   2
   9   9  19 2704.42 355.255   2
   9 -11   0 341.658 94.5662   1
   9 -11   1 48618.1 967.849   1
   9 -11  -1 51280.5 985.080   1
   9 -11  -2 1246.09 169.521   1
   9 -11   2 944.342 150.416   1
   9 -11  -3 541.683 119.418   1
   9 -11   3 418.690 90.8164   1
   9  11  -4 37.3461 99.2103   3
   9 -11  -4 150.614 92.0567   1
   9 -11  -5 368.874 101.118   1
   9  11  -5 698.678 184.145   3
   9 -11   5 614.613 179.991   5
   9  11  -6 472.601 122.732   1
   9 -11  -6 603.126 137.213   1
   9  11  -6 433.349 128.716   3
   9 -11   6 541.160 175.333   5
   9  11   6 357.723 144.169   2
  -9  11   7 1866.05 272.937   6
   9  11  -7 2039.62 272.226   3
   9  11   7 2027.63 294.922   2
   9 -11  -7 2244.93 239.807   1
   9  11  -7 2381.93 268.958   1
   9 -11   7 2239.08 338.776   2
   9  11   8 6859.01 545.223   2
   9 -11   8 6055.47 624.017   2
   9 -11  -8 6702.96 446.652   1
  -9  11   8 5669.28 487.044   6
   9  11  -8 7003.40 484.305   1
   9  11  -8 6602.97 518.740   3
   9 -11  -9 1040.52 188.333   1
   9  11  -9 1032.01 230.525   3
   9  11  -9 1049.98 198.249   1
   9 -11   9 1415.85 325.730   2
   9  11   9 1110.89 247.464   2
  -9  11   9 963.245 215.549   6
   9  11 -10 1151.50 237.385   3
   9 -11 -10 1072.12 195.751   1
   9  11 -10 1018.99 206.394   1
   9 -11  10 1219.07 317.151   2
   9  11  10 1090.42 247.582   2
  -9  11  10 956.072 235.200   6
   9  11 -11 310.685 174.492   3
   9 -11 -11 531.095 165.035   1
   9 -11  11 331.415 214.840   2
   9  11 -11 696.832 198.190   1
   9  11  11 568.790 207.077   2
  -9  11  11 587.786 238.364   6
   9 -11  12 11502.1 911.578   2
   9  11 -12 9544.99 667.171   1
  -9  11  12 10745.7 757.471   6
   9  11  12 9974.55 715.484   2
   9 -11 -12 9218.70 666.066   1
   9  11 -12 12212.0 787.763   3
   9  11 -13 320.103 187.035   3
   9 -11  13 68.1247 227.580   2
  -9  11  13 192.960 131.702   6
   9 -11  14 2486.86 459.185   2
   9  11  14 2087.02 375.614   2
  -9  11  14 1953.73 356.882   6
   9 -11  15-69.9023 176.142   2
   9  11  15 67.3141 212.334   2
  -9  11  15 232.670 186.586   6
   9 -11  16 982.935 333.493   2
   9  11  16 681.204 221.485   2
   9  11  17 2710.41 402.297   2
   9  11  18 865.148 226.093   2
   9  11  19 1732.28 279.357   2
   9 -13   0 67.5374 76.1252   1
   9 -13   1 20289.5 684.440   1
   9 -13  -1 21660.7 680.247   1
   9 -13   2 2.84657 89.6162   1
   9 -13  -2 79.7252 60.6190   1
   9 -13   3 1564.74 207.403   1
   9 -13  -3 1469.38 205.050   5
   9 -13  -3 1717.47 201.965   1
   9  13  -3 1920.55 261.658   3
   9  13  -4 817.601 188.977   3
   9 -13  -4 711.593 139.272   1
   9 -13   5 2637.44 346.620   5
   9 -13  -5 2879.60 268.879   1
   9  13  -5 2907.09 329.734   3
  -9  13   6 383.502 249.070   6
   9  13  -6 335.827 150.225   3
   9 -13  -6 514.203 132.526   1
   9 -13   6 459.274 187.096   5
   9  13   6 523.653 180.393   2
   9  13  -7 361.894 135.492   1
   9  13  -7 220.621 131.012   3
   9 -13  -7 371.279 143.133   1
   9  13   7 99.5835 129.527   2
  -9  13   7 328.595 154.064   6
   9  13  -8 308.287 138.425   3
   9  13  -8 281.127 147.807   1
   9 -13  -8 243.205 96.9357   1
   9 -13   8 315.658 182.439   2
   9  13   8 358.637 177.798   2
  -9  13   8 405.393 155.992   6
   9  13  -9 561.749 184.426   3
   9  13  -9 210.008 112.813   1
   9 -13   9 447.159 226.202   2
  -9  13   9 571.906 209.770   6
   9 -13  -9 338.704 124.217   1
   9  13   9 390.914 160.978   2
   9  13 -10 123.756 112.216   3
   9 -13  10 517.813 243.869   2
   9 -13 -10 712.582 199.562   1
   9  13  10 181.133 192.286   2
   9  13 -10 195.791 100.696   1
  -9  13  10 254.692 202.779   6
   9  13 -11-0.41666 157.528   3
   9  13 -11-72.9110 125.454   1
   9 -13  11-35.7390 190.311   2
   9 -13 -11 6.67489 96.8552   1
   9  13  11-103.204 161.842   2
  -9  13  11 146.752 225.885   6
   9  13 -12 98.1397 126.349   3
   9 -13  12-57.2766 229.855   2
   9  13 -12 65.2448 127.366   1
   9 -13 -12 167.467 163.779   1
   9  13  12 178.750 145.878   2
  -9  13  12 20.0850 153.605   6
   9  13 -13 0.61074 141.158   3
   9 -13  13 236.151 237.135   2
  -9  13  13 441.735 263.881   6
   9  13  13 11.2786 137.089   2
   9 -13  14 386.854 203.049   2
   9  13  14 427.035 199.049   2
  -9  13  14 382.043 211.491   6
   9  13  15-21.2204 130.350   2
  -9  13  15 64.1295 151.499   6
   9  13  16-29.2704 132.122   2
   9  13  17-42.7628 130.954   2
   9  13  18-224.989 170.338   2
   9 -15   0-23.8723 75.5480   1
   9 -15  -1 3332.96 295.506   1
   9 -15   1 3478.09 319.023   1
   9  15  -1 3211.33 305.306   3
   9 -15   2 356.732 117.028   1
   9 -15  -2 130.992 73.6932   5
   9 -15  -2 417.999 120.136   1
   9  15  -2 374.069 134.687   3
   9 -15   3 13497.2 639.743   1
   9 -15  -3 13239.7 612.629   5
   9  15  -3 13312.7 625.374   3
   9 -15  -3 13945.3 594.872   1
  -9  15   4 5034.38 445.341   6
   9 -15   4 4950.90 450.780   5
   9 -15  -4 5955.41 397.057   1
   9  15  -4 6314.51 443.739   3
   9  15  -5 1777.05 258.036   3
  -9  15   5 1546.66 248.993   6
   9 -15   5 1315.52 259.127   5
   9  15   5 1755.69 262.201   4
   9 -15  -5 1684.77 213.209   1
   9 -15   6 5227.33 506.989   5
   9  15   6 3944.90 424.124   4
   9 -15  -6 5522.57 398.752   1
  -9  15   6 5039.87 457.470   6
   9  15  -6 5907.23 458.315   3
   9  15  -7 665.866 168.027   3
  -9  15   7 442.231 158.773   6
   9 -15  -7 886.841 159.846   1
   9  15   7 630.790 183.124   2
  -9  15   8 1414.03 269.514   6
   9  15  -8 1255.28 251.702   3
   9  15  -8 1458.94 231.460   1
   9 -15  -8 1292.63 216.856   1
   9  15   8 1219.59 266.423   2
   9  15  -9 514.813 146.931   1
   9 -15  -9 263.760 123.921   1
   9  15   9 547.982 200.306   2
   9  15  -9 225.332 127.115   3
  -9  15   9 629.809 220.089   6
   9  15 -10-39.4457 108.220   3
   9  15 -10-123.266 141.672   1
   9  15  10-205.939 178.985   2
  -9  15  10-68.9146 123.985   6
   9  15 -11 68.6269 133.977   3
   9  15 -11-98.2889 97.8930   1
   9 -15 -11 185.115 159.551   1
   9  15  11 77.1418 119.024   2
  -9  15  11 4.71646 150.067   6
   9  15  12 5946.95 567.059   2
  -9  15  12 7140.22 643.057   6
   9  15 -12 7582.90 628.389   3
   9  15  13 999.406 254.002   2
  -9  15  13 685.160 231.280   6
   9  15  14 4280.70 519.101   2
  -9  15  14 4113.09 483.988   6
   9  15  15 894.598 267.776   2
  -9  15  15 998.799 282.004   6
   9  15  16 661.318 226.531   2
   9  15  17 335.820 178.788   2
   9  15  18 161.705 153.943   2
   9 -17   0 287.436 108.052   5
   9 -17   0 417.666 141.027   1
   9 -17  -1 21646.2 810.438   1
   9 -17   1 16848.9 754.290   5
   9 -17  -1 18160.9 758.556   5
   9 -17   1 20352.5 839.319   1
   9  17  -2 1691.59 245.119   3
   9 -17   2 1511.32 236.377   5
   9 -17  -2 1502.09 227.345   5
   9 -17   2 1837.18 253.663   1
   9 -17  -2 1750.11 234.606   1
   9 -17  -3 17105.5 712.230   1
  -9  17   3 15505.5 782.369   6
   9 -17   3 12841.3 687.316   5
   9 -17  -3 15172.2 681.894   5
   9 -17   3 13517.4 723.001   1
   9  17  -3 15511.9 695.639   3
  -9  17   4 4967.91 483.100   6
   9  17  -4 4642.82 395.940   3
   9 -17  -4 4399.36 366.925   1
  -9  17   5 11444.7 687.859   6
   9  17   5 10161.6 621.240   4
   9  17  -5 11742.7 631.264   3
   9 -17  -5 11929.4 605.311   1
   9 -17   6 2007.75 326.377   5
   9  17   6 2364.27 333.042   4
   9  17  -6 2772.26 319.372   3
   9 -17  -6 2863.70 321.659   1
  -9  17   6 2778.52 350.077   6
   9  17   7 2408.31 322.448   4
   9  17  -7 2439.40 306.559   3
   9 -17  -7 2095.74 264.503   1
  -9  17   7 3119.24 373.016   6
   9  17  -8 2804.11 349.895   1
   9  17  -8 2839.98 359.463   3
   9 -17  -8 2598.53 318.897   1
  -9  17   8 3173.19 401.880   6
   9  17  -9 184.805 145.551   1
   9  17   9-3.69121 127.071   2
   9 -17  -9 44.8090 84.5401   1
   9  17  -9 147.112 123.834   3
  -9  17   9 48.7442 129.284   6
   9  17 -10 1598.40 265.760   1
   9  17  10 1921.62 337.317   2
   9 -17 -10 1817.20 292.061   1
  -9  17  10 1873.63 334.490   6
   9  17 -10 2042.17 311.368   3
   9  17  11 692.499 238.076   2
   9 -17 -11 447.507 197.116   1
   9  17 -11 502.245 199.957   1
  -9  17  11 357.102 196.861   6
   9  17 -11 611.864 197.902   3
   9  17  12 13577.4 857.416   2
  -9  17  12 15218.9 952.735   6
   9  17 -12 16552.1 924.651   3
   9  17  13 1093.70 287.467   2
  -9  17  13 868.451 268.263   6
   9  17  14 13744.6 893.012   2
  -9  17  14 13906.6 905.397   6
   9  17  15 2998.66 433.248   2
  -9  17  15 2946.08 407.978   6
   9  17  16 3537.23 448.483   2
  -9  17  16 2662.06 351.995   6
   9  17  17 226.158 148.545   2
  -9  17  18 38.2955 140.641   2
   9 -19   0 302.608 136.558   5
   9 -19   0 171.252 90.9352   1
   9 -19   1 10483.9 607.874   5
   9 -19  -1 11359.1 623.707   5
   9 -19  -1 13537.4 700.772   1
   9 -19   1 12826.7 709.936   1
   9 -19   2 2182.57 297.941   5
   9 -19  -2 2731.23 314.773   1
   9 -19  -2 2409.59 296.161   5
   9 -19   2 2888.12 346.039   1
  -9  19   3 8158.96 599.414   6
   9 -19   3 5772.34 477.566   5
   9 -19  -3 7420.56 503.364   1
   9 -19  -3 7279.13 493.116   5
   9 -19   3 7303.36 580.460   1
  -9  19   4 5757.82 506.017   6
   9 -19  -4 5219.17 417.048   1
   9 -19   4 4146.91 412.891   5
   9 -19  -4 5269.67 419.508   5
   9  19   4 5276.31 446.141   4
   9  19  -4 5753.44 458.029   3
   9 -19   5 7494.54 564.318   5
   9 -19  -5 9406.91 568.101   1
  -9  19   5 9760.15 652.077   6
   9  19   5 9861.58 645.232   4
   9  19  -5 9851.36 601.341   3
   9 -19  -6 4970.42 418.132   1
   9  19   6 5134.11 464.621   4
   9  19  -6 5037.43 450.755   3
  -9  19   6 5414.68 498.838   6
  -9  19   7 332.996 196.858   6
   9  19   7 243.384 122.029   4
   9 -19  -7 240.139 131.342   1
   9  19  -7 156.216 126.111   3
  -9  19   8 861.015 237.097   6
   9 -19  -8 658.775 179.679   1
   9  19  -8 760.992 184.850   3
   9  19  -9-59.7401 119.650   1
  -9  19   9 34.7101 128.620   6
   9 -19  -9 65.1825 113.502   1
   9  19  -9 144.008 139.422   3
   9  19 -10 552.491 183.968   1
   9  19  10 498.172 200.649   2
   9 -19 -10 610.772 208.311   1
   9  19 -10 1058.17 264.122   3
  -9  19  10 776.375 208.587   6
   9  19  11-127.650 142.085   2
   9  19 -11 36.0346 136.786   3
  -9  19  11 197.997 189.077   6
   9  19  12 8392.42 666.196   2
  -9  19  12 8725.77 719.848   6
   9  19  13 878.173 247.885   2
  -9  19  13 893.254 256.317   6
   9  19  14 7383.41 621.680   2
  -9  19  14 7049.18 628.713   6
   9  19  15 1837.46 321.020   2
  -9  19  15 1932.97 319.453   6
  -9  19  16 1319.97 269.411   6
   9  19  16 1076.58 252.010   2
   9  19  17 14.5972 150.725   2
   9 -19 -18-74.5304 77.8997   5
  -9  19  18-47.1379 100.184   2
   9 -21   0 206.570 155.716   1
   9 -21   0 228.028 125.235   5
   9 -21   1 113.431 117.677   5
   9 -21  -1-49.3092 85.9743   5
   9 -21   1-70.8738 93.3680   1
   9 -21  -1-23.4953 95.0524   1
   9 -21   2 830.061 242.649   1
   9 -21   2 368.594 175.674   5
   9 -21  -2 544.363 171.643   5
   9 -21  -2 725.643 181.247   1
  -9  21   3 336.270 201.168   6
   9 -21  -3 212.484 98.8977   1
   9 -21  -3 35.0146 106.919   5
   9 -21   3-101.040 176.815   1
   9 -21  -4 203.489 138.747   1
  -9  21   4 62.7717 143.558   6
   9 -21  -5 1767.09 282.708   1
  -9  21   5 1828.21 300.624   6
   9  21   5 2041.79 310.016   4
   9 -21  -6 7921.40 582.919   1
   9  21   6 8519.51 623.547   4
  -9  21   6 8471.04 634.495   6
  -9  21   7 1756.78 299.015   6
   9  21   7 2023.47 347.137   4
   9 -21  -7 1601.27 263.689   1
  -9  21   8 634.460 215.754   6
   9 -21  -8 839.762 207.374   1
  -9  21   9 182.177 196.494   6
   9  21  -9 72.8359 111.840   1
   9 -21  -9 250.677 182.969   1
   9 -21 -10 165.526 113.330   1
   9  21 -10 166.255 131.493   1
  -9  21  10 257.085 164.241   6
  -9  21  11 52.9945 156.870   6
  -9  21  12 2254.48 384.855   6
   9  21  13-62.7247 159.843   2
  -9  21  13 306.078 185.989   6
   9  21  14 1300.33 282.830   2
  -9  21  14 1655.26 311.112   6
   9  21  15 223.668 167.222   2
  -9  21  15 190.646 133.231   6
   9  21  16 192.270 147.668   2
  -9  21  16 37.8875 98.5122   6
   9 -23   0 102.534 107.360   5
   9 -23   0 357.765 202.253   1
   9 -23   1 14078.4 859.184   1
   9 -23  -1 12746.5 708.468   5
   9 -23  -1 14897.7 863.758   1
   9 -23  -2 555.420 187.760   1
  -9  23   2 1043.92 339.776   6
   9 -23  -2 294.703 130.753   5
   9 -23   2 754.350 244.389   1
   9 -23  -3 2695.79 371.091   1
  -9  23   3 2410.23 375.813   6
   9 -23  -3 2307.44 296.571   5
   9 -23   3 2166.54 376.290   1
   9  23   3 2422.72 314.302   4
  -9  23   4 1214.71 280.830   6
   9 -23  -4 809.639 217.512   1
   9 -23  -4 979.367 216.154   5
   9  23   4 550.038 158.734   4
  -9  23   5 58.8732 142.986   6
   9 -23  -5 59.9479 99.4149   1
   9 -23  -5 130.867 143.265   5
   9  23   5 43.7645 92.2625   4
  -9  23   6 443.108 208.326   6
   9 -23  -6 515.922 183.152   1
   9  23   6 631.380 199.888   4
  -9  23   7 455.909 207.481   6
   9 -23  -7 369.774 153.873   1
   9  23   7 242.385 139.413   4
  -9  23   8 557.544 222.055   6
   9 -23  -8 404.244 166.965   1
  -9  23   9 1921.71 365.600   6
   9  23  -9 1562.38 288.763   1
   9 -23  -9 1603.59 301.268   1
  -9  23  10 4626.50 529.523   6
  -9  23  11 57.2293 143.608   6
  -9  23  12 3305.95 445.737   6
  -9  23  13 229.974 186.545   6
  -9  23  14-18.9255 125.074   6
  -9  23  15 243.930 167.183   6
  -9  23  16 511.988 222.007   6
   9 -23 -17 1142.30 185.020   5
   9 -25   0 1700.74 339.554   1
   9 -25  -1 12059.7 707.282   5
   9 -25   1 14767.5 953.996   1
   9 -25  -1 14465.0 908.216   1
  -9  25   2 2216.74 370.341   6
   9 -25  -2 2209.23 351.443   1
   9 -25   2 2150.19 405.239   1
   9 -25  -2 2134.12 306.535   5
   9  25   2 2048.80 296.712   4
  -9  25   3 4397.15 498.802   6
   9 -25  -3 3957.56 401.898   5
   9 -25  -3 3955.20 457.236   1
   9  25   3 4120.26 418.699   4
  -9  25   4 1455.82 304.937   6
   9 -25  -4 1580.33 263.819   5
   9  25   4 1330.92 244.167   4
   9 -25  -4 1377.45 293.243   1
  -9  25   5 1382.40 288.972   6
   9 -25  -5 1355.51 247.427   5
   9 -25  -5 1224.88 265.915   1
   9  25   5 1178.65 254.760   4
  -9  25   6 1991.06 355.635   6
   9 -25  -6 1353.61 248.987   5
   9 -25  -6 1156.27 313.613   1
   9  25   6 1433.39 250.561   4
  -9  25   7 2048.21 347.450   6
   9 -25  -7 1374.70 301.968   1
   9 -25  -7 1649.57 288.021   5
   9  25   7 1615.91 312.723   4
  -9  25   8 1126.94 274.973   6
   9 -25  -8 1321.02 296.022   1
  -9  25   9 113.889 146.735   6
  -9  25  10 7033.90 651.813   6
  -9  25  11 1308.58 295.047   6
  -9  25  12 6099.79 604.395   6
  -9  25  13 190.281 162.433   6
  -9  25  14 1410.27 280.985   6
   9 -25 -15 368.405 139.782   5
  -9  25  15 452.466 188.496   6
   9 -25 -16 1821.92 245.897   5
  -9  25  16 823.940 235.600   6
   9 -27   0 1256.92 349.222   1
   9 -27  -1 10045.6 813.729   1
   9 -27   1 9722.69 865.411   1
   9  27   1 9857.93 628.025   4
  -9  27   2 1015.12 272.810   6
   9 -27   2 860.571 270.438   1
   9 -27  -2 1307.17 304.870   1
   9  27   2 1192.40 240.230   4
  -9  27   3 3644.53 472.640   6
   9 -27  -3 3371.39 358.670   5
   9  27   3 3746.90 404.649   4
   9 -27  -3 3514.89 476.414   1
   9 -27  -4 1453.14 305.213   1
  -9  27   4 1535.12 310.877   6
   9 -27  -4 1678.03 243.773   5
   9  27   4 1798.33 292.173   4
  -9  27   5 1381.06 311.374   6
   9 -27  -5 1085.47 258.237   1
   9 -27  -5 1029.80 220.416   5
   9  27   5 1115.91 222.442   4
   9 -27  -6 3627.14 467.117   5
   9 -27  -6 2954.20 434.354   1
   9  27   6 3812.03 433.809   4
  -9  27   6 4179.89 503.550   6
  -9  27   7 2550.09 408.292   6
   9 -27  -7 2829.95 349.243   5
   9  27   7 2659.11 396.694   4
   9 -27  -8 6941.34 562.098   5
  -9  27   8 6971.95 668.964   6
  -9  27   9 726.228 254.902   6
   9 -27  -9 666.989 199.753   5
  -9  27  10 6644.74 637.292   6
  -9  27  11 1048.40 268.288   6
  -9  27  12 809.753 265.177   6
  -9  27  13 468.674 204.387   6
   9 -27 -13 218.115 128.321   5
   9 -27 -14 1170.52 218.183   5
  -9  27  14 923.832 224.658   6
   9 -27 -15 445.929 115.965   5
  -9  27  15 460.815 168.143   6
   9 -29   0 659.502 298.619   1
   9  29   0 733.652 194.088   4
   9 -29   1-95.6280 216.488   1
  -9  29   1-124.125 148.217   6
   9 -29  -1-256.701 249.032   1
   9  29   1 260.243 123.222   4
   9 -29  -2 166.007 177.691   1
  -9  29   2 210.988 146.811   6
   9  29   2 65.0831 106.487   4
  -9  29   3 244.853 216.513   6
   9  29   3 158.335 122.993   4
   9 -29  -3-64.0164 191.690   1
  -9  29   4 591.188 215.712   6
   9 -29  -4 355.405 224.775   1
   9  29   4 223.786 145.330   4
  -9  29   5 990.081 261.555   6
   9 -29  -5 936.875 284.163   1
   9 -29  -5 1086.59 238.109   5
   9  29   5 1000.28 251.708   4
  -9  29   6 1541.14 323.256   6
   9 -29  -6 1561.20 271.060   5
   9  29   6 1630.85 314.540   4
  -9  29   7 3019.97 445.026   6
   9 -29  -7 2388.78 326.237   5
   9 -29  -8 3597.03 390.573   5
  -9  29   8 4077.00 534.168   6
  -9  29   9 2458.28 399.618   6
   9 -29  -9 2228.08 332.061   5
  -9  29  10 108.064 139.070   6
   9 -29 -10 403.848 155.038   5
   9 -29 -11 112.138 143.393   5
  -9  29  11 106.712 172.030   6
   9 -29 -12 206.067 145.007   5
  -9  29  12 29.2792 115.530   6
   9 -29 -13 200.911 192.626   5
  -9  29  13 154.397 209.425   6
   9 -29 -14-2.92854 77.3918   5
  -9  29  14 11.6333 96.5229   6
   9 -29 -15 37.9969 67.6040   5
   9  31   0 145.221 90.4294   4
   9 -31   0-44.4158 169.480   1
  -9  31   1 397.604 226.226   6
   9  31   1-247.619 172.741   4
   9  31  -1-7.45503 117.519   4
   9 -31  -1-99.2310 206.507   1
  -9  31   2 320.836 229.291   6
   9 -31  -2-55.8014 189.293   1
[truncated: 629,458 more chars]
