# Supplementary material
Source: publisher figshare collection journal article supplement (https://acs.figshare.com/ndownloader/files/16775912)
Supplement: Supplementary file 1 [file 16775912 › LIFM-114-Ethanol-solved.cif]

data_LIFM-114-Ethanol
_audit_creation_date              2017-12-04
_audit_creation_method
;
Olex2 1.2
(compiled 2017.08.10 svn.r3458 for OlexSys, GUI svn.r5381)
;
_shelx_SHELXL_version_number      '2014/7'
_publ_contact_author_address      ?
_publ_contact_author_email        ?
_publ_contact_author_id_orcid     ?
_publ_contact_author_name         ''
_publ_contact_author_phone        ?
_publ_section_references
;
Dolomanov, O.V., Bourhis, L.J., Gildea, R.J, Howard, J.A.K. & Puschmann, H.
 (2009), J. Appl. Cryst. 42, 339-341.

Sheldrick, G.M. (2015). Acta Cryst. C71, 3-8.
;
_chemical_name_common             LIFM-114-Ethanol
_chemical_name_systematic         ?
_chemical_formula_moiety          'C108 H64 O32 Zr6 [+ solvent]'
_chemical_formula_sum             'C108 H64 O32 Zr6'
_chemical_formula_weight          2420.91
_chemical_melting_point           ?
loop_
  _atom_type_symbol
  _atom_type_description
  _atom_type_scat_dispersion_real
  _atom_type_scat_dispersion_imag
  _atom_type_scat_source
 'C' 'C' 0.0181 0.0091 'International Tables Vol C Tables 4.2.6.8 and 6.1.1.4'
 'H' 'H' 0.0000 0.0000 'International Tables Vol C Tables 4.2.6.8 and 6.1.1.4'
 'O' 'O' 0.0492 0.0322 'International Tables Vol C Tables 4.2.6.8 and 6.1.1.4'
 'Zr' 'Zr' -0.1862 2.2449
 'International Tables Vol C Tables 4.2.6.8 and 6.1.1.4'

_shelx_space_group_comment
;
The symmetry employed for this shelxl refinement is uniquely defined
by the following loop, which should always be used as a source of
symmetry information in preference to the above space-group names.
They are only intended as comments.
;
_space_group_crystal_system       'orthorhombic'
_space_group_IT_number            63
_space_group_name_H-M_alt         'C m c m'
_space_group_name_Hall            '-C 2c 2'
loop_
  _space_group_symop_operation_xyz
 'x, y, z'
 '-x, -y, z+1/2'
 'x, -y, -z'
 '-x, y, -z+1/2'
 'x+1/2, y+1/2, z'
 '-x+1/2, -y+1/2, z+1/2'
 'x+1/2, -y+1/2, -z'
 '-x+1/2, y+1/2, -z+1/2'
 '-x, -y, -z'
 'x, y, -z-1/2'
 '-x, y, z'
 'x, -y, z-1/2'
 '-x+1/2, -y+1/2, -z'
 'x+1/2, y+1/2, -z-1/2'
 '-x+1/2, y+1/2, z'
 'x+1/2, -y+1/2, z-1/2'

_cell_length_a                    24.4853(11)
_cell_length_b                    42.1654(14)
_cell_length_c                    17.1403(6)
_cell_angle_alpha                 90
_cell_angle_beta                  90
_cell_angle_gamma                 90
_cell_volume                      17696.2(12)
_cell_formula_units_Z             4
_cell_measurement_reflns_used     6415
_cell_measurement_temperature     150(2)
_cell_measurement_theta_max       63.1830
_cell_measurement_theta_min       4.4370
_shelx_estimated_absorpt_T_max    ?
_shelx_estimated_absorpt_T_min    ?
_exptl_absorpt_coefficient_mu     3.193
_exptl_absorpt_correction_T_max   1.00000
_exptl_absorpt_correction_T_min   0.63770
_exptl_absorpt_correction_type    multi-scan
_exptl_absorpt_process_details
;
CrysAlisPro 1.171.38.43 (Rigaku Oxford Diffraction, 2015)
Empirical absorption correction using spherical harmonics,
 implemented in SCALE3 ABSPACK scaling algorithm.
;
_exptl_absorpt_special_details    ?
_exptl_crystal_colour             Colourless
_exptl_crystal_density_diffrn     0.909
_exptl_crystal_density_meas       ?
_exptl_crystal_density_method     ?
_exptl_crystal_description        Rod
_exptl_crystal_F_000              4832
_exptl_crystal_size_max           0.3
_exptl_crystal_size_mid           0.1
_exptl_crystal_size_min           0.1
_exptl_transmission_factor_max    ?
_exptl_transmission_factor_min    ?
_diffrn_reflns_av_R_equivalents   0.0586
_diffrn_reflns_av_unetI/netI      0.0487
_diffrn_reflns_Laue_measured_fraction_full 0.975
_diffrn_reflns_Laue_measured_fraction_max 0.975
_diffrn_reflns_limit_h_max        14
_diffrn_reflns_limit_h_min        -27
_diffrn_reflns_limit_k_max        48
_diffrn_reflns_limit_k_min        -36
_diffrn_reflns_limit_l_max        19
_diffrn_reflns_limit_l_min        -19
_diffrn_reflns_number             26316
_diffrn_reflns_point_group_measured_fraction_full 0.975
_diffrn_reflns_point_group_measured_fraction_max 0.975
_diffrn_reflns_theta_full         63.567
_diffrn_reflns_theta_max          63.567
_diffrn_reflns_theta_min          3.317
_diffrn_ambient_environment       N~2~
_diffrn_ambient_temperature       150(2)
_diffrn_detector                  'CCD plate'
_diffrn_detector_area_resol_mean  10.6525
_diffrn_detector_type             Atlas
_diffrn_measured_fraction_theta_full 0.975
_diffrn_measured_fraction_theta_max 0.975
_diffrn_measurement_details
;
List of Runs (angles in degrees, time in seconds):

  # Type    Start    End  Width  t~exp~   \w     \q     \k     \f   Frames
--------------------------------------------------------------------------
  1  \w   -110.00 -16.00   1.00   15.00    --  -40.77 -38.00 -60.00   94
  2  \w     62.00 128.00   1.00   15.00    --   40.77-178.00-180.00   66
  3  \w     66.00 158.00   1.00   60.00    --   86.42  77.00-120.00   92
  4  \w     15.00 118.00   1.00   60.00    --   86.42 -77.00 150.00  103
  5  \w     94.00 157.00   1.00   60.00    --   86.42 125.00-180.00   63
  6  \w     23.00  90.00   1.00   60.00    --   86.42-125.00  60.00   67
;
_diffrn_measurement_device        'four-circle diffractometer'
_diffrn_measurement_device_type   'SuperNova, Dual, Cu at zero, Atlas'
_diffrn_measurement_method        '\w scans'
_diffrn_orient_matrix_type
'CrysAlisPro convention (1999,Acta A55,543-557)'
_diffrn_orient_matrix_UB_11       0.0276925000
_diffrn_orient_matrix_UB_12       0.0328421000
_diffrn_orient_matrix_UB_13       0.0003161000
_diffrn_orient_matrix_UB_21       -0.0416914000
_diffrn_orient_matrix_UB_22       0.0119935000
_diffrn_orient_matrix_UB_23       -0.0603864000
_diffrn_orient_matrix_UB_31       -0.0380995000
_diffrn_orient_matrix_UB_32       0.0107200000
_diffrn_orient_matrix_UB_33       0.0665168000
_diffrn_radiation_monochromator   mirror
_diffrn_radiation_probe           x-ray
_diffrn_radiation_type            CuK\a
_diffrn_radiation_wavelength      1.54178
_diffrn_source                    'micro-focus sealed X-ray tube'
_diffrn_source_type               'SuperNova (Cu) X-ray Source'
_reflns_Friedel_coverage          0.000
_reflns_Friedel_fraction_full     .
_reflns_Friedel_fraction_max      .
_reflns_number_gt                 5200
_reflns_number_total              7543
_reflns_odcompleteness_completeness 99.62
_reflns_odcompleteness_iscentric  1
_reflns_odcompleteness_theta      59.94
_reflns_special_details
;
 Reflections were merged by SHELXL according to the crystal
 class for the calculation of statistics and refinement.
 
 Structure factors included contributions from the .fab file.
 
 _reflns_Friedel_fraction is defined as the number of unique
 Friedel pairs measured divided by the number that would be
 possible theoretically, ignoring centric projections and
 systematic absences.
;
_reflns_threshold_expression      'I > 2\s(I)'
_computing_cell_refinement        'CrysAlisPro 1.171.38.43 (Rigaku OD, 2015)'
_computing_data_collection        'CrysAlisPro 1.171.38.43 (Rigaku OD, 2015)'
_computing_data_reduction         'CrysAlisPro 1.171.38.43 (Rigaku OD, 2015)'
_computing_molecular_graphics     'Olex2 (Dolomanov et al., 2009)'
_computing_publication_material   'Olex2 (Dolomanov et al., 2009)'
_computing_structure_refinement   'ShelXL (Sheldrick, 2015)'
_computing_structure_solution     ?
_refine_diff_density_max          1.716
_refine_diff_density_min          -1.550
_refine_diff_density_rms          0.112
_refine_ls_extinction_coef        .
_refine_ls_extinction_method      none
_refine_ls_goodness_of_fit_ref    1.066
_refine_ls_hydrogen_treatment     constr
_refine_ls_matrix_type            full
_refine_ls_number_parameters      411
_refine_ls_number_reflns          7543
_refine_ls_number_restraints      172
_refine_ls_R_factor_all           0.0958
_refine_ls_R_factor_gt            0.0706
_refine_ls_restrained_S_all       1.106
_refine_ls_shift/su_max           0.001
_refine_ls_shift/su_mean          0.000
_refine_ls_structure_factor_coef  Fsqd
_refine_ls_weighting_details
'w=1/[\s^2^(Fo^2^)+(0.1034P)^2^+143.6003P] where P=(Fo^2^+2Fc^2^)/3'
_refine_ls_weighting_scheme       calc
_refine_ls_wR_factor_gt           0.1983
_refine_ls_wR_factor_ref          0.2197
_refine_special_details           ?
_olex2_refinement_description
;
1. Fixed Uiso
 At 1.2 times of:
  All C(H) groups
2. Restrained distances
 O3-O3_$1
 3.2 with sigma of 0.01
3. Rigid bond restraints
 O3, O4, C27
 with sigma for 1-2 distances of 0.01 and sigma for 1-3 distances of 0.01
 C15, C16, C17, C18, C19, C20, C16A, C17A, C19A, C20A
 with sigma for 1-2 distances of 0.01 and sigma for 1-3 distances of 0.01
4. Uiso/Uaniso restraints and constraints
O3 \\sim O4 \\sim C27: within 2A with sigma of 0.01 and sigma for terminal
atoms of 0.02
C15 \\sim C16 \\sim C17 \\sim C18 \\sim C19 \\sim C20 \\sim C16A \\sim C17A
\\sim C19A \\sim C20A: within 2A with sigma of 0.01 and sigma for terminal
atoms of 0.02
Uanis(C27) \\sim Ueq: with sigma of 0.001 and sigma for terminal atoms of 0.002
5. Others
 Fixed Sof: C9(0.5) H9(0.5) C10(0.5) H10(0.5) C12(0.5) H12(0.5) C13(0.5)
 H13(0.5) C16(0.5) H16(0.5) C17(0.5) H17(0.5) C19(0.5) H19(0.5) C20(0.5)
 H20(0.5) C9A(0.5) H9A(0.5) C10A(0.5) H10A(0.5) C12A(0.5) H12A(0.5) C13A(0.5)
 H13A(0.5) C16A(0.5) H16A(0.5) C17A(0.5) H17A(0.5) C19A(0.5) H19A(0.5)
 C20A(0.5) H20A(0.5)
6.a Aromatic/amide H refined with riding coordinates:
 C3(H3), C4(H4), C6(H6), C7(H7), C9(H9), C10(H10), C12(H12), C13(H13),
 C16(H16), C17(H17), C19(H19), C20(H20), C22(H22), C23(H23), C25(H25), C26(H26),
  C9A(H9A), C10A(H10A), C12A(H12A), C13A(H13A), C16A(H16A), C17A(H17A),
 C19A(H19A), C20A(H20A)
;
_atom_sites_solution_hydrogens    geom
_atom_sites_solution_primary      ?
_atom_sites_solution_secondary    ?
loop_
  _atom_site_label
  _atom_site_type_symbol
  _atom_site_fract_x
  _atom_site_fract_y
  _atom_site_fract_z
  _atom_site_U_iso_or_equiv
  _atom_site_adp_type
  _atom_site_occupancy
  _atom_site_site_symmetry_order
  _atom_site_calc_flag
  _atom_site_refinement_flags_posn
  _atom_site_refinement_flags_adp
  _atom_site_refinement_flags_occupancy
  _atom_site_disorder_assembly
  _atom_site_disorder_group
 Zr1 Zr 0.07236(2) 0.24334(2) 0.64700(3) 0.0374(2) Uani 1 1 d . . . . .
 Zr2 Zr 0.0000 0.30153(2) 0.7500 0.0309(3) Uani 1 4 d S T P . .
 Zr3 Zr 0.0000 0.18510(2) 0.7500 0.0319(3) Uani 1 4 d S T P . .
 O1 O 0.0981(2) 0.29136(11) 0.6015(3) 0.0634(15) Uani 1 1 d . . . . .
 O2 O 0.0542(2) 0.32838(10) 0.6717(3) 0.0442(12) Uani 1 1 d . . . . .
 O3 O 0.43982(15) 0.65878(10) 0.6721(3) 0.0531(13) Uani 1 1 d D U . . .
 O4 O 0.3974(2) 0.69501(11) 0.6081(3) 0.0614(14) Uani 1 1 d . U . . .
 O5 O 0.0675(3) 0.24214(12) 0.5185(3) 0.0668(16) Uani 1 1 d . . . . .
 O6 O 0.1621(2) 0.24417(13) 0.6521(4) 0.0725(17) Uani 1 1 d . . . . .
 O7 O 0.0000 0.26977(18) 0.6549(5) 0.066(2) Uani 1 2 d S T P . .
 O8 O 0.0789(4) 0.27387(16) 0.7500 0.063(2) Uani 1 2 d S T P . .
 O9 O 0.0000 0.21316(17) 0.6380(5) 0.065(2) Uani 1 2 d S T P . .
 O10 O 0.0666(3) 0.21667(16) 0.7500 0.059(2) Uani 1 2 d S T P . .
 C1 C 0.0843(3) 0.31934(18) 0.6168(5) 0.054(2) Uani 1 1 d . . . . .
 C2 C 0.1068(4) 0.34477(17) 0.5657(5) 0.061(2) Uani 1 1 d . . . . .
 C3 C 0.1483(4) 0.3392(2) 0.5132(6) 0.092(4) Uani 1 1 d . . . . .
 H3 H 0.1628 0.3184 0.5087 0.110 Uiso 1 1 calc R . . . .
 C4 C 0.1690(5) 0.3626(2) 0.4679(7) 0.096(4) Uani 1 1 d . . . . .
 H4 H 0.1981 0.3579 0.4329 0.116 Uiso 1 1 calc R . . . .
 C5 C 0.1485(4) 0.3931(2) 0.4718(5) 0.071(3) Uani 1 1 d . . . . .
 C6 C 0.1062(5) 0.3991(2) 0.5228(6) 0.094(4) Uani 1 1 d . . . . .
 H6 H 0.0906 0.4198 0.5251 0.112 Uiso 1 1 calc R . . . .
 C7 C 0.0861(4) 0.3752(2) 0.5712(6) 0.081(3) Uani 1 1 d . . . . .
 H7 H 0.0581 0.3798 0.6079 0.098 Uiso 1 1 calc R . . . .
 C8 C 0.1709(4) 0.4197(2) 0.4226(5) 0.070(3) Uani 1 1 d . . . . .
 C9 C 0.1565(11) 0.4510(5) 0.4384(13) 0.085(8) Uani 0.5 1 d . . . A 1
 H9 H 0.1311 0.4562 0.4784 0.102 Uiso 0.5 1 calc R . . A 1
 C10 C 0.1817(10) 0.4750(3) 0.3914(12) 0.075(6) Uani 0.5 1 d . . . A 1
 H10 H 0.1716 0.4964 0.4000 0.089 Uiso 0.5 1 calc R . . A 1
 C11 C 0.2191(4) 0.4687(2) 0.3355(5) 0.069(3) Uani 1 1 d . . . . .
 C12 C 0.2359(11) 0.4380(5) 0.3265(12) 0.083(7) Uani 0.5 1 d . . . A 1
 H12 H 0.2650 0.4331 0.2919 0.100 Uiso 0.5 1 calc R . . A 1
 C13 C 0.2101(11) 0.4138(4) 0.3686(12) 0.080(7) Uani 0.5 1 d . . . A 1
 H13 H 0.2204 0.3924 0.3589 0.096 Uiso 0.5 1 calc R . . A 1
 C14 C 0.2441(4) 0.49499(18) 0.2895(4) 0.071(3) Uani 1 1 d . . . . .
 C15 C 0.2706(4) 0.5202(2) 0.3379(5) 0.070(2) Uani 1 1 d . U . . .
 C16 C 0.2424(10) 0.5367(4) 0.3900(11) 0.084(3) Uani 0.5 1 d . U . B 1
 H16 H 0.2047 0.5321 0.3976 0.101 Uiso 0.5 1 calc R . . B 1
 C17 C 0.2670(9) 0.5607(5) 0.4341(11) 0.086(3) Uani 0.5 1 d . U . B 1
 H17 H 0.2451 0.5720 0.4705 0.103 Uiso 0.5 1 calc R . . B 1
 C18 C 0.3200(4) 0.5686(2) 0.4277(5) 0.075(2) Uani 1 1 d . U . . .
 C19 C 0.3524(9) 0.5481(4) 0.3816(10) 0.078(3) Uani 0.5 1 d . U . B 1
 H19 H 0.3911 0.5497 0.3824 0.093 Uiso 0.5 1 calc R . . B 1
 C20 C 0.3260(9) 0.5252(4) 0.3340(11) 0.079(3) Uani 0.5 1 d . U . B 1
 H20 H 0.3472 0.5131 0.2986 0.094 Uiso 0.5 1 calc R . . B 1
 C21 C 0.3439(4) 0.59400(19) 0.4760(5) 0.069(3) Uani 1 1 d . . . . .
 C22 C 0.3219(5) 0.6239(3) 0.4773(7) 0.107(4) Uani 1 1 d . . . . .
 H22 H 0.2910 0.6283 0.4457 0.129 Uiso 1 1 calc R . . . .
 C23 C 0.3434(5) 0.6478(2) 0.5232(7) 0.096(4) Uani 1 1 d . . . . .
 H23 H 0.3277 0.6684 0.5223 0.115 Uiso 1 1 calc R . . . .
 C24 C 0.3879(4) 0.64153(18) 0.5705(5) 0.062(2) Uani 1 1 d . . . . .
 C25 C 0.4104(4) 0.61190(19) 0.5689(6) 0.080(3) Uani 1 1 d . . . . .
 H25 H 0.4414 0.6075 0.6004 0.096 Uiso 1 1 calc R . . . .
 C26 C 0.3890(5) 0.5881(2) 0.5224(6) 0.095(4) Uani 1 1 d . . . . .
 H26 H 0.4053 0.5677 0.5223 0.113 Uiso 1 1 calc R . . . .
 C27 C 0.4119(3) 0.66696(17) 0.6206(4) 0.0459(16) Uani 1 1 d . U . . .
 C9A C 0.1411(10) 0.4406(6) 0.3837(16) 0.096(8) Uani 0.5 1 d . . . A 2
 H9A H 0.1025 0.4397 0.3883 0.115 Uiso 0.5 1 calc R . . A 2
 C10A C 0.1646(9) 0.4642(5) 0.3355(15) 0.087(7) Uani 0.5 1 d . . . A 2
 H10A H 0.1420 0.4769 0.3031 0.105 Uiso 0.5 1 calc R . . A 2
 C12A C 0.2504(12) 0.4497(8) 0.3800(18) 0.145(15) Uani 0.5 1 d . . . A 2
 H12A H 0.2884 0.4539 0.3841 0.174 Uiso 0.5 1 calc R . . A 2
 C13A C 0.2277(12) 0.4235(8) 0.4210(19) 0.142(14) Uani 0.5 1 d . . . A 2
 H13A H 0.2508 0.4088 0.4469 0.170 Uiso 0.5 1 calc R . . A 2
 C16A C 0.2598(9) 0.5531(4) 0.3210(11) 0.081(3) Uani 0.5 1 d . U . B 2
 H16A H 0.2354 0.5584 0.2800 0.097 Uiso 0.5 1 calc R . . B 2
 C17A C 0.2841(9) 0.5766(4) 0.3630(11) 0.081(3) Uani 0.5 1 d . U . B 2
 H17A H 0.2777 0.5982 0.3500 0.097 Uiso 0.5 1 calc R . . B 2
 C19A C 0.3260(9) 0.5379(4) 0.4440(11) 0.078(3) Uani 0.5 1 d . U . B 2
 H19A H 0.3484 0.5321 0.4870 0.094 Uiso 0.5 1 calc R . . B 2
 C20A C 0.3011(9) 0.5142(4) 0.4012(10) 0.076(3) Uani 0.5 1 d . U . B 2
 H20A H 0.3057 0.4928 0.4173 0.092 Uiso 0.5 1 calc R . . B 2

loop_
  _atom_site_aniso_label
  _atom_site_aniso_U_11
  _atom_site_aniso_U_22
  _atom_site_aniso_U_33
  _atom_site_aniso_U_23
  _atom_site_aniso_U_13
  _atom_site_aniso_U_12
 Zr1 0.0594(4) 0.0197(3) 0.0330(3) 0.0002(2) 0.0111(2) 0.0002(2)
 Zr2 0.0549(7) 0.0117(5) 0.0262(5) 0.000 0.000 0.000
 Zr3 0.0580(7) 0.0147(5) 0.0230(5) 0.000 0.000 0.000
 O1 0.101(4) 0.026(3) 0.063(3) 0.005(2) 0.038(3) -0.004(3)
 O2 0.071(3) 0.020(2) 0.042(3) 0.0017(19) 0.013(2) -0.002(2)
 O3 0.090(4) 0.025(2) 0.044(3) -0.004(2) -0.004(3) -0.016(2)
 O4 0.089(4) 0.032(3) 0.063(3) -0.006(2) -0.031(3) -0.003(2)
 O5 0.115(5) 0.042(3) 0.043(3) 0.000(2) 0.024(3) -0.005(3)
 O6 0.073(4) 0.046(3) 0.099(5) -0.005(3) 0.028(3) 0.002(3)
 O7 0.056(4) 0.044(4) 0.098(6) -0.034(4) 0.000 0.000
 O8 0.123(7) 0.032(4) 0.035(4) 0.000 0.000 0.022(4)
 O9 0.067(5) 0.033(4) 0.095(6) 0.042(4) 0.000 0.000
 O10 0.107(6) 0.028(4) 0.041(4) 0.000 0.000 -0.023(4)
 C1 0.072(5) 0.039(4) 0.052(5) 0.006(4) 0.019(4) -0.003(4)
 C2 0.087(6) 0.032(4) 0.063(5) 0.011(4) 0.022(5) -0.013(4)
 C3 0.122(8) 0.044(5) 0.110(8) 0.019(5) 0.063(7) -0.005(5)
 C4 0.135(9) 0.048(5) 0.106(8) 0.022(5) 0.062(7) -0.008(6)
 C5 0.108(7) 0.045(5) 0.060(5) 0.013(4) 0.009(5) -0.031(5)
 C6 0.146(10) 0.040(5) 0.096(8) 0.019(5) 0.055(7) -0.005(5)
 C7 0.107(8) 0.050(5) 0.087(7) 0.021(5) 0.036(6) -0.001(5)
 C8 0.116(8) 0.047(5) 0.048(5) 0.009(4) 0.013(5) -0.038(5)
 C9 0.15(2) 0.047(11) 0.060(12) 0.011(10) 0.039(14) -0.007(12)
 C10 0.139(19) 0.015(7) 0.069(12) 0.004(8) 0.014(13) -0.024(9)
 C11 0.123(8) 0.052(5) 0.033(4) -0.002(4) -0.004(5) -0.051(5)
 C12 0.130(19) 0.063(13) 0.057(12) 0.002(10) 0.051(13) -0.032(12)
 C13 0.14(2) 0.025(8) 0.074(13) 0.009(9) 0.047(14) -0.021(10)
 C14 0.136(8) 0.044(4) 0.034(4) 0.004(3) -0.006(5) -0.056(5)
 C15 0.119(5) 0.050(4) 0.042(3) -0.010(3) -0.002(4) -0.049(4)
 C16 0.124(6) 0.064(5) 0.065(5) -0.024(5) -0.002(5) -0.043(5)
 C17 0.127(6) 0.064(5) 0.066(5) -0.026(4) -0.005(5) -0.039(5)
 C18 0.121(5) 0.053(4) 0.052(4) -0.019(3) -0.007(4) -0.037(4)
 C19 0.120(6) 0.054(5) 0.060(5) -0.023(4) -0.009(5) -0.037(5)
 C20 0.121(6) 0.055(5) 0.060(5) -0.020(4) -0.005(5) -0.038(5)
 C21 0.112(7) 0.040(5) 0.055(5) -0.006(4) -0.017(5) -0.031(5)
 C22 0.113(9) 0.082(8) 0.126(10) -0.044(7) -0.057(8) -0.003(6)
 C23 0.115(8) 0.059(6) 0.113(9) -0.042(6) -0.048(7) 0.003(6)
 C24 0.101(7) 0.034(4) 0.051(5) -0.004(3) -0.011(5) -0.011(4)
 C25 0.113(8) 0.038(5) 0.090(7) -0.015(5) -0.045(6) -0.001(5)
 C26 0.150(10) 0.039(5) 0.094(8) -0.027(5) -0.042(7) -0.010(6)
 C27 0.0483(18) 0.0438(18) 0.0456(18) -0.0008(10) -0.0015(10) -0.0015(10)
 C9A 0.088(15) 0.082(16) 0.12(2) 0.065(16) 0.046(16) 0.010(13)
 C10A 0.097(16) 0.057(12) 0.108(18) 0.035(12) 0.019(14) -0.030(11)
 C12A 0.12(2) 0.18(3) 0.13(2) 0.12(2) -0.069(19) -0.10(2)
 C13A 0.13(2) 0.16(3) 0.14(3) 0.10(2) -0.05(2) -0.08(2)
 C16A 0.129(6) 0.052(5) 0.062(5) -0.012(4) -0.014(5) -0.041(5)
 C17A 0.130(7) 0.050(5) 0.063(6) -0.014(5) -0.016(5) -0.037(5)
 C19A 0.123(6) 0.055(4) 0.058(5) -0.018(4) -0.012(5) -0.034(5)
 C20A 0.121(6) 0.053(5) 0.055(5) -0.016(4) -0.009(5) -0.038(5)

_geom_special_details
;
 All esds (except the esd in the dihedral angle between two l.s. planes)
 are estimated using the full covariance matrix.  The cell esds are taken
 into account individually in the estimation of esds in distances, angles
 and torsion angles; correlations between esds in cell parameters are only
 used when they are defined by crystal symmetry.  An approximate (isotropic)
 treatment of cell esds is used for estimating esds involving l.s. planes.
;
loop_
  _geom_bond_atom_site_label_1
  _geom_bond_atom_site_label_2
  _geom_bond_distance
  _geom_bond_site_symmetry_2
  _geom_bond_publ_flag
 Zr1 Zr1 3.5309(11) 10_557 ?
 Zr1 Zr1 3.5433(12) 11 ?
 Zr1 Zr2 3.5038(8) . ?
 Zr1 Zr3 3.5051(8) . ?
 Zr1 O1 2.259(5) . ?
 Zr1 O4 2.269(5) 15_545 ?
 Zr1 O5 2.207(5) . ?
 Zr1 O6 2.198(6) . ?
 Zr1 O7 2.097(4) . ?
 Zr1 O8 2.191(4) . ?
 Zr1 O9 2.187(4) . ?
 Zr1 O10 2.098(4) . ?
 Zr2 Zr1 3.5038(8) 11 ?
 Zr2 Zr1 3.5038(8) 10_557 ?
 Zr2 Zr1 3.5038(8) 4_556 ?
 Zr2 O2 2.201(4) 10_557 ?
 Zr2 O2 2.201(4) . ?
 Zr2 O2 2.201(4) 11 ?
 Zr2 O2 2.201(4) 4_556 ?
 Zr2 O7 2.110(7) . ?
 Zr2 O7 2.110(7) 10_557 ?
 Zr2 O8 2.256(8) 11 ?
 Zr2 O8 2.256(8) . ?
 Zr3 Zr1 3.5051(8) 11 ?
 Zr3 Zr1 3.5051(8) 10_557 ?
 Zr3 Zr1 3.5051(8) 4_556 ?
 Zr3 O3 2.278(4) 5_445 ?
 Zr3 O3 2.278(4) 15_545 ?
 Zr3 O3 2.278(4) 14_447 ?
 Zr3 O3 2.278(4) 8_546 ?
 Zr3 O9 2.255(7) . ?
 Zr3 O9 2.255(7) 10_557 ?
 Zr3 O10 2.105(7) 11 ?
 Zr3 O10 2.105(7) . ?
 O1 C1 1.255(9) . ?
 O2 C1 1.256(9) . ?
 O3 Zr3 2.278(4) 5 ?
 O3 C27 1.169(8) . ?
 O4 Zr1 2.269(5) 15 ?
 O4 C27 1.253(9) . ?
 O7 Zr1 2.097(4) 11 ?
 O8 Zr1 2.191(4) 10_557 ?
 O9 Zr1 2.187(4) 11 ?
 O10 Zr1 2.098(4) 10_557 ?
 C1 C2 1.490(10) . ?
 C2 C3 1.376(12) . ?
 C2 C7 1.383(12) . ?
 C3 C4 1.353(12) . ?
 C4 C5 1.382(13) . ?
 C5 C6 1.382(13) . ?
 C5 C8 1.507(10) . ?
 C6 C7 1.396(12) . ?
 C8 C9 1.39(2) . ?
 C8 C13 1.36(2) . ?
 C8 C9A 1.32(2) . ?
 C8 C13A 1.40(3) . ?
 C9 C10 1.43(3) . ?
 C10 C11 1.35(2) . ?
 C11 C12 1.37(2) . ?
 C11 C14 1.491(10) . ?
 C11 C10A 1.35(2) . ?
 C11 C12A 1.35(3) . ?
 C12 C13 1.40(2) . ?
 C14 C14 1.355(15) 10_556 ?
 C14 C15 1.497(10) . ?
 C15 C16 1.33(2) . ?
 C15 C20 1.37(2) . ?
 C15 C16A 1.44(2) . ?
 C15 C20A 1.34(2) . ?
 C16 C17 1.40(2) . ?
 C17 C18 1.34(2) . ?
 C18 C19 1.41(2) . ?
 C18 C21 1.475(10) . ?
 C18 C17A 1.45(2) . ?
 C18 C19A 1.33(2) . ?
 C19 C20 1.42(2) . ?
 C21 C22 1.370(14) . ?
 C21 C26 1.383(13) . ?
 C22 C23 1.385(12) . ?
 C23 C24 1.384(12) . ?
 C24 C25 1.366(12) . ?
 C24 C27 1.494(10) . ?
 C25 C26 1.385(11) . ?
 C9A C10A 1.42(2) . ?
 C12A C13A 1.42(3) . ?
 C16A C17A 1.36(2) . ?
 C19A C20A 1.38(2) . ?

loop_
  _geom_angle_atom_site_label_1
  _geom_angle_atom_site_label_2
  _geom_angle_atom_site_label_3
  _geom_angle
  _geom_angle_site_symmetry_1
  _geom_angle_site_symmetry_3
  _geom_angle_publ_flag
 Zr1 Zr1 Zr1 90.0 10_557 11 ?
 Zr2 Zr1 Zr1 59.626(12) . 11 ?
 Zr2 Zr1 Zr1 59.743(11) . 10_557 ?
 Zr2 Zr1 Zr3 88.927(19) . . ?
 Zr3 Zr1 Zr1 59.639(12) . 11 ?
 Zr3 Zr1 Zr1 59.756(11) . 10_557 ?
 O1 Zr1 Zr1 110.20(14) . 10_557 ?
 O1 Zr1 Zr1 106.17(16) . 11 ?
 O1 Zr1 Zr2 71.77(13) . . ?
 O1 Zr1 Zr3 160.49(13) . . ?
 O1 Zr1 O4 127.76(18) . 15_545 ?
 O4 Zr1 Zr1 107.10(14) 15_545 10_557 ?
 O4 Zr1 Zr1 109.07(15) 15_545 11 ?
 O4 Zr1 Zr2 160.46(13) 15_545 . ?
 O4 Zr1 Zr3 71.58(13) 15_545 . ?
 O5 Zr1 Zr1 176.63(16) . 10_557 ?
 O5 Zr1 Zr1 86.90(17) . 11 ?
 O5 Zr1 Zr2 119.46(15) . . ?
 O5 Zr1 Zr3 117.35(15) . . ?
 O5 Zr1 O1 72.0(2) . . ?
 O5 Zr1 O4 72.8(2) . 15_545 ?
 O6 Zr1 Zr1 177.52(17) . 11 ?
 O6 Zr1 Zr1 87.70(17) . 10_557 ?
 O6 Zr1 Zr2 118.28(15) . . ?
 O6 Zr1 Zr3 119.73(16) . . ?
 O6 Zr1 O1 73.8(2) . . ?
 O6 Zr1 O4 72.5(2) . 15_545 ?
 O6 Zr1 O5 95.4(2) . . ?
 O7 Zr1 Zr1 86.3(2) . 10_557 ?
 O7 Zr1 Zr1 32.36(17) . 11 ?
 O7 Zr1 Zr2 33.7(2) . . ?
 O7 Zr1 Zr3 85.0(2) . . ?
 O7 Zr1 O1 77.4(3) . . ?
 O7 Zr1 O4 140.5(2) . 15_545 ?
 O7 Zr1 O5 91.8(3) . . ?
 O7 Zr1 O6 146.4(2) . . ?
 O7 Zr1 O8 72.4(3) . . ?
 O7 Zr1 O9 68.2(2) . . ?
 O7 Zr1 O10 100.0(3) . . ?
 O8 Zr1 Zr1 94.2(2) . 11 ?
 O8 Zr1 Zr1 36.31(15) . 10_557 ?
 O8 Zr1 Zr2 38.7(2) . . ?
 O8 Zr1 Zr3 92.44(18) . . ?
 O8 Zr1 O1 74.4(2) . . ?
 O8 Zr1 O4 137.8(2) . 15_545 ?
 O8 Zr1 O5 145.3(2) . . ?
 O8 Zr1 O6 83.4(3) . . ?
 O9 Zr1 Zr1 35.88(16) . 11 ?
 O9 Zr1 Zr1 94.0(2) . 10_557 ?
 O9 Zr1 Zr2 91.9(2) . . ?
 O9 Zr1 Zr3 38.57(19) . . ?
 O9 Zr1 O1 136.3(2) . . ?
 O9 Zr1 O4 73.8(2) . 15_545 ?
 O9 Zr1 O5 82.7(3) . . ?
 O9 Zr1 O6 145.2(2) . . ?
 O9 Zr1 O8 117.2(3) . . ?
 O10 Zr1 Zr1 86.1(2) . 11 ?
 O10 Zr1 Zr1 32.70(15) . 10_557 ?
 O10 Zr1 Zr2 85.26(19) . . ?
 O10 Zr1 Zr3 33.55(19) . . ?
 O10 Zr1 O1 142.2(2) . . ?
 O10 Zr1 O4 77.8(2) . 15_545 ?
 O10 Zr1 O5 145.5(2) . . ?
 O10 Zr1 O6 92.4(3) . . ?
 O10 Zr1 O8 69.0(2) . . ?
 O10 Zr1 O9 72.1(3) . . ?
 Zr1 Zr2 Zr1 60.51(2) 10_557 . ?
 Zr1 Zr2 Zr1 60.51(2) 11 4_556 ?
 Zr1 Zr2 Zr1 91.09(3) 11 10_557 ?
 Zr1 Zr2 Zr1 60.75(2) 4_556 10_557 ?
 Zr1 Zr2 Zr1 91.10(3) 4_556 . ?
 Zr1 Zr2 Zr1 60.75(2) 11 . ?
 O2 Zr2 Zr1 166.51(12) 4_556 . ?
 O2 Zr2 Zr1 111.28(12) . 10_557 ?
 O2 Zr2 Zr1 75.42(11) . . ?
 O2 Zr2 Zr1 110.97(12) . 11 ?
 O2 Zr2 Zr1 166.50(12) 11 10_557 ?
 O2 Zr2 Zr1 166.50(12) 10_557 11 ?
 O2 Zr2 Zr1 110.96(12) 11 . ?
 O2 Zr2 Zr1 75.42(11) 11 11 ?
 O2 Zr2 Zr1 75.42(11) 10_557 10_557 ?
 O2 Zr2 Zr1 111.27(12) 4_556 11 ?
 O2 Zr2 Zr1 110.96(12) 4_556 10_557 ?
 O2 Zr2 Zr1 166.51(12) . 4_556 ?
 O2 Zr2 Zr1 111.27(12) 10_557 . ?
 O2 Zr2 Zr1 111.27(12) 11 4_556 ?
 O2 Zr2 Zr1 75.42(11) 4_556 4_556 ?
 O2 Zr2 Zr1 110.96(12) 10_557 4_556 ?
 O2 Zr2 O2 118.1(2) 10_557 11 ?
 O2 Zr2 O2 74.1(3) . 11 ?
 O2 Zr2 O2 75.2(2) 11 4_556 ?
 O2 Zr2 O2 75.2(2) . 10_557 ?
 O2 Zr2 O2 74.1(3) 10_557 4_556 ?
 O2 Zr2 O2 118.1(2) . 4_556 ?
 O2 Zr2 O8 141.44(13) 11 . ?
 O2 Zr2 O8 75.5(2) 4_556 11 ?
 O2 Zr2 O8 141.44(13) . 11 ?
 O2 Zr2 O8 141.44(13) 10_557 11 ?
 O2 Zr2 O8 75.5(2) . . ?
 O2 Zr2 O8 75.5(2) 10_557 . ?
 O2 Zr2 O8 141.44(13) 4_556 . ?
 O2 Zr2 O8 75.5(2) 11 11 ?
 O7 Zr2 Zr1 86.8(2) . 10_557 ?
 O7 Zr2 Zr1 86.8(2) 10_557 . ?
 O7 Zr2 Zr1 33.50(10) 10_557 4_556 ?
 O7 Zr2 Zr1 33.50(10) 10_557 10_557 ?
 O7 Zr2 Zr1 86.8(2) . 4_556 ?
 O7 Zr2 Zr1 33.50(10) . 11 ?
 O7 Zr2 Zr1 33.50(10) . . ?
 O7 Zr2 Zr1 86.8(2) 10_557 11 ?
 O7 Zr2 O2 142.92(13) . 4_556 ?
 O7 Zr2 O2 81.7(2) . 11 ?
 O7 Zr2 O2 142.92(13) . 10_557 ?
 O7 Zr2 O2 81.7(2) . . ?
 O7 Zr2 O2 81.7(2) 10_557 4_556 ?
 O7 Zr2 O2 142.93(13) 10_557 . ?
 O7 Zr2 O2 142.92(13) 10_557 11 ?
 O7 Zr2 O2 81.7(2) 10_557 10_557 ?
 O7 Zr2 O7 101.2(5) . 10_557 ?
 O7 Zr2 O8 70.85(16) 10_557 11 ?
 O7 Zr2 O8 70.85(16) 10_557 . ?
 O7 Zr2 O8 70.85(16) . . ?
 O7 Zr2 O8 70.85(16) . 11 ?
 O8 Zr2 Zr1 37.36(12) 11 4_556 ?
 O8 Zr2 Zr1 37.36(12) . . ?
 O8 Zr2 Zr1 94.06(18) . 4_556 ?
 O8 Zr2 Zr1 94.06(18) . 11 ?
 O8 Zr2 Zr1 94.06(18) 11 . ?
 O8 Zr2 Zr1 37.36(12) . 10_557 ?
 O8 Zr2 Zr1 94.06(18) 11 10_557 ?
 O8 Zr2 Zr1 37.36(12) 11 11 ?
 O8 Zr2 O8 117.7(4) . 11 ?
 Zr1 Zr3 Zr1 91.05(3) 10_557 11 ?
 Zr1 Zr3 Zr1 60.72(2) 10_557 4_556 ?
 Zr1 Zr3 Zr1 60.49(2) 4_556 11 ?
 Zr1 Zr3 Zr1 60.72(2) 11 . ?
 Zr1 Zr3 Zr1 60.49(2) 10_557 . ?
 Zr1 Zr3 Zr1 91.05(3) 4_556 . ?
 O3 Zr3 Zr1 73.68(12) 14_447 4_556 ?
 O3 Zr3 Zr1 108.05(11) 5_445 4_556 ?
 O3 Zr3 Zr1 73.68(12) 15_545 . ?
 O3 Zr3 Zr1 164.54(12) 15_545 4_556 ?
 O3 Zr3 Zr1 108.05(11) 8_546 . ?
 O3 Zr3 Zr1 111.90(12) 14_447 10_557 ?
 O3 Zr3 Zr1 108.05(11) 15_545 10_557 ?
 O3 Zr3 Zr1 73.68(12) 5_445 11 ?
 O3 Zr3 Zr1 111.90(12) 5_445 . ?
 O3 Zr3 Zr1 164.54(12) 8_546 11 ?
 O3 Zr3 Zr1 164.54(12) 14_447 . ?
 O3 Zr3 Zr1 108.05(11) 14_447 11 ?
 O3 Zr3 Zr1 164.54(12) 5_445 10_557 ?
 O3 Zr3 Zr1 111.90(12) 15_545 11 ?
 O3 Zr3 Zr1 111.90(12) 8_546 4_556 ?
 O3 Zr3 Zr1 73.68(12) 8_546 10_557 ?
 O3 Zr3 O3 71.8(2) 5_445 14_447 ?
 O3 Zr3 O3 121.7(2) 5_445 8_546 ?
 O3 Zr3 O3 71.8(2) 8_546 15_545 ?
 O3 Zr3 O3 80.6(2) 8_546 14_447 ?
 O3 Zr3 O3 80.6(2) 5_445 15_545 ?
 O3 Zr3 O3 121.7(2) 14_447 15_545 ?
 O9 Zr3 Zr1 37.21(12) 10_557 4_556 ?
 O9 Zr3 Zr1 37.21(12) . 11 ?
 O9 Zr3 Zr1 93.50(19) 10_557 11 ?
 O9 Zr3 Zr1 37.21(12) 10_557 10_557 ?
 O9 Zr3 Zr1 93.50(19) . 4_556 ?
 O9 Zr3 Zr1 37.21(12) . . ?
 O9 Zr3 Zr1 93.50(19) 10_557 . ?
 O9 Zr3 Zr1 93.50(19) . 10_557 ?
 O9 Zr3 O3 75.9(2) . 5_445 ?
 O9 Zr3 O3 75.9(2) 10_557 14_447 ?
 O9 Zr3 O3 139.02(11) 10_557 15_545 ?
 O9 Zr3 O3 139.02(11) . 8_546 ?
 O9 Zr3 O3 75.9(2) . 15_545 ?
 O9 Zr3 O3 75.9(2) 10_557 8_546 ?
 O9 Zr3 O3 139.02(11) . 14_447 ?
 O9 Zr3 O3 139.02(11) 10_557 5_445 ?
 O9 Zr3 O9 116.7(4) . 10_557 ?
 O10 Zr3 Zr1 33.43(9) 11 11 ?
 O10 Zr3 Zr1 33.43(9) 11 4_556 ?
 O10 Zr3 Zr1 87.05(19) 11 . ?
 O10 Zr3 Zr1 87.04(19) . 11 ?
 O10 Zr3 Zr1 87.05(19) 11 10_557 ?
 O10 Zr3 Zr1 87.04(19) . 4_556 ?
 O10 Zr3 Zr1 33.43(9) . 10_557 ?
 O10 Zr3 Zr1 33.43(9) . . ?
 O10 Zr3 O3 78.9(2) 11 14_447 ?
 O10 Zr3 O3 144.03(12) . 5_445 ?
 O10 Zr3 O3 78.9(2) . 15_545 ?
 O10 Zr3 O3 144.03(12) . 14_447 ?
 O10 Zr3 O3 144.03(12) 11 15_545 ?
 O10 Zr3 O3 144.03(12) 11 8_546 ?
 O10 Zr3 O3 78.9(2) . 8_546 ?
 O10 Zr3 O3 78.9(2) 11 5_445 ?
 O10 Zr3 O9 70.62(16) 11 10_557 ?
 O10 Zr3 O9 70.61(16) 11 . ?
 O10 Zr3 O9 70.61(16) . . ?
 O10 Zr3 O9 70.61(16) . 10_557 ?
 O10 Zr3 O10 101.5(4) 11 . ?
 C1 O1 Zr1 134.1(5) . . ?
 C1 O2 Zr2 131.0(4) . . ?
 C27 O3 Zr3 132.7(5) . 5 ?
 C27 O4 Zr1 134.8(5) . 15 ?
 Zr1 O7 Zr1 115.3(3) 11 . ?
 Zr1 O7 Zr2 112.8(3) 11 . ?
 Zr1 O7 Zr2 112.8(3) . . ?
 Zr1 O8 Zr1 107.4(3) 10_557 . ?
 Zr1 O8 Zr2 104.0(3) . . ?
 Zr1 O8 Zr2 104.0(3) 10_557 . ?
 Zr1 O9 Zr1 108.2(3) 11 . ?
 Zr1 O9 Zr3 104.2(3) . . ?
 Zr1 O9 Zr3 104.2(3) 11 . ?
 Zr1 O10 Zr1 114.6(3) 10_557 . ?
 Zr1 O10 Zr3 113.0(2) 10_557 . ?
 Zr1 O10 Zr3 113.0(2) . . ?
 O1 C1 O2 126.9(7) . . ?
 O1 C1 C2 117.0(7) . . ?
 O2 C1 C2 116.1(7) . . ?
 C3 C2 C1 122.3(7) . . ?
 C3 C2 C7 118.2(7) . . ?
 C7 C2 C1 119.4(8) . . ?
 C4 C3 C2 121.9(9) . . ?
 C3 C4 C5 120.9(9) . . ?
 C4 C5 C6 118.4(8) . . ?
 C4 C5 C8 122.3(9) . . ?
 C6 C5 C8 119.3(8) . . ?
 C5 C6 C7 120.5(9) . . ?
 C2 C7 C6 120.1(9) . . ?
 C9 C8 C5 120.3(11) . . ?
 C13 C8 C5 120.1(10) . . ?
 C13 C8 C9 119.1(12) . . ?
 C9A C8 C5 125.2(13) . . ?
 C9A C8 C13A 117.5(15) . . ?
 C13A C8 C5 117.2(13) . . ?
 C8 C9 C10 116.7(18) . . ?
 C11 C10 C9 123.6(16) . . ?
 C10 C11 C12 117.9(11) . . ?
 C10 C11 C14 120.4(10) . . ?
 C12 C11 C14 121.5(11) . . ?
 C10A C11 C14 120.7(12) . . ?
 C12A C11 C14 120.5(13) . . ?
 C12A C11 C10A 118.7(14) . . ?
 C11 C12 C13 119.8(17) . . ?
 C8 C13 C12 122.4(17) . . ?
 C11 C14 C15 114.5(6) . . ?
 C14 C14 C11 121.9(4) 10_556 . ?
 C14 C14 C15 123.6(4) 10_556 . ?
 C16 C15 C14 121.2(12) . . ?
 C16 C15 C20 117.7(13) . . ?
 C20 C15 C14 120.9(11) . . ?
 C16A C15 C14 119.5(10) . . ?
 C20A C15 C14 123.7(10) . . ?
 C20A C15 C16A 116.6(11) . . ?
 C15 C16 C17 121(2) . . ?
 C18 C17 C16 123(2) . . ?
 C17 C18 C19 115.9(12) . . ?
 C17 C18 C21 121.1(11) . . ?
 C19 C18 C21 122.3(12) . . ?
 C17A C18 C21 119.9(10) . . ?
 C19A C18 C21 122.9(11) . . ?
 C19A C18 C17A 117.0(12) . . ?
 C18 C19 C20 118.7(19) . . ?
 C15 C20 C19 121.9(18) . . ?
 C22 C21 C18 121.4(9) . . ?
 C22 C21 C26 118.0(8) . . ?
 C26 C21 C18 120.6(9) . . ?
 C21 C22 C23 122.1(10) . . ?
 C24 C23 C22 119.4(10) . . ?
 C23 C24 C27 120.5(7) . . ?
 C25 C24 C23 118.8(8) . . ?
 C25 C24 C27 120.7(8) . . ?
 C24 C25 C26 121.5(9) . . ?
 C21 C26 C25 120.2(9) . . ?
 O3 C27 O4 125.0(7) . . ?
 O3 C27 C24 116.9(7) . . ?
 O4 C27 C24 117.9(7) . . ?
 C8 C9A C10A 123(2) . . ?
 C11 C10A C9A 120(2) . . ?
 C11 C12A C13A 121(2) . . ?
 C8 C13A C12A 119(2) . . ?
 C17A C16A C15 121.0(18) . . ?
 C16A C17A C18 119.7(17) . . ?
 C18 C19A C20A 122.9(18) . . ?
 C15 C20A C19A 122.5(18) . . ?

_shelx_fab_file
;
 0 0 2 -385.51 0.00
 0 0 4 197.18 0.00
 0 0 6 -184.72 0.00
 0 0 8 1.86 0.00
 0 0 10 14.23 0.00
 0 0 12 14.14 0.00
 0 0 14 -3.89 0.00
 0 0 16 -20.27 0.00
 0 0 18 6.52 0.00
 0 2 1 -58.38 0.00
 0 2 2 -28.55 0.00
 0 2 3 -39.47 0.00
 0 2 4 109.57 0.00
 0 2 5 8.32 0.00
 0 2 6 119.51 0.00
 0 2 7 -16.65 0.00
 0 2 8 28.99 0.00
 0 2 9 -2.48 0.00
 0 2 10 -13.24 0.00
 0 2 11 -14.80 0.00
 0 2 12 -8.89 0.00
 0 2 13 -1.08 0.00
 0 2 14 -1.23 0.00
 0 2 15 -14.58 0.00
 0 2 16 -8.50 0.00
 0 2 17 -10.29 0.00
 0 2 18 1.21 0.00
 0 4 2 177.84 0.00
 0 4 3 11.07 0.00
 0 4 4 -37.31 0.00
 0 4 5 6.35 0.00
 0 4 6 27.50 0.00
 0 4 7 0.52 0.00
 0 4 8 -46.00 0.00
 0 4 9 16.97 0.00
 0 4 10 16.44 0.00
 0 4 11 11.85 0.00
 0 4 12 -6.46 0.00
 0 4 13 -9.44 0.00
 0 4 14 -4.17 0.00
 0 4 15 0.89 0.00
 0 4 16 -7.57 0.00
 0 4 17 8.87 0.00
 0 4 18 4.45 0.00
 0 6 0 240.37 0.00
 0 6 1 24.88 0.00
 0 6 2 -59.23 0.00
 0 6 3 -14.76 0.00
 0 6 4 53.53 0.00
 0 6 5 18.63 0.00
 0 6 6 4.74 0.00
 0 6 7 17.65 0.00
 0 6 8 12.89 0.00
 0 6 9 -11.89 0.00
 0 6 10 -4.81 0.00
 0 6 11 -10.52 0.00
 0 6 12 -7.15 0.00
 0 6 13 -9.24 0.00
 0 6 14 -0.06 0.00
 0 6 15 7.30 0.00
 0 6 16 8.09 0.00
 0 6 17 -8.42 0.00
 0 6 18 6.47 0.00
 0 6 19 14.50 0.00
 0 8 0 -168.68 0.00
 0 8 1 -2.14 0.00
 0 8 2 10.79 0.00
 0 8 3 -14.49 0.00
 0 8 4 -0.56 0.00
 0 8 5 -31.37 0.00
 0 8 6 -21.46 0.00
 0 8 7 -23.68 0.00
 0 8 8 24.42 0.00
 0 8 9 10.72 0.00
 0 8 10 15.55 0.00
 0 8 11 12.31 0.00
 0 8 12 5.55 0.00
 0 8 13 2.91 0.00
 0 8 14 -6.78 0.00
 0 8 15 -7.13 0.00
 0 8 16 2.15 0.00
 0 8 17 5.65 0.00
 0 8 18 -1.35 0.00
 0 8 19 -11.51 0.00
 0 10 0 11.76 0.00
 0 10 1 -52.50 0.00
 0 10 2 86.16 0.00
 0 10 3 58.24 0.00
 0 10 4 38.41 0.00
 0 10 5 13.30 0.00
 0 10 6 8.98 0.00
 0 10 7 29.41 0.00
 0 10 8 -21.31 0.00
 0 10 9 0.82 0.00
 0 10 10 -6.83 0.00
 0 10 11 -3.64 0.00
 0 10 12 -2.32 0.00
 0 10 13 -2.29 0.00
 0 10 14 12.26 0.00
 0 10 15 2.45 0.00
 0 10 16 3.60 0.00
 0 10 17 12.71 0.00
 0 10 18 -8.62 0.00
 0 10 19 5.66 0.00
 0 12 0 -146.62 0.00
 0 12 1 34.62 0.00
 0 12 2 0.29 0.00
 0 12 3 -6.57 0.00
 0 12 4 -16.36 0.00
 0 12 5 -34.50 0.00
 0 12 6 -0.32 0.00
 0 12 7 -10.86 0.00
 0 12 8 19.84 0.00
 0 12 9 -13.88 0.00
 0 12 10 -4.15 0.00
 0 12 11 2.85 0.00
 0 12 12 -8.92 0.00
 0 12 13 4.66 0.00
 0 12 14 -9.11 0.00
 0 12 15 -5.33 0.00
 0 12 16 -2.49 0.00
 0 12 17 3.88 0.00
 0 12 18 8.95 0.00
 0 12 19 -13.63 0.00
 0 14 0 56.86 0.00
 0 14 1 -21.21 0.00
 0 14 2 -2.83 0.00
 0 14 3 21.68 0.00
 0 14 4 -13.94 0.00
 0 14 5 14.08 0.00
 0 14 6 -68.49 0.00
 0 14 7 -12.60 0.00
 0 14 8 26.54 0.00
 0 14 9 15.38 0.00
 0 14 10 7.59 0.00
 0 14 11 16.72 0.00
 0 14 12 6.05 0.00
 0 14 13 5.63 0.00
 0 14 14 2.58 0.00
 0 14 15 6.57 0.00
 0 14 16 -4.55 0.00
 0 14 17 0.69 0.00
 0 14 18 -5.62 0.00
 0 16 0 -10.97 0.00
 0 16 1 2.31 0.00
 0 16 2 -26.02 0.00
 0 16 3 -1.28 0.00
 0 16 4 56.10 0.00
 0 16 5 -0.14 0.00
 0 16 6 5.66 0.00
 0 16 7 34.10 0.00
 0 16 8 -7.03 0.00
 0 16 9 -9.05 0.00
 0 16 10 -23.17 0.00
 0 16 11 -5.73 0.00
 0 16 12 -11.21 0.00
 0 16 13 4.31 0.00
 0 16 14 2.52 0.00
 0 16 15 1.11 0.00
 0 16 16 -1.32 0.00
 0 16 17 -2.07 0.00
 0 16 18 4.73 0.00
 0 18 0 -31.94 0.00
 0 18 1 11.21 0.00
 0 18 2 1.91 0.00
 0 18 3 -10.45 0.00
 0 18 4 -54.86 0.00
 0 18 5 -8.40 0.00
 0 18 6 -13.32 0.00
 0 18 7 -8.32 0.00
 0 18 8 -13.91 0.00
 0 18 9 -1.15 0.00
 0 18 10 16.59 0.00
 0 18 11 -9.84 0.00
 0 18 12 1.84 0.00
 0 18 13 4.52 0.00
 0 18 14 -3.72 0.00
 0 18 15 -7.25 0.00
 0 18 16 1.15 0.00
 0 18 17 -0.98 0.00
 0 18 18 -1.49 0.00
 0 20 0 8.36 0.00
 0 20 1 -28.38 0.00
 0 20 2 -11.44 0.00
 0 20 3 17.35 0.00
 0 20 4 -7.51 0.00
 0 20 5 10.48 0.00
 0 20 6 -0.11 0.00
 0 20 7 8.03 0.00
 0 20 8 6.31 0.00
 0 20 9 9.46 0.00
 0 20 10 -4.29 0.00
 0 20 11 8.75 0.00
 0 20 12 3.15 0.00
 0 20 13 -1.36 0.00
 0 20 14 0.69 0.00
 0 20 15 7.36 0.00
 0 20 16 4.75 0.00
 0 20 17 1.17 0.00
 0 20 18 -1.29 0.00
 0 22 2 -23.05 0.00
 0 22 3 5.05 0.00
 0 22 4 46.45 0.00
 0 22 5 -6.41 0.00
 0 22 6 -7.23 0.00
 0 22 7 11.43 0.00
 0 22 8 -9.60 0.00
 0 22 9 -11.46 0.00
 0 22 10 -8.27 0.00
 0 22 11 3.68 0.00
 0 22 12 -6.53 0.00
 0 22 13 -7.50 0.00
 0 22 14 -2.21 0.00
 0 22 15 -4.11 0.00
 0 22 16 -1.95 0.00
 0 22 17 -2.35 0.00
 0 24 2 -11.30 0.00
 0 24 3 -11.29 0.00
 0 24 4 -28.26 0.00
 0 24 5 20.31 0.00
 0 24 6 -1.09 0.00
 0 24 7 -14.12 0.00
 0 24 8 -8.84 0.00
 0 24 9 8.93 0.00
 0 24 10 12.03 0.00
 0 24 11 -9.90 0.00
 0 24 12 0.86 0.00
 0 24 13 15.02 0.00
 0 24 14 5.05 0.00
 0 24 15 1.47 0.00
 0 24 16 2.09 0.00
 0 24 17 -5.91 0.00
 0 26 1 -17.82 0.00
 0 26 2 16.27 0.00
 0 26 3 18.18 0.00
 0 26 4 1.32 0.00
 0 26 5 -0.07 0.00
 0 26 6 18.27 0.00
 0 26 7 1.67 0.00
 0 26 8 -6.72 0.00
 0 26 9 6.44 0.00
 0 26 10 1.20 0.00
 0 26 11 4.85 0.00
 0 26 12 -11.00 0.00
 0 26 13 6.05 0.00
 0 26 14 -4.70 0.00
 0 26 15 -6.04 0.00
 0 26 16 -4.96 0.00
 0 28 1 13.87 0.00
 0 28 2 8.37 0.00
 0 28 3 -5.16 0.00
 0 28 4 -8.73 0.00
 0 28 5 -7.58 0.00
 0 28 6 2.09 0.00
 0 28 7 -3.89 0.00
 0 28 8 -4.31 0.00
 0 28 9 -10.54 0.00
 0 28 10 4.98 0.00
 0 28 11 0.59 0.00
 0 28 12 5.69 0.00
 0 28 13 3.09 0.00
 0 28 14 2.62 0.00
 0 28 15 1.32 0.00
 0 28 16 4.38 0.00
 0 30 0 3.59 0.00
 0 30 1 -13.75 0.00
 0 30 2 -8.23 0.00
 0 30 3 10.65 0.00
 0 30 4 -7.13 0.00
 0 30 5 4.27 0.00
 0 30 6 -9.26 0.00
 0 30 7 7.02 0.00
 0 30 8 -4.80 0.00
 0 30 9 6.36 0.00
 0 30 10 -2.61 0.00
 0 30 11 0.08 0.00
 0 30 12 -8.04 0.00
 0 30 13 1.75 0.00
 0 30 14 -1.79 0.00
 0 30 15 -13.96 0.00
 0 32 0 16.49 0.00
 0 32 1 0.64 0.00
 0 32 2 17.18 0.00
 0 32 3 -11.58 0.00
 0 32 4 -17.31 0.00
 0 32 5 -6.13 0.00
 0 32 6 11.12 0.00
 0 32 7 -4.37 0.00
 0 32 8 -2.36 0.00
 0 32 9 3.80 0.00
 0 32 10 -4.23 0.00
 0 32 11 6.15 0.00
 0 32 12 1.28 0.00
 0 32 13 -7.07 0.00
 0 32 14 -9.46 0.00
 0 34 0 -5.43 0.00
 0 34 1 9.17 0.00
 0 34 2 -6.28 0.00
 0 34 3 4.73 0.00
 0 34 4 9.03 0.00
 0 34 5 1.93 0.00
 0 34 6 3.72 0.00
 0 34 7 -4.09 0.00
 0 34 8 12.19 0.00
 0 34 9 -9.91 0.00
 0 34 10 -2.99 0.00
 0 34 11 -5.36 0.00
 0 34 12 -0.83 0.00
 0 36 0 -26.09 0.00
 0 36 1 -8.03 0.00
 0 36 2 -9.54 0.00
 0 36 3 -3.82 0.00
 0 36 4 -2.28 0.00
 0 36 5 -1.19 0.00
 0 36 6 -2.59 0.00
 0 36 7 5.80 0.00
 0 36 8 4.56 0.00
 0 36 9 4.37 0.00
 0 36 10 -6.49 0.00
 0 36 11 -1.46 0.00
 0 36 12 -22.42 0.00
 0 38 1 12.36 0.00
 0 38 2 11.12 0.00
 0 38 3 -6.65 0.00
 0 38 4 -9.40 0.00
 0 38 5 1.26 0.00
 0 38 6 -6.14 0.00
 0 38 7 -11.32 0.00
 0 38 8 -5.45 0.00
 0 38 9 2.18 0.00
 0 38 10 5.76 0.00
 0 38 11 7.26 0.00
 0 40 0 -39.39 0.00
 0 40 1 -1.91 0.00
 0 40 2 3.03 0.00
 0 40 3 6.84 0.00
 0 40 4 -6.72 0.00
 0 40 5 6.42 0.00
 0 40 6 7.68 0.00
 0 40 7 3.31 0.00
 0 40 8 15.45 0.00
 0 40 9 4.98 0.00
 0 40 10 -30.48 0.00
 0 42 0 -9.30 0.00
 0 42 1 -2.66 0.00
 0 42 2 6.44 0.00
 0 42 3 -5.57 0.00
 0 42 4 1.20 0.00
 0 42 5 -1.71 0.00
 0 42 6 -0.36 0.00
 0 42 7 3.67 0.00
 0 42 8 4.32 0.00
 0 42 9 -3.56 0.00
 0 44 0 0.22 0.00
 0 44 1 4.82 0.00
 0 44 2 2.77 0.00
 0 44 3 -0.45 0.00
 0 44 4 3.58 0.00
 0 44 5 -7.95 0.00
 0 44 6 -2.22 0.00
 0 44 7 11.32 0.00
 0 44 8 0.97 0.00
 0 46 0 5.75 0.00
 0 46 1 -3.93 0.00
 0 46 2 -2.17 0.00
 0 46 3 -7.22 0.00
 0 46 4 3.61 0.00
 0 46 5 4.65 0.00
 0 46 6 -2.99 0.00
 0 48 0 1.19 0.00
 0 48 1 7.92 0.00
 0 48 2 -3.42 0.00
 0 48 3 -4.40 0.00
 1 1 1 -336.62 0.00
 1 1 2 -5.42 0.00
 1 1 3 -253.97 0.00
 1 1 4 -9.00 0.00
 1 1 5 -58.79 0.00
 1 1 6 -0.23 0.00
 1 1 7 8.60 0.00
 1 1 8 5.11 0.00
 1 1 9 29.78 0.00
 1 1 10 -9.34 0.00
 1 1 11 -4.38 0.00
 1 1 12 8.82 0.00
 1 1 13 -15.30 0.00
 1 1 14 -0.31 0.00
 1 1 15 -11.33 0.00
 1 1 16 0.93 0.00
 1 1 17 -2.06 0.00
 1 1 18 -23.77 0.00
 1 3 1 183.99 0.00
 1 3 2 -38.25 0.00
 1 3 3 -19.25 0.00
 1 3 4 -6.26 0.00
 1 3 5 92.34 0.00
 1 3 6 -21.59 0.00
 1 3 7 -16.81 0.00
 1 3 8 1.95 0.00
 1 3 9 -19.49 0.00
 1 3 10 -5.22 0.00
 1 3 11 -3.07 0.00
 1 3 12 8.28 0.00
 1 3 13 -3.25 0.00
 1 3 14 1.71 0.00
 1 3 15 6.72 0.00
 1 3 16 5.31 0.00
 1 3 17 -7.98 0.00
 1 3 18 -6.33 0.00
 1 5 1 143.86 0.00
 1 5 2 -0.79 0.00
 1 5 3 -50.64 0.00
 1 5 4 -1.50 0.00
 1 5 5 20.66 0.00
 1 5 6 19.73 0.00
 1 5 7 12.74 0.00
 1 5 8 8.90 0.00
 1 5 9 3.65 0.00
 1 5 10 0.13 0.00
 1 5 11 4.24 0.00
 1 5 12 3.70 0.00
 1 5 13 -8.54 0.00
 1 5 14 -8.35 0.00
 1 5 15 3.03 0.00
 1 5 16 -0.73 0.00
 1 5 17 -0.67 0.00
 1 5 18 -1.44 0.00
 1 5 19 17.32 0.00
 1 7 0 43.67 0.00
 1 7 1 12.02 0.00
 1 7 2 27.50 0.00
 1 7 3 -31.46 0.00
 1 7 4 -4.88 0.00
 1 7 5 8.76 0.00
 1 7 6 3.02 0.00
 1 7 7 -10.69 0.00
 1 7 8 -16.40 0.00
 1 7 9 -14.14 0.00
 1 7 10 -1.69 0.00
 1 7 11 -5.87 0.00
 1 7 12 1.49 0.00
 1 7 13 6.05 0.00
 1 7 14 2.22 0.00
 1 7 15 -3.67 0.00
 1 7 16 3.05 0.00
 1 7 17 -2.21 0.00
 1 7 18 9.71 0.00
 1 7 19 -12.52 0.00
 1 9 0 -43.33 0.00
 1 9 1 19.05 0.00
 1 9 2 -22.20 0.00
 1 9 3 30.48 0.00
 1 9 4 -17.55 0.00
 1 9 5 42.20 0.00
 1 9 6 3.18 0.00
 1 9 7 66.36 0.00
 1 9 8 12.59 0.00
 1 9 9 -2.69 0.00
 1 9 10 5.88 0.00
 1 9 11 4.40 0.00
 1 9 12 -4.76 0.00
 1 9 13 2.07 0.00
 1 9 14 -10.47 0.00
 1 9 15 10.21 0.00
 1 9 16 0.84 0.00
 1 9 17 6.44 0.00
 1 9 18 9.15 0.00
 1 9 19 -3.97 0.00
 1 11 0 22.13 0.00
 1 11 1 16.07 0.00
 1 11 2 33.57 0.00
 1 11 3 -1.76 0.00
 1 11 4 20.63 0.00
 1 11 5 -29.44 0.00
 1 11 6 1.65 0.00
 1 11 7 -13.53 0.00
 1 11 8 2.42 0.00
 1 11 9 2.95 0.00
 1 11 10 -5.35 0.00
 1 11 11 5.54 0.00
 1 11 12 4.07 0.00
 1 11 13 -2.53 0.00
 1 11 14 0.34 0.00
 1 11 15 -8.14 0.00
 1 11 16 -9.86 0.00
 1 11 17 -3.26 0.00
 1 11 18 11.86 0.00
 1 11 19 -5.96 0.00
 1 13 0 -0.16 0.00
 1 13 1 -9.18 0.00
 1 13 2 -12.44 0.00
 1 13 3 35.90 0.00
 1 13 4 -13.54 0.00
 1 13 5 30.26 0.00
 1 13 6 1.07 0.00
 1 13 7 -7.40 0.00
 1 13 8 -1.96 0.00
 1 13 9 -3.64 0.00
 1 13 10 -4.13 0.00
 1 13 11 -0.77 0.00
 1 13 12 2.41 0.00
 1 13 13 9.54 0.00
 1 13 14 0.53 0.00
 1 13 15 5.71 0.00
 1 13 16 7.85 0.00
 1 13 17 7.31 0.00
 1 13 18 1.26 0.00
 1 15 0 2.59 0.00
 1 15 1 -20.54 0.00
 1 15 2 21.49 0.00
 1 15 3 -21.72 0.00
 1 15 4 -17.98 0.00
 1 15 5 28.39 0.00
 1 15 6 0.34 0.00
 1 15 7 25.84 0.00
 1 15 8 13.95 0.00
 1 15 9 16.90 0.00
 1 15 10 5.41 0.00
 1 15 11 5.23 0.00
 1 15 12 -3.52 0.00
 1 15 13 -5.21 0.00
 1 15 14 -2.37 0.00
 1 15 15 0.37 0.00
 1 15 16 -5.32 0.00
 1 15 17 -2.88 0.00
 1 15 18 -6.53 0.00
 1 17 0 31.81 0.00
 1 17 1 3.26 0.00
 1 17 2 12.05 0.00
 1 17 3 -3.47 0.00
 1 17 4 15.70 0.00
 1 17 5 -2.99 0.00
 1 17 6 5.15 0.00
 1 17 7 -38.35 0.00
 1 17 8 -2.53 0.00
 1 17 9 -6.03 0.00
 1 17 10 -3.11 0.00
 1 17 11 -0.86 0.00
 1 17 12 1.41 0.00
 1 17 13 -1.45 0.00
 1 17 14 3.67 0.00
 1 17 15 -3.49 0.00
 1 17 16 -0.34 0.00
 1 17 17 -4.98 0.00
 1 17 18 2.84 0.00
 1 19 0 -12.92 0.00
 1 19 1 -13.83 0.00
 1 19 2 -20.51 0.00
 1 19 3 13.69 0.00
 1 19 4 -11.02 0.00
 1 19 5 10.70 0.00
 1 19 6 3.61 0.00
 1 19 7 2.38 0.00
 1 19 8 -6.81 0.00
 1 19 9 8.30 0.00
 1 19 10 -7.55 0.00
 1 19 11 5.86 0.00
 1 19 12 3.63 0.00
 1 19 13 1.18 0.00
 1 19 14 -1.12 0.00
 1 19 15 -1.63 0.00
 1 19 16 0.89 0.00
 1 19 17 2.17 0.00
 1 19 18 1.54 0.00
 1 21 0 22.84 0.00
 1 21 1 -14.18 0.00
 1 21 2 9.80 0.00
 1 21 3 -0.81 0.00
 1 21 4 6.55 0.00
 1 21 5 4.29 0.00
 1 21 6 10.26 0.00
 1 21 7 -3.94 0.00
 1 21 8 7.42 0.00
 1 21 9 -1.14 0.00
 1 21 10 8.03 0.00
 1 21 11 3.88 0.00
 1 21 12 -3.21 0.00
 1 21 13 -3.87 0.00
 1 21 14 0.77 0.00
 1 21 15 -4.86 0.00
 1 21 16 -2.84 0.00
 1 21 17 2.03 0.00
 1 23 1 25.61 0.00
 1 23 2 -13.85 0.00
 1 23 3 3.42 0.00
 1 23 4 14.65 0.00
 1 23 5 0.27 0.00
 1 23 6 -13.75 0.00
 1 23 7 -20.14 0.00
 1 23 8 -5.93 0.00
 1 23 9 1.42 0.00
 1 23 10 -3.97 0.00
 1 23 11 -0.80 0.00
 1 23 12 -19.85 0.00
 1 23 13 4.35 0.00
 1 23 14 -1.45 0.00
 1 23 15 -1.03 0.00
 1 23 16 2.56 0.00
 1 23 17 19.64 0.00
 1 25 1 5.69 0.00
 1 25 2 -12.39 0.00
 1 25 3 -10.31 0.00
 1 25 4 0.93 0.00
 1 25 5 5.90 0.00
 1 25 6 -3.67 0.00
 1 25 7 5.78 0.00
 1 25 8 2.64 0.00
 1 25 9 5.34 0.00
 1 25 10 5.83 0.00
 1 25 11 10.98 0.00
 1 25 12 2.57 0.00
 1 25 13 2.10 0.00
 1 25 14 1.80 0.00
 1 25 15 1.52 0.00
 1 25 16 1.76 0.00
 1 25 17 6.00 0.00
 1 27 0 -5.24 0.00
 1 27 1 9.89 0.00
 1 27 2 12.12 0.00
 1 27 3 -6.52 0.00
 1 27 4 7.60 0.00
 1 27 5 -3.28 0.00
 1 27 6 2.92 0.00
 1 27 7 -2.62 0.00
 1 27 8 -4.17 0.00
 1 27 9 -3.62 0.00
 1 27 10 -0.65 0.00
 1 27 11 -8.85 0.00
 1 27 12 -10.81 0.00
 1 27 13 2.09 0.00
 1 27 14 -6.74 0.00
 1 27 15 2.72 0.00
 1 27 16 -4.63 0.00
 1 29 0 -7.68 0.00
 1 29 1 1.74 0.00
 1 29 2 -6.45 0.00
 1 29 3 0.00 0.00
 1 29 4 -8.20 0.00
 1 29 5 -5.64 0.00
 1 29 6 -3.41 0.00
 1 29 7 -0.47 0.00
 1 29 8 -0.53 0.00
 1 29 9 -0.10 0.00
 1 29 10 3.85 0.00
 1 29 11 3.12 0.00
 1 29 12 0.97 0.00
 1 29 13 1.06 0.00
 1 29 14 4.90 0.00
 1 29 15 -1.82 0.00
 1 31 0 4.40 0.00
 1 31 1 3.62 0.00
 1 31 2 -2.10 0.00
 1 31 3 1.84 0.00
 1 31 4 2.06 0.00
 1 31 5 -7.86 0.00
 1 31 6 2.07 0.00
 1 31 7 11.62 0.00
 1 31 8 -3.16 0.00
 1 31 9 1.34 0.00
 1 31 10 -1.66 0.00
 1 31 11 2.99 0.00
 1 31 12 -0.46 0.00
 1 31 13 -4.59 0.00
 1 31 14 6.58 0.00
 1 33 0 -1.55 0.00
 1 33 1 -4.20 0.00
 1 33 2 -16.35 0.00
 1 33 3 -2.70 0.00
 1 33 4 10.55 0.00
 1 33 5 -1.44 0.00
 1 33 6 3.57 0.00
 1 33 7 -0.87 0.00
 1 33 8 2.99 0.00
 1 33 9 4.12 0.00
 1 33 10 -7.49 0.00
 1 33 11 7.60 0.00
 1 33 12 -13.92 0.00
 1 33 13 -9.38 0.00
 1 35 0 9.08 0.00
 1 35 1 -9.06 0.00
 1 35 2 -5.39 0.00
 1 35 3 5.01 0.00
 1 35 4 -10.80 0.00
 1 35 5 6.11 0.00
 1 35 6 -5.25 0.00
 1 35 7 -11.85 0.00
 1 35 8 -1.62 0.00
 1 35 9 0.28 0.00
 1 35 10 12.57 0.00
 1 35 11 -1.13 0.00
 1 35 12 12.40 0.00
 1 37 0 -5.13 0.00
 1 37 1 37.19 0.00
 1 37 2 0.65 0.00
 1 37 3 -15.94 0.00
 1 37 4 7.80 0.00
 1 37 5 11.93 0.00
 1 37 6 3.52 0.00
 1 37 7 0.65 0.00
 1 37 8 -4.83 0.00
 1 37 9 13.35 0.00
 1 37 10 -8.33 0.00
 1 37 11 -15.88 0.00
 1 37 12 -15.23 0.00
 1 39 0 -4.72 0.00
 1 39 1 24.68 0.00
 1 39 2 -7.70 0.00
 1 39 3 -9.36 0.00
 1 39 4 -3.82 0.00
 1 39 5 -4.03 0.00
 1 39 6 2.63 0.00
 1 39 7 -1.07 0.00
 1 39 8 -0.07 0.00
 1 39 9 17.21 0.00
 1 39 10 -2.24 0.00
 1 39 11 -0.03 0.00
 1 41 0 1.41 0.00
 1 41 1 -5.43 0.00
 1 41 2 -1.14 0.00
 1 41 3 9.00 0.00
 1 41 4 -0.91 0.00
 1 41 5 1.82 0.00
 1 41 6 1.57 0.00
 1 41 7 1.11 0.00
 1 41 8 -1.95 0.00
 1 41 9 -17.55 0.00
 1 41 10 4.03 0.00
 1 43 0 -4.29 0.00
 1 43 1 -8.02 0.00
 1 43 2 0.31 0.00
 1 43 3 0.88 0.00
 1 43 4 4.43 0.00
 1 43 5 -4.50 0.00
 1 43 6 -1.88 0.00
 1 43 7 3.54 0.00
 1 43 8 4.34 0.00
 1 43 9 -12.59 0.00
 1 45 0 1.07 0.00
 1 45 1 -1.57 0.00
 1 45 2 -8.35 0.00
 1 45 3 -0.42 0.00
 1 45 4 -4.42 0.00
 1 45 5 1.96 0.00
 1 45 6 -10.50 0.00
 1 45 7 6.03 0.00
 1 47 0 1.04 0.00
 1 47 1 0.46 0.00
 1 47 2 -7.38 0.00
 1 47 3 -2.41 0.00
 1 47 4 6.24 0.00
 1 47 5 -7.07 0.00
 2 0 0 476.00 0.00
 2 0 2 241.00 0.00
 2 0 4 -30.59 0.00
 2 0 6 -1.19 0.00
 2 0 8 -1.78 0.00
 2 0 10 -4.09 0.00
 2 0 12 11.49 0.00
 2 0 14 -2.61 0.00
 2 0 16 -9.48 0.00
 2 0 18 7.89 0.00
 2 2 0 627.93 0.00
 2 2 1 17.01 0.00
 2 2 2 -126.64 0.00
 2 2 3 -0.99 0.00
 2 2 4 78.04 0.00
 2 2 5 -2.86 0.00
 2 2 6 53.68 0.00
 2 2 7 -12.77 0.00
 2 2 8 6.80 0.00
 2 2 9 -13.55 0.00
 2 2 10 4.67 0.00
 2 2 11 -2.06 0.00
 2 2 12 -8.58 0.00
 2 2 13 -16.48 0.00
 2 2 14 -4.30 0.00
 2 2 15 -5.63 0.00
 2 2 16 -4.95 0.00
 2 2 17 -5.34 0.00
 2 2 18 -4.77 0.00
 2 2 19 -15.30 0.00
 2 4 0 125.16 0.00
 2 4 1 -16.21 0.00
 2 4 2 -78.07 0.00
 2 4 3 -58.83 0.00
 2 4 4 118.66 0.00
 2 4 5 13.79 0.00
 2 4 6 -22.82 0.00
 2 4 7 12.30 0.00
 2 4 8 4.68 0.00
 2 4 9 12.96 0.00
 2 4 10 -4.38 0.00
 2 4 11 1.09 0.00
 2 4 12 -6.31 0.00
 2 4 13 8.42 0.00
 2 4 14 -5.15 0.00
 2 4 15 -2.57 0.00
 2 4 16 -4.88 0.00
 2 4 17 -11.42 0.00
 2 4 18 0.67 0.00
 2 4 19 3.73 0.00
 2 6 0 140.52 0.00
 2 6 1 9.64 0.00
 2 6 2 89.81 0.00
 2 6 3 56.37 0.00
 2 6 4 -14.69 0.00
 2 6 5 -0.80 0.00
 2 6 6 34.00 0.00
 2 6 7 -8.40 0.00
 2 6 8 -4.30 0.00
 2 6 9 -0.89 0.00
 2 6 10 4.02 0.00
 2 6 11 -1.64 0.00
 2 6 12 -9.27 0.00
 2 6 13 -12.43 0.00
 2 6 14 3.63 0.00
 2 6 15 -2.54 0.00
 2 6 16 2.93 0.00
 2 6 17 13.64 0.00
 2 6 18 9.96 0.00
 2 6 19 -4.06 0.00
 2 8 1 -41.68 0.00
 2 8 2 -18.90 0.00
 2 8 3 -14.77 0.00
 2 8 4 -24.91 0.00
 2 8 5 -17.12 0.00
 2 8 6 -13.42 0.00
 2 8 7 4.60 0.00
 2 8 8 17.98 0.00
 2 8 9 -3.30 0.00
 2 8 10 10.30 0.00
 2 8 11 3.13 0.00
 2 8 12 3.75 0.00
 2 8 13 -4.09 0.00
 2 8 14 -0.06 0.00
 2 8 15 -6.17 0.00
 2 8 16 1.76 0.00
 2 8 17 -0.95 0.00
 2 8 18 -1.23 0.00
 2 8 19 0.57 0.00
 2 10 0 -63.79 0.00
 2 10 1 22.53 0.00
 2 10 2 37.64 0.00
 2 10 3 20.53 0.00
 2 10 4 78.44 0.00
 2 10 5 3.07 0.00
 2 10 6 -17.72 0.00
 2 10 7 7.80 0.00
 2 10 8 -9.18 0.00
 2 10 9 2.02 0.00
 2 10 10 -1.84 0.00
 2 10 11 5.22 0.00
 2 10 12 -2.87 0.00
 2 10 13 6.46 0.00
 2 10 14 1.12 0.00
 2 10 15 10.77 0.00
 2 10 16 -3.69 0.00
 2 10 17 2.49 0.00
 2 10 18 1.59 0.00
 2 10 19 -3.33 0.00
 2 12 0 25.40 0.00
 2 12 1 -29.81 0.00
 2 12 2 -50.33 0.00
 2 12 3 14.50 0.00
 2 12 4 -9.35 0.00
 2 12 5 -13.18 0.00
 2 12 6 -8.11 0.00
 2 12 7 -14.53 0.00
 2 12 8 24.87 0.00
 2 12 9 0.39 0.00
 2 12 10 0.70 0.00
 2 12 11 -4.71 0.00
 2 12 12 -11.21 0.00
 2 12 13 -9.87 0.00
 2 12 14 3.25 0.00
 2 12 15 -8.93 0.00
 2 12 16 0.69 0.00
 2 12 17 11.77 0.00
 2 12 18 0.20 0.00
 2 12 19 1.89 0.00
 2 14 0 -36.26 0.00
 2 14 1 19.06 0.00
 2 14 2 10.58 0.00
 2 14 3 5.71 0.00
 2 14 4 -8.67 0.00
 2 14 5 4.63 0.00
 2 14 6 -26.85 0.00
 2 14 7 2.76 0.00
 2 14 8 -2.66 0.00
 2 14 9 4.81 0.00
 2 14 10 2.40 0.00
 2 14 11 8.01 0.00
 2 14 12 3.00 0.00
 2 14 13 16.77 0.00
 2 14 14 -3.46 0.00
 2 14 15 0.99 0.00
 2 14 16 -5.62 0.00
 2 14 17 -3.31 0.00
 2 14 18 -0.78 0.00
 2 16 0 1.25 0.00
 2 16 1 -3.16 0.00
 2 16 2 16.18 0.00
 2 16 3 0.15 0.00
 2 16 4 4.92 0.00
 2 16 5 11.11 0.00
 2 16 6 -8.98 0.00
 2 16 7 0.19 0.00
 2 16 8 -9.12 0.00
 2 16 9 1.65 0.00
 2 16 10 -7.93 0.00
 2 16 11 -0.54 0.00
 2 16 12 -3.52 0.00
 2 16 13 3.69 0.00
 2 16 14 -6.27 0.00
 2 16 15 3.02 0.00
 2 16 16 3.95 0.00
 2 16 17 3.73 0.00
 2 16 18 3.51 0.00
 2 18 0 -14.15 0.00
 2 18 1 -16.55 0.00
 2 18 2 -47.19 0.00
 2 18 3 -2.89 0.00
 2 18 4 -15.45 0.00
 2 18 5 -13.83 0.00
 2 18 6 -5.29 0.00
 2 18 7 12.09 0.00
 2 18 8 7.99 0.00
 2 18 9 -5.43 0.00
 2 18 10 -1.06 0.00
 2 18 11 -4.28 0.00
 2 18 12 3.94 0.00
 2 18 13 -12.24 0.00
 2 18 14 0.32 0.00
 2 18 15 -4.74 0.00
 2 18 16 0.14 0.00
 2 18 17 -4.99 0.00
 2 18 18 -3.01 0.00
 2 20 0 3.14 0.00
 2 20 1 19.97 0.00
 2 20 2 2.03 0.00
 2 20 3 13.91 0.00
 2 20 4 1.44 0.00
 2 20 5 1.53 0.00
 2 20 6 -3.57 0.00
 2 20 7 6.17 0.00
 2 20 8 -15.11 0.00
 2 20 9 -2.69 0.00
 2 20 10 -0.07 0.00
 2 20 11 10.68 0.00
 2 20 12 -4.28 0.00
 2 20 13 9.88 0.00
 2 20 14 0.54 0.00
 2 20 15 6.44 0.00
 2 20 16 3.24 0.00
 2 20 17 1.21 0.00
 2 20 18 -0.50 0.00
 2 22 0 -12.33 0.00
 2 22 1 -15.80 0.00
 2 22 2 4.06 0.00
 2 22 3 -9.18 0.00
 2 22 4 -12.29 0.00
 2 22 5 20.02 0.00
 2 22 6 8.64 0.00
 2 22 7 -5.10 0.00
 2 22 8 -1.76 0.00
 2 22 9 3.82 0.00
 2 22 10 3.74 0.00
 2 22 11 -8.87 0.00
 2 22 12 -8.05 0.00
 2 22 13 -6.94 0.00
 2 22 14 2.01 0.00
 2 22 15 -2.46 0.00
 2 22 16 -7.48 0.00
 2 22 17 -4.24 0.00
 2 24 0 -7.30 0.00
 2 24 1 7.76 0.00
 2 24 2 -10.10 0.00
 2 24 3 14.20 0.00
 2 24 4 0.07 0.00
 2 24 5 -13.29 0.00
 2 24 6 -3.56 0.00
 2 24 7 4.66 0.00
 2 24 8 -0.70 0.00
 2 24 9 -4.25 0.00
 2 24 10 -2.83 0.00
 2 24 11 -0.22 0.00
 2 24 12 4.35 0.00
 2 24 13 10.35 0.00
 2 24 14 5.61 0.00
 2 24 15 -0.83 0.00
 2 24 16 1.47 0.00
 2 24 17 -1.61 0.00
 2 26 0 18.34 0.00
 2 26 1 -3.13 0.00
 2 26 2 12.40 0.00
 2 26 3 -5.11 0.00
 2 26 4 1.53 0.00
 2 26 5 12.14 0.00
 2 26 6 5.80 0.00
 2 26 7 1.29 0.00
 2 26 8 -2.70 0.00
 2 26 9 3.30 0.00
 2 26 10 3.39 0.00
 2 26 11 5.39 0.00
 2 26 12 -6.01 0.00
 2 26 13 5.36 0.00
 2 26 14 -8.63 0.00
 2 26 15 1.09 0.00
 2 26 16 -1.53 0.00
 2 28 0 -5.28 0.00
 2 28 1 -2.60 0.00
 2 28 2 -2.95 0.00
 2 28 3 7.99 0.00
 2 28 4 -5.65 0.00
 2 28 5 -1.24 0.00
 2 28 6 5.76 0.00
 2 28 7 -12.16 0.00
 2 28 8 -7.23 0.00
 2 28 9 -0.82 0.00
 2 28 10 7.78 0.00
 2 28 11 -7.16 0.00
 2 28 12 2.98 0.00
 2 28 13 -4.21 0.00
 2 28 14 3.57 0.00
 2 28 15 -0.88 0.00
 2 28 16 4.36 0.00
 2 30 0 9.48 0.00
 2 30 1 -1.86 0.00
 2 30 2 9.60 0.00
 2 30 3 0.19 0.00
 2 30 4 -14.17 0.00
 2 30 5 -8.34 0.00
 2 30 6 -9.26 0.00
 2 30 7 9.50 0.00
 2 30 8 -2.40 0.00
 2 30 9 4.02 0.00
 2 30 10 -0.98 0.00
 2 30 11 4.80 0.00
 2 30 12 0.52 0.00
 2 30 13 -1.97 0.00
 2 30 14 -3.77 0.00
 2 30 15 -3.80 0.00
 2 32 0 14.76 0.00
 2 32 1 -9.53 0.00
 2 32 2 1.81 0.00
 2 32 3 -0.12 0.00
 2 32 4 7.16 0.00
 2 32 5 -6.12 0.00
 2 32 6 0.61 0.00
 2 32 7 4.51 0.00
 2 32 8 0.83 0.00
 2 32 9 2.17 0.00
 2 32 10 -3.81 0.00
 2 32 11 1.23 0.00
 2 32 12 -5.94 0.00
 2 32 13 7.96 0.00
 2 32 14 3.51 0.00
 2 34 0 6.15 0.00
 2 34 1 8.14 0.00
 2 34 2 -10.44 0.00
 2 34 3 3.54 0.00
 2 34 4 -5.11 0.00
 2 34 5 3.51 0.00
 2 34 6 12.20 0.00
 2 34 7 -12.12 0.00
 2 34 8 1.74 0.00
 2 34 9 -6.67 0.00
 2 34 10 2.97 0.00
 2 34 11 -4.28 0.00
 2 34 12 -9.18 0.00
 2 34 13 -11.62 0.00
 2 36 0 -55.61 0.00
 2 36 1 1.19 0.00
 2 36 2 30.52 0.00
 2 36 3 -13.75 0.00
 2 36 4 -3.07 0.00
 2 36 5 0.91 0.00
 2 36 6 -9.87 0.00
 2 36 7 0.28 0.00
 2 36 8 7.93 0.00
 2 36 9 7.67 0.00
 2 36 10 -1.20 0.00
 2 36 11 -0.70 0.00
 2 36 12 -0.26 0.00
 2 38 0 -36.31 0.00
 2 38 1 -0.59 0.00
 2 38 2 -10.05 0.00
 2 38 3 6.04 0.00
 2 38 4 -5.22 0.00
 2 38 5 -2.25 0.00
 2 38 6 -6.21 0.00
 2 38 7 -1.86 0.00
 2 38 8 8.34 0.00
 2 38 9 0.25 0.00
 2 38 10 -22.89 0.00
 2 38 11 2.30 0.00
 2 40 0 -4.29 0.00
 2 40 1 6.83 0.00
 2 40 2 -10.10 0.00
 2 40 3 3.86 0.00
 2 40 4 -1.22 0.00
 2 40 5 4.67 0.00
 2 40 6 8.52 0.00
 2 40 7 1.35 0.00
 2 40 8 1.09 0.00
 2 40 9 -1.24 0.00
 2 40 10 -13.50 0.00
 2 42 0 0.48 0.00
 2 42 1 -6.26 0.00
 2 42 2 8.92 0.00
 2 42 3 -2.63 0.00
 2 42 4 2.21 0.00
 2 42 5 -3.37 0.00
 2 42 6 0.46 0.00
 2 42 7 0.61 0.00
 2 42 8 -0.36 0.00
 2 42 9 1.70 0.00
 2 44 0 -8.75 0.00
 2 44 1 0.08 0.00
 2 44 2 0.85 0.00
 2 44 3 0.21 0.00
 2 44 4 -0.27 0.00
 2 44 5 0.60 0.00
 2 44 6 -0.30 0.00
 2 44 7 7.68 0.00
 2 44 8 4.16 0.00
 2 46 0 6.67 0.00
 2 46 1 3.08 0.00
 2 46 2 8.13 0.00
 2 46 3 -6.76 0.00
 2 46 4 3.16 0.00
 2 46 5 -0.43 0.00
 2 46 6 -4.98 0.00
 2 48 0 2.42 0.00
 2 48 1 7.19 0.00
 2 48 2 -3.03 0.00
 2 48 3 -1.79 0.00
 3 1 0 -0.91 0.00
 3 1 1 -138.12 0.00
 3 1 2 -9.16 0.00
 3 1 3 -51.35 0.00
 3 1 4 -0.25 0.00
 3 1 5 -97.51 0.00
 3 1 6 1.35 0.00
 3 1 7 28.31 0.00
 3 1 8 7.22 0.00
 3 1 9 -29.24 0.00
 3 1 10 -6.12 0.00
 3 1 11 6.80 0.00
 3 1 12 7.73 0.00
 3 1 13 -14.10 0.00
 3 1 14 -6.44 0.00
 3 1 15 -2.67 0.00
 3 1 16 9.12 0.00
 3 1 17 -7.92 0.00
 3 1 18 -16.82 0.00
 3 1 19 6.98 0.00
 3 3 0 -18.17 0.00
 3 3 1 -160.33 0.00
 3 3 2 19.93 0.00
 3 3 3 -2.84 0.00
 3 3 4 -46.09 0.00
 3 3 5 41.88 0.00
 3 3 6 -3.69 0.00
 3 3 7 9.01 0.00
 3 3 8 -9.88 0.00
 3 3 9 8.00 0.00
 3 3 10 2.37 0.00
 3 3 11 -0.30 0.00
 3 3 12 5.71 0.00
 3 3 13 -2.48 0.00
 3 3 14 -0.29 0.00
 3 3 15 -5.89 0.00
 3 3 16 1.52 0.00
 3 3 17 6.15 0.00
 3 3 18 -11.81 0.00
 3 3 19 3.76 0.00
 3 5 0 -31.61 0.00
 3 5 1 77.18 0.00
 3 5 2 -38.81 0.00
 3 5 3 68.61 0.00
 3 5 4 38.21 0.00
 3 5 5 -2.30 0.00
 3 5 6 2.20 0.00
 3 5 7 2.21 0.00
 3 5 8 15.56 0.00
 3 5 9 -1.40 0.00
 3 5 10 1.27 0.00
 3 5 11 -4.76 0.00
 3 5 12 3.04 0.00
 3 5 13 5.88 0.00
 3 5 14 -1.15 0.00
 3 5 15 -2.19 0.00
 3 5 16 2.34 0.00
 3 5 17 9.61 0.00
 3 5 18 1.34 0.00
 3 5 19 10.61 0.00
 3 7 0 31.82 0.00
 3 7 1 -75.22 0.00
 3 7 2 53.17 0.00
 3 7 3 -48.27 0.00
 3 7 4 -19.54 0.00
 3 7 5 5.24 0.00
 3 7 6 3.77 0.00
 3 7 7 13.78 0.00
 3 7 8 -4.76 0.00
 3 7 9 -10.99 0.00
 3 7 10 -5.42 0.00
 3 7 11 -0.64 0.00
 3 7 12 0.47 0.00
 3 7 13 -5.24 0.00
 3 7 14 -1.37 0.00
 3 7 15 -3.60 0.00
 3 7 16 3.74 0.00
 3 7 17 -2.36 0.00
 3 7 18 2.90 0.00
 3 7 19 -2.59 0.00
 3 9 0 -20.61 0.00
 3 9 1 6.24 0.00
 3 9 2 -38.29 0.00
 3 9 3 28.99 0.00
 3 9 4 -1.54 0.00
 3 9 5 52.17 0.00
 3 9 6 -3.52 0.00
 3 9 7 28.07 0.00
 3 9 8 8.41 0.00
 3 9 9 16.46 0.00
 3 9 10 -2.11 0.00
 3 9 11 6.15 0.00
 3 9 12 2.16 0.00
 3 9 13 3.28 0.00
 3 9 14 -5.84 0.00
 3 9 15 12.60 0.00
 3 9 16 0.76 0.00
 3 9 17 6.94 0.00
 3 9 18 9.19 0.00
 3 9 19 -2.07 0.00
 3 11 0 17.90 0.00
 3 11 1 14.09 0.00
 3 11 2 21.86 0.00
 3 11 3 -3.46 0.00
 3 11 4 29.23 0.00
 3 11 5 -31.49 0.00
 3 11 6 3.88 0.00
 3 11 7 -12.26 0.00
 3 11 8 5.01 0.00
 3 11 9 4.05 0.00
 3 11 10 1.20 0.00
 3 11 11 0.19 0.00
 3 11 12 3.69 0.00
 3 11 13 -0.33 0.00
 3 11 14 -7.27 0.00
 3 11 15 -7.98 0.00
 3 11 16 2.61 0.00
 3 11 17 -4.58 0.00
 3 11 18 3.24 0.00
 3 11 19 -1.31 0.00
 3 13 0 -6.74 0.00
 3 13 1 29.80 0.00
 3 13 2 1.03 0.00
 3 13 3 -8.51 0.00
 3 13 4 -20.17 0.00
 3 13 5 52.93 0.00
 3 13 6 -4.97 0.00
 3 13 7 -11.08 0.00
 3 13 8 3.09 0.00
 3 13 9 0.01 0.00
 3 13 10 -1.09 0.00
 3 13 11 6.64 0.00
 3 13 12 -6.50 0.00
 3 13 13 0.55 0.00
 3 13 14 8.13 0.00
 3 13 15 12.67 0.00
 3 13 16 -0.45 0.00
 3 13 17 -4.49 0.00
 3 13 18 -0.06 0.00
 3 15 0 20.02 0.00
 3 15 1 -1.63 0.00
 3 15 2 1.65 0.00
 3 15 3 -25.49 0.00
 3 15 4 -2.97 0.00
 3 15 5 19.07 0.00
 3 15 6 1.96 0.00
 3 15 7 9.22 0.00
 3 15 8 9.41 0.00
 3 15 9 13.62 0.00
 3 15 10 5.02 0.00
 3 15 11 2.21 0.00
 3 15 12 -0.49 0.00
 3 15 13 -0.87 0.00
 3 15 14 -1.13 0.00
 3 15 15 1.12 0.00
 3 15 16 -4.29 0.00
 3 15 17 3.01 0.00
 3 15 18 0.95 0.00
 3 17 0 15.74 0.00
 3 17 1 -9.13 0.00
 3 17 2 26.17 0.00
 3 17 3 15.53 0.00
 3 17 4 -9.09 0.00
 3 17 5 -15.55 0.00
 3 17 6 15.48 0.00
 3 17 7 -6.63 0.00
 3 17 8 -9.72 0.00
 3 17 9 -12.67 0.00
 3 17 10 5.20 0.00
 3 17 11 2.56 0.00
 3 17 12 6.07 0.00
 3 17 13 -2.80 0.00
 3 17 14 -0.37 0.00
 3 17 15 -7.11 0.00
 3 17 16 -2.53 0.00
 3 17 17 -6.83 0.00
 3 17 18 -1.86 0.00
 3 19 0 11.12 0.00
 3 19 1 0.91 0.00
 3 19 2 -35.06 0.00
 3 19 3 -12.31 0.00
 3 19 4 4.88 0.00
 3 19 5 21.43 0.00
 3 19 6 2.00 0.00
 3 19 7 -6.63 0.00
 3 19 8 -1.43 0.00
 3 19 9 2.38 0.00
 3 19 10 -6.84 0.00
 3 19 11 5.64 0.00
 3 19 12 -3.98 0.00
 3 19 13 2.88 0.00
 3 19 14 5.34 0.00
 3 19 15 -7.65 0.00
 3 19 16 3.97 0.00
 3 19 17 9.27 0.00
 3 19 18 1.41 0.00
 3 21 0 10.11 0.00
 3 21 1 11.39 0.00
 3 21 2 12.07 0.00
 3 21 3 -5.00 0.00
 3 21 4 7.59 0.00
 3 21 5 6.92 0.00
 3 21 6 1.70 0.00
 3 21 7 -6.10 0.00
 3 21 8 -0.73 0.00
 3 21 9 5.39 0.00
 3 21 10 1.45 0.00
 3 21 11 -2.94 0.00
 3 21 12 5.69 0.00
 3 21 13 3.68 0.00
 3 21 14 -7.40 0.00
 3 21 15 -8.59 0.00
 3 21 16 3.48 0.00
 3 21 17 -3.28 0.00
 3 23 0 -8.42 0.00
 3 23 1 3.53 0.00
 3 23 2 1.94 0.00
 3 23 3 7.76 0.00
 3 23 4 -6.38 0.00
 3 23 5 -18.92 0.00
 3 23 6 6.82 0.00
 3 23 7 2.00 0.00
 3 23 8 -2.95 0.00
 3 23 9 -7.63 0.00
 3 23 10 -1.65 0.00
 3 23 11 4.96 0.00
 3 23 12 -8.21 0.00
 3 23 13 -9.48 0.00
 3 23 14 3.55 0.00
 3 23 15 7.65 0.00
 3 23 16 -4.61 0.00
 3 23 17 9.82 0.00
 3 25 0 6.14 0.00
 3 25 1 3.74 0.00
 3 25 2 -10.69 0.00
 3 25 3 7.80 0.00
 3 25 4 3.70 0.00
 3 25 5 -1.52 0.00
 3 25 6 -8.69 0.00
 3 25 7 1.11 0.00
 3 25 8 -3.11 0.00
 3 25 9 11.61 0.00
 3 25 10 -5.17 0.00
 3 25 11 5.57 0.00
 3 25 12 -6.59 0.00
 3 25 13 1.96 0.00
 3 25 14 4.02 0.00
 3 25 15 -3.93 0.00
 3 25 16 3.08 0.00
 3 27 0 -9.36 0.00
 3 27 1 -1.60 0.00
 3 27 2 8.05 0.00
 3 27 3 -3.15 0.00
 3 27 4 4.48 0.00
 3 27 5 -7.38 0.00
 3 27 6 3.71 0.00
 3 27 7 -1.92 0.00
 3 27 8 7.40 0.00
 3 27 9 -6.41 0.00
 3 27 10 0.92 0.00
 3 27 11 0.63 0.00
 3 27 12 -2.35 0.00
 3 27 13 0.09 0.00
 3 27 14 -7.64 0.00
 3 27 15 0.26 0.00
 3 27 16 -6.89 0.00
 3 29 0 4.73 0.00
 3 29 1 -0.94 0.00
 3 29 2 -7.74 0.00
 3 29 3 3.76 0.00
 3 29 4 -5.75 0.00
 3 29 5 -7.51 0.00
 3 29 6 -9.69 0.00
 3 29 7 -6.95 0.00
 3 29 8 -6.46 0.00
 3 29 9 7.19 0.00
 3 29 10 2.17 0.00
 3 29 11 -7.11 0.00
 3 29 12 2.96 0.00
 3 29 13 -0.02 0.00
 3 29 14 -2.73 0.00
 3 29 15 3.10 0.00
 3 31 0 -8.63 0.00
 3 31 1 -9.32 0.00
 3 31 2 -1.83 0.00
 3 31 3 5.16 0.00
 3 31 4 3.59 0.00
 3 31 5 -3.82 0.00
 3 31 6 0.48 0.00
 3 31 7 4.71 0.00
 3 31 8 2.36 0.00
 3 31 9 7.26 0.00
 3 31 10 -2.51 0.00
 3 31 11 2.10 0.00
 3 31 12 -5.87 0.00
 3 31 13 -0.92 0.00
 3 31 14 3.18 0.00
 3 33 0 0.50 0.00
 3 33 1 12.18 0.00
 3 33 2 -4.52 0.00
 3 33 3 -12.17 0.00
 3 33 4 -2.05 0.00
 3 33 5 -3.47 0.00
 3 33 6 6.52 0.00
 3 33 7 3.41 0.00
 3 33 8 2.69 0.00
 3 33 9 -2.96 0.00
 3 33 10 -2.34 0.00
 3 33 11 4.68 0.00
 3 33 12 -3.38 0.00
 3 33 13 -6.22 0.00
 3 35 0 5.14 0.00
 3 35 1 -8.91 0.00
 3 35 2 -6.08 0.00
 3 35 3 -10.87 0.00
 3 35 4 -1.16 0.00
 3 35 5 10.91 0.00
 3 35 6 -13.78 0.00
 3 35 7 -8.27 0.00
 3 35 8 -3.60 0.00
 3 35 9 1.34 0.00
 3 35 10 8.49 0.00
 3 35 11 3.72 0.00
 3 35 12 4.68 0.00
 3 35 13 -15.34 0.00
 3 37 0 -3.99 0.00
 3 37 1 0.00 0.00
 3 37 2 3.05 0.00
 3 37 3 10.01 0.00
 3 37 4 -0.97 0.00
 3 37 5 10.14 0.00
 3 37 6 11.22 0.00
 3 37 7 -9.01 0.00
 3 37 8 -4.50 0.00
 3 37 9 11.03 0.00
 3 37 10 -2.55 0.00
 3 37 11 -1.92 0.00
 3 37 12 -11.51 0.00
 3 39 0 0.44 0.00
 3 39 1 0.84 0.00
 3 39 2 -4.55 0.00
 3 39 3 -10.16 0.00
 3 39 4 2.96 0.00
 3 39 5 -1.01 0.00
 3 39 6 -3.41 0.00
 3 39 7 1.96 0.00
 3 39 8 -1.32 0.00
 3 39 9 3.77 0.00
 3 39 10 -1.60 0.00
 3 39 11 -8.07 0.00
 3 41 0 -0.41 0.00
 3 41 1 5.85 0.00
 3 41 2 1.24 0.00
 3 41 3 1.82 0.00
 3 41 4 -2.52 0.00
 3 41 5 2.34 0.00
 3 41 6 -3.81 0.00
 3 41 7 -5.00 0.00
 3 41 8 0.16 0.00
 3 41 9 0.16 0.00
 3 41 10 0.51 0.00
 3 43 0 -2.46 0.00
 3 43 1 -5.07 0.00
 3 43 2 2.09 0.00
 3 43 3 -2.01 0.00
 3 43 4 5.41 0.00
 3 43 5 -5.43 0.00
 3 43 6 2.32 0.00
 3 43 7 1.84 0.00
 3 43 8 2.41 0.00
 3 43 9 -3.74 0.00
 3 45 0 3.72 0.00
 3 45 1 2.84 0.00
 3 45 2 -8.89 0.00
 3 45 3 -4.96 0.00
 3 45 4 -2.53 0.00
 3 45 5 -0.33 0.00
 3 45 6 -10.66 0.00
 3 45 7 4.26 0.00
 3 47 0 -0.47 0.00
 3 47 1 -5.31 0.00
 3 47 2 -3.52 0.00
 3 47 3 1.49 0.00
 3 47 4 0.46 0.00
 3 47 5 -4.92 0.00
 4 0 0 561.82 0.00
 4 0 2 291.67 0.00
 4 0 4 -61.31 0.00
 4 0 6 40.44 0.00
 4 0 8 -12.13 0.00
 4 0 10 2.63 0.00
 4 0 12 -6.70 0.00
 4 0 14 -4.27 0.00
 4 0 16 11.03 0.00
 4 0 18 -9.56 0.00
 4 2 0 -20.10 0.00
 4 2 1 15.44 0.00
 4 2 2 0.30 0.00
 4 2 3 -11.90 0.00
 4 2 4 -6.66 0.00
 4 2 5 -12.73 0.00
 4 2 6 33.43 0.00
 4 2 7 -5.45 0.00
 4 2 8 14.66 0.00
 4 2 9 -18.51 0.00
 4 2 10 -0.83 0.00
 4 2 11 -4.29 0.00
 4 2 12 0.04 0.00
 4 2 13 -2.67 0.00
 4 2 14 -1.59 0.00
 4 2 15 -2.48 0.00
 4 2 16 -2.47 0.00
 4 2 17 -15.09 0.00
 4 2 18 -4.77 0.00
 4 2 19 -17.00 0.00
 4 4 0 141.11 0.00
 4 4 1 -2.49 0.00
 4 4 2 -17.51 0.00
 4 4 3 -13.23 0.00
 4 4 4 78.06 0.00
 4 4 5 7.19 0.00
 4 4 6 9.57 0.00
 4 4 7 2.34 0.00
 4 4 8 12.86 0.00
 4 4 9 11.15 0.00
 4 4 10 -19.31 0.00
 4 4 11 9.44 0.00
 4 4 12 -7.43 0.00
 4 4 13 -2.58 0.00
 4 4 14 -6.07 0.00
 4 4 15 -8.37 0.00
 4 4 16 -0.25 0.00
 4 4 17 1.68 0.00
 4 4 18 2.10 0.00
 4 4 19 5.23 0.00
 4 6 0 138.64 0.00
 4 6 1 -0.99 0.00
 4 6 2 44.27 0.00
 4 6 3 33.48 0.00
 4 6 4 -37.89 0.00
 4 6 5 0.97 0.00
 4 6 6 -6.95 0.00
 4 6 7 -4.60 0.00
 4 6 8 3.50 0.00
 4 6 9 -13.30 0.00
 4 6 10 10.70 0.00
 4 6 11 -2.16 0.00
 4 6 12 -7.18 0.00
 4 6 13 -3.46 0.00
 4 6 14 4.96 0.00
 4 6 15 -5.20 0.00
 4 6 16 -3.66 0.00
 4 6 17 -1.09 0.00
 4 6 18 2.01 0.00
 4 6 19 -1.70 0.00
 4 8 0 -46.91 0.00
 4 8 1 -3.76 0.00
 4 8 2 -140.68 0.00
 4 8 3 -15.13 0.00
 4 8 4 55.48 0.00
 4 8 5 -14.62 0.00
 4 8 6 -16.97 0.00
 4 8 7 -8.97 0.00
 4 8 8 6.00 0.00
 4 8 9 6.55 0.00
 4 8 10 15.11 0.00
 4 8 11 1.54 0.00
 4 8 12 -6.05 0.00
 4 8 13 -3.94 0.00
 4 8 14 0.15 0.00
 4 8 15 -3.41 0.00
 4 8 16 0.09 0.00
 4 8 17 -1.53 0.00
 4 8 18 7.64 0.00
 4 8 19 -0.32 0.00
 4 10 0 44.90 0.00
 4 10 1 -17.94 0.00
 4 10 2 32.60 0.00
 4 10 3 12.60 0.00
 4 10 4 48.34 0.00
 4 10 5 25.81 0.00
 4 10 6 -17.20 0.00
 4 10 7 -2.66 0.00
 4 10 8 9.74 0.00
 4 10 9 7.38 0.00
 4 10 10 -4.82 0.00
 4 10 11 -2.85 0.00
 4 10 12 -3.65 0.00
 4 10 13 4.77 0.00
 4 10 14 9.15 0.00
 4 10 15 -2.26 0.00
 4 10 16 -4.15 0.00
 4 10 17 11.54 0.00
 4 10 18 0.29 0.00
 4 10 19 5.39 0.00
 4 12 0 -30.54 0.00
 4 12 1 5.21 0.00
 4 12 2 -50.06 0.00
 4 12 3 9.65 0.00
 4 12 4 -3.54 0.00
 4 12 5 -12.69 0.00
 4 12 6 -5.26 0.00
 4 12 7 -11.22 0.00
 4 12 8 -2.56 0.00
 4 12 9 -2.77 0.00
 4 12 10 0.19 0.00
 4 12 11 -6.94 0.00
 4 12 12 -1.43 0.00
 4 12 13 -7.79 0.00
 4 12 14 -11.52 0.00
 4 12 15 3.32 0.00
 4 12 16 -1.71 0.00
 4 12 17 -4.59 0.00
 4 12 18 0.51 0.00
 4 12 19 -9.59 0.00
 4 14 0 28.67 0.00
 4 14 1 -15.42 0.00
 4 14 2 -12.69 0.00
 4 14 3 11.80 0.00
 4 14 4 -21.02 0.00
 4 14 5 -3.00 0.00
 4 14 6 -18.79 0.00
 4 14 7 -7.52 0.00
 4 14 8 1.71 0.00
 4 14 9 9.50 0.00
 4 14 10 8.52 0.00
 4 14 11 10.30 0.00
 4 14 12 -0.50 0.00
 4 14 13 4.55 0.00
 4 14 14 -2.08 0.00
 4 14 15 0.05 0.00
 4 14 16 -1.63 0.00
 4 14 17 -1.55 0.00
 4 14 18 6.85 0.00
 4 16 0 -22.60 0.00
 4 16 1 8.60 0.00
 4 16 2 8.80 0.00
 4 16 3 0.90 0.00
 4 16 4 11.52 0.00
 4 16 5 11.80 0.00
 4 16 6 24.63 0.00
 4 16 7 10.78 0.00
 4 16 8 -24.41 0.00
 4 16 9 -2.86 0.00
 4 16 10 -6.18 0.00
 4 16 11 -3.93 0.00
 4 16 12 -6.41 0.00
 4 16 13 0.56 0.00
 4 16 14 -0.88 0.00
 4 16 15 2.21 0.00
 4 16 16 1.18 0.00
 4 16 17 7.76 0.00
 4 16 18 -7.86 0.00
 4 18 0 2.70 0.00
 4 18 1 2.14 0.00
 4 18 2 -28.61 0.00
 4 18 3 -8.39 0.00
 4 18 4 -23.96 0.00
 4 18 5 -4.20 0.00
 4 18 6 -12.35 0.00
 4 18 7 -6.00 0.00
 4 18 8 -5.62 0.00
 4 18 9 -0.74 0.00
 4 18 10 3.16 0.00
 4 18 11 -1.79 0.00
 4 18 12 3.33 0.00
 4 18 13 -5.27 0.00
 4 18 14 0.01 0.00
 4 18 15 -7.85 0.00
 4 18 16 0.01 0.00
 4 18 17 -4.08 0.00
 4 18 18 1.33 0.00
 4 20 0 -12.96 0.00
 4 20 1 -9.25 0.00
 4 20 2 0.23 0.00
 4 20 3 9.81 0.00
 4 20 4 -14.14 0.00
 4 20 5 11.51 0.00
 4 20 6 1.11 0.00
 4 20 7 1.28 0.00
 4 20 8 6.54 0.00
 4 20 9 -4.82 0.00
 4 20 10 -1.65 0.00
 4 20 11 1.87 0.00
 4 20 12 -12.03 0.00
 4 20 13 9.96 0.00
 4 20 14 1.89 0.00
 4 20 15 1.39 0.00
 4 20 16 -2.47 0.00
 4 20 17 -1.43 0.00
 4 22 0 -17.76 0.00
 4 22 1 14.26 0.00
 4 22 2 12.28 0.00
 4 22 3 -1.88 0.00
 4 22 4 7.88 0.00
 4 22 5 -4.51 0.00
 4 22 6 2.52 0.00
 4 22 7 4.15 0.00
 4 22 8 0.44 0.00
 4 22 9 -0.67 0.00
 4 22 10 -3.80 0.00
 4 22 11 0.86 0.00
 4 22 12 6.10 0.00
 4 22 13 -3.77 0.00
 4 22 14 -4.66 0.00
 4 22 15 5.01 0.00
 4 22 16 -0.66 0.00
 4 22 17 0.84 0.00
 4 24 0 -12.43 0.00
 4 24 1 -2.72 0.00
 4 24 2 -0.03 0.00
 4 24 3 0.08 0.00
 4 24 4 -24.88 0.00
 4 24 5 6.53 0.00
 4 24 6 -0.17 0.00
 4 24 7 2.40 0.00
 4 24 8 0.45 0.00
 4 24 9 -6.72 0.00
 4 24 10 2.55 0.00
 4 24 11 -3.82 0.00
 4 24 12 -0.46 0.00
 4 24 13 -8.36 0.00
 4 24 14 1.29 0.00
 4 24 15 4.11 0.00
 4 24 16 -2.72 0.00
 4 24 17 -12.89 0.00
 4 26 0 8.14 0.00
 4 26 1 -6.60 0.00
 4 26 2 11.79 0.00
 4 26 3 6.38 0.00
 4 26 4 0.91 0.00
 4 26 5 -6.55 0.00
 4 26 6 6.74 0.00
 4 26 7 0.24 0.00
 4 26 8 6.38 0.00
 4 26 9 5.19 0.00
 4 26 10 -1.27 0.00
 4 26 11 9.61 0.00
 4 26 12 -1.49 0.00
 4 26 13 8.67 0.00
 4 26 14 2.34 0.00
 4 26 15 0.92 0.00
 4 26 16 -2.18 0.00
 4 28 0 1.46 0.00
 4 28 1 -1.68 0.00
 4 28 2 1.15 0.00
 4 28 3 3.03 0.00
 4 28 4 2.92 0.00
 4 28 5 -1.22 0.00
 4 28 6 -0.94 0.00
 4 28 7 -2.18 0.00
 4 28 8 -2.76 0.00
 4 28 9 -10.27 0.00
 4 28 10 6.96 0.00
 4 28 11 -10.89 0.00
 4 28 12 5.77 0.00
 4 28 13 -9.53 0.00
 4 28 14 -0.07 0.00
 4 28 15 -2.45 0.00
 4 30 0 11.66 0.00
 4 30 1 -12.42 0.00
 4 30 2 -7.00 0.00
 4 30 3 4.55 0.00
 4 30 4 1.38 0.00
 4 30 5 -3.87 0.00
 4 30 6 -14.18 0.00
 4 30 7 4.78 0.00
 4 30 8 -3.78 0.00
 4 30 9 13.87 0.00
 4 30 10 2.96 0.00
 4 30 11 2.98 0.00
 4 30 12 -5.49 0.00
 4 30 13 -0.17 0.00
 4 30 14 3.75 0.00
 4 30 15 -2.32 0.00
 4 32 0 10.66 0.00
 4 32 1 3.32 0.00
 4 32 2 10.91 0.00
 4 32 3 -3.81 0.00
 4 32 4 0.09 0.00
 4 32 5 -8.25 0.00
 4 32 6 0.75 0.00
 4 32 7 -6.86 0.00
 4 32 8 -5.43 0.00
 4 32 9 6.58 0.00
 4 32 10 9.45 0.00
 4 32 11 -8.64 0.00
 4 32 12 3.11 0.00
 4 32 13 4.71 0.00
 4 32 14 -1.74 0.00
 4 34 0 -0.24 0.00
 4 34 1 -5.69 0.00
 4 34 2 10.26 0.00
 4 34 3 3.99 0.00
 4 34 4 3.78 0.00
 4 34 5 4.73 0.00
 4 34 6 3.20 0.00
 4 34 7 -6.25 0.00
 4 34 8 8.14 0.00
 4 34 9 -6.72 0.00
 4 34 10 -14.26 0.00
 4 34 11 0.75 0.00
 4 34 12 2.19 0.00
 4 34 13 -10.11 0.00
 4 36 0 -40.41 0.00
 4 36 1 0.75 0.00
 4 36 2 -1.48 0.00
 4 36 3 -9.30 0.00
 4 36 4 3.17 0.00
 4 36 5 -1.44 0.00
 4 36 6 -4.04 0.00
 4 36 7 2.10 0.00
 4 36 8 3.55 0.00
 4 36 9 2.00 0.00
 4 36 10 0.44 0.00
 4 36 11 0.02 0.00
 4 36 12 -9.87 0.00
 4 38 0 -3.84 0.00
 4 38 1 5.33 0.00
 4 38 2 6.13 0.00
 4 38 3 4.03 0.00
 4 38 4 -3.95 0.00
 4 38 5 -0.18 0.00
 4 38 6 -6.97 0.00
 4 38 7 -6.90 0.00
 4 38 8 2.28 0.00
 4 38 9 0.85 0.00
 4 38 10 -17.41 0.00
 4 38 11 3.50 0.00
 4 40 0 -16.27 0.00
 4 40 1 -2.47 0.00
 4 40 2 -5.19 0.00
 4 40 3 9.97 0.00
 4 40 4 -2.16 0.00
 4 40 5 0.79 0.00
 4 40 6 4.65 0.00
 4 40 7 1.19 0.00
 4 40 8 0.73 0.00
 4 40 9 1.03 0.00
 4 40 10 -15.88 0.00
 4 40 11 -2.56 0.00
 4 42 0 13.01 0.00
 4 42 1 -0.30 0.00
 4 42 2 1.38 0.00
 4 42 3 -4.01 0.00
 4 42 4 2.76 0.00
 4 42 5 -1.59 0.00
 4 42 6 -5.69 0.00
 4 42 7 1.36 0.00
 4 42 8 4.83 0.00
 4 42 9 -0.32 0.00
 4 44 0 10.03 0.00
 4 44 1 1.71 0.00
 4 44 2 7.11 0.00
 4 44 3 4.59 0.00
 4 44 4 -0.25 0.00
 4 44 5 -2.50 0.00
 4 44 6 5.53 0.00
 4 44 7 4.54 0.00
 4 44 8 2.86 0.00
 4 46 0 4.07 0.00
 4 46 1 1.25 0.00
 4 46 2 -1.91 0.00
 4 46 3 -3.70 0.00
 4 46 4 0.59 0.00
 4 46 5 3.07 0.00
 4 46 6 -1.41 0.00
 4 48 0 -2.61 0.00
 4 48 1 7.75 0.00
 4 48 2 11.54 0.00
 5 1 0 -20.88 0.00
 5 1 1 75.37 0.00
 5 1 2 28.02 0.00
 5 1 3 -180.88 0.00
 5 1 4 -3.44 0.00
 5 1 5 24.65 0.00
 5 1 6 -1.56 0.00
 5 1 7 -45.02 0.00
 5 1 8 4.05 0.00
 5 1 9 0.50 0.00
 5 1 10 -0.73 0.00
 5 1 11 -2.23 0.00
 5 1 12 1.62 0.00
 5 1 13 1.54 0.00
 5 1 14 -14.78 0.00
 5 1 15 -0.58 0.00
 5 1 16 15.52 0.00
 5 1 17 -3.27 0.00
 5 1 18 -15.51 0.00
 5 1 19 -11.09 0.00
 5 3 0 6.13 0.00
 5 3 1 -49.91 0.00
 5 3 2 -6.82 0.00
 5 3 3 1.05 0.00
 5 3 4 -26.91 0.00
 5 3 5 -5.55 0.00
 5 3 6 -8.46 0.00
 5 3 7 40.63 0.00
 5 3 8 -3.77 0.00
 5 3 9 4.60 0.00
 5 3 10 8.08 0.00
 5 3 11 -1.03 0.00
 5 3 12 4.93 0.00
 5 3 13 -4.76 0.00
 5 3 14 0.40 0.00
 5 3 15 -8.36 0.00
 5 3 16 -1.40 0.00
 5 3 17 6.78 0.00
 5 3 18 -12.68 0.00
 5 3 19 7.23 0.00
 5 5 0 12.53 0.00
 5 5 1 -240.50 0.00
 5 5 2 -12.98 0.00
 5 5 3 195.34 0.00
 5 5 4 22.26 0.00
 5 5 5 -38.28 0.00
 5 5 6 15.13 0.00
 5 5 7 17.21 0.00
 5 5 8 8.41 0.00
 5 5 9 -12.81 0.00
 5 5 10 -5.54 0.00
 5 5 11 6.87 0.00
 5 5 12 3.45 0.00
 5 5 13 3.59 0.00
 5 5 14 -4.30 0.00
 5 5 15 5.07 0.00
 5 5 16 1.18 0.00
 5 5 17 12.69 0.00
 5 5 18 5.41 0.00
 5 5 19 -0.24 0.00
 5 7 0 22.23 0.00
 5 7 1 -55.69 0.00
 5 7 2 15.59 0.00
 5 7 3 -46.95 0.00
 5 7 4 6.26 0.00
 5 7 5 -1.10 0.00
 5 7 6 -28.70 0.00
 5 7 7 10.02 0.00
 5 7 8 12.94 0.00
 5 7 9 5.40 0.00
 5 7 10 -1.99 0.00
 5 7 11 -7.27 0.00
 5 7 12 3.79 0.00
 5 7 13 -4.08 0.00
 5 7 14 -4.12 0.00
 5 7 15 -10.49 0.00
 5 7 16 3.28 0.00
 5 7 17 1.02 0.00
 5 7 18 -0.36 0.00
 5 7 19 7.89 0.00
 5 9 0 -39.06 0.00
 5 9 1 -12.40 0.00
 5 9 2 7.35 0.00
 5 9 3 14.29 0.00
 5 9 4 -10.33 0.00
 5 9 5 50.26 0.00
 5 9 6 16.19 0.00
 5 9 7 3.22 0.00
 5 9 8 -5.91 0.00
 5 9 9 27.52 0.00
 5 9 10 -5.30 0.00
 5 9 11 6.20 0.00
 5 9 12 -2.96 0.00
 5 9 13 8.63 0.00
 5 9 14 -3.01 0.00
 5 9 15 11.25 0.00
 5 9 16 8.97 0.00
 5 9 17 4.54 0.00
 5 9 18 2.80 0.00
 5 9 19 2.24 0.00
 5 11 0 31.06 0.00
 5 11 1 47.40 0.00
 5 11 2 0.39 0.00
 5 11 3 -25.05 0.00
 5 11 4 13.17 0.00
 5 11 5 10.28 0.00
 5 11 6 5.68 0.00
 5 11 7 -9.32 0.00
 5 11 8 9.98 0.00
 5 11 9 -2.90 0.00
 5 11 10 8.80 0.00
 5 11 11 -0.64 0.00
 5 11 12 -0.36 0.00
 5 11 13 -8.02 0.00
 5 11 14 -2.71 0.00
 5 11 15 1.72 0.00
 5 11 16 -1.97 0.00
 5 11 17 -5.78 0.00
 5 11 18 -1.26 0.00
 5 11 19 4.51 0.00
 5 13 0 -13.47 0.00
 5 13 1 -22.18 0.00
 5 13 2 8.32 0.00
 5 13 3 1.05 0.00
 5 13 4 1.83 0.00
 5 13 5 -8.11 0.00
 5 13 6 -5.43 0.00
 5 13 7 -2.14 0.00
 5 13 8 -7.69 0.00
 5 13 9 5.00 0.00
 5 13 10 -2.38 0.00
 5 13 11 6.83 0.00
 5 13 12 -4.44 0.00
 5 13 13 2.96 0.00
 5 13 14 6.11 0.00
 5 13 15 2.87 0.00
 5 13 16 -1.06 0.00
 5 13 17 -4.08 0.00
 5 13 18 -1.37 0.00
 5 15 0 10.09 0.00
 5 15 1 13.36 0.00
 5 15 2 -2.09 0.00
 5 15 3 5.73 0.00
 5 15 4 -16.19 0.00
 5 15 5 32.36 0.00
 5 15 6 10.17 0.00
 5 15 7 17.90 0.00
 5 15 8 13.21 0.00
 5 15 9 -0.55 0.00
 5 15 10 7.06 0.00
 5 15 11 0.11 0.00
 5 15 12 4.61 0.00
 5 15 13 4.38 0.00
 5 15 14 -7.22 0.00
 5 15 15 1.01 0.00
 5 15 16 0.24 0.00
 5 15 17 7.32 0.00
 5 15 18 7.33 0.00
 5 17 0 42.39 0.00
 5 17 1 22.48 0.00
 5 17 2 4.43 0.00
 5 17 3 -41.58 0.00
 5 17 4 16.49 0.00
 5 17 5 0.12 0.00
 5 17 6 -1.75 0.00
 5 17 7 -24.61 0.00
 5 17 8 -1.15 0.00
 5 17 9 0.62 0.00
 5 17 10 -0.06 0.00
 5 17 11 -4.94 0.00
 5 17 12 1.16 0.00
 5 17 13 -4.16 0.00
 5 17 14 3.62 0.00
 5 17 15 -6.75 0.00
 5 17 16 1.13 0.00
 5 17 17 -5.43 0.00
 5 17 18 -5.74 0.00
 5 19 0 -21.39 0.00
 5 19 1 -5.52 0.00
 5 19 2 -8.51 0.00
 5 19 3 22.48 0.00
 5 19 4 -11.90 0.00
 5 19 5 -3.16 0.00
 5 19 6 7.46 0.00
 5 19 7 18.11 0.00
 5 19 8 -7.14 0.00
 5 19 9 -4.20 0.00
 5 19 10 1.21 0.00
 5 19 11 10.01 0.00
 5 19 12 -1.12 0.00
 5 19 13 0.02 0.00
 5 19 14 2.32 0.00
 5 19 15 -0.41 0.00
 5 19 16 4.76 0.00
 5 19 17 -2.93 0.00
 5 19 18 -1.60 0.00
 5 21 0 30.80 0.00
 5 21 1 -7.22 0.00
 5 21 2 -2.09 0.00
 5 21 3 0.64 0.00
 5 21 4 1.71 0.00
 5 21 5 -7.86 0.00
 5 21 6 10.76 0.00
 5 21 7 7.49 0.00
 5 21 8 -0.95 0.00
 5 21 9 -9.85 0.00
 5 21 10 2.67 0.00
 5 21 11 -0.55 0.00
 5 21 12 3.21 0.00
 5 21 13 -5.81 0.00
 5 21 14 -1.65 0.00
 5 21 15 -1.18 0.00
 5 21 16 0.16 0.00
 5 21 17 7.34 0.00
 5 23 0 -9.64 0.00
 5 23 1 15.20 0.00
 5 23 2 3.31 0.00
 5 23 3 -6.04 0.00
 5 23 4 6.25 0.00
 5 23 5 -5.08 0.00
 5 23 6 -4.21 0.00
 5 23 7 -7.27 0.00
 5 23 8 -1.25 0.00
 5 23 9 5.75 0.00
 5 23 10 -11.09 0.00
 5 23 11 -1.01 0.00
 5 23 12 -2.65 0.00
 5 23 13 -0.52 0.00
 5 23 14 -1.99 0.00
 5 23 15 -5.15 0.00
 5 23 16 2.77 0.00
 5 23 17 -1.86 0.00
 5 25 0 -17.68 0.00
 5 25 1 5.69 0.00
 5 25 2 5.79 0.00
 5 25 3 7.67 0.00
 5 25 4 -18.89 0.00
 5 25 5 -1.40 0.00
 5 25 6 2.15 0.00
 5 25 7 0.87 0.00
 5 25 8 -1.83 0.00
 5 25 9 4.62 0.00
 5 25 10 -2.23 0.00
 5 25 11 5.90 0.00
 5 25 12 5.11 0.00
 5 25 13 -3.13 0.00
 5 25 14 5.50 0.00
 5 25 15 3.00 0.00
 5 25 16 0.41 0.00
 5 27 0 9.56 0.00
 5 27 1 -11.21 0.00
 5 27 2 0.23 0.00
 5 27 3 8.74 0.00
 5 27 4 6.73 0.00
 5 27 5 -13.12 0.00
 5 27 6 2.89 0.00
 5 27 7 2.65 0.00
 5 27 8 2.26 0.00
 5 27 9 -1.32 0.00
 5 27 10 0.95 0.00
 5 27 11 -3.83 0.00
 5 27 12 -5.66 0.00
 5 27 13 0.37 0.00
 5 27 14 -16.97 0.00
 5 27 15 -4.96 0.00
 5 27 16 -10.39 0.00
 5 29 0 -12.34 0.00
 5 29 1 -4.13 0.00
 5 29 2 -4.95 0.00
 5 29 3 10.02 0.00
 5 29 4 0.03 0.00
 5 29 5 -9.94 0.00
 5 29 6 -17.57 0.00
 5 29 7 -12.48 0.00
 5 29 8 0.84 0.00
 5 29 9 7.93 0.00
 5 29 10 -3.32 0.00
 5 29 11 -1.51 0.00
 5 29 12 8.28 0.00
 5 29 13 1.18 0.00
 5 29 14 5.14 0.00
 5 29 15 1.19 0.00
 5 31 0 6.26 0.00
 5 31 1 0.87 0.00
 5 31 2 -4.87 0.00
 5 31 3 -0.54 0.00
 5 31 4 -1.07 0.00
 5 31 5 -0.71 0.00
 5 31 6 1.95 0.00
 5 31 7 2.55 0.00
 5 31 8 4.19 0.00
 5 31 9 0.61 0.00
 5 31 10 1.31 0.00
 5 31 11 -1.68 0.00
 5 31 12 -8.49 0.00
 5 31 13 -5.08 0.00
 5 31 14 -11.63 0.00
 5 33 0 -1.43 0.00
 5 33 1 -9.48 0.00
 5 33 2 -0.77 0.00
 5 33 3 -3.95 0.00
 5 33 4 0.90 0.00
 5 33 5 1.25 0.00
 5 33 6 3.35 0.00
 5 33 7 1.59 0.00
 5 33 8 -5.11 0.00
 5 33 9 13.93 0.00
 5 33 10 4.71 0.00
 5 33 11 -0.65 0.00
 5 33 12 -1.49 0.00
 5 33 13 -4.66 0.00
 5 35 0 0.62 0.00
 5 35 1 -11.65 0.00
 5 35 2 -0.33 0.00
 5 35 3 -7.34 0.00
 5 35 4 -11.37 0.00
 5 35 5 6.06 0.00
 5 35 6 -5.94 0.00
 5 35 7 -13.15 0.00
 5 35 8 4.06 0.00
 5 35 9 -8.31 0.00
 5 35 10 2.87 0.00
 5 35 11 7.11 0.00
 5 35 12 0.53 0.00
 5 37 0 8.67 0.00
 5 37 1 8.07 0.00
 5 37 2 -3.53 0.00
 5 37 3 -3.82 0.00
 5 37 4 7.03 0.00
 5 37 5 11.64 0.00
 5 37 6 5.19 0.00
 5 37 7 13.81 0.00
 5 37 8 -5.99 0.00
 5 37 9 9.29 0.00
 5 37 10 -0.20 0.00
 5 37 11 -9.03 0.00
 5 37 12 -10.63 0.00
 5 39 0 -6.35 0.00
 5 39 1 -8.70 0.00
 5 39 2 8.29 0.00
 5 39 3 -3.83 0.00
 5 39 4 -5.14 0.00
 5 39 5 -0.15 0.00
 5 39 6 -0.95 0.00
 5 39 7 -5.35 0.00
 5 39 8 -1.76 0.00
 5 39 9 -10.51 0.00
 5 39 10 -5.03 0.00
 5 39 11 6.86 0.00
 5 41 0 4.43 0.00
 5 41 1 -8.00 0.00
 5 41 2 -1.68 0.00
 5 41 3 3.22 0.00
 5 41 4 1.00 0.00
 5 41 5 0.46 0.00
 5 41 6 -3.19 0.00
 5 41 7 -3.43 0.00
 5 41 8 1.92 0.00
 5 41 9 5.11 0.00
 5 41 10 3.24 0.00
 5 43 0 7.66 0.00
 5 43 1 -1.72 0.00
 5 43 2 -1.25 0.00
 5 43 3 -4.32 0.00
 5 43 4 5.12 0.00
 5 43 5 -3.52 0.00
 5 43 6 -1.76 0.00
 5 43 7 0.39 0.00
 5 43 8 -2.20 0.00
 5 45 0 -4.77 0.00
 5 45 1 0.14 0.00
 5 45 2 -0.07 0.00
 5 45 3 -6.74 0.00
 5 45 4 -6.97 0.00
 5 45 5 -2.90 0.00
 5 45 6 3.08 0.00
 5 45 7 4.05 0.00
 5 47 0 4.96 0.00
 5 47 1 -5.16 0.00
 5 47 2 -2.66 0.00
 5 47 3 5.16 0.00
 5 47 4 -0.22 0.00
 6 0 0 112.26 0.00
 6 0 2 109.16 0.00
 6 0 4 39.05 0.00
 6 0 6 22.47 0.00
 6 0 8 17.40 0.00
 6 0 10 -43.35 0.00
 6 0 12 2.53 0.00
 6 0 14 0.28 0.00
 6 0 16 15.68 0.00
 6 0 18 4.57 0.00
 6 2 0 54.52 0.00
 6 2 1 0.48 0.00
 6 2 2 103.94 0.00
 6 2 3 16.68 0.00
 6 2 4 -78.48 0.00
 6 2 5 -18.69 0.00
 6 2 6 10.92 0.00
 6 2 7 -5.88 0.00
 6 2 8 18.52 0.00
 6 2 9 -12.46 0.00
 6 2 10 13.68 0.00
 6 2 11 -3.90 0.00
 6 2 12 5.33 0.00
 6 2 13 -2.23 0.00
 6 2 14 -1.91 0.00
 6 2 15 -3.16 0.00
 6 2 16 -6.03 0.00
 6 2 17 -7.82 0.00
 6 2 18 -11.67 0.00
 6 2 19 -9.20 0.00
 6 4 0 -19.70 0.00
 6 4 1 23.99 0.00
 6 4 2 -10.12 0.00
 6 4 3 -28.77 0.00
 6 4 4 1.15 0.00
 6 4 5 13.67 0.00
 6 4 6 44.07 0.00
 6 4 7 -4.08 0.00
 6 4 8 -17.74 0.00
 6 4 9 7.69 0.00
 6 4 10 -7.10 0.00
 6 4 11 6.32 0.00
 6 4 12 -26.17 0.00
 6 4 13 2.41 0.00
 6 4 14 5.54 0.00
 6 4 15 -8.34 0.00
 6 4 16 1.25 0.00
 6 4 17 -6.44 0.00
 6 4 18 5.80 0.00
 6 4 19 -12.66 0.00
 6 6 0 62.23 0.00
 6 6 1 11.44 0.00
 6 6 2 -6.11 0.00
 6 6 3 16.02 0.00
 6 6 4 20.40 0.00
 6 6 5 8.86 0.00
 6 6 6 -42.76 0.00
 6 6 7 -23.72 0.00
 6 6 8 25.67 0.00
 6 6 9 -6.93 0.00
 6 6 10 3.30 0.00
 6 6 11 -0.08 0.00
 6 6 12 4.95 0.00
 6 6 13 2.68 0.00
 6 6 14 -6.63 0.00
 6 6 15 -7.97 0.00
 6 6 16 -2.94 0.00
 6 6 17 4.93 0.00
 6 6 18 -5.67 0.00
 6 6 19 8.99 0.00
 6 8 0 -50.06 0.00
 6 8 1 -4.58 0.00
 6 8 2 -27.93 0.00
 6 8 3 -7.90 0.00
 6 8 4 -8.50 0.00
 6 8 5 1.80 0.00
 6 8 6 -7.52 0.00
 6 8 7 7.17 0.00
 6 8 8 -1.09 0.00
 6 8 9 -3.53 0.00
 6 8 10 -0.81 0.00
 6 8 11 -1.66 0.00
 6 8 12 4.02 0.00
 6 8 13 -4.71 0.00
 6 8 14 3.49 0.00
 6 8 15 -12.53 0.00
 6 8 16 7.35 0.00
 6 8 17 -4.46 0.00
 6 8 18 3.13 0.00
 6 8 19 -4.35 0.00
 6 10 0 13.21 0.00
 6 10 1 0.04 0.00
 6 10 2 -40.85 0.00
 6 10 3 12.30 0.00
 6 10 4 45.13 0.00
 6 10 5 1.49 0.00
 6 10 6 3.46 0.00
 6 10 7 -12.15 0.00
 6 10 8 -0.75 0.00
 6 10 9 7.08 0.00
 6 10 10 7.06 0.00
 6 10 11 6.39 0.00
 6 10 12 -8.82 0.00
 6 10 13 3.58 0.00
 6 10 14 -8.08 0.00
 6 10 15 6.55 0.00
 6 10 16 -1.33 0.00
 6 10 17 4.52 0.00
 6 10 18 3.28 0.00
 6 10 19 -0.33 0.00
 6 12 0 14.40 0.00
 6 12 1 -10.75 0.00
 6 12 2 0.32 0.00
 6 12 3 -2.03 0.00
 6 12 4 -20.09 0.00
 6 12 5 12.84 0.00
 6 12 6 -2.88 0.00
 6 12 7 -11.91 0.00
 6 12 8 -13.46 0.00
 6 12 9 1.16 0.00
 6 12 10 3.91 0.00
 6 12 11 -7.26 0.00
 6 12 12 3.04 0.00
 6 12 13 -9.45 0.00
 6 12 14 0.75 0.00
 6 12 15 1.07 0.00
 6 12 16 2.44 0.00
 6 12 17 -2.88 0.00
 6 12 18 -2.41 0.00
 6 14 0 -38.29 0.00
 6 14 1 13.14 0.00
 6 14 2 -32.92 0.00
 6 14 3 4.80 0.00
 6 14 4 0.02 0.00
 6 14 5 -3.28 0.00
 6 14 6 8.39 0.00
 6 14 7 -4.85 0.00
 6 14 8 -2.24 0.00
 6 14 9 11.30 0.00
 6 14 10 2.77 0.00
 6 14 11 -6.66 0.00
 6 14 12 -8.73 0.00
 6 14 13 8.64 0.00
 6 14 14 -3.70 0.00
 6 14 15 -2.54 0.00
 6 14 16 -4.63 0.00
 6 14 17 -5.64 0.00
 6 14 18 -1.15 0.00
 6 16 0 66.25 0.00
 6 16 1 -21.94 0.00
 6 16 2 -3.50 0.00
 6 16 3 25.11 0.00
 6 16 4 7.35 0.00
 6 16 5 -3.45 0.00
 6 16 6 -12.83 0.00
 6 16 7 10.74 0.00
 6 16 8 -16.51 0.00
 6 16 9 -3.69 0.00
 6 16 10 -4.40 0.00
 6 16 11 5.34 0.00
 6 16 12 1.90 0.00
 6 16 13 -0.26 0.00
 6 16 14 0.80 0.00
 6 16 15 3.41 0.00
 6 16 16 -0.98 0.00
 6 16 17 8.75 0.00
 6 16 18 1.03 0.00
 6 18 0 -52.43 0.00
 6 18 1 2.03 0.00
 6 18 2 -23.71 0.00
 6 18 3 -16.48 0.00
 6 18 4 -27.86 0.00
 6 18 5 6.20 0.00
 6 18 6 19.87 0.00
 6 18 7 -7.39 0.00
 6 18 8 2.53 0.00
 6 18 9 -2.83 0.00
 6 18 10 2.34 0.00
 6 18 11 -5.00 0.00
 6 18 12 -5.82 0.00
 6 18 13 -5.23 0.00
 6 18 14 5.40 0.00
 6 18 15 -7.07 0.00
 6 18 16 -0.61 0.00
 6 18 17 -5.58 0.00
 6 18 18 -6.34 0.00
 6 20 0 7.59 0.00
 6 20 1 17.01 0.00
 6 20 2 9.17 0.00
 6 20 3 0.50 0.00
 6 20 4 -3.16 0.00
 6 20 5 7.52 0.00
 6 20 6 -6.38 0.00
 6 20 7 2.66 0.00
 6 20 8 -8.45 0.00
 6 20 9 5.55 0.00
 6 20 10 -2.51 0.00
 6 20 11 0.30 0.00
 6 20 12 -1.84 0.00
 6 20 13 9.99 0.00
 6 20 14 -7.59 0.00
 6 20 15 5.48 0.00
 6 20 16 -2.20 0.00
 6 20 17 0.85 0.00
 6 22 0 -3.10 0.00
 6 22 1 -15.18 0.00
 6 22 2 -3.89 0.00
 6 22 3 3.90 0.00
 6 22 4 0.65 0.00
 6 22 5 5.82 0.00
 6 22 6 -11.89 0.00
 6 22 7 0.89 0.00
 6 22 8 10.41 0.00
 6 22 9 -6.96 0.00
 6 22 10 -0.21 0.00
 6 22 11 -0.10 0.00
 6 22 12 -0.69 0.00
 6 22 13 -6.94 0.00
 6 22 14 -2.36 0.00
 6 22 15 1.68 0.00
 6 22 16 2.21 0.00
 6 22 17 2.01 0.00
 6 24 0 -18.32 0.00
 6 24 1 2.85 0.00
 6 24 2 -6.07 0.00
 6 24 3 -2.46 0.00
 6 24 4 -7.82 0.00
 6 24 5 -8.52 0.00
 6 24 6 4.51 0.00
 6 24 7 -6.22 0.00
 6 24 8 4.99 0.00
 6 24 9 1.20 0.00
 6 24 10 0.09 0.00
 6 24 11 2.45 0.00
 6 24 12 4.24 0.00
 6 24 13 -2.19 0.00
 6 24 14 -0.02 0.00
 6 24 15 -0.52 0.00
 6 24 16 -2.54 0.00
 6 26 0 7.02 0.00
 6 26 1 1.28 0.00
 6 26 2 18.51 0.00
 6 26 3 3.02 0.00
 6 26 4 -3.49 0.00
 6 26 5 5.57 0.00
 6 26 6 0.74 0.00
 6 26 7 6.82 0.00
 6 26 8 1.93 0.00
 6 26 9 3.17 0.00
 6 26 10 0.13 0.00
 6 26 11 3.82 0.00
 6 26 12 -4.04 0.00
 6 26 13 3.34 0.00
 6 26 14 5.70 0.00
 6 26 15 2.59 0.00
 6 26 16 -2.52 0.00
 6 28 0 4.76 0.00
 6 28 1 -7.45 0.00
 6 28 2 -7.35 0.00
 6 28 3 2.55 0.00
 6 28 4 0.65 0.00
 6 28 5 -5.89 0.00
 6 28 6 -5.64 0.00
 6 28 7 -8.50 0.00
 6 28 8 1.37 0.00
 6 28 9 -6.83 0.00
 6 28 10 1.87 0.00
 6 28 11 -13.38 0.00
 6 28 12 2.02 0.00
 6 28 13 -10.60 0.00
 6 28 14 -1.87 0.00
 6 28 15 -4.70 0.00
 6 30 0 9.33 0.00
 6 30 1 -7.61 0.00
 6 30 2 -4.62 0.00
 6 30 3 4.50 0.00
 6 30 4 1.44 0.00
 6 30 5 -4.32 0.00
 6 30 6 -2.79 0.00
 6 30 7 4.31 0.00
 6 30 8 0.94 0.00
 6 30 9 12.36 0.00
 6 30 10 -1.01 0.00
 6 30 11 5.61 0.00
 6 30 12 7.20 0.00
 6 30 13 3.68 0.00
 6 30 14 0.88 0.00
 6 32 0 6.10 0.00
 6 32 1 -10.29 0.00
 6 32 2 19.97 0.00
 6 32 3 0.95 0.00
 6 32 4 2.40 0.00
 6 32 5 3.83 0.00
 6 32 6 -8.14 0.00
 6 32 7 -7.48 0.00
 6 32 8 -5.04 0.00
 6 32 9 -8.97 0.00
 6 32 10 0.68 0.00
 6 32 11 -1.86 0.00
 6 32 12 1.68 0.00
 6 32 13 4.97 0.00
 6 34 0 -13.11 0.00
 6 34 1 1.65 0.00
 6 34 2 0.87 0.00
 6 34 3 -3.58 0.00
 6 34 4 3.70 0.00
 6 34 5 0.20 0.00
 6 34 6 7.38 0.00
 6 34 7 -6.43 0.00
 6 34 8 -10.36 0.00
 6 34 9 4.88 0.00
 6 34 10 0.80 0.00
 6 34 11 -10.13 0.00
 6 34 12 1.07 0.00
 6 34 13 -10.45 0.00
 6 36 0 6.42 0.00
 6 36 1 -2.69 0.00
 6 36 2 -3.73 0.00
 6 36 3 -0.94 0.00
 6 36 4 5.59 0.00
 6 36 5 -5.77 0.00
 6 36 6 0.40 0.00
 6 36 7 2.96 0.00
 6 36 8 4.74 0.00
 6 36 9 -3.93 0.00
 6 36 10 -2.87 0.00
 6 36 11 7.85 0.00
 6 36 12 -4.69 0.00
 6 38 0 -19.31 0.00
 6 38 1 1.70 0.00
 6 38 2 -1.32 0.00
 6 38 3 5.30 0.00
 6 38 4 6.64 0.00
 6 38 5 4.27 0.00
 6 38 6 -10.94 0.00
 6 38 7 -2.91 0.00
 6 38 8 3.82 0.00
 6 38 9 -4.11 0.00
 6 38 10 -27.87 0.00
 6 38 11 -4.73 0.00
 6 40 0 -4.20 0.00
 6 40 1 1.58 0.00
 6 40 2 1.76 0.00
 6 40 3 3.14 0.00
 6 40 4 -3.18 0.00
 6 40 5 -1.60 0.00
 6 40 6 -4.90 0.00
 6 40 7 -1.64 0.00
 6 40 8 -0.56 0.00
 6 40 9 4.69 0.00
 6 40 10 -10.78 0.00
 6 42 0 6.57 0.00
 6 42 1 -0.18 0.00
 6 42 2 8.05 0.00
 6 42 3 0.48 0.00
 6 42 4 -0.25 0.00
 6 42 5 -0.66 0.00
 6 42 6 -1.66 0.00
 6 42 7 -2.51 0.00
 6 42 8 2.02 0.00
 6 42 9 -0.29 0.00
 6 44 0 4.51 0.00
 6 44 1 1.09 0.00
 6 44 2 -1.27 0.00
 6 44 3 3.02 0.00
 6 44 4 2.10 0.00
 6 44 5 -1.68 0.00
 6 44 6 -6.14 0.00
 6 44 7 6.33 0.00
 6 46 0 9.83 0.00
 6 46 1 -1.37 0.00
 6 46 2 3.51 0.00
 6 46 3 8.51 0.00
 6 46 4 -0.12 0.00
 6 46 5 -8.01 0.00
 7 1 0 0.15 0.00
 7 1 1 -158.32 0.00
 7 1 2 15.55 0.00
 7 1 3 61.84 0.00
 7 1 4 4.14 0.00
 7 1 5 -56.11 0.00
 7 1 6 -3.62 0.00
 7 1 7 -17.67 0.00
 7 1 8 -6.68 0.00
 7 1 9 -6.93 0.00
 7 1 10 4.22 0.00
 7 1 11 3.20 0.00
 7 1 12 -5.33 0.00
 7 1 13 1.88 0.00
 7 1 14 -13.05 0.00
 7 1 15 -2.94 0.00
 7 1 16 9.90 0.00
 7 1 17 -9.05 0.00
 7 1 18 -17.26 0.00
 7 1 19 -3.87 0.00
 7 3 0 23.04 0.00
 7 3 1 -42.94 0.00
 7 3 2 -6.67 0.00
 7 3 3 5.78 0.00
 7 3 4 -4.34 0.00
 7 3 5 -4.99 0.00
 7 3 6 -9.80 0.00
 7 3 7 38.27 0.00
 7 3 8 1.58 0.00
 7 3 9 8.96 0.00
 7 3 10 0.52 0.00
 7 3 11 -2.20 0.00
 7 3 12 7.78 0.00
 7 3 13 -6.38 0.00
 7 3 14 -12.83 0.00
 7 3 15 3.32 0.00
 7 3 16 5.88 0.00
 7 3 17 1.87 0.00
 7 3 18 -5.26 0.00
 7 3 19 6.15 0.00
 7 5 0 -18.90 0.00
 7 5 1 23.70 0.00
 7 5 2 19.68 0.00
 7 5 3 9.33 0.00
 7 5 4 -0.70 0.00
 7 5 5 24.74 0.00
 7 5 6 0.23 0.00
 7 5 7 -10.90 0.00
 7 5 8 11.42 0.00
 7 5 9 -6.24 0.00
 7 5 10 -0.22 0.00
 7 5 11 6.83 0.00
 7 5 12 -2.86 0.00
 7 5 13 10.34 0.00
 7 5 14 -1.55 0.00
 7 5 15 0.83 0.00
 7 5 16 -1.22 0.00
 7 5 17 3.03 0.00
 7 5 18 0.27 0.00
 7 5 19 -1.95 0.00
 7 7 0 37.23 0.00
 7 7 1 -93.62 0.00
 7 7 2 4.12 0.00
 7 7 3 6.44 0.00
 7 7 4 4.56 0.00
 7 7 5 4.24 0.00
 7 7 6 1.83 0.00
 7 7 7 4.34 0.00
 7 7 8 -9.28 0.00
 7 7 9 9.76 0.00
 7 7 10 0.81 0.00
 7 7 11 -9.44 0.00
 7 7 12 -1.87 0.00
 7 7 13 -5.84 0.00
 7 7 14 -3.41 0.00
 7 7 15 1.96 0.00
 7 7 16 1.12 0.00
 7 7 17 3.59 0.00
 7 7 18 -0.21 0.00
 7 7 19 7.20 0.00
 7 9 0 13.06 0.00
 7 9 1 -23.57 0.00
 7 9 2 -17.73 0.00
 7 9 3 9.95 0.00
 7 9 4 -2.03 0.00
 7 9 5 11.12 0.00
 7 9 6 -12.23 0.00
 7 9 7 17.16 0.00
 7 9 8 6.25 0.00
 7 9 9 16.98 0.00
 7 9 10 -1.18 0.00
 7 9 11 8.60 0.00
 7 9 12 0.31 0.00
 7 9 13 3.20 0.00
 7 9 14 -3.16 0.00
 7 9 15 4.35 0.00
 7 9 16 -1.15 0.00
 7 9 17 -3.11 0.00
 7 9 18 6.30 0.00
 7 11 0 -23.48 0.00
 7 11 1 -11.79 0.00
 7 11 2 32.85 0.00
 7 11 3 13.51 0.00
 7 11 4 7.93 0.00
 7 11 5 5.89 0.00
 7 11 6 14.04 0.00
 7 11 7 0.31 0.00
 7 11 8 6.38 0.00
 7 11 9 -5.36 0.00
 7 11 10 -4.28 0.00
 7 11 11 -8.40 0.00
 7 11 12 0.70 0.00
 7 11 13 1.66 0.00
 7 11 14 -5.37 0.00
 7 11 15 2.31 0.00
 7 11 16 6.51 0.00
 7 11 17 -3.06 0.00
 7 11 18 -4.02 0.00
 7 13 0 16.70 0.00
 7 13 1 4.46 0.00
 7 13 2 -14.70 0.00
 7 13 3 -16.24 0.00
 7 13 4 -1.45 0.00
 7 13 5 0.58 0.00
 7 13 6 4.19 0.00
 7 13 7 -5.91 0.00
 7 13 8 -7.41 0.00
 7 13 9 4.58 0.00
 7 13 10 5.72 0.00
 7 13 11 4.22 0.00
 7 13 12 -3.81 0.00
 7 13 13 0.50 0.00
 7 13 14 1.31 0.00
 7 13 15 -5.14 0.00
 7 13 16 -3.23 0.00
 7 13 17 9.06 0.00
 7 13 18 -3.43 0.00
 7 15 0 -4.89 0.00
 7 15 1 -2.96 0.00
 7 15 2 10.16 0.00
 7 15 3 17.66 0.00
 7 15 4 0.21 0.00
 7 15 5 6.08 0.00
 7 15 6 -4.34 0.00
 7 15 7 26.43 0.00
 7 15 8 12.09 0.00
 7 15 9 -2.09 0.00
 7 15 10 3.47 0.00
 7 15 11 -3.39 0.00
 7 15 12 -0.33 0.00
 7 15 13 1.58 0.00
 7 15 14 0.73 0.00
 7 15 15 2.66 0.00
 7 15 16 -3.63 0.00
 7 15 17 1.18 0.00
 7 15 18 11.06 0.00
 7 17 0 20.24 0.00
 7 17 1 -15.95 0.00
 7 17 2 6.10 0.00
 7 17 3 0.91 0.00
 7 17 4 1.85 0.00
 7 17 5 -21.22 0.00
 7 17 6 8.79 0.00
 7 17 7 -3.81 0.00
 7 17 8 1.63 0.00
 7 17 9 -7.50 0.00
 7 17 10 0.19 0.00
 7 17 11 2.08 0.00
 7 17 12 1.02 0.00
 7 17 13 -7.22 0.00
 7 17 14 -0.05 0.00
 7 17 15 -1.74 0.00
 7 17 16 5.01 0.00
 7 17 17 -4.19 0.00
 7 17 18 -5.66 0.00
 7 19 0 5.28 0.00
 7 19 1 9.52 0.00
 7 19 2 -17.22 0.00
 7 19 3 0.65 0.00
 7 19 4 4.30 0.00
 7 19 5 12.65 0.00
 7 19 6 -5.35 0.00
 7 19 7 3.65 0.00
 7 19 8 3.54 0.00
 7 19 9 2.49 0.00
 7 19 10 -1.43 0.00
 7 19 11 1.30 0.00
 7 19 12 1.59 0.00
 7 19 13 3.56 0.00
 7 19 14 1.88 0.00
 7 19 15 1.30 0.00
 7 19 16 5.68 0.00
 7 19 17 -0.42 0.00
 7 21 0 -8.79 0.00
 7 21 1 8.04 0.00
 7 21 2 14.36 0.00
 7 21 3 -5.03 0.00
 7 21 4 -4.22 0.00
 7 21 5 -6.19 0.00
 7 21 6 9.41 0.00
 7 21 7 5.10 0.00
 7 21 8 -2.63 0.00
 7 21 9 -2.12 0.00
 7 21 10 0.15 0.00
 7 21 11 -4.86 0.00
 7 21 12 1.00 0.00
 7 21 13 -0.47 0.00
 7 21 14 -3.91 0.00
 7 21 15 -1.93 0.00
 7 21 16 -5.54 0.00
 7 21 17 5.46 0.00
 7 23 0 16.26 0.00
 7 23 1 -0.47 0.00
 7 23 2 3.45 0.00
 7 23 3 4.40 0.00
 7 23 4 -6.18 0.00
 7 23 5 -19.88 0.00
 7 23 6 1.57 0.00
 7 23 7 2.21 0.00
 7 23 8 -5.60 0.00
 7 23 9 -3.28 0.00
 7 23 10 0.65 0.00
 7 23 11 2.24 0.00
 7 23 12 3.31 0.00
 7 23 13 -3.14 0.00
 7 23 14 -2.37 0.00
 7 23 15 1.40 0.00
 7 23 16 6.72 0.00
 7 25 0 -6.44 0.00
 7 25 1 1.52 0.00
 7 25 2 -14.47 0.00
 7 25 3 11.65 0.00
 7 25 4 2.95 0.00
 7 25 5 5.35 0.00
 7 25 6 -7.34 0.00
 7 25 7 6.15 0.00
 7 25 8 6.50 0.00
 7 25 9 2.82 0.00
 7 25 10 -6.69 0.00
 7 25 11 3.63 0.00
 7 25 12 2.78 0.00
 7 25 13 -4.17 0.00
 7 25 14 -2.66 0.00
 7 25 15 3.24 0.00
 7 25 16 1.97 0.00
 7 27 0 -2.22 0.00
 7 27 1 0.10 0.00
 7 27 2 12.54 0.00
 7 27 3 3.92 0.00
 7 27 4 -1.77 0.00
 7 27 5 -2.37 0.00
 7 27 6 -1.94 0.00
 7 27 7 -13.16 0.00
 7 27 8 0.39 0.00
 7 27 9 3.58 0.00
 7 27 10 -0.07 0.00
 7 27 11 -5.61 0.00
 7 27 12 -2.11 0.00
 7 27 13 5.60 0.00
 7 27 14 -3.36 0.00
 7 27 15 -9.20 0.00
 7 29 0 -4.21 0.00
 7 29 1 4.62 0.00
 7 29 2 -2.30 0.00
 7 29 3 -7.36 0.00
 7 29 4 -8.27 0.00
 7 29 5 -3.88 0.00
 7 29 6 -3.11 0.00
 7 29 7 5.07 0.00
 7 29 8 -7.49 0.00
 7 29 9 -1.26 0.00
 7 29 10 11.31 0.00
 7 29 11 -1.09 0.00
 7 29 12 3.53 0.00
 7 29 13 1.24 0.00
 7 29 14 -1.31 0.00
 7 31 0 -10.63 0.00
 7 31 1 1.12 0.00
 7 31 2 0.70 0.00
 7 31 3 15.69 0.00
 7 31 4 4.24 0.00
 7 31 5 6.28 0.00
 7 31 6 3.55 0.00
 7 31 7 -10.49 0.00
 7 31 8 -3.15 0.00
 7 31 9 8.73 0.00
 7 31 10 -7.14 0.00
 7 31 11 -3.81 0.00
 7 31 12 -5.29 0.00
 7 31 13 -1.49 0.00
 7 31 14 -17.54 0.00
 7 33 0 22.26 0.00
 7 33 1 -3.73 0.00
 7 33 2 -5.95 0.00
 7 33 3 -8.71 0.00
 7 33 4 -1.28 0.00
 7 33 5 2.27 0.00
 7 33 6 -1.08 0.00
 7 33 7 0.84 0.00
 7 33 8 8.64 0.00
 7 33 9 11.67 0.00
 7 33 10 11.41 0.00
 7 33 11 -9.82 0.00
 7 33 12 -2.67 0.00
 7 33 13 9.62 0.00
 7 35 0 -0.54 0.00
 7 35 1 -2.23 0.00
 7 35 2 -5.77 0.00
 7 35 3 -2.78 0.00
 7 35 4 -9.44 0.00
 7 35 5 -5.78 0.00
 7 35 6 0.64 0.00
 7 35 7 5.21 0.00
 7 35 8 -7.83 0.00
 7 35 9 2.24 0.00
 7 35 10 -5.15 0.00
 7 35 11 3.59 0.00
 7 35 12 -0.86 0.00
 7 37 0 -2.12 0.00
 7 37 1 -10.93 0.00
 7 37 2 9.02 0.00
 7 37 3 9.58 0.00
 7 37 4 4.11 0.00
 7 37 5 20.23 0.00
 7 37 6 4.77 0.00
 7 37 7 16.98 0.00
 7 37 8 7.03 0.00
 7 37 9 -6.53 0.00
 7 37 10 -1.66 0.00
 7 37 11 5.88 0.00
 7 37 12 -1.80 0.00
 7 39 0 8.33 0.00
 7 39 1 -11.70 0.00
 7 39 2 -2.83 0.00
 7 39 3 2.70 0.00
 7 39 4 -1.84 0.00
 7 39 5 -19.96 0.00
 7 39 6 -6.36 0.00
 7 39 7 0.19 0.00
 7 39 8 -8.07 0.00
 7 39 9 -14.30 0.00
 7 39 10 -6.12 0.00
 7 41 0 -1.47 0.00
 7 41 1 4.77 0.00
 7 41 2 4.87 0.00
 7 41 3 -5.53 0.00
 7 41 4 0.57 0.00
 7 41 5 15.08 0.00
 7 41 6 -3.20 0.00
 7 41 7 4.55 0.00
 7 41 8 4.79 0.00
 7 41 9 13.03 0.00
 7 43 0 2.01 0.00
 7 43 1 4.49 0.00
 7 43 2 -2.00 0.00
 7 43 3 -13.57 0.00
 7 43 4 1.56 0.00
 7 43 5 1.36 0.00
 7 43 6 -0.96 0.00
 7 43 7 -8.65 0.00
 7 43 8 -6.85 0.00
 7 45 0 12.20 0.00
 7 45 1 -1.36 0.00
 7 45 2 -5.26 0.00
 7 45 3 -0.11 0.00
 7 45 4 -1.45 0.00
 7 45 5 -2.76 0.00
 7 47 0 -2.51 0.00
 7 47 1 -9.42 0.00
 7 47 2 1.85 0.00
 8 0 0 135.05 0.00
 8 0 2 157.13 0.00
 8 0 4 -22.28 0.00
 8 0 6 37.38 0.00
 8 0 8 -2.53 0.00
 8 0 10 -9.25 0.00
 8 0 12 -1.05 0.00
 8 0 14 3.08 0.00
 8 0 16 -1.48 0.00
 8 0 18 0.53 0.00
 8 2 0 -39.09 0.00
 8 2 1 22.83 0.00
 8 2 2 -24.09 0.00
 8 2 3 -5.07 0.00
 8 2 4 -18.07 0.00
 8 2 5 -11.90 0.00
 8 2 6 -17.59 0.00
 8 2 7 -15.78 0.00
 8 2 8 21.46 0.00
 8 2 9 -2.41 0.00
 8 2 10 1.05 0.00
 8 2 11 -4.64 0.00
 8 2 12 1.41 0.00
 8 2 13 4.46 0.00
 8 2 14 1.84 0.00
 8 2 15 -9.49 0.00
 8 2 16 -1.12 0.00
 8 2 17 -1.64 0.00
 8 2 18 3.29 0.00
 8 4 0 24.30 0.00
 8 4 1 -2.76 0.00
 8 4 2 3.23 0.00
 8 4 3 5.30 0.00
 8 4 4 10.04 0.00
 8 4 5 -0.41 0.00
 8 4 6 7.20 0.00
 8 4 7 9.36 0.00
 8 4 8 12.44 0.00
 8 4 9 2.04 0.00
 8 4 10 -22.00 0.00
 8 4 11 2.84 0.00
 8 4 12 3.50 0.00
 8 4 13 4.80 0.00
 8 4 14 -4.26 0.00
 8 4 15 -8.23 0.00
 8 4 16 -1.69 0.00
 8 4 17 -2.80 0.00
 8 4 18 -0.73 0.00
 8 6 0 25.08 0.00
 8 6 1 30.37 0.00
 8 6 2 23.92 0.00
 8 6 3 -12.44 0.00
 8 6 4 -22.60 0.00
 8 6 5 12.47 0.00
 8 6 6 -0.54 0.00
 8 6 7 -5.06 0.00
 8 6 8 -14.89 0.00
 8 6 9 -12.49 0.00
 8 6 10 12.81 0.00
 8 6 11 2.42 0.00
 8 6 12 -13.14 0.00
 8 6 13 -4.75 0.00
 8 6 14 -0.66 0.00
 8 6 15 -4.35 0.00
 8 6 16 -0.48 0.00
 8 6 17 0.65 0.00
 8 6 18 3.06 0.00
 8 8 0 -62.42 0.00
 8 8 1 6.95 0.00
 8 8 2 -33.58 0.00
 8 8 3 6.10 0.00
 8 8 4 -6.63 0.00
 8 8 5 2.78 0.00
 8 8 6 -10.98 0.00
 8 8 7 -19.76 0.00
 8 8 8 -2.03 0.00
 8 8 9 2.68 0.00
 8 8 10 8.21 0.00
 8 8 11 2.61 0.00
 8 8 12 5.34 0.00
 8 8 13 -2.20 0.00
 8 8 14 -1.94 0.00
 8 8 15 -6.28 0.00
 8 8 16 7.09 0.00
 8 8 17 0.05 0.00
 8 8 18 -8.56 0.00
 8 10 0 -60.00 0.00
 8 10 1 -2.40 0.00
 8 10 2 55.76 0.00
 8 10 3 -12.01 0.00
 8 10 4 -6.48 0.00
 8 10 5 10.15 0.00
 8 10 6 19.59 0.00
 8 10 7 10.38 0.00
 8 10 8 5.28 0.00
 8 10 9 7.48 0.00
 8 10 10 -5.66 0.00
 8 10 11 0.98 0.00
 8 10 12 -0.08 0.00
 8 10 13 4.93 0.00
 8 10 14 -8.30 0.00
 8 10 15 -0.81 0.00
 8 10 16 16.20 0.00
 8 10 17 3.76 0.00
 8 10 18 -0.47 0.00
 8 12 0 17.96 0.00
 8 12 1 13.31 0.00
 8 12 2 -22.82 0.00
 8 12 3 10.58 0.00
 8 12 4 5.95 0.00
 8 12 5 -4.77 0.00
 8 12 6 2.47 0.00
 8 12 7 2.44 0.00
 8 12 8 -20.86 0.00
 8 12 9 -7.55 0.00
 8 12 10 4.44 0.00
 8 12 11 -8.81 0.00
 8 12 12 -0.45 0.00
 8 12 13 0.47 0.00
 8 12 14 -0.14 0.00
 8 12 15 -1.14 0.00
 8 12 16 -8.03 0.00
 8 12 17 -6.75 0.00
 8 12 18 -1.25 0.00
 8 14 0 -13.41 0.00
 8 14 1 -19.64 0.00
 8 14 2 -26.62 0.00
 8 14 3 15.17 0.00
 8 14 4 -15.77 0.00
 8 14 5 -0.06 0.00
 8 14 6 -6.37 0.00
 8 14 7 -10.97 0.00
 8 14 8 4.12 0.00
 8 14 9 7.78 0.00
 8 14 10 5.76 0.00
 8 14 11 3.89 0.00
 8 14 12 -4.14 0.00
 8 14 13 5.11 0.00
 8 14 14 -4.78 0.00
 8 14 15 -4.08 0.00
 8 14 16 7.21 0.00
 8 14 17 -2.39 0.00
 8 14 18 0.64 0.00
 8 16 0 3.60 0.00
 8 16 1 19.88 0.00
 8 16 2 7.50 0.00
 8 16 3 -11.35 0.00
 8 16 4 8.59 0.00
 8 16 5 13.92 0.00
 8 16 6 13.76 0.00
 8 16 7 2.48 0.00
 8 16 8 -6.95 0.00
 8 16 9 13.07 0.00
 8 16 10 -8.49 0.00
 8 16 11 -9.92 0.00
 8 16 12 -0.35 0.00
 8 16 13 1.63 0.00
 8 16 14 -0.42 0.00
 8 16 15 3.85 0.00
 8 16 16 -0.28 0.00
 8 16 17 5.27 0.00
 8 18 0 10.98 0.00
 8 18 1 -7.41 0.00
 8 18 2 -35.38 0.00
 8 18 3 8.77 0.00
 8 18 4 -4.24 0.00
 8 18 5 -4.09 0.00
 8 18 6 -14.92 0.00
 8 18 7 4.74 0.00
 8 18 8 -1.84 0.00
 8 18 9 -6.20 0.00
 8 18 10 3.49 0.00
 8 18 11 0.23 0.00
 8 18 12 2.36 0.00
 8 18 13 -2.91 0.00
 8 18 14 -0.01 0.00
 8 18 15 -3.15 0.00
 8 18 16 3.37 0.00
 8 18 17 1.03 0.00
 8 20 0 -1.99 0.00
 8 20 1 -0.58 0.00
 8 20 2 -11.76 0.00
 8 20 3 -5.84 0.00
 8 20 4 -9.44 0.00
 8 20 5 3.89 0.00
 8 20 6 -3.28 0.00
 8 20 7 -1.61 0.00
 8 20 8 4.74 0.00
 8 20 9 6.29 0.00
 8 20 10 -4.47 0.00
 8 20 11 5.46 0.00
 8 20 12 -8.33 0.00
 8 20 13 3.62 0.00
 8 20 14 -4.84 0.00
 8 20 15 6.85 0.00
 8 20 16 -7.57 0.00
 8 20 17 -10.17 0.00
 8 22 0 1.46 0.00
 8 22 1 7.67 0.00
 8 22 2 9.87 0.00
 8 22 3 -1.16 0.00
 8 22 4 6.72 0.00
 8 22 5 8.65 0.00
 8 22 6 3.87 0.00
 8 22 7 -3.53 0.00
 8 22 8 -6.45 0.00
 8 22 9 3.47 0.00
 8 22 10 -2.28 0.00
 8 22 11 -5.24 0.00
 8 22 12 2.27 0.00
 8 22 13 5.40 0.00
 8 22 14 7.56 0.00
 8 22 15 1.10 0.00
 8 22 16 0.82 0.00
 8 24 0 -13.75 0.00
 8 24 1 -16.32 0.00
 8 24 2 -14.07 0.00
 8 24 3 1.30 0.00
 8 24 4 -10.47 0.00
 8 24 5 -8.59 0.00
 8 24 6 -7.94 0.00
 8 24 7 1.21 0.00
 8 24 8 3.05 0.00
 8 24 9 3.14 0.00
 8 24 10 1.49 0.00
 8 24 11 -4.28 0.00
 8 24 12 1.25 0.00
 8 24 13 1.40 0.00
 8 24 14 -6.59 0.00
 8 24 15 -10.89 0.00
 8 24 16 -0.43 0.00
 8 26 0 17.24 0.00
 8 26 1 -0.43 0.00
 8 26 2 -2.10 0.00
 8 26 3 3.82 0.00
 8 26 4 17.52 0.00
 8 26 5 -1.05 0.00
 8 26 6 -8.67 0.00
 8 26 7 -1.44 0.00
 8 26 8 3.42 0.00
 8 26 9 0.17 0.00
 8 26 10 -3.53 0.00
 8 26 11 9.77 0.00
 8 26 12 -5.01 0.00
 8 26 13 2.21 0.00
 8 26 14 8.07 0.00
 8 26 15 9.66 0.00
 8 28 0 1.59 0.00
 8 28 1 4.85 0.00
 8 28 2 -0.04 0.00
 8 28 3 -2.50 0.00
 8 28 4 -4.06 0.00
 8 28 5 4.92 0.00
 8 28 6 -5.35 0.00
 8 28 7 -10.59 0.00
 8 28 8 3.50 0.00
 8 28 9 -4.27 0.00
 8 28 10 0.52 0.00
 8 28 11 -10.13 0.00
 8 28 12 -4.28 0.00
 8 28 13 -6.52 0.00
 8 28 14 2.01 0.00
 8 28 15 -9.62 0.00
 8 30 0 2.69 0.00
 8 30 1 -1.55 0.00
 8 30 2 -2.68 0.00
 8 30 3 -5.69 0.00
 8 30 4 -0.82 0.00
 8 30 5 5.20 0.00
 8 30 6 3.97 0.00
 8 30 7 5.66 0.00
 8 30 8 -8.20 0.00
 8 30 9 10.01 0.00
 8 30 10 -9.61 0.00
 8 30 11 -0.12 0.00
 8 30 12 14.72 0.00
 8 30 13 5.48 0.00
 8 30 14 1.74 0.00
 8 32 0 9.62 0.00
 8 32 1 -3.45 0.00
 8 32 2 12.05 0.00
 8 32 3 5.31 0.00
 8 32 4 -6.26 0.00
 8 32 5 -5.78 0.00
 8 32 6 -2.73 0.00
 8 32 7 -12.40 0.00
 8 32 8 -5.42 0.00
 8 32 9 -10.75 0.00
 8 32 10 2.42 0.00
 8 32 11 5.70 0.00
 8 32 12 -2.20 0.00
 8 32 13 1.20 0.00
 8 34 0 -2.02 0.00
 8 34 1 -9.78 0.00
 8 34 2 4.38 0.00
 8 34 3 2.62 0.00
 8 34 4 6.71 0.00
 8 34 5 1.30 0.00
 8 34 6 2.53 0.00
 8 34 7 2.89 0.00
 8 34 8 -6.96 0.00
 8 34 9 -3.05 0.00
 8 34 10 -0.05 0.00
 8 34 11 -8.10 0.00
 8 34 12 1.07 0.00
 8 36 0 -23.81 0.00
 8 36 1 -1.98 0.00
 8 36 2 3.14 0.00
 8 36 3 -2.93 0.00
 8 36 4 -4.60 0.00
 8 36 5 -1.70 0.00
 8 36 6 -9.30 0.00
 8 36 7 5.10 0.00
 8 36 8 3.96 0.00
 8 36 9 -3.00 0.00
 8 36 10 -6.49 0.00
 8 36 11 2.07 0.00
 8 36 12 -10.39 0.00
 8 38 0 14.71 0.00
 8 38 1 -0.82 0.00
 8 38 2 -6.49 0.00
 8 38 3 10.49 0.00
 8 38 4 18.54 0.00
 8 38 5 -8.00 0.00
 8 38 6 2.68 0.00
 8 38 7 0.53 0.00
 8 38 8 -7.85 0.00
 8 38 9 -4.00 0.00
 8 38 10 -13.58 0.00
 8 38 11 -7.10 0.00
 8 40 0 -10.95 0.00
 8 40 1 5.32 0.00
 8 40 2 -6.42 0.00
 8 40 3 -2.58 0.00
 8 40 4 -4.21 0.00
 8 40 5 5.27 0.00
 8 40 6 -12.48 0.00
 8 40 7 -2.42 0.00
 8 40 8 6.99 0.00
 8 40 9 1.51 0.00
 8 40 10 -23.31 0.00
 8 42 0 8.30 0.00
 8 42 1 -3.21 0.00
 8 42 2 -1.50 0.00
 8 42 3 -2.41 0.00
 8 42 4 0.82 0.00
 8 42 5 -0.76 0.00
 8 42 6 -3.98 0.00
 8 42 7 1.10 0.00
 8 42 8 -2.70 0.00
 8 44 0 3.04 0.00
 8 44 1 -4.02 0.00
 8 44 2 2.05 0.00
 8 44 3 5.91 0.00
 8 44 4 3.19 0.00
 8 44 5 1.69 0.00
 8 44 6 -0.57 0.00
 8 46 0 -10.99 0.00
 8 46 1 -0.27 0.00
 8 46 2 3.78 0.00
 8 46 3 -0.21 0.00
 9 1 0 9.55 0.00
 9 1 1 29.24 0.00
 9 1 2 6.17 0.00
 9 1 3 -21.96 0.00
 9 1 4 13.24 0.00
 9 1 5 -36.31 0.00
 9 1 6 -4.03 0.00
 9 1 7 0.95 0.00
 9 1 8 -17.09 0.00
 9 1 9 -27.79 0.00
 9 1 10 0.32 0.00
 9 1 11 3.02 0.00
 9 1 12 -3.10 0.00
 9 1 13 -4.73 0.00
 9 1 14 -14.73 0.00
 9 1 15 -3.31 0.00
 9 1 16 5.13 0.00
 9 1 17 1.65 0.00
 9 1 18 -12.29 0.00
 9 3 0 -7.02 0.00
 9 3 1 -30.27 0.00
 9 3 2 12.22 0.00
 9 3 3 9.01 0.00
 9 3 4 -19.13 0.00
 9 3 5 13.14 0.00
 9 3 6 -4.29 0.00
 9 3 7 20.79 0.00
 9 3 8 0.79 0.00
 9 3 9 10.24 0.00
 9 3 10 8.33 0.00
 9 3 11 7.93 0.00
 9 3 12 -8.08 0.00
 9 3 13 3.29 0.00
 9 3 14 2.71 0.00
 9 3 15 -1.37 0.00
 9 3 16 1.46 0.00
 9 3 17 -8.05 0.00
 9 3 18 -3.84 0.00
 9 5 0 37.16 0.00
 9 5 1 12.41 0.00
 9 5 2 -8.58 0.00
 9 5 3 5.06 0.00
 9 5 4 9.43 0.00
 9 5 5 28.22 0.00
 9 5 6 4.63 0.00
 9 5 7 -17.00 0.00
 9 5 8 -1.43 0.00
 9 5 9 7.04 0.00
 9 5 10 -4.37 0.00
 9 5 11 -4.97 0.00
 9 5 12 5.47 0.00
 9 5 13 7.63 0.00
 9 5 14 -10.19 0.00
 9 5 15 6.40 0.00
 9 5 16 -0.91 0.00
 9 5 17 1.24 0.00
 9 5 18 5.35 0.00
 9 7 0 -0.23 0.00
 9 7 1 -10.87 0.00
 9 7 2 9.69 0.00
 9 7 3 -13.51 0.00
 9 7 4 2.94 0.00
 9 7 5 1.22 0.00
 9 7 6 -6.68 0.00
 9 7 7 0.94 0.00
 9 7 8 3.09 0.00
 9 7 9 1.05 0.00
 9 7 10 -8.79 0.00
 9 7 11 -5.79 0.00
 9 7 12 -0.51 0.00
 9 7 13 -1.02 0.00
 9 7 14 -4.91 0.00
 9 7 15 -3.28 0.00
 9 7 16 -1.07 0.00
 9 7 17 -1.68 0.00
 9 7 18 3.62 0.00
 9 9 0 22.10 0.00
 9 9 1 -20.59 0.00
 9 9 2 -2.77 0.00
 9 9 3 -4.70 0.00
 9 9 4 -7.06 0.00
 9 9 5 10.66 0.00
 9 9 6 -10.28 0.00
 9 9 7 14.74 0.00
 9 9 8 -6.54 0.00
 9 9 9 9.92 0.00
 9 9 10 3.07 0.00
 9 9 11 7.83 0.00
 9 9 12 -0.89 0.00
 9 9 13 -0.47 0.00
 9 9 14 -0.98 0.00
 9 9 15 12.36 0.00
 9 9 16 0.29 0.00
 9 9 17 -1.07 0.00
 9 9 18 3.38 0.00
 9 11 0 4.84 0.00
 9 11 1 11.52 0.00
 9 11 2 -1.06 0.00
 9 11 3 15.08 0.00
 9 11 4 9.86 0.00
 9 11 5 -4.10 0.00
 9 11 6 12.35 0.00
 9 11 7 20.22 0.00
 9 11 8 10.66 0.00
 9 11 9 -13.41 0.00
 9 11 10 6.17 0.00
 9 11 11 -7.74 0.00
 9 11 12 -6.31 0.00
 9 11 13 -0.19 0.00
 9 11 14 -3.80 0.00
 9 11 15 -5.92 0.00
 9 11 16 -2.03 0.00
 9 11 17 -3.03 0.00
 9 11 18 2.61 0.00
 9 13 0 -7.97 0.00
 9 13 1 -40.30 0.00
 9 13 2 19.37 0.00
 9 13 3 -3.96 0.00
 9 13 4 -3.00 0.00
 9 13 5 -13.42 0.00
 9 13 6 -0.93 0.00
 9 13 7 1.19 0.00
 9 13 8 -4.77 0.00
 9 13 9 2.23 0.00
 9 13 10 -3.99 0.00
 9 13 11 -1.13 0.00
 9 13 12 -2.76 0.00
 9 13 13 -2.08 0.00
 9 13 14 -0.64 0.00
 9 13 15 -1.67 0.00
 9 13 16 -4.52 0.00
 9 13 17 6.48 0.00
 9 13 18 -1.71 0.00
 9 15 0 15.85 0.00
 9 15 1 -0.97 0.00
 9 15 2 -14.43 0.00
 9 15 3 23.15 0.00
 9 15 4 1.31 0.00
 9 15 5 12.05 0.00
 9 15 6 1.55 0.00
 9 15 7 7.61 0.00
 9 15 8 9.04 0.00
 9 15 9 7.76 0.00
 9 15 10 7.54 0.00
 9 15 11 -4.77 0.00
 9 15 12 4.74 0.00
 9 15 13 1.29 0.00
 9 15 14 -1.83 0.00
 9 15 15 3.23 0.00
 9 15 16 5.09 0.00
 9 15 17 2.05 0.00
 9 17 0 0.70 0.00
 9 17 1 -12.57 0.00
 9 17 2 12.88 0.00
 9 17 3 0.20 0.00
 9 17 4 10.42 0.00
 9 17 5 -19.01 0.00
 9 17 6 -1.08 0.00
 9 17 7 5.89 0.00
 9 17 8 10.00 0.00
 9 17 9 -14.00 0.00
 9 17 10 -8.20 0.00
 9 17 11 2.82 0.00
 9 17 12 -0.75 0.00
 9 17 13 -6.38 0.00
 9 17 14 -0.84 0.00
 9 17 15 -7.56 0.00
 9 17 16 -8.13 0.00
 9 17 17 0.32 0.00
 9 19 0 -2.63 0.00
 9 19 1 -0.73 0.00
 9 19 2 0.81 0.00
 9 19 3 3.90 0.00
 9 19 4 -6.04 0.00
 9 19 5 -5.48 0.00
 9 19 6 -1.05 0.00
 9 19 7 7.13 0.00
 9 19 8 -6.76 0.00
 9 19 9 5.16 0.00
 9 19 10 8.54 0.00
 9 19 11 4.83 0.00
 9 19 12 3.41 0.00
 9 19 13 4.57 0.00
 9 19 14 6.18 0.00
 9 19 15 2.22 0.00
 9 19 16 7.32 0.00
 9 19 17 -0.85 0.00
 9 21 0 6.20 0.00
 9 21 1 1.80 0.00
 9 21 2 -9.62 0.00
 9 21 3 3.55 0.00
 9 21 4 0.01 0.00
 9 21 5 0.75 0.00
 9 21 6 6.92 0.00
 9 21 7 -1.54 0.00
 9 21 8 5.88 0.00
 9 21 9 -2.05 0.00
 9 21 10 -4.74 0.00
 9 21 11 -6.91 0.00
 9 21 12 -4.54 0.00
 9 21 13 -1.37 0.00
 9 21 14 -6.86 0.00
 9 21 15 4.54 0.00
 9 21 16 -6.58 0.00
 9 23 0 6.03 0.00
 9 23 1 1.15 0.00
 9 23 2 18.75 0.00
 9 23 3 -2.24 0.00
 9 23 4 4.59 0.00
 9 23 5 -15.90 0.00
 9 23 6 -4.72 0.00
 9 23 7 2.17 0.00
 9 23 8 -3.19 0.00
 9 23 9 2.06 0.00
 9 23 10 1.95 0.00
 9 23 11 0.78 0.00
 9 23 12 3.04 0.00
 9 23 13 9.34 0.00
 9 23 14 4.97 0.00
 9 23 15 -4.67 0.00
 9 23 16 -9.69 0.00
 9 25 0 -12.04 0.00
 9 25 1 0.93 0.00
 9 25 2 -7.34 0.00
 9 25 3 12.35 0.00
 9 25 4 -12.83 0.00
 9 25 5 3.78 0.00
 9 25 6 -1.49 0.00
 9 25 7 -0.70 0.00
 9 25 8 -6.67 0.00
 9 25 9 0.79 0.00
 9 25 10 2.47 0.00
 9 25 11 0.55 0.00
 9 25 12 -0.13 0.00
 9 25 13 -7.31 0.00
 9 25 14 -0.49 0.00
 9 25 15 1.40 0.00
 9 27 0 12.24 0.00
 9 27 1 7.74 0.00
 9 27 2 -0.61 0.00
 9 27 3 -4.35 0.00
 9 27 4 11.75 0.00
 9 27 5 -0.38 0.00
 9 27 6 -1.32 0.00
 9 27 7 4.61 0.00
 9 27 8 5.76 0.00
 9 27 9 0.89 0.00
 9 27 10 1.34 0.00
 9 27 11 2.19 0.00
 9 27 12 -4.21 0.00
 9 27 13 1.49 0.00
 9 27 14 -10.11 0.00
 9 27 15 4.15 0.00
 9 29 0 -6.39 0.00
 9 29 1 1.83 0.00
 9 29 2 0.83 0.00
 9 29 3 2.01 0.00
 9 29 4 -2.93 0.00
 9 29 5 3.20 0.00
 9 29 6 -12.58 0.00
 9 29 7 -6.48 0.00
 9 29 8 -2.89 0.00
 9 29 9 8.58 0.00
 9 29 10 1.52 0.00
 9 29 11 -18.95 0.00
 9 29 12 5.62 0.00
 9 29 13 16.00 0.00
 9 29 14 8.01 0.00
 9 31 0 6.15 0.00
 9 31 1 7.90 0.00
 9 31 2 -2.66 0.00
 9 31 3 -2.84 0.00
 9 31 4 0.29 0.00
 9 31 5 10.79 0.00
 9 31 6 14.64 0.00
 9 31 7 -2.57 0.00
 9 31 8 -6.36 0.00
 9 31 9 1.22 0.00
 9 31 10 -3.78 0.00
 9 31 11 5.79 0.00
 9 31 12 -8.69 0.00
 9 31 13 -5.24 0.00
 9 33 0 1.50 0.00
 9 33 1 7.78 0.00
 9 33 2 4.93 0.00
 9 33 3 -3.32 0.00
 9 33 4 -4.36 0.00
 9 33 5 -0.96 0.00
 9 33 6 2.28 0.00
 9 33 7 16.14 0.00
 9 33 8 0.48 0.00
 9 33 9 -1.09 0.00
 9 33 10 11.35 0.00
 9 33 11 -2.42 0.00
 9 33 12 2.13 0.00
 9 33 13 13.94 0.00
 9 35 0 -7.20 0.00
 9 35 1 -15.72 0.00
 9 35 2 -0.15 0.00
 9 35 3 18.56 0.00
 9 35 4 -4.87 0.00
 9 35 5 0.94 0.00
 9 35 6 -1.42 0.00
 9 35 7 -3.98 0.00
 9 35 8 -0.77 0.00
 9 35 9 8.61 0.00
 9 35 10 -6.51 0.00
 9 35 11 -10.84 0.00
 9 35 12 -1.38 0.00
 9 37 0 11.54 0.00
 9 37 1 3.43 0.00
 9 37 2 -1.78 0.00
 9 37 3 -0.39 0.00
 9 37 4 2.91 0.00
 9 37 5 0.07 0.00
 9 37 6 3.56 0.00
 9 37 7 23.63 0.00
 9 37 8 -8.20 0.00
 9 37 9 9.40 0.00
 9 37 10 0.52 0.00
 9 37 11 7.09 0.00
 9 39 0 2.09 0.00
 9 39 1 -2.67 0.00
 9 39 2 -0.27 0.00
 9 39 3 2.54 0.00
 9 39 4 4.28 0.00
 9 39 5 9.84 0.00
 9 39 6 -9.34 0.00
 9 39 7 -5.41 0.00
 9 39 8 -1.97 0.00
 9 39 9 -18.35 0.00
 9 39 10 0.12 0.00
 9 41 0 0.14 0.00
 9 41 1 3.00 0.00
 9 41 2 -6.26 0.00
 9 41 3 0.22 0.00
 9 41 4 1.10 0.00
 9 41 5 -6.33 0.00
 9 41 6 -5.42 0.00
 9 41 7 2.64 0.00
 9 41 8 -3.30 0.00
 9 43 0 2.93 0.00
 9 43 1 0.56 0.00
 9 43 2 4.98 0.00
 9 43 3 -5.26 0.00
 9 43 4 -0.03 0.00
 9 43 5 10.83 0.00
 9 43 6 -2.87 0.00
 9 43 7 -1.44 0.00
 9 45 0 -2.11 0.00
 9 45 1 3.82 0.00
 9 45 2 -3.35 0.00
 9 45 3 -7.24 0.00
 9 45 4 -5.24 0.00
 10 0 2 -16.09 0.00
 10 0 4 61.19 0.00
 10 0 6 -24.18 0.00
 10 0 8 16.66 0.00
 10 0 10 -11.47 0.00
 10 0 12 -1.83 0.00
 10 0 14 -8.46 0.00
 10 0 16 -10.69 0.00
 10 0 18 8.17 0.00
 10 2 0 33.60 0.00
 10 2 1 8.90 0.00
 10 2 2 12.51 0.00
 10 2 3 -6.51 0.00
 10 2 4 -31.38 0.00
 10 2 5 -8.29 0.00
 10 2 6 10.48 0.00
 10 2 7 -8.79 0.00
 10 2 8 8.87 0.00
 10 2 9 3.74 0.00
 10 2 10 6.05 0.00
 10 2 11 0.58 0.00
 10 2 12 9.81 0.00
 10 2 13 -3.03 0.00
 10 2 14 6.84 0.00
 10 2 15 -8.15 0.00
 10 2 16 2.50 0.00
 10 2 17 -0.07 0.00
 10 2 18 -2.99 0.00
 10 4 0 -45.07 0.00
 10 4 1 0.29 0.00
 10 4 2 14.86 0.00
 10 4 3 12.89 0.00
 10 4 4 -10.95 0.00
 10 4 5 -1.17 0.00
 10 4 6 6.31 0.00
 10 4 7 7.77 0.00
 10 4 8 -5.39 0.00
 10 4 9 -3.12 0.00
 10 4 10 -3.10 0.00
 10 4 11 -1.46 0.00
 10 4 12 -14.94 0.00
 10 4 13 5.39 0.00
 10 4 14 -8.52 0.00
 10 4 15 0.09 0.00
 10 4 16 0.21 0.00
 10 4 17 -1.90 0.00
 10 4 18 8.08 0.00
 10 6 0 25.91 0.00
 10 6 1 5.91 0.00
 10 6 2 6.43 0.00
 10 6 3 -7.81 0.00
 10 6 4 12.71 0.00
 10 6 5 -4.61 0.00
 10 6 6 -3.91 0.00
 10 6 7 2.91 0.00
 10 6 8 1.52 0.00
 10 6 9 2.23 0.00
 10 6 10 -4.51 0.00
 10 6 11 -2.22 0.00
 10 6 12 9.22 0.00
 10 6 13 -5.71 0.00
 10 6 14 -5.93 0.00
 10 6 15 -1.37 0.00
 10 6 16 1.04 0.00
 10 6 17 3.61 0.00
 10 6 18 2.44 0.00
 10 8 0 -26.65 0.00
 10 8 1 34.72 0.00
 10 8 2 -2.23 0.00
 10 8 3 -2.95 0.00
 10 8 4 -30.20 0.00
 10 8 5 14.18 0.00
 10 8 6 -2.85 0.00
 10 8 7 -6.09 0.00
 10 8 8 -7.72 0.00
 10 8 9 -3.98 0.00
 10 8 10 11.62 0.00
 10 8 11 -4.24 0.00
 10 8 12 -5.09 0.00
 10 8 13 0.29 0.00
 10 8 14 0.67 0.00
 10 8 15 -0.33 0.00
 10 8 16 5.70 0.00
 10 8 17 -7.97 0.00
 10 8 18 -9.96 0.00
 10 10 0 -29.62 0.00
 10 10 1 -15.33 0.00
 10 10 2 16.05 0.00
 10 10 3 -3.95 0.00
 10 10 4 11.66 0.00
 10 10 5 -3.97 0.00
 10 10 6 17.12 0.00
 10 10 7 3.39 0.00
 10 10 8 1.42 0.00
 10 10 9 11.70 0.00
 10 10 10 -2.24 0.00
 10 10 11 5.42 0.00
 10 10 12 -6.08 0.00
 10 10 13 2.26 0.00
 10 10 14 5.86 0.00
 10 10 15 -3.43 0.00
 10 10 16 0.22 0.00
 10 10 17 8.39 0.00
 10 10 18 12.12 0.00
 10 12 0 -19.50 0.00
 10 12 1 8.56 0.00
 10 12 2 17.39 0.00
 10 12 3 7.23 0.00
 10 12 4 -20.85 0.00
 10 12 5 6.04 0.00
 10 12 6 2.14 0.00
 10 12 7 3.30 0.00
 10 12 8 -8.97 0.00
 10 12 9 -4.01 0.00
 10 12 10 4.27 0.00
 10 12 11 -6.64 0.00
 10 12 12 10.04 0.00
 10 12 13 3.97 0.00
 10 12 14 -16.51 0.00
 10 12 15 -1.66 0.00
 10 12 16 12.33 0.00
 10 12 17 -4.64 0.00
 10 14 0 -28.74 0.00
 10 14 1 14.59 0.00
 10 14 2 -24.88 0.00
 10 14 3 -5.53 0.00
 10 14 4 3.00 0.00
 10 14 5 -0.35 0.00
 10 14 6 1.36 0.00
 10 14 7 2.01 0.00
 10 14 8 4.80 0.00
 10 14 9 4.70 0.00
 10 14 10 -2.56 0.00
 10 14 11 -5.75 0.00
 10 14 12 -1.18 0.00
 10 14 13 2.00 0.00
 10 14 14 0.53 0.00
 10 14 15 -5.17 0.00
 10 14 16 5.65 0.00
 10 14 17 -5.32 0.00
 10 16 0 34.34 0.00
 10 16 1 -13.05 0.00
 10 16 2 -9.88 0.00
 10 16 3 10.83 0.00
 10 16 4 11.93 0.00
 10 16 5 1.05 0.00
 10 16 6 -13.87 0.00
 10 16 7 6.17 0.00
 10 16 8 0.63 0.00
 10 16 9 2.07 0.00
 10 16 10 -6.14 0.00
 10 16 11 6.81 0.00
 10 16 12 0.26 0.00
 10 16 13 5.74 0.00
 10 16 14 -6.28 0.00
 10 16 15 0.57 0.00
 10 16 16 -2.01 0.00
 10 16 17 -0.04 0.00
 10 18 0 -27.24 0.00
 10 18 1 13.80 0.00
 10 18 2 -19.38 0.00
 10 18 3 -9.66 0.00
 10 18 4 -14.53 0.00
 10 18 5 11.29 0.00
 10 18 6 3.74 0.00
 10 18 7 -7.64 0.00
 10 18 8 3.45 0.00
 10 18 9 5.24 0.00
 10 18 10 7.18 0.00
 10 18 11 -11.44 0.00
 10 18 12 0.80 0.00
 10 18 13 0.66 0.00
 10 18 14 3.26 0.00
 10 18 15 -1.99 0.00
 10 18 16 5.51 0.00
 10 18 17 4.02 0.00
 10 20 0 3.83 0.00
 10 20 1 0.55 0.00
 10 20 2 -1.83 0.00
 10 20 3 -4.31 0.00
 10 20 4 2.40 0.00
 10 20 5 -4.26 0.00
 10 20 6 -4.07 0.00
 10 20 7 1.75 0.00
 10 20 8 -7.40 0.00
 10 20 9 14.36 0.00
 10 20 10 -11.29 0.00
 10 20 11 6.28 0.00
 10 20 12 -5.19 0.00
 10 20 13 3.63 0.00
 10 20 14 -6.34 0.00
 10 20 15 -1.36 0.00
 10 20 16 0.98 0.00
 10 22 0 6.80 0.00
 10 22 1 0.84 0.00
 10 22 2 -0.92 0.00
 10 22 3 5.44 0.00
 10 22 4 -0.18 0.00
 10 22 5 9.03 0.00
 10 22 6 -7.18 0.00
 10 22 7 -0.42 0.00
 10 22 8 -0.83 0.00
 10 22 9 -6.62 0.00
 10 22 10 3.62 0.00
 10 22 11 -0.46 0.00
 10 22 12 -2.00 0.00
 10 22 13 8.85 0.00
 10 22 14 6.34 0.00
 10 22 15 8.18 0.00
 10 22 16 -6.99 0.00
 10 24 0 -8.91 0.00
 10 24 1 -1.38 0.00
 10 24 2 -16.03 0.00
 10 24 3 -10.94 0.00
 10 24 4 2.61 0.00
 10 24 5 -15.02 0.00
 10 24 6 1.43 0.00
 10 24 7 3.15 0.00
 10 24 8 2.03 0.00
 10 24 9 1.63 0.00
 10 24 10 -7.11 0.00
 10 24 11 -3.15 0.00
 10 24 12 -1.75 0.00
 10 24 13 -0.80 0.00
 10 24 14 6.28 0.00
 10 24 15 -9.19 0.00
 10 26 0 17.16 0.00
 10 26 1 -8.45 0.00
 10 26 2 6.09 0.00
 10 26 3 10.86 0.00
 10 26 4 3.78 0.00
 10 26 5 4.18 0.00
 10 26 6 -6.65 0.00
 10 26 7 -1.77 0.00
 10 26 8 -6.33 0.00
 10 26 9 6.42 0.00
 10 26 10 0.96 0.00
 10 26 11 5.09 0.00
 10 26 12 -6.45 0.00
 10 26 13 8.65 0.00
 10 26 14 4.12 0.00
 10 26 15 2.70 0.00
 10 28 0 0.18 0.00
 10 28 1 -1.41 0.00
 10 28 2 -11.68 0.00
 10 28 3 -1.13 0.00
 10 28 4 5.66 0.00
 10 28 5 -0.21 0.00
 10 28 6 -4.83 0.00
 10 28 7 -3.58 0.00
 10 28 8 -0.52 0.00
 10 28 9 -9.12 0.00
 10 28 10 -3.90 0.00
 10 28 11 -10.94 0.00
 10 28 12 2.24 0.00
 10 28 13 -5.65 0.00
 10 28 14 -2.24 0.00
 10 30 0 -0.50 0.00
 10 30 1 13.63 0.00
 10 30 2 5.76 0.00
 10 30 3 -9.24 0.00
 10 30 4 -1.23 0.00
 10 30 5 3.56 0.00
 10 30 6 -1.31 0.00
 10 30 7 1.71 0.00
 10 30 8 -1.41 0.00
 10 30 9 10.76 0.00
 10 30 10 -9.07 0.00
 10 30 11 8.94 0.00
 10 30 12 5.40 0.00
 10 30 13 6.01 0.00
 10 32 0 15.65 0.00
 10 32 1 4.48 0.00
 10 32 2 7.28 0.00
 10 32 3 -0.26 0.00
 10 32 4 -2.34 0.00
 10 32 5 0.10 0.00
 10 32 6 -0.48 0.00
 10 32 7 -14.85 0.00
 10 32 8 -6.68 0.00
 10 32 9 -5.34 0.00
 10 32 10 5.58 0.00
 10 32 11 -4.43 0.00
 10 32 12 -1.83 0.00
 10 32 13 -3.88 0.00
 10 34 0 -2.95 0.00
 10 34 1 -14.12 0.00
 10 34 2 -6.89 0.00
 10 34 3 1.70 0.00
 10 34 4 -4.57 0.00
 10 34 5 0.59 0.00
 10 34 6 -4.26 0.00
 10 34 7 6.76 0.00
 10 34 8 -8.33 0.00
 10 34 9 2.72 0.00
 10 34 10 2.43 0.00
 10 34 11 -1.39 0.00
 10 34 12 -6.59 0.00
 10 36 0 12.48 0.00
 10 36 1 -3.23 0.00
 10 36 2 2.73 0.00
 10 36 3 6.91 0.00
 10 36 4 7.40 0.00
 10 36 5 -4.90 0.00
 10 36 6 -8.89 0.00
 10 36 7 -3.35 0.00
 10 36 8 5.33 0.00
 10 36 9 -4.09 0.00
 10 36 10 -7.91 0.00
 10 36 11 -4.57 0.00
 10 38 0 -1.97 0.00
 10 38 1 -1.41 0.00
 10 38 2 -6.22 0.00
 10 38 3 -0.09 0.00
 10 38 4 3.88 0.00
 10 38 5 -1.04 0.00
 10 38 6 -6.00 0.00
 10 38 7 8.32 0.00
 10 38 8 11.45 0.00
 10 38 9 -6.88 0.00
 10 38 10 -24.43 0.00
 10 40 0 -6.35 0.00
 10 40 1 1.32 0.00
 10 40 2 1.45 0.00
 10 40 3 -1.21 0.00
 10 40 4 -1.79 0.00
 10 40 5 -0.52 0.00
 10 40 6 2.68 0.00
 10 40 7 -1.96 0.00
 10 40 8 -11.99 0.00
 10 40 9 0.51 0.00
 10 42 0 -4.46 0.00
 10 42 1 3.98 0.00
 10 42 2 -1.05 0.00
 10 42 3 -5.01 0.00
 10 42 4 -5.58 0.00
 10 42 5 6.16 0.00
 10 42 6 -0.04 0.00
 10 42 7 -3.94 0.00
 10 44 0 -8.67 0.00
 10 44 1 -4.43 0.00
 10 44 2 0.56 0.00
 10 44 3 -0.03 0.00
 10 44 4 4.38 0.00
 11 1 0 -12.22 0.00
 11 1 1 -29.12 0.00
 11 1 2 18.65 0.00
 11 1 3 -7.49 0.00
 11 1 4 -1.26 0.00
 11 1 5 7.48 0.00
 11 1 6 -7.47 0.00
 11 1 7 -12.69 0.00
 11 1 8 -12.97 0.00
 11 1 9 16.96 0.00
 11 1 10 0.48 0.00
 11 1 11 -6.85 0.00
 11 1 12 -5.03 0.00
 11 1 13 -5.99 0.00
 11 1 14 2.40 0.00
 11 1 15 -2.87 0.00
 11 1 16 -12.16 0.00
 11 1 17 -4.87 0.00
 11 1 18 -1.69 0.00
 11 3 0 23.35 0.00
 11 3 1 20.11 0.00
 11 3 2 -19.70 0.00
 11 3 3 -3.92 0.00
 11 3 4 5.97 0.00
 11 3 5 2.73 0.00
 11 3 6 -2.70 0.00
 11 3 7 0.29 0.00
 11 3 8 1.94 0.00
 11 3 9 5.01 0.00
 11 3 10 -0.79 0.00
 11 3 11 -0.02 0.00
 11 3 12 4.15 0.00
 11 3 13 8.12 0.00
 11 3 14 -12.13 0.00
 11 3 15 -10.04 0.00
 11 3 16 6.87 0.00
 11 3 17 2.67 0.00
 11 3 18 1.60 0.00
 11 5 0 -7.26 0.00
 11 5 1 -8.58 0.00
 11 5 2 19.62 0.00
 11 5 3 17.19 0.00
 11 5 4 -10.33 0.00
 11 5 5 2.14 0.00
 11 5 6 -4.66 0.00
 11 5 7 19.22 0.00
 11 5 8 -1.64 0.00
 11 5 9 -6.21 0.00
 11 5 10 7.10 0.00
 11 5 11 6.61 0.00
 11 5 12 2.40 0.00
 11 5 13 2.46 0.00
 11 5 14 1.29 0.00
 11 5 15 5.33 0.00
 11 5 16 0.32 0.00
 11 5 17 6.38 0.00
 11 5 18 3.41 0.00
 11 7 0 22.21 0.00
 11 7 1 20.41 0.00
 11 7 2 -13.09 0.00
 11 7 3 -23.39 0.00
 11 7 4 15.31 0.00
 11 7 5 5.43 0.00
 11 7 6 11.21 0.00
 11 7 7 -17.80 0.00
 11 7 8 -8.06 0.00
 11 7 9 -10.18 0.00
 11 7 10 -12.21 0.00
 11 7 11 8.99 0.00
 11 7 12 -7.99 0.00
 11 7 13 -6.55 0.00
 11 7 14 -1.53 0.00
 11 7 15 0.22 0.00
 11 7 16 1.17 0.00
 11 7 17 -8.02 0.00
 11 7 18 6.14 0.00
 11 9 0 16.71 0.00
 11 9 1 -18.72 0.00
 11 9 2 1.40 0.00
 11 9 3 -3.45 0.00
 11 9 4 -21.05 0.00
 11 9 5 5.51 0.00
 11 9 6 -14.05 0.00
 11 9 7 16.41 0.00
 11 9 8 5.31 0.00
 11 9 9 17.73 0.00
 11 9 10 5.71 0.00
 11 9 11 -8.49 0.00
 11 9 12 7.68 0.00
 11 9 13 3.94 0.00
 11 9 14 -1.70 0.00
 11 9 15 4.22 0.00
 11 9 16 -5.00 0.00
 11 9 17 5.48 0.00
 11 11 0 -1.68 0.00
 11 11 1 -5.11 0.00
 11 11 2 10.01 0.00
 11 11 3 -1.66 0.00
 11 11 4 16.68 0.00
 11 11 5 1.26 0.00
 11 11 6 6.66 0.00
 11 11 7 1.16 0.00
 11 11 8 4.96 0.00
 11 11 9 -12.84 0.00
 11 11 10 2.24 0.00
 11 11 11 -5.09 0.00
 11 11 12 -13.88 0.00
 11 11 13 1.21 0.00
 11 11 14 -2.87 0.00
 11 11 15 -3.91 0.00
 11 11 16 0.11 0.00
 11 11 17 -8.74 0.00
 11 13 0 12.15 0.00
 11 13 1 -4.73 0.00
 11 13 2 -0.30 0.00
 11 13 3 9.29 0.00
 11 13 4 -3.70 0.00
 11 13 5 -15.16 0.00
 11 13 6 6.01 0.00
 11 13 7 9.85 0.00
 11 13 8 -7.65 0.00
 11 13 9 1.86 0.00
 11 13 10 8.71 0.00
 11 13 11 -0.45 0.00
 11 13 12 4.31 0.00
 11 13 13 -6.78 0.00
 11 13 14 -0.02 0.00
 11 13 15 4.36 0.00
 11 13 16 -5.08 0.00
 11 13 17 0.70 0.00
 11 15 0 -6.70 0.00
 11 15 1 -12.49 0.00
 11 15 2 13.79 0.00
 11 15 3 2.43 0.00
 11 15 4 -4.29 0.00
 11 15 5 -1.72 0.00
 11 15 6 -4.93 0.00
 11 15 7 17.70 0.00
 11 15 8 9.42 0.00
 11 15 9 -5.25 0.00
 11 15 10 -0.95 0.00
 11 15 11 0.35 0.00
 11 15 12 1.92 0.00
 11 15 13 -4.31 0.00
 11 15 14 -1.85 0.00
 11 15 15 -3.04 0.00
 11 15 16 0.45 0.00
 11 15 17 1.50 0.00
 11 17 0 18.93 0.00
 11 17 1 -0.97 0.00
 11 17 2 -7.10 0.00
 11 17 3 -0.48 0.00
 11 17 4 12.54 0.00
 11 17 5 -1.58 0.00
 11 17 6 -1.06 0.00
 11 17 7 -9.72 0.00
 11 17 8 4.65 0.00
 11 17 9 2.13 0.00
 11 17 10 4.52 0.00
 11 17 11 -2.84 0.00
 11 17 12 0.54 0.00
 11 17 13 -1.49 0.00
 11 17 14 -2.94 0.00
 11 17 15 -3.01 0.00
 11 17 16 2.37 0.00
 11 19 0 -8.37 0.00
 11 19 1 1.27 0.00
 11 19 2 -2.02 0.00
 11 19 3 -2.19 0.00
 11 19 4 -3.90 0.00
 11 19 5 -1.41 0.00
 11 19 6 -0.82 0.00
 11 19 7 5.74 0.00
 11 19 8 -5.96 0.00
 11 19 9 2.32 0.00
 11 19 10 -2.88 0.00
 11 19 11 -1.40 0.00
 11 19 12 6.25 0.00
 11 19 13 1.74 0.00
 11 19 14 8.44 0.00
 11 19 15 -0.12 0.00
 11 19 16 -7.73 0.00
 11 21 0 -4.07 0.00
 11 21 1 -4.36 0.00
 11 21 2 7.90 0.00
 11 21 3 4.16 0.00
 11 21 4 -0.73 0.00
 11 21 5 -4.63 0.00
 11 21 6 5.96 0.00
 11 21 7 0.58 0.00
 11 21 8 4.78 0.00
 11 21 9 -0.33 0.00
 11 21 10 -1.85 0.00
 11 21 11 4.57 0.00
 11 21 12 -12.25 0.00
 11 21 13 1.82 0.00
 11 21 14 5.45 0.00
 11 21 15 3.54 0.00
 11 21 16 -5.25 0.00
 11 23 0 9.97 0.00
 11 23 1 -9.80 0.00
 11 23 2 4.42 0.00
 11 23 3 -0.60 0.00
 11 23 4 0.87 0.00
 11 23 5 -9.18 0.00
 11 23 6 -11.20 0.00
 11 23 7 -7.37 0.00
 11 23 8 -4.18 0.00
 11 23 9 6.15 0.00
 11 23 10 8.68 0.00
 11 23 11 -5.15 0.00
 11 23 12 1.71 0.00
 11 23 13 1.49 0.00
 11 23 14 0.38 0.00
 11 23 15 -0.35 0.00
 11 25 0 -4.98 0.00
 11 25 1 6.35 0.00
 11 25 2 -5.92 0.00
 11 25 3 10.37 0.00
 11 25 4 2.22 0.00
 11 25 5 4.35 0.00
 11 25 6 7.31 0.00
 11 25 7 7.82 0.00
 11 25 8 -1.20 0.00
 11 25 9 -2.99 0.00
 11 25 10 -12.08 0.00
 11 25 11 4.66 0.00
 11 25 12 -0.22 0.00
 11 25 13 1.39 0.00
 11 25 14 -1.08 0.00
 11 25 15 -1.69 0.00
 11 27 0 -1.67 0.00
 11 27 1 -6.52 0.00
 11 27 2 6.35 0.00
 11 27 3 1.87 0.00
 11 27 4 -1.78 0.00
 11 27 5 -5.48 0.00
 11 27 6 -6.62 0.00
 11 27 7 0.50 0.00
 11 27 8 0.43 0.00
 11 27 9 1.41 0.00
 11 27 10 6.61 0.00
 11 27 11 -1.24 0.00
 11 27 12 -1.08 0.00
 11 27 13 1.63 0.00
 11 27 14 1.28 0.00
 11 29 0 1.30 0.00
 11 29 1 6.83 0.00
 11 29 2 1.82 0.00
 11 29 3 -10.38 0.00
 11 29 4 2.30 0.00
 11 29 5 3.03 0.00
 11 29 6 -1.89 0.00
 11 29 7 -1.41 0.00
 11 29 8 -7.76 0.00
 11 29 9 10.05 0.00
 11 29 10 0.75 0.00
 11 29 11 -5.09 0.00
 11 29 12 -1.89 0.00
 11 29 13 4.83 0.00
 11 31 0 -1.55 0.00
 11 31 1 9.95 0.00
 11 31 2 -3.87 0.00
 11 31 3 8.14 0.00
 11 31 4 8.65 0.00
 11 31 5 3.33 0.00
 11 31 6 3.66 0.00
 11 31 7 8.74 0.00
 11 31 8 3.58 0.00
 11 31 9 -1.40 0.00
 11 31 10 -2.56 0.00
 11 31 11 -5.61 0.00
 11 31 12 1.03 0.00
 11 33 0 11.26 0.00
 11 33 1 -17.72 0.00
 11 33 2 2.14 0.00
 11 33 3 0.80 0.00
 11 33 4 -5.52 0.00
 11 33 5 4.61 0.00
 11 33 6 2.96 0.00
 11 33 7 -6.50 0.00
 11 33 8 -2.22 0.00
 11 33 9 0.04 0.00
 11 33 10 -0.79 0.00
 11 33 11 -1.79 0.00
 11 33 12 -1.89 0.00
 11 35 0 -10.46 0.00
 11 35 1 4.05 0.00
 11 35 2 -4.96 0.00
 11 35 3 8.31 0.00
 11 35 4 3.03 0.00
 11 35 5 -6.04 0.00
 11 35 6 -1.59 0.00
 11 35 7 22.17 0.00
 11 35 8 -2.72 0.00
 11 35 9 7.19 0.00
 11 35 10 -0.85 0.00
 11 35 11 4.41 0.00
 11 37 0 6.44 0.00
 11 37 1 5.49 0.00
 11 37 2 6.28 0.00
 11 37 3 10.50 0.00
 11 37 4 -1.54 0.00
 11 37 5 5.02 0.00
 11 37 6 -3.18 0.00
 11 37 7 8.63 0.00
 11 37 8 -6.00 0.00
 11 37 9 2.56 0.00
 11 37 10 -0.19 0.00
 11 39 0 -4.74 0.00
 11 39 1 14.27 0.00
 11 39 2 -5.09 0.00
 11 39 3 -12.82 0.00
 11 39 4 -0.70 0.00
 11 39 5 1.10 0.00
 11 39 6 5.03 0.00
 11 39 7 -12.60 0.00
 11 39 8 -32.19 0.00
 11 39 9 2.06 0.00
 11 41 0 13.25 0.00
 11 41 1 13.57 0.00
 11 41 2 -8.60 0.00
 11 41 3 -1.42 0.00
 11 41 4 -1.59 0.00
 11 41 5 11.99 0.00
 11 41 6 -4.28 0.00
 11 41 7 -11.39 0.00
 11 43 0 -2.11 0.00
 11 43 1 -13.12 0.00
 11 43 2 -2.17 0.00
 11 43 3 9.68 0.00
 11 43 4 0.99 0.00
 11 43 5 -5.08 0.00
 12 0 2 21.88 0.00
 12 0 4 -2.18 0.00
 12 0 6 18.04 0.00
 12 0 8 4.04 0.00
 12 0 10 5.45 0.00
 12 0 12 -1.69 0.00
 12 0 14 -2.41 0.00
 12 0 16 7.45 0.00
 12 2 0 -37.56 0.00
 12 2 1 -0.92 0.00
 12 2 2 -10.51 0.00
 12 2 3 8.44 0.00
 12 2 4 -0.76 0.00
 12 2 5 -15.72 0.00
 12 2 6 -6.67 0.00
 12 2 7 -2.48 0.00
 12 2 8 6.66 0.00
 12 2 9 -0.04 0.00
 12 2 10 0.11 0.00
 12 2 11 -5.72 0.00
 12 2 12 0.80 0.00
 12 2 13 5.41 0.00
 12 2 14 -1.31 0.00
 12 2 15 9.66 0.00
 12 2 16 -9.67 0.00
 12 2 17 -6.77 0.00
 12 4 0 36.71 0.00
 12 4 1 4.57 0.00
 12 4 2 -20.89 0.00
 12 4 3 -4.23 0.00
 12 4 4 3.37 0.00
 12 4 5 9.38 0.00
 12 4 6 7.37 0.00
 12 4 7 -2.55 0.00
 12 4 8 -0.48 0.00
 12 4 9 14.03 0.00
 12 4 10 5.86 0.00
 12 4 11 -2.17 0.00
 12 4 12 -0.39 0.00
 12 4 13 -7.01 0.00
 12 4 14 -3.07 0.00
 12 4 15 -1.90 0.00
 12 4 16 5.97 0.00
 12 4 17 1.31 0.00
 12 6 0 -8.35 0.00
 12 6 1 0.14 0.00
 12 6 2 36.70 0.00
 12 6 3 -4.15 0.00
 12 6 4 0.02 0.00
 12 6 5 2.10 0.00
 12 6 6 7.73 0.00
 12 6 7 0.36 0.00
 12 6 8 -7.71 0.00
 12 6 9 10.65 0.00
 12 6 10 -4.31 0.00
 12 6 11 -10.30 0.00
 12 6 12 -10.64 0.00
 12 6 13 2.53 0.00
 12 6 14 -2.37 0.00
 12 6 15 4.33 0.00
 12 6 16 -0.57 0.00
 12 6 17 0.51 0.00
 12 8 0 -17.72 0.00
 12 8 1 4.82 0.00
 12 8 2 -17.87 0.00
 12 8 3 16.91 0.00
 12 8 4 -11.99 0.00
 12 8 5 -8.11 0.00
 12 8 6 -11.04 0.00
 12 8 7 -5.17 0.00
 12 8 8 1.75 0.00
 12 8 9 -9.27 0.00
 12 8 10 10.09 0.00
 12 8 11 1.48 0.00
 12 8 12 6.62 0.00
 12 8 13 1.31 0.00
 12 8 14 -2.41 0.00
 12 8 15 -2.49 0.00
 12 8 16 -3.59 0.00
 12 8 17 -10.07 0.00
 12 10 0 -1.20 0.00
 12 10 1 13.10 0.00
 12 10 2 8.50 0.00
 12 10 3 -19.41 0.00
 12 10 4 7.66 0.00
 12 10 5 10.03 0.00
 12 10 6 9.45 0.00
 12 10 7 7.38 0.00
 12 10 8 1.60 0.00
 12 10 9 11.76 0.00
 12 10 10 -1.61 0.00
 12 10 11 8.23 0.00
 12 10 12 -6.56 0.00
 12 10 13 -0.64 0.00
 12 10 14 2.61 0.00
 12 10 15 1.44 0.00
 12 10 16 6.08 0.00
 12 10 17 12.27 0.00
 12 12 0 -18.97 0.00
 12 12 1 3.21 0.00
 12 12 2 0.11 0.00
 12 12 3 5.19 0.00
 12 12 4 -1.91 0.00
 12 12 5 -0.15 0.00
 12 12 6 1.30 0.00
 12 12 7 2.51 0.00
 12 12 8 -2.47 0.00
 12 12 9 -1.91 0.00
 12 12 10 -1.96 0.00
 12 12 11 -14.36 0.00
 12 12 12 8.65 0.00
 12 12 13 0.14 0.00
 12 12 14 -3.63 0.00
 12 12 15 -3.17 0.00
 12 12 16 0.60 0.00
 12 12 17 -11.78 0.00
 12 14 0 -12.47 0.00
 12 14 1 -1.36 0.00
 12 14 2 -16.34 0.00
 12 14 3 2.38 0.00
 12 14 4 -15.86 0.00
 12 14 5 0.09 0.00
 12 14 6 -2.69 0.00
 12 14 7 1.19 0.00
 12 14 8 0.50 0.00
 12 14 9 -1.42 0.00
 12 14 10 0.45 0.00
 12 14 11 3.38 0.00
 12 14 12 4.34 0.00
 12 14 13 6.41 0.00
 12 14 14 -8.36 0.00
 12 14 15 -4.41 0.00
 12 14 16 7.07 0.00
 12 14 17 -5.10 0.00
 12 16 0 -15.77 0.00
 12 16 1 8.40 0.00
 12 16 2 -3.67 0.00
 12 16 3 -9.30 0.00
 12 16 4 15.14 0.00
 12 16 5 5.06 0.00
 12 16 6 3.75 0.00
 12 16 7 1.87 0.00
 12 16 8 2.32 0.00
 12 16 9 4.47 0.00
 12 16 10 -6.24 0.00
 12 16 11 0.31 0.00
 12 16 12 1.51 0.00
 12 16 13 3.19 0.00
 12 16 14 1.35 0.00
 12 16 15 -4.81 0.00
 12 16 16 -0.29 0.00
 12 18 0 -4.33 0.00
 12 18 1 -3.76 0.00
 12 18 2 -10.38 0.00
 12 18 3 4.05 0.00
 12 18 4 -1.10 0.00
 12 18 5 0.91 0.00
 12 18 6 -16.51 0.00
 12 18 7 4.94 0.00
 12 18 8 6.78 0.00
 12 18 9 -4.93 0.00
 12 18 10 -2.92 0.00
 12 18 11 -3.73 0.00
 12 18 12 2.04 0.00
 12 18 13 -6.40 0.00
 12 18 14 -3.16 0.00
 12 18 15 -1.39 0.00
 12 18 16 2.89 0.00
 12 20 0 -8.71 0.00
 12 20 1 8.12 0.00
 12 20 2 -6.81 0.00
 12 20 3 -8.40 0.00
 12 20 4 -5.03 0.00
 12 20 5 4.83 0.00
 12 20 6 1.20 0.00
 12 20 7 -8.16 0.00
 12 20 8 -6.39 0.00
 12 20 9 13.66 0.00
 12 20 10 2.42 0.00
 12 20 11 4.49 0.00
 12 20 12 -7.63 0.00
 12 20 13 12.38 0.00
 12 20 14 0.55 0.00
 12 20 15 -2.14 0.00
 12 20 16 2.18 0.00
 12 22 0 -0.80 0.00
 12 22 1 -5.72 0.00
 12 22 2 14.62 0.00
 12 22 3 4.22 0.00
 12 22 4 4.11 0.00
 12 22 5 -1.76 0.00
 12 22 6 0.11 0.00
 12 22 7 -0.95 0.00
 12 22 8 -3.13 0.00
 12 22 9 -10.47 0.00
 12 22 10 -0.62 0.00
 12 22 11 0.51 0.00
 12 22 12 -6.96 0.00
 12 22 13 -0.58 0.00
 12 22 14 6.02 0.00
 12 22 15 2.30 0.00
 12 24 0 -7.80 0.00
 12 24 1 -2.79 0.00
 12 24 2 -7.34 0.00
 12 24 3 -2.88 0.00
 12 24 4 -8.52 0.00
 12 24 5 -4.42 0.00
 12 24 6 2.08 0.00
 12 24 7 7.56 0.00
 12 24 8 3.36 0.00
 12 24 9 7.89 0.00
 12 24 10 0.44 0.00
 12 24 11 0.62 0.00
 12 24 12 -0.78 0.00
 12 24 13 -1.95 0.00
 12 24 14 1.41 0.00
 12 24 15 -4.10 0.00
 12 26 0 7.89 0.00
 12 26 1 3.90 0.00
 12 26 2 5.21 0.00
 12 26 3 -1.14 0.00
 12 26 4 4.88 0.00
 12 26 5 0.32 0.00
 12 26 6 -3.94 0.00
 12 26 7 -8.60 0.00
 12 26 8 -5.73 0.00
 12 26 9 -2.81 0.00
 12 26 10 -6.52 0.00
 12 26 11 -5.26 0.00
 12 26 12 1.96 0.00
 12 26 13 11.58 0.00
 12 26 14 -0.81 0.00
 12 28 0 5.45 0.00
 12 28 1 -0.81 0.00
 12 28 2 -1.91 0.00
 12 28 3 5.16 0.00
 12 28 4 0.01 0.00
 12 28 5 0.66 0.00
 12 28 6 1.69 0.00
 12 28 7 0.77 0.00
 12 28 8 0.02 0.00
 12 28 9 2.75 0.00
 12 28 10 4.68 0.00
 12 28 11 -2.64 0.00
 12 28 12 -5.67 0.00
 12 28 13 -4.48 0.00
 12 30 0 -1.09 0.00
 12 30 1 1.07 0.00
 12 30 2 -4.34 0.00
 12 30 3 -5.72 0.00
 12 30 4 3.50 0.00
 12 30 5 -3.71 0.00
 12 30 6 -0.67 0.00
 12 30 7 3.99 0.00
 12 30 8 3.85 0.00
 12 30 9 4.61 0.00
 12 30 10 -2.65 0.00
 12 30 11 8.82 0.00
 12 30 12 4.15 0.00
 12 32 0 14.61 0.00
 12 32 1 4.32 0.00
 12 32 2 7.88 0.00
 12 32 3 -0.28 0.00
 12 32 4 -1.32 0.00
 12 32 5 0.66 0.00
 12 32 6 -2.85 0.00
 12 32 7 -6.11 0.00
 12 32 8 -7.50 0.00
 12 32 9 -3.51 0.00
 12 32 10 -1.39 0.00
 12 32 11 -7.02 0.00
 12 32 12 -1.02 0.00
 12 34 0 9.22 0.00
 12 34 1 -3.78 0.00
 12 34 2 -9.00 0.00
 12 34 3 -2.80 0.00
 12 34 4 0.69 0.00
 12 34 5 2.30 0.00
 12 34 6 -9.25 0.00
 12 34 7 -6.54 0.00
 12 34 8 4.31 0.00
 12 34 9 7.21 0.00
 12 34 10 7.19 0.00
 12 34 11 8.03 0.00
 12 36 0 13.73 0.00
 12 36 1 -2.31 0.00
 12 36 2 -2.95 0.00
 12 36 3 2.71 0.00
 12 36 4 -5.24 0.00
 12 36 5 1.15 0.00
 12 36 6 -4.08 0.00
 12 36 7 -0.17 0.00
 12 36 8 -1.24 0.00
 12 36 9 1.77 0.00
 12 36 10 -5.04 0.00
 12 38 0 27.78 0.00
 12 38 1 -2.84 0.00
 12 38 2 0.52 0.00
 12 38 3 -8.41 0.00
 12 38 4 4.06 0.00
 12 38 5 4.93 0.00
 12 38 6 7.36 0.00
 12 38 7 -1.12 0.00
 12 38 8 -0.97 0.00
 12 38 9 -6.18 0.00
 12 40 0 -7.15 0.00
 12 40 1 5.63 0.00
 12 40 2 -9.02 0.00
 12 40 3 4.23 0.00
 12 40 4 1.60 0.00
 12 40 5 -5.51 0.00
 12 40 6 -7.26 0.00
 12 40 7 -4.30 0.00
 12 42 0 -15.40 0.00
 12 42 1 -4.73 0.00
 12 42 2 8.15 0.00
 12 42 3 -3.01 0.00
 12 42 4 2.63 0.00
 12 42 5 0.70 0.00
 12 44 0 -20.82 0.00
 13 1 0 -9.42 0.00
 13 1 1 -5.23 0.00
 13 1 2 9.21 0.00
 13 1 3 15.15 0.00
 13 1 4 -1.34 0.00
 13 1 5 -14.84 0.00
 13 1 6 -9.79 0.00
 13 1 7 2.44 0.00
 13 1 8 -1.19 0.00
 13 1 9 -9.45 0.00
 13 1 10 1.83 0.00
 13 1 11 -2.78 0.00
 13 1 12 -0.80 0.00
 13 1 13 -6.47 0.00
 13 1 14 -12.06 0.00
 13 1 15 -1.98 0.00
 13 1 16 1.69 0.00
 13 1 17 -17.66 0.00
 13 3 0 -3.88 0.00
 13 3 1 -7.11 0.00
 13 3 2 -0.14 0.00
 13 3 3 -1.96 0.00
 13 3 4 -3.53 0.00
 13 3 5 -1.58 0.00
 13 3 6 -6.11 0.00
 13 3 7 4.54 0.00
 13 3 8 0.73 0.00
 13 3 9 6.97 0.00
 13 3 10 8.78 0.00
 13 3 11 8.81 0.00
 13 3 12 12.66 0.00
 13 3 13 -3.71 0.00
 13 3 14 6.86 0.00
 13 3 15 -4.68 0.00
 13 3 16 -23.44 0.00
 13 3 17 22.96 0.00
 13 5 0 17.06 0.00
 13 5 1 1.14 0.00
 13 5 2 -8.13 0.00
 13 5 3 10.72 0.00
 13 5 4 6.72 0.00
 13 5 5 6.44 0.00
 13 5 6 -0.90 0.00
 13 5 7 -5.05 0.00
 13 5 8 0.11 0.00
 13 5 9 6.06 0.00
 13 5 10 3.18 0.00
 13 5 11 -2.43 0.00
 13 5 12 -8.29 0.00
 13 5 13 3.71 0.00
 13 5 14 2.22 0.00
 13 5 15 -1.83 0.00
 13 5 16 12.51 0.00
 13 5 17 2.61 0.00
 13 7 0 -7.51 0.00
 13 7 1 -8.83 0.00
 13 7 2 3.33 0.00
 13 7 3 -2.15 0.00
 13 7 4 1.99 0.00
 13 7 5 -16.26 0.00
 13 7 6 5.28 0.00
 13 7 7 -1.78 0.00
 13 7 8 4.90 0.00
 13 7 9 -8.47 0.00
 13 7 10 -3.90 0.00
 13 7 11 0.28 0.00
 13 7 12 0.66 0.00
 13 7 13 -1.13 0.00
 13 7 14 -1.04 0.00
 13 7 15 3.35 0.00
 13 7 16 4.42 0.00
 13 7 17 -12.34 0.00
 13 9 0 16.48 0.00
 13 9 1 6.32 0.00
 13 9 2 -4.22 0.00
 13 9 3 -12.20 0.00
 13 9 4 -3.82 0.00
 13 9 5 7.82 0.00
 13 9 6 -2.80 0.00
 13 9 7 1.09 0.00
 13 9 8 -6.85 0.00
 13 9 9 -3.03 0.00
 13 9 10 -2.57 0.00
 13 9 11 10.78 0.00
 13 9 12 9.01 0.00
 13 9 13 -3.25 0.00
 13 9 14 -3.59 0.00
 13 9 15 3.45 0.00
 13 9 16 -4.35 0.00
 13 9 17 15.14 0.00
 13 11 0 0.28 0.00
 13 11 1 -3.37 0.00
 13 11 2 10.01 0.00
 13 11 3 6.78 0.00
 13 11 4 -1.74 0.00
 13 11 5 -0.09 0.00
 13 11 6 11.46 0.00
 13 11 7 0.52 0.00
 13 11 8 5.54 0.00
 13 11 9 -1.18 0.00
 13 11 10 11.09 0.00
 13 11 11 -11.32 0.00
 13 11 12 -8.70 0.00
 13 11 13 0.09 0.00
 13 11 14 -2.09 0.00
 13 11 15 -3.76 0.00
 13 11 16 -1.38 0.00
 13 11 17 -20.83 0.00
 13 13 0 1.53 0.00
 13 13 1 -0.48 0.00
 13 13 2 16.78 0.00
 13 13 3 -15.32 0.00
 13 13 4 2.26 0.00
 13 13 5 -3.43 0.00
 13 13 6 -8.49 0.00
 13 13 7 -3.25 0.00
 13 13 8 4.33 0.00
 13 13 9 -1.01 0.00
 13 13 10 0.62 0.00
 13 13 11 0.07 0.00
 13 13 12 -6.76 0.00
 13 13 13 -3.83 0.00
 13 13 14 7.65 0.00
 13 13 15 2.09 0.00
 13 13 16 -1.74 0.00
 13 15 0 9.83 0.00
 13 15 1 0.77 0.00
 13 15 2 -5.96 0.00
 13 15 3 6.75 0.00
 13 15 4 1.33 0.00
 13 15 5 7.91 0.00
 13 15 6 -3.89 0.00
 13 15 7 9.66 0.00
 13 15 8 0.75 0.00
 13 15 9 6.04 0.00
 13 15 10 5.91 0.00
 13 15 11 -8.45 0.00
 13 15 12 12.43 0.00
 13 15 13 -2.14 0.00
 13 15 14 4.79 0.00
 13 15 15 2.75 0.00
 13 15 16 -4.23 0.00
 13 17 0 -2.40 0.00
 13 17 1 -3.50 0.00
 13 17 2 7.94 0.00
 13 17 3 -0.49 0.00
 13 17 4 -2.29 0.00
 13 17 5 -14.54 0.00
 13 17 6 4.76 0.00
 13 17 7 3.03 0.00
 13 17 8 -0.88 0.00
 13 17 9 -8.15 0.00
 13 17 10 4.27 0.00
 13 17 11 -1.33 0.00
 13 17 12 -6.37 0.00
 13 17 13 -8.09 0.00
 13 17 14 -7.67 0.00
 13 17 15 -2.69 0.00
 13 17 16 0.01 0.00
 13 19 0 0.04 0.00
 13 19 1 -0.85 0.00
 13 19 2 -4.15 0.00
 13 19 3 -5.78 0.00
 13 19 4 2.35 0.00
 13 19 5 7.64 0.00
 13 19 6 -12.15 0.00
 13 19 7 2.33 0.00
 13 19 8 1.18 0.00
 13 19 9 7.00 0.00
 13 19 10 -4.28 0.00
 13 19 11 2.12 0.00
 13 19 12 11.01 0.00
 13 19 13 -0.61 0.00
 13 19 14 12.20 0.00
 13 19 15 0.61 0.00
 13 21 0 -1.34 0.00
 13 21 1 -1.40 0.00
 13 21 2 -4.98 0.00
 13 21 3 -0.46 0.00
 13 21 4 -0.54 0.00
 13 21 5 4.68 0.00
 13 21 6 2.08 0.00
 13 21 7 -7.52 0.00
 13 21 8 4.35 0.00
 13 21 9 1.63 0.00
 13 21 10 -6.60 0.00
 13 21 11 -7.06 0.00
 13 21 12 -4.58 0.00
 13 21 13 -1.37 0.00
 13 21 14 -2.46 0.00
 13 21 15 3.75 0.00
 13 23 0 -4.16 0.00
 13 23 1 3.08 0.00
 13 23 2 18.55 0.00
 13 23 3 -4.15 0.00
 13 23 4 -2.87 0.00
 13 23 5 -6.54 0.00
 13 23 6 0.35 0.00
 13 23 7 -0.61 0.00
 13 23 8 -3.21 0.00
 13 23 9 4.17 0.00
 13 23 10 2.82 0.00
 13 23 11 8.92 0.00
 13 23 12 -5.07 0.00
 13 23 13 -1.55 0.00
 13 23 14 4.31 0.00
 13 25 0 -6.17 0.00
 13 25 1 -11.24 0.00
 13 25 2 -9.37 0.00
 13 25 3 13.24 0.00
 13 25 4 1.27 0.00
 13 25 5 5.19 0.00
 13 25 6 -3.56 0.00
 13 25 7 -0.22 0.00
 13 25 8 -0.94 0.00
 13 25 9 -6.43 0.00
 13 25 10 0.33 0.00
 13 25 11 -6.26 0.00
 13 25 12 -1.90 0.00
 13 25 13 1.37 0.00
 13 25 14 3.92 0.00
 13 27 0 3.14 0.00
 13 27 1 -0.86 0.00
 13 27 2 3.09 0.00
 13 27 3 0.56 0.00
 13 27 4 3.78 0.00
 13 27 5 -6.41 0.00
 13 27 6 1.23 0.00
 13 27 7 0.21 0.00
 13 27 8 -4.23 0.00
 13 27 9 10.27 0.00
 13 27 10 -2.85 0.00
 13 27 11 3.90 0.00
 13 27 12 -0.78 0.00
 13 27 13 -0.91 0.00
 13 29 0 2.08 0.00
 13 29 1 2.38 0.00
 13 29 2 -0.29 0.00
 13 29 3 -4.14 0.00
 13 29 4 2.70 0.00
 13 29 5 -3.95 0.00
 13 29 6 -2.44 0.00
 13 29 7 3.04 0.00
 13 29 8 -1.96 0.00
 13 29 9 -4.86 0.00
 13 29 10 2.24 0.00
 13 29 11 3.18 0.00
 13 29 12 13.67 0.00
 13 31 0 -2.96 0.00
 13 31 1 -5.12 0.00
 13 31 2 -3.99 0.00
 13 31 3 -0.40 0.00
 13 31 4 2.56 0.00
 13 31 5 7.17 0.00
 13 31 6 8.94 0.00
 13 31 7 -5.45 0.00
 13 31 8 -4.26 0.00
 13 31 9 2.68 0.00
 13 31 10 -1.14 0.00
 13 31 11 -4.98 0.00
 13 33 0 0.41 0.00
 13 33 1 -5.56 0.00
 13 33 2 4.72 0.00
 13 33 3 11.24 0.00
 13 33 4 3.34 0.00
 13 33 5 -13.44 0.00
 13 33 6 0.67 0.00
 13 33 7 8.64 0.00
 13 33 8 4.81 0.00
 13 33 9 9.64 0.00
 13 33 10 -0.46 0.00
 13 33 11 -1.23 0.00
 13 35 0 -2.17 0.00
 13 35 1 -14.01 0.00
 13 35 2 -5.85 0.00
 13 35 3 4.65 0.00
 13 35 4 -4.10 0.00
 13 35 5 5.03 0.00
 13 35 6 -2.06 0.00
 13 35 7 -5.08 0.00
 13 35 8 0.15 0.00
 13 35 9 3.45 0.00
 13 35 10 -10.98 0.00
 13 37 0 2.64 0.00
 13 37 1 15.71 0.00
 13 37 2 -0.47 0.00
 13 37 3 5.08 0.00
 13 37 4 0.08 0.00
 13 37 5 -1.50 0.00
 13 37 6 0.51 0.00
 13 37 7 13.24 0.00
 13 37 8 -6.71 0.00
 13 37 9 28.17 0.00
 13 39 0 3.59 0.00
 13 39 1 3.22 0.00
 13 39 2 -3.12 0.00
 13 39 3 -0.75 0.00
 13 39 4 -4.16 0.00
 13 39 5 -11.05 0.00
 13 39 6 0.10 0.00
 13 39 7 -12.28 0.00
 13 41 0 -4.81 0.00
 13 41 1 0.61 0.00
 13 41 2 -6.54 0.00
 13 41 3 -1.93 0.00
 13 41 4 -3.58 0.00
 13 41 5 19.58 0.00
 13 43 0 11.50 0.00
 13 43 1 -0.43 0.00
 13 43 2 -3.16 0.00
 14 0 0 -0.68 0.00
 14 0 2 16.37 0.00
 14 0 4 5.27 0.00
 14 0 6 16.25 0.00
 14 0 8 -5.44 0.00
 14 0 10 1.94 0.00
 14 0 12 -0.20 0.00
 14 0 14 -11.59 0.00
 14 0 16 -2.54 0.00
 14 2 0 14.73 0.00
 14 2 1 10.41 0.00
 14 2 2 -15.94 0.00
 14 2 3 -14.11 0.00
 14 2 4 -16.61 0.00
 14 2 5 10.31 0.00
 14 2 6 -3.14 0.00
 14 2 7 -4.75 0.00
 14 2 8 0.09 0.00
 14 2 9 12.28 0.00
 14 2 10 6.53 0.00
 14 2 11 -9.56 0.00
 14 2 12 2.66 0.00
 14 2 13 2.67 0.00
 14 2 14 6.27 0.00
 14 2 15 10.97 0.00
 14 2 16 -7.53 0.00
 14 4 0 -15.61 0.00
 14 4 1 -9.41 0.00
 14 4 2 10.23 0.00
 14 4 3 13.79 0.00
 14 4 4 4.08 0.00
 14 4 5 -8.67 0.00
 14 4 6 1.49 0.00
 14 4 7 -3.33 0.00
 14 4 8 9.62 0.00
 14 4 9 5.32 0.00
 14 4 10 -6.38 0.00
 14 4 11 3.88 0.00
 14 4 12 -7.54 0.00
 14 4 13 -6.95 0.00
 14 4 14 0.38 0.00
 14 4 15 1.47 0.00
 14 4 16 9.08 0.00
 14 4 17 3.46 0.00
 14 6 0 13.43 0.00
 14 6 1 3.29 0.00
 14 6 2 6.16 0.00
 14 6 3 -4.29 0.00
 14 6 4 1.19 0.00
 14 6 5 -2.88 0.00
 14 6 6 0.53 0.00
 14 6 7 0.76 0.00
 14 6 8 -7.84 0.00
 14 6 9 10.37 0.00
 14 6 10 -0.20 0.00
 14 6 11 0.42 0.00
 14 6 12 -0.25 0.00
 14 6 13 0.77 0.00
 14 6 14 -3.70 0.00
 14 6 15 1.16 0.00
 14 6 16 -0.25 0.00
 14 6 17 -0.45 0.00
 14 8 0 -5.97 0.00
 14 8 1 10.78 0.00
 14 8 2 -10.01 0.00
 14 8 3 1.92 0.00
 14 8 4 -7.40 0.00
 14 8 5 4.08 0.00
 14 8 6 2.42 0.00
 14 8 7 -6.81 0.00
 14 8 8 -1.35 0.00
 14 8 9 4.17 0.00
 14 8 10 8.41 0.00
 14 8 11 -8.01 0.00
 14 8 12 1.79 0.00
 14 8 13 5.72 0.00
 14 8 14 2.92 0.00
 14 8 15 -2.35 0.00
 14 8 16 -3.38 0.00
 14 10 0 -4.31 0.00
 14 10 1 -1.94 0.00
 14 10 2 1.80 0.00
 14 10 3 -3.46 0.00
 14 10 4 2.85 0.00
 14 10 5 -0.12 0.00
 14 10 6 4.41 0.00
 14 10 7 3.55 0.00
 14 10 8 -5.50 0.00
 14 10 9 2.43 0.00
 14 10 10 -3.12 0.00
 14 10 11 6.88 0.00
 14 10 12 -6.34 0.00
 14 10 13 1.38 0.00
 14 10 14 -7.45 0.00
 14 10 15 -0.08 0.00
 14 10 16 2.92 0.00
 14 12 0 0.93 0.00
 14 12 1 4.84 0.00
 14 12 2 -12.47 0.00
 14 12 3 1.01 0.00
 14 12 4 3.04 0.00
 14 12 5 1.29 0.00
 14 12 6 -8.95 0.00
 14 12 7 6.98 0.00
 14 12 8 3.95 0.00
 14 12 9 -9.63 0.00
 14 12 10 -0.42 0.00
 14 12 11 1.60 0.00
 14 12 12 7.86 0.00
 14 12 13 -6.10 0.00
 14 12 14 4.40 0.00
 14 12 15 1.30 0.00
 14 12 16 -1.96 0.00
 14 14 0 -33.28 0.00
 14 14 1 5.06 0.00
 14 14 2 -9.08 0.00
 14 14 3 -7.94 0.00
 14 14 4 -4.99 0.00
 14 14 5 3.79 0.00
 14 14 6 0.19 0.00
 14 14 7 -5.11 0.00
 14 14 8 3.95 0.00
 14 14 9 0.14 0.00
 14 14 10 -1.14 0.00
 14 14 11 -6.44 0.00
 14 14 12 5.69 0.00
 14 14 13 1.29 0.00
 14 14 14 2.49 0.00
 14 14 15 -1.98 0.00
 14 14 16 -0.10 0.00
 14 16 0 0.72 0.00
 14 16 1 0.97 0.00
 14 16 2 5.46 0.00
 14 16 3 -6.17 0.00
 14 16 4 2.08 0.00
 14 16 5 4.99 0.00
 14 16 6 2.20 0.00
 14 16 7 2.81 0.00
 14 16 8 -6.35 0.00
 14 16 9 3.06 0.00
 14 16 10 -7.20 0.00
 14 16 11 5.92 0.00
 14 16 12 -3.63 0.00
 14 16 13 2.23 0.00
 14 16 14 -5.42 0.00
 14 16 15 -14.94 0.00
 14 18 0 -19.27 0.00
 14 18 1 -3.60 0.00
 14 18 2 -9.88 0.00
 14 18 3 4.14 0.00
 14 18 4 -3.03 0.00
 14 18 5 -2.87 0.00
 14 18 6 1.09 0.00
 14 18 7 -5.06 0.00
 14 18 8 4.92 0.00
 14 18 9 -2.85 0.00
 14 18 10 4.17 0.00
 14 18 11 -13.59 0.00
 14 18 12 7.95 0.00
 14 18 13 2.61 0.00
 14 18 14 4.73 0.00
 14 18 15 2.03 0.00
 14 20 0 -3.38 0.00
 14 20 1 -3.42 0.00
 14 20 2 4.83 0.00
 14 20 3 0.38 0.00
 14 20 4 3.46 0.00
 14 20 5 -2.50 0.00
 14 20 6 -5.75 0.00
 14 20 7 4.87 0.00
 14 20 8 -2.02 0.00
 14 20 9 2.23 0.00
 14 20 10 -6.81 0.00
 14 20 11 12.44 0.00
 14 20 12 -6.06 0.00
 14 20 13 -10.75 0.00
 14 20 14 -2.97 0.00
 14 20 15 2.31 0.00
 14 22 0 3.07 0.00
 14 22 1 2.96 0.00
 14 22 2 9.96 0.00
 14 22 3 -1.16 0.00
 14 22 4 1.44 0.00
 14 22 5 4.31 0.00
 14 22 6 1.55 0.00
 14 22 7 -9.87 0.00
 14 22 8 -0.30 0.00
 14 22 9 -2.35 0.00
 14 22 10 4.32 0.00
 14 22 11 -2.43 0.00
 14 22 12 -0.08 0.00
 14 22 13 7.59 0.00
 14 22 14 1.52 0.00
 14 24 0 -8.08 0.00
 14 24 1 0.80 0.00
 14 24 2 -7.21 0.00
 14 24 3 -5.83 0.00
 14 24 4 -4.31 0.00
 14 24 5 -0.90 0.00
 14 24 6 4.37 0.00
 14 24 7 -3.67 0.00
 14 24 8 3.60 0.00
 14 24 9 4.99 0.00
 14 24 10 4.02 0.00
 14 24 11 -8.18 0.00
 14 24 12 -6.80 0.00
 14 24 13 4.00 0.00
 14 24 14 4.80 0.00
 14 26 0 7.91 0.00
 14 26 1 -7.99 0.00
 14 26 2 12.68 0.00
 14 26 3 12.47 0.00
 14 26 4 0.66 0.00
 14 26 5 0.82 0.00
 14 26 6 2.02 0.00
 14 26 7 0.89 0.00
 14 26 8 -3.77 0.00
 14 26 9 -4.12 0.00
 14 26 10 1.94 0.00
 14 26 11 9.36 0.00
 14 26 12 3.03 0.00
 14 26 13 -3.01 0.00
 14 28 0 -15.89 0.00
 14 28 1 5.99 0.00
 14 28 2 5.19 0.00
 14 28 3 -5.07 0.00
 14 28 4 -5.99 0.00
 14 28 5 0.38 0.00
 14 28 6 1.81 0.00
 14 28 7 -2.06 0.00
 14 28 8 9.83 0.00
 14 28 9 -2.99 0.00
 14 28 10 -0.46 0.00
 14 28 11 -2.24 0.00
 14 28 12 -0.17 0.00
 14 30 0 6.46 0.00
 14 30 1 -4.80 0.00
 14 30 2 -5.33 0.00
 14 30 3 -3.29 0.00
 14 30 4 5.57 0.00
 14 30 5 0.16 0.00
 14 30 6 5.15 0.00
 14 30 7 1.89 0.00
 14 30 8 4.69 0.00
 14 30 9 9.45 0.00
 14 30 10 6.72 0.00
 14 30 11 3.27 0.00
 14 32 0 3.78 0.00
 14 32 1 0.71 0.00
 14 32 2 2.43 0.00
 14 32 3 -0.48 0.00
 14 32 4 7.29 0.00
 14 32 5 -3.25 0.00
 14 32 6 -6.08 0.00
 14 32 7 -1.55 0.00
 14 32 8 4.18 0.00
 14 32 9 -2.67 0.00
 14 32 10 -3.63 0.00
 14 34 0 3.62 0.00
 14 34 1 7.25 0.00
 14 34 2 0.02 0.00
 14 34 3 -4.72 0.00
 14 34 4 -20.11 0.00
 14 34 5 2.57 0.00
 14 34 6 4.42 0.00
 14 34 7 0.63 0.00
 14 34 8 -6.11 0.00
 14 34 9 4.97 0.00
 14 34 10 14.79 0.00
 14 36 0 19.42 0.00
 14 36 1 -6.14 0.00
 14 36 2 -4.74 0.00
 14 36 3 -6.10 0.00
 14 36 4 9.70 0.00
 14 36 5 0.21 0.00
 14 36 6 -1.99 0.00
 14 36 7 -6.13 0.00
 14 36 8 0.90 0.00
 14 36 9 10.98 0.00
 14 38 0 18.68 0.00
 14 38 1 1.67 0.00
 14 38 2 3.62 0.00
 14 38 3 3.52 0.00
 14 38 4 -0.45 0.00
 14 38 5 -0.48 0.00
 14 38 6 2.66 0.00
 14 38 7 -0.70 0.00
 14 40 0 17.62 0.00
 14 40 1 -1.30 0.00
 14 40 2 -8.97 0.00
 14 40 3 -6.90 0.00
 14 40 4 -5.59 0.00
 14 40 5 -0.56 0.00
 14 42 0 -5.94 0.00
 14 42 1 9.48 0.00
 14 42 2 -2.76 0.00
 15 1 0 1.04 0.00
 15 1 1 -5.84 0.00
 15 1 2 -3.10 0.00
 15 1 3 -12.42 0.00
 15 1 4 -0.44 0.00
 15 1 5 7.15 0.00
 15 1 6 -10.54 0.00
 15 1 7 -9.34 0.00
 15 1 8 3.11 0.00
 15 1 9 1.28 0.00
 15 1 10 15.60 0.00
 15 1 11 -6.21 0.00
 15 1 12 -4.09 0.00
 15 1 13 -6.23 0.00
 15 1 14 -13.91 0.00
 15 1 15 -7.62 0.00
 15 1 16 -0.08 0.00
 15 3 0 -2.67 0.00
 15 3 1 -0.37 0.00
 15 3 2 0.40 0.00
 15 3 3 7.74 0.00
 15 3 4 2.66 0.00
 15 3 5 0.41 0.00
 15 3 6 -1.76 0.00
 15 3 7 0.67 0.00
 15 3 8 -1.25 0.00
 15 3 9 7.65 0.00
 15 3 10 0.28 0.00
 15 3 11 1.07 0.00
 15 3 12 8.35 0.00
 15 3 13 -4.83 0.00
 15 3 14 2.74 0.00
 15 3 15 8.10 0.00
 15 3 16 -4.28 0.00
 15 5 0 -6.49 0.00
 15 5 1 -10.05 0.00
 15 5 2 -0.06 0.00
 15 5 3 1.05 0.00
 15 5 4 -2.89 0.00
 15 5 5 -2.88 0.00
 15 5 6 2.20 0.00
 15 5 7 -3.55 0.00
 15 5 8 9.57 0.00
 15 5 9 -7.73 0.00
 15 5 10 3.44 0.00
 15 5 11 2.56 0.00
 15 5 12 9.68 0.00
 15 5 13 -2.38 0.00
 15 5 14 4.13 0.00
 15 5 15 -0.34 0.00
 15 5 16 -8.63 0.00
 15 7 0 4.35 0.00
 15 7 1 -1.70 0.00
 15 7 2 -4.12 0.00
 15 7 3 0.78 0.00
 15 7 4 11.87 0.00
 15 7 5 -0.97 0.00
 15 7 6 0.65 0.00
 15 7 7 -6.30 0.00
 15 7 8 1.29 0.00
 15 7 9 -0.08 0.00
 15 7 10 -10.08 0.00
 15 7 11 -4.02 0.00
 15 7 12 0.29 0.00
 15 7 13 5.78 0.00
 15 7 14 -0.54 0.00
 15 7 15 -4.27 0.00
 15 7 16 8.74 0.00
 15 9 0 -7.09 0.00
 15 9 1 -11.56 0.00
 15 9 2 2.73 0.00
 15 9 3 4.29 0.00
 15 9 4 -7.72 0.00
 15 9 5 -4.58 0.00
 15 9 6 2.83 0.00
 15 9 7 1.50 0.00
 15 9 8 1.87 0.00
 15 9 9 -1.38 0.00
 15 9 10 9.63 0.00
 15 9 11 5.59 0.00
 15 9 12 -0.78 0.00
 15 9 13 -4.31 0.00
 15 9 14 2.00 0.00
 15 9 15 3.21 0.00
 15 9 16 -0.92 0.00
 15 11 0 6.97 0.00
 15 11 1 7.75 0.00
 15 11 2 4.36 0.00
 15 11 3 -2.37 0.00
 15 11 4 10.32 0.00
 15 11 5 5.84 0.00
 15 11 6 -5.88 0.00
 15 11 7 -9.94 0.00
 15 11 8 10.66 0.00
 15 11 9 -2.81 0.00
 15 11 10 -6.60 0.00
 15 11 11 -10.16 0.00
 15 11 12 1.96 0.00
 15 11 13 -1.34 0.00
 15 11 14 -5.61 0.00
 15 11 15 1.30 0.00
 15 11 16 0.82 0.00
 15 13 0 6.56 0.00
 15 13 1 0.47 0.00
 15 13 2 12.75 0.00
 15 13 3 0.54 0.00
 15 13 4 -7.19 0.00
 15 13 5 0.65 0.00
 15 13 6 5.31 0.00
 15 13 7 2.31 0.00
 15 13 8 -1.32 0.00
 15 13 9 0.30 0.00
 15 13 10 1.21 0.00
 15 13 11 -5.63 0.00
 15 13 12 1.35 0.00
 15 13 13 5.98 0.00
 15 13 14 1.42 0.00
 15 13 15 1.23 0.00
 15 13 16 -2.49 0.00
 15 15 0 -3.39 0.00
 15 15 1 3.38 0.00
 15 15 2 4.03 0.00
 15 15 3 -4.72 0.00
 15 15 4 -8.38 0.00
 15 15 5 0.80 0.00
 15 15 6 -5.12 0.00
 15 15 7 6.25 0.00
 15 15 8 5.61 0.00
 15 15 9 -2.20 0.00
 15 15 10 12.11 0.00
 15 15 11 5.13 0.00
 15 15 12 3.63 0.00
 15 15 13 -15.49 0.00
 15 15 14 14.60 0.00
 15 15 15 -2.16 0.00
 15 17 0 5.75 0.00
 15 17 1 1.14 0.00
 15 17 2 -1.32 0.00
 15 17 3 -2.65 0.00
 15 17 4 8.00 0.00
 15 17 5 11.19 0.00
 15 17 6 -13.39 0.00
 15 17 7 -9.27 0.00
 15 17 8 6.23 0.00
 15 17 9 4.58 0.00
 15 17 10 -10.21 0.00
 15 17 11 -10.40 0.00
 15 17 12 0.60 0.00
 15 17 13 -0.25 0.00
 15 17 14 -6.90 0.00
 15 17 15 2.87 0.00
 15 19 0 -7.58 0.00
 15 19 1 -1.26 0.00
 15 19 2 -1.77 0.00
 15 19 3 1.53 0.00
 15 19 4 -14.69 0.00
 15 19 5 -3.48 0.00
 15 19 6 4.96 0.00
 15 19 7 4.76 0.00
 15 19 8 -2.12 0.00
 15 19 9 -2.61 0.00
 15 19 10 6.25 0.00
 15 19 11 1.42 0.00
 15 19 12 9.11 0.00
 15 19 13 -8.31 0.00
 15 19 14 0.90 0.00
 15 19 15 1.34 0.00
 15 21 0 -2.38 0.00
 15 21 1 -2.20 0.00
 15 21 2 0.19 0.00
 15 21 3 0.53 0.00
 15 21 4 2.23 0.00
 15 21 5 6.42 0.00
 15 21 6 -2.85 0.00
 15 21 7 -1.51 0.00
 15 21 8 -2.01 0.00
 15 21 9 5.49 0.00
 15 21 10 -5.11 0.00
 15 21 11 -0.19 0.00
 15 21 12 -1.61 0.00
 15 21 13 -6.13 0.00
 15 21 14 3.66 0.00
 15 23 0 -0.26 0.00
 15 23 1 2.37 0.00
 15 23 2 3.56 0.00
 15 23 3 -0.37 0.00
 15 23 4 2.96 0.00
 15 23 5 -0.91 0.00
 15 23 6 -7.02 0.00
 15 23 7 -3.55 0.00
 15 23 8 3.56 0.00
 15 23 9 -3.17 0.00
 15 23 10 2.15 0.00
 15 23 11 -4.53 0.00
 15 23 12 0.09 0.00
 15 23 13 4.72 0.00
 15 23 14 -10.98 0.00
 15 25 0 -11.02 0.00
 15 25 1 2.80 0.00
 15 25 2 -2.72 0.00
 15 25 3 6.80 0.00
 15 25 4 1.00 0.00
 15 25 5 2.78 0.00
 15 25 6 6.13 0.00
 15 25 7 2.08 0.00
 15 25 8 -1.02 0.00
 15 25 9 -0.89 0.00
 15 25 10 -0.78 0.00
 15 25 11 1.89 0.00
 15 25 12 -5.24 0.00
 15 25 13 -11.42 0.00
 15 27 0 1.51 0.00
 15 27 1 2.41 0.00
 15 27 2 2.24 0.00
 15 27 3 -0.69 0.00
 15 27 4 1.81 0.00
 15 27 5 -0.23 0.00
 15 27 6 -2.85 0.00
 15 27 7 -4.61 0.00
 15 27 8 -10.41 0.00
 15 27 9 -2.67 0.00
 15 27 10 4.95 0.00
 15 27 11 5.98 0.00
 15 27 12 2.59 0.00
 15 29 0 4.33 0.00
 15 29 1 -5.88 0.00
 15 29 2 -0.91 0.00
 15 29 3 -4.56 0.00
 15 29 4 -1.65 0.00
 15 29 5 -5.49 0.00
 15 29 6 5.11 0.00
 15 29 7 -5.47 0.00
 15 29 8 3.43 0.00
 15 29 9 5.64 0.00
 15 29 10 0.83 0.00
 15 29 11 -4.27 0.00
 15 31 0 -8.68 0.00
 15 31 1 -0.64 0.00
 15 31 2 -4.09 0.00
 15 31 3 4.80 0.00
 15 31 4 5.08 0.00
 15 31 5 -1.40 0.00
 15 31 6 3.27 0.00
 15 31 7 4.42 0.00
 15 31 8 4.71 0.00
 15 31 9 -0.81 0.00
 15 31 10 -4.28 0.00
 15 33 0 5.29 0.00
 15 33 1 -0.16 0.00
 15 33 2 -2.47 0.00
 15 33 3 -1.95 0.00
 15 33 4 5.15 0.00
 15 33 5 -2.08 0.00
 15 33 6 6.11 0.00
 15 33 7 -11.98 0.00
 15 33 8 5.15 0.00
 15 33 9 2.92 0.00
 15 35 0 -2.91 0.00
 15 35 1 -4.37 0.00
 15 35 2 1.59 0.00
 15 35 3 3.66 0.00
 15 35 4 -12.82 0.00
 15 35 5 -3.67 0.00
 15 35 6 5.31 0.00
 15 35 7 -1.36 0.00
 15 35 8 1.26 0.00
 15 37 0 -6.00 0.00
 15 37 1 -23.38 0.00
 15 37 2 1.03 0.00
 15 37 3 17.91 0.00
 15 37 4 -1.27 0.00
 15 37 5 4.69 0.00
 15 37 6 -0.11 0.00
 15 37 7 -2.46 0.00
 15 39 0 -2.28 0.00
 15 39 1 1.43 0.00
 15 39 2 -3.18 0.00
 15 39 3 -1.06 0.00
 15 39 4 6.02 0.00
 15 39 5 -7.97 0.00
 15 41 0 -3.42 0.00
 15 41 1 -11.27 0.00
 15 41 2 -6.32 0.00
 16 0 0 26.56 0.00
 16 0 2 -5.22 0.00
 16 0 4 9.81 0.00
 16 0 6 -13.34 0.00
 16 0 8 10.18 0.00
 16 0 10 -9.56 0.00
 16 0 12 -5.14 0.00
 16 0 14 0.30 0.00
 16 2 0 -17.72 0.00
 16 2 1 1.65 0.00
 16 2 2 0.64 0.00
 16 2 3 1.76 0.00
 16 2 4 -8.89 0.00
 16 2 5 1.10 0.00
 16 2 6 -1.95 0.00
 16 2 7 -1.28 0.00
 16 2 8 -8.82 0.00
 16 2 9 9.29 0.00
 16 2 10 3.79 0.00
 16 2 11 -11.63 0.00
 16 2 12 4.85 0.00
 16 2 13 -1.29 0.00
 16 2 14 -3.20 0.00
 16 2 15 22.55 0.00
 16 2 16 11.77 0.00
 16 4 0 2.74 0.00
 16 4 1 7.65 0.00
 16 4 2 2.72 0.00
 16 4 3 -8.00 0.00
 16 4 4 -7.63 0.00
 16 4 5 -2.69 0.00
 16 4 6 7.85 0.00
 16 4 7 -1.86 0.00
 16 4 8 -4.35 0.00
 16 4 9 15.80 0.00
 16 4 10 -2.64 0.00
 16 4 11 3.06 0.00
 16 4 12 3.77 0.00
 16 4 13 -1.67 0.00
 16 4 14 3.65 0.00
 16 4 15 -5.70 0.00
 16 4 16 0.79 0.00
 16 6 0 2.51 0.00
 16 6 1 0.95 0.00
 16 6 2 12.77 0.00
 16 6 3 1.26 0.00
 16 6 4 2.00 0.00
 16 6 5 -0.32 0.00
 16 6 6 -5.39 0.00
 16 6 7 -1.18 0.00
 16 6 8 1.74 0.00
 16 6 9 1.34 0.00
 16 6 10 -5.62 0.00
 16 6 11 4.34 0.00
 16 6 12 -5.75 0.00
 16 6 13 -6.38 0.00
 16 6 14 -4.19 0.00
 16 6 15 1.73 0.00
 16 6 16 9.61 0.00
 16 8 0 -7.08 0.00
 16 8 1 4.27 0.00
 16 8 2 -4.10 0.00
 16 8 3 -3.28 0.00
 16 8 4 -10.08 0.00
 16 8 5 2.06 0.00
 16 8 6 8.46 0.00
 16 8 7 0.06 0.00
 16 8 8 -5.65 0.00
 16 8 9 0.76 0.00
 16 8 10 3.63 0.00
 16 8 11 3.01 0.00
 16 8 12 5.32 0.00
 16 8 13 -1.14 0.00
 16 8 14 2.77 0.00
 16 8 15 2.08 0.00
 16 8 16 3.74 0.00
 16 10 0 -1.62 0.00
 16 10 1 -2.34 0.00
 16 10 2 -4.40 0.00
 16 10 3 3.78 0.00
 16 10 4 6.18 0.00
 16 10 5 -3.11 0.00
 16 10 6 -8.90 0.00
 16 10 7 0.96 0.00
 16 10 8 0.73 0.00
 16 10 9 4.82 0.00
 16 10 10 -4.64 0.00
 16 10 11 0.40 0.00
 16 10 12 -8.80 0.00
 16 10 13 2.25 0.00
 16 10 14 -2.61 0.00
 16 10 15 3.61 0.00
 16 12 0 -0.21 0.00
 16 12 1 -0.46 0.00
 16 12 2 -0.73 0.00
 16 12 3 3.02 0.00
 16 12 4 -8.02 0.00
 16 12 5 6.00 0.00
 16 12 6 7.92 0.00
 16 12 7 -3.88 0.00
 16 12 8 -4.56 0.00
 16 12 9 0.41 0.00
 16 12 10 5.68 0.00
 16 12 11 -6.71 0.00
 16 12 12 -0.19 0.00
 16 12 13 -4.71 0.00
 16 12 14 1.25 0.00
 16 12 15 -7.32 0.00
 16 14 0 -9.19 0.00
 16 14 1 5.64 0.00
 16 14 2 -11.81 0.00
 16 14 3 -14.53 0.00
 16 14 4 -1.05 0.00
 16 14 5 2.71 0.00
 16 14 6 -7.36 0.00
 16 14 7 1.84 0.00
 16 14 8 0.37 0.00
 16 14 9 -11.31 0.00
 16 14 10 1.36 0.00
 16 14 11 4.14 0.00
 16 14 12 5.73 0.00
 16 14 13 3.72 0.00
 16 14 14 6.92 0.00
 16 14 15 5.79 0.00
 16 16 0 -5.35 0.00
 16 16 1 -5.04 0.00
 16 16 2 2.84 0.00
 16 16 3 5.55 0.00
 16 16 4 6.86 0.00
 16 16 5 -2.53 0.00
 16 16 6 1.28 0.00
 16 16 7 1.12 0.00
 16 16 8 1.99 0.00
 16 16 9 -0.64 0.00
 16 16 10 -5.82 0.00
 16 16 11 -2.11 0.00
 16 16 12 -2.53 0.00
 16 16 13 -3.07 0.00
 16 16 14 0.05 0.00
 16 16 15 -10.13 0.00
 16 18 0 -9.70 0.00
 16 18 1 4.30 0.00
 16 18 2 2.22 0.00
 16 18 3 -2.02 0.00
 16 18 4 0.21 0.00
 16 18 5 -3.09 0.00
 16 18 6 0.42 0.00
 16 18 7 -3.95 0.00
 16 18 8 0.52 0.00
 16 18 9 7.00 0.00
 16 18 10 0.44 0.00
 16 18 11 -6.59 0.00
 16 18 12 6.38 0.00
 16 18 13 0.94 0.00
 16 18 14 0.24 0.00
 16 20 0 2.16 0.00
 16 20 1 -3.00 0.00
 16 20 2 2.71 0.00
 16 20 3 2.26 0.00
 16 20 4 -4.83 0.00
 16 20 5 -3.59 0.00
 16 20 6 3.90 0.00
 16 20 7 -6.58 0.00
 16 20 8 -3.11 0.00
 16 20 9 1.74 0.00
 16 20 10 -3.71 0.00
 16 20 11 -7.09 0.00
 16 20 12 2.39 0.00
 16 20 13 7.19 0.00
 16 20 14 2.33 0.00
 16 22 0 -3.37 0.00
 16 22 1 -7.90 0.00
 16 22 2 4.75 0.00
 16 22 3 6.83 0.00
 16 22 4 7.29 0.00
 16 22 5 -1.07 0.00
 16 22 6 6.04 0.00
 16 22 7 -8.47 0.00
 16 22 8 1.93 0.00
 16 22 9 3.11 0.00
 16 22 10 -1.41 0.00
 16 22 11 1.11 0.00
 16 22 12 -2.22 0.00
 16 22 13 -4.96 0.00
 16 24 0 -0.74 0.00
 16 24 1 6.74 0.00
 16 24 2 2.21 0.00
 16 24 3 -5.82 0.00
 16 24 4 -3.27 0.00
 16 24 5 3.54 0.00
 16 24 6 3.57 0.00
 16 24 7 -1.33 0.00
 16 24 8 -1.29 0.00
 16 24 9 0.08 0.00
 16 24 10 5.59 0.00
 16 24 11 6.84 0.00
 16 24 12 2.80 0.00
 16 24 13 2.82 0.00
 16 26 0 -3.27 0.00
 16 26 1 0.28 0.00
 16 26 2 0.27 0.00
 16 26 3 4.55 0.00
 16 26 4 4.01 0.00
 16 26 5 -1.34 0.00
 16 26 6 -1.72 0.00
 16 26 7 2.91 0.00
 16 26 8 4.12 0.00
 16 26 9 -18.61 0.00
 16 26 10 5.38 0.00
 16 26 11 0.39 0.00
 16 26 12 -1.77 0.00
 16 28 0 3.13 0.00
 16 28 1 -0.76 0.00
 16 28 2 -4.48 0.00
 16 28 3 2.59 0.00
 16 28 4 4.63 0.00
 16 28 5 2.36 0.00
 16 28 6 5.71 0.00
 16 28 7 -2.83 0.00
 16 28 8 7.44 0.00
 16 28 9 9.20 0.00
 16 28 10 7.45 0.00
 16 28 11 9.46 0.00
 16 30 0 -16.58 0.00
 16 30 1 0.64 0.00
 16 30 2 7.28 0.00
 16 30 3 -16.18 0.00
 16 30 4 -3.00 0.00
 16 30 5 -1.36 0.00
 16 30 6 2.20 0.00
 16 30 7 5.54 0.00
 16 30 8 13.38 0.00
 16 30 9 -3.10 0.00
 16 30 10 0.37 0.00
 16 32 0 -0.97 0.00
 16 32 1 -5.49 0.00
 16 32 2 -4.07 0.00
 16 32 3 4.72 0.00
 16 32 4 4.60 0.00
 16 32 5 1.90 0.00
 16 32 6 1.53 0.00
 16 32 7 0.93 0.00
 16 32 8 -0.27 0.00
 16 32 9 11.07 0.00
 16 34 0 -8.13 0.00
 16 34 1 2.63 0.00
 16 34 2 1.31 0.00
 16 34 3 -0.95 0.00
 16 34 4 -5.09 0.00
 16 34 5 -10.12 0.00
 16 34 6 -0.23 0.00
 16 34 7 1.75 0.00
 16 34 8 -9.39 0.00
 16 36 0 9.82 0.00
 16 36 1 6.99 0.00
 16 36 2 0.09 0.00
 16 36 3 -10.87 0.00
 16 36 4 -8.51 0.00
 16 36 5 1.61 0.00
 16 36 6 11.59 0.00
 16 38 0 14.52 0.00
 16 38 1 -1.50 0.00
 16 38 2 3.53 0.00
 16 38 3 2.60 0.00
 16 38 4 7.19 0.00
 16 38 5 2.06 0.00
 16 40 0 16.84 0.00
 16 40 1 2.66 0.00
 16 40 2 -3.24 0.00
 17 1 0 -3.08 0.00
 17 1 1 6.29 0.00
 17 1 2 0.65 0.00
 17 1 3 10.09 0.00
 17 1 4 -4.21 0.00
 17 1 5 0.65 0.00
 17 1 6 -3.56 0.00
 17 1 7 -3.68 0.00
 17 1 8 -0.47 0.00
 17 1 9 -6.84 0.00
 17 1 10 6.07 0.00
 17 1 11 -2.41 0.00
 17 1 12 -2.82 0.00
 17 1 13 -7.27 0.00
 17 1 14 -11.64 0.00
 17 1 15 -2.96 0.00
 17 3 0 7.59 0.00
 17 3 1 -9.14 0.00
 17 3 2 -7.12 0.00
 17 3 3 -12.87 0.00
 17 3 4 11.89 0.00
 17 3 5 4.13 0.00
 17 3 6 -7.11 0.00
 17 3 7 -2.92 0.00
 17 3 8 3.77 0.00
 17 3 9 6.82 0.00
 17 3 10 -1.67 0.00
 17 3 11 -2.39 0.00
 17 3 12 10.62 0.00
 17 3 13 -1.89 0.00
 17 3 14 6.01 0.00
 17 3 15 8.81 0.00
 17 5 0 -3.91 0.00
 17 5 1 5.07 0.00
 17 5 2 -6.87 0.00
 17 5 3 1.45 0.00
 17 5 4 3.70 0.00
 17 5 5 7.38 0.00
 17 5 6 -5.09 0.00
 17 5 7 -8.49 0.00
 17 5 8 4.79 0.00
 17 5 9 -4.61 0.00
 17 5 10 -2.98 0.00
 17 5 11 -6.46 0.00
 17 5 12 6.41 0.00
 17 5 13 -0.47 0.00
 17 5 14 5.49 0.00
 17 5 15 -7.02 0.00
 17 7 0 -13.27 0.00
 17 7 1 -9.40 0.00
 17 7 2 10.08 0.00
 17 7 3 -5.67 0.00
 17 7 4 -1.27 0.00
 17 7 5 -2.87 0.00
 17 7 6 6.06 0.00
 17 7 7 11.04 0.00
 17 7 8 5.02 0.00
 17 7 9 -7.06 0.00
 17 7 10 1.07 0.00
 17 7 11 5.37 0.00
 17 7 12 -1.12 0.00
 17 7 13 1.95 0.00
 17 7 14 -2.43 0.00
 17 7 15 3.20 0.00
 17 9 0 -5.90 0.00
 17 9 1 -2.58 0.00
 17 9 2 -1.34 0.00
 17 9 3 5.64 0.00
 17 9 4 1.67 0.00
 17 9 5 3.24 0.00
 17 9 6 -7.84 0.00
 17 9 7 -7.27 0.00
 17 9 8 1.83 0.00
 17 9 9 3.32 0.00
 17 9 10 -7.23 0.00
 17 9 11 -9.15 0.00
 17 9 12 11.98 0.00
 17 9 13 3.69 0.00
 17 9 14 -2.58 0.00
 17 9 15 0.46 0.00
 17 11 0 5.36 0.00
 17 11 1 2.21 0.00
 17 11 2 1.54 0.00
 17 11 3 1.29 0.00
 17 11 4 -1.13 0.00
 17 11 5 1.51 0.00
 17 11 6 7.99 0.00
 17 11 7 3.37 0.00
 17 11 8 1.67 0.00
 17 11 9 -3.36 0.00
 17 11 10 0.16 0.00
 17 11 11 0.57 0.00
 17 11 12 -0.41 0.00
 17 11 13 -5.43 0.00
 17 11 14 -1.40 0.00
 17 11 15 -0.47 0.00
 17 13 0 7.87 0.00
 17 13 1 -7.37 0.00
 17 13 2 7.48 0.00
 17 13 3 2.23 0.00
 17 13 4 -6.19 0.00
 17 13 5 0.95 0.00
 17 13 6 -4.45 0.00
 17 13 7 -4.38 0.00
 17 13 8 11.12 0.00
 17 13 9 -3.64 0.00
 17 13 10 -2.62 0.00
 17 13 11 -0.49 0.00
 17 13 12 -1.55 0.00
 17 13 13 -1.39 0.00
 17 13 14 -1.95 0.00
 17 13 15 7.76 0.00
 17 15 0 4.74 0.00
 17 15 1 7.20 0.00
 17 15 2 -5.47 0.00
 17 15 3 4.92 0.00
 17 15 4 -1.78 0.00
 17 15 5 5.75 0.00
 17 15 6 -3.65 0.00
 17 15 7 1.41 0.00
 17 15 8 1.34 0.00
 17 15 9 0.48 0.00
 17 15 10 5.93 0.00
 17 15 11 -5.20 0.00
 17 15 12 12.90 0.00
 17 15 13 1.56 0.00
 17 15 14 5.86 0.00
 17 17 0 -5.83 0.00
 17 17 1 0.23 0.00
 17 17 2 3.31 0.00
 17 17 3 -7.31 0.00
 17 17 4 -8.52 0.00
 17 17 5 -0.07 0.00
 17 17 6 -3.15 0.00
 17 17 7 -1.46 0.00
 17 17 8 1.79 0.00
 17 17 9 -1.87 0.00
 17 17 10 0.66 0.00
 17 17 11 5.90 0.00
 17 17 12 -5.16 0.00
 17 17 13 -4.20 0.00
 17 17 14 -5.57 0.00
 17 19 0 -3.08 0.00
 17 19 1 2.61 0.00
 17 19 2 -3.09 0.00
 17 19 3 6.34 0.00
 17 19 4 -1.66 0.00
 17 19 5 4.20 0.00
 17 19 6 -6.70 0.00
 17 19 7 -7.67 0.00
 17 19 8 7.16 0.00
 17 19 9 5.41 0.00
 17 19 10 -4.29 0.00
 17 19 11 -9.32 0.00
 17 19 12 10.99 0.00
 17 19 13 -6.82 0.00
 17 21 0 -3.50 0.00
 17 21 1 -1.97 0.00
 17 21 2 -1.62 0.00
 17 21 3 -3.85 0.00
 17 21 4 -7.61 0.00
 17 21 5 5.03 0.00
 17 21 6 2.62 0.00
 17 21 7 5.18 0.00
 17 21 8 -4.15 0.00
 17 21 9 -1.46 0.00
 17 21 10 6.26 0.00
 17 21 11 1.15 0.00
 17 21 12 -2.99 0.00
 17 21 13 -10.72 0.00
 17 23 0 -0.71 0.00
 17 23 1 -1.43 0.00
 17 23 2 3.58 0.00
 17 23 3 9.64 0.00
 17 23 4 4.12 0.00
 17 23 5 -0.60 0.00
 17 23 6 3.02 0.00
 17 23 7 -0.46 0.00
 17 23 8 -2.50 0.00
 17 23 9 -4.47 0.00
 17 23 10 4.19 0.00
 17 23 11 6.61 0.00
 17 23 12 -5.43 0.00
 17 25 0 6.56 0.00
 17 25 1 3.49 0.00
 17 25 2 -9.44 0.00
 17 25 3 0.16 0.00
 17 25 4 4.44 0.00
 17 25 5 -1.65 0.00
 17 25 6 2.18 0.00
 17 25 7 -2.09 0.00
 17 25 8 -1.55 0.00
 17 25 9 -0.76 0.00
 17 25 10 -5.02 0.00
 17 25 11 -7.47 0.00
 17 25 12 1.30 0.00
 17 27 0 -11.01 0.00
 17 27 1 -0.04 0.00
 17 27 2 3.59 0.00
 17 27 3 -0.05 0.00
 17 27 4 -3.68 0.00
 17 27 5 3.46 0.00
 17 27 6 7.21 0.00
 17 27 7 0.20 0.00
 17 27 8 -5.40 0.00
 17 27 9 1.34 0.00
 17 27 10 8.38 0.00
 17 27 11 -1.47 0.00
 17 29 0 7.48 0.00
 17 29 1 4.65 0.00
 17 29 2 3.52 0.00
 17 29 3 -4.52 0.00
 17 29 4 4.56 0.00
 17 29 5 -0.93 0.00
 17 29 6 -8.13 0.00
 17 29 7 -10.09 0.00
 17 29 8 3.80 0.00
 17 29 9 -3.50 0.00
 17 31 0 -6.69 0.00
 17 31 1 7.66 0.00
 17 31 2 -13.06 0.00
 17 31 3 -4.90 0.00
 17 31 4 2.33 0.00
 17 31 5 -5.90 0.00
 17 31 6 11.16 0.00
 17 31 7 -2.66 0.00
 17 31 8 14.08 0.00
 17 33 0 -3.79 0.00
 17 33 1 -1.69 0.00
 17 33 2 12.60 0.00
 17 33 3 6.56 0.00
 17 33 4 -0.08 0.00
 17 33 5 0.74 0.00
 17 33 6 0.62 0.00
 17 33 7 1.74 0.00
 17 35 0 2.04 0.00
 17 35 1 -2.84 0.00
 17 35 2 -6.10 0.00
 17 35 3 -6.54 0.00
 17 35 4 -0.37 0.00
 17 35 5 8.06 0.00
 17 35 6 2.75 0.00
 17 37 0 -7.78 0.00
 17 37 1 -15.24 0.00
 17 37 2 -1.74 0.00
 17 37 3 17.83 0.00
 17 37 4 1.07 0.00
 17 37 5 4.96 0.00
 17 39 0 -8.25 0.00
 17 39 1 -10.37 0.00
 18 0 0 6.25 0.00
 18 0 2 3.11 0.00
 18 0 4 2.37 0.00
 18 0 6 2.19 0.00
 18 0 8 -18.91 0.00
 18 0 10 -7.15 0.00
 18 0 12 -5.73 0.00
 18 0 14 -16.72 0.00
 18 2 0 1.48 0.00
 18 2 1 -0.43 0.00
 18 2 2 -7.89 0.00
 18 2 3 -0.32 0.00
 18 2 4 -1.92 0.00
 18 2 5 -1.26 0.00
 18 2 6 -13.16 0.00
 18 2 7 9.72 0.00
 18 2 8 13.44 0.00
 18 2 9 9.60 0.00
 18 2 10 -5.16 0.00
 18 2 11 -5.70 0.00
 18 2 12 10.18 0.00
 18 2 13 -1.32 0.00
 18 2 14 1.83 0.00
 18 4 0 -4.40 0.00
 18 4 1 7.97 0.00
 18 4 2 2.65 0.00
 18 4 3 -3.40 0.00
 18 4 4 2.00 0.00
 18 4 5 1.33 0.00
 18 4 6 4.48 0.00
 18 4 7 -8.46 0.00
 18 4 8 -10.87 0.00
 18 4 9 5.54 0.00
 18 4 10 -3.93 0.00
 18 4 11 -5.45 0.00
 18 4 12 -3.98 0.00
 18 4 13 0.17 0.00
 18 4 14 -0.12 0.00
 18 6 0 4.75 0.00
 18 6 1 -3.41 0.00
 18 6 2 9.60 0.00
 18 6 3 -5.04 0.00
 18 6 4 -6.83 0.00
 18 6 5 0.95 0.00
 18 6 6 4.67 0.00
 18 6 7 -0.47 0.00
 18 6 8 -4.45 0.00
 18 6 9 15.37 0.00
 18 6 10 4.15 0.00
 18 6 11 1.16 0.00
 18 6 12 4.48 0.00
 18 6 13 -4.09 0.00
 18 6 14 3.32 0.00
 18 8 0 -12.99 0.00
 18 8 1 -0.36 0.00
 18 8 2 -2.87 0.00
 18 8 3 10.14 0.00
 18 8 4 4.09 0.00
 18 8 5 2.02 0.00
 18 8 6 -2.67 0.00
 18 8 7 1.23 0.00
 18 8 8 -0.82 0.00
 18 8 9 -3.94 0.00
 18 8 10 -3.55 0.00
 18 8 11 0.50 0.00
 18 8 12 -0.73 0.00
 18 8 13 -9.98 0.00
 18 8 14 -5.16 0.00
 18 10 0 12.07 0.00
 18 10 1 -0.99 0.00
 18 10 2 0.75 0.00
 18 10 3 -4.27 0.00
 18 10 4 -8.31 0.00
 18 10 5 3.52 0.00
 18 10 6 7.13 0.00
 18 10 7 -4.97 0.00
 18 10 8 -8.13 0.00
 18 10 9 5.08 0.00
 18 10 10 1.82 0.00
 18 10 11 -3.14 0.00
 18 10 12 -8.06 0.00
 18 10 13 3.26 0.00
 18 10 14 -1.24 0.00
 18 12 0 -4.17 0.00
 18 12 1 1.70 0.00
 18 12 2 -7.20 0.00
 18 12 3 4.82 0.00
 18 12 4 7.12 0.00
 18 12 5 -5.23 0.00
 18 12 6 -10.46 0.00
 18 12 7 3.86 0.00
 18 12 8 8.71 0.00
 18 12 9 -2.44 0.00
 18 12 10 -4.44 0.00
 18 12 11 2.32 0.00
 18 12 12 -2.93 0.00
 18 12 13 1.91 0.00
 18 12 14 2.86 0.00
 18 14 0 -6.65 0.00
 18 14 1 -0.77 0.00
 18 14 2 -0.05 0.00
 18 14 3 3.48 0.00
 18 14 4 -4.43 0.00
 18 14 5 1.72 0.00
 18 14 6 3.58 0.00
 18 14 7 0.68 0.00
 18 14 8 0.12 0.00
 18 14 9 -14.70 0.00
 18 14 10 4.74 0.00
 18 14 11 -3.78 0.00
 18 14 12 8.51 0.00
 18 14 13 -0.47 0.00
 18 14 14 5.81 0.00
 18 16 0 8.72 0.00
 18 16 1 -1.07 0.00
 18 16 2 8.20 0.00
 18 16 3 -6.82 0.00
 18 16 4 -1.25 0.00
 18 16 5 0.19 0.00
 18 16 6 1.83 0.00
 18 16 7 -4.69 0.00
 18 16 8 -10.82 0.00
 18 16 9 15.28 0.00
 18 16 10 0.98 0.00
 18 16 11 -5.51 0.00
 18 16 12 -5.04 0.00
 18 16 13 9.23 0.00
 18 18 0 -12.06 0.00
 18 18 1 1.64 0.00
 18 18 2 -2.96 0.00
 18 18 3 7.11 0.00
 18 18 4 5.58 0.00
 18 18 5 -9.49 0.00
 18 18 6 2.05 0.00
 18 18 7 1.64 0.00
 18 18 8 11.30 0.00
 18 18 9 -11.04 0.00
 18 18 10 -3.64 0.00
 18 18 11 -3.32 0.00
 18 18 12 3.38 0.00
 18 18 13 2.02 0.00
 18 20 0 0.00 0.00
 18 20 1 -3.38 0.00
 18 20 2 5.31 0.00
 18 20 3 1.83 0.00
 18 20 4 -6.36 0.00
 18 20 5 -3.19 0.00
 18 20 6 5.05 0.00
 18 20 7 -7.03 0.00
 18 20 8 -6.54 0.00
 18 20 9 7.24 0.00
 18 20 10 -0.78 0.00
 18 20 11 -0.73 0.00
 18 20 12 5.59 0.00
 18 20 13 1.85 0.00
 18 22 0 1.22 0.00
 18 22 1 3.18 0.00
 18 22 2 1.81 0.00
 18 22 3 -4.86 0.00
 18 22 4 12.24 0.00
 18 22 5 5.90 0.00
 18 22 6 6.54 0.00
 18 22 7 -11.96 0.00
 18 22 8 -3.49 0.00
 18 22 9 5.70 0.00
 18 22 10 -2.03 0.00
 18 22 11 -3.26 0.00
 18 22 12 -3.22 0.00
 18 24 0 -2.84 0.00
 18 24 1 -3.31 0.00
 18 24 2 -9.01 0.00
 18 24 3 6.82 0.00
 18 24 4 6.46 0.00
 18 24 5 -4.46 0.00
 18 24 6 -10.39 0.00
 18 24 7 2.96 0.00
 18 24 8 3.50 0.00
 18 24 9 -4.17 0.00
 18 24 10 5.55 0.00
 18 24 11 1.45 0.00
 18 26 0 2.42 0.00
 18 26 1 -0.53 0.00
 18 26 2 1.01 0.00
 18 26 3 2.66 0.00
 18 26 4 -0.65 0.00
 18 26 5 -1.90 0.00
 18 26 6 12.42 0.00
 18 26 7 -1.80 0.00
 18 26 8 1.41 0.00
 18 26 9 -1.57 0.00
 18 26 10 3.33 0.00
 18 28 0 -6.81 0.00
 18 28 1 3.81 0.00
 18 28 2 -0.37 0.00
 18 28 3 -2.63 0.00
 18 28 4 -0.05 0.00
 18 28 5 1.11 0.00
 18 28 6 3.01 0.00
 18 28 7 4.19 0.00
 18 28 8 -0.20 0.00
 18 28 9 -13.25 0.00
 18 30 0 -4.84 0.00
 18 30 1 -3.01 0.00
 18 30 2 -3.71 0.00
 18 30 3 -9.83 0.00
 18 30 4 10.92 0.00
 18 30 5 -5.56 0.00
 18 30 6 -6.04 0.00
 18 30 7 10.59 0.00
 18 32 0 -9.35 0.00
 18 32 1 5.12 0.00
 18 32 2 -1.30 0.00
 18 32 3 -7.20 0.00
 18 32 4 -5.33 0.00
 18 32 5 -2.22 0.00
 18 32 6 10.57 0.00
 18 34 0 -3.24 0.00
 18 34 1 -6.58 0.00
 18 34 2 -5.77 0.00
 18 34 3 2.72 0.00
 18 34 4 -5.28 0.00
 18 34 5 2.62 0.00
 18 36 0 0.21 0.00
 18 36 1 -2.63 0.00
 18 36 2 -5.05 0.00
 18 36 3 -3.33 0.00
 18 36 4 12.68 0.00
 19 1 0 4.64 0.00
 19 1 1 -7.90 0.00
 19 1 2 -1.97 0.00
 19 1 3 -5.27 0.00
 19 1 4 4.45 0.00
 19 1 5 -3.95 0.00
 19 1 6 -9.00 0.00
 19 1 7 1.30 0.00
 19 1 8 -3.27 0.00
 19 1 9 9.53 0.00
 19 1 10 -5.11 0.00
 19 1 11 -0.08 0.00
 19 1 12 3.27 0.00
 19 1 13 -0.67 0.00
 19 1 14 -9.74 0.00
 19 3 0 -14.40 0.00
 19 3 1 6.31 0.00
 19 3 2 8.09 0.00
 19 3 3 -1.99 0.00
 19 3 4 -2.53 0.00
 19 3 5 3.46 0.00
 19 3 6 -6.60 0.00
 19 3 7 -3.55 0.00
 19 3 8 0.71 0.00
 19 3 9 -11.76 0.00
 19 3 10 -4.95 0.00
 19 3 11 -5.25 0.00
 19 3 12 7.48 0.00
 19 3 13 -4.52 0.00
 19 3 14 14.04 0.00
 19 5 0 -1.21 0.00
 19 5 1 -8.80 0.00
 19 5 2 2.00 0.00
 19 5 3 -3.69 0.00
 19 5 4 -0.60 0.00
 19 5 5 2.13 0.00
 19 5 6 -4.82 0.00
 19 5 7 -3.52 0.00
 19 5 8 -1.60 0.00
 19 5 9 3.10 0.00
 19 5 10 1.86 0.00
 19 5 11 0.44 0.00
 19 5 12 10.00 0.00
 19 5 13 1.89 0.00
 19 5 14 -2.77 0.00
 19 7 0 -7.85 0.00
 19 7 1 0.67 0.00
 19 7 2 -3.19 0.00
 19 7 3 3.73 0.00
 19 7 4 1.20 0.00
 19 7 5 0.58 0.00
 19 7 6 -2.03 0.00
 19 7 7 10.28 0.00
 19 7 8 0.24 0.00
 19 7 9 -0.30 0.00
 19 7 10 -3.59 0.00
 19 7 11 -6.65 0.00
 19 7 12 1.99 0.00
 19 7 13 -5.68 0.00
 19 7 14 -1.03 0.00
 19 9 0 3.96 0.00
 19 9 1 -1.29 0.00
 19 9 2 -2.46 0.00
 19 9 3 -8.31 0.00
 19 9 4 1.59 0.00
 19 9 5 1.25 0.00
 19 9 6 -3.50 0.00
 19 9 7 4.94 0.00
 19 9 8 0.42 0.00
 19 9 9 -2.55 0.00
 19 9 10 0.74 0.00
 19 9 11 6.68 0.00
 19 9 12 4.54 0.00
 19 9 13 8.12 0.00
 19 9 14 8.18 0.00
 19 11 0 -4.24 0.00
 19 11 1 -5.68 0.00
 19 11 2 2.88 0.00
 19 11 3 6.16 0.00
 19 11 4 -6.16 0.00
 19 11 5 2.39 0.00
 19 11 6 -3.01 0.00
 19 11 7 0.20 0.00
 19 11 8 -2.87 0.00
 19 11 9 -1.06 0.00
 19 11 10 -2.34 0.00
 19 11 11 -7.33 0.00
 19 11 12 1.14 0.00
 19 11 13 -2.44 0.00
 19 11 14 -5.23 0.00
 19 13 0 12.99 0.00
 19 13 1 13.56 0.00
 19 13 2 -5.15 0.00
 19 13 3 -7.86 0.00
 19 13 4 0.17 0.00
 19 13 5 3.82 0.00
 19 13 6 7.49 0.00
 19 13 7 -2.39 0.00
 19 13 8 8.29 0.00
 19 13 9 -1.89 0.00
 19 13 10 -0.65 0.00
 19 13 11 1.14 0.00
 19 13 12 0.09 0.00
 19 13 13 -0.44 0.00
 19 15 0 -0.92 0.00
 19 15 1 -5.58 0.00
 19 15 2 -2.74 0.00
 19 15 3 2.30 0.00
 19 15 4 -2.94 0.00
 19 15 5 3.51 0.00
 19 15 6 -9.86 0.00
 19 15 7 -1.14 0.00
 19 15 8 3.55 0.00
 19 15 9 -5.74 0.00
 19 15 10 4.87 0.00
 19 15 11 6.59 0.00
 19 15 12 8.91 0.00
 19 15 13 0.77 0.00
 19 17 0 -11.32 0.00
 19 17 1 -3.60 0.00
 19 17 2 6.14 0.00
 19 17 3 3.64 0.00
 19 17 4 -5.15 0.00
 19 17 5 -7.36 0.00
 19 17 6 2.87 0.00
 19 17 7 -4.27 0.00
 19 17 8 -2.51 0.00
 19 17 9 8.10 0.00
 19 17 10 -2.79 0.00
 19 17 11 -7.64 0.00
 19 17 12 -3.14 0.00
 19 17 13 1.53 0.00
 19 19 0 0.74 0.00
 19 19 1 2.64 0.00
 19 19 2 -6.60 0.00
 19 19 3 -1.72 0.00
 19 19 4 -2.40 0.00
 19 19 5 -2.16 0.00
 19 19 6 -0.34 0.00
 19 19 7 2.68 0.00
 19 19 8 2.37 0.00
 19 19 9 -6.35 0.00
 19 19 10 6.18 0.00
 19 19 11 -0.17 0.00
 19 19 12 -2.36 0.00
 19 21 0 3.95 0.00
 19 21 1 -5.03 0.00
 19 21 2 -5.04 0.00
 19 21 3 4.73 0.00
 19 21 4 -1.41 0.00
 19 21 5 2.53 0.00
 19 21 6 -1.22 0.00
 19 21 7 3.97 0.00
 19 21 8 0.24 0.00
 19 21 9 5.23 0.00
 19 21 10 -2.03 0.00
 19 21 11 -0.38 0.00
 19 21 12 1.73 0.00
 19 23 0 3.09 0.00
 19 23 1 -2.15 0.00
 19 23 2 6.26 0.00
 19 23 3 1.69 0.00
 19 23 4 0.94 0.00
 19 23 5 -1.95 0.00
 19 23 6 4.91 0.00
 19 23 7 -2.10 0.00
 19 23 8 3.52 0.00
 19 23 9 0.76 0.00
 19 23 10 -1.76 0.00
 19 23 11 1.62 0.00
 19 25 0 -4.85 0.00
 19 25 1 1.72 0.00
 19 25 2 -0.08 0.00
 19 25 3 -4.57 0.00
 19 25 4 -3.62 0.00
 19 25 5 3.54 0.00
 19 25 6 9.12 0.00
 19 25 7 0.77 0.00
 19 25 8 -4.08 0.00
 19 25 9 -5.20 0.00
 19 25 10 1.48 0.00
 19 27 0 9.62 0.00
 19 27 1 2.12 0.00
 19 27 2 -3.24 0.00
 19 27 3 -0.52 0.00
 19 27 4 2.00 0.00
 19 27 5 0.53 0.00
 19 27 6 2.63 0.00
 19 27 7 -0.75 0.00
 19 27 8 -8.21 0.00
 19 27 9 0.03 0.00
 19 29 0 -2.09 0.00
 19 29 1 -0.73 0.00
 19 29 2 -4.43 0.00
 19 29 3 2.30 0.00
 19 29 4 2.02 0.00
 19 29 5 -5.51 0.00
 19 29 6 -0.61 0.00
 19 29 7 -9.83 0.00
 19 31 0 -3.06 0.00
 19 31 1 10.28 0.00
 19 31 2 1.70 0.00
 19 31 3 -5.11 0.00
 19 31 4 6.38 0.00
 19 31 5 -2.19 0.00
 19 31 6 -8.12 0.00
 19 33 0 -3.19 0.00
 19 33 1 2.50 0.00
 19 33 2 -0.43 0.00
 19 33 3 2.91 0.00
 19 33 4 1.12 0.00
 19 33 5 4.89 0.00
 19 35 0 -7.24 0.00
 19 35 1 -1.52 0.00
 19 35 2 5.25 0.00
 19 35 3 3.42 0.00
 20 0 0 3.81 0.00
 20 0 2 5.26 0.00
 20 0 4 1.58 0.00
 20 0 6 -15.15 0.00
 20 0 8 2.14 0.00
 20 0 10 -10.46 0.00
 20 0 12 -6.06 0.00
 20 2 0 1.07 0.00
 20 2 1 -2.17 0.00
 20 2 2 -7.85 0.00
 20 2 3 -0.70 0.00
 20 2 4 1.11 0.00
 20 2 5 5.86 0.00
 20 2 6 5.53 0.00
 20 2 7 -10.70 0.00
 20 2 8 0.07 0.00
 20 2 9 6.88 0.00
 20 2 10 -2.38 0.00
 20 2 11 -6.26 0.00
 20 2 12 0.71 0.00
 20 2 13 11.51 0.00
 20 4 0 -3.39 0.00
 20 4 1 0.12 0.00
 20 4 2 -3.69 0.00
 20 4 3 0.76 0.00
 20 4 4 -3.55 0.00
 20 4 5 0.36 0.00
 20 4 6 -1.23 0.00
 20 4 7 6.22 0.00
 20 4 8 3.35 0.00
 20 4 9 3.49 0.00
 20 4 10 1.34 0.00
 20 4 11 -2.57 0.00
 20 4 12 11.46 0.00
 20 4 13 0.10 0.00
 20 6 0 1.41 0.00
 20 6 1 -3.87 0.00
 20 6 2 4.71 0.00
 20 6 3 4.37 0.00
 20 6 4 7.44 0.00
 20 6 5 -1.31 0.00
 20 6 6 -1.13 0.00
 20 6 7 -1.75 0.00
 20 6 8 -4.25 0.00
 20 6 9 0.08 0.00
 20 6 10 -4.12 0.00
 20 6 11 -0.25 0.00
 20 6 12 -3.79 0.00
 20 6 13 -2.93 0.00
 20 8 0 9.95 0.00
 20 8 1 -2.90 0.00
 20 8 2 -9.33 0.00
 20 8 3 4.90 0.00
 20 8 4 -5.58 0.00
 20 8 5 3.47 0.00
 20 8 6 8.11 0.00
 20 8 7 -3.66 0.00
 20 8 8 -5.83 0.00
 20 8 9 7.37 0.00
 20 8 10 8.91 0.00
 20 8 11 -10.54 0.00
 20 8 12 5.16 0.00
 20 8 13 -0.03 0.00
 20 10 0 -9.26 0.00
 20 10 1 3.36 0.00
 20 10 2 -1.75 0.00
 20 10 3 7.42 0.00
 20 10 4 10.28 0.00
 20 10 5 -5.98 0.00
 20 10 6 -7.99 0.00
 20 10 7 4.58 0.00
 20 10 8 0.71 0.00
 20 10 9 -5.29 0.00
 20 10 10 -12.89 0.00
 20 10 11 3.21 0.00
 20 10 12 -7.49 0.00
 20 10 13 0.93 0.00
 20 12 0 7.06 0.00
 20 12 1 -0.31 0.00
 20 12 2 -4.77 0.00
 20 12 3 0.72 0.00
 20 12 4 -0.79 0.00
 20 12 5 -2.12 0.00
 20 12 6 4.08 0.00
 20 12 7 -4.02 0.00
 20 12 8 -1.92 0.00
 20 12 9 -1.65 0.00
 20 12 10 6.30 0.00
 20 12 11 -0.87 0.00
 20 12 12 1.10 0.00
 20 12 13 1.47 0.00
 20 14 0 1.42 0.00
 20 14 1 3.61 0.00
 20 14 2 -2.47 0.00
 20 14 3 -1.13 0.00
 20 14 4 1.69 0.00
 20 14 5 5.15 0.00
 20 14 6 -2.22 0.00
 20 14 7 -1.93 0.00
 20 14 8 5.37 0.00
 20 14 9 2.26 0.00
 20 14 10 -3.36 0.00
 20 14 11 -4.11 0.00
 20 14 12 -1.02 0.00
 20 16 0 -7.43 0.00
 20 16 1 6.48 0.00
 20 16 2 12.82 0.00
 20 16 3 -2.31 0.00
 20 16 4 -3.18 0.00
 20 16 5 -1.86 0.00
 20 16 6 3.34 0.00
 20 16 7 3.86 0.00
 20 16 8 -5.83 0.00
 20 16 9 -16.15 0.00
 20 16 10 1.58 0.00
 20 16 11 7.73 0.00
 20 16 12 -1.00 0.00
 20 18 0 2.67 0.00
 20 18 1 -6.80 0.00
 20 18 2 -3.42 0.00
 20 18 3 1.72 0.00
 20 18 4 -1.63 0.00
 20 18 5 -1.09 0.00
 20 18 6 7.72 0.00
 20 18 7 -7.30 0.00
 20 18 8 -0.58 0.00
 20 18 9 14.68 0.00
 20 18 10 3.42 0.00
 20 18 11 -8.92 0.00
 20 18 12 -1.39 0.00
 20 20 0 -2.15 0.00
 20 20 1 -1.34 0.00
 20 20 2 -5.72 0.00
 20 20 3 4.13 0.00
 20 20 4 3.55 0.00
 20 20 5 -4.48 0.00
 20 20 6 -1.87 0.00
 20 20 7 -2.17 0.00
 20 20 8 1.85 0.00
 20 20 9 -6.94 0.00
 20 20 10 1.83 0.00
 20 20 11 0.81 0.00
 20 22 0 -0.97 0.00
 20 22 1 -5.36 0.00
 20 22 2 2.81 0.00
 20 22 3 2.49 0.00
 20 22 4 7.64 0.00
 20 22 5 -1.97 0.00
 20 22 6 -0.56 0.00
 20 22 7 0.43 0.00
 20 22 8 -3.99 0.00
 20 22 9 -1.88 0.00
 20 22 10 -1.90 0.00
 20 24 0 -5.99 0.00
 20 24 1 7.94 0.00
 20 24 2 -1.67 0.00
 20 24 3 -0.76 0.00
 20 24 4 -2.90 0.00
 20 24 5 1.25 0.00
 20 24 6 5.35 0.00
 20 24 7 0.22 0.00
 20 24 8 -0.51 0.00
 20 24 9 9.81 0.00
 20 26 0 3.27 0.00
 20 26 1 -4.75 0.00
 20 26 2 -2.40 0.00
 20 26 3 -1.85 0.00
 20 26 4 4.04 0.00
 20 26 5 2.62 0.00
 20 26 6 -4.38 0.00
 20 26 7 -3.28 0.00
 20 26 8 -1.10 0.00
 20 28 0 -6.43 0.00
 20 28 1 -1.06 0.00
 20 28 2 -0.82 0.00
 20 28 3 -0.88 0.00
 20 28 4 7.03 0.00
 20 28 5 -1.75 0.00
 20 28 6 7.47 0.00
 20 28 7 -3.32 0.00
 20 30 0 1.57 0.00
 20 30 1 -5.06 0.00
 20 30 2 2.32 0.00
 20 30 3 -4.87 0.00
 20 30 4 -5.86 0.00
 20 30 5 0.05 0.00
 20 32 0 0.63 0.00
 20 32 1 -6.69 0.00
 20 32 2 -7.52 0.00
 20 32 3 -2.35 0.00
 20 32 4 3.56 0.00
 20 34 0 -13.94 0.00
 20 34 1 2.70 0.00
 20 34 2 -4.77 0.00
 21 1 0 -5.09 0.00
 21 1 1 8.09 0.00
 21 1 2 8.54 0.00
 21 1 3 -3.57 0.00
 21 1 4 -1.46 0.00
 21 1 5 6.55 0.00
 21 1 6 -11.17 0.00
 21 1 7 -5.12 0.00
 21 1 8 -3.44 0.00
 21 1 9 -0.20 0.00
 21 1 10 -9.83 0.00
 21 1 11 -0.23 0.00
 21 1 12 2.60 0.00
 21 3 0 -8.72 0.00
 21 3 1 -9.95 0.00
 21 3 2 7.92 0.00
 21 3 3 -4.04 0.00
 21 3 4 -4.76 0.00
 21 3 5 -6.85 0.00
 21 3 6 -4.24 0.00
 21 3 7 -4.77 0.00
 21 3 8 -5.85 0.00
 21 3 9 -4.34 0.00
 21 3 10 5.19 0.00
 21 3 11 -1.20 0.00
 21 3 12 12.19 0.00
 21 5 0 -3.95 0.00
 21 5 1 2.76 0.00
 21 5 2 -0.36 0.00
 21 5 3 4.70 0.00
 21 5 4 -4.36 0.00
 21 5 5 5.94 0.00
 21 5 6 -7.03 0.00
 21 5 7 3.07 0.00
 21 5 8 -7.58 0.00
 21 5 9 -4.42 0.00
 21 5 10 3.87 0.00
 21 5 11 -1.97 0.00
 21 5 12 3.90 0.00
 21 7 0 2.17 0.00
 21 7 1 -5.80 0.00
 21 7 2 -3.54 0.00
 21 7 3 -2.19 0.00
 21 7 4 4.09 0.00
 21 7 5 -0.83 0.00
 21 7 6 -6.16 0.00
 21 7 7 4.42 0.00
 21 7 8 0.11 0.00
 21 7 9 6.15 0.00
 21 7 10 1.34 0.00
 21 7 11 -0.52 0.00
 21 7 12 5.59 0.00
 21 9 0 -5.21 0.00
 21 9 1 -4.42 0.00
 21 9 2 2.05 0.00
 21 9 3 3.14 0.00
 21 9 4 -7.57 0.00
 21 9 5 -1.41 0.00
 21 9 6 -3.77 0.00
 21 9 7 7.15 0.00
 21 9 8 -1.52 0.00
 21 9 9 -0.01 0.00
 21 9 10 1.06 0.00
 21 9 11 -2.37 0.00
 21 9 12 -0.57 0.00
 21 11 0 11.51 0.00
 21 11 1 9.52 0.00
 21 11 2 -7.41 0.00
 21 11 3 -13.89 0.00
 21 11 4 5.01 0.00
 21 11 5 5.64 0.00
 21 11 6 -8.73 0.00
 21 11 7 -1.84 0.00
 21 11 8 2.10 0.00
 21 11 9 0.05 0.00
 21 11 10 -3.95 0.00
 21 11 11 3.58 0.00
 21 11 12 4.03 0.00
 21 13 0 -7.83 0.00
 21 13 1 -3.09 0.00
 21 13 2 1.04 0.00
 21 13 3 3.78 0.00
 21 13 4 -0.14 0.00
 21 13 5 1.59 0.00
 21 13 6 2.55 0.00
 21 13 7 -3.54 0.00
 21 13 8 1.86 0.00
 21 13 9 -0.81 0.00
 21 13 10 3.06 0.00
 21 13 11 -9.41 0.00
 21 13 12 -0.84 0.00
 21 15 0 4.58 0.00
 21 15 1 4.52 0.00
 21 15 2 0.76 0.00
 21 15 3 -3.85 0.00
 21 15 4 -5.25 0.00
 21 15 5 -4.72 0.00
 21 15 6 8.71 0.00
 21 15 7 1.56 0.00
 21 15 8 -2.24 0.00
 21 15 9 -3.76 0.00
 21 15 10 2.99 0.00
 21 15 11 5.78 0.00
 21 17 0 -1.07 0.00
 21 17 1 -0.53 0.00
 21 17 2 -5.12 0.00
 21 17 3 -4.79 0.00
 21 17 4 4.85 0.00
 21 17 5 -0.20 0.00
 21 17 6 -6.29 0.00
 21 17 7 -4.54 0.00
 21 17 8 -3.22 0.00
 21 17 9 1.99 0.00
 21 17 10 2.81 0.00
 21 17 11 2.52 0.00
 21 19 0 -6.78 0.00
 21 19 1 -7.15 0.00
 21 19 2 5.41 0.00
 21 19 3 3.12 0.00
 21 19 4 -4.60 0.00
 21 19 5 -8.69 0.00
 21 19 6 6.57 0.00
 21 19 7 1.84 0.00
 21 19 8 0.79 0.00
 21 19 9 -0.76 0.00
 21 19 10 -4.20 0.00
 21 21 0 3.19 0.00
 21 21 1 -1.14 0.00
 21 21 2 -4.10 0.00
 21 21 3 1.57 0.00
 21 21 4 0.10 0.00
 21 21 5 4.96 0.00
 21 21 6 1.20 0.00
 21 21 7 10.04 0.00
 21 21 8 0.50 0.00
 21 21 9 2.72 0.00
 21 21 10 -0.83 0.00
 21 23 0 11.82 0.00
 21 23 1 4.67 0.00
 21 23 2 -0.41 0.00
 21 23 3 -5.52 0.00
 21 23 4 7.77 0.00
 21 23 5 -3.26 0.00
 21 23 6 -1.71 0.00
 21 23 7 -0.41 0.00
 21 23 8 -1.02 0.00
 21 23 9 1.27 0.00
 21 25 0 1.57 0.00
 21 25 1 -4.08 0.00
 21 25 2 1.89 0.00
 21 25 3 3.07 0.00
 21 25 4 -5.89 0.00
 21 25 5 -4.14 0.00
 21 25 6 9.61 0.00
 21 25 7 -0.54 0.00
 21 25 8 2.55 0.00
 21 27 0 -3.62 0.00
 21 27 1 1.78 0.00
 21 27 2 -1.18 0.00
 21 27 3 -2.12 0.00
 21 27 4 1.91 0.00
 21 27 5 8.39 0.00
 21 27 6 -6.68 0.00
 21 29 0 6.86 0.00
 21 29 1 1.80 0.00
 21 29 2 -4.77 0.00
 21 29 3 -3.70 0.00
 21 29 4 0.30 0.00
 21 31 0 -16.18 0.00
 21 31 1 -1.09 0.00
 21 31 2 1.46 0.00
 21 31 3 16.95 0.00
 21 31 4 2.66 0.00
 22 0 0 6.92 0.00
 22 0 2 3.81 0.00
 22 0 4 4.43 0.00
 22 0 6 -1.82 0.00
 22 0 8 4.15 0.00
 22 0 10 -16.68 0.00
 22 2 0 -5.63 0.00
 22 2 1 -0.04 0.00
 22 2 2 -5.44 0.00
 22 2 3 -1.17 0.00
 22 2 4 -2.09 0.00
 22 2 5 7.89 0.00
 22 2 6 -3.10 0.00
 22 2 7 -2.54 0.00
 22 2 8 3.54 0.00
 22 2 9 -2.62 0.00
 22 2 10 4.43 0.00
 22 2 11 2.59 0.00
 22 4 0 0.75 0.00
 22 4 1 -2.31 0.00
 22 4 2 -8.73 0.00
 22 4 3 3.75 0.00
 22 4 4 4.55 0.00
 22 4 5 -1.64 0.00
 22 4 6 0.38 0.00
 22 4 7 -4.55 0.00
 22 4 8 0.69 0.00
 22 4 9 2.07 0.00
 22 4 10 4.07 0.00
 22 4 11 -5.77 0.00
 22 6 0 8.85 0.00
 22 6 1 -2.28 0.00
 22 6 2 -3.28 0.00
 22 6 3 4.11 0.00
 22 6 4 0.02 0.00
 22 6 5 -5.48 0.00
 22 6 6 -1.55 0.00
 22 6 7 2.77 0.00
 22 6 8 -0.14 0.00
 22 6 9 -2.09 0.00
 22 6 10 1.53 0.00
 22 6 11 -1.53 0.00
 22 8 0 -7.69 0.00
 22 8 1 5.28 0.00
 22 8 2 -1.03 0.00
 22 8 3 6.83 0.00
 22 8 4 -1.75 0.00
 22 8 5 4.10 0.00
 22 8 6 3.17 0.00
 22 8 7 0.59 0.00
 22 8 8 -2.81 0.00
 22 8 9 -0.86 0.00
 22 8 10 -2.87 0.00
 22 8 11 0.56 0.00
 22 10 0 12.34 0.00
 22 10 1 -2.73 0.00
 22 10 2 -7.53 0.00
 22 10 3 -2.09 0.00
 22 10 4 3.48 0.00
 22 10 5 -4.59 0.00
 22 10 6 -5.64 0.00
 22 10 7 -6.93 0.00
 22 10 8 -3.09 0.00
 22 10 9 -3.11 0.00
 22 10 10 -4.32 0.00
 22 10 11 -4.60 0.00
 22 12 0 -12.48 0.00
 22 12 1 9.26 0.00
 22 12 2 -2.41 0.00
 22 12 3 -9.40 0.00
 22 12 4 3.50 0.00
 22 12 5 2.18 0.00
 22 12 6 4.71 0.00
 22 12 7 3.80 0.00
 22 12 8 0.48 0.00
 22 12 9 3.92 0.00
 22 12 10 0.82 0.00
 22 12 11 0.98 0.00
 22 14 0 2.33 0.00
 22 14 1 9.35 0.00
 22 14 2 4.84 0.00
 22 14 3 1.62 0.00
 22 14 4 -5.24 0.00
 22 14 5 3.36 0.00
 22 14 6 -0.59 0.00
 22 14 7 -4.29 0.00
 22 14 8 -2.28 0.00
 22 14 9 -4.43 0.00
 22 14 10 -0.49 0.00
 22 14 11 3.96 0.00
 22 16 0 17.62 0.00
 22 16 1 -20.02 0.00
 22 16 2 -9.77 0.00
 22 16 3 3.70 0.00
 22 16 4 11.08 0.00
 22 16 5 -3.04 0.00
 22 16 6 0.60 0.00
 22 16 7 -3.83 0.00
 22 16 8 -0.21 0.00
 22 16 9 4.97 0.00
 22 16 10 -0.49 0.00
 22 18 0 -11.26 0.00
 22 18 1 13.26 0.00
 22 18 2 1.06 0.00
 22 18 3 -2.28 0.00
 22 18 4 -6.96 0.00
 22 18 5 3.26 0.00
 22 18 6 -2.39 0.00
 22 18 7 1.45 0.00
 22 18 8 2.81 0.00
 22 18 9 -5.07 0.00
 22 18 10 6.34 0.00
 22 20 0 -1.94 0.00
 22 20 1 -3.39 0.00
 22 20 2 -3.25 0.00
 22 20 3 -1.91 0.00
 22 20 4 1.36 0.00
 22 20 5 -3.24 0.00
 22 20 6 0.96 0.00
 22 20 7 -0.17 0.00
 22 20 8 2.96 0.00
 22 20 9 1.47 0.00
 22 22 0 0.80 0.00
 22 22 1 -2.06 0.00
 22 22 2 3.42 0.00
 22 22 3 8.07 0.00
 22 22 4 -1.01 0.00
 22 22 5 0.18 0.00
 22 22 6 1.73 0.00
 22 22 7 -0.48 0.00
 22 22 8 -5.31 0.00
 22 24 0 -2.66 0.00
 22 24 1 -7.57 0.00
 22 24 2 -1.93 0.00
 22 24 3 1.27 0.00
 22 24 4 -5.15 0.00
 22 24 5 -0.68 0.00
 22 24 6 4.24 0.00
 22 24 7 6.31 0.00
 22 26 0 -3.61 0.00
 22 26 1 7.98 0.00
 22 26 2 1.65 0.00
 22 26 3 -1.48 0.00
 22 26 4 3.18 0.00
 22 26 5 1.83 0.00
 22 28 0 10.96 0.00
 22 28 1 -9.63 0.00
 22 28 2 4.02 0.00
 22 28 3 -9.89 0.00
 23 1 0 -3.40 0.00
 23 1 1 -4.03 0.00
 23 1 2 5.14 0.00
 23 1 3 -1.96 0.00
 23 1 4 -5.93 0.00
 23 1 5 -1.21 0.00
 23 1 6 -0.12 0.00
 23 1 7 3.25 0.00
 23 1 8 -3.88 0.00
 23 1 9 -0.84 0.00
 23 1 10 -7.08 0.00
 23 3 0 -4.86 0.00
 23 3 1 4.27 0.00
 23 3 2 5.38 0.00
 23 3 3 -1.38 0.00
 23 3 4 -0.93 0.00
 23 3 5 -0.52 0.00
 23 3 6 -12.62 0.00
 23 3 7 -10.19 0.00
 23 3 8 0.49 0.00
 23 3 9 -3.62 0.00
 23 3 10 8.54 0.00
 23 3 11 -14.33 0.00
 23 5 0 -4.68 0.00
 23 5 1 -4.36 0.00
 23 5 2 -4.92 0.00
 23 5 3 -0.59 0.00
 23 5 4 -3.34 0.00
 23 5 5 -1.86 0.00
 23 5 6 -1.32 0.00
 23 5 7 0.93 0.00
 23 5 8 -5.46 0.00
 23 5 9 3.81 0.00
 23 5 10 1.17 0.00
 23 5 11 -3.42 0.00
 23 7 0 -0.90 0.00
 23 7 1 0.61 0.00
 23 7 2 0.43 0.00
 23 7 3 3.76 0.00
 23 7 4 -0.25 0.00
 23 7 5 7.86 0.00
 23 7 6 -4.22 0.00
 23 7 7 7.95 0.00
 23 7 8 -0.22 0.00
 23 7 9 -2.20 0.00
 23 7 10 12.06 0.00
 23 7 11 3.50 0.00
 23 9 0 5.43 0.00
 23 9 1 -5.21 0.00
 23 9 2 -3.59 0.00
 23 9 3 -8.37 0.00
 23 9 4 2.05 0.00
 23 9 5 2.47 0.00
 23 9 6 -11.96 0.00
 23 9 7 -6.09 0.00
 23 9 8 0.70 0.00
 23 9 9 5.36 0.00
 23 9 10 -0.17 0.00
 23 11 0 -5.52 0.00
 23 11 1 -1.09 0.00
 23 11 2 3.69 0.00
 23 11 3 -1.01 0.00
 23 11 4 -5.43 0.00
 23 11 5 -2.96 0.00
 23 11 6 -0.79 0.00
 23 11 7 5.80 0.00
 23 11 8 3.91 0.00
 23 11 9 -3.12 0.00
 23 11 10 0.02 0.00
 23 13 0 3.86 0.00
 23 13 1 6.03 0.00
 23 13 2 0.26 0.00
 23 13 3 1.18 0.00
 23 13 4 0.23 0.00
 23 13 5 -0.35 0.00
 23 13 6 8.75 0.00
 23 13 7 -3.53 0.00
 23 13 8 -1.82 0.00
 23 13 9 0.11 0.00
 23 13 10 -2.11 0.00
 23 15 0 1.23 0.00
 23 15 1 1.83 0.00
 23 15 2 0.69 0.00
 23 15 3 -8.93 0.00
 23 15 4 -1.00 0.00
 23 15 5 -2.85 0.00
 23 15 6 -0.59 0.00
 23 15 7 -2.19 0.00
 23 15 8 2.42 0.00
 23 15 9 0.25 0.00
 23 15 10 1.93 0.00
 23 17 0 -3.42 0.00
 23 17 1 -0.45 0.00
 23 17 2 4.61 0.00
 23 17 3 3.05 0.00
 23 17 4 1.62 0.00
 23 17 5 -1.19 0.00
 23 17 6 5.63 0.00
 23 17 7 -1.36 0.00
 23 17 8 -2.50 0.00
 23 17 9 -5.53 0.00
 23 19 0 14.24 0.00
 23 19 1 -3.84 0.00
 23 19 2 -13.87 0.00
 23 19 3 -3.87 0.00
 23 19 4 5.31 0.00
 23 19 5 2.75 0.00
 23 19 6 -4.84 0.00
 23 19 7 -0.44 0.00
 23 19 8 -2.19 0.00
 23 21 0 -0.96 0.00
 23 21 1 3.55 0.00
 23 21 2 2.86 0.00
 23 21 3 4.84 0.00
 23 21 4 3.31 0.00
 23 21 5 -1.49 0.00
 23 21 6 8.40 0.00
 23 21 7 10.31 0.00
 23 23 0 2.62 0.00
 23 23 1 -3.87 0.00
 23 23 2 2.66 0.00
 23 23 3 -0.44 0.00
 23 23 4 -2.04 0.00
 23 23 5 -0.54 0.00
 23 23 6 -1.76 0.00
 23 25 0 3.66 0.00
 23 25 1 9.72 0.00
 23 25 2 -4.63 0.00
 23 25 3 -6.41 0.00
 23 25 4 9.43 0.00
 24 0 0 13.07 0.00
 24 0 2 -0.02 0.00
 24 0 4 -3.19 0.00
 24 0 6 4.85 0.00
 24 0 8 -9.20 0.00
 24 2 0 -3.26 0.00
 24 2 1 2.83 0.00
 24 2 2 -4.66 0.00
 24 2 3 1.77 0.00
 24 2 4 6.19 0.00
 24 2 5 -1.02 0.00
 24 2 6 -4.30 0.00
 24 2 7 -4.52 0.00
 24 2 8 8.60 0.00
 24 2 9 0.60 0.00
 24 4 0 -1.32 0.00
 24 4 1 6.19 0.00
 24 4 2 -4.39 0.00
 24 4 3 -5.85 0.00
 24 4 4 -5.45 0.00
 24 4 5 3.46 0.00
 24 4 6 -3.00 0.00
 24 4 7 2.84 0.00
 24 4 8 4.54 0.00
 24 4 9 -0.39 0.00
 24 4 10 7.51 0.00
 24 6 0 -0.09 0.00
 24 6 1 1.19 0.00
 24 6 2 1.55 0.00
 24 6 3 0.93 0.00
 24 6 4 0.26 0.00
 24 6 5 2.53 0.00
 24 6 6 1.89 0.00
 24 6 7 -11.74 0.00
 24 6 8 -6.43 0.00
 24 6 9 2.95 0.00
 24 6 10 -0.09 0.00
 24 8 0 -1.54 0.00
 24 8 1 0.95 0.00
 24 8 2 -1.53 0.00
 24 8 3 6.07 0.00
 24 8 4 0.68 0.00
 24 8 5 -6.98 0.00
 24 8 6 -6.90 0.00
 24 8 7 6.33 0.00
 24 8 8 -0.58 0.00
 24 8 9 -5.70 0.00
 24 10 0 -2.69 0.00
 24 10 1 10.58 0.00
 24 10 2 1.77 0.00
 24 10 3 -19.99 0.00
 24 10 4 -7.70 0.00
 24 10 5 5.02 0.00
 24 10 6 3.44 0.00
 24 10 7 -3.63 0.00
 24 10 8 -8.29 0.00
 24 10 9 6.52 0.00
 24 12 0 6.64 0.00
 24 12 1 0.56 0.00
 24 12 2 -8.11 0.00
 24 12 3 1.24 0.00
 24 12 4 7.15 0.00
 24 12 5 -4.55 0.00
 24 12 6 -3.44 0.00
 24 12 7 3.69 0.00
 24 12 8 2.15 0.00
 24 12 9 -7.55 0.00
 24 14 0 4.45 0.00
 24 14 1 -4.25 0.00
 24 14 2 1.69 0.00
 24 14 3 -5.95 0.00
 24 14 4 0.76 0.00
 24 14 5 0.50 0.00
 24 14 6 -3.40 0.00
 24 14 7 -0.87 0.00
 24 14 8 -2.23 0.00
 24 14 9 9.11 0.00
 24 16 0 -2.80 0.00
 24 16 1 8.23 0.00
 24 16 2 4.91 0.00
 24 16 3 -7.56 0.00
 24 16 4 -1.85 0.00
 24 16 5 7.43 0.00
 24 16 6 1.95 0.00
 24 16 7 -9.14 0.00
 24 16 8 2.66 0.00
 24 18 0 4.58 0.00
 24 18 1 -6.60 0.00
 24 18 2 -9.59 0.00
 24 18 3 5.75 0.00
 24 18 4 4.13 0.00
 24 18 5 -4.03 0.00
 24 18 6 -9.64 0.00
 24 18 7 -0.76 0.00
 24 20 0 -4.65 0.00
 24 20 1 -5.81 0.00
 24 20 2 2.89 0.00
 24 20 3 0.14 0.00
 24 20 4 -3.70 0.00
 24 20 5 -0.53 0.00
 24 20 6 -1.08 0.00
 24 22 0 6.06 0.00
 24 22 1 3.03 0.00
 24 22 2 -2.91 0.00
 24 22 3 1.75 0.00
 24 22 4 -2.24 0.00
 24 22 5 2.40 0.00
 24 24 0 -3.07 0.00
 24 24 1 -0.12 0.00
 24 24 2 -3.15 0.00
 24 24 3 2.56 0.00
 25 1 0 1.80 0.00
 25 1 1 -1.00 0.00
 25 1 2 -0.65 0.00
 25 1 3 2.41 0.00
 25 1 4 -1.03 0.00
 25 1 5 0.50 0.00
 25 1 6 1.29 0.00
 25 1 7 0.11 0.00
 25 1 8 0.28 0.00
 25 3 0 2.40 0.00
 25 3 1 -0.21 0.00
 25 3 2 -10.83 0.00
 25 3 3 -0.38 0.00
 25 3 4 -2.19 0.00
 25 3 5 -6.75 0.00
 25 3 6 0.96 0.00
 25 3 7 -8.52 0.00
 25 3 8 4.49 0.00
 25 5 0 -9.02 0.00
 25 5 1 4.48 0.00
 25 5 2 3.91 0.00
 25 5 3 0.63 0.00
 25 5 4 2.38 0.00
 25 5 5 4.23 0.00
 25 5 6 -4.69 0.00
 25 5 7 -1.25 0.00
 25 5 8 0.82 0.00
 25 7 0 1.71 0.00
 25 7 1 -4.81 0.00
 25 7 2 -5.01 0.00
 25 7 3 0.13 0.00
 25 7 4 -5.10 0.00
 25 7 5 2.26 0.00
 25 7 6 1.89 0.00
 25 7 7 3.81 0.00
 25 7 8 -2.95 0.00
 25 9 0 2.49 0.00
 25 9 1 3.21 0.00
 25 9 2 4.12 0.00
 25 9 3 -3.01 0.00
 25 9 4 -5.00 0.00
 25 9 5 -3.37 0.00
 25 9 6 -3.05 0.00
 25 9 7 -1.07 0.00
 25 9 8 5.42 0.00
 25 11 0 -1.57 0.00
 25 11 1 -9.99 0.00
 25 11 2 -3.27 0.00
 25 11 3 -0.47 0.00
 25 11 4 3.72 0.00
 25 11 5 3.26 0.00
 25 11 6 1.67 0.00
 25 11 7 -0.11 0.00
 25 11 8 1.46 0.00
 25 13 0 5.60 0.00
 25 13 1 5.69 0.00
 25 13 2 4.03 0.00
 25 13 3 -4.32 0.00
 25 13 4 -1.80 0.00
 25 13 5 -2.84 0.00
 25 13 6 -0.45 0.00
 25 13 7 -1.41 0.00
 25 15 0 5.39 0.00
 25 15 1 3.17 0.00
 25 15 2 -6.57 0.00
 25 15 3 -1.59 0.00
 25 15 4 8.45 0.00
 25 15 5 -0.86 0.00
 25 15 6 2.83 0.00
 25 15 7 -4.69 0.00
 25 17 0 -3.21 0.00
 25 17 1 -4.34 0.00
 25 17 2 6.28 0.00
 25 17 3 3.18 0.00
 25 17 4 -3.06 0.00
 25 17 5 1.33 0.00
 25 17 6 0.99 0.00
 25 19 0 1.93 0.00
 25 19 1 3.14 0.00
 25 19 2 -1.33 0.00
 25 19 3 5.03 0.00
 25 19 4 -1.79 0.00
 25 19 5 -3.35 0.00
 25 21 0 10.13 0.00
 25 21 1 -1.44 0.00
 25 21 2 -13.01 0.00
 25 21 3 -1.69 0.00
 26 0 0 6.54 0.00
 26 0 2 5.95 0.00
 26 0 4 4.40 0.00
 26 2 0 4.05 0.00
 26 2 1 2.75 0.00
 26 2 2 -4.92 0.00
 26 2 3 -4.37 0.00
 26 2 4 -2.46 0.00
 26 2 5 6.32 0.00
 26 2 6 5.69 0.00
 26 2 7 -1.24 0.00
 26 4 0 -3.37 0.00
 26 4 1 -0.16 0.00
 26 4 2 0.74 0.00
 26 4 3 1.30 0.00
 26 4 4 -3.95 0.00
 26 4 5 2.72 0.00
 26 4 6 -1.28 0.00
 26 4 7 -9.49 0.00
 26 6 0 -4.35 0.00
 26 6 1 13.59 0.00
 26 6 2 7.52 0.00
 26 6 3 -4.62 0.00
 26 6 4 -2.60 0.00
 26 6 5 -4.83 0.00
 26 6 6 -2.59 0.00
 26 6 7 7.59 0.00
 26 8 0 -4.41 0.00
 26 8 1 0.36 0.00
 26 8 2 -0.18 0.00
 26 8 3 -5.50 0.00
 26 8 4 -2.61 0.00
 26 8 5 7.88 0.00
 26 8 6 0.85 0.00
 26 8 7 -10.85 0.00
 26 10 0 4.04 0.00
 26 10 1 3.46 0.00
 26 10 2 -2.44 0.00
 26 10 3 -1.49 0.00
 26 10 4 2.49 0.00
 26 10 5 -14.76 0.00
 26 10 6 -5.25 0.00
 26 12 0 -1.43 0.00
 26 12 1 2.49 0.00
 26 12 2 4.84 0.00
 26 12 3 -8.33 0.00
 26 12 4 -1.45 0.00
 26 12 5 1.79 0.00
 26 12 6 -3.85 0.00
 26 14 0 6.02 0.00
 26 14 1 2.17 0.00
 26 14 2 -3.05 0.00
 26 14 3 -8.56 0.00
 26 14 4 6.44 0.00
 26 14 5 3.31 0.00
 26 16 0 0.10 0.00
 26 16 1 -3.42 0.00
 26 16 2 7.00 0.00
 26 16 3 -3.13 0.00
 26 16 4 -5.01 0.00
 26 18 0 -2.28 0.00
 26 18 1 4.61 0.00
 26 18 2 -2.10 0.00
 26 18 3 -8.69 0.00
 27 1 0 10.41 0.00
 27 1 1 -1.37 0.00
 27 1 2 -11.11 0.00
 27 1 3 0.28 0.00
 27 1 4 4.13 0.00
 27 3 0 -9.55 0.00
 27 3 1 3.98 0.00
 27 3 2 2.20 0.00
 27 3 3 0.81 0.00
 27 3 4 -2.82 0.00
 27 3 5 -4.84 0.00
 27 5 0 1.50 0.00
 27 5 1 -5.46 0.00
 27 5 2 -4.26 0.00
 27 5 3 1.31 0.00
 27 5 4 -9.99 0.00
 27 5 5 1.88 0.00
 27 7 0 9.51 0.00
 27 7 1 7.07 0.00
 27 7 2 -2.74 0.00
 27 7 3 2.02 0.00
 27 7 4 6.03 0.00
 27 7 5 -0.35 0.00
 27 9 0 -7.71 0.00
 27 9 1 -6.14 0.00
 27 9 2 -2.53 0.00
 27 9 3 -1.58 0.00
 27 9 4 -4.55 0.00
 27 11 0 12.13 0.00
 27 11 1 4.69 0.00
 27 11 2 -0.03 0.00
 27 11 3 -3.20 0.00
 27 11 4 2.92 0.00
 27 13 0 -2.34 0.00
 27 13 1 -7.25 0.00
 27 13 2 -1.21 0.00
 27 13 3 -5.72 0.00
 27 15 0 -3.65 0.00
 10 0 0 71.92 0.00
 12 0 0 84.56 0.00
 1 1 0 1.42 0.00
 0 2 0 -266.76 0.00
 1 3 0 -23.53 0.00
 0 4 0 331.31 0.00
 1 5 0 -39.29 0.00
 2 8 0 -58.61 0.00
 27 17 0 9.22 0.00
 27 19 0 -0.97 0.00
 26 20 0 7.36 0.00
 27 21 0 7.41 0.00
 0 22 0 -6.37 0.00
 26 22 0 -4.69 0.00
 1 23 0 3.42 0.00
 25 23 0 12.43 0.00
 27 23 0 -2.14 0.00
 0 24 0 28.70 0.00
 26 24 0 4.00 0.00
 1 25 0 9.22 0.00
 25 25 0 -0.45 0.00
 27 25 0 8.83 0.00
 0 26 0 -13.76 0.00
 24 26 0 8.63 0.00
 26 26 0 4.91 0.00
 23 27 0 15.83 0.00
 25 27 0 1.90 0.00
 27 27 0 -0.35 0.00
 0 28 0 8.70 0.00
 24 28 0 -9.43 0.00
 26 28 0 7.04 0.00
 23 29 0 -20.57 0.00
 25 29 0 -4.57 0.00
 27 29 0 -11.59 0.00
 22 30 0 -14.48 0.00
 24 30 0 6.91 0.00
 26 30 0 -9.21 0.00
 23 31 0 6.26 0.00
 25 31 0 -11.80 0.00
 22 32 0 4.09 0.00
 24 32 0 -2.44 0.00
 26 32 0 2.47 0.00
 21 33 0 11.63 0.00
 23 33 0 -11.73 0.00
 25 33 0 3.83 0.00
 22 34 0 -2.65 0.00
 24 34 0 -10.22 0.00
 21 35 0 -4.83 0.00
 23 35 0 3.57 0.00
 20 36 0 -3.68 0.00
 22 36 0 -6.99 0.00
 24 36 0 9.19 0.00
 19 37 0 1.88 0.00
 21 37 0 -8.86 0.00
 23 37 0 3.37 0.00
 0 38 0 -48.53 0.00
 18 38 0 -1.87 0.00
 20 38 0 3.77 0.00
 22 38 0 6.08 0.00
 19 39 0 -10.23 0.00
 21 39 0 5.83 0.00
 18 40 0 5.04 0.00
 20 40 0 3.10 0.00
 22 40 0 -3.75 0.00
 17 41 0 -12.38 0.00
 19 41 0 -4.01 0.00
 21 41 0 -5.99 0.00
 16 42 0 -2.37 0.00
 18 42 0 2.98 0.00
 20 42 0 -9.05 0.00
 15 43 0 7.10 0.00
 17 43 0 7.92 0.00
 19 43 0 -0.54 0.00
 14 44 0 -5.36 0.00
 16 44 0 7.07 0.00
 18 44 0 -0.86 0.00
 11 45 0 0.07 0.00
 13 45 0 4.59 0.00
 15 45 0 -0.78 0.00
 17 45 0 1.88 0.00
 10 46 0 -3.18 0.00
 12 46 0 7.52 0.00
 14 46 0 2.37 0.00
 16 46 0 6.71 0.00
 9 47 0 16.93 0.00
 11 47 0 7.24 0.00
 13 47 0 -2.80 0.00
 15 47 0 8.58 0.00
 6 48 0 -12.13 0.00
 8 48 0 -7.11 0.00
 10 48 0 -1.05 0.00
 12 48 0 8.26 0.00
 14 48 0 -1.14 0.00
 0 4 1 4.95 0.00
 27 15 1 -8.82 0.00
 27 17 1 11.03 0.00
 27 19 1 1.44 0.00
 26 20 1 -4.80 0.00
 27 21 1 -0.66 0.00
 0 22 1 15.14 0.00
 26 22 1 -8.10 0.00
 25 23 1 6.73 0.00
 27 23 1 -1.19 0.00
 0 24 1 4.67 0.00
 26 24 1 5.68 0.00
 25 25 1 -2.28 0.00
 27 25 1 -3.71 0.00
 24 26 1 -2.62 0.00
 26 26 1 5.92 0.00
 23 27 1 0.83 0.00
 25 27 1 -4.81 0.00
 27 27 1 4.57 0.00
 24 28 1 -7.60 0.00
 26 28 1 -5.93 0.00
 23 29 1 -9.27 0.00
 25 29 1 6.08 0.00
 27 29 1 -4.25 0.00
 22 30 1 -9.79 0.00
 24 30 1 6.03 0.00
 26 30 1 -4.10 0.00
 23 31 1 8.63 0.00
 25 31 1 0.46 0.00
 22 32 1 3.35 0.00
 24 32 1 -8.12 0.00
 26 32 1 5.72 0.00
 21 33 1 7.96 0.00
 23 33 1 -3.90 0.00
 25 33 1 -1.69 0.00
 22 34 1 -8.57 0.00
 24 34 1 4.41 0.00
 21 35 1 3.54 0.00
 23 35 1 6.46 0.00
 20 36 1 -3.55 0.00
 22 36 1 1.84 0.00
 24 36 1 -6.25 0.00
 19 37 1 1.54 0.00
 21 37 1 -1.64 0.00
 23 37 1 4.04 0.00
 18 38 1 6.89 0.00
 20 38 1 1.66 0.00
 22 38 1 1.00 0.00
 19 39 1 -9.36 0.00
 21 39 1 2.73 0.00
 18 40 1 3.85 0.00
 20 40 1 2.10 0.00
 17 41 1 -9.72 0.00
 19 41 1 -8.40 0.00
 21 41 1 -4.56 0.00
 16 42 1 6.90 0.00
 18 42 1 2.62 0.00
 20 42 1 -0.87 0.00
 15 43 1 3.92 0.00
 17 43 1 -6.63 0.00
 19 43 1 -1.81 0.00
 12 44 1 8.05 0.00
 14 44 1 4.25 0.00
 16 44 1 -0.49 0.00
 18 44 1 -1.46 0.00
 11 45 1 -10.18 0.00
 13 45 1 2.15 0.00
 15 45 1 4.12 0.00
 17 45 1 1.36 0.00
 10 46 1 -9.52 0.00
 12 46 1 3.17 0.00
 14 46 1 2.98 0.00
 16 46 1 1.10 0.00
 9 47 1 -1.38 0.00
 11 47 1 2.39 0.00
 13 47 1 -10.50 0.00
 15 47 1 -0.60 0.00
 6 48 1 6.03 0.00
 8 48 1 -3.04 0.00
 10 48 1 -2.04 0.00
 12 48 1 -10.43 0.00
 14 48 1 2.10 0.00
 27 15 2 4.40 0.00
 27 17 2 -7.00 0.00
 27 19 2 -7.34 0.00
 26 20 2 -5.87 0.00
 27 21 2 0.51 0.00
 26 22 2 7.62 0.00
 25 23 2 -5.15 0.00
 27 23 2 -7.76 0.00
 26 24 2 -6.82 0.00
 25 25 2 -3.31 0.00
 27 25 2 -2.31 0.00
 24 26 2 8.30 0.00
 26 26 2 1.51 0.00
 23 27 2 -8.40 0.00
 25 27 2 -4.10 0.00
 27 27 2 -5.73 0.00
 24 28 2 5.56 0.00
 26 28 2 4.24 0.00
 23 29 2 -3.86 0.00
 25 29 2 -7.46 0.00
 27 29 2 0.86 0.00
 22 30 2 2.94 0.00
 24 30 2 0.79 0.00
 26 30 2 3.57 0.00
 23 31 2 -0.60 0.00
 25 31 2 1.83 0.00
 22 32 2 0.36 0.00
 24 32 2 0.75 0.00
 21 33 2 -1.62 0.00
 23 33 2 4.08 0.00
 25 33 2 -1.12 0.00
 22 34 2 -4.71 0.00
 24 34 2 2.71 0.00
 21 35 2 -3.18 0.00
 23 35 2 -6.21 0.00
 20 36 2 6.71 0.00
 22 36 2 1.89 0.00
 24 36 2 1.92 0.00
 19 37 2 -1.50 0.00
 21 37 2 4.49 0.00
 23 37 2 0.53 0.00
 18 38 2 18.53 0.00
 20 38 2 1.86 0.00
 22 38 2 8.96 0.00
 17 39 2 10.79 0.00
 19 39 2 1.80 0.00
 21 39 2 -0.65 0.00
 18 40 2 -3.58 0.00
 20 40 2 0.45 0.00
 17 41 2 -4.27 0.00
 19 41 2 4.35 0.00
 21 41 2 0.39 0.00
 16 42 2 -6.36 0.00
 18 42 2 -3.04 0.00
 20 42 2 1.17 0.00
 15 43 2 3.56 0.00
 17 43 2 1.06 0.00
 19 43 2 -1.19 0.00
 12 44 2 14.33 0.00
 14 44 2 0.40 0.00
 16 44 2 -1.26 0.00
 18 44 2 -1.84 0.00
 11 45 2 3.30 0.00
 13 45 2 -4.89 0.00
 15 45 2 -1.29 0.00
 17 45 2 -0.36 0.00
 10 46 2 -0.39 0.00
 12 46 2 -13.80 0.00
 14 46 2 0.74 0.00
 16 46 2 -7.07 0.00
 9 47 2 -2.41 0.00
 11 47 2 -4.30 0.00
 13 47 2 5.71 0.00
 15 47 2 -2.66 0.00
 6 48 2 13.49 0.00
 8 48 2 12.08 0.00
 10 48 2 -2.04 0.00
 12 48 2 -8.03 0.00
 14 48 2 -3.68 0.00
 27 15 3 10.99 0.00
 27 17 3 -7.26 0.00
 27 19 3 3.47 0.00
 26 20 3 4.07 0.00
 27 21 3 3.35 0.00
 26 22 3 2.04 0.00
 25 23 3 -2.64 0.00
 27 23 3 -0.30 0.00
 26 24 3 1.60 0.00
 25 25 3 7.64 0.00
 27 25 3 4.29 0.00
 24 26 3 -1.48 0.00
 26 26 3 -8.92 0.00
 23 27 3 3.53 0.00
 25 27 3 -0.02 0.00
 27 27 3 -5.31 0.00
 24 28 3 -12.65 0.00
 26 28 3 -3.85 0.00
 23 29 3 6.90 0.00
 25 29 3 -8.11 0.00
 22 30 3 -1.79 0.00
 24 30 3 -1.67 0.00
 26 30 3 -3.71 0.00
 23 31 3 1.18 0.00
 25 31 3 7.03 0.00
 22 32 3 -3.43 0.00
 24 32 3 -7.03 0.00
 21 33 3 -6.68 0.00
 23 33 3 4.66 0.00
 25 33 3 2.17 0.00
 20 34 3 -6.69 0.00
 22 34 3 0.03 0.00
 24 34 3 0.72 0.00
 21 35 3 4.43 0.00
 23 35 3 3.28 0.00
 20 36 3 1.53 0.00
 22 36 3 -2.54 0.00
 19 37 3 12.14 0.00
 21 37 3 14.47 0.00
 23 37 3 2.20 0.00
 18 38 3 0.49 0.00
 20 38 3 4.58 0.00
 22 38 3 1.83 0.00
 17 39 3 4.43 0.00
 19 39 3 -1.24 0.00
 21 39 3 -0.65 0.00
 16 40 3 -3.09 0.00
 18 40 3 0.27 0.00
 20 40 3 -2.45 0.00
 15 41 3 3.99 0.00
 17 41 3 -0.07 0.00
 19 41 3 7.51 0.00
 14 42 3 5.61 0.00
 16 42 3 1.12 0.00
 18 42 3 0.27 0.00
 20 42 3 1.54 0.00
 13 43 3 7.84 0.00
 15 43 3 5.47 0.00
 17 43 3 7.48 0.00
 19 43 3 -0.96 0.00
 12 44 3 0.89 0.00
 14 44 3 -8.71 0.00
 16 44 3 -2.21 0.00
 18 44 3 -1.82 0.00
 11 45 3 5.50 0.00
 13 45 3 0.45 0.00
 15 45 3 -6.03 0.00
 17 45 3 2.18 0.00
 10 46 3 8.70 0.00
 12 46 3 -5.11 0.00
 14 46 3 -1.66 0.00
 16 46 3 -3.77 0.00
 7 47 3 3.95 0.00
 9 47 3 7.85 0.00
 11 47 3 0.25 0.00
 13 47 3 2.10 0.00
 15 47 3 3.04 0.00
 4 48 3 5.49 0.00
 6 48 3 0.01 0.00
 8 48 3 9.44 0.00
 10 48 3 0.72 0.00
 12 48 3 5.64 0.00
 14 48 3 1.32 0.00
 27 13 4 4.04 0.00
 27 15 4 0.51 0.00
 27 17 4 7.21 0.00
 26 18 4 6.15 0.00
 27 19 4 -2.16 0.00
 26 20 4 -6.84 0.00
 25 21 4 9.61 0.00
 27 21 4 -2.46 0.00
 26 22 4 3.58 0.00
 25 23 4 2.67 0.00
 27 23 4 5.18 0.00
 24 24 4 2.20 0.00
 26 24 4 -0.39 0.00
 25 25 4 -2.75 0.00
 27 25 4 -5.63 0.00
 24 26 4 -7.70 0.00
 26 26 4 3.90 0.00
 23 27 4 -10.82 0.00
 25 27 4 -4.56 0.00
 27 27 4 -2.98 0.00
 22 28 4 -1.28 0.00
 24 28 4 3.59 0.00
 26 28 4 -0.34 0.00
 23 29 4 7.90 0.00
 25 29 4 -0.59 0.00
 22 30 4 7.57 0.00
 24 30 4 5.89 0.00
 26 30 4 -0.54 0.00
 23 31 4 -2.53 0.00
 25 31 4 1.92 0.00
 22 32 4 -7.45 0.00
 24 32 4 -2.77 0.00
 21 33 4 2.92 0.00
 23 33 4 0.72 0.00
 20 34 4 0.57 0.00
 22 34 4 4.86 0.00
 24 34 4 -1.29 0.00
 19 35 4 1.16 0.00
 21 35 4 3.52 0.00
 23 35 4 2.09 0.00
 20 36 4 -0.56 0.00
 22 36 4 4.35 0.00
 19 37 4 3.27 0.00
 21 37 4 5.28 0.00
 23 37 4 2.74 0.00
 18 38 4 -18.91 0.00
 20 38 4 -0.31 0.00
 22 38 4 -5.61 0.00
 17 39 4 -3.73 0.00
 19 39 4 0.74 0.00
 21 39 4 -2.66 0.00
 16 40 4 -7.48 0.00
 18 40 4 4.34 0.00
 20 40 4 -2.99 0.00
 15 41 4 0.82 0.00
 17 41 4 6.55 0.00
 19 41 4 -2.02 0.00
 14 42 4 15.12 0.00
 16 42 4 1.67 0.00
 18 42 4 -5.86 0.00
 13 43 4 3.12 0.00
 15 43 4 -9.17 0.00
 17 43 4 -2.44 0.00
 19 43 4 5.28 0.00
 12 44 4 -8.96 0.00
 14 44 4 -1.24 0.00
 16 44 4 6.39 0.00
 18 44 4 0.33 0.00
 11 45 4 -3.38 0.00
 13 45 4 -2.60 0.00
 15 45 4 1.75 0.00
 17 45 4 -2.08 0.00
 8 46 4 -4.69 0.00
 10 46 4 -0.18 0.00
 12 46 4 8.43 0.00
 14 46 4 2.54 0.00
 16 46 4 1.33 0.00
 7 47 4 -7.87 0.00
 9 47 4 -4.02 0.00
 11 47 4 0.78 0.00
 13 47 4 0.78 0.00
 15 47 4 2.10 0.00
 0 48 4 -1.47 0.00
 2 48 4 -3.13 0.00
 4 48 4 2.37 0.00
 6 48 4 -1.80 0.00
 8 48 4 -0.96 0.00
 10 48 4 4.29 0.00
 12 48 4 7.59 0.00
 14 48 4 2.00 0.00
 27 1 5 5.29 0.00
 27 9 5 -9.80 0.00
 27 11 5 8.05 0.00
 27 13 5 -1.15 0.00
 27 15 5 -7.52 0.00
 26 16 5 -1.57 0.00
 27 17 5 8.91 0.00
 26 18 5 5.92 0.00
 27 19 5 -6.67 0.00
 26 20 5 0.16 0.00
 25 21 5 10.58 0.00
 27 21 5 9.42 0.00
 26 22 5 -1.18 0.00
 25 23 5 4.89 0.00
 27 23 5 0.10 0.00
 24 24 5 3.75 0.00
 26 24 5 3.41 0.00
 23 25 5 9.06 0.00
 25 25 5 -5.32 0.00
 27 25 5 2.01 0.00
 24 26 5 -2.90 0.00
 26 26 5 -0.93 0.00
 23 27 5 -8.61 0.00
 25 27 5 3.53 0.00
 22 28 5 6.80 0.00
 24 28 5 9.18 0.00
 26 28 5 1.66 0.00
 21 29 5 -10.89 0.00
 23 29 5 -8.42 0.00
 25 29 5 -1.56 0.00
 22 30 5 7.08 0.00
 24 30 5 0.96 0.00
 21 31 5 -9.55 0.00
 23 31 5 -1.93 0.00
 25 31 5 -3.54 0.00
 20 32 5 -7.39 0.00
 22 32 5 -6.21 0.00
 24 32 5 2.10 0.00
 21 33 5 4.95 0.00
 23 33 5 1.46 0.00
 20 34 5 5.45 0.00
 22 34 5 -1.67 0.00
 24 34 5 -3.83 0.00
 19 35 5 2.31 0.00
 21 35 5 6.85 0.00
 23 35 5 -0.99 0.00
 18 36 5 -7.68 0.00
 20 36 5 -6.35 0.00
 22 36 5 -0.54 0.00
 19 37 5 4.32 0.00
 21 37 5 -1.76 0.00
 18 38 5 0.13 0.00
 20 38 5 -3.46 0.00
 22 38 5 -5.18 0.00
 17 39 5 -8.58 0.00
 19 39 5 3.44 0.00
 21 39 5 -1.03 0.00
 16 40 5 -7.52 0.00
 18 40 5 -2.91 0.00
 20 40 5 -0.62 0.00
 15 41 5 -5.01 0.00
 17 41 5 0.87 0.00
 19 41 5 -4.99 0.00
 14 42 5 -7.67 0.00
 16 42 5 -2.19 0.00
 18 42 5 -6.81 0.00
 13 43 5 -16.41 0.00
 15 43 5 0.64 0.00
 17 43 5 -5.71 0.00
 10 44 5 -1.16 0.00
 12 44 5 -4.43 0.00
 14 44 5 1.68 0.00
 16 44 5 0.72 0.00
 9 45 5 -1.69 0.00
 11 45 5 -5.81 0.00
 13 45 5 2.23 0.00
 15 45 5 -6.76 0.00
 17 45 5 -3.59 0.00
 8 46 5 0.50 0.00
 10 46 5 -3.07 0.00
 12 46 5 -0.68 0.00
 14 46 5 1.21 0.00
 16 46 5 -1.49 0.00
 5 47 5 1.28 0.00
 7 47 5 3.92 0.00
 9 47 5 2.09 0.00
 11 47 5 5.18 0.00
 13 47 5 2.11 0.00
 15 47 5 3.67 0.00
 0 48 5 0.68 0.00
 2 48 5 1.68 0.00
 4 48 5 -4.19 0.00
 6 48 5 5.73 0.00
 8 48 5 -3.05 0.00
 10 48 5 2.09 0.00
 12 48 5 2.36 0.00
 14 48 5 -2.35 0.00
 26 0 6 -7.86 0.00
 27 1 6 -0.64 0.00
 27 3 6 8.86 0.00
 27 5 6 1.74 0.00
 27 7 6 -0.10 0.00
 27 9 6 -2.32 0.00
 27 11 6 5.49 0.00
 27 13 6 -2.54 0.00
 26 14 6 -0.57 0.00
 27 15 6 0.40 0.00
 26 16 6 -2.53 0.00
 27 17 6 -1.25 0.00
 26 18 6 -5.95 0.00
 25 19 6 1.09 0.00
 27 19 6 6.51 0.00
 26 20 6 4.16 0.00
 25 21 6 4.83 0.00
 27 21 6 0.57 0.00
 24 22 6 7.26 0.00
 26 22 6 1.00 0.00
 25 23 6 -2.56 0.00
 27 23 6 -0.31 0.00
 24 24 6 3.96 0.00
 26 24 6 2.31 0.00
 23 25 6 -3.02 0.00
 25 25 6 0.68 0.00
 27 25 6 -2.80 0.00
 22 26 6 5.95 0.00
 24 26 6 1.79 0.00
 26 26 6 0.66 0.00
 23 27 6 -1.41 0.00
 25 27 6 -0.90 0.00
 22 28 6 -1.73 0.00
 24 28 6 8.12 0.00
 26 28 6 2.41 0.00
 21 29 6 -2.13 0.00
 23 29 6 1.76 0.00
 25 29 6 -2.09 0.00
 20 30 6 6.33 0.00
 22 30 6 8.42 0.00
 24 30 6 -2.53 0.00
 21 31 6 4.98 0.00
 23 31 6 -8.27 0.00
 25 31 6 1.82 0.00
 20 32 6 -6.41 0.00
 22 32 6 -2.00 0.00
 24 32 6 1.79 0.00
 19 33 6 15.98 0.00
 21 33 6 0.75 0.00
 23 33 6 10.08 0.00
 18 34 6 -4.29 0.00
 20 34 6 -0.50 0.00
 22 34 6 -5.38 0.00
 19 35 6 -10.97 0.00
 21 35 6 2.60 0.00
 23 35 6 0.87 0.00
 18 36 6 2.44 0.00
 20 36 6 3.03 0.00
 22 36 6 -2.18 0.00
 17 37 6 -3.29 0.00
 19 37 6 0.90 0.00
 21 37 6 -2.01 0.00
 16 38 6 -2.13 0.00
 18 38 6 8.22 0.00
 20 38 6 -4.03 0.00
 15 39 6 -15.11 0.00
 17 39 6 -3.40 0.00
 19 39 6 -1.35 0.00
 14 40 6 10.39 0.00
 16 40 6 13.85 0.00
 18 40 6 1.03 0.00
 20 40 6 2.73 0.00
 13 41 6 -1.09 0.00
 15 41 6 -1.49 0.00
 17 41 6 -12.09 0.00
 19 41 6 -2.40 0.00
 12 42 6 -9.16 0.00
 14 42 6 -12.60 0.00
 16 42 6 -1.07 0.00
 18 42 6 4.67 0.00
 11 43 6 -10.56 0.00
 13 43 6 -9.32 0.00
 15 43 6 -3.89 0.00
 17 43 6 1.15 0.00
 10 44 6 -6.06 0.00
 12 44 6 12.98 0.00
 14 44 6 -1.58 0.00
 16 44 6 -6.55 0.00
 7 45 6 4.39 0.00
 9 45 6 2.32 0.00
 11 45 6 4.05 0.00
 13 45 6 -2.38 0.00
 15 45 6 -1.04 0.00
 6 46 6 2.94 0.00
 8 46 6 -4.10 0.00
 10 46 6 3.83 0.00
 12 46 6 -1.92 0.00
 14 46 6 6.59 0.00
 1 47 6 -14.90 0.00
 3 47 6 -4.07 0.00
 5 47 6 -4.20 0.00
 7 47 6 -0.16 0.00
 9 47 6 3.55 0.00
 11 47 6 -5.10 0.00
 13 47 6 0.30 0.00
 0 48 6 3.19 0.00
 2 48 6 9.31 0.00
 4 48 6 1.38 0.00
 6 48 6 1.86 0.00
 8 48 6 4.19 0.00
 10 48 6 -1.39 0.00
 12 48 6 0.98 0.00
 27 1 7 7.02 0.00
 27 3 7 -14.83 0.00
 27 5 7 1.14 0.00
 27 7 7 3.77 0.00
 27 9 7 0.98 0.00
 26 10 7 14.54 0.00
 27 11 7 -4.34 0.00
 26 12 7 -3.93 0.00
 27 13 7 -5.57 0.00
 26 14 7 -1.24 0.00
 27 15 7 -1.17 0.00
 26 16 7 -1.25 0.00
 25 17 7 -1.16 0.00
 27 17 7 1.20 0.00
 26 18 7 -2.48 0.00
 25 19 7 3.10 0.00
 27 19 7 3.29 0.00
 24 20 7 8.46 0.00
 26 20 7 -1.29 0.00
 25 21 7 7.66 0.00
 27 21 7 3.78 0.00
 24 22 7 -10.60 0.00
 26 22 7 -2.52 0.00
 23 23 7 5.12 0.00
 25 23 7 1.19 0.00
 27 23 7 5.00 0.00
 24 24 7 7.42 0.00
 26 24 7 0.14 0.00
 23 25 7 -7.21 0.00
 25 25 7 5.34 0.00
 22 26 7 -5.11 0.00
 24 26 7 -5.83 0.00
 26 26 7 -1.04 0.00
 21 27 7 -2.85 0.00
 23 27 7 6.35 0.00
 25 27 7 0.02 0.00
 22 28 7 -4.85 0.00
 24 28 7 2.51 0.00
 21 29 7 -2.36 0.00
 23 29 7 -4.02 0.00
 25 29 7 -5.07 0.00
 20 30 7 6.38 0.00
 22 30 7 -2.74 0.00
 24 30 7 -6.12 0.00
 19 31 7 3.01 0.00
 21 31 7 -4.95 0.00
 23 31 7 -4.94 0.00
 18 32 7 2.09 0.00
 20 32 7 6.60 0.00
 22 32 7 -1.97 0.00
 24 32 7 0.36 0.00
 19 33 7 -9.89 0.00
 21 33 7 4.99 0.00
 23 33 7 0.10 0.00
 18 34 7 -2.41 0.00
 20 34 7 -3.27 0.00
 22 34 7 2.01 0.00
 17 35 7 -16.94 0.00
 19 35 7 3.84 0.00
 21 35 7 -7.13 0.00
 16 36 7 -3.04 0.00
 18 36 7 -0.10 0.00
 20 36 7 1.16 0.00
 22 36 7 0.46 0.00
 17 37 7 -1.27 0.00
 19 37 7 -6.11 0.00
 21 37 7 2.31 0.00
 16 38 7 -0.77 0.00
 18 38 7 1.93 0.00
 20 38 7 0.43 0.00
 15 39 7 -2.78 0.00
 17 39 7 0.45 0.00
 19 39 7 -0.42 0.00
 14 40 7 -3.41 0.00
 16 40 7 1.59 0.00
 18 40 7 -1.90 0.00
 13 41 7 -13.27 0.00
 15 41 7 -9.24 0.00
 17 41 7 -0.65 0.00
 12 42 7 1.48 0.00
 14 42 7 -3.26 0.00
 16 42 7 -6.71 0.00
 18 42 7 2.62 0.00
 11 43 7 -0.87 0.00
 13 43 7 -7.06 0.00
 15 43 7 2.59 0.00
 17 43 7 -0.94 0.00
 8 44 7 -0.97 0.00
 10 44 7 5.15 0.00
 12 44 7 4.99 0.00
 14 44 7 1.27 0.00
 16 44 7 1.30 0.00
 7 45 7 8.23 0.00
 9 45 7 -4.97 0.00
 11 45 7 1.42 0.00
 13 45 7 2.44 0.00
 15 45 7 -2.05 0.00
 0 46 7 13.74 0.00
 2 46 7 12.30 0.00
 4 46 7 4.03 0.00
 6 46 7 0.69 0.00
 8 46 7 -9.77 0.00
 10 46 7 -10.56 0.00
 12 46 7 -5.96 0.00
 14 46 7 -3.28 0.00
 1 47 7 -5.39 0.00
 3 47 7 4.27 0.00
 5 47 7 4.08 0.00
 7 47 7 4.93 0.00
 9 47 7 14.68 0.00
 11 47 7 2.76 0.00
 13 47 7 -1.54 0.00
 0 48 7 3.79 0.00
 2 48 7 4.61 0.00
 4 48 7 8.91 0.00
 6 48 7 3.01 0.00
 8 48 7 6.25 0.00
 10 48 7 -0.84 0.00
 12 48 7 -1.47 0.00
 26 0 8 16.03 0.00
 27 1 8 3.02 0.00
 26 2 8 -8.89 0.00
 27 3 8 -1.72 0.00
 26 4 8 5.85 0.00
 27 5 8 5.41 0.00
 26 6 8 -0.20 0.00
 27 7 8 -1.29 0.00
 26 8 8 -9.13 0.00
 27 9 8 4.86 0.00
 26 10 8 0.13 0.00
 27 11 8 -1.66 0.00
 26 12 8 -3.07 0.00
 25 13 8 2.28 0.00
 27 13 8 5.74 0.00
 26 14 8 1.16 0.00
 25 15 8 6.84 0.00
 27 15 8 6.06 0.00
 26 16 8 2.00 0.00
 25 17 8 -0.43 0.00
 27 17 8 1.63 0.00
 24 18 8 4.87 0.00
 26 18 8 1.21 0.00
 25 19 8 0.28 0.00
 27 19 8 -4.20 0.00
 24 20 8 2.75 0.00
 26 20 8 0.69 0.00
 23 21 8 -6.90 0.00
 25 21 8 -10.31 0.00
 27 21 8 -1.66 0.00
 24 22 8 -6.46 0.00
 26 22 8 -2.78 0.00
 23 23 8 1.62 0.00
 25 23 8 0.66 0.00
 22 24 8 -3.11 0.00
 24 24 8 -2.86 0.00
 26 24 8 -1.97 0.00
 23 25 8 2.28 0.00
 25 25 8 -3.06 0.00
 22 26 8 0.07 0.00
 24 26 8 0.60 0.00
 21 27 8 1.09 0.00
 23 27 8 -2.45 0.00
 25 27 8 2.63 0.00
 20 28 8 -6.30 0.00
 22 28 8 -5.55 0.00
 24 28 8 -2.57 0.00
 19 29 8 14.57 0.00
 21 29 8 3.83 0.00
 23 29 8 5.86 0.00
 18 30 8 6.54 0.00
 20 30 8 0.30 0.00
 22 30 8 -2.14 0.00
 24 30 8 3.45 0.00
 19 31 8 -2.07 0.00
 21 31 8 1.69 0.00
 23 31 8 2.89 0.00
 18 32 8 0.48 0.00
 20 32 8 2.87 0.00
 22 32 8 2.54 0.00
 17 33 8 3.88 0.00
 19 33 8 12.94 0.00
 21 33 8 4.12 0.00
 18 34 8 -1.44 0.00
 20 34 8 0.59 0.00
 22 34 8 1.00 0.00
 17 35 8 8.44 0.00
 19 35 8 9.17 0.00
 21 35 8 5.28 0.00
 16 36 8 9.96 0.00
 18 36 8 4.27 0.00
 20 36 8 0.33 0.00
 15 37 8 -2.09 0.00
 17 37 8 0.46 0.00
 19 37 8 4.52 0.00
 14 38 8 -0.50 0.00
 16 38 8 -9.21 0.00
 18 38 8 0.94 0.00
 20 38 8 4.08 0.00
 13 39 8 -21.29 0.00
 15 39 8 -10.88 0.00
 17 39 8 -4.43 0.00
 19 39 8 -2.24 0.00
 12 40 8 9.89 0.00
 14 40 8 -6.57 0.00
 16 40 8 -3.15 0.00
 18 40 8 -2.53 0.00
 11 41 8 6.07 0.00
 13 41 8 -19.06 0.00
 15 41 8 -10.49 0.00
 17 41 8 -5.41 0.00
 10 42 8 -3.61 0.00
 12 42 8 -9.69 0.00
 14 42 8 -0.30 0.00
 16 42 8 -3.55 0.00
 9 43 8 -5.83 0.00
 11 43 8 -13.73 0.00
 13 43 8 -3.82 0.00
 15 43 8 -11.05 0.00
 6 44 8 7.22 0.00
 8 44 8 3.49 0.00
 10 44 8 -1.22 0.00
 12 44 8 -8.50 0.00
 14 44 8 -2.41 0.00
 1 45 8 1.25 0.00
 3 45 8 1.13 0.00
 5 45 8 -3.91 0.00
 7 45 8 -5.72 0.00
 9 45 8 -3.46 0.00
 11 45 8 -3.58 0.00
 13 45 8 -9.71 0.00
 0 46 8 -10.03 0.00
 2 46 8 -5.09 0.00
 4 46 8 -17.67 0.00
 6 46 8 -8.58 0.00
 8 46 8 0.06 0.00
 10 46 8 1.59 0.00
 12 46 8 -5.72 0.00
 1 47 8 -0.56 0.00
 3 47 8 -4.50 0.00
 5 47 8 -2.51 0.00
 7 47 8 4.48 0.00
 9 47 8 5.76 0.00
 11 47 8 4.90 0.00
 0 48 8 20.04 0.00
 2 48 8 3.08 0.00
 4 48 8 4.95 0.00
 6 48 8 -6.45 0.00
 8 48 8 -4.59 0.00
 10 48 8 -3.33 0.00
 25 1 9 6.34 0.00
 27 1 9 0.47 0.00
 26 2 9 5.41 0.00
 25 3 9 -1.44 0.00
 27 3 9 3.04 0.00
 26 4 9 3.46 0.00
 25 5 9 0.40 0.00
 27 5 9 1.05 0.00
 26 6 9 -8.68 0.00
 25 7 9 8.67 0.00
 27 7 9 -0.01 0.00
 26 8 9 11.55 0.00
 25 9 9 -6.41 0.00
 27 9 9 0.05 0.00
 26 10 9 -7.02 0.00
 25 11 9 5.35 0.00
 27 11 9 0.60 0.00
 26 12 9 4.37 0.00
 25 13 9 -9.33 0.00
 27 13 9 5.39 0.00
 26 14 9 6.81 0.00
 25 15 9 6.66 0.00
 27 15 9 -5.59 0.00
 24 16 9 4.58 0.00
 26 16 9 -1.04 0.00
 25 17 9 -2.53 0.00
 27 17 9 2.76 0.00
 24 18 9 3.03 0.00
 26 18 9 5.23 0.00
 23 19 9 5.33 0.00
 25 19 9 -1.33 0.00
 27 19 9 0.01 0.00
 24 20 9 -2.31 0.00
 26 20 9 0.84 0.00
 23 21 9 -1.95 0.00
 25 21 9 6.11 0.00
 22 22 9 -2.33 0.00
 24 22 9 -1.62 0.00
 26 22 9 0.78 0.00
 23 23 9 5.54 0.00
 25 23 9 -1.33 0.00
 22 24 9 3.23 0.00
 24 24 9 6.59 0.00
 21 25 9 0.28 0.00
 23 25 9 -1.81 0.00
 25 25 9 1.77 0.00
 20 26 9 -12.98 0.00
 22 26 9 -1.28 0.00
 24 26 9 -6.55 0.00
 21 27 9 -4.36 0.00
 23 27 9 -4.30 0.00
 20 28 9 17.89 0.00
 22 28 9 0.87 0.00
 24 28 9 4.53 0.00
 19 29 9 -3.79 0.00
 21 29 9 -4.03 0.00
 23 29 9 3.66 0.00
 18 30 9 15.24 0.00
 20 30 9 -7.55 0.00
 22 30 9 8.84 0.00
 17 31 9 0.60 0.00
 19 31 9 -5.59 0.00
 21 31 9 -0.06 0.00
 23 31 9 -1.75 0.00
 18 32 9 6.45 0.00
 20 32 9 12.98 0.00
 22 32 9 2.07 0.00
 17 33 9 4.91 0.00
 19 33 9 2.95 0.00
 21 33 9 -1.39 0.00
 16 34 9 12.55 0.00
 18 34 9 14.29 0.00
 20 34 9 2.49 0.00
 15 35 9 40.18 0.00
 17 35 9 14.68 0.00
 19 35 9 8.46 0.00
 21 35 9 2.51 0.00
 16 36 9 9.81 0.00
 18 36 9 6.04 0.00
 20 36 9 4.38 0.00
 15 37 9 -10.68 0.00
 17 37 9 15.97 0.00
 19 37 9 -1.71 0.00
 14 38 9 3.61 0.00
 16 38 9 5.15 0.00
 18 38 9 3.99 0.00
 13 39 9 -16.05 0.00
 15 39 9 11.82 0.00
 17 39 9 -9.05 0.00
 12 40 9 12.25 0.00
 14 40 9 10.67 0.00
 16 40 9 4.83 0.00
 9 41 9 -7.26 0.00
 11 41 9 4.72 0.00
 13 41 9 -0.44 0.00
 15 41 9 -10.18 0.00
 17 41 9 -5.77 0.00
 8 42 9 -6.37 0.00
 10 42 9 -10.85 0.00
 12 42 9 -6.26 0.00
 14 42 9 3.77 0.00
 16 42 9 7.41 0.00
 5 43 9 12.37 0.00
 7 43 9 -0.49 0.00
 9 43 9 17.75 0.00
 11 43 9 -8.78 0.00
 13 43 9 7.26 0.00
 15 43 9 -10.51 0.00
 0 44 9 -7.78 0.00
 2 44 9 -3.28 0.00
 4 44 9 4.71 0.00
 6 44 9 9.63 0.00
 8 44 9 11.31 0.00
 10 44 9 10.57 0.00
 12 44 9 1.40 0.00
 14 44 9 5.49 0.00
 1 45 9 -4.32 0.00
 3 45 9 -6.64 0.00
 5 45 9 -7.29 0.00
 7 45 9 5.71 0.00
 9 45 9 1.18 0.00
 11 45 9 8.96 0.00
 13 45 9 -8.45 0.00
 0 46 9 10.73 0.00
 2 46 9 6.44 0.00
 4 46 9 4.09 0.00
 6 46 9 1.32 0.00
 8 46 9 4.28 0.00
 10 46 9 4.12 0.00
 12 46 9 5.64 0.00
 1 47 9 1.51 0.00
 3 47 9 2.64 0.00
 5 47 9 6.36 0.00
 7 47 9 5.62 0.00
 9 47 9 -1.25 0.00
 0 48 9 1.03 0.00
 2 48 9 4.85 0.00
 4 48 9 4.27 0.00
 6 48 9 0.52 0.00
 8 48 9 0.31 0.00
 24 0 10 5.54 0.00
 26 0 10 -8.81 0.00
 25 1 10 -3.99 0.00
 27 1 10 -1.86 0.00
 24 2 10 -9.16 0.00
 26 2 10 3.70 0.00
 25 3 10 -0.33 0.00
 27 3 10 0.19 0.00
 26 4 10 0.56 0.00
 25 5 10 6.95 0.00
 27 5 10 -2.24 0.00
 26 6 10 -0.04 0.00
 25 7 10 5.16 0.00
 27 7 10 6.58 0.00
 24 8 10 3.80 0.00
 26 8 10 -0.12 0.00
 25 9 10 9.66 0.00
 27 9 10 4.19 0.00
 24 10 10 -4.94 0.00
 26 10 10 3.51 0.00
 25 11 10 -5.59 0.00
 27 11 10 1.67 0.00
 24 12 10 1.09 0.00
 26 12 10 -5.03 0.00
 25 13 10 4.48 0.00
 27 13 10 1.02 0.00
 24 14 10 -0.47 0.00
 26 14 10 1.35 0.00
 25 15 10 -1.17 0.00
 27 15 10 -0.71 0.00
 24 16 10 -6.32 0.00
 26 16 10 -3.41 0.00
 23 17 10 0.69 0.00
 25 17 10 -2.91 0.00
 24 18 10 6.49 0.00
 26 18 10 -2.32 0.00
 23 19 10 1.36 0.00
 25 19 10 2.46 0.00
 22 20 10 3.50 0.00
 24 20 10 2.51 0.00
 26 20 10 6.51 0.00
 23 21 10 -3.21 0.00
 25 21 10 -0.01 0.00
 22 22 10 0.17 0.00
 24 22 10 3.17 0.00
 21 23 10 3.10 0.00
 23 23 10 6.00 0.00
 25 23 10 5.64 0.00
 20 24 10 1.35 0.00
 22 24 10 3.10 0.00
 24 24 10 -1.47 0.00
 21 25 10 -10.16 0.00
 23 25 10 -6.52 0.00
 20 26 10 14.82 0.00
 22 26 10 0.15 0.00
 24 26 10 0.03 0.00
 19 27 10 -5.04 0.00
 21 27 10 3.02 0.00
 23 27 10 4.12 0.00
 18 28 10 11.62 0.00
 20 28 10 4.26 0.00
 22 28 10 8.25 0.00
 17 29 10 -3.82 0.00
 19 29 10 5.94 0.00
 21 29 10 5.82 0.00
 23 29 10 -0.61 0.00
 18 30 10 19.60 0.00
 20 30 10 12.75 0.00
 22 30 10 2.63 0.00
 17 31 10 -8.24 0.00
 19 31 10 5.46 0.00
 21 31 10 3.15 0.00
 16 32 10 16.05 0.00
 18 32 10 4.75 0.00
 20 32 10 7.48 0.00
 15 33 10 -16.74 0.00
 17 33 10 -2.88 0.00
 19 33 10 -5.14 0.00
 21 33 10 1.15 0.00
 16 34 10 13.94 0.00
 18 34 10 10.26 0.00
 20 34 10 -1.60 0.00
 15 35 10 -2.65 0.00
 17 35 10 -4.71 0.00
 19 35 10 -2.58 0.00
 14 36 10 2.73 0.00
 16 36 10 0.92 0.00
 18 36 10 1.10 0.00
 13 37 10 -19.41 0.00
 15 37 10 -13.31 0.00
 17 37 10 -7.77 0.00
 12 38 10 -13.52 0.00
 14 38 10 -2.37 0.00
 16 38 10 8.42 0.00
 18 38 10 0.65 0.00
 11 39 10 -1.40 0.00
 13 39 10 5.42 0.00
 15 39 10 -8.12 0.00
 17 39 10 -0.51 0.00
 10 40 10 -9.94 0.00
 12 40 10 -9.50 0.00
 14 40 10 0.36 0.00
 16 40 10 0.16 0.00
 7 41 10 9.97 0.00
 9 41 10 2.55 0.00
 11 41 10 0.18 0.00
 13 41 10 -3.75 0.00
 15 41 10 1.71 0.00
 0 42 10 2.42 0.00
 2 42 10 7.46 0.00
 4 42 10 -17.15 0.00
 6 42 10 -22.41 0.00
 8 42 10 -18.97 0.00
 10 42 10 -9.60 0.00
 12 42 10 -7.32 0.00
 14 42 10 0.63 0.00
 1 43 10 -3.40 0.00
 3 43 10 3.92 0.00
 5 43 10 5.39 0.00
 7 43 10 9.45 0.00
 9 43 10 12.16 0.00
 11 43 10 1.11 0.00
 13 43 10 0.74 0.00
 0 44 10 19.77 0.00
 2 44 10 -2.54 0.00
 4 44 10 -3.59 0.00
 6 44 10 -15.95 0.00
 8 44 10 -12.63 0.00
 10 44 10 -10.82 0.00
 12 44 10 6.68 0.00
 1 45 10 7.11 0.00
 3 45 10 -4.10 0.00
 5 45 10 1.63 0.00
 7 45 10 -2.25 0.00
 9 45 10 -6.93 0.00
 11 45 10 -0.01 0.00
 0 46 10 -15.98 0.00
 2 46 10 -7.76 0.00
 4 46 10 -1.50 0.00
 6 46 10 -5.31 0.00
 8 46 10 -10.71 0.00
 10 46 10 -8.13 0.00
 1 47 10 -17.82 0.00
 3 47 10 -4.96 0.00
 5 47 10 -1.78 0.00
 7 47 10 3.09 0.00
 0 48 10 0.45 0.00
 2 48 10 2.43 0.00
 4 48 10 -1.33 0.00
 6 48 10 1.21 0.00
 23 1 11 9.92 0.00
 25 1 11 -9.93 0.00
 27 1 11 4.18 0.00
 24 2 11 2.86 0.00
 26 2 11 -3.41 0.00
 25 3 11 0.88 0.00
 27 3 11 -9.51 0.00
 24 4 11 -7.45 0.00
 26 4 11 0.03 0.00
 25 5 11 -14.52 0.00
 27 5 11 -0.17 0.00
 24 6 11 2.57 0.00
 26 6 11 -0.45 0.00
 25 7 11 3.07 0.00
 27 7 11 -2.40 0.00
 24 8 11 -1.12 0.00
 26 8 11 -0.95 0.00
 23 9 11 -2.37 0.00
 25 9 11 -2.93 0.00
 27 9 11 2.60 0.00
 24 10 11 -2.49 0.00
 26 10 11 -5.52 0.00
 23 11 11 0.59 0.00
 25 11 11 3.82 0.00
 27 11 11 -6.18 0.00
 24 12 11 3.13 0.00
 26 12 11 4.53 0.00
 23 13 11 -5.91 0.00
 25 13 11 -4.92 0.00
 24 14 11 6.06 0.00
 26 14 11 1.93 0.00
 23 15 11 -0.16 0.00
 25 15 11 0.36 0.00
 22 16 11 0.54 0.00
 24 16 11 -2.19 0.00
 26 16 11 2.90 0.00
 23 17 11 4.03 0.00
 25 17 11 1.95 0.00
 22 18 11 1.25 0.00
 24 18 11 -0.51 0.00
 21 19 11 -5.96 0.00
 23 19 11 -0.06 0.00
 25 19 11 0.50 0.00
 22 20 11 -0.56 0.00
 24 20 11 -1.26 0.00
 21 21 11 -0.14 0.00
 23 21 11 0.94 0.00
 25 21 11 -0.17 0.00
 20 22 11 4.74 0.00
 22 22 11 0.10 0.00
 24 22 11 3.94 0.00
 21 23 11 8.21 0.00
 23 23 11 5.29 0.00
 20 24 11 1.49 0.00
 22 24 11 -1.03 0.00
 24 24 11 -4.16 0.00
 19 25 11 2.60 0.00
 21 25 11 4.06 0.00
 23 25 11 5.60 0.00
 18 26 11 14.73 0.00
 20 26 11 -0.97 0.00
 22 26 11 0.89 0.00
 19 27 11 -5.30 0.00
 21 27 11 0.13 0.00
 23 27 11 4.54 0.00
 18 28 11 8.93 0.00
 20 28 11 8.39 0.00
 22 28 11 5.50 0.00
 17 29 11 -2.30 0.00
 19 29 11 5.17 0.00
 21 29 11 8.02 0.00
 16 30 11 17.20 0.00
 18 30 11 -1.40 0.00
 20 30 11 3.43 0.00
 15 31 11 -7.47 0.00
 17 31 11 -5.04 0.00
 19 31 11 -3.41 0.00
 21 31 11 -4.20 0.00
 14 32 11 13.81 0.00
 16 32 11 -10.70 0.00
 18 32 11 2.20 0.00
 20 32 11 -2.28 0.00
 15 33 11 -5.62 0.00
 17 33 11 -7.32 0.00
 19 33 11 -1.83 0.00
 14 34 11 6.35 0.00
 16 34 11 11.94 0.00
 18 34 11 -0.45 0.00
 13 35 11 -13.52 0.00
 15 35 11 -14.28 0.00
 17 35 11 -1.69 0.00
 19 35 11 0.60 0.00
 12 36 11 4.87 0.00
 14 36 11 -5.16 0.00
 16 36 11 -5.28 0.00
 18 36 11 0.05 0.00
 11 37 11 -5.45 0.00
 13 37 11 -4.52 0.00
 15 37 11 -4.31 0.00
 17 37 11 -10.02 0.00
 10 38 11 2.23 0.00
 12 38 11 -1.61 0.00
 14 38 11 6.32 0.00
 16 38 11 1.59 0.00
 7 39 11 -10.24 0.00
 9 39 11 -7.72 0.00
 11 39 11 -11.73 0.00
 13 39 11 -7.48 0.00
 15 39 11 -6.62 0.00
 0 40 11 -0.14 0.00
 2 40 11 3.76 0.00
 6 40 11 3.76 0.00
 8 40 11 0.17 0.00
 10 40 11 5.79 0.00
 12 40 11 3.19 0.00
 14 40 11 -4.30 0.00
 1 41 11 9.11 0.00
 3 41 11 4.38 0.00
 5 41 11 -5.46 0.00
 7 41 11 3.84 0.00
 9 41 11 10.59 0.00
 11 41 11 -1.32 0.00
 13 41 11 -4.44 0.00
 0 42 11 3.29 0.00
 2 42 11 2.85 0.00
 4 42 11 1.77 0.00
 6 42 11 -13.14 0.00
 8 42 11 -2.62 0.00
 10 42 11 -3.96 0.00
 12 42 11 -4.36 0.00
 1 43 11 7.22 0.00
 3 43 11 1.18 0.00
 5 43 11 -1.55 0.00
 7 43 11 4.51 0.00
 9 43 11 -2.58 0.00
 11 43 11 6.96 0.00
 0 44 11 7.97 0.00
 2 44 11 2.22 0.00
 4 44 11 -4.92 0.00
 6 44 11 -5.76 0.00
 8 44 11 -7.00 0.00
 10 44 11 -2.73 0.00
 1 45 11 -4.55 0.00
 3 45 11 -2.24 0.00
 5 45 11 -0.77 0.00
 7 45 11 -2.36 0.00
 9 45 11 0.01 0.00
 0 46 11 -5.56 0.00
 2 46 11 -2.06 0.00
 4 46 11 -1.64 0.00
 6 46 11 2.67 0.00
 1 47 11 7.38 0.00
 3 47 11 5.26 0.00
 5 47 11 0.71 0.00
 0 48 11 4.35 0.00
 22 0 12 5.10 0.00
 24 0 12 -1.70 0.00
 26 0 12 5.60 0.00
 23 1 12 0.68 0.00
 25 1 12 -1.01 0.00
 27 1 12 -5.17 0.00
 22 2 12 -3.16 0.00
 24 2 12 5.12 0.00
 26 2 12 -0.70 0.00
 23 3 12 3.98 0.00
 25 3 12 -1.31 0.00
 22 4 12 6.60 0.00
 24 4 12 5.20 0.00
 26 4 12 1.17 0.00
 23 5 12 10.33 0.00
 25 5 12 2.69 0.00
 22 6 12 3.90 0.00
 24 6 12 -0.55 0.00
 26 6 12 7.92 0.00
 23 7 12 -5.92 0.00
 25 7 12 2.98 0.00
 22 8 12 1.78 0.00
 24 8 12 3.11 0.00
 26 8 12 -6.40 0.00
 23 9 12 7.53 0.00
 25 9 12 -1.98 0.00
 22 10 12 -0.39 0.00
 24 10 12 -5.59 0.00
 26 10 12 -0.96 0.00
 23 11 12 -1.72 0.00
 25 11 12 6.69 0.00
 22 12 12 -9.21 0.00
 24 12 12 -3.51 0.00
 26 12 12 -3.24 0.00
 23 13 12 7.10 0.00
 25 13 12 0.10 0.00
 22 14 12 9.62 0.00
 24 14 12 1.05 0.00
 21 15 12 3.46 0.00
 23 15 12 -0.03 0.00
 25 15 12 2.04 0.00
 22 16 12 -12.45 0.00
 24 16 12 -1.73 0.00
 21 17 12 -7.24 0.00
 23 17 12 -4.68 0.00
 25 17 12 -0.04 0.00
 22 18 12 -2.66 0.00
 24 18 12 -5.14 0.00
 21 19 12 1.86 0.00
 23 19 12 0.48 0.00
 20 20 12 2.00 0.00
 22 20 12 -1.04 0.00
 24 20 12 -3.09 0.00
 21 21 12 -2.83 0.00
 23 21 12 1.18 0.00
 20 22 12 -1.96 0.00
 22 22 12 -2.69 0.00
 19 23 12 -4.01 0.00
 21 23 12 2.22 0.00
 23 23 12 -1.34 0.00
 18 24 12 -0.63 0.00
 20 24 12 -6.58 0.00
 22 24 12 -5.04 0.00
 19 25 12 -1.48 0.00
 21 25 12 -1.96 0.00
 18 26 12 4.26 0.00
 20 26 12 -6.42 0.00
 22 26 12 -2.42 0.00
 17 27 12 -5.42 0.00
 19 27 12 8.40 0.00
 21 27 12 2.79 0.00
 16 28 12 1.24 0.00
 18 28 12 -4.87 0.00
 20 28 12 4.57 0.00
 15 29 12 -4.30 0.00
 17 29 12 14.32 0.00
 19 29 12 -0.22 0.00
 21 29 12 -1.58 0.00
 14 30 12 0.96 0.00
 16 30 12 7.06 0.00
 18 30 12 -4.47 0.00
 20 30 12 -6.35 0.00
 13 31 12 -15.85 0.00
 15 31 12 10.51 0.00
 17 31 12 1.30 0.00
 19 31 12 0.92 0.00
 14 32 12 12.42 0.00
 16 32 12 -2.34 0.00
 18 32 12 3.23 0.00
 13 33 12 -0.37 0.00
 15 33 12 5.32 0.00
 17 33 12 3.41 0.00
 19 33 12 2.64 0.00
 12 34 12 11.29 0.00
 14 34 12 1.17 0.00
 16 34 12 8.42 0.00
 18 34 12 3.39 0.00
 11 35 12 -8.38 0.00
 13 35 12 3.41 0.00
 15 35 12 -6.15 0.00
 17 35 12 -0.75 0.00
 10 36 12 7.51 0.00
 12 36 12 -1.10 0.00
 14 36 12 6.75 0.00
 16 36 12 -3.51 0.00
 9 37 12 -3.66 0.00
 11 37 12 -1.88 0.00
 13 37 12 0.63 0.00
 15 37 12 4.41 0.00
 0 38 12 9.17 0.00
 2 38 12 -5.87 0.00
 4 38 12 -3.06 0.00
 6 38 12 -15.61 0.00
 8 38 12 -17.42 0.00
 10 38 12 -18.94 0.00
 12 38 12 -3.82 0.00
 14 38 12 -5.87 0.00
 1 39 12 -15.80 0.00
 3 39 12 -16.40 0.00
 5 39 12 -4.72 0.00
 7 39 12 -3.77 0.00
 9 39 12 -7.84 0.00
 11 39 12 -0.43 0.00
 13 39 12 0.57 0.00
 0 40 12 -24.64 0.00
 2 40 12 -2.31 0.00
 4 40 12 -3.33 0.00
 6 40 12 8.13 0.00
 8 40 12 11.51 0.00
 10 40 12 7.04 0.00
 12 40 12 -0.06 0.00
 1 41 12 -5.15 0.00
 3 41 12 2.92 0.00
 5 41 12 1.62 0.00
 7 41 12 -4.03 0.00
 9 41 12 -0.56 0.00
 11 41 12 -0.63 0.00
 0 42 12 13.65 0.00
 2 42 12 -11.39 0.00
 4 42 12 10.59 0.00
 6 42 12 2.40 0.00
 8 42 12 -1.87 0.00
 10 42 12 -2.24 0.00
 1 43 12 -6.42 0.00
 3 43 12 -9.50 0.00
 5 43 12 -2.08 0.00
 7 43 12 0.82 0.00
 9 43 12 1.23 0.00
 0 44 12 -11.70 0.00
 2 44 12 12.58 0.00
 4 44 12 -1.93 0.00
 6 44 12 1.44 0.00
 8 44 12 1.22 0.00
 1 45 12 -0.12 0.00
 3 45 12 4.93 0.00
 5 45 12 -1.86 0.00
 0 46 12 11.04 0.00
 2 46 12 0.25 0.00
 4 46 12 -0.03 0.00
 21 1 13 6.76 0.00
 23 1 13 -7.34 0.00
 25 1 13 -1.03 0.00
 22 2 13 10.84 0.00
 24 2 13 8.14 0.00
 26 2 13 6.27 0.00
 21 3 13 -7.14 0.00
 23 3 13 5.01 0.00
 25 3 13 -1.19 0.00
 22 4 13 6.66 0.00
 24 4 13 7.31 0.00
 21 5 13 -9.42 0.00
 23 5 13 -1.71 0.00
 25 5 13 -1.64 0.00
 22 6 13 3.02 0.00
 24 6 13 -3.33 0.00
 21 7 13 11.45 0.00
 23 7 13 -7.34 0.00
 25 7 13 5.15 0.00
 22 8 13 -5.57 0.00
 24 8 13 3.21 0.00
 21 9 13 -5.94 0.00
 23 9 13 7.61 0.00
 25 9 13 -7.54 0.00
 22 10 13 6.96 0.00
 24 10 13 -2.42 0.00
 21 11 13 3.84 0.00
 23 11 13 -2.29 0.00
 25 11 13 3.56 0.00
 22 12 13 6.97 0.00
 24 12 13 4.88 0.00
 21 13 13 8.76 0.00
 23 13 13 3.77 0.00
 20 14 13 14.50 0.00
 22 14 13 3.95 0.00
 24 14 13 2.57 0.00
 21 15 13 -7.13 0.00
 23 15 13 3.72 0.00
 20 16 13 -2.51 0.00
 22 16 13 4.57 0.00
 24 16 13 1.81 0.00
 21 17 13 4.04 0.00
 23 17 13 -1.27 0.00
 20 18 13 7.51 0.00
 22 18 13 0.06 0.00
 19 19 13 -3.16 0.00
 21 19 13 -1.93 0.00
 23 19 13 -2.19 0.00
 20 20 13 6.10 0.00
 22 20 13 -0.03 0.00
 19 21 13 -12.76 0.00
 21 21 13 -4.17 0.00
 23 21 13 -2.19 0.00
 18 22 13 9.09 0.00
 20 22 13 -5.59 0.00
 22 22 13 4.55 0.00
 17 23 13 -5.16 0.00
 19 23 13 -1.48 0.00
 21 23 13 -3.93 0.00
 18 24 13 0.17 0.00
 20 24 13 2.05 0.00
 22 24 13 -4.14 0.00
 17 25 13 -4.04 0.00
 19 25 13 -3.38 0.00
 21 25 13 -2.06 0.00
 16 26 13 13.21 0.00
 18 26 13 -5.07 0.00
 20 26 13 4.77 0.00
 15 27 13 -2.97 0.00
 17 27 13 -4.31 0.00
 19 27 13 -4.40 0.00
 14 28 13 12.14 0.00
 16 28 13 -4.68 0.00
 18 28 13 7.75 0.00
 20 28 13 -1.30 0.00
 13 29 13 10.28 0.00
 15 29 13 4.30 0.00
 17 29 13 4.95 0.00
 19 29 13 0.18 0.00
 12 30 13 4.69 0.00
 14 30 13 4.14 0.00
 16 30 13 0.26 0.00
 18 30 13 3.34 0.00
 11 31 13 15.82 0.00
 13 31 13 -7.66 0.00
 15 31 13 7.36 0.00
 17 31 13 -2.18 0.00
 12 32 13 6.47 0.00
 14 32 13 -8.72 0.00
 16 32 13 4.99 0.00
 18 32 13 -2.98 0.00
 11 33 13 3.99 0.00
 13 33 13 21.67 0.00
 15 33 13 3.66 0.00
 17 33 13 5.78 0.00
 0 34 13 12.15 0.00
 8 34 13 -10.45 0.00
 10 34 13 -0.46 0.00
 12 34 13 -3.49 0.00
 14 34 13 5.66 0.00
 16 34 13 -0.37 0.00
 1 35 13 -6.84 0.00
 5 35 13 -0.75 0.00
 7 35 13 -5.99 0.00
 9 35 13 13.75 0.00
 11 35 13 8.93 0.00
 13 35 13 4.61 0.00
 15 35 13 8.14 0.00
 0 36 13 -44.82 0.00
 2 36 13 -24.41 0.00
 4 36 13 -18.84 0.00
 6 36 13 -9.94 0.00
 8 36 13 3.02 0.00
 10 36 13 3.80 0.00
 12 36 13 -5.77 0.00
 14 36 13 1.06 0.00
 1 37 13 -3.01 0.00
 3 37 13 -10.13 0.00
 5 37 13 -9.87 0.00
 7 37 13 3.24 0.00
 9 37 13 -10.61 0.00
 11 37 13 1.69 0.00
 13 37 13 2.11 0.00
 0 38 13 -6.65 0.00
 2 38 13 -6.98 0.00
 4 38 13 -2.99 0.00
 6 38 13 -0.82 0.00
 8 38 13 -3.09 0.00
 10 38 13 -4.99 0.00
 12 38 13 0.67 0.00
 1 39 13 -17.61 0.00
 3 39 13 1.00 0.00
 5 39 13 0.12 0.00
 7 39 13 4.94 0.00
 9 39 13 8.95 0.00
 11 39 13 3.55 0.00
 0 40 13 2.60 0.00
 2 40 13 1.52 0.00
 4 40 13 8.45 0.00
 6 40 13 5.13 0.00
 8 40 13 11.11 0.00
 10 40 13 1.25 0.00
 1 41 13 5.35 0.00
 3 41 13 -3.69 0.00
 5 41 13 1.54 0.00
 7 41 13 -6.20 0.00
 9 41 13 -6.70 0.00
 0 42 13 -6.62 0.00
 2 42 13 -2.97 0.00
 4 42 13 -5.93 0.00
 6 42 13 6.30 0.00
 8 42 13 -5.50 0.00
 1 43 13 -4.59 0.00
 3 43 13 3.83 0.00
 5 43 13 -1.26 0.00
 7 43 13 -1.49 0.00
 0 44 13 2.69 0.00
 2 44 13 -0.04 0.00
 4 44 13 5.45 0.00
 20 0 14 -9.12 0.00
 22 0 14 2.16 0.00
 24 0 14 -12.54 0.00
 21 1 14 -0.75 0.00
 23 1 14 -0.70 0.00
 20 2 14 -2.76 0.00
 22 2 14 -10.66 0.00
 24 2 14 2.49 0.00
 21 3 14 -5.08 0.00
 23 3 14 1.44 0.00
 20 4 14 1.74 0.00
 22 4 14 1.40 0.00
 24 4 14 -2.45 0.00
 21 5 14 8.84 0.00
 23 5 14 -2.90 0.00
 20 6 14 -10.49 0.00
 22 6 14 1.94 0.00
 24 6 14 2.57 0.00
 21 7 14 -2.50 0.00
 23 7 14 5.24 0.00
 20 8 14 13.08 0.00
 22 8 14 -5.77 0.00
 24 8 14 -1.34 0.00
 21 9 14 11.80 0.00
 23 9 14 4.53 0.00
 20 10 14 -16.89 0.00
 22 10 14 0.31 0.00
 24 10 14 -2.84 0.00
 21 11 14 -0.48 0.00
 23 11 14 3.68 0.00
 20 12 14 6.18 0.00
 22 12 14 -1.36 0.00
 19 13 14 -3.06 0.00
 21 13 14 -1.20 0.00
 23 13 14 -0.36 0.00
 20 14 14 10.01 0.00
 22 14 14 3.08 0.00
 19 15 14 2.07 0.00
 21 15 14 0.41 0.00
 23 15 14 1.76 0.00
 18 16 14 -0.06 0.00
 20 16 14 -2.08 0.00
 22 16 14 3.59 0.00
 19 17 14 -7.22 0.00
 21 17 14 1.48 0.00
 18 18 14 0.51 0.00
 20 18 14 -2.50 0.00
 22 18 14 -1.52 0.00
 17 19 14 -2.74 0.00
 19 19 14 4.64 0.00
 21 19 14 5.21 0.00
 18 20 14 10.32 0.00
 20 20 14 3.83 0.00
 22 20 14 0.36 0.00
 17 21 14 -5.03 0.00
 19 21 14 0.47 0.00
 21 21 14 -1.92 0.00
 16 22 14 11.69 0.00
 18 22 14 5.87 0.00
 20 22 14 9.32 0.00
 17 23 14 2.77 0.00
 19 23 14 -4.93 0.00
 21 23 14 -2.69 0.00
 16 24 14 -7.42 0.00
 18 24 14 2.46 0.00
 20 24 14 0.53 0.00
 15 25 14 -1.48 0.00
 17 25 14 -2.20 0.00
 19 25 14 1.01 0.00
 14 26 14 3.04 0.00
 16 26 14 8.33 0.00
 18 26 14 -3.58 0.00
 13 27 14 -13.54 0.00
 15 27 14 5.43 0.00
 17 27 14 -0.32 0.00
 19 27 14 0.37 0.00
 12 28 14 6.68 0.00
 14 28 14 2.30 0.00
 16 28 14 3.10 0.00
 18 28 14 4.96 0.00
 11 29 14 0.57 0.00
 13 29 14 -0.44 0.00
 15 29 14 -3.21 0.00
 17 29 14 0.95 0.00
 10 30 14 3.24 0.00
 12 30 14 4.57 0.00
 14 30 14 2.08 0.00
 16 30 14 -4.56 0.00
 9 31 14 -10.19 0.00
 11 31 14 -18.47 0.00
 13 31 14 1.15 0.00
 15 31 14 -5.97 0.00
 17 31 14 -3.34 0.00
 6 32 14 10.83 0.00
 8 32 14 3.40 0.00
 10 32 14 10.98 0.00
 12 32 14 6.62 0.00
 14 32 14 4.90 0.00
 16 32 14 4.87 0.00
 1 33 14 -3.69 0.00
 3 33 14 -17.64 0.00
 5 33 14 -19.52 0.00
 7 33 14 -11.13 0.00
 9 33 14 -20.49 0.00
 11 33 14 2.20 0.00
 13 33 14 -6.30 0.00
 15 33 14 0.01 0.00
 0 34 14 -5.54 0.00
 2 34 14 -8.41 0.00
 4 34 14 -5.48 0.00
 6 34 14 -11.52 0.00
 8 34 14 0.66 0.00
 10 34 14 1.89 0.00
 12 34 14 -1.32 0.00
 14 34 14 -3.98 0.00
 1 35 14 -0.44 0.00
 3 35 14 0.91 0.00
 5 35 14 -4.17 0.00
 7 35 14 -5.57 0.00
 9 35 14 -3.02 0.00
 11 35 14 -7.02 0.00
 13 35 14 -1.19 0.00
 0 36 14 -4.81 0.00
 2 36 14 -8.60 0.00
 4 36 14 -0.69 0.00
 6 36 14 -0.58 0.00
 8 36 14 4.98 0.00
 10 36 14 -4.32 0.00
 12 36 14 -2.62 0.00
 1 37 14 13.72 0.00
 3 37 14 3.83 0.00
 5 37 14 0.63 0.00
 7 37 14 -10.89 0.00
 9 37 14 -4.69 0.00
 11 37 14 -2.26 0.00
 0 38 14 -2.20 0.00
 2 38 14 -4.85 0.00
 4 38 14 -6.80 0.00
 6 38 14 5.49 0.00
 8 38 14 -4.65 0.00
 10 38 14 4.10 0.00
 1 39 14 0.42 0.00
 3 39 14 -4.95 0.00
 5 39 14 -12.02 0.00
 7 39 14 -3.52 0.00
 9 39 14 -1.16 0.00
 0 40 14 2.46 0.00
 2 40 14 4.62 0.00
 4 40 14 -2.30 0.00
 6 40 14 -7.98 0.00
 8 40 14 3.74 0.00
 1 41 14 3.18 0.00
 3 41 14 0.69 0.00
 5 41 14 -6.13 0.00
 7 41 14 -4.79 0.00
 0 42 14 5.62 0.00
 2 42 14 1.32 0.00
 4 42 14 -1.09 0.00
 19 1 15 12.11 0.00
 21 1 15 -8.55 0.00
 23 1 15 3.27 0.00
 18 2 15 18.85 0.00
 20 2 15 12.99 0.00
 22 2 15 2.17 0.00
 19 3 15 -5.18 0.00
 21 3 15 14.49 0.00
 23 3 15 -2.09 0.00
 18 4 15 2.73 0.00
 20 4 15 -6.19 0.00
 22 4 15 2.23 0.00
 19 5 15 3.67 0.00
 21 5 15 -3.49 0.00
 23 5 15 3.91 0.00
 18 6 15 0.26 0.00
 20 6 15 7.85 0.00
 22 6 15 -5.57 0.00
 19 7 15 3.49 0.00
 21 7 15 5.11 0.00
 23 7 15 4.34 0.00
 18 8 15 7.06 0.00
 20 8 15 3.29 0.00
 22 8 15 8.29 0.00
 19 9 15 -1.65 0.00
 21 9 15 -0.11 0.00
 23 9 15 0.65 0.00
 18 10 15 2.08 0.00
 20 10 15 2.25 0.00
 22 10 15 -3.64 0.00
 19 11 15 1.15 0.00
 21 11 15 2.63 0.00
 18 12 15 -4.53 0.00
 20 12 15 -0.46 0.00
 22 12 15 -1.83 0.00
 19 13 15 5.79 0.00
 21 13 15 -0.96 0.00
 18 14 15 5.97 0.00
 20 14 15 -1.67 0.00
 22 14 15 3.00 0.00
 17 15 15 -11.96 0.00
 19 15 15 -12.26 0.00
 21 15 15 1.10 0.00
 18 16 15 -7.96 0.00
 20 16 15 0.33 0.00
 17 17 15 -4.88 0.00
 19 17 15 -2.53 0.00
 21 17 15 -2.43 0.00
 16 18 15 -7.48 0.00
 18 18 15 -3.83 0.00
 20 18 15 -4.31 0.00
 17 19 15 4.76 0.00
 19 19 15 5.18 0.00
 21 19 15 3.45 0.00
 16 20 15 1.60 0.00
 18 20 15 -7.46 0.00
 20 20 15 -3.12 0.00
 15 21 15 -3.01 0.00
 17 21 15 2.54 0.00
 19 21 15 -0.60 0.00
 14 22 15 -4.55 0.00
 16 22 15 -2.63 0.00
 18 22 15 -4.59 0.00
 20 22 15 0.00 0.00
 13 23 15 0.87 0.00
 15 23 15 -0.18 0.00
 17 23 15 0.31 0.00
 19 23 15 0.26 0.00
 14 24 15 2.44 0.00
 16 24 15 -3.44 0.00
 18 24 15 1.91 0.00
 13 25 15 -1.78 0.00
 15 25 15 6.86 0.00
 17 25 15 0.08 0.00
 12 26 15 4.10 0.00
 14 26 15 -2.46 0.00
 16 26 15 0.08 0.00
 18 26 15 4.06 0.00
 11 27 15 5.02 0.00
 13 27 15 0.96 0.00
 15 27 15 -2.34 0.00
 17 27 15 3.48 0.00
 10 28 15 -7.33 0.00
 12 28 15 -2.84 0.00
 14 28 15 -7.35 0.00
 16 28 15 -3.29 0.00
 7 29 15 8.51 0.00
 9 29 15 4.57 0.00
 11 29 15 8.78 0.00
 13 29 15 4.35 0.00
 15 29 15 4.55 0.00
 6 30 15 -0.56 0.00
 8 30 15 -6.24 0.00
 10 30 15 -0.66 0.00
 12 30 15 -9.47 0.00
 14 30 15 -2.72 0.00
 16 30 15 -0.83 0.00
 1 31 15 5.03 0.00
 3 31 15 -2.65 0.00
 5 31 15 6.15 0.00
 7 31 15 -3.31 0.00
 9 31 15 -0.22 0.00
 11 31 15 -9.63 0.00
 13 31 15 1.95 0.00
 15 31 15 -1.41 0.00
 0 32 15 -0.28 0.00
 2 32 15 -10.24 0.00
 4 32 15 5.44 0.00
 6 32 15 5.11 0.00
 8 32 15 6.32 0.00
 10 32 15 -0.68 0.00
 12 32 15 -3.28 0.00
 14 32 15 -4.20 0.00
 1 33 15 -3.50 0.00
 3 33 15 -2.52 0.00
 5 33 15 -11.26 0.00
 7 33 15 -6.53 0.00
 9 33 15 -13.25 0.00
 11 33 15 -0.16 0.00
 13 33 15 -4.42 0.00
 0 34 15 -0.52 0.00
 2 34 15 13.41 0.00
 4 34 15 6.97 0.00
 6 34 15 -1.34 0.00
 8 34 15 2.73 0.00
 10 34 15 -2.04 0.00
 12 34 15 1.31 0.00
 1 35 15 -4.36 0.00
 3 35 15 4.34 0.00
 5 35 15 0.12 0.00
 7 35 15 -2.40 0.00
 9 35 15 -1.15 0.00
 11 35 15 -2.81 0.00
 0 36 15 2.57 0.00
 2 36 15 -4.09 0.00
 4 36 15 -7.21 0.00
 6 36 15 4.15 0.00
 8 36 15 -6.98 0.00
 10 36 15 1.28 0.00
 1 37 15 -4.20 0.00
 3 37 15 -7.75 0.00
 5 37 15 -4.55 0.00
 7 37 15 -9.27 0.00
 9 37 15 -3.61 0.00
 0 38 15 5.07 0.00
 2 38 15 -0.69 0.00
 4 38 15 -3.24 0.00
 6 38 15 -10.44 0.00
 8 38 15 -3.27 0.00
 1 39 15 -1.64 0.00
 3 39 15 -1.25 0.00
 5 39 15 -1.72 0.00
 7 39 15 0.31 0.00
 0 40 15 8.45 0.00
 2 40 15 8.41 0.00
 4 40 15 4.06 0.00
 16 0 16 -22.56 0.00
 18 0 16 0.15 0.00
 20 0 16 8.21 0.00
 22 0 16 -9.33 0.00
 17 1 16 5.66 0.00
 19 1 16 2.68 0.00
 21 1 16 3.37 0.00
 18 2 16 5.50 0.00
 20 2 16 -4.68 0.00
 22 2 16 6.53 0.00
 17 3 16 -18.93 0.00
 19 3 16 -10.05 0.00
 21 3 16 -4.58 0.00
 18 4 16 3.55 0.00
 20 4 16 8.51 0.00
 22 4 16 -0.67 0.00
 17 5 16 7.43 0.00
 19 5 16 -1.68 0.00
 21 5 16 1.73 0.00
 18 6 16 7.48 0.00
 20 6 16 8.09 0.00
 22 6 16 3.95 0.00
 17 7 16 -2.48 0.00
 19 7 16 5.25 0.00
 21 7 16 -3.90 0.00
 18 8 16 9.55 0.00
 20 8 16 3.40 0.00
 17 9 16 9.52 0.00
 19 9 16 -2.95 0.00
 21 9 16 2.65 0.00
 16 10 16 -9.28 0.00
 18 10 16 -2.35 0.00
 20 10 16 -0.01 0.00
 17 11 16 -11.91 0.00
 19 11 16 -0.72 0.00
 21 11 16 -4.78 0.00
 16 12 16 6.34 0.00
 18 12 16 -0.11 0.00
 20 12 16 4.12 0.00
 17 13 16 4.57 0.00
 19 13 16 -1.48 0.00
 21 13 16 4.80 0.00
 16 14 16 -5.54 0.00
 18 14 16 -0.91 0.00
 20 14 16 -8.77 0.00
 15 15 16 -5.05 0.00
 17 15 16 -2.19 0.00
 19 15 16 3.53 0.00
 14 16 16 -2.02 0.00
 16 16 16 -2.61 0.00
 18 16 16 -3.56 0.00
 20 16 16 4.47 0.00
 15 17 16 -4.74 0.00
 17 17 16 -10.15 0.00
 19 17 16 -2.81 0.00
 14 18 16 2.87 0.00
 16 18 16 2.06 0.00
 18 18 16 -0.73 0.00
 13 19 16 -2.52 0.00
 15 19 16 -5.00 0.00
 17 19 16 4.94 0.00
 19 19 16 -4.91 0.00
 14 20 16 3.13 0.00
 16 20 16 -2.78 0.00
 18 20 16 -2.76 0.00
 13 21 16 -12.11 0.00
 15 21 16 -5.68 0.00
 17 21 16 -5.20 0.00
 12 22 16 -7.02 0.00
 14 22 16 0.06 0.00
 16 22 16 4.28 0.00
 18 22 16 0.91 0.00
 11 23 16 -14.54 0.00
 13 23 16 -5.91 0.00
 15 23 16 1.91 0.00
 17 23 16 -2.59 0.00
 10 24 16 -5.98 0.00
 12 24 16 -2.05 0.00
 14 24 16 -6.51 0.00
 16 24 16 -3.74 0.00
 9 25 16 9.47 0.00
 11 25 16 7.37 0.00
 13 25 16 -1.72 0.00
 15 25 16 0.83 0.00
 17 25 16 1.20 0.00
 8 26 16 3.48 0.00
 10 26 16 2.26 0.00
 12 26 16 -2.34 0.00
 14 26 16 -2.80 0.00
 16 26 16 -4.47 0.00
 7 27 16 -17.87 0.00
 9 27 16 -10.73 0.00
 11 27 16 -12.70 0.00
 13 27 16 1.43 0.00
 15 27 16 -6.86 0.00
 4 28 16 0.69 0.00
 6 28 16 6.67 0.00
 8 28 16 -1.91 0.00
 10 28 16 1.14 0.00
 12 28 16 2.18 0.00
 14 28 16 -0.44 0.00
 1 29 16 -11.68 0.00
 3 29 16 -4.24 0.00
 5 29 16 3.43 0.00
 7 29 16 11.56 0.00
 9 29 16 4.11 0.00
 11 29 16 9.09 0.00
 13 29 16 -1.79 0.00
 0 30 16 4.75 0.00
 2 30 16 2.53 0.00
 4 30 16 7.28 0.00
 6 30 16 3.94 0.00
 8 30 16 1.17 0.00
 10 30 16 2.19 0.00
 12 30 16 -7.40 0.00
 14 30 16 -2.50 0.00
 1 31 16 3.46 0.00
 3 31 16 2.51 0.00
 5 31 16 -1.79 0.00
 7 31 16 1.28 0.00
 9 31 16 -0.36 0.00
 11 31 16 0.63 0.00
 13 31 16 -0.67 0.00
 0 32 16 -2.84 0.00
 2 32 16 -1.77 0.00
 4 32 16 5.10 0.00
 6 32 16 -0.24 0.00
 8 32 16 11.81 0.00
 10 32 16 1.54 0.00
 12 32 16 7.43 0.00
 1 33 16 -7.96 0.00
 3 33 16 -8.62 0.00
 5 33 16 -5.78 0.00
 7 33 16 -11.61 0.00
 9 33 16 1.57 0.00
 11 33 16 -0.52 0.00
 0 34 16 3.06 0.00
 2 34 16 2.84 0.00
 4 34 16 -1.98 0.00
 6 34 16 10.79 0.00
 8 34 16 -0.13 0.00
 10 34 16 5.63 0.00
 1 35 16 -9.13 0.00
 3 35 16 -4.74 0.00
 5 35 16 1.05 0.00
 7 35 16 4.50 0.00
 9 35 16 -0.64 0.00
 0 36 16 -2.99 0.00
 2 36 16 -0.82 0.00
 4 36 16 -0.62 0.00
 6 36 16 -5.01 0.00
 8 36 16 0.09 0.00
 1 37 16 5.68 0.00
 3 37 16 9.77 0.00
 5 37 16 3.05 0.00
 0 38 16 -0.56 0.00
 2 38 16 0.40 0.00
 15 1 17 2.59 0.00
 17 1 17 3.85 0.00
 19 1 17 3.43 0.00
 14 2 17 -2.24 0.00
 16 2 17 -1.47 0.00
 18 2 17 -2.29 0.00
 20 2 17 -0.60 0.00
 15 3 17 8.25 0.00
 17 3 17 4.33 0.00
 19 3 17 6.74 0.00
 16 4 17 2.37 0.00
 18 4 17 -0.08 0.00
 20 4 17 2.85 0.00
 15 5 17 -4.38 0.00
 17 5 17 10.61 0.00
 19 5 17 -0.66 0.00
 16 6 17 4.03 0.00
 18 6 17 0.12 0.00
 20 6 17 -1.32 0.00
 15 7 17 16.88 0.00
 17 7 17 -7.84 0.00
 19 7 17 7.45 0.00
 14 8 17 -9.34 0.00
 16 8 17 -9.63 0.00
 18 8 17 1.73 0.00
 20 8 17 -1.49 0.00
 15 9 17 -15.99 0.00
 17 9 17 8.65 0.00
 19 9 17 -10.93 0.00
 14 10 17 4.65 0.00
 16 10 17 3.89 0.00
 18 10 17 -5.84 0.00
 20 10 17 -2.04 0.00
 15 11 17 6.01 0.00
 17 11 17 -10.99 0.00
 19 11 17 7.07 0.00
 14 12 17 -5.72 0.00
 16 12 17 -4.75 0.00
 18 12 17 1.07 0.00
 13 13 17 7.32 0.00
 15 13 17 -13.31 0.00
 17 13 17 1.29 0.00
 19 13 17 -4.55 0.00
 14 14 17 -4.16 0.00
 16 14 17 0.76 0.00
 18 14 17 -0.36 0.00
 13 15 17 -12.79 0.00
 15 15 17 -7.86 0.00
 17 15 17 -8.17 0.00
 12 16 17 1.39 0.00
 14 16 17 -2.69 0.00
 16 16 17 -7.98 0.00
 18 16 17 -8.76 0.00
 11 17 17 -1.43 0.00
 13 17 17 -0.33 0.00
 15 17 17 -3.28 0.00
 17 17 17 0.35 0.00
 12 18 17 -4.92 0.00
 14 18 17 -0.37 0.00
 16 18 17 1.48 0.00
 18 18 17 4.36 0.00
 11 19 17 6.59 0.00
 13 19 17 2.75 0.00
 15 19 17 -0.39 0.00
 17 19 17 -1.09 0.00
 10 20 17 2.65 0.00
 12 20 17 8.70 0.00
 14 20 17 -1.38 0.00
 16 20 17 -0.21 0.00
 9 21 17 9.94 0.00
 11 21 17 -2.62 0.00
 13 21 17 0.98 0.00
 15 21 17 5.69 0.00
 8 22 17 20.79 0.00
 10 22 17 0.66 0.00
 12 22 17 4.58 0.00
 14 22 17 5.25 0.00
 16 22 17 0.01 0.00
 7 23 17 0.42 0.00
 9 23 17 -2.89 0.00
 11 23 17 7.74 0.00
 13 23 17 0.38 0.00
 15 23 17 -3.81 0.00
 6 24 17 -0.89 0.00
 8 24 17 -10.33 0.00
 10 24 17 8.17 0.00
 12 24 17 4.56 0.00
 14 24 17 1.80 0.00
 3 25 17 5.96 0.00
 5 25 17 7.80 0.00
 7 25 17 1.76 0.00
 9 25 17 6.47 0.00
 11 25 17 -1.30 0.00
 13 25 17 -2.60 0.00
 0 26 17 -20.09 0.00
 2 26 17 -23.30 0.00
 4 26 17 -0.61 0.00
 6 26 17 -4.36 0.00
 8 26 17 -0.32 0.00
 10 26 17 -5.19 0.00
 12 26 17 -3.77 0.00
 14 26 17 2.04 0.00
 1 27 17 19.10 0.00
 3 27 17 9.37 0.00
 5 27 17 -2.38 0.00
 7 27 17 -0.77 0.00
 9 27 17 -3.81 0.00
 11 27 17 -4.53 0.00
 13 27 17 1.63 0.00
 0 28 17 -19.23 0.00
 2 28 17 -7.86 0.00
 4 28 17 -3.70 0.00
 6 28 17 4.60 0.00
 8 28 17 9.20 0.00
 10 28 17 4.70 0.00
 12 28 17 2.00 0.00
 1 29 17 4.72 0.00
 3 29 17 2.42 0.00
 5 29 17 2.27 0.00
 7 29 17 5.18 0.00
 9 29 17 -0.35 0.00
 11 29 17 2.35 0.00
 0 30 17 9.91 0.00
 2 30 17 1.40 0.00
 4 30 17 -7.27 0.00
 6 30 17 -4.91 0.00
 8 30 17 -6.33 0.00
 10 30 17 -1.71 0.00
 1 31 17 -6.57 0.00
 3 31 17 -5.79 0.00
 5 31 17 -4.47 0.00
 7 31 17 -6.70 0.00
 9 31 17 2.59 0.00
 0 32 17 -5.34 0.00
 2 32 17 -3.67 0.00
 4 32 17 -3.95 0.00
 6 32 17 -5.84 0.00
 8 32 17 2.35 0.00
 1 33 17 -0.99 0.00
 3 33 17 -1.89 0.00
 5 33 17 -5.25 0.00
 7 33 17 -3.33 0.00
 0 34 17 3.81 0.00
 2 34 17 2.01 0.00
 4 34 17 1.49 0.00
 6 34 17 5.80 0.00
 1 35 17 0.31 0.00
 3 35 17 -0.77 0.00
 12 0 18 -7.51 0.00
 14 0 18 -22.57 0.00
 16 0 18 8.67 0.00
 18 0 18 -4.56 0.00
 13 1 18 0.27 0.00
 15 1 18 0.87 0.00
 17 1 18 -0.24 0.00
 19 1 18 -0.31 0.00
 12 2 18 0.39 0.00
 14 2 18 19.81 0.00
 16 2 18 -3.06 0.00
 18 2 18 1.34 0.00
 13 3 18 7.30 0.00
 15 3 18 -3.24 0.00
 17 3 18 -4.47 0.00
 12 4 18 12.49 0.00
 14 4 18 -15.36 0.00
 16 4 18 -5.79 0.00
 18 4 18 -0.05 0.00
 13 5 18 4.99 0.00
 15 5 18 5.35 0.00
 17 5 18 3.71 0.00
 12 6 18 -10.63 0.00
 14 6 18 11.58 0.00
 16 6 18 4.55 0.00
 18 6 18 -2.96 0.00
 13 7 18 -1.38 0.00
 15 7 18 7.91 0.00
 17 7 18 -3.44 0.00
 12 8 18 24.48 0.00
 14 8 18 2.17 0.00
 16 8 18 -1.62 0.00
 18 8 18 1.22 0.00
 11 9 18 16.05 0.00
 13 9 18 26.49 0.00
 15 9 18 7.56 0.00
 17 9 18 10.16 0.00
 12 10 18 -19.18 0.00
 14 10 18 7.72 0.00
 16 10 18 8.40 0.00
 18 10 18 -0.52 0.00
 11 11 18 -3.86 0.00
 13 11 18 -4.33 0.00
 15 11 18 1.24 0.00
 17 11 18 -2.67 0.00
 10 12 18 -8.26 0.00
 12 12 18 19.23 0.00
 14 12 18 2.03 0.00
 16 12 18 1.50 0.00
 11 13 18 7.43 0.00
 13 13 18 5.08 0.00
 15 13 18 6.09 0.00
 17 13 18 6.05 0.00
 10 14 18 -2.60 0.00
 12 14 18 -5.55 0.00
 14 14 18 1.10 0.00
 16 14 18 -0.50 0.00
 9 15 18 5.15 0.00
 11 15 18 2.22 0.00
 13 15 18 5.63 0.00
 15 15 18 -0.84 0.00
 8 16 18 -11.94 0.00
 10 16 18 0.95 0.00
 12 16 18 -5.52 0.00
 14 16 18 2.34 0.00
 16 16 18 -0.98 0.00
 9 17 18 5.96 0.00
 11 17 18 -0.07 0.00
 13 17 18 -3.27 0.00
 15 17 18 7.16 0.00
 8 18 18 3.54 0.00
 10 18 18 -6.10 0.00
 12 18 18 7.04 0.00
 14 18 18 -4.35 0.00
 7 19 18 1.38 0.00
 9 19 18 -5.68 0.00
 11 19 18 4.58 0.00
 13 19 18 5.10 0.00
 15 19 18 0.36 0.00
 4 20 18 -0.86 0.00
 6 20 18 -0.65 0.00
 8 20 18 -4.32 0.00
 10 20 18 -3.21 0.00
 12 20 18 -8.10 0.00
 14 20 18 0.69 0.00
 1 21 18 8.77 0.00
 3 21 18 0.01 0.00
 5 21 18 2.19 0.00
 7 21 18 4.32 0.00
 9 21 18 12.92 0.00
 11 21 18 0.35 0.00
 13 21 18 0.21 0.00
 0 22 18 3.85 0.00
 2 22 18 6.54 0.00
 4 22 18 0.43 0.00
 6 22 18 -7.55 0.00
 8 22 18 -12.10 0.00
 10 22 18 -8.09 0.00
 12 22 18 -3.01 0.00
 14 22 18 -2.51 0.00
 1 23 18 3.88 0.00
 3 23 18 1.36 0.00
 5 23 18 -11.78 0.00
 7 23 18 -15.97 0.00
 9 23 18 -10.92 0.00
 11 23 18 2.12 0.00
 13 23 18 -0.97 0.00
 0 24 18 -10.25 0.00
 2 24 18 -10.48 0.00
 4 24 18 -1.28 0.00
 6 24 18 3.53 0.00
 8 24 18 -1.24 0.00
 10 24 18 -2.58 0.00
 12 24 18 -0.76 0.00
 1 25 18 -8.67 0.00
 3 25 18 -2.93 0.00
 5 25 18 2.40 0.00
 7 25 18 5.64 0.00
 9 25 18 2.14 0.00
 11 25 18 1.47 0.00
 0 26 18 1.85 0.00
 2 26 18 -0.74 0.00
 4 26 18 -4.49 0.00
 6 26 18 -4.57 0.00
 8 26 18 -1.62 0.00
 10 26 18 2.55 0.00
 1 27 18 8.29 0.00
 3 27 18 -0.97 0.00
 5 27 18 -4.47 0.00
 7 27 18 -4.83 0.00
 9 27 18 -0.79 0.00
 0 28 18 -9.05 0.00
 2 28 18 -6.36 0.00
 4 28 18 -0.52 0.00
 6 28 18 1.23 0.00
 8 28 18 7.86 0.00
 1 29 18 2.40 0.00
 3 29 18 1.37 0.00
 5 29 18 -0.39 0.00
 7 29 18 -2.42 0.00
 0 30 18 -0.85 0.00
 2 30 18 -4.16 0.00
 4 30 18 -8.82 0.00
 6 30 18 0.73 0.00
 1 31 18 -1.36 0.00
 3 31 18 2.03 0.00
 5 31 18 3.16 0.00
 0 32 18 1.76 0.00
 2 32 18 2.36 0.00
 4 32 18 1.69 0.00
 1 1 19 -2.93 0.00
 9 1 19 -2.90 0.00
 11 1 19 -3.93 0.00
 13 1 19 -4.16 0.00
 15 1 19 8.56 0.00
 0 2 19 -3.96 0.00
 8 2 19 -13.18 0.00
 10 2 19 5.67 0.00
 12 2 19 -5.16 0.00
 14 2 19 -0.82 0.00
 16 2 19 -4.91 0.00
 1 3 19 19.37 0.00
 9 3 19 -0.82 0.00
 11 3 19 7.27 0.00
 13 3 19 -5.98 0.00
 15 3 19 -8.07 0.00
 0 4 19 -20.64 0.00
 8 4 19 3.23 0.00
 10 4 19 -14.34 0.00
 12 4 19 4.86 0.00
 14 4 19 -2.67 0.00
 16 4 19 4.51 0.00
 9 5 19 12.69 0.00
 11 5 19 -14.98 0.00
 13 5 19 -5.65 0.00
 15 5 19 0.50 0.00
 8 6 19 -10.35 0.00
 10 6 19 5.73 0.00
 12 6 19 -2.78 0.00
 14 6 19 5.14 0.00
 16 6 19 0.76 0.00
 9 7 19 -10.13 0.00
 11 7 19 8.07 0.00
 13 7 19 -2.53 0.00
 15 7 19 -11.68 0.00
 8 8 19 -0.93 0.00
 10 8 19 -6.46 0.00
 12 8 19 3.85 0.00
 14 8 19 2.41 0.00
 16 8 19 0.20 0.00
 7 9 19 16.80 0.00
 9 9 19 25.31 0.00
 11 9 19 1.33 0.00
 13 9 19 -3.60 0.00
 15 9 19 4.91 0.00
 8 10 19 1.81 0.00
 10 10 19 3.25 0.00
 12 10 19 -3.80 0.00
 14 10 19 -2.22 0.00
 7 11 19 1.86 0.00
 9 11 19 -3.36 0.00
 11 11 19 7.53 0.00
 13 11 19 11.75 0.00
 15 11 19 -4.49 0.00
 6 12 19 2.33 0.00
 8 12 19 -4.84 0.00
 10 12 19 2.25 0.00
 12 12 19 10.81 0.00
 14 12 19 5.19 0.00
 1 13 19 -7.66 0.00
 3 13 19 3.30 0.00
 5 13 19 10.32 0.00
 7 13 19 6.95 0.00
 9 13 19 10.25 0.00
 11 13 19 7.68 0.00
 13 13 19 -3.76 0.00
 15 13 19 8.96 0.00
 0 14 19 -1.33 0.00
 2 14 19 -11.24 0.00
 4 14 19 10.41 0.00
 6 14 19 -3.37 0.00
 8 14 19 9.22 0.00
 10 14 19 3.41 0.00
 12 14 19 4.51 0.00
 14 14 19 4.77 0.00
 1 15 19 7.27 0.00
 3 15 19 4.24 0.00
 5 15 19 0.41 0.00
 7 15 19 2.66 0.00
 9 15 19 2.52 0.00
 11 15 19 -2.53 0.00
 13 15 19 3.46 0.00
 0 16 19 3.04 0.00
 2 16 19 6.04 0.00
 4 16 19 -10.62 0.00
 6 16 19 2.78 0.00
 8 16 19 -6.86 0.00
 10 16 19 4.10 0.00
 12 16 19 3.70 0.00
 14 16 19 1.36 0.00
 1 17 19 -2.20 0.00
 3 17 19 -4.21 0.00
 5 17 19 -0.94 0.00
 7 17 19 3.23 0.00
 9 17 19 1.30 0.00
 11 17 19 5.91 0.00
 13 17 19 3.57 0.00
 0 18 19 -8.67 0.00
 2 18 19 -6.88 0.00
 4 18 19 -0.50 0.00
 6 18 19 -1.97 0.00
 8 18 19 -0.25 0.00
 10 18 19 -7.57 0.00
 12 18 19 -1.12 0.00
 1 19 19 3.87 0.00
 3 19 19 4.30 0.00
 5 19 19 0.24 0.00
 7 19 19 -4.46 0.00
 9 19 19 -0.12 0.00
 11 19 19 -2.33 0.00
 0 20 19 1.65 0.00
 2 20 19 -0.91 0.00
 4 20 19 5.23 0.00
 6 20 19 3.24 0.00
 8 20 19 6.62 0.00
 10 20 19 2.62 0.00
 12 20 19 -6.09 0.00
 1 21 19 3.15 0.00
 3 21 19 2.41 0.00
 5 21 19 1.49 0.00
 7 21 19 -1.02 0.00
 9 21 19 -5.09 0.00
 11 21 19 -0.03 0.00
 0 22 19 -7.50 0.00
 2 22 19 -3.56 0.00
 4 22 19 -4.81 0.00
 6 22 19 2.35 0.00
 8 22 19 -7.21 0.00
 10 22 19 -3.52 0.00
 1 23 19 -3.86 0.00
 3 23 19 2.85 0.00
 5 23 19 1.30 0.00
 7 23 19 1.34 0.00
 9 23 19 3.79 0.00
 0 24 19 -8.60 0.00
 2 24 19 -7.48 0.00
 4 24 19 0.28 0.00
 6 24 19 -1.68 0.00
 8 24 19 8.74 0.00
 1 25 19 4.65 0.00
 3 25 19 0.47 0.00
 5 25 19 -0.38 0.00
 7 25 19 -1.18 0.00
 0 26 19 9.62 0.00
 2 26 19 4.39 0.00
 4 26 19 -8.26 0.00
 6 26 19 -5.04 0.00
 1 27 19 -3.29 0.00
 3 27 19 0.06 0.00
 5 27 19 2.46 0.00
 0 28 19 -1.37 0.00
 2 28 19 -2.70 0.00
 4 28 19 -0.76 0.00
 1 29 19 -1.48 0.00
 0 0 0 0.00 0.00
# SQUEEZE RESULTS (Version = 150216)
# Note: Data are Listed for all Voids in the P1 Unit Cell
# i.e. Centre of Gravity, Solvent Accessible Volume,
# Recovered number of Electrons in the Void and
# Details about the Squeezed Material
;
loop_
  _platon_missing_refln_index_h
  _platon_missing_refln_index_k
  _platon_missing_refln_index_l
  _platon_missing_refln_theta
 10 0 0 18.351
 12 0 0 22.198
 1 1 0 2.086
 0 2 0 2.095
 1 3 0 3.626
 0 4 0 4.194
 1 5 0 5.548
 2 8 0 9.163
 0 4 1 4.925

_platon_squeeze_details
;
TITL 1 in Cmcm
CELL   24.4853   42.1654   17.1403     90.00     90.00     90.00
SPGR Cmcm
# Solvent Accessible Volume =      9445
# Electrons Found in S.A.V. =      2260
# Note: Atoms in Void as Cxxx and Qxxx all others
C101 1.000 0.187 0.029 !       3.41 eA-3
C102 1.000 0.313 0.433 !       2.39 eA-3
C103 0.313 0.141 0.251 !       2.14 eA-3
C104 0.304 0.320 0.243 !       2.11 eA-3
C105 0.307 0.203 0.247 !       2.05 eA-3
C106 1.000 0.342 0.397 !       1.98 eA-3
C107 0.290 0.359 0.252 !       1.92 eA-3
C108 0.955 0.291 0.076 !       1.91 eA-3
C109 1.000 0.296 0.036 !       1.90 eA-3
C110 0.500 0.034 0.005 !       1.65 eA-3
C111 0.412 0.055 0.263 !       1.36 eA-3
Q112 0.500 0.198 0.460 !       1.36 eA-3
C113 0.022 0.173 0.415 !       1.35 eA-3
Q114 0.649 0.195 0.252 !       1.31 eA-3
C115 0.572 0.437 0.254 !       1.31 eA-3
C116 1.000 0.467 0.145 !       1.31 eA-3
C117 1.000 0.141 0.406 !       1.30 eA-3
C118 0.553 0.016 0.250 !       1.29 eA-3
C119 0.721 0.303 0.209 !       1.27 eA-3
Q120 0.275 0.304 0.324 !       1.26 eA-3
C121 0.390 0.453 0.231 !       1.21 eA-3
C122 0.008 0.013-0.003 !       1.19 eA-3
C123 0.500 0.478 0.446 !       1.17 eA-3
C124 0.875 0.359 0.248 !       1.16 eA-3
C125 0.271 0.211 0.098 !       1.16 eA-3
C126 0.229 0.289 0.902 !       1.16 eA-3
C127 0.548 0.414 0.235 !       1.15 eA-3
C128 1.000 0.155 0.441 !       1.14 eA-3
Q129 0.914 0.221 0.412 !       1.13 eA-3
Q130 0.900 0.241 0.034 !       1.13 eA-3
Q131 0.571 0.313 0.139 !       1.11 eA-3
C132 0.939 0.201 0.096 !       1.09 eA-3
C133 1.000 0.477 0.258 !       1.07 eA-3
C134 1.000 0.329 0.155 !       1.02 eA-3
C135 0.547 0.484 0.247 !       1.01 eA-3
C136 1.000 0.078 0.034 !       1.01 eA-3
C137 0.117 0.133 0.243 !       1.01 eA-3
C138 0.716 0.336 0.209 !       1.00 eA-3
Q139 0.500 0.315 0.450 !       1.00 eA-3
Q140 0.508 0.164 0.222 !       0.98 eA-3
C141 1.000 0.450 0.153 !       0.97 eA-3
C142 0.158 0.309 0.181 !       0.97 eA-3
Q143 0.257 0.287 0.095 !       0.97 eA-3
C144 1.000 0.039 0.308 !       0.97 eA-3
Q145 0.646 0.312 0.256 !       0.96 eA-3
Q146 0.500 0.227 0.244 !       0.95 eA-3
C147 1.000 0.023 0.248 !       0.95 eA-3
C148 0.462 0.493 0.204 !       0.95 eA-3
C149 1.000 0.066 0.420 !       0.94 eA-3
C150 0.484 0.505 0.443 !       0.94 eA-3
C151 0.484 0.496 0.036 !       0.94 eA-3
C152 0.428 0.452 0.305 !       0.94 eA-3
C153 0.757 0.203 0.384 !       0.93 eA-3
Q154 0.258 0.221 0.330 !       0.93 eA-3
Q155 0.500 0.336 0.258 !       0.93 eA-3
C156 0.130 0.317 0.276 !       0.92 eA-3
C157 1.000 0.039 0.016 !       0.92 eA-3
C158 0.423 0.414 0.272 !       0.92 eA-3
C159 0.741 0.234 0.247 !       0.92 eA-3
C160 1.000 0.464 0.217 !       0.91 eA-3
C161 1.000 0.458 0.310 !       0.91 eA-3
C162 0.630 0.176 0.786 !       0.91 eA-3
C163 1.000 0.449 0.048 !       0.90 eA-3
C164 0.896 0.149 0.248 !       0.90 eA-3
C165 0.711 0.170 0.194 !       0.90 eA-3
C166 0.423 0.465 0.290 !       0.90 eA-3
C167 0.969 0.487 0.283 !       0.90 eA-3
C168 1.000 0.041 0.399 !       0.90 eA-3
Q169 0.500 0.367 0.248 !       0.88 eA-3
C170 1.000 0.006 0.203 !       0.87 eA-3
C171 0.437 0.044 0.309 !       0.87 eA-3
C172 1.000 0.430 0.154 !       0.87 eA-3
C173 1.000 0.492 0.292 !       0.87 eA-3
C174 0.500 0.492 0.254 !       0.87 eA-3
C175 0.718 0.206 0.207 !       0.86 eA-3
C176 1.000 0.150 0.343 !       0.85 eA-3
C177 1.000 0.147 0.187 !       0.85 eA-3
C178 1.000 0.060 0.165 !       0.85 eA-3
C179 1.000 0.006 0.411 !       0.85 eA-3
C180 0.955 0.157 0.381 !       0.83 eA-3
C181 1.000 0.430 0.240 !       0.83 eA-3
C182 0.126 0.660 0.783 !       0.83 eA-3
C183 0.961 0.008 0.249 !       0.83 eA-3
C184 0.476 0.436 0.318 !       0.83 eA-3
C185 0.564 0.039 0.245 !       0.83 eA-3
C186 1.000 0.049 0.457 !       0.82 eA-3
C187 1.000 0.445 0.262 !       0.82 eA-3
C188 0.133 0.181 0.284 !       0.82 eA-3
C189 1.000 0.051 0.144 !       0.81 eA-3
C190 0.764 0.210 0.080 !       0.80 eA-3
Q191 0.107 0.237 0.108 !       0.80 eA-3
C192 0.164 0.192 0.316 !       0.79 eA-3
Q193 1.000 0.233 0.057 !       0.79 eA-3
Q194 0.025 0.266 0.451 !       0.79 eA-3
C195 0.831 0.217 0.195 !       0.79 eA-3
C196 0.500 0.445 0.144 !       0.79 eA-3
C197 0.086 0.272 0.388 !       0.79 eA-3
Q198 0.697 0.233 0.333 !       0.78 eA-3
C199 1.000 0.172 0.244 !       0.78 eA-3
;
loop_
  _platon_squeeze_void_nr
  _platon_squeeze_void_average_x
  _platon_squeeze_void_average_y
  _platon_squeeze_void_average_z
  _platon_squeeze_void_volume
  _platon_squeeze_void_count_electrons
  _platon_squeeze_void_content
 1 -0.011 -0.004 -0.006 9431 2263 ' '

_platon_squeeze_void_probe_radius 1.20
loop_
  _refln_index_h
  _refln_index_k
  _refln_index_l
  _refln_F_squared_meas
  _refln_F_squared_sigma
 0 0 -2 94.18 1.71
 0 0 -3 0.01 0.22
 0 0 -4 71.84 2.14
 0 0 -5 0.04 0.36
 0 0 -6 19.71 1.43
 0 0 -7 0.42 0.41
 0 0 -8 179.99 4.77
 0 0 9 2.12 0.66
 0 0 -9 0.87 0.61
 0 0 10 274.69 4.66
 0 0 11 0.66 0.55
 0 0 12 110.32 3.32
 0 0 13 -0.37 0.67
 0 0 14 -0.81 0.71
 0 0 -15 -0.15 0.44
 0 0 15 -0.59 0.62
 0 0 16 1.36 0.72
 0 0 -16 -0.23 0.43
 0 0 17 2.82 0.85
 0 0 18 21.26 1.55
 0 -2 -1 14.72 0.69
 0 -2 -2 158.64 2.77
 0 2 -2 163.13 2.21
 0 2 -3 3.76 0.44
 0 -2 -3 3.16 0.51
 0 -2 -4 64.85 2.21
 0 2 -4 63.43 1.93
 0 -2 -5 1.07 0.56
 0 2 -5 1.14 0.46
 0 2 -6 10.29 0.98
 0 -2 -6 10.26 1.12
 0 2 -7 1.57 0.49
 0 -2 -7 1.41 0.51
 0 2 -8 322.21 6.25
 0 -2 -8 315.92 6.64
 0 -2 -9 3.96 0.94
 0 2 -9 4.11 0.87
 0 -2 9 5.65 0.79
 0 2 9 5.91 0.81
 0 2 10 201.7 3.97
 0 -2 10 199.15 3.92
 0 2 11 1.7 0.58
 0 -2 11 2.14 0.66
 0 -2 12 30.11 1.73
 0 2 12 31.53 1.79
 0 -2 13 -0.53 0.7
 0 2 13 -0.22 0.64
 0 2 14 1.21 0.59
 0 -2 14 1.58 0.63
 0 -2 -14 1.51 0.51
 0 2 15 0.2 0.59
 0 2 -15 -0.19 0.46
 0 -2 15 -0.59 0.69
 0 2 -16 0.2 0.36
 0 -2 16 -0.33 0.55
 0 2 16 0.15 0.63
 0 2 17 2.11 0.79
 0 2 -17 0.88 0.41
 0 -2 17 1.05 0.66
 0 -2 18 28.22 1.79
 0 -4 -2 484.08 5.58
 0 -4 -3 0.01 0.34
 0 -4 -4 630.45 7.76
 0 -4 -5 5.33 0.87
 0 -4 -6 165.31 4.54
 0 -4 -7 0.71 0.53
 0 -4 -8 111.52 4.22
 0 -4 -9 14.04 1.67
 0 -4 9 14.42 1.13
 0 4 9 14.08 1.14
 0 -4 -10 100.15 4.35
 0 4 10 104.52 2.88
 0 -4 10 104.36 2.89
 0 -4 11 1.08 0.58
 0 4 11 -0.32 0.62
 0 4 12 4.83 0.78
 0 -4 12 5.06 0.78
 0 4 13 0.3 0.57
 0 -4 13 0.9 0.61
 0 -4 14 23.99 1.76
 0 4 14 29.2 1.87
 0 -4 15 1.2 0.71
 0 4 -15 0.67 0.51
 0 4 15 1.93 0.88
 0 4 -16 18.41 1.32
 0 -4 16 21.25 1.65
 0 4 16 20.97 1.63
 0 4 17 1.32 0.65
 0 -4 17 1.86 0.72
 0 4 -17 0.33 0.41
 0 -4 18 5.17 0.93
 0 4 -18 2.91 0.55
 0 6 0 66.86 1.25
 0 6 1 1.7 0.31
 0 6 2 122.19 2.66
 0 -6 -2 125.62 3.27
 0 -6 -3 2.39 0.64
 0 6 3 2.34 0.57
 0 -6 -4 162.6 4.44
 0 -6 -5 38 2.31
 0 -6 -6 172.41 5.01
 0 -6 -7 1.11 0.58
 0 -6 -8 28.55 2.3
 0 -6 -9 9.44 1.44
 0 6 9 9.12 0.89
 0 -6 9 10.92 1
 0 6 10 86.99 2.7
 0 -6 10 90.05 2.73
 0 -6 -10 88.22 4.3
 0 -6 11 0.48 0.5
 0 6 11 -0.24 0.52
 0 6 12 2.77 0.68
 0 -6 12 2.03 0.56
 0 6 13 4.3 0.83
 0 -6 13 4.72 0.87
 0 6 14 110.59 3.5
 0 -6 14 103.21 3.56
 0 6 -15 8.59 1.07
 0 6 15 10.43 1.36
 0 -6 15 7.44 1.16
 0 6 16 32.81 1.99
 0 -6 16 28.23 1.92
 0 6 -16 28.96 1.66
 0 6 17 2.27 0.75
 0 -6 17 1.37 0.81
 0 6 -17 0.08 0.37
 0 6 -18 13.85 1.05
 0 -6 18 14.89 1.31
 0 6 -19 0.36 0.27
 0 8 0 8.65 0.54
 0 8 1 3.92 0.47
 0 8 2 185.32 3.45
 0 8 3 50.9 2.14
 0 -8 -3 51.68 2.54
 0 -8 -4 42.69 2.54
 0 8 4 42.85 2.26
 0 -8 -5 30.64 2.27
 0 -8 -6 436.12 8.53
 0 -8 -7 12.01 1.56
 0 -8 -8 3.04 0.89
 0 -8 9 1.44 0.55
 0 8 9 0.17 0.41
 0 -8 -9 0.94 0.6
 0 8 10 40.02 1.85
 0 -8 -10 42.71 3.15
 0 -8 10 39.78 1.87
 0 -8 11 3.82 0.78
 0 8 11 2.7 0.65
 0 -8 12 9.27 1.06
 0 8 12 8.71 1.03
 0 -8 13 13.67 1.43
 0 8 13 19.3 1.5
 0 8 14 131.24 3.76
 0 -8 14 121.89 3.86
 0 8 -15 15.8 1.41
 0 8 15 19.46 1.61
 0 8 16 72.39 2.91
 0 8 -16 70.94 2.6
 0 -8 16 70.58 2.95
 0 -8 17 1.27 0.72
 0 8 -17 0.25 0.39
 0 -8 18 2.07 0.73
 0 8 -18 0.64 0.37
 0 8 -19 -0.28 0.3
 0 10 0 346.86 3.75
 0 10 1 0.8 0.32
 0 10 2 6.29 0.75
 0 -10 -3 26.36 1.97
 0 10 3 25.08 1.58
 0 10 4 368.8 6.52
 0 -10 -4 384.46 7.76
 0 -10 -5 58.78 3.34
 0 -10 -6 500.35 9.82
 0 -10 -7 73.05 3.95
 0 -10 8 28.94 1.47
 0 -10 -8 27.46 2.53
 0 -10 -9 10.61 1.62
 0 -10 9 9.36 0.96
 0 10 9 8.96 0.86
 0 -10 10 82.95 2.76
 0 -10 -10 85.78 4.8
 0 10 10 82.63 2.61
 0 -10 11 1.73 0.7
 0 10 11 1.84 0.59
 0 10 12 1.22 0.64
 0 -10 12 -1.06 0.85
 0 10 13 17.37 1.44
 0 -10 13 14.23 1.41
 0 10 14 87.93 3.1
 0 -10 14 83.6 3.25
 0 -10 15 20.33 1.73
 0 10 15 25.01 1.79
 0 10 -15 24.25 1.68
 0 10 -16 15.99 1.29
 0 -10 16 14.96 1.45
 0 -10 17 0.34 0.63
 0 10 -17 -0.17 0.47
 0 10 -18 0.21 0.38
 0 -10 18 1.51 0.63
 0 10 -19 -0.35 0.35
 0 12 0 178.61 2.98
 0 12 1 30.66 1.41
 0 12 2 0.5 0.42
 0 12 3 21.5 1.53
 0 -12 -3 22.55 1.96
 0 -12 -4 90.7 4.04
 0 12 4 87.42 3.29
 0 -12 -5 88.34 4.27
 0 -12 -6 449.97 9.9
 0 -12 -7 60.86 3.79
 0 -12 -8 10.1 1.73
 0 -12 8 8.95 0.89
 0 12 9 32.83 1.5
 0 -12 9 40.01 1.9
 0 12 9 36.49 1.64
 0 -12 -9 40.78 3.34
 0 12 10 41.31 1.85
 0 -12 -10 43.63 3.56
 0 -12 10 42.92 2.03
 0 -12 11 2.92 0.78
 0 12 11 2.35 0.64
 0 -12 12 -0.63 0.79
 0 12 12 0.51 0.61
 0 -12 13 -1.37 0.83
 0 12 13 1.49 0.72
 0 -12 14 56.92 2.77
 0 12 14 60.04 2.58
 0 -12 15 13.92 1.43
 0 12 -15 16.94 1.42
 0 -12 16 17.63 1.53
 0 12 -16 18.19 1.36
 0 -12 17 1.22 0.6
 0 12 -17 0.35 0.44
 0 -12 18 3.16 0.75
 0 12 -18 1.98 0.5
 0 12 -19 0.03 0.38
 0 14 0 205.03 3.46
 0 14 1 71.13 2.28
 0 14 -1 68.18 1.98
 0 14 2 13.23 1.11
 0 -14 -3 9.98 1.44
 0 14 3 8.94 1.05
 0 14 4 76.22 3.17
 0 -14 -4 80.33 4.04
 0 -14 -5 33.11 2.85
 0 -14 -6 375.42 9.46
 0 -14 -7 -0.18 0.64
 0 14 8 46.25 1.74
 0 -14 8 50.7 2.05
 0 14 9 27.21 1.44
 0 14 9 29.21 1.45
 0 -14 -9 34.9 3.26
 0 -14 9 33.84 1.8
 0 -14 10 89.11 2.94
 0 -14 -10 94.11 5.43
 0 14 10 85.87 2.62
 0 -14 11 7.94 1.06
 0 14 11 6.79 0.89
 0 -14 12 2.64 0.63
 0 14 12 3.25 0.75
 0 14 13 3.7 0.87
 0 -14 13 1.46 0.65
 0 -14 14 1.54 0.68
 0 -14 15 7.79 1.11
 0 14 -15 11.05 1.16
 0 -14 16 4.72 0.92
 0 14 -16 4.28 0.76
 0 14 -17 2.1 0.59
 0 -14 17 2.19 0.69
 0 -14 18 2.37 0.69
 0 14 -18 1.34 0.43
 0 16 0 108.95 2.74
 0 16 -1 59.1 1.96
 0 16 1 61.2 2.23
 0 16 2 57.29 2.36
 0 -16 -3 -0.17 0.6
 0 16 3 -0.12 0.46
 0 16 4 19.78 1.7
 0 -16 -4 19.22 2.12
 0 -16 -5 35.04 3.15
 0 -16 -6 0.57 0.8
 0 -16 -7 14.63 2.25
 0 16 7 12.99 0.95
 0 -16 -8 40.53 3.55
 0 16 8 38.37 1.64
 0 -16 8 34.34 1.74
 0 -16 -9 77.91 4.97
 0 -16 9 73.78 2.64
 0 16 9 70.69 2.37
 0 -16 -10 83.01 5.26
 0 16 10 78.54 2.55
 0 -16 10 82.26 2.86
 0 16 11 29.77 1.71
 0 -16 11 33.73 1.98
 0 -16 12 -0.41 0.72
 0 -16 13 -0.77 0.72
 0 16 -14 19.7 1.46
 0 -16 14 16.95 1.57
 0 -16 15 5.5 0.95
 0 16 -15 5.98 0.87
 0 16 -16 0.14 0.44
 0 -16 16 0.2 0.52
 0 -16 17 1.69 0.6
 0 16 -17 0.8 0.45
 0 16 -18 13.48 1.06
 0 18 0 229.14 4.22
 0 18 1 47.31 2.07
 0 18 -1 44.89 1.81
 0 18 2 1.61 0.53
 0 18 -2 1.07 0.35
 0 -18 -3 1.06 0.8
 0 18 3 1.53 0.61
 0 18 4 16.75 1.63
 0 -18 -4 16.67 2.14
 0 -18 -5 0.58 0.75
 0 18 5 0.25 0.3
 0 18 6 3.99 0.61
 0 -18 -6 4.97 1.57
 0 18 7 13.48 1.03
 0 -18 -7 15.61 2.3
 0 -18 -8 57.71 4.35
 0 18 8 58.45 2.11
 0 -18 -9 76.82 5.17
 0 -18 9 72.7 2.68
 0 18 9 77.87 2.57
 0 -18 10 92.81 3.14
 0 18 10 90.28 2.83
 0 -18 -10 83.02 5.49
 0 18 11 10.65 1.09
 0 -18 11 9.42 1.12
 0 -18 -11 10.33 2.15
 0 -18 12 10.89 1.25
 0 -18 13 1.22 0.64
 0 18 -14 4.48 0.85
 0 -18 14 3.72 0.84
 0 -18 15 4.11 0.96
 0 18 -15 5 0.79
 0 18 -16 3.49 0.72
 0 -18 16 3.27 0.82
 0 18 -17 4.6 0.72
 0 -18 17 4.11 0.8
 0 18 -18 11.83 0.98
 0 20 0 148.47 3.63
 0 20 -1 117.17 3.09
 0 20 1 124.98 3.51
 0 20 -2 0.19 0.25
 0 20 2 -0.27 0.47
 0 20 3 35.65 2.24
 0 -20 -3 41.09 3.39
 0 20 4 3.19 0.87
 0 -20 -4 1.82 0.94
 0 20 5 20.59 1.17
 0 -20 -5 22.39 2.68
 0 20 6 17.72 1.15
 0 -20 -6 17.8 2.45
 0 -20 -7 -0.19 0.91
 0 20 7 -0.19 0.37
 0 -20 -8 26.83 3.16
 0 20 8 27.72 1.56
 0 20 9 42.3 1.94
 0 -20 -9 42.3 4.03
 0 -20 -10 22.14 3.03
 0 20 10 24.36 1.58
 0 -20 10 22.56 1.61
 0 -20 11 34.35 2.04
 0 20 11 37.29 1.99
 0 -20 12 0.47 0.53
 0 -20 13 -0.62 0.61
 0 20 -13 0.2 0.62
 0 -20 14 7.16 1.11
 0 20 -14 8.29 1.07
 0 -20 15 19.14 1.6
 0 20 -15 20.71 1.48
 0 -20 16 1.74 0.64
 0 20 -16 1.5 0.52
 0 -20 17 1.79 0.6
 0 20 -17 0.97 0.41
 0 20 -18 7.83 0.8
 0 22 2 0.15 0.34
 0 -22 -2 -0.17 0.84
 0 22 3 72.7 3.28
 0 -22 -3 80.43 4.92
 0 -22 -4 172.64 7.27
 0 -22 -5 84.65 5.27
 0 22 5 73.47 2.28
 0 22 6 47.18 1.92
 0 -22 -6 50.04 4.23
 0 -22 -7 13.95 2.38
 0 22 7 15.31 1.15
 0 22 8 0.46 0.43
 0 -22 -8 1.81 1.19
 0 -22 -9 18.28 2.83
 0 22 9 18.83 1.37
 0 -22 -10 12.76 2.39
 0 22 10 14.71 1.32
 0 22 11 1.47 0.63
 0 22 12 5.64 0.85
 0 22 -12 7.32 0.98
 0 22 -13 8.44 1.08
 0 -22 13 6.73 1.02
 0 22 -14 19.01 1.48
 0 -22 14 16.34 1.43
 0 22 -15 24.7 1.6
 0 22 -16 7.05 0.91
 0 22 -17 0.34 0.4
 0 -24 -2 0.38 0.72
 0 -24 -3 105.55 5.96
 0 -24 -4 114.21 6.3
 0 -24 -5 327.75 10.94
 0 24 5 314.3 4.88
 0 24 6 42.8 1.92
 0 -24 -6 40.75 4.08
 0 24 7 58.23 2.28
 0 -24 -7 52.78 4.71
 0 -24 -8 0.23 0.96
 0 24 8 -0.01 0.49
 0 -24 -9 10.72 2.29
 0 24 9 15.11 1.28
 0 -24 -10 0.38 1.01
 0 24 10 -0.26 0.52
 0 24 -11 0.55 0.51
 0 24 11 -0.03 0.5
 0 24 12 4.53 0.79
 0 24 -12 4.25 0.78
 0 24 -13 7.51 0.95
 0 24 -14 25.54 1.67
 0 24 -15 35.48 1.83
 0 24 -16 6.5 0.83
 0 24 -17 5.34 0.69
 0 26 1 13.25 0.96
 0 -26 -1 15.61 2.51
 0 26 2 1 0.38
 0 -26 -2 0.65 0.77
 0 -26 -3 82.15 5.59
 0 -26 -4 55.73 4.68
 0 26 4 55.47 2.12
 0 -26 -5 249.04 10.1
 0 26 5 237 4.45
 0 26 6 64.44 2.48
 0 26 -6 55.36 2.08
 0 -26 -6 61.12 5.13
 0 26 7 20.71 1.44
 0 -26 -7 18.87 2.96
 0 26 -8 3.89 0.73
 0 -26 -8 2.08 1.01
 0 26 8 2.68 0.71
 0 26 -9 9.55 0.97
 0 26 9 9.39 1.05
 0 -26 -9 7.31 1.88
 0 -26 -10 3.22 1.62
 0 26 -10 3.15 0.66
 0 26 10 2.86 0.72
 0 26 11 0.21 0.49
 0 26 -11 0.1 0.49
 0 26 12 3.71 0.77
 0 26 -12 3.32 0.77
 0 26 -13 41.67 2.03
 0 26 -14 7.34 0.92
 0 26 -15 49.35 2.08
 0 26 -16 7.88 0.86
 0 28 1 9.6 0.88
 0 -28 -1 10.3 2.28
 0 -28 -2 -0.3 0.82
 0 -28 -3 47.3 4.52
 0 -28 -4 20.57 3.13
 0 28 4 19.84 1.4
 0 28 5 173.91 3.99
 0 -28 -5 165.98 8.69
 0 -28 -6 1.71 1.19
 0 28 6 3.83 0.78
 0 28 7 7.2 0.95
 0 28 -7 6 0.78
 0 -28 -7 5.38 1.69
 0 28 8 -0.19 0.52
 0 28 -8 0.61 0.48
 0 -28 -8 0.04 0.79
 0 28 9 42.56 2.17
 0 28 -9 40.79 1.95
 0 28 10 4.81 0.88
 0 28 -10 5.57 0.77
 0 28 -11 -0.02 0.4
 0 28 11 0.29 0.54
 0 28 12 1.05 0.66
 0 28 -12 0.49 0.47
 0 28 -13 33.14 1.74
 0 28 -14 15.24 1.24
 0 28 -15 31.47 1.6
 0 28 -16 2.96 0.54
 0 30 0 8.82 0.94
 0 -30 0 7.65 2.14
 0 30 1 44.49 1.89
 0 -30 -1 48.31 4.91
 0 -30 -2 0 0.85
 0 -30 -3 20.91 3.23
 0 30 4 11.13 1.13
 0 -30 -4 9.66 2.3
 0 30 5 5.95 0.88
 0 -30 -5 6.59 1.96
 0 30 6 0.35 0.5
 0 -30 -6 -0.83 1.06
 0 30 7 21.06 1.54
 0 -30 -7 15.63 2.97
 0 30 8 4.05 0.8
 0 -30 -8 2.46 1.21
 0 30 -9 62.2 2.35
 0 30 9 71.86 2.85
 0 30 10 7.42 1.06
 0 30 -10 7.05 0.92
 0 30 11 23.38 1.67
 0 30 -11 20.33 1.45
 0 30 -12 -0.04 0.4
 0 30 12 -0.07 0.41
 0 30 -13 14.28 1.15
 0 30 -14 5.25 0.74
 0 30 -15 28.72 1.48
 0 32 0 18.48 1.36
 0 -32 0 18.4 3.34
 0 -32 1 105.73 7.72
 0 -32 -1 101.9 7.48
 0 -32 -2 2.11 1.48
 0 -32 2 1.7 1.34
 0 32 3 1.13 0.7
 0 -32 -3 0.81 1.23
 0 32 4 1.03 0.63
 0 -32 -4 0.88 1.28
 0 -32 -5 2.85 1.6
 0 32 5 3.42 0.76
 0 32 6 8.96 1.19
 0 -32 -6 4.25 1.52
 0 32 7 -0.75 0.63
 0 32 8 2.88 0.72
 0 32 9 123.84 3.76
 0 32 10 12.67 1.33
 0 32 -11 42.63 1.9
 0 32 11 49.5 2.34
 0 32 12 0.33 0.42
 0 32 -12 1.45 0.5
 0 32 -13 0.55 0.4
 0 32 -14 0.29 0.32
 0 34 0 8.71 1.05
 0 -34 0 7.21 2.47
 0 -34 1 198.78 11.27
 0 -34 -1 188 10.81
 0 34 -1 194.52 4.2
 0 -34 -2 0.46 1.28
 0 -34 2 0.52 1.12
 0 34 3 81.53 2.92
 0 -34 -3 75.25 6.86
 0 -34 3 69.33 6.66
 0 -34 -4 -1.05 1.14
 0 34 4 -0.02 0.54
 0 -34 4 -0.78 1.41
 0 34 5 87.08 3.08
 0 34 6 -0.43 0.58
 0 34 7 -0.63 0.69
 0 34 8 3.07 0.78
 0 34 9 132.69 3.86
 0 34 10 9.45 1.2
 0 34 11 71.87 2.73
 0 34 12 1.38 0.54
 0 -36 0 6.85 2.72
 0 36 -1 147.71 3.75
 0 36 -2 7.34 1.02
 0 36 2 8.94 1.31
 0 36 3 1.55 0.67
 0 36 4 1.57 0.73
 0 36 5 19 1.56
 0 36 6 0.68 0.57
 0 36 7 3.02 0.71
 0 36 8 1.37 0.68
 0 36 9 78.02 2.97
 0 36 10 6.65 1.08
 0 36 11 50.51 2.22
 0 36 12 1.08 0.44
 0 38 1 194.13 4.65
 0 38 -2 -0.22 0.48
 0 38 2 0.73 0.72
 0 38 3 27.83 1.9
 0 38 -3 29.69 1.72
 0 38 4 2.44 0.79
 0 38 5 41.34 2.19
 0 38 6 0.68 0.55
 0 38 7 -1.23 0.67
 0 38 8 -0.25 0.5
 0 38 9 58.45 2.49
 0 38 10 1.91 0.65
 0 38 11 15.99 1.2
 0 40 0 9.14 1.27
 0 40 1 20.95 1.63
 0 40 -1 19.24 1.59
 0 40 2 1.19 0.67
 0 40 -3 33.24 1.78
 0 40 3 33.49 1.98
 0 40 -4 3.77 0.78
 0 40 4 3.55 0.86
 0 40 5 57.72 2.56
 0 40 -5 60.22 2.35
 0 40 6 1.24 0.59
 0 40 7 0.36 0.56
 0 40 8 0.25 0.44
 0 40 9 18.59 1.4
 0 40 10 0.15 0.37
 0 42 0 2.03 0.68
 0 42 1 4.91 0.89
 0 42 -1 5.6 0.91
 0 42 -2 1.15 0.58
 0 42 2 1.12 0.59
 0 42 3 38.12 2.05
 0 42 -3 37.12 2.05
 0 42 -4 6.92 1
 0 42 4 5.9 0.95
 0 42 -4 5.79 0.83
 0 42 -5 88.34 2.73
 0 42 -5 80.74 2.73
 0 42 5 89.04 3.04
 0 42 6 4.4 0.79
 0 42 -6 4.86 0.75
 0 42 7 5.37 0.84
 0 42 -7 4.15 0.67
 0 42 -8 0.54 0.41
 0 42 8 0.37 0.39
 0 42 9 2.48 0.53
 0 42 -9 2.83 0.5
 0 44 0 1.65 0.61
 0 44 1 3.76 0.79
 0 44 -1 2.34 0.65
 0 44 -2 0.16 0.46
 0 44 2 0.01 0.55
 0 44 3 27.27 1.67
 0 44 -3 27.34 1.66
 0 44 4 8.76 1.01
 0 44 -4 7.73 0.95
 0 44 -5 57.62 2.19
 0 44 5 73.17 2.61
 0 44 -6 5.36 0.7
 0 44 6 8.35 0.96
 0 44 7 19.75 1.34
 0 44 -7 13.28 0.97
 0 44 8 -0.31 0.38
 0 46 0 4.7 0.8
 0 46 -1 11.71 1.11
 0 46 1 12.52 1.14
 0 46 2 -0.5 0.47
 0 46 -2 0.17 0.41
 0 46 3 6.59 0.84
 0 46 -3 6.45 0.8
 0 46 -4 3.78 0.63
 0 46 4 3.3 0.62
 0 46 5 37.64 1.79
 0 46 6 7.01 0.83
 0 48 0 7.56 0.84
 0 48 -1 15.66 1.15
 0 48 1 16.62 1.19
 0 48 2 1.21 0.42
 0 48 3 -0.4 0.4
 -1 1 -1 1000 5.08
 1 -1 -2 0.34 0.18
 1 1 -2 0.23 0.11
 -1 -1 -2 0.46 0.24
 -1 1 -2 0.31 0.19
 1 1 -3 1.02 0.24
 -1 -1 -3 0.65 0.33
 -1 1 -3 0.71 0.3
 1 -1 -3 0.75 0.28
 -1 1 -4 0.1 0.36
 1 -1 -4 0.17 0.28
 -1 -1 -4 0.13 0.34
 1 1 -4 0.08 0.27
 1 -1 -5 122.09 3.04
 -1 -1 -5 127.96 3.49
 1 1 -5 120.87 2.73
 -1 1 -5 123.11 3.29
 -1 -1 -6 0.26 0.41
 1 1 -6 0.36 0.33
 1 -1 -6 0.43 0.36
 -1 1 -6 0.59 0.4
 1 -1 -7 29.91 1.8
 -1 1 -7 32.76 2.02
 1 1 -7 32.44 1.74
 -1 -1 -7 32.49 2.07
 -1 -1 -8 1.68 0.68
 1 -1 -8 1.38 0.54
 -1 1 -8 2.4 0.73
 1 1 -8 1.19 0.48
 1 -1 -9 294.45 6.24
 -1 -1 9 311.44 4.61
 -1 -1 -9 312.81 7.2
 1 -1 9 318.65 4.69
 1 1 9 317.74 4.7
 -1 1 9 315.62 4.63
 -1 1 -9 315.39 7.05
 -1 1 -10 0.97 0.72
 -1 -1 10 2.58 0.67
 1 -1 10 1.54 0.61
 1 1 10 1.43 0.58
 -1 1 10 1.81 0.65
 -1 -1 -10 0.73 0.52
 -1 -1 11 139.84 3.48
 1 1 11 142.03 3.56
 -1 1 11 141.3 3.48
 1 -1 11 141.61 3.55
 -1 1 12 0.18 0.49
 -1 -1 12 -0.25 0.61
 1 1 12 0.42 0.52
 1 -1 12 0.74 0.59
 -1 1 13 7.84 0.99
 1 1 13 8.22 1.02
 1 -1 13 8.35 1.07
 -1 -1 13 7.93 0.98
 1 1 14 0.37 0.62
 -1 -1 -14 -0.2 0.46
 -1 1 14 -1.63 0.78
 1 -1 14 -0.54 0.67
 -1 -1 14 -1.14 0.74
 -1 1 -14 -0.3 0.46
 1 1 15 0.73 0.71
 -1 1 -15 0.42 0.38
 -1 -1 15 0.08 0.65
 -1 1 15 -0.26 0.56
 1 -1 15 0.68 0.6
 -1 -1 -15 0.29 0.41
 1 -1 -15 0.01 0.42
 -1 1 -16 -0.36 0.38
 1 1 -16 0.24 0.44
 1 -1 16 0.81 0.68
 1 1 16 0.59 0.65
 -1 -1 16 -0.71 0.56
 -1 1 16 0.22 0.55
 1 -1 17 12.83 1.37
 1 1 -17 9.55 0.93
 -1 -1 17 11.87 1.26
 1 1 17 12.95 1.33
 -1 1 17 12.65 1.3
 -1 -1 18 2.76 0.82
 -1 1 18 2.74 0.76
 -1 -3 -1 514.67 4.96
 -1 -3 -2 3.32 0.51
 1 -3 -2 3.4 0.48
 -1 3 -3 38.84 1.48
 1 -3 -3 37.93 1.63
 -1 -3 -3 35.85 1.7
 -1 3 -4 5 0.66
 -1 -3 -4 4.81 0.77
 1 -3 -4 4.62 0.73
 1 3 -5 292.19 4.24
 1 -3 -5 279.92 5.14
 -1 -3 -5 285.91 5.61
 -1 3 -5 282.99 4.91
 1 -3 -6 3.8 0.75
 -1 3 -6 4.39 0.78
 -1 -3 -6 4.16 0.84
 1 -3 -7 10.2 1.17
 -1 -3 -7 11.01 1.31
 -1 3 -7 10.75 1.17
 -1 3 -8 6.91 1.02
 -1 -3 -8 7.19 1.2
 1 -3 -8 6.23 0.98
 1 -3 9 277.39 4.47
 -1 -3 9 274.36 4.35
 1 -3 -9 263 6.23
 -1 -3 -9 274.36 7.03
 -1 3 9 274.14 4.3
 1 3 9 279.37 4.47
 1 -3 10 2.34 0.66
 -1 -3 10 3.01 0.65
 1 3 10 2.65 0.59
 -1 -3 -10 2.57 0.8
 -1 3 10 3.73 0.73
 -1 -3 11 55.39 2.2
 1 3 11 55.54 2.24
 -1 3 11 56.13 2.21
 1 -3 11 58.6 2.32
 1 -3 12 -0.52 0.63
 -1 3 12 -0.84 0.66
 1 3 12 -0.42 0.59
 -1 -3 12 0.26 0.51
 1 3 13 -0.31 0.59
 -1 3 13 -0.42 0.67
 -1 -3 -13 -0.01 0.34
 1 -3 13 0.16 0.64
 -1 -3 13 -1.71 0.81
 -1 -3 14 -0.3 0.71
 1 3 14 0.89 0.65
 -1 3 -14 0.26 0.51
 1 -3 14 -0.35 0.67
 -1 3 14 -0.51 0.62
 1 3 15 11.61 1.27
 1 -3 15 10.97 1.28
 -1 3 15 13.58 1.33
 -1 3 -15 11.67 1.11
 -1 -3 15 10.12 1.23
 -1 -3 16 -0.06 0.58
 1 3 -16 -0.82 0.53
 1 3 16 0.62 0.73
 -1 3 -16 -0.14 0.37
 -1 3 16 0.6 0.61
 1 -3 16 0.69 0.69
 1 3 17 4.05 0.91
 -1 3 -17 3.16 0.6
 -1 3 17 3.34 0.81
 -1 -3 17 4.17 0.91
 1 3 -17 2.81 0.58
 1 -3 17 4.76 0.98
 1 -3 18 2.05 0.69
 -1 3 18 2.76 0.77
 1 3 -18 0.68 0.35
 -1 -3 18 1.64 0.7
 -1 -5 -1 35.77 1.53
 1 5 1 35.55 1.08
 -1 -5 -2 0.58 0.43
 1 -5 -3 13.5 1.17
 -1 -5 -3 13.57 1.2
 1 -5 -4 10.13 1.13
 -1 -5 -4 9.42 1.16
 -1 -5 -5 159.51 4.51
 1 -5 -5 169.01 4.46
 1 -5 -6 8.34 1.13
 -1 -5 -6 7.93 1.15
 -1 -5 -7 6.8 1.12
 1 -5 -7 7.25 1.09
 1 -5 -8 7.66 1.19
 -1 -5 -8 7.49 1.32
 1 5 9 175.17 3.55
 1 -5 -9 165.87 5.28
 -1 -5 -9 164.75 5.68
 -1 5 9 173.24 3.45
 -1 -5 9 174.44 3.51
 1 -5 9 169.26 3.59
 1 5 10 4.14 0.69
 -1 5 10 4.45 0.68
 1 -5 10 5.01 0.79
 -1 -5 -10 4.51 1.07
 -1 -5 10 4.98 0.7
 1 5 11 3.27 0.63
 1 -5 11 3.52 0.65
 -1 5 11 3.24 0.57
 -1 -5 11 3.85 0.76
 1 5 12 0.11 0.55
 1 -5 12 1.34 0.54
 -1 5 12 0.46 0.56
 1 -5 13 18.33 1.54
 -1 -5 13 17.25 1.45
 1 5 13 19.94 1.5
 -1 5 13 18.69 1.45
 -1 5 14 1.21 0.59
 1 -5 14 1.99 0.78
 -1 -5 14 1.72 0.66
 -1 5 -15 55.35 2.26
 1 -5 15 52.34 2.59
 1 5 15 59.79 2.62
 -1 5 15 60.77 2.63
 -1 -5 15 53.15 2.59
 -1 -5 16 0.12 0.62
 1 -5 16 1.67 0.79
 -1 5 16 2.97 0.85
 1 5 16 2.06 0.84
 1 5 -16 0.87 0.44
 -1 5 -16 1.03 0.55
 -1 -5 17 1.41 0.7
 -1 5 -17 0.58 0.42
 1 5 -17 -0.13 0.38
 1 -5 17 0.72 0.66
 -1 5 17 1.38 0.65
 -1 -5 18 1.29 0.62
 1 5 -18 1.14 0.42
 1 -5 18 2.15 0.78
 -1 5 -18 0.42 0.36
 -1 -5 19 13.04 1.13
 1 7 0 2.58 0.25
 -1 7 1 7.21 0.62
 1 7 1 7.63 0.57
 1 7 2 10.4 0.87
 -1 -7 -2 10.99 1.13
 -1 7 2 9.82 0.85
 -1 7 3 219.49 4.28
 -1 -7 -3 231.85 5.22
 1 -7 -3 233.52 4.93
 1 -7 -4 1.71 0.76
 -1 7 4 1.73 0.74
 -1 -7 -4 1.46 0.78
 -1 -7 -5 201.26 5.47
 -1 7 5 204.85 5.21
 1 -7 -5 219.29 5.58
 1 -7 -6 28.82 2.2
 -1 -7 -6 28.75 2.21
 1 -7 -7 78.3 3.62
 -1 -7 -7 81.69 3.86
 1 -7 -8 2.52 0.76
 -1 -7 -8 3.26 0.99
 -1 -7 9 29.02 1.51
 -1 -7 -9 26.89 2.48
 -1 7 9 29.16 1.46
 1 7 9 28.16 1.45
 1 -7 9 29.92 1.56
 1 -7 -9 28.31 2.4
 -1 7 10 2.92 0.53
 -1 -7 10 3.74 0.71
 1 7 10 3.41 0.64
 1 -7 10 4.01 0.74
 -1 -7 -10 3.36 1.06
 -1 7 10 2.79 0.52
 -1 7 11 10.43 1.03
 -1 -7 11 11.19 1.19
 1 -7 11 10.29 1.04
 -1 -7 -11 9.89 1.65
 1 7 11 10.63 1.04
 -1 7 12 3.47 0.74
 -1 -7 12 4.06 0.84
 1 -7 12 3.58 0.77
 1 7 12 3.85 0.76
 -1 7 13 63.34 2.57
 -1 -7 13 60.3 2.61
 1 7 13 65.19 2.61
 1 -7 13 64.71 2.74
 -1 7 14 12.96 1.32
 1 7 14 14.44 1.44
 1 -7 14 12.2 1.38
 -1 -7 14 10.1 1.25
 1 -7 15 101.25 3.53
 -1 -7 15 97.66 3.48
 -1 7 -15 96.27 3.02
 -1 7 15 97.66 3.35
 1 7 15 100.91 3.38
 -1 7 -16 3.12 0.71
 -1 7 16 4.01 0.92
 1 -7 16 4.12 0.93
 -1 -7 16 3.62 0.93
 1 7 -16 3.57 0.75
 1 7 16 5.19 1.12
 -1 7 -17 1.21 0.53
 -1 7 17 3.02 0.77
 1 7 -17 1.51 0.54
 1 -7 17 2.61 0.81
 -1 -7 17 2.62 0.78
 -1 -7 18 1.84 0.69
 -1 7 -18 -0.06 0.36
 1 7 -18 0.46 0.38
 1 -7 18 1.46 0.64
 1 7 -19 0.88 0.31
 -1 7 -19 0.96 0.34
 -1 9 0 9.14 0.7
 1 9 0 9.74 0.54
 -1 9 1 3.67 0.51
 1 9 1 4.14 0.5
 1 9 2 7.64 0.82
 -1 9 2 7.58 0.82
 -1 -9 -2 7.4 1.05
 1 9 3 173.22 4
 -1 9 3 165.59 3.87
 -1 -9 -3 186.27 4.94
 1 -9 -3 182.59 4.72
 1 -9 -4 36.94 2.35
 -1 -9 -4 35.81 2.38
 -1 9 4 34.9 2.07
 -1 -9 -5 243.4 6.37
 -1 9 5 234.27 5.72
 1 -9 -5 249.95 6.4
 -1 -9 -6 57.28 3.26
 1 -9 -6 56 3.26
 -1 -9 -7 215.49 6.54
 1 -9 -7 226.37 6.57
 1 -9 -8 0.65 0.71
 -1 -9 -8 0.15 0.57
 1 -9 8 0.38 0.39
 -1 -9 8 0.62 0.37
 -1 9 9 5.48 0.68
 1 -9 9 6.27 0.81
 1 9 9 5.73 0.69
 1 -9 -9 5.92 1.2
 -1 -9 9 6.52 0.8
 -1 9 9 5.44 0.68
 -1 -9 -9 5.79 1.31
 1 9 10 3.83 0.66
 1 -9 10 4.29 0.83
 -1 9 10 2.67 0.58
 1 -9 -10 3.2 0.99
 -1 9 10 2.56 0.59
 -1 -9 -10 3.06 1.08
 -1 -9 10 3.23 0.68
 1 -9 11 8.79 0.97
 -1 9 11 9.98 1.02
 1 9 11 10.86 1.08
 -1 -9 -11 9.91 1.73
 -1 -9 11 10.52 1.11
 -1 -9 12 2.18 0.74
 1 9 12 3.15 0.75
 -1 9 12 1.5 0.56
 1 9 13 68.29 2.67
 1 -9 13 61.46 2.74
 -1 9 13 67.86 2.68
 -1 -9 13 62.8 2.71
 1 -9 14 16.9 1.55
 -1 9 14 21.01 1.63
 1 9 14 20.02 1.6
 -1 -9 14 15.01 1.54
 -1 9 15 112.08 3.52
 -1 -9 15 101.09 3.56
 1 -9 15 110.67 3.67
 1 9 15 107.72 3.48
 -1 9 -15 107.47 3.22
 1 -9 16 6.23 1.07
 1 9 -16 4.97 0.83
 -1 9 16 6.84 1.04
 -1 -9 16 3.32 0.83
 -1 9 -16 4.98 0.84
 -1 -9 17 0.83 0.68
 1 9 -17 0.63 0.48
 -1 9 -17 0.36 0.4
 1 9 -18 -0.11 0.41
 -1 -9 18 1.17 0.64
 1 -9 18 1.43 0.66
 -1 9 -18 -0.77 0.44
 -1 9 -19 0.11 0.31
 1 9 -19 0.81 0.48
 1 11 0 33.48 1.11
 -1 11 0 31.84 1.36
 -1 11 1 51.93 1.83
 1 11 1 54.62 1.69
 -1 11 2 0.04 0.4
 1 11 2 -0.11 0.34
 -1 -11 -2 0.38 0.57
 -1 -11 -3 33.37 2.29
 1 11 3 33.82 1.89
 -1 11 3 31.7 1.79
 -1 -11 -4 47.39 2.93
 -1 11 4 43.7 2.34
 1 -11 -4 45.85 2.78
 -1 -11 -5 354 8.15
 -1 11 5 332.35 6.95
 1 -11 -5 358.58 8.16
 -1 -11 -6 87.45 4.25
 1 -11 -6 84.56 4.25
 1 -11 -7 273.7 7.72
 -1 -11 -7 259.7 7.57
 1 -11 8 0.45 0.47
 1 -11 -8 -0.13 0.52
 -1 -11 8 0.18 0.36
 -1 -11 -8 0.61 0.73
 1 -11 -9 51.93 3.59
 -1 11 9 43.96 1.82
 1 11 9 49.18 1.9
 -1 -11 9 50.89 2.09
 -1 -11 -9 52.24 3.73
 -1 11 9 42.9 1.73
 1 -11 9 53.27 2.1
 1 -11 10 7.1 0.99
 -1 -11 -10 7.31 1.58
 1 11 10 6.32 0.84
 1 -11 -10 6.4 1.47
 -1 11 10 5.35 0.77
 -1 11 10 6.68 0.82
 -1 -11 10 6.88 0.9
 -1 11 11 3.83 0.62
 1 11 11 6.61 0.89
 -1 11 11 6.22 0.84
 -1 -11 11 6.44 0.94
 1 -11 11 5.18 0.8
 -1 -11 -11 5 1.26
 1 11 12 2.37 0.69
 -1 11 12 1.27 0.61
 1 -11 12 0.49 0.64
 -1 -11 12 1.85 0.7
 -1 -11 13 11.66 1.2
 1 -11 13 13.42 1.38
 -1 11 13 14.76 1.32
 1 11 13 13.69 1.3
 -1 11 -14 17.97 1.5
 -1 -11 14 12.18 1.33
 1 -11 14 12.92 1.39
 -1 11 14 17.98 1.49
 1 11 14 16.46 1.44
 -1 -11 15 48.2 2.5
 1 -11 15 49.91 2.59
 -1 11 -15 54.56 2.34
 -1 11 15 54.87 2.52
 -1 11 -16 4.05 0.75
 1 -11 16 3.83 0.97
 -1 -11 16 2.08 0.75
 1 11 -16 4.38 0.83
 -1 11 -17 2.26 0.54
 1 11 -17 4.67 0.83
 -1 -11 17 2.95 0.76
 1 -11 17 4.37 0.89
 1 -11 18 1.03 0.58
 1 11 -18 0.02 0.38
 -1 -11 18 1.28 0.63
 -1 11 -18 0.13 0.38
 -1 11 -19 -0.3 0.34
 1 11 -19 -0.12 0.31
 -1 13 0 112.7 2.73
 1 13 0 116.01 2.27
 -1 13 1 109.87 2.86
 1 13 1 113.62 2.61
 1 13 -1 105.76 1.98
 -1 13 2 0.94 0.43
 1 13 2 1.17 0.48
 -1 -13 -2 0.26 0.65
 -1 -13 -3 35.52 2.55
 1 13 3 36.41 2
 -1 13 3 34.65 1.95
 -1 13 4 18.25 1.64
 1 -13 -4 20.37 1.99
 -1 -13 -4 22.44 2.16
 -1 -13 -5 167.26 5.95
 1 -13 -5 162.36 5.81
 -1 13 5 158.89 4.92
 -1 -13 -6 90.07 4.63
 1 -13 -6 93.94 4.68
 -1 -13 -7 44.64 3.38
 1 -13 -7 44.04 3.33
 -1 -13 8 5.42 0.74
 -1 -13 -8 5.71 1.38
 -1 13 8 5.32 0.63
 1 -13 -8 6.54 1.47
 1 -13 8 5.22 0.75
 -1 -13 -9 71.16 4.48
 -1 13 9 64.49 2.15
 -1 -13 9 73.49 2.52
 1 13 9 66.48 2.21
 -1 13 9 65.58 2.16
 1 -13 -9 73.78 4.51
 1 -13 9 69.57 2.51
 1 -13 10 18.3 1.46
 -1 -13 10 18.72 1.45
 -1 13 10 17.21 1.19
 -1 13 10 17.95 1.28
 1 -13 -10 17.31 2.33
 -1 -13 -10 19.82 2.57
 1 13 10 19.6 1.34
 1 13 11 13.08 1.19
 1 -13 11 10.55 1.1
 -1 13 11 12.57 1.15
 -1 13 11 10.82 1.02
 -1 -13 11 11.84 1.22
 -1 -13 -11 10.11 1.85
 1 13 12 1.25 0.62
 -1 13 12 0.8 0.59
 1 -13 12 -0.4 0.81
 -1 -13 12 1.04 0.65
 -1 -13 13 3.19 0.71
 1 -13 13 3.5 0.85
 -1 13 13 4.77 0.85
 -1 -13 14 2.33 0.75
 -1 13 -14 6.06 0.92
 -1 13 14 5.01 0.89
 1 -13 14 4.13 0.93
 -1 -13 15 18.49 1.62
 -1 13 -15 19.9 1.5
 1 -13 15 20.46 1.67
 -1 -13 16 2.31 0.75
 1 -13 16 3.31 0.85
 -1 13 -16 3.42 0.71
 1 13 -16 2.94 0.72
 1 -13 17 0.3 0.5
 1 13 -17 0.92 0.55
 -1 -13 17 0.08 0.52
 -1 13 -17 0.03 0.4
 -1 13 -18 1.35 0.43
 -1 -13 18 1.73 0.63
 1 13 -18 1.59 0.5
 -1 15 0 82.37 2.5
 1 15 0 86.22 2.15
 1 15 -1 128.13 2.39
 -1 15 -1 134.53 3.21
 1 15 1 137.61 3.05
 -1 15 1 131.98 3.32
 -1 15 2 13.61 1.19
 1 15 2 14.3 1.18
 -1 -15 -2 15.18 1.74
 1 15 3 4.72 0.84
 -1 15 3 4.61 0.85
 -1 -15 -3 4.02 1.12
 -1 -15 -4 6.11 1.25
 1 -15 -4 6.53 1.28
 -1 15 4 6.88 1.03
 -1 -15 -5 90.76 4.67
 1 -15 -5 88.67 4.53
 -1 15 5 91.45 3.83
 -1 -15 -6 5.04 1.27
 1 -15 -6 3.72 1.11
 -1 15 7 6.82 0.68
 1 -15 -7 9.1 1.73
 -1 -15 -7 10.61 1.87
 -1 -15 8 19.24 1.31
 1 -15 -8 21.27 2.59
 1 -15 8 17.91 1.25
 1 15 8 17.54 1.12
 -1 15 8 19.97 1.17
 1 -15 9 59.64 2.36
 -1 -15 9 64.81 2.43
 1 15 9 51.95 1.96
 -1 -15 -9 62.02 4.4
 1 -15 -9 62.52 4.37
 -1 15 9 60.54 2.14
 1 15 9 53.04 2.02
 -1 15 10 33.07 1.7
 -1 -15 -10 36.92 3.53
 1 -15 -10 33.29 3.27
 1 -15 10 34.64 1.91
 1 15 10 29.36 1.56
 -1 -15 10 36.01 1.98
 1 15 10 33.03 1.71
 -1 -15 11 36.62 2.04
 1 -15 11 35.24 1.98
 -1 -15 -11 34.31 3.53
 -1 15 11 32.2 1.75
 -1 15 12 2.34 0.68
 -1 -15 12 2.11 0.78
 1 -15 12 1.03 0.58
 -1 15 12 1.32 0.55
 -1 15 13 0.69 0.55
 1 -15 13 -0.53 0.7
 -1 -15 13 -1.05 0.78
 1 -15 14 3.94 0.9
 -1 -15 14 3.3 0.84
 -1 15 -14 5.76 0.91
 -1 15 -15 8.94 1.02
 -1 -15 15 8 1.12
 1 -15 15 8.71 1.12
 1 15 -15 9.6 1.06
 1 15 -16 -0.74 0.57
 -1 15 -16 -0.68 0.57
 -1 -15 16 -0.25 0.59
 1 -15 16 0.02 0.51
 -1 -15 17 1.47 0.63
 1 -15 17 1.76 0.7
 -1 15 -17 1.44 0.54
 1 15 -17 2.1 0.59
 1 15 -18 5.84 0.73
 -1 -15 18 5.05 0.84
 -1 15 -18 5.18 0.71
 1 17 0 95.24 2.41
 -1 17 0 96.46 2.88
 1 17 1 54.65 2.05
 -1 17 -1 53.6 2.14
 -1 17 1 53.33 2.25
 1 17 -1 50.72 1.63
 -1 17 2 7.9 1.01
 1 17 2 8.38 0.96
 1 17 -2 6.95 0.63
 -1 -17 -2 8.72 1.46
 -1 -17 -3 0.29 0.77
 -1 17 3 0.02 0.44
 1 17 3 0.37 0.55
 -1 17 4 1.36 0.63
 -1 -17 -4 1.29 0.82
 1 -17 -4 1.16 0.86
 -1 -17 -5 6.29 1.48
 -1 17 5 6.67 1.22
 1 -17 -5 6.12 1.41
 1 17 6 1.4 0.43
 -1 -17 -6 1.02 0.93
 -1 17 6 1.26 0.42
 1 -17 -6 1.67 0.88
 -1 17 7 26.4 1.42
 1 -17 -7 27.33 2.98
 -1 -17 7 21.23 1.31
 1 17 7 24.78 1.31
 -1 -17 -7 29.6 3.09
 1 -17 8 32.41 1.72
 1 -17 -8 44.2 3.76
 1 17 8 35.37 1.65
 -1 -17 -8 40.96 3.63
 -1 17 8 40.19 1.72
 -1 -17 8 36.29 1.78
 1 -17 -9 83.37 5.26
 1 -17 9 79.08 2.72
 1 17 9 77.78 2.46
 -1 17 9 84.73 2.6
 -1 -17 9 82.42 2.84
 -1 -17 -9 82.24 5.23
 1 -17 10 47.97 2.29
 1 17 10 45.04 1.99
 -1 17 10 52.79 2.15
 1 -17 -10 48.94 4.12
 -1 -17 10 51.8 2.37
 -1 -17 -10 48.9 4.24
 -1 17 11 23.79 1.52
 -1 -17 -11 18.53 2.82
 -1 -17 11 24.22 1.7
 1 -17 11 24.44 1.72
 -1 -17 12 3.8 0.78
 1 -17 12 4.33 0.84
 -1 17 12 5.64 0.84
 -1 -17 13 -0.43 0.83
 -1 17 -13 0.51 0.6
 1 -17 13 -0.09 0.63
 -1 17 -14 4.27 0.81
 1 -17 14 4.65 0.9
 -1 -17 14 3.78 0.85
 -1 -17 15 2.69 0.73
 1 17 -15 2.78 0.67
 -1 17 -15 2.97 0.64
 1 -17 15 3.68 0.88
 -1 17 -16 -0.78 0.55
 1 17 -16 0.13 0.5
 1 -17 16 -0.08 0.6
 -1 -17 16 -0.55 0.63
 -1 17 -17 2.8 0.6
 1 -17 17 2.34 0.69
 -1 -17 17 1.58 0.63
 1 17 -17 2.72 0.58
 -1 -17 18 10.26 1.02
 1 17 -18 12.32 1
 -1 17 -18 11.34 1
 1 19 0 123.33 2.88
 -1 19 0 142.95 3.71
 -1 19 1 54.63 2.45
 1 19 1 51.78 2.08
 -1 19 -1 54.54 2.28
 -1 -19 -2 1.21 0.77
 -1 19 2 0.84 0.46
 1 19 2 0.65 0.42
 -1 19 -2 0.76 0.38
 1 -19 -3 2.64 1.02
 -1 19 3 3.13 0.78
 -1 -19 -3 2.27 0.97
 1 19 3 3.21 0.81
 -1 19 4 0.99 0.32
 -1 19 4 0.84 0.56
 -1 -19 -4 1.2 0.94
 1 -19 -4 1.24 0.91
 -1 -19 -5 9.33 1.81
 1 19 5 7.39 0.71
 -1 19 5 7.84 0.74
 1 -19 -5 8.74 1.79
 -1 19 5 8.62 1.41
 -1 19 6 2.98 0.59
 -1 -19 -6 3.74 1.23
 1 19 6 3.38 0.55
 1 -19 -6 3.4 1.24
 1 -19 -7 3.69 1.23
 -1 -19 -7 4.3 1.5
 -1 19 7 5.78 0.71
 1 19 7 4.8 0.63
 -1 -19 8 36.47 1.81
 1 19 8 42.13 1.83
 1 -19 -8 42.42 4.02
 -1 -19 -8 42.87 3.88
 -1 19 8 41.96 1.83
 -1 -19 -9 47.28 4.22
 -1 -19 9 51.99 2.29
 1 -19 -9 51.32 4.34
 -1 19 9 51.6 2.16
 1 19 9 50.04 2.1
 1 -19 10 35.24 1.96
 1 19 10 37.69 1.88
 -1 19 10 38.8 1.96
 -1 -19 10 39.09 2.12
 -1 -19 -10 36.64 3.69
 1 -19 -10 34.97 3.68
 -1 19 11 14.79 1.27
 1 -19 11 12.34 1.34
 1 19 11 12.87 1.21
 -1 -19 11 14.76 1.4
 -1 -19 -11 9.52 2.08
 -1 -19 12 1.89 0.58
 1 -19 12 2.09 0.75
 -1 19 -13 0.57 0.58
 1 -19 13 -0.22 0.63
 -1 -19 13 -0.49 0.66
 1 -19 14 4.2 0.91
 -1 -19 14 3.75 0.87
 -1 19 -14 4.93 0.84
 -1 -19 15 8.41 1.15
 -1 19 -15 7.88 0.93
 1 19 -15 7.95 1
 1 -19 15 7.79 1.11
 -1 -19 16 2.53 0.71
 -1 19 -16 1 0.47
 1 19 -16 1.29 0.53
 1 -19 16 1.83 0.75
 -1 -19 17 2.69 0.69
 1 19 -17 2.36 0.57
 -1 19 -17 1.85 0.51
 1 19 -18 12.49 1
 -1 19 -18 12.66 0.99
 -1 21 0 190.99 4.54
 -1 21 1 48.8 2.43
 -1 21 -1 47.22 2.24
 -1 -21 -2 0.79 0.95
 -1 21 2 0.79 0.42
 1 21 2 0.85 0.48
 -1 21 -2 0.08 0.32
 -1 -21 -3 32.01 3.06
 1 -21 -3 34.27 3.11
 -1 21 3 28.38 2.07
 -1 21 4 36.44 1.56
 -1 21 4 41.69 2.65
 -1 -21 -4 44.14 3.71
 1 -21 -4 42.93 3.62
 -1 -21 -5 30.25 3.23
 1 -21 -5 31.67 3.16
 1 21 5 28.04 1.41
 -1 21 5 27.25 1.39
 -1 21 5 29.12 2.42
 -1 -21 -6 26.2 3.04
 1 -21 -6 26.78 3.09
 -1 21 6 26.48 1.4
 1 21 6 26.41 1.42
 -1 21 7 2.57 0.58
 1 21 7 2.68 0.56
 -1 -21 -7 2.25 1.21
 1 -21 -7 2.45 1.15
 1 -21 -8 11.24 2.18
 -1 21 8 12.31 1.09
 1 21 8 12.79 1.11
 -1 -21 -8 12.87 2.3
 -1 -21 -9 13.39 2.35
 -1 21 9 15.45 1.25
 1 21 9 16.16 1.28
 1 -21 -9 14.9 2.58
 1 -21 -10 14.05 2.4
 1 21 10 16.26 1.35
 -1 -21 -10 14.59 2.46
 -1 21 10 16.61 1.32
 -1 -21 10 16.75 1.39
 -1 -21 -11 5.75 1.76
 -1 -21 11 7.32 1.01
 1 21 11 6.45 0.9
 -1 21 11 8.28 1.04
 1 -21 12 1.64 0.65
 -1 21 -12 2.38 0.68
 -1 -21 12 1.36 0.55
 -1 21 12 2.61 0.73
 -1 -21 13 1.49 0.55
 -1 21 -13 2.58 0.73
 1 -21 13 2.29 0.71
 1 -21 14 10.87 1.22
 1 21 -14 12.93 1.21
 -1 21 -14 12.14 1.17
 -1 -21 14 9.16 1.16
 -1 -21 15 11.4 1.22
 1 21 -15 13.57 1.24
 1 -21 15 11.12 1.24
 -1 21 -15 11.1 1.12
 -1 21 -16 4.74 0.74
 -1 -21 16 4.58 0.83
 1 21 -16 5.18 0.81
 -1 21 -17 -0.22 0.38
 1 21 -17 0.1 0.41
 -1 -21 17 0.47 0.51
 -1 23 1 16.89 1.5
 -1 -23 -1 22.62 2.75
 -1 -23 -2 1.54 1.02
 -1 23 2 0.89 0.43
 -1 -23 -3 52.24 4.09
 -1 23 3 42.2 2.61
 1 -23 -3 47.6 3.96
 -1 23 4 180.78 5.7
 1 -23 -4 188.99 7.82
 -1 23 4 168.12 3.4
 -1 -23 -4 192.32 7.97
 1 23 5 71.68 2.31
 -1 -23 -5 78.42 5.32
 -1 23 5 71.47 2.29
 1 -23 -5 78.26 5.24
 1 23 6 79.59 2.56
 1 -23 -6 81.72 5.55
 -1 23 6 83.22 2.53
 -1 -23 -6 84.98 5.63
 1 23 7 14.92 1.17
 -1 -23 -7 12.76 2.34
 -1 23 7 12.93 1.08
 1 -23 -7 12.86 2.32
 1 -23 -8 0.34 0.78
 -1 -23 -8 1.2 1.02
 1 23 8 0.97 0.51
 -1 23 8 0.94 0.45
 -1 -23 -9 3.95 1.36
 -1 23 9 4.26 0.78
 1 23 9 5.16 0.84
 1 -23 -9 2.71 1.28
 -1 -23 -10 6.93 1.84
 1 -23 -10 6.17 1.74
 1 23 10 6.69 0.92
 -1 23 -10 8.18 0.95
 -1 23 10 6.95 0.98
 1 23 11 -0.59 0.54
 -1 23 11 -0.24 0.46
 -1 23 -11 0.11 0.46
 -1 -23 -11 0.28 0.7
 -1 23 12 2.76 0.68
 -1 23 -12 -0.29 0.5
 -1 23 -13 7.28 1.11
 1 23 -13 6.49 0.97
 -1 23 -14 28.92 1.71
 1 23 -14 30.65 1.84
 1 23 -15 12.96 1.21
 -1 23 -15 12.86 1.15
 -1 23 -16 12.88 1.16
 1 23 -16 11.51 1.05
 1 23 -17 4.47 0.7
 -1 23 -17 0.62 0.43
 -1 -25 -1 9.2 1.98
 -1 25 1 9.85 0.85
 -1 25 2 5.46 0.64
 -1 -25 -2 7.33 1.79
 1 -25 -2 6.08 1.48
 -1 -25 -3 24.91 3.03
 -1 25 3 19.9 1.21
 1 -25 -3 27.6 3.19
 1 -25 -4 177.17 8.02
 -1 -25 -4 173.65 8.04
 -1 25 4 163.67 3.49
 -1 -25 -5 82.18 5.73
 -1 25 5 79.36 2.58
 1 -25 -5 78.75 5.5
 1 25 5 83.57 2.63
 1 -25 -6 160.4 8.09
 -1 -25 -6 168.15 8.15
 -1 25 -6 154.67 3.35
 1 25 6 168.29 3.78
 -1 25 6 170.52 3.79
 1 25 7 13.48 1.21
 -1 25 7 12.6 1.13
 1 -25 -7 11.17 2.24
 -1 25 -7 13 1.13
 -1 -25 -7 10.79 2.35
 -1 25 -8 0.87 0.51
 1 -25 -8 1.03 0.83
 -1 25 8 0.29 0.5
 -1 -25 -8 0.26 1.01
 1 25 8 0.48 0.49
 -1 25 -9 3.96 0.73
 1 -25 -9 3.35 1.39
 -1 25 9 3.38 0.76
 1 25 9 2.52 0.64
 -1 -25 -9 1.84 1.01
 1 25 10 2.99 0.72
 -1 25 -10 2.38 0.63
 -1 25 10 1.81 0.63
 -1 -25 -10 3.17 1.38
 1 -25 -10 2.54 1.31
 1 25 11 -0.28 0.54
 -1 25 -11 0.62 0.48
 -1 25 11 0.96 0.67
 1 25 -12 13.78 1.27
 -1 25 -12 13.96 1.24
 -1 25 12 13.37 1.24
 -1 25 -13 8.13 1.01
 1 25 -13 8.81 1.02
 -1 25 -14 28.1 1.67
 1 25 -14 29.38 1.73
 1 25 -15 14.3 1.18
 -1 25 -15 13.95 1.17
 -1 25 -16 20.81 1.33
 1 25 -16 20.34 1.31
 -1 25 -17 1.16 0.39
 1 25 -17 1.51 0.43
 -1 -27 0 33.58 3.74
 -1 -27 -1 0.37 0.84
 -1 27 1 0.7 0.49
 1 -27 -2 5.33 1.54
 -1 27 2 5.47 0.7
 -1 -27 -2 5.64 1.55
 -1 -27 -3 15.07 2.62
 -1 27 3 12.52 1.05
 1 -27 -3 15.81 2.63
 -1 -27 -4 127.99 7.29
 -1 27 4 125.11 3.2
 1 -27 -4 130.79 7.33
 1 27 5 38.47 1.9
 -1 27 5 36.09 1.85
 1 -27 -5 35.38 4.04
 -1 -27 -5 34.47 4.01
 1 27 6 124.62 3.4
 -1 -27 -6 111.93 7.05
 -1 27 6 124.89 3.36
 1 -27 -6 111.51 7.09
 1 27 7 1.9 0.72
 -1 27 -7 1.55 0.56
 -1 27 7 0.87 0.63
 -1 -27 -7 1.49 1.05
 1 -27 -7 1.58 1.07
 -1 27 -8 2.84 0.65
 1 -27 -8 3.51 1.48
 -1 -27 -8 2.29 1.28
 1 27 8 2.54 0.67
 -1 27 8 3.03 0.73
 1 27 9 2.23 0.65
 1 -27 -9 2.32 1.41
 -1 27 9 2.12 0.57
 -1 27 -9 2.42 0.61
 -1 -27 -9 1.78 1.2
 -1 27 -10 6.33 0.87
 1 27 -10 6.79 0.87
 -1 27 10 6.67 1.01
 1 27 10 6.9 0.98
 1 27 -11 -0.03 0.46
 1 27 11 -0.49 0.57
 -1 27 -11 0.29 0.41
 -1 27 11 1.27 0.79
 -1 27 -12 11.95 1.15
 1 27 -12 12.31 1.16
 -1 27 12 12.44 1.25
 1 27 -13 9.67 1.05
 -1 27 -13 9.39 1.04
 1 27 -14 43.42 2
 -1 27 -14 42.89 1.97
 1 27 -15 9.48 0.96
 -1 27 -15 9.13 0.94
 -1 27 -16 18.82 1.2
 1 27 -16 18.25 1.18
 -1 -29 0 26.04 3.61
 -1 29 0 25.82 1.46
 -1 -29 -1 3.4 1.58
 -1 29 1 3.74 0.66
 1 -29 -1 2.16 1.31
 -1 -29 1 2.46 1.12
 1 -29 -2 0.16 0.88
 -1 29 2 0.07 0.4
 -1 -29 -2 0.4 0.81
 -1 -29 -3 4 1.52
 -1 29 3 4.53 0.78
 1 -29 -3 4.66 1.7
 -1 29 4 71.92 2.55
 1 -29 -4 74.42 5.9
 -1 -29 -4 75.33 5.96
 1 -29 -5 8.6 2.2
 1 29 5 8.18 1
 -1 -29 -5 6.2 1.91
 -1 29 5 7.43 0.96
 1 -29 -6 13.17 2.61
 -1 -29 -6 11.18 2.46
 1 29 6 14 1.22
 -1 29 6 13.66 1.22
 1 29 7 0.35 0.5
 1 -29 -7 1.23 1.08
 -1 -29 -7 0.31 0.99
 -1 29 7 -0.59 0.61
 -1 29 8 2.06 0.62
 -1 29 -8 2.09 0.57
 1 29 -8 2.71 0.61
 1 29 8 3.06 0.71
 1 -29 -8 2.68 1.38
 -1 -29 -8 1.81 1.19
 1 29 -9 5.57 0.82
 1 29 9 6.42 0.97
 -1 29 -9 5.52 0.81
 -1 29 9 5.84 0.92
 1 29 10 25.07 1.71
 -1 29 10 26.07 1.76
 1 29 -10 25.3 1.57
 -1 29 -10 24.34 1.49
 1 29 -11 0.32 0.44
 -1 29 11 0.09 0.53
 1 29 11 0.64 0.46
 -1 29 -11 1.04 0.5
 1 29 12 1.46 0.57
 -1 29 -12 1.51 0.49
 1 29 -12 1.85 0.5
 -1 29 12 2.46 0.64
 -1 29 13 1.96 0.54
 -1 29 -13 3.13 0.65
 1 29 -13 3.58 0.7
 -1 29 -14 50.2 2.07
 1 29 -14 51.65 2.07
 -1 29 -15 4.75 0.72
 1 29 -15 4.1 0.64
 1 -31 0 109.91 7.67
 -1 31 0 113.8 3.1
 1 31 0 103.06 2.89
 -1 -31 0 109.79 7.57
 1 -31 -1 5.24 1.96
 -1 31 1 5.79 0.81
 -1 -31 -1 3.59 1.54
 -1 -31 1 5.65 1.87
 -1 -31 2 6.78 1.94
 -1 31 2 7.4 0.84
 -1 -31 -2 6.95 2.23
 1 -31 -2 7.91 2.22
 -1 -31 3 0.52 1.23
 -1 31 3 0.19 0.49
 1 -31 -3 0.76 1.06
 -1 -31 -3 0.47 0.96
 -1 31 4 5.39 0.83
 -1 -31 -4 4.93 1.91
 1 -31 -4 5.2 1.83
 1 31 4 6.26 0.95
 1 31 5 0.52 0.59
 -1 -31 -5 1.42 1.16
 1 -31 -5 0.03 0.97
 -1 31 5 -0.28 0.54
 -1 31 6 17.85 1.4
 1 -31 -6 14.01 2.87
 1 31 6 17.78 1.42
 -1 -31 -6 16.03 3.04
 -1 -31 -7 -0.11 0.81
 1 -31 -7 -0.34 0.81
 1 31 7 -0.4 0.57
 -1 31 7 -0.8 0.64
 1 31 8 27.66 1.8
 -1 31 8 27.61 1.77
 1 31 9 8.87 1.12
 -1 31 -9 6.78 0.85
 -1 31 9 7.6 1.11
 1 31 -10 64.05 2.36
 -1 31 10 72.76 2.91
 -1 31 -10 64.81 2.37
 1 31 10 69.08 2.87
 1 31 11 2.98 0.72
 1 31 -11 3.75 0.71
 -1 31 11 3.36 0.8
 -1 31 -11 3.45 0.66
 1 31 12 1.9 0.56
 -1 31 12 1.88 0.61
 -1 31 -12 1.17 0.46
 1 31 -12 1.01 0.43
 -1 31 -13 0.34 0.36
 1 31 -13 0.73 0.43
 -1 31 13 -0.02 0.41
 1 31 -14 14.54 1.08
 -1 31 -14 15.36 1.11
 -1 33 0 185.55 4.09
 -1 -33 0 186.68 10.43
 1 -33 0 192.1 10.79
 -1 -33 1 6.59 2.27
 -1 33 -1 7.35 0.99
 1 -33 1 6.46 2.22
 1 -33 -1 6.35 2.2
 -1 33 1 6.65 0.9
 -1 -33 -1 8 2.35
 1 -33 -2 37.67 4.74
 -1 -33 -2 37.18 4.67
 -1 33 2 45.6 2.19
 -1 -33 2 43.29 5.14
 -1 -33 -3 2.33 1.41
 1 -33 -3 1.07 1.09
 -1 33 3 2.85 0.76
 -1 -33 3 0.42 1.06
 1 33 4 6.41 1.05
 1 -33 -4 5.76 2.12
 -1 33 4 6.5 0.99
 -1 -33 -4 4.87 1.82
 -1 -33 4 5.19 1.89
 1 33 5 1.26 0.69
 -1 33 5 1.24 0.68
 1 -33 -5 0.73 0.99
 1 33 6 27.7 1.8
 -1 33 6 26.96 1.76
 1 33 7 0.36 0.55
 -1 33 7 0.48 0.59
 1 33 8 48.13 2.34
 -1 33 8 49.33 2.37
 1 33 9 8.65 1.15
 -1 33 9 8.95 1.3
 1 33 10 105.41 3.46
 -1 33 10 109.47 3.56
 1 33 11 3.57 0.79
 -1 33 11 3.26 0.81
 -1 33 12 11.62 1.11
 1 33 -12 10.79 0.95
 -1 33 -12 11.26 0.97
 -1 33 -13 -0.19 0.29
 1 33 -13 0.54 0.37
 1 -35 0 197.69 11.59
 -1 35 0 191.87 4.21
 -1 -35 0 185.35 11
 -1 35 -1 4.12 0.84
 -1 -35 1 3.88 1.84
 1 -35 -1 3.66 1.95
 -1 35 1 7.18 1.33
 -1 35 1 3.7 0.73
 -1 -35 -1 3.6 1.82
 1 -35 1 0.94 1.27
 1 -35 -2 95.86 7.93
 -1 35 2 110.23 3.41
 1 -35 2 94.32 8.13
 -1 35 -2 100.56 3.06
 -1 -35 -2 102.49 8.24
 -1 -35 2 87.55 7.67
 1 -35 3 2.06 1.41
 -1 -35 3 2.28 1.61
 -1 35 3 3.06 0.81
 1 35 3 4.01 0.92
 1 -35 -3 1.97 1.44
 -1 -35 -3 1.9 1.56
 1 35 4 4.68 0.87
 -1 35 4 4.22 0.86
 1 35 5 2.48 0.83
 -1 35 5 0.32 0.54
 1 35 6 13.55 1.31
 -1 35 6 14.81 1.39
 -1 35 7 -0.87 0.65
 1 35 7 -0.56 0.69
 1 35 8 50.1 2.38
 -1 35 8 50.84 2.39
 1 35 9 4.88 1
 -1 35 9 6.65 1.06
 -1 35 10 101.67 3.31
 1 35 10 96.8 3.21
 -1 35 11 3.51 0.82
 1 35 11 4.35 0.8
 -1 35 12 16.39 1.25
 -1 37 0 155.06 3.84
 -1 37 0 163.07 4.31
 -1 37 -1 5.15 0.93
 -1 37 1 6.93 1.22
 1 37 2 45.74 2.44
 1 37 -2 43.12 2.03
 -1 37 2 46.61 2.39
 -1 37 -2 44.86 2.13
 1 37 3 0.78 0.7
 -1 37 -3 0.57 0.47
 -1 37 3 0.39 0.62
 -1 37 4 24.25 1.71
 1 37 4 25.16 1.75
 1 37 5 0.56 0.69
 -1 37 5 0.64 0.63
 -1 37 6 8.36 1.03
 1 37 6 10.62 1.16
 -1 37 7 -0.48 0.68
 1 37 7 -0.09 0.6
 1 37 8 23.89 1.64
 -1 37 8 23.78 1.67
 1 37 9 2.68 0.75
 -1 37 9 2.34 0.81
 1 37 10 61.2 2.5
 -1 37 10 62.28 2.56
 -1 37 11 1.89 0.56
 1 37 11 1.13 0.51
 -1 37 12 5.19 0.69
 -1 39 0 137.22 4
 1 39 1 2.79 1.02
 -1 39 -1 1.04 0.56
 -1 39 -1 3.44 0.98
 -1 39 1 2.43 0.87
 1 39 2 0.61 0.65
 -1 39 -2 -0.21 0.49
 -1 39 2 0.75 0.63
 -1 39 -2 0.88 0.69
 1 39 -3 0.56 0.4
 1 39 3 1.32 0.69
 -1 39 -3 0.91 0.53
 -1 39 3 1.69 0.73
 -1 39 4 40.07 2.15
 1 39 4 39.86 2.19
 -1 39 -4 39.74 1.98
 1 39 -4 39.28 1.93
 1 39 5 2.6 0.75
 -1 39 5 1.36 0.65
 1 39 6 10.81 1.17
 -1 39 6 10.22 1.07
 -1 39 7 0 0.56
 1 39 7 -0.73 0.53
 1 39 8 7.64 0.97
 -1 39 8 9.37 1.09
 1 39 9 1.39 0.62
 -1 39 9 1.19 0.62
 -1 39 10 18.88 1.37
 1 39 10 16.96 1.28
 -1 39 11 0.14 0.34
 1 39 11 -0.15 0.32
 -1 41 0 25.06 1.75
 1 41 0 25.44 1.8
 1 41 1 1.08 0.74
 1 41 -1 1.81 0.79
 -1 41 1 0.57 0.62
 -1 41 -1 0.93 0.64
 1 41 2 4.26 0.81
 -1 41 -2 4.95 0.87
 -1 41 -2 4.74 0.72
 -1 41 2 4.51 0.82
 -1 41 3 2.48 0.76
 -1 41 -3 2.39 0.58
 1 41 3 2.51 0.73
 -1 41 -3 2.98 0.76
 1 41 -4 64.07 2.4
 1 41 4 71.03 2.78
 -1 41 -4 63.19 2.59
 -1 41 4 65 2.68
 -1 41 -4 64.89 2.47
 1 41 -5 5.29 0.78
 -1 41 5 4.24 0.84
 -1 41 -5 5.76 0.91
 -1 41 -5 6.08 0.86
 1 41 5 5.68 0.98
 -1 41 -6 34.57 1.77
 1 41 6 34.77 1.92
 1 41 -6 35.73 1.75
 -1 41 6 33.35 1.86
 -1 41 -7 0.09 0.41
 -1 41 7 0.04 0.47
 1 41 7 0.35 0.45
 1 41 8 3.48 0.69
 -1 41 8 3.05 0.67
 1 41 9 0.19 0.4
 -1 41 9 3.29 0.8
 1 41 10 2.12 0.49
 -1 41 10 1.65 0.45
 1 43 0 3.32 0.76
 -1 43 0 3.08 0.8
 -1 43 1 0.4 0.53
 1 43 -1 0.51 0.63
 -1 43 -1 -0.47 0.54
 1 43 1 -0.45 0.49
 -1 43 -2 4.86 0.88
 1 43 2 3.73 0.77
 1 43 -2 4.6 0.82
 -1 43 2 2.7 0.71
 1 43 3 3.09 0.73
 -1 43 -3 3.27 0.71
 1 43 -3 5.12 0.93
 -1 43 3 2.74 0.69
 1 43 4 62.39 2.51
 1 43 -4 60.34 2.43
 -1 43 -4 53.69 2.12
 -1 43 -4 55.78 2.29
 -1 43 4 60.13 2.47
 1 43 5 7.92 1.03
 -1 43 -5 7.54 0.87
 1 43 -5 8.15 0.99
 -1 43 5 7.45 0.98
 1 43 6 41.36 1.99
 -1 43 -6 39.33 1.77
 -1 43 6 44.47 2.08
 -1 43 -7 1.35 0.46
 1 43 -7 1.03 0.38
 -1 43 7 1.05 0.52
 1 43 7 1.98 0.63
 -1 43 8 0.05 0.39
 1 43 8 0.26 0.66
 1 43 -8 0.07 0.28
 -1 43 -8 0.25 0.33
 -1 43 9 -0.16 0.35
 1 45 0 15.58 1.31
 -1 45 0 14.65 1.27
 -1 45 -1 0.85 0.53
 1 45 -1 1.03 0.52
 -1 45 1 0.38 0.45
 1 45 1 0.43 0.49
 -1 45 2 0.7 0.43
 1 45 2 0.38 0.46
 -1 45 -2 1.44 0.58
 1 45 -2 1.5 0.53
 1 45 3 1.26 0.49
 1 45 -3 2.96 0.7
 -1 45 3 1.66 0.55
 -1 45 -3 1.6 0.53
 1 45 4 33.36 1.75
 -1 45 4 33.21 1.75
 1 45 -4 31.99 1.68
 1 45 5 7.01 0.88
 -1 45 5 8.16 0.94
 1 45 6 37.94 1.81
 -1 45 6 36.13 1.76
 1 45 7 2.1 0.55
 -1 45 7 1.78 0.5
 1 47 0 22.7 1.44
 -1 47 0 21.19 1.38
 -1 47 1 3.02 0.61
 1 47 -1 2.76 0.6
 -1 47 -1 2.74 0.56
 1 47 1 3.4 0.65
 -1 47 -2 0.63 0.35
 1 47 2 1.54 0.46
 1 47 -2 1.55 0.55
 -1 47 2 0.36 0.38
 -1 47 -3 -0.42 0.39
 1 47 -3 -0.13 0.32
 -1 47 3 -0.78 0.52
 1 47 3 -0.77 0.49
 -1 47 4 15.13 1.15
 1 47 4 13.08 1.04
 1 47 5 4.18 0.67
 -1 47 5 4.84 0.68
 -2 0 0 424.55 3.05
 -2 0 -1 0.1 0.17
 -2 0 -2 65.41 1.84
 2 0 -3 0.05 0.14
 -2 0 -3 -0.14 0.25
 -2 0 -4 0.43 0.37
 2 0 -4 0.23 0.21
 2 0 -5 0.11 0.24
 -2 0 -5 -0.33 0.54
 2 0 -6 4.79 0.62
 -2 0 -6 5.67 0.96
 2 0 -7 0.17 0.29
 -2 0 -7 -0.2 0.45
 2 0 -8 183.27 4.13
 -2 0 -8 202.44 5.69
 2 0 9 0.29 0.39
 -2 0 -9 0.04 0.48
 -2 0 9 0.75 0.48
 -2 0 -10 145.22 5.4
 -2 0 10 142.81 3.33
 2 0 10 148.02 3.46
 -2 0 11 0.81 0.59
 2 0 11 1.3 0.59
 -2 0 12 41.56 2.08
 2 0 12 41.94 2.06
 -2 0 13 -0.51 0.77
 2 0 13 0.49 0.56
 -2 0 -13 0.72 0.49
 -2 0 -14 2.9 0.61
 -2 0 14 1.27 0.61
 2 0 14 3.44 0.8
 -2 0 15 -0.54 0.75
 2 0 15 0.15 0.68
 -2 0 -15 -0.1 0.4
 -2 0 -16 6.04 0.76
 2 0 16 8.16 1.17
 2 0 -16 5.8 0.78
 -2 0 16 6.93 1.05
 -2 0 17 0.72 0.59
 2 0 17 1.66 0.8
 -2 0 18 19.81 1.45
 -2 -2 0 997.44 5.51
 -2 -2 -1 1.64 0.33
 -2 -2 1 1.73 0.23
 -2 2 -1 1.65 0.3
 -2 -2 1 1.62 0.18
 -2 2 -2 47.68 1.59
 -2 -2 -2 44.53 1.66
 -2 -2 2 47.67 1.44
 -2 -2 -3 0.91 0.41
 2 -2 -3 1.12 0.34
 -2 -2 3 1.25 0.48
 -2 2 -3 1.06 0.39
 -2 -2 -4 166.76 3.94
 2 2 -4 159.68 2.27
 -2 2 -4 161.37 3.56
 2 -2 -4 165.23 3.23
 2 2 -5 -0.02 0.23
 -2 2 -5 0.14 0.36
 -2 -2 -5 0.13 0.41
 2 -2 -5 0.4 0.34
 -2 -2 -6 2.08 0.65
 -2 2 -6 1.25 0.54
 2 -2 -6 1.79 0.49
 2 2 -6 1.59 0.35
 -2 -2 -7 0.84 0.55
 2 -2 -7 0.58 0.36
 -2 2 -7 0.76 0.56
 -2 -2 -8 74.11 3.55
 -2 2 -8 73.23 3.36
 2 -2 -8 67.49 2.72
 2 2 9 1.85 0.54
 -2 -2 -9 1.64 0.75
 2 -2 9 1.62 0.54
 -2 2 -9 0.89 0.55
 -2 -2 9 1.77 0.5
 -2 2 9 2.61 0.6
 2 2 10 121.56 3.12
 2 -2 10 123.88 3.18
 -2 -2 -10 124.98 5.13
 -2 2 10 116.27 3.04
 -2 -2 10 115.05 2.97
 -2 2 -10 120.24 4.89
 -2 -2 11 0.76 0.57
 2 2 11 0.43 0.44
 -2 2 11 1.32 0.6
 -2 -2 -11 0.31 0.48
 2 -2 11 0.03 0.49
 -2 -2 -12 40.24 1.73
 2 2 12 42.13 2.08
 -2 2 12 39.44 1.99
 2 -2 12 42.05 2.09
 -2 -2 12 41.03 2.02
 2 2 13 0.54 0.62
 2 -2 13 0.22 0.63
 -2 2 -13 0.29 0.41
 -2 -2 -13 0.16 0.41
 -2 2 13 -1.25 0.75
 -2 -2 -14 -0.01 0.38
 -2 2 14 0.01 0.62
 2 2 14 0.61 0.7
 -2 -2 14 -1.16 0.82
 2 -2 14 0.02 0.62
 -2 2 -14 -0.22 0.45
 2 -2 15 0.65 0.77
 -2 2 -15 -0.25 0.44
 2 2 15 0.89 0.7
 -2 -2 15 0.07 0.68
 -2 2 15 -1.33 0.77
 2 2 -16 0.05 0.37
 2 2 16 1.43 0.72
 2 -2 16 0.2 0.65
 -2 2 -16 -0.53 0.44
 -2 2 16 0.01 0.53
 -2 -2 16 0.59 0.62
 -2 -2 17 0.86 0.68
 -2 2 17 1.92 0.85
 -2 2 -17 0.27 0.34
 2 2 -17 0.4 0.4
 2 -2 17 1.81 0.81
 -2 -2 18 7.88 1
 -2 2 18 7.9 1.03
 -2 -2 19 2.09 0.64
 -2 -4 0 136.69 2.54
 -2 -4 -1 4.78 0.6
 -2 -4 1 4.34 0.3
 -2 -4 -2 5.35 0.73
 -2 -4 -3 0.58 0.45
 2 -4 -3 0.16 0.31
 -2 4 -4 48.4 2.05
 -2 -4 -4 48.95 2.31
 2 -4 -4 49.95 2.16
 2 -4 -5 13.1 1.22
 -2 -4 -5 13.87 1.39
 -2 4 -5 13.7 1.19
 -2 4 -6 16.84 1.47
 2 -4 -6 17.27 1.41
 -2 -4 -6 17.64 1.66
 2 -4 -7 3.44 0.72
 -2 -4 -7 3.33 0.87
 -2 4 -7 3.27 0.68
 -2 -4 -8 110.11 4.47
 2 -4 -8 103.07 3.71
 -2 -4 9 2.04 0.5
 2 4 9 1.95 0.5
 2 -4 9 2.06 0.54
 -2 4 9 2.38 0.6
 -2 -4 -9 2.2 0.87
 2 4 10 52.15 2.08
 -2 -4 10 48.96 1.97
 -2 4 10 51.5 2.04
 2 -4 10 49.84 2.08
 -2 -4 -10 51.99 3.43
 2 4 11 -0.21 0.53
 -2 -4 11 -0.03 0.44
 -2 -4 -11 0.06 0.51
 -2 4 11 1.04 0.56
 2 -4 11 -0.43 0.57
 2 -4 12 -0.15 0.62
 2 4 12 -0.26 0.52
 -2 4 12 -0.55 0.71
 -2 -4 12 0.32 0.56
 2 -4 13 0.04 0.62
 -2 -4 13 0.53 0.54
 -2 4 13 -1.34 0.76
 2 4 13 0.91 0.61
 -2 4 -13 0.4 0.43
 -2 -4 14 8.81 1.14
 2 4 14 12.8 1.38
 2 -4 14 10.1 1.24
 -2 4 -14 10.77 1.1
 -2 4 14 9.89 1.12
 -2 4 15 -0.26 0.56
 -2 -4 15 -0.19 0.7
 2 4 15 1.39 0.87
 2 -4 15 -0.21 0.68
 -2 4 -15 0.79 0.51
 -2 -4 16 1.57 0.65
 2 4 16 2.9 0.88
 -2 4 -16 0.91 0.47
 -2 4 16 1.71 0.69
 2 -4 16 1.65 0.78
 2 -4 17 1.5 0.74
 -2 -4 17 0.39 0.58
 2 4 -17 0.13 0.4
 -2 4 -17 -0.04 0.37
 -2 4 17 0.93 0.6
 2 4 -18 10.73 0.91
 -2 4 18 13.99 1.27
 -2 -4 18 13.63 1.26
 -2 4 -18 10.02 0.91
 -2 -4 19 1.36 0.58
 -2 -6 0 3.81 0.57
 -2 -6 -1 0.11 0.33
 -2 -6 -2 64.59 2.47
 -2 -6 -3 35.17 2.04
 2 -6 -4 1.03 0.56
 -2 -6 -4 1.73 0.68
 -2 -6 -5 0.43 0.57
 -2 6 5 0.24 0.54
 2 -6 -5 0.33 0.56
 2 -6 -6 95.97 3.67
 -2 6 6 97.37 3.99
 -2 -6 -6 91.27 3.78
 2 -6 -7 0.25 0.44
 -2 -6 -7 0.83 0.64
 -2 -6 -8 9.34 1.41
 2 -6 -8 8.91 1.26
 2 -6 9 2.37 0.57
 -2 -6 9 2.66 0.51
 2 6 9 2.92 0.59
 2 -6 -9 1.99 0.67
 -2 6 9 3.16 0.62
 -2 -6 -9 2.66 0.93
 -2 6 10 3.7 0.57
 -2 -6 -10 4.33 1.12
 -2 -6 10 3.31 0.61
 2 6 10 3.75 0.64
 2 -6 10 3.92 0.64
 -2 6 10 4.72 0.77
 -2 6 11 0.19 0.43
 -2 -6 -11 0.04 0.69
 2 -6 11 -0.46 0.67
 -2 6 11 -1.12 0.67
 -2 -6 11 -0.05 0.44
 2 6 11 -0.26 0.43
 2 -6 12 9.3 1.11
 -2 -6 12 8.82 1.08
 2 6 12 9.65 1.09
 -2 6 12 8.03 0.96
 2 -6 13 4.41 0.88
 -2 6 13 3.75 0.75
 -2 -6 13 5.66 1.02
 2 6 13 7.04 1.05
 2 6 14 46.09 2.32
 -2 -6 14 40.61 2.21
 -2 6 -14 43.79 2.03
 -2 6 14 40.56 2.19
 2 -6 15 2.46 0.83
 2 6 15 4.49 1.04
 -2 -6 15 1.4 0.68
 -2 6 -15 3.38 0.79
 -2 6 15 3.58 0.9
 -2 6 -16 26.35 1.58
 -2 6 16 28.9 1.85
 2 -6 16 25.91 1.91
 -2 -6 16 25.68 1.84
 -2 6 -17 -0.07 0.36
 2 6 -17 0.47 0.47
 2 -6 17 0.87 0.72
 -2 -6 17 0.27 0.6
 -2 6 17 1.58 0.67
 -2 6 -18 0.16 0.31
 -2 -6 18 0.73 0.56
 2 6 -18 0.05 0.37
 -2 -6 19 0.75 0.48
 2 6 -19 0.06 0.27
 -2 8 1 0.03 0.3
 -2 -8 -1 -0.18 0.47
 -2 8 2 74.73 2.3
 -2 -8 -2 81.25 3.02
 -2 -8 -3 11.37 1.29
 -2 8 3 11.08 1.15
 -2 -8 -4 213.95 5.54
 -2 8 4 203.72 4.74
 2 -8 -4 213.55 5.3
 2 -8 -5 7.55 1.21
 -2 -8 -5 6.35 1.18
 -2 8 5 6.5 1.12
 -2 8 6 90.31 3.86
 -2 -8 -6 86.6 3.89
 2 -8 -6 88.24 3.9
 2 -8 -7 7.59 1.31
 -2 -8 -7 8.12 1.43
 -2 -8 -8 13.33 1.78
 -2 -8 8 11.04 0.92
 2 -8 -8 11.34 1.51
 2 8 9 3.1 0.63
 2 -8 -9 2.12 0.77
 -2 8 9 2.54 0.51
 -2 8 9 2.31 0.6
 -2 -8 9 2.29 0.54
 2 -8 9 2.2 0.54
 -2 -8 -9 1.66 0.94
 -2 8 10 3.02 0.57
 2 8 10 3.42 0.66
 -2 8 10 2.1 0.46
 -2 -8 -10 4.51 1.17
 2 -8 10 3.39 0.6
 -2 -8 10 3.22 0.64
 -2 8 11 1.72 0.52
 -2 -8 -11 1.33 0.82
 -2 -8 11 1.07 0.51
 2 -8 11 0.56 0.51
 -2 8 11 0.98 0.49
 2 8 11 1.75 0.65
 2 -8 12 9.15 1.12
 -2 8 12 8.52 1.07
 -2 -8 12 9.78 1.12
 2 8 12 10.43 1.15
 -2 8 13 7.76 1.01
 2 8 13 9.62 1.16
 2 -8 13 7.58 1.09
 -2 -8 13 10.65 1.27
 2 8 14 74.65 2.91
 -2 -8 14 69.32 2.9
 -2 8 14 78.38 2.97
 2 -8 14 78.3 3.14
 -2 8 -14 71.78 2.62
 2 -8 15 10.94 1.33
 -2 8 15 10.87 1.28
 -2 -8 15 10.17 1.31
 -2 8 -15 11.66 1.19
 2 8 15 13.27 1.44
 2 -8 16 12.6 1.37
 -2 8 16 12.05 1.32
 -2 -8 16 9.99 1.18
 -2 8 -16 10.55 1.04
 -2 -8 17 0.32 0.57
 -2 8 -17 0.1 0.37
 -2 8 17 1.85 0.72
 2 -8 17 0.86 0.67
 2 8 -17 0.65 0.44
 2 8 -18 -0.17 0.35
 -2 -8 18 0.88 0.54
 -2 8 -18 -0.45 0.45
 -2 8 -19 -0.38 0.33
 -2 -8 19 0.52 0.46
 2 8 -19 -0.27 0.3
 2 10 0 0.15 0.14
 -2 10 1 1.8 0.46
 -2 -10 -1 2.25 0.77
 -2 -10 -2 2.61 0.77
 -2 10 2 2.53 0.55
 -2 10 3 30.19 1.75
 -2 -10 -3 32.72 2.25
 2 -10 -4 158.86 4.88
 -2 -10 -4 156.36 5.13
 -2 10 4 144.81 4.16
 2 -10 -5 43.05 2.78
 -2 10 5 40.27 2.47
 -2 -10 -5 43.41 2.88
 -2 10 6 215.55 6.08
 -2 -10 -6 219.53 6.55
 2 -10 -6 228.6 6.63
 2 -10 -7 17.36 1.98
 -2 -10 -7 16.54 1.92
 -2 -10 -8 6.44 1.33
 -2 -10 8 5.84 0.72
 2 -10 -8 4.58 1.09
 2 -10 8 6.25 0.77
 -2 10 9 0.61 0.43
 -2 -10 -9 0.9 0.72
 -2 10 9 -0.18 0.42
 2 -10 9 0.03 0.39
 2 10 9 0.68 0.47
 2 -10 -9 -0.1 0.5
 -2 -10 9 0.41 0.44
 -2 10 10 0.04 0.41
 -2 10 10 -0.52 0.54
 -2 -10 -10 0.3 0.69
 -2 -10 10 0.21 0.45
 2 -10 10 -0.41 0.71
 2 10 10 0.18 0.52
 -2 10 11 -0.56 0.58
 -2 -10 -11 0.17 0.63
 -2 -10 11 0.02 0.47
 2 -10 11 -0.77 0.64
 2 10 11 0.69 0.59
 -2 10 11 0.19 0.37
 -2 -10 12 9.91 1.12
 -2 10 12 10.25 1.1
 2 10 12 11.09 1.19
 2 -10 12 9.06 1.11
 -2 10 -13 4.25 0.82
 2 10 13 4.63 0.93
 -2 10 13 4.58 0.86
 -2 -10 13 5.46 1.06
 2 -10 13 3.46 0.83
 2 10 14 51.28 2.43
 -2 10 14 52.66 2.41
 -2 -10 14 48.69 2.44
 -2 10 -14 55.08 2.29
 2 -10 14 58.79 2.73
 -2 10 15 10.06 1.24
 -2 10 -15 9.73 1.1
 2 -10 15 7.02 1.11
 -2 -10 15 5.79 1.01
 -2 -10 16 23.04 1.73
 2 -10 16 23.88 1.82
 -2 10 -16 24.84 1.55
 -2 10 16 26.08 1.77
 -2 -10 17 0.81 0.6
 -2 10 -17 1.57 0.55
 2 10 -17 0.78 0.56
 2 -10 17 1.38 0.76
 2 10 -18 0.23 0.36
 -2 10 -18 0.03 0.39
 2 10 -19 -0.45 0.36
 -2 10 -19 -0.56 0.36
 2 12 0 62.2 1.34
 -2 12 0 66.47 2.23
 2 12 1 16.2 0.96
 -2 12 1 13.21 1.04
 -2 -12 -1 16.37 1.56
 -2 -12 -2 0 0.52
 -2 12 2 0.02 0.38
 -2 -12 -3 0.67 0.68
 -2 12 3 0.95 0.51
 -2 -12 -4 60.94 3.42
 -2 12 4 56.29 2.66
 2 -12 -4 59.61 3.24
 -2 12 5 22.06 1.84
 2 -12 -5 24.75 2.26
 -2 -12 -5 24.66 2.32
 -2 12 6 221.18 6.18
 -2 -12 -6 222.56 6.92
 2 -12 -6 230.95 7.08
 -2 -12 -7 8.54 1.58
 2 -12 -7 8.35 1.5
 2 -12 8 0.73 0.47
 -2 -12 8 -0.14 0.4
 -2 12 8 0.21 0.32
 2 -12 -8 0.59 0.72
 -2 -12 -8 0.46 0.71
 -2 12 9 2.25 0.52
 -2 12 9 1.32 0.42
 2 12 9 2.25 0.56
 -2 -12 -9 2.46 0.93
 2 -12 -9 2.95 1.09
 -2 -12 9 2.42 0.57
 2 -12 9 1.6 0.46
 2 -12 10 15.83 1.26
 -2 -12 -10 17.41 2.41
 -2 -12 10 15.85 1.29
 -2 12 10 15.23 1.17
 -2 12 10 15.64 1.15
 2 12 10 17.99 1.27
 2 -12 11 -0.51 0.72
 -2 -12 11 -0.08 0.52
 -2 -12 -11 -0.64 0.84
 2 12 11 0.72 0.61
 -2 12 11 0.09 0.46
 -2 12 11 -0.18 0.42
 2 12 12 1.22 0.63
 -2 12 12 -0.04 0.41
 2 -12 12 0.64 0.77
 -2 12 12 0.66 0.53
 -2 -12 12 0.76 0.76
 -2 12 13 3.61 0.86
 2 -12 13 1.72 0.72
 -2 12 -13 3.2 0.78
 -2 -12 13 2.99 0.88
 2 -12 14 3.32 0.92
 -2 12 -14 4.22 0.88
 -2 12 14 4.5 0.88
 2 -12 15 6.54 1.18
 -2 12 -15 6.55 1.01
 -2 -12 15 6.57 1.05
 -2 12 15 9.58 1.18
 -2 -12 16 4.25 0.87
 2 -12 16 4.65 0.96
 -2 12 -16 5.65 0.83
 2 12 -16 5.23 0.86
 2 -12 17 0.94 0.66
 -2 -12 17 -0.02 0.54
 2 12 -17 0.22 0.43
 -2 12 -17 0.1 0.4
 -2 12 -18 -0.01 0.41
 2 12 -18 0.2 0.36
 2 12 -19 -0.31 0.41
 -2 12 -19 -0.34 0.37
 -2 14 0 200.96 4.05
 2 14 0 177.66 2.5
 -2 -14 -1 27.58 2.18
 -2 14 1 26.38 1.54
 2 14 1 27.38 1.27
 -2 -14 -2 2.25 0.84
 -2 14 2 2.31 0.62
 -2 -14 -3 0.18 0.68
 -2 14 3 0.16 0.43
 -2 14 4 1.27 0.69
 -2 -14 -4 1.35 0.81
 2 -14 -4 1.01 0.68
 -2 14 5 20.7 1.84
 2 -14 -5 19.28 2.13
 -2 -14 -5 20.86 2.26
 -2 14 6 4.67 1.17
 -2 -14 -6 5.05 1.29
 2 -14 -6 3.68 1.21
 2 -14 -7 -0.15 0.64
 -2 14 7 0.39 0.31
 -2 -14 -7 -0.28 0.66
 -2 -14 8 7.1 0.82
 2 -14 -8 7.61 1.61
 2 14 8 5.63 0.64
 2 -14 8 6.25 0.79
 -2 -14 -8 8.61 1.73
 -2 14 8 6.99 0.83
 -2 -14 9 24.79 1.57
 2 -14 9 24.2 1.55
 -2 -14 -9 26.14 2.83
 -2 14 9 25.37 1.41
 2 -14 -9 26.97 2.8
 -2 -14 -10 19.74 2.59
 2 -14 10 19.64 1.42
 -2 -14 10 20.84 1.51
 -2 14 10 18.86 1.27
 -2 14 11 3.2 0.65
 -2 14 11 3.62 0.69
 2 -14 11 3.12 0.71
 -2 -14 -11 4.04 1.24
 -2 -14 11 4.24 0.84
 -2 -14 12 0.82 0.66
 -2 14 12 1.28 0.6
 -2 14 12 -0.12 0.46
 2 -14 12 0.25 0.61
 -2 -14 13 1.64 0.71
 2 -14 13 0.85 0.72
 -2 14 -13 2.19 0.78
 -2 14 13 3.7 0.85
 -2 -14 14 7.87 1.1
 2 -14 14 9.38 1.2
 -2 14 -14 9.56 1.1
 -2 14 14 9.52 1.12
 -2 -14 15 1.93 0.73
 -2 14 -15 1.99 0.6
 2 -14 15 2.22 0.77
 -2 -14 16 0.66 0.55
 -2 14 -16 0.16 0.44
 2 14 -16 0.07 0.55
 2 -14 16 0.73 0.65
 -2 -14 17 -0.15 0.49
 2 -14 17 0.4 0.56
 -2 14 -17 0.09 0.4
 2 14 -17 -0.13 0.48
 -2 14 -18 4.23 0.65
 -2 -14 18 4.76 0.85
 2 14 -18 5.27 0.71
 -2 16 0 73.79 2.66
 2 16 0 60.82 1.58
 -2 16 1 22.31 1.51
 -2 -16 -1 23.91 2.25
 -2 16 -1 22.74 1.52
 -2 -16 -2 2.07 0.84
 2 16 -2 1.32 0.23
 -2 16 2 1.37 0.56
 -2 -16 -3 1.51 0.91
 -2 16 3 2.14 0.66
 -2 -16 -4 1.09 0.87
 2 -16 -4 0.62 0.71
 -2 16 4 1.56 0.71
 -2 16 5 12.52 1.54
 -2 -16 -5 12.89 1.93
 2 -16 -5 11.07 1.77
 -2 16 6 1.03 0.84
 -2 16 6 0.16 0.34
 -2 -16 -6 0.32 0.78
 2 -16 -6 0.09 0.75
 2 -16 -7 10.45 1.9
 -2 -16 7 7.34 0.8
 -2 -16 -7 11.11 1.87
 2 16 7 7.24 0.74
 -2 16 7 9.07 0.82
 -2 -16 -8 47.55 3.89
 2 16 8 37.12 1.63
 2 -16 -8 48.88 3.92
 2 -16 8 38.74 1.85
 -2 -16 8 44.71 1.97
 -2 16 8 35.41 1.6
 -2 16 8 50.12 1.88
 -2 16 9 27.54 1.51
 2 16 9 21.33 1.28
 -2 -16 -9 28.48 3.04
 2 -16 -9 27.66 3.04
 -2 -16 9 27.2 1.67
 2 -16 9 25.08 1.57
 2 -16 10 51.37 2.3
 -2 -16 10 50.9 2.36
 -2 16 10 49.9 2.11
 -2 -16 -10 47.45 4.15
 2 -16 -10 45.69 3.94
 -2 -16 -11 6.27 1.7
 -2 16 11 5.11 0.85
 2 -16 11 5.33 0.92
 -2 -16 11 5.09 0.94
 -2 16 -12 9.88 1.08
 -2 16 12 8.04 0.95
 -2 -16 12 9.54 1.18
 2 -16 12 8.77 1.13
 -2 -16 13 -2.05 0.89
 2 -16 13 -0.51 0.68
 -2 16 -13 -0.03 0.55
 -2 -16 14 -0.72 0.7
 2 -16 14 0.68 0.62
 2 -16 15 0.7 0.66
 -2 16 -15 -0.23 0.59
 -2 -16 15 -0.68 0.69
 -2 16 -16 -0.3 0.52
 2 -16 16 0.37 0.59
 2 16 -16 -0.32 0.54
 -2 -16 16 -0.53 0.65
 -2 -16 17 4.68 0.84
 2 16 -17 4.91 0.77
 -2 16 -17 4.91 0.76
 -2 16 -18 5.67 0.75
 2 16 -18 6.53 0.76
 -2 -16 18 7.43 0.92
 -2 18 0 11.65 1.14
 -2 18 1 17.76 1.43
 -2 -18 -1 19.32 2.13
 -2 18 -1 17.94 1.41
 -2 18 2 2.85 0.69
 -2 -18 -2 3.09 1.02
 -2 -18 -3 -0.2 0.68
 -2 18 3 0.62 0.57
 -2 -18 -4 32.03 3.01
 -2 18 4 28.94 2.15
 2 -18 -4 30.1 2.8
 -2 18 5 1.13 0.66
 -2 18 5 1.38 0.41
 -2 -18 -5 0.52 0.81
 2 -18 -5 1.4 1
 2 18 6 2.73 0.54
 -2 18 6 3.29 1
 -2 -18 -6 3.07 1.2
 -2 18 6 2.82 0.55
 2 -18 -6 3.24 1.16
 -2 -18 7 7.43 0.82
 2 -18 -7 10.01 1.9
 2 18 7 9.49 0.87
 -2 -18 -7 9.88 1.89
 -2 18 7 10.5 0.91
 2 -18 -8 34.79 3.43
 2 18 8 32.01 1.57
 -2 -18 8 31.96 1.74
 -2 -18 -8 36.16 3.53
 -2 18 8 32.87 1.61
 -2 18 9 50.11 2.06
 2 -18 -9 50.85 4.24
 -2 -18 -9 50.06 4.17
 -2 -18 9 46.7 2.19
 2 -18 9 40.35 1.99
 2 18 9 41.98 1.86
 2 -18 10 17.63 1.42
 2 -18 -10 15.55 2.52
 -2 18 10 17.48 1.36
 -2 -18 -10 16.25 2.62
 -2 -18 10 19.98 1.52
 -2 18 11 19.55 1.47
 -2 -18 11 19.23 1.6
 2 -18 11 18 1.5
 -2 -18 -11 18.15 2.73
 -2 18 -12 0.31 0.52
 -2 -18 12 0.15 0.63
 -2 18 12 0.71 0.62
 2 -18 12 -0.87 0.66
 -2 18 13 0.24 0.43
 -2 -18 13 0.18 0.73
 -2 18 -13 0.93 0.59
 2 -18 13 0.25 0.54
 2 -18 14 1.74 0.71
 -2 -18 14 0.84 0.59
 -2 18 -14 1.52 0.64
 2 18 -15 0.42 0.58
 -2 18 -15 1.35 0.57
 2 -18 15 1.13 0.67
 -2 -18 15 0.47 0.6
 -2 18 -16 1.14 0.44
 2 -18 16 1.43 0.69
 -2 -18 16 0.11 0.5
 2 18 -16 1.43 0.55
 -2 18 -17 3.06 0.61
 -2 -18 17 3.18 0.75
 2 18 -17 2.79 0.62
 -2 -18 18 8.91 0.95
 2 18 -18 10.38 0.9
 -2 18 -18 10.33 0.95
 -2 20 0 57.09 2.62
 -2 20 -1 4.35 0.78
 -2 20 1 4.49 0.79
 -2 -20 -1 3.56 1.17
 -2 20 2 0.2 0.39
 -2 -20 -2 -0.19 0.79
 -2 20 -2 0.01 0.35
 -2 -20 -3 6.49 1.47
 -2 20 3 5.91 0.99
 2 -20 -4 12.84 2.03
 -2 20 4 11.95 1.45
 -2 20 4 11.03 0.84
 2 -20 -5 0.36 0.64
 -2 20 5 0.44 0.31
 -2 20 5 0.9 0.65
 -2 -20 -5 0.07 0.94
 -2 20 6 1.46 0.91
 -2 -20 -6 2.78 1.34
 2 -20 -6 1.7 1.08
 2 20 6 1.38 0.45
 -2 20 6 0.86 0.41
 -2 20 6 1.11 0.41
 2 -20 -7 2.67 1.13
 -2 20 7 2.46 0.56
 2 20 7 2.25 0.54
 -2 -20 -7 2.28 0.99
 -2 -20 -8 7.55 1.77
 2 20 8 8.33 0.9
 -2 20 8 7.23 0.82
 -2 -20 8 6.82 0.88
 2 -20 -8 6.67 1.75
 -2 -20 -9 22.84 2.98
 -2 20 9 23.67 1.52
 -2 -20 9 21.98 1.57
 2 20 9 22.23 1.47
 2 -20 -9 22.22 3
 -2 20 -10 19.26 1.36
 -2 -20 -10 17.02 2.67
 -2 20 10 18.36 1.38
 2 20 10 15.9 1.25
 2 -20 -10 14.35 2.41
 -2 -20 10 18.32 1.48
 -2 -20 11 3.7 0.88
 -2 20 11 2.93 0.73
 -2 20 -11 4.1 0.84
 -2 -20 -11 1.61 0.95
 -2 20 12 7.05 1.01
 -2 20 -12 8.96 1.08
 2 -20 12 7.39 1.04
 -2 -20 12 7.74 1.14
 -2 20 13 0.23 0.47
 2 -20 13 2.01 0.74
 -2 20 -13 1.32 0.61
 -2 -20 13 -0.24 0.65
 2 -20 14 2.85 0.76
 -2 -20 14 1.6 0.62
 -2 20 -14 2.62 0.67
 -2 20 -15 1.82 0.61
 -2 -20 15 1.98 0.7
 2 20 -15 2.19 0.66
 2 -20 15 2.57 0.76
 -2 -20 16 0.89 0.59
 2 20 -16 0.58 0.47
 -2 20 -16 -0.03 0.48
 -2 -20 17 1.24 0.54
 -2 20 -17 1.44 0.48
 2 20 -17 1.55 0.5
 -2 20 -18 3.23 0.54
 2 20 -18 2.57 0.49
 -2 -22 0 22.38 2.54
 -2 22 0 19.71 1.64
 -2 22 1 14.13 1.45
 -2 -22 -1 16.27 2.27
 -2 22 -1 14.33 1.39
 -2 22 -2 0.8 0.46
 -2 22 2 0.56 0.53
 -2 -22 -2 0.14 0.75
 -2 22 3 22.8 1.95
 -2 -22 -3 23.16 2.73
 -2 22 -3 23.11 1.87
 -2 22 4 10.66 1.43
 2 -22 -4 10.97 2.02
 -2 22 4 8.88 0.83
 -2 -22 -4 12.31 2.14
 -2 22 4 9.82 0.85
 -2 22 5 35.51 1.57
 -2 22 5 42.21 1.75
 -2 22 5 46.53 3.13
 -2 22 -5 39.4 1.62
 2 -22 -5 47.95 3.96
 -2 -22 -5 49.58 4.14
 -2 22 6 6.35 0.78
 -2 22 6 6.57 1.43
 2 22 6 6.18 0.77
 -2 22 -6 6.83 0.8
 -2 -22 -6 5.81 1.61
 2 -22 -6 7.24 1.87
 2 22 7 7.06 0.84
 -2 22 7 6.82 0.81
 2 -22 -7 7.09 1.77
 -2 22 -7 7.45 0.89
 -2 -22 -7 6.25 1.68
 2 22 8 -0.07 0.46
 -2 22 -8 0.13 0.46
 -2 -22 -8 0.22 0.69
 2 -22 -8 -0.13 0.84
 -2 22 8 0.1 0.5
 2 22 9 1.73 0.58
 -2 22 -9 1.44 0.59
 -2 22 9 1.12 0.46
 2 -22 -9 1.14 1.15
 -2 -22 -9 1.25 1.1
 2 22 10 0.97 0.48
 2 -22 -10 0.81 0.97
 -2 -22 -10 0.85 0.91
 -2 22 -10 1.15 0.55
 -2 22 10 1.09 0.54
 -2 22 11 9.47 1.14
 -2 -22 11 9.56 1.16
 -2 22 -11 11.17 1.11
 -2 -22 12 2.1 0.65
 -2 22 -12 3.74 0.71
 -2 22 12 4.58 0.87
 -2 22 13 0.29 0.5
 -2 22 -13 0.9 0.53
 -2 -22 13 0.7 0.57
 -2 22 -14 5.5 0.88
 2 22 -14 6.94 0.97
 -2 -22 14 5.78 1.04
 -2 22 -15 10.08 1.06
 -2 -22 15 7.13 1.03
 2 22 -15 10.04 1.12
 2 22 -16 0.75 0.47
 -2 22 -16 0.48 0.41
 -2 22 -17 0.28 0.36
 2 22 -17 0.56 0.39
 -2 -24 0 7.47 1.69
 -2 24 1 3.37 0.81
 -2 -24 -1 3.89 1.27
 -2 24 1 3.26 0.54
 -2 -24 -2 2.31 1.18
 -2 24 2 1.63 0.66
 -2 24 2 1.72 0.45
 2 -24 -3 55.04 4.32
 -2 24 3 43.67 1.77
 -2 -24 -3 52.7 4.29
 -2 24 3 48.92 1.86
 -2 24 3 46.27 2.83
 -2 -24 -4 54.9 4.59
 -2 24 4 47.9 3.11
 -2 24 4 46.26 1.89
 -2 24 4 42.22 1.76
 2 -24 -4 51.16 4.3
 -2 24 -5 64.19 2.06
 2 -24 -5 76.72 5.29
 -2 -24 -5 86.98 5.68
 -2 24 5 77.75 2.43
 -2 24 5 63.99 2.19
 -2 24 5 77.58 4.14
 2 -24 -6 34.85 3.8
 2 24 6 34.62 1.77
 -2 24 6 36.07 1.78
 -2 24 -6 37.34 1.7
 -2 -24 -6 36.67 3.87
 -2 24 7 22.6 1.43
 2 24 7 22.21 1.46
 2 -24 -7 20.31 2.98
 -2 -24 -7 22.06 2.99
 -2 24 -7 23.57 1.4
 2 24 8 2.59 0.64
 2 -24 -8 1.3 1.03
 -2 -24 -8 1.92 1.22
 -2 24 -8 2.6 0.64
 -2 24 8 2.67 0.65
 2 -24 -9 -0.14 0.73
 -2 24 9 -0.09 0.55
 -2 24 -9 0.66 0.48
 2 24 9 0.64 0.53
 -2 -24 -9 -0.81 0.87
 -2 24 -10 1.3 0.52
 2 24 10 1.34 0.52
 2 -24 -10 0.64 0.66
 -2 -24 -10 0.57 0.78
 -2 24 10 1.03 0.61
 -2 24 11 2.87 0.7
 -2 -24 -11 0.98 0.84
 2 24 11 2.22 0.57
 -2 24 -11 2.95 0.73
 -2 24 12 0.69 0.56
 -2 24 -12 0.58 0.45
 -2 24 -13 20.42 1.44
 2 24 -13 20.81 1.54
 -2 24 -14 6.17 0.88
 2 24 -14 6.69 0.95
 -2 24 -15 21.06 1.41
 2 24 -15 22.13 1.52
 2 24 -16 5.17 0.77
 -2 24 -16 4.45 0.69
 2 24 -17 2.14 0.54
 -2 24 -17 1.75 0.45
 -2 -26 0 0.13 1
 -2 -26 1 -0.72 1.01
 -2 26 1 0.19 0.36
 -2 -26 -1 -0.09 0.77
 -2 26 2 1.86 0.49
 -2 -26 -2 2.59 1.29
 -2 26 3 50.79 1.99
 -2 26 3 48.56 1.93
 -2 -26 -3 55.79 4.68
 2 -26 -3 55.14 4.62
 2 -26 -4 25.16 3.22
 -2 -26 -4 25.33 3.33
 -2 26 4 26.1 1.5
 -2 26 4 22.37 1.35
 2 -26 -5 108.99 6.66
 2 26 5 113.46 3.13
 -2 -26 -5 112.58 6.82
 -2 26 5 113.06 3.08
 -2 26 6 11.09 1.09
 2 -26 -6 10.79 2.41
 -2 -26 -6 10.76 2.31
 2 26 6 11.52 1.17
 -2 26 -6 10.78 0.95
 2 -26 -7 40.9 4.31
 -2 26 -7 49.67 1.98
 -2 -26 -7 41.57 4.3
 2 26 7 48.82 2.2
 -2 26 7 48.38 2.16
 -2 26 -8 0.51 0.43
 -2 26 8 0.27 0.48
 2 -26 -8 -0.09 0.83
 2 26 8 -0.07 0.47
 -2 -26 -8 -0.12 0.87
 2 26 9 4.91 0.82
 -2 26 9 4.08 0.71
 -2 26 -9 4.6 0.75
 -2 -26 -9 3.65 1.54
 2 -26 -9 2.68 1.42
 -2 -26 -10 0.01 0.72
 -2 26 10 0.52 0.54
 2 26 10 0.29 0.54
 -2 26 -10 0.01 0.46
 2 26 11 8.54 1.03
 -2 26 -11 8.46 0.97
 -2 26 11 8.69 1.09
 -2 26 12 4.57 0.87
 2 26 -12 4.39 0.85
 -2 26 -12 4.74 0.8
 2 26 -13 12.14 1.21
 -2 26 -13 10.34 1.04
 -2 26 13 8.65 1
 2 26 -14 16.13 1.33
 -2 26 -14 13.59 1.18
 2 26 -15 23.46 1.49
 -2 26 -15 23.35 1.44
 -2 26 -16 2.17 0.54
 2 26 -16 3.44 0.63
 -2 28 0 0.65 0.45
 -2 -28 0 0.15 0.78
 -2 -28 1 -0.59 1.07
 -2 -28 -1 1.51 1.36
 -2 28 1 0.63 0.41
 -2 -28 -2 2.66 1.27
 -2 -28 2 1.7 1.02
 2 -28 -2 0.21 0.92
 -2 28 2 2.09 0.54
 -2 28 3 33.02 1.66
 2 -28 -3 36.7 4.08
 -2 -28 3 36.84 4.05
 -2 28 3 33.36 1.74
 -2 -28 -3 33.25 3.86
 -2 -28 -4 11.65 2.4
 -2 28 4 11.83 1.05
 2 -28 -4 12.59 2.52
 -2 28 4 14.27 1.2
 -2 28 5 37.56 1.85
 2 28 5 37.89 1.94
 2 -28 -5 36.92 4.19
 -2 -28 -5 35.93 4.05
 2 28 6 10.66 1.18
 -2 28 6 10.52 1.12
 -2 -28 -6 7.27 1.9
 2 -28 -6 8.74 2.17
 -2 28 -7 8.31 0.88
 -2 28 7 9.39 1.05
 -2 -28 -7 6.04 1.93
 2 -28 -7 6.71 1.99
 2 28 7 10.25 1.15
 -2 28 -8 1.32 0.49
 -2 28 8 0.83 0.65
 -2 -28 -8 1.07 0.99
 2 -28 -8 0.9 1.09
 2 28 8 0.58 0.53
 2 28 9 2.96 0.69
 -2 28 9 2.44 0.64
 2 -28 -9 1.08 0.72
 -2 -28 -9 1.84 1.25
 -2 28 -9 2.75 0.61
 2 28 10 -0.08 0.5
 -2 28 -10 -0.07 0.39
 2 28 -10 0.28 0.41
 -2 28 10 -0.08 0.63
 -2 28 -11 1.32 0.51
 2 28 11 1.33 0.55
 2 28 -11 2.07 0.61
 -2 28 11 1.33 0.57
 2 28 -12 1.88 0.63
 -2 28 12 0.97 0.55
 -2 28 -12 1.35 0.52
 2 28 -13 24.03 1.59
 -2 28 13 19.51 1.43
 -2 28 -13 23.11 1.46
 -2 28 -14 3.7 0.69
 2 28 -14 4.58 0.74
 2 28 -15 25.47 1.45
 -2 28 -15 26.32 1.46
 2 28 -16 0.43 0.34
 -2 28 -16 0.9 0.42
 -2 -30 0 1.49 1.31
 -2 30 0 3.19 0.64
 -2 30 1 8.31 0.93
 -2 -30 1 7.13 2.03
 -2 -30 -1 5.35 1.8
 -2 -30 2 -0.5 0.93
 -2 30 2 0.52 0.5
 -2 -30 -2 0.27 1.03
 -2 30 2 0.25 0.41
 2 -30 -2 -0.84 1.37
 2 -30 -3 11.57 2.58
 -2 30 3 8.82 0.99
 -2 -30 -3 9.09 2.36
 -2 30 3 8.21 0.89
 -2 -30 3 9.27 2.22
 -2 -30 4 -0.47 0.82
 -2 30 4 -0.2 0.5
 2 -30 -4 -0.75 0.86
 -2 -30 -4 -0.86 1.02
 2 30 5 19.34 1.46
 2 -30 -5 17.19 2.99
 -2 30 5 20.56 1.49
 -2 -30 -5 17.01 2.97
 2 30 6 0.87 0.57
 2 -30 -6 0.44 1.23
 -2 30 6 -0.05 0.53
 -2 -30 -6 -0.42 1.09
 -2 -30 -7 0.81 1.11
 2 -30 -7 1.51 1.09
 -2 30 7 0.9 0.51
 2 30 7 1.55 0.69
 -2 30 8 -1.26 0.69
 2 -30 -8 0.74 1.11
 2 30 -9 20.93 1.39
 -2 30 9 22.49 1.6
 2 30 9 22.11 1.61
 -2 30 -9 19.19 1.34
 2 30 -10 2.02 0.62
 -2 30 -10 1.82 0.54
 2 30 10 2.89 0.78
 -2 30 10 2.65 0.79
 -2 30 11 3.33 0.74
 2 30 11 3.1 0.68
 2 30 -11 3.97 0.7
 -2 30 -11 3.15 0.59
 -2 30 -12 0.07 0.39
 2 30 -12 -0.28 0.4
 -2 30 12 -0.77 0.61
 -2 30 13 7.56 0.91
 2 30 -13 10.46 0.99
 -2 30 -13 7.83 0.88
 -2 30 -14 1.34 0.48
 2 30 -14 2.09 0.56
 -2 30 -15 6.07 0.72
 2 30 -15 5.59 0.69
 -2 32 0 5.71 0.89
 -2 -32 0 5.13 1.94
 -2 32 1 69.57 2.48
 -2 32 -1 69.3 2.48
 2 -32 -1 70.76 6.38
 -2 -32 1 68.48 6.17
 -2 -32 -1 64.85 6.03
 -2 -32 -2 -0.54 1.31
 2 -32 -2 0.61 1.11
 -2 32 2 1.55 0.76
 -2 32 2 -0.02 0.51
 -2 -32 2 1.24 1.03
 -2 32 3 13.24 1.13
 -2 -32 3 12.2 2.67
 -2 -32 -3 12.12 2.71
 -2 32 3 13.99 1.34
 2 -32 -3 14.03 2.84
 2 -32 -4 0.49 1.16
 -2 -32 -4 -1.29 1.31
 -2 32 4 -0.08 0.5
 2 32 4 0.43 0.68
 -2 -32 4 -0.27 1.17
 2 -32 -5 3.69 1.79
 2 32 5 3.05 0.77
 -2 -32 -5 1.8 1.41
 -2 32 5 1.79 0.56
 2 -32 -6 0.02 0.8
 -2 -32 -6 1.37 1.03
 -2 32 6 0.49 0.57
 2 32 6 1.64 0.67
 -2 32 7 -0.47 0.71
 2 32 7 -1.24 0.65
 -2 32 8 1.96 0.63
 2 32 8 3.19 0.8
 -2 32 9 52.11 2.48
 2 32 9 50.58 2.43
 2 32 10 5.5 0.92
 -2 32 10 4.44 0.96
 -2 32 -10 3.03 0.63
 2 32 11 22.01 1.54
 2 32 -11 20.38 1.33
 -2 32 11 23.22 1.64
 -2 32 -11 21.76 1.38
 -2 32 12 0.14 0.45
 -2 32 -12 -0.21 0.37
 2 32 -12 0.2 0.33
 -2 32 -13 -0.22 0.37
 -2 32 13 -0.56 0.42
 2 32 -13 -0.05 0.32
 -2 32 -14 0.19 0.3
 2 32 -14 -0.52 0.36
 2 -34 0 4.65 2.08
 -2 34 0 5.29 0.87
 -2 -34 0 2.96 1.61
 -2 34 1 95.3 3.25
 -2 34 1 94.26 2.96
 -2 34 -1 93.75 3
 2 -34 -1 96.29 7.86
 2 -34 1 92.43 7.86
 -2 -34 1 85.36 7.28
 -2 -34 -1 93.54 7.6
 2 -34 -2 5.28 2.09
 -2 34 -2 6.29 0.95
 -2 34 2 4.8 0.81
 -2 -34 -2 6 2.21
 -2 34 2 6.68 1.14
 -2 -34 2 4.94 1.89
 -2 -34 -3 4.47 1.98
 -2 -34 3 5.38 1.99
 2 -34 -3 4.12 2
 -2 34 3 5.91 0.99
 2 34 4 0.74 0.62
 -2 -34 -4 0.24 0.98
 -2 34 4 -0.26 0.63
 2 -34 -4 0.74 1.39
 2 34 5 0.73 0.63
 -2 34 5 0.18 0.57
 -2 34 6 0.03 0.52
 2 34 6 0.73 0.61
 2 34 7 8.65 1.06
 -2 34 7 7.67 0.99
 2 34 8 1.13 0.66
 -2 34 8 1.44 0.67
 -2 34 9 69.45 2.85
 2 34 9 63.87 2.74
 2 34 10 4.16 0.88
 -2 34 10 5.49 1
 2 34 11 25.12 1.6
 -2 34 11 30.79 1.83
 -2 34 12 0.71 0.47
 -2 34 13 2.58 0.54
 -2 36 0 6.57 1.14
 -2 36 0 4.95 0.85
 -2 36 1 141.56 3.95
 -2 36 -1 129.44 3.53
 -2 36 -1 141.93 3.93
 -2 36 1 130.61 3.57
 -2 36 -2 0.58 0.51
 -2 36 2 1.14 0.8
 -2 36 3 5.15 0.93
 2 36 3 6.22 1.1
 -2 36 -3 6.29 0.91
 2 36 4 1.32 0.72
 -2 36 4 0.6 0.57
 -2 36 5 11.59 1.2
 2 36 5 13.49 1.35
 -2 36 6 0.04 0.66
 2 36 6 1.32 0.6
 -2 36 7 0.84 0.62
 2 36 7 0.87 0.56
 -2 36 8 1.04 0.58
 2 36 8 0.85 0.56
 -2 36 9 50.89 2.38
 2 36 9 48.44 2.32
 2 36 10 2.72 0.7
 -2 36 10 2.59 0.72
 -2 36 11 30.74 1.77
 2 36 11 24.33 1.5
 -2 36 12 0.57 0.4
 -2 38 0 3.22 0.78
 -2 38 0 4.78 1.14
 -2 38 -1 23.94 1.73
 -2 38 -1 20.36 1.46
 -2 38 1 22.78 1.72
 2 38 2 0.55 0.64
 -2 38 -2 0.3 0.47
 -2 38 -2 1.05 0.74
 -2 38 2 -0.55 0.56
 -2 38 -3 1.77 0.69
 2 38 3 1.91 0.75
 -2 38 3 0.96 0.62
 -2 38 -3 1.53 0.61
 -2 38 -4 0.31 0.51
 2 38 4 0.63 0.75
 -2 38 4 0.13 0.57
 2 38 5 6.94 0.99
 -2 38 5 5.84 0.9
 -2 38 6 -0.03 0.73
 2 38 6 0.22 0.51
 2 38 7 0.99 0.54
 -2 38 7 0.74 0.55
 2 38 8 0.06 0.5
 -2 38 8 0.52 0.55
 2 38 9 17.01 1.36
 -2 38 9 17.79 1.44
 2 38 10 1.19 0.47
 -2 38 10 1.07 0.58
 2 38 11 5.15 0.7
 -2 38 11 6.78 0.83
 -2 40 0 1.84 0.81
 -2 40 -1 7.51 1.05
 -2 40 1 6.99 1.06
 -2 40 -1 5.63 0.82
 2 40 1 8.16 1.18
 -2 40 2 0.73 0.59
 2 40 2 0.56 0.62
 -2 40 -2 -0.61 0.53
 -2 40 -2 0.31 0.45
 -2 40 -3 17.09 1.41
 -2 40 3 17.74 1.48
 -2 40 -3 17.44 1.34
 2 40 3 18.8 1.52
 2 40 4 1.64 0.71
 -2 40 4 1.38 0.64
 -2 40 -4 1.77 0.61
 -2 40 -4 2.26 0.74
 2 40 5 28.98 1.86
 -2 40 5 26.53 1.73
 -2 40 -5 28.06 1.66
 2 40 6 0.53 0.56
 -2 40 6 0.15 0.49
 -2 40 -6 1.57 0.61
 2 40 7 0.54 0.5
 -2 40 7 1.55 0.56
 2 40 8 -0.08 0.5
 -2 40 8 0.18 0.52
 2 40 9 2.61 0.64
 -2 40 9 4.13 0.73
 2 40 10 0.37 0.38
 -2 40 10 0.55 0.38
 2 42 0 1.03 0.64
 -2 42 0 0.02 0.53
 -2 42 -1 0.95 0.56
 2 42 -1 3.24 0.89
 -2 42 1 2.82 0.8
 2 42 1 2.44 0.81
 2 42 2 1.22 0.57
 -2 42 2 0.97 0.58
 -2 42 -2 0.31 0.48
 -2 42 -2 1.09 0.4
 -2 42 -3 19.34 1.33
 2 42 3 20.65 1.54
 -2 42 -3 19.55 1.43
 -2 42 3 20.25 1.53
 -2 42 4 3.54 0.8
 2 42 4 4.03 0.81
 -2 42 -4 3.52 0.71
 -2 42 -4 3.5 0.7
 2 42 5 42.16 2.13
 -2 42 -5 41.86 1.94
 -2 42 5 40.08 2.06
 -2 42 6 3.22 0.81
 -2 42 -6 2.45 0.64
 2 42 6 2.41 0.6
 2 42 7 6.72 0.89
 2 42 -7 5.88 0.73
 -2 42 7 7.93 0.98
 -2 42 -7 7.72 0.87
 -2 42 -8 0.64 0.44
 2 42 -8 -0.37 0.34
 2 42 8 0.1 0.42
 -2 42 8 0.08 0.39
 2 42 9 0.24 0.37
 -2 42 9 -0.38 0.38
 -2 42 -9 0.81 0.39
 2 44 0 0.41 0.49
 -2 44 0 -0.17 0.52
 -2 44 -1 0.02 0.45
 2 44 1 -0.38 0.49
 2 44 -1 0.51 0.57
 -2 44 1 -0.38 0.55
 2 44 -2 0.72 0.55
 -2 44 2 0.15 0.5
 2 44 2 0.54 0.49
 -2 44 -2 -0.06 0.47
 -2 44 -3 12.98 1.04
 -2 44 3 15.82 1.3
 -2 44 -3 13.92 1.18
 2 44 -3 16.22 1.32
 2 44 3 15.35 1.26
 2 44 4 3.24 0.68
 2 44 -4 3.56 0.81
 -2 44 -4 2.12 0.52
 -2 44 4 2.78 0.67
 2 44 -5 27.78 1.59
 2 44 5 29.63 1.71
 -2 44 -5 27.35 1.46
 -2 44 5 30.76 1.76
 2 44 -6 3.98 0.65
 -2 44 6 4.39 0.75
 2 44 6 3.48 0.72
 -2 44 -6 4.22 0.66
 -2 44 -7 9.84 0.88
 -2 44 7 10.69 1.01
 -2 44 8 -0.3 0.4
 2 44 8 0.5 0.42
 -2 46 0 1.23 0.53
 2 46 0 2.02 0.59
 -2 46 1 1.47 0.51
 2 46 -1 1.69 0.58
 2 46 1 1.56 0.53
 -2 46 -1 1.61 0.55
 -2 46 -2 -0.19 0.42
 2 46 -2 0.31 0.44
 2 46 2 -0.64 0.53
 -2 46 2 -0.99 0.54
 2 46 3 4.26 0.7
 -2 46 -3 2.27 0.49
 2 46 -3 4.72 0.74
 -2 46 3 3.95 0.7
 2 46 -4 1.35 0.49
 2 46 4 1.15 0.46
 -2 46 5 16.9 1.22
 2 46 5 16.57 1.21
 -2 46 6 2.53 0.55
 2 46 6 3.09 0.61
 2 48 0 3.74 0.63
 -2 48 0 2.81 0.57
 2 48 -1 12.24 1.03
 -2 48 1 11.08 1.01
 2 48 1 11.25 1
 -2 48 2 1.06 0.46
 2 48 -2 0.62 0.42
 2 48 2 0.63 0.35
 -2 48 3 -0.36 0.39
 2 48 3 -0.42 0.39
 -3 -1 0 0.46 0.19
 -3 1 0 0.34 0.19
 -3 -1 -1 122.91 2.49
 -3 -1 1 125.22 2.06
 -3 1 -1 127.74 2.46
 -3 -1 1 128.68 1.57
 -3 1 -2 4.38 0.57
 -3 -1 2 4.47 0.52
 -3 -1 -2 3.87 0.54
 -3 -1 3 47.82 1.85
 -3 -1 -3 46.37 1.97
 3 -1 -3 49.04 1.34
 -3 1 -3 45.52 1.87
 3 1 -4 0.55 0.12
 3 -1 -4 0.92 0.28
 -3 -1 4 1.12 0.6
 -3 -1 -4 1.04 0.48
 -3 1 -4 1.16 0.54
 -3 -1 -5 1.37 0.49
 -3 1 -5 1.18 0.55
 3 -1 -5 1 0.32
 3 1 -5 0.66 0.19
 -3 1 5 0.7 0.68
 3 -1 -6 0.38 0.23
 -3 -1 -6 0.62 0.49
 3 1 -6 0.24 0.19
 -3 1 -6 0.41 0.5
 -3 1 -7 2.09 0.7
 3 -1 -7 1.81 0.42
 -3 -1 -7 2.64 0.81
 -3 1 -8 0.5 0.5
 -3 -1 -8 1.12 0.72
 3 1 9 63.75 2.19
 3 -1 9 67.4 2.26
 -3 -1 -9 64.43 3.61
 -3 -1 9 63.51 2.09
 -3 1 9 65.98 2.12
 -3 1 -9 63.77 3.53
 -3 1 -10 -0.12 0.55
 -3 1 10 0.38 0.4
 -3 -1 -10 0.48 0.48
 3 -1 10 0.29 0.42
 3 1 10 0.36 0.42
 -3 -1 10 0.19 0.38
 3 1 11 43.51 1.97
 -3 -1 -11 41.66 1.7
 -3 1 -11 44.14 3.3
 -3 -1 -11 45.06 3.37
 -3 -1 11 43.74 1.96
 3 -1 11 42.9 2.01
 -3 1 11 43.15 1.97
 -3 -1 12 0.71 0.56
 3 1 12 0.74 0.58
 3 -1 12 0.21 0.58
 -3 1 -12 0.68 0.5
 -3 -1 -12 0.56 0.47
 -3 1 12 0.73 0.59
 3 1 13 14.65 1.38
 -3 -1 13 16.24 1.43
 -3 1 13 12.16 1.14
 3 -1 13 15.7 1.38
 -3 1 -13 13.13 1.08
 -3 -1 -13 14.33 1.1
 3 -1 14 1.24 0.81
 -3 -1 -14 0.19 0.41
 -3 1 -14 0.05 0.4
 -3 -1 14 -1.59 0.79
 3 1 14 1.52 0.79
 -3 1 14 -0.89 0.87
 -3 -1 15 4.86 0.92
 -3 -1 -15 4.53 0.68
 -3 1 -15 5.09 0.74
 3 1 15 7.7 1.17
 3 -1 15 5.88 1.08
 -3 1 15 5.07 0.88
 -3 -1 16 -1.48 0.71
 3 -1 16 1.6 0.78
 -3 1 -16 0.18 0.36
 -3 1 16 -0.16 0.56
 3 1 16 2.2 0.85
 -3 -1 17 9.37 1.1
 3 1 -17 6.5 0.79
 -3 1 17 9.9 1.14
 -3 1 18 0.94 0.65
 -3 -1 18 0.97 0.58
 -3 1 19 6.93 0.9
 -3 -1 19 6.79 0.88
 -3 -3 0 10.04 0.69
 -3 -3 1 0.77 0.2
 -3 -3 1 1.61 0.25
 -3 -3 -1 1.05 0.35
 -3 3 -2 0.85 0.35
 -3 -3 2 0.72 0.31
 -3 -3 -2 0.71 0.4
 -3 -3 3 187.92 3.56
 -3 3 -3 189.53 3.81
 -3 -3 -3 185.93 4.04
 -3 -3 -4 9.41 1.09
 -3 3 -4 9.87 1.02
 3 -3 -4 10.18 0.93
 3 -3 -5 1.65 0.47
 -3 3 5 1.9 0.77
 -3 -3 -5 1.53 0.67
 -3 3 -5 1.2 0.51
 -3 -3 -6 0.03 0.46
 3 -3 -6 -0.04 0.3
 -3 3 6 0.55 0.82
 -3 3 -6 -0.14 0.4
 -3 -3 -7 29.79 2.27
 3 -3 -7 26.1 1.6
 -3 3 -7 28.88 2.08
 3 -3 -8 1.02 0.42
 -3 -3 -8 0.94 0.64
 -3 3 -8 0.8 0.52
 -3 3 -9 24.36 2.2
 -3 -3 -9 26.93 2.46
 3 -3 9 24.28 1.44
 -3 3 9 24.61 1.34
 -3 -3 9 21.97 1.25
 3 3 9 24.7 1.35
 3 3 10 0.67 0.42
 3 -3 10 1.5 0.54
 -3 -3 -10 1.31 0.72
 -3 -3 -10 1.07 0.37
 -3 3 10 0.78 0.47
 -3 3 10 1.35 0.49
 -3 -3 10 0.73 0.42
 3 3 11 7.11 0.88
 -3 -3 -11 6.41 0.73
 -3 -3 -11 7.65 1.5
 -3 3 11 7.64 0.92
 -3 -3 11 7.38 0.86
 3 -3 11 7.36 0.93
 -3 -3 -12 0.33 0.41
 -3 -3 12 0.44 0.52
 3 -3 12 -0.28 0.62
 -3 3 -12 -0.09 0.39
 -3 3 12 0.6 0.61
 3 3 12 0.56 0.59
 -3 -3 13 0.72 0.66
 -3 3 -13 0.69 0.45
 -3 -3 -13 -0.03 0.39
 -3 3 13 -0.26 0.72
 3 3 13 1.17 0.78
 3 -3 13 0.12 0.58
 -3 -3 14 -1.1 0.77
 3 -3 14 -0.05 0.63
 3 3 14 1.14 0.81
 -3 3 -14 0.02 0.4
 -3 3 14 -1.67 0.82
 -3 -3 15 0.28 0.61
 3 -3 15 0.35 0.63
 -3 3 15 0.52 0.61
 -3 3 -15 0.61 0.47
 -3 3 -16 -0.26 0.4
 3 -3 16 0.7 0.69
 -3 3 16 -0.32 0.57
 -3 -3 16 -0.1 0.62
 3 3 -17 1.31 0.47
 -3 3 17 2.07 0.7
 -3 3 -17 1.36 0.46
 -3 -3 17 2.93 0.75
 3 3 -18 0.2 0.32
 -3 -3 18 0.63 0.55
 -3 -3 19 5.39 0.92
 -3 -5 0 0.11 0.28
 -3 -5 1 61.92 1.77
 -3 -5 1 58.5 1.09
 -3 -5 -2 1.47 0.53
 -3 -5 2 1.79 0.29
 -3 -5 -3 240.27 5.03
 -3 -5 -4 15.35 1.42
 3 -5 -4 14.51 1.24
 -3 -5 -5 0.54 0.55
 3 -5 -5 0.33 0.45
 -3 5 5 0.39 0.47
 -3 5 6 2.44 0.96
 -3 -5 -6 2.95 0.84
 3 -5 -6 1.83 0.61
 3 -5 -7 0.18 0.37
 -3 -5 -7 -0.45 0.61
 3 -5 -8 4.27 0.83
 -3 -5 -8 5.04 1.18
 -3 -5 8 3.82 0.52
 -3 -5 9 -0.17 0.44
 -3 5 9 0.07 0.33
 -3 -5 -9 0.46 0.6
 3 -5 9 -0.42 0.51
 -3 5 9 0.08 0.37
 3 5 9 0.57 0.38
 -3 5 10 0.46 0.38
 3 5 10 0.3 0.44
 3 -5 10 0.38 0.46
 -3 -5 10 0 0.43
 -3 -5 -10 0.28 0.65
 -3 5 10 0.09 0.39
 -3 5 11 1.15 0.57
 -3 5 11 1.15 0.5
 -3 -5 11 0.18 0.44
 3 -5 11 0.65 0.53
 3 5 11 0.97 0.54
 -3 -5 -11 1.02 0.77
 3 5 12 1.27 0.72
 -3 5 -12 0.57 0.48
 -3 5 12 -1 0.69
 -3 -5 12 0.48 0.53
 3 -5 12 -0.39 0.57
 -3 5 -13 6.62 0.89
 3 -5 13 6.4 1.02
 -3 -5 13 5.32 0.97
 3 5 13 8.24 1.11
 -3 5 13 4.78 0.7
 3 5 14 1.97 0.88
 -3 -5 14 -0.45 0.8
 -3 5 14 -0.41 0.67
 -3 5 -14 1.21 0.57
 3 -5 14 0.52 0.66
 -3 5 15 5.51 0.92
 -3 5 -15 5.81 0.83
 -3 -5 15 3.54 0.79
 3 -5 15 6.25 1.04
 3 5 15 8.14 1.17
 -3 5 -16 -0.17 0.41
 -3 -5 16 -0.14 0.64
 3 -5 16 1 0.75
 -3 5 16 -0.38 0.5
 -3 5 17 1.28 0.68
 -3 -5 17 0.33 0.5
 3 5 -17 0.6 0.36
 -3 5 -17 0.34 0.37
 3 5 -18 0.02 0.33
 -3 5 -18 -0.01 0.32
 -3 -5 18 1 0.56
 -3 -5 19 1.06 0.52
 -3 -7 0 4.62 0.7
 -3 -7 1 101.08 2.62
 -3 -7 -1 103.88 3.14
 -3 -7 -2 0.18 0.47
 -3 -7 -3 110.5 3.64
 -3 -7 -4 10.64 1.31
 -3 7 4 11.14 1.21
 3 -7 -4 10.44 1.17
 -3 7 5 2.43 0.71
 -3 -7 -5 3.36 0.96
 3 -7 -5 3.05 0.82
 -3 -7 -6 0.16 0.57
 -3 7 6 1.27 0.92
 3 -7 -6 0.5 0.54
 3 -7 -7 11.88 1.42
 -3 -7 -7 13.3 1.73
 -3 -7 -8 0.21 0.65
 -3 -7 8 -0.11 0.35
 3 -7 -8 -0.46 0.44
 -3 -7 9 0.5 0.36
 -3 -7 -9 0.68 0.75
 -3 7 9 0.86 0.45
 3 -7 9 0.42 0.48
 -3 7 9 1.29 0.44
 3 7 9 1.26 0.48
 -3 -7 -10 2.03 0.93
 3 -7 10 1.1 0.49
 -3 7 10 1.9 0.52
 -3 7 10 2.16 0.54
 3 7 10 2.66 0.67
 -3 -7 10 1.55 0.53
 -3 -7 -11 51.1 3.88
 3 -7 11 47.3 2.22
 -3 -7 11 47.92 2.14
 3 7 11 52.21 2.25
 -3 7 11 44 1.87
 -3 7 11 50.51 2.18
 -3 7 12 0.99 0.54
 3 7 12 2.29 0.76
 -3 7 12 2.2 0.62
 -3 7 -12 1.1 0.49
 3 -7 12 1.37 0.62
 -3 -7 12 0.97 0.52
 -3 -7 13 18.74 1.55
 -3 7 13 17.07 1.44
 3 -7 13 21.25 1.65
 -3 7 -13 19.61 1.38
 3 7 13 21.21 1.58
 3 7 14 3.08 0.97
 -3 7 -14 3.7 0.78
 -3 -7 14 1.56 0.7
 3 -7 14 3.01 0.87
 -3 7 14 1.89 0.62
 -3 7 -15 26.04 1.58
 3 -7 15 25.28 1.87
 -3 -7 15 23.32 1.74
 -3 7 15 28.7 1.88
 -3 -7 16 0.46 0.61
 -3 7 -16 0.73 0.54
 -3 7 16 1.76 0.77
 3 -7 16 1.95 0.82
 -3 7 17 1.88 0.66
 3 7 -17 0 0.37
 -3 7 -17 0.27 0.36
 -3 -7 17 0.69 0.56
 3 -7 17 2.39 0.8
 -3 7 -18 0.07 0.35
 3 7 -18 0.17 0.39
 -3 -7 18 0.72 0.57
 -3 7 -19 0.17 0.25
 3 7 -19 0.54 0.34
 -3 -9 0 15.13 1.3
 -3 -9 -1 24.54 1.73
 -3 9 1 22.4 1.32
 -3 9 2 1.92 0.55
 -3 -9 -2 1.46 0.63
 -3 9 3 75.63 2.74
 -3 -9 -3 78.36 3.39
 -3 9 4 13.51 1.32
 -3 -9 -4 14.63 1.61
 3 -9 -5 68.95 3.35
 -3 -9 -5 64.8 3.41
 -3 9 5 64.62 3.04
 -3 9 6 1.95 0.87
 3 -9 -6 1.52 0.72
 -3 -9 -6 1.39 0.67
 3 -9 -7 81.52 3.95
 -3 -9 -7 84.34 4.12
 -3 9 7 83.7 4.08
 -3 -9 8 0.73 0.43
 3 -9 -8 0.78 0.61
 3 9 8 0.88 0.46
 3 -9 8 0.91 0.43
 -3 -9 -8 1.02 0.72
 3 9 9 4.55 0.73
 -3 -9 9 3.85 0.64
 3 -9 9 3.19 0.59
 -3 9 9 4.26 0.64
 -3 -9 -9 3.34 1.01
 -3 9 9 3.13 0.59
 -3 -9 -10 1.01 0.77
 3 9 10 3.24 0.73
 -3 9 10 1.45 0.51
 -3 9 10 1.11 0.45
 3 -9 10 1.32 0.48
 -3 -9 10 2.04 0.59
 3 -9 11 26.2 1.7
 -3 -9 11 27.39 1.65
 3 9 11 30.56 1.72
 -3 -9 -11 27.13 2.92
 -3 9 11 27.27 1.64
 -3 9 11 25.41 1.49
 -3 9 -12 9 0.94
 -3 -9 12 9.86 1.19
 -3 9 12 9.42 1.1
 -3 -9 -12 9.35 1.84
 3 -9 12 8.82 1.14
 3 9 12 12.75 1.24
 -3 9 12 9.69 0.98
 -3 -9 13 10.45 1.29
 -3 9 -13 10.29 1.07
 3 9 13 11.14 1.19
 3 -9 13 11.65 1.28
 -3 9 13 9.58 1.1
 -3 9 14 3.74 0.84
 -3 9 -14 4.64 0.83
 -3 -9 14 1.54 0.7
 3 -9 14 4.28 1
 3 -9 15 10.83 1.28
 -3 9 15 11.37 1.23
 -3 -9 15 8.56 1.1
 -3 9 -15 11.48 1.13
 -3 9 -16 0.91 0.51
 -3 9 16 1.62 0.67
 -3 -9 16 -0.07 0.66
 3 -9 16 1.82 0.87
 3 9 -17 15.6 1.25
 -3 9 -17 14.76 1.17
 3 -9 17 17.13 1.52
 -3 -9 17 12.79 1.31
 -3 9 17 16.07 1.38
 3 9 -18 0.8 0.43
 -3 -9 18 1 0.59
 -3 9 -18 -0.07 0.36
 -3 9 -19 2.28 0.46
 3 9 -19 1.45 0.38
 -3 -11 0 0.5 0.51
 -3 11 1 25.32 1.5
 -3 -11 -1 26.28 1.94
 -3 11 2 0.73 0.44
 -3 -11 -2 0.74 0.64
 -3 -11 -3 28.54 2.21
 -3 11 3 26.2 1.7
 -3 -11 -4 12.2 1.61
 -3 11 4 12.84 1.4
 -3 -11 -5 24.34 2.24
 3 -11 -5 23.28 2.09
 -3 11 5 23.1 1.9
 3 -11 -6 19.05 2.09
 -3 11 6 18.75 1.94
 -3 -11 -6 19.53 2.08
 -3 11 7 3.37 1.1
 3 -11 -7 2.12 0.84
 -3 -11 -7 2.07 0.79
 -3 -11 8 0.51 0.41
 -3 -11 -8 0.19 0.61
 -3 11 8 0.32 0.35
 3 -11 -8 0.24 0.56
 3 11 8 0.12 0.46
 3 -11 8 -0.2 0.38
 -3 11 9 29.13 1.49
 -3 11 9 25.58 1.38
 3 -11 -9 27.19 2.55
 3 -11 9 30.52 1.67
 3 11 9 31.36 1.59
 -3 -11 9 31.27 1.61
 -3 -11 -9 32.62 3.08
 -3 -11 -10 0.2 0.66
 3 -11 10 0.21 0.53
 -3 11 10 1.62 0.55
 -3 -11 10 1.38 0.53
 3 11 10 1.74 0.68
 -3 11 10 -0.08 0.53
 -3 -11 -11 0.84 0.73
 3 11 11 1.35 0.69
 -3 11 11 0.93 0.44
 -3 -11 11 1.06 0.5
 -3 11 11 0.82 0.44
 3 -11 11 0.54 0.55
 -3 -11 12 0.65 0.62
 -3 11 -12 0.85 0.5
 -3 -11 -12 0.84 0.92
 3 -11 12 0.21 0.62
 -3 11 12 0.29 0.58
 -3 11 12 1.46 0.55
 3 11 12 2.49 0.72
 -3 11 -13 15.82 1.29
 -3 11 13 14.46 1.35
 3 -11 13 14.14 1.47
 -3 -11 13 14.03 1.46
 -3 11 13 12.66 1.16
 3 -11 14 1.79 0.81
 -3 11 -14 0.66 0.57
 -3 11 14 1.44 0.67
 -3 11 15 8.77 1.13
 3 -11 15 6.63 1.09
 -3 -11 15 6.09 0.92
 -3 11 -15 7.72 0.96
 -3 11 -16 2.1 0.64
 3 -11 16 2.25 0.85
 -3 11 16 3.1 0.78
 -3 -11 16 0.73 0.64
 3 11 -17 0.75 0.47
 -3 11 -17 0.48 0.4
 -3 -11 17 0.23 0.55
 -3 11 -18 0.55 0.34
 3 11 -18 0.44 0.49
 -3 -11 18 1.19 0.59
 3 11 -19 0.58 0.33
 -3 -11 19 2.17 0.59
 -3 -13 0 0.46 0.54
 -3 13 0 0.67 0.49
 -3 13 1 13.9 1.2
 -3 -13 -1 14.45 1.61
 -3 -13 -2 -0.2 0.56
 -3 13 2 -0.28 0.5
 -3 13 3 0.88 0.46
 -3 -13 -3 0.6 0.73
 -3 13 4 0.95 0.6
 -3 -13 -4 1.14 0.92
 -3 13 5 3.92 0.9
 -3 -13 -5 5.14 1.28
 3 -13 -5 4.74 1.15
 3 -13 -6 2.23 0.91
 -3 13 6 1.93 0.83
 -3 -13 -6 3.12 1.08
 -3 -13 7 -0.05 0.33
 -3 -13 -7 0.52 0.75
 -3 13 7 0.56 0.84
 3 -13 -7 0.1 0.7
 -3 13 7 -0.21 0.39
 -3 13 8 0.12 0.33
 3 -13 -8 0.04 0.72
 3 -13 8 -0.33 0.43
 -3 13 8 0.8 0.52
 -3 -13 8 0.07 0.36
 -3 -13 -8 0.54 0.67
 -3 -13 9 0 0.44
 -3 13 9 -0.16 0.41
 3 -13 -9 0.76 0.74
 -3 -13 -9 0.6 0.77
 3 -13 9 -0.13 0.5
 -3 -13 10 0.07 0.44
 -3 13 10 0.08 0.44
 -3 13 10 -0.52 0.53
 3 -13 10 -0.74 0.69
 -3 -13 -10 -0.62 0.8
 -3 -13 -11 0.36 0.68
 -3 13 11 -0.29 0.48
 3 -13 11 -0.23 0.57
 -3 13 11 0.47 0.42
 -3 -13 11 0.29 0.53
 -3 -13 12 -0.18 0.52
 -3 13 -12 0.2 0.48
 -3 -13 -12 0.88 0.66
 -3 13 12 0.13 0.45
 -3 13 12 -0.07 0.46
 3 -13 12 -0.33 0.71
 -3 13 13 2.31 0.64
 -3 -13 13 2.54 0.83
 -3 13 -13 3.44 0.78
 -3 13 13 3.53 0.75
 3 -13 13 2.65 0.79
 -3 13 -14 1.08 0.57
 3 -13 14 0.94 0.74
 -3 13 14 1.21 0.6
 3 -13 15 2.45 0.82
 -3 -13 15 0.48 0.68
 -3 13 -15 1.47 0.61
 -3 13 15 3.39 0.8
 -3 13 -16 0.15 0.47
 3 -13 16 0.96 0.68
 -3 -13 16 -0.35 0.72
 3 13 -17 0.22 0.47
 -3 13 -17 1.6 0.54
 -3 -13 17 0.33 0.51
 -3 13 -18 -0.38 0.41
 -3 -13 18 0.3 0.52
 3 13 -18 0.22 0.39
 -3 15 0 23.66 1.59
 -3 -15 0 25.17 2.15
 -3 -15 -1 0.86 0.68
 -3 15 1 0.5 0.41
 -3 -15 -2 0.02 0.69
 -3 15 2 0.33 0.42
 -3 -15 -3 4.5 1.24
 -3 15 3 4.89 0.84
 -3 -15 -4 6.67 1.49
 -3 15 4 7.13 1.16
 3 -15 -5 51.92 3.45
 -3 -15 -5 53.98 3.68
 -3 15 5 51.07 2.87
 3 -15 -6 8.23 1.56
 -3 15 6 8.27 0.75
 -3 -15 -6 8.34 1.58
 -3 15 6 7.91 1.33
 -3 15 7 1.76 0.41
 -3 -15 7 1.59 0.49
 3 -15 -7 0.81 0.73
 -3 -15 -7 2.15 1.08
 -3 15 7 1.25 0.84
 -3 -15 -8 6.51 1.54
 -3 -15 8 5.6 0.74
 -3 15 8 6 0.81
 3 -15 -8 6.04 1.44
 3 -15 8 4.23 0.7
 -3 15 8 6.42 0.71
 3 -15 9 14.22 1.2
 -3 15 9 16.25 1.19
 -3 -15 9 15.96 1.27
 -3 -15 -9 17.63 2.38
 3 -15 -9 15.74 2.27
 -3 15 10 5.73 0.81
 -3 -15 10 5.18 0.89
 3 -15 10 5.32 0.87
 -3 -15 -10 6.51 1.59
 -3 15 -11 2.29 0.64
 -3 -15 -11 1.04 0.68
 -3 15 11 1.9 0.59
 -3 -15 11 2.3 0.67
 3 -15 11 2.12 0.68
 -3 15 12 4.41 0.72
 -3 15 -12 6.36 0.89
 3 -15 12 4.22 0.87
 -3 -15 -12 3.52 1.27
 -3 -15 12 5.96 1.02
 -3 15 -13 2.72 0.76
 -3 -15 13 3.86 0.96
 3 -15 13 2.73 0.78
 -3 15 13 2.42 0.63
 -3 15 -14 0.43 0.5
 3 -15 14 1.62 0.76
 -3 -15 15 0.97 0.62
 3 -15 15 3.21 0.86
 -3 15 -15 1.93 0.64
 3 -15 16 2.44 0.83
 -3 15 -16 1.22 0.53
 -3 -15 16 0.98 0.63
 -3 -15 17 2.05 0.62
 -3 15 -17 3.91 0.68
 3 15 -17 3.22 0.68
 -3 -15 18 2.77 0.7
 3 15 -18 1.52 0.47
 -3 15 -18 1.52 0.43
 -3 -17 0 3.25 0.98
 -3 17 0 3.14 0.68
 -3 17 1 10.53 1.16
 -3 17 -1 10.98 1.24
 -3 -17 -1 13.2 1.77
 -3 -17 -2 -0.33 0.61
 -3 17 2 0.31 0.38
 -3 17 3 3.26 0.78
 -3 -17 -3 3.06 1.1
 -3 -17 -4 79.08 4.53
 -3 17 4 72.29 3.37
 3 -17 -5 41.51 3.34
 -3 -17 -5 44.76 3.52
 -3 17 5 40.62 2.71
 -3 17 5 38.48 1.51
 3 -17 -6 7.36 1.57
 -3 17 6 7.4 0.73
 -3 -17 -6 7.9 1.56
 -3 17 6 7.38 1.35
 3 17 7 25.03 1.31
 -3 17 7 32.78 2.78
 -3 -17 -7 32.26 3.1
 -3 -17 7 28.56 1.54
 3 -17 -7 34.15 3.27
 -3 17 7 29.98 1.47
 -3 17 7 25.72 1.39
 3 -17 -8 21.72 2.72
 -3 17 8 21.32 1.32
 -3 -17 8 20.86 1.44
 -3 17 8 17.7 1.25
 -3 -17 -8 23.68 2.8
 3 17 8 17.56 1.16
 -3 -17 9 14.52 1.22
 -3 -17 -9 12.32 2
 -3 17 9 13.25 1.11
 3 -17 9 11.14 1.09
 3 -17 -9 12.71 2.16
 -3 -17 10 8.11 1.03
 -3 -17 -10 8.27 1.82
 -3 17 10 8.2 0.99
 3 -17 10 7.89 1.01
 -3 17 -10 9.28 1
 -3 -17 -11 7.98 1.83
 -3 17 -11 11.66 1.13
 -3 17 11 10.43 1.08
 3 -17 11 10.28 1.16
 -3 -17 11 10.42 1.18
 -3 -17 -12 1.56 1.04
 -3 17 -12 2.71 0.72
 -3 17 12 1.03 0.5
 3 -17 12 1.42 0.72
 -3 -17 12 1.88 0.72
 3 -17 13 4.31 0.95
 -3 -17 13 5.83 1.08
 -3 17 -13 4.13 0.81
 -3 17 13 4.63 0.82
 3 -17 14 3.03 0.94
 -3 17 -14 1.83 0.61
 -3 17 -15 -0.06 0.56
 -3 -17 15 0.8 0.64
 3 -17 15 0.99 0.67
 -3 -17 16 2.27 0.7
 3 17 -16 2.55 0.69
 -3 17 -16 2.21 0.62
 3 17 -17 7.45 0.9
 -3 17 -17 6.15 0.79
 -3 -17 17 6 0.91
 -3 -17 18 5.78 0.81
 3 17 -18 5.99 0.74
 -3 17 -18 6.44 0.77
 -3 -19 0 1.52 0.8
 -3 19 0 0.64 0.41
 -3 19 -1 0.15 0.36
 -3 19 1 0.2 0.4
 -3 -19 -1 0.37 0.67
 -3 19 2 7.69 1.07
 -3 -19 -2 8.01 1.54
 -3 -19 -3 27.29 2.76
 -3 19 3 26.47 2.04
 -3 19 3 24.83 1.21
 -3 19 4 7.64 1.2
 -3 19 4 5.95 0.66
 -3 -19 -4 6.23 1.46
 -3 19 -5 7.53 0.74
 3 -19 -5 7.18 1.6
 -3 19 5 6.92 1.23
 -3 19 5 7.88 0.75
 -3 -19 -5 8.19 1.71
 3 -19 -6 21.34 2.68
 -3 19 6 24.5 2.37
 -3 19 6 19.32 1.21
 -3 19 6 22.51 1.25
 -3 -19 -6 24.94 2.87
 -3 19 -6 21.96 1.25
 3 19 6 21.37 1.25
 3 19 7 7.36 0.8
 -3 19 7 7.07 0.81
 -3 19 7 7.92 1.51
 -3 -19 7 6.28 0.79
 -3 -19 -7 7.37 1.74
 3 -19 -7 6.24 1.56
 -3 19 7 6.93 0.76
 -3 19 -7 8.24 0.87
 3 19 8 14.01 1.09
 -3 19 8 15.28 1.13
 -3 19 -8 16.49 1.22
 -3 19 8 12.89 1.1
 3 -19 -8 14.05 2.29
 -3 -19 -8 14.95 2.43
 -3 -19 8 14.77 1.23
 -3 -19 -9 12.41 2.21
 -3 19 9 12.32 1.12
 3 19 9 11.19 1.03
 3 -19 -9 11.92 2.21
 -3 -19 9 12.78 1.21
 -3 19 -9 14.26 1.17
 -3 -19 -10 4.51 1.46
 -3 19 -10 4.75 0.78
 -3 -19 10 4.96 0.9
 -3 19 10 4.33 0.77
 3 -19 11 3 0.73
 -3 19 -11 4.18 0.79
 -3 -19 11 4.76 0.95
 -3 -19 -11 2.11 1.16
 -3 19 11 3.78 0.8
 -3 -19 -12 1.89 1.05
 -3 19 12 4.43 0.82
 -3 19 -12 5.42 0.88
 -3 -19 12 4.69 0.96
 3 -19 12 3.95 0.89
 -3 19 -13 1.37 0.57
 -3 -19 13 0.19 0.66
 3 -19 13 1.4 0.72
 -3 19 13 0.4 0.45
 -3 19 -14 -0.13 0.52
 3 -19 14 1.35 0.71
 -3 -19 14 -0.4 0.65
 -3 -19 15 0.36 0.54
 -3 19 -15 0.15 0.52
 -3 19 -16 1.72 0.52
 3 19 -16 1.87 0.55
 -3 -19 16 1.41 0.59
 3 19 -17 2.48 0.58
 -3 19 -17 2.24 0.56
 -3 -19 17 2.76 0.67
 3 19 -18 4.55 0.64
 -3 19 -18 5.45 0.71
 -3 -21 0 -0.07 0.77
 -3 21 0 0.02 0.45
 -3 21 -1 0.76 0.45
 -3 -21 -1 0.8 0.73
 -3 21 1 0.72 0.46
 -3 -21 1 0.28 0.6
 -3 21 2 0.88 0.5
 -3 -21 -2 1.34 1.01
 -3 21 -2 0.57 0.54
 -3 21 3 5.26 0.59
 -3 -21 -3 6.32 1.57
 -3 21 3 5.22 1.02
 -3 21 3 4.99 0.62
 3 -21 -4 1.39 0.9
 -3 21 4 1.22 0.38
 -3 21 4 1.29 0.43
 -3 -21 -4 0.89 0.77
 -3 21 4 1.36 0.68
 -3 21 -5 0.32 0.32
 3 -21 -5 0.23 0.67
 -3 -21 -5 1.19 0.93
 -3 21 5 0.71 0.66
 -3 21 5 0.37 0.37
 -3 21 5 -0.23 0.43
 -3 21 -6 0.41 0.41
 -3 21 6 0.08 0.74
 -3 -21 -6 0.03 0.72
 3 21 6 -0.3 0.4
 3 -21 -6 -0.05 0.67
 -3 21 6 -0.01 0.38
 -3 21 6 -0.33 0.43
 -3 -21 -7 2.37 1.17
 -3 21 7 1.94 0.51
 -3 21 -7 2.22 0.57
 3 -21 -7 2.39 1.21
 3 21 7 2.18 0.54
 -3 21 7 1.89 0.5
 -3 21 -8 0.06 0.46
 3 -21 -8 -0.93 0.98
 -3 -21 8 -0.27 0.47
 -3 21 8 -0.73 0.56
 -3 -21 -8 -0.1 0.83
 3 21 8 0.13 0.45
 -3 21 8 0.04 0.39
 -3 21 9 0.54 0.45
 -3 -21 9 0.44 0.47
 3 21 9 0.77 0.43
 -3 21 -9 1.21 0.6
 3 -21 -9 0.35 0.88
 -3 -21 -9 1.99 1.16
 -3 21 10 1.96 0.59
 -3 -21 -10 1.96 1.02
 -3 21 -10 2.7 0.65
 -3 -21 10 3.27 0.76
 -3 -21 11 -0.08 0.55
 -3 21 11 0.07 0.56
 -3 21 -11 -0.19 0.45
 -3 21 -12 -0.03 0.47
 -3 21 12 0.54 0.57
 -3 -21 12 1.11 0.63
 -3 21 13 -0.52 0.51
 -3 21 -13 0.8 0.6
 -3 -21 13 -0.7 0.71
 -3 21 14 0.18 0.46
 -3 21 -14 0.24 0.45
 -3 -21 14 -0.2 0.61
 -3 -21 15 0.5 0.52
 -3 21 -15 -0.06 0.51
 3 21 -15 0.37 0.56
 3 21 -16 0.08 0.43
 -3 21 -16 -0.57 0.47
 -3 -21 16 -0.11 0.45
 3 21 -17 0.19 0.4
 -3 21 -17 -0.31 0.4
 -3 -21 17 0.23 0.38
 -3 -23 0 2.13 1.08
 -3 23 0 1.89 0.65
 -3 -23 -1 -0.07 0.82
 -3 23 1 0.2 0.33
 -3 -23 1 -0.07 0.86
 -3 23 1 -0.04 0.49
 -3 23 -1 0.16 0.42
 -3 -23 -2 15.62 2.34
 -3 23 -2 12.59 1.46
 -3 -23 2 13.89 2.03
 -3 23 2 13.75 1.55
 -3 23 2 12.89 1
 -3 23 3 4.43 0.67
 -3 23 3 4.3 0.98
 -3 23 -3 4.65 0.96
 -3 -23 -3 4.81 1.58
 -3 23 3 3.93 0.56
 -3 23 4 1.74 0.63
 3 -23 -4 1.12 0.78
 -3 23 4 2.52 0.54
 -3 -23 -4 1.52 0.93
 -3 23 4 1.05 0.41
 -3 23 -5 4.69 0.65
 -3 23 5 4.49 0.68
 -3 23 5 5.48 0.74
 -3 -23 -5 5.43 1.62
 -3 23 5 5.91 1.26
 3 -23 -5 5.71 1.54
 -3 23 -6 22.89 1.33
 -3 23 6 23.75 1.38
 -3 23 6 21.23 1.35
 -3 -23 -6 24.74 3.04
 -3 23 6 24.2 2.5
 3 23 6 23.85 1.45
 3 -23 -6 23.92 3.13
 -3 23 7 5.02 0.73
 -3 23 -7 5.68 0.78
 -3 -23 -7 5.17 1.56
 -3 23 7 4.67 0.72
 3 23 7 5.48 0.83
 3 -23 -7 3.86 1.36
 3 -23 -8 1.78 1.15
 -3 23 8 2.12 0.49
 3 23 8 2.59 0.65
 -3 23 -8 2.41 0.57
 -3 -23 -8 1.2 1
 -3 23 9 1.4 0.57
 -3 23 -9 1.74 0.56
 3 -23 -9 1.12 0.91
 3 23 9 2.07 0.58
 -3 -23 -9 2.27 1.27
 -3 23 -10 0.82 0.45
 3 23 10 1.53 0.52
 -3 23 10 0.95 0.54
 -3 -23 -10 1.17 0.88
 -3 -23 -11 0.52 0.84
 -3 -23 11 -0.81 0.64
 -3 23 -11 0.33 0.45
 -3 23 11 0.23 0.52
 -3 23 -12 6.4 0.88
 -3 23 12 6.3 0.94
 -3 -23 12 4.82 1
 -3 23 13 2.22 0.6
 -3 23 -13 3.58 0.74
 -3 -23 13 2.11 0.67
 -3 23 -14 0.29 0.44
 -3 -23 14 0.2 0.57
 -3 23 14 0.71 0.46
 -3 -23 15 1.39 0.59
 -3 23 -15 1.76 0.55
 3 23 -15 1.94 0.62
 -3 23 -16 2.21 0.57
 3 23 -16 1.98 0.55
 3 23 -17 0.52 0.38
 -3 23 -17 0.43 0.35
 -3 -25 0 3.99 1.28
 -3 -25 1 5.26 1.33
 -3 -25 -1 6.7 1.69
 -3 25 1 6.32 0.73
 -3 25 1 4.12 0.91
 -3 -25 2 20.89 2.73
 -3 25 2 18.34 1.83
 -3 25 2 17.77 1.19
 -3 25 2 19.46 1.22
 -3 -25 -2 20.63 2.79
 -3 -25 -3 16.36 2.66
 -3 25 3 14.66 1.13
 -3 25 3 14.26 1.1
 -3 -25 3 14.8 2.27
 -3 25 3 12.96 1.6
 -3 -25 -4 40.63 3.99
 -3 25 4 38.14 1.78
 -3 25 4 38.35 2.87
 -3 25 4 38.35 1.77
 3 -25 -4 41.75 3.99
 -3 25 5 3.62 0.64
 -3 25 5 4.55 1.18
 -3 -25 -5 3.63 1.47
 3 -25 -5 4.27 1.39
 -3 25 5 4.04 0.69
 -3 25 6 24.36 1.48
 -3 25 6 24.46 2.62
 -3 25 -6 25.18 1.36
 -3 -25 -6 24.97 3.26
 -3 25 6 22.74 1.46
 3 25 6 26.99 1.61
 3 -25 -6 25.61 3.46
 3 25 7 6.67 0.89
 -3 25 7 6.25 0.85
 -3 25 -7 7.52 0.85
 3 -25 -7 3.73 1.58
 -3 -25 -7 4.62 1.67
 -3 25 8 22.5 1.53
 3 -25 -8 18.05 3.01
 -3 25 -8 25.93 1.5
 3 25 8 25.64 1.63
 -3 -25 -8 22.82 3.16
 3 -25 -9 -0.02 0.86
 -3 25 -9 0.12 0.43
 3 25 9 0.65 0.56
 -3 -25 -9 -0.24 0.99
 -3 25 9 0.01 0.5
 -3 -25 -10 4.29 1.49
 -3 25 -10 5.84 0.82
 3 25 10 5.08 0.83
 -3 25 10 8.01 1.04
 -3 25 11 11.15 1.21
 -3 25 -11 9.52 1.04
 -3 25 -12 4.26 0.72
 -3 25 12 4.18 0.83
 -3 25 -13 3.87 0.72
 -3 25 13 2.93 0.62
 3 25 -14 21.21 1.52
 -3 25 -14 18.91 1.36
 3 25 -15 2.08 0.61
 -3 25 -15 2.6 0.57
 -3 25 -16 5.24 0.72
 3 25 -16 6.19 0.77
 -3 -27 0 17.52 2.77
 -3 27 0 18.52 1.23
 -3 27 1 2.03 0.54
 -3 -27 1 1.87 1.22
 -3 -27 -1 1.28 1.06
 -3 -27 2 24.8 3.14
 -3 -27 -2 23.02 3.14
 -3 27 2 24.34 1.47
 -3 27 2 24.48 1.42
 -3 -27 -3 8.34 2.08
 3 -27 -3 7.74 1.97
 -3 27 3 7.26 0.9
 -3 27 3 8.43 0.92
 -3 -27 3 8.09 1.95
 -3 -27 -4 34.44 3.85
 -3 27 4 34.63 1.78
 -3 27 4 34.41 1.72
 -3 -27 4 36.99 3.88
 3 -27 -4 34.7 3.89
 3 -27 -5 3.11 1.4
 -3 27 5 4.17 0.74
 -3 -27 -5 1.91 1.32
 -3 27 5 3.29 0.63
 3 27 6 11.23 1.17
 3 -27 -6 8.84 2.19
 -3 -27 -6 9.19 2.11
 -3 27 6 10.81 1.05
 -3 27 -7 7.31 0.83
 -3 27 7 6.83 0.96
 3 -27 -7 7.04 1.99
 3 27 7 8.33 1
 -3 -27 -7 7.44 2
 -3 -27 -8 4.78 1.59
 -3 27 8 6.26 0.81
 3 27 8 6.1 0.94
 -3 27 -8 6.06 0.81
 3 -27 -8 4.32 1.67
 3 27 9 0.17 0.55
 -3 27 -9 0.31 0.45
 -3 27 9 -0.48 0.6
 -3 -27 -9 0.06 0.8
 3 -27 -9 0.34 1.09
 -3 27 -10 10.19 1.02
 3 27 10 9.95 1.12
 -3 27 10 10.61 1.19
 -3 27 -11 4.34 0.76
 -3 27 11 4.07 0.83
 -3 27 -12 12.45 1.11
 -3 27 12 11.61 1.2
 3 27 -12 13.02 1.19
 -3 27 13 1.71 0.55
 -3 27 -13 1.32 0.49
 3 27 -13 2.1 0.65
 3 27 -14 20.48 1.42
 -3 27 -14 17.71 1.27
 -3 27 -15 1.7 0.49
 3 27 -15 1.8 0.56
 3 27 -16 1.96 0.5
 -3 27 -16 2.41 0.53
 -3 -29 0 -0.54 1.05
 -3 29 0 0.3 0.36
 -3 -29 -1 1.01 1
 -3 -29 1 2.09 1.63
 -3 29 1 0.81 0.51
 -3 -29 2 6.28 1.82
 -3 29 2 7.41 0.86
 -3 29 2 6.42 0.9
 -3 -29 -2 7.1 2.04
 3 -29 -3 0.11 1.27
 -3 -29 3 2.71 1.2
 -3 29 3 1.69 0.62
 -3 29 3 1.64 0.56
 -3 -29 -3 0.6 1.05
 3 -29 -4 3.82 1.62
 -3 -29 4 3.5 1.54
 -3 29 4 3.55 0.72
 -3 29 4 3.4 0.63
 -3 -29 -4 3.29 1.25
 -3 29 5 -0.27 0.42
 3 -29 -5 1.02 1.15
 3 29 5 0.94 0.59
 -3 29 5 0.15 0.52
 -3 -29 -5 0.47 1.18
 3 29 6 16.3 1.4
 3 -29 -6 13.06 2.73
 -3 29 6 14.71 1.33
 -3 -29 -6 13.04 2.67
 3 29 7 0.77 0.49
 -3 29 7 0.84 0.55
 3 -29 -7 1.28 1.07
 -3 -29 -7 0.36 0.89
 -3 -29 -8 2.04 1.07
 -3 29 -8 3.01 0.63
 3 29 8 3.15 0.73
 3 -29 -8 2.33 1.26
 -3 29 8 0.14 0.8
 -3 29 9 0.18 0.61
 -3 29 -9 -0.05 0.43
 3 29 9 -0.38 0.5
 3 29 10 1 0.51
 -3 29 10 0.87 0.55
 -3 29 -10 1.1 0.43
 -3 29 11 -0.02 0.6
 3 29 -11 -0.03 0.42
 -3 29 -11 -0.31 0.39
 -3 29 -12 7.14 0.88
 3 29 -12 6.61 0.88
 -3 29 12 6.62 0.97
 3 29 -13 2.35 0.6
 -3 29 -13 1.76 0.48
 -3 29 13 1.45 0.53
 3 29 -14 1.25 0.45
 -3 29 -14 1.07 0.45
 3 29 -15 0.26 0.35
 -3 29 -15 0.65 0.43
 -3 -31 0 10.76 2.6
 -3 31 0 11.01 1.04
 -3 -31 1 1.07 1.25
 -3 31 -1 1.62 0.59
 -3 31 1 1.2 0.5
 -3 -31 -1 1.08 1.15
 -3 31 1 1.88 0.72
 -3 -31 -2 -0.54 1.37
 3 -31 -2 -0.27 1.22
 -3 -31 2 -0.45 1.03
 -3 31 2 0.51 0.55
 -3 31 2 -0.06 0.51
 -3 -31 3 0.92 0.97
 -3 -31 -3 1.68 1.17
 -3 31 3 1.17 0.47
 3 -31 -3 1.29 1.37
 -3 31 3 1.65 0.59
 -3 31 4 -0.07 0.59
 -3 31 4 -0.5 0.53
 -3 -31 4 -0.44 1.38
 3 -31 -4 -0.11 1.06
 -3 -31 -4 0.08 0.91
 3 -31 -5 1.23 1.17
 -3 -31 -5 2.13 1.47
 -3 31 5 0.98 0.54
 3 31 5 1.75 0.75
 -3 31 6 7.71 1.01
 3 31 6 8.22 1.06
 3 -31 -6 5.34 1.88
 -3 -31 -6 7.69 2.16
 3 -31 -7 2.23 1.37
 -3 31 7 3.3 0.69
 3 31 7 3.85 0.96
 -3 -31 -7 3.54 1.58
 -3 31 8 3.32 0.66
 3 31 8 4.87 0.85
 3 31 9 0.27 0.45
 -3 31 -9 0.1 0.4
 -3 31 9 -0.63 0.65
 3 31 -10 4 0.68
 -3 31 10 4.21 0.85
 3 31 10 5.26 0.86
 -3 31 -10 3.56 0.62
 -3 31 -11 0.31 0.4
 -3 31 11 -0.53 0.59
 3 31 -11 0.07 0.37
 -3 31 12 -0.4 0.52
 -3 31 -12 -0.31 0.47
 3 31 -12 0.37 0.42
 -3 31 13 -0.67 0.5
 -3 31 -13 -0.47 0.41
 3 31 -13 -0.06 0.38
 -3 31 -14 0.29 0.37
 3 31 -14 0.07 0.33
 -3 33 0 40.71 1.99
 -3 33 0 46.24 2.22
 -3 -33 0 40.26 4.96
 -3 33 1 0.28 0.44
 -3 33 1 1.48 0.78
 -3 -33 -1 0.39 1.13
 -3 -33 1 0.79 1.15
 3 -33 -1 -0.52 1.08
 -3 33 -1 2.64 0.72
 -3 33 2 60.9 2.42
 -3 -33 2 55.96 5.72
 -3 33 2 66 2.62
 3 -33 -2 61.13 6.16
 -3 -33 -2 59.1 5.91
 -3 33 3 1.72 0.66
 -3 -33 3 1.49 1.22
 3 -33 -3 1.18 1.26
 -3 33 3 1.39 0.51
 -3 -33 -3 1.45 1.23
 3 -33 -4 1.25 1.19
 -3 33 4 -0.03 0.55
 -3 -33 -4 0.49 0.95
 3 33 4 2.46 0.81
 -3 33 5 2.69 0.71
 -3 -33 -5 1.47 0.96
 3 -33 -5 0.82 0.86
 -3 33 6 11.67 1.21
 3 33 6 15.07 1.39
 3 33 7 0.09 0.62
 -3 33 7 -0.16 0.67
 -3 33 8 22.99 1.61
 3 33 8 21.28 1.55
 -3 33 9 0.56 0.52
 3 33 9 0.76 0.54
 -3 33 10 16.97 1.44
 3 33 10 15.85 1.35
 -3 33 11 0.54 0.54
 -3 33 12 5.45 0.82
 -3 33 -12 5.92 0.74
 3 33 -13 0.21 0.28
 -3 33 13 -0.1 0.39
 -3 33 -13 0.48 0.35
 -3 35 0 50.53 2.24
 -3 -35 0 46.12 5.44
 -3 35 0 52.8 2.56
 3 -35 0 56.2 6.3
 -3 35 1 1.77 0.62
 -3 35 -1 3.47 0.81
 3 -35 -1 0.85 1.15
 -3 -35 -1 2.4 1.59
 -3 -35 1 -0.18 1.09
 -3 35 -1 3.21 1
 -3 35 1 4.23 1
 3 -35 1 4 2.07
 -3 35 -2 19.53 1.47
 -3 -35 2 11.86 3
 -3 35 2 16.67 1.31
 -3 35 -2 21.92 1.6
 -3 35 2 19.85 1.56
 3 -35 -2 19.38 3.69
 -3 -35 -2 12.93 2.89
 -3 35 3 -0.33 0.51
 -3 35 3 -0.55 0.62
 3 35 4 17.36 1.55
 -3 35 4 15.7 1.4
 3 35 5 1.37 0.79
 -3 35 5 -0.28 0.65
 -3 35 6 1.15 0.56
 3 35 6 1.48 0.62
 -3 35 7 -0.52 0.75
 3 35 7 -0.46 0.66
 -3 35 8 19.59 1.56
 3 35 8 19 1.46
 3 35 9 0.53 0.54
 -3 35 9 1.1 0.6
 3 35 10 20.19 1.49
 -3 35 10 22.71 1.65
 -3 35 11 0.34 0.47
 -3 35 12 8.19 0.92
 -3 35 13 1.79 0.44
 -3 37 0 70.56 2.67
 -3 37 0 78.99 2.99
 -3 37 1 -0.32 0.53
 -3 37 -1 0.74 0.68
 -3 37 1 0.75 0.63
 -3 37 -1 1.24 0.57
 -3 37 -2 -0.15 0.47
 -3 37 2 -0.87 0.64
 -3 37 -2 0.13 0.8
 -3 37 2 -0.59 0.64
 -3 37 3 0.13 0.59
 -3 37 -3 1.17 0.67
 3 37 3 2.25 0.83
 -3 37 -3 0.73 0.55
 -3 37 -4 4.92 0.85
 -3 37 -4 5.58 0.89
 -3 37 4 4.92 0.84
 3 37 4 6.18 1.02
 -3 37 5 0.06 0.58
 3 37 5 0.43 0.62
 3 37 6 0.07 0.51
 -3 37 6 -0.37 0.75
 3 37 7 -0.22 0.65
 -3 37 7 -0.26 0.63
 3 37 8 7.05 0.95
 -3 37 8 7.52 1.02
 3 37 9 0.4 0.53
 -3 37 9 0.5 0.58
 -3 37 10 7.73 0.96
 3 37 10 5.88 0.82
 -3 37 11 0.07 0.43
 -3 37 12 2.66 0.52
 -3 39 0 1.11 0.63
 -3 39 0 0.65 0.48
 -3 39 -1 -0.01 0.42
 -3 39 -1 -0.13 0.52
 -3 39 1 -0.59 0.48
 -3 39 1 0.13 0.56
 -3 39 -2 0.6 0.47
 -3 39 2 0.05 0.59
 3 39 2 1.63 0.73
 -3 39 -2 0.15 0.48
 -3 39 -3 -0.95 0.52
 -3 39 -3 0.26 0.48
 -3 39 3 -0.71 0.64
 -3 39 4 0.52 0.53
 -3 39 -4 2.08 0.65
 -3 39 -4 1.13 0.53
 3 39 4 2.24 0.8
 -3 39 5 -0.72 0.63
 -3 39 -5 1.13 0.54
 3 39 5 0.78 0.6
 -3 39 6 5.82 0.88
 3 39 6 4.98 0.85
 -3 39 -6 6.33 0.92
 3 39 7 -0.58 0.6
 -3 39 7 0.06 0.5
 -3 39 8 1.76 0.59
 3 39 8 0.09 0.59
 -3 39 9 0.55 0.62
 3 39 9 -0.3 0.44
 3 39 10 0.29 0.33
 -3 39 10 0.67 0.52
 -3 39 11 -0.47 0.42
 -3 41 0 17.47 1.33
 -3 41 0 18.39 1.48
 3 41 1 1.61 0.84
 -3 41 -1 -0.04 0.45
 -3 41 -1 0.74 0.55
 -3 41 1 0.15 0.51
 -3 41 -2 3.23 0.72
 -3 41 2 4.35 0.85
 -3 41 -2 3.36 0.63
 3 41 2 4.65 0.89
 3 41 3 0 0.55
 -3 41 -3 0.26 0.5
 -3 41 -3 0.52 0.39
 -3 41 -4 10.25 1.05
 -3 41 4 8.48 1.02
 3 41 4 10.62 1.18
 -3 41 5 -0.52 0.6
 -3 41 -5 0.91 0.48
 3 41 5 0.84 0.59
 -3 41 -6 4.33 0.74
 -3 41 6 3.45 0.75
 3 41 6 2.66 0.65
 3 41 7 0.18 0.47
 -3 41 7 1.14 0.52
 -3 41 -7 0.99 0.49
 -3 41 8 3.56 0.69
 3 41 8 3.73 0.71
 -3 41 -8 4.89 0.74
 -3 41 -9 0.03 0.37
 -3 41 9 -0.09 0.4
 3 41 9 -0.16 0.41
 -3 41 -10 1.82 0.46
 -3 41 10 1.6 0.47
 -3 43 0 5.24 0.84
 3 43 0 6.71 1.04
 -3 43 -1 0.57 0.42
 3 43 -1 2.24 0.78
 -3 43 1 0.34 0.5
 3 43 1 1.19 0.6
 -3 43 -1 0.73 0.46
 3 43 2 11.07 1.15
 -3 43 2 11.46 1.17
 -3 43 -2 9.37 0.95
 -3 43 -2 9.58 1.03
 -3 43 -3 0.47 0.44
 -3 43 -3 0.25 0.42
 -3 43 3 0.96 0.47
 3 43 3 -0.02 0.55
 3 43 4 15.77 1.32
 -3 43 -4 15.35 1.17
 -3 43 4 16.01 1.32
 -3 43 -5 2.17 0.56
 3 43 5 2.17 0.64
 -3 43 5 2.82 0.68
 3 43 6 14.58 1.28
 -3 43 -6 12.71 1.06
 -3 43 6 12.61 1.17
 3 43 7 0.84 0.5
 -3 43 -7 1.01 0.45
 -3 43 7 0.41 0.43
 -3 43 8 10.55 0.96
 3 43 8 8.1 0.89
 -3 43 -8 8.17 0.81
 -3 43 9 0.32 0.37
 -3 45 0 1.26 0.53
 3 45 0 1.24 0.6
 3 45 -1 0.89 0.55
 -3 45 -1 -0.65 0.53
 3 45 1 0.17 0.5
 -3 45 1 -0.2 0.47
 3 45 -2 3.4 0.75
 3 45 2 2.8 0.64
 -3 45 -2 2.64 0.57
 -3 45 2 2.74 0.57
 -3 45 -3 0.59 0.32
 -3 45 3 0.51 0.46
 3 45 3 -0.24 0.57
 3 45 -3 1.58 0.57
 3 45 -4 6.45 0.84
 3 45 4 5.18 0.77
 -3 45 4 6.63 0.9
 -3 45 -4 5.31 0.7
 -3 45 5 1.68 0.54
 -3 45 -5 1.06 0.41
 3 45 5 0.83 0.46
 3 45 -5 1.74 0.56
 3 45 6 7.88 0.89
 -3 45 6 6.65 0.81
 -3 45 -6 6.76 0.72
 -3 45 7 0.24 0.35
 3 45 7 1 0.43
 -3 47 0 0.97 0.4
 3 47 0 1.44 0.54
 -3 47 1 -0.01 0.38
 -3 47 -1 0.4 0.32
 3 47 1 -0.23 0.46
 3 47 -1 0.06 0.42
 3 47 2 -1 0.5
 -3 47 2 0.44 0.39
 3 47 -2 -0.45 0.39
 3 47 -3 -0.5 0.4
 -3 47 3 -0.07 0.36
 3 47 3 -0.65 0.48
 3 47 4 -0.29 0.43
 -3 47 4 0.56 0.4
 -3 47 5 0.38 0.35
 -4 0 0 4.33 0.49
 -4 0 1 -0.09 0.25
 -4 0 -1 -0.15 0.28
 -4 0 -2 540.53 6.1
 -4 0 2 546.17 5.74
 -4 0 -3 0.36 0.46
 -4 0 3 -0.04 0.41
 -4 0 4 5.05 0.84
 -4 0 -4 4.32 0.78
 -4 0 -5 0 0.46
 4 0 -5 0.03 0.07
 -4 0 5 0.24 0.52
 4 0 -6 0.72 0.17
 -4 0 -6 1.95 0.76
 -4 0 -7 0.17 0.6
 -4 0 -8 2.01 0.8
 -4 0 9 -0.25 0.42
 -4 0 -9 0.32 0.34
 4 0 9 -0.15 0.39
 -4 0 -9 0.65 0.68
 -4 0 -10 17.3 1.08
 4 0 10 20.99 1.34
 -4 0 10 17.75 1.2
 -4 0 -10 19.44 2.21
 -4 0 -11 0.37 0.41
 4 0 11 0.33 0.52
 -4 0 -11 -0.13 0.63
 -4 0 11 0.09 0.4
 4 0 12 28.31 1.75
 -4 0 12 27.11 1.69
 -4 0 -12 27.55 1.48
 -4 0 13 0.06 0.69
 -4 0 -13 0.45 0.4
 4 0 13 1.18 0.78
 4 0 14 22.99 1.76
 -4 0 14 20.01 1.5
 -4 0 -14 22.78 1.39
 -4 0 -15 0.77 0.43
 -4 0 15 -0.2 0.69
 -4 0 16 12.44 1.26
 -4 0 -16 17.63 1.22
 -4 0 17 0.05 0.55
 -4 0 18 2.42 0.66
 -4 0 19 3.33 0.65
 -4 -2 0 65.81 1.77
 -4 2 -1 -0.21 0.29
 -4 -2 -1 0.02 0.26
 -4 -2 1 -0.06 0.14
 -4 -2 1 -0.01 0.21
 -4 2 -2 1.92 0.44
 -4 -2 -2 2.11 0.51
 -4 -2 2 2.13 0.46
 -4 2 -3 12.82 1.12
 -4 -2 -3 11.46 1.14
 -4 -2 3 12.06 1.03
 -4 2 4 178.74 4.36
 -4 -2 -4 182.62 4.52
 -4 2 -4 181.65 4.27
 4 -2 -4 178.99 3.12
 -4 -2 4 183.82 4.29
 4 -2 -5 0.36 0.27
 -4 -2 -5 0.19 0.47
 -4 2 -5 0.19 0.49
 -4 -2 5 0.8 0.65
 -4 2 5 0.26 0.54
 -4 -2 -6 49.82 2.73
 -4 2 6 51.6 2.98
 -4 2 -6 50.86 2.69
 -4 2 -7 0.99 0.56
 -4 -2 -7 1 0.58
 4 -2 -7 0.61 0.31
 -4 2 -8 5.13 1.04
 -4 -2 -8 7 1.29
 -4 2 9 0.72 0.43
 -4 -2 9 -0.96 0.54
 -4 -2 -9 -0.2 0.29
 -4 2 -9 -0.47 0.62
 -4 2 9 -0.39 0.44
 4 2 9 -0.12 0.41
 -4 2 -9 0.41 0.35
 4 -2 9 -0.19 0.39
 -4 -2 -9 0.53 0.67
 -4 -2 -10 9.39 0.78
 -4 2 -10 11.46 0.93
 -4 2 -10 10.71 1.63
 -4 -2 10 10 0.91
 -4 2 10 10.44 0.96
 4 2 10 11.58 1.03
 -4 -2 -10 12.14 1.8
 4 -2 10 12.28 1.08
 4 2 11 0.19 0.53
 -4 -2 -11 0.27 0.36
 4 -2 11 0.33 0.55
 -4 -2 11 -0.03 0.44
 -4 -2 -11 0.89 0.61
 -4 2 11 0.35 0.46
 -4 2 -11 -0.07 0.36
 -4 2 12 7.13 0.93
 -4 -2 -12 7.64 0.8
 -4 -2 12 8.42 0.99
 4 -2 12 8.29 1.05
 -4 2 -12 6.99 0.83
 4 2 12 8.82 1.11
 -4 -2 -13 0.23 0.41
 -4 2 -13 0.74 0.52
 -4 2 13 1.39 0.66
 -4 -2 13 0.7 0.63
 4 -2 13 1.26 0.77
 4 2 13 1.49 0.83
 -4 -2 -14 12.76 1.05
 -4 -2 14 11.41 1.24
 4 2 14 14.77 1.49
 -4 2 14 11.42 1.16
 -4 2 -14 11.58 1.03
 4 -2 14 12.74 1.41
 -4 2 15 -0.48 0.65
 -4 2 -15 0.31 0.38
 4 -2 15 0.9 0.74
 4 2 15 1.91 0.94
 -4 -2 15 -0.22 0.67
 -4 2 16 14 1.41
 -4 2 -16 15.58 1.19
 -4 -2 16 15.19 1.41
 4 -2 16 16.97 1.6
 -4 2 -17 0.44 0.51
 -4 -2 17 -0.16 0.51
 4 2 -17 -0.54 0.42
 -4 2 17 -0.12 0.49
 -4 -2 18 3.78 0.8
 -4 2 18 5.84 0.89
 -4 -2 19 1.02 0.53
 -4 2 19 1.45 0.54
 -4 -4 0 324.62 4.36
 -4 -4 -1 0.04 0.3
 -4 -4 1 0.03 0.21
 -4 -4 1 0.16 0.18
 -4 -4 -2 124.08 3.26
 -4 -4 2 123.37 2.49
 -4 4 -3 4.31 0.7
 -4 -4 -3 4.92 0.81
 -4 -4 3 4.41 0.66
 -4 -4 4 115.19 3.34
 -4 4 -4 118.45 3.53
 -4 -4 -4 114.61 3.74
 4 -4 -4 118.71 3.1
 -4 4 -5 5.73 0.88
 -4 4 5 5.1 0.88
 -4 -4 -5 6.77 1.08
 4 -4 -5 6.38 0.85
 4 -4 -6 1.46 0.49
 -4 -4 -6 1.24 0.7
 -4 4 6 2.63 0.96
 -4 4 -6 1.9 0.62
 -4 4 -7 0.44 0.44
 -4 -4 -7 0.84 0.59
 4 -4 -7 0.79 0.39
 -4 -4 -8 5.25 1.13
 4 4 8 5.64 0.71
 -4 -4 8 5.34 0.65
 4 -4 8 4.87 0.68
 -4 4 -8 4.82 1.01
 -4 -4 9 1.03 0.34
 -4 4 9 1.82 0.48
 -4 4 9 1.81 0.47
 -4 -4 -9 1.6 0.8
 4 4 9 1.53 0.52
 4 -4 9 1.14 0.43
 -4 4 10 1.02 0.49
 -4 -4 10 0.36 0.39
 -4 -4 -10 0.61 0.28
 -4 4 -10 0.98 0.47
 -4 4 10 1.65 0.54
 -4 -4 -10 0.84 0.8
 4 4 10 1.28 0.53
 4 -4 10 0.86 0.49
 -4 -4 11 0.29 0.41
 -4 -4 -11 0.6 0.56
 -4 -4 -11 0.34 0.3
 -4 4 11 0.59 0.54
 4 -4 11 0.62 0.51
 4 4 11 1.13 0.64
 -4 4 -11 0.57 0.41
 -4 4 -12 0.11 0.43
 -4 -4 12 0.15 0.46
 4 4 12 1.05 0.61
 -4 -4 -12 0.09 0.66
 4 -4 12 -0.18 0.52
 -4 4 12 0.54 0.58
 4 -4 13 0.56 0.64
 4 4 13 1.08 0.76
 -4 -4 13 0.13 0.55
 -4 4 -13 0.12 0.4
 -4 -4 14 2.26 0.82
 -4 4 -14 0.6 0.46
 4 -4 14 0.43 0.67
 4 4 14 1.68 0.9
 -4 4 -15 -0.15 0.44
 -4 -4 15 -0.31 0.71
 -4 4 15 -0.99 0.7
 4 -4 15 0.02 0.68
 -4 4 -16 0.63 0.43
 4 -4 16 0.85 0.77
 -4 4 16 0.09 0.55
 -4 -4 16 -0.05 0.63
 -4 4 -17 0.37 0.49
 4 4 -17 0.44 0.42
 -4 4 17 0.63 0.54
 -4 -4 17 -0.2 0.57
 -4 -4 18 0.18 0.47
 -4 4 -18 0.47 0.35
 4 4 -18 -0.25 0.33
 -4 -4 19 0.57 0.47
 -4 -6 0 206.76 4
 -4 -6 1 3.12 0.32
 -4 -6 -1 3.78 0.71
 -4 -6 1 3.23 0.52
 -4 -6 2 18.43 0.92
 -4 -6 -2 18.61 1.45
 -4 -6 2 18.62 1
 -4 -6 -3 9.08 1.1
 -4 -6 3 7.63 0.55
 -4 -6 -4 59.61 2.8
 -4 -6 4 29.38 0.8
 -4 -6 -5 1.74 0.75
 4 -6 -5 1.86 0.61
 -4 6 5 2.2 0.78
 4 -6 -6 1.7 0.56
 -4 6 6 2.96 0.92
 -4 -6 -6 2.38 0.89
 -4 6 7 0.48 0.81
 4 -6 -7 -0.15 0.41
 -4 -6 -7 -0.31 0.64
 -4 -6 -8 11.99 1.69
 -4 -6 8 12.18 0.92
 4 6 8 10.11 0.93
 4 -6 8 9.78 0.88
 -4 6 9 3.21 0.58
 -4 -6 9 2.73 0.53
 -4 6 9 3.12 0.58
 4 6 9 3.41 0.67
 4 -6 9 3.1 0.68
 -4 -6 -9 3.49 1.07
 4 -6 10 31.18 1.75
 -4 -6 -10 33.85 3.03
 -4 6 10 31.65 1.57
 4 6 10 34.47 1.78
 -4 6 10 34.44 1.72
 -4 -6 10 32.23 1.68
 -4 6 -10 31.03 1.5
 4 6 11 3.68 0.89
 -4 6 11 2.13 0.63
 -4 -6 -11 3.17 1.17
 -4 6 11 2.65 0.66
 -4 6 -11 2.15 0.58
 4 -6 11 1.76 0.63
 -4 -6 11 2 0.61
 -4 6 -12 10.47 1.01
 4 -6 12 10.76 1.19
 -4 6 12 11.52 1.15
 -4 -6 12 10.15 1.11
 -4 -6 -12 10.99 1.84
 4 6 12 13.9 1.29
 -4 6 -13 1.8 0.66
 -4 6 13 -0.77 0.91
 4 -6 13 1.3 0.73
 4 6 13 2.28 0.8
 -4 -6 13 0.58 0.68
 -4 6 -14 1.3 0.55
 -4 6 14 -0.11 0.73
 4 -6 14 1.58 0.73
 4 -6 15 -0.72 0.67
 -4 -6 15 -1.51 0.82
 -4 6 -15 -0.48 0.51
 -4 6 15 -0.74 0.65
 -4 6 -16 0.79 0.45
 4 -6 16 1.51 0.74
 -4 6 16 1.74 0.66
 -4 -6 16 0.81 0.62
 -4 6 -17 -0.63 0.43
 -4 -6 17 0.12 0.54
 -4 6 -18 5 0.67
 4 6 -18 4.73 0.68
 -4 -6 18 4.29 0.8
 -4 -6 19 0.49 0.41
 -4 -8 0 198.96 4.42
 -4 -8 -1 6.84 0.97
 -4 -8 1 5.6 0.75
 -4 -8 2 9.88 0.88
 -4 -8 -2 9.13 1.13
 -4 -8 -3 19.17 1.69
 -4 -8 3 19.09 1.11
 -4 -8 -4 32.22 2.26
 -4 8 4 33.91 2.03
 4 -8 -5 0.2 0.54
 -4 -8 -5 0.02 0.53
 -4 8 5 0.51 0.58
 -4 -8 -6 1.95 0.81
 -4 8 6 2.59 0.84
 4 -8 -6 1.8 0.66
 -4 8 7 0.71 0.9
 4 -8 -7 0.57 0.61
 -4 -8 -7 1.13 0.77
 -4 -8 -8 8.37 1.54
 4 -8 8 9.08 0.89
 -4 -8 8 9.06 0.83
 4 -8 -8 7.97 1.26
 -4 8 8 9.75 0.84
 4 8 8 9.19 0.86
 -4 8 9 4.51 0.64
 -4 -8 -9 6.68 1.44
 -4 8 9 5.23 0.71
 4 8 9 5.7 0.83
 4 -8 9 4.09 0.63
 -4 -8 9 5.17 0.67
 -4 8 -10 108.02 2.77
 -4 -8 10 111.26 3.06
 -4 8 10 106.51 2.86
 -4 -8 -10 112.55 5.64
 4 8 10 112.19 3.11
 4 -8 10 109.86 3.2
 -4 8 10 111.95 3.09
 -4 -8 -11 9.67 1.87
 -4 -8 11 8.85 1.08
 4 8 11 11.91 1.25
 -4 8 11 9.29 1.02
 -4 8 -11 10.17 0.98
 4 -8 11 8.72 1.08
 -4 8 11 11.2 1.13
 -4 8 -12 36.6 1.79
 4 8 12 40 2.08
 -4 8 12 37.74 2.01
 -4 -8 12 36.93 1.97
 -4 8 12 35.27 1.77
 -4 -8 -12 34.69 3.48
 4 -8 12 36.93 2.05
 -4 8 -13 0.33 0.51
 -4 -8 13 0.94 0.65
 4 -8 13 -0.3 0.64
 -4 8 13 -0.72 0.74
 -4 8 -14 4.54 0.76
 -4 -8 14 6.04 1.12
 -4 8 14 2.49 0.63
 4 -8 14 3.95 0.92
 -4 -8 15 -0.93 0.92
 -4 8 -15 -0.15 0.47
 4 -8 15 -0.05 0.62
 -4 8 15 -0.54 0.56
 -4 -8 16 2.75 0.76
 -4 8 -16 3.3 0.65
 4 -8 16 4.95 1.03
 -4 8 16 4.87 0.87
 -4 8 17 1.69 0.66
 -4 -8 17 0.48 0.54
 -4 8 -17 0.38 0.4
 4 8 -18 12.56 1.04
 -4 -8 18 12.4 1.16
 -4 8 -18 11.4 0.99
 4 8 -19 0.8 0.35
 -4 -8 19 1.69 0.53
 -4 -10 0 101.25 3.43
 -4 -10 1 17.19 1.39
 -4 -10 -1 17.85 1.62
 -4 10 1 16.4 1.26
 -4 10 2 44.34 2.09
 -4 -10 -2 46.76 2.63
 -4 -10 2 44.99 2.1
 -4 -10 -3 5.07 1.03
 -4 10 3 4.1 0.75
 -4 -10 -4 25.08 2.12
 -4 10 4 25.04 1.84
 -4 10 5 0.33 0.66
 4 -10 -5 -0.28 0.58
 -4 -10 -5 0.18 0.57
 -4 10 6 23.43 2
 -4 -10 -6 22.85 2.16
 4 -10 -6 22.9 2.18
 4 -10 -7 0.46 0.69
 -4 -10 -7 0.44 0.78
 -4 10 7 1.7 0.93
 -4 -10 -8 17.8 2.18
 4 10 8 16.38 1.16
 4 -10 -8 16.17 1.88
 4 -10 8 15.5 1.19
 -4 10 8 17.02 1.08
 -4 -10 8 16.39 1.13
 4 10 9 8.5 0.93
 4 -10 9 6.62 0.88
 -4 10 9 8.88 0.89
 -4 -10 -9 8.17 1.65
 -4 -10 9 6.92 0.8
 -4 10 9 6.23 0.74
 4 -10 10 64.31 2.5
 -4 10 -10 64.4 2.2
 -4 -10 10 66.79 2.42
 -4 10 10 62.74 2.22
 -4 -10 -10 67.53 4.48
 4 10 10 66.49 2.46
 -4 10 10 63.84 2.32
 -4 -10 11 12.1 1.23
 -4 -10 -11 13.03 2.08
 -4 10 11 13.23 1.11
 4 -10 11 13.02 1.28
 -4 10 11 13.22 1.21
 -4 10 -11 12.27 1.09
 -4 10 -12 11.33 1.1
 -4 10 12 10.77 1.05
 -4 10 12 9.93 1.09
 4 -10 12 11.39 1.21
 -4 -10 12 11.49 1.19
 -4 -10 -12 9.87 1.98
 4 -10 13 2.64 0.9
 -4 10 -13 2.2 0.66
 -4 -10 13 2.7 0.8
 -4 10 13 1.27 0.6
 4 -10 14 1.2 0.73
 -4 10 -14 1.71 0.57
 -4 10 14 1.63 0.57
 -4 -10 14 3.26 0.9
 4 -10 15 0.19 0.63
 -4 10 15 0.84 0.59
 -4 10 -15 0.08 0.46
 -4 -10 15 -1.39 1
 -4 10 -16 4.68 0.76
 4 -10 16 4.91 1.07
 -4 10 16 5.69 0.91
 -4 -10 16 5.11 0.91
 4 10 -17 0.78 0.56
 -4 10 -17 0 0.41
 -4 -10 17 -0.09 0.54
 4 10 -18 6.23 0.82
 -4 10 -18 7.28 0.81
 -4 -10 18 6.82 0.92
 -4 -10 19 2.72 0.63
 -4 -12 0 35.71 2.26
 -4 -12 -1 6.75 1.12
 -4 -12 1 7.62 1.1
 -4 12 1 6.83 0.9
 -4 -12 2 2.82 0.69
 -4 12 2 2.73 0.65
 -4 -12 -2 2.57 0.87
 -4 -12 -3 0.22 0.7
 -4 12 3 0.02 0.46
 -4 12 4 1.47 0.61
 -4 -12 -4 1.85 0.91
 -4 -12 -5 0.09 0.65
 -4 12 5 0.34 0.54
 4 -12 -5 -0.37 0.59
 4 -12 -6 37.39 2.88
 -4 -12 -6 40.63 3.04
 -4 12 6 39.92 2.76
 -4 -12 -7 0.97 0.85
 -4 -12 7 1.36 0.46
 -4 12 7 0.86 0.8
 -4 12 7 0.74 0.37
 4 -12 -7 0.67 0.57
 -4 12 8 20.2 1.22
 -4 -12 8 19.21 1.23
 -4 12 8 18.13 1.23
 -4 -12 -8 22.32 2.47
 4 -12 -8 19.71 2.22
 4 -12 8 17.17 1.22
 -4 12 -9 6.51 0.77
 -4 -12 -9 6.81 1.5
 -4 12 9 4.21 0.57
 4 -12 9 5.27 0.81
 -4 -12 9 6.22 0.8
 -4 12 9 6.6 0.84
 -4 -12 -10 23.64 2.81
 -4 12 10 19.96 1.32
 4 -12 10 22.7 1.56
 -4 12 -10 24 1.39
 -4 12 10 23.45 1.47
 -4 -12 10 24.49 1.57
 -4 12 -11 2.36 0.58
 -4 -12 11 1.92 0.66
 -4 12 11 1.86 0.56
 4 -12 11 1.97 0.72
 -4 12 11 1.62 0.49
 -4 -12 -11 2.12 1.11
 -4 12 -12 1.96 0.64
 -4 -12 -12 1.72 0.95
 -4 12 12 1.93 0.56
 -4 -12 12 2.7 0.72
 -4 12 12 2.25 0.61
 4 -12 12 1.92 0.73
 -4 12 13 0.21 0.49
 -4 12 13 1.49 0.71
 -4 -12 13 0.83 0.63
 4 -12 13 0.97 0.69
 -4 12 -13 0.73 0.56
 -4 12 14 1.23 0.61
 -4 12 -14 0.47 0.51
 4 -12 14 1.4 0.78
 -4 -12 14 0.61 0.84
 -4 12 15 1.66 0.68
 4 -12 15 1.02 0.7
 -4 12 -15 -0.2 0.58
 -4 -12 15 -1.29 0.84
 4 -12 16 0.77 0.7
 -4 12 16 1.59 0.62
 -4 -12 16 -0.11 0.66
 -4 12 -16 -0.31 0.48
 -4 12 -17 0.11 0.44
 4 12 -17 0.35 0.46
 -4 -12 17 -0.73 0.59
 -4 12 -18 2.11 0.54
 4 12 -18 1.96 0.52
 -4 -12 18 3.15 0.72
 -4 -12 19 1.34 0.49
 -4 -14 0 27.12 2.14
 -4 14 0 25.48 1.73
 -4 -14 -1 1.11 0.73
 -4 -14 1 0.44 0.48
 -4 14 1 1.12 0.58
 -4 -14 2 0.3 0.46
 -4 14 2 -0.11 0.43
 -4 -14 -2 0.5 0.64
 -4 14 3 2.8 0.67
 -4 -14 -3 3.92 1.03
 -4 14 4 20.24 1.79
 -4 -14 -4 20.47 2.16
 -4 14 5 62.62 3.24
 -4 -14 -5 68.88 3.99
 4 -14 -5 64.44 3.75
 -4 14 -6 39.43 1.52
 -4 -14 -6 42.55 3.23
 -4 14 6 38.47 2.8
 -4 14 6 36.58 1.46
 4 -14 -6 37.2 3.07
 -4 14 7 2.59 0.54
 -4 -14 -7 2.7 0.97
 -4 14 -7 3.17 0.53
 -4 14 7 3.08 0.54
 -4 14 7 3.77 1.21
 4 -14 -7 2.5 1.01
 -4 -14 7 2.87 0.57
 4 -14 -8 0.43 0.62
 -4 -14 8 0.46 0.44
 -4 14 8 1.28 1.02
 -4 14 -8 0.16 0.38
 -4 14 8 -0.15 0.44
 -4 -14 -8 -0.05 0.76
 -4 14 8 0.61 0.53
 4 -14 8 0.37 0.36
 -4 -14 9 0.47 0.44
 -4 14 -9 0.67 0.45
 -4 -14 -9 0.4 0.81
 4 -14 9 -0.22 0.51
 -4 14 9 0.84 0.47
 -4 14 -10 0.27 0.5
 -4 -14 10 -0.56 0.53
 -4 14 10 0.01 0.4
 4 -14 10 -0.02 0.6
 -4 -14 -10 0.72 0.88
 -4 -14 11 0.91 0.58
 -4 -14 -11 0.37 0.65
 -4 14 -11 1.05 0.53
 4 -14 11 0.74 0.58
 -4 14 11 0.06 0.44
 4 -14 12 9.47 1.25
 -4 14 12 10.01 1.07
 -4 -14 -12 8.95 1.91
 -4 -14 12 12.23 1.28
 -4 14 -12 11.27 1.1
 -4 14 13 2.13 0.65
 -4 -14 13 1.15 0.66
 -4 14 -13 1.49 0.6
 4 -14 13 2.22 0.81
 4 -14 14 7.1 1.15
 -4 14 -14 7.61 0.98
 -4 -14 14 7.51 1.12
 4 -14 15 3.77 1
 -4 14 -15 3.46 0.68
 -4 -14 15 2.3 0.71
 -4 14 -16 4.4 0.77
 -4 -14 16 2.71 0.79
 -4 -14 17 0.35 0.5
 4 14 -17 1.66 0.57
 -4 14 -17 0.79 0.41
 4 14 -18 0.03 0.35
 -4 -14 18 0.76 0.46
 -4 14 -18 0.24 0.35
 -4 16 0 10.62 1.22
 -4 -16 0 11.6 1.6
 -4 -16 -1 0.35 0.62
 -4 -16 1 0.67 0.56
 -4 16 1 0.46 0.46
 -4 -16 2 0.09 0.49
 -4 -16 -2 0.62 0.71
 -4 16 2 0.08 0.45
 -4 -16 -3 13.82 1.9
 -4 16 3 12.83 1.43
 -4 16 4 234.75 6.06
 -4 -16 -4 265.29 7.86
 -4 16 5 48.01 1.67
 -4 -16 -5 55.82 3.8
 -4 16 5 52.65 3.04
 4 -16 -5 52.93 3.57
 -4 16 -6 24.16 1.29
 -4 16 6 24.88 1.28
 -4 -16 -6 25.91 2.69
 4 -16 -6 26.5 2.7
 -4 16 6 21.84 1.27
 -4 16 6 23.48 2.21
 -4 -16 7 20.03 1.3
 -4 16 -7 23.29 1.28
 4 -16 -7 22.38 2.7
 -4 16 7 23.25 2.4
 -4 16 7 21.69 1.23
 -4 -16 -7 21.18 2.52
 -4 16 7 20.67 1.3
 -4 16 8 3.48 0.73
 -4 -16 8 3.89 0.7
 -4 16 8 3.36 0.6
 -4 16 -8 3.1 0.61
 -4 16 8 4.32 1.33
 4 -16 -8 2.51 1.05
 -4 -16 -8 3.69 1.29
 4 -16 9 4.11 0.69
 -4 -16 -9 6.2 1.52
 4 -16 -9 4.28 1.33
 -4 16 -9 6.26 0.84
 -4 -16 9 4.51 0.72
 -4 16 9 5.18 0.77
 -4 16 10 0.59 0.52
 -4 -16 10 -0.07 0.57
 -4 16 -10 0.87 0.54
 4 -16 10 0.24 0.44
 -4 -16 -10 0.62 0.66
 -4 -16 -11 1.87 1.03
 -4 16 11 1.83 0.63
 -4 -16 11 1.27 0.65
 -4 16 -11 2.71 0.73
 4 -16 11 1.59 0.63
 -4 16 12 4.65 0.76
 4 -16 12 5.6 0.97
 -4 16 -12 5.66 0.86
 -4 -16 -12 3.32 1.22
 -4 -16 12 5.5 0.99
 -4 -16 13 10.51 1.28
 -4 16 13 8.71 1.03
 4 -16 13 9.23 1.26
 -4 16 -13 10.21 1.1
 4 -16 14 10.48 1.27
 -4 16 14 10.14 1.06
 -4 16 -14 8.97 1.01
 -4 -16 14 8.98 1.18
 -4 16 -15 9.02 0.99
 -4 -16 15 7.2 1.09
 4 -16 15 8.12 1.17
 -4 -16 16 7.82 1.07
 -4 16 -16 9.95 1.03
 4 16 -17 2.04 0.58
 -4 16 -17 2.6 0.58
 -4 -16 17 3.44 0.76
 4 16 -18 3.23 0.57
 -4 16 -18 5.03 0.7
 -4 -16 18 3.86 0.74
 -4 -18 0 1.59 0.87
 -4 18 0 1.46 0.64
 -4 18 -1 -0.12 0.42
 -4 -18 -1 0.31 0.68
 -4 -18 1 -0.63 0.57
 -4 18 1 -0.02 0.38
 -4 -18 -2 3.65 1.13
 -4 -18 2 4.01 1.01
 -4 18 2 3.5 0.76
 -4 -18 -3 94.16 4.91
 -4 18 3 85.3 3.68
 -4 18 4 54.86 3.08
 -4 -18 -4 60.8 4.03
 -4 18 4 53.79 1.8
 -4 18 -5 64.79 1.98
 4 -18 -5 76.3 4.54
 -4 -18 -5 80.31 4.72
 -4 18 5 74.34 3.74
 -4 18 5 63.26 2.13
 -4 18 5 70.95 2.1
 -4 18 -6 42.04 1.71
 -4 18 6 37.75 1.71
 -4 -18 -6 42.52 3.56
 -4 -18 6 35.76 1.66
 4 -18 -6 42.82 3.55
 -4 18 6 41.98 3
 -4 18 6 40.14 1.69
 4 18 6 35.26 1.58
 -4 18 -7 19.82 1.25
 -4 18 7 19.11 1.32
 4 -18 -7 21.02 2.81
 -4 18 7 17.48 2.18
 -4 -18 -7 20.98 2.62
 -4 -18 7 18.46 1.27
 4 18 7 16.47 1.12
 -4 18 7 19.75 1.21
 -4 18 8 19.18 1.37
 -4 18 -8 19.96 1.32
 4 -18 -8 18.73 2.6
 -4 -18 -8 20.6 2.77
 4 18 8 15.19 1.13
 -4 18 8 19.45 1.28
 -4 -18 8 20.36 1.38
 -4 18 9 0.62 0.43
 -4 18 -9 0.89 0.47
 -4 -18 9 0.58 0.51
 4 -18 -9 1.06 0.96
 -4 -18 -9 0.66 0.73
 -4 18 10 3.24 0.68
 -4 -18 10 3.09 0.7
 -4 -18 -10 3.95 1.53
 -4 18 -10 3.75 0.74
 -4 -18 -11 2.27 1.2
 -4 -18 11 1.29 0.64
 4 -18 11 0.94 0.56
 -4 18 -11 1.72 0.59
 -4 18 -12 10.97 1.1
 4 -18 12 9.4 1.22
 -4 18 12 8.69 1.05
 -4 -18 12 9.24 1.19
 -4 18 -13 4.98 0.83
 -4 -18 13 4.59 1.01
 -4 18 13 3.86 0.77
 4 -18 13 4.99 0.94
 -4 18 -14 12.1 1.18
 -4 18 14 11.35 1.13
 4 -18 14 12.12 1.36
 -4 -18 14 9.84 1.19
 -4 18 -15 12.66 1.17
 -4 -18 15 11.22 1.28
 4 18 -16 10.04 1.1
 -4 18 -16 8.73 0.99
 -4 -18 16 6.39 1
 -4 18 -17 4.86 0.69
 4 18 -17 5.83 0.79
 -4 -18 17 4.19 0.81
 -4 18 -18 2.62 0.54
 4 18 -18 1.94 0.46
 -4 20 0 51.59 2.79
 -4 -20 0 52.77 3.68
 -4 -20 1 5.89 1.26
 -4 20 1 4.79 0.94
 -4 -20 -1 6.09 1.39
 -4 20 -1 5.04 0.94
 -4 20 2 34.58 2.36
 -4 20 2 33.29 1.43
 -4 -20 2 37.93 3.05
 -4 -20 -2 39.62 3.38
 -4 20 3 32.43 1.45
 -4 20 3 33.46 2.4
 -4 20 3 30.94 1.42
 -4 -20 3 32.16 2.79
 -4 -20 -3 35.44 3.21
 -4 20 4 21.29 1.25
 -4 20 4 21.27 2.06
 -4 20 4 23.13 1.28
 -4 -20 -4 23.39 2.73
 -4 20 5 12.98 1.02
 4 -20 -5 14.32 2.17
 -4 20 5 14.19 1.01
 -4 -20 -5 14.54 2.24
 -4 20 5 12.76 1.65
 -4 20 -5 12.18 0.91
 -4 20 -6 23.65 1.32
 -4 -20 -6 24.51 2.92
 -4 20 6 21.91 1.31
 -4 20 6 22.66 2.33
 -4 20 6 22.35 1.37
 4 -20 -6 22.07 2.75
 4 20 6 22.39 1.34
 -4 20 -7 10.05 0.91
 -4 -20 -7 10.17 1.93
 -4 -20 7 8.78 0.98
 4 -20 -7 9.47 1.96
 -4 20 7 10.02 0.91
 4 20 7 9.02 0.91
 -4 20 7 9.95 1.03
 -4 20 7 8.09 1.59
 -4 -20 8 -0.6 0.58
 -4 20 8 1.23 0.55
 4 -20 -8 0.37 0.77
 -4 20 -8 0.91 0.45
 4 20 8 1.09 0.5
 -4 20 8 0.24 0.41
 -4 -20 -8 0.96 0.93
 -4 20 9 1.14 0.64
 -4 -20 9 0.23 0.55
 -4 20 -9 1.49 0.58
 -4 -20 -9 0.33 0.83
 -4 20 9 0.12 0.53
 4 -20 -9 0.25 0.71
 -4 20 -10 0.58 0.48
 -4 -20 10 0.29 0.51
 -4 20 10 0.08 0.49
 -4 -20 -10 -0.25 0.66
 -4 -20 -11 1.62 1.28
 -4 -20 11 0.11 0.61
 -4 20 -11 -0.08 0.46
 -4 20 11 0.87 0.65
 -4 -20 12 0.24 0.53
 -4 -20 -12 -0.43 0.72
 -4 20 -12 0.4 0.53
 -4 20 12 0.5 0.48
 -4 20 13 1.8 0.55
 -4 20 -13 2.52 0.66
 -4 -20 13 2.67 0.83
 -4 20 -14 0.73 0.47
 -4 20 14 2.12 0.64
 -4 -20 14 0.31 0.69
 -4 -20 15 7.05 1.04
 -4 20 -15 7.73 0.95
 -4 20 -16 5.41 0.8
 4 20 -16 6.69 0.91
 -4 -20 16 4.51 0.86
 4 20 -17 1.46 0.53
 -4 -20 17 1.51 0.53
 -4 20 -17 0.85 0.44
 -4 22 0 10.36 1.38
 -4 -22 0 12.63 2.1
 -4 -22 -1 24.89 2.76
 -4 -22 1 26.19 2.79
 -4 22 -1 25.12 2.05
 -4 22 1 23.9 1.27
 -4 22 1 23.8 2.04
 -4 -22 -2 2.52 1.23
 -4 22 2 0.48 0.37
 -4 22 2 1.54 0.45
 -4 22 -2 1.58 0.69
 -4 22 2 1.58 0.57
 -4 -22 2 0.71 0.66
 -4 -22 3 12.48 1.91
 -4 22 3 10.95 0.91
 -4 -22 -3 12.91 2.05
 -4 22 3 12.01 1.56
 -4 22 3 11.59 0.97
 -4 22 -4 3.22 0.5
 -4 22 4 4.14 0.64
 -4 22 4 3.75 0.95
 -4 22 4 4.26 0.66
 -4 -22 -4 4.19 1.34
 -4 -22 4 4.81 1.24
 -4 -22 5 2.53 0.91
 -4 22 -5 2.48 0.49
 -4 22 5 2.5 0.87
 -4 22 5 2.16 0.5
 -4 22 5 2.35 0.55
 -4 -22 -5 1.89 1.11
 4 -22 -5 1.84 1.1
 -4 22 6 0.86 0.79
 4 22 6 0.22 0.43
 -4 -22 -6 0.2 0.89
 -4 22 -6 0.17 0.37
 4 -22 -6 0.36 0.73
 -4 22 6 -0.05 0.4
 -4 22 6 0.4 0.46
 -4 22 -7 0.96 0.47
 4 -22 -7 -0.6 1.05
 4 22 7 -0.22 0.39
 -4 22 7 0.16 0.48
 -4 22 7 1.39 0.88
 -4 -22 -7 0.69 0.87
 -4 22 7 0.9 0.52
 -4 22 8 2.01 0.56
 4 22 8 2.25 0.59
 -4 22 8 1.84 0.58
 -4 -22 -8 1.05 0.76
 -4 22 -8 2.31 0.61
 4 -22 -8 1.25 0.83
 -4 -22 -9 3.77 1.35
 4 -22 -9 3.55 1.39
 4 22 9 4.33 0.73
 -4 22 -9 5.37 0.81
 -4 22 9 4.66 0.8
 -4 -22 9 4.93 0.86
 -4 22 9 5.68 0.86
 -4 -22 10 0.74 0.63
 -4 22 -10 0.63 0.46
 -4 22 10 0.58 0.57
 -4 -22 -10 0.24 0.78
 -4 -22 11 6.56 1.04
 -4 22 -11 5.39 0.83
 -4 22 11 6.1 0.99
 -4 -22 -11 4.01 1.53
 -4 -22 12 0.19 0.51
 -4 22 -12 -0.34 0.52
 -4 22 12 0.66 0.57
 -4 -22 13 0.39 0.57
 -4 22 13 0.53 0.48
 -4 22 -13 1.17 0.61
 -4 22 -14 0.58 0.49
 -4 22 14 0.43 0.49
 -4 -22 14 -0.33 0.65
 -4 22 -15 0.14 0.5
 4 22 -15 0.09 0.49
 -4 -22 15 0 0.5
 -4 22 -16 -0.29 0.45
 -4 -22 16 0.26 0.43
 4 22 -16 0.05 0.44
 -4 22 -17 -0.36 0.37
 4 22 -17 -0.02 0.34
 -4 24 0 23.62 2.09
 -4 -24 0 25.77 2.97
 -4 -24 1 60.86 4.43
 -4 24 1 61.74 2.06
 -4 -24 -1 60.83 4.53
 -4 24 1 55.92 3.23
 -4 24 -1 57.89 3.23
 -4 -24 -2 12.34 2.23
 -4 24 2 11.83 1.6
 -4 24 -2 11.8 1.52
 -4 24 2 11.72 0.95
 -4 -24 2 13.36 2.14
 -4 24 2 11.63 0.97
 -4 24 3 6.39 1.16
 -4 -24 -3 7.08 1.69
 -4 24 3 7.64 0.83
 -4 -24 3 6.78 1.51
 -4 24 3 5.8 0.71
 -4 24 -3 7.03 1.21
 -4 -24 -4 0.08 0.93
 4 -24 -4 -1.27 1.12
 -4 -24 4 -0.19 0.69
 -4 24 4 -0.09 0.41
 -4 24 4 -0.34 0.49
 -4 24 4 0.56 0.57
 -4 24 5 -0.03 0.43
 4 -24 -5 -0.08 0.8
 -4 -24 -5 -0.37 0.73
 -4 24 5 -0.18 0.53
 -4 24 -5 0.07 0.3
 -4 24 5 0.16 0.6
 4 -24 -6 -1.04 0.98
 -4 24 -6 0.3 0.37
 -4 24 6 -0.4 0.42
 -4 24 6 -0.36 0.46
 -4 -24 -6 1.84 1.21
 -4 24 6 0.74 0.91
 4 24 6 0.3 0.51
 -4 24 7 23.16 1.47
 -4 24 7 22.16 2.7
 4 -24 -7 20.21 3.06
 4 24 7 23.19 1.52
 -4 24 -7 25.85 1.47
 -4 -24 -7 22.03 2.98
 -4 24 7 22.77 1.47
 4 24 8 3.66 0.75
 -4 -24 -8 2.48 1.29
 -4 24 -8 3.86 0.67
 -4 24 8 3.33 0.62
 4 -24 -8 3.35 1.41
 -4 24 8 3.86 0.76
 -4 24 -9 33.4 1.74
 4 24 9 30.62 1.75
 -4 -24 -9 28.57 3.52
 -4 24 9 33.21 1.88
 -4 -24 -10 7.7 2
 -4 24 10 11.63 1.22
 -4 24 -10 10.34 1.05
 -4 24 -11 2.99 0.66
 -4 24 11 4.38 0.85
 -4 24 -12 10.27 1.09
 -4 -24 12 10.26 1.2
 -4 24 12 10.07 1.14
 -4 24 -13 1.62 0.51
 -4 -24 13 1.66 0.55
 -4 24 13 2.16 0.58
 -4 24 14 1.39 0.55
 -4 -24 14 0.75 0.51
 -4 24 -14 1.2 0.51
 -4 24 -15 -0.14 0.47
 4 24 -15 0.39 0.42
 4 24 -16 -0.16 0.39
 -4 24 -16 0.45 0.43
 -4 24 -17 1.12 0.4
 4 24 -17 0.94 0.4
 -4 26 0 24.72 1.39
 -4 -26 0 24.38 3.09
 -4 -26 1 57.93 4.63
 -4 -26 -1 58.95 4.79
 -4 26 1 54.79 2.15
 -4 26 1 52.44 3.28
 -4 26 1 57.48 2.11
 -4 -26 2 6.37 1.59
 -4 -26 -2 6.01 1.72
 -4 26 2 6.04 0.8
 -4 26 2 6.75 0.83
 -4 26 2 5.91 1.18
 -4 26 3 29.36 1.62
 -4 26 3 34.79 1.71
 -4 26 3 29.91 2.58
 -4 -26 3 33.24 3.49
 -4 -26 -3 34.77 3.68
 -4 26 4 2.44 0.85
 -4 -26 4 3.97 1.3
 -4 -26 -4 1.86 0.88
 -4 26 4 3.32 0.67
 4 -26 -4 3.02 1.29
 -4 26 4 3.35 0.64
 -4 26 5 0.47 0.43
 4 -26 -5 -0.02 0.73
 -4 26 5 0.68 0.74
 -4 26 5 0.09 0.52
 -4 -26 -5 0.16 0.96
 -4 26 -6 0.01 0.38
 -4 26 6 0.83 0.83
 -4 26 6 0.31 0.47
 4 26 6 0.86 0.55
 4 -26 -6 0.49 0.92
 -4 26 6 0.58 0.55
 -4 -26 -6 1.05 1.01
 -4 26 -7 11.18 1.05
 4 -26 -7 10.23 2.27
 -4 -26 -7 10.85 2.31
 -4 26 7 10.43 1.07
 4 26 7 11.59 1.13
 -4 26 7 10.5 1.12
 -4 -26 -8 10.82 2.3
 4 26 8 12.52 1.22
 4 -26 -8 8.08 2.05
 -4 26 8 11.58 1.16
 -4 26 -8 11.41 1.08
 4 26 9 31.02 1.85
 -4 26 -9 31.55 1.72
 -4 26 9 30.93 1.88
 -4 -26 -9 27.38 3.59
 -4 26 -10 6.26 0.87
 -4 26 10 5.91 1
 -4 26 11 33.22 2
 -4 26 -11 32.11 1.76
 -4 26 -12 1.02 0.5
 -4 26 12 1.14 0.56
 -4 26 13 7.98 0.99
 -4 26 -13 10.05 1.02
 4 26 -14 0.41 0.49
 -4 26 -14 0.84 0.43
 -4 26 14 1.57 0.56
 -4 26 -15 3.39 0.63
 4 26 -15 4.21 0.7
 -4 26 -16 -0.25 0.36
 4 26 -16 -0.11 0.33
 -4 28 0 6.12 0.79
 -4 -28 0 5.26 1.5
 -4 -28 1 42.27 4.23
 -4 -28 -1 40.54 4.27
 -4 28 1 41.89 1.98
 -4 28 1 40.46 1.84
 -4 -28 2 4.17 1.52
 -4 -28 -2 5.39 1.65
 -4 28 2 5.28 0.84
 -4 28 2 5.1 0.76
 4 -28 -3 10.51 2.15
 -4 -28 -3 12.1 2.36
 -4 28 3 12.65 1.1
 -4 -28 3 11.61 2.23
 -4 28 3 11.26 1.1
 -4 -28 -4 -0.39 0.84
 -4 -28 4 0.02 0.65
 4 -28 -4 -1.25 1.17
 -4 28 4 -0.4 0.59
 -4 28 4 0.01 0.48
 -4 28 5 0.11 0.49
 4 -28 -5 -0.25 0.86
 -4 28 5 0.05 0.49
 -4 -28 -5 0.93 1.24
 -4 28 6 0 0.43
 4 28 6 0.36 0.56
 4 -28 -6 -0.1 0.94
 -4 28 6 0.16 0.49
 -4 -28 -6 -0.32 0.79
 -4 -28 -7 5.49 1.58
 4 -28 -7 5.51 1.83
 -4 28 7 7.76 0.95
 4 28 7 7.24 0.98
 -4 28 -7 6.93 0.81
 -4 -28 -8 -0.18 0.95
 4 28 8 0.89 0.61
 -4 28 8 -0.8 0.78
 4 -28 -8 0.53 1.03
 -4 28 -8 0.47 0.38
 4 28 9 11.58 1.18
 -4 28 9 10.58 1.13
 -4 28 -9 11.52 1.08
 -4 28 10 9.15 1.15
 4 28 10 7.6 1.05
 -4 28 -10 8.75 0.99
 -4 28 -11 19.28 1.37
 -4 28 11 21.32 1.63
 -4 28 -12 1.81 0.56
 -4 28 12 3.5 0.84
 -4 28 -13 0.36 0.4
 -4 28 13 0.88 0.47
 4 28 -13 0.84 0.48
 -4 28 -14 -0.24 0.4
 -4 28 14 0.46 0.4
 4 28 -14 0.05 0.45
 -4 28 -15 0.74 0.42
 4 28 -15 0.65 0.42
 -4 30 0 2.44 0.73
 -4 30 0 1.63 0.6
 -4 -30 0 2.04 1.46
 -4 30 1 5.1 0.79
 -4 -30 1 4.58 1.7
 -4 30 -1 5.03 0.83
 -4 30 1 4.71 0.81
 -4 -30 -1 4.68 1.61
 -4 -30 2 0.61 0.84
 -4 -30 -2 1.61 1.36
 -4 30 2 0.89 0.58
 -4 30 2 1.33 0.61
 4 -30 -3 1.96 1.43
 -4 -30 -3 2.06 1.46
 -4 -30 3 1.18 1.12
 -4 30 3 1.22 0.56
 -4 30 3 1.02 0.47
 -4 30 4 -1.36 0.64
 4 -30 -4 0.36 0.86
 -4 30 4 -0.21 0.47
 -4 -30 -4 0.14 0.87
 -4 30 5 -0.44 0.57
 4 -30 -5 -0.25 0.88
 -4 -30 -5 -0.5 0.99
 4 30 5 0.46 0.57
 -4 30 5 0.12 0.47
 -4 -30 -6 1.02 1.01
 4 30 6 0.56 0.58
 -4 30 6 0.5 0.5
 -4 30 6 0.97 0.57
 4 -30 -6 1.22 1.22
 -4 -30 -7 7.56 2.03
 4 -30 -7 6.27 1.92
 4 30 7 9.09 1.07
 -4 30 7 6.98 0.85
 4 30 8 1.67 0.57
 -4 30 -8 1.4 0.45
 4 30 9 1.92 0.59
 -4 30 -9 1.4 0.43
 -4 30 9 2.05 0.57
 -4 30 -10 0.23 0.39
 -4 30 10 0.58 0.58
 4 30 10 0.5 0.47
 4 30 -11 10.23 1.1
 -4 30 11 10.24 1.13
 -4 30 -11 9.99 1.03
 -4 30 12 -0.31 0.52
 4 30 -12 0.94 0.52
 -4 30 -12 0.23 0.38
 -4 30 13 0.12 0.39
 -4 30 -13 0.37 0.43
 4 30 -13 0.01 0.43
 -4 30 -14 1.36 0.5
 -4 30 14 0.76 0.45
 4 30 -14 0.07 0.37
 -4 30 -15 1.26 0.44
 4 30 -15 1.08 0.37
 -4 32 0 1.55 0.69
 -4 -32 0 0.66 1.34
 -4 32 0 1.53 0.6
 -4 32 1 2.62 0.74
 -4 -32 1 2.68 1.33
 -4 32 -1 3.18 0.72
 -4 32 1 1.45 0.48
 -4 -32 -1 3.02 1.63
 -4 32 -1 3.48 0.84
 -4 -32 2 0.66 1.09
 -4 -32 -2 0.22 1.23
 4 -32 -2 -0.53 1.11
 -4 32 2 0.55 0.48
 -4 32 2 1.03 0.66
 -4 32 3 1.88 0.56
 -4 -32 3 3.68 1.41
 -4 32 3 1.83 0.48
 4 -32 -3 3.36 1.62
 -4 -32 -3 2.32 1.33
 4 -32 -4 0.78 1.11
 -4 32 4 0.17 0.48
 -4 -32 -4 -0.31 0.85
 -4 32 4 -0.02 0.55
 -4 32 5 9.75 1.09
 4 32 5 11.09 1.21
 -4 32 5 9.9 1.1
 4 -32 -5 8.23 2.36
 -4 -32 -5 9.14 2.36
 4 32 6 4.48 0.9
 4 -32 -6 4.62 1.75
 -4 -32 -6 2.86 1.33
 -4 32 6 3.35 0.77
 -4 32 7 34.86 1.94
 4 32 7 37.87 2.08
 -4 32 8 -0.7 0.76
 4 32 8 -0.41 0.61
 -4 32 9 0.55 0.53
 4 32 9 0.42 0.48
 -4 32 -10 0.69 0.43
 4 32 10 0.62 0.46
 -4 32 10 -0.47 0.54
 -4 32 11 -0.11 0.54
 -4 32 -11 0.14 0.37
 4 32 -11 -0.43 0.4
 4 32 -12 -0.11 0.35
 -4 32 -12 0.34 0.36
 -4 32 12 -0.89 0.52
 4 32 -13 3.64 0.62
 -4 32 13 2.45 0.58
 -4 32 -13 3.01 0.56
 -4 32 -14 1.08 0.41
 4 32 -14 0.32 0.28
 -4 -34 0 0.8 1.34
 -4 34 0 2.09 0.81
 -4 34 0 0.94 0.52
 4 -34 -1 42.06 5.28
 -4 34 -1 46.17 2.15
 -4 -34 1 33.43 4.54
 -4 34 1 43.95 2.1
 -4 34 1 45.2 2.34
 -4 -34 -1 41.01 5.05
 -4 34 -1 44.52 2.28
 -4 34 -2 0.87 0.65
 -4 -34 -2 0.82 1.44
 -4 34 -2 1.09 0.62
 -4 34 2 0.19 0.53
 -4 -34 2 1.8 1.42
 4 -34 -2 -1.18 1.35
 -4 34 2 -0.22 0.52
 -4 34 -3 2.35 0.71
 -4 -34 -3 0.45 0.88
 -4 34 3 0.74 0.65
 4 -34 -3 0.76 1.29
 -4 34 3 1.16 0.56
 -4 34 4 0.2 0.47
 -4 34 4 -0.15 0.73
 -4 34 -4 1.13 0.62
 -4 34 5 50.93 2.39
 4 34 5 55.89 2.51
 -4 34 6 4.02 0.85
 4 34 6 5.78 1.13
 -4 34 7 13.93 1.29
 4 34 7 14.4 1.31
 4 34 8 -0.22 0.53
 -4 34 8 0.28 0.53
 4 34 9 1.36 0.53
 -4 34 9 1.96 0.65
 -4 34 10 0.43 0.55
 4 34 10 0.12 0.45
 -4 34 11 4.69 0.8
 -4 34 12 0.55 0.44
 -4 34 13 6.8 0.78
 -4 36 0 1.47 0.61
 -4 36 0 1.27 0.76
 -4 36 1 1.36 0.47
 -4 36 -1 2.5 0.68
 -4 36 1 1.79 0.69
 -4 36 -1 3.19 0.77
 -4 36 -2 0.33 0.52
 -4 36 2 -0.16 0.64
 -4 36 -2 0.89 0.51
 -4 36 2 -0.72 0.68
 -4 36 -3 7.22 0.95
 -4 36 3 6.07 0.85
 -4 36 -3 8.48 1.02
 -4 36 3 6.65 0.96
 -4 36 -4 1.53 0.73
 -4 36 4 0.28 0.56
 4 36 4 2.43 0.89
 -4 36 -4 3.66 0.85
 -4 36 5 28.56 1.82
 4 36 5 32.43 2.03
 -4 36 6 -0.38 0.61
 4 36 6 0.06 0.56
 4 36 7 17.02 1.43
 -4 36 7 16.98 1.44
 -4 36 8 -0.32 0.58
 4 36 8 -0.53 0.6
 -4 36 9 2.82 0.71
 4 36 9 1.7 0.55
 4 36 10 -0.14 0.41
 -4 36 10 0.53 0.45
 -4 36 11 0.78 0.46
 -4 36 12 -0.21 0.39
 -4 38 0 1.03 0.64
 -4 38 0 0.65 0.55
 -4 38 -1 0.72 0.44
 -4 38 -1 0.49 0.51
 -4 38 1 0.07 0.51
 -4 38 1 0.28 0.45
 -4 38 -2 0.34 0.48
 -4 38 -2 0.32 0.44
 -4 38 2 -0.4 0.65
 -4 38 2 -1.07 0.68
 -4 38 -3 15.34 1.31
 -4 38 -3 16.72 1.35
 4 38 3 18.31 1.6
 -4 38 3 14.78 1.37
 -4 38 4 -0.45 0.69
 -4 38 -4 1.25 0.65
 4 38 4 1.99 0.76
 -4 38 5 0.42 0.62
 4 38 5 1.97 0.69
 -4 38 -5 0.86 0.62
 4 38 6 -0.48 0.58
 -4 38 6 -0.19 0.54
 4 38 7 0.84 0.49
 -4 38 7 0.4 0.48
 4 38 8 -0.7 0.55
 -4 38 8 0.03 0.45
 -4 38 9 0.5 0.47
 4 38 9 -0.3 0.52
 -4 38 10 -0.1 0.43
 4 38 10 0.03 0.37
 -4 38 11 -0.06 0.37
 -4 40 0 1.66 0.7
 -4 40 0 1.57 0.58
 -4 40 1 26.91 1.8
 -4 40 -1 26.51 1.76
 -4 40 1 23.93 1.57
 -4 40 -1 24.84 1.6
 -4 40 -2 -0.43 0.48
 4 40 2 0.21 0.61
 -4 40 2 -0.78 0.69
 -4 40 -2 0.14 0.46
 -4 40 3 -0.37 0.61
 4 40 3 0.83 0.65
 -4 40 -3 -0.49 0.46
 -4 40 -3 -0.21 0.45
 -4 40 -4 0.11 0.44
 -4 40 4 0.14 0.53
 4 40 4 0.28 0.56
 4 40 5 -0.52 0.61
 -4 40 5 -0.01 0.62
 -4 40 -5 0.06 0.49
 -4 40 6 0.19 0.55
 4 40 6 -0.37 0.55
 -4 40 -6 0.59 0.57
 4 40 7 3.23 0.68
 -4 40 7 4.1 0.76
 -4 40 -7 3.88 0.71
 -4 40 8 0.2 0.46
 -4 40 -8 0.55 0.54
 4 40 8 -0.25 0.5
 4 40 9 4.76 0.72
 -4 40 -9 6.38 0.81
 -4 40 9 4.78 0.75
 -4 40 10 0.52 0.41
 -4 40 -10 0.09 0.38
 -4 40 -11 5.53 0.67
 -4 42 0 1.99 0.55
 -4 42 0 2.14 0.64
 -4 42 -1 25.19 1.67
 -4 42 1 25 1.69
 -4 42 -1 24.59 1.53
 4 42 1 28.1 1.82
 -4 42 -2 0.41 0.4
 -4 42 -2 0.41 0.44
 -4 42 2 0.65 0.51
 4 42 2 1.2 0.65
 4 42 3 3.5 0.73
 -4 42 3 3.88 0.81
 -4 42 -3 2.35 0.58
 -4 42 -3 3.02 0.62
 -4 42 -4 -0.3 0.48
 -4 42 4 -0.05 0.46
 4 42 4 -0.81 0.65
 -4 42 -5 1.04 0.5
 4 42 5 -0.32 0.54
 -4 42 5 1.11 0.57
 -4 42 -6 0.37 0.4
 4 42 6 -0.23 0.51
 -4 42 6 0.38 0.45
 -4 42 7 12.35 1.14
 4 42 7 13.11 1.15
 -4 42 -7 14.36 1.15
 4 42 8 1.75 0.51
 -4 42 -8 1.89 0.53
 -4 42 8 1.04 0.47
 -4 42 9 12.64 1.06
 -4 42 -9 16.17 1.14
 4 44 0 2.76 0.75
 -4 44 0 1.23 0.58
 4 44 1 19.98 1.49
 -4 44 -1 17.7 1.25
 -4 44 1 20.08 1.46
 4 44 -1 22.13 1.6
 -4 44 -1 18.22 1.38
 -4 44 -2 0.7 0.37
 -4 44 2 0.75 0.45
 4 44 2 0.98 0.47
 -4 44 -2 0.97 0.35
 -4 44 3 4.61 0.76
 4 44 3 3.8 0.72
 -4 44 -3 3.77 0.63
 -4 44 -4 -0.66 0.44
 4 44 4 0.16 0.44
 -4 44 5 1.89 0.62
 4 44 5 0.92 0.47
 -4 44 -5 2.15 0.51
 -4 44 -6 0.69 0.41
 -4 44 6 -0.16 0.42
 4 44 6 -0.07 0.4
 -4 44 7 5.14 0.7
 4 44 7 6.53 0.81
 -4 44 -7 6.04 0.7
 -4 44 8 1.07 0.43
 -4 46 0 1.01 0.49
 4 46 0 1.67 0.55
 -4 46 1 2.61 0.59
 4 46 -1 3.4 0.71
 -4 46 -1 1.25 0.44
 4 46 1 2.24 0.59
 -4 46 2 -0.04 0.37
 4 46 -2 0.47 0.44
 4 46 2 -0.43 0.5
 -4 46 -3 -0.44 0.38
 4 46 3 -0.16 0.47
 4 46 -3 0.23 0.42
 -4 46 3 0.57 0.44
 -4 46 4 -0.1 0.39
 4 46 -4 0.02 0.34
 -4 46 -4 -0.54 0.35
 -4 46 5 0.08 0.37
 4 46 5 -0.59 0.43
 -4 46 6 -0.52 0.41
 4 48 0 -0.22 0.37
 4 48 -1 0.18 0.36
 4 48 1 0.89 0.41
 4 48 2 1.09 0.33
 -5 -1 0 0.3 0.28
 -5 1 0 -0.28 0.31
 -5 -1 -1 69.26 2.16
 -5 -1 1 65.96 1.91
 -5 1 -1 68.48 2.19
 -5 -1 1 68.7 1.7
 -5 1 1 64.24 2.04
 -5 -1 2 8.33 0.8
 -5 1 2 8.65 0.85
 -5 1 -2 8.27 0.9
 -5 -1 -2 8.73 0.93
 -5 -1 -3 909.79 9.36
 -5 1 3 924.77 9.09
 -5 -1 3 919.44 8.88
 -5 1 -3 919.03 9.3
 5 -1 -4 1.93 0.28
 -5 -1 -4 4.36 0.92
 -5 -1 4 3.46 0.88
 -5 1 4 4.03 0.91
 -5 1 -4 3.71 0.85
 -5 1 -5 68.4 3.02
 -5 -1 -5 67.81 3.08
 -5 -1 5 70.86 3.1
 -5 1 5 67.26 3.06
 -5 1 -6 0.09 0.52
 -5 1 6 0.45 0.7
 -5 -1 6 0.7 0.74
 -5 -1 -6 0.42 0.65
 -5 -1 -7 25.54 2.19
 -5 1 -7 26.76 2.21
 -5 -1 8 -0.09 0.3
 -5 1 8 0.05 0.34
 5 -1 8 0.32 0.37
 5 1 8 -0.21 0.36
 -5 -1 -8 0.09 0.57
 -5 1 -8 0.21 0.47
 -5 -1 -9 -0.19 0.32
 -5 -1 -9 0.36 0.61
 -5 1 -9 -0.06 0.28
 -5 1 9 -0.29 0.5
 5 -1 9 0.48 0.42
 -5 1 -9 0.22 0.49
 5 1 9 0.42 0.44
 -5 -1 9 0.31 0.35
 -5 -1 -10 0.31 0.32
 -5 1 -10 0.22 0.36
 -5 -1 -10 -0.04 0.6
 -5 -1 10 -0.25 0.5
 -5 1 -10 -0.32 0.66
 5 1 10 0.56 0.51
 5 -1 10 0.64 0.56
 -5 1 10 -0.23 0.41
 -5 -1 -11 2.61 0.96
 -5 1 -11 3.49 0.63
 -5 -1 -11 2.99 0.55
 -5 -1 11 3.4 0.66
 5 -1 11 4.46 0.82
 -5 1 11 3.09 0.66
 -5 1 -11 2.7 1.03
 5 1 11 4.39 0.84
 -5 1 -12 0.21 0.47
 -5 -1 12 0.24 0.53
 -5 1 12 0.19 0.49
 5 -1 12 0.61 0.67
 -5 -1 -12 0.51 0.46
 -5 -1 -12 -0.46 0.72
 5 1 12 1.78 0.73
 -5 -1 -13 22.22 1.37
 -5 1 13 22.66 1.61
 -5 -1 13 20.8 1.56
 5 -1 13 21.74 1.74
 5 1 13 24.24 1.75
 -5 1 -13 20.83 1.32
 -5 -1 14 1.72 0.75
 5 -1 14 2.02 0.91
 -5 1 -14 0.57 0.47
 -5 -1 -14 1.37 0.57
 -5 1 14 -0.49 0.56
 5 1 14 3.64 0.96
 -5 -1 15 40.09 2.2
 -5 1 15 41.34 2.21
 -5 -1 -15 38.59 1.9
 -5 1 -15 42.53 1.96
 -5 1 -16 0.71 0.45
 -5 1 16 1.13 0.66
 -5 -1 16 0.4 0.65
 -5 1 17 3.84 0.8
 -5 -1 17 3.36 0.74
 -5 -1 18 0.26 0.43
 -5 1 18 1.15 0.54
 -5 -1 19 1.11 0.51
 -5 1 19 0.91 0.49
 -5 -3 0 0.01 0.27
 -5 -3 1 24.58 1.04
 -5 -3 1 24.84 1.09
 -5 -3 -1 25.84 1.42
 -5 -3 -2 0.35 0.43
 -5 3 -2 0.2 0.36
 -5 -3 2 0.51 0.32
 -5 -3 2 0.5 0.18
 -5 3 -3 6.12 0.82
 -5 -3 3 6.85 0.85
 -5 -3 -3 6.23 0.92
 5 -3 -4 14.13 1
 -5 3 -4 13.84 1.33
 -5 -3 4 13.33 1.28
 -5 -3 -4 14.71 1.44
 -5 3 4 12.55 1.34
 -5 -3 -5 175.91 5.01
 -5 3 5 174.92 4.93
 -5 -3 5 180.49 4.83
 -5 3 -5 175.97 4.76
 5 -3 -6 0.04 0.2
 -5 3 -6 0.25 0.51
 -5 -3 -6 0.55 0.66
 -5 3 6 0.96 0.73
 -5 3 -7 0.88 0.58
 -5 -3 -7 0.54 0.54
 -5 3 7 1.76 0.94
 -5 3 -8 0.25 0.3
 -5 -3 8 0.5 0.37
 -5 -3 -8 -0.02 0.65
 -5 3 -8 -0.12 0.59
 5 3 8 0.25 0.41
 5 -3 8 0.15 0.39
 -5 3 -9 15.32 1.01
 -5 -3 -9 13.99 0.88
 -5 -3 -9 16.03 1.99
 -5 -3 9 14.6 1.05
 5 3 9 16.1 1.19
 -5 3 9 16.04 1.11
 -5 3 9 15.23 1.07
 -5 3 -9 15.74 1.95
 5 -3 9 15.88 1.22
 5 -3 10 0.5 0.56
 -5 -3 10 0.13 0.41
 -5 -3 -10 -0.06 0.56
 -5 -3 -10 0.41 0.31
 5 3 10 0.45 0.55
 -5 3 10 0.1 0.41
 -5 3 -10 0.34 0.41
 -5 3 11 0.9 0.54
 -5 -3 11 0.78 0.42
 -5 -3 -11 0.81 0.65
 -5 -3 -11 1.22 0.39
 -5 3 -11 1.31 0.45
 5 3 11 1.5 0.64
 5 -3 11 2.22 0.73
 -5 3 12 0.32 0.51
 -5 -3 12 -0.12 0.5
 -5 -3 -12 -0.92 0.94
 -5 3 -12 -0.18 0.38
 -5 -3 -12 0.17 0.35
 5 -3 12 0.73 0.71
 5 3 12 0.46 0.71
 -5 3 -13 10.54 1.01
 -5 -3 13 9.91 1.17
 -5 3 13 11.31 1.21
 5 -3 13 10.52 1.31
 5 3 13 10.73 1.31
 -5 -3 -13 10.15 0.94
 -5 3 -14 0.91 0.48
 -5 -3 14 1.55 0.8
 5 -3 14 0.84 0.78
 5 -3 15 14.81 1.51
 -5 -3 15 13.07 1.31
 -5 3 15 13.08 1.31
 -5 3 -15 13.29 1.13
 -5 3 -16 1.12 0.52
 -5 3 16 0.53 0.58
 -5 -3 16 0.1 0.71
 -5 3 -17 4.14 0.66
 -5 3 17 3.19 0.74
 -5 -3 17 2.59 0.69
 -5 -3 18 -0.02 0.43
 5 3 -18 -0.32 0.34
 -5 3 18 0.68 0.53
 -5 3 19 3.91 0.66
 -5 -3 19 3.13 0.64
 -5 -5 0 -0.02 0.32
 -5 -5 1 276.05 3.29
 -5 -5 -1 272.53 4.86
 -5 -5 1 267.32 3.88
 -5 -5 2 0.08 0.18
 -5 -5 2 0.07 0.31
 -5 -5 -2 0.32 0.41
 -5 -5 3 113.97 2.94
 -5 -5 -3 114.06 3.62
 -5 -5 -4 0.17 0.5
 -5 5 4 0.93 0.58
 -5 -5 4 0.91 0.59
 5 -5 -5 9.94 1.08
 -5 5 5 9.81 1.23
 -5 5 -5 10.26 1.19
 -5 -5 -5 10.03 1.31
 -5 5 6 6.61 1.22
 5 -5 -6 6.5 0.87
 -5 5 -6 6.69 1.1
 -5 -5 -6 7.31 1.22
 -5 -5 -7 0.61 0.56
 -5 5 7 1.05 0.87
 -5 -5 -8 2.71 0.95
 -5 -5 8 2.79 0.56
 -5 5 -8 2.75 0.5
 -5 5 8 3.07 0.59
 5 5 8 2.96 0.64
 5 -5 8 3.83 0.67
 -5 5 -9 65.27 2.05
 -5 5 9 70.59 2.23
 -5 5 9 69.73 2.3
 -5 -5 -9 73.76 4.32
 5 5 9 68.74 2.37
 5 -5 9 65 2.37
 -5 -5 9 68.36 2.26
 -5 5 10 2.74 0.61
 -5 5 -10 2.11 0.51
 -5 5 10 2.75 0.62
 -5 -5 -10 1.96 1.04
 5 5 10 2.26 0.64
 -5 -5 10 1.8 0.46
 5 -5 10 2.54 0.68
 -5 5 11 35.35 1.71
 -5 -5 -11 36.68 3.39
 -5 5 11 36.04 1.85
 -5 5 -11 34.63 1.65
 5 5 11 37.56 1.96
 5 -5 11 35.49 1.99
 -5 -5 11 33.4 1.77
 -5 5 12 0.55 0.56
 -5 5 -12 0.45 0.47
 5 5 12 0.85 0.73
 5 -5 12 0.83 0.66
 -5 -5 12 -0.23 0.51
 -5 -5 -12 0.45 0.73
 -5 -5 13 0.57 0.63
 -5 5 -13 0.41 0.45
 5 -5 13 0.71 0.63
 -5 5 13 -0.7 0.54
 -5 -5 14 0.39 0.64
 -5 5 -14 0.26 0.43
 5 -5 14 0.75 0.72
 5 -5 15 6.63 1.07
 -5 5 15 8.13 1.01
 -5 -5 15 7.33 0.99
 -5 5 -15 7.7 0.89
 -5 -5 16 0.99 0.65
 -5 5 16 -0.39 0.61
 -5 5 -16 0.47 0.44
 -5 5 -17 -0.05 0.44
 -5 -5 17 -0.46 0.63
 -5 5 17 0.5 0.55
 5 5 -18 -0.36 0.39
 -5 5 -18 0.79 0.4
 -5 5 18 1.56 0.66
 -5 -5 18 0.61 0.51
 -5 -5 19 9.46 0.93
 -5 -7 0 26.94 1.61
 -5 -7 -1 30.53 1.86
 -5 -7 1 28.78 1.54
 -5 -7 1 28.52 0.96
 -5 -7 2 0.2 0.25
 -5 -7 -2 0.19 0.52
 -5 -7 2 0.14 0.27
 -5 -7 -3 48.37 2.48
 -5 -7 3 41.32 1.37
 -5 7 4 5.28 0.92
 -5 -7 -4 4.28 0.93
 -5 7 5 32.95 2.25
 -5 -7 -5 34.8 2.4
 5 -7 -5 35.15 2.17
 -5 7 6 0.59 0.58
 5 -7 -6 0.63 0.43
 -5 -7 -6 0.66 0.61
 -5 7 7 2.9 0.91
 5 -7 -7 2.2 0.67
 -5 -7 -7 3.29 0.91
 -5 -7 -8 4.07 1.09
 -5 -7 8 3.37 0.56
 -5 7 8 4.51 0.68
 -5 7 -8 3.68 0.56
 -5 7 8 3.53 1.24
 5 7 8 3.64 0.7
 5 -7 8 3.4 0.65
 -5 7 -9 133.76 2.93
 -5 -7 -9 146.4 6.13
 -5 7 9 132.75 3.14
 -5 7 9 136.88 3.12
 -5 -7 9 134.49 3.17
 5 7 9 141.53 3.38
 5 -7 9 146.81 3.55
 -5 7 -10 12.97 1.07
 -5 -7 -10 13.58 2.1
 -5 7 10 14.13 1.16
 -5 -7 10 12.59 1.16
 5 7 10 13.99 1.33
 5 -7 10 11.21 1.17
 -5 7 10 12.98 1.11
 -5 7 -11 51.49 2.01
 -5 -7 11 53.77 2.26
 -5 7 11 52.29 2.06
 5 -7 11 54.37 2.38
 5 7 11 55.35 2.4
 -5 -7 -11 53.63 4.21
 -5 7 11 56.28 2.31
 -5 -7 12 4.79 0.89
 -5 -7 -12 4.69 1.38
 -5 7 -12 5 0.79
 5 -7 12 6.04 1.02
 -5 7 12 6.01 0.95
 -5 -7 13 1.1 0.64
 -5 7 -13 0.93 0.48
 5 -7 13 0.84 0.7
 -5 7 13 -0.67 0.73
 -5 7 -14 -0.44 0.52
 -5 -7 14 0.72 0.71
 5 -7 14 0.07 0.7
 -5 7 14 -1.38 0.86
 -5 7 15 5.83 0.93
 -5 7 -15 6.6 0.83
 5 -7 15 7.97 1.2
 -5 -7 15 5.01 0.81
 -5 7 16 0.54 0.53
 -5 7 -16 -0.28 0.49
 -5 -7 16 0.1 0.61
 -5 7 17 14.97 1.33
 -5 -7 17 12.09 1.25
 -5 7 -17 15.22 1.19
 -5 7 -18 1.32 0.45
 5 7 -18 1.04 0.48
 -5 -7 18 1.2 0.57
 -5 -7 19 16.55 1.21
 -5 -9 0 24.59 1.7
 -5 9 1 148.92 3.78
 -5 -9 -1 153.64 4.32
 -5 -9 1 149 3.85
 -5 -9 2 15.61 1.2
 -5 9 2 14.73 1.28
 -5 -9 -2 14.94 1.48
 -5 9 3 45.5 2.3
 -5 -9 -3 45.49 2.65
 -5 -9 3 47.98 1.92
 -5 -9 -4 2.66 0.87
 -5 9 4 3.27 0.79
 -5 -9 4 3.2 0.48
 -5 9 5 1.38 0.76
 5 -9 -5 1.4 0.64
 -5 -9 -5 1.21 0.69
 5 -9 -6 1.88 0.73
 -5 9 6 1.98 0.85
 -5 -9 -6 1.22 0.73
 -5 9 -7 0.41 0.33
 -5 -9 7 0.24 0.36
 -5 -9 -7 0.47 0.72
 5 -9 -7 -0.14 0.57
 -5 9 7 0.45 0.71
 -5 9 8 0.93 0.48
 -5 -9 8 0.26 0.38
 -5 9 -8 0.71 0.37
 -5 9 8 0.83 0.9
 -5 -9 -8 0.13 0.63
 5 -9 8 0.26 0.38
 -5 -9 -9 85.39 4.81
 -5 9 -9 79.37 2.32
 -5 9 9 82.02 2.46
 5 -9 9 90.94 2.81
 -5 9 9 74.43 2.37
 -5 -9 9 79.91 2.55
 -5 9 -10 26.2 1.45
 -5 -9 -10 27 2.96
 -5 9 10 24.69 1.51
 -5 9 10 26.73 1.5
 -5 -9 10 25.74 1.61
 5 -9 10 25.3 1.69
 -5 -9 -11 113.21 6.15
 -5 9 11 126.63 3.44
 -5 9 -11 116.72 3.03
 5 -9 11 120.42 3.55
 -5 9 11 112.02 3.07
 -5 -9 11 117.5 3.33
 -5 -9 12 4.2 0.88
 -5 -9 -12 4.34 1.41
 -5 9 12 3.3 0.67
 5 -9 12 5.33 1.05
 -5 9 -12 3.74 0.72
 -5 9 12 4.74 0.84
 -5 9 -13 1.91 0.61
 -5 9 13 -0.05 0.58
 5 -9 13 2.13 0.84
 -5 -9 13 0.96 0.66
 -5 9 -14 1.41 0.56
 -5 -9 14 3.01 0.87
 -5 9 14 0.43 0.52
 5 -9 14 2.07 0.89
 -5 9 -15 -1.06 0.62
 -5 -9 15 -1.7 0.94
 5 -9 15 0.37 0.69
 -5 9 15 0.26 0.49
 -5 9 -16 0.6 0.45
 -5 -9 16 -0.39 0.65
 -5 9 16 0.81 0.56
 -5 9 17 5.12 0.83
 -5 9 -17 4.37 0.7
 -5 -9 17 3.18 0.76
 -5 -9 18 2.35 0.66
 -5 9 -18 2.83 0.59
 5 9 -18 3.78 0.67
 -5 -9 19 13.24 1.07
 -5 -11 0 36.65 2.23
 -5 -11 -1 66.99 3.09
 -5 -11 1 67.04 2.9
 -5 11 1 62.14 2.62
 -5 -11 2 11.25 1.17
 -5 -11 -2 10.45 1.39
 -5 11 2 11.8 1.23
 -5 11 3 13.71 1.34
 -5 -11 3 13.55 1.19
 -5 -11 -3 13.32 1.59
 -5 11 4 -0.07 0.49
 -5 -11 -4 -0.14 0.59
 -5 -11 4 0.22 0.3
 -5 -11 5 0.46 0.28
 -5 -11 -5 0.76 0.72
 5 -11 -5 0.58 0.48
 -5 11 5 1.64 0.7
 5 -11 -6 22.45 2.22
 -5 11 6 22.63 2.09
 -5 -11 -6 22.38 2.27
 -5 11 7 1.37 0.52
 -5 -11 -7 1.16 0.88
 -5 -11 7 1.4 0.43
 -5 11 7 0.89 0.71
 5 -11 -7 1.06 0.76
 -5 11 -7 1.02 0.37
 -5 11 7 0.78 0.35
 -5 11 8 7.57 0.85
 -5 -11 8 7.07 0.84
 -5 11 -8 7.77 0.76
 5 -11 8 7.58 0.88
 -5 -11 -8 8.28 1.6
 -5 11 8 7.37 0.89
 -5 11 8 8.53 1.55
 -5 -11 -9 60.74 4.27
 -5 11 -9 58.38 2.02
 -5 -11 9 62.25 2.28
 -5 11 9 60.87 2.14
 5 -11 9 55.01 2.32
 -5 11 -10 21.52 1.32
 -5 -11 -10 21.14 2.64
 -5 11 10 20.92 1.36
 -5 -11 10 21.8 1.52
 5 -11 10 20.75 1.53
 -5 11 10 18.91 1.32
 -5 11 -11 43.65 1.93
 -5 -11 -11 44.11 3.97
 -5 11 11 41.37 1.95
 -5 11 11 45.58 2.13
 5 -11 11 44.56 2.28
 -5 -11 11 46.13 2.17
 -5 -11 12 5.2 0.94
 -5 11 -12 3.78 0.72
 -5 11 12 3.64 0.71
 -5 11 12 3.86 0.74
 5 -11 12 5.89 1.06
 -5 -11 -12 2.44 1.11
 -5 -11 13 7.16 1.05
 -5 11 -13 7.42 0.91
 -5 11 13 7.6 1.01
 5 -11 13 7.09 1.17
 -5 11 13 6.14 0.92
 -5 11 -14 -0.41 0.53
 5 -11 14 0.78 0.73
 -5 -11 14 0.14 0.62
 -5 11 14 -0.12 0.49
 -5 11 -15 0.54 0.47
 -5 11 15 2.09 0.59
 5 -11 15 1.93 0.84
 -5 11 -16 0.27 0.48
 -5 11 16 1.08 0.58
 -5 -11 16 -0.39 0.68
 -5 -11 17 7.17 1.02
 -5 11 -17 9.49 0.99
 5 11 -18 1.31 0.5
 -5 11 -18 1.49 0.43
 -5 -11 18 1.78 0.6
 -5 -11 19 6.55 0.8
 -5 -13 0 35.4 2.43
 -5 13 0 34.89 2.1
 -5 -13 1 68.99 3.18
 -5 13 1 71.61 2.92
 -5 -13 -1 70.46 3.42
 -5 -13 -2 1.1 0.68
 -5 -13 2 1.28 0.55
 -5 13 2 0.67 0.44
 -5 -13 3 11.64 1.25
 -5 -13 -3 12.17 1.62
 -5 13 3 10.93 1.24
 -5 -13 -4 0.92 0.73
 -5 13 4 1.02 0.62
 -5 -13 4 0.84 0.38
 -5 -13 5 163.34 4.15
 5 -13 -5 172.82 5.91
 -5 -13 -5 183.68 6.29
 -5 13 5 178.45 5.41
 -5 13 -6 36.74 1.48
 -5 13 6 35.56 2.69
 -5 13 6 35.28 1.48
 5 -13 -6 34.7 2.91
 -5 -13 -6 38.75 3.02
 -5 13 7 8 0.78
 -5 13 -7 7.88 0.76
 -5 -13 7 8.06 0.81
 -5 13 7 7.44 0.84
 -5 -13 -7 8.6 1.62
 5 -13 -7 7.21 1.49
 -5 13 7 7.23 1.48
 -5 13 -8 4.56 0.64
 -5 -13 8 2.74 0.6
 -5 13 8 2.77 0.63
 5 -13 8 2.08 0.54
 -5 13 8 3.71 1.35
 -5 -13 -8 2.6 0.9
 -5 13 8 2.83 0.56
 5 -13 -8 2.12 0.84
 -5 13 -9 52.18 1.97
 -5 -13 9 54.36 2.24
 -5 13 9 52.58 2.06
 5 -13 9 47.34 2.11
 -5 -13 -9 54.61 4.12
 5 -13 10 4.79 0.88
 -5 -13 -10 4.64 1.44
 -5 -13 10 4.45 0.77
 -5 13 -10 5.38 0.79
 -5 13 10 6.37 0.88
 -5 -13 11 1.7 0.65
 -5 13 -11 2.19 0.6
 -5 13 11 0.99 0.49
 5 -13 11 3.22 0.79
 -5 -13 -11 1.89 1.2
 -5 13 -12 0.31 0.6
 -5 13 12 0.55 0.53
 -5 -13 12 -0.23 0.57
 -5 -13 -12 0.39 0.82
 5 -13 12 0.72 0.68
 -5 -13 13 3.79 0.96
 5 -13 13 5.51 1.07
 -5 13 -13 3.46 0.76
 -5 13 13 3.97 0.74
 -5 -13 14 2.72 0.8
 -5 13 -14 3.36 0.69
 5 -13 14 3.75 1.01
 -5 -13 15 8.66 1.1
 -5 13 -15 9.98 1.06
 -5 13 -16 2.21 0.6
 -5 -13 16 0.66 0.57
 -5 13 -17 -0.25 0.44
 -5 -13 17 -0.36 0.5
 5 13 -18 1.03 0.43
 -5 13 -18 1.33 0.44
 -5 -13 18 1.27 0.54
 -5 -15 0 28.5 2.35
 -5 15 0 28.7 2
 -5 -15 1 0.66 0.48
 -5 15 1 1.57 0.63
 -5 -15 -1 0.36 0.63
 -5 -15 2 2.6 0.79
 -5 -15 -2 3.14 1.02
 -5 15 2 2.37 0.73
 -5 -15 -3 26.22 2.41
 -5 15 3 22.56 1.92
 -5 -15 3 23.95 1.94
 -5 -15 4 147.34 4.66
 -5 -15 -4 151.56 5.78
 -5 15 4 143.91 4.84
 5 -15 -5 95.96 4.64
 -5 -15 5 93.32 3.59
 -5 -15 -5 103.91 4.98
 -5 15 5 93.88 4.12
 -5 15 5 91.61 2.27
 -5 -15 6 43.44 1.79
 -5 15 -6 45.74 1.73
 -5 15 6 45.52 1.69
 -5 15 6 45.92 3.04
 5 -15 -6 44.75 3.43
 -5 15 6 45.6 1.82
 -5 -15 -6 50.01 3.63
 -5 15 -7 38.31 1.61
 5 -15 -7 37.81 3.35
 -5 -15 7 37.13 1.73
 -5 15 7 36.12 1.61
 -5 15 7 36.73 2.95
 -5 -15 -7 36.89 3.25
 -5 15 7 36.2 1.71
 -5 15 -8 0.2 0.39
 -5 -15 8 0.03 0.42
 -5 15 8 0.84 0.96
 -5 -15 -8 -0.5 0.61
 -5 15 8 0.32 0.37
 -5 15 8 0.48 0.55
 5 -15 -8 0.24 0.65
 5 -15 8 0.23 0.35
 -5 -15 9 4.15 0.74
 -5 15 9 4.17 0.7
 -5 15 -9 4.48 0.72
 -5 -15 -9 4.02 1.24
 5 -15 9 2.96 0.65
 -5 -15 10 0.94 0.53
 -5 15 -10 1.46 0.57
 -5 -15 -10 1.58 0.88
 -5 15 10 2.2 0.76
 5 -15 10 0.92 0.61
 -5 -15 11 2.48 0.7
 -5 15 11 1.31 0.58
 -5 15 -11 2.51 0.68
 -5 -15 -11 0.51 0.75
 5 -15 11 2.77 0.76
 -5 15 12 1.35 0.54
 -5 -15 12 2.33 0.79
 -5 15 -12 1.66 0.63
 -5 -15 -12 0.31 0.73
 5 -15 12 2.43 0.82
 -5 15 13 20.04 1.45
 -5 15 -13 24.01 1.57
 -5 -15 13 23.81 1.79
 5 -15 13 22.37 1.8
 -5 15 -14 13.91 1.27
 5 -15 14 12.94 1.44
 -5 -15 14 12.93 1.44
 -5 -15 15 17.14 1.54
 -5 15 -15 17.71 1.38
 -5 -15 16 7.56 1.07
 -5 15 -16 7.68 0.95
 -5 15 -17 1.72 0.54
 -5 -15 17 1.25 0.57
 5 15 -17 2.27 0.61
 -5 15 -18 0.34 0.38
 -5 -15 18 1.06 0.51
 -5 -17 0 4.36 1.08
 -5 17 0 4.15 0.9
 -5 -17 -1 0.96 0.8
 -5 -17 1 0.29 0.6
 -5 17 1 0.49 0.54
 -5 -17 -2 5.51 1.26
 -5 -17 2 5.8 1.14
 -5 17 2 4.91 0.93
 -5 -17 3 202.23 6.14
 -5 -17 -3 203.04 6.98
 -5 17 3 196.87 5.58
 -5 -17 4 90.64 4.05
 -5 -17 -4 92.51 4.86
 -5 17 4 88.11 3.93
 -5 17 4 81.85 2.2
 5 -17 -5 127.85 5.69
 -5 -17 5 123.22 4.62
 -5 17 -5 120.63 2.69
 -5 17 5 126.71 2.78
 -5 17 5 124.49 2.96
 -5 17 5 129.13 4.99
 -5 -17 -5 128.62 5.85
 5 -17 -6 68.81 4.37
 -5 17 6 65.51 2.12
 -5 17 6 68.67 2.31
 -5 17 6 68.31 3.87
 -5 17 -6 69.83 2.14
 -5 -17 -6 71.18 4.51
 -5 -17 6 62.02 2.22
 -5 -17 -7 28.9 2.99
 -5 17 -7 28.47 1.44
 -5 17 7 29.04 1.58
 -5 17 7 28.53 1.47
 -5 -17 7 29.45 1.58
 5 -17 -7 30.18 3.08
 -5 17 7 27.06 2.64
 -5 17 -8 5.48 0.76
 -5 -17 8 4.47 0.75
 -5 17 8 5.13 0.8
 -5 -17 -8 4.58 1.33
 -5 17 8 4.78 0.67
 -5 17 8 5.57 1.49
 5 -17 -8 5.18 1.46
 -5 17 9 1.06 0.66
 -5 -17 9 -0.17 0.65
 -5 -17 -9 -0.58 0.98
 -5 17 9 -0.02 0.41
 -5 17 -9 0.18 0.39
 -5 -17 10 -0.34 0.57
 -5 17 -10 0.36 0.47
 -5 -17 -10 0.26 0.64
 -5 17 10 0.82 0.52
 5 -17 10 0.94 0.55
 -5 17 -11 1.58 0.61
 -5 -17 -11 1.07 0.83
 5 -17 11 1.01 0.59
 -5 -17 11 1.12 0.61
 -5 17 11 2.13 0.71
 -5 -17 12 10.92 1.28
 -5 -17 -12 8.11 1.91
 -5 17 -12 10.76 1.12
 -5 17 12 9.86 1.1
 5 -17 12 10.14 1.28
 -5 17 -13 16.08 1.35
 -5 17 13 14.25 1.27
 -5 -17 13 16.16 1.55
 5 -17 13 16.53 1.52
 -5 17 -14 20.41 1.49
 -5 17 14 19.14 1.46
 -5 -17 14 21.25 1.8
 -5 -17 15 36.47 2.18
 -5 17 -15 39.05 1.98
 -5 -17 16 13.3 1.32
 -5 17 -16 15.91 1.27
 5 17 -17 5.08 0.8
 -5 17 -17 6.29 0.81
 -5 -17 17 3.61 0.73
 5 17 -18 0.39 0.37
 -5 17 -18 1.05 0.45
 -5 -17 18 1.1 0.55
 -5 -19 0 37.7 3.05
 -5 19 0 37.74 2.5
 -5 -19 -1 0.02 0.68
 -5 -19 1 0.77 0.67
 -5 19 1 0.51 0.48
 -5 -19 2 37.93 2.97
 -5 -19 -2 40.76 3.29
 -5 19 2 33.76 1.46
 -5 19 2 36.11 2.47
 -5 -19 3 62.9 3.75
 -5 -19 -3 63.13 4.14
 -5 19 3 56.46 1.92
 -5 19 3 58.4 3.26
 -5 19 3 58.02 1.9
 -5 -19 4 80.91 4.15
 -5 19 4 78.35 3.89
 -5 19 4 74.31 2.28
 -5 -19 -4 77.49 4.71
 -5 19 4 74.94 2.23
 -5 -19 5 60.39 2.14
 -5 19 5 69.58 3.78
 5 -19 -5 67.86 4.44
 -5 -19 -5 73.33 4.62
 -5 19 -5 65.26 2.03
 -5 19 5 67.19 2.31
 -5 19 5 69.21 2.18
 -5 -19 6 48.76 2.03
 5 -19 -6 54.3 4.14
 -5 19 -6 56.45 1.98
 -5 19 6 53.48 3.53
 -5 19 6 55.16 2.16
 -5 19 6 56.06 2
 -5 -19 -6 58.94 4.29
 -5 -19 7 33.37 1.73
 -5 19 -7 34.59 1.62
 -5 19 7 32.94 1.75
 5 -19 -7 31.98 3.39
 5 19 7 28.33 1.5
 -5 -19 -7 32.05 3.31
 -5 19 7 30.43 2.86
 -5 19 7 33.06 1.62
 -5 19 -8 0.9 0.45
 -5 -19 -8 0.78 0.77
 -5 19 8 1.45 0.98
 -5 -19 8 1.1 0.57
 -5 19 8 1.46 0.6
 -5 19 8 0.36 0.47
 5 -19 -8 1.15 0.88
 -5 19 9 0.64 0.49
 -5 -19 9 0.98 0.53
 -5 19 -9 1.32 0.5
 -5 -19 -9 1.51 1
 -5 19 9 2.66 0.76
 -5 -19 -10 0.56 0.98
 -5 19 -10 0.34 0.51
 -5 -19 10 -0.45 0.61
 -5 19 10 0.67 0.54
 -5 -19 -11 0.87 0.81
 -5 19 -11 2.32 0.63
 -5 19 11 3.43 0.78
 -5 -19 11 2.7 0.78
 -5 19 -12 2.11 0.61
 -5 -19 -12 1.12 0.89
 -5 19 12 1.91 0.63
 -5 -19 12 2.04 0.77
 -5 19 -13 8.84 1.02
 -5 19 13 7.81 1.02
 -5 -19 13 9.24 1.2
 5 -19 13 8.71 1.14
 -5 19 14 17.9 1.39
 -5 19 -14 18.36 1.37
 -5 -19 14 18.26 1.6
 -5 -19 15 20.95 1.69
 -5 19 -15 22.42 1.53
 -5 19 -16 14.77 1.23
 -5 -19 16 11.76 1.27
 5 19 -17 3.03 0.63
 -5 19 -17 3.99 0.69
 -5 -19 17 3.43 0.71
 5 19 -18 -0.05 0.33
 -5 -21 0 108.82 5.44
 -5 21 0 104.72 4.3
 -5 -21 -1 9.64 1.83
 -5 21 1 8.49 1.3
 -5 21 1 7.49 0.76
 -5 -21 1 7.67 1.54
 -5 21 1 8.24 0.75
 -5 21 -1 8.38 1.25
 -5 21 -2 2.24 0.78
 -5 21 2 2.19 0.48
 -5 -21 -2 2.68 1.15
 -5 21 2 2.19 0.48
 -5 -21 2 2.79 0.96
 -5 21 2 2.33 0.68
 -5 -21 3 16.01 2.08
 -5 -21 -3 15.45 2.2
 -5 21 3 14.56 1.02
 -5 21 3 15.13 1.07
 -5 21 3 14.1 1.75
 -5 -21 4 51.65 3.61
 -5 21 4 52.55 1.98
 -5 21 4 48.51 3.19
 -5 -21 -4 52.27 4.09
 -5 21 -4 41.02 1.58
 -5 21 4 51.32 1.92
 -5 21 5 21.34 1.34
 -5 21 -5 19.97 1.16
 5 -21 -5 18.14 2.45
 -5 21 5 21.08 2.24
 -5 -21 -5 21.33 2.69
 -5 21 5 22.09 1.31
 -5 21 -6 14.43 1.07
 5 -21 -6 12.9 2.22
 -5 21 6 15.32 1.21
 -5 21 6 15.55 1.12
 -5 21 6 14.31 1.95
 -5 -21 -6 14.68 2.37
 5 21 7 1 0.49
 -5 -21 7 0.44 0.45
 -5 -21 -7 1.01 1.02
 -5 21 -7 0.28 0.37
 -5 21 7 0.16 0.53
 5 -21 -7 0.94 0.9
 -5 21 7 1.02 0.92
 -5 21 7 0.93 0.54
 -5 21 8 1.81 1.22
 -5 21 8 0.9 0.47
 -5 21 -8 1.35 0.48
 -5 -21 -8 0.21 0.78
 -5 21 8 1.65 0.63
 5 21 8 0.98 0.43
 5 -21 -8 1.12 0.83
 -5 -21 8 0.66 0.46
 -5 -21 9 0.35 0.53
 -5 21 9 1 0.56
 -5 21 -9 0.54 0.49
 -5 -21 -9 0.41 0.77
 -5 21 9 1.92 0.67
 -5 21 -10 7.54 0.97
 -5 21 10 7.55 0.97
 -5 -21 -10 7.64 1.92
 -5 -21 10 7.78 1.08
 -5 21 -11 3.44 0.72
 -5 -21 -11 3.08 1.34
 -5 21 11 3.59 0.83
 -5 -21 11 3.79 0.86
 -5 -21 12 0.7 0.6
 -5 21 -12 -0.04 0.47
 -5 21 12 -0.17 0.58
 -5 21 13 0.52 0.51
 -5 21 -13 1 0.53
 -5 -21 13 1.49 0.69
 -5 21 14 13.62 1.23
 -5 -21 14 12.48 1.31
 -5 21 -14 13.97 1.24
 -5 21 -15 5.27 0.81
 -5 -21 15 6.03 0.96
 -5 21 -16 4.95 0.75
 -5 -21 16 3.14 0.69
 5 21 -16 5.28 0.86
 -5 21 -17 1.66 0.61
 5 21 -17 1.31 0.48
 -5 -21 17 0.99 0.47
 -5 23 0 99.06 4.37
 -5 -23 0 104.53 5.7
 -5 23 0 95.42 2.61
 -5 23 0 92.6 2.47
 -5 -23 1 63.92 4.42
 -5 23 1 61.58 2.11
 -5 23 -1 60.72 3.44
 -5 -23 -1 62.78 4.6
 -5 23 1 64.4 2.08
 -5 23 1 58.44 3.42
 -5 -23 2 16.21 2.31
 -5 -23 -2 15.47 2.33
 -5 23 2 14.54 1.1
 -5 23 2 14.88 1.05
 -5 23 -2 15.49 1.78
 -5 23 2 15.46 1.82
 -5 23 3 4.18 0.61
 -5 -23 3 3.55 1.15
 -5 23 -3 4.3 1.01
 -5 -23 -3 4.69 1.48
 -5 23 3 4.29 0.68
 -5 23 3 4.21 1.07
 -5 23 4 13.38 1.06
 -5 23 4 12.74 1.04
 -5 23 4 12.94 1.76
 -5 -23 -4 13.05 2.23
 -5 -23 4 13.2 2.03
 -5 23 -4 10.7 0.83
 5 -23 -5 11.83 2.19
 -5 -23 -5 11.47 2.14
 -5 23 5 12.88 1.1
 -5 23 5 12.25 1.79
 -5 23 5 12.18 1.07
 -5 23 -5 11.47 0.92
 -5 23 6 0.8 0.49
 5 -23 -6 0.93 0.78
 -5 -23 -6 0.98 0.82
 -5 23 -6 0.21 0.35
 -5 23 6 0.71 0.49
 -5 23 6 0.29 0.6
 -5 -23 -7 1.06 0.81
 -5 23 -7 1.33 0.45
 -5 23 7 0.65 0.51
 -5 23 7 1.89 1.08
 -5 23 7 2.18 0.77
 5 -23 -7 1.38 1.03
 5 23 7 1.53 0.52
 -5 23 -8 17.93 1.26
 5 -23 -8 13.99 2.71
 -5 23 8 17.66 1.33
 5 23 8 15.91 1.23
 -5 -23 -8 15.62 2.55
 -5 23 8 16.02 1.29
 -5 23 9 8.66 1.07
 -5 23 -9 7.78 0.92
 -5 -23 9 9.89 1.17
 -5 -23 -9 7.61 1.86
 -5 23 9 9.39 1.08
 -5 23 -10 26.68 1.65
 -5 23 10 30.07 1.83
 -5 -23 10 28.94 1.91
 -5 23 -11 16.77 1.35
 -5 23 11 16.77 1.45
 -5 -23 11 16.31 1.53
 -5 23 -12 4.56 0.81
 -5 23 12 3.94 0.77
 -5 -23 12 4.04 0.86
 -5 23 13 -0.08 0.54
 -5 23 -13 -0.87 0.62
 -5 -23 13 -1.25 0.75
 -5 23 -14 -0.73 0.59
 -5 23 14 0.2 0.49
 -5 23 -15 0.95 0.41
 -5 -23 15 0.81 0.56
 -5 23 -16 0.09 0.36
 -5 -23 16 0.34 0.39
 5 23 -16 -0.19 0.41
 5 23 -17 0.23 0.34
 -5 23 -17 -0.49 0.34
 -5 -25 0 235.38 9.16
 -5 25 0 226.57 6.9
 -5 25 0 219.72 3.91
 -5 25 0 224.08 4.18
 -5 25 1 24.78 1.41
 -5 25 1 25.72 1.49
 -5 -25 -1 25.82 3.15
 -5 -25 1 23.57 2.96
 -5 25 -1 23.87 2.29
 -5 25 1 23.59 2.33
 -5 -25 -2 52.13 4.43
 -5 25 2 51.41 3.4
 -5 25 2 51.39 2.03
 -5 25 -2 48.92 3.23
 -5 25 2 49.53 1.97
 -5 -25 2 49.85 4.16
 -5 25 -3 3.07 0.94
 -5 25 3 3.61 1.04
 -5 25 3 3.97 0.72
 -5 -25 3 4.7 1.4
 -5 -25 -3 3.63 1.34
 -5 25 3 3.42 0.6
 -5 25 4 1.07 0.48
 -5 25 -4 0.98 0.57
 5 -25 -4 0.5 0.78
 -5 25 4 1.1 0.43
 -5 -25 4 1.68 1.04
 -5 25 4 0.98 0.71
 -5 -25 -4 1.54 1.03
 -5 25 -5 0.3 0.36
 5 -25 -5 0.44 0.86
 -5 25 5 0.12 0.5
 -5 25 5 0.3 0.64
 -5 25 5 1.05 0.51
 -5 -25 -5 -0.09 0.88
 -5 -25 -6 0.21 0.72
 -5 25 -6 0.76 0.36
 5 25 6 1.7 0.59
 5 -25 -6 0.09 0.72
 -5 25 6 0.72 0.8
 -5 25 6 0.72 0.53
 -5 25 6 0.76 0.52
 5 -25 -7 1.79 1.07
 -5 25 7 1.1 0.5
 -5 25 -7 1.62 0.5
 -5 25 7 2.53 1.22
 5 25 7 1.59 0.56
 -5 25 7 1.51 0.67
 -5 -25 -7 1.19 1
 -5 25 8 54.08 2.37
 5 25 8 54.25 2.31
 -5 25 -8 56.82 2.22
 -5 25 8 53.06 2.31
 -5 -25 -8 48.25 4.64
 -5 25 9 25.91 1.69
 -5 25 9 26.61 1.75
 5 25 9 23.52 1.6
 -5 -25 -9 22.27 3.19
 -5 25 -9 25.8 1.61
 -5 25 10 49.94 2.43
 -5 25 -10 47.8 2.11
 -5 25 11 3.53 0.87
 -5 25 -11 3.53 0.72
 -5 25 12 9.89 1.13
 -5 25 -12 9.28 0.99
 -5 25 -13 2.77 0.58
 -5 25 13 2.83 0.63
 -5 25 -14 0.34 0.43
 -5 25 14 1.41 0.55
 -5 25 -15 -0.16 0.47
 5 25 -15 -0.72 0.57
 -5 25 -16 -0.24 0.39
 5 25 -16 -0.55 0.41
 -5 -27 0 101.65 6.5
 -5 27 0 105.52 2.84
 -5 27 0 104.73 3
 -5 27 1 19.51 1.32
 -5 -27 1 19.6 2.91
 -5 -27 -1 19.48 2.91
 -5 27 1 17.45 2.08
 -5 27 1 19.72 1.39
 -5 27 -1 18.55 1.33
 -5 -27 2 35.37 3.68
 -5 -27 -2 34.73 3.87
 -5 27 2 35.27 1.74
 -5 27 2 31.27 2.79
 -5 27 2 36.97 1.83
 -5 -27 -3 0.84 0.89
 -5 -27 3 2 1.12
 -5 27 3 1.44 0.48
 -5 27 3 1.43 0.77
 -5 27 3 2.11 0.58
 -5 27 4 0.66 0.45
 -5 27 4 0.31 0.56
 -5 27 4 0.38 0.54
 5 -27 -4 -0.48 1.26
 -5 -27 -4 0.86 1.04
 5 -27 -5 0.84 0.77
 -5 27 5 2.67 0.68
 -5 27 5 2.32 0.6
 -5 27 5 2.4 1.03
 -5 -27 -5 1.7 1.19
 -5 -27 -6 0.77 0.95
 -5 27 -6 0.2 0.41
 -5 27 6 0.81 0.58
 5 27 6 1.11 0.63
 -5 27 6 1.67 1.09
 5 -27 -6 0.19 0.97
 -5 27 6 0.85 0.54
 -5 -27 -7 -0.21 0.94
 5 -27 -7 -1.42 1.24
 5 27 7 0.27 0.53
 -5 27 7 1.56 0.68
 -5 27 7 -1.24 0.83
 -5 27 -7 -0.16 0.43
 -5 27 8 51.15 2.38
 -5 27 -8 52.84 2.18
 5 27 8 54.18 2.41
 -5 27 8 50.28 2.25
 -5 -27 -8 44.93 4.57
 5 27 9 12.42 1.23
 -5 27 -9 11.75 1.19
 -5 -27 -9 8.76 2.2
 -5 27 9 11.44 1.26
 -5 27 10 51.64 2.47
 -5 27 -10 50.02 2.21
 -5 27 11 10.23 1.15
 -5 27 -11 9.03 1.04
 -5 27 12 6.68 0.96
 -5 27 -12 7.03 0.87
 -5 27 -13 1.14 0.44
 -5 27 13 1.16 0.48
 -5 27 14 0.18 0.4
 -5 27 -14 0.49 0.44
 5 27 -15 -0.16 0.41
 -5 27 -15 0.02 0.36
 5 27 -16 0.73 0.39
 -5 27 -16 0.76 0.37
 -5 -29 0 63.11 5.42
 -5 29 0 61.63 2.31
 -5 29 0 64.12 2.45
 -5 -29 1 5.04 1.88
 -5 -29 -1 4.69 1.73
 -5 29 1 5.1 0.81
 -5 29 1 4.64 0.8
 -5 29 -1 4.81 0.8
 -5 29 -1 4.87 0.83
 -5 29 2 15.44 1.28
 -5 -29 2 13.31 2.52
 -5 -29 -2 14.39 2.7
 -5 29 2 14.22 1.21
 -5 29 -2 14.61 1.22
 5 -29 -3 -0.2 0.96
 -5 29 3 -0.37 0.49
 -5 29 3 0.17 0.46
 -5 -29 -3 0.13 0.91
 -5 -29 3 -0.92 0.85
 5 -29 -4 1.3 0.97
 -5 29 4 0.91 0.52
 -5 29 4 0.47 0.52
 -5 -29 -4 0.92 1.03
 5 -29 -5 -0.45 1
 -5 29 5 0.09 0.5
 -5 29 5 0.52 0.56
 -5 -29 -5 0.44 0.78
 5 -29 -6 6.62 1.96
 -5 29 6 8.27 1.02
 -5 -29 -6 5.75 1.81
 5 29 6 9.09 1.09
 -5 29 6 8.55 1.04
 -5 29 -7 -0.04 0.41
 -5 29 7 0.54 0.58
 -5 -29 -7 -0.33 1.02
 5 29 7 0.42 0.64
 5 -29 -7 -0.97 1.39
 -5 29 7 -1.67 0.81
 5 -29 -8 2.82 1.49
 -5 29 -8 3.94 0.69
 5 29 8 4.11 0.8
 -5 29 8 2.4 0.68
 -5 29 -9 0.24 0.39
 -5 29 9 -0.38 0.59
 5 29 9 0.94 0.58
 -5 29 10 39.17 2.18
 -5 29 -10 37.55 1.87
 -5 29 11 7.4 1.08
 -5 29 -11 6.03 0.88
 -5 29 -12 5.54 0.79
 -5 29 12 4.89 0.83
 5 29 -13 0.44 0.46
 -5 29 13 0.44 0.43
 -5 29 -13 0.62 0.51
 -5 29 -14 3.8 0.66
 -5 29 14 2.57 0.56
 5 29 -14 2.62 0.58
 -5 29 -15 1.09 0.42
 5 29 -15 1.23 0.42
 -5 -31 0 8.26 2.24
 -5 31 0 8.68 1.01
 -5 31 0 8.4 1.05
 -5 31 1 0.68 0.54
 -5 31 -1 1.32 0.62
 -5 -31 -1 1.19 1.02
 -5 -31 1 0.09 1.01
 -5 31 1 1.13 0.53
 -5 31 -1 1.48 0.61
 -5 31 2 5.61 0.81
 -5 -31 -2 4.45 1.61
 -5 31 -2 6.14 0.93
 -5 -31 2 4.8 1.54
 -5 31 -2 5.07 0.85
 -5 31 2 5.48 0.91
 -5 31 -3 1 0.56
 5 -31 -3 -0.35 1
 -5 31 3 -0.67 0.6
 -5 31 3 -0.64 0.61
 -5 -31 -3 -0.77 0.92
 -5 31 4 1 0.53
 -5 -31 -4 0.92 1.02
 5 -31 -4 0.6 0.99
 -5 31 4 0.52 0.51
 -5 -31 -5 2.46 1.4
 -5 31 5 2.28 0.69
 -5 31 5 2.42 0.74
 5 -31 -5 2.22 1.28
 -5 -31 -6 13.05 2.58
 -5 31 6 17 1.41
 5 -31 -6 12.14 2.85
 -5 31 6 17.8 1.43
 5 31 6 17.41 1.45
 5 31 7 2.52 0.71
 -5 31 7 2.54 0.67
 -5 31 7 0.45 0.83
 -5 31 8 2.05 0.6
 5 31 8 1.85 0.64
 -5 31 -9 0.59 0.47
 5 31 9 0.71 0.48
 -5 31 9 1.04 0.53
 -5 31 10 18.09 1.49
 -5 31 -10 17.84 1.37
 -5 31 -11 2.15 0.58
 5 31 -11 1.32 0.52
 -5 31 11 0.93 0.53
 -5 31 -12 0.16 0.38
 5 31 -12 0.03 0.39
 -5 31 13 0.18 0.44
 5 31 -13 0.44 0.4
 -5 31 -13 1.48 0.49
 -5 31 -14 17.78 1.19
 -5 31 14 14.14 1.06
 5 31 -14 16.64 1.12
 -5 33 0 0.33 0.58
 -5 -33 0 -0.08 0.85
 -5 33 0 1.11 0.52
 -5 33 -1 0.4 0.55
 -5 33 1 -0.19 0.47
 -5 33 1 -0.07 0.56
 -5 33 -1 0.51 0.56
 -5 -33 -1 0.8 1.3
 -5 -33 1 0.21 0.93
 -5 33 -2 1.99 0.7
 -5 33 2 0.96 0.52
 5 -33 -2 1.95 1.44
 -5 33 -2 1.36 0.65
 -5 -33 -2 1.98 1.34
 -5 33 2 1.57 0.66
 -5 -33 2 0.87 1.01
 -5 33 3 -0.64 0.74
 -5 33 -3 0.09 0.48
 -5 -33 -3 0.13 0.91
 5 -33 -3 -1.12 1.21
 -5 33 3 -0.68 0.61
 5 -33 -4 18.51 3.43
 -5 33 4 22.75 1.66
 -5 33 4 22.03 1.63
 -5 -33 -4 19.81 3.38
 5 33 5 2.74 0.81
 -5 33 5 1.49 0.68
 -5 33 5 1.6 0.66
 -5 33 6 86.57 3.08
 5 33 6 91.26 3.22
 -5 33 6 85.16 2.97
 5 33 7 3.25 0.8
 -5 33 7 2.32 0.67
 -5 33 8 2.61 0.63
 5 33 8 1.8 0.51
 5 33 9 -0.54 0.55
 -5 33 9 0.02 0.61
 -5 33 10 2.8 0.76
 -5 33 11 0.16 0.46
 -5 33 -11 0.13 0.36
 -5 33 -12 1.18 0.43
 -5 33 12 0.7 0.46
 -5 33 13 0.56 0.41
 -5 33 -13 0.56 0.33
 -5 35 0 26.02 1.8
 -5 35 0 25.7 1.66
 -5 -35 -1 0.63 1.14
 -5 35 -1 1.03 0.57
 -5 35 1 0.69 0.5
 -5 35 -1 0.8 0.56
 -5 35 1 0.43 0.59
 -5 35 -2 0.41 0.5
 -5 35 2 -0.14 0.59
 -5 35 -2 0.39 0.48
 -5 35 2 -0.62 0.64
 -5 35 3 0.27 0.47
 -5 35 -3 0.81 0.57
 -5 35 -3 1.01 0.57
 -5 35 3 -0.58 0.68
 -5 35 4 37.93 2.1
 5 35 4 41.52 2.2
 -5 35 4 37.39 2.05
 -5 35 -4 42.4 2.13
 -5 35 5 3.22 0.8
 5 35 5 5.46 1.04
 -5 35 5 4.23 0.92
 -5 35 6 63.71 2.72
 5 35 6 70.08 2.85
 5 35 7 -0.05 0.53
 -5 35 7 0.37 0.53
 5 35 8 0.48 0.47
 -5 35 8 1.98 0.68
 5 35 9 0.01 0.4
 -5 35 9 -0.1 0.58
 -5 35 10 0.13 0.45
 -5 35 11 -0.24 0.44
 -5 35 12 4.4 0.71
 -5 37 0 33.13 1.98
 -5 37 0 30.37 1.8
 -5 37 -1 0.23 0.53
 -5 37 1 0.06 0.45
 -5 37 1 -0.54 0.64
 -5 37 -1 -0.24 0.46
 -5 37 -2 4.5 0.82
 -5 37 2 3.11 0.65
 -5 37 -2 4.8 0.84
 -5 37 2 3.89 0.7
 -5 37 -3 1 0.51
 -5 37 3 -0.38 0.57
 -5 37 3 -0.45 0.66
 -5 37 -3 0.6 0.54
 -5 37 4 45.16 2.3
 5 37 4 49.14 2.48
 -5 37 4 41.47 2.14
 -5 37 -4 46.04 2.21
 5 37 5 2.76 0.87
 -5 37 5 1.76 0.67
 -5 37 -5 3.42 0.88
 5 37 6 13.67 1.34
 -5 37 6 13.51 1.31
 5 37 7 1.04 0.58
 -5 37 7 -0.25 0.54
 -5 37 8 -0.3 0.53
 5 37 8 -0.01 0.49
 5 37 9 0.01 0.37
 -5 37 9 -0.24 0.51
 -5 37 10 2.34 0.62
 -5 37 11 0.24 0.45
 -5 37 12 0.1 0.31
 -5 39 0 75.04 2.98
 -5 39 0 75.59 2.77
 -5 39 1 0.04 0.53
 -5 39 -1 1.37 0.65
 -5 39 -1 2.09 0.64
 -5 39 1 0.71 0.52
 -5 39 2 -1 0.73
 -5 39 -2 -0.44 0.59
 -5 39 -2 0.79 0.54
 -5 39 2 -0.64 0.61
 -5 39 3 0.58 0.49
 -5 39 3 0.31 0.58
 -5 39 -3 0.76 0.49
 -5 39 -3 0.12 0.46
 -5 39 4 13.48 1.35
 -5 39 -4 13.67 1.22
 5 39 4 14.86 1.42
 -5 39 5 -1.06 0.69
 -5 39 -5 0.34 0.52
 -5 39 6 3.18 0.83
 5 39 6 2.63 0.77
 -5 39 -6 3.12 0.74
 5 39 7 -0.14 0.56
 -5 39 -7 0.63 0.5
 -5 39 7 -0.64 0.54
 -5 39 8 7.51 0.96
 5 39 8 6.24 0.84
 -5 39 9 0.69 0.44
 5 39 9 0.76 0.5
 -5 39 -9 1.06 0.54
 -5 39 -10 13.42 1.08
 -5 39 10 11.1 1.04
 -5 39 11 0.21 0.4
 -5 39 -11 -0.14 0.37
 -5 41 0 49.21 2.22
 -5 41 0 51.78 2.43
 -5 41 -1 1.39 0.58
 -5 41 1 1.92 0.72
 -5 41 1 1.8 0.54
 -5 41 -1 2.24 0.66
 -5 41 -2 13.44 1.22
 5 41 2 16.46 1.48
 -5 41 2 13.73 1.21
 -5 41 2 15.14 1.36
 -5 41 -2 14.02 1.2
 -5 41 3 -0.59 0.58
 5 41 3 0.47 0.54
 -5 41 -3 -0.28 0.49
 5 41 4 2.94 0.75
 -5 41 4 1.94 0.63
 -5 41 -4 3.47 0.66
 -5 41 5 0.06 0.47
 5 41 5 -0.7 0.57
 -5 41 -5 0.12 0.41
 -5 41 6 1.64 0.6
 -5 41 -6 1.75 0.55
 5 41 6 1.5 0.55
 5 41 7 0.11 0.43
 -5 41 -7 1.21 0.52
 -5 41 7 0.63 0.53
 -5 41 -8 25.61 1.53
 -5 41 8 24.44 1.52
 5 41 8 21.3 1.44
 -5 41 -9 3.03 0.65
 -5 41 9 2.3 0.6
 -5 41 10 16.05 1.12
 -5 41 -10 17.73 1.15
 -5 43 0 42.87 1.98
 5 43 0 48.43 2.25
 -5 43 0 45.64 2.18
 -5 43 1 4.2 0.78
 5 43 1 5.4 0.99
 -5 43 -1 3.59 0.69
 -5 43 -1 4 0.68
 -5 43 2 20.28 1.51
 5 43 2 22.57 1.58
 -5 43 -2 19.49 1.33
 -5 43 -3 -0.32 0.45
 5 43 3 -0.31 0.51
 -5 43 3 0.56 0.55
 -5 43 4 0.01 0.45
 5 43 4 0.07 0.48
 -5 43 -4 0.22 0.42
 -5 43 5 0.29 0.53
 5 43 5 -0.25 0.46
 -5 43 -5 0.35 0.42
 -5 43 6 0.6 0.43
 5 43 6 0.78 0.42
 -5 43 -6 1.34 0.48
 -5 43 -7 0.92 0.47
 -5 43 7 0.75 0.42
 5 43 7 1.46 0.59
 -5 43 8 21.61 1.34
 -5 43 -8 23.6 1.31
 -5 45 0 33.69 1.77
 5 45 0 41.89 2
 -5 45 1 4.92 0.77
 -5 45 -1 2.62 0.56
 -5 45 -1 2.82 0.55
 5 45 1 4.33 0.79
 5 45 -1 5.08 0.86
 5 45 -2 4.84 0.8
 -5 45 2 3.77 0.69
 5 45 2 3.37 0.67
 -5 45 -2 2.13 0.47
 -5 45 3 0.48 0.46
 -5 45 -3 -0.74 0.4
 5 45 3 -0.74 0.53
 -5 45 4 0.03 0.38
 5 45 4 -0.58 0.5
 -5 45 -4 -0.28 0.38
 5 45 5 -0.49 0.41
 -5 45 5 0.71 0.42
 -5 45 -5 0 0.3
 -5 45 6 -0.45 0.45
 5 45 6 -0.34 0.42
 -5 45 -6 -0.14 0.31
 -5 45 7 -0.32 0.37
 5 47 0 8.34 0.87
 -5 47 1 1.25 0.48
 5 47 -1 1.99 0.55
 5 47 1 2.47 0.6
 5 47 2 -0.18 0.43
 -5 47 2 0.51 0.35
 5 47 -2 0.59 0.44
 5 47 3 -0.29 0.4
 -5 47 3 0.17 0.37
 5 47 -3 -0.26 0.4
 5 47 4 2.78 0.52
 -6 0 0 131.48 2.93
 -6 0 1 -0.02 0.34
 -6 0 -1 -0.01 0.32
 -6 0 -2 38.89 1.98
 -6 0 2 39.85 1.85
 -6 0 3 0.13 0.45
 -6 0 -3 0.16 0.54
 -6 0 -4 521.63 8.12
 -6 0 4 517.33 7.75
 -6 0 5 -0.24 0.61
 -6 0 -5 0.46 0.64
 -6 0 -6 64.99 3.31
 -6 0 6 67.31 3.41
 -6 0 -7 0.45 0.64
 -6 0 7 0.16 0.74
 -6 0 -8 1.22 0.73
 -6 0 8 1.23 0.34
 6 0 8 0.88 0.51
 -6 0 9 0.06 0.37
 -6 0 -9 -0.26 0.3
 6 0 9 0.44 0.49
 -6 0 -9 0.39 0.64
 -6 0 -10 0.19 0.31
 -6 0 -10 -0.48 0.68
 6 0 10 0.58 0.56
 -6 0 10 0.15 0.43
 6 0 11 1.09 0.71
 -6 0 -11 0.23 0.37
 -6 0 -11 -0.73 1.03
 -6 0 11 -0.18 0.49
 -6 0 12 6.17 0.9
 6 0 12 7.22 1.09
 -6 0 -12 6.42 0.79
 -6 0 -13 0.59 0.44
 -6 0 13 0.99 0.63
 6 0 13 1.27 0.97
 -6 0 -14 58.14 2.27
 -6 0 14 60.13 2.65
 -6 0 15 1.57 0.67
 -6 0 -15 2.13 0.65
 -6 0 16 25.13 1.79
 -6 0 17 0.19 0.49
 -6 0 18 1.8 0.6
 -6 0 19 1.16 0.5
 -6 -2 0 199.52 3.62
 -6 -2 1 0.03 0.34
 -6 -2 -1 -0.14 0.37
 -6 -2 1 0.26 0.23
 -6 2 -1 0.07 0.33
 -6 2 1 0.3 0.44
 -6 -2 2 115.35 2.91
 -6 -2 -2 116.94 3.37
 -6 2 2 114.46 3.18
 -6 2 -2 114.57 3.31
 -6 -2 -3 3.06 0.77
 -6 2 -3 2.38 0.7
 -6 -2 3 2.68 0.67
 -6 2 3 2.67 0.76
 -6 2 -4 327.75 6.37
 -6 -2 -4 326.1 6.47
 -6 -2 4 323.44 6.01
 -6 2 4 321.42 6.29
 -6 -2 -5 4.99 1.05
 -6 -2 5 3.92 0.93
 -6 2 -5 4.61 0.94
 -6 2 5 4.31 1.01
 -6 2 -6 33.76 2.37
 -6 2 6 34.73 2.49
 -6 -2 6 36.23 2.54
 -6 -2 -6 32.56 2.42
 -6 2 7 0.87 0.97
 -6 -2 -7 0.73 0.72
 -6 2 -7 0.56 0.64
 -6 2 8 5.8 0.65
 -6 -2 8 5.72 0.67
 -6 2 8 6.47 0.73
 -6 2 -8 5.86 1.18
 -6 2 -8 6.12 0.65
 6 2 8 5.65 0.75
 6 -2 8 6.32 0.8
 -6 -2 -8 7.62 1.43
 6 2 9 1.46 0.58
 -6 2 9 0.67 0.36
 -6 -2 -9 1.41 0.85
 -6 -2 9 0.91 0.42
 -6 -2 -9 1.15 0.4
 -6 2 9 1.65 0.5
 -6 2 -9 1.3 0.42
 6 -2 9 1.37 0.63
 -6 2 -9 1.18 0.7
 -6 -2 -10 8.03 0.78
 -6 2 -10 7.88 0.8
 -6 2 -10 8.22 1.57
 6 -2 10 9.29 1.06
 -6 -2 -10 7.76 1.59
 6 2 10 9.03 1
 -6 2 10 8.72 0.92
 -6 -2 10 7.27 0.79
 -6 -2 -11 -0.88 0.88
 -6 2 11 -0.31 0.47
 -6 -2 11 -0.61 0.54
 -6 -2 -11 0.1 0.39
 -6 2 -11 0.21 0.39
 6 2 11 0.96 0.67
 6 -2 11 1.05 0.72
 -6 -2 12 2.77 0.73
 -6 -2 -12 3.22 0.59
 -6 2 -12 2.37 0.58
 -6 2 12 3.31 0.78
 6 2 12 3.46 0.93
 6 -2 12 3.22 0.92
 -6 -2 -12 1.94 0.96
 -6 2 13 1.02 0.68
 -6 -2 13 1.64 0.64
 -6 -2 -13 0.52 0.45
 6 -2 13 2.13 0.96
 -6 2 -13 0.28 0.51
 -6 -2 14 41.02 2.22
 -6 -2 -14 36.75 1.81
 -6 2 14 41.82 2.23
 -6 2 -14 38.47 1.87
 -6 2 -15 1.96 0.58
 -6 2 15 0.3 0.58
 -6 -2 15 0.79 0.54
 -6 2 16 18.98 1.56
 -6 2 -16 19.17 1.34
 -6 -2 16 17.63 1.52
 -6 2 17 -1.01 0.56
 -6 -2 17 0.14 0.53
 -6 2 18 1.89 0.6
 -6 -2 18 0.67 0.49
 -6 2 19 1.37 0.48
 -6 -2 19 1.24 0.48
 -6 -4 0 170.48 3.54
 -6 -4 1 2.36 0.41
 -6 -4 1 2.55 0.45
 -6 -4 -1 2.58 0.59
 -6 -4 2 5.31 0.48
 -6 -4 2 5.81 0.69
 -6 -4 -2 5.58 0.89
 -6 4 -3 2.9 0.62
 -6 -4 3 3.98 0.71
 -6 4 3 2.78 0.63
 -6 -4 -3 3.86 0.8
 -6 -4 -4 0.9 0.54
 -6 4 -4 0.33 0.53
 -6 -4 4 0.93 0.5
 -6 4 4 0.91 0.61
 -6 -4 5 8.47 1.22
 6 -4 -5 5.82 0.74
 -6 4 5 6.86 1.13
 -6 -4 -5 6.9 1.14
 -6 4 -5 6.93 1.11
 -6 4 6 66.42 3.44
 -6 -4 -6 64.22 3.43
 -6 4 -6 70.1 3.42
 -6 -4 -7 1.22 0.94
 -6 4 7 1.55 0.97
 -6 4 -7 0.8 0.52
 -6 4 -8 65.6 3.82
 -6 4 8 63.92 3.99
 -6 -4 8 55.9 1.93
 -6 -4 -8 64.74 3.91
 -6 4 8 60.44 2
 6 4 8 60.45 2.11
 -6 4 8 56.29 1.97
 -6 4 -8 55.66 1.81
 6 -4 8 58.85 2.19
 -6 4 9 2.82 0.7
 -6 -4 9 2.53 0.56
 -6 -4 -9 1.35 0.43
 -6 4 -9 1.72 0.51
 6 4 9 2.46 0.72
 -6 4 9 1.56 0.49
 6 -4 9 2.27 0.7
 -6 -4 -9 2.13 0.98
 6 4 10 36.26 1.86
 -6 4 -10 32.17 1.52
 -6 4 10 36.28 1.7
 -6 4 10 36.47 1.76
 -6 -4 -10 34.97 3.23
 -6 -4 -10 29.03 1.39
 6 -4 10 33.66 1.89
 -6 -4 10 33.23 1.66
 -6 4 11 0.52 0.45
 -6 -4 -11 0.45 0.37
 -6 4 -11 0.83 0.42
 -6 -4 -11 0.12 0.62
 6 4 11 1.05 0.69
 6 -4 11 1.54 0.76
 -6 -4 11 0.58 0.48
 -6 -4 -12 0.06 0.64
 -6 4 12 0.12 0.46
 -6 4 -12 0.28 0.41
 -6 -4 12 0.01 0.52
 6 -4 12 1.57 0.84
 -6 4 -13 -0.28 0.48
 -6 -4 13 0.54 0.66
 6 -4 13 1.48 0.83
 6 -4 14 15.16 1.54
 -6 4 14 12.95 1.21
 -6 -4 14 15.86 1.49
 -6 4 -14 13.64 1.19
 -6 4 -15 0.82 0.44
 -6 -4 15 1.32 0.68
 -6 4 15 0.65 0.62
 -6 4 16 24.79 1.74
 -6 -4 16 23.96 1.77
 -6 4 -16 25.6 1.56
 -6 4 -17 0.26 0.34
 -6 4 17 0.92 0.52
 -6 -4 17 -0.32 0.57
 -6 -4 18 9.31 1.14
 -6 4 18 9 0.99
 6 4 -18 6.19 0.72
 -6 4 19 1.82 0.52
 -6 -4 19 2.36 0.59
 -6 -6 0 216.94 4.28
 -6 -6 -1 1.47 0.6
 -6 -6 1 1.75 0.46
 -6 -6 1 1.48 0.42
 -6 -6 2 1.27 0.33
 -6 -6 -2 1.76 0.59
 -6 -6 2 1.3 0.42
 -6 -6 3 1.12 0.2
 -6 -6 3 2.14 0.54
 -6 -6 -3 2.27 0.66
 -6 6 3 1.82 0.65
 -6 6 4 40.79 2.31
 -6 -6 4 39.97 2.08
 -6 -6 -4 37.93 2.45
 -6 6 5 1.51 0.77
 6 -6 -5 0.55 0.43
 -6 -6 -5 0.94 0.63
 -6 -6 -6 11.87 1.59
 6 -6 -6 11.15 1.2
 -6 6 6 12.61 1.58
 -6 6 7 5.16 1.13
 -6 -6 -7 5.18 1.13
 -6 -6 7 4.75 0.58
 -6 6 8 130.59 5.56
 -6 6 8 130.75 2.94
 -6 -6 8 128.39 2.93
 6 -6 8 126.68 3.13
 -6 -6 -8 138.47 5.69
 -6 6 -8 122.51 2.71
 -6 6 8 114.99 2.84
 -6 -6 9 15.58 1.19
 -6 -6 -9 18.23 2.3
 -6 6 9 16.87 1.19
 -6 6 -9 15.87 1.07
 6 -6 9 17.7 1.32
 -6 6 9 16.2 1.18
 -6 6 -10 106.69 2.74
 -6 6 10 111.35 2.89
 -6 6 10 117.07 3.18
 -6 -6 -10 116.78 5.94
 6 -6 10 113.36 3.29
 -6 -6 10 108.17 3.06
 -6 -6 -11 2.23 1.14
 6 -6 11 3.92 0.9
 -6 -6 11 1.42 0.55
 -6 6 11 4.15 0.77
 -6 6 -11 2.37 0.57
 -6 6 11 3.19 0.73
 -6 -6 -12 11.82 2.19
 -6 6 12 12.49 1.25
 -6 6 -12 11.68 1.05
 6 -6 12 14.47 1.5
 -6 -6 12 12.44 1.22
 -6 -6 13 -0.04 0.66
 -6 6 -13 -0.09 0.51
 -6 6 13 0.94 0.61
 6 -6 13 0.37 0.79
 -6 -6 14 5.17 0.97
 -6 6 -14 4.14 0.73
 6 -6 14 6.44 1.13
 -6 6 14 2.93 0.55
 -6 6 -15 2.34 0.63
 -6 -6 15 3.76 1
 -6 6 -16 1.41 0.58
 -6 6 16 1.05 0.54
 -6 -6 16 1.09 0.55
 -6 6 -17 0.02 0.37
 -6 -6 17 -0.09 0.51
 -6 6 17 0.78 0.49
 -6 6 -18 16.06 1.11
 -6 -6 18 18.58 1.39
 6 6 -18 16.7 1.14
 -6 6 18 16.38 1.26
 -6 -6 19 2.77 0.66
 -6 -8 0 232.25 4.9
 -6 -8 1 19.38 1.35
 -6 -8 1 18.25 0.84
 -6 -8 -1 20.63 1.61
 -6 8 2 42.88 2.22
 -6 -8 2 42.21 1.44
 -6 -8 2 40.55 1.75
 -6 -8 -2 41.28 2.37
 -6 -8 3 0.92 0.28
 -6 8 3 1.42 0.6
 -6 -8 -3 1.69 0.68
 -6 8 4 12.6 1.37
 -6 -8 -4 13.07 1.52
 6 -8 -5 0.12 0.42
 -6 -8 -5 0.23 0.56
 -6 8 5 0.28 0.54
 -6 8 6 4.64 1.1
 6 -8 -6 4.42 0.97
 -6 -8 -6 4.29 1.02
 -6 -8 -7 2.31 0.9
 -6 -8 7 2.4 0.51
 -6 8 -7 2.17 0.47
 -6 8 7 2.13 0.52
 -6 8 7 2.03 0.85
 -6 8 7 1.97 0.57
 -6 8 -8 28.97 1.36
 -6 -8 -8 30.31 2.76
 -6 8 8 27.75 2.71
 -6 8 8 31.37 1.5
 -6 -8 8 30.69 1.52
 6 -8 8 27.2 1.57
 -6 8 -9 23.69 1.32
 -6 -8 -9 26.01 2.8
 6 -8 9 25.36 1.6
 -6 8 9 26.57 1.45
 -6 -8 9 27.12 1.51
 -6 8 9 24.19 1.42
 -6 -8 -10 170.99 7.27
 -6 8 10 162.95 3.58
 -6 -8 10 168.96 3.8
 -6 8 10 177.76 3.88
 6 -8 10 162.59 4.05
 -6 8 -10 164.65 3.46
 -6 -8 -11 14.22 2.3
 -6 8 -11 13.04 1.1
 6 -8 11 14.1 1.4
 -6 -8 11 13.07 1.24
 -6 8 11 13.21 1.19
 -6 8 11 13.39 1.24
 -6 8 -12 26.65 1.57
 -6 8 12 28.35 1.64
 -6 -8 12 27.29 1.77
 -6 -8 -12 25.54 3.18
 6 -8 12 28.36 1.97
 -6 8 12 30.43 1.86
 -6 -8 -13 0.79 0.88
 -6 -8 13 0.19 0.55
 6 -8 13 1.8 0.9
 -6 8 -13 0.45 0.49
 -6 8 13 -0.69 0.76
 -6 -8 14 23.6 1.81
 -6 8 14 22.26 1.64
 6 -8 14 22.9 1.85
 -6 8 -14 23.29 1.49
 -6 8 -15 -0.13 0.58
 -6 8 15 -0.2 0.56
 -6 8 -16 0.21 0.42
 -6 -8 16 -0.84 0.73
 -6 8 16 0.44 0.51
 -6 8 -17 0.75 0.47
 -6 -8 17 0.49 0.54
 6 8 -18 23.35 1.37
 -6 -8 18 21.78 1.5
 -6 8 -18 21.86 1.29
 -6 -8 19 3.59 0.69
 -6 -10 0 159.82 4.45
 -6 -10 1 23.4 1.66
 -6 -10 -1 24.34 1.88
 -6 10 1 23.85 1.75
 -6 10 2 98.42 3.47
 -6 -10 2 95.42 3.09
 -6 -10 -2 96.09 3.83
 -6 -10 3 11.03 1
 -6 -10 -3 10.44 1.43
 -6 10 3 11.21 1.31
 -6 -10 -4 0.4 0.65
 -6 10 4 0.35 0.46
 -6 -10 4 0.39 0.27
 -6 -10 -5 2.52 0.9
 -6 10 5 2.6 0.86
 6 -10 -6 34.12 2.54
 -6 10 6 35.64 2.66
 -6 -10 -6 36.94 2.8
 -6 -10 7 0.26 0.36
 -6 10 -7 0.31 0.34
 6 -10 -7 -0.14 0.52
 -6 10 7 0.59 0.55
 -6 10 7 0.37 0.61
 -6 -10 -7 -0.44 0.72
 -6 10 7 0.24 0.39
 -6 -10 -8 50.19 3.7
 -6 10 -8 46.95 1.77
 -6 10 8 47.19 3.54
 -6 10 8 48.29 1.88
 6 -10 8 44.39 1.91
 -6 -10 8 47.52 1.92
 -6 10 8 50.65 2.03
 -6 10 -9 15 1.08
 -6 -10 -9 14.63 2.23
 -6 10 9 12.27 1.04
 -6 10 9 14.85 1.13
 -6 -10 9 17.33 1.26
 6 -10 9 15.05 1.26
 -6 10 -10 148.73 3.34
 -6 -10 -10 143.08 6.8
 -6 10 10 144.32 3.4
 -6 -10 10 152.97 3.72
 -6 10 10 148.23 3.58
 6 -10 10 146.87 3.83
 -6 10 -11 22.07 1.4
 -6 10 11 21.88 1.51
 -6 10 11 23.74 1.57
 -6 -10 -11 20.77 2.78
 6 -10 11 23.49 1.73
 -6 -10 11 22.32 1.58
 -6 10 -12 15.87 1.24
 -6 10 12 15.07 1.25
 -6 -10 -12 14.2 2.44
 6 -10 12 15.22 1.53
 -6 10 12 14.71 1.28
 -6 -10 12 16.25 1.4
 -6 -10 13 -0.02 0.55
 -6 10 -13 0.83 0.55
 -6 -10 -13 0.96 0.67
 6 -10 13 1.81 0.9
 -6 10 13 -0.24 0.59
 -6 -10 14 2.41 0.83
 -6 10 -14 1.83 0.49
 -6 10 14 1.28 0.53
 -6 10 -15 0.11 0.57
 -6 -10 15 1.64 0.76
 -6 10 15 0.16 0.44
 -6 10 -16 -0.39 0.46
 -6 10 16 -0.1 0.43
 -6 10 17 1.4 0.53
 -6 -10 17 0.69 0.54
 -6 10 -17 0.54 0.41
 6 10 -18 16.56 1.22
 -6 -10 18 16.29 1.28
 -6 10 -18 15.85 1.11
 -6 -10 19 3.65 0.65
 -6 -12 0 174.03 5.05
 -6 -12 1 29.32 2.03
 -6 -12 -1 28.7 2.17
 -6 12 1 29.95 2.03
 -6 -12 2 19.69 1.63
 -6 -12 -2 19.79 1.88
 -6 12 2 18.77 1.65
 -6 -12 -3 0.72 0.73
 -6 -12 3 0.51 0.39
 -6 12 3 0.85 0.55
 -6 -12 4 8.03 0.91
 -6 12 4 7.44 1.15
 -6 -12 -4 7.9 1.34
 -6 -12 -5 61.57 3.63
 -6 12 5 62.04 3.35
 -6 12 -6 112.85 2.56
 -6 -12 -6 112.8 5.11
 -6 -12 6 106 2.67
 6 -12 -6 112.79 4.9
 -6 12 6 109.57 2.73
 -6 12 6 112.18 4.7
 -6 12 6 109.84 2.59
 -6 -12 7 0.5 0.37
 -6 12 -7 0.11 0.34
 -6 12 7 0.58 0.46
 6 -12 -7 0.03 0.57
 -6 -12 -7 -0.26 0.69
 -6 12 7 0.3 0.37
 -6 12 7 -0.68 0.76
 -6 12 -8 33.15 1.51
 -6 12 8 34.14 2.99
 6 -12 8 26.26 1.55
 -6 12 8 32.52 1.6
 -6 -12 8 32.08 1.61
 -6 12 8 32.83 1.7
 -6 -12 -8 33.65 3.05
 -6 -12 9 24.21 1.57
 -6 12 -9 24.61 1.4
 -6 -12 -9 24.48 2.84
 -6 12 9 24.49 1.5
 6 -12 9 22.07 1.52
 -6 12 -10 71.24 2.34
 -6 -12 -10 69.37 4.87
 6 -12 10 67.63 2.74
 -6 12 10 72.41 2.46
 -6 -12 10 75.05 2.74
 -6 12 -11 12 1.11
 -6 -12 -11 11.33 2.08
 -6 -12 11 12.23 1.23
 -6 12 11 11.93 1.16
 6 -12 11 11.31 1.33
 -6 12 11 10.74 1.09
 6 -12 12 3.19 0.95
 -6 -12 12 1.95 0.72
 -6 12 -12 1.77 0.6
 -6 12 12 2.55 0.69
 -6 -12 -12 2.22 1.3
 -6 12 12 0.62 0.51
 -6 -12 -13 0.17 0.77
 -6 12 -13 -0.35 0.56
 -6 12 13 0.68 0.59
 -6 12 13 -0.2 0.53
 -6 -12 13 0.82 0.68
 -6 12 -14 9.59 1.04
 -6 12 14 8.71 1.09
 -6 -12 14 9.07 1.17
 -6 12 -15 3.84 0.75
 -6 -12 15 5.28 0.97
 -6 12 -16 1.63 0.58
 -6 -12 16 1.53 0.64
 -6 12 -17 -0.84 0.52
 -6 -12 17 -0.45 0.59
 6 12 -18 2.83 0.6
 -6 12 -18 3.4 0.6
 -6 -12 18 3.22 0.7
 -6 -14 0 50.97 2.97
 -6 14 0 50.07 2.7
 -6 -14 1 13.38 1.54
 -6 -14 -1 14.31 1.68
 -6 14 1 12.91 1.44
 -6 -14 2 6.24 1.02
 -6 -14 -2 6.04 1.2
 -6 14 2 6.34 1.07
 -6 -14 -3 14.83 1.82
 -6 -14 3 14.99 1.53
 -6 14 3 14.55 1.57
 -6 -14 4 178.71 4.82
 -6 -14 -4 173.5 6.11
 -6 14 4 188.18 5.61
 -6 14 5 55.64 3.21
 -6 14 5 52.79 1.8
 -6 -14 -5 57.27 3.61
 -6 -14 6 90.6 2.55
 6 -14 -6 90.32 4.66
 -6 14 -6 92.49 2.41
 -6 -14 -6 91.03 4.75
 -6 14 6 88.35 4.34
 -6 14 6 94.4 2.61
 -6 14 6 90.67 2.44
 -6 14 7 22.08 1.39
 -6 14 -7 21.7 1.25
 -6 14 7 19.87 2.26
 6 -14 -7 20.68 2.41
 -6 14 7 20.91 1.26
 -6 -14 7 21.28 1.34
 -6 -14 -7 22.27 2.52
 -6 14 8 3.45 0.61
 -6 -14 8 4.36 0.69
 -6 14 -8 3.53 0.59
 -6 -14 -8 2.78 1.09
 -6 14 8 4.44 0.79
 -6 14 8 4.6 1.31
 6 -14 8 2.89 0.61
 -6 14 -9 11.29 1.01
 6 -14 9 10.09 1.06
 -6 14 9 12.22 1.08
 -6 -14 9 12.84 1.15
 -6 -14 -9 11.17 2.06
 -6 14 -10 18.16 1.28
 -6 14 10 17.99 1.38
 6 -14 10 16.95 1.44
 -6 -14 -10 15.32 2.36
 -6 -14 10 18.34 1.43
 -6 -14 -11 0.07 0.68
 -6 14 -11 0.17 0.47
 -6 14 11 -0.34 0.52
 -6 -14 11 0.14 0.53
 6 -14 11 1.31 0.72
 -6 -14 12 3.19 0.8
 -6 14 12 2.76 0.71
 -6 14 -12 2.62 0.69
 6 -14 12 3.26 0.91
 -6 -14 -12 1.17 0.96
 -6 14 -13 7.61 0.98
 6 -14 13 6.86 1.17
 -6 14 13 6.94 0.96
 -6 -14 13 7.41 1.18
 -6 -14 14 29.59 2
 -6 14 -14 28.51 1.72
 -6 -14 15 14.58 1.45
 -6 14 -15 16.59 1.34
 -6 -14 16 8.22 1.1
 -6 14 -16 9.45 1.01
 -6 14 -17 -0.38 0.42
 -6 -14 17 0.18 0.49
 -6 14 -18 0.87 0.41
 6 14 -18 0.72 0.41
 -6 -14 18 0.8 0.49
 -6 -16 0 16.6 1.84
 -6 16 0 16.84 1.7
 -6 16 1 1.11 0.64
 -6 -16 1 1.91 0.68
 -6 -16 -1 1.37 0.62
 -6 -16 2 26.98 2.26
 -6 -16 -2 25.02 2.38
 -6 16 2 24.06 2.04
 -6 -16 3 143.93 4.97
 -6 16 3 142.17 4.88
 -6 -16 -3 138.79 5.6
 -6 -16 4 138.81 4.73
 -6 16 4 129.62 2.78
 -6 -16 -4 139.85 5.74
 -6 16 4 129.51 2.87
 -6 16 4 143.13 5.12
 -6 16 5 94.59 2.46
 -6 16 5 97.17 4.4
 -6 16 5 96.99 2.64
 -6 -16 -5 97.01 4.91
 -6 16 -5 93.06 2.42
 -6 -16 6 120.75 3.12
 6 -16 -6 119.06 5.65
 -6 16 6 119.28 2.87
 -6 16 6 125.29 3.11
 -6 16 6 123.02 5.18
 -6 -16 -6 127.27 5.88
 -6 16 -6 128.18 2.89
 -6 16 -7 20.49 1.25
 -6 -16 -7 20.85 2.54
 -6 16 7 20.73 2.31
 -6 16 7 21.14 1.38
 -6 16 7 19.84 1.26
 -6 -16 7 22.61 1.39
 6 -16 -7 17.85 2.37
 -6 16 8 0.75 0.83
 -6 -16 8 0.01 0.46
 -6 16 -8 0.39 0.37
 -6 16 8 0.5 0.55
 -6 16 8 -0.07 0.46
 -6 -16 -8 0.18 0.82
 -6 -16 9 6.36 0.92
 -6 16 9 6.28 0.88
 -6 16 9 7.58 1.03
 -6 16 -9 5.86 0.81
 -6 -16 -9 5.02 1.45
 -6 -16 -10 0.28 0.66
 -6 -16 10 0.66 0.55
 -6 16 -10 1.7 0.6
 6 -16 10 1.3 0.71
 -6 16 10 1.89 0.7
 -6 -16 11 -0.01 0.57
 -6 16 -11 -0.01 0.43
 -6 -16 -11 0.1 0.71
 -6 16 11 0.19 0.51
 6 -16 11 0.21 0.63
 -6 16 -12 19.08 1.37
 -6 16 12 15.56 1.32
 6 -16 12 15.95 1.5
 -6 -16 12 19.29 1.59
 -6 16 -13 19.44 1.42
 -6 16 13 16.82 1.37
 -6 -16 13 17.26 1.57
 -6 -16 14 50.99 2.58
 -6 16 -14 48.64 2.22
 -6 -16 15 27.01 1.91
 -6 16 -15 31.43 1.81
 -6 -16 16 16.91 1.5
 -6 16 -16 22.83 1.52
 -6 16 -17 2.6 0.62
 6 16 -17 2.09 0.58
 -6 -16 17 1.68 0.53
 -6 16 -18 0.04 0.33
 6 16 -18 -0.14 0.4
 -6 -16 18 0.23 0.46
 -6 -18 0 7.28 1.39
 -6 18 0 7.13 1.26
 -6 -18 1 1.63 0.85
 -6 -18 -1 0.94 0.62
 -6 18 -1 0.85 0.58
 -6 18 1 1.29 0.7
 -6 -18 2 29.89 2.57
 -6 -18 -2 29.42 2.73
 -6 18 2 27.94 1.27
 -6 18 2 29.85 2.35
 -6 -18 3 77.27 3.98
 -6 -18 -3 75.94 4.43
 -6 18 3 71.41 2.1
 -6 18 3 71.37 2.13
 -6 18 3 78.87 3.84
 -6 -18 -4 135.86 6.01
 -6 -18 4 132.64 5.07
 -6 18 4 132.71 2.91
 -6 18 4 135.01 5.24
 -6 18 4 125.4 2.97
 -6 18 5 89.07 2.47
 -6 -18 -5 92.05 5.09
 -6 -18 5 79.72 2.51
 -6 18 5 90.81 2.67
 -6 18 5 91.38 4.37
 -6 18 -5 87.55 2.41
 -6 18 -6 101.14 2.72
 -6 -18 6 99.84 2.91
 -6 18 6 102.88 2.95
 6 -18 -6 96.45 5.36
 -6 18 6 98.56 4.79
 -6 -18 -6 101.11 5.42
 -6 18 6 98.3 2.65
 -6 -18 7 37.57 1.83
 6 -18 -7 33.75 3.37
 -6 18 7 33.58 3.03
 -6 18 7 35.38 1.68
 -6 18 -7 35.99 1.64
 -6 -18 -7 34.33 3.33
 -6 18 7 37.8 1.85
 -6 -18 8 -0.22 0.47
 -6 18 -8 0.07 0.43
 6 -18 -8 0.42 0.71
 -6 18 8 -0.32 0.49
 -6 18 8 0.07 0.64
 -6 -18 -8 0.38 0.83
 -6 18 8 0.36 0.53
 -6 -18 9 3.35 0.69
 -6 18 -9 2.75 0.63
 -6 -18 -9 2.29 1.12
 -6 18 9 3.59 0.85
 -6 18 9 2.46 0.67
 -6 -18 10 0.23 0.59
 -6 18 -10 0.29 0.44
 -6 18 10 0.73 0.59
 -6 -18 -10 0.36 0.86
 -6 -18 11 0.2 0.56
 -6 18 11 1.46 0.67
 -6 18 -11 0.94 0.49
 -6 -18 -11 0.98 0.8
 -6 -18 12 7.29 1.14
 -6 18 -12 6.35 0.94
 -6 18 12 6 0.89
 -6 18 13 17.57 1.44
 -6 18 -13 21.3 1.48
 -6 -18 13 22.1 1.76
 -6 -18 14 40.5 2.37
 -6 18 14 34.82 1.89
 -6 18 -14 39.64 2.04
 -6 -18 15 41.33 2.31
 -6 18 -15 47.21 2.14
 -6 18 -16 23.56 1.49
 -6 -18 16 20.82 1.59
 6 18 -17 2.35 0.6
 -6 18 -17 2.86 0.58
 -6 -18 17 1.8 0.57
 6 18 -18 -0.48 0.34
 -6 -20 0 26.9 2.72
 -6 20 0 26.46 2.28
 -6 20 0 23.48 1.19
 -6 -20 1 8.68 1.62
 -6 20 1 8.12 0.77
 -6 20 1 8.34 1.33
 -6 -20 -1 8.05 1.59
 -6 20 -1 8.93 1.3
 -6 20 1 7.45 0.71
 -6 -20 2 0.87 0.73
 -6 20 2 0.61 0.37
 -6 20 2 1.09 0.37
 -6 20 2 0.47 0.57
 -6 -20 -2 1.59 0.86
 -6 20 3 37.39 1.63
 -6 20 3 41.96 2.94
 -6 20 3 38.65 1.69
 -6 -20 -3 41.24 3.46
 -6 -20 3 39.86 3.11
 -6 20 4 62.76 2.17
 -6 -20 4 58.84 3.68
 -6 20 4 60.16 2.07
 -6 20 4 59.94 3.64
 -6 -20 -4 63.46 4.37
 6 -20 -5 79.64 4.99
 -6 -20 5 71.63 2.45
 -6 20 5 77.82 2.43
 -6 20 5 85.08 2.66
 -6 -20 -5 83.43 5.07
 -6 20 5 78.78 4.3
 -6 20 -5 80.77 2.37
 -6 -20 6 36.4 1.81
 6 -20 -6 33.01 3.37
 -6 20 6 34.75 2.98
 -6 20 6 35.7 1.67
 -6 -20 -6 37.03 3.49
 -6 20 6 37.85 1.89
 -6 20 -6 40.42 1.75
 -6 20 7 14.51 2.15
 -6 20 7 14.77 1.17
 6 -20 -7 12.9 2.21
 -6 20 -7 14.33 1.11
 -6 20 7 15.36 1.27
 -6 -20 7 15.65 1.26
 -6 -20 -7 17.3 2.51
 6 20 7 12.42 1.07
 -6 -20 8 -0.07 0.48
 -6 20 -8 0.05 0.42
 -6 -20 -8 -0.02 0.76
 -6 20 8 -0.12 0.72
 -6 20 8 -0.17 0.49
 6 -20 -8 -0.01 0.72
 -6 20 8 0.28 0.54
 -6 20 -9 13.33 1.17
 -6 20 9 13.75 1.22
 -6 -20 -9 13.85 2.4
 -6 20 9 13.22 1.25
 -6 -20 9 13.44 1.29
 -6 20 10 3.38 0.81
 -6 -20 10 1.73 0.68
 -6 -20 -10 1.73 1.14
 -6 20 -10 2.05 0.63
 -6 -20 11 0.82 0.68
 -6 20 -11 1.04 0.59
 -6 20 11 1.57 0.7
 -6 -20 12 1.08 0.57
 -6 20 -12 0.52 0.52
 -6 20 12 0.58 0.53
 -6 20 -13 4.06 0.77
 -6 20 13 4.16 0.78
 -6 -20 13 5.35 1.05
 -6 20 14 25.65 1.71
 -6 -20 14 31.12 2.05
 -6 20 -14 29.68 1.74
 -6 -20 15 28.06 1.86
 -6 20 -15 29.53 1.71
 -6 20 -16 9.97 1.01
 -6 -20 16 7.15 0.96
 6 20 -17 2.19 0.54
 -6 -20 17 0.63 0.38
 -6 20 -17 1.69 0.48
 -6 22 0 64.84 2.15
 -6 -22 0 74.23 4.73
 -6 22 0 69.73 2.09
 -6 22 0 69.16 3.77
 -6 22 1 97.35 2.55
 -6 -22 1 107.51 5.61
 -6 -22 -1 103.29 5.65
 -6 22 1 103.99 4.61
 -6 22 1 97.66 2.67
 -6 22 -1 103.66 4.64
 -6 22 -2 -0.29 0.58
 -6 22 -2 0.3 0.33
 -6 22 2 0.08 0.39
 -6 -22 2 -0.28 0.73
 -6 22 2 -0.02 0.37
 -6 -22 -2 -0.07 0.82
 -6 22 2 -0.09 0.59
 -6 -22 -3 13.59 2.18
 -6 22 3 15.32 1.96
 -6 22 3 14.79 1.08
 -6 22 3 14.13 1.08
 -6 -22 3 14.39 2.08
 -6 22 4 26.19 1.46
 -6 -22 -4 24.86 2.97
 -6 22 4 24.93 1.43
 -6 22 -4 21.01 1.2
 -6 22 4 24.34 2.47
 -6 22 5 61.22 3.93
 -6 -22 -5 59.36 4.54
 -6 22 5 60.33 2.37
 -6 22 -5 57.84 2.04
 -6 22 5 63.14 2.22
 6 -22 -5 59.81 4.61
 -6 -22 -6 8.98 1.95
 -6 22 6 9.74 0.95
 6 -22 -6 8.45 1.91
 -6 -22 6 10.38 1.06
 -6 22 6 8.36 1.62
 -6 22 6 11.1 1.11
 -6 22 -6 10.66 0.96
 -6 -22 7 1.81 0.6
 -6 -22 -7 1.78 0.95
 6 22 7 1.56 0.54
 -6 22 7 1.57 0.7
 -6 22 7 0.9 0.5
 -6 22 7 1.26 0.82
 6 -22 -7 1.94 1.21
 -6 22 -7 1.52 0.48
 -6 -22 8 0.62 0.54
 -6 22 -8 -0.1 0.48
 -6 22 8 0.79 0.58
 -6 -22 -8 -0.66 0.86
 -6 22 8 1 0.99
 6 -22 -8 0.61 0.84
 -6 22 8 0.44 0.49
 -6 22 9 17.42 1.4
 -6 -22 9 17.35 1.48
 -6 22 9 15.06 1.35
 -6 -22 -9 13.48 2.42
 -6 22 -9 16.44 1.27
 -6 22 10 24.93 1.69
 -6 -22 -10 24.01 3.26
 -6 -22 10 27.36 1.9
 -6 22 -10 26.06 1.64
 -6 22 11 15.61 1.37
 -6 -22 11 16.15 1.5
 -6 22 -11 15.93 1.32
 -6 -22 12 2.48 0.75
 -6 22 12 1.79 0.6
 -6 22 -12 3.47 0.68
 -6 -22 13 1.85 0.65
 -6 22 -13 1.77 0.58
 -6 22 13 1.43 0.6
 -6 22 -14 3.11 0.67
 -6 22 14 3.47 0.77
 -6 -22 14 1.58 0.62
 -6 -22 15 11.95 1.27
 -6 22 -15 15.87 1.26
 -6 22 -16 3.36 0.61
 6 22 -16 3.48 0.74
 -6 -22 16 1.53 0.55
 -6 22 -17 -0.28 0.35
 6 22 -17 0.4 0.38
 -6 24 0 96.95 4.67
 -6 -24 0 95.58 5.74
 -6 24 0 95.3 2.71
 -6 24 0 93.76 2.6
 -6 -24 1 148.77 7.08
 -6 -24 -1 145.69 7.1
 -6 24 1 141.69 3.18
 -6 24 -1 135.33 3.16
 -6 24 1 146.96 5.77
 -6 24 1 144.93 3.35
 -6 24 -1 145.77 5.69
 -6 24 2 9.45 0.97
 -6 -24 -2 11.17 2.1
 -6 24 -2 8.46 0.86
 -6 -24 2 9.39 1.89
 -6 24 2 9.62 1.58
 -6 24 2 9.95 0.94
 -6 24 -2 9.95 1.53
 -6 24 -3 0.42 0.6
 -6 24 3 0.25 0.39
 -6 -24 -3 0.46 0.82
 -6 -24 3 0.68 0.6
 -6 24 3 0.7 0.61
 -6 24 3 1.04 0.52
 -6 24 4 5.05 0.73
 -6 24 4 3.85 0.58
 -6 24 4 4.42 1.11
 -6 -24 -4 3.23 1.27
 6 -24 -5 16.91 2.62
 -6 24 5 16.57 2.16
 -6 24 5 17.71 1.33
 -6 -24 -5 17.01 2.56
 -6 24 5 18.14 1.35
 -6 24 -5 15.41 1.12
 -6 24 6 1.17 0.72
 -6 -24 -6 0.55 0.79
 -6 24 -6 1.42 0.42
 -6 24 6 1.44 0.51
 6 -24 -6 0.5 0.73
 -6 24 6 1.74 0.63
 -6 24 -7 -0.06 0.43
 -6 -24 -7 -0.67 0.94
 -6 24 7 1.51 1.05
 -6 24 7 0.63 0.63
 -6 24 7 -1.05 0.67
 6 24 7 0.27 0.46
 6 -24 -7 0.22 0.76
 -6 24 8 12.28 2.28
 -6 24 8 14.01 1.27
 6 24 8 13.25 1.19
 -6 -24 -8 11.96 2.32
 6 -24 -8 9.65 2.26
 -6 24 8 12.61 1.23
 -6 24 -8 14.29 1.2
 -6 24 9 64.54 2.68
 -6 -24 9 64.21 2.75
 -6 24 9 61.53 2.58
 -6 24 -9 66.24 2.51
 -6 24 10 19.23 1.57
 -6 -24 10 21.58 1.68
 -6 24 -10 19.88 1.43
 -6 24 11 42.25 2.22
 -6 -24 11 41.16 2.34
 -6 24 -11 41.23 2.07
 -6 -24 12 -0.06 0.48
 -6 24 -12 0.84 0.48
 -6 24 12 0.08 0.63
 -6 24 -13 0.66 0.55
 -6 24 13 0.9 0.49
 -6 -24 13 0.94 0.49
 -6 24 -14 -0.15 0.46
 -6 24 14 0.44 0.45
 -6 24 -15 1.5 0.51
 -6 -24 15 -0.11 0.48
 -6 24 -16 -0.12 0.43
 6 24 -16 0.41 0.38
 -6 26 0 51.9 3.58
 -6 -26 0 50.94 4.51
 -6 26 0 54.37 2.16
 -6 26 0 55.18 2.09
 -6 -26 1 151.17 7.55
 -6 -26 -1 150.42 7.68
 -6 26 1 149.36 3.36
 -6 26 1 150.06 3.62
 -6 26 -1 150.77 3.49
 -6 26 1 143.53 5.97
 -6 26 -1 147.76 5.98
 -6 26 -1 147.67 3.35
 -6 -26 2 9.18 1.94
 -6 26 2 10.2 1.04
 -6 26 -2 8.15 0.89
 -6 -26 -2 9.32 2.03
 -6 26 2 8.61 1.58
 -6 26 -2 9.58 1.6
[truncated: 385,449 more chars]
