# Supplementary material
Source: publisher figshare collection journal article supplement (https://acs.figshare.com/ndownloader/files/16775912)
Supplement: Supplementary file 1 [file 16775912 › LIFM-114-Ether-solved.cif]

data_LIFM-114-Ether
_audit_creation_date              2017-12-07
_audit_creation_method
;
Olex2 1.2
(compiled 2017.08.10 svn.r3458 for OlexSys, GUI svn.r5381)
;
_shelx_SHELXL_version_number      '2014/7'
_publ_contact_author_address      ?
_publ_contact_author_email        ?
_publ_contact_author_id_orcid     ?
_publ_contact_author_name         ''
_publ_contact_author_phone        ?
_publ_section_references
;
Dolomanov, O.V., Bourhis, L.J., Gildea, R.J, Howard, J.A.K. & Puschmann, H.
 (2009), J. Appl. Cryst. 42, 339-341.

Sheldrick, G.M. (2015). Acta Cryst. C71, 3-8.
;
_chemical_name_common             LIFM-114-Ether
_chemical_name_systematic         ?
_chemical_formula_moiety
'C108 H64 O32 Zr6 [+ solvent]'
_chemical_formula_sum             'C108 H64 O32 Zr6'
_chemical_formula_weight          2420.91
_chemical_melting_point           ?
loop_
  _atom_type_symbol
  _atom_type_description
  _atom_type_scat_dispersion_real
  _atom_type_scat_dispersion_imag
  _atom_type_scat_source
 'C' 'C' 0.0181 0.0091 'International Tables Vol C Tables 4.2.6.8 and 6.1.1.4'
 'O' 'O' 0.0492 0.0322 'International Tables Vol C Tables 4.2.6.8 and 6.1.1.4'
 'Zr' 'Zr' -0.1862 2.2449
 'International Tables Vol C Tables 4.2.6.8 and 6.1.1.4'
 'H' 'H' 0.0000 0.0000 'International Tables Vol C Tables 4.2.6.8 and 6.1.1.4'

_shelx_space_group_comment
;
The symmetry employed for this shelxl refinement is uniquely defined
by the following loop, which should always be used as a source of
symmetry information in preference to the above space-group names.
They are only intended as comments.
;
_space_group_crystal_system       'orthorhombic'
_space_group_IT_number            65
_space_group_name_H-M_alt         'C m m m'
_space_group_name_Hall            '-C 2 2'
loop_
  _space_group_symop_operation_xyz
 'x, y, z'
 '-x, -y, z'
 'x, -y, -z'
 '-x, y, -z'
 'x+1/2, y+1/2, z'
 '-x+1/2, -y+1/2, z'
 'x+1/2, -y+1/2, -z'
 '-x+1/2, y+1/2, -z'
 '-x, -y, -z'
 'x, y, -z'
 '-x, y, z'
 'x, -y, z'
 '-x+1/2, -y+1/2, -z'
 'x+1/2, y+1/2, -z'
 '-x+1/2, y+1/2, z'
 'x+1/2, -y+1/2, z'

_cell_length_a                    20.557(2)
_cell_length_b                    42.7525(17)
_cell_length_c                    17.8758(7)
_cell_angle_alpha                 90
_cell_angle_beta                  90
_cell_angle_gamma                 90
_cell_volume                      15710.4(18)
_cell_formula_units_Z             4
_cell_measurement_reflns_used     5276
_cell_measurement_temperature     150(2)
_cell_measurement_theta_max       63.0950
_cell_measurement_theta_min       4.8090
_shelx_estimated_absorpt_T_max    ?
_shelx_estimated_absorpt_T_min    ?
_exptl_absorpt_coefficient_mu     3.597
_exptl_absorpt_correction_T_max   1.00000
_exptl_absorpt_correction_T_min   0.31499
_exptl_absorpt_correction_type    multi-scan
_exptl_absorpt_process_details
;
CrysAlisPro 1.171.38.43 (Rigaku Oxford Diffraction, 2015)
Empirical absorption correction using spherical harmonics,
 implemented in SCALE3 ABSPACK scaling algorithm.
;
_exptl_absorpt_special_details    ?
_exptl_crystal_colour             Colourless
_exptl_crystal_density_diffrn     1.024
_exptl_crystal_density_meas       ?
_exptl_crystal_density_method     ?
_exptl_crystal_description        Rod
_exptl_crystal_F_000              4832
_exptl_crystal_size_max           0.3
_exptl_crystal_size_mid           0.1
_exptl_crystal_size_min           0.1
_exptl_transmission_factor_max    ?
_exptl_transmission_factor_min    ?
_diffrn_reflns_av_R_equivalents   0.0429
_diffrn_reflns_av_unetI/netI      0.0425
_diffrn_reflns_Laue_measured_fraction_full 0.964
_diffrn_reflns_Laue_measured_fraction_max 0.964
_diffrn_reflns_limit_h_max        23
_diffrn_reflns_limit_h_min        -17
_diffrn_reflns_limit_k_max        49
_diffrn_reflns_limit_k_min        -30
_diffrn_reflns_limit_l_max        20
_diffrn_reflns_limit_l_min        -9
_diffrn_reflns_number             14971
_diffrn_reflns_point_group_measured_fraction_full 0.964
_diffrn_reflns_point_group_measured_fraction_max 0.964
_diffrn_reflns_theta_full         63.516
_diffrn_reflns_theta_max          63.516
_diffrn_reflns_theta_min          3.436
_diffrn_ambient_environment       N~2~
_diffrn_ambient_temperature       150(2)
_diffrn_detector                  'CCD plate'
_diffrn_detector_area_resol_mean  10.6525
_diffrn_detector_type             Atlas
_diffrn_measured_fraction_theta_full 0.964
_diffrn_measured_fraction_theta_max 0.964
_diffrn_measurement_details
;
List of Runs (angles in degrees, time in seconds):

  # Type    Start    End  Width  t~exp~   \w     \q     \k     \f   Frames
--------------------------------------------------------------------------
  1  \w   -130.00 -35.00   1.00   18.00    --  -40.95-178.00-180.00   95
  2  \w    104.00 155.00   1.00   28.00    --   86.42 125.00 -90.00   51
  3  \w    101.00 160.00   1.00   28.00    --   86.42 125.00-150.00   59
  4  \w     43.00 142.00   1.00   28.00    --   86.42  15.00 -30.00   99
;
_diffrn_measurement_device        'four-circle diffractometer'
_diffrn_measurement_device_type   'SuperNova, Dual, Cu at zero, Atlas'
_diffrn_measurement_method        '\w scans'
_diffrn_orient_matrix_type
'CrysAlisPro convention (1999,Acta A55,543-557)'
_diffrn_orient_matrix_UB_11       0.0294637000
_diffrn_orient_matrix_UB_12       -0.0324915000
_diffrn_orient_matrix_UB_13       0.0150441000
_diffrn_orient_matrix_UB_21       0.0575891000
_diffrn_orient_matrix_UB_22       0.0154010000
_diffrn_orient_matrix_UB_23       0.0413703000
_diffrn_orient_matrix_UB_31       -0.0381073000
_diffrn_orient_matrix_UB_32       -0.0020448000
_diffrn_orient_matrix_UB_33       0.0740327000
_diffrn_radiation_monochromator   mirror
_diffrn_radiation_probe           x-ray
_diffrn_radiation_type            CuK\a
_diffrn_radiation_wavelength      1.54184
_diffrn_source                    'micro-focus sealed X-ray tube'
_diffrn_source_type               'SuperNova (Cu) X-ray Source'
_reflns_Friedel_coverage          0.000
_reflns_Friedel_fraction_full     .
_reflns_Friedel_fraction_max      .
_reflns_number_gt                 4799
_reflns_number_total              6735
_reflns_odcompleteness_completeness 98.93
_reflns_odcompleteness_iscentric  1
_reflns_odcompleteness_theta      59.94
_reflns_special_details
;
 Reflections were merged by SHELXL according to the crystal
 class for the calculation of statistics and refinement.
 
 Structure factors included contributions from the .fab file.
 
 _reflns_Friedel_fraction is defined as the number of unique
 Friedel pairs measured divided by the number that would be
 possible theoretically, ignoring centric projections and
 systematic absences.
;
_reflns_threshold_expression      'I > 2\s(I)'
_computing_cell_refinement        'CrysAlisPro 1.171.38.43 (Rigaku OD, 2015)'
_computing_data_collection        'CrysAlisPro 1.171.38.43 (Rigaku OD, 2015)'
_computing_data_reduction         'CrysAlisPro 1.171.38.43 (Rigaku OD, 2015)'
_computing_molecular_graphics     'Olex2 (Dolomanov et al., 2009)'
_computing_publication_material   'Olex2 (Dolomanov et al., 2009)'
_computing_structure_refinement   'ShelXL (Sheldrick, 2015)'
_computing_structure_solution     ?
_refine_diff_density_max          1.518
_refine_diff_density_min          -2.063
_refine_diff_density_rms          0.178
_refine_ls_extinction_coef        .
_refine_ls_extinction_method      none
_refine_ls_goodness_of_fit_ref    1.545
_refine_ls_hydrogen_treatment     constr
_refine_ls_matrix_type            full
_refine_ls_number_parameters      765
_refine_ls_number_reflns          6735
_refine_ls_number_restraints      733
_refine_ls_R_factor_all           0.1492
_refine_ls_R_factor_gt            0.1298
_refine_ls_restrained_S_all       1.547
_refine_ls_shift/su_max           0.001
_refine_ls_shift/su_mean          0.000
_refine_ls_structure_factor_coef  Fsqd
_refine_ls_weighting_details
'w=1/[\s^2^(Fo^2^)+(0.2000P)^2^] where P=(Fo^2^+2Fc^2^)/3'
_refine_ls_weighting_scheme       calc
_refine_ls_wR_factor_gt           0.3497
_refine_ls_wR_factor_ref          0.3751
_refine_special_details           ?
_olex2_refinement_description
;
1. Fixed Uiso
 At 1.2 times of:
  All C(H) groups
2. Restrained distances
 C2-C3A = C3A-C4A = C4A-C5
 1.39 with sigma of 0.01
 C5-C6A = C6A-C7A = C7A-C2
 1.39 with sigma of 0.01
 C2-C4A = C3A-C5 = C4A-C6A
 2.4 with sigma of 0.01
 C5-C7A = C6A-C2 = C7A-C3A
 2.4 with sigma of 0.01
 C3A-C6A = C4A-C7A
 2.8 with sigma of 0.01
 C8-C9A = C9A-C10A = C10A-C11
 1.39 with sigma of 0.01
 C11-C12A = C12A-C13A = C13A-C8
 1.39 with sigma of 0.01
 C8-C10A = C9A-C11 = C10A-C12A
 2.4 with sigma of 0.01
 C11-C13A = C12A-C8 = C13A-C9A
 2.4 with sigma of 0.01
 C9A-C12A = C10A-C13A
 2.8 with sigma of 0.01
 C15-C16 = C19-C22 = C25-C28
 1.49 with sigma of 0.01
 C15A-C16A = C19A-C22A = C25A-C29
 1.49 with sigma of 0.01
 C15B-C16B = C19B-C22B = C25B-C29
 1.49 with sigma of 0.01
 C15C-C16C = C19C-C22C = C25C-C28
 1.49 with sigma of 0.01
 Zr3-O11 = Zr3-O9 = Zr4-O9 = Zr4-O10 = Zr4-O11
 2.14 with sigma of 0.01
 Zr4-O12 = Zr5-O9 = Zr5-O10 = Zr6-O10 = Zr6-O12
 2.14 with sigma of 0.01
 Zr4-O13 = Zr4-O14 = Zr5-O15 = Zr5-O16
 2.1 with sigma of 0.01
 O14-O15 = O13-O13_$1 = O16-O16_$1
 3.36 with sigma of 0.02
 O9-O10 = O11-O12 = O11A-O12A
 2.4 with sigma of 0.01
 O11-O11A = O12-O12A
 1.28 with sigma of 0.01
 Zr3-O11A = Zr6-O12A
 1.4 with sigma of 0.01
 C28-C29
 1.41 with sigma of 0.01
 C15-O3 = C15-O4 = C15A-O3A = C15A-O4A
 1.29 with sigma of 0.01
 C15B-O3B = C15B-O4B = C15C-O3C = C15C-O4C
 1.29 with sigma of 0.01
 Zr3-O3
 2.09 with sigma of 0.01
 Zr4-O4
 2.13 with sigma of 0.01
 Zr3_$2-O3A
 2.09 with sigma of 0.01
 O4A-Zr5_$2
 2.152 with sigma of 0.01
 O3B-Zr5_$3
 2.147 with sigma of 0.01
 O4B-Zr6_$4
 2.088 with sigma of 0.01
 O3C-Zr4_$5
 2.141 with sigma of 0.01
 O4C-Zr6_$6
 2.091 with sigma of 0.01
3. Restrained planarity
 C2, C3A, C4A, C5, C6A, C7A
 with sigma of 0.01
 C8, C9A, C10A, C11, C12A, C13A
 with sigma of 0.01
 C15B, C16B, C17B, C18B, C19B, C20B, C21B
 with sigma of 0.01
4. Rigid bond restraints
 Zr3, Zr4, Zr5, Zr6, O9, O10, O11, O12, O13, O14, O15, O16, O11A, O12A
 with sigma for 1-2 distances of 0.01 and sigma for 1-3 distances of 0.01
 O3, O4, C15, C16, C17, C18, C19, C20, C21, C22, C23, C24, C25, C26, C27, C28,
 C29
 with sigma for 1-2 distances of 0.01 and sigma for 1-3 distances of 0.01
 O3A, O4A, C15A, C16A, C17A, C18A, C19A, C20A, C21A, C22A, C23A, C24A, C25A,
 C26A, C27A
 with sigma for 1-2 distances of 0.01 and sigma for 1-3 distances of 0.01
 O3B, O4B, C15B, C16B, C17B, C18B, C19B, C20B, C21B, C22B, C23B, C24B, C25B,
 C26B, C27B
 with sigma for 1-2 distances of 0.01 and sigma for 1-3 distances of 0.01
 O3C, O4C, C15C, C16C, C17C, C18C, C19C, C20C, C21C, C22C, C23C, C24C, C25C,
 C26C, C27C
 with sigma for 1-2 distances of 0.01 and sigma for 1-3 distances of 0.01
5. Uiso/Uaniso restraints and constraints
Zr3 \\sim Zr4 \\sim Zr5 \\sim Zr6 \\sim O9 \\sim O10 \\sim O11 \\sim O12 \\sim
O13 \\sim O14 \\sim O15 \\sim O16 \\sim O11A \\sim O12A: within 2A with sigma
of 0.01 and sigma for terminal atoms of 0.02
O3 \\sim O4 \\sim C15 \\sim C16 \\sim C17 \\sim C18 \\sim C19 \\sim C20 \\sim
C21 \\sim C22 \\sim C23 \\sim C24 \\sim C25 \\sim C26 \\sim C27 \\sim C28 \\sim
C29: within 2A with sigma of 0.01 and sigma for terminal atoms of 0.02
O3A \\sim O4A \\sim C15A \\sim C16A \\sim C17A \\sim C18A \\sim C19A \\sim C20A
\\sim C21A \\sim C22A \\sim C23A \\sim C24A \\sim C25A \\sim C26A \\sim C27A:
within 2A with sigma of 0.01 and sigma for terminal atoms of 0.02
O3B \\sim O4B \\sim C15B \\sim C16B \\sim C17B \\sim C18B \\sim C19B \\sim C20B
\\sim C21B \\sim C22B \\sim C23B \\sim C24B \\sim C25B \\sim C26B \\sim C27B:
within 2A with sigma of 0.01 and sigma for terminal atoms of 0.02
O3C \\sim O4C \\sim C15C \\sim C16C \\sim C17C \\sim C18C \\sim C19C \\sim C20C
\\sim C21C \\sim C22C \\sim C23C \\sim C24C \\sim C25C \\sim C26C \\sim C27C:
within 2A with sigma of 0.01 and sigma for terminal atoms of 0.02
Uanis(O16) \\sim Ueq: with sigma of 0.01 and sigma for terminal atoms of 0.02
Uanis(C9A) \\sim Ueq, Uanis(C10) \\sim Ueq, Uanis(C12A) \\sim Ueq, Uanis(C13A)
\\sim Ueq: with sigma of 0.01 and sigma for terminal atoms of 0.02
Uanis(O13) = Uanis(O14) = Uanis(O15) = Uanis(O16)
6. Others
 Fixed Sof: Zr3(0.125) Zr4(0.25) Zr5(0.25) Zr6(0.125) O3(0.25) O4(0.25)
 O9(0.25) O10(0.25) O11(0.125) O12(0.125) O13(0.25) O14(0.25) O15(0.25)
 O16(0.25) C3(0.5) H3(0.5) C4(0.5) H4(0.5) C6(0.5) H6(0.5) C7(0.5) H7(0.5)
 C9(0.5) H9(0.5) C10(0.5) H10(0.5) C12(0.5) H12(0.5) C13(0.5) H13(0.5)
 C15(0.25) C16(0.25) C17(0.25) H17(0.25) C18(0.25) H18(0.25) C19(0.25)
 C20(0.25) H20(0.25) C21(0.25) H21(0.25) C22(0.25) C23(0.25) H23(0.25)
 C24(0.25) H24(0.25) C25(0.25) C26(0.25) H26(0.25) C27(0.25) H27(0.25)
 C28(0.25) C29(0.25) O3A(0.25) O4A(0.25) O11A(0.125) O12A(0.125) C3A(0.5)
 H3A(0.5) C4A(0.5) H4A(0.5) C6A(0.5) H6A(0.5) C7A(0.5) H7A(0.5) C9A(0.5)
 H9A(0.5) C10A(0.5) H10A(0.5) C12A(0.5) H12A(0.5) C13A(0.5) H13A(0.5)
 C15A(0.25) C16A(0.25) C17A(0.25) H17A(0.25) C18A(0.25) H18A(0.25) C19A(0.25)
 C20A(0.25) H20A(0.25) C21A(0.25) H21A(0.25) C22A(0.25) C23A(0.25) H23A(0.25)
 C24A(0.25) H24A(0.25) C25A(0.25) C26A(0.25) H26A(0.25) C27A(0.25) H27A(0.25)
 O3B(0.25) O4B(0.25) C15B(0.25) C16B(0.25) C17B(0.25) H17B(0.25) C18B(0.25)
 H18B(0.25) C19B(0.25) C20B(0.25) H20B(0.25) C21B(0.25) H21B(0.25) C22B(0.25)
 C23B(0.25) H23B(0.25) C24B(0.25) H24B(0.25) C25B(0.25) C26B(0.25) H26B(0.25)
 C27B(0.25) H27B(0.25) O3C(0.25) O4C(0.25) C15C(0.25) C16C(0.25) C17C(0.25)
 H17C(0.25) C18C(0.25) H18C(0.25) C19C(0.25) C20C(0.25) H20C(0.25) C21C(0.25)
 H21C(0.25) C22C(0.25) C23C(0.25) H23C(0.25) C24C(0.25) H24C(0.25) C25C(0.25)
 C26C(0.25) H26C(0.25) C27C(0.25) H27C(0.25)
7.a Riding coordinates:
 C24(H24), C26(H26), C24A(H24A), C26A(H26A), C24B(H24B), C26B(H26B),
 C24C(H24C), C26C(H26C)
7.b Aromatic/amide H refined with riding coordinates:
 C3(H3), C4(H4), C6(H6), C7(H7), C9(H9), C10(H10), C12(H12), C13(H13),
 C17(H17), C18(H18), C20(H20), C21(H21), C23(H23), C27(H27), C3A(H3A), C4A(H4A),
  C6A(H6A), C7A(H7A), C9A(H9A), C10A(H10A), C12A(H12A), C13A(H13A), C17A(H17A),
 C18A(H18A), C20A(H20A), C21A(H21A), C23A(H23A), C27A(H27A), C17B(H17B),
 C18B(H18B), C20B(H20B), C21B(H21B), C23B(H23B), C27B(H27B), C17C(H17C),
 C18C(H18C), C20C(H20C), C21C(H21C), C23C(H23C), C27C(H27C)
7.c Fitted hexagon refined as free rotating group:
 C2(C3,C4,C5,C6,C7), C8(C9,C10,C11,C12,C13), C16(C17,C18,C19,C20,C21), C22(C23,
 C24,C25,C26,C27), C16A(C17A,C18A,C19A,C20A,C21A), C22A(C23A,C24A,C25A,C26A,
 C27A), C16B(C17B,C18B,C19B,C20B,C21B), C22B(C23B,C24B,C25B,C26B,C27B),
 C16C(C17C,C18C,C19C,C20C,C21C), C22C(C23C,C24C,C25C,C26C,C27C)
;
_atom_sites_solution_hydrogens    mixed
_atom_sites_solution_primary      ?
_atom_sites_solution_secondary    ?
loop_
  _atom_site_label
  _atom_site_type_symbol
  _atom_site_fract_x
  _atom_site_fract_y
  _atom_site_fract_z
  _atom_site_U_iso_or_equiv
  _atom_site_adp_type
  _atom_site_occupancy
  _atom_site_site_symmetry_order
  _atom_site_calc_flag
  _atom_site_refinement_flags_posn
  _atom_site_refinement_flags_adp
  _atom_site_refinement_flags_occupancy
  _atom_site_disorder_assembly
  _atom_site_disorder_group
 Zr1 Zr 0.5000 0.44262(2) 0.5000 0.0560(5) Uani 1 4 d S T P . .
 Zr2 Zr 0.58613(5) 0.5000 0.59913(4) 0.0657(5) Uani 1 2 d S T P . .
 Zr3 Zr 0.0000 0.58199(10) -0.0324(3) 0.0969(14) Uani 0.25 2 d DS TU P . .
 Zr4 Zr -0.0869(2) 0.52500(9) -0.1340(3) 0.1110(13) Uani 0.25 1 d D U . . .
 Zr5 Zr -0.0859(2) 0.52378(9) 0.0647(2) 0.1046(12) Uani 0.25 1 d D U . . .
 Zr6 Zr 0.0000 0.46675(10) -0.0361(3) 0.0915(13) Uani 0.25 2 d DS TU P . .
 O1 O 0.4353(3) 0.41676(10) 0.4261(3) 0.0783(15) Uani 1 1 d . . . . .
 O2 O 0.3830(4) 0.45252(12) 0.3589(3) 0.104(2) Uani 1 1 d . . . . .
 O3 O -0.0635(17) 0.6067(6) -0.1032(18) 0.147(8) Uani 0.25 1 d D U . A 1
 O4 O -0.108(2) 0.5715(4) -0.173(2) 0.152(8) Uani 0.25 1 d D U . A 1
 O5 O 0.5865(5) 0.4725(2) 0.5000 0.104(3) Uani 1 2 d S T P . .
 O6 O 0.5000 0.47271(17) 0.5989(5) 0.099(3) Uani 1 2 d S T P . .
 O7 O 0.6905(5) 0.5000 0.5985(5) 0.109(3) Uani 1 2 d S T P . .
 O8 O 0.5783(6) 0.5000 0.7206(4) 0.119(4) Uani 1 2 d S T P . .
 O9 O -0.0886(6) 0.55479(19) -0.0338(6) 0.117(4) Uani 0.25 1 d D U . B 1
 O10 O -0.0762(6) 0.5000 -0.0356(5) 0.102(3) Uani 0.5 2 d DS TU P C 1
 O11 O 0.0000 0.5552(2) -0.1360(7) 0.126(5) Uani 0.25 2 d DS TU P D 1
 O12 O 0.0000 0.5000 -0.1250(7) 0.130(4) Uani 0.5 4 d DS TU P C 1
 O13 O -0.0823(5) 0.5253(8) -0.2517(6) 0.134(3) Uani 0.25 1 d D U . C 1
 O14 O -0.1887(5) 0.5279(8) -0.1380(14) 0.134(3) Uani 0.25 1 d D U . C 1
 O15 O -0.1878(5) 0.5232(7) 0.0496(14) 0.134(3) Uani 0.25 1 d D U . E 1
 O16 O -0.0818(5) 0.5726(3) 0.057(2) 0.134(3) Uani 0.25 1 d D U . B 1
 C1 C 0.4015(5) 0.42518(17) 0.3714(5) 0.084(2) Uani 1 1 d . . . . .
 C2 C 0.3810(4) 0.39989(12) 0.3184(4) 0.097(3) Uani 1 1 d D . . . .
 C3 C 0.3315(7) 0.40496(19) 0.2668(8) 0.096(9) Uani 0.5 1 d G . . F 1
 H3 H 0.3099 0.4246 0.2652 0.115 Uiso 0.5 1 calc R . . F 1
 C4 C 0.3136(7) 0.3813(2) 0.2175(8) 0.100(8) Uani 0.5 1 d G . . F 1
 H4 H 0.2798 0.3848 0.1823 0.120 Uiso 0.5 1 calc R . . F 1
 C5 C 0.3453(5) 0.35260(13) 0.2198(4) 0.106(3) Uani 1 1 d DG . . F .
 C6 C 0.3948(7) 0.34753(18) 0.2714(8) 0.089(8) Uani 0.5 1 d G . . F 1
 H6 H 0.4164 0.3279 0.2729 0.107 Uiso 0.5 1 calc R . . F 1
 C7 C 0.4126(7) 0.3712(2) 0.3206(8) 0.097(8) Uani 0.5 1 d G . . F 1
 H7 H 0.4465 0.3677 0.3559 0.116 Uiso 0.5 1 calc R . . F 1
 C8 C 0.3208(5) 0.32672(14) 0.1692(4) 0.105(3) Uani 1 1 d D . . . .
 C9 C 0.2543(4) 0.3216(2) 0.1630(7) 0.130(9) Uani 0.5 1 d G . . F 1
 H9 H 0.2245 0.3349 0.1881 0.155 Uiso 0.5 1 calc R . . F 1
 C10 C 0.2312(3) 0.2968(3) 0.1199(7) 0.130(8) Uani 0.5 1 d G U . F 1
 H10 H 0.1858 0.2933 0.1156 0.156 Uiso 0.5 1 calc R . . F 1
 C11 C 0.2748(4) 0.27732(13) 0.0830(3) 0.097(3) Uani 1 1 d DG . . F .
 C12 C 0.3413(4) 0.2825(2) 0.0893(7) 0.133(9) Uani 0.5 1 d G . . F 1
 H12 H 0.3711 0.2691 0.0641 0.160 Uiso 0.5 1 calc R . . F 1
 C13 C 0.3643(3) 0.3072(3) 0.1324(8) 0.154(12) Uani 0.5 1 d G . . F 1
 H13 H 0.4098 0.3107 0.1366 0.185 Uiso 0.5 1 calc R . . F 1
 C14 C 0.2500 0.2500 0.0378(6) 0.118(5) Uani 1 2 d S T P . .
 C15 C -0.095(3) 0.6013(5) -0.1651(19) 0.150(7) Uani 0.25 1 d D U . A 1
 C16 C -0.111(2) 0.6259(6) -0.2222(19) 0.154(7) Uani 0.25 1 d D U . A 1
 C17 C -0.0854(17) 0.6557(8) -0.2131(18) 0.154(7) Uani 0.25 1 d G U . A 1
 H17 H -0.0536 0.6596 -0.1757 0.184 Uiso 0.25 1 calc R . . A 1
 C18 C -0.1065(19) 0.6800(6) -0.259(2) 0.156(7) Uani 0.25 1 d G U . A 1
 H18 H -0.0891 0.7004 -0.2526 0.188 Uiso 0.25 1 calc R . . A 1
 C19 C -0.153(2) 0.6744(7) -0.3136(19) 0.158(7) Uani 0.25 1 d DG U . A 1
 C20 C -0.178(2) 0.6445(8) -0.323(2) 0.160(7) Uani 0.25 1 d G U . A 1
 H20 H -0.2103 0.6407 -0.3602 0.192 Uiso 0.25 1 calc R . . A 1
 C21 C -0.157(2) 0.6203(6) -0.277(2) 0.159(7) Uani 0.25 1 d G U . A 1
 H21 H -0.1748 0.5998 -0.2833 0.190 Uiso 0.25 1 calc R . . A 1
 C22 C -0.1839(19) 0.7002(7) -0.3590(19) 0.161(7) Uani 0.25 1 d D U . A 1
 C23 C -0.1423(15) 0.7171(8) -0.405(2) 0.162(7) Uani 0.25 1 d G U . A 1
 H23 H -0.0972 0.7124 -0.4060 0.194 Uiso 0.25 1 calc R . . A 1
 C24 C -0.1668(18) 0.7409(7) -0.4501(18) 0.160(7) Uani 0.25 1 d G U . A 1
 H24 H -0.1384 0.7524 -0.4817 0.192 Uiso 0.25 1 d R . . A 1
 C25 C -0.2329(19) 0.7478(7) -0.4489(17) 0.158(7) Uani 0.25 1 d DG U . A 1
 C26 C -0.2745(14) 0.7309(9) -0.403(2) 0.160(7) Uani 0.25 1 d G U . A 1
 H26 H -0.3196 0.7356 -0.4019 0.192 Uiso 0.25 1 d R . . A 1
 C27 C -0.2500(18) 0.7071(8) -0.358(2) 0.162(7) Uani 0.25 1 d G U . A 1
 H27 H -0.2784 0.6956 -0.3262 0.194 Uiso 0.25 1 calc R . . A 1
 C28 C -0.258(2) 0.7733(6) -0.5000 0.154(7) Uani 0.5 2 d DS TU P G 5
 C29 C -0.256(4) 0.7727(8) -0.5787(6) 0.151(9) Uani 0.25 1 d D U . G 5
 O3A O -0.0653(14) 0.6063(5) -0.9628(14) 0.137(7) Uani 0.25 1 d D U . H 2
 O4A O -0.105(2) 0.5691(3) -0.8860(16) 0.139(7) Uani 0.25 1 d D U . H 2
 O11A O 0.0000 0.5543(2) -0.0667(8) 0.112(4) Uani 0.25 2 d DS TU P A 2
 O12A O 0.0000 0.5000 -0.0532(9) 0.118(4) Uani 0.5 4 d DS TU P I 2
 C3A C 0.3519(9) 0.40732(18) 0.2507(7) 0.094(8) Uani 0.5 1 d D . . F 2
 H3A H 0.3442 0.4286 0.2381 0.112 Uiso 0.5 1 calc R . . F 2
 C4A C 0.3340(10) 0.3838(2) 0.2013(7) 0.120(11) Uani 0.5 1 d D . . F 2
 H4A H 0.3141 0.3890 0.1550 0.144 Uiso 0.5 1 calc R . . F 2
 C6A C 0.3746(10) 0.34521(18) 0.2878(7) 0.109(10) Uani 0.5 1 d D . . F 2
 H6A H 0.3823 0.3240 0.3006 0.131 Uiso 0.5 1 calc R . . F 2
 C7A C 0.3926(10) 0.3688(2) 0.3371(7) 0.112(10) Uani 0.5 1 d D . . F 2
 H7A H 0.4127 0.3637 0.3834 0.135 Uiso 0.5 1 calc R . . F 2
 C9A C 0.2737(6) 0.33213(19) 0.1153(7) 0.088(5) Uani 0.5 1 d D U . F 2
 H9A H 0.2573 0.3527 0.1079 0.105 Uiso 0.5 1 calc R . . F 2
 C10A C 0.2504(6) 0.3073(2) 0.0719(6) 0.124(8) Uani 0.5 1 d D . . F 2
 H10A H 0.2180 0.3109 0.0350 0.149 Uiso 0.5 1 calc R . . F 2
 C12A C 0.3216(7) 0.2720(2) 0.1373(7) 0.135(9) Uani 0.5 1 d D U . F 2
 H12A H 0.3379 0.2515 0.1451 0.162 Uiso 0.5 1 calc R . . F 2
 C13A C 0.3449(7) 0.2967(3) 0.1804(7) 0.150(10) Uani 0.5 1 d D U . F 2
 H13A H 0.3771 0.2931 0.2174 0.180 Uiso 0.5 1 calc R . . F 2
 C15A C -0.096(3) 0.5983(4) -0.903(2) 0.140(6) Uani 0.25 1 d D U . H 2
 C16A C -0.116(2) 0.6232(5) -0.8491(18) 0.144(6) Uani 0.25 1 d D U . H 2
 C17A C -0.152(2) 0.6159(5) -0.786(2) 0.147(7) Uani 0.25 1 d G U . H 2
 H17A H -0.1638 0.5948 -0.7762 0.177 Uiso 0.25 1 calc R . . H 2
 C18A C -0.171(2) 0.6395(7) -0.7373(17) 0.147(7) Uani 0.25 1 d G U . H 2
 H18A H -0.1962 0.6345 -0.6942 0.176 Uiso 0.25 1 calc R . . H 2
 C19A C -0.154(2) 0.6704(5) -0.7517(17) 0.147(6) Uani 0.25 1 d DG U . H 2
 C20A C -0.1176(19) 0.6777(4) -0.8148(18) 0.148(7) Uani 0.25 1 d G U . H 2
 H20A H -0.1058 0.6987 -0.8246 0.178 Uiso 0.25 1 calc R . . H 2
 C21A C -0.0984(19) 0.6541(6) -0.8635(16) 0.146(7) Uani 0.25 1 d G U . H 2
 H21A H -0.0734 0.6590 -0.9067 0.175 Uiso 0.25 1 calc R . . H 2
 C22A C -0.181(2) 0.6947(5) -0.6999(18) 0.142(7) Uani 0.25 1 d D U . H 2
 C23A C -0.233(2) 0.6899(5) -0.6511(19) 0.141(7) Uani 0.25 1 d G U . H 2
 H23A H -0.2513 0.6697 -0.6461 0.169 Uiso 0.25 1 calc R . . H 2
 C24A C -0.2573(16) 0.7147(7) -0.6096(17) 0.139(7) Uani 0.25 1 d G U . H 2
 H24A H -0.2926 0.7115 -0.5763 0.167 Uiso 0.25 1 d R . . H 2
 C25A C -0.2301(18) 0.7444(5) -0.6169(16) 0.139(7) Uani 0.25 1 d DG U . H 2
 C26A C -0.1783(17) 0.7491(4) -0.6657(18) 0.139(7) Uani 0.25 1 d G U . H 2
 H26A H -0.1598 0.7693 -0.6707 0.166 Uiso 0.25 1 d R . . H 2
 C27A C -0.1538(16) 0.7243(7) -0.7072(18) 0.141(7) Uani 0.25 1 d G U . H 2
 H27A H -0.1185 0.7275 -0.7405 0.169 Uiso 0.25 1 calc R . . H 2
 O3B O -0.3713(19) 0.9791(4) -0.905(2) 0.166(8) Uani 0.25 1 d D U . J 3
 O4B O -0.4301(13) 0.9440(7) -0.9679(17) 0.158(8) Uani 0.25 1 d D U . J 3
 C15B C -0.3852(19) 0.9495(5) -0.9173(19) 0.163(8) Uani 0.25 1 d D U . J 3
 C16B C -0.3679(16) 0.9224(6) -0.8666(15) 0.158(7) Uani 0.25 1 d D U . J 3
 C17B C -0.395(2) 0.8929(8) -0.8777(18) 0.158(8) Uani 0.25 1 d G U . J 3
 H17B H -0.4244 0.8896 -0.9176 0.189 Uiso 0.25 1 calc R . . J 3
 C18B C -0.378(3) 0.8684(6) -0.830(2) 0.156(8) Uani 0.25 1 d G U . J 3
 H18B H -0.3963 0.8482 -0.8381 0.187 Uiso 0.25 1 calc R . . J 3
 C19B C -0.335(2) 0.8733(6) -0.7721(17) 0.156(7) Uani 0.25 1 d DG U . J 3
 C20B C -0.3077(19) 0.9028(7) -0.7610(16) 0.156(8) Uani 0.25 1 d G U . J 3
 H20B H -0.2780 0.9062 -0.7211 0.187 Uiso 0.25 1 calc R . . J 3
 C21B C -0.3244(18) 0.9274(5) -0.8083(18) 0.158(8) Uani 0.25 1 d G U . J 3
 H21B H -0.3060 0.9475 -0.8007 0.190 Uiso 0.25 1 calc R . . J 3
 C22B C -0.323(2) 0.8481(6) -0.7150(18) 0.152(7) Uani 0.25 1 d D U . J 3
 C23B C -0.340(2) 0.8174(7) -0.7314(17) 0.152(8) Uani 0.25 1 d G U . J 3
 H23B H -0.3668 0.8130 -0.7732 0.183 Uiso 0.25 1 calc R . . J 3
 C24B C -0.317(2) 0.7931(5) -0.6867(19) 0.150(8) Uani 0.25 1 d G U . J 3
 H24B H -0.3287 0.7722 -0.6980 0.180 Uiso 0.25 1 d R . . J 3
 C25B C -0.277(2) 0.7996(5) -0.6256(18) 0.147(8) Uani 0.25 1 d DG U . J 3
 C26B C -0.260(2) 0.8303(7) -0.6092(17) 0.146(8) Uani 0.25 1 d G U . J 3
 H26B H -0.2333 0.8346 -0.5674 0.176 Uiso 0.25 1 d R . . J 3
 C27B C -0.283(2) 0.8546(5) -0.6539(18) 0.151(8) Uani 0.25 1 d G U . J 3
 H27B H -0.2714 0.8756 -0.6427 0.181 Uiso 0.25 1 calc R . . J 3
 O3C O -0.3847(19) 0.9795(3) -0.1762(15) 0.144(7) Uani 0.25 1 d D U . K 4
 O4C O -0.4334(16) 0.9446(7) -0.1083(16) 0.139(7) Uani 0.25 1 d D U . K 4
 C15C C -0.392(3) 0.9498(4) -0.1623(19) 0.144(7) Uani 0.25 1 d D U . K 4
 C16C C -0.377(2) 0.9230(6) -0.2146(15) 0.149(7) Uani 0.25 1 d D U . K 4
 C17C C -0.3296(19) 0.9287(6) -0.2682(17) 0.152(7) Uani 0.25 1 d G U . K 4
 H17C H -0.3063 0.9478 -0.2679 0.182 Uiso 0.25 1 calc R . . K 4
 C18C C -0.3161(18) 0.9062(7) -0.3223(16) 0.153(7) Uani 0.25 1 d G U . K 4
 H18C H -0.2836 0.9100 -0.3589 0.184 Uiso 0.25 1 calc R . . K 4
 C19C C -0.350(2) 0.8781(6) -0.3227(16) 0.153(7) Uani 0.25 1 d DG U . K 4
 C20C C -0.3978(19) 0.8725(6) -0.2691(19) 0.153(7) Uani 0.25 1 d G U . K 4
 H20C H -0.4211 0.8533 -0.2693 0.184 Uiso 0.25 1 calc R . . K 4
 C21C C -0.4112(18) 0.8950(7) -0.2150(17) 0.150(7) Uani 0.25 1 d G U . K 4
 H21C H -0.4437 0.8911 -0.1783 0.180 Uiso 0.25 1 calc R . . K 4
 C22C C -0.3303(19) 0.8506(6) -0.3710(17) 0.152(7) Uani 0.25 1 d D U . K 4
 C23C C -0.2637(18) 0.8448(7) -0.3707(19) 0.153(8) Uani 0.25 1 d G U . K 4
 H23C H -0.2354 0.8579 -0.3427 0.184 Uiso 0.25 1 calc R . . K 4
 C24C C -0.2386(15) 0.8199(8) -0.411(2) 0.152(8) Uani 0.25 1 d G U . K 4
 H24C H -0.1931 0.8159 -0.4111 0.182 Uiso 0.25 1 d R . . K 4
 C25C C -0.2800(19) 0.8007(6) -0.4522(17) 0.152(8) Uani 0.25 1 d DG U . K 4
 C26C C -0.3465(18) 0.8064(7) -0.4525(18) 0.153(8) Uani 0.25 1 d G U . K 4
 H26C H -0.3748 0.7933 -0.4805 0.183 Uiso 0.25 1 d R . . K 4
 C27C C -0.3717(15) 0.8314(8) -0.4119(19) 0.155(7) Uani 0.25 1 d G U . K 4
 H27C H -0.4171 0.8353 -0.4122 0.186 Uiso 0.25 1 calc R . . K 4

loop_
  _atom_site_aniso_label
  _atom_site_aniso_U_11
  _atom_site_aniso_U_22
  _atom_site_aniso_U_33
  _atom_site_aniso_U_23
  _atom_site_aniso_U_13
  _atom_site_aniso_U_12
 Zr1 0.1148(11) 0.0159(5) 0.0373(6) 0.000 0.000 0.000
 Zr2 0.1180(10) 0.0278(5) 0.0511(6) 0.000 -0.0177(4) 0.000
 Zr3 0.169(4) 0.051(2) 0.071(2) 0.0093(18) 0.000 0.000
 Zr4 0.185(4) 0.062(2) 0.086(2) 0.0115(19) -0.028(3) 0.003(2)
 Zr5 0.166(4) 0.0639(19) 0.084(2) 0.0119(18) 0.012(2) 0.0006(19)
 Zr6 0.143(4) 0.064(2) 0.068(2) 0.016(2) 0.000 0.000
 O1 0.143(5) 0.039(2) 0.053(3) -0.006(2) -0.009(3) -0.020(3)
 O2 0.179(6) 0.041(3) 0.092(4) -0.007(3) -0.050(4) -0.006(3)
 O3 0.23(2) 0.066(11) 0.147(16) 0.027(12) -0.024(15) 0.043(13)
 O4 0.229(19) 0.075(11) 0.153(17) 0.025(12) -0.020(16) 0.030(14)
 O5 0.195(10) 0.060(5) 0.058(4) 0.000 0.000 -0.051(5)
 O6 0.112(6) 0.042(4) 0.143(8) -0.051(5) 0.000 0.000
 O7 0.130(7) 0.084(6) 0.114(7) 0.000 -0.028(6) 0.000
 O8 0.248(11) 0.052(4) 0.058(4) 0.000 -0.043(6) 0.000
 O9 0.177(9) 0.063(7) 0.110(8) 0.016(7) -0.011(7) 0.014(7)
 O10 0.166(9) 0.039(6) 0.100(6) 0.000 -0.004(6) 0.000
 O11 0.177(10) 0.083(9) 0.118(12) -0.002(10) 0.000 0.000
 O12 0.165(8) 0.087(8) 0.138(10) 0.000 0.000 0.000
 O13 0.176(6) 0.109(7) 0.117(5) 0.009(6) -0.008(5) -0.002(6)
 O14 0.176(6) 0.109(7) 0.117(5) 0.009(6) -0.008(5) -0.002(6)
 O15 0.176(6) 0.109(7) 0.117(5) 0.009(6) -0.008(5) -0.002(6)
 O16 0.176(6) 0.109(7) 0.117(5) 0.009(6) -0.008(5) -0.002(6)
 C1 0.133(7) 0.042(4) 0.077(5) -0.013(4) -0.030(5) -0.004(4)
 C2 0.166(9) 0.049(4) 0.076(5) -0.013(4) -0.030(6) -0.023(5)
 C3 0.17(2) 0.034(9) 0.086(13) -0.008(9) -0.028(15) -0.026(11)
 C4 0.139(18) 0.093(19) 0.069(10) -0.025(11) -0.038(13) -0.026(14)
 C5 0.182(10) 0.050(4) 0.087(6) -0.019(4) -0.040(7) -0.014(5)
 C6 0.16(2) 0.042(11) 0.061(10) -0.014(8) 0.007(13) -0.015(11)
 C7 0.16(2) 0.067(15) 0.066(10) -0.009(10) -0.031(13) -0.017(12)
 C8 0.176(10) 0.050(4) 0.089(6) -0.015(4) -0.029(7) -0.028(5)
 C9 0.19(2) 0.080(13) 0.116(16) -0.056(13) 0.017(17) -0.051(15)
 C10 0.136(11) 0.128(11) 0.125(11) -0.024(9) 0.000(9) -0.022(9)
 C11 0.195(11) 0.045(4) 0.053(4) -0.001(3) -0.005(5) -0.052(5)
 C12 0.19(3) 0.082(14) 0.128(18) -0.053(13) 0.000(17) -0.044(16)
 C13 0.20(2) 0.14(2) 0.127(18) -0.099(17) 0.063(18) -0.088(19)
 C14 0.250(16) 0.061(7) 0.045(5) 0.000 0.000 -0.077(9)
 C15 0.230(18) 0.074(10) 0.146(15) 0.026(11) -0.020(14) 0.043(12)
 C16 0.236(17) 0.084(10) 0.141(14) 0.028(11) -0.015(13) 0.046(12)
 C17 0.236(18) 0.085(11) 0.140(15) 0.031(11) -0.009(13) 0.046(12)
 C18 0.239(17) 0.090(11) 0.140(14) 0.030(11) -0.007(13) 0.050(12)
 C19 0.241(17) 0.095(10) 0.138(13) 0.026(10) -0.008(12) 0.057(11)
 C20 0.241(17) 0.098(11) 0.140(14) 0.024(11) -0.013(13) 0.054(12)
 C21 0.240(18) 0.095(11) 0.140(15) 0.024(11) -0.016(13) 0.049(12)
 C22 0.244(17) 0.100(11) 0.138(13) 0.026(9) -0.005(11) 0.060(12)
 C23 0.246(17) 0.099(12) 0.141(14) 0.027(10) -0.002(11) 0.061(13)
 C24 0.247(17) 0.097(12) 0.137(14) 0.023(10) -0.004(11) 0.063(13)
 C25 0.248(17) 0.093(11) 0.132(13) 0.012(8) -0.004(9) 0.062(12)
 C26 0.246(17) 0.097(12) 0.137(14) 0.015(10) -0.006(11) 0.060(13)
 C27 0.243(17) 0.103(12) 0.139(14) 0.021(10) -0.006(12) 0.059(13)
 C28 0.255(18) 0.082(11) 0.125(14) 0.000 0.000 0.059(13)
 C29 0.25(2) 0.076(14) 0.124(15) -0.007(10) 0.001(10) 0.058(16)
 O3A 0.254(19) 0.055(10) 0.102(12) 0.010(9) 0.019(13) -0.006(12)
 O4A 0.26(2) 0.055(9) 0.102(14) 0.006(10) 0.023(15) -0.002(13)
 O11A 0.174(8) 0.059(7) 0.104(8) 0.005(7) 0.000 0.000
 O12A 0.161(7) 0.076(6) 0.116(7) 0.000 0.000 0.000
 C3A 0.148(18) 0.060(13) 0.074(11) 0.015(10) -0.036(14) -0.028(12)
 C4A 0.20(2) 0.050(13) 0.112(18) 0.005(12) -0.029(19) -0.032(14)
 C6A 0.21(3) 0.046(11) 0.073(13) -0.014(9) -0.032(16) -0.043(13)
 C7A 0.20(2) 0.031(10) 0.111(17) -0.013(10) 0.004(18) -0.025(12)
 C9A 0.116(9) 0.064(8) 0.083(8) -0.016(7) -0.007(8) -0.011(7)
 C10A 0.21(2) 0.089(14) 0.071(11) -0.031(10) -0.020(14) -0.049(16)
 C12A 0.161(12) 0.109(11) 0.135(12) -0.019(9) -0.019(9) -0.005(9)
 C13A 0.166(13) 0.139(13) 0.144(13) -0.017(9) -0.024(10) -0.005(9)
 C15A 0.256(18) 0.057(9) 0.107(12) 0.009(9) 0.022(12) 0.002(11)
 C16A 0.254(17) 0.059(9) 0.120(12) 0.006(9) 0.023(12) 0.012(11)
 C17A 0.254(18) 0.063(10) 0.125(13) 0.004(10) 0.027(13) 0.017(12)
 C18A 0.250(18) 0.063(9) 0.129(13) 0.002(10) 0.025(13) 0.019(12)
 C19A 0.247(17) 0.064(9) 0.131(12) 0.005(9) 0.023(12) 0.017(11)
 C20A 0.251(18) 0.065(9) 0.128(13) 0.003(10) 0.022(13) 0.016(12)
 C21A 0.253(18) 0.061(9) 0.125(13) 0.004(10) 0.020(13) 0.014(12)
 C22A 0.239(18) 0.061(9) 0.127(13) 0.007(9) 0.023(12) 0.012(11)
 C23A 0.233(19) 0.063(10) 0.127(14) 0.008(11) 0.020(13) 0.010(12)
 C24A 0.23(2) 0.063(11) 0.123(14) 0.007(11) 0.021(13) 0.007(12)
 C25A 0.23(2) 0.062(10) 0.121(14) 0.011(11) 0.024(14) 0.009(13)
 C26A 0.23(2) 0.061(10) 0.122(14) 0.012(10) 0.027(14) 0.012(13)
 C27A 0.237(19) 0.060(9) 0.127(14) 0.010(10) 0.025(13) 0.013(12)
 O3B 0.29(2) 0.096(11) 0.108(14) 0.031(12) -0.001(15) -0.009(15)
 O4B 0.30(2) 0.078(12) 0.099(13) 0.038(11) 0.003(14) -0.003(14)
 C15B 0.29(2) 0.086(10) 0.109(12) 0.033(11) 0.000(13) -0.003(13)
 C16B 0.28(2) 0.084(10) 0.107(12) 0.025(10) -0.006(13) -0.005(13)
 C17B 0.28(2) 0.083(11) 0.108(13) 0.024(11) -0.010(13) -0.004(13)
 C18B 0.28(2) 0.082(11) 0.106(12) 0.021(11) -0.016(13) -0.007(13)
 C19B 0.28(2) 0.082(10) 0.109(12) 0.017(10) -0.017(13) -0.006(13)
 C20B 0.28(2) 0.081(11) 0.108(12) 0.018(10) -0.012(13) -0.009(13)
 C21B 0.28(2) 0.084(11) 0.108(12) 0.023(11) -0.007(13) -0.007(13)
 C22B 0.27(2) 0.079(10) 0.108(12) 0.011(10) -0.022(13) -0.004(13)
 C23B 0.27(2) 0.079(11) 0.110(13) 0.011(11) -0.023(14) -0.002(14)
 C24B 0.26(2) 0.079(11) 0.108(14) 0.005(11) -0.025(15) 0.001(15)
 C25B 0.26(2) 0.075(12) 0.106(14) 0.002(12) -0.021(15) 0.003(15)
 C26B 0.26(2) 0.072(12) 0.106(14) 0.005(11) -0.018(14) 0.004(14)
 C27B 0.27(2) 0.078(11) 0.109(13) 0.007(11) -0.022(14) 0.004(14)
 O3C 0.267(19) 0.093(10) 0.070(10) 0.018(10) 0.079(13) 0.014(13)
 O4C 0.26(2) 0.078(12) 0.081(11) 0.013(10) 0.045(12) 0.010(13)
 C15C 0.259(18) 0.086(10) 0.087(10) 0.012(9) 0.058(11) 0.020(12)
 C16C 0.254(17) 0.092(10) 0.101(10) 0.005(9) 0.055(11) 0.024(11)
 C17C 0.253(18) 0.096(11) 0.106(11) 0.000(10) 0.056(12) 0.025(12)
 C18C 0.252(18) 0.099(11) 0.108(11) -0.003(10) 0.053(12) 0.028(12)
 C19C 0.246(17) 0.102(11) 0.110(11) -0.011(9) 0.050(12) 0.031(11)
 C20C 0.248(18) 0.099(11) 0.112(12) -0.006(10) 0.052(12) 0.027(12)
 C21C 0.249(18) 0.094(11) 0.108(12) -0.002(10) 0.055(12) 0.028(12)
 C22C 0.238(18) 0.106(11) 0.112(12) -0.015(10) 0.039(13) 0.041(12)
 C23C 0.239(19) 0.110(13) 0.112(13) -0.012(11) 0.030(14) 0.045(13)
 C24C 0.236(19) 0.106(14) 0.114(14) -0.010(12) 0.028(15) 0.050(13)
 C25C 0.23(2) 0.105(14) 0.116(14) -0.013(11) 0.032(15) 0.052(13)
 C26C 0.23(2) 0.105(13) 0.120(14) -0.016(11) 0.034(15) 0.050(14)
 C27C 0.236(19) 0.106(13) 0.124(13) -0.020(11) 0.035(14) 0.046(13)

_geom_special_details
;
 All esds (except the esd in the dihedral angle between two l.s. planes)
 are estimated using the full covariance matrix.  The cell esds are taken
 into account individually in the estimation of esds in distances, angles
 and torsion angles; correlations between esds in cell parameters are only
 used when they are defined by crystal symmetry.  An approximate (isotropic)
 treatment of cell esds is used for estimating esds involving l.s. planes.
;
loop_
  _geom_bond_atom_site_label_1
  _geom_bond_atom_site_label_2
  _geom_bond_distance
  _geom_bond_site_symmetry_2
  _geom_bond_publ_flag
 Zr1 Zr2 3.5061(8) 2_665 ?
 Zr1 Zr2 3.5061(8) 9_666 ?
 Zr1 Zr2 3.5061(8) 10_556 ?
 Zr1 Zr2 3.5062(8) . ?
 Zr1 O1 2.177(5) 11_655 ?
 Zr1 O1 2.177(5) . ?
 Zr1 O1 2.177(5) 10_556 ?
 Zr1 O1 2.177(5) 4_656 ?
 Zr1 O5 2.190(8) . ?
 Zr1 O5 2.190(8) 11_655 ?
 Zr1 O6 2.186(7) . ?
 Zr1 O6 2.186(7) 10_556 ?
 Zr2 Zr1 3.5062(8) 9_666 ?
 Zr2 Zr2 3.541(2) 2_665 ?
 Zr2 Zr2 3.5439(15) 10_556 ?
 Zr2 O2 2.255(5) 9_666 ?
 Zr2 O2 2.255(5) 4_656 ?
 Zr2 O5 2.127(5) 3_566 ?
 Zr2 O5 2.127(5) . ?
 Zr2 O6 2.120(4) . ?
 Zr2 O6 2.120(4) 2_665 ?
 Zr2 O7 2.146(10) . ?
 Zr2 O8 2.176(8) . ?
 Zr3 Zr3 1.158(9) 10 ?
 Zr3 Zr6 2.085(7) 2_565 ?
 Zr3 O3 2.103(10) . ?
 Zr3 O3 2.104(10) 11 ?
 Zr3 O16 1.784(14) 10 ?
 Zr3 O16 1.784(14) 4 ?
 Zr3 O3A 1.70(2) 4_554 ?
 Zr3 O3A 1.70(2) 10_554 ?
 Zr3 O3A 2.106(10) 11_556 ?
 Zr3 O11A 1.331(8) . ?
 Zr3 O4B 1.82(3) 13_464 ?
 Zr3 O4B 1.82(3) 7_564 ?
 Zr4 Zr4 2.137(8) 12_565 ?
 Zr4 Zr5 1.239(7) 10 ?
 Zr4 O10 2.069(7) . ?
 Zr4 O12 2.087(4) . ?
 Zr4 O13 2.107(10) . ?
 Zr4 O14 2.099(10) . ?
 Zr4 O4A 1.953(19) 10_554 ?
 Zr4 O3B 1.12(4) 13_464 ?
 Zr4 C15B 1.54(4) 13_464 ?
 Zr4 O3C 0.97(2) 6_465 ?
 Zr4 O4C 1.44(3) 6_465 ?
 Zr4 C15C 1.268(19) 6_465 ?
 Zr5 Zr4 1.239(7) 10 ?
 Zr5 Zr5 2.034(8) 12_565 ?
 Zr5 Zr6 1.882(5) 9_565 ?
 Zr5 O9 1.437(9) 10 ?
 Zr5 O10 2.071(7) . ?
 Zr5 O10 1.159(6) 10 ?
 Zr5 O12A 2.048(4) 9_565 ?
 Zr5 O3B 1.04(3) 6_466 ?
 Zr5 O4B 1.53(3) 6_466 ?
 Zr5 C15B 1.33(3) 6_466 ?
 Zr5 O3C 2.09(2) 13_465 ?
 Zr5 O4C 1.61(4) 13_465 ?
 Zr6 Zr3 2.085(7) 2_565 ?
 Zr6 Zr5 1.882(5) 9_565 ?
 Zr6 Zr5 1.882(5) 3_565 ?
 Zr6 Zr6 1.292(9) 10 ?
 Zr6 O9 2.042(12) 2_565 ?
 Zr6 O9 2.042(12) 12_565 ?
 Zr6 O11 2.017(13) 2_565 ?
 Zr6 O11A 2.047(15) 9_565 ?
 Zr6 O11A 1.054(12) 2_565 ?
 Zr6 O12A 1.454(4) . ?
 Zr6 O4B 1.74(3) 8_444 ?
 Zr6 O4B 1.74(3) 14_544 ?
 O1 C1 1.252(10) . ?
 O2 Zr2 2.255(5) 9_666 ?
 O2 C1 1.249(9) . ?
 O3 O16 1.72(4) 10 ?
 O3 C15 1.305(10) . ?
 O4 C15 1.303(10) . ?
 O5 Zr2 2.127(5) 10_556 ?
 O6 Zr2 2.120(4) 2_665 ?
 O9 Zr3 2.464(10) 10 ?
 O9 Zr5 1.437(9) 10 ?
 O9 Zr6 2.393(12) 9_565 ?
 O9 Zr6 2.042(12) 2_565 ?
 O9 O9 1.21(2) 10 ?
 O9 O16 0.88(2) 10 ?
 O9 O16 1.80(4) . ?
 O10 Zr4 2.069(7) 12_565 ?
 O10 Zr5 1.159(6) 3_565 ?
 O10 Zr5 1.159(6) 10 ?
 O10 Zr5 2.071(7) 12_565 ?
 O10 Zr6 2.474(9) 10 ?
 O10 Zr6 2.116(8) 2_565 ?
 O10 Zr6 2.474(9) 9_565 ?
 O10 O10 1.273(17) 10 ?
 O11 Zr4 2.204(6) 11 ?
 O11 Zr5 2.559(10) 10 ?
 O11 Zr5 2.559(10) 4 ?
 O11 Zr6 2.017(13) 2_565 ?
 O12 Zr4 2.087(4) 12_565 ?
 O12 Zr4 2.087(4) 11 ?
 O12 Zr4 2.087(4) 2_565 ?
 O12 Zr5 2.305(8) 4 ?
 O12 Zr5 2.305(8) 10 ?
 O12 Zr5 2.305(8) 9_565 ?
 O12 Zr5 2.305(8) 3_565 ?
 O12 Zr6 2.131(9) 2_565 ?
 O14 Zr5 2.493(16) 10 ?
 O14 O15 1.59(5) 10 ?
 O15 Zr4 2.567(16) 10 ?
 O15 O14 1.59(5) 10 ?
 O15 O15 1.77(5) 10 ?
 O16 Zr3 1.784(14) 10 ?
 O16 Zr4 2.46(2) 10 ?
 O16 Zr6 2.407(14) 9_565 ?
 O16 O3 1.72(4) 10 ?
 O16 O9 0.88(2) 10 ?
 C1 C2 1.499(8) . ?
 C2 C3 1.3900 . ?
 C2 C7 1.3900 . ?
 C2 C3A 1.386(8) . ?
 C2 C7A 1.391(8) . ?
 C3 C4 1.3900 . ?
 C4 C5 1.3900 . ?
 C5 C6 1.3900 . ?
 C5 C8 1.515(6) . ?
 C5 C4A 1.394(8) . ?
 C5 C6A 1.393(8) . ?
 C6 C7 1.3900 . ?
 C8 C9 1.3900 . ?
 C8 C13 1.3900 . ?
 C8 C9A 1.384(8) . ?
 C8 C13A 1.388(8) . ?
 C9 C10 1.3900 . ?
 C10 C11 1.3900 . ?
 C11 C12 1.3900 . ?
 C11 C14 1.509(7) . ?
 C11 C10A 1.392(8) . ?
 C11 C12A 1.385(8) . ?
 C12 C13 1.3900 . ?
 C14 C11 1.509(9) 6 ?
 C14 C14 1.35(2) 13 ?
 C15 C16 1.501(10) . ?
 C16 C17 1.3900 . ?
 C16 C21 1.3900 . ?
 C17 C18 1.3900 . ?
 C18 C19 1.3900 . ?
 C19 C20 1.3900 . ?
 C19 C22 1.509(10) . ?
 C20 C21 1.3900 . ?
 C22 C23 1.3900 . ?
 C22 C27 1.3900 . ?
 C23 C24 1.3900 . ?
 C24 C24 1.78(6) 10_554 ?
 C24 C25 1.3900 . ?
 C24 C26 1.91(6) 6_465 ?
 C25 C25 1.97(6) 13_464 ?
 C25 C25 1.83(6) 10_554 ?
 C25 C25 0.73(7) 6_465 ?
 C25 C26 1.24(4) 6_465 ?
 C25 C26 1.3900 . ?
 C26 C24 1.91(6) 6_465 ?
 C26 C26 1.92(8) 6_465 ?
 C26 C27 1.3900 . ?
 C28 C28 2.02(4) 13_464 ?
 C28 C29 1.408(10) 10_554 ?
 C28 C29 1.408(10) . ?
 C29 C29 1.96(5) 6_465 ?
 O3A Zr3 1.70(2) 10_554 ?
 O3A Zr3 2.106(10) 1_554 ?
 O3A O3A 1.33(5) 10_553 ?
 O3A C15A 1.290(10) . ?
 O4A Zr3 2.66(4) 10_554 ?
 O4A Zr4 1.953(19) 10_554 ?
 O4A Zr5 2.162(10) 1_554 ?
 O4A C15A 1.296(10) . ?
 O11A Zr3 2.129(13) 10 ?
 O11A Zr4 2.492(8) 11 ?
 O11A Zr5 2.197(7) 10 ?
 O11A Zr5 2.197(7) 4 ?
 O11A Zr6 1.054(12) 2_565 ?
 O11A Zr6 2.047(15) 9_565 ?
 O12A Zr4 2.532(9) 12_565 ?
 O12A Zr4 2.532(9) 2_565 ?
 O12A Zr4 2.532(9) 11 ?
 O12A Zr5 2.048(4) 3_565 ?
 O12A Zr5 2.048(4) 9_565 ?
 O12A Zr5 2.048(4) 4 ?
 O12A Zr5 2.048(4) 10 ?
 O12A Zr6 2.139(12) 10 ?
 O12A Zr6 1.454(4) 2_565 ?
 O12A Zr6 2.139(12) 9_565 ?
 C3A C4A 1.387(8) . ?
 C6A C7A 1.390(8) . ?
 C9A C10A 1.399(8) . ?
 C12A C13A 1.392(8) . ?
 C15A Zr3 2.40(4) 10_554 ?
 C15A C16A 1.492(10) . ?
 C16A C17A 1.3900 . ?
 C16A C21A 1.3900 . ?
 C17A C18A 1.3900 . ?
 C18A C19A 1.3900 . ?
 C19A C20A 1.3900 . ?
 C19A C22A 1.497(10) . ?
 C20A C21A 1.3900 . ?
 C22A C23A 1.3900 . ?
 C22A C27A 1.3900 . ?
 C23A C24A 1.3900 . ?
 C24A C25A 1.3900 . ?
 C25A C24A 1.77(4) 6_465 ?
 C25A C25A 0.95(6) 6_465 ?
 C25A C26A 1.3900 . ?
 C26A C27A 1.3900 . ?
 O3B Zr4 1.12(4) 13_464 ?
 O3B Zr4 2.25(2) 8_454 ?
 O3B Zr5 2.169(10) 15_454 ?
 O3B Zr5 1.04(3) 6_464 ?
 O3B O3B 1.78(3) 12_575 ?
 O3B C15B 1.319(10) . ?
 O4B Zr3 2.15(3) 6_464 ?
 O4B Zr3 1.82(3) 13_464 ?
 O4B Zr4 2.28(3) 13_464 ?
 O4B Zr5 1.53(3) 6_464 ?
 O4B Zr5 2.24(3) 13_464 ?
 O4B Zr6 1.74(3) 14_454 ?
 O4B Zr6 2.121(10) 5_454 ?
 O4B O4B 1.15(6) 10_553 ?
 O4B C15B 1.312(11) . ?
 C15B Zr4 1.54(4) 13_464 ?
 C15B Zr5 1.33(3) 6_464 ?
 C15B Zr6 2.61(3) 14_454 ?
 C15B C16B 1.511(10) . ?
 C16B Zr4 2.43(2) 13_464 ?
 C16B Zr5 2.775(17) 6_464 ?
 C16B C17B 1.3900 . ?
 C16B C21B 1.3900 . ?
 C17B C18B 1.3900 . ?
 C18B C19B 1.3900 . ?
 C19B C20B 1.3900 . ?
 C19B C22B 1.504(10) . ?
 C20B C21B 1.3900 . ?
 C22B C23B 1.3900 . ?
 C22B C27B 1.3900 . ?
 C23B C24B 1.3900 . ?
 C24B C25B 1.3900 . ?
 C25B C26B 1.3900 . ?
 C26B C27B 1.3900 . ?
 O3C Zr4 2.166(10) 15_455 ?
 O3C Zr4 0.97(2) 6_465 ?
 O3C Zr5 2.09(2) 13_465 ?
 O3C O3C 1.75(3) 12_575 ?
 O3C C15C 1.306(10) . ?
 O4C Zr3 2.24(3) 6_465 ?
 O4C Zr4 1.44(3) 6_465 ?
 O4C Zr5 1.61(4) 13_465 ?
 O4C Zr6 2.106(10) 5_455 ?
 O4C C15C 1.304(10) . ?
 C15C Zr4 1.268(19) 6_465 ?
 C15C Zr5 2.13(2) 13_465 ?
 C15C C16C 1.508(10) . ?
 C16C Zr4 2.750(17) 6_465 ?
 C16C C17C 1.3900 . ?
 C16C C21C 1.3900 . ?
 C17C C18C 1.3900 . ?
 C18C C19C 1.3900 . ?
 C19C C20C 1.3900 . ?
 C19C C22C 1.516(10) . ?
 C20C C21C 1.3900 . ?
 C22C C23C 1.3900 . ?
 C22C C27C 1.3900 . ?
 C23C C24C 1.3900 . ?
 C24C C25C 1.3900 . ?
 C25C C25C 1.71(6) 10_554 ?
 C25C C26C 1.3900 . ?
 C26C C27C 1.3900 . ?

loop_
  _geom_angle_atom_site_label_1
  _geom_angle_atom_site_label_2
  _geom_angle_atom_site_label_3
  _geom_angle
  _geom_angle_site_symmetry_1
  _geom_angle_site_symmetry_3
  _geom_angle_publ_flag
 Zr2 Zr1 Zr2 60.71(3) 10_556 . ?
 Zr2 Zr1 Zr2 60.71(3) 2_665 9_666 ?
 Zr2 Zr1 Zr2 60.66(3) 10_556 9_666 ?
 Zr2 Zr1 Zr2 91.19(3) 9_666 . ?
 Zr2 Zr1 Zr2 91.19(3) 2_665 10_556 ?
 Zr2 Zr1 Zr2 60.66(3) 2_665 . ?
 O1 Zr1 Zr2 74.92(14) 11_655 10_556 ?
 O1 Zr1 Zr2 166.11(14) 11_655 2_665 ?
 O1 Zr1 Zr2 110.71(16) 10_556 9_666 ?
 O1 Zr1 Zr2 166.11(14) 10_556 10_556 ?
 O1 Zr1 Zr2 110.92(13) 11_655 9_666 ?
 O1 Zr1 Zr2 74.92(14) 4_656 . ?
 O1 Zr1 Zr2 74.92(14) . 9_666 ?
 O1 Zr1 Zr2 74.92(14) 10_556 2_665 ?
 O1 Zr1 Zr2 110.92(13) 10_556 . ?
 O1 Zr1 Zr2 110.92(13) 4_656 2_665 ?
 O1 Zr1 Zr2 110.71(16) 11_655 . ?
 O1 Zr1 Zr2 110.92(13) . 10_556 ?
 O1 Zr1 Zr2 166.12(14) . . ?
 O1 Zr1 Zr2 110.71(16) 4_656 10_556 ?
 O1 Zr1 Zr2 166.11(14) 4_656 9_666 ?
 O1 Zr1 Zr2 110.71(16) . 2_665 ?
 O1 Zr1 O1 74.8(3) 4_656 11_655 ?
 O1 Zr1 O1 75.3(3) 11_655 . ?
 O1 Zr1 O1 119.0(3) 4_656 . ?
 O1 Zr1 O1 75.3(3) 4_656 10_556 ?
 O1 Zr1 O1 119.0(3) 11_655 10_556 ?
 O1 Zr1 O1 74.8(3) 10_556 . ?
 O1 Zr1 O5 142.43(14) . . ?
 O1 Zr1 O5 78.5(3) 11_655 . ?
 O1 Zr1 O5 78.5(3) 4_656 . ?
 O1 Zr1 O5 78.5(3) 10_556 11_655 ?
 O1 Zr1 O5 142.42(14) 10_556 . ?
 O1 Zr1 O5 78.5(3) . 11_655 ?
 O1 Zr1 O5 142.42(14) 4_656 11_655 ?
 O1 Zr1 O5 142.42(14) 11_655 11_655 ?
 O1 Zr1 O6 78.9(2) 4_656 . ?
 O1 Zr1 O6 78.9(2) . 10_556 ?
 O1 Zr1 O6 142.17(16) 10_556 10_556 ?
 O1 Zr1 O6 142.17(16) 11_655 . ?
 O1 Zr1 O6 78.9(2) 10_556 . ?
 O1 Zr1 O6 142.17(16) . . ?
 O1 Zr1 O6 142.17(16) 4_656 10_556 ?
 O1 Zr1 O6 78.9(2) 11_655 10_556 ?
 O5 Zr1 Zr2 90.1(2) . 9_666 ?
 O5 Zr1 Zr2 90.1(2) 11_655 . ?
 O5 Zr1 Zr2 35.08(13) . 10_556 ?
 O5 Zr1 Zr2 35.08(13) 11_655 9_666 ?
 O5 Zr1 Zr2 35.08(13) 11_655 2_665 ?
 O5 Zr1 Zr2 90.1(2) 11_655 10_556 ?
 O5 Zr1 Zr2 35.08(13) . . ?
 O5 Zr1 Zr2 90.1(2) . 2_665 ?
 O5 Zr1 O5 108.6(5) . 11_655 ?
 O6 Zr1 Zr2 34.88(12) 10_556 9_666 ?
 O6 Zr1 Zr2 34.87(12) . 2_665 ?
 O6 Zr1 Zr2 34.88(12) 10_556 10_556 ?
 O6 Zr1 Zr2 89.8(2) 10_556 2_665 ?
 O6 Zr1 Zr2 34.87(12) . . ?
 O6 Zr1 Zr2 89.8(2) . 9_666 ?
 O6 Zr1 Zr2 89.8(2) . 10_556 ?
 O6 Zr1 Zr2 89.8(2) 10_556 . ?
 O6 Zr1 O5 69.92(17) . 11_655 ?
 O6 Zr1 O5 69.92(17) . . ?
 O6 Zr1 O5 69.92(17) 10_556 . ?
 O6 Zr1 O5 69.92(17) 10_556 11_655 ?
 O6 Zr1 O6 107.9(5) . 10_556 ?
 Zr1 Zr2 Zr1 88.80(3) . 9_666 ?
 Zr1 Zr2 Zr2 59.669(17) . 2_665 ?
 Zr1 Zr2 Zr2 59.669(17) 9_666 2_665 ?
 Zr1 Zr2 Zr2 59.643(14) . 10_556 ?
 Zr1 Zr2 Zr2 59.643(14) 9_666 10_556 ?
 Zr2 Zr2 Zr2 89.999(1) 2_665 10_556 ?
 O2 Zr2 Zr1 71.36(15) 4_656 . ?
 O2 Zr2 Zr1 160.05(16) 4_656 9_666 ?
 O2 Zr2 Zr1 160.05(16) 9_666 . ?
 O2 Zr2 Zr1 71.36(15) 9_666 9_666 ?
 O2 Zr2 Zr2 109.41(16) 4_656 10_556 ?
 O2 Zr2 Zr2 109.41(16) 9_666 10_556 ?
 O2 Zr2 Zr2 106.4(2) 4_656 2_665 ?
 O2 Zr2 Zr2 106.4(2) 9_666 2_665 ?
 O2 Zr2 O2 128.4(3) 9_666 4_656 ?
 O5 Zr2 Zr1 36.3(2) . . ?
 O5 Zr2 Zr1 36.3(2) 3_566 9_666 ?
 O5 Zr2 Zr1 88.2(2) . 9_666 ?
 O5 Zr2 Zr1 88.1(2) 3_566 . ?
 O5 Zr2 Zr2 90.2(3) . 2_665 ?
 O5 Zr2 Zr2 33.57(19) . 10_556 ?
 O5 Zr2 Zr2 33.57(19) 3_566 10_556 ?
 O5 Zr2 Zr2 90.2(3) 3_566 2_665 ?
 O5 Zr2 O2 140.7(3) . 9_666 ?
 O5 Zr2 O2 77.2(3) 3_566 9_666 ?
 O5 Zr2 O2 140.7(3) 3_566 4_656 ?
 O5 Zr2 O2 77.2(3) . 4_656 ?
 O5 Zr2 O5 67.1(4) 3_566 . ?
 O5 Zr2 O7 89.5(4) 3_566 . ?
 O5 Zr2 O7 89.5(4) . . ?
 O5 Zr2 O8 146.23(19) . . ?
 O5 Zr2 O8 146.23(19) 3_566 . ?
 O6 Zr2 Zr1 87.8(2) . 9_666 ?
 O6 Zr2 Zr1 36.1(2) 2_665 9_666 ?
 O6 Zr2 Zr1 36.1(2) . . ?
 O6 Zr2 Zr1 87.8(2) 2_665 . ?
 O6 Zr2 Zr2 33.38(17) . 2_665 ?
 O6 Zr2 Zr2 89.9(3) 2_665 10_556 ?
 O6 Zr2 Zr2 89.9(3) . 10_556 ?
 O6 Zr2 Zr2 33.38(17) 2_665 2_665 ?
 O6 Zr2 O2 75.0(3) 2_665 9_666 ?
 O6 Zr2 O2 75.0(3) . 4_656 ?
 O6 Zr2 O2 137.0(3) 2_665 4_656 ?
 O6 Zr2 O2 137.0(3) . 9_666 ?
 O6 Zr2 O5 72.4(3) . . ?
 O6 Zr2 O5 72.4(3) 2_665 3_566 ?
 O6 Zr2 O5 107.8(4) . 3_566 ?
 O6 Zr2 O5 107.8(4) 2_665 . ?
 O6 Zr2 O6 66.8(3) . 2_665 ?
 O6 Zr2 O7 146.62(17) 2_665 . ?
 O6 Zr2 O7 146.62(17) . . ?
 O6 Zr2 O8 86.6(4) 2_665 . ?
 O6 Zr2 O8 86.6(4) . . ?
 O7 Zr2 Zr1 120.15(16) . . ?
 O7 Zr2 Zr1 120.15(16) . 9_666 ?
 O7 Zr2 Zr2 89.7(3) . 10_556 ?
 O7 Zr2 Zr2 179.7(3) . 2_665 ?
 O7 Zr2 O2 73.8(2) . 9_666 ?
 O7 Zr2 O2 73.8(2) . 4_656 ?
 O7 Zr2 O8 94.5(4) . . ?
 O8 Zr2 Zr1 117.83(19) . 9_666 ?
 O8 Zr2 Zr1 117.83(19) . . ?
 O8 Zr2 Zr2 85.8(3) . 2_665 ?
 O8 Zr2 Zr2 175.8(3) . 10_556 ?
 O8 Zr2 O2 71.9(2) . 9_666 ?
 O8 Zr2 O2 71.9(2) . 4_656 ?
 Zr3 Zr3 Zr6 91.84(17) 10 2_565 ?
 Zr3 Zr3 O3 127.0(11) 10 . ?
 Zr3 Zr3 O3 127.0(11) 10 11 ?
 Zr3 Zr3 O16 104.3(12) 10 4 ?
 Zr3 Zr3 O16 104.3(12) 10 10 ?
 Zr3 Zr3 O3A 53.8(9) 10 11_556 ?
 Zr3 Zr3 O3A 92.9(9) 10 10_554 ?
 Zr3 Zr3 O3A 92.9(9) 10 4_554 ?
 Zr3 Zr3 O11A 117.4(6) 10 . ?
 Zr3 Zr3 O4B 89.9(10) 10 13_464 ?
 Zr3 Zr3 O4B 89.9(10) 10 7_564 ?
 Zr6 Zr3 O3 118.9(9) 2_565 11 ?
 Zr6 Zr3 O3 118.9(9) 2_565 . ?
 Zr6 Zr3 O3A 120.9(6) 2_565 11_556 ?
 O3 Zr3 O3 77(2) . 11 ?
 O16 Zr3 Zr6 76.5(4) 10 2_565 ?
 O16 Zr3 Zr6 76.5(4) 4 2_565 ?
 O16 Zr3 O3 123.3(17) 4 . ?
 O16 Zr3 O3 51.7(13) 10 . ?
 O16 Zr3 O3 51.7(13) 4 11 ?
 O16 Zr3 O3 123.3(17) 10 11 ?
 O16 Zr3 O16 140.9(17) 10 4 ?
 O3A Zr3 Zr6 127.6(9) 10_554 2_565 ?
 O3A Zr3 Zr6 127.6(9) 4_554 2_565 ?
 O3A Zr3 O3A 104.2(19) 4_554 10_554 ?
 O3A Zr3 O3A 103.3(14) 10_554 11_556 ?
 O3A Zr3 O3A 39.1(17) 4_554 11_556 ?
 O11A Zr3 Zr6 25.5(6) . 2_565 ?
 O11A Zr3 O3A 121.4(8) . 4_554 ?
 O11A Zr3 O3A 121.4(8) . 10_554 ?
 O11A Zr3 O3A 135.3(8) . 11_556 ?
 O4B Zr3 Zr6 52.3(8) 13_464 2_565 ?
 O4B Zr3 Zr6 52.3(8) 7_564 2_565 ?
 O4B Zr3 O4B 104.5(16) 13_464 7_564 ?
 Zr5 Zr4 Zr4 87.6(2) 10 12_565 ?
 Zr5 Zr4 O10 29.3(2) 10 . ?
 Zr5 Zr4 O12 83.6(4) 10 . ?
 Zr5 Zr4 O13 176.0(7) 10 . ?
 Zr5 Zr4 O14 93.0(8) 10 . ?
 Zr5 Zr4 O4A 82.0(8) 10 10_554 ?
 Zr5 Zr4 C15B 56.0(8) 10 13_464 ?
 Zr5 Zr4 O4C 73.4(12) 10 6_465 ?
 Zr5 Zr4 C15C 116.1(18) 10 6_465 ?
 O10 Zr4 Zr4 58.90(16) . 12_565 ?
 O10 Zr4 O12 65.1(5) . . ?
 O10 Zr4 O13 147.9(10) . . ?
 O10 Zr4 O14 99.5(8) . . ?
 O12 Zr4 Zr4 59.20(11) . 12_565 ?
 O12 Zr4 O13 92.4(7) . . ?
 O12 Zr4 O14 152.4(9) . . ?
 O13 Zr4 Zr4 90.3(10) . 12_565 ?
 O14 Zr4 Zr4 93.4(9) . 12_565 ?
 O14 Zr4 O13 90.6(8) . . ?
 O4A Zr4 Zr4 164.9(13) 10_554 12_565 ?
 O3B Zr4 Zr4 80.9(9) 13_464 12_565 ?
 O3B Zr4 Zr5 51.9(16) 13_464 10 ?
 O3B Zr4 C15B 56.9(15) 13_464 13_464 ?
 C15B Zr4 Zr4 135.3(11) 13_464 12_565 ?
 O3C Zr4 Zr4 78.5(7) 6_465 12_565 ?
 O3C Zr4 Zr5 141(2) 6_465 10 ?
 O3C Zr4 O4C 126.9(9) 6_465 6_465 ?
 O3C Zr4 C15C 69.9(8) 6_465 6_465 ?
 O4C Zr4 Zr4 154.5(4) 6_465 12_565 ?
 C15C Zr4 Zr4 148.4(9) 6_465 12_565 ?
 C15C Zr4 O4C 57.1(9) 6_465 6_465 ?
 Zr4 Zr5 Zr5 92.4(2) 10 12_565 ?
 Zr4 Zr5 Zr6 106.1(4) 10 9_565 ?
 Zr4 Zr5 O9 110.2(5) 10 10 ?
 Zr4 Zr5 O10 152.5(3) 10 . ?
 Zr4 Zr5 O12A 97.7(5) 10 9_565 ?
 Zr4 Zr5 O4B 110.2(11) 10 6_466 ?
 Zr4 Zr5 C15B 73.4(17) 10 6_466 ?
 Zr4 Zr5 O3C 17.2(11) 10 13_465 ?
 Zr4 Zr5 O4C 59.1(10) 10 13_465 ?
 Zr5 Zr5 O10 60.60(16) 12_565 . ?
 Zr5 Zr5 O12A 60.23(12) 12_565 9_565 ?
 Zr5 Zr5 O3C 86.1(4) 12_565 13_465 ?
 Zr6 Zr5 Zr5 102.4(2) 9_565 12_565 ?
 Zr6 Zr5 O10 77.3(4) 9_565 . ?
 Zr6 Zr5 O12A 43.17(18) 9_565 9_565 ?
 Zr6 Zr5 O3C 123.1(12) 9_565 13_465 ?
 O9 Zr5 Zr5 157.2(4) 10 12_565 ?
 O9 Zr5 Zr6 74.6(5) 10 9_565 ?
 O9 Zr5 O10 97.1(5) 10 . ?
 O10 Zr5 Zr4 119.2(5) 10 10 ?
 O10 Zr5 Zr5 28.7(5) 10 12_565 ?
 O10 Zr5 Zr6 84.6(6) 10 9_565 ?
 O10 Zr5 O9 130.0(7) 10 10 ?
 O10 Zr5 O10 33.3(5) 10 . ?
 O3B Zr5 Zr4 58(2) 6_466 10 ?
 O3B Zr5 Zr5 83.1(9) 6_466 12_565 ?
 O3B Zr5 Zr6 164(2) 6_466 9_565 ?
 O3B Zr5 O4B 119.2(11) 6_466 6_466 ?
 O3B Zr5 C15B 66.4(9) 6_466 6_466 ?
 O4B Zr5 Zr5 154.1(5) 6_466 12_565 ?
 O4B Zr5 Zr6 60.1(9) 6_466 9_565 ?
 C15B Zr5 Zr5 149.4(11) 6_466 12_565 ?
 C15B Zr5 Zr6 107.5(13) 6_466 9_565 ?
 C15B Zr5 O4B 54.1(9) 6_466 6_466 ?
 O4C Zr5 Zr5 147.1(12) 13_465 12_565 ?
 O4C Zr5 Zr6 73.7(8) 13_465 9_565 ?
 O4C Zr5 O3C 70.5(10) 13_465 13_465 ?
 Zr5 Zr6 Zr3 102.9(2) 3_565 2_565 ?
 Zr5 Zr6 Zr3 102.9(2) 9_565 2_565 ?
 Zr5 Zr6 Zr5 139.5(4) 3_565 9_565 ?
 Zr5 Zr6 O9 42.7(3) 9_565 2_565 ?
 Zr5 Zr6 O9 42.7(3) 3_565 12_565 ?
 Zr5 Zr6 O9 160.0(4) 3_565 2_565 ?
 Zr5 Zr6 O9 160.0(4) 9_565 12_565 ?
 Zr5 Zr6 O11 81.9(2) 9_565 2_565 ?
 Zr5 Zr6 O11 81.9(2) 3_565 2_565 ?
 Zr5 Zr6 O11A 109.77(19) 9_565 9_565 ?
 Zr5 Zr6 O11A 109.77(19) 3_565 9_565 ?
 Zr6 Zr6 Zr3 88.17(17) 10 2_565 ?
 Zr6 Zr6 Zr5 105.7(2) 10 9_565 ?
 Zr6 Zr6 Zr5 105.7(2) 10 3_565 ?
 Zr6 Zr6 O9 88.8(3) 10 2_565 ?
 Zr6 Zr6 O9 88.8(3) 10 12_565 ?
 Zr6 Zr6 O11 152.3(3) 10 2_565 ?
 Zr6 Zr6 O11A 26.1(3) 10 9_565 ?
 Zr6 Zr6 O12A 102.1(6) 10 . ?
 Zr6 Zr6 O4B 87.6(10) 10 14_544 ?
 Zr6 Zr6 O4B 87.6(10) 10 8_444 ?
 O9 Zr6 Zr3 63.2(3) 12_565 2_565 ?
 O9 Zr6 Zr3 63.2(3) 2_565 2_565 ?
 O9 Zr6 O9 126.3(5) 12_565 2_565 ?
 O11 Zr6 Zr3 64.1(3) 2_565 2_565 ?
 O11 Zr6 O9 79.0(3) 2_565 2_565 ?
 O11 Zr6 O9 79.0(3) 2_565 12_565 ?
 O11A Zr6 Zr3 33.0(7) 2_565 2_565 ?
 O11A Zr6 Zr3 62.0(3) 9_565 2_565 ?
 O11A Zr6 Zr5 92.5(3) 2_565 3_565 ?
 O11A Zr6 Zr5 92.5(3) 2_565 9_565 ?
 O11A Zr6 Zr6 121.2(7) 2_565 10 ?
 O11A Zr6 O11A 95.0(9) 2_565 9_565 ?
 O11A Zr6 O12A 136.7(9) 2_565 . ?
 O12A Zr6 Zr3 169.7(6) . 2_565 ?
 O12A Zr6 Zr5 74.5(2) . 3_565 ?
 O12A Zr6 Zr5 74.5(2) . 9_565 ?
 O12A Zr6 O11A 128.3(7) . 9_565 ?
 O4B Zr6 Zr3 55.9(10) 14_544 2_565 ?
 O4B Zr6 Zr3 55.9(10) 8_444 2_565 ?
 O4B Zr6 Zr5 155.2(11) 8_444 9_565 ?
 O4B Zr6 Zr5 49.8(10) 8_444 3_565 ?
 O4B Zr6 Zr5 155.2(11) 14_544 3_565 ?
 O4B Zr6 Zr5 49.8(10) 14_544 9_565 ?
 O4B Zr6 O4B 112(2) 8_444 14_544 ?
 C1 O1 Zr1 131.8(5) . . ?
 C1 O2 Zr2 134.2(5) . 9_666 ?
 O16 O3 Zr3 54.5(7) 10 . ?
 C15 O3 Zr3 137(2) . . ?
 C15 O3 O16 98(2) . 10 ?
 C15 O4 Zr4 146(2) . . ?
 Zr2 O5 Zr1 108.6(3) . . ?
 Zr2 O5 Zr1 108.6(3) 10_556 . ?
 Zr2 O5 Zr2 112.9(4) 10_556 . ?
 Zr2 O6 Zr1 109.0(3) 2_665 . ?
 Zr2 O6 Zr1 109.0(3) . . ?
 Zr2 O6 Zr2 113.2(3) 2_665 . ?
 Zr3 O9 Zr3 28.0(2) . 10 ?
 Zr3 O9 Zr4 107.9(5) . . ?
 Zr3 O9 Zr5 107.0(5) . . ?
 Zr3 O9 Zr6 63.9(4) . 9_565 ?
 Zr4 O9 Zr3 130.7(6) . 10 ?
 Zr4 O9 Zr5 107.6(4) . . ?
 Zr4 O9 Zr6 100.9(5) . 9_565 ?
 Zr5 O9 Zr3 83.2(4) . 10 ?
 Zr5 O9 Zr3 117.9(8) 10 . ?
 Zr5 O9 Zr3 126.2(7) 10 10 ?
 Zr5 O9 Zr4 31.9(3) 10 . ?
 Zr5 O9 Zr5 75.6(5) 10 . ?
 Zr5 O9 Zr6 79.4(5) 10 9_565 ?
 Zr5 O9 Zr6 62.7(5) 10 2_565 ?
 Zr5 O9 Zr6 48.1(3) . 9_565 ?
 Zr5 O9 O16 137.2(9) 10 . ?
 Zr6 O9 Zr3 64.1(4) 2_565 10 ?
 Zr6 O9 Zr3 50.8(3) 9_565 10 ?
 Zr6 O9 Zr3 59.4(4) 2_565 . ?
 Zr6 O9 Zr4 73.0(4) 2_565 . ?
 Zr6 O9 Zr5 73.9(4) 2_565 . ?
 Zr6 O9 Zr6 32.7(3) 2_565 9_565 ?
 O9 O9 Zr3 61.3(3) 10 10 ?
 O9 O9 Zr3 89.4(3) 10 . ?
 O9 O9 Zr4 144.6(2) 10 . ?
 O9 O9 Zr5 112.6(4) 10 10 ?
 O9 O9 Zr5 37.0(2) 10 . ?
 O9 O9 Zr6 91.2(3) 10 2_565 ?
 O9 O9 Zr6 58.5(3) 10 9_565 ?
 O9 O9 O16 25.5(6) 10 . ?
 O16 O9 Zr3 72.3(6) . . ?
 O16 O9 Zr3 53.4(13) 10 . ?
 O16 O9 Zr3 72.6(18) 10 10 ?
 O16 O9 Zr3 46.3(5) . 10 ?
 O16 O9 Zr4 168.3(8) . . ?
 O16 O9 Zr4 96(2) 10 . ?
 O16 O9 Zr5 154(2) 10 . ?
 O16 O9 Zr5 62.0(6) . . ?
 O16 O9 Zr5 128(2) 10 10 ?
 O16 O9 Zr6 98.0(6) . 2_565 ?
 O16 O9 Zr6 117.3(15) 10 9_565 ?
 O16 O9 Zr6 103.7(12) 10 2_565 ?
 O16 O9 Zr6 68.4(5) . 9_565 ?
 O16 O9 O9 118(2) 10 10 ?
 O16 O9 O16 93(3) 10 . ?
 Zr4 O10 Zr4 62.2(3) 12_565 . ?
 Zr4 O10 Zr5 168.3(7) . 12_565 ?
 Zr4 O10 Zr5 118.16(18) 12_565 12_565 ?
 Zr4 O10 Zr5 118.17(18) . . ?
 Zr4 O10 Zr5 168.3(7) 12_565 . ?
 Zr4 O10 Zr6 143.5(5) . 10 ?
 Zr4 O10 Zr6 143.5(5) 12_565 9_565 ?
 Zr4 O10 Zr6 102.2(3) 12_565 10 ?
 Zr4 O10 Zr6 114.9(5) 12_565 2_565 ?
 Zr4 O10 Zr6 102.2(3) . 9_565 ?
 Zr4 O10 Zr6 74.2(3) . 2_565 ?
 Zr4 O10 Zr6 114.9(5) . . ?
 Zr4 O10 Zr6 74.2(3) 12_565 . ?
 Zr5 O10 Zr4 93.1(6) 3_565 . ?
 Zr5 O10 Zr4 31.5(4) 3_565 12_565 ?
 Zr5 O10 Zr4 31.5(4) 10 . ?
 Zr5 O10 Zr4 93.1(6) 10 12_565 ?
 Zr5 O10 Zr5 122.6(9) 3_565 10 ?
 Zr5 O10 Zr5 143.4(7) 3_565 . ?
 Zr5 O10 Zr5 86.6(4) 10 . ?
 Zr5 O10 Zr5 86.6(4) 3_565 12_565 ?
 Zr5 O10 Zr5 58.8(3) . 12_565 ?
 Zr5 O10 Zr5 143.4(7) 10 12_565 ?
 Zr5 O10 Zr6 135.6(8) 10 . ?
 Zr5 O10 Zr6 47.9(2) 12_565 10 ?
 Zr5 O10 Zr6 62.3(4) 10 2_565 ?
 Zr5 O10 Zr6 83.9(3) 12_565 9_565 ?
 Zr5 O10 Zr6 75.2(3) . 2_565 ?
 Zr5 O10 Zr6 147.7(8) 10 10 ?
 Zr5 O10 Zr6 47.9(2) . 9_565 ?
 Zr5 O10 Zr6 62.3(4) 3_565 . ?
 Zr5 O10 Zr6 80.6(4) 3_565 10 ?
 Zr5 O10 Zr6 113.9(5) . . ?
 Zr5 O10 Zr6 135.6(8) 3_565 2_565 ?
 Zr5 O10 Zr6 75.2(3) 12_565 . ?
 Zr5 O10 Zr6 83.9(3) . 10 ?
 Zr5 O10 Zr6 147.7(8) 3_565 9_565 ?
 Zr5 O10 Zr6 80.6(4) 10 9_565 ?
 Zr5 O10 Zr6 113.9(5) 12_565 2_565 ?
 Zr5 O10 O10 116.7(5) 3_565 10 ?
 Zr5 O10 O10 116.7(5) 10 10 ?
 Zr6 O10 Zr6 85.4(4) 2_565 10 ?
 Zr6 O10 Zr6 31.5(2) . 10 ?
 Zr6 O10 Zr6 31.5(2) 2_565 9_565 ?
 Zr6 O10 Zr6 85.4(4) . 9_565 ?
 Zr6 O10 Zr6 70.1(3) 9_565 10 ?
 Zr6 O10 Zr6 84.4(5) 2_565 . ?
 O10 O10 Zr4 148.18(17) 10 12_565 ?
 O10 O10 Zr4 148.18(17) 10 . ?
 O10 O10 Zr5 30.02(16) 10 12_565 ?
 O10 O10 Zr5 30.02(16) 10 . ?
 O10 O10 Zr6 90.3(3) 10 2_565 ?
 O10 O10 Zr6 58.8(2) 10 9_565 ?
 O10 O10 Zr6 90.3(3) 10 . ?
 O10 O10 Zr6 58.8(2) 10 10 ?
 Zr3 O11 Zr4 107.1(4) . . ?
 Zr3 O11 Zr4 107.1(4) . 11 ?
 Zr3 O11 Zr5 81.5(4) . 4 ?
 Zr3 O11 Zr5 81.5(4) . 10 ?
 Zr4 O11 Zr4 108.2(4) 11 . ?
 Zr4 O11 Zr5 104.1(4) 11 10 ?
 Zr4 O11 Zr5 104.1(4) . 4 ?
 Zr4 O11 Zr5 28.95(19) 11 4 ?
 Zr4 O11 Zr5 28.95(19) . 10 ?
 Zr5 O11 Zr5 87.3(4) 10 4 ?
 Zr6 O11 Zr3 59.5(4) 2_565 . ?
 Zr6 O11 Zr4 73.3(3) 2_565 11 ?
 Zr6 O11 Zr4 73.3(3) 2_565 . ?
 Zr6 O11 Zr5 46.7(2) 2_565 10 ?
 Zr6 O11 Zr5 46.7(2) 2_565 4 ?
 Zr4 O12 Zr4 171.1(8) . 2_565 ?
 Zr4 O12 Zr4 171.2(8) 12_565 11 ?
 Zr4 O12 Zr4 117.6(2) 12_565 2_565 ?
 Zr4 O12 Zr4 117.6(2) . 11 ?
 Zr4 O12 Zr4 61.6(2) . 12_565 ?
 Zr4 O12 Zr4 61.6(2) 11 2_565 ?
 Zr4 O12 Zr5 66.83(18) 12_565 10 ?
 Zr4 O12 Zr5 32.29(19) 12_565 3_565 ?
 Zr4 O12 Zr5 66.83(18) 11 9_565 ?
 Zr4 O12 Zr5 156.6(7) 2_565 10 ?
 Zr4 O12 Zr5 117.7(3) 2_565 3_565 ?
 Zr4 O12 Zr5 32.29(19) 11 4 ?
 Zr4 O12 Zr5 66.83(18) . 3_565 ?
 Zr4 O12 Zr5 66.83(18) 2_565 4 ?
 Zr4 O12 Zr5 156.6(7) 11 3_565 ?
 Zr4 O12 Zr5 156.6(7) . 9_565 ?
 Zr4 O12 Zr5 32.29(19) . 10 ?
 Zr4 O12 Zr5 117.7(3) 12_565 9_565 ?
 Zr4 O12 Zr5 117.7(3) 11 10 ?
 Zr4 O12 Zr5 117.8(3) . 4 ?
 Zr4 O12 Zr5 156.6(7) 12_565 4 ?
 Zr4 O12 Zr5 32.29(19) 2_565 9_565 ?
 Zr4 O12 Zr6 73.5(2) 12_565 . ?
 Zr4 O12 Zr6 73.5(2) 11 2_565 ?
 Zr4 O12 Zr6 113.5(4) . . ?
 Zr4 O12 Zr6 113.5(4) 11 . ?
 Zr4 O12 Zr6 113.5(4) 2_565 2_565 ?
 Zr4 O12 Zr6 73.5(2) 2_565 . ?
 Zr4 O12 Zr6 73.5(2) . 2_565 ?
 Zr4 O12 Zr6 113.5(4) 12_565 2_565 ?
 Zr5 O12 Zr5 52.4(3) 4 9_565 ?
 Zr5 O12 Zr5 124.3(6) 9_565 10 ?
 Zr5 O12 Zr5 100.0(4) 9_565 3_565 ?
 Zr5 O12 Zr5 100.0(4) 4 10 ?
 Zr5 O12 Zr5 52.4(3) 3_565 10 ?
 Zr5 O12 Zr5 124.3(6) 4 3_565 ?
 Zr6 O12 Zr5 50.0(2) 2_565 4 ?
 Zr6 O12 Zr5 50.0(2) . 9_565 ?
 Zr6 O12 Zr5 50.0(2) . 3_565 ?
 Zr6 O12 Zr5 86.9(4) 2_565 9_565 ?
 Zr6 O12 Zr5 86.9(4) 2_565 3_565 ?
 Zr6 O12 Zr5 50.0(2) 2_565 10 ?
 Zr6 O12 Zr5 86.9(4) . 10 ?
 Zr6 O12 Zr5 86.9(4) . 4 ?
 Zr6 O12 Zr6 83.7(5) 2_565 . ?
 Zr4 O14 Zr5 29.8(3) . 10 ?
 O15 O14 Zr4 86.9(9) 10 . ?
 O15 O14 Zr5 57.3(7) 10 10 ?
 Zr5 O15 Zr4 28.7(3) . 10 ?
 O14 O15 Zr4 54.7(6) 10 10 ?
 O14 O15 Zr5 83.3(8) 10 . ?
 O14 O15 O15 172.7(16) 10 10 ?
 O15 O15 Zr4 126.0(5) 10 10 ?
 O15 O15 Zr5 97.4(7) 10 . ?
 Zr3 O16 Zr3 28.5(6) 10 . ?
 Zr3 O16 Zr4 111.4(7) 10 10 ?
 Zr3 O16 Zr4 123.5(5) . 10 ?
 Zr3 O16 Zr5 106.2(6) 10 . ?
 Zr3 O16 Zr6 61.0(5) . 9_565 ?
 Zr3 O16 Zr6 57.4(4) 10 9_565 ?
 Zr3 O16 O9 86.9(15) 10 . ?
 Zr5 O16 Zr3 104.1(10) . . ?
 Zr5 O16 Zr4 30.3(4) . 10 ?
 Zr5 O16 Zr6 48.9(3) . 9_565 ?
 Zr6 O16 Zr4 62.5(3) 9_565 10 ?
 O3 O16 Zr3 91.4(9) 10 . ?
 O3 O16 Zr3 73.8(9) 10 10 ?
 O3 O16 Zr4 116(2) 10 10 ?
 O3 O16 Zr5 146(2) 10 . ?
 O3 O16 Zr6 121.0(14) 10 9_565 ?
 O3 O16 O9 144(2) 10 . ?
 O9 O16 Zr3 87(2) 10 . ?
 O9 O16 Zr3 61.0(11) . . ?
 O9 O16 Zr3 103(2) 10 10 ?
 O9 O16 Zr4 62.7(16) 10 10 ?
 O9 O16 Zr4 98.7(6) . 10 ?
 O9 O16 Zr5 68.6(7) . . ?
 O9 O16 Zr5 33.0(13) 10 . ?
 O9 O16 Zr6 55.5(10) 10 9_565 ?
 O9 O16 Zr6 67.6(8) . 9_565 ?
 O9 O16 O3 176.5(18) 10 10 ?
 O9 O16 O9 36.2(19) 10 . ?
 O1 C1 C2 116.2(6) . . ?
 O2 C1 O1 125.3(7) . . ?
 O2 C1 C2 118.5(7) . . ?
 C3 C2 C1 120.8(6) . . ?
 C3 C2 C7 120.0 . . ?
 C7 C2 C1 119.2(6) . . ?
 C3A C2 C1 120.5(6) . . ?
 C3A C2 C7A 120.2(4) . . ?
 C7A C2 C1 119.3(6) . . ?
 C2 C3 C4 120.0 . . ?
 C5 C4 C3 120.0 . . ?
 C4 C5 C6 120.0 . . ?
 C4 C5 C8 118.2(6) . . ?
 C6 C5 C8 121.7(6) . . ?
 C4A C5 C8 120.1(6) . . ?
 C6A C5 C8 119.9(6) . . ?
 C6A C5 C4A 119.7(4) . . ?
 C7 C6 C5 120.0 . . ?
 C6 C7 C2 120.0 . . ?
 C9 C8 C5 119.4(7) . . ?
 C9 C8 C13 120.0 . . ?
 C13 C8 C5 120.5(7) . . ?
 C9A C8 C5 121.7(6) . . ?
 C9A C8 C13A 120.2(4) . . ?
 C13A C8 C5 118.0(7) . . ?
 C8 C9 C10 120.0 . . ?
 C9 C10 C11 120.0 . . ?
 C10 C11 C14 120.1(6) . . ?
 C12 C11 C10 120.0 . . ?
 C12 C11 C14 119.9(6) . . ?
 C10A C11 C14 121.0(6) . . ?
 C12A C11 C14 119.0(6) . . ?
 C12A C11 C10A 120.0(4) . . ?
 C11 C12 C13 120.0 . . ?
 C12 C13 C8 120.0 . . ?
 C11 C14 C11 115.1(10) 6 . ?
 C14 C14 C11 122.4(6) 13 6 ?
 C14 C14 C11 122.4(4) 13 . ?
 O3 C15 C16 124(2) . . ?
 O4 C15 O3 111(2) . . ?
 O4 C15 C16 125(2) . . ?
 C17 C16 C15 119(3) . . ?
 C17 C16 C21 120.0 . . ?
 C21 C16 C15 120(3) . . ?
 C18 C17 C16 120.0 . . ?
 C17 C18 C19 120.0 . . ?
 C18 C19 C20 120.0 . . ?
 C18 C19 C22 123(3) . . ?
 C20 C19 C22 117(3) . . ?
 C21 C20 C19 120.0 . . ?
 C20 C21 C16 120.0 . . ?
 C23 C22 C19 116(3) . . ?
 C23 C22 C27 120.0 . . ?
 C27 C22 C19 124(3) . . ?
 C22 C23 C24 120.0 . . ?
 C23 C24 C24 125.3 . 10_554 ?
 C23 C24 C26 115.9(5) . 6_465 ?
 C24 C24 C26 116.4(8) 10_554 6_465 ?
 C25 C24 C23 120.0 . . ?
 C25 C24 C24 90.9 . 10_554 ?
 C25 C24 C26 41(3) . 6_465 ?
 C24 C25 C25 89.1 . 10_554 ?
 C24 C25 C25 111(4) . 13_464 ?
 C24 C25 C26 120.0 . . ?
 C25 C25 C24 177(7) 6_465 . ?
 C25 C25 C25 22(4) 10_554 13_464 ?
 C25 C25 C25 90.0 6_465 10_554 ?
 C25 C25 C25 68(4) 6_465 13_464 ?
 C25 C25 C26 63(5) 6_465 . ?
 C25 C25 C26 86(3) 6_465 6_465 ?
 C26 C25 C24 93(5) 6_465 . ?
 C26 C25 C25 112(4) . 13_464 ?
 C26 C25 C25 126.4 . 10_554 ?
 C26 C25 C25 131.7(16) 6_465 10_554 ?
 C26 C25 C25 126(4) 6_465 13_464 ?
 C26 C25 C26 94(4) 6_465 . ?
 C24 C26 C26 78(3) 6_465 6_465 ?
 C25 C26 C24 78(3) . 6_465 ?
 C25 C26 C26 40.1(9) . 6_465 ?
 C25 C26 C27 120.0 . . ?
 C27 C26 C24 162(3) . 6_465 ?
 C27 C26 C26 115.7(18) . 6_465 ?
 C26 C27 C22 120.0 . . ?
 C29 C28 C28 88.7(12) 10_554 13_464 ?
 C29 C28 C28 88.7(12) . 13_464 ?
 C29 C28 C29 176(5) . 10_554 ?
 C28 C29 C29 91.3(14) . 6_465 ?
 Zr3 O3A Zr3 33.3(4) 10_554 1_554 ?
 O3A O3A Zr3 87.1(9) 10_553 10_554 ?
 O3A O3A Zr3 53.8(9) 10_553 1_554 ?
 C15A O3A Zr3 132(2) . 1_554 ?
 C15A O3A Zr3 106(3) . 10_554 ?
 C15A O3A O3A 146(4) . 10_553 ?
 Zr4 O4A Zr3 98.6(13) 10_554 10_554 ?
 Zr4 O4A Zr5 34.6(3) 10_554 1_554 ?
 Zr5 O4A Zr3 79.6(9) 1_554 10_554 ?
 C15A O4A Zr3 64(2) . 10_554 ?
 C15A O4A Zr4 162(4) . 10_554 ?
 C15A O4A Zr5 138.0(18) . 1_554 ?
 Zr3 O11A Zr3 28.9(4) . 10 ?
 Zr3 O11A Zr4 132.9(3) 10 11 ?
 Zr3 O11A Zr4 132.9(3) 10 . ?
 Zr3 O11A Zr4 132.0(2) . . ?
 Zr3 O11A Zr4 132.0(2) . 11 ?
 Zr3 O11A Zr5 121.4(4) . 4 ?
 Zr3 O11A Zr5 108.5(5) 10 10 ?
 Zr3 O11A Zr5 108.5(5) 10 4 ?
 Zr3 O11A Zr5 121.4(4) . 10 ?
 Zr3 O11A Zr6 88.8(7) . 9_565 ?
 Zr4 O11A Zr4 91.5(4) 11 . ?
 Zr5 O11A Zr4 29.8(2) 4 11 ?
 Zr5 O11A Zr4 29.8(2) 10 . ?
 Zr5 O11A Zr4 106.5(4) 4 . ?
 Zr5 O11A Zr4 106.5(4) 10 11 ?
 Zr5 O11A Zr5 107.0(4) 10 4 ?
 Zr6 O11A Zr3 59.9(5) 9_565 10 ?
 Zr6 O11A Zr3 92.6(10) 2_565 10 ?
 Zr6 O11A Zr3 121.5(12) 2_565 . ?
 Zr6 O11A Zr4 102.2(3) 9_565 11 ?
 Zr6 O11A Zr4 79.6(4) 2_565 . ?
 Zr6 O11A Zr4 102.2(3) 9_565 . ?
 Zr6 O11A Zr4 79.6(4) 2_565 11 ?
 Zr6 O11A Zr5 58.9(3) 2_565 4 ?
 Zr6 O11A Zr5 74.0(4) 9_565 4 ?
 Zr6 O11A Zr5 74.0(4) 9_565 10 ?
 Zr6 O11A Zr5 58.9(3) 2_565 10 ?
 Zr6 O11A Zr6 32.7(5) 2_565 9_565 ?
 Zr4 O12A Zr4 89.7(4) 12_565 2_565 ?
 Zr4 O12A Zr4 89.7(4) . 11 ?
 Zr4 O12A Zr4 110.5(6) . 2_565 ?
 Zr4 O12A Zr4 49.9(3) . 12_565 ?
 Zr4 O12A Zr4 49.9(3) 11 2_565 ?
 Zr4 O12A Zr4 110.5(6) 12_565 11 ?
 Zr5 O12A Zr4 139.5(7) 10 2_565 ?
 Zr5 O12A Zr4 29.0(2) 4 11 ?
 Zr5 O12A Zr4 62.9(3) 9_565 11 ?
 Zr5 O12A Zr4 62.9(3) 3_565 . ?
 Zr5 O12A Zr4 110.0(4) 10 11 ?
 Zr5 O12A Zr4 29.0(2) 10 . ?
 Zr5 O12A Zr4 110.0(4) 3_565 2_565 ?
 Zr5 O12A Zr4 139.5(7) 3_565 11 ?
 Zr5 O12A Zr4 29.0(2) 3_565 12_565 ?
 Zr5 O12A Zr4 62.9(3) 4 2_565 ?
 Zr5 O12A Zr4 139.5(7) 4 12_565 ?
 Zr5 O12A Zr4 29.0(2) 9_565 2_565 ?
 Zr5 O12A Zr4 62.9(3) 10 12_565 ?
 Zr5 O12A Zr4 110.0(4) 4 . ?
 Zr5 O12A Zr4 110.0(4) 9_565 12_565 ?
 Zr5 O12A Zr4 139.5(7) 9_565 . ?
 Zr5 O12A Zr5 168.5(9) 10 9_565 ?
 Zr5 O12A Zr5 59.5(2) 4 9_565 ?
 Zr5 O12A Zr5 119.1(3) 3_565 9_565 ?
 Zr5 O12A Zr5 119.1(3) 4 10 ?
 Zr5 O12A Zr5 168.5(9) 3_565 4 ?
 Zr5 O12A Zr5 59.5(2) 3_565 10 ?
 Zr5 O12A Zr6 75.2(2) 4 9_565 ?
 Zr5 O12A Zr6 113.9(5) 3_565 9_565 ?
 Zr5 O12A Zr6 113.9(5) 10 10 ?
 Zr5 O12A Zr6 113.9(5) 9_565 9_565 ?
 Zr5 O12A Zr6 75.2(2) 10 9_565 ?
 Zr5 O12A Zr6 75.2(2) 3_565 10 ?
 Zr5 O12A Zr6 113.9(5) 4 10 ?
 Zr5 O12A Zr6 75.2(2) 9_565 10 ?
 Zr6 O12A Zr4 122.2(4) 2_565 12_565 ?
 Zr6 O12A Zr4 98.35(13) 10 12_565 ?
 Zr6 O12A Zr4 98.35(13) 9_565 . ?
 Zr6 O12A Zr4 134.93(17) 10 11 ?
 Zr6 O12A Zr4 134.93(17) 9_565 2_565 ?
 Zr6 O12A Zr4 73.0(3) 2_565 . ?
 Zr6 O12A Zr4 134.93(17) 9_565 12_565 ?
 Zr6 O12A Zr4 73.0(3) 2_565 11 ?
 Zr6 O12A Zr4 73.0(3) . 12_565 ?
 Zr6 O12A Zr4 122.2(4) 2_565 2_565 ?
 Zr6 O12A Zr4 98.35(13) 10 2_565 ?
 Zr6 O12A Zr4 73.0(3) . 2_565 ?
 Zr6 O12A Zr4 134.93(17) 10 . ?
 Zr6 O12A Zr4 122.2(4) . 11 ?
 Zr6 O12A Zr4 98.35(13) 9_565 11 ?
 Zr6 O12A Zr4 122.2(4) . . ?
 Zr6 O12A Zr5 120.43(14) 2_565 3_565 ?
 Zr6 O12A Zr5 62.33(12) 2_565 4 ?
 Zr6 O12A Zr5 120.43(14) . 10 ?
 Zr6 O12A Zr5 120.43(14) 2_565 9_565 ?
 Zr6 O12A Zr5 120.43(14) . 4 ?
 Zr6 O12A Zr5 62.33(12) . 9_565 ?
 Zr6 O12A Zr5 62.33(12) . 3_565 ?
 Zr6 O12A Zr5 62.33(12) 2_565 10 ?
 Zr6 O12A Zr6 36.2(4) 2_565 9_565 ?
 Zr6 O12A Zr6 155.7(12) 2_565 . ?
 Zr6 O12A Zr6 83.3(7) 9_565 10 ?
 Zr6 O12A Zr6 119.5(9) . 9_565 ?
 Zr6 O12A Zr6 119.5(9) 2_565 10 ?
 Zr6 O12A Zr6 36.2(4) . 10 ?
 C2 C3A C4A 120.2(5) . . ?
 C3A C4A C5 119.9(5) . . ?
 C7A C6A C5 120.2(5) . . ?
 C6A C7A C2 119.7(5) . . ?
 C8 C9A C10A 119.9(5) . . ?
 C11 C10A C9A 119.7(5) . . ?
 C11 C12A C13A 120.2(5) . . ?
 C8 C13A C12A 119.9(5) . . ?
 O3A C15A Zr3 43(2) . 10_554 ?
 O3A C15A O4A 121(2) . . ?
 O3A C15A C16A 118.3(19) . . ?
 O4A C15A Zr3 87(3) . 10_554 ?
 O4A C15A C16A 120.0(17) . . ?
 C16A C15A Zr3 138(4) . 10_554 ?
 C17A C16A C15A 121(2) . . ?
 C17A C16A C21A 120.0 . . ?
 C21A C16A C15A 119(2) . . ?
 C18A C17A C16A 120.0 . . ?
 C17A C18A C19A 120.0 . . ?
 C18A C19A C22A 117(2) . . ?
 C20A C19A C18A 120.0 . . ?
 C20A C19A C22A 123(2) . . ?
 C21A C20A C19A 120.0 . . ?
 C20A C21A C16A 120.0 . . ?
 C23A C22A C19A 125(3) . . ?
 C23A C22A C27A 120.0 . . ?
 C27A C22A C19A 115(2) . . ?
 C24A C23A C22A 120.0 . . ?
 C25A C24A C23A 120.0 . . ?
 C24A C25A C24A 146(4) . 6_465 ?
 C24A C25A C26A 120.0 . . ?
 C25A C25A C24A 97(5) 6_465 . ?
 C25A C25A C24A 51.2(19) 6_465 6_465 ?
 C25A C25A C26A 126(3) 6_465 . ?
 C26A C25A C24A 91(3) . 6_465 ?
 C27A C26A C25A 120.0 . . ?
 C26A C27A C22A 120.0 . . ?
 Zr4 O3B Zr4 69.6(13) 13_464 8_454 ?
 Zr4 O3B Zr5 89.0(14) 13_464 15_454 ?
 Zr4 O3B O3B 99.1(9) 13_464 12_575 ?
 Zr4 O3B C15B 78(3) 13_464 . ?
 Zr5 O3B Zr4 70(3) 6_464 13_464 ?
 Zr5 O3B Zr4 32.5(3) 15_454 8_454 ?
 Zr5 O3B Zr4 86.7(14) 6_464 8_454 ?
 Zr5 O3B Zr5 68.6(8) 6_464 15_454 ?
 Zr5 O3B O3B 96.9(9) 6_464 12_575 ?
 Zr5 O3B C15B 67(2) 6_464 . ?
 O3B O3B Zr4 29.5(11) 12_575 8_454 ?
 O3B O3B Zr5 28.4(9) 12_575 15_454 ?
 C15B O3B Zr4 144(4) . 8_454 ?
 C15B O3B Zr5 136(2) . 15_454 ?
 C15B O3B O3B 164.3(15) . 12_575 ?
 Zr3 O4B Zr3 32.6(5) 13_464 6_464 ?
 Zr3 O4B Zr4 146.2(18) 6_464 13_464 ?
 Zr3 O4B Zr4 118.3(18) 13_464 13_464 ?
 Zr3 O4B Zr5 90.1(8) 6_464 13_464 ?
 Zr3 O4B Zr5 119.7(9) 13_464 13_464 ?
 Zr3 O4B Zr6 75.3(7) 13_464 5_454 ?
 Zr5 O4B Zr3 144.3(10) 6_464 6_464 ?
 Zr5 O4B Zr3 136(2) 6_464 13_464 ?
 Zr5 O4B Zr4 30.7(7) 6_464 13_464 ?
 Zr5 O4B Zr4 103.8(12) 13_464 13_464 ?
 Zr5 O4B Zr5 73.1(11) 6_464 13_464 ?
 Zr5 O4B Zr6 87.3(9) 6_464 5_454 ?
 Zr5 O4B Zr6 70.1(12) 6_464 14_454 ?
 Zr6 O4B Zr3 76.0(8) 14_454 6_464 ?
 Zr6 O4B Zr3 71.8(11) 14_454 13_464 ?
 Zr6 O4B Zr3 58.4(5) 5_454 6_464 ?
 Zr6 O4B Zr4 107.3(13) 5_454 13_464 ?
 Zr6 O4B Zr4 76.6(13) 14_454 13_464 ?
 Zr6 O4B Zr5 79.0(7) 14_454 13_464 ?
 Zr6 O4B Zr5 51.1(4) 5_454 13_464 ?
 Zr6 O4B Zr6 37.5(4) 14_454 5_454 ?
 O4B O4B Zr3 90.2(10) 10_553 13_464 ?
 O4B O4B Zr3 57.6(9) 10_553 6_464 ?
 O4B O4B Zr4 143.0(7) 10_553 13_464 ?
 O4B O4B Zr5 39.2(9) 10_553 13_464 ?
 O4B O4B Zr5 112.4(11) 10_553 6_464 ?
 O4B O4B Zr6 54.9(10) 10_553 5_454 ?
 O4B O4B Zr6 92.4(10) 10_553 14_454 ?
 O4B O4B C15B 134(3) 10_553 . ?
 C15B O4B Zr3 131(2) . 13_464 ?
 C15B O4B Zr3 158.4(17) . 6_464 ?
 C15B O4B Zr4 40(2) . 13_464 ?
 C15B O4B Zr5 109(2) . 13_464 ?
 C15B O4B Zr5 55.1(15) . 6_464 ?
 C15B O4B Zr6 117(3) . 14_454 ?
 C15B O4B Zr6 142(2) . 5_454 ?
 Zr4 C15B Zr6 69.6(13) 13_464 14_454 ?
 Zr5 C15B Zr4 50.6(13) 6_464 13_464 ?
 Zr5 C15B Zr6 43.5(10) 6_464 14_454 ?
 Zr5 C15B C16B 155(3) 6_464 . ?
 O3B C15B Zr4 46(2) . 13_464 ?
 O3B C15B Zr5 46.2(19) . 6_464 ?
 O3B C15B Zr6 89(2) . 14_454 ?
 O3B C15B C16B 126(2) . . ?
 O4B C15B Zr4 106(3) . 13_464 ?
 O4B C15B Zr5 70.8(19) . 6_464 ?
 O4B C15B Zr6 36(2) . 14_454 ?
 O4B C15B O3B 116(2) . . ?
 O4B C15B C16B 116(2) . . ?
 C16B C15B Zr4 106.0(18) . 13_464 ?
 C16B C15B Zr6 128.4(18) . 14_454 ?
 Zr4 C16B Zr5 26.5(2) 13_464 6_464 ?
 C15B C16B Zr4 37.4(14) . 13_464 ?
 C15B C16B Zr5 11.5(14) . 6_464 ?
 C17B C16B Zr4 133.4(18) . 13_464 ?
 C17B C16B Zr5 123.5(17) . 6_464 ?
 C17B C16B C15B 121(2) . . ?
 C17B C16B C21B 120.0 . . ?
 C21B C16B Zr4 95.9(17) . 13_464 ?
 C21B C16B Zr5 115.2(17) . 6_464 ?
 C21B C16B C15B 119(2) . . ?
 C18B C17B C16B 120.0 . . ?
 C19B C18B C17B 120.0 . . ?
 C18B C19B C20B 120.0 . . ?
 C18B C19B C22B 120(3) . . ?
 C20B C19B C22B 119(3) . . ?
 C19B C20B C21B 120.0 . . ?
 C20B C21B C16B 120.0 . . ?
 C23B C22B C19B 119(2) . . ?
 C23B C22B C27B 120.0 . . ?
 C27B C22B C19B 119(3) . . ?
 C24B C23B C22B 120.0 . . ?
 C23B C24B C25B 120.0 . . ?
 C24B C25B C26B 120.0 . . ?
 C25B C26B C27B 120.0 . . ?
 C26B C27B C22B 120.0 . . ?
 Zr4 O3C Zr4 75.3(8) 6_465 15_455 ?
 Zr4 O3C Zr5 22.0(13) 6_465 13_465 ?
 Zr4 O3C O3C 101.5(7) 6_465 12_575 ?
 Zr4 O3C C15C 65.7(15) 6_465 . ?
 Zr5 O3C Zr4 69.5(5) 13_465 15_455 ?
 O3C O3C Zr4 26.2(7) 12_575 15_455 ?
 O3C O3C Zr5 93.9(4) 12_575 13_465 ?
 C15C O3C Zr4 140.9(18) . 15_455 ?
 C15C O3C Zr5 73.6(13) . 13_465 ?
 C15C O3C O3C 167.1(12) . 12_575 ?
 Zr4 O4C Zr3 146.0(8) 6_465 6_465 ?
 Zr4 O4C Zr5 47.5(11) 6_465 13_465 ?
 Zr4 O4C Zr6 88.7(10) 6_465 5_455 ?
 Zr5 O4C Zr3 106.5(9) 13_465 6_465 ?
 Zr5 O4C Zr6 59.1(5) 13_465 5_455 ?
 Zr6 O4C Zr3 57.3(5) 5_455 6_465 ?
 C15C O4C Zr3 159(2) . 6_465 ?
 C15C O4C Zr4 54.7(14) . 6_465 ?
 C15C O4C Zr5 93(2) . 13_465 ?
 C15C O4C Zr6 143(2) . 5_455 ?
 Zr4 C15C Zr5 31.6(8) 6_465 13_465 ?
 Zr4 C15C O3C 44.5(14) 6_465 . ?
 Zr4 C15C O4C 68(2) 6_465 . ?
 Zr4 C15C C16C 164(5) 6_465 . ?
 O3C C15C Zr5 70.3(13) . 13_465 ?
 O3C C15C C16C 127(2) . . ?
 O4C C15C Zr5 49.1(18) . 13_465 ?
 O4C C15C O3C 113(3) . . ?
 O4C C15C C16C 117.6(19) . . ?
 C16C C15C Zr5 163(2) . 13_465 ?
 C15C C16C Zr4 7(2) . 6_465 ?
 C17C C16C Zr4 114.3(16) . 6_465 ?
 C17C C16C C15C 116(2) . . ?
 C17C C16C C21C 120.0 . . ?
 C21C C16C Zr4 124.4(17) . 6_465 ?
 C21C C16C C15C 124(2) . . ?
 C16C C17C C18C 120.0 . . ?
 C19C C18C C17C 120.0 . . ?
 C18C C19C C20C 120.0 . . ?
 C18C C19C C22C 122(3) . . ?
 C20C C19C C22C 117(3) . . ?
 C19C C20C C21C 120.0 . . ?
 C20C C21C C16C 120.0 . . ?
 C23C C22C C19C 114(3) . . ?
 C23C C22C C27C 120.0 . . ?
 C27C C22C C19C 126(3) . . ?
 C22C C23C C24C 120.0 . . ?
 C23C C24C C25C 120.0 . . ?
 C24C C25C C25C 121.7 . 10_554 ?
 C26C C25C C24C 120.0 . . ?
 C26C C25C C25C 89.8 . 10_554 ?
 C25C C26C C27C 120.0 . . ?
 C26C C27C C22C 120.0 . . ?

_shelx_fab_file
;
 0 0 2 527.23 0.00
 0 0 3 -150.03 0.00
 0 0 9 -18.26 0.00
 0 0 10 -15.73 0.00
 0 0 11 3.02 0.00
 0 0 12 9.05 0.00
 0 0 13 -1.10 0.00
 0 0 14 2.61 0.00
 0 0 15 2.31 0.00
 0 0 16 -0.06 0.00
 0 0 17 -0.60 0.00
 0 0 18 7.95 0.00
 0 0 19 2.20 0.00
 0 2 2 55.89 0.00
 0 2 3 -87.26 0.00
 0 2 4 -40.75 0.00
 0 2 5 32.24 0.00
 0 2 9 -12.20 0.00
 0 2 10 -20.93 0.00
 0 2 11 2.51 0.00
 0 2 12 7.58 0.00
 0 2 13 1.80 0.00
 0 2 14 1.34 0.00
 0 2 15 2.26 0.00
 0 2 16 -6.23 0.00
 0 2 17 -4.66 0.00
 0 2 18 3.00 0.00
 0 2 19 0.05 0.00
 0 2 20 -1.47 0.00
 0 4 1 -70.92 0.00
 0 4 2 -206.83 0.00
 0 4 3 -56.82 0.00
 0 4 4 -101.17 0.00
 0 4 5 43.04 0.00
 0 4 6 -22.28 0.00
 0 4 9 -20.14 0.00
 0 4 10 -6.98 0.00
 0 4 11 6.73 0.00
 0 4 12 5.62 0.00
 0 4 13 1.94 0.00
 0 4 14 -0.41 0.00
 0 4 15 0.59 0.00
 0 4 16 -3.18 0.00
 0 4 17 -0.09 0.00
 0 4 18 6.77 0.00
 0 4 19 -0.51 0.00
 0 4 20 1.30 0.00
 0 6 0 -176.26 0.00
 0 6 1 -12.17 0.00
 0 6 2 -92.57 0.00
 0 6 3 -57.16 0.00
 0 6 4 -39.57 0.00
 0 6 5 26.80 0.00
 0 6 6 10.69 0.00
 0 6 9 -17.83 0.00
 0 6 10 -9.91 0.00
 0 6 11 10.24 0.00
 0 6 12 -12.34 0.00
 0 6 13 0.54 0.00
 0 6 14 -5.36 0.00
 0 6 15 0.74 0.00
 0 6 16 -4.97 0.00
 0 6 17 0.01 0.00
 0 6 18 4.67 0.00
 0 6 19 -1.43 0.00
 0 6 20 -3.16 0.00
 0 8 0 -14.87 0.00
 0 8 1 71.21 0.00
 0 8 2 -82.61 0.00
 0 8 3 0.85 0.00
 0 8 4 -20.50 0.00
 0 8 5 13.11 0.00
 0 8 6 41.72 0.00
 0 8 7 0.51 0.00
 0 8 9 -15.82 0.00
 0 8 10 2.43 0.00
 0 8 11 9.08 0.00
 0 8 12 -0.87 0.00
 0 8 13 0.40 0.00
 0 8 14 5.24 0.00
 0 8 15 6.08 0.00
 0 8 16 -1.03 0.00
 0 8 17 2.60 0.00
 0 8 18 -0.50 0.00
 0 8 19 1.27 0.00
 0 8 20 -3.30 0.00
 0 10 0 -26.28 0.00
 0 10 1 15.34 0.00
 0 10 2 41.37 0.00
 0 10 3 13.43 0.00
 0 10 4 25.54 0.00
 0 10 5 19.07 0.00
 0 10 6 24.75 0.00
 0 10 7 4.84 0.00
 0 10 9 -11.90 0.00
 0 10 10 3.10 0.00
 0 10 11 3.28 0.00
 0 10 12 2.46 0.00
 0 10 13 -0.73 0.00
 0 10 14 9.34 0.00
 0 10 15 1.82 0.00
 0 10 16 0.62 0.00
 0 10 17 1.46 0.00
 0 10 18 -4.04 0.00
 0 10 19 2.92 0.00
 0 10 20 -4.09 0.00
 0 12 0 -17.96 0.00
 0 12 1 38.38 0.00
 0 12 2 -9.23 0.00
 0 12 3 27.77 0.00
 0 12 4 23.27 0.00
 0 12 5 -25.46 0.00
 0 12 6 6.26 0.00
 0 12 7 4.83 0.00
 0 12 8 -8.99 0.00
 0 12 9 -11.11 0.00
 0 12 10 5.28 0.00
 0 12 11 -2.86 0.00
 0 12 12 0.61 0.00
 0 12 13 -8.89 0.00
 0 12 14 1.04 0.00
 0 12 15 -1.49 0.00
 0 12 16 0.50 0.00
 0 12 17 -2.80 0.00
 0 12 18 -4.57 0.00
 0 12 19 2.91 0.00
 0 12 20 1.71 0.00
 0 14 0 14.15 0.00
 0 14 1 7.80 0.00
 0 14 2 22.06 0.00
 0 14 3 -0.21 0.00
 0 14 4 35.88 0.00
 0 14 5 -21.70 0.00
 0 14 6 -10.38 0.00
 0 14 7 1.82 0.00
 0 14 8 -2.33 0.00
 0 14 9 -9.78 0.00
 0 14 10 5.69 0.00
 0 14 11 -4.87 0.00
 0 14 12 -5.06 0.00
 0 14 13 0.66 0.00
 0 14 14 -3.57 0.00
 0 14 15 0.38 0.00
 0 14 16 2.62 0.00
 0 14 17 2.42 0.00
 0 14 18 -4.56 0.00
 0 14 19 0.88 0.00
 0 16 0 38.36 0.00
 0 16 1 -21.48 0.00
 0 16 2 6.23 0.00
 0 16 3 15.60 0.00
 0 16 4 25.04 0.00
 0 16 5 -2.66 0.00
 0 16 6 -22.65 0.00
 0 16 7 0.88 0.00
 0 16 8 -1.10 0.00
 0 16 9 -3.23 0.00
 0 16 10 1.15 0.00
 0 16 11 -2.93 0.00
 0 16 12 2.63 0.00
 0 16 13 -0.31 0.00
 0 16 14 -8.94 0.00
 0 16 15 2.71 0.00
 0 16 16 6.67 0.00
 0 16 17 0.45 0.00
 0 16 18 -2.51 0.00
 0 16 19 -2.62 0.00
 0 18 0 17.45 0.00
 0 18 1 -15.94 0.00
 0 18 2 1.98 0.00
 0 18 3 4.96 0.00
 0 18 4 16.50 0.00
 0 18 5 6.70 0.00
 0 18 6 -27.65 0.00
 0 18 7 3.45 0.00
 0 18 8 0.06 0.00
 0 18 9 1.77 0.00
 0 18 10 -0.03 0.00
 0 18 11 -1.68 0.00
 0 18 12 8.64 0.00
 0 18 13 6.75 0.00
 0 18 14 -0.24 0.00
 0 18 15 2.49 0.00
 0 18 16 5.41 0.00
 0 18 17 4.20 0.00
 0 18 18 -4.61 0.00
 0 18 19 -1.91 0.00
 0 20 0 -3.92 0.00
 0 20 1 0.24 0.00
 0 20 2 -10.89 0.00
 0 20 3 5.42 0.00
 0 20 4 11.92 0.00
 0 20 5 0.91 0.00
 0 20 6 -3.57 0.00
 0 20 7 -6.03 0.00
 0 20 9 3.95 0.00
 0 20 10 4.95 0.00
 0 20 11 3.74 0.00
 0 20 12 6.63 0.00
 0 20 13 3.14 0.00
 0 20 14 -4.65 0.00
 0 20 15 -4.31 0.00
 0 20 16 3.27 0.00
 0 20 17 1.31 0.00
 0 20 18 0.05 0.00
 0 22 0 -21.68 0.00
 0 22 1 6.76 0.00
 0 22 2 -3.74 0.00
 0 22 3 9.50 0.00
 0 22 4 -6.09 0.00
 0 22 5 5.77 0.00
 0 22 6 -0.05 0.00
 0 22 7 -8.78 0.00
 0 22 8 4.98 0.00
 0 22 9 2.75 0.00
 0 22 10 -0.37 0.00
 0 22 11 3.73 0.00
 0 22 12 0.55 0.00
 0 22 13 4.79 0.00
 0 22 14 -0.29 0.00
 0 22 15 -4.52 0.00
 0 22 16 0.76 0.00
 0 22 17 2.06 0.00
 0 22 18 2.19 0.00
 0 24 0 -6.80 0.00
 0 24 1 5.43 0.00
 0 24 2 5.05 0.00
 0 24 3 1.55 0.00
 0 24 4 -10.26 0.00
 0 24 5 6.81 0.00
 0 24 6 -2.58 0.00
 0 24 7 -2.54 0.00
 0 24 8 0.49 0.00
 0 24 9 6.79 0.00
 0 24 10 -10.33 0.00
 0 24 11 0.60 0.00
 0 24 12 -4.63 0.00
 0 24 13 4.58 0.00
 0 24 14 1.05 0.00
 0 24 15 4.30 0.00
 0 24 16 0.61 0.00
 0 26 0 -11.01 0.00
 0 26 1 3.86 0.00
 0 26 2 5.34 0.00
 0 26 3 -5.95 0.00
 0 26 4 -7.01 0.00
 0 26 5 0.24 0.00
 0 26 6 -5.79 0.00
 0 26 7 -4.43 0.00
 0 26 8 -4.68 0.00
 0 26 9 6.33 0.00
 0 26 10 1.39 0.00
 0 26 11 -4.29 0.00
 0 26 12 0.93 0.00
 0 26 13 -3.36 0.00
 0 26 14 -0.82 0.00
 0 26 15 5.45 0.00
 0 26 16 2.00 0.00
 0 28 0 -10.09 0.00
 0 28 1 -2.00 0.00
 0 28 2 -2.79 0.00
 0 28 3 -2.91 0.00
 0 28 4 1.08 0.00
 0 28 5 -0.40 0.00
 0 28 6 2.27 0.00
 0 28 7 -4.06 0.00
 0 28 8 10.76 0.00
 0 28 9 3.92 0.00
 0 28 10 1.38 0.00
 0 28 11 -3.30 0.00
 0 28 12 1.38 0.00
 0 28 13 -2.18 0.00
 0 28 14 -0.22 0.00
 0 28 15 3.34 0.00
 0 28 16 4.43 0.00
 0 30 0 4.52 0.00
 0 30 1 -8.35 0.00
 0 30 2 0.01 0.00
 0 30 3 -5.08 0.00
 0 30 4 6.74 0.00
 0 30 5 -1.25 0.00
 0 30 6 -0.41 0.00
 0 30 7 -3.71 0.00
 0 30 8 -1.93 0.00
 0 30 9 -2.31 0.00
 0 30 10 -0.07 0.00
 0 30 11 1.75 0.00
 0 30 12 3.12 0.00
 0 30 13 0.02 0.00
 0 30 14 -3.13 0.00
 0 30 15 -3.15 0.00
 0 32 0 4.85 0.00
 0 32 1 -2.16 0.00
 0 32 2 3.62 0.00
 0 32 3 -0.23 0.00
 0 32 4 8.87 0.00
 0 32 5 -1.94 0.00
 0 32 6 -4.83 0.00
 0 32 7 1.76 0.00
 0 32 8 2.42 0.00
 0 32 9 3.41 0.00
 0 32 10 -3.48 0.00
 0 32 11 -1.15 0.00
 0 32 12 -0.85 0.00
 0 32 13 1.57 0.00
 0 32 14 0.28 0.00
 0 32 15 -7.02 0.00
 0 34 0 9.99 0.00
 0 34 1 3.18 0.00
 0 34 2 1.82 0.00
 0 34 3 -1.23 0.00
 0 34 4 5.22 0.00
 0 34 5 -0.21 0.00
 0 34 6 -0.92 0.00
 0 34 7 0.78 0.00
 0 34 8 -1.77 0.00
 0 34 9 -1.67 0.00
 0 34 10 -0.06 0.00
 0 34 11 -3.22 0.00
 0 34 12 -1.29 0.00
 0 34 13 3.47 0.00
 0 34 14 1.71 0.00
 0 36 0 -3.06 0.00
 0 36 1 4.77 0.00
 0 36 2 -0.84 0.00
 0 36 3 -3.96 0.00
 0 36 4 -0.37 0.00
 0 36 5 0.01 0.00
 0 36 6 -2.25 0.00
 0 36 7 -2.39 0.00
 0 36 8 2.24 0.00
 0 36 9 0.82 0.00
 0 36 10 -0.15 0.00
 0 36 11 -1.83 0.00
 0 36 12 1.09 0.00
 0 36 13 1.66 0.00
 0 38 0 -8.07 0.00
 0 38 1 5.26 0.00
 0 38 2 -0.57 0.00
 0 38 3 2.34 0.00
 0 38 4 1.01 0.00
 0 38 5 -0.87 0.00
 0 38 6 0.90 0.00
 0 38 7 0.43 0.00
 0 38 8 2.11 0.00
 0 38 9 -0.04 0.00
 0 38 10 0.25 0.00
 0 38 11 -2.83 0.00
 0 38 12 -1.45 0.00
 0 38 13 -1.80 0.00
 0 40 0 -1.69 0.00
 0 40 1 3.50 0.00
 0 40 2 2.79 0.00
 0 40 3 -2.59 0.00
 0 40 4 -2.74 0.00
 0 40 5 2.11 0.00
 0 40 6 0.63 0.00
 0 40 7 0.33 0.00
 0 40 8 -2.04 0.00
 0 40 9 -0.01 0.00
 0 40 10 -2.55 0.00
 0 40 11 0.63 0.00
 0 40 12 0.02 0.00
 0 42 0 -1.62 0.00
 0 42 1 2.97 0.00
 0 42 2 2.76 0.00
 0 42 3 2.44 0.00
 0 42 4 -3.33 0.00
 0 42 5 2.50 0.00
 0 42 6 -2.50 0.00
 0 42 7 3.27 0.00
 0 42 8 -1.88 0.00
 0 42 9 -2.49 0.00
 0 42 10 2.22 0.00
 0 42 11 3.39 0.00
 0 44 0 3.12 0.00
 0 44 1 -1.93 0.00
 0 44 2 0.30 0.00
 0 44 3 1.09 0.00
 0 44 4 -4.42 0.00
 0 44 5 4.23 0.00
 0 44 6 0.82 0.00
 0 44 7 -0.44 0.00
 0 44 8 -0.43 0.00
 0 44 9 4.10 0.00
 0 46 0 -1.55 0.00
 0 46 1 -2.29 0.00
 0 46 2 0.59 0.00
 0 46 3 -2.84 0.00
 0 46 4 -0.25 0.00
 0 46 5 0.58 0.00
 0 46 6 -3.43 0.00
 0 46 7 1.35 0.00
 0 48 3 -3.71 0.00
 0 48 4 -0.32 0.00
 0 48 5 0.65 0.00
 1 1 1 477.25 0.00
 1 1 2 2.03 0.00
 1 1 3 -140.76 0.00
 1 1 4 45.36 0.00
 1 1 5 -22.91 0.00
 1 1 6 -25.06 0.00
 1 1 9 -22.56 0.00
 1 1 10 -3.59 0.00
 1 1 11 2.19 0.00
 1 1 12 0.23 0.00
 1 1 13 6.46 0.00
 1 1 14 0.60 0.00
 1 1 15 -6.34 0.00
 1 1 16 2.51 0.00
 1 1 17 2.44 0.00
 1 1 18 -6.15 0.00
 1 1 19 3.87 0.00
 1 1 20 1.49 0.00
 1 3 1 227.41 0.00
 1 3 2 -173.17 0.00
 1 3 3 -53.97 0.00
 1 3 4 -1.07 0.00
 1 3 5 18.91 0.00
 1 3 6 -9.27 0.00
 1 3 7 11.88 0.00
 1 3 9 -19.85 0.00
 1 3 10 -3.35 0.00
 1 3 11 1.41 0.00
 1 3 12 2.48 0.00
 1 3 13 6.97 0.00
 1 3 14 3.30 0.00
 1 3 15 -5.51 0.00
 1 3 16 0.38 0.00
 1 3 17 1.58 0.00
 1 3 18 -0.37 0.00
 1 3 19 2.70 0.00
 1 3 20 0.90 0.00
 1 5 1 -135.16 0.00
 1 5 2 48.00 0.00
 1 5 3 -24.98 0.00
 1 5 4 10.91 0.00
 1 5 5 24.43 0.00
 1 5 6 11.66 0.00
 1 5 7 -7.37 0.00
 1 5 8 -24.93 0.00
 1 5 9 -23.54 0.00
 1 5 10 0.26 0.00
 1 5 11 1.54 0.00
 1 5 12 -2.07 0.00
 1 5 13 3.22 0.00
 1 5 14 -1.25 0.00
 1 5 15 -5.40 0.00
 1 5 16 -0.22 0.00
 1 5 17 2.33 0.00
 1 5 18 3.07 0.00
 1 5 19 0.44 0.00
 1 5 20 -1.51 0.00
 1 7 0 -43.25 0.00
 1 7 1 85.53 0.00
 1 7 2 5.01 0.00
 1 7 3 17.36 0.00
 1 7 4 -21.15 0.00
 1 7 5 -11.01 0.00
 1 7 6 33.73 0.00
 1 7 7 12.25 0.00
 1 7 8 -28.67 0.00
 1 7 9 -6.54 0.00
 1 7 10 1.17 0.00
 1 7 11 -2.72 0.00
 1 7 12 0.63 0.00
 1 7 13 -2.70 0.00
 1 7 14 4.57 0.00
 1 7 15 -1.89 0.00
 1 7 16 -1.65 0.00
 1 7 17 -1.32 0.00
 1 7 18 5.62 0.00
 1 7 19 1.41 0.00
 1 7 20 -4.72 0.00
 1 9 0 -21.32 0.00
 1 9 1 -10.08 0.00
 1 9 2 9.07 0.00
 1 9 3 31.83 0.00
 1 9 4 -39.51 0.00
 1 9 5 3.28 0.00
 1 9 6 20.32 0.00
 1 9 7 9.47 0.00
 1 9 8 -10.41 0.00
 1 9 9 -12.83 0.00
 1 9 10 1.97 0.00
 1 9 11 -0.96 0.00
 1 9 12 1.15 0.00
 1 9 13 1.14 0.00
 1 9 14 1.63 0.00
 1 9 15 2.19 0.00
 1 9 16 -4.68 0.00
 1 9 17 -2.03 0.00
 1 9 18 -1.31 0.00
 1 9 19 -2.17 0.00
 1 9 20 -2.84 0.00
 1 11 0 -22.52 0.00
 1 11 1 -8.16 0.00
 1 11 2 26.40 0.00
 1 11 3 12.51 0.00
 1 11 4 -14.25 0.00
 1 11 5 0.88 0.00
 1 11 6 15.60 0.00
 1 11 7 5.59 0.00
 1 11 8 1.13 0.00
 1 11 9 -4.37 0.00
 1 11 10 1.04 0.00
 1 11 11 3.71 0.00
 1 11 12 2.81 0.00
 1 11 13 -2.99 0.00
 1 11 14 3.25 0.00
 1 11 15 5.16 0.00
 1 11 16 -1.22 0.00
 1 11 17 -3.10 0.00
 1 11 18 3.33 0.00
 1 11 19 0.39 0.00
 1 11 20 0.40 0.00
 1 13 0 -3.31 0.00
 1 13 1 -18.89 0.00
 1 13 2 22.02 0.00
 1 13 3 21.83 0.00
 1 13 4 -11.19 0.00
 1 13 5 -0.12 0.00
 1 13 6 4.91 0.00
 1 13 7 2.27 0.00
 1 13 8 6.23 0.00
 1 13 9 -2.23 0.00
 1 13 10 -5.47 0.00
 1 13 11 2.20 0.00
 1 13 12 -2.42 0.00
 1 13 13 -4.62 0.00
 1 13 14 -1.45 0.00
 1 13 15 1.39 0.00
 1 13 16 -0.49 0.00
 1 13 17 -1.57 0.00
 1 13 18 -2.02 0.00
 1 13 19 -1.31 0.00
 1 15 0 -3.81 0.00
 1 15 1 -5.75 0.00
 1 15 2 -1.42 0.00
 1 15 3 2.84 0.00
 1 15 4 14.88 0.00
 1 15 5 -5.75 0.00
 1 15 6 -8.02 0.00
 1 15 7 -8.38 0.00
 1 15 8 5.10 0.00
 1 15 9 2.78 0.00
 1 15 10 -3.70 0.00
 1 15 11 0.03 0.00
 1 15 12 3.29 0.00
 1 15 13 -2.68 0.00
 1 15 14 -2.33 0.00
 1 15 15 1.93 0.00
 1 15 16 6.66 0.00
 1 15 17 0.59 0.00
 1 15 18 -2.18 0.00
 1 15 19 -0.92 0.00
 1 17 0 2.94 0.00
 1 17 1 1.02 0.00
 1 17 2 -9.34 0.00
 1 17 3 24.01 0.00
 1 17 4 11.49 0.00
 1 17 5 6.37 0.00
 1 17 6 -11.48 0.00
 1 17 7 -7.11 0.00
 1 17 8 1.98 0.00
 1 17 9 4.76 0.00
 1 17 10 -4.99 0.00
 1 17 11 2.39 0.00
 1 17 12 6.17 0.00
 1 17 13 -0.17 0.00
 1 17 14 -1.23 0.00
 1 17 15 -0.33 0.00
 1 17 16 9.89 0.00
 1 17 17 3.00 0.00
 1 17 18 -3.45 0.00
 1 17 19 1.26 0.00
 1 19 0 13.92 0.00
 1 19 1 -4.83 0.00
 1 19 2 4.74 0.00
 1 19 3 -4.57 0.00
 1 19 4 14.91 0.00
 1 19 5 -0.47 0.00
 1 19 6 -17.44 0.00
 1 19 7 -4.36 0.00
 1 19 8 5.34 0.00
 1 19 9 2.34 0.00
 1 19 10 -5.27 0.00
 1 19 11 -0.51 0.00
 1 19 12 3.55 0.00
 1 19 13 2.50 0.00
 1 19 14 -5.05 0.00
 1 19 15 1.20 0.00
 1 19 16 5.80 0.00
 1 19 17 2.53 0.00
 1 19 18 -4.54 0.00
 1 21 0 0.21 0.00
 1 21 1 -1.95 0.00
 1 21 2 -6.85 0.00
 1 21 3 11.43 0.00
 1 21 4 6.56 0.00
 1 21 5 6.11 0.00
 1 21 6 -2.11 0.00
 1 21 7 -2.50 0.00
 1 21 8 -0.61 0.00
 1 21 9 3.54 0.00
 1 21 10 0.87 0.00
 1 21 11 1.18 0.00
 1 21 12 2.99 0.00
 1 21 13 0.38 0.00
 1 21 14 -5.33 0.00
 1 21 15 -1.91 0.00
 1 21 16 4.40 0.00
 1 21 17 -2.25 0.00
 1 21 18 1.55 0.00
 1 23 0 -11.94 0.00
 1 23 1 -1.16 0.00
 1 23 2 7.56 0.00
 1 23 3 -2.43 0.00
 1 23 4 -5.39 0.00
 1 23 5 -1.26 0.00
 1 23 6 -1.22 0.00
 1 23 7 3.00 0.00
 1 23 8 -2.24 0.00
 1 23 9 0.14 0.00
 1 23 10 -0.21 0.00
 1 23 11 -3.28 0.00
 1 23 12 2.98 0.00
 1 23 13 2.32 0.00
 1 23 14 2.65 0.00
 1 23 15 0.10 0.00
 1 23 16 0.28 0.00
 1 23 17 -0.56 0.00
 1 25 0 3.70 0.00
 1 25 1 -1.23 0.00
 1 25 2 2.57 0.00
 1 25 3 2.36 0.00
 1 25 4 -4.40 0.00
 1 25 5 -1.03 0.00
 1 25 6 -1.62 0.00
 1 25 7 1.80 0.00
 1 25 8 -0.57 0.00
 1 25 9 0.56 0.00
 1 25 10 1.84 0.00
 1 25 11 0.65 0.00
 1 25 12 -1.98 0.00
 1 25 13 -0.02 0.00
 1 25 14 4.58 0.00
 1 25 15 0.56 0.00
 1 25 16 6.09 0.00
 1 25 17 -8.56 0.00
 1 27 0 -6.54 0.00
 1 27 1 -1.66 0.00
 1 27 2 5.81 0.00
 1 27 3 1.85 0.00
 1 27 4 -2.20 0.00
 1 27 5 -1.95 0.00
 1 27 6 2.88 0.00
 1 27 7 -0.94 0.00
 1 27 8 1.70 0.00
 1 27 9 1.63 0.00
 1 27 10 5.14 0.00
 1 27 11 0.17 0.00
 1 27 12 -2.98 0.00
 1 27 13 -3.08 0.00
 1 27 14 0.80 0.00
 1 27 15 1.88 0.00
 1 27 16 4.62 0.00
 1 29 0 1.88 0.00
 1 29 1 -1.84 0.00
 1 29 2 -1.85 0.00
 1 29 3 0.13 0.00
 1 29 4 -0.36 0.00
 1 29 5 0.09 0.00
 1 29 6 -4.46 0.00
 1 29 7 0.50 0.00
 1 29 8 1.28 0.00
 1 29 9 -3.64 0.00
 1 29 10 -3.12 0.00
 1 29 11 3.30 0.00
 1 29 12 -3.04 0.00
 1 29 13 0.34 0.00
 1 29 14 -2.63 0.00
 1 29 15 1.89 0.00
 1 29 16 5.57 0.00
 1 31 0 -1.96 0.00
 1 31 1 -2.60 0.00
 1 31 2 0.49 0.00
 1 31 3 2.36 0.00
 1 31 4 5.71 0.00
 1 31 5 0.40 0.00
 1 31 6 -3.63 0.00
 1 31 7 -0.29 0.00
 1 31 8 -2.31 0.00
 1 31 9 -2.30 0.00
 1 31 10 -2.31 0.00
 1 31 11 1.63 0.00
 1 31 12 0.49 0.00
 1 31 13 -0.36 0.00
 1 31 14 -1.03 0.00
 1 31 15 -3.20 0.00
 1 33 0 4.49 0.00
 1 33 1 -1.33 0.00
 1 33 2 -2.98 0.00
 1 33 3 -0.18 0.00
 1 33 4 0.43 0.00
 1 33 5 -1.30 0.00
 1 33 6 -2.64 0.00
 1 33 7 -2.00 0.00
 1 33 8 4.63 0.00
 1 33 9 -2.62 0.00
 1 33 10 1.34 0.00
 1 33 11 -1.20 0.00
 1 33 12 0.83 0.00
 1 33 13 0.66 0.00
 1 33 14 4.65 0.00
 1 33 15 -0.26 0.00
 1 35 0 5.58 0.00
 1 35 1 -0.33 0.00
 1 35 2 -3.57 0.00
 1 35 3 -0.62 0.00
 1 35 4 1.88 0.00
 1 35 5 -1.98 0.00
 1 35 6 1.53 0.00
 1 35 7 -1.96 0.00
 1 35 8 2.82 0.00
 1 35 9 -0.61 0.00
 1 35 10 -0.81 0.00
 1 35 11 -1.72 0.00
 1 35 12 -0.88 0.00
 1 35 13 0.09 0.00
 1 35 14 -1.09 0.00
 1 37 0 4.28 0.00
 1 37 1 -1.63 0.00
 1 37 2 -0.80 0.00
 1 37 3 -0.34 0.00
 1 37 4 0.09 0.00
 1 37 5 1.44 0.00
 1 37 6 -0.45 0.00
 1 37 7 -1.75 0.00
 1 37 8 -1.22 0.00
 1 37 9 2.04 0.00
 1 37 10 2.67 0.00
 1 37 11 -3.34 0.00
 1 37 12 0.52 0.00
 1 37 13 4.33 0.00
 1 39 0 -0.58 0.00
 1 39 1 -0.65 0.00
 1 39 2 0.65 0.00
 1 39 3 3.12 0.00
 1 39 4 -1.81 0.00
 1 39 5 0.14 0.00
 1 39 6 -0.08 0.00
 1 39 7 -1.28 0.00
 1 39 8 2.22 0.00
 1 39 9 1.50 0.00
 1 39 10 -1.65 0.00
 1 39 11 -2.37 0.00
 1 39 12 -3.14 0.00
 1 41 0 4.57 0.00
 1 41 1 2.14 0.00
 1 41 2 3.53 0.00
 1 41 3 -0.97 0.00
 1 41 4 -0.75 0.00
 1 41 5 1.92 0.00
 1 41 6 3.34 0.00
 1 41 7 -1.57 0.00
 1 41 8 -2.93 0.00
 1 41 9 1.42 0.00
 1 41 10 0.21 0.00
 1 41 11 -0.68 0.00
 1 43 0 -4.04 0.00
 1 43 1 1.69 0.00
 1 43 2 1.26 0.00
 1 43 3 1.12 0.00
 1 43 4 -1.35 0.00
 1 43 5 -0.03 0.00
 1 43 6 -0.44 0.00
 1 43 7 -2.09 0.00
 1 43 8 -0.63 0.00
 1 43 9 0.53 0.00
 1 43 10 -0.02 0.00
 1 45 0 -3.05 0.00
 1 45 1 1.59 0.00
 1 45 2 -0.20 0.00
 1 45 3 0.94 0.00
 1 45 4 -1.36 0.00
 1 45 5 2.10 0.00
 1 45 6 -0.17 0.00
 1 45 7 -1.28 0.00
 1 45 8 -0.56 0.00
 1 47 0 -3.10 0.00
 1 47 1 0.44 0.00
 1 47 2 -4.08 0.00
 1 47 3 -2.24 0.00
 1 47 4 -0.92 0.00
 1 47 5 -0.21 0.00
 1 47 6 1.00 0.00
 2 0 0 374.51 0.00
 2 0 1 12.03 0.00
 2 0 2 -99.64 0.00
 2 0 3 -1.44 0.00
 2 0 4 -140.47 0.00
 2 0 5 -6.25 0.00
 2 0 6 7.48 0.00
 2 0 7 -31.15 0.00
 2 0 9 0.73 0.00
 2 0 10 -8.29 0.00
 2 0 11 -3.69 0.00
 2 0 12 5.71 0.00
 2 0 13 1.56 0.00
 2 0 14 -9.84 0.00
 2 0 15 2.08 0.00
 2 0 16 1.69 0.00
 2 0 17 -0.21 0.00
 2 0 18 -0.11 0.00
 2 0 19 1.05 0.00
 2 0 20 -3.41 0.00
 2 2 0 -385.61 0.00
 2 2 1 67.64 0.00
 2 2 2 -162.25 0.00
 2 2 3 43.10 0.00
 2 2 4 -62.91 0.00
 2 2 5 10.24 0.00
 2 2 6 21.07 0.00
 2 2 7 -12.65 0.00
 2 2 8 -1.39 0.00
 2 2 9 2.18 0.00
 2 2 10 -10.04 0.00
 2 2 11 -5.92 0.00
 2 2 12 7.26 0.00
 2 2 13 3.20 0.00
 2 2 14 -6.30 0.00
 2 2 15 1.93 0.00
 2 2 16 -0.27 0.00
 2 2 17 -2.68 0.00
 2 2 18 -0.16 0.00
 2 2 19 -0.88 0.00
 2 2 20 -2.31 0.00
 2 4 0 34.80 0.00
 2 4 1 -31.63 0.00
 2 4 2 74.78 0.00
 2 4 3 56.96 0.00
 2 4 4 69.34 0.00
 2 4 5 12.39 0.00
 2 4 6 49.68 0.00
 2 4 7 -7.22 0.00
 2 4 8 -4.37 0.00
 2 4 9 -5.90 0.00
 2 4 10 -3.64 0.00
 2 4 11 -3.43 0.00
 2 4 12 14.94 0.00
 2 4 13 0.99 0.00
 2 4 14 0.46 0.00
 2 4 15 -0.68 0.00
 2 4 16 1.86 0.00
 2 4 17 2.04 0.00
 2 4 18 3.63 0.00
 2 4 19 1.22 0.00
 2 4 20 -2.21 0.00
 2 6 0 -74.51 0.00
 2 6 1 28.51 0.00
 2 6 2 258.23 0.00
 2 6 3 23.38 0.00
 2 6 4 69.76 0.00
 2 6 5 -1.75 0.00
 2 6 6 23.85 0.00
 2 6 7 -6.54 0.00
 2 6 8 -15.60 0.00
 2 6 9 -8.65 0.00
 2 6 10 -9.16 0.00
 2 6 11 -2.17 0.00
 2 6 12 3.73 0.00
 2 6 13 -2.73 0.00
 2 6 14 -1.29 0.00
 2 6 15 -2.91 0.00
 2 6 16 -5.52 0.00
 2 6 17 -0.29 0.00
 2 6 18 2.88 0.00
 2 6 19 -0.61 0.00
 2 6 20 -4.32 0.00
 2 8 0 10.78 0.00
 2 8 1 28.93 0.00
 2 8 2 108.61 0.00
 2 8 3 7.32 0.00
 2 8 4 -47.79 0.00
 2 8 5 -11.56 0.00
 2 8 6 -8.21 0.00
 2 8 7 10.86 0.00
 2 8 8 -10.96 0.00
 2 8 9 -7.38 0.00
 2 8 10 -5.50 0.00
 2 8 11 1.15 0.00
 2 8 12 4.58 0.00
 2 8 13 0.72 0.00
 2 8 14 1.51 0.00
 2 8 15 0.61 0.00
 2 8 16 -5.87 0.00
 2 8 17 -3.98 0.00
 2 8 18 3.55 0.00
 2 8 19 -2.43 0.00
 2 8 20 0.28 0.00
 2 10 0 -56.19 0.00
 2 10 1 -50.62 0.00
 2 10 2 88.48 0.00
 2 10 3 -21.30 0.00
 2 10 4 -51.94 0.00
 2 10 5 -1.69 0.00
 2 10 6 -7.71 0.00
 2 10 7 18.28 0.00
 2 10 8 -7.19 0.00
 2 10 9 -1.90 0.00
 2 10 10 -7.42 0.00
 2 10 11 2.62 0.00
 2 10 12 -4.33 0.00
 2 10 13 1.91 0.00
 2 10 14 0.32 0.00
 2 10 15 0.42 0.00
 2 10 16 -5.55 0.00
 2 10 17 -1.62 0.00
 2 10 18 3.38 0.00
 2 10 19 -2.23 0.00
 2 10 20 -1.16 0.00
 2 12 0 -33.55 0.00
 2 12 1 -34.27 0.00
 2 12 2 22.97 0.00
 2 12 3 -4.98 0.00
 2 12 4 -18.01 0.00
 2 12 5 -15.48 0.00
 2 12 6 9.73 0.00
 2 12 7 22.75 0.00
 2 12 8 1.89 0.00
 2 12 9 0.61 0.00
 2 12 10 -1.46 0.00
 2 12 11 4.90 0.00
 2 12 12 -5.32 0.00
 2 12 13 -0.37 0.00
 2 12 14 0.04 0.00
 2 12 15 3.01 0.00
 2 12 16 -2.40 0.00
 2 12 17 -1.87 0.00
 2 12 18 0.20 0.00
 2 12 19 -0.82 0.00
 2 12 20 0.06 0.00
 2 14 0 -28.68 0.00
 2 14 1 -14.23 0.00
 2 14 2 -2.08 0.00
 2 14 3 -4.91 0.00
 2 14 4 1.68 0.00
 2 14 5 -3.31 0.00
 2 14 6 4.81 0.00
 2 14 7 10.87 0.00
 2 14 8 5.85 0.00
 2 14 9 -0.38 0.00
 2 14 10 1.97 0.00
 2 14 11 4.97 0.00
 2 14 12 -4.21 0.00
 2 14 13 3.48 0.00
 2 14 14 3.19 0.00
 2 14 15 3.11 0.00
 2 14 16 1.23 0.00
 2 14 17 2.49 0.00
 2 14 18 -2.70 0.00
 2 14 19 -2.47 0.00
 2 16 0 -18.85 0.00
 2 16 1 7.50 0.00
 2 16 2 -37.91 0.00
 2 16 3 25.71 0.00
 2 16 4 1.45 0.00
 2 16 5 0.81 0.00
 2 16 6 -4.28 0.00
 2 16 7 -5.01 0.00
 2 16 8 4.96 0.00
 2 16 9 2.67 0.00
 2 16 10 2.00 0.00
 2 16 11 5.97 0.00
 2 16 12 2.05 0.00
 2 16 13 -1.94 0.00
 2 16 14 -3.42 0.00
 2 16 15 2.41 0.00
 2 16 16 4.79 0.00
 2 16 17 0.17 0.00
 2 16 18 -0.16 0.00
 2 16 19 -3.76 0.00
 2 18 0 8.96 0.00
 2 18 1 10.00 0.00
 2 18 2 -15.53 0.00
 2 18 3 4.70 0.00
 2 18 4 16.65 0.00
 2 18 5 -7.61 0.00
 2 18 6 -4.39 0.00
 2 18 7 -6.51 0.00
 2 18 8 3.01 0.00
 2 18 9 2.86 0.00
 2 18 10 -2.75 0.00
 2 18 11 -1.36 0.00
 2 18 12 2.01 0.00
 2 18 13 -0.88 0.00
 2 18 14 -0.37 0.00
 2 18 15 3.80 0.00
 2 18 16 4.18 0.00
 2 18 17 6.08 0.00
 2 18 18 0.41 0.00
 2 18 19 -0.62 0.00
 2 20 0 17.58 0.00
 2 20 1 4.48 0.00
 2 20 2 -2.59 0.00
 2 20 3 -2.81 0.00
 2 20 4 22.38 0.00
 2 20 5 -11.68 0.00
 2 20 6 5.81 0.00
 2 20 7 -6.40 0.00
 2 20 8 -1.49 0.00
 2 20 9 -0.06 0.00
 2 20 10 -2.56 0.00
 2 20 11 -4.53 0.00
 2 20 12 -0.13 0.00
 2 20 13 -5.49 0.00
 2 20 14 -3.26 0.00
 2 20 15 0.45 0.00
 2 20 16 0.94 0.00
 2 20 17 5.35 0.00
 2 20 18 -0.42 0.00
 2 22 0 -0.26 0.00
 2 22 1 -6.57 0.00
 2 22 2 4.55 0.00
 2 22 3 -0.65 0.00
 2 22 4 1.64 0.00
 2 22 5 -3.95 0.00
 2 22 6 2.43 0.00
 2 22 7 -0.89 0.00
 2 22 8 -7.40 0.00
 2 22 9 -3.28 0.00
 2 22 10 -0.29 0.00
 2 22 11 -4.77 0.00
 2 22 12 1.89 0.00
 2 22 13 0.03 0.00
 2 22 14 2.17 0.00
 2 22 15 0.39 0.00
 2 22 16 -2.06 0.00
 2 22 17 -0.44 0.00
 2 22 18 -0.50 0.00
 2 24 0 -6.18 0.00
 2 24 1 -0.53 0.00
 2 24 2 3.17 0.00
 2 24 3 1.91 0.00
 2 24 4 -7.71 0.00
 2 24 5 1.25 0.00
 2 24 6 6.15 0.00
 2 24 7 5.24 0.00
 2 24 8 -1.17 0.00
 2 24 9 -1.22 0.00
 2 24 10 0.26 0.00
 2 24 11 -0.86 0.00
 2 24 12 0.65 0.00
 2 24 13 3.48 0.00
 2 24 14 1.72 0.00
 2 24 15 1.81 0.00
 2 24 16 -2.09 0.00
 2 24 17 -5.08 0.00
 2 26 0 -6.68 0.00
 2 26 1 0.33 0.00
 2 26 2 10.71 0.00
 2 26 3 -0.74 0.00
 2 26 4 -2.06 0.00
 2 26 5 -5.73 0.00
 2 26 6 4.13 0.00
 2 26 7 3.82 0.00
 2 26 8 -5.65 0.00
 2 26 9 3.02 0.00
 2 26 10 6.40 0.00
 2 26 11 3.32 0.00
 2 26 12 0.94 0.00
 2 26 13 -0.06 0.00
 2 26 14 -3.07 0.00
 2 26 15 1.82 0.00
 2 26 16 1.85 0.00
 2 26 17 -10.02 0.00
 2 28 0 0.61 0.00
 2 28 1 2.02 0.00
 2 28 2 6.48 0.00
 2 28 3 5.97 0.00
 2 28 4 -0.56 0.00
 2 28 5 -5.22 0.00
 2 28 6 3.83 0.00
 2 28 7 2.15 0.00
 2 28 8 -1.56 0.00
 2 28 9 0.06 0.00
 2 28 10 -3.38 0.00
 2 28 11 3.35 0.00
 2 28 12 -3.34 0.00
 2 28 13 -1.42 0.00
 2 28 14 -1.76 0.00
 2 28 15 2.47 0.00
 2 28 16 5.87 0.00
 2 30 0 -1.22 0.00
 2 30 1 2.02 0.00
 2 30 2 -4.59 0.00
 2 30 3 9.65 0.00
 2 30 4 -4.81 0.00
 2 30 5 0.24 0.00
 2 30 6 -3.75 0.00
 2 30 7 3.45 0.00
 2 30 8 -9.97 0.00
 2 30 9 -5.41 0.00
 2 30 10 -2.96 0.00
 2 30 11 3.95 0.00
 2 30 12 2.47 0.00
 2 30 13 -3.30 0.00
 2 30 14 -0.49 0.00
 2 30 15 -1.06 0.00
 2 30 16 4.35 0.00
 2 32 0 -5.16 0.00
 2 32 1 2.50 0.00
 2 32 2 -8.00 0.00
 2 32 3 7.53 0.00
 2 32 4 -1.83 0.00
 2 32 5 -3.11 0.00
 2 32 6 -5.16 0.00
 2 32 7 4.52 0.00
 2 32 8 -1.64 0.00
 2 32 9 1.02 0.00
 2 32 10 -2.55 0.00
 2 32 11 2.00 0.00
 2 32 12 0.99 0.00
 2 32 13 0.38 0.00
 2 32 14 2.86 0.00
 2 32 15 -2.01 0.00
 2 34 0 3.84 0.00
 2 34 1 -3.23 0.00
 2 34 2 -6.34 0.00
 2 34 3 -2.64 0.00
 2 34 4 2.59 0.00
 2 34 5 -3.04 0.00
 2 34 6 1.89 0.00
 2 34 7 0.15 0.00
 2 34 8 -0.73 0.00
 2 34 9 -1.60 0.00
 2 34 10 0.93 0.00
 2 34 11 0.01 0.00
 2 34 12 -0.62 0.00
 2 34 13 1.49 0.00
 2 34 14 -0.17 0.00
 2 36 0 6.11 0.00
 2 36 1 -0.78 0.00
 2 36 2 -2.88 0.00
 2 36 3 -3.73 0.00
 2 36 4 1.48 0.00
 2 36 5 0.85 0.00
 2 36 6 -1.78 0.00
 2 36 7 -2.09 0.00
 2 36 8 0.67 0.00
 2 36 9 1.97 0.00
 2 36 10 0.21 0.00
 2 36 11 -0.91 0.00
 2 36 12 -0.36 0.00
 2 36 13 -0.76 0.00
 2 36 14 -0.77 0.00
 2 38 0 0.68 0.00
 2 38 1 0.52 0.00
 2 38 2 -2.78 0.00
 2 38 3 1.89 0.00
 2 38 4 2.06 0.00
 2 38 5 0.80 0.00
 2 38 6 -3.55 0.00
 2 38 7 -1.87 0.00
 2 38 8 0.44 0.00
 2 38 9 0.57 0.00
 2 38 10 1.76 0.00
 2 38 11 -2.46 0.00
 2 38 12 -0.98 0.00
 2 38 13 0.70 0.00
 2 40 0 0.99 0.00
 2 40 1 1.64 0.00
 2 40 2 -1.06 0.00
 2 40 3 -3.02 0.00
 2 40 4 1.81 0.00
 2 40 5 -0.10 0.00
 2 40 6 0.23 0.00
 2 40 7 -3.57 0.00
 2 40 8 0.91 0.00
 2 40 9 1.14 0.00
 2 40 10 1.08 0.00
 2 40 11 1.23 0.00
 2 40 12 0.18 0.00
 2 42 0 -0.26 0.00
 2 42 1 1.24 0.00
 2 42 2 2.49 0.00
 2 42 3 -0.80 0.00
 2 42 4 2.92 0.00
 2 42 5 -2.07 0.00
 2 42 6 -0.70 0.00
 2 42 7 -1.42 0.00
 2 42 8 0.99 0.00
 2 42 9 -1.95 0.00
 2 42 10 -0.95 0.00
 2 44 0 0.73 0.00
 2 44 1 -1.33 0.00
 2 44 2 2.25 0.00
 2 44 3 -0.99 0.00
 2 44 4 0.16 0.00
 2 44 5 0.02 0.00
 2 44 6 1.98 0.00
 2 44 7 -2.92 0.00
 2 44 8 0.27 0.00
 2 44 9 0.35 0.00
 2 46 0 -9.83 0.00
 2 46 1 -0.04 0.00
 2 46 2 0.26 0.00
 2 46 3 -1.22 0.00
 2 46 4 -1.10 0.00
 2 46 5 0.35 0.00
 2 46 6 -2.47 0.00
 2 46 7 0.19 0.00
 2 48 0 -2.14 0.00
 2 48 1 1.37 0.00
 2 48 2 -2.11 0.00
 2 48 3 2.03 0.00
 2 48 4 -3.53 0.00
 3 1 0 -10.45 0.00
 3 1 1 -43.13 0.00
 3 1 2 -20.37 0.00
 3 1 3 -27.62 0.00
 3 1 4 9.70 0.00
 3 1 5 23.09 0.00
 3 1 6 -38.37 0.00
 3 1 7 -6.35 0.00
 3 1 8 21.46 0.00
 3 1 9 -2.17 0.00
 3 1 10 -6.14 0.00
 3 1 11 -2.10 0.00
 3 1 12 -2.09 0.00
 3 1 13 -1.35 0.00
 3 1 14 -0.37 0.00
 3 1 15 -1.34 0.00
 3 1 16 5.39 0.00
 3 1 17 -0.03 0.00
 3 1 18 -2.56 0.00
 3 1 19 -1.96 0.00
 3 1 20 2.13 0.00
 3 3 0 -161.97 0.00
 3 3 1 -110.73 0.00
 3 3 2 -18.57 0.00
 3 3 3 39.75 0.00
 3 3 4 24.78 0.00
 3 3 5 28.57 0.00
 3 3 6 -13.79 0.00
 3 3 7 0.98 0.00
 3 3 8 10.05 0.00
 3 3 9 0.42 0.00
 3 3 10 -4.79 0.00
 3 3 11 -0.77 0.00
 3 3 12 -0.17 0.00
 3 3 13 0.24 0.00
 3 3 14 1.74 0.00
 3 3 15 -2.29 0.00
 3 3 16 0.38 0.00
 3 3 17 0.37 0.00
 3 3 18 -0.37 0.00
 3 3 19 -2.68 0.00
 3 3 20 0.01 0.00
 3 5 0 73.10 0.00
 3 5 1 -150.68 0.00
 3 5 2 148.70 0.00
 3 5 3 90.90 0.00
 3 5 4 25.25 0.00
 3 5 5 14.55 0.00
 3 5 6 1.11 0.00
 3 5 7 -14.24 0.00
 3 5 8 1.77 0.00
 3 5 9 -0.16 0.00
 3 5 10 2.14 0.00
 3 5 11 2.15 0.00
 3 5 12 3.18 0.00
 3 5 13 0.14 0.00
 3 5 14 1.04 0.00
 3 5 15 -1.49 0.00
 3 5 16 -6.91 0.00
 3 5 17 3.80 0.00
 3 5 18 -3.89 0.00
 3 5 19 -1.26 0.00
 3 5 20 -5.25 0.00
 3 7 0 -35.52 0.00
 3 7 1 39.85 0.00
 3 7 2 73.97 0.00
 3 7 3 58.25 0.00
 3 7 4 -15.19 0.00
 3 7 5 -32.47 0.00
 3 7 6 16.74 0.00
 3 7 7 7.24 0.00
 3 7 8 -11.69 0.00
 3 7 9 7.43 0.00
 3 7 10 3.87 0.00
 3 7 11 -2.14 0.00
 3 7 12 0.87 0.00
 3 7 13 -0.28 0.00
 3 7 14 4.70 0.00
 3 7 15 0.09 0.00
 3 7 16 -5.93 0.00
 3 7 17 -1.24 0.00
 3 7 18 2.21 0.00
 3 7 19 -0.39 0.00
 3 7 20 -3.59 0.00
 3 9 0 -13.37 0.00
 3 9 1 -1.54 0.00
 3 9 2 58.36 0.00
 3 9 3 19.51 0.00
 3 9 4 -23.76 0.00
 3 9 5 -40.19 0.00
 3 9 6 14.77 0.00
 3 9 7 -0.86 0.00
 3 9 8 -5.38 0.00
 3 9 9 -1.00 0.00
 3 9 10 -4.17 0.00
 3 9 11 0.32 0.00
 3 9 12 -4.56 0.00
 3 9 13 5.39 0.00
 3 9 14 1.31 0.00
 3 9 15 2.56 0.00
 3 9 16 -2.58 0.00
 3 9 17 -2.37 0.00
 3 9 18 4.46 0.00
 3 9 19 -1.91 0.00
 3 9 20 0.46 0.00
 3 11 0 -19.29 0.00
 3 11 1 8.88 0.00
 3 11 2 24.28 0.00
 3 11 3 -2.18 0.00
 3 11 4 -16.31 0.00
 3 11 5 -23.37 0.00
 3 11 6 10.17 0.00
 3 11 7 5.81 0.00
 3 11 8 -3.53 0.00
 3 11 9 1.83 0.00
 3 11 10 0.14 0.00
 3 11 11 0.75 0.00
 3 11 12 -1.71 0.00
 3 11 13 -2.22 0.00
 3 11 14 2.63 0.00
 3 11 15 2.51 0.00
 3 11 16 -0.67 0.00
 3 11 17 -2.44 0.00
 3 11 18 3.82 0.00
 3 11 19 -1.29 0.00
 3 11 20 0.87 0.00
 3 13 0 -14.88 0.00
 3 13 1 4.61 0.00
 3 13 2 3.22 0.00
 3 13 3 9.89 0.00
 3 13 4 -17.96 0.00
 3 13 5 1.98 0.00
 3 13 6 -3.11 0.00
 3 13 7 7.22 0.00
 3 13 8 -3.19 0.00
 3 13 9 -1.47 0.00
 3 13 10 1.83 0.00
 3 13 11 -4.24 0.00
 3 13 12 0.24 0.00
 3 13 13 -3.95 0.00
 3 13 14 3.12 0.00
 3 13 15 -0.53 0.00
 3 13 16 -0.43 0.00
 3 13 17 -2.01 0.00
 3 13 18 -4.16 0.00
 3 13 19 -1.56 0.00
 3 15 0 -17.67 0.00
 3 15 1 15.06 0.00
 3 15 2 -30.91 0.00
 3 15 3 -1.87 0.00
 3 15 4 6.95 0.00
 3 15 5 6.41 0.00
 3 15 6 -11.47 0.00
 3 15 7 0.57 0.00
 3 15 8 -3.20 0.00
 3 15 9 2.04 0.00
 3 15 10 5.13 0.00
 3 15 11 -0.45 0.00
 3 15 12 2.45 0.00
 3 15 13 -0.94 0.00
 3 15 14 0.59 0.00
 3 15 15 -0.32 0.00
 3 15 16 4.52 0.00
 3 15 17 0.32 0.00
 3 15 18 -6.75 0.00
 3 15 19 -2.25 0.00
 3 17 0 14.60 0.00
 3 17 1 0.84 0.00
 3 17 2 -17.20 0.00
 3 17 3 -6.12 0.00
 3 17 4 10.47 0.00
 3 17 5 4.07 0.00
 3 17 6 -5.46 0.00
 3 17 7 -3.93 0.00
 3 17 8 6.11 0.00
 3 17 9 3.92 0.00
 3 17 10 1.96 0.00
 3 17 11 3.67 0.00
 3 17 12 -2.90 0.00
 3 17 13 2.30 0.00
 3 17 14 -2.14 0.00
 3 17 15 -4.87 0.00
 3 17 16 6.90 0.00
 3 17 17 -0.80 0.00
 3 17 18 -4.81 0.00
 3 17 19 -1.12 0.00
 3 19 0 21.39 0.00
 3 19 1 -2.22 0.00
 3 19 2 -10.52 0.00
 3 19 3 -17.95 0.00
 3 19 4 3.54 0.00
 3 19 5 6.00 0.00
 3 19 6 -12.48 0.00
 3 19 7 1.16 0.00
 3 19 8 11.02 0.00
 3 19 9 0.07 0.00
 3 19 10 -0.43 0.00
 3 19 11 2.94 0.00
 3 19 12 -0.04 0.00
 3 19 13 3.26 0.00
 3 19 14 0.18 0.00
 3 19 15 -1.82 0.00
 3 19 16 5.58 0.00
 3 19 17 -0.04 0.00
 3 19 18 -5.20 0.00
 3 21 0 13.05 0.00
 3 21 1 6.19 0.00
 3 21 2 -6.86 0.00
 3 21 3 2.56 0.00
 3 21 4 4.41 0.00
 3 21 5 8.26 0.00
 3 21 6 1.78 0.00
 3 21 7 -2.48 0.00
 3 21 8 1.71 0.00
 3 21 9 -2.56 0.00
 3 21 10 -0.58 0.00
 3 21 11 -0.98 0.00
 3 21 12 0.48 0.00
 3 21 13 1.16 0.00
 3 21 14 1.15 0.00
 3 21 15 -0.30 0.00
 3 21 16 2.07 0.00
 3 21 17 2.15 0.00
 3 21 18 -0.38 0.00
 3 23 0 -0.74 0.00
 3 23 1 -3.44 0.00
 3 23 2 9.48 0.00
 3 23 3 -9.50 0.00
 3 23 4 -1.98 0.00
 3 23 5 -3.34 0.00
 3 23 6 9.01 0.00
 3 23 7 -1.55 0.00
 3 23 8 1.86 0.00
 3 23 9 -7.59 0.00
 3 23 10 -2.50 0.00
 3 23 11 -2.32 0.00
 3 23 12 -0.10 0.00
 3 23 13 1.08 0.00
 3 23 14 0.06 0.00
 3 23 15 1.18 0.00
 3 23 16 -5.48 0.00
 3 23 17 1.36 0.00
 3 25 0 0.90 0.00
 3 25 1 1.86 0.00
 3 25 2 4.30 0.00
 3 25 3 -1.53 0.00
 3 25 4 -5.66 0.00
 3 25 5 -4.05 0.00
 3 25 6 2.97 0.00
 3 25 7 -2.45 0.00
 3 25 8 -0.53 0.00
 3 25 9 -4.94 0.00
 3 25 10 -0.85 0.00
 3 25 11 2.61 0.00
 3 25 12 -3.15 0.00
 3 25 13 -0.21 0.00
 3 25 14 2.16 0.00
 3 25 15 0.61 0.00
 3 25 16 0.26 0.00
 3 25 17 -9.71 0.00
 3 27 0 -6.91 0.00
 3 27 1 -1.33 0.00
 3 27 2 9.09 0.00
 3 27 3 -1.70 0.00
 3 27 4 -4.11 0.00
 3 27 5 -4.35 0.00
 3 27 6 3.83 0.00
 3 27 7 -0.36 0.00
 3 27 8 -2.55 0.00
 3 27 9 -2.16 0.00
 3 27 10 4.97 0.00
 3 27 11 3.22 0.00
 3 27 12 1.30 0.00
 3 27 13 -4.69 0.00
 3 27 14 -0.59 0.00
 3 27 15 0.11 0.00
 3 27 16 -2.83 0.00
 3 29 0 -3.56 0.00
 3 29 1 4.51 0.00
 3 29 2 4.21 0.00
 3 29 3 -1.39 0.00
 3 29 4 -3.34 0.00
 3 29 5 -1.94 0.00
 3 29 6 0.82 0.00
 3 29 7 1.15 0.00
 3 29 8 5.90 0.00
 3 29 9 -6.83 0.00
 3 29 10 5.45 0.00
 3 29 11 2.25 0.00
 3 29 12 6.07 0.00
 3 29 13 -1.66 0.00
 3 29 14 0.12 0.00
 3 29 15 3.06 0.00
 3 29 16 2.12 0.00
 3 31 0 -5.40 0.00
 3 31 1 0.50 0.00
 3 31 2 1.79 0.00
 3 31 3 1.31 0.00
 3 31 4 0.96 0.00
 3 31 5 -0.24 0.00
 3 31 6 -0.69 0.00
 3 31 7 1.85 0.00
 3 31 8 0.25 0.00
 3 31 9 -5.66 0.00
 3 31 10 2.18 0.00
 3 31 11 1.09 0.00
 3 31 12 4.68 0.00
 3 31 13 0.23 0.00
 3 31 14 -2.18 0.00
 3 31 15 -1.19 0.00
 3 33 0 -1.41 0.00
 3 33 1 2.94 0.00
 3 33 2 -0.78 0.00
 3 33 3 0.94 0.00
 3 33 4 -1.74 0.00
 3 33 5 1.33 0.00
 3 33 6 -2.57 0.00
 3 33 7 1.34 0.00
 3 33 8 1.88 0.00
 3 33 9 -1.43 0.00
 3 33 10 -1.18 0.00
 3 33 11 0.85 0.00
 3 33 12 -2.67 0.00
 3 33 13 2.42 0.00
 3 33 14 0.65 0.00
 3 33 15 0.09 0.00
 3 35 0 6.26 0.00
 3 35 1 6.66 0.00
 3 35 2 -2.68 0.00
 3 35 3 -0.69 0.00
 3 35 4 0.62 0.00
 3 35 5 -0.46 0.00
 3 35 6 -1.60 0.00
 3 35 7 -1.14 0.00
 3 35 8 -1.54 0.00
 3 35 9 -0.37 0.00
 3 35 10 -3.72 0.00
 3 35 11 1.50 0.00
 3 35 12 0.05 0.00
 3 35 13 1.76 0.00
 3 35 14 2.72 0.00
 3 37 0 9.26 0.00
 3 37 1 -0.55 0.00
 3 37 2 3.10 0.00
 3 37 3 -2.77 0.00
 3 37 4 1.87 0.00
 3 37 5 2.86 0.00
 3 37 6 -4.97 0.00
 3 37 7 -0.33 0.00
 3 37 8 -4.81 0.00
 3 37 9 4.39 0.00
 3 37 10 -0.76 0.00
 3 37 11 0.98 0.00
 3 37 12 -3.46 0.00
 3 37 13 4.35 0.00
 3 39 0 4.28 0.00
 3 39 1 -2.16 0.00
 3 39 2 2.47 0.00
 3 39 3 -2.19 0.00
 3 39 4 -0.14 0.00
 3 39 5 0.22 0.00
 3 39 6 -5.90 0.00
 3 39 7 -1.76 0.00
 3 39 8 -1.84 0.00
 3 39 9 3.00 0.00
 3 39 10 -4.54 0.00
 3 39 11 0.32 0.00
 3 39 12 -3.16 0.00
 3 41 0 0.62 0.00
 3 41 1 -1.23 0.00
 3 41 2 -1.35 0.00
 3 41 3 -3.74 0.00
 3 41 4 -1.50 0.00
 3 41 5 -0.54 0.00
 3 41 6 -0.31 0.00
 3 41 7 -1.87 0.00
 3 41 8 -0.59 0.00
 3 41 9 2.97 0.00
 3 41 10 1.40 0.00
 3 41 11 0.78 0.00
 3 43 0 -1.30 0.00
 3 43 1 -1.06 0.00
 3 43 2 0.84 0.00
 3 43 3 -1.88 0.00
 3 43 4 0.07 0.00
 3 43 5 -2.24 0.00
 3 43 6 2.26 0.00
 3 43 7 -1.85 0.00
 3 43 8 3.69 0.00
 3 43 9 0.21 0.00
 3 43 10 1.26 0.00
 3 45 0 0.63 0.00
 3 45 1 -4.04 0.00
 3 45 2 1.98 0.00
 3 45 3 -1.86 0.00
 3 45 4 0.16 0.00
 3 45 5 -2.40 0.00
 3 45 6 1.08 0.00
 3 45 7 1.53 0.00
 3 45 8 1.08 0.00
 3 47 0 1.40 0.00
 3 47 1 -2.43 0.00
 3 47 2 -0.66 0.00
 3 47 3 1.12 0.00
 3 47 4 -1.11 0.00
 3 47 5 1.37 0.00
 3 47 6 1.14 0.00
 3 49 0 -0.98 0.00
 3 49 1 3.76 0.00
 3 49 2 0.06 0.00
 4 0 0 465.73 0.00
 4 0 1 -22.38 0.00
 4 0 2 36.61 0.00
 4 0 3 -4.38 0.00
 4 0 4 60.53 0.00
 4 0 5 -2.56 0.00
 4 0 6 -29.38 0.00
 4 0 7 -3.09 0.00
 4 0 8 0.04 0.00
 4 0 9 15.56 0.00
 4 0 10 4.54 0.00
 4 0 11 -12.80 0.00
 4 0 12 0.57 0.00
 4 0 13 1.45 0.00
 4 0 14 -0.21 0.00
 4 0 15 1.76 0.00
 4 0 16 6.26 0.00
 4 0 17 3.20 0.00
 4 0 18 -9.01 0.00
 4 0 19 1.53 0.00
 4 0 20 1.33 0.00
 4 2 0 -27.23 0.00
 4 2 1 -13.07 0.00
 4 2 2 -22.93 0.00
 4 2 3 6.29 0.00
 4 2 4 66.82 0.00
 4 2 5 -8.57 0.00
 4 2 6 -30.19 0.00
 4 2 7 2.28 0.00
 4 2 8 -11.28 0.00
 4 2 9 10.56 0.00
 4 2 10 7.94 0.00
 4 2 11 -13.11 0.00
 4 2 12 -5.08 0.00
 4 2 13 3.18 0.00
 4 2 14 -1.73 0.00
 4 2 15 0.48 0.00
 4 2 16 5.43 0.00
 4 2 17 -0.85 0.00
 4 2 18 -5.27 0.00
 4 2 19 -1.90 0.00
 4 2 20 2.59 0.00
 4 4 0 29.51 0.00
 4 4 1 -45.28 0.00
 4 4 2 -40.89 0.00
 4 4 3 18.83 0.00
 4 4 4 37.02 0.00
 4 4 5 -7.62 0.00
 4 4 6 -29.70 0.00
 4 4 7 -7.12 0.00
 4 4 8 -5.22 0.00
 4 4 9 8.28 0.00
 4 4 10 4.08 0.00
 4 4 11 -3.23 0.00
 4 4 12 -2.99 0.00
 4 4 13 4.29 0.00
 4 4 14 -2.39 0.00
 4 4 15 -1.06 0.00
 4 4 16 4.09 0.00
 4 4 17 -1.26 0.00
 4 4 18 -3.21 0.00
 4 4 19 0.46 0.00
 4 4 20 -2.02 0.00
 4 6 0 -132.65 0.00
 4 6 1 16.50 0.00
 4 6 2 -6.47 0.00
 4 6 3 15.23 0.00
 4 6 4 -9.63 0.00
 4 6 5 -5.74 0.00
 4 6 6 -14.19 0.00
 4 6 7 -15.48 0.00
 4 6 8 -0.19 0.00
 4 6 9 2.62 0.00
 4 6 10 9.19 0.00
 4 6 11 0.61 0.00
 4 6 12 -7.01 0.00
 4 6 13 -0.64 0.00
 4 6 14 -0.23 0.00
 4 6 15 0.13 0.00
 4 6 16 -1.75 0.00
 4 6 17 -0.43 0.00
 4 6 18 -2.13 0.00
 4 6 19 0.63 0.00
 4 6 20 -2.95 0.00
 4 8 0 -28.77 0.00
 4 8 1 27.02 0.00
 4 8 2 -25.21 0.00
 4 8 3 24.76 0.00
 4 8 4 -31.43 0.00
 4 8 5 8.59 0.00
 4 8 6 -0.16 0.00
 4 8 7 -8.11 0.00
 4 8 8 8.66 0.00
 4 8 9 0.28 0.00
 4 8 10 3.54 0.00
 4 8 11 3.81 0.00
 4 8 12 -2.87 0.00
 4 8 13 1.14 0.00
 4 8 14 6.84 0.00
 4 8 15 3.43 0.00
 4 8 16 2.25 0.00
 4 8 17 -3.01 0.00
 4 8 18 0.67 0.00
 4 8 19 0.34 0.00
 4 8 20 0.44 0.00
 4 10 0 -23.00 0.00
 4 10 1 38.54 0.00
 4 10 2 0.35 0.00
 4 10 3 15.54 0.00
 4 10 4 -19.86 0.00
 4 10 5 -1.60 0.00
 4 10 6 8.19 0.00
 4 10 7 -10.56 0.00
 4 10 8 -1.16 0.00
 4 10 9 -0.75 0.00
 4 10 10 0.29 0.00
 4 10 11 2.62 0.00
 4 10 12 -5.10 0.00
 4 10 13 -5.92 0.00
 4 10 14 6.57 0.00
 4 10 15 0.61 0.00
 4 10 16 1.54 0.00
 4 10 17 0.62 0.00
 4 10 18 2.38 0.00
 4 10 19 -2.36 0.00
 4 10 20 -1.55 0.00
 4 12 0 10.73 0.00
 4 12 1 25.00 0.00
 4 12 2 3.22 0.00
 4 12 3 14.32 0.00
 4 12 4 3.37 0.00
 4 12 5 -10.41 0.00
 4 12 6 2.32 0.00
 4 12 7 -5.75 0.00
 4 12 8 -2.77 0.00
 4 12 9 -2.72 0.00
 4 12 10 7.36 0.00
 4 12 11 5.65 0.00
 4 12 12 -4.02 0.00
 4 12 13 -2.26 0.00
 4 12 14 3.62 0.00
 4 12 15 3.32 0.00
 4 12 16 -0.22 0.00
 4 12 17 -2.38 0.00
 4 12 18 -1.78 0.00
 4 12 19 -2.07 0.00
 4 14 0 33.22 0.00
 4 14 1 -0.55 0.00
 4 14 2 -0.25 0.00
 4 14 3 -8.99 0.00
 4 14 4 11.58 0.00
 4 14 5 -0.87 0.00
 4 14 6 -3.61 0.00
 4 14 7 -4.38 0.00
 4 14 8 -5.59 0.00
 4 14 9 -4.53 0.00
 4 14 10 3.04 0.00
 4 14 11 1.35 0.00
 4 14 12 -4.04 0.00
 4 14 13 -0.77 0.00
 4 14 14 1.00 0.00
 4 14 15 3.70 0.00
 4 14 16 -2.47 0.00
 4 14 17 -1.04 0.00
 4 14 18 -4.46 0.00
 4 14 19 -4.28 0.00
 4 16 0 34.64 0.00
 4 16 1 -5.95 0.00
 4 16 2 -11.24 0.00
 4 16 3 1.05 0.00
 4 16 4 5.83 0.00
 4 16 5 3.76 0.00
 4 16 6 -10.88 0.00
 4 16 7 -5.07 0.00
 4 16 8 -6.54 0.00
 4 16 9 -0.61 0.00
 4 16 10 1.42 0.00
 4 16 11 -0.71 0.00
 4 16 12 0.29 0.00
 4 16 13 -0.97 0.00
 4 16 14 -6.29 0.00
 4 16 15 1.74 0.00
 4 16 16 -2.28 0.00
 4 16 17 -3.17 0.00
 4 16 18 -3.26 0.00
 4 16 19 -5.08 0.00
 4 18 0 34.91 0.00
 4 18 1 -2.90 0.00
 4 18 2 -16.51 0.00
 4 18 3 -11.23 0.00
 4 18 4 -3.75 0.00
 4 18 5 3.55 0.00
 4 18 6 -8.74 0.00
 4 18 7 4.41 0.00
 4 18 8 4.81 0.00
 4 18 9 1.79 0.00
 4 18 10 1.06 0.00
 4 18 11 -5.97 0.00
 4 18 12 6.46 0.00
 4 18 13 3.13 0.00
 4 18 14 -2.21 0.00
 4 18 15 1.10 0.00
 4 18 16 -1.87 0.00
 4 18 17 -2.07 0.00
 4 18 18 0.80 0.00
 4 20 0 11.51 0.00
 4 20 1 8.89 0.00
 4 20 2 -16.50 0.00
 4 20 3 -3.96 0.00
 4 20 4 -2.59 0.00
 4 20 5 8.80 0.00
 4 20 6 -1.80 0.00
 4 20 7 7.04 0.00
 4 20 8 1.53 0.00
 4 20 9 4.42 0.00
 4 20 10 4.94 0.00
 4 20 11 0.80 0.00
 4 20 12 6.22 0.00
 4 20 13 6.34 0.00
 4 20 14 0.43 0.00
 4 20 15 -2.82 0.00
 4 20 16 -2.39 0.00
 4 20 17 0.77 0.00
 4 20 18 1.69 0.00
 4 22 0 13.04 0.00
 4 22 1 -1.45 0.00
 4 22 2 5.59 0.00
 4 22 3 -4.60 0.00
 4 22 4 -1.79 0.00
 4 22 5 2.89 0.00
 4 22 6 0.63 0.00
 4 22 7 2.22 0.00
 4 22 8 -0.05 0.00
 4 22 9 3.05 0.00
 4 22 10 -0.77 0.00
 4 22 11 1.90 0.00
 4 22 12 -0.07 0.00
 4 22 13 7.03 0.00
 4 22 14 1.67 0.00
 4 22 15 -2.57 0.00
 4 22 16 -0.57 0.00
 4 22 17 5.74 0.00
 4 24 0 -0.81 0.00
 4 24 1 7.12 0.00
 4 24 2 0.20 0.00
 4 24 3 -0.58 0.00
 4 24 4 -10.02 0.00
 4 24 5 6.16 0.00
 4 24 6 2.71 0.00
 4 24 7 -1.66 0.00
 4 24 8 -0.48 0.00
 4 24 9 -2.81 0.00
 4 24 10 -3.82 0.00
 4 24 11 -2.40 0.00
 4 24 12 -4.11 0.00
 4 24 13 -0.61 0.00
 4 24 14 1.86 0.00
 4 24 15 -2.74 0.00
 4 24 16 -0.07 0.00
 4 24 17 3.77 0.00
 4 26 0 -7.77 0.00
 4 26 1 1.21 0.00
 4 26 2 0.88 0.00
 4 26 3 -2.16 0.00
 4 26 4 -7.71 0.00
 4 26 5 -0.52 0.00
 4 26 6 -5.11 0.00
 4 26 7 -2.02 0.00
 4 26 8 -4.29 0.00
 4 26 9 1.06 0.00
 4 26 10 3.16 0.00
 4 26 11 -0.95 0.00
 4 26 12 1.42 0.00
 4 26 13 -4.23 0.00
 4 26 14 0.66 0.00
 4 26 15 0.69 0.00
 4 26 16 -0.46 0.00
 4 26 17 -4.36 0.00
 4 28 0 3.47 0.00
 4 28 1 -0.68 0.00
 4 28 2 1.98 0.00
 4 28 3 -2.68 0.00
 4 28 4 -2.30 0.00
 4 28 5 -4.87 0.00
 4 28 6 3.80 0.00
 4 28 7 -3.19 0.00
 4 28 8 3.39 0.00
 4 28 9 0.21 0.00
 4 28 10 1.01 0.00
 4 28 11 2.90 0.00
 4 28 12 1.76 0.00
 4 28 13 -2.16 0.00
 4 28 14 1.43 0.00
 4 28 15 1.33 0.00
 4 28 16 -3.99 0.00
 4 30 0 0.75 0.00
 4 30 1 -5.45 0.00
 4 30 2 -0.50 0.00
 4 30 3 0.61 0.00
 4 30 4 1.19 0.00
 4 30 5 -0.18 0.00
 4 30 6 4.14 0.00
 4 30 7 1.95 0.00
 4 30 8 6.26 0.00
 4 30 9 -2.40 0.00
 4 30 10 1.90 0.00
 4 30 11 4.77 0.00
 4 30 12 3.87 0.00
 4 30 13 -2.73 0.00
 4 30 14 -1.89 0.00
 4 30 15 -2.54 0.00
 4 30 16 -2.49 0.00
 4 32 0 2.21 0.00
 4 32 1 1.39 0.00
 4 32 2 -0.49 0.00
 4 32 3 3.66 0.00
 4 32 4 1.48 0.00
 4 32 5 -2.63 0.00
 4 32 6 -3.40 0.00
 4 32 7 4.63 0.00
 4 32 8 2.34 0.00
 4 32 9 1.21 0.00
 4 32 10 -2.05 0.00
 4 32 11 2.47 0.00
 4 32 12 0.29 0.00
 4 32 13 1.37 0.00
 4 32 14 0.56 0.00
 4 32 15 -1.57 0.00
 4 34 0 2.02 0.00
 4 34 1 2.82 0.00
 4 34 2 -0.77 0.00
 4 34 3 0.19 0.00
 4 34 4 -0.01 0.00
 4 34 5 -1.05 0.00
 4 34 6 -3.94 0.00
 4 34 7 0.21 0.00
 4 34 8 -0.24 0.00
 4 34 9 -3.26 0.00
 4 34 10 -1.73 0.00
 4 34 11 -1.29 0.00
 4 34 12 2.19 0.00
 4 34 13 1.85 0.00
 4 34 14 0.00 0.00
 4 36 0 9.74 0.00
 4 36 1 10.94 0.00
 4 36 2 2.09 0.00
 4 36 3 4.05 0.00
 4 36 4 0.30 0.00
 4 36 5 0.76 0.00
 4 36 6 -1.70 0.00
 4 36 7 -0.96 0.00
 4 36 8 0.07 0.00
 4 36 9 0.50 0.00
 4 36 10 -2.56 0.00
 4 36 11 -0.98 0.00
 4 36 12 0.27 0.00
 4 36 13 -0.20 0.00
 4 38 0 2.00 0.00
 4 38 1 5.17 0.00
 4 38 2 1.92 0.00
 4 38 3 3.95 0.00
 4 38 4 0.26 0.00
 4 38 5 -0.85 0.00
 4 38 6 -3.70 0.00
 4 38 7 -1.09 0.00
 4 38 8 -1.53 0.00
 4 38 9 0.39 0.00
 4 38 10 -2.83 0.00
 4 38 11 -2.11 0.00
 4 38 12 1.69 0.00
 4 40 0 -3.27 0.00
 4 40 1 3.24 0.00
 4 40 2 -2.82 0.00
 4 40 3 0.39 0.00
 4 40 4 -1.80 0.00
 4 40 5 -1.60 0.00
 4 40 6 -0.42 0.00
 4 40 7 -1.01 0.00
 4 40 8 -1.29 0.00
 4 40 9 1.02 0.00
 4 40 10 0.18 0.00
 4 40 11 -1.32 0.00
 4 42 0 -2.17 0.00
 4 42 1 0.68 0.00
 4 42 2 -1.38 0.00
 4 42 3 -0.06 0.00
 4 42 4 -3.08 0.00
 4 42 5 -0.61 0.00
 4 42 6 -0.85 0.00
 4 42 7 0.74 0.00
 4 42 8 2.05 0.00
 4 42 9 -2.03 0.00
 4 42 10 2.46 0.00
 4 44 0 2.31 0.00
 4 44 1 -2.27 0.00
 4 44 2 1.40 0.00
 4 44 3 -2.42 0.00
 4 44 4 -2.09 0.00
 4 44 5 -0.76 0.00
 4 44 6 3.29 0.00
 4 44 7 0.20 0.00
 4 44 8 3.51 0.00
 4 46 0 -1.67 0.00
 4 46 1 -1.84 0.00
 4 46 2 1.77 0.00
 4 46 3 -3.04 0.00
 4 46 4 0.78 0.00
 4 46 5 -1.18 0.00
 4 46 6 0.61 0.00
 4 48 0 3.60 0.00
 4 48 1 2.20 0.00
 4 48 2 0.32 0.00
 4 48 3 2.33 0.00
 5 1 0 140.53 0.00
 5 1 1 67.47 0.00
 5 1 2 -9.64 0.00
 5 1 3 -55.98 0.00
 5 1 4 49.25 0.00
 5 1 5 -3.37 0.00
 5 1 6 -21.00 0.00
 5 1 7 -15.65 0.00
 5 1 8 16.23 0.00
 5 1 9 10.44 0.00
 5 1 10 -5.11 0.00
 5 1 11 1.72 0.00
 5 1 12 -1.71 0.00
 5 1 13 -5.59 0.00
 5 1 14 1.33 0.00
 5 1 15 4.03 0.00
 5 1 16 2.33 0.00
 5 1 17 3.41 0.00
 5 1 18 -5.15 0.00
 5 1 19 -6.50 0.00
 5 1 20 -0.12 0.00
 5 3 0 1.46 0.00
 5 3 1 39.72 0.00
 5 3 2 -45.80 0.00
 5 3 3 -9.08 0.00
 5 3 4 24.31 0.00
 5 3 5 -1.05 0.00
 5 3 6 -17.60 0.00
 5 3 7 -14.52 0.00
 5 3 8 4.04 0.00
 5 3 9 1.37 0.00
 5 3 10 -5.31 0.00
 5 3 11 1.67 0.00
 5 3 12 -8.15 0.00
 5 3 13 -2.46 0.00
 5 3 14 0.21 0.00
 5 3 15 4.06 0.00
 5 3 16 2.10 0.00
 5 3 17 3.27 0.00
 5 3 18 1.59 0.00
 5 3 19 -5.37 0.00
 5 3 20 0.71 0.00
 5 5 0 7.94 0.00
 5 5 1 35.49 0.00
 5 5 2 -12.03 0.00
 5 5 3 25.90 0.00
 5 5 4 -2.26 0.00
 5 5 5 -9.84 0.00
 5 5 6 -14.10 0.00
 5 5 7 -29.56 0.00
 5 5 8 -4.94 0.00
 5 5 9 -3.15 0.00
 5 5 10 3.88 0.00
 5 5 11 6.79 0.00
 5 5 12 -5.41 0.00
 5 5 13 -0.52 0.00
 5 5 14 0.63 0.00
 5 5 15 3.62 0.00
 5 5 16 -1.84 0.00
 5 5 17 1.48 0.00
 5 5 18 2.21 0.00
 5 5 19 -3.56 0.00
 5 5 20 0.08 0.00
 5 7 0 -27.93 0.00
 5 7 1 40.05 0.00
 5 7 2 -14.44 0.00
 5 7 3 -0.73 0.00
 5 7 4 2.16 0.00
 5 7 5 -3.91 0.00
 5 7 6 1.14 0.00
 5 7 7 2.16 0.00
 5 7 8 -16.68 0.00
 5 7 9 -0.39 0.00
 5 7 10 10.88 0.00
 5 7 11 0.63 0.00
 5 7 12 -6.44 0.00
 5 7 13 -3.37 0.00
 5 7 14 4.01 0.00
 5 7 15 3.20 0.00
 5 7 16 -0.72 0.00
 5 7 17 -3.15 0.00
 5 7 18 1.87 0.00
 5 7 19 -0.06 0.00
 5 7 20 -0.68 0.00
 5 9 0 -8.93 0.00
 5 9 1 1.04 0.00
 5 9 2 15.97 0.00
 5 9 3 -10.23 0.00
 5 9 4 -2.44 0.00
 5 9 5 -2.05 0.00
 5 9 6 -4.29 0.00
 5 9 7 -1.71 0.00
 5 9 8 -12.15 0.00
 5 9 9 -3.81 0.00
 5 9 10 5.81 0.00
 5 9 11 -1.89 0.00
 5 9 12 -3.05 0.00
 5 9 13 -3.06 0.00
 5 9 14 2.31 0.00
 5 9 15 4.82 0.00
 5 9 16 -0.14 0.00
 5 9 17 -1.42 0.00
 5 9 18 -0.57 0.00
 5 9 19 2.92 0.00
 5 11 0 -3.51 0.00
 5 11 1 0.48 0.00
 5 11 2 -5.41 0.00
 5 11 3 -0.76 0.00
 5 11 4 -10.55 0.00
 5 11 5 5.25 0.00
 5 11 6 3.56 0.00
 5 11 7 2.28 0.00
 5 11 8 -1.12 0.00
 5 11 9 -0.99 0.00
 5 11 10 12.03 0.00
 5 11 11 -2.37 0.00
 5 11 12 -0.51 0.00
 5 11 13 -7.97 0.00
 5 11 14 -0.78 0.00
 5 11 15 5.38 0.00
 5 11 16 -0.42 0.00
 5 11 17 -0.42 0.00
 5 11 18 -1.51 0.00
 5 11 19 1.38 0.00
 5 13 0 -0.89 0.00
 5 13 1 -12.94 0.00
 5 13 2 7.28 0.00
 5 13 3 -0.14 0.00
 5 13 4 -5.59 0.00
 5 13 5 1.40 0.00
 5 13 6 10.67 0.00
 5 13 7 -6.04 0.00
 5 13 8 3.68 0.00
 5 13 9 1.20 0.00
 5 13 10 7.47 0.00
 5 13 11 -0.56 0.00
 5 13 12 1.71 0.00
 5 13 13 0.42 0.00
 5 13 14 0.60 0.00
 5 13 15 4.50 0.00
 5 13 16 0.97 0.00
 5 13 17 -4.32 0.00
 5 13 18 -1.95 0.00
 5 13 19 1.48 0.00
 5 15 0 13.13 0.00
 5 15 1 -6.44 0.00
 5 15 2 -0.46 0.00
 5 15 3 -8.52 0.00
 5 15 4 15.42 0.00
 5 15 5 -3.59 0.00
 5 15 6 2.04 0.00
 5 15 7 -4.81 0.00
 5 15 8 -10.19 0.00
 5 15 9 3.72 0.00
 5 15 10 -3.69 0.00
 5 15 11 1.93 0.00
 5 15 12 2.81 0.00
 5 15 13 2.31 0.00
 5 15 14 -1.22 0.00
 5 15 15 1.19 0.00
 5 15 16 3.37 0.00
 5 15 17 -3.24 0.00
 5 15 18 -5.65 0.00
 5 15 19 1.43 0.00
 5 17 0 26.94 0.00
 5 17 1 -2.13 0.00
 5 17 2 7.15 0.00
 5 17 3 -12.96 0.00
 5 17 4 9.72 0.00
 5 17 5 -8.56 0.00
 5 17 6 6.41 0.00
 5 17 7 -6.19 0.00
 5 17 8 -1.99 0.00
 5 17 9 2.83 0.00
 5 17 10 -8.66 0.00
 5 17 11 -2.66 0.00
 5 17 12 0.96 0.00
 5 17 13 2.09 0.00
 5 17 14 -3.10 0.00
 5 17 15 -4.65 0.00
 5 17 16 0.62 0.00
 5 17 17 -1.02 0.00
 5 17 18 -5.26 0.00
 5 19 0 7.29 0.00
 5 19 1 11.44 0.00
 5 19 2 -10.44 0.00
 5 19 3 -4.91 0.00
 5 19 4 -7.60 0.00
 5 19 5 4.28 0.00
 5 19 6 -5.00 0.00
 5 19 7 1.42 0.00
 5 19 8 2.28 0.00
 5 19 9 0.16 0.00
 5 19 10 -8.49 0.00
 5 19 11 0.21 0.00
 5 19 12 6.34 0.00
 5 19 13 2.70 0.00
 5 19 14 -2.42 0.00
 5 19 15 -1.35 0.00
 5 19 16 -1.16 0.00
 5 19 17 -1.65 0.00
 5 19 18 -2.06 0.00
 5 21 0 3.14 0.00
 5 21 1 17.31 0.00
 5 21 2 -5.08 0.00
 5 21 3 4.52 0.00
 5 21 4 3.53 0.00
 5 21 5 0.05 0.00
 5 21 6 2.13 0.00
 5 21 7 -3.61 0.00
 5 21 8 -4.64 0.00
 5 21 9 8.26 0.00
 5 21 10 -4.10 0.00
 5 21 11 1.71 0.00
 5 21 12 4.08 0.00
 5 21 13 4.85 0.00
 5 21 14 -0.17 0.00
 5 21 15 -0.34 0.00
 5 21 16 -0.12 0.00
 5 21 17 -0.09 0.00
 5 23 0 -5.69 0.00
 5 23 1 -1.42 0.00
 5 23 2 0.05 0.00
 5 23 3 -6.18 0.00
 5 23 4 -2.04 0.00
 5 23 5 -2.95 0.00
 5 23 6 3.93 0.00
 5 23 7 0.81 0.00
 5 23 8 -1.61 0.00
 5 23 9 5.67 0.00
 5 23 10 -0.27 0.00
 5 23 11 0.55 0.00
 5 23 12 2.09 0.00
 5 23 13 -1.31 0.00
 5 23 14 -1.44 0.00
 5 23 15 -0.18 0.00
 5 23 16 0.26 0.00
 5 23 17 0.65 0.00
 5 25 0 -0.12 0.00
 5 25 1 5.20 0.00
 5 25 2 -3.34 0.00
 5 25 3 3.75 0.00
 5 25 4 -4.03 0.00
 5 25 5 4.02 0.00
 5 25 6 -3.83 0.00
 5 25 7 0.30 0.00
 5 25 8 0.77 0.00
 5 25 9 2.11 0.00
 5 25 10 6.26 0.00
 5 25 11 -2.87 0.00
 5 25 12 -2.47 0.00
 5 25 13 -2.80 0.00
 5 25 14 2.86 0.00
 5 25 15 2.58 0.00
 5 25 16 2.06 0.00
 5 27 0 0.79 0.00
 5 27 1 -1.35 0.00
 5 27 2 0.30 0.00
 5 27 3 0.61 0.00
 5 27 4 1.34 0.00
 5 27 5 1.64 0.00
 5 27 6 -1.74 0.00
 5 27 7 1.83 0.00
 5 27 8 -3.68 0.00
 5 27 9 0.92 0.00
 5 27 10 6.15 0.00
 5 27 11 0.37 0.00
 5 27 12 -4.12 0.00
 5 27 13 -4.35 0.00
 5 27 14 -1.00 0.00
 5 27 15 0.17 0.00
 5 27 16 -3.74 0.00
 5 29 0 1.18 0.00
 5 29 1 -0.07 0.00
 5 29 2 0.81 0.00
 5 29 3 -5.61 0.00
 5 29 4 2.62 0.00
 5 29 5 -4.44 0.00
 5 29 6 -0.78 0.00
 5 29 7 1.23 0.00
 5 29 8 2.13 0.00
 5 29 9 -0.42 0.00
 5 29 10 -1.57 0.00
 5 29 11 3.15 0.00
 5 29 12 -5.76 0.00
 5 29 13 0.22 0.00
 5 29 14 -0.41 0.00
 5 29 15 0.26 0.00
 5 29 16 0.71 0.00
 5 31 0 4.22 0.00
 5 31 1 -7.76 0.00
 5 31 2 -0.21 0.00
 5 31 3 -0.72 0.00
 5 31 4 5.61 0.00
 5 31 5 -4.94 0.00
 5 31 6 -2.63 0.00
 5 31 7 3.00 0.00
 5 31 8 -3.09 0.00
 5 31 9 0.08 0.00
 5 31 10 -3.35 0.00
 5 31 11 4.52 0.00
 5 31 12 -0.15 0.00
 5 31 13 2.45 0.00
 5 31 14 0.35 0.00
 5 31 15 -4.99 0.00
 5 33 0 2.76 0.00
 5 33 1 -2.92 0.00
 5 33 2 2.93 0.00
 5 33 3 4.87 0.00
 5 33 4 3.18 0.00
 5 33 5 -1.80 0.00
 5 33 6 -3.21 0.00
 5 33 7 2.97 0.00
 5 33 8 0.41 0.00
 5 33 9 1.29 0.00
 5 33 10 -0.33 0.00
 5 33 11 -1.42 0.00
 5 33 12 -0.34 0.00
 5 33 13 -1.03 0.00
 5 33 14 1.22 0.00
 5 35 0 6.23 0.00
 5 35 1 4.19 0.00
 5 35 2 -1.34 0.00
 5 35 3 3.05 0.00
 5 35 4 3.06 0.00
 5 35 5 -4.84 0.00
 5 35 6 1.84 0.00
 5 35 7 -0.05 0.00
 5 35 8 3.41 0.00
 5 35 9 -1.81 0.00
 5 35 10 -0.98 0.00
 5 35 11 -2.41 0.00
 5 35 12 3.29 0.00
 5 35 13 0.19 0.00
 5 35 14 -2.38 0.00
 5 37 0 0.29 0.00
 5 37 1 -0.26 0.00
 5 37 2 1.14 0.00
 5 37 3 2.14 0.00
 5 37 4 0.64 0.00
 5 37 5 -1.64 0.00
 5 37 6 -0.51 0.00
 5 37 7 -0.83 0.00
 5 37 8 1.26 0.00
 5 37 9 0.39 0.00
 5 37 10 -0.29 0.00
 5 37 11 -2.05 0.00
 5 37 12 -4.45 0.00
 5 37 13 1.80 0.00
 5 39 0 2.16 0.00
 5 39 1 0.18 0.00
 5 39 2 6.41 0.00
 5 39 3 1.86 0.00
 5 39 4 0.91 0.00
 5 39 5 1.71 0.00
 5 39 6 -0.63 0.00
 5 39 7 -0.14 0.00
 5 39 8 3.55 0.00
 5 39 9 -0.53 0.00
 5 39 10 -0.75 0.00
 5 39 11 -2.57 0.00
 5 39 12 6.27 0.00
 5 41 0 0.04 0.00
 5 41 1 0.07 0.00
 5 41 2 3.38 0.00
 5 41 3 0.36 0.00
 5 41 4 -2.01 0.00
 5 41 5 1.08 0.00
 5 41 6 0.29 0.00
 5 41 7 -3.03 0.00
 5 41 8 0.37 0.00
 5 41 9 -1.73 0.00
 5 41 10 0.52 0.00
 5 43 0 -0.82 0.00
 5 43 1 2.00 0.00
 5 43 2 3.03 0.00
 5 43 3 -0.90 0.00
 5 43 4 -2.01 0.00
 5 43 5 2.58 0.00
 5 43 6 1.51 0.00
 5 43 7 -3.98 0.00
 5 43 8 -1.08 0.00
 5 43 9 -2.24 0.00
 5 45 0 -1.90 0.00
 5 45 1 0.88 0.00
 5 45 2 1.29 0.00
 5 45 3 -1.18 0.00
 5 45 4 -2.84 0.00
 5 45 5 1.14 0.00
 5 45 6 -1.77 0.00
 5 45 7 0.79 0.00
 5 47 0 1.05 0.00
 5 47 1 0.03 0.00
 5 47 2 1.16 0.00
 5 47 3 0.29 0.00
 5 47 4 0.38 0.00
 6 0 0 99.57 0.00
 6 0 1 33.07 0.00
 6 0 2 -55.35 0.00
 6 0 3 0.04 0.00
 6 0 4 7.38 0.00
 6 0 5 2.72 0.00
 6 0 6 -0.36 0.00
 6 0 7 1.76 0.00
 6 0 8 8.70 0.00
 6 0 9 6.06 0.00
 6 0 10 -7.67 0.00
 6 0 11 -2.25 0.00
 6 0 12 -5.54 0.00
 6 0 13 0.96 0.00
 6 0 14 -3.22 0.00
 6 0 15 -1.77 0.00
 6 0 16 9.55 0.00
 6 0 17 3.34 0.00
 6 0 18 -6.56 0.00
 6 0 19 0.13 0.00
 6 2 0 -61.06 0.00
 6 2 1 15.95 0.00
 6 2 2 -47.42 0.00
 6 2 3 -1.46 0.00
 6 2 4 5.25 0.00
 6 2 5 -11.00 0.00
 6 2 6 -3.06 0.00
 6 2 7 1.30 0.00
 6 2 8 -2.39 0.00
 6 2 9 -0.51 0.00
 6 2 10 5.60 0.00
 6 2 11 -4.92 0.00
 6 2 12 -6.49 0.00
 6 2 13 0.76 0.00
 6 2 14 -2.42 0.00
 6 2 15 -1.45 0.00
 6 2 16 7.80 0.00
 6 2 17 1.28 0.00
 6 2 18 -3.20 0.00
 6 2 19 -0.97 0.00
 6 4 0 7.28 0.00
 6 4 1 16.06 0.00
 6 4 2 -3.82 0.00
 6 4 3 14.71 0.00
 6 4 4 -0.51 0.00
 6 4 5 6.70 0.00
 6 4 6 -10.70 0.00
 6 4 7 -1.35 0.00
 6 4 8 -3.83 0.00
 6 4 9 1.97 0.00
 6 4 10 -3.61 0.00
 6 4 11 0.58 0.00
 6 4 12 0.69 0.00
 6 4 13 2.03 0.00
 6 4 14 -2.31 0.00
 6 4 15 -0.58 0.00
 6 4 16 5.28 0.00
 6 4 17 -0.71 0.00
 6 4 18 -0.61 0.00
 6 4 19 0.11 0.00
 6 6 0 4.77 0.00
 6 6 1 9.22 0.00
 6 6 2 51.35 0.00
 6 6 3 2.17 0.00
 6 6 4 -6.30 0.00
 6 6 5 -1.12 0.00
 6 6 6 3.68 0.00
 6 6 7 -14.69 0.00
 6 6 8 -7.55 0.00
 6 6 9 0.87 0.00
 6 6 10 7.96 0.00
 6 6 11 1.89 0.00
 6 6 12 0.81 0.00
 6 6 13 -3.96 0.00
 6 6 14 0.19 0.00
 6 6 15 0.92 0.00
 6 6 16 -2.12 0.00
 6 6 17 -1.70 0.00
 6 6 18 2.27 0.00
 6 6 19 -1.48 0.00
 6 8 0 27.15 0.00
 6 8 1 -8.23 0.00
 6 8 2 50.83 0.00
 6 8 3 12.43 0.00
 6 8 4 -6.77 0.00
 6 8 5 19.47 0.00
 6 8 6 -1.18 0.00
 6 8 7 -7.24 0.00
 6 8 8 -3.02 0.00
 6 8 9 -1.01 0.00
 6 8 10 -0.93 0.00
 6 8 11 -0.48 0.00
 6 8 12 4.35 0.00
 6 8 13 -3.03 0.00
 6 8 14 5.33 0.00
 6 8 15 3.72 0.00
 6 8 16 -2.07 0.00
 6 8 17 -2.14 0.00
 6 8 18 -0.91 0.00
 6 8 19 0.39 0.00
 6 10 0 3.15 0.00
 6 10 1 -2.03 0.00
 6 10 2 20.54 0.00
 6 10 3 -8.29 0.00
 6 10 4 -14.39 0.00
 6 10 5 0.27 0.00
 6 10 6 1.57 0.00
 6 10 7 3.49 0.00
 6 10 8 -2.28 0.00
 6 10 9 0.10 0.00
 6 10 10 0.09 0.00
 6 10 11 -3.26 0.00
 6 10 12 0.00 0.00
 6 10 13 -10.22 0.00
 6 10 14 3.86 0.00
 6 10 15 -0.42 0.00
 6 10 16 -2.97 0.00
 6 10 17 1.62 0.00
 6 10 18 1.34 0.00
 6 10 19 -0.92 0.00
 6 12 0 -23.07 0.00
 6 12 1 -16.85 0.00
 6 12 2 10.01 0.00
 6 12 3 -7.63 0.00
 6 12 4 -3.93 0.00
 6 12 5 1.94 0.00
 6 12 6 -3.12 0.00
 6 12 7 11.30 0.00
 6 12 8 5.41 0.00
 6 12 9 -0.99 0.00
 6 12 10 2.91 0.00
 6 12 11 4.98 0.00
 6 12 12 -6.79 0.00
 6 12 13 -1.15 0.00
 6 12 14 1.49 0.00
 6 12 15 -0.02 0.00
 6 12 16 -1.96 0.00
 6 12 17 -0.22 0.00
 6 12 18 1.02 0.00
 6 12 19 3.47 0.00
 6 14 0 -2.11 0.00
 6 14 1 -13.03 0.00
 6 14 2 -3.43 0.00
 6 14 3 -8.25 0.00
 6 14 4 0.83 0.00
 6 14 5 6.96 0.00
 6 14 6 -3.90 0.00
 6 14 7 6.49 0.00
 6 14 8 5.09 0.00
 6 14 9 -5.41 0.00
 6 14 10 -1.39 0.00
 6 14 11 5.17 0.00
 6 14 12 -1.26 0.00
 6 14 13 0.24 0.00
 6 14 14 5.49 0.00
 6 14 15 -0.99 0.00
 6 14 16 0.89 0.00
 6 14 17 -2.93 0.00
 6 14 18 1.28 0.00
 6 14 19 0.12 0.00
 6 16 0 -8.05 0.00
 6 16 1 1.39 0.00
 6 16 2 -7.99 0.00
 6 16 3 1.30 0.00
 6 16 4 2.41 0.00
 6 16 5 1.49 0.00
 6 16 6 -2.59 0.00
 6 16 7 -2.32 0.00
 6 16 8 2.94 0.00
 6 16 9 -5.33 0.00
 6 16 10 0.81 0.00
 6 16 11 3.84 0.00
 6 16 12 2.74 0.00
 6 16 13 1.33 0.00
 6 16 14 2.01 0.00
 6 16 15 -3.12 0.00
 6 16 16 2.46 0.00
 6 16 17 -1.01 0.00
 6 16 18 -0.40 0.00
 6 18 0 8.76 0.00
 6 18 1 6.74 0.00
 6 18 2 -9.74 0.00
 6 18 3 -2.67 0.00
 6 18 4 2.14 0.00
 6 18 5 -3.39 0.00
 6 18 6 3.42 0.00
 6 18 7 -1.93 0.00
 6 18 8 9.49 0.00
 6 18 9 -7.95 0.00
 6 18 10 -4.86 0.00
 6 18 11 -6.09 0.00
 6 18 12 2.00 0.00
 6 18 13 -0.50 0.00
 6 18 14 -1.99 0.00
 6 18 15 -2.07 0.00
 6 18 16 -1.20 0.00
 6 18 17 -0.77 0.00
 6 18 18 0.25 0.00
 6 20 0 3.43 0.00
 6 20 1 5.53 0.00
 6 20 2 0.91 0.00
 6 20 3 -0.36 0.00
 6 20 4 7.08 0.00
 6 20 5 5.23 0.00
 6 20 6 -0.45 0.00
 6 20 7 0.20 0.00
 6 20 8 -5.16 0.00
 6 20 9 -3.35 0.00
 6 20 10 1.49 0.00
 6 20 11 -1.14 0.00
 6 20 12 -0.67 0.00
 6 20 13 3.26 0.00
 6 20 14 0.78 0.00
 6 20 15 -1.83 0.00
 6 20 16 -2.32 0.00
 6 20 17 2.10 0.00
 6 20 18 -2.46 0.00
 6 22 0 5.02 0.00
 6 22 1 -3.65 0.00
 6 22 2 7.39 0.00
 6 22 3 -2.21 0.00
 6 22 4 2.21 0.00
 6 22 5 -3.56 0.00
 6 22 6 -5.53 0.00
 6 22 7 -5.08 0.00
 6 22 8 -4.03 0.00
 6 22 9 0.80 0.00
 6 22 10 1.23 0.00
 6 22 11 -0.97 0.00
 6 22 12 -3.36 0.00
 6 22 13 1.64 0.00
 6 22 14 2.56 0.00
 6 22 15 -1.28 0.00
 6 22 16 0.72 0.00
 6 22 17 3.81 0.00
 6 24 0 -12.35 0.00
 6 24 1 0.46 0.00
 6 24 2 -3.53 0.00
 6 24 3 -3.13 0.00
 6 24 4 -3.75 0.00
 6 24 5 3.07 0.00
 6 24 6 4.24 0.00
 6 24 7 -4.69 0.00
 6 24 8 -1.50 0.00
 6 24 9 2.43 0.00
 6 24 10 4.55 0.00
 6 24 11 0.22 0.00
 6 24 12 -5.24 0.00
 6 24 13 -2.61 0.00
 6 24 14 0.64 0.00
 6 24 15 1.03 0.00
 6 24 16 -0.45 0.00
 6 26 0 -5.31 0.00
 6 26 1 0.91 0.00
 6 26 2 2.78 0.00
 6 26 3 1.50 0.00
 6 26 4 -0.05 0.00
 6 26 5 3.23 0.00
 6 26 6 -1.35 0.00
 6 26 7 -0.04 0.00
 6 26 8 -3.34 0.00
 6 26 9 8.28 0.00
 6 26 10 5.59 0.00
 6 26 11 1.24 0.00
 6 26 12 -5.77 0.00
 6 26 13 -3.88 0.00
 6 26 14 -4.70 0.00
 6 26 15 3.30 0.00
 6 26 16 -1.81 0.00
 6 28 0 2.31 0.00
 6 28 1 4.99 0.00
 6 28 2 -1.69 0.00
 6 28 3 -0.05 0.00
 6 28 4 -5.63 0.00
 6 28 5 0.73 0.00
 6 28 6 1.13 0.00
 6 28 7 0.25 0.00
 6 28 8 -5.15 0.00
 6 28 9 5.87 0.00
 6 28 10 0.63 0.00
 6 28 11 2.28 0.00
 6 28 12 -2.65 0.00
 6 28 13 -3.86 0.00
 6 28 14 -0.36 0.00
 6 28 15 0.70 0.00
 6 28 16 -0.93 0.00
 6 30 0 -3.37 0.00
 6 30 1 -2.30 0.00
 6 30 2 -2.34 0.00
 6 30 3 2.01 0.00
 6 30 4 -5.26 0.00
 6 30 5 -0.04 0.00
 6 30 6 -2.57 0.00
 6 30 7 -2.98 0.00
 6 30 8 -1.60 0.00
 6 30 9 -4.34 0.00
 6 30 10 -2.23 0.00
 6 30 11 1.21 0.00
 6 30 12 0.78 0.00
 6 30 13 -0.31 0.00
 6 30 14 0.15 0.00
 6 30 15 0.61 0.00
 6 32 0 5.82 0.00
 6 32 1 -0.24 0.00
 6 32 2 5.94 0.00
 6 32 3 3.65 0.00
 6 32 4 5.00 0.00
 6 32 5 -3.14 0.00
 6 32 6 -1.92 0.00
 6 32 7 -2.04 0.00
 6 32 8 -1.25 0.00
 6 32 9 -1.98 0.00
 6 32 10 -1.39 0.00
 6 32 11 1.74 0.00
 6 32 12 0.02 0.00
 6 32 13 1.66 0.00
 6 32 14 0.83 0.00
 6 34 0 6.58 0.00
 6 34 1 -6.61 0.00
 6 34 2 10.84 0.00
 6 34 3 -2.00 0.00
 6 34 4 7.98 0.00
 6 34 5 -0.62 0.00
 6 34 6 0.01 0.00
 6 34 7 -1.34 0.00
 6 34 8 1.79 0.00
 6 34 9 -3.15 0.00
 6 34 10 -1.17 0.00
 6 34 11 -1.89 0.00
 6 34 12 1.82 0.00
 6 34 13 -0.12 0.00
 6 34 14 0.26 0.00
 6 36 0 0.65 0.00
 6 36 1 -1.73 0.00
 6 36 2 -2.03 0.00
 6 36 3 0.54 0.00
 6 36 4 1.68 0.00
 6 36 5 -0.44 0.00
 6 36 6 3.89 0.00
 6 36 7 -1.04 0.00
 6 36 8 4.72 0.00
 6 36 9 0.63 0.00
 6 36 10 -0.83 0.00
 6 36 11 -1.27 0.00
 6 36 12 -4.00 0.00
 6 36 13 -0.62 0.00
 6 38 0 -5.59 0.00
 6 38 1 -1.12 0.00
 6 38 2 -3.12 0.00
 6 38 3 1.35 0.00
 6 38 4 -0.65 0.00
 6 38 5 -1.08 0.00
 6 38 6 0.68 0.00
 6 38 7 0.11 0.00
 6 38 8 4.69 0.00
 6 38 9 0.31 0.00
 6 38 10 2.52 0.00
 6 38 11 -1.75 0.00
 6 38 12 1.54 0.00
 6 40 0 -2.37 0.00
 6 40 1 2.45 0.00
 6 40 2 -0.36 0.00
 6 40 3 2.27 0.00
 6 40 4 1.30 0.00
 6 40 5 -1.06 0.00
 6 40 6 1.38 0.00
 6 40 7 -0.41 0.00
 6 40 8 -1.06 0.00
 6 40 9 1.45 0.00
 6 40 10 -0.20 0.00
 6 40 11 1.86 0.00
 6 42 0 0.06 0.00
 6 42 1 4.88 0.00
 6 42 2 -0.73 0.00
 6 42 3 2.52 0.00
 6 42 4 -1.69 0.00
 6 42 5 2.56 0.00
 6 42 6 -1.88 0.00
 6 42 7 0.92 0.00
 6 42 8 -7.19 0.00
 6 42 9 -1.84 0.00
 6 44 0 -2.96 0.00
 6 44 1 2.50 0.00
 6 44 2 -1.46 0.00
 6 44 3 -0.07 0.00
 6 44 4 -4.76 0.00
 6 44 5 1.00 0.00
 6 44 6 -2.10 0.00
 6 44 7 -0.09 0.00
 6 46 0 -3.21 0.00
 6 46 1 2.82 0.00
 6 46 2 0.40 0.00
 6 46 3 -0.17 0.00
 6 46 4 0.66 0.00
 6 46 5 0.65 0.00
 7 1 0 1.91 0.00
 7 1 1 -13.68 0.00
 7 1 2 -11.01 0.00
 7 1 3 14.30 0.00
 7 1 4 -8.55 0.00
 7 1 5 16.66 0.00
 7 1 6 -12.85 0.00
 7 1 7 -12.25 0.00
 7 1 8 8.25 0.00
 7 1 9 5.51 0.00
 7 1 10 -6.35 0.00
 7 1 11 2.39 0.00
 7 1 12 0.54 0.00
 7 1 13 -1.36 0.00
 7 1 14 -1.19 0.00
 7 1 15 -0.54 0.00
 7 1 16 2.54 0.00
 7 1 17 -1.75 0.00
 7 1 18 1.04 0.00
 7 1 19 -5.61 0.00
 7 3 0 -12.33 0.00
 7 3 1 -37.18 0.00
 7 3 2 2.47 0.00
 7 3 3 18.94 0.00
 7 3 4 -3.58 0.00
 7 3 5 20.37 0.00
 7 3 6 0.32 0.00
 7 3 7 0.27 0.00
 7 3 8 6.28 0.00
 7 3 9 -0.72 0.00
 7 3 10 -2.25 0.00
 7 3 11 -5.61 0.00
 7 3 12 2.72 0.00
 7 3 13 -7.89 0.00
 7 3 14 2.86 0.00
 7 3 15 -1.26 0.00
 7 3 16 -1.16 0.00
 7 3 17 1.87 0.00
 7 3 18 0.12 0.00
 7 3 19 -2.12 0.00
 7 5 0 -11.64 0.00
 7 5 1 -43.81 0.00
 7 5 2 21.58 0.00
 7 5 3 -0.51 0.00
 7 5 4 -9.46 0.00
 7 5 5 2.84 0.00
 7 5 6 0.02 0.00
 7 5 7 -1.36 0.00
 7 5 8 1.39 0.00
 7 5 9 3.27 0.00
 7 5 10 5.06 0.00
 7 5 11 1.15 0.00
 7 5 12 3.83 0.00
 7 5 13 -5.12 0.00
 7 5 14 3.35 0.00
 7 5 15 -0.39 0.00
 7 5 16 -5.99 0.00
 7 5 17 2.31 0.00
 7 5 18 2.11 0.00
 7 5 19 -0.41 0.00
 7 7 0 -4.78 0.00
 7 7 1 -16.62 0.00
 7 7 2 20.11 0.00
 7 7 3 3.23 0.00
 7 7 4 4.75 0.00
 7 7 5 11.06 0.00
 7 7 6 4.67 0.00
 7 7 7 9.13 0.00
 7 7 8 -6.12 0.00
 7 7 9 2.99 0.00
 7 7 10 3.33 0.00
 7 7 11 1.57 0.00
 7 7 12 -4.79 0.00
 7 7 13 -0.17 0.00
 7 7 14 1.58 0.00
 7 7 15 3.59 0.00
 7 7 16 -5.71 0.00
 7 7 17 -1.04 0.00
 7 7 18 2.92 0.00
 7 7 19 -0.06 0.00
 7 9 0 -6.42 0.00
 7 9 1 1.35 0.00
 7 9 2 25.59 0.00
 7 9 3 -1.82 0.00
 7 9 4 -1.15 0.00
 7 9 5 -5.75 0.00
 7 9 6 3.58 0.00
 7 9 7 -0.29 0.00
 7 9 8 2.22 0.00
 7 9 9 3.43 0.00
 7 9 10 -1.50 0.00
 7 9 11 6.11 0.00
 7 9 12 -1.44 0.00
 7 9 13 8.27 0.00
 7 9 14 -0.23 0.00
 7 9 15 5.37 0.00
 7 9 16 -5.39 0.00
 7 9 17 -1.49 0.00
 7 9 18 2.83 0.00
 7 9 19 -0.80 0.00
 7 11 0 22.29 0.00
 7 11 1 7.78 0.00
 7 11 2 11.14 0.00
 7 11 3 2.74 0.00
 7 11 4 1.58 0.00
 7 11 5 -9.05 0.00
 7 11 6 11.35 0.00
 7 11 7 2.91 0.00
 7 11 8 2.37 0.00
 7 11 9 4.85 0.00
 7 11 10 -4.62 0.00
 7 11 11 1.80 0.00
 7 11 12 -4.75 0.00
 7 11 13 1.93 0.00
 7 11 14 -5.02 0.00
 7 11 15 2.23 0.00
 7 11 16 -4.37 0.00
 7 11 17 1.15 0.00
 7 11 18 3.67 0.00
 7 11 19 1.47 0.00
 7 13 0 -2.28 0.00
 7 13 1 6.62 0.00
 7 13 2 -0.62 0.00
 7 13 3 4.34 0.00
 7 13 4 -1.75 0.00
 7 13 5 -11.18 0.00
 7 13 6 8.97 0.00
 7 13 7 -2.62 0.00
 7 13 8 -2.77 0.00
 7 13 9 5.01 0.00
 7 13 10 -2.91 0.00
 7 13 11 -3.81 0.00
 7 13 12 0.85 0.00
 7 13 13 1.09 0.00
 7 13 14 -2.57 0.00
 7 13 15 -1.53 0.00
 7 13 16 -3.08 0.00
 7 13 17 0.21 0.00
 7 13 18 1.79 0.00
 7 13 19 4.69 0.00
 7 15 0 1.15 0.00
 7 15 1 7.62 0.00
 7 15 2 -14.59 0.00
 7 15 3 3.60 0.00
 7 15 4 0.81 0.00
 7 15 5 -2.51 0.00
 7 15 6 -10.51 0.00
 7 15 7 4.66 0.00
 7 15 8 -12.99 0.00
 7 15 9 2.46 0.00
 7 15 10 -0.48 0.00
 7 15 11 -3.57 0.00
 7 15 12 4.74 0.00
 7 15 13 1.37 0.00
 7 15 14 -2.49 0.00
 7 15 15 -3.38 0.00
 7 15 16 2.70 0.00
 7 15 17 -1.49 0.00
 7 15 18 -3.60 0.00
 7 17 0 1.42 0.00
 7 17 1 1.57 0.00
 7 17 2 -13.49 0.00
 7 17 3 -2.60 0.00
 7 17 4 2.39 0.00
 7 17 5 -3.66 0.00
 7 17 6 3.96 0.00
 7 17 7 -0.87 0.00
 7 17 8 3.48 0.00
 7 17 9 0.47 0.00
 7 17 10 2.96 0.00
 7 17 11 -3.80 0.00
 7 17 12 1.47 0.00
 7 17 13 3.70 0.00
 7 17 14 -2.41 0.00
 7 17 15 -2.84 0.00
 7 17 16 3.15 0.00
 7 17 17 1.72 0.00
 7 17 18 -5.09 0.00
 7 19 0 4.46 0.00
 7 19 1 -6.49 0.00
 7 19 2 -5.15 0.00
 7 19 3 -0.91 0.00
 7 19 4 -1.30 0.00
 7 19 5 7.85 0.00
 7 19 6 -0.64 0.00
 7 19 7 0.37 0.00
 7 19 8 6.26 0.00
 7 19 9 -5.74 0.00
 7 19 10 -0.89 0.00
 7 19 11 -2.34 0.00
 7 19 12 0.86 0.00
 7 19 13 -0.30 0.00
 7 19 14 -3.09 0.00
 7 19 15 0.92 0.00
 7 19 16 1.94 0.00
 7 19 17 -3.05 0.00
 7 19 18 -3.95 0.00
 7 21 0 8.20 0.00
 7 21 1 -3.63 0.00
 7 21 2 3.46 0.00
 7 21 3 2.20 0.00
 7 21 4 5.74 0.00
 7 21 5 1.21 0.00
 7 21 6 0.95 0.00
 7 21 7 -8.15 0.00
 7 21 8 -0.38 0.00
 7 21 9 0.70 0.00
 7 21 10 3.30 0.00
 7 21 11 -3.64 0.00
 7 21 12 0.09 0.00
 7 21 13 -0.73 0.00
 7 21 14 1.31 0.00
 7 21 15 0.76 0.00
 7 21 16 -1.18 0.00
 7 21 17 -3.78 0.00
 7 23 0 -3.32 0.00
 7 23 1 -5.63 0.00
 7 23 2 3.85 0.00
 7 23 3 -0.34 0.00
 7 23 4 -2.49 0.00
 7 23 5 1.94 0.00
 7 23 6 3.32 0.00
 7 23 7 -4.66 0.00
 7 23 8 -1.17 0.00
 7 23 9 -0.56 0.00
 7 23 10 0.85 0.00
 7 23 11 0.09 0.00
 7 23 12 -1.40 0.00
 7 23 13 -5.01 0.00
 7 23 14 -0.09 0.00
 7 23 15 1.78 0.00
 7 23 16 2.02 0.00
 7 25 0 -1.13 0.00
 7 25 1 -3.24 0.00
 7 25 2 2.41 0.00
 7 25 3 -0.78 0.00
 7 25 4 -5.57 0.00
 7 25 5 0.92 0.00
 7 25 6 -0.27 0.00
 7 25 7 -7.62 0.00
 7 25 8 -2.15 0.00
 7 25 9 0.61 0.00
 7 25 10 1.03 0.00
 7 25 11 3.71 0.00
 7 25 12 -7.43 0.00
 7 25 13 -1.35 0.00
 7 25 14 -1.05 0.00
 7 25 15 4.44 0.00
 7 25 16 -3.08 0.00
 7 27 0 -1.08 0.00
 7 27 1 -4.70 0.00
 7 27 2 1.64 0.00
 7 27 3 -7.48 0.00
 7 27 4 -4.87 0.00
 7 27 5 -2.72 0.00
 7 27 6 0.01 0.00
 7 27 7 -3.31 0.00
 7 27 8 -5.99 0.00
 7 27 9 2.40 0.00
 7 27 10 3.28 0.00
 7 27 11 7.23 0.00
 7 27 12 -3.29 0.00
 7 27 13 -4.06 0.00
 7 27 14 -0.95 0.00
 7 27 15 0.76 0.00
 7 27 16 -2.41 0.00
 7 29 0 -3.41 0.00
 7 29 1 4.63 0.00
 7 29 2 3.02 0.00
 7 29 3 -7.38 0.00
 7 29 4 -5.01 0.00
 7 29 5 -1.81 0.00
 7 29 6 2.02 0.00
 7 29 7 1.87 0.00
 7 29 8 0.65 0.00
 7 29 9 0.70 0.00
 7 29 10 1.30 0.00
 7 29 11 1.99 0.00
 7 29 12 1.51 0.00
 7 29 13 -4.38 0.00
 7 29 14 0.44 0.00
 7 29 15 2.18 0.00
 7 31 0 -2.57 0.00
 7 31 1 8.72 0.00
 7 31 2 -2.55 0.00
 7 31 3 5.64 0.00
 7 31 4 -1.58 0.00
 7 31 5 1.08 0.00
 7 31 6 -1.69 0.00
 7 31 7 1.03 0.00
 7 31 8 -1.35 0.00
 7 31 9 -3.06 0.00
 7 31 10 0.49 0.00
 7 31 11 1.73 0.00
 7 31 12 5.61 0.00
 7 31 13 1.44 0.00
 7 31 14 -2.17 0.00
 7 31 15 -1.08 0.00
 7 33 0 -7.19 0.00
 7 33 1 7.13 0.00
 7 33 2 -1.98 0.00
 7 33 3 7.15 0.00
 7 33 4 -1.04 0.00
 7 33 5 1.25 0.00
 7 33 6 -4.58 0.00
 7 33 7 -1.95 0.00
 7 33 8 -1.99 0.00
 7 33 9 -4.13 0.00
 7 33 10 1.47 0.00
 7 33 11 -2.06 0.00
 7 33 12 4.50 0.00
 7 33 13 0.00 0.00
 7 33 14 0.98 0.00
 7 35 0 1.72 0.00
 7 35 1 6.27 0.00
 7 35 2 -3.60 0.00
 7 35 3 0.62 0.00
 7 35 4 4.50 0.00
 7 35 5 -0.80 0.00
 7 35 6 2.05 0.00
 7 35 7 -0.46 0.00
 7 35 8 3.41 0.00
 7 35 9 -4.15 0.00
 7 35 10 -1.71 0.00
 7 35 11 -2.38 0.00
 7 35 12 3.84 0.00
 7 35 13 1.69 0.00
 7 37 0 -0.40 0.00
 7 37 1 1.35 0.00
 7 37 2 -2.50 0.00
 7 37 3 0.26 0.00
 7 37 4 1.95 0.00
 7 37 5 0.89 0.00
 7 37 6 -1.75 0.00
 7 37 7 -0.50 0.00
 7 37 8 0.01 0.00
 7 37 9 -0.79 0.00
 7 37 10 -1.54 0.00
 7 37 11 -0.32 0.00
 7 37 12 -3.44 0.00
 7 39 0 3.74 0.00
 7 39 1 -0.17 0.00
 7 39 2 2.30 0.00
 7 39 3 -1.65 0.00
 7 39 4 1.22 0.00
 7 39 5 2.96 0.00
 7 39 6 -3.21 0.00
 7 39 7 3.45 0.00
 7 39 8 1.86 0.00
 7 39 9 1.93 0.00
 7 39 10 1.06 0.00
 7 39 11 -1.60 0.00
 7 41 0 1.46 0.00
 7 41 1 -0.02 0.00
 7 41 2 -0.97 0.00
 7 41 3 -2.42 0.00
 7 41 4 -1.70 0.00
 7 41 5 -1.54 0.00
 7 41 6 -1.23 0.00
 7 41 7 0.19 0.00
 7 41 8 -2.39 0.00
 7 41 9 2.04 0.00
 7 43 0 -0.33 0.00
 7 43 1 0.25 0.00
 7 43 2 -1.31 0.00
 7 43 3 -3.80 0.00
 7 43 4 -0.94 0.00
 7 43 5 -0.38 0.00
 7 43 6 2.79 0.00
 7 43 7 -0.23 0.00
 7 45 0 3.33 0.00
 7 45 1 0.07 0.00
 7 45 2 1.03 0.00
 7 45 3 -1.06 0.00
 7 45 4 -5.09 0.00
 7 45 5 -1.37 0.00
 7 45 6 -0.44 0.00
 7 47 0 2.75 0.00
 7 47 1 1.75 0.00
 7 47 2 0.42 0.00
 8 0 0 55.19 0.00
 8 0 1 8.93 0.00
 8 0 2 5.70 0.00
 8 0 3 -7.75 0.00
 8 0 4 12.15 0.00
 8 0 5 -4.11 0.00
 8 0 6 -11.02 0.00
 8 0 7 0.65 0.00
 8 0 8 3.74 0.00
 8 0 9 2.25 0.00
 8 0 10 10.29 0.00
 8 0 11 -1.23 0.00
 8 0 12 0.08 0.00
 8 0 13 4.48 0.00
 8 0 14 -7.95 0.00
 8 0 15 -1.48 0.00
 8 0 16 -2.13 0.00
 8 0 17 -2.51 0.00
 8 0 18 -6.85 0.00
 8 0 19 3.09 0.00
 8 2 0 9.21 0.00
 8 2 1 -5.11 0.00
 8 2 2 -0.03 0.00
 8 2 3 -8.39 0.00
 8 2 4 12.65 0.00
 8 2 5 -16.59 0.00
 8 2 6 1.62 0.00
 8 2 7 -4.14 0.00
 8 2 8 0.35 0.00
 8 2 9 -2.48 0.00
 8 2 10 21.59 0.00
 8 2 11 -6.04 0.00
 8 2 12 1.18 0.00
 8 2 13 2.41 0.00
 8 2 14 -2.07 0.00
 8 2 15 -0.31 0.00
 8 2 16 -0.61 0.00
 8 2 17 -3.48 0.00
 8 2 18 -2.23 0.00
 8 2 19 4.45 0.00
 8 4 0 -5.32 0.00
 8 4 1 6.48 0.00
 8 4 2 6.51 0.00
 8 4 3 3.33 0.00
 8 4 4 4.50 0.00
 8 4 5 13.80 0.00
 8 4 6 2.81 0.00
 8 4 7 5.14 0.00
 8 4 8 -6.91 0.00
 8 4 9 -2.58 0.00
 8 4 10 -0.08 0.00
 8 4 11 -5.21 0.00
 8 4 12 2.03 0.00
 8 4 13 2.33 0.00
 8 4 14 -0.10 0.00
 8 4 15 -0.06 0.00
 8 4 16 2.51 0.00
 8 4 17 -0.93 0.00
 8 4 18 0.25 0.00
 8 4 19 6.05 0.00
 8 6 0 -14.75 0.00
 8 6 1 -13.02 0.00
 8 6 2 -1.92 0.00
 8 6 3 -12.55 0.00
 8 6 4 -4.35 0.00
 8 6 5 -3.01 0.00
 8 6 6 12.89 0.00
 8 6 7 -6.99 0.00
 8 6 8 -11.27 0.00
 8 6 9 5.78 0.00
 8 6 10 2.79 0.00
 8 6 11 1.02 0.00
 8 6 12 -5.27 0.00
 8 6 13 -0.20 0.00
 8 6 14 -0.35 0.00
 8 6 15 -0.62 0.00
 8 6 16 -0.31 0.00
 8 6 17 -1.14 0.00
 8 6 18 5.70 0.00
 8 6 19 4.64 0.00
 8 8 0 -33.71 0.00
 8 8 1 0.13 0.00
 8 8 2 -4.29 0.00
 8 8 3 0.07 0.00
 8 8 4 -5.04 0.00
 8 8 5 6.05 0.00
 8 8 6 10.05 0.00
 8 8 7 -5.30 0.00
 8 8 8 -2.37 0.00
 8 8 9 6.89 0.00
 8 8 10 -2.94 0.00
 8 8 11 5.00 0.00
 8 8 12 1.37 0.00
 8 8 13 3.67 0.00
 8 8 14 3.66 0.00
 8 8 15 0.46 0.00
 8 8 16 0.71 0.00
 8 8 17 -1.79 0.00
 8 8 18 2.73 0.00
 8 8 19 0.39 0.00
 8 10 0 8.06 0.00
 8 10 1 8.08 0.00
 8 10 2 2.45 0.00
 8 10 3 -10.62 0.00
 8 10 4 -1.84 0.00
 8 10 5 -6.09 0.00
 8 10 6 8.70 0.00
 8 10 7 3.63 0.00
 8 10 8 1.33 0.00
 8 10 9 4.08 0.00
 8 10 10 -0.06 0.00
 8 10 11 3.49 0.00
 8 10 12 0.64 0.00
 8 10 13 -0.02 0.00
 8 10 14 1.81 0.00
 8 10 15 -3.48 0.00
 8 10 16 0.31 0.00
 8 10 17 0.23 0.00
 8 10 18 4.95 0.00
 8 10 19 -1.84 0.00
 8 12 0 -9.10 0.00
 8 12 1 15.55 0.00
 8 12 2 2.36 0.00
 8 12 3 3.92 0.00
 8 12 4 -3.71 0.00
 8 12 5 5.90 0.00
 8 12 6 -0.85 0.00
 8 12 7 5.19 0.00
 8 12 8 3.52 0.00
 8 12 9 -1.94 0.00
 8 12 10 0.55 0.00
 8 12 11 3.80 0.00
 8 12 12 -5.76 0.00
 8 12 13 -0.62 0.00
 8 12 14 -2.92 0.00
 8 12 15 -3.39 0.00
 8 12 16 -2.30 0.00
 8 12 17 4.49 0.00
 8 12 18 2.34 0.00
 8 14 0 9.97 0.00
 8 14 1 4.83 0.00
 8 14 2 -8.33 0.00
 8 14 3 4.14 0.00
 8 14 4 -8.38 0.00
 8 14 5 3.21 0.00
 8 14 6 -10.67 0.00
 8 14 7 -5.32 0.00
 8 14 8 1.88 0.00
 8 14 9 -7.60 0.00
 8 14 10 -0.61 0.00
 8 14 11 -0.12 0.00
 8 14 12 2.99 0.00
 8 14 13 -4.89 0.00
 8 14 14 -1.28 0.00
 8 14 15 -2.94 0.00
 8 14 16 -3.71 0.00
 8 14 17 -0.50 0.00
 8 14 18 -2.82 0.00
 8 16 0 5.95 0.00
 8 16 1 7.99 0.00
 8 16 2 -2.76 0.00
 8 16 3 3.23 0.00
 8 16 4 0.31 0.00
 8 16 5 -0.33 0.00
 8 16 6 -3.38 0.00
 8 16 7 -2.84 0.00
 8 16 8 -0.97 0.00
 8 16 9 1.35 0.00
 8 16 10 1.54 0.00
 8 16 11 4.72 0.00
 8 16 12 1.84 0.00
 8 16 13 0.48 0.00
 8 16 14 -2.49 0.00
 8 16 15 -0.27 0.00
 8 16 16 -0.14 0.00
 8 16 17 4.11 0.00
 8 16 18 -3.90 0.00
 8 18 0 8.01 0.00
 8 18 1 -0.30 0.00
 8 18 2 -7.43 0.00
 8 18 3 -1.68 0.00
 8 18 4 0.92 0.00
 8 18 5 -8.09 0.00
 8 18 6 -2.63 0.00
 8 18 7 -0.91 0.00
 8 18 8 -0.69 0.00
 8 18 9 1.10 0.00
 8 18 10 -7.53 0.00
 8 18 11 -0.61 0.00
 8 18 12 0.66 0.00
 8 18 13 0.99 0.00
 8 18 14 -2.43 0.00
 8 18 15 1.92 0.00
 8 18 16 0.55 0.00
 8 18 17 1.99 0.00
 8 20 0 -2.20 0.00
 8 20 1 -3.29 0.00
 8 20 2 -2.94 0.00
 8 20 3 -1.00 0.00
 8 20 4 1.06 0.00
 8 20 5 1.21 0.00
 8 20 6 -5.61 0.00
 8 20 7 5.41 0.00
 8 20 8 -8.69 0.00
 8 20 9 2.15 0.00
 8 20 10 2.73 0.00
 8 20 11 -0.69 0.00
 8 20 12 -1.19 0.00
 8 20 13 1.03 0.00
 8 20 14 1.80 0.00
 8 20 15 -2.30 0.00
 8 20 16 -1.64 0.00
 8 20 17 2.39 0.00
 8 22 0 0.20 0.00
 8 22 1 2.23 0.00
 8 22 2 1.50 0.00
 8 22 3 3.65 0.00
 8 22 4 1.40 0.00
 8 22 5 -2.88 0.00
 8 22 6 -1.67 0.00
 8 22 7 3.10 0.00
 8 22 8 3.08 0.00
 8 22 9 0.41 0.00
 8 22 10 5.42 0.00
 8 22 11 -2.96 0.00
 8 22 12 -1.41 0.00
 8 22 13 -0.78 0.00
 8 22 14 2.56 0.00
 8 22 15 -6.44 0.00
 8 22 16 -3.39 0.00
 8 24 0 -5.80 0.00
 8 24 1 0.70 0.00
 8 24 2 2.63 0.00
 8 24 3 -2.37 0.00
 8 24 4 5.44 0.00
 8 24 5 -1.50 0.00
 8 24 6 6.64 0.00
 8 24 7 -0.93 0.00
 8 24 8 -2.10 0.00
 8 24 9 -4.03 0.00
 8 24 10 3.47 0.00
 8 24 11 0.10 0.00
 8 24 12 -1.70 0.00
 8 24 13 -0.61 0.00
 8 24 14 3.16 0.00
 8 24 15 -1.93 0.00
 8 24 16 -0.91 0.00
 8 26 0 -2.10 0.00
 8 26 1 -0.26 0.00
 8 26 2 2.69 0.00
 8 26 3 -1.53 0.00
 8 26 4 -1.17 0.00
 8 26 5 -3.37 0.00
 8 26 6 -5.08 0.00
 8 26 7 -2.31 0.00
 8 26 8 -5.02 0.00
 8 26 9 -3.30 0.00
 8 26 10 4.17 0.00
 8 26 11 1.87 0.00
 8 26 12 -1.60 0.00
 8 26 13 0.90 0.00
 8 26 14 1.05 0.00
 8 26 15 1.21 0.00
 8 28 0 1.31 0.00
 8 28 1 0.51 0.00
 8 28 2 -4.21 0.00
 8 28 3 -5.76 0.00
 8 28 4 -6.72 0.00
 8 28 5 -2.33 0.00
 8 28 6 -0.43 0.00
 8 28 7 2.04 0.00
 8 28 8 -0.11 0.00
 8 28 9 -1.95 0.00
 8 28 10 5.68 0.00
 8 28 11 0.74 0.00
 8 28 12 2.79 0.00
 8 28 13 -4.55 0.00
 8 28 14 1.51 0.00
 8 28 15 -1.11 0.00
 8 30 0 1.51 0.00
 8 30 1 0.16 0.00
 8 30 2 -0.35 0.00
 8 30 3 0.13 0.00
 8 30 4 -3.60 0.00
 8 30 5 0.07 0.00
 8 30 6 1.41 0.00
 8 30 7 1.63 0.00
 8 30 8 7.31 0.00
 8 30 9 -4.42 0.00
 8 30 10 1.48 0.00
 8 30 11 1.67 0.00
 8 30 12 1.36 0.00
 8 30 13 0.61 0.00
 8 30 14 -1.67 0.00
 8 30 15 6.07 0.00
 8 32 0 2.69 0.00
 8 32 1 0.15 0.00
 8 32 2 -2.41 0.00
 8 32 3 0.35 0.00
 8 32 4 0.91 0.00
 8 32 5 -1.66 0.00
 8 32 6 -2.47 0.00
 8 32 7 1.65 0.00
 8 32 8 3.15 0.00
 8 32 9 2.22 0.00
 8 32 10 -1.26 0.00
 8 32 11 6.44 0.00
 8 32 12 0.66 0.00
 8 32 13 2.84 0.00
 8 32 14 -1.90 0.00
 8 34 0 5.06 0.00
 8 34 1 -3.37 0.00
 8 34 2 -0.33 0.00
 8 34 3 -1.84 0.00
 8 34 4 -1.37 0.00
 8 34 5 2.23 0.00
 8 34 6 -6.49 0.00
 8 34 7 3.18 0.00
 8 34 8 -0.48 0.00
 8 34 9 -0.36 0.00
 8 34 10 -3.09 0.00
 8 34 11 -0.71 0.00
 8 34 12 5.89 0.00
 8 34 13 -1.52 0.00
 8 36 0 6.67 0.00
 8 36 1 1.25 0.00
 8 36 2 -4.45 0.00
 8 36 3 1.69 0.00
 8 36 4 0.49 0.00
 8 36 5 2.38 0.00
 8 36 6 -1.78 0.00
 8 36 7 -0.12 0.00
 8 36 8 -2.06 0.00
 8 36 9 0.77 0.00
 8 36 10 -6.10 0.00
 8 36 11 -0.19 0.00
 8 36 12 -0.80 0.00
 8 38 0 11.89 0.00
 8 38 1 1.99 0.00
 8 38 2 3.17 0.00
 8 38 3 0.88 0.00
 8 38 4 3.03 0.00
 8 38 5 -1.30 0.00
 8 38 6 -2.79 0.00
 8 38 7 0.38 0.00
 8 38 8 -1.85 0.00
 8 38 9 -0.66 0.00
 8 38 10 -0.92 0.00
 8 38 11 -0.02 0.00
 8 40 0 5.23 0.00
 8 40 1 -1.00 0.00
 8 40 2 3.20 0.00
 8 40 3 -0.72 0.00
 8 40 4 2.77 0.00
 8 40 5 -3.18 0.00
 8 40 6 -0.02 0.00
 8 40 7 -3.09 0.00
 8 40 8 2.12 0.00
 8 40 9 -2.24 0.00
 8 42 0 2.51 0.00
 8 42 1 0.83 0.00
 8 42 2 -1.46 0.00
 8 42 3 -2.18 0.00
 8 42 4 0.10 0.00
 8 42 5 -1.09 0.00
 8 42 6 4.31 0.00
 8 42 7 -0.29 0.00
 8 44 0 0.99 0.00
 8 44 1 0.29 0.00
 8 44 2 3.07 0.00
 8 44 3 -3.28 0.00
 8 44 4 -2.61 0.00
 8 44 5 -1.78 0.00
 8 44 6 2.60 0.00
 8 46 0 -0.10 0.00
 8 46 1 -2.76 0.00
 8 46 2 1.04 0.00
 8 46 3 -7.55 0.00
 9 1 0 18.42 0.00
 9 1 1 34.65 0.00
 9 1 2 -9.54 0.00
 9 1 3 -18.01 0.00
 9 1 4 -2.36 0.00
 9 1 5 -8.50 0.00
 9 1 6 1.93 0.00
 9 1 7 4.78 0.00
 9 1 8 0.31 0.00
 9 1 9 6.58 0.00
 9 1 10 1.77 0.00
 9 1 11 5.09 0.00
 9 1 12 -0.15 0.00
 9 1 13 -0.87 0.00
 9 1 14 -1.79 0.00
 9 1 15 -1.29 0.00
 9 1 16 -1.16 0.00
 9 1 17 2.57 0.00
 9 1 18 -0.59 0.00
 9 3 0 19.57 0.00
 9 3 1 32.02 0.00
 9 3 2 2.43 0.00
 9 3 3 -10.61 0.00
 9 3 4 6.05 0.00
 9 3 5 -7.21 0.00
 9 3 6 9.62 0.00
 9 3 7 -2.59 0.00
 9 3 8 -7.23 0.00
 9 3 9 -2.79 0.00
 9 3 10 -3.02 0.00
 9 3 11 6.11 0.00
 9 3 12 0.96 0.00
 9 3 13 -0.28 0.00
 9 3 14 1.49 0.00
 9 3 15 0.11 0.00
 9 3 16 -2.95 0.00
 9 3 17 -0.39 0.00
 9 3 18 -0.13 0.00
 9 5 0 6.00 0.00
 9 5 1 20.47 0.00
 9 5 2 6.97 0.00
 9 5 3 -13.66 0.00
 9 5 4 -3.80 0.00
 9 5 5 -5.60 0.00
 9 5 6 2.22 0.00
 9 5 7 -3.34 0.00
 9 5 8 -9.72 0.00
 9 5 9 -2.55 0.00
 9 5 10 -0.01 0.00
 9 5 11 14.97 0.00
 9 5 12 -0.49 0.00
 9 5 13 4.43 0.00
 9 5 14 2.88 0.00
 9 5 15 1.39 0.00
 9 5 16 -2.34 0.00
 9 5 17 2.56 0.00
 9 5 18 2.76 0.00
 9 7 0 -6.08 0.00
 9 7 1 24.53 0.00
 9 7 2 -4.90 0.00
 9 7 3 0.25 0.00
 9 7 4 -6.35 0.00
 9 7 5 3.47 0.00
 9 7 6 -4.17 0.00
 9 7 7 -6.88 0.00
 9 7 8 -8.66 0.00
 9 7 9 -6.57 0.00
 9 7 10 0.57 0.00
 9 7 11 5.14 0.00
 9 7 12 -1.35 0.00
 9 7 13 -4.93 0.00
 9 7 14 3.69 0.00
 9 7 15 0.60 0.00
 9 7 16 1.40 0.00
 9 7 17 -0.35 0.00
 9 7 18 6.27 0.00
 9 9 0 -13.40 0.00
 9 9 1 6.59 0.00
 9 9 2 -0.02 0.00
 9 9 3 -2.45 0.00
 9 9 4 -10.39 0.00
 9 9 5 -0.18 0.00
 9 9 6 2.79 0.00
 9 9 7 -3.24 0.00
 9 9 8 5.11 0.00
 9 9 9 -7.89 0.00
 9 9 10 3.85 0.00
 9 9 11 -0.09 0.00
 9 9 12 6.62 0.00
 9 9 13 -5.92 0.00
 9 9 14 3.68 0.00
 9 9 15 -0.46 0.00
 9 9 16 1.19 0.00
 9 9 17 0.85 0.00
 9 9 18 4.41 0.00
 9 11 0 -3.00 0.00
 9 11 1 -2.57 0.00
 9 11 2 -3.95 0.00
 9 11 3 -0.34 0.00
 9 11 4 -6.58 0.00
 9 11 5 3.06 0.00
 9 11 6 6.20 0.00
 9 11 7 2.98 0.00
 9 11 8 4.80 0.00
 9 11 9 -4.22 0.00
 9 11 10 1.04 0.00
 9 11 11 -4.17 0.00
 9 11 12 2.13 0.00
 9 11 13 -7.29 0.00
 9 11 14 -2.10 0.00
 9 11 15 -0.68 0.00
 9 11 16 1.38 0.00
 9 11 17 3.62 0.00
 9 11 18 5.65 0.00
 9 13 0 -15.51 0.00
 9 13 1 -9.24 0.00
 9 13 2 -6.80 0.00
 9 13 3 1.97 0.00
 9 13 4 -0.24 0.00
 9 13 5 -1.28 0.00
 9 13 6 8.08 0.00
 9 13 7 -0.83 0.00
 9 13 8 0.12 0.00
 9 13 9 -0.49 0.00
 9 13 10 3.13 0.00
 9 13 11 -4.28 0.00
 9 13 12 2.40 0.00
 9 13 13 -3.29 0.00
 9 13 14 -6.07 0.00
 9 13 15 -1.29 0.00
 9 13 16 -0.05 0.00
 9 13 17 3.30 0.00
 9 13 18 3.16 0.00
 9 15 0 5.27 0.00
 9 15 1 -6.75 0.00
 9 15 2 4.54 0.00
 9 15 3 -0.01 0.00
 9 15 4 1.64 0.00
 9 15 5 3.56 0.00
 9 15 6 -7.97 0.00
 9 15 7 6.85 0.00
 9 15 8 -4.35 0.00
 9 15 9 3.18 0.00
 9 15 10 2.44 0.00
 9 15 11 1.20 0.00
 9 15 12 1.65 0.00
 9 15 13 4.22 0.00
 9 15 14 -7.20 0.00
 9 15 15 -3.10 0.00
 9 15 16 4.26 0.00
 9 15 17 -2.83 0.00
 9 15 18 0.00 0.00
 9 17 0 6.77 0.00
 9 17 1 -2.24 0.00
 9 17 2 -0.11 0.00
 9 17 3 1.12 0.00
 9 17 4 3.04 0.00
 9 17 5 -2.48 0.00
 9 17 6 -1.69 0.00
 9 17 7 -3.58 0.00
 9 17 8 0.20 0.00
 9 17 9 1.67 0.00
 9 17 10 -0.99 0.00
 9 17 11 2.05 0.00
 9 17 12 -0.29 0.00
 9 17 13 5.39 0.00
 9 17 14 -4.00 0.00
 9 17 15 -3.32 0.00
 9 17 16 5.13 0.00
 9 17 17 1.00 0.00
 9 19 0 1.50 0.00
 9 19 1 1.66 0.00
 9 19 2 4.00 0.00
 9 19 3 1.65 0.00
 9 19 4 -1.38 0.00
 9 19 5 -1.91 0.00
 9 19 6 -5.65 0.00
 9 19 7 -4.42 0.00
 9 19 8 0.27 0.00
 9 19 9 -1.78 0.00
 9 19 10 -6.55 0.00
 9 19 11 1.13 0.00
 9 19 12 2.63 0.00
 9 19 13 2.09 0.00
 9 19 14 0.17 0.00
 9 19 15 -1.89 0.00
 9 19 16 4.61 0.00
 9 19 17 -4.23 0.00
 9 21 0 -4.00 0.00
 9 21 1 0.89 0.00
 9 21 2 -5.72 0.00
 9 21 3 0.70 0.00
 9 21 4 -2.48 0.00
 9 21 5 -5.65 0.00
 9 21 6 -5.70 0.00
 9 21 7 -4.14 0.00
 9 21 8 -1.40 0.00
 9 21 9 6.27 0.00
 9 21 10 -3.56 0.00
 9 21 11 0.26 0.00
 9 21 12 2.06 0.00
 9 21 13 2.98 0.00
 9 21 14 1.70 0.00
 9 21 15 -0.08 0.00
 9 21 16 -4.64 0.00
 9 23 0 -1.67 0.00
 9 23 1 -2.39 0.00
 9 23 2 2.14 0.00
 9 23 3 0.55 0.00
 9 23 4 -0.07 0.00
 9 23 5 0.70 0.00
 9 23 6 -0.01 0.00
 9 23 7 2.54 0.00
 9 23 8 -0.35 0.00
 9 23 9 2.86 0.00
 9 23 10 -3.71 0.00
 9 23 11 0.05 0.00
 9 23 12 2.26 0.00
 9 23 13 -0.55 0.00
 9 23 14 0.00 0.00
 9 23 15 3.01 0.00
 9 23 16 -3.61 0.00
 9 25 0 3.32 0.00
 9 25 1 0.10 0.00
 9 25 2 2.53 0.00
 9 25 3 8.25 0.00
 9 25 4 0.17 0.00
 9 25 5 3.93 0.00
 9 25 6 0.53 0.00
 9 25 7 -2.08 0.00
 9 25 8 1.39 0.00
 9 25 9 -1.13 0.00
 9 25 10 1.99 0.00
 9 25 11 -2.67 0.00
 9 25 12 1.49 0.00
 9 25 13 -3.19 0.00
 9 25 14 0.08 0.00
 9 25 15 2.48 0.00
 9 27 0 4.15 0.00
 9 27 1 0.47 0.00
 9 27 2 0.52 0.00
 9 27 3 3.38 0.00
 9 27 4 0.75 0.00
 9 27 5 0.42 0.00
 9 27 6 1.31 0.00
 9 27 7 -2.22 0.00
 9 27 8 0.79 0.00
 9 27 9 -0.43 0.00
 9 27 10 6.26 0.00
 9 27 11 -0.08 0.00
 9 27 12 0.01 0.00
 9 27 13 -3.76 0.00
 9 27 14 1.84 0.00
 9 27 15 0.41 0.00
 9 29 0 1.44 0.00
 9 29 1 -2.06 0.00
 9 29 2 0.76 0.00
 9 29 3 -2.83 0.00
 9 29 4 -1.10 0.00
 9 29 5 -2.27 0.00
 9 29 6 3.76 0.00
 9 29 7 2.26 0.00
 9 29 8 3.40 0.00
 9 29 9 0.99 0.00
 9 29 10 2.29 0.00
 9 29 11 0.50 0.00
 9 29 12 -0.86 0.00
 9 29 13 0.21 0.00
 9 29 14 5.10 0.00
 9 31 0 2.10 0.00
 9 31 1 -1.61 0.00
 9 31 2 -2.52 0.00
 9 31 3 0.12 0.00
 9 31 4 1.36 0.00
 9 31 5 -5.44 0.00
 9 31 6 0.00 0.00
 9 31 7 -0.35 0.00
 9 31 8 1.06 0.00
 9 31 9 1.99 0.00
 9 31 10 -1.85 0.00
 9 31 11 2.06 0.00
 9 31 12 -4.10 0.00
 9 31 13 3.82 0.00
 9 31 14 1.08 0.00
 9 33 0 -2.80 0.00
 9 33 1 -3.34 0.00
 9 33 2 -4.18 0.00
 9 33 3 0.50 0.00
 9 33 4 -0.86 0.00
 9 33 5 -1.19 0.00
 9 33 6 -2.40 0.00
 9 33 7 1.47 0.00
 9 33 8 -0.12 0.00
 9 33 9 2.11 0.00
 9 33 10 2.45 0.00
 9 33 11 1.16 0.00
 9 33 12 -1.14 0.00
 9 33 13 0.33 0.00
 9 35 0 1.01 0.00
 9 35 1 1.08 0.00
 9 35 2 -4.48 0.00
 9 35 3 -1.41 0.00
 9 35 4 1.19 0.00
 9 35 5 1.53 0.00
 9 35 6 0.36 0.00
 9 35 7 4.58 0.00
 9 35 8 1.59 0.00
 9 35 9 1.64 0.00
 9 35 10 -2.41 0.00
 9 35 11 -3.06 0.00
 9 35 12 -2.63 0.00
 9 37 0 1.66 0.00
 9 37 1 -0.29 0.00
 9 37 2 -1.08 0.00
 9 37 3 -0.27 0.00
 9 37 4 0.93 0.00
 9 37 5 1.42 0.00
 9 37 6 -1.85 0.00
 9 37 7 -0.04 0.00
 9 37 8 -2.91 0.00
 9 37 9 3.92 0.00
 9 37 10 -2.62 0.00
 9 39 0 0.89 0.00
 9 39 1 1.35 0.00
 9 39 2 3.16 0.00
 9 39 3 1.29 0.00
 9 39 4 -0.07 0.00
 9 39 5 1.01 0.00
 9 39 6 -3.62 0.00
 9 39 7 -2.63 0.00
 9 39 8 -1.07 0.00
 9 39 9 0.67 0.00
 9 41 0 1.32 0.00
 9 41 1 -0.18 0.00
 9 41 2 3.76 0.00
 9 41 3 0.55 0.00
 9 41 4 0.88 0.00
 9 41 5 -0.09 0.00
 9 41 6 1.15 0.00
 9 41 7 -3.74 0.00
 9 41 8 -0.03 0.00
 9 43 0 -1.38 0.00
 9 43 1 -1.55 0.00
 9 43 2 2.59 0.00
 9 43 3 -2.17 0.00
 9 43 4 0.50 0.00
 9 43 5 0.12 0.00
 9 43 6 0.62 0.00
 9 45 0 0.43 0.00
 9 45 1 -1.23 0.00
 9 45 2 0.71 0.00
 9 45 3 -1.19 0.00
 10 0 0 32.43 0.00
 10 0 1 3.24 0.00
 10 0 2 -8.52 0.00
 10 0 3 7.46 0.00
 10 0 4 -17.07 0.00
 10 0 5 14.20 0.00
 10 0 6 -6.34 0.00
 10 0 7 14.17 0.00
 10 0 8 -5.80 0.00
 10 0 9 -1.81 0.00
 10 0 10 -8.86 0.00
 10 0 11 1.20 0.00
 10 0 12 2.84 0.00
 10 0 13 3.84 0.00
 10 0 14 -2.81 0.00
 10 0 15 0.56 0.00
 10 0 16 5.96 0.00
 10 0 17 8.00 0.00
 10 0 18 -4.26 0.00
 10 2 0 25.27 0.00
 10 2 1 -2.38 0.00
 10 2 2 -7.23 0.00
 10 2 3 4.31 0.00
 10 2 4 -4.03 0.00
 10 2 5 -4.90 0.00
 10 2 6 2.98 0.00
 10 2 7 -0.60 0.00
 10 2 8 -6.11 0.00
 10 2 9 -2.45 0.00
 10 2 10 -0.16 0.00
 10 2 11 1.07 0.00
 10 2 12 2.42 0.00
 10 2 13 4.87 0.00
 10 2 14 -2.05 0.00
 10 2 15 0.99 0.00
 10 2 16 3.36 0.00
 10 2 17 0.06 0.00
 10 2 18 2.09 0.00
 10 4 0 14.00 0.00
 10 4 1 6.25 0.00
 10 4 2 2.25 0.00
 10 4 3 4.66 0.00
 10 4 4 -9.26 0.00
 10 4 5 6.50 0.00
 10 4 6 3.74 0.00
 10 4 7 2.45 0.00
 10 4 8 -4.03 0.00
 10 4 9 -4.70 0.00
 10 4 10 1.10 0.00
 10 4 11 4.95 0.00
 10 4 12 6.49 0.00
 10 4 13 5.05 0.00
 10 4 14 -4.48 0.00
 10 4 15 -1.01 0.00
 10 4 16 -1.65 0.00
 10 4 17 -0.30 0.00
 10 4 18 -1.82 0.00
 10 6 0 15.00 0.00
 10 6 1 -1.12 0.00
 10 6 2 5.27 0.00
 10 6 3 -0.27 0.00
 10 6 4 -4.72 0.00
 10 6 5 -7.19 0.00
 10 6 6 2.20 0.00
 10 6 7 -6.90 0.00
 10 6 8 -0.85 0.00
 10 6 9 -2.08 0.00
 10 6 10 8.88 0.00
 10 6 11 -0.16 0.00
 10 6 12 1.48 0.00
 10 6 13 -0.72 0.00
 10 6 14 -2.16 0.00
 10 6 15 -0.84 0.00
 10 6 16 -0.98 0.00
 10 6 17 3.37 0.00
 10 6 18 5.27 0.00
 10 8 0 0.53 0.00
 10 8 1 6.21 0.00
 10 8 2 8.43 0.00
 10 8 3 2.30 0.00
 10 8 4 -6.97 0.00
 10 8 5 -0.04 0.00
 10 8 6 -1.92 0.00
 10 8 7 2.06 0.00
 10 8 8 0.31 0.00
 10 8 9 -1.72 0.00
 10 8 10 4.02 0.00
 10 8 11 -2.93 0.00
 10 8 12 4.66 0.00
 10 8 13 -2.03 0.00
 10 8 14 2.05 0.00
 10 8 15 1.65 0.00
 10 8 16 1.77 0.00
 10 8 17 1.96 0.00
 10 8 18 4.05 0.00
 10 10 0 4.48 0.00
 10 10 1 -6.33 0.00
 10 10 2 6.64 0.00
 10 10 3 -3.09 0.00
 10 10 4 -4.82 0.00
 10 10 5 -1.89 0.00
 10 10 6 -7.28 0.00
 10 10 7 5.61 0.00
 10 10 8 -1.11 0.00
 10 10 9 -3.92 0.00
 10 10 10 -2.35 0.00
 10 10 11 -0.57 0.00
 10 10 12 -1.18 0.00
 10 10 13 1.68 0.00
 10 10 14 -0.66 0.00
 10 10 15 0.66 0.00
 10 10 16 0.86 0.00
 10 10 17 1.44 0.00
 10 10 18 3.33 0.00
 10 12 0 -8.46 0.00
 10 12 1 -0.17 0.00
 10 12 2 4.48 0.00
 10 12 3 0.21 0.00
 10 12 4 1.60 0.00
 10 12 5 3.75 0.00
 10 12 6 -0.82 0.00
 10 12 7 1.69 0.00
 10 12 8 0.61 0.00
 10 12 9 -2.60 0.00
 10 12 10 -3.71 0.00
 10 12 11 4.20 0.00
 10 12 12 -7.12 0.00
 10 12 13 0.58 0.00
 10 12 14 -3.04 0.00
 10 12 15 0.21 0.00
 10 12 16 1.75 0.00
 10 12 17 3.84 0.00
 10 12 18 6.66 0.00
 10 14 0 -3.29 0.00
 10 14 1 -14.91 0.00
 10 14 2 0.84 0.00
 10 14 3 -3.27 0.00
 10 14 4 6.41 0.00
 10 14 5 -1.64 0.00
 10 14 6 -1.11 0.00
 10 14 7 -6.69 0.00
 10 14 8 3.65 0.00
 10 14 9 -0.75 0.00
 10 14 10 -3.92 0.00
 10 14 11 2.95 0.00
 10 14 12 4.58 0.00
 10 14 13 -3.31 0.00
 10 14 14 -0.14 0.00
 10 14 15 -2.65 0.00
 10 14 16 3.01 0.00
 10 14 17 0.32 0.00
 10 16 0 -1.80 0.00
 10 16 1 1.25 0.00
 10 16 2 0.00 0.00
 10 16 3 -0.27 0.00
 10 16 4 8.51 0.00
 10 16 5 4.05 0.00
 10 16 6 2.46 0.00
 10 16 7 0.61 0.00
 10 16 8 1.15 0.00
 10 16 9 5.52 0.00
 10 16 10 -0.60 0.00
 10 16 11 2.26 0.00
 10 16 12 1.28 0.00
 10 16 13 -3.92 0.00
 10 16 14 -1.33 0.00
 10 16 15 -4.71 0.00
 10 16 16 1.04 0.00
 10 16 17 5.10 0.00
 10 18 0 -2.22 0.00
 10 18 1 -3.88 0.00
 10 18 2 -1.79 0.00
 10 18 3 -0.18 0.00
 10 18 4 6.93 0.00
 10 18 5 0.32 0.00
 10 18 6 -0.74 0.00
 10 18 7 -2.53 0.00
 10 18 8 2.70 0.00
 10 18 9 1.74 0.00
 10 18 10 -2.74 0.00
 10 18 11 0.85 0.00
 10 18 12 3.71 0.00
 10 18 13 3.94 0.00
 10 18 14 -1.65 0.00
 10 18 15 0.84 0.00
 10 18 16 -3.80 0.00
 10 18 17 1.52 0.00
 10 20 0 -1.57 0.00
 10 20 1 -0.94 0.00
 10 20 2 -1.60 0.00
 10 20 3 2.67 0.00
 10 20 4 2.09 0.00
 10 20 5 2.31 0.00
 10 20 6 -4.22 0.00
 10 20 7 -2.85 0.00
 10 20 8 -3.48 0.00
 10 20 9 -0.65 0.00
 10 20 10 1.21 0.00
 10 20 11 -1.02 0.00
 10 20 12 -1.06 0.00
 10 20 13 5.76 0.00
 10 20 14 3.22 0.00
 10 20 15 0.29 0.00
 10 20 16 -3.28 0.00
 10 22 0 0.50 0.00
 10 22 1 -0.78 0.00
 10 22 2 -1.95 0.00
 10 22 3 -0.81 0.00
 10 22 4 -3.37 0.00
 10 22 5 -1.53 0.00
 10 22 6 -3.18 0.00
 10 22 7 -3.43 0.00
 10 22 8 2.07 0.00
 10 22 9 -1.26 0.00
 10 22 10 -0.02 0.00
 10 22 11 -1.12 0.00
 10 22 12 -2.25 0.00
 10 22 13 6.42 0.00
 10 22 14 4.35 0.00
 10 22 15 -1.29 0.00
 10 22 16 -1.40 0.00
 10 24 0 -4.21 0.00
 10 24 1 -0.48 0.00
 10 24 2 -0.23 0.00
 10 24 3 0.49 0.00
 10 24 4 3.20 0.00
 10 24 5 -1.54 0.00
 10 24 6 -0.01 0.00
 10 24 7 -3.05 0.00
 10 24 8 -2.49 0.00
 10 24 9 -0.70 0.00
 10 24 10 1.51 0.00
 10 24 11 -0.18 0.00
 10 24 12 -2.29 0.00
 10 24 13 1.24 0.00
 10 24 14 2.72 0.00
 10 24 15 -0.13 0.00
 10 26 0 -4.27 0.00
 10 26 1 5.07 0.00
 10 26 2 1.71 0.00
 10 26 3 3.29 0.00
 10 26 4 1.10 0.00
 10 26 5 1.42 0.00
 10 26 6 0.07 0.00
 10 26 7 0.22 0.00
 10 26 8 -0.16 0.00
 10 26 9 4.83 0.00
 10 26 10 6.66 0.00
 10 26 11 2.76 0.00
 10 26 12 -5.10 0.00
 10 26 13 -0.40 0.00
 10 26 14 -0.80 0.00
 10 28 0 1.61 0.00
 10 28 1 0.03 0.00
 10 28 2 2.21 0.00
 10 28 3 -1.19 0.00
 10 28 4 3.02 0.00
 10 28 5 1.05 0.00
 10 28 6 1.56 0.00
 10 28 7 3.03 0.00
 10 28 8 -1.52 0.00
 10 28 9 3.61 0.00
 10 28 10 2.63 0.00
 10 28 11 -0.23 0.00
 10 28 12 -4.11 0.00
 10 28 13 -4.26 0.00
 10 28 14 0.89 0.00
 10 30 0 -0.59 0.00
 10 30 1 -1.44 0.00
 10 30 2 4.82 0.00
 10 30 3 -0.95 0.00
 10 30 4 1.05 0.00
 10 30 5 -1.89 0.00
 10 30 6 2.30 0.00
 10 30 7 -0.66 0.00
 10 30 8 -1.57 0.00
 10 30 9 -0.19 0.00
 10 30 10 0.31 0.00
 10 30 11 -2.06 0.00
 10 30 12 -0.59 0.00
 10 30 13 -1.04 0.00
 10 32 0 -1.87 0.00
 10 32 1 -1.45 0.00
 10 32 2 0.57 0.00
 10 32 3 -1.30 0.00
 10 32 4 3.40 0.00
 10 32 5 -3.63 0.00
 10 32 6 -1.19 0.00
 10 32 7 -3.39 0.00
 10 32 8 -2.97 0.00
 10 32 9 1.46 0.00
 10 32 10 0.83 0.00
 10 32 11 2.50 0.00
 10 32 12 1.44 0.00
 10 32 13 6.46 0.00
 10 34 0 -1.20 0.00
 10 34 1 0.65 0.00
 10 34 2 -1.18 0.00
 10 34 3 1.35 0.00
 10 34 4 -2.01 0.00
 10 34 5 1.67 0.00
 10 34 6 1.40 0.00
 10 34 7 0.67 0.00
 10 34 8 -0.11 0.00
 10 34 9 -0.35 0.00
 10 34 10 1.01 0.00
 10 34 11 -2.30 0.00
 10 34 12 -3.42 0.00
 10 36 0 0.07 0.00
 10 36 1 -1.85 0.00
 10 36 2 -1.58 0.00
 10 36 3 -1.90 0.00
 10 36 4 3.23 0.00
 10 36 5 -1.93 0.00
 10 36 6 6.07 0.00
 10 36 7 -3.47 0.00
 10 36 8 0.02 0.00
 10 36 9 2.22 0.00
 10 36 10 -1.41 0.00
 10 38 0 0.36 0.00
 10 38 1 0.55 0.00
 10 38 2 -1.34 0.00
 10 38 3 -0.02 0.00
 10 38 4 1.31 0.00
 10 38 5 -2.98 0.00
 10 38 6 2.81 0.00
 10 38 7 1.21 0.00
 10 38 8 0.55 0.00
 10 38 9 4.12 0.00
 10 40 0 -7.07 0.00
 10 40 1 1.52 0.00
 10 40 2 -1.39 0.00
 10 40 3 6.18 0.00
 10 40 4 -1.18 0.00
 10 40 5 3.53 0.00
 10 40 6 -1.80 0.00
 10 40 7 -0.87 0.00
 10 40 8 0.47 0.00
 10 42 0 -4.53 0.00
 10 42 1 -1.56 0.00
 10 42 2 -4.82 0.00
 10 42 3 -0.32 0.00
 10 42 4 -2.32 0.00
 10 42 5 -2.46 0.00
 10 42 6 -1.60 0.00
 10 44 0 -2.63 0.00
 10 44 1 -0.12 0.00
 10 44 2 1.76 0.00
 10 44 3 -1.15 0.00
 11 1 0 -5.23 0.00
 11 1 1 -9.75 0.00
 11 1 2 -2.62 0.00
 11 1 3 6.14 0.00
 11 1 4 4.60 0.00
 11 1 5 6.72 0.00
 11 1 6 -6.59 0.00
 11 1 7 1.04 0.00
 11 1 8 -1.66 0.00
 11 1 9 -1.75 0.00
 11 1 10 -2.90 0.00
 11 1 11 1.69 0.00
 11 1 12 4.61 0.00
 11 1 13 3.77 0.00
 11 1 14 5.23 0.00
 11 1 15 -5.87 0.00
 11 1 16 8.46 0.00
 11 1 17 1.51 0.00
 11 1 18 -3.40 0.00
 11 3 0 -10.53 0.00
 11 3 1 -14.49 0.00
 11 3 2 -3.72 0.00
 11 3 3 2.42 0.00
 11 3 4 4.95 0.00
 11 3 5 3.26 0.00
 11 3 6 -5.78 0.00
 11 3 7 -3.94 0.00
 11 3 8 -4.09 0.00
 11 3 9 -1.75 0.00
 11 3 10 -2.53 0.00
 11 3 11 2.41 0.00
 11 3 12 3.20 0.00
 11 3 13 0.56 0.00
 11 3 14 -0.44 0.00
 11 3 15 -2.96 0.00
 11 3 16 2.19 0.00
 11 3 17 -1.22 0.00
 11 3 18 -0.74 0.00
 11 5 0 -5.67 0.00
 11 5 1 -14.55 0.00
 11 5 2 2.00 0.00
 11 5 3 5.37 0.00
 11 5 4 3.25 0.00
 11 5 5 5.29 0.00
 11 5 6 1.55 0.00
 11 5 7 0.67 0.00
 11 5 8 5.84 0.00
 11 5 9 -4.57 0.00
 11 5 10 1.75 0.00
 11 5 11 1.43 0.00
 11 5 12 -1.08 0.00
 11 5 13 0.35 0.00
 11 5 14 -2.40 0.00
 11 5 15 0.44 0.00
 11 5 16 -0.71 0.00
 11 5 17 7.18 0.00
 11 5 18 -1.95 0.00
 11 7 0 -3.53 0.00
 11 7 1 -5.68 0.00
 11 7 2 2.24 0.00
 11 7 3 1.51 0.00
 11 7 4 2.13 0.00
 11 7 5 2.26 0.00
 11 7 6 0.36 0.00
 11 7 7 1.83 0.00
 11 7 8 7.98 0.00
 11 7 9 1.80 0.00
 11 7 10 0.20 0.00
 11 7 11 -1.88 0.00
 11 7 12 -0.35 0.00
 11 7 13 -4.91 0.00
 11 7 14 -0.53 0.00
 11 7 15 1.74 0.00
 11 7 16 1.04 0.00
 11 7 17 -0.88 0.00
 11 7 18 4.43 0.00
 11 9 0 5.96 0.00
 11 9 1 -5.06 0.00
 11 9 2 4.85 0.00
 11 9 3 2.92 0.00
 11 9 4 -0.76 0.00
 11 9 5 -3.14 0.00
 11 9 6 4.41 0.00
 11 9 7 6.06 0.00
 11 9 8 3.66 0.00
 11 9 9 1.20 0.00
 11 9 10 -3.28 0.00
 11 9 11 1.68 0.00
 11 9 12 3.39 0.00
 11 9 13 0.75 0.00
 11 9 14 1.63 0.00
 11 9 15 3.51 0.00
 11 9 16 -2.62 0.00
 11 9 17 -0.43 0.00
 11 11 0 -1.16 0.00
 11 11 1 6.13 0.00
 11 11 2 0.59 0.00
 11 11 3 0.24 0.00
 11 11 4 -3.13 0.00
 11 11 5 -4.97 0.00
 11 11 6 -1.65 0.00
 11 11 7 1.52 0.00
 11 11 8 -0.91 0.00
 11 11 9 1.62 0.00
 11 11 10 0.92 0.00
 11 11 11 1.74 0.00
 11 11 13 1.12 0.00
 11 11 14 3.17 0.00
 11 11 15 0.39 0.00
 11 11 16 -3.49 0.00
 11 11 17 0.24 0.00
 11 13 0 6.84 0.00
 11 13 1 0.56 0.00
 11 13 2 -0.80 0.00
 11 13 3 1.17 0.00
 11 13 4 3.70 0.00
 11 13 5 -7.98 0.00
 11 13 6 -2.82 0.00
 11 13 7 -5.01 0.00
 11 13 8 -8.88 0.00
 11 13 9 -1.72 0.00
 11 13 10 3.05 0.00
 11 13 11 0.81 0.00
 11 13 12 2.36 0.00
 11 13 13 0.80 0.00
 11 13 14 -0.41 0.00
 11 13 15 -1.44 0.00
 11 13 16 -0.14 0.00
 11 13 17 5.09 0.00
 11 15 0 4.40 0.00
 11 15 1 5.37 0.00
 11 15 2 -0.10 0.00
 11 15 3 0.62 0.00
 11 15 4 -1.29 0.00
 11 15 5 1.53 0.00
 11 15 6 -5.84 0.00
 11 15 7 3.01 0.00
 11 15 8 -5.62 0.00
 11 15 9 0.63 0.00
 11 15 10 4.19 0.00
 11 15 11 -1.37 0.00
 11 15 12 2.16 0.00
 11 15 13 2.50 0.00
 11 15 14 1.36 0.00
 11 15 15 -5.22 0.00
 11 15 16 4.14 0.00
 11 15 17 2.56 0.00
 11 17 0 4.91 0.00
 11 17 1 -4.26 0.00
 11 17 2 -6.75 0.00
 11 17 3 1.10 0.00
 11 17 4 2.31 0.00
 11 17 5 3.50 0.00
 11 17 6 -1.02 0.00
 11 17 7 -2.11 0.00
 11 17 8 -0.99 0.00
 11 17 9 0.13 0.00
 11 17 10 5.58 0.00
 11 17 11 -1.46 0.00
 11 17 12 1.49 0.00
 11 17 13 1.28 0.00
 11 17 14 -0.08 0.00
 11 17 15 -1.27 0.00
 11 17 16 1.71 0.00
 11 19 0 -1.02 0.00
 11 19 1 0.62 0.00
 11 19 2 3.48 0.00
 11 19 3 1.85 0.00
 11 19 4 4.75 0.00
 11 19 5 3.65 0.00
 11 19 6 2.38 0.00
 11 19 7 -2.13 0.00
 11 19 8 -0.19 0.00
 11 19 9 -2.80 0.00
 11 19 10 3.28 0.00
 11 19 11 -5.57 0.00
 11 19 12 1.78 0.00
 11 19 13 2.06 0.00
 11 19 14 -1.40 0.00
 11 19 15 0.58 0.00
 11 19 16 -4.92 0.00
 11 21 0 0.52 0.00
 11 21 1 3.54 0.00
 11 21 2 0.55 0.00
 11 21 3 2.96 0.00
 11 21 4 1.97 0.00
 11 21 5 6.76 0.00
 11 21 6 -1.74 0.00
 11 21 7 1.65 0.00
 11 21 8 -2.09 0.00
 11 21 9 1.72 0.00
 11 21 10 0.27 0.00
 11 21 11 -4.73 0.00
 11 21 12 -0.41 0.00
 11 21 13 0.58 0.00
 11 21 14 -0.86 0.00
 11 21 15 -1.94 0.00
 11 23 0 0.85 0.00
 11 23 1 -2.06 0.00
 11 23 2 5.99 0.00
 11 23 3 -5.18 0.00
 11 23 4 0.21 0.00
 11 23 5 2.00 0.00
 11 23 6 -2.13 0.00
 11 23 7 0.38 0.00
 11 23 8 -2.92 0.00
 11 23 9 1.63 0.00
 11 23 10 0.13 0.00
 11 23 11 3.30 0.00
 11 23 12 1.06 0.00
 11 23 13 3.87 0.00
 11 23 14 1.74 0.00
 11 23 15 0.40 0.00
 11 25 0 -3.90 0.00
 11 25 1 0.36 0.00
 11 25 2 2.45 0.00
 11 25 3 -1.50 0.00
 11 25 4 -2.75 0.00
 11 25 5 -2.22 0.00
 11 25 6 -0.15 0.00
 11 25 7 -5.30 0.00
 11 25 8 0.72 0.00
 11 25 9 2.83 0.00
 11 25 10 2.43 0.00
 11 25 11 5.37 0.00
 11 25 12 3.09 0.00
 11 25 13 0.58 0.00
 11 25 14 2.29 0.00
 11 27 0 -3.37 0.00
 11 27 1 0.88 0.00
 11 27 2 1.55 0.00
 11 27 3 -4.62 0.00
 11 27 4 -0.16 0.00
 11 27 5 -1.99 0.00
 11 27 6 1.25 0.00
 11 27 7 -3.85 0.00
 11 27 8 -1.91 0.00
 11 27 9 3.54 0.00
 11 27 10 0.52 0.00
 11 27 11 4.00 0.00
 11 27 12 -3.64 0.00
 11 27 13 -1.79 0.00
 11 29 0 -3.91 0.00
 11 29 1 -1.48 0.00
 11 29 2 0.22 0.00
 11 29 3 -2.11 0.00
 11 29 4 -4.75 0.00
 11 29 5 3.87 0.00
 11 29 6 -0.31 0.00
 11 29 7 1.96 0.00
 11 29 8 -1.91 0.00
 11 29 9 -1.49 0.00
 11 29 10 -2.71 0.00
 11 29 11 0.96 0.00
 11 29 12 -0.51 0.00
 11 29 13 0.09 0.00
 11 31 0 1.31 0.00
 11 31 1 -1.05 0.00
 11 31 2 3.05 0.00
 11 31 3 -0.96 0.00
 11 31 4 2.11 0.00
 11 31 5 -0.58 0.00
 11 31 6 -0.74 0.00
 11 31 7 -0.86 0.00
 11 31 8 -0.70 0.00
 11 31 9 -0.09 0.00
 11 31 10 -0.43 0.00
 11 31 11 0.40 0.00
 11 31 12 5.93 0.00
 11 33 0 0.62 0.00
 11 33 1 2.59 0.00
 11 33 2 -0.73 0.00
 11 33 3 3.01 0.00
 11 33 4 0.77 0.00
 11 33 5 4.15 0.00
 11 33 6 -1.99 0.00
 11 33 7 -0.26 0.00
 11 33 8 -0.55 0.00
 11 33 9 -2.70 0.00
 11 33 10 3.87 0.00
 11 33 11 3.19 0.00
 11 35 0 1.62 0.00
 11 35 1 3.12 0.00
 11 35 2 -1.70 0.00
 11 35 3 -1.28 0.00
 11 35 4 -1.52 0.00
 11 35 5 -0.15 0.00
 11 35 6 -4.34 0.00
 11 35 7 -1.12 0.00
 11 35 8 -2.74 0.00
 11 35 9 -4.42 0.00
 11 35 10 -2.81 0.00
 11 37 0 4.65 0.00
 11 37 1 -1.49 0.00
 11 37 2 -0.22 0.00
 11 37 3 -3.65 0.00
 11 37 4 1.40 0.00
 11 37 5 -0.88 0.00
 11 37 6 -0.04 0.00
 11 37 7 -1.11 0.00
 11 37 8 2.20 0.00
 11 37 9 0.88 0.00
 11 39 0 -1.41 0.00
 11 39 1 3.80 0.00
 11 39 2 -1.00 0.00
 11 39 3 4.01 0.00
 11 39 4 -1.77 0.00
 11 39 5 2.43 0.00
 11 39 6 -1.52 0.00
 11 39 7 1.62 0.00
 11 39 8 1.31 0.00
 11 41 0 -1.59 0.00
 11 41 1 1.53 0.00
 11 41 2 -1.41 0.00
 11 41 3 2.46 0.00
 11 41 4 -1.15 0.00
 11 41 5 4.92 0.00
 11 41 6 -1.21 0.00
 11 43 0 -1.97 0.00
 11 43 1 4.69 0.00
 11 43 2 -0.57 0.00
 11 43 3 -0.28 0.00
 12 0 0 1.84 0.00
 12 0 1 -1.00 0.00
 12 0 2 -0.28 0.00
 12 0 3 0.02 0.00
 12 0 4 7.82 0.00
 12 0 5 0.98 0.00
 12 0 6 2.00 0.00
 12 0 7 3.12 0.00
 12 0 8 7.94 0.00
 12 0 9 -1.17 0.00
 12 0 10 1.98 0.00
 12 0 11 -2.22 0.00
 12 0 12 3.87 0.00
 12 0 13 -1.03 0.00
 12 0 14 -3.72 0.00
 12 0 15 -2.44 0.00
 12 0 16 0.85 0.00
 12 0 17 0.24 0.00
 12 2 0 -11.62 0.00
 12 2 1 -4.63 0.00
 12 2 2 -4.50 0.00
 12 2 3 -0.93 0.00
 12 2 4 10.84 0.00
 12 2 5 -8.76 0.00
 12 2 6 -5.19 0.00
 12 2 7 -6.37 0.00
 12 2 8 0.76 0.00
 12 2 9 -0.12 0.00
 12 2 10 -0.85 0.00
 12 2 11 -1.38 0.00
 12 2 12 0.03 0.00
 12 2 13 0.20 0.00
 12 2 14 -2.62 0.00
 12 2 15 -0.09 0.00
 12 2 16 3.40 0.00
 12 2 17 -3.28 0.00
 12 4 0 -9.10 0.00
 12 4 1 -2.88 0.00
 12 4 2 -4.11 0.00
 12 4 3 0.75 0.00
 12 4 4 3.91 0.00
 12 4 5 -0.91 0.00
 12 4 6 -1.80 0.00
 12 4 7 -0.71 0.00
 12 4 8 1.07 0.00
 12 4 9 -1.06 0.00
 12 4 10 3.09 0.00
 12 4 11 3.39 0.00
 12 4 12 4.15 0.00
 12 4 13 -0.99 0.00
 12 4 14 -0.40 0.00
 12 4 15 0.20 0.00
 12 4 16 2.10 0.00
 12 4 17 2.01 0.00
 12 6 0 -12.16 0.00
 12 6 1 -1.59 0.00
 12 6 2 0.64 0.00
 12 6 3 1.42 0.00
 12 6 4 6.03 0.00
 12 6 5 -5.11 0.00
 12 6 6 -3.10 0.00
 12 6 7 -3.99 0.00
 12 6 8 1.00 0.00
 12 6 9 -5.17 0.00
 12 6 10 -3.78 0.00
 12 6 11 1.22 0.00
 12 6 12 -2.75 0.00
 12 6 13 0.75 0.00
 12 6 14 1.75 0.00
 12 6 15 1.57 0.00
 12 6 16 1.99 0.00
 12 6 17 8.58 0.00
 12 8 0 5.62 0.00
 12 8 1 4.69 0.00
 12 8 2 4.02 0.00
 12 8 3 -1.00 0.00
 12 8 4 0.62 0.00
 12 8 5 1.51 0.00
 12 8 6 1.64 0.00
 12 8 7 7.92 0.00
 12 8 8 -1.99 0.00
 12 8 9 -2.48 0.00
 12 8 10 -5.89 0.00
 12 8 11 5.23 0.00
 12 8 12 -2.17 0.00
 12 8 13 1.24 0.00
 12 8 14 0.53 0.00
 12 8 15 0.51 0.00
 12 8 16 -2.02 0.00
 12 8 17 -1.39 0.00
 12 10 0 -8.33 0.00
 12 10 1 0.49 0.00
 12 10 2 0.35 0.00
 12 10 3 3.30 0.00
 12 10 4 -1.98 0.00
 12 10 5 2.43 0.00
 12 10 6 2.09 0.00
 12 10 7 6.09 0.00
 12 10 8 2.71 0.00
 12 10 9 -2.17 0.00
 12 10 10 -2.15 0.00
 12 10 11 6.83 0.00
 12 10 12 2.56 0.00
 12 10 13 3.00 0.00
 12 10 14 0.97 0.00
 12 10 15 -0.88 0.00
 12 10 16 -3.04 0.00
 12 10 17 -0.87 0.00
 12 12 0 5.91 0.00
 12 12 1 1.65 0.00
 12 12 2 -1.37 0.00
 12 12 3 -2.33 0.00
 12 12 4 -3.90 0.00
 12 12 5 -1.93 0.00
 12 12 6 0.66 0.00
 12 12 7 -0.04 0.00
 12 12 8 -0.90 0.00
 12 12 9 -0.24 0.00
 12 12 10 1.43 0.00
 12 12 11 7.22 0.00
 12 12 12 -0.25 0.00
 12 12 13 -0.27 0.00
 12 12 14 -1.04 0.00
 12 12 15 2.02 0.00
 12 12 16 -0.80 0.00
 12 12 17 -1.97 0.00
 12 14 0 -0.61 0.00
 12 14 1 -1.49 0.00
 12 14 2 -0.96 0.00
 12 14 3 0.08 0.00
 12 14 4 -1.76 0.00
 12 14 5 -4.79 0.00
 12 14 6 0.71 0.00
 12 14 7 -4.17 0.00
 12 14 8 -0.30 0.00
 12 14 9 1.69 0.00
 12 14 10 -0.59 0.00
 12 14 11 6.35 0.00
 12 14 12 8.99 0.00
 12 14 13 5.62 0.00
 12 14 14 -2.61 0.00
 12 14 15 7.76 0.00
 12 14 16 1.60 0.00
 12 16 0 7.21 0.00
 12 16 1 2.86 0.00
 12 16 2 -2.60 0.00
 12 16 3 -3.83 0.00
 12 16 4 -2.73 0.00
 12 16 5 -7.69 0.00
 12 16 6 -0.93 0.00
 12 16 7 -4.98 0.00
 12 16 8 -0.16 0.00
 12 16 9 -1.77 0.00
 12 16 10 2.79 0.00
 12 16 11 -1.41 0.00
 12 16 12 2.61 0.00
 12 16 13 -0.96 0.00
 12 16 14 0.13 0.00
 12 16 15 1.35 0.00
 12 16 16 3.61 0.00
 12 18 0 2.75 0.00
 12 18 1 0.52 0.00
 12 18 2 5.03 0.00
 12 18 3 -0.65 0.00
 12 18 4 0.37 0.00
 12 18 5 -5.25 0.00
 12 18 6 0.57 0.00
 12 18 7 -8.14 0.00
 12 18 8 2.20 0.00
 12 18 9 -3.86 0.00
 12 18 10 1.23 0.00
 12 18 11 -0.71 0.00
 12 18 12 1.67 0.00
 12 18 13 2.81 0.00
 12 18 14 -2.31 0.00
 12 18 15 -0.89 0.00
 12 18 16 -0.54 0.00
 12 20 0 3.44 0.00
 12 20 1 8.22 0.00
 12 20 2 2.91 0.00
 12 20 3 12.37 0.00
 12 20 4 -0.58 0.00
 12 20 5 0.00 0.00
 12 20 6 1.05 0.00
 12 20 7 -2.70 0.00
 12 20 8 -0.43 0.00
 12 20 9 0.92 0.00
 12 20 10 0.31 0.00
 12 20 11 -3.91 0.00
 12 20 12 -1.04 0.00
 12 20 13 -3.68 0.00
 12 20 14 1.24 0.00
 12 20 15 -7.27 0.00
 12 22 0 -0.29 0.00
 12 22 1 3.76 0.00
 12 22 2 2.13 0.00
 12 22 3 0.90 0.00
 12 22 4 -3.28 0.00
 12 22 5 1.77 0.00
 12 22 6 7.18 0.00
 12 22 7 -0.35 0.00
 12 22 8 1.55 0.00
 12 22 9 2.00 0.00
 12 22 10 -1.16 0.00
 12 22 11 0.56 0.00
 12 22 12 2.10 0.00
 12 22 13 0.03 0.00
 12 22 14 -0.27 0.00
 12 22 15 -7.16 0.00
 12 24 0 -0.87 0.00
 12 24 1 -0.53 0.00
 12 24 2 1.45 0.00
 12 24 3 3.89 0.00
 12 24 4 -0.34 0.00
 12 24 5 -1.99 0.00
 12 24 6 -0.20 0.00
 12 24 7 -1.96 0.00
 12 24 8 -1.24 0.00
 12 24 9 2.31 0.00
 12 24 10 0.25 0.00
 12 24 11 3.35 0.00
 12 24 12 3.87 0.00
 12 24 13 4.09 0.00
 12 24 14 -2.31 0.00
 12 26 0 -4.29 0.00
 12 26 1 3.06 0.00
 12 26 2 -0.15 0.00
 12 26 3 -1.19 0.00
 12 26 4 -5.96 0.00
 12 26 5 1.89 0.00
 12 26 6 0.56 0.00
 12 26 7 -2.27 0.00
 12 26 8 -3.54 0.00
 12 26 9 0.09 0.00
 12 26 10 -0.20 0.00
 12 26 11 1.09 0.00
 12 26 12 0.61 0.00
 12 26 13 2.12 0.00
 12 28 0 -2.34 0.00
 12 28 1 0.96 0.00
 12 28 2 -5.67 0.00
 12 28 3 0.91 0.00
 12 28 4 -5.51 0.00
 12 28 5 5.21 0.00
 12 28 6 -5.15 0.00
 12 28 7 0.19 0.00
 12 28 8 -1.95 0.00
 12 28 9 -2.47 0.00
 12 28 10 -2.93 0.00
 12 28 11 0.41 0.00
 12 28 12 4.92 0.00
 12 30 0 -2.08 0.00
 12 30 1 -2.27 0.00
 12 30 2 -0.53 0.00
 12 30 3 -3.05 0.00
 12 30 4 -2.83 0.00
 12 30 5 2.53 0.00
 12 30 6 1.51 0.00
 12 30 7 1.58 0.00
 12 30 8 2.79 0.00
 12 30 9 2.64 0.00
 12 30 10 -1.34 0.00
 12 30 11 2.41 0.00
 12 32 0 2.90 0.00
 12 32 1 -1.21 0.00
 12 32 2 0.02 0.00
 12 32 3 -1.94 0.00
 12 32 4 5.28 0.00
 12 32 5 2.16 0.00
 12 32 6 -2.63 0.00
 12 32 7 -0.36 0.00
 12 32 8 2.07 0.00
 12 32 9 1.06 0.00
 12 32 10 -2.14 0.00
 12 32 11 2.74 0.00
 12 34 0 3.12 0.00
 12 34 1 0.97 0.00
 12 34 2 -1.90 0.00
 12 34 3 2.68 0.00
 12 34 4 -1.73 0.00
 12 34 5 4.41 0.00
 12 34 6 -2.74 0.00
 12 34 7 -1.63 0.00
 12 34 8 4.01 0.00
 12 34 9 -2.83 0.00
 12 34 10 -1.89 0.00
 12 36 0 6.05 0.00
 12 36 1 -3.78 0.00
 12 36 2 0.12 0.00
 12 36 3 -4.72 0.00
 12 36 4 2.64 0.00
 12 36 5 -3.35 0.00
 12 36 6 -2.27 0.00
 12 36 7 -7.16 0.00
 12 36 8 2.31 0.00
 12 36 9 -3.54 0.00
 12 38 0 0.72 0.00
 12 38 1 0.99 0.00
 12 38 2 -3.15 0.00
 12 38 3 -2.39 0.00
 12 38 4 0.49 0.00
 12 38 5 -3.88 0.00
 12 38 6 0.46 0.00
 12 38 7 -1.41 0.00
 12 40 0 4.09 0.00
 12 40 1 2.19 0.00
 12 40 2 4.73 0.00
 12 40 3 3.92 0.00
 12 40 4 1.96 0.00
 12 40 5 5.39 0.00
 12 40 6 -0.13 0.00
 12 42 1 2.82 0.00
 12 42 2 4.74 0.00
 12 42 3 -0.89 0.00
 13 1 0 12.20 0.00
 13 1 1 11.06 0.00
 13 1 2 2.66 0.00
 13 1 3 -3.73 0.00
 13 1 4 -2.42 0.00
 13 1 5 -6.95 0.00
 13 1 6 2.74 0.00
 13 1 7 -1.92 0.00
 13 1 8 3.92 0.00
 13 1 9 0.81 0.00
 13 1 10 -0.89 0.00
 13 1 11 -5.64 0.00
 13 1 12 1.20 0.00
 13 1 13 -2.11 0.00
 13 1 14 -2.91 0.00
 13 1 15 0.91 0.00
 13 1 16 -1.79 0.00
 13 3 0 4.23 0.00
 13 3 1 8.58 0.00
 13 3 2 1.97 0.00
 13 3 3 -2.86 0.00
 13 3 4 -1.36 0.00
 13 3 5 -5.28 0.00
 13 3 6 -4.22 0.00
 13 3 7 -2.02 0.00
 13 3 8 -0.70 0.00
 13 3 9 5.60 0.00
 13 3 10 1.05 0.00
 13 3 11 -1.05 0.00
 13 3 12 2.41 0.00
 13 3 13 -4.44 0.00
 13 3 14 -4.41 0.00
 13 3 15 0.41 0.00
 13 3 16 0.55 0.00
 13 3 17 -3.90 0.00
 13 5 0 1.71 0.00
 13 5 1 5.52 0.00
 13 5 2 1.65 0.00
 13 5 3 0.73 0.00
 13 5 4 -1.96 0.00
 13 5 5 -5.71 0.00
 13 5 6 -3.03 0.00
 13 5 7 -1.30 0.00
 13 5 8 -3.07 0.00
 13 5 9 -1.20 0.00
 13 5 10 -3.24 0.00
 13 5 11 0.38 0.00
 13 5 12 4.19 0.00
 13 5 13 0.61 0.00
 13 5 14 -0.73 0.00
 13 5 15 1.73 0.00
 13 5 16 3.39 0.00
 13 5 17 5.89 0.00
 13 7 0 -7.13 0.00
 13 7 1 9.97 0.00
 13 7 2 -1.53 0.00
 13 7 3 -2.42 0.00
 13 7 4 -6.85 0.00
 13 7 5 -2.68 0.00
 13 7 6 -8.40 0.00
 13 7 7 0.66 0.00
 13 7 8 -8.38 0.00
 13 7 9 1.08 0.00
 13 7 10 -7.91 0.00
 13 7 11 4.47 0.00
 13 7 12 4.16 0.00
 13 7 13 1.63 0.00
 13 7 14 -2.26 0.00
 13 7 15 0.89 0.00
 13 7 16 1.54 0.00
 13 7 17 -2.31 0.00
 13 9 0 1.51 0.00
 13 9 1 4.60 0.00
 13 9 2 -0.74 0.00
 13 9 3 2.92 0.00
 13 9 4 -3.03 0.00
 13 9 5 -0.21 0.00
 13 9 6 0.45 0.00
 13 9 7 4.46 0.00
 13 9 8 -8.11 0.00
 13 9 9 -1.25 0.00
 13 9 10 -8.90 0.00
 13 9 11 6.89 0.00
 13 9 12 3.63 0.00
 13 9 13 3.97 0.00
 13 9 14 -2.96 0.00
 13 9 15 3.43 0.00
 13 9 16 -0.93 0.00
 13 11 0 -7.16 0.00
 13 11 1 0.55 0.00
 13 11 2 4.21 0.00
 13 11 3 -1.91 0.00
 13 11 4 1.13 0.00
 13 11 5 1.32 0.00
 13 11 6 0.24 0.00
 13 11 7 1.36 0.00
 13 11 8 0.51 0.00
 13 11 9 -2.60 0.00
 13 11 10 1.24 0.00
 13 11 11 1.12 0.00
 13 11 12 2.71 0.00
 13 11 13 -2.87 0.00
 13 11 14 4.27 0.00
 13 11 15 -0.66 0.00
 13 11 16 2.50 0.00
 13 13 0 0.81 0.00
 13 13 1 -6.27 0.00
 13 13 2 -1.68 0.00
 13 13 3 0.72 0.00
 13 13 4 2.12 0.00
 13 13 5 0.64 0.00
 13 13 6 -3.33 0.00
 13 13 7 0.07 0.00
 13 13 8 2.35 0.00
 13 13 9 -2.88 0.00
 13 13 10 1.26 0.00
 13 13 11 5.50 0.00
 13 13 12 -0.07 0.00
 13 13 13 1.17 0.00
 13 13 14 2.07 0.00
 13 13 15 3.50 0.00
 13 13 16 8.61 0.00
 13 15 0 -6.27 0.00
 13 15 1 -0.08 0.00
 13 15 2 -3.26 0.00
 13 15 3 2.03 0.00
 13 15 4 -1.43 0.00
 13 15 5 0.40 0.00
 13 15 6 0.79 0.00
 13 15 7 2.87 0.00
 13 15 8 4.68 0.00
 13 15 9 -1.24 0.00
 13 15 10 -0.32 0.00
 13 15 11 -0.92 0.00
 13 15 12 2.06 0.00
 13 15 13 2.38 0.00
 13 15 14 3.66 0.00
 13 15 15 -0.33 0.00
 13 15 16 0.89 0.00
 13 17 0 4.35 0.00
 13 17 1 -1.94 0.00
 13 17 2 0.39 0.00
 13 17 3 1.06 0.00
 13 17 4 3.19 0.00
 13 17 5 -5.03 0.00
 13 17 6 -3.33 0.00
 13 17 7 -1.69 0.00
 13 17 8 4.92 0.00
 13 17 9 2.96 0.00
 13 17 10 -0.79 0.00
 13 17 11 2.98 0.00
 13 17 12 -0.41 0.00
 13 17 13 -0.16 0.00
 13 17 14 -1.22 0.00
 13 17 15 -1.21 0.00
 13 19 0 -3.74 0.00
 13 19 1 2.13 0.00
 13 19 2 1.21 0.00
 13 19 3 0.71 0.00
 13 19 4 0.98 0.00
 13 19 5 -10.39 0.00
 13 19 6 -3.40 0.00
 13 19 7 -3.36 0.00
 13 19 8 -2.62 0.00
 13 19 9 2.19 0.00
 13 19 10 -1.73 0.00
 13 19 11 -1.01 0.00
 13 19 12 -1.30 0.00
 13 19 13 4.86 0.00
 13 19 14 -2.93 0.00
 13 19 15 -1.21 0.00
 13 21 0 -0.19 0.00
 13 21 1 -0.20 0.00
 13 21 2 2.49 0.00
 13 21 3 -1.69 0.00
 13 21 4 0.91 0.00
 13 21 5 -2.47 0.00
 13 21 6 -3.44 0.00
 13 21 7 1.28 0.00
 13 21 8 1.46 0.00
 13 21 9 0.20 0.00
 13 21 10 0.12 0.00
 13 21 11 -2.50 0.00
 13 21 12 2.27 0.00
 13 21 13 0.35 0.00
 13 21 14 0.26 0.00
 13 23 0 1.97 0.00
 13 23 1 -4.03 0.00
 13 23 2 2.95 0.00
 13 23 3 -2.62 0.00
 13 23 4 3.10 0.00
 13 23 5 1.00 0.00
 13 23 6 1.46 0.00
 13 23 7 0.13 0.00
 13 23 8 1.92 0.00
 13 23 9 -1.60 0.00
 13 23 10 3.45 0.00
 13 23 11 0.35 0.00
 13 23 12 2.57 0.00
 13 23 13 1.73 0.00
 13 23 14 1.36 0.00
 13 25 0 0.24 0.00
 13 25 1 -1.91 0.00
 13 25 2 1.56 0.00
 13 25 3 1.76 0.00
 13 25 4 -1.99 0.00
 13 25 5 4.19 0.00
 13 25 6 -1.07 0.00
 13 25 7 0.67 0.00
 13 25 8 -2.11 0.00
 13 25 9 -1.15 0.00
 13 25 10 -2.41 0.00
 13 25 11 -4.88 0.00
 13 25 12 0.45 0.00
 13 25 13 -4.36 0.00
 13 27 0 -0.54 0.00
 13 27 1 1.26 0.00
 13 27 2 -2.84 0.00
 13 27 3 0.51 0.00
 13 27 4 -0.45 0.00
 13 27 5 4.83 0.00
 13 27 6 -0.16 0.00
 13 27 7 -0.19 0.00
 13 27 8 -5.02 0.00
 13 27 9 -0.25 0.00
 13 27 10 0.54 0.00
 13 27 11 -4.23 0.00
 13 27 12 0.00 0.00
 13 29 0 1.05 0.00
 13 29 1 1.00 0.00
 13 29 2 -3.31 0.00
 13 29 3 2.62 0.00
 13 29 4 -3.22 0.00
 13 29 5 5.35 0.00
 13 29 6 2.08 0.00
 13 29 7 -1.14 0.00
 13 29 8 4.93 0.00
 13 29 9 -3.71 0.00
 13 29 10 3.93 0.00
 13 29 11 0.20 0.00
 13 31 0 3.36 0.00
 13 31 1 -2.16 0.00
 13 31 2 0.84 0.00
 13 31 3 0.10 0.00
 13 31 4 5.10 0.00
 13 31 5 -3.94 0.00
 13 31 6 4.00 0.00
 13 31 7 -2.97 0.00
 13 31 8 5.74 0.00
 13 31 9 2.81 0.00
 13 31 10 2.99 0.00
 13 33 0 -0.22 0.00
 13 33 1 -0.20 0.00
 13 33 2 -4.11 0.00
 13 33 3 3.20 0.00
 13 33 4 5.23 0.00
 13 33 5 0.83 0.00
 13 33 6 1.31 0.00
 13 33 7 -1.76 0.00
 13 33 8 1.71 0.00
 13 33 9 0.15 0.00
 13 35 0 1.79 0.00
 13 35 1 -5.61 0.00
 13 35 2 0.57 0.00
 13 35 3 -0.39 0.00
 13 35 4 4.35 0.00
 13 35 5 -2.40 0.00
 13 35 6 -2.08 0.00
 13 35 7 2.15 0.00
 13 35 8 -4.09 0.00
 13 37 0 0.92 0.00
 13 37 1 -1.67 0.00
 13 37 2 -2.12 0.00
 13 37 3 -1.02 0.00
 13 37 4 5.78 0.00
 13 37 5 -1.58 0.00
 13 37 6 2.47 0.00
 13 37 7 3.12 0.00
 13 39 0 -2.41 0.00
 13 39 1 -1.16 0.00
 13 39 2 -2.26 0.00
 13 39 3 1.60 0.00
 13 39 4 1.29 0.00
 13 39 5 -3.31 0.00
 14 0 0 16.73 0.00
 14 0 1 8.53 0.00
 14 0 2 10.14 0.00
 14 0 3 -2.45 0.00
 14 0 4 -2.54 0.00
 14 0 5 -1.78 0.00
 14 0 6 3.61 0.00
 14 0 7 -3.13 0.00
 14 0 8 1.21 0.00
 14 0 9 2.05 0.00
 14 0 11 -0.16 0.00
 14 0 12 1.86 0.00
 14 0 13 7.89 0.00
 14 0 14 -2.90 0.00
 14 0 15 0.64 0.00
 14 0 16 -0.01 0.00
 14 2 0 0.65 0.00
 14 2 1 4.07 0.00
 14 2 2 0.32 0.00
 14 2 3 -1.68 0.00
 14 2 4 -6.82 0.00
 14 2 5 -4.69 0.00
 14 2 6 -2.34 0.00
 14 2 7 -5.70 0.00
 14 2 8 0.74 0.00
 14 2 9 0.93 0.00
 14 2 10 3.46 0.00
 14 2 11 -1.47 0.00
 14 2 12 -6.22 0.00
 14 2 13 4.23 0.00
 14 2 14 -4.73 0.00
 14 2 15 0.69 0.00
 14 2 16 1.34 0.00
 14 4 0 10.90 0.00
 14 4 1 -1.78 0.00
 14 4 2 6.28 0.00
 14 4 3 3.00 0.00
 14 4 4 -1.63 0.00
 14 4 5 0.77 0.00
 14 4 6 -0.33 0.00
 14 4 7 -3.56 0.00
 14 4 8 -3.19 0.00
 14 4 9 0.12 0.00
 14 4 10 3.34 0.00
 14 4 11 -4.51 0.00
 14 4 12 -1.99 0.00
 14 4 13 -3.00 0.00
 14 4 14 -0.90 0.00
 14 4 15 -1.92 0.00
 14 4 16 1.05 0.00
 14 6 0 -6.76 0.00
 14 6 1 -3.81 0.00
 14 6 2 1.14 0.00
 14 6 3 2.60 0.00
 14 6 4 -6.80 0.00
 14 6 5 2.37 0.00
 14 6 6 -3.40 0.00
 14 6 7 -1.11 0.00
 14 6 8 -1.26 0.00
 14 6 9 -4.70 0.00
 14 6 10 -2.70 0.00
 14 6 11 -4.74 0.00
 14 6 12 -0.91 0.00
 14 6 13 -0.94 0.00
 14 6 14 3.95 0.00
 14 6 15 -2.74 0.00
 14 6 16 2.69 0.00
 14 8 0 8.58 0.00
 14 8 1 -0.95 0.00
 14 8 2 0.91 0.00
 14 8 3 -2.78 0.00
 14 8 4 -4.36 0.00
 14 8 5 0.68 0.00
 14 8 6 0.98 0.00
 14 8 7 -3.82 0.00
 14 8 8 -0.66 0.00
 14 8 9 -7.55 0.00
 14 8 10 4.17 0.00
 14 8 11 -0.49 0.00
 14 8 12 2.41 0.00
 14 8 13 0.77 0.00
 14 8 14 3.54 0.00
 14 8 15 -2.28 0.00
 14 8 16 -0.03 0.00
 14 10 0 -6.04 0.00
 14 10 1 -0.73 0.00
 14 10 2 4.61 0.00
 14 10 3 0.85 0.00
 14 10 4 -0.18 0.00
 14 10 5 -0.54 0.00
 14 10 6 2.40 0.00
 14 10 7 -7.83 0.00
 14 10 8 4.75 0.00
 14 10 9 -5.59 0.00
 14 10 10 7.32 0.00
 14 10 11 -3.60 0.00
 14 10 12 5.41 0.00
 14 10 13 0.51 0.00
 14 10 14 2.51 0.00
 14 10 15 2.83 0.00
 14 10 16 0.56 0.00
 14 12 0 3.94 0.00
 14 12 1 -1.34 0.00
 14 12 2 -3.86 0.00
 14 12 3 -1.89 0.00
 14 12 4 -0.14 0.00
 14 12 5 -4.72 0.00
 14 12 6 -6.73 0.00
 14 12 7 -7.02 0.00
 14 12 8 -0.09 0.00
 14 12 9 -0.98 0.00
 14 12 10 3.46 0.00
 14 12 11 -1.25 0.00
 14 12 12 -4.32 0.00
 14 12 13 -3.40 0.00
 14 12 14 0.23 0.00
 14 12 15 4.91 0.00
 14 12 16 4.11 0.00
 14 14 0 -6.93 0.00
 14 14 1 4.90 0.00
 14 14 2 -3.25 0.00
 14 14 3 6.87 0.00
 14 14 4 3.90 0.00
 14 14 5 5.05 0.00
 14 14 6 -4.46 0.00
 14 14 7 3.01 0.00
 14 14 8 -2.32 0.00
 14 14 9 4.67 0.00
 14 14 10 -4.88 0.00
 14 14 11 1.65 0.00
 14 14 12 1.37 0.00
 14 14 13 4.77 0.00
 14 14 14 -4.16 0.00
 14 14 15 8.30 0.00
 14 16 0 6.67 0.00
 14 16 1 -5.12 0.00
 14 16 2 -3.01 0.00
 14 16 3 1.96 0.00
 14 16 4 8.23 0.00
 14 16 5 3.48 0.00
 14 16 6 -5.37 0.00
 14 16 7 7.79 0.00
 14 16 8 4.58 0.00
 14 16 9 2.62 0.00
 14 16 10 -1.00 0.00
 14 16 11 -1.05 0.00
 14 16 12 -2.57 0.00
 14 16 13 -3.20 0.00
 14 16 14 4.11 0.00
 14 16 15 -1.74 0.00
 14 18 0 -5.84 0.00
 14 18 1 -1.88 0.00
 14 18 2 -3.14 0.00
 14 18 3 -1.10 0.00
 14 18 4 3.55 0.00
 14 18 5 2.50 0.00
 14 18 6 -4.79 0.00
 14 18 7 1.16 0.00
 14 18 8 2.12 0.00
 14 18 9 1.22 0.00
 14 18 10 -4.11 0.00
 14 18 11 5.74 0.00
 14 18 12 -3.76 0.00
 14 18 13 2.64 0.00
 14 18 14 2.53 0.00
 14 20 0 -1.60 0.00
 14 20 1 -6.97 0.00
 14 20 2 -7.91 0.00
 14 20 3 3.66 0.00
 14 20 4 -0.70 0.00
 14 20 5 -0.79 0.00
 14 20 6 -9.10 0.00
 14 20 7 3.94 0.00
 14 20 8 -2.11 0.00
 14 20 9 5.43 0.00
 14 20 10 -5.41 0.00
 14 20 11 1.45 0.00
 14 20 12 -3.39 0.00
 14 20 13 -1.82 0.00
 14 20 14 3.10 0.00
 14 22 0 -2.91 0.00
 14 22 1 -1.61 0.00
 14 22 2 -2.44 0.00
 14 22 3 -7.54 0.00
 14 22 4 4.49 0.00
 14 22 5 1.38 0.00
 14 22 6 6.88 0.00
 14 22 7 0.30 0.00
 14 22 8 0.24 0.00
 14 22 9 -1.71 0.00
 14 22 10 -1.49 0.00
 14 22 11 1.07 0.00
 14 22 12 0.19 0.00
 14 22 13 1.21 0.00
 14 24 0 1.79 0.00
 14 24 1 -1.55 0.00
 14 24 2 -2.33 0.00
 14 24 3 2.39 0.00
 14 24 4 4.13 0.00
 14 24 5 -0.30 0.00
 14 24 6 -2.78 0.00
 14 24 7 0.36 0.00
 14 24 8 1.49 0.00
 14 24 9 0.05 0.00
 14 24 10 3.89 0.00
 14 24 11 -0.11 0.00
 14 24 12 0.03 0.00
 14 26 0 -3.42 0.00
 14 26 1 -0.44 0.00
 14 26 2 -1.67 0.00
 14 26 3 -5.01 0.00
 14 26 4 -0.76 0.00
 14 26 5 3.82 0.00
 14 26 6 3.04 0.00
 14 26 7 2.67 0.00
 14 26 8 -5.51 0.00
 14 26 9 0.31 0.00
 14 26 10 -0.17 0.00
 14 26 11 -4.85 0.00
 14 28 0 -0.17 0.00
 14 28 1 0.10 0.00
 14 28 2 -3.50 0.00
 14 28 3 -1.10 0.00
 14 28 4 2.90 0.00
 14 28 5 2.10 0.00
 14 28 6 0.21 0.00
 14 28 7 2.24 0.00
 14 28 8 -2.36 0.00
 14 28 9 2.25 0.00
 14 28 10 2.00 0.00
 14 28 11 -4.00 0.00
 14 30 0 0.04 0.00
 14 30 1 0.26 0.00
 14 30 2 6.33 0.00
 14 30 3 -3.42 0.00
 14 30 4 6.22 0.00
 14 30 5 -5.74 0.00
 14 30 6 6.17 0.00
 14 30 7 -0.71 0.00
 14 30 8 -1.24 0.00
 14 30 9 6.04 0.00
 14 30 10 1.15 0.00
 14 32 0 -5.96 0.00
 14 32 1 5.25 0.00
 14 32 2 -2.21 0.00
 14 32 3 2.28 0.00
 14 32 4 6.15 0.00
 14 32 5 -2.29 0.00
 14 32 6 -0.25 0.00
 14 32 7 0.02 0.00
 14 32 8 -2.88 0.00
 14 32 9 0.83 0.00
 14 34 0 -5.66 0.00
 14 34 1 1.05 0.00
 14 34 2 -0.79 0.00
 14 34 3 6.97 0.00
 14 34 4 -0.44 0.00
 14 34 5 2.38 0.00
 14 34 6 -0.91 0.00
 14 34 7 0.43 0.00
 14 34 8 2.15 0.00
 14 36 0 2.63 0.00
 14 36 1 -0.83 0.00
 14 36 2 0.22 0.00
 14 36 3 3.94 0.00
 14 36 4 -0.76 0.00
 14 36 5 4.56 0.00
 14 36 6 -3.68 0.00
 14 36 7 6.32 0.00
 14 38 0 -4.36 0.00
 14 38 1 3.01 0.00
 14 38 2 -4.28 0.00
 14 38 3 2.40 0.00
 14 38 4 -2.81 0.00
 14 38 5 2.04 0.00
 15 1 0 -5.15 0.00
 15 1 1 -8.08 0.00
 15 1 2 -0.23 0.00
 15 1 3 2.58 0.00
 15 1 4 -2.22 0.00
 15 1 5 5.07 0.00
 15 1 6 1.44 0.00
 15 1 7 -1.34 0.00
 15 1 8 -2.19 0.00
 15 1 10 2.47 0.00
 15 1 11 9.33 0.00
 15 1 12 -3.38 0.00
 15 1 13 -2.25 0.00
 15 1 14 2.98 0.00
 15 1 15 1.00 0.00
 15 3 0 -12.17 0.00
 15 3 1 -5.88 0.00
 15 3 2 -2.60 0.00
 15 3 3 4.31 0.00
 15 3 4 -1.84 0.00
 15 3 5 4.19 0.00
 15 3 6 -5.11 0.00
 15 3 7 -5.39 0.00
 15 3 8 -4.14 0.00
 15 3 9 3.87 0.00
 15 3 10 1.78 0.00
 15 3 11 3.48 0.00
 15 3 12 -7.15 0.00
 15 3 13 -5.15 0.00
 15 3 14 0.55 0.00
 15 3 15 1.25 0.00
 15 5 0 -8.27 0.00
 15 5 1 -6.00 0.00
 15 5 2 3.06 0.00
 15 5 3 5.23 0.00
 15 5 4 1.33 0.00
 15 5 5 6.67 0.00
 15 5 6 -2.98 0.00
 15 5 7 0.18 0.00
 15 5 8 -5.46 0.00
 15 5 9 -1.14 0.00
 15 5 10 -2.11 0.00
 15 5 11 -3.39 0.00
 15 5 12 -0.78 0.00
 15 5 13 -0.82 0.00
 15 5 14 6.81 0.00
 15 5 15 1.51 0.00
 15 7 0 -4.53 0.00
 15 7 1 -1.67 0.00
 15 7 2 4.65 0.00
 15 7 3 -1.24 0.00
 15 7 4 2.56 0.00
 15 7 5 0.93 0.00
 15 7 6 -0.34 0.00
 15 7 7 -5.26 0.00
 15 7 8 -5.93 0.00
 15 7 9 -4.88 0.00
 15 7 10 -1.53 0.00
 15 7 11 -3.00 0.00
 15 7 12 -0.39 0.00
 15 7 13 -2.48 0.00
 15 7 14 5.76 0.00
 15 7 15 -3.03 0.00
 15 9 0 3.66 0.00
 15 9 1 -3.77 0.00
 15 9 2 3.85 0.00
 15 9 3 -4.04 0.00
 15 9 4 3.59 0.00
 15 9 5 -1.57 0.00
 15 9 6 6.41 0.00
 15 9 7 -3.03 0.00
 15 9 8 -3.20 0.00
 15 9 9 2.17 0.00
 15 9 10 -0.02 0.00
 15 9 11 0.26 0.00
 15 9 12 -2.65 0.00
 15 9 13 -0.82 0.00
 15 9 14 -1.51 0.00
 15 9 15 1.45 0.00
 15 11 0 -0.84 0.00
 15 11 1 -2.32 0.00
 15 11 2 2.36 0.00
 15 11 3 -4.79 0.00
 15 11 4 0.84 0.00
 15 11 5 -3.54 0.00
 15 11 6 -0.81 0.00
 15 11 7 -4.89 0.00
 15 11 8 -2.19 0.00
 15 11 9 3.38 0.00
 15 11 10 5.55 0.00
 15 11 11 -1.87 0.00
 15 11 12 -4.10 0.00
 15 11 13 -5.46 0.00
 15 11 14 1.19 0.00
 15 11 15 1.21 0.00
 15 13 0 2.27 0.00
 15 13 1 5.24 0.00
 15 13 2 -3.93 0.00
 15 13 3 0.10 0.00
 15 13 4 -0.27 0.00
 15 13 5 -2.01 0.00
 15 13 6 -3.60 0.00
 15 13 7 -2.12 0.00
 15 13 8 2.81 0.00
 15 13 9 3.61 0.00
 15 13 10 4.06 0.00
 15 13 11 4.00 0.00
 15 13 12 -2.34 0.00
 15 13 13 -5.34 0.00
 15 13 14 -1.21 0.00
 15 13 15 2.48 0.00
 15 15 0 4.21 0.00
 15 15 1 -2.97 0.00
 15 15 2 -5.19 0.00
 15 15 3 0.85 0.00
 15 15 4 -0.16 0.00
 15 15 5 0.59 0.00
 15 15 6 -0.96 0.00
 15 15 7 1.86 0.00
 15 15 8 -5.06 0.00
 15 15 9 -0.21 0.00
 15 15 10 0.71 0.00
 15 15 11 -5.63 0.00
 15 15 12 6.88 0.00
 15 15 13 -2.99 0.00
 15 15 14 3.41 0.00
 15 17 0 2.04 0.00
 15 17 1 1.60 0.00
 15 17 2 -4.30 0.00
 15 17 3 1.61 0.00
 15 17 4 2.05 0.00
 15 17 5 -0.80 0.00
 15 17 6 -2.91 0.00
 15 17 7 -0.19 0.00
 15 17 8 1.15 0.00
 15 17 9 -1.82 0.00
 15 17 10 0.78 0.00
 15 17 11 -2.91 0.00
 15 17 12 2.16 0.00
 15 17 13 -5.08 0.00
 15 17 14 -3.61 0.00
 15 19 0 0.15 0.00
 15 19 1 0.20 0.00
 15 19 2 -7.41 0.00
 15 19 3 5.95 0.00
 15 19 4 -0.70 0.00
 15 19 5 3.57 0.00
 15 19 6 -1.12 0.00
 15 19 7 4.99 0.00
 15 19 8 -3.65 0.00
 15 19 9 1.53 0.00
 15 19 10 1.24 0.00
 15 19 11 -4.02 0.00
 15 19 12 -1.07 0.00
 15 19 13 1.95 0.00
 15 21 0 3.68 0.00
 15 21 1 -3.69 0.00
 15 21 2 -0.20 0.00
 15 21 3 0.95 0.00
 15 21 4 -1.90 0.00
 15 21 5 9.32 0.00
 15 21 6 -2.71 0.00
 15 21 7 7.44 0.00
 15 21 8 0.21 0.00
 15 21 9 -1.37 0.00
 15 21 10 -2.91 0.00
 15 21 11 -1.24 0.00
 15 21 12 -1.27 0.00
 15 21 13 -1.54 0.00
 15 23 0 4.09 0.00
 15 23 1 -0.77 0.00
 15 23 2 -1.76 0.00
 15 23 3 -0.29 0.00
 15 23 4 1.97 0.00
 15 23 5 1.98 0.00
 15 23 6 3.44 0.00
 15 23 7 -4.20 0.00
 15 23 8 2.84 0.00
 15 23 9 -2.61 0.00
 15 23 10 0.84 0.00
 15 23 11 3.00 0.00
 15 23 12 3.31 0.00
 15 25 0 -0.15 0.00
 15 25 1 -1.91 0.00
 15 25 2 1.48 0.00
 15 25 3 -6.44 0.00
 15 25 4 0.50 0.00
 15 25 5 -4.59 0.00
 15 25 6 6.58 0.00
 15 25 7 -6.29 0.00
 15 25 8 4.85 0.00
 15 25 9 -0.97 0.00
 15 25 10 -2.11 0.00
 15 25 11 -0.58 0.00
 15 27 0 -1.45 0.00
 15 27 1 -2.97 0.00
 15 27 2 0.43 0.00
 15 27 3 -9.50 0.00
 15 27 4 3.38 0.00
 15 27 5 -4.84 0.00
 15 27 6 7.81 0.00
 15 27 7 -5.58 0.00
 15 27 8 2.08 0.00
 15 27 9 1.48 0.00
 15 27 10 -0.10 0.00
 15 29 0 2.49 0.00
 15 29 1 -3.68 0.00
 15 29 2 3.05 0.00
 15 29 3 -5.09 0.00
 15 29 4 -1.99 0.00
 15 29 5 2.74 0.00
 15 29 6 3.41 0.00
 15 29 7 -0.78 0.00
 15 29 8 6.02 0.00
 15 29 9 -0.24 0.00
 15 31 0 0.62 0.00
 15 31 1 -0.81 0.00
 15 31 2 2.91 0.00
 15 31 3 3.55 0.00
 15 31 4 -5.68 0.00
 15 31 5 3.84 0.00
 15 31 6 -6.18 0.00
 15 31 7 2.83 0.00
 15 31 8 -1.80 0.00
 15 31 9 2.62 0.00
 15 33 0 -4.98 0.00
 15 33 1 4.10 0.00
 15 33 2 -2.69 0.00
 15 33 3 3.79 0.00
 15 33 4 -2.82 0.00
 15 33 5 4.32 0.00
 15 33 6 -1.62 0.00
 15 33 7 0.25 0.00
 15 35 0 -2.98 0.00
 15 35 1 -0.55 0.00
 15 35 2 1.15 0.00
 15 35 3 0.16 0.00
 15 35 4 -3.19 0.00
 15 35 5 -2.68 0.00
 15 35 6 -0.52 0.00
 15 37 0 -1.09 0.00
 15 37 1 8.90 0.00
 15 37 2 -4.46 0.00
 15 37 3 -2.39 0.00
 15 37 4 -5.88 0.00
 16 0 0 -3.28 0.00
 16 0 1 -2.67 0.00
 16 0 2 5.86 0.00
 16 0 3 0.10 0.00
 16 0 4 3.43 0.00
 16 0 10 6.20 0.00
 16 0 11 -0.19 0.00
 16 0 12 3.34 0.00
 16 0 13 -3.91 0.00
 16 0 14 1.23 0.00
 16 2 0 -5.11 0.00
 16 2 1 -3.06 0.00
 16 2 2 -6.76 0.00
 16 2 3 -0.24 0.00
 16 2 4 -1.39 0.00
 16 2 5 2.03 0.00
 16 2 6 0.37 0.00
 16 2 9 1.66 0.00
 16 2 10 3.43 0.00
 16 2 11 -0.76 0.00
 16 2 12 -7.36 0.00
 16 2 13 -7.00 0.00
 16 2 14 -4.54 0.00
 16 4 0 -4.49 0.00
 16 4 1 -0.43 0.00
 16 4 2 1.94 0.00
 16 4 3 4.80 0.00
 16 4 4 4.50 0.00
 16 4 5 -3.91 0.00
 16 4 6 -3.15 0.00
 16 4 7 -8.55 0.00
 16 4 8 -5.75 0.00
 16 4 9 -2.43 0.00
 16 4 10 1.71 0.00
 16 4 11 -0.56 0.00
 16 4 12 1.41 0.00
 16 4 13 1.88 0.00
 16 4 14 -2.32 0.00
 16 6 0 -5.82 0.00
 16 6 1 2.01 0.00
 16 6 2 -0.47 0.00
 16 6 3 4.99 0.00
 16 6 4 -1.74 0.00
 16 6 5 -1.80 0.00
 16 6 6 0.17 0.00
 16 6 7 -3.76 0.00
 16 6 8 -1.60 0.00
 16 6 9 -2.25 0.00
 16 6 10 -2.67 0.00
 16 6 11 2.69 0.00
 16 6 12 -1.79 0.00
 16 6 13 4.77 0.00
 16 6 14 -4.68 0.00
 16 8 0 2.38 0.00
 16 8 1 -1.67 0.00
 16 8 2 4.50 0.00
 16 8 3 -1.86 0.00
 16 8 4 3.09 0.00
 16 8 5 -2.66 0.00
 16 8 6 1.96 0.00
 16 8 7 -8.77 0.00
 16 8 8 -4.30 0.00
 16 8 9 -3.49 0.00
 16 8 10 1.72 0.00
 16 8 11 5.57 0.00
 16 8 12 -0.96 0.00
 16 8 13 3.04 0.00
 16 8 14 -1.66 0.00
 16 10 0 -2.27 0.00
 16 10 1 -2.03 0.00
 16 10 2 5.99 0.00
 16 10 3 -1.20 0.00
 16 10 4 -3.82 0.00
 16 10 5 3.74 0.00
 16 10 6 1.11 0.00
 16 10 7 -3.95 0.00
 16 10 8 -2.91 0.00
 16 10 9 0.79 0.00
 16 10 10 2.88 0.00
 16 10 11 -3.97 0.00
 16 10 12 -0.71 0.00
 16 10 13 -3.88 0.00
 16 10 14 0.04 0.00
 16 12 0 1.30 0.00
 16 12 1 -0.75 0.00
 16 12 2 -0.54 0.00
 16 12 3 -0.84 0.00
 16 12 4 -0.81 0.00
 16 12 5 -2.57 0.00
 16 12 6 2.94 0.00
 16 12 7 -3.92 0.00
 16 12 8 3.67 0.00
 16 12 9 -1.74 0.00
 16 12 10 3.83 0.00
 16 12 11 0.09 0.00
 16 12 12 -5.57 0.00
 16 12 13 -7.22 0.00
 16 12 14 3.38 0.00
 16 14 0 -0.90 0.00
 16 14 1 -1.65 0.00
 16 14 2 0.48 0.00
 16 14 3 -4.06 0.00
 16 14 4 -4.91 0.00
 16 14 5 -0.58 0.00
 16 14 6 1.55 0.00
 16 14 7 0.01 0.00
 16 14 8 -4.13 0.00
 16 14 9 -0.57 0.00
 16 14 10 -3.27 0.00
 16 14 11 3.21 0.00
 16 14 12 -2.40 0.00
 16 14 13 0.91 0.00
 16 14 14 -4.38 0.00
 16 16 0 6.04 0.00
 16 16 1 -8.20 0.00
 16 16 2 -0.91 0.00
 16 16 3 -1.69 0.00
 16 16 4 -2.45 0.00
 16 16 5 -2.58 0.00
 16 16 6 -0.47 0.00
 16 16 7 2.74 0.00
 16 16 8 2.95 0.00
 16 16 9 -5.88 0.00
 16 16 10 -1.19 0.00
 16 16 11 0.87 0.00
 16 16 12 -8.85 0.00
 16 16 13 -6.25 0.00
 16 18 0 -0.06 0.00
 16 18 1 9.97 0.00
 16 18 2 4.63 0.00
 16 18 3 0.11 0.00
 16 18 4 -1.54 0.00
 16 18 5 -2.97 0.00
 16 18 6 5.48 0.00
 16 18 7 -5.05 0.00
 16 18 8 5.74 0.00
 16 18 9 -6.16 0.00
 16 18 10 6.14 0.00
 16 18 11 3.32 0.00
 16 18 12 0.20 0.00
 16 18 13 -3.88 0.00
 16 20 0 4.61 0.00
 16 20 1 -0.90 0.00
 16 20 2 1.92 0.00
 16 20 3 3.81 0.00
 16 20 4 -5.24 0.00
 16 20 5 -2.26 0.00
 16 20 6 -4.38 0.00
 16 20 7 2.00 0.00
 16 20 8 0.00 0.00
 16 20 9 1.21 0.00
 16 20 10 1.57 0.00
 16 20 11 -3.45 0.00
 16 20 12 3.47 0.00
 16 22 0 -3.58 0.00
 16 22 1 4.70 0.00
 16 22 2 4.12 0.00
 16 22 3 -3.73 0.00
 16 22 4 0.71 0.00
 16 22 5 0.93 0.00
 16 22 6 5.41 0.00
 16 22 7 -2.00 0.00
 16 22 8 -2.41 0.00
 16 22 9 -2.79 0.00
 16 22 10 -2.45 0.00
 16 22 11 -0.12 0.00
 16 24 0 -0.78 0.00
 16 24 1 1.90 0.00
 16 24 2 -0.02 0.00
 16 24 3 0.87 0.00
 16 24 4 -3.15 0.00
 16 24 5 -1.50 0.00
 16 24 6 -5.35 0.00
 16 24 7 -4.57 0.00
 16 24 8 1.36 0.00
 16 24 9 -1.56 0.00
 16 24 10 -1.17 0.00
 16 24 11 -1.84 0.00
 16 26 0 -2.63 0.00
 16 26 1 1.78 0.00
 16 26 2 0.65 0.00
 16 26 3 -2.18 0.00
 16 26 4 -5.75 0.00
 16 26 5 3.64 0.00
 16 26 6 3.16 0.00
 16 26 7 -1.18 0.00
 16 26 8 0.94 0.00
 16 26 9 -1.45 0.00
 16 26 10 -3.31 0.00
 16 28 0 2.27 0.00
 16 28 1 0.14 0.00
 16 28 2 -3.84 0.00
 16 28 3 -2.50 0.00
 16 28 4 -5.10 0.00
 16 28 5 4.92 0.00
 16 28 6 -0.25 0.00
 16 28 7 2.33 0.00
 16 28 8 1.47 0.00
 16 28 9 3.72 0.00
 16 30 0 1.02 0.00
 16 30 1 -1.54 0.00
 16 30 2 1.26 0.00
 16 30 3 -1.43 0.00
 16 30 4 -5.16 0.00
 16 30 5 0.40 0.00
 16 30 6 -1.89 0.00
 16 30 7 4.36 0.00
 16 30 8 -1.71 0.00
 16 32 0 1.16 0.00
 16 32 1 1.67 0.00
 16 32 2 -3.53 0.00
 16 32 3 1.61 0.00
 16 32 4 -1.13 0.00
 16 32 5 5.33 0.00
 16 32 6 -0.32 0.00
 16 32 7 8.72 0.00
 16 34 0 3.80 0.00
 16 34 1 -6.21 0.00
 16 34 2 3.73 0.00
 16 34 3 -1.16 0.00
 16 34 4 0.88 0.00
 16 34 5 -3.33 0.00
 17 1 8 2.60 0.00
 17 1 9 1.14 0.00
 17 1 10 1.59 0.00
 17 1 11 -4.11 0.00
 17 1 12 2.27 0.00
 17 1 13 -5.13 0.00
 17 3 0 4.87 0.00
 17 3 1 6.78 0.00
 17 3 2 -3.14 0.00
 17 3 3 -6.34 0.00
 17 3 4 -0.80 0.00
 17 3 7 -5.00 0.00
 17 3 8 1.17 0.00
 17 3 9 -5.86 0.00
 17 3 10 -0.58 0.00
 17 3 11 -3.05 0.00
 17 3 12 -3.04 0.00
 17 3 13 -4.02 0.00
 17 3 14 3.29 0.00
 17 5 0 -3.05 0.00
 17 5 1 4.53 0.00
 17 5 2 2.02 0.00
 17 5 3 -2.30 0.00
 17 5 4 2.51 0.00
 17 5 5 -3.99 0.00
 17 5 6 -1.14 0.00
 17 5 7 0.63 0.00
 17 5 8 0.76 0.00
 17 5 9 -0.81 0.00
 17 5 10 -2.21 0.00
 17 5 11 -1.13 0.00
 17 5 12 0.79 0.00
 17 5 13 2.35 0.00
 17 5 14 1.03 0.00
 17 7 0 0.13 0.00
 17 7 1 0.55 0.00
 17 7 2 2.93 0.00
 17 7 3 -0.56 0.00
 17 7 4 5.91 0.00
 17 7 5 -4.65 0.00
 17 7 6 -0.14 0.00
 17 7 7 -3.59 0.00
 17 7 8 -0.66 0.00
 17 7 9 0.71 0.00
 17 7 10 1.73 0.00
 17 7 11 5.39 0.00
 17 7 12 1.73 0.00
 17 7 13 1.57 0.00
 17 7 14 -0.29 0.00
 17 9 0 -1.49 0.00
 17 9 1 3.47 0.00
 17 9 2 3.11 0.00
 17 9 3 3.77 0.00
 17 9 4 -0.58 0.00
 17 9 5 4.02 0.00
 17 9 6 -3.51 0.00
 17 9 7 0.46 0.00
 17 9 8 -6.54 0.00
 17 9 9 6.82 0.00
 17 9 10 0.95 0.00
 17 9 11 2.02 0.00
 17 9 12 2.28 0.00
 17 9 13 2.68 0.00
 17 11 0 -3.74 0.00
 17 11 1 1.17 0.00
 17 11 2 -0.94 0.00
 17 11 3 2.15 0.00
 17 11 4 -1.98 0.00
 17 11 5 -2.49 0.00
 17 11 6 -6.64 0.00
 17 11 7 -4.36 0.00
 17 11 8 -9.22 0.00
 17 11 9 0.08 0.00
 17 11 10 1.09 0.00
 17 11 11 -0.38 0.00
 17 11 12 1.57 0.00
 17 11 13 6.37 0.00
 17 13 0 -6.56 0.00
 17 13 1 1.00 0.00
 17 13 2 -0.17 0.00
 17 13 3 -4.52 0.00
 17 13 4 -0.44 0.00
 17 13 5 -6.61 0.00
 17 13 6 0.10 0.00
 17 13 7 -2.29 0.00
 17 13 8 -1.60 0.00
 17 13 9 -4.59 0.00
 17 13 10 -3.94 0.00
 17 13 11 -2.08 0.00
 17 13 12 -6.46 0.00
 17 13 13 -4.10 0.00
 17 15 0 -0.68 0.00
 17 15 1 -8.03 0.00
 17 15 2 -2.37 0.00
 17 15 3 -0.58 0.00
 17 15 4 -0.07 0.00
 17 15 5 1.39 0.00
 17 15 6 2.05 0.00
 17 15 7 9.45 0.00
 17 15 8 -9.35 0.00
 17 15 9 3.52 0.00
 17 15 10 -6.50 0.00
 17 15 11 -1.90 0.00
 17 15 12 -3.20 0.00
 17 15 13 -2.80 0.00
 17 17 0 -5.56 0.00
 17 17 1 5.38 0.00
 17 17 2 2.52 0.00
 17 17 3 1.76 0.00
 17 17 4 1.92 0.00
 17 17 5 -4.23 0.00
 17 17 6 5.78 0.00
 17 17 7 4.43 0.00
 17 17 8 1.74 0.00
 17 17 9 2.13 0.00
 17 17 10 -1.75 0.00
 17 17 11 2.82 0.00
 17 17 12 -7.18 0.00
 17 19 0 3.25 0.00
 17 19 1 1.79 0.00
 17 19 2 3.76 0.00
 17 19 3 -1.37 0.00
 17 19 4 1.48 0.00
 17 19 5 -11.15 0.00
 17 19 6 4.00 0.00
 17 19 7 -3.61 0.00
 17 19 8 0.64 0.00
 17 19 9 3.47 0.00
 17 19 10 5.65 0.00
 17 19 11 2.20 0.00
 17 19 12 0.49 0.00
 17 21 0 -4.95 0.00
 17 21 1 -1.20 0.00
 17 21 2 2.91 0.00
 17 21 3 -4.02 0.00
 17 21 4 -1.69 0.00
 17 21 5 -9.64 0.00
 17 21 6 0.32 0.00
 17 21 7 -8.14 0.00
 17 21 8 -1.04 0.00
 17 21 9 -3.69 0.00
 17 21 10 -2.79 0.00
 17 21 11 2.57 0.00
 17 23 0 -3.97 0.00
 17 23 1 1.78 0.00
 17 23 2 -0.37 0.00
 17 23 3 0.15 0.00
 17 23 4 -1.14 0.00
 17 23 5 -3.23 0.00
 17 23 6 -4.27 0.00
 17 23 7 -4.96 0.00
 17 23 8 -3.92 0.00
 17 23 9 3.66 0.00
 17 23 10 -3.89 0.00
 17 25 0 -2.78 0.00
 17 25 1 4.85 0.00
 17 25 2 1.07 0.00
 17 25 3 2.35 0.00
 17 25 4 -2.80 0.00
 17 25 5 5.42 0.00
 17 25 6 -1.84 0.00
 17 25 7 5.46 0.00
 17 25 8 -4.25 0.00
 17 25 9 5.33 0.00
 17 27 0 -0.20 0.00
 17 27 1 3.36 0.00
 17 27 2 -0.22 0.00
 17 27 3 -1.65 0.00
 17 27 4 -3.91 0.00
 17 27 5 4.59 0.00
 17 27 6 -3.63 0.00
 17 27 7 2.47 0.00
 17 27 8 -3.56 0.00
 17 29 0 -3.03 0.00
 17 29 1 1.93 0.00
 17 29 2 -5.82 0.00
 17 29 3 -6.37 0.00
 17 29 4 -2.76 0.00
 17 29 5 1.56 0.00
 17 29 6 5.99 0.00
 17 29 7 -0.89 0.00
 17 31 0 -0.40 0.00
 17 31 1 0.25 0.00
 17 31 2 -0.84 0.00
 17 31 3 0.17 0.00
 17 31 4 -0.94 0.00
 17 31 5 0.65 0.00
 17 31 6 0.50 0.00
 17 33 1 1.46 0.00
 17 33 2 6.03 0.00
 17 33 3 -2.02 0.00
 18 0 8 -1.49 0.00
 18 0 9 -1.94 0.00
 18 0 10 1.65 0.00
 18 0 11 4.47 0.00
 18 0 12 2.02 0.00
 18 2 1 2.48 0.00
 18 2 2 4.31 0.00
 18 2 6 3.38 0.00
 18 2 7 -1.85 0.00
 18 2 8 8.19 0.00
 18 2 9 -6.25 0.00
 18 2 10 0.55 0.00
 18 2 11 0.84 0.00
 18 2 12 -7.49 0.00
 18 2 13 -3.07 0.00
 18 4 0 3.11 0.00
 18 4 1 -9.26 0.00
 18 4 2 4.92 0.00
 18 4 3 -6.45 0.00
 18 4 4 1.80 0.00
 18 4 5 -5.41 0.00
 18 4 6 -1.07 0.00
 18 4 7 -2.04 0.00
 18 4 8 0.16 0.00
 18 4 9 -0.76 0.00
 18 4 10 2.32 0.00
 18 4 11 1.04 0.00
 18 4 12 9.31 0.00
 18 4 13 4.91 0.00
 18 6 0 2.23 0.00
 18 6 1 -0.07 0.00
 18 6 2 -2.81 0.00
 18 6 3 4.95 0.00
 18 6 4 1.10 0.00
 18 6 5 4.84 0.00
 18 6 6 -0.15 0.00
 18 6 7 5.27 0.00
 18 6 8 2.79 0.00
 18 6 9 3.07 0.00
 18 6 10 -1.94 0.00
 18 6 11 -2.30 0.00
 18 6 12 -2.13 0.00
 18 6 13 -0.29 0.00
 18 8 0 -5.37 0.00
 18 8 1 6.74 0.00
 18 8 2 -0.11 0.00
 18 8 3 10.71 0.00
 18 8 4 1.78 0.00
 18 8 5 10.48 0.00
 18 8 6 -8.48 0.00
 18 8 7 0.32 0.00
 18 8 8 -4.48 0.00
 18 8 9 1.18 0.00
 18 8 10 0.83 0.00
 18 8 11 1.04 0.00
 18 8 12 2.66 0.00
 18 8 13 4.15 0.00
 18 10 0 -3.52 0.00
 18 10 1 3.49 0.00
 18 10 2 -4.12 0.00
 18 10 3 2.80 0.00
 18 10 4 -8.63 0.00
 18 10 5 7.18 0.00
 18 10 6 -13.55 0.00
 18 10 7 -3.75 0.00
 18 10 8 -5.28 0.00
 18 10 9 4.83 0.00
 18 10 10 -0.09 0.00
 18 10 11 -1.48 0.00
 18 10 12 1.65 0.00
 18 12 0 -1.08 0.00
 18 12 1 0.42 0.00
 18 12 2 -5.89 0.00
 18 12 3 1.70 0.00
 18 12 4 -3.48 0.00
 18 12 5 -0.95 0.00
 18 12 6 -6.22 0.00
 18 12 7 -2.70 0.00
 18 12 8 1.76 0.00
 18 12 9 -1.84 0.00
 18 12 10 -1.70 0.00
 18 12 11 6.33 0.00
 18 12 12 0.32 0.00
 18 14 0 0.87 0.00
 18 14 1 -0.42 0.00
 18 14 2 -6.11 0.00
 18 14 3 -0.57 0.00
 18 14 4 -4.62 0.00
 18 14 5 3.53 0.00
 18 14 6 -4.86 0.00
 18 14 7 2.17 0.00
 18 14 8 -1.27 0.00
 18 14 9 -1.39 0.00
 18 14 10 1.43 0.00
 18 14 11 3.48 0.00
 18 14 12 4.97 0.00
 18 16 0 -1.15 0.00
 18 16 1 -2.59 0.00
 18 16 2 -9.08 0.00
 18 16 3 3.79 0.00
 18 16 4 2.58 0.00
 18 16 5 0.64 0.00
 18 16 6 3.21 0.00
 18 16 7 3.50 0.00
 18 16 8 6.89 0.00
 18 16 9 -11.22 0.00
 18 16 10 1.14 0.00
 18 16 11 -0.68 0.00
 18 18 0 4.91 0.00
 18 18 1 -0.87 0.00
 18 18 2 3.76 0.00
 18 18 3 -4.77 0.00
 18 18 4 6.37 0.00
 18 18 5 -5.42 0.00
 18 18 6 3.35 0.00
 18 18 7 -2.98 0.00
 18 18 8 3.23 0.00
 18 18 9 -7.61 0.00
 18 18 10 7.94 0.00
 18 18 11 1.76 0.00
 18 20 0 2.29 0.00
 18 20 1 -6.63 0.00
 18 20 2 -4.17 0.00
 18 20 3 -2.29 0.00
 18 20 4 -4.59 0.00
 18 20 5 -4.35 0.00
 18 20 6 -9.27 0.00
 18 20 7 0.08 0.00
 18 20 8 -5.96 0.00
 18 20 9 -1.67 0.00
 18 20 10 -1.68 0.00
 18 22 0 -2.34 0.00
 18 22 1 2.99 0.00
 18 22 2 0.52 0.00
 18 22 3 3.98 0.00
 18 22 4 -0.01 0.00
 18 22 5 3.74 0.00
 18 22 6 -3.67 0.00
 18 22 7 0.44 0.00
 18 22 8 -2.93 0.00
 18 22 9 1.45 0.00
 18 24 0 0.38 0.00
 18 24 1 2.58 0.00
 18 24 2 -1.16 0.00
 18 24 3 1.72 0.00
 18 24 4 -3.15 0.00
 18 24 5 3.57 0.00
 18 24 6 -4.99 0.00
 18 24 7 -0.51 0.00
 18 24 8 3.56 0.00
 18 26 0 1.15 0.00
 18 26 1 0.49 0.00
 18 26 2 1.54 0.00
 18 26 3 1.37 0.00
 18 26 4 -3.15 0.00
 18 26 5 3.57 0.00
 18 26 6 2.27 0.00
 18 26 7 1.35 0.00
 18 28 0 1.61 0.00
 18 28 1 -0.15 0.00
 18 28 2 -3.27 0.00
 18 28 3 -7.77 0.00
 18 28 4 -2.38 0.00
 18 28 5 2.47 0.00
 18 28 6 4.14 0.00
 18 30 0 -3.52 0.00
 18 30 1 -1.36 0.00
 18 30 2 -2.31 0.00
 18 30 3 -4.58 0.00
 18 30 4 1.02 0.00
 19 1 0 -3.11 0.00
 19 1 1 -1.36 0.00
 19 1 2 -1.44 0.00
 19 1 5 -1.33 0.00
 19 1 6 2.91 0.00
 19 1 7 -0.92 0.00
 19 1 8 -1.34 0.00
 19 1 9 1.52 0.00
 19 1 10 3.00 0.00
 19 1 11 4.03 0.00
 19 3 0 -1.17 0.00
 19 3 1 -7.70 0.00
 19 3 2 -5.22 0.00
 19 3 3 3.38 0.00
 19 3 4 -4.91 0.00
 19 3 5 3.91 0.00
 19 3 6 -3.87 0.00
 19 3 7 2.14 0.00
 19 3 8 -0.49 0.00
 19 3 9 -0.20 0.00
 19 3 10 5.21 0.00
 19 3 11 5.16 0.00
 19 5 0 -2.71 0.00
 19 5 1 1.50 0.00
 19 5 2 2.23 0.00
 19 5 3 9.12 0.00
 19 5 4 -2.09 0.00
 19 5 5 10.71 0.00
 19 5 6 -3.15 0.00
 19 5 7 0.61 0.00
 19 5 8 0.46 0.00
 19 5 9 1.23 0.00
 19 5 10 1.21 0.00
 19 5 11 3.92 0.00
 19 7 0 5.23 0.00
 19 7 1 -6.07 0.00
 19 7 2 1.66 0.00
 19 7 3 3.36 0.00
 19 7 4 3.96 0.00
 19 7 5 1.73 0.00
 19 7 6 -0.53 0.00
 19 7 7 -6.83 0.00
 19 7 8 2.12 0.00
 19 7 9 -0.39 0.00
 19 7 10 -0.94 0.00
 19 7 11 4.37 0.00
 19 9 0 -2.75 0.00
 19 9 1 -1.63 0.00
 19 9 2 -1.87 0.00
 19 9 3 -1.81 0.00
 19 9 4 -1.50 0.00
 19 9 5 0.54 0.00
 19 9 6 0.04 0.00
 19 9 7 -9.64 0.00
 19 9 8 0.56 0.00
 19 9 9 -1.99 0.00
 19 9 10 -0.78 0.00
 19 9 11 -4.54 0.00
 19 11 0 -0.72 0.00
 19 11 1 -0.49 0.00
 19 11 2 -7.42 0.00
 19 11 3 -7.19 0.00
 19 11 4 3.58 0.00
 19 11 5 -5.17 0.00
 19 11 6 2.85 0.00
 19 11 7 -3.34 0.00
 19 11 8 2.86 0.00
 19 11 9 1.20 0.00
 19 11 10 1.85 0.00
 19 11 11 4.84 0.00
 19 13 0 4.83 0.00
 19 13 1 -1.72 0.00
 19 13 2 -1.16 0.00
 19 13 3 -10.62 0.00
 19 13 4 1.76 0.00
 19 13 5 -3.33 0.00
 19 13 6 1.79 0.00
 19 13 7 4.03 0.00
 19 13 8 2.76 0.00
 19 13 9 -4.46 0.00
 19 13 10 5.56 0.00
 19 13 11 3.24 0.00
 19 15 0 15.54 0.00
 19 15 1 -3.63 0.00
 19 15 2 -0.92 0.00
 19 15 3 -6.14 0.00
 19 15 4 5.61 0.00
 19 15 5 -0.55 0.00
 19 15 6 1.49 0.00
 19 15 7 4.38 0.00
 19 15 8 -2.59 0.00
 19 15 9 -2.55 0.00
 19 15 10 4.04 0.00
 19 17 0 8.69 0.00
 19 17 1 -3.34 0.00
 19 17 2 -1.27 0.00
 19 17 3 -3.69 0.00
 19 17 4 1.27 0.00
 19 17 5 -2.37 0.00
 19 17 6 1.54 0.00
 19 17 7 2.03 0.00
 19 17 8 -4.24 0.00
 19 17 9 -8.17 0.00
 19 17 10 -2.51 0.00
 19 19 0 10.36 0.00
 19 19 1 -4.01 0.00
 19 19 2 -3.98 0.00
 19 19 3 -5.30 0.00
 19 19 4 -5.38 0.00
 19 19 5 -2.33 0.00
 19 19 6 -8.37 0.00
 19 19 7 1.74 0.00
 19 19 8 -5.08 0.00
 19 19 9 -1.56 0.00
 19 21 0 1.60 0.00
 19 21 1 0.77 0.00
 19 21 2 -3.92 0.00
 19 21 3 3.04 0.00
 19 21 4 -0.73 0.00
 19 21 5 1.30 0.00
 19 21 6 -1.25 0.00
 19 21 7 -0.70 0.00
 19 21 8 -1.64 0.00
 19 23 0 7.20 0.00
 19 23 1 1.35 0.00
 19 23 2 5.29 0.00
 19 23 3 -0.22 0.00
 19 23 4 2.09 0.00
 19 23 5 1.62 0.00
 19 23 6 -5.54 0.00
 19 23 7 4.74 0.00
 19 25 0 2.56 0.00
 19 25 1 0.06 0.00
 19 25 2 1.07 0.00
 19 25 3 -2.03 0.00
 19 25 4 2.45 0.00
 19 25 5 -0.21 0.00
 19 25 6 4.02 0.00
 19 27 0 5.18 0.00
 19 27 1 -2.11 0.00
 19 27 2 5.37 0.00
 19 27 3 -4.76 0.00
 19 27 4 -2.78 0.00
 19 27 5 -0.29 0.00
 20 0 0 -28.67 0.00
 20 0 1 1.39 0.00
 20 0 2 -2.80 0.00
 20 0 3 3.33 0.00
 20 0 4 -1.14 0.00
 20 0 5 8.86 0.00
 20 0 6 -3.28 0.00
 20 0 7 9.86 0.00
 20 0 8 -6.49 0.00
 20 0 9 9.51 0.00
 20 0 10 -1.63 0.00
 20 2 0 -1.71 0.00
 20 2 1 -4.22 0.00
 20 2 2 -3.09 0.00
 20 2 3 2.32 0.00
 20 2 4 2.63 0.00
 20 2 5 1.47 0.00
 20 2 6 -0.46 0.00
 20 2 7 3.75 0.00
 20 2 8 -1.76 0.00
 20 2 9 0.94 0.00
 20 2 10 -0.62 0.00
 20 4 0 -10.99 0.00
 20 4 1 2.69 0.00
 20 4 2 4.02 0.00
 20 4 3 -0.80 0.00
 20 4 4 4.43 0.00
 20 4 5 -2.41 0.00
 20 4 6 0.14 0.00
 20 4 7 -0.61 0.00
 20 4 8 -5.31 0.00
 20 4 9 0.15 0.00
 20 4 10 3.76 0.00
 20 6 0 1.76 0.00
 20 6 1 2.50 0.00
 20 6 2 4.23 0.00
 20 6 3 -4.14 0.00
 20 6 4 7.78 0.00
 20 6 5 -7.60 0.00
 20 6 6 0.42 0.00
 20 6 7 -3.55 0.00
 20 6 8 -2.73 0.00
 20 6 9 4.46 0.00
 20 6 10 0.22 0.00
 20 8 0 -3.50 0.00
 20 8 1 -3.75 0.00
 20 8 2 4.92 0.00
 20 8 3 -6.13 0.00
 20 8 4 2.70 0.00
 20 8 5 -0.70 0.00
 20 8 6 -0.09 0.00
 20 8 7 -1.46 0.00
 20 8 8 -3.56 0.00
 20 8 9 1.49 0.00
 20 8 10 3.47 0.00
 20 10 0 1.10 0.00
 20 10 1 -7.18 0.00
 20 10 2 -0.20 0.00
 20 10 3 -13.21 0.00
 20 10 4 -1.43 0.00
 20 10 5 -3.68 0.00
 20 10 6 5.46 0.00
 20 10 7 -8.21 0.00
 20 10 8 2.52 0.00
 20 10 9 3.01 0.00
 20 12 0 3.20 0.00
 20 12 1 -2.26 0.00
 20 12 2 -4.57 0.00
 20 12 3 -2.30 0.00
 20 12 4 -5.32 0.00
 20 12 5 1.62 0.00
 20 12 6 8.76 0.00
 20 12 7 1.28 0.00
 20 12 8 1.09 0.00
 20 12 9 -2.21 0.00
 20 14 0 7.21 0.00
 20 14 1 1.61 0.00
 20 14 2 -4.21 0.00
 20 14 3 -0.30 0.00
 20 14 4 -6.32 0.00
 20 14 5 3.20 0.00
 20 14 6 1.66 0.00
 20 14 7 -0.67 0.00
 20 14 8 -3.28 0.00
 20 14 9 -3.06 0.00
 20 16 0 0.62 0.00
 20 16 1 9.38 0.00
 20 16 2 -10.22 0.00
 20 16 3 4.64 0.00
 20 16 4 -3.01 0.00
 20 16 5 -1.55 0.00
 20 16 6 6.56 0.00
 20 16 7 -0.27 0.00
 20 16 8 -2.05 0.00
 20 18 0 2.30 0.00
 20 18 1 7.31 0.00
 20 18 2 -3.29 0.00
 20 18 3 2.82 0.00
 20 18 4 -4.47 0.00
 20 18 5 2.17 0.00
 20 18 6 -4.47 0.00
 20 18 7 6.83 0.00
 20 18 8 -7.42 0.00
 20 20 0 -3.40 0.00
 20 20 1 5.55 0.00
 20 20 2 -10.55 0.00
 20 20 3 2.17 0.00
 20 20 4 -9.15 0.00
 20 20 5 1.68 0.00
 20 20 6 -3.65 0.00
 20 20 7 3.96 0.00
 20 22 0 0.86 0.00
 20 22 1 -3.14 0.00
 20 22 2 2.21 0.00
 20 22 3 1.96 0.00
 20 22 4 1.08 0.00
 20 22 5 -1.98 0.00
 20 22 6 0.01 0.00
 20 24 1 -4.09 0.00
 20 24 2 2.12 0.00
 20 24 3 -9.14 0.00
 20 24 4 1.26 0.00
 21 1 0 6.53 0.00
 21 1 1 2.87 0.00
 21 1 2 6.76 0.00
 21 1 3 -1.35 0.00
 21 1 4 0.66 0.00
 21 1 5 -6.22 0.00
 21 1 6 2.73 0.00
 21 1 7 3.05 0.00
 21 1 8 -2.14 0.00
 21 1 9 1.78 0.00
 21 3 0 5.18 0.00
 21 3 1 2.39 0.00
 21 3 2 0.31 0.00
 21 3 3 -0.52 0.00
 21 3 4 -4.87 0.00
 21 3 5 -4.07 0.00
 21 3 6 -0.07 0.00
 21 3 7 0.11 0.00
 21 3 8 1.70 0.00
 21 3 9 -4.27 0.00
 21 5 0 -3.22 0.00
 21 5 1 11.03 0.00
 21 5 2 1.44 0.00
 21 5 3 4.63 0.00
 21 5 4 -5.43 0.00
 21 5 5 0.18 0.00
 21 5 6 0.64 0.00
 21 5 7 -4.57 0.00
 21 5 8 2.18 0.00
 21 5 9 -0.86 0.00
 21 7 0 -0.18 0.00
 21 7 1 3.68 0.00
 21 7 2 0.25 0.00
 21 7 3 4.32 0.00
 21 7 4 -2.88 0.00
 21 7 5 3.70 0.00
 21 7 6 -1.92 0.00
 21 7 7 0.03 0.00
 21 7 8 1.38 0.00
 21 9 0 -2.39 0.00
 21 9 1 -0.07 0.00
 21 9 2 3.81 0.00
 21 9 3 -3.61 0.00
 21 9 4 -3.41 0.00
 21 9 5 0.45 0.00
 21 9 6 -0.53 0.00
 21 9 7 -6.88 0.00
 21 9 8 0.91 0.00
 21 11 0 -2.53 0.00
 21 11 1 0.65 0.00
 21 11 2 2.25 0.00
 21 11 3 -10.31 0.00
 21 11 4 6.13 0.00
 21 11 5 -4.74 0.00
 21 11 6 3.39 0.00
 21 11 7 -1.17 0.00
 21 11 8 1.08 0.00
 21 13 0 -4.40 0.00
 21 13 1 0.10 0.00
 21 13 2 1.70 0.00
 21 13 3 -5.54 0.00
 21 13 4 0.10 0.00
 21 13 5 1.71 0.00
 21 13 6 -1.72 0.00
 21 13 7 6.71 0.00
 21 15 0 -4.24 0.00
 21 15 1 4.67 0.00
 21 15 2 -2.15 0.00
 21 15 3 -2.06 0.00
 21 15 4 2.50 0.00
 21 15 5 -1.47 0.00
 21 15 6 -1.76 0.00
 21 15 7 -0.89 0.00
 21 17 0 -6.86 0.00
 21 17 1 -0.17 0.00
 21 17 2 -4.50 0.00
 21 17 3 3.47 0.00
 21 17 4 -0.82 0.00
 21 17 5 1.06 0.00
 21 17 6 1.84 0.00
 21 19 1 0.28 0.00
 21 19 2 0.38 0.00
 21 19 3 -1.77 0.00
 21 19 4 1.69 0.00
 21 19 5 -0.01 0.00
 22 0 0 3.24 0.00
 22 0 1 5.85 0.00
 22 0 2 5.64 0.00
 22 0 3 -2.62 0.00
 22 0 4 -7.46 0.00
 22 0 5 -1.02 0.00
 22 0 6 3.58 0.00
 22 0 7 3.88 0.00
 22 2 0 11.42 0.00
 22 2 1 -0.47 0.00
 22 2 2 3.91 0.00
 22 2 3 -2.05 0.00
 22 2 4 -4.08 0.00
 22 2 5 -6.49 0.00
 22 2 6 1.43 0.00
 22 2 7 -2.49 0.00
 22 4 0 3.74 0.00
 22 4 1 5.96 0.00
 22 4 2 4.91 0.00
 22 4 3 -1.70 0.00
 22 4 4 -3.43 0.00
 22 4 5 -3.20 0.00
 22 4 6 1.70 0.00
 22 4 7 0.53 0.00
 22 6 0 3.40 0.00
 22 6 1 8.17 0.00
 22 6 2 5.37 0.00
 22 6 3 4.84 0.00
 22 6 4 2.07 0.00
 22 6 5 1.43 0.00
 22 6 6 -3.03 0.00
 22 6 7 1.90 0.00
 22 8 0 -1.40 0.00
 22 8 1 3.16 0.00
 22 8 2 3.35 0.00
 22 8 3 6.98 0.00
 22 8 4 -2.73 0.00
 22 8 5 8.95 0.00
 22 8 6 -3.84 0.00
 22 10 0 -0.55 0.00
 22 10 1 -0.55 0.00
 22 10 2 0.47 0.00
 22 10 3 -0.08 0.00
 22 10 4 -5.45 0.00
 22 10 5 0.11 0.00
 22 10 6 -4.96 0.00
 22 12 0 -1.11 0.00
 22 12 1 1.76 0.00
 22 12 2 -5.15 0.00
 22 12 3 9.50 0.00
 22 12 4 -9.19 0.00
 22 12 5 7.34 0.00
 22 14 1 -3.77 0.00
 22 14 2 2.42 0.00
 22 14 3 5.48 0.00
 22 14 4 -1.46 0.00
 23 1 1 -2.05 0.00
 23 1 2 -5.78 0.00
 23 1 3 4.30 0.00
 23 1 4 -0.23 0.00
 23 3 1 -3.30 0.00
 23 3 2 -0.79 0.00
 23 3 3 1.89 0.00
 23 3 4 -0.74 0.00
 23 5 1 0.40 0.00
 23 5 2 5.56 0.00
 23 5 3 3.69 0.00
 23 5 4 -0.34 0.00
 23 7 2 3.69 0.00
 23 7 3 4.39 0.00
 18 0 0 12.94 0.00
 1 1 0 324.29 0.00
 17 1 0 17.16 0.00
 23 1 0 -6.56 0.00
 0 2 0 558.21 0.00
 18 2 0 28.42 0.00
 1 3 0 -143.67 0.00
 23 3 0 3.22 0.00
 0 4 0 265.89 0.00
 1 5 0 114.59 0.00
 23 5 0 6.39 0.00
 23 7 0 3.74 0.00
 23 9 0 0.25 0.00
 23 11 0 -3.10 0.00
 23 13 0 1.61 0.00
 22 14 0 6.21 0.00
 23 15 0 2.65 0.00
 22 16 0 3.40 0.00
 23 17 0 -2.33 0.00
 22 18 0 -1.82 0.00
 21 19 0 -3.64 0.00
 23 19 0 -4.90 0.00
 22 20 0 -6.64 0.00
 21 21 0 -10.89 0.00
 23 21 0 -5.59 0.00
 22 22 0 -6.39 0.00
 21 23 0 -12.07 0.00
 23 23 0 -7.82 0.00
 20 24 0 0.27 0.00
 22 24 0 -5.88 0.00
 21 25 0 -10.07 0.00
 23 25 0 -4.88 0.00
 20 26 0 1.80 0.00
 22 26 0 -2.87 0.00
 21 27 0 -1.38 0.00
 23 27 0 -4.41 0.00
 20 28 0 2.44 0.00
 22 28 0 -2.77 0.00
 19 29 0 2.59 0.00
 21 29 0 4.33 0.00
 20 30 0 0.61 0.00
 22 30 0 0.59 0.00
 19 31 0 -1.12 0.00
 21 31 0 0.67 0.00
 18 32 0 3.55 0.00
 20 32 0 -0.68 0.00
 22 32 0 -0.60 0.00
 17 33 0 6.28 0.00
 19 33 0 1.89 0.00
 21 33 0 2.36 0.00
 18 34 0 5.10 0.00
 20 34 0 -1.18 0.00
 17 35 0 -1.28 0.00
 19 35 0 -1.65 0.00
 16 36 0 7.06 0.00
 18 36 0 -1.99 0.00
 20 36 0 2.01 0.00
 17 37 0 -9.57 0.00
 19 37 0 0.65 0.00
 16 38 0 10.90 0.00
 18 38 0 -5.12 0.00
 15 39 0 9.04 0.00
 17 39 0 -0.35 0.00
 19 39 0 -3.37 0.00
 14 40 0 -3.41 0.00
 16 40 0 13.08 0.00
 18 40 0 -2.12 0.00
 13 41 0 0.10 0.00
 15 41 0 4.57 0.00
 17 41 0 6.56 0.00
 12 42 0 8.42 0.00
 14 42 0 -6.07 0.00
 16 42 0 -0.94 0.00
 13 43 0 3.69 0.00
 15 43 0 -0.98 0.00
 17 43 0 7.25 0.00
 12 44 0 5.64 0.00
 14 44 0 1.26 0.00
 16 44 0 0.71 0.00
 11 45 0 3.56 0.00
 13 45 0 2.93 0.00
 15 45 0 -0.31 0.00
 10 46 0 2.17 0.00
 12 46 0 3.84 0.00
 14 46 0 1.37 0.00
 9 47 0 -6.88 0.00
 11 47 0 4.48 0.00
 13 47 0 -2.26 0.00
 0 48 0 11.02 0.00
 6 48 0 2.91 0.00
 8 48 0 -3.64 0.00
 10 48 0 -1.55 0.00
 12 48 0 -1.24 0.00
 1 49 0 0.77 0.00
 5 49 0 0.97 0.00
 7 49 0 4.38 0.00
 9 49 0 -5.95 0.00
 11 49 0 3.59 0.00
 0 0 1 51.80 0.00
 18 0 1 20.25 0.00
 17 1 1 20.15 0.00
 0 2 1 104.99 0.00
 23 7 1 -0.69 0.00
 23 9 1 -3.26 0.00
 23 11 1 1.36 0.00
 23 13 1 2.25 0.00
 23 15 1 3.16 0.00
 22 16 1 -9.02 0.00
 23 17 1 -4.74 0.00
 22 18 1 -18.06 0.00
 23 19 1 -4.53 0.00
 22 20 1 -9.65 0.00
 21 21 1 -4.74 0.00
 23 21 1 -5.08 0.00
 22 22 1 -8.85 0.00
 21 23 1 -5.21 0.00
 23 23 1 0.32 0.00
 22 24 1 -8.51 0.00
 21 25 1 -0.22 0.00
 23 25 1 -2.02 0.00
 20 26 1 3.53 0.00
 22 26 1 -7.45 0.00
 21 27 1 6.47 0.00
 23 27 1 -1.21 0.00
 20 28 1 9.13 0.00
 22 28 1 2.17 0.00
 19 29 1 1.35 0.00
 21 29 1 5.37 0.00
 20 30 1 -0.60 0.00
 22 30 1 0.88 0.00
 19 31 1 -2.50 0.00
 21 31 1 -6.45 0.00
 18 32 1 1.85 0.00
 20 32 1 -5.38 0.00
 19 33 1 3.98 0.00
 21 33 1 0.24 0.00
 18 34 1 7.47 0.00
 20 34 1 3.97 0.00
 17 35 1 -3.19 0.00
 19 35 1 1.39 0.00
 16 36 1 -9.07 0.00
 18 36 1 -1.87 0.00
 20 36 1 0.20 0.00
 17 37 1 3.31 0.00
 19 37 1 -1.30 0.00
 16 38 1 4.36 0.00
 18 38 1 -6.30 0.00
 15 39 1 0.65 0.00
 17 39 1 1.56 0.00
 19 39 1 -6.35 0.00
 14 40 1 -8.96 0.00
 16 40 1 8.03 0.00
 18 40 1 -8.15 0.00
 13 41 1 -5.38 0.00
 15 41 1 -3.23 0.00
 17 41 1 8.35 0.00
 14 42 1 -4.82 0.00
 16 42 1 16.48 0.00
 13 43 1 5.68 0.00
 15 43 1 -1.20 0.00
 17 43 1 3.26 0.00
 12 44 1 5.49 0.00
 14 44 1 -3.20 0.00
 16 44 1 2.01 0.00
 11 45 1 0.99 0.00
 13 45 1 4.89 0.00
 15 45 1 -3.24 0.00
 10 46 1 -0.74 0.00
 12 46 1 3.06 0.00
 14 46 1 2.05 0.00
 9 47 1 2.01 0.00
 11 47 1 -0.47 0.00
 13 47 1 2.47 0.00
 0 48 1 -3.41 0.00
 6 48 1 5.97 0.00
 8 48 1 1.43 0.00
 10 48 1 1.33 0.00
 12 48 1 -2.18 0.00
 1 49 1 -1.22 0.00
 5 49 1 1.68 0.00
 7 49 1 1.20 0.00
 9 49 1 0.51 0.00
 11 49 1 0.07 0.00
 18 0 2 13.23 0.00
 17 1 2 3.88 0.00
 23 9 2 2.35 0.00
 23 11 2 -1.20 0.00
 23 13 2 1.19 0.00
 23 15 2 0.18 0.00
 22 16 2 -0.17 0.00
 23 17 2 -7.42 0.00
 22 18 2 1.71 0.00
 23 19 2 -5.43 0.00
 22 20 2 -5.01 0.00
 21 21 2 -3.01 0.00
 23 21 2 -5.75 0.00
 22 22 2 -0.44 0.00
 21 23 2 1.15 0.00
 23 23 2 -0.12 0.00
 22 24 2 -2.36 0.00
 21 25 2 -5.20 0.00
 23 25 2 -4.08 0.00
 20 26 2 5.78 0.00
 22 26 2 2.32 0.00
 21 27 2 4.98 0.00
 23 27 2 2.22 0.00
 20 28 2 2.47 0.00
 22 28 2 2.29 0.00
 19 29 2 -2.90 0.00
 21 29 2 -2.17 0.00
 20 30 2 -0.54 0.00
 22 30 2 2.01 0.00
 19 31 2 -2.16 0.00
 21 31 2 -1.57 0.00
 18 32 2 0.12 0.00
 20 32 2 -4.72 0.00
 19 33 2 -0.20 0.00
 21 33 2 -3.02 0.00
 18 34 2 7.18 0.00
 20 34 2 -2.97 0.00
 17 35 2 4.41 0.00
 19 35 2 4.78 0.00
 16 36 2 -3.05 0.00
 18 36 2 -5.43 0.00
 20 36 2 -2.26 0.00
 17 37 2 -9.28 0.00
 19 37 2 3.92 0.00
 16 38 2 3.89 0.00
 18 38 2 -3.55 0.00
 15 39 2 3.63 0.00
 17 39 2 -3.45 0.00
 19 39 2 0.05 0.00
 14 40 2 -3.85 0.00
 16 40 2 3.51 0.00
 18 40 2 -4.51 0.00
 13 41 2 -1.12 0.00
 15 41 2 0.17 0.00
 17 41 2 0.58 0.00
 14 42 2 -4.46 0.00
 16 42 2 -0.60 0.00
 13 43 2 2.92 0.00
 15 43 2 -1.49 0.00
 17 43 2 3.95 0.00
 12 44 2 4.78 0.00
 14 44 2 -0.16 0.00
 16 44 2 -0.58 0.00
 11 45 2 1.06 0.00
 13 45 2 0.53 0.00
 15 45 2 -1.40 0.00
 10 46 2 1.45 0.00
 12 46 2 0.80 0.00
 14 46 2 -0.71 0.00
 9 47 2 -4.86 0.00
 11 47 2 3.72 0.00
 13 47 2 -1.51 0.00
 0 48 2 -1.53 0.00
 6 48 2 5.20 0.00
 8 48 2 1.93 0.00
 10 48 2 1.73 0.00
 12 48 2 -0.37 0.00
 1 49 2 0.49 0.00
 5 49 2 4.37 0.00
 7 49 2 5.46 0.00
 9 49 2 -2.92 0.00
 11 49 2 2.37 0.00
 18 0 3 1.88 0.00
 17 1 3 2.09 0.00
 19 1 3 3.61 0.00
 18 2 3 -5.63 0.00
 23 9 3 -1.47 0.00
 23 11 3 -4.11 0.00
 23 13 3 0.70 0.00
 23 15 3 0.71 0.00
 22 16 3 -2.01 0.00
 23 17 3 2.25 0.00
 22 18 3 -5.89 0.00
 23 19 3 -1.50 0.00
 22 20 3 -0.03 0.00
 21 21 3 -0.06 0.00
 23 21 3 3.41 0.00
 22 22 3 8.46 0.00
 21 23 3 -7.78 0.00
 23 23 3 -0.24 0.00
 22 24 3 -2.79 0.00
 21 25 3 -0.21 0.00
 23 25 3 1.35 0.00
 20 26 3 2.93 0.00
 22 26 3 1.32 0.00
 21 27 3 4.82 0.00
 23 27 3 0.37 0.00
 20 28 3 -2.43 0.00
 22 28 3 -2.95 0.00
 19 29 3 -4.83 0.00
 21 29 3 1.47 0.00
 20 30 3 -2.87 0.00
 22 30 3 -0.41 0.00
 19 31 3 0.25 0.00
 21 31 3 -3.09 0.00
 18 32 3 -0.47 0.00
 20 32 3 -9.33 0.00
 19 33 3 -0.43 0.00
 21 33 3 -3.97 0.00
 18 34 3 14.03 0.00
 20 34 3 1.54 0.00
 17 35 3 0.41 0.00
 19 35 3 4.52 0.00
 16 36 3 -8.45 0.00
 18 36 3 10.86 0.00
 20 36 3 1.31 0.00
 17 37 3 -4.33 0.00
 19 37 3 -1.07 0.00
 16 38 3 -6.67 0.00
 18 38 3 0.20 0.00
 15 39 3 -3.27 0.00
 17 39 3 -2.34 0.00
 14 40 3 -3.60 0.00
 16 40 3 -0.23 0.00
 18 40 3 -1.56 0.00
 13 41 3 -2.66 0.00
 15 41 3 -2.99 0.00
 17 41 3 4.02 0.00
 14 42 3 -3.97 0.00
 16 42 3 4.74 0.00
 13 43 3 1.41 0.00
 15 43 3 -1.83 0.00
 12 44 3 -0.65 0.00
 14 44 3 -1.99 0.00
 16 44 3 -2.33 0.00
 11 45 3 -3.31 0.00
 13 45 3 0.75 0.00
 15 45 3 -2.30 0.00
 10 46 3 -3.08 0.00
 12 46 3 -1.75 0.00
 14 46 3 2.17 0.00
 7 47 3 3.71 0.00
 9 47 3 3.43 0.00
 11 47 3 0.40 0.00
 13 47 3 0.82 0.00
 6 48 3 5.15 0.00
 8 48 3 -1.43 0.00
 10 48 3 2.45 0.00
 12 48 3 -1.36 0.00
 1 49 3 -3.28 0.00
 3 49 3 4.36 0.00
 5 49 3 -0.06 0.00
 7 49 3 2.95 0.00
 9 49 3 1.54 0.00
 11 49 3 0.59 0.00
 0 0 4 56.86 0.00
 18 0 4 -5.41 0.00
 17 1 4 -0.44 0.00
 19 1 4 -0.78 0.00
 18 2 4 -3.43 0.00
 23 7 4 2.74 0.00
 23 9 4 -0.28 0.00
 23 11 4 2.21 0.00
 23 13 4 2.79 0.00
 23 15 4 5.19 0.00
 22 16 4 4.98 0.00
 23 17 4 -0.22 0.00
 22 18 4 5.43 0.00
 23 19 4 -2.28 0.00
 22 20 4 3.85 0.00
 21 21 4 10.53 0.00
 23 21 4 7.20 0.00
 22 22 4 2.13 0.00
 21 23 4 0.63 0.00
 23 23 4 -0.49 0.00
 22 24 4 -5.78 0.00
 21 25 4 1.05 0.00
 23 25 4 1.71 0.00
 20 26 4 2.77 0.00
 22 26 4 -2.51 0.00
 21 27 4 -3.78 0.00
 23 27 4 -2.20 0.00
 20 28 4 -2.48 0.00
 22 28 4 -1.87 0.00
 19 29 4 -0.95 0.00
 21 29 4 -1.00 0.00
 20 30 4 -3.06 0.00
 22 30 4 3.70 0.00
 19 31 4 -7.18 0.00
 21 31 4 -4.44 0.00
 18 32 4 5.12 0.00
 20 32 4 -6.72 0.00
 17 33 4 11.82 0.00
 19 33 4 -1.72 0.00
 21 33 4 -1.55 0.00
 18 34 4 7.83 0.00
 20 34 4 -3.45 0.00
 17 35 4 7.81 0.00
 19 35 4 1.57 0.00
 16 36 4 -6.29 0.00
 18 36 4 -0.67 0.00
 20 36 4 -2.79 0.00
 17 37 4 -1.69 0.00
 19 37 4 4.51 0.00
 16 38 4 -3.87 0.00
 18 38 4 0.95 0.00
 15 39 4 -2.20 0.00
 17 39 4 -2.49 0.00
 14 40 4 -1.62 0.00
 16 40 4 -2.92 0.00
 18 40 4 -0.67 0.00
 13 41 4 0.61 0.00
 15 41 4 0.42 0.00
 17 41 4 -1.62 0.00
 12 42 4 0.16 0.00
 14 42 4 0.86 0.00
 16 42 4 -0.95 0.00
 11 43 4 -1.80 0.00
 13 43 4 -0.51 0.00
 15 43 4 0.18 0.00
 10 44 4 0.38 0.00
 12 44 4 -2.33 0.00
 14 44 4 2.43 0.00
 9 45 4 -7.82 0.00
 11 45 4 -5.10 0.00
 13 45 4 -3.50 0.00
 15 45 4 -0.05 0.00
 8 46 4 -3.81 0.00
 10 46 4 1.54 0.00
 12 46 4 -5.40 0.00
 14 46 4 0.91 0.00
 7 47 4 -3.85 0.00
 9 47 4 -6.35 0.00
 11 47 4 1.56 0.00
 13 47 4 -1.09 0.00
 4 48 4 1.07 0.00
 6 48 4 4.63 0.00
 8 48 4 -1.41 0.00
 10 48 4 4.71 0.00
 12 48 4 -1.04 0.00
 1 49 4 1.87 0.00
 3 49 4 0.13 0.00
 5 49 4 4.88 0.00
 7 49 4 1.25 0.00
 9 49 4 -2.41 0.00
 11 49 4 2.43 0.00
 0 0 5 3.81 0.00
 16 0 5 11.06 0.00
 18 0 5 -1.51 0.00
 17 1 5 -4.69 0.00
 23 1 5 2.28 0.00
 18 2 5 -8.81 0.00
 17 3 5 -13.24 0.00
 23 3 5 -1.81 0.00
 23 5 5 -0.79 0.00
 23 7 5 2.22 0.00
 23 9 5 -0.97 0.00
 23 11 5 -4.76 0.00
 23 13 5 -0.98 0.00
 22 14 5 5.28 0.00
 23 15 5 -4.73 0.00
 22 16 5 -4.08 0.00
 23 17 5 -2.75 0.00
 22 18 5 -0.23 0.00
 23 19 5 -1.55 0.00
 22 20 5 7.08 0.00
 21 21 5 -2.81 0.00
 23 21 5 3.16 0.00
 22 22 5 10.71 0.00
 21 23 5 -5.44 0.00
 23 23 5 0.59 0.00
 20 24 5 -7.12 0.00
 22 24 5 6.80 0.00
 21 25 5 -1.52 0.00
 23 25 5 1.10 0.00
 20 26 5 -4.08 0.00
 22 26 5 4.14 0.00
 21 27 5 3.75 0.00
 20 28 5 4.36 0.00
 22 28 5 4.12 0.00
 19 29 5 0.70 0.00
 21 29 5 0.71 0.00
 18 30 5 -6.11 0.00
 20 30 5 -0.04 0.00
 19 31 5 1.97 0.00
 21 31 5 -0.16 0.00
 18 32 5 -0.17 0.00
 20 32 5 -0.27 0.00
 17 33 5 1.47 0.00
 19 33 5 0.62 0.00
 18 34 5 2.44 0.00
 20 34 5 -4.29 0.00
 17 35 5 0.14 0.00
 19 35 5 2.93 0.00
 16 36 5 -6.13 0.00
 18 36 5 7.94 0.00
 15 37 5 -4.45 0.00
 17 37 5 -4.56 0.00
 19 37 5 2.13 0.00
 16 38 5 -6.49 0.00
 18 38 5 -0.20 0.00
 15 39 5 -3.24 0.00
 17 39 5 -3.52 0.00
 14 40 5 1.49 0.00
 16 40 5 2.18 0.00
 13 41 5 -0.17 0.00
 15 41 5 2.68 0.00
 17 41 5 0.36 0.00
 12 42 5 -1.82 0.00
 14 42 5 -2.19 0.00
 16 42 5 4.01 0.00
 11 43 5 -2.96 0.00
 13 43 5 -1.59 0.00
 15 43 5 1.80 0.00
 10 44 5 -4.58 0.00
 12 44 5 -3.74 0.00
 14 44 5 -2.16 0.00
 9 45 5 1.21 0.00
 11 45 5 -1.98 0.00
 13 45 5 2.90 0.00
 8 46 5 -5.20 0.00
 10 46 5 -3.73 0.00
 12 46 5 -0.84 0.00
 14 46 5 2.06 0.00
 5 47 5 3.76 0.00
 7 47 5 -0.84 0.00
 9 47 5 -0.61 0.00
 11 47 5 -0.73 0.00
 13 47 5 1.11 0.00
 2 48 5 4.82 0.00
 4 48 5 1.27 0.00
 6 48 5 -0.15 0.00
 8 48 5 -5.96 0.00
 10 48 5 -0.11 0.00
 12 48 5 0.48 0.00
 1 49 5 -3.50 0.00
 3 49 5 -0.33 0.00
 5 49 5 0.94 0.00
 7 49 5 -1.45 0.00
 9 49 5 -0.86 0.00
 11 49 5 1.17 0.00
 0 0 6 32.22 0.00
 16 0 6 -6.33 0.00
 18 0 6 -6.82 0.00
 17 1 6 4.14 0.00
 23 1 6 4.70 0.00
 0 2 6 -12.49 0.00
 17 3 6 -1.35 0.00
 23 3 6 1.37 0.00
 23 5 6 -0.76 0.00
 23 7 6 0.85 0.00
 23 9 6 -0.79 0.00
 23 11 6 -2.34 0.00
 22 12 6 -2.78 0.00
 23 13 6 -1.38 0.00
 22 14 6 -6.24 0.00
 23 15 6 1.28 0.00
 22 16 6 0.94 0.00
 23 17 6 1.79 0.00
 22 18 6 -4.97 0.00
 21 19 6 2.61 0.00
 23 19 6 0.24 0.00
 22 20 6 2.75 0.00
 21 21 6 11.41 0.00
 23 21 6 6.04 0.00
 22 22 6 -6.25 0.00
 21 23 6 -6.03 0.00
 23 23 6 -2.57 0.00
 20 24 6 6.79 0.00
 22 24 6 -6.16 0.00
 21 25 6 1.98 0.00
 23 25 6 3.96 0.00
 20 26 6 7.12 0.00
 22 26 6 -5.87 0.00
 19 27 6 -2.41 0.00
 21 27 6 -4.24 0.00
 20 28 6 2.37 0.00
 22 28 6 -0.80 0.00
 19 29 6 8.90 0.00
 21 29 6 4.28 0.00
 18 30 6 5.39 0.00
 20 30 6 -2.95 0.00
 19 31 6 -2.33 0.00
 21 31 6 -2.52 0.00
 18 32 6 7.35 0.00
 20 32 6 -1.04 0.00
 17 33 6 6.88 0.00
 19 33 6 -0.32 0.00
 16 34 6 1.92 0.00
 18 34 6 2.19 0.00
 20 34 6 -2.38 0.00
 17 35 6 1.25 0.00
 19 35 6 -4.72 0.00
 16 36 6 -2.32 0.00
 18 36 6 2.25 0.00
 15 37 6 -2.01 0.00
 17 37 6 -1.40 0.00
 14 38 6 -1.35 0.00
 16 38 6 -4.71 0.00
 18 38 6 1.34 0.00
 13 39 6 2.99 0.00
 15 39 6 3.78 0.00
 17 39 6 1.17 0.00
 14 40 6 1.27 0.00
 16 40 6 -1.11 0.00
 13 41 6 -0.07 0.00
 15 41 6 2.93 0.00
 12 42 6 -0.49 0.00
 14 42 6 1.18 0.00
 16 42 6 -0.32 0.00
 11 43 6 -5.86 0.00
 13 43 6 -3.47 0.00
 15 43 6 0.64 0.00
 10 44 6 1.24 0.00
 12 44 6 2.80 0.00
 14 44 6 3.28 0.00
 9 45 6 -2.15 0.00
 11 45 6 -2.64 0.00
 13 45 6 0.32 0.00
 6 46 6 1.26 0.00
 8 46 6 -1.00 0.00
 10 46 6 -0.07 0.00
 12 46 6 -1.82 0.00
 5 47 6 1.57 0.00
 7 47 6 0.46 0.00
 9 47 6 -1.01 0.00
 11 47 6 -0.30 0.00
 0 48 6 -2.10 0.00
 2 48 6 0.25 0.00
 4 48 6 2.09 0.00
 6 48 6 2.35 0.00
 8 48 6 -3.00 0.00
 10 48 6 -1.09 0.00
 1 49 6 1.59 0.00
 3 49 6 -0.57 0.00
 5 49 6 -1.21 0.00
 7 49 6 -2.58 0.00
 9 49 6 -1.44 0.00
 0 0 7 -55.33 0.00
 16 0 7 11.75 0.00
 18 0 7 -1.54 0.00
 1 1 7 0.89 0.00
 17 1 7 4.96 0.00
 23 1 7 9.53 0.00
 0 2 7 -31.79 0.00
 16 2 7 5.14 0.00
 23 3 7 1.97 0.00
 0 4 7 -18.55 0.00
 23 5 7 -3.24 0.00
 0 6 7 -17.04 0.00
 23 7 7 1.26 0.00
 22 8 7 2.68 0.00
 23 9 7 -3.34 0.00
 22 10 7 -9.52 0.00
 23 11 7 -0.31 0.00
 22 12 7 3.05 0.00
 23 13 7 3.38 0.00
 22 14 7 -0.66 0.00
 23 15 7 -3.50 0.00
 22 16 7 -5.58 0.00
 21 17 7 0.50 0.00
 23 17 7 -3.39 0.00
 22 18 7 0.82 0.00
 21 19 7 0.58 0.00
 23 19 7 -1.65 0.00
 22 20 7 1.37 0.00
 21 21 7 -6.87 0.00
 23 21 7 -2.85 0.00
 20 22 7 -3.18 0.00
 22 22 7 2.05 0.00
 21 23 7 -2.94 0.00
 23 23 7 -0.67 0.00
 20 24 7 -9.48 0.00
 22 24 7 -0.13 0.00
 19 25 7 5.58 0.00
 21 25 7 -1.19 0.00
 20 26 7 -7.01 0.00
 22 26 7 2.52 0.00
 19 27 7 2.58 0.00
 21 27 7 0.58 0.00
 18 28 7 2.47 0.00
 20 28 7 -1.13 0.00
 19 29 7 2.63 0.00
 21 29 7 -1.29 0.00
 18 30 7 0.56 0.00
 20 30 7 5.89 0.00
 17 31 7 -0.81 0.00
 19 31 7 0.80 0.00
 18 32 7 0.15 0.00
 20 32 7 3.70 0.00
 17 33 7 2.06 0.00
 19 33 7 -0.06 0.00
 16 34 7 -2.29 0.00
 18 34 7 -2.76 0.00
 15 35 7 -0.54 0.00
 17 35 7 2.27 0.00
 19 35 7 0.16 0.00
 16 36 7 -0.46 0.00
 18 36 7 4.80 0.00
 15 37 7 -2.25 0.00
 17 37 7 -1.37 0.00
 14 38 7 4.03 0.00
 16 38 7 -2.46 0.00
 13 39 7 -1.66 0.00
 15 39 7 -3.27 0.00
 17 39 7 -1.11 0.00
 12 40 7 2.15 0.00
 14 40 7 -0.36 0.00
 16 40 7 3.93 0.00
 11 41 7 5.15 0.00
 13 41 7 1.45 0.00
 15 41 7 0.87 0.00
 10 42 7 -5.74 0.00
 12 42 7 -2.31 0.00
 14 42 7 -5.34 0.00
 9 43 7 -1.25 0.00
 11 43 7 -2.03 0.00
 13 43 7 -0.33 0.00
 15 43 7 -1.32 0.00
 8 44 7 2.00 0.00
 10 44 7 -5.22 0.00
 12 44 7 -0.96 0.00
 14 44 7 -1.38 0.00
 7 45 7 3.11 0.00
 9 45 7 4.48 0.00
 11 45 7 0.40 0.00
 13 45 7 6.05 0.00
 4 46 7 0.61 0.00
 6 46 7 1.28 0.00
 8 46 7 4.11 0.00
 10 46 7 -0.09 0.00
 12 46 7 2.18 0.00
 1 47 7 -6.54 0.00
 3 47 7 0.26 0.00
 5 47 7 -2.43 0.00
 7 47 7 -3.17 0.00
 9 47 7 -2.16 0.00
 11 47 7 -2.95 0.00
 0 48 7 -5.23 0.00
 2 48 7 -1.73 0.00
 4 48 7 -3.28 0.00
 6 48 7 -3.59 0.00
 8 48 7 -0.12 0.00
 10 48 7 1.82 0.00
 1 49 7 -5.58 0.00
 3 49 7 2.44 0.00
 5 49 7 -0.49 0.00
 7 49 7 -0.30 0.00
 9 49 7 -0.81 0.00
 0 0 8 -9.26 0.00
 2 0 8 8.85 0.00
 16 0 8 -6.77 0.00
 22 0 8 7.56 0.00
 1 1 8 -18.54 0.00
 23 1 8 -2.87 0.00
 0 2 8 -28.15 0.00
 16 2 8 3.08 0.00
 22 2 8 7.05 0.00
 1 3 8 -26.47 0.00
 23 3 8 -3.01 0.00
 0 4 8 -27.87 0.00
 22 4 8 0.09 0.00
 23 5 8 -3.60 0.00
 0 6 8 -9.24 0.00
 22 6 8 -2.28 0.00
 23 7 8 -0.58 0.00
 0 8 8 7.62 0.00
 22 8 8 -2.34 0.00
 23 9 8 0.73 0.00
 0 10 8 -3.71 0.00
 22 10 8 1.25 0.00
 23 11 8 -0.33 0.00
 22 12 8 0.74 0.00
 21 13 8 -5.37 0.00
 23 13 8 0.39 0.00
 22 14 8 1.16 0.00
 21 15 8 -7.03 0.00
 23 15 8 3.19 0.00
 22 16 8 -0.38 0.00
 21 17 8 -9.93 0.00
 23 17 8 -2.93 0.00
 22 18 8 -2.69 0.00
 21 19 8 2.62 0.00
 23 19 8 2.34 0.00
 0 20 8 12.60 0.00
 20 20 8 -4.57 0.00
 22 20 8 0.38 0.00
 21 21 8 1.02 0.00
 23 21 8 -3.57 0.00
 20 22 8 3.78 0.00
 22 22 8 -3.83 0.00
 19 23 8 4.61 0.00
 21 23 8 0.33 0.00
 20 24 8 12.61 0.00
 22 24 8 -3.22 0.00
 19 25 8 2.95 0.00
 21 25 8 -2.99 0.00
 18 26 8 2.85 0.00
 20 26 8 12.31 0.00
 19 27 8 -0.22 0.00
 21 27 8 -1.21 0.00
 18 28 8 -2.56 0.00
 20 28 8 0.00 0.00
 17 29 8 10.22 0.00
 19 29 8 5.12 0.00
 21 29 8 -0.61 0.00
 18 30 8 0.20 0.00
 20 30 8 0.64 0.00
 17 31 8 5.14 0.00
 19 31 8 1.07 0.00
 16 32 8 -1.12 0.00
 18 32 8 -3.64 0.00
 20 32 8 -2.11 0.00
 15 33 8 3.10 0.00
 17 33 8 3.51 0.00
 19 33 8 -1.85 0.00
 16 34 8 7.07 0.00
 18 34 8 -2.14 0.00
 15 35 8 2.97 0.00
 17 35 8 -0.67 0.00
 14 36 8 -2.83 0.00
 16 36 8 -0.79 0.00
 18 36 8 -3.03 0.00
 13 37 8 1.77 0.00
 15 37 8 1.53 0.00
 17 37 8 -1.98 0.00
 12 38 8 6.70 0.00
 14 38 8 3.47 0.00
 16 38 8 -1.99 0.00
 13 39 8 -2.20 0.00
 15 39 8 1.12 0.00
 12 40 8 0.06 0.00
 14 40 8 -1.06 0.00
 16 40 8 -4.07 0.00
 11 41 8 -1.80 0.00
 13 41 8 -6.45 0.00
 15 41 8 -0.32 0.00
 8 42 8 2.44 0.00
 10 42 8 -2.65 0.00
 12 42 8 -1.97 0.00
 14 42 8 -0.27 0.00
 7 43 8 -4.97 0.00
 9 43 8 -5.48 0.00
 11 43 8 -8.10 0.00
 13 43 8 -5.83 0.00
 6 44 8 -5.31 0.00
 8 44 8 3.33 0.00
 10 44 8 3.20 0.00
 12 44 8 4.88 0.00
 5 45 8 0.92 0.00
 7 45 8 3.62 0.00
 9 45 8 5.39 0.00
 11 45 8 4.69 0.00
 13 45 8 5.14 0.00
 0 46 8 -7.83 0.00
 2 46 8 -4.91 0.00
 4 46 8 -1.95 0.00
 6 46 8 -1.35 0.00
 8 46 8 -1.41 0.00
 10 46 8 0.30 0.00
 12 46 8 -0.31 0.00
 1 47 8 -2.14 0.00
 3 47 8 -5.64 0.00
 5 47 8 -2.16 0.00
 7 47 8 -1.32 0.00
 9 47 8 0.42 0.00
 11 47 8 -1.09 0.00
 0 48 8 -6.58 0.00
 2 48 8 -1.12 0.00
 4 48 8 -0.60 0.00
 6 48 8 -0.18 0.00
 8 48 8 -2.96 0.00
 10 48 8 -0.11 0.00
 1 49 8 1.34 0.00
 3 49 8 -2.67 0.00
 5 49 8 1.71 0.00
 7 49 8 1.30 0.00
 9 49 8 3.89 0.00
 16 0 9 8.84 0.00
 22 0 9 -3.82 0.00
 15 1 9 10.18 0.00
 23 1 9 6.29 0.00
 22 2 9 -7.81 0.00
 23 3 9 -1.86 0.00
 22 4 9 -4.30 0.00
 23 5 9 -1.72 0.00
 22 6 9 4.72 0.00
 21 7 9 4.62 0.00
 23 7 9 4.74 0.00
 22 8 9 0.34 0.00
 21 9 9 -3.68 0.00
 23 9 9 1.61 0.00
 22 10 9 1.66 0.00
 21 11 9 -0.13 0.00
 23 11 9 3.98 0.00
 22 12 9 5.33 0.00
 21 13 9 -2.75 0.00
 23 13 9 2.49 0.00
 22 14 9 3.07 0.00
 21 15 9 -0.75 0.00
 23 15 9 2.24 0.00
 20 16 9 -10.23 0.00
 22 16 9 -9.25 0.00
 21 17 9 -2.55 0.00
 23 17 9 -0.76 0.00
 20 18 9 0.67 0.00
 22 18 9 -5.45 0.00
 21 19 9 5.14 0.00
 23 19 9 1.34 0.00
 20 20 9 1.10 0.00
 22 20 9 -3.69 0.00
 19 21 9 -7.20 0.00
 21 21 9 -1.60 0.00
 20 22 9 0.17 0.00
 22 22 9 -0.44 0.00
 19 23 9 5.61 0.00
 21 23 9 6.22 0.00
 18 24 9 4.50 0.00
 20 24 9 0.06 0.00
 19 25 9 4.36 0.00
 21 25 9 4.53 0.00
 18 26 9 4.01 0.00
 20 26 9 -3.69 0.00
 17 27 9 0.07 0.00
 19 27 9 0.67 0.00
 21 27 9 2.29 0.00
 18 28 9 9.58 0.00
 20 28 9 0.91 0.00
 17 29 9 -3.77 0.00
 19 29 9 1.45 0.00
 16 30 9 6.10 0.00
 18 30 9 6.04 0.00
 20 30 9 3.37 0.00
 17 31 9 -4.81 0.00
 19 31 9 -4.66 0.00
 16 32 9 2.76 0.00
 18 32 9 -1.45 0.00
 15 33 9 -1.08 0.00
 17 33 9 0.85 0.00
 19 33 9 -1.08 0.00
 14 34 9 2.48 0.00
 16 34 9 -0.75 0.00
 18 34 9 -2.22 0.00
 13 35 9 6.83 0.00
 15 35 9 3.12 0.00
 17 35 9 0.16 0.00
 14 36 9 7.17 0.00
 16 36 9 -1.20 0.00
 13 37 9 9.78 0.00
 15 37 9 3.84 0.00
 17 37 9 -1.27 0.00
 12 38 9 -0.16 0.00
 14 38 9 5.05 0.00
 16 38 9 0.32 0.00
 11 39 9 3.16 0.00
 13 39 9 0.74 0.00
 15 39 9 -0.55 0.00
 10 40 9 0.06 0.00
 12 40 9 -2.47 0.00
 14 40 9 -6.58 0.00
 9 41 9 -0.69 0.00
 11 41 9 6.39 0.00
 13 41 9 -2.21 0.00
 15 41 9 -0.22 0.00
 8 42 9 -5.29 0.00
 10 42 9 -5.36 0.00
 12 42 9 -2.67 0.00
 14 42 9 -5.06 0.00
 7 43 9 -0.11 0.00
 9 43 9 0.85 0.00
 11 43 9 3.47 0.00
 13 43 9 -1.74 0.00
 4 44 9 1.26 0.00
 6 44 9 -0.24 0.00
 8 44 9 -2.33 0.00
 10 44 9 -1.99 0.00
 12 44 9 1.36 0.00
 1 45 9 0.78 0.00
 3 45 9 -1.96 0.00
 5 45 9 0.14 0.00
 7 45 9 -3.98 0.00
 9 45 9 -0.92 0.00
 11 45 9 -1.07 0.00
 0 46 9 5.56 0.00
 2 46 9 -2.39 0.00
 4 46 9 -1.81 0.00
 6 46 9 -0.16 0.00
 8 46 9 -0.56 0.00
 10 46 9 -0.97 0.00
 1 47 9 -2.66 0.00
 3 47 9 -1.99 0.00
 5 47 9 3.48 0.00
 7 47 9 -1.75 0.00
 9 47 9 1.18 0.00
 0 48 9 3.41 0.00
 2 48 9 -0.23 0.00
 4 48 9 0.51 0.00
 6 48 9 2.88 0.00
 8 48 9 3.63 0.00
 1 49 9 -0.29 0.00
 3 49 9 1.13 0.00
 5 49 9 2.00 0.00
 7 49 9 -2.70 0.00
 14 0 10 9.41 0.00
 22 0 10 6.61 0.00
 21 1 10 0.75 0.00
 23 1 10 0.66 0.00
 22 2 10 4.35 0.00
 21 3 10 2.84 0.00
 23 3 10 0.48 0.00
 22 4 10 -0.15 0.00
 21 5 10 -0.61 0.00
 23 5 10 -0.67 0.00
 22 6 10 -5.31 0.00
 21 7 10 -2.95 0.00
 23 7 10 -3.75 0.00
 22 8 10 -1.20 0.00
 21 9 10 3.17 0.00
 23 9 10 0.36 0.00
 20 10 10 0.20 0.00
 22 10 10 -1.71 0.00
 21 11 10 -0.28 0.00
 23 11 10 -4.04 0.00
 20 12 10 -6.61 0.00
 22 12 10 -2.07 0.00
 21 13 10 3.17 0.00
 23 13 10 3.22 0.00
 20 14 10 1.27 0.00
 22 14 10 8.23 0.00
 21 15 10 -2.10 0.00
 23 15 10 2.17 0.00
 20 16 10 -3.76 0.00
 22 16 10 3.00 0.00
 21 17 10 -5.87 0.00
 20 18 10 3.39 0.00
 22 18 10 9.11 0.00
 19 19 10 0.44 0.00
 21 19 10 2.75 0.00
 20 20 10 -1.28 0.00
 22 20 10 5.27 0.00
 19 21 10 -0.74 0.00
 21 21 10 0.07 0.00
 18 22 10 -0.69 0.00
 20 22 10 0.48 0.00
 19 23 10 3.15 0.00
 21 23 10 -3.62 0.00
 18 24 10 0.39 0.00
 20 24 10 0.60 0.00
 17 25 10 -2.70 0.00
 19 25 10 4.32 0.00
 21 25 10 -2.66 0.00
 18 26 10 -3.96 0.00
 20 26 10 -1.43 0.00
 17 27 10 2.07 0.00
 19 27 10 1.64 0.00
 16 28 10 -0.02 0.00
 18 28 10 -3.80 0.00
 20 28 10 -2.56 0.00
 15 29 10 -0.88 0.00
 17 29 10 10.24 0.00
 19 29 10 6.91 0.00
 16 30 10 -3.87 0.00
 18 30 10 -1.36 0.00
 15 31 10 -5.14 0.00
 17 31 10 2.29 0.00
 19 31 10 0.41 0.00
 14 32 10 1.71 0.00
 16 32 10 -0.32 0.00
 18 32 10 0.81 0.00
 13 33 10 0.42 0.00
 15 33 10 -0.55 0.00
 17 33 10 -0.21 0.00
 14 34 10 1.52 0.00
 16 34 10 1.59 0.00
 13 35 10 -2.53 0.00
 15 35 10 0.17 0.00
 17 35 10 -2.40 0.00
 12 36 10 2.19 0.00
 14 36 10 3.99 0.00
 16 36 10 2.87 0.00
 11 37 10 4.23 0.00
 13 37 10 8.77 0.00
 15 37 10 5.24 0.00
 10 38 10 3.74 0.00
 12 38 10 6.16 0.00
 14 38 10 7.10 0.00
 9 39 10 1.13 0.00
 11 39 10 1.26 0.00
 13 39 10 -1.83 0.00
 15 39 10 -0.95 0.00
 8 40 10 4.45 0.00
 10 40 10 6.72 0.00
 12 40 10 -1.84 0.00
 14 40 10 1.47 0.00
 7 41 10 -3.18 0.00
 9 41 10 -0.10 0.00
 11 41 10 -1.98 0.00
 13 41 10 -4.39 0.00
 6 42 10 -6.24 0.00
 8 42 10 0.80 0.00
 10 42 10 2.98 0.00
 12 42 10 -1.41 0.00
 5 43 10 -2.20 0.00
 7 43 10 -4.32 0.00
 9 43 10 -3.07 0.00
 11 43 10 -2.34 0.00
 0 44 10 4.50 0.00
 2 44 10 -3.42 0.00
 4 44 10 1.34 0.00
 6 44 10 -1.23 0.00
 8 44 10 -0.45 0.00
 10 44 10 1.52 0.00
 1 45 10 -0.32 0.00
 3 45 10 -3.37 0.00
 5 45 10 -2.80 0.00
 7 45 10 -0.47 0.00
 9 45 10 -3.42 0.00
 11 45 10 -1.84 0.00
 0 46 10 0.98 0.00
 2 46 10 -3.38 0.00
 4 46 10 -3.74 0.00
 6 46 10 3.09 0.00
 8 46 10 -4.29 0.00
 10 46 10 -1.47 0.00
 1 47 10 6.77 0.00
 3 47 10 -1.95 0.00
 5 47 10 1.18 0.00
 7 47 10 3.05 0.00
 0 48 10 4.79 0.00
 2 48 10 5.58 0.00
 4 48 10 1.30 0.00
 6 48 10 5.74 0.00
 1 49 10 3.12 0.00
 3 49 10 -1.56 0.00
 5 49 10 1.91 0.00
 20 0 11 11.80 0.00
 22 0 11 -3.07 0.00
 21 1 11 -2.74 0.00
 23 1 11 1.87 0.00
 20 2 11 5.43 0.00
 22 2 11 -4.22 0.00
 21 3 11 -3.66 0.00
 23 3 11 -4.13 0.00
 20 4 11 5.06 0.00
 22 4 11 -2.37 0.00
 21 5 11 2.39 0.00
 23 5 11 -3.64 0.00
 20 6 11 3.48 0.00
 22 6 11 -0.87 0.00
 21 7 11 4.32 0.00
 23 7 11 -3.43 0.00
 20 8 11 1.10 0.00
 22 8 11 -8.32 0.00
 21 9 11 -4.59 0.00
 23 9 11 -4.46 0.00
 20 10 11 -1.20 0.00
 22 10 11 -8.26 0.00
 21 11 11 3.04 0.00
 23 11 11 -1.53 0.00
 20 12 11 8.47 0.00
 22 12 11 3.00 0.00
 21 13 11 2.46 0.00
 20 14 11 6.55 0.00
 22 14 11 0.25 0.00
 19 15 11 6.38 0.00
 21 15 11 4.14 0.00
 20 16 11 7.12 0.00
 22 16 11 -4.30 0.00
 19 17 11 6.89 0.00
 21 17 11 3.45 0.00
 20 18 11 7.82 0.00
 22 18 11 -5.84 0.00
 19 19 11 4.36 0.00
 21 19 11 3.80 0.00
 18 20 11 -2.43 0.00
 20 20 11 2.38 0.00
 19 21 11 0.95 0.00
 21 21 11 2.45 0.00
 18 22 11 4.13 0.00
 20 22 11 2.36 0.00
 17 23 11 1.48 0.00
 19 23 11 -0.40 0.00
 18 24 11 -0.46 0.00
 20 24 11 -2.53 0.00
 17 25 11 -7.38 0.00
 19 25 11 -7.19 0.00
 16 26 11 -0.61 0.00
 18 26 11 4.27 0.00
 20 26 11 -1.70 0.00
 15 27 11 1.88 0.00
 17 27 11 -5.68 0.00
 19 27 11 -3.66 0.00
 16 28 11 -0.38 0.00
 18 28 11 6.83 0.00
 15 29 11 2.40 0.00
 17 29 11 -2.74 0.00
 19 29 11 -1.18 0.00
 14 30 11 -3.60 0.00
 16 30 11 -2.02 0.00
 18 30 11 5.35 0.00
 13 31 11 -1.09 0.00
 15 31 11 -0.64 0.00
 17 31 11 1.49 0.00
 14 32 11 -8.27 0.00
 16 32 11 -6.13 0.00
 18 32 11 -1.29 0.00
 13 33 11 -2.15 0.00
 15 33 11 -3.93 0.00
 17 33 11 3.92 0.00
 12 34 11 1.13 0.00
 14 34 11 -0.42 0.00
 16 34 11 -0.34 0.00
 11 35 11 -7.55 0.00
 13 35 11 -1.23 0.00
 15 35 11 -0.63 0.00
 10 36 11 -1.21 0.00
 12 36 11 -0.26 0.00
 14 36 11 2.73 0.00
 16 36 11 -2.06 0.00
 9 37 11 5.50 0.00
 11 37 11 -2.79 0.00
 13 37 11 4.16 0.00
 15 37 11 -0.47 0.00
 10 38 11 -0.45 0.00
 12 38 11 2.04 0.00
 14 38 11 3.09 0.00
 9 39 11 0.09 0.00
 11 39 11 -2.47 0.00
 13 39 11 1.16 0.00
 8 40 11 2.46 0.00
 10 40 11 -2.47 0.00
 12 40 11 1.08 0.00
 5 41 11 0.84 0.00
 7 41 11 6.87 0.00
 9 41 11 3.48 0.00
 11 41 11 5.02 0.00
 13 41 11 -0.13 0.00
 2 42 11 3.24 0.00
 4 42 11 3.17 0.00
 6 42 11 6.66 0.00
 8 42 11 5.98 0.00
 10 42 11 -0.56 0.00
 12 42 11 3.98 0.00
 1 43 11 1.36 0.00
 3 43 11 -2.57 0.00
 5 43 11 -1.66 0.00
 7 43 11 1.54 0.00
 9 43 11 -1.64 0.00
 11 43 11 3.09 0.00
 0 44 11 4.01 0.00
 2 44 11 -3.42 0.00
 4 44 11 -3.15 0.00
 6 44 11 -4.05 0.00
 8 44 11 -4.29 0.00
 10 44 11 -5.85 0.00
 1 45 11 -0.90 0.00
 3 45 11 -7.65 0.00
 5 45 11 -0.01 0.00
 7 45 11 -0.17 0.00
 9 45 11 -3.07 0.00
 0 46 11 5.54 0.00
 2 46 11 -3.94 0.00
 4 46 11 -1.50 0.00
 6 46 11 1.58 0.00
 8 46 11 2.46 0.00
 1 47 11 4.88 0.00
 3 47 11 0.14 0.00
 5 47 11 6.01 0.00
 7 47 11 3.30 0.00
 0 48 11 3.40 0.00
 2 48 11 0.03 0.00
 4 48 11 -1.42 0.00
 1 49 11 0.29 0.00
 20 0 12 -4.13 0.00
 22 0 12 -5.70 0.00
 19 1 12 -0.59 0.00
 21 1 12 -2.94 0.00
 23 1 12 -6.19 0.00
 20 2 12 -9.18 0.00
 22 2 12 -10.34 0.00
 19 3 12 5.33 0.00
 21 3 12 -0.90 0.00
 23 3 12 -2.91 0.00
 20 4 12 10.39 0.00
 22 4 12 -4.07 0.00
 19 5 12 8.45 0.00
 21 5 12 -0.40 0.00
 20 6 12 2.65 0.00
 22 6 12 -9.06 0.00
 19 7 12 3.63 0.00
 21 7 12 -0.96 0.00
 20 8 12 12.85 0.00
 22 8 12 0.14 0.00
 19 9 12 2.16 0.00
 21 9 12 3.22 0.00
 20 10 12 7.39 0.00
 22 10 12 -1.70 0.00
 11 11 12 3.80 0.00
 19 11 12 5.81 0.00
 21 11 12 1.69 0.00
 20 12 12 6.44 0.00
 22 12 12 3.01 0.00
 19 13 12 8.50 0.00
 21 13 12 2.12 0.00
 20 14 12 8.57 0.00
 22 14 12 3.07 0.00
 19 15 12 11.87 0.00
 21 15 12 -1.19 0.00
 18 16 12 -3.63 0.00
 20 16 12 -0.31 0.00
 19 17 12 -1.32 0.00
 21 17 12 -7.22 0.00
 18 18 12 2.44 0.00
 20 18 12 3.83 0.00
 19 19 12 2.12 0.00
 21 19 12 0.44 0.00
 18 20 12 -0.35 0.00
 20 20 12 4.26 0.00
 17 21 12 -2.73 0.00
 19 21 12 -0.34 0.00
 16 22 12 3.33 0.00
 18 22 12 -1.00 0.00
 20 22 12 3.31 0.00
 17 23 12 3.01 0.00
 19 23 12 4.19 0.00
 16 24 12 3.70 0.00
 18 24 12 -0.69 0.00
 15 25 12 0.44 0.00
 17 25 12 5.29 0.00
 19 25 12 3.08 0.00
 14 26 12 -7.62 0.00
 16 26 12 -2.18 0.00
 18 26 12 -8.86 0.00
 15 27 12 -3.41 0.00
 17 27 12 5.27 0.00
 19 27 12 0.18 0.00
 14 28 12 0.77 0.00
 16 28 12 8.33 0.00
 18 28 12 -3.16 0.00
 13 29 12 -1.26 0.00
 15 29 12 -10.74 0.00
 17 29 12 1.84 0.00
 12 30 12 4.95 0.00
 14 30 12 -5.21 0.00
 16 30 12 1.09 0.00
 13 31 12 -2.02 0.00
 15 31 12 -7.21 0.00
 17 31 12 -0.05 0.00
 12 32 12 5.83 0.00
 14 32 12 -1.56 0.00
 16 32 12 5.60 0.00
 11 33 12 8.32 0.00
 13 33 12 -4.72 0.00
 15 33 12 -3.38 0.00
 12 34 12 -3.37 0.00
 14 34 12 -12.22 0.00
 16 34 12 -2.15 0.00
 11 35 12 2.07 0.00
 13 35 12 -1.76 0.00
 15 35 12 -1.36 0.00
 10 36 12 -9.45 0.00
 12 36 12 1.44 0.00
 14 36 12 -5.09 0.00
 9 37 12 -7.21 0.00
 11 37 12 -1.42 0.00
 13 37 12 3.12 0.00
 8 38 12 4.82 0.00
 10 38 12 -5.76 0.00
 12 38 12 -1.68 0.00
 14 38 12 -3.19 0.00
 7 39 12 9.51 0.00
 9 39 12 6.16 0.00
 11 39 12 0.86 0.00
 13 39 12 -1.59 0.00
 4 40 12 6.59 0.00
 6 40 12 -1.08 0.00
 8 40 12 6.70 0.00
 10 40 12 1.17 0.00
 12 40 12 -3.87 0.00
 1 41 12 5.90 0.00
 3 41 12 5.34 0.00
 5 41 12 7.90 0.00
 7 41 12 3.00 0.00
 9 41 12 4.53 0.00
 11 41 12 -0.38 0.00
 0 42 12 2.92 0.00
 2 42 12 -4.93 0.00
 4 42 12 6.12 0.00
 6 42 12 -4.80 0.00
 8 42 12 3.91 0.00
 10 42 12 2.46 0.00
 1 43 12 -1.09 0.00
 3 43 12 0.45 0.00
 5 43 12 3.31 0.00
 7 43 12 1.75 0.00
 9 43 12 3.28 0.00
 0 44 12 4.36 0.00
 2 44 12 -8.10 0.00
 4 44 12 1.57 0.00
 6 44 12 -0.99 0.00
 8 44 12 1.32 0.00
 1 45 12 4.08 0.00
 3 45 12 0.17 0.00
 5 45 12 1.65 0.00
 7 45 12 0.48 0.00
 0 46 12 5.02 0.00
 2 46 12 -2.01 0.00
 4 46 12 0.90 0.00
 6 46 12 4.81 0.00
 1 47 12 -0.96 0.00
 3 47 12 -6.46 0.00
 18 0 13 8.30 0.00
 20 0 13 1.09 0.00
 22 0 13 -2.45 0.00
 19 1 13 -1.87 0.00
 21 1 13 -12.28 0.00
 20 2 13 -8.95 0.00
 22 2 13 -6.69 0.00
 19 3 13 -1.49 0.00
 21 3 13 -10.59 0.00
 20 4 13 2.45 0.00
 22 4 13 1.38 0.00
 19 5 13 3.78 0.00
 21 5 13 -0.11 0.00
 20 6 13 1.25 0.00
 22 6 13 2.46 0.00
 19 7 13 1.37 0.00
 21 7 13 2.62 0.00
 20 8 13 3.00 0.00
 19 9 13 -1.20 0.00
 21 9 13 4.67 0.00
 18 10 13 5.40 0.00
 20 10 13 3.08 0.00
 19 11 13 6.40 0.00
 21 11 13 11.22 0.00
 18 12 13 1.47 0.00
 20 12 13 1.22 0.00
 19 13 13 -4.12 0.00
 21 13 13 3.92 0.00
 18 14 13 -1.79 0.00
 20 14 13 -0.48 0.00
 19 15 13 1.61 0.00
 21 15 13 4.19 0.00
 18 16 13 -8.88 0.00
 20 16 13 -2.41 0.00
 17 17 13 -6.91 0.00
 19 17 13 -1.36 0.00
 18 18 13 -3.89 0.00
 20 18 13 0.22 0.00
 17 19 13 1.19 0.00
 19 19 13 0.97 0.00
 16 20 13 -7.83 0.00
 18 20 13 -4.78 0.00
 20 20 13 -1.99 0.00
 17 21 13 2.25 0.00
 19 21 13 -0.20 0.00
 16 22 13 0.20 0.00
 18 22 13 3.78 0.00
 15 23 13 0.87 0.00
 17 23 13 1.65 0.00
 19 23 13 0.55 0.00
 14 24 13 5.23 0.00
 16 24 13 7.10 0.00
 18 24 13 3.61 0.00
 15 25 13 -1.61 0.00
 17 25 13 -2.09 0.00
 14 26 13 -5.42 0.00
 16 26 13 2.75 0.00
 18 26 13 2.16 0.00
 13 27 13 0.91 0.00
 15 27 13 0.55 0.00
 17 27 13 -0.81 0.00
 12 28 13 5.62 0.00
 14 28 13 -3.26 0.00
 16 28 13 0.53 0.00
 13 29 13 10.52 0.00
 15 29 13 4.84 0.00
 17 29 13 3.40 0.00
 12 30 13 2.62 0.00
 14 30 13 -5.55 0.00
 16 30 13 -4.08 0.00
 11 31 13 1.37 0.00
 13 31 13 1.87 0.00
 15 31 13 -2.05 0.00
 12 32 13 3.62 0.00
 14 32 13 -3.09 0.00
 16 32 13 -3.14 0.00
 11 33 13 3.14 0.00
 13 33 13 -4.25 0.00
 15 33 13 -4.98 0.00
 10 34 13 4.04 0.00
 12 34 13 -0.46 0.00
 14 34 13 0.90 0.00
 9 35 13 0.43 0.00
 11 35 13 -5.17 0.00
 13 35 13 -3.97 0.00
 8 36 13 -1.12 0.00
 10 36 13 4.51 0.00
 12 36 13 -1.43 0.00
 14 36 13 3.04 0.00
 7 37 13 -3.35 0.00
 9 37 13 2.65 0.00
 11 37 13 -10.23 0.00
 13 37 13 -2.48 0.00
 4 38 13 0.47 0.00
 6 38 13 2.32 0.00
 8 38 13 -1.97 0.00
 10 38 13 0.05 0.00
 12 38 13 -4.53 0.00
 1 39 13 0.58 0.00
 3 39 13 3.16 0.00
 5 39 13 4.70 0.00
 7 39 13 -3.51 0.00
 9 39 13 3.22 0.00
 11 39 13 -6.31 0.00
 0 40 13 -7.63 0.00
 2 40 13 -2.33 0.00
 4 40 13 -2.42 0.00
 6 40 13 7.54 0.00
 8 40 13 5.53 0.00
 10 40 13 3.94 0.00
 1 41 13 -0.34 0.00
 3 41 13 0.48 0.00
 5 41 13 2.99 0.00
 7 41 13 -0.57 0.00
 9 41 13 3.43 0.00
 0 42 13 -0.63 0.00
 2 42 13 1.30 0.00
 4 42 13 2.96 0.00
 6 42 13 5.67 0.00
 8 42 13 1.95 0.00
 1 43 13 -1.75 0.00
 3 43 13 -1.76 0.00
 5 43 13 1.06 0.00
 7 43 13 -1.68 0.00
 0 44 13 3.45 0.00
 2 44 13 -1.61 0.00
 4 44 13 3.56 0.00
 6 44 13 0.76 0.00
 1 45 13 -0.13 0.00
 3 45 13 -2.38 0.00
 5 45 13 1.76 0.00
 0 46 13 4.02 0.00
 2 46 13 -2.46 0.00
 18 0 14 5.39 0.00
 20 0 14 -10.36 0.00
 17 1 14 7.30 0.00
 19 1 14 -8.04 0.00
 21 1 14 3.52 0.00
 18 2 14 2.19 0.00
 20 2 14 -10.76 0.00
 19 3 14 -1.69 0.00
 21 3 14 -0.16 0.00
 18 4 14 6.24 0.00
 20 4 14 -5.01 0.00
 19 5 14 1.94 0.00
 21 5 14 -0.73 0.00
 18 6 14 -6.12 0.00
 20 6 14 -6.36 0.00
 19 7 14 0.24 0.00
 21 7 14 0.11 0.00
 18 8 14 -2.91 0.00
 20 8 14 1.68 0.00
 17 9 14 -0.49 0.00
 19 9 14 -1.67 0.00
 21 9 14 3.56 0.00
 18 10 14 -0.80 0.00
 20 10 14 2.84 0.00
 17 11 14 4.61 0.00
 19 11 14 -0.77 0.00
 18 12 14 1.39 0.00
 20 12 14 1.36 0.00
 17 13 14 -6.78 0.00
 19 13 14 -4.68 0.00
 18 14 14 -2.67 0.00
 20 14 14 -0.23 0.00
 17 15 14 -8.30 0.00
 19 15 14 -1.47 0.00
 16 16 14 -2.85 0.00
 18 16 14 -2.25 0.00
 20 16 14 0.13 0.00
 17 17 14 -10.19 0.00
 19 17 14 -4.97 0.00
 16 18 14 0.01 0.00
 18 18 14 0.70 0.00
 15 19 14 -8.91 0.00
 17 19 14 -3.46 0.00
 19 19 14 -1.84 0.00
 16 20 14 0.29 0.00
 18 20 14 -0.76 0.00
 15 21 14 -6.77 0.00
 17 21 14 -2.66 0.00
 14 22 14 -1.92 0.00
 16 22 14 -4.18 0.00
 18 22 14 -1.21 0.00
 15 23 14 2.75 0.00
 17 23 14 5.65 0.00
 14 24 14 -2.98 0.00
 16 24 14 -3.62 0.00
 18 24 14 2.26 0.00
 13 25 14 1.94 0.00
 15 25 14 0.39 0.00
 17 25 14 4.57 0.00
 12 26 14 -2.26 0.00
 14 26 14 0.28 0.00
 16 26 14 -3.22 0.00
 11 27 14 -3.55 0.00
 13 27 14 5.87 0.00
 15 27 14 -1.88 0.00
 17 27 14 3.32 0.00
 12 28 14 1.29 0.00
 14 28 14 8.90 0.00
 16 28 14 3.24 0.00
 11 29 14 -0.54 0.00
 13 29 14 5.69 0.00
 15 29 14 -5.19 0.00
 10 30 14 6.00 0.00
 12 30 14 1.97 0.00
 14 30 14 5.86 0.00
 11 31 14 1.71 0.00
 13 31 14 0.68 0.00
 15 31 14 -1.23 0.00
 10 32 14 1.92 0.00
 12 32 14 -4.14 0.00
 14 32 14 0.36 0.00
 9 33 14 6.74 0.00
 11 33 14 6.43 0.00
 13 33 14 -0.11 0.00
 8 34 14 4.13 0.00
 10 34 14 1.17 0.00
 12 34 14 -1.30 0.00
 7 35 14 -2.24 0.00
 9 35 14 1.73 0.00
 11 35 14 2.25 0.00
 13 35 14 1.47 0.00
 0 36 14 3.19 0.00
 4 36 14 -1.64 0.00
 6 36 14 -1.82 0.00
 8 36 14 -1.91 0.00
 10 36 14 -5.39 0.00
 12 36 14 -0.06 0.00
 1 37 14 3.01 0.00
 3 37 14 3.09 0.00
 5 37 14 -3.90 0.00
 7 37 14 0.81 0.00
 9 37 14 0.77 0.00
 11 37 14 0.39 0.00
 0 38 14 12.35 0.00
 2 38 14 8.99 0.00
 4 38 14 2.95 0.00
 6 38 14 1.29 0.00
 8 38 14 -2.24 0.00
 10 38 14 -2.87 0.00
 1 39 14 -5.18 0.00
 3 39 14 -3.25 0.00
 5 39 14 -3.24 0.00
 7 39 14 1.12 0.00
 9 39 14 -0.66 0.00
 0 40 14 -4.17 0.00
 2 40 14 -1.30 0.00
 4 40 14 0.63 0.00
 6 40 14 -2.92 0.00
 8 40 14 -2.53 0.00
 1 41 14 -9.40 0.00
 3 41 14 -2.19 0.00
 5 41 14 -0.71 0.00
 7 41 14 1.83 0.00
 0 42 14 1.81 0.00
 2 42 14 1.35 0.00
 4 42 14 3.34 0.00
 6 42 14 -3.22 0.00
 1 43 14 -1.33 0.00
 3 43 14 2.44 0.00
 5 43 14 -2.53 0.00
 0 44 14 -0.10 0.00
 2 44 14 -2.01 0.00
 16 0 15 7.79 0.00
 18 0 15 -0.97 0.00
 20 0 15 4.17 0.00
 17 1 15 7.94 0.00
 19 1 15 0.24 0.00
 16 2 15 9.26 0.00
 18 2 15 -3.51 0.00
 20 2 15 3.84 0.00
 17 3 15 2.73 0.00
 19 3 15 -1.30 0.00
 16 4 15 14.35 0.00
 18 4 15 -1.71 0.00
 20 4 15 4.23 0.00
 17 5 15 -5.45 0.00
 19 5 15 -2.30 0.00
 16 6 15 9.93 0.00
 18 6 15 -3.52 0.00
 20 6 15 2.94 0.00
 17 7 15 -13.47 0.00
 19 7 15 -3.46 0.00
 16 8 15 -0.17 0.00
 18 8 15 -3.08 0.00
 20 8 15 0.85 0.00
 17 9 15 -6.71 0.00
 19 9 15 -2.01 0.00
 16 10 15 -2.51 0.00
 18 10 15 0.82 0.00
 20 10 15 1.02 0.00
 17 11 15 4.98 0.00
 19 11 15 3.64 0.00
 16 12 15 -3.83 0.00
 18 12 15 -2.26 0.00
 17 13 15 -0.86 0.00
 19 13 15 -1.23 0.00
 16 14 15 0.02 0.00
 18 14 15 -5.24 0.00
 15 15 15 6.59 0.00
 17 15 15 -1.94 0.00
 19 15 15 3.26 0.00
 16 16 15 -3.89 0.00
 18 16 15 -5.12 0.00
 15 17 15 8.15 0.00
 17 17 15 -4.66 0.00
 14 18 15 -5.14 0.00
 16 18 15 -6.75 0.00
 18 18 15 -3.66 0.00
 15 19 15 5.15 0.00
 17 19 15 -3.93 0.00
 14 20 15 -4.42 0.00
 16 20 15 -5.07 0.00
 18 20 15 -1.44 0.00
 13 21 15 -5.58 0.00
 15 21 15 -2.05 0.00
 17 21 15 -2.10 0.00
 14 22 15 0.52 0.00
 16 22 15 -0.64 0.00
 13 23 15 -6.48 0.00
 15 23 15 -4.06 0.00
 17 23 15 -3.36 0.00
 12 24 15 0.91 0.00
 14 24 15 7.47 0.00
 16 24 15 3.94 0.00
 11 25 15 0.39 0.00
 13 25 15 -5.38 0.00
 15 25 15 -1.05 0.00
 10 26 15 -2.59 0.00
 12 26 15 1.43 0.00
 14 26 15 -1.22 0.00
 16 26 15 1.14 0.00
 11 27 15 -1.22 0.00
 13 27 15 2.02 0.00
 15 27 15 1.60 0.00
 10 28 15 -4.42 0.00
 12 28 15 6.73 0.00
 14 28 15 -0.51 0.00
 9 29 15 3.08 0.00
 11 29 15 -1.32 0.00
 13 29 15 5.86 0.00
 15 29 15 2.00 0.00
 10 30 15 -0.76 0.00
 12 30 15 1.74 0.00
 14 30 15 -1.85 0.00
 9 31 15 -3.53 0.00
 11 31 15 -3.29 0.00
 13 31 15 -2.10 0.00
 6 32 15 -7.57 0.00
 8 32 15 -1.00 0.00
 10 32 15 -0.72 0.00
 12 32 15 -0.64 0.00
 5 33 15 0.66 0.00
 7 33 15 5.85 0.00
 9 33 15 -1.17 0.00
 11 33 15 5.14 0.00
 13 33 15 -2.18 0.00
 0 34 15 -1.87 0.00
 2 34 15 0.87 0.00
 4 34 15 4.70 0.00
 6 34 15 -0.88 0.00
 8 34 15 8.60 0.00
 10 34 15 8.10 0.00
 12 34 15 1.17 0.00
 1 35 15 -1.81 0.00
 3 35 15 -7.52 0.00
 5 35 15 -3.92 0.00
 7 35 15 1.61 0.00
 9 35 15 -3.16 0.00
 11 35 15 1.71 0.00
 0 36 15 -0.76 0.00
 2 36 15 1.02 0.00
 4 36 15 -2.48 0.00
 6 36 15 -8.29 0.00
 8 36 15 -0.71 0.00
 10 36 15 1.37 0.00
 1 37 15 7.66 0.00
 3 37 15 -0.15 0.00
 5 37 15 1.49 0.00
 7 37 15 -0.96 0.00
 9 37 15 -1.36 0.00
 0 38 15 -6.31 0.00
 2 38 15 4.02 0.00
 4 38 15 -1.46 0.00
 6 38 15 1.36 0.00
 8 38 15 1.08 0.00
 1 39 15 3.19 0.00
 3 39 15 -1.77 0.00
 5 39 15 1.66 0.00
 7 39 15 -3.96 0.00
 0 40 15 -7.70 0.00
 2 40 15 2.49 0.00
 4 40 15 -8.04 0.00
 6 40 15 1.12 0.00
 1 41 15 7.24 0.00
 3 41 15 1.36 0.00
 5 41 15 2.11 0.00
 0 42 15 -6.75 0.00
 2 42 15 -0.37 0.00
 4 42 15 -4.56 0.00
 16 0 16 14.20 0.00
 18 0 16 5.24 0.00
 15 1 16 4.92 0.00
 17 1 16 4.56 0.00
 19 1 16 -2.04 0.00
 16 2 16 7.50 0.00
 18 2 16 2.62 0.00
 15 3 16 4.87 0.00
 17 3 16 3.41 0.00
 19 3 16 1.68 0.00
 16 4 16 -1.42 0.00
 18 4 16 2.02 0.00
 15 5 16 9.76 0.00
 17 5 16 3.57 0.00
 19 5 16 7.74 0.00
 16 6 16 -8.62 0.00
 18 6 16 -6.36 0.00
 15 7 16 5.93 0.00
 17 7 16 -2.47 0.00
 19 7 16 4.26 0.00
 16 8 16 -8.87 0.00
 18 8 16 -4.31 0.00
 15 9 16 -2.07 0.00
 17 9 16 -1.12 0.00
 19 9 16 3.66 0.00
 16 10 16 -5.40 0.00
 18 10 16 0.55 0.00
 15 11 16 -7.75 0.00
 17 11 16 -2.62 0.00
 16 12 16 2.10 0.00
 18 12 16 3.79 0.00
 15 13 16 2.87 0.00
 17 13 16 2.00 0.00
 14 14 16 4.64 0.00
 16 14 16 4.17 0.00
 18 14 16 4.47 0.00
 15 15 16 0.69 0.00
 17 15 16 -5.52 0.00
 14 16 16 6.17 0.00
 16 16 16 1.65 0.00
 18 16 16 -0.62 0.00
 13 17 16 -2.34 0.00
 15 17 16 3.79 0.00
 17 17 16 -2.56 0.00
 14 18 16 3.17 0.00
 16 18 16 3.27 0.00
 13 19 16 -9.11 0.00
 15 19 16 -4.44 0.00
 17 19 16 -4.38 0.00
 12 20 16 -3.26 0.00
 14 20 16 -4.20 0.00
 16 20 16 -0.78 0.00
 11 21 16 -5.50 0.00
 13 21 16 -5.17 0.00
 15 21 16 2.96 0.00
 12 22 16 -5.06 0.00
 14 22 16 -7.93 0.00
 16 22 16 -1.32 0.00
 11 23 16 6.16 0.00
 13 23 16 -2.02 0.00
 15 23 16 9.61 0.00
 10 24 16 2.85 0.00
 12 24 16 -0.82 0.00
 14 24 16 -2.65 0.00
 9 25 16 -12.02 0.00
 11 25 16 1.68 0.00
 13 25 16 -4.90 0.00
 15 25 16 6.71 0.00
 8 26 16 -2.17 0.00
 10 26 16 -3.22 0.00
 12 26 16 -6.50 0.00
 14 26 16 -2.93 0.00
 9 27 16 -2.96 0.00
 11 27 16 1.59 0.00
 13 27 16 0.32 0.00
 8 28 16 -4.24 0.00
 10 28 16 0.36 0.00
 12 28 16 -0.38 0.00
 14 28 16 3.70 0.00
 7 29 16 -3.88 0.00
 9 29 16 -2.43 0.00
 11 29 16 -4.26 0.00
 13 29 16 -0.73 0.00
 0 30 16 1.92 0.00
 6 30 16 5.72 0.00
 8 30 16 -2.98 0.00
 10 30 16 -0.69 0.00
 12 30 16 -4.76 0.00
 1 31 16 -5.28 0.00
 3 31 16 -5.07 0.00
 5 31 16 -0.42 0.00
 7 31 16 -2.05 0.00
 9 31 16 2.62 0.00
 11 31 16 -0.42 0.00
 0 32 16 2.46 0.00
 2 32 16 -1.24 0.00
 4 32 16 -4.51 0.00
 6 32 16 0.97 0.00
 8 32 16 -1.46 0.00
 10 32 16 -1.38 0.00
 12 32 16 -1.26 0.00
 1 33 16 -3.70 0.00
 3 33 16 -1.81 0.00
 5 33 16 -4.39 0.00
 7 33 16 -2.69 0.00
 9 33 16 1.50 0.00
 11 33 16 -2.33 0.00
 0 34 16 0.86 0.00
 2 34 16 -7.51 0.00
 4 34 16 -2.38 0.00
 6 34 16 3.53 0.00
 8 34 16 4.26 0.00
 10 34 16 -2.70 0.00
 1 35 16 -9.11 0.00
 3 35 16 2.46 0.00
 5 35 16 -2.81 0.00
 7 35 16 2.86 0.00
 9 35 16 4.01 0.00
 0 36 16 4.54 0.00
 2 36 16 -7.40 0.00
 4 36 16 -3.17 0.00
 6 36 16 3.56 0.00
 8 36 16 1.69 0.00
 1 37 16 2.78 0.00
 3 37 16 5.14 0.00
 5 37 16 -2.89 0.00
 7 37 16 4.00 0.00
 0 38 16 7.85 0.00
 2 38 16 -1.94 0.00
 4 38 16 -1.65 0.00
 6 38 16 2.21 0.00
 1 39 16 -0.51 0.00
 3 39 16 0.09 0.00
 5 39 16 -2.01 0.00
 0 40 16 4.37 0.00
 2 40 16 0.90 0.00
 14 0 17 4.12 0.00
 16 0 17 -4.41 0.00
 18 0 17 -0.36 0.00
 13 1 17 -1.00 0.00
 15 1 17 0.81 0.00
 17 1 17 8.94 0.00
 14 2 17 3.95 0.00
 16 2 17 0.08 0.00
 18 2 17 2.74 0.00
 15 3 17 -2.41 0.00
 17 3 17 2.55 0.00
 14 4 17 3.60 0.00
 16 4 17 0.34 0.00
 18 4 17 0.87 0.00
 15 5 17 3.37 0.00
 17 5 17 0.09 0.00
 14 6 17 9.69 0.00
 16 6 17 9.35 0.00
 18 6 17 8.86 0.00
 15 7 17 -4.12 0.00
 17 7 17 -5.28 0.00
 14 8 17 -3.24 0.00
 16 8 17 -4.00 0.00
 18 8 17 3.84 0.00
 13 9 17 0.63 0.00
 15 9 17 -2.65 0.00
 17 9 17 -0.31 0.00
 14 10 17 2.09 0.00
 16 10 17 -0.47 0.00
 13 11 17 -0.59 0.00
 15 11 17 -6.45 0.00
 17 11 17 6.06 0.00
 14 12 17 -4.14 0.00
 16 12 17 -5.00 0.00
 13 13 17 5.86 0.00
 15 13 17 -3.28 0.00
 17 13 17 5.32 0.00
 12 14 17 0.48 0.00
 14 14 17 0.66 0.00
 16 14 17 3.85 0.00
 13 15 17 2.78 0.00
 15 15 17 3.06 0.00
 12 16 17 -0.37 0.00
 14 16 17 -2.68 0.00
 16 16 17 5.12 0.00
 11 17 17 7.34 0.00
 13 17 17 0.89 0.00
 15 17 17 3.46 0.00
 12 18 17 -7.89 0.00
 14 18 17 -7.54 0.00
 16 18 17 2.22 0.00
 11 19 17 -1.92 0.00
 13 19 17 -3.87 0.00
 15 19 17 -1.67 0.00
 10 20 17 3.82 0.00
 12 20 17 -6.45 0.00
 14 20 17 -0.24 0.00
 9 21 17 1.15 0.00
 11 21 17 -1.29 0.00
 13 21 17 0.12 0.00
 15 21 17 -3.69 0.00
 8 22 17 -2.29 0.00
 10 22 17 1.94 0.00
 12 22 17 -7.95 0.00
 14 22 17 4.65 0.00
 7 23 17 -5.93 0.00
 9 23 17 0.79 0.00
 11 23 17 -3.38 0.00
 13 23 17 -0.91 0.00
 0 24 17 11.59 0.00
 6 24 17 1.08 0.00
 8 24 17 -3.77 0.00
 10 24 17 5.00 0.00
 12 24 17 -1.49 0.00
 14 24 17 9.42 0.00
 5 25 17 -3.43 0.00
 7 25 17 -7.93 0.00
 9 25 17 -1.15 0.00
 11 25 17 -1.10 0.00
 13 25 17 -0.27 0.00
 0 26 17 6.78 0.00
 6 26 17 -6.13 0.00
 8 26 17 -8.45 0.00
 10 26 17 -0.90 0.00
 12 26 17 -2.87 0.00
 1 27 17 8.83 0.00
 3 27 17 0.41 0.00
 5 27 17 -1.82 0.00
 7 27 17 -6.57 0.00
 9 27 17 -4.47 0.00
 11 27 17 -4.69 0.00
 13 27 17 0.27 0.00
 0 28 17 23.16 0.00
 2 28 17 14.48 0.00
 4 28 17 4.94 0.00
 6 28 17 -1.46 0.00
 8 28 17 -5.68 0.00
 10 28 17 -1.89 0.00
 12 28 17 1.79 0.00
 1 29 17 8.51 0.00
 3 29 17 0.47 0.00
 5 29 17 -4.67 0.00
 7 29 17 -3.03 0.00
 9 29 17 -0.99 0.00
 11 29 17 -3.71 0.00
 0 30 17 -0.85 0.00
 2 30 17 0.31 0.00
 4 30 17 -7.50 0.00
 6 30 17 -3.16 0.00
 8 30 17 0.43 0.00
 10 30 17 0.51 0.00
 1 31 17 7.90 0.00
 3 31 17 1.41 0.00
 5 31 17 2.52 0.00
 7 31 17 2.54 0.00
 9 31 17 -0.01 0.00
 0 32 17 -3.59 0.00
 2 32 17 0.07 0.00
 4 32 17 1.63 0.00
 6 32 17 -0.49 0.00
 8 32 17 -1.20 0.00
 10 32 17 -1.36 0.00
 1 33 17 3.18 0.00
 3 33 17 -5.59 0.00
 5 33 17 5.17 0.00
 7 33 17 4.00 0.00
 9 33 17 -1.02 0.00
 0 34 17 -4.04 0.00
 2 34 17 -6.70 0.00
 4 34 17 0.26 0.00
 6 34 17 -2.59 0.00
 8 34 17 1.94 0.00
 1 35 17 3.13 0.00
 3 35 17 -6.85 0.00
 5 35 17 4.56 0.00
 7 35 17 3.75 0.00
 0 36 17 1.02 0.00
 2 36 17 -1.33 0.00
 4 36 17 3.73 0.00
 6 36 17 0.03 0.00
 1 37 17 -3.48 0.00
 3 37 17 -7.47 0.00
 0 38 17 -2.00 0.00
 2 38 17 0.47 0.00
 12 0 18 -15.94 0.00
 14 0 18 -14.70 0.00
 16 0 18 2.68 0.00
 13 1 18 -1.18 0.00
 15 1 18 0.26 0.00
 17 1 18 -1.40 0.00
 12 2 18 -2.19 0.00
 14 2 18 -3.08 0.00
 16 2 18 4.55 0.00
 13 3 18 4.21 0.00
 15 3 18 0.89 0.00
 17 3 18 -1.26 0.00
 12 4 18 -3.21 0.00
 14 4 18 -3.11 0.00
 16 4 18 -2.15 0.00
 13 5 18 -0.68 0.00
 15 5 18 1.83 0.00
 12 6 18 2.84 0.00
 14 6 18 6.51 0.00
 16 6 18 3.30 0.00
 13 7 18 1.81 0.00
 15 7 18 8.89 0.00
 12 8 18 -2.76 0.00
 14 8 18 2.32 0.00
 16 8 18 1.73 0.00
 11 9 18 -2.52 0.00
 13 9 18 -6.97 0.00
 15 9 18 -0.08 0.00
 12 10 18 -5.56 0.00
 14 10 18 -2.05 0.00
 16 10 18 -1.87 0.00
 11 11 18 -0.76 0.00
 13 11 18 -2.26 0.00
 15 11 18 -3.33 0.00
 12 12 18 1.25 0.00
 14 12 18 -0.25 0.00
 16 12 18 -0.66 0.00
 11 13 18 2.45 0.00
 13 13 18 -1.10 0.00
 15 13 18 -0.67 0.00
 10 14 18 5.36 0.00
 12 14 18 4.35 0.00
 14 14 18 -2.22 0.00
 11 15 18 2.96 0.00
 13 15 18 -5.72 0.00
 15 15 18 2.38 0.00
 10 16 18 -0.56 0.00
 12 16 18 4.86 0.00
 14 16 18 -1.98 0.00
 9 17 18 1.21 0.00
 11 17 18 -2.39 0.00
 13 17 18 -7.29 0.00
 15 17 18 2.42 0.00
 8 18 18 1.78 0.00
 10 18 18 -1.49 0.00
 12 18 18 3.90 0.00
 14 18 18 -2.91 0.00
 9 19 18 6.50 0.00
 11 19 18 -6.23 0.00
 13 19 18 -3.69 0.00
 8 20 18 -0.07 0.00
 10 20 18 0.11 0.00
 12 20 18 4.12 0.00
 14 20 18 -2.03 0.00
 5 21 18 7.95 0.00
 7 21 18 -1.61 0.00
 9 21 18 4.33 0.00
 11 21 18 -5.31 0.00
 13 21 18 0.41 0.00
 4 22 18 9.64 0.00
 6 22 18 3.65 0.00
 8 22 18 0.89 0.00
 10 22 18 3.64 0.00
 12 22 18 4.34 0.00
 1 23 18 -3.23 0.00
 3 23 18 -3.34 0.00
 5 23 18 9.28 0.00
 7 23 18 2.72 0.00
 9 23 18 4.53 0.00
 11 23 18 2.84 0.00
 13 23 18 0.93 0.00
 0 24 18 -13.03 0.00
 2 24 18 -12.62 0.00
 4 24 18 -0.93 0.00
 6 24 18 -4.40 0.00
 8 24 18 -2.60 0.00
 10 24 18 1.91 0.00
 12 24 18 1.94 0.00
 1 25 18 -4.55 0.00
 3 25 18 -5.61 0.00
 5 25 18 -0.82 0.00
 7 25 18 -3.75 0.00
 9 25 18 -1.82 0.00
 11 25 18 2.39 0.00
 0 26 18 -6.95 0.00
 2 26 18 -5.07 0.00
 4 26 18 -7.05 0.00
 6 26 18 -8.33 0.00
 8 26 18 -5.53 0.00
 10 26 18 -2.10 0.00
 1 27 18 15.49 0.00
 3 27 18 3.56 0.00
 5 27 18 -4.09 0.00
 7 27 18 -5.98 0.00
 9 27 18 0.11 0.00
 11 27 18 1.25 0.00
 0 28 18 4.27 0.00
 2 28 18 5.55 0.00
 4 28 18 -6.37 0.00
 6 28 18 -3.76 0.00
 8 28 18 -6.91 0.00
 10 28 18 -0.27 0.00
 1 29 18 10.70 0.00
 3 29 18 2.66 0.00
 5 29 18 2.25 0.00
 7 29 18 -1.72 0.00
 9 29 18 3.80 0.00
 0 30 18 9.60 0.00
 2 30 18 6.91 0.00
 4 30 18 -1.88 0.00
 6 30 18 5.18 0.00
 8 30 18 -0.66 0.00
 1 31 18 6.61 0.00
 3 31 18 0.22 0.00
 5 31 18 2.93 0.00
 7 31 18 -1.89 0.00
 0 32 18 10.53 0.00
 2 32 18 3.33 0.00
 4 32 18 -0.27 0.00
 6 32 18 2.19 0.00
 1 33 18 -4.78 0.00
 3 33 18 -4.43 0.00
 5 33 18 -2.73 0.00
 0 34 18 6.34 0.00
 2 34 18 -0.62 0.00
 4 34 18 1.23 0.00
 1 35 18 -1.20 0.00
 3 35 18 4.04 0.00
 10 0 19 4.06 0.00
 12 0 19 -2.39 0.00
 14 0 19 7.39 0.00
 9 1 19 1.00 0.00
 11 1 19 -7.86 0.00
 13 1 19 -10.49 0.00
 15 1 19 -0.57 0.00
 10 2 19 0.14 0.00
 12 2 19 -5.61 0.00
 14 2 19 4.36 0.00
 9 3 19 0.47 0.00
 11 3 19 -6.50 0.00
 13 3 19 -6.27 0.00
 15 3 19 1.20 0.00
 10 4 19 -1.59 0.00
 12 4 19 -5.18 0.00
 14 4 19 3.13 0.00
 9 5 19 6.04 0.00
 11 5 19 2.05 0.00
 13 5 19 1.83 0.00
 15 5 19 5.56 0.00
 10 6 19 2.78 0.00
 12 6 19 -4.40 0.00
 14 6 19 -0.26 0.00
 9 7 19 6.80 0.00
 11 7 19 -1.13 0.00
 13 7 19 -2.14 0.00
 15 7 19 5.52 0.00
 10 8 19 -1.71 0.00
 12 8 19 -11.96 0.00
 14 8 19 -5.94 0.00
 9 9 19 2.44 0.00
 11 9 19 -4.58 0.00
 13 9 19 -5.50 0.00
 15 9 19 3.72 0.00
 10 10 19 0.52 0.00
 12 10 19 -5.50 0.00
 14 10 19 -1.54 0.00
 9 11 19 3.58 0.00
 11 11 19 3.24 0.00
 13 11 19 -2.63 0.00
 8 12 19 4.18 0.00
 10 12 19 7.81 0.00
 12 12 19 -1.55 0.00
 14 12 19 -0.55 0.00
 9 13 19 0.38 0.00
 11 13 19 5.89 0.00
 13 13 19 -2.03 0.00
 8 14 19 -4.29 0.00
 10 14 19 6.34 0.00
 12 14 19 -0.78 0.00
 14 14 19 1.31 0.00
 7 15 19 0.23 0.00
 9 15 19 -6.33 0.00
 11 15 19 6.65 0.00
 13 15 19 -2.26 0.00
 6 16 19 1.09 0.00
 8 16 19 -5.37 0.00
 10 16 19 4.93 0.00
 12 16 19 -3.10 0.00
 5 17 19 5.97 0.00
 7 17 19 3.49 0.00
 9 17 19 -2.42 0.00
 11 17 19 7.29 0.00
 13 17 19 -4.42 0.00
 4 18 19 -6.61 0.00
 6 18 19 -2.29 0.00
 8 18 19 -2.94 0.00
 10 18 19 2.87 0.00
 12 18 19 -2.00 0.00
 1 19 19 2.87 0.00
 3 19 19 1.81 0.00
 5 19 19 4.33 0.00
 7 19 19 2.47 0.00
 9 19 19 1.20 0.00
 11 19 19 6.55 0.00
 0 20 19 -7.55 0.00
 2 20 19 -3.63 0.00
 4 20 19 -2.22 0.00
 6 20 19 -1.74 0.00
 8 20 19 -0.08 0.00
 10 20 19 -1.88 0.00
 12 20 19 -2.95 0.00
 1 21 19 -0.43 0.00
 3 21 19 7.89 0.00
 5 21 19 9.38 0.00
 7 21 19 6.57 0.00
 9 21 19 5.49 0.00
 11 21 19 4.07 0.00
 0 22 19 -4.05 0.00
 2 22 19 -7.26 0.00
 4 22 19 5.20 0.00
 6 22 19 2.49 0.00
 8 22 19 3.94 0.00
 10 22 19 0.91 0.00
 1 23 19 -5.30 0.00
 3 23 19 0.50 0.00
 5 23 19 2.07 0.00
 7 23 19 0.75 0.00
 9 23 19 1.99 0.00
 11 23 19 2.51 0.00
 0 24 19 0.33 0.00
 2 24 19 -12.33 0.00
 4 24 19 0.73 0.00
 6 24 19 -2.98 0.00
 8 24 19 -0.55 0.00
 10 24 19 0.34 0.00
 1 25 19 -16.56 0.00
 3 25 19 -8.83 0.00
 5 25 19 -1.93 0.00
 7 25 19 0.24 0.00
 9 25 19 -2.13 0.00
 0 26 19 4.04 0.00
 2 26 19 -3.99 0.00
 4 26 19 0.51 0.00
 6 26 19 -0.15 0.00
 8 26 19 4.37 0.00
 1 27 19 -2.50 0.00
 3 27 19 -1.75 0.00
 5 27 19 -5.93 0.00
 7 27 19 0.29 0.00
 0 28 19 12.19 0.00
 2 28 19 14.08 0.00
 4 28 19 1.09 0.00
 6 28 19 -1.95 0.00
 1 29 19 0.50 0.00
 3 29 19 0.64 0.00
 5 29 19 -7.63 0.00
 7 29 19 -0.02 0.00
 0 30 19 -2.88 0.00
 2 30 19 6.75 0.00
 4 30 19 -4.65 0.00
 6 30 19 0.02 0.00
 1 31 19 2.35 0.00
 3 31 19 1.38 0.00
 0 32 19 -5.21 0.00
 2 32 19 2.31 0.00
 0 0 20 -1.92 0.00
 6 0 20 -4.78 0.00
 8 0 20 0.21 0.00
 10 0 20 -3.35 0.00
 12 0 20 -9.02 0.00
 7 1 20 1.42 0.00
 9 1 20 6.70 0.00
 11 1 20 -2.12 0.00
 13 1 20 2.05 0.00
 6 2 20 -2.52 0.00
 8 2 20 1.87 0.00
 10 2 20 1.21 0.00
 12 2 20 -2.09 0.00
 7 3 20 -2.21 0.00
 9 3 20 1.59 0.00
 11 3 20 -1.90 0.00
 13 3 20 1.53 0.00
 6 4 20 -4.05 0.00
 8 4 20 -3.17 0.00
 10 4 20 -2.61 0.00
 12 4 20 -1.39 0.00
 7 5 20 -0.33 0.00
 9 5 20 -0.06 0.00
 11 5 20 -3.61 0.00
 13 5 20 -5.65 0.00
 6 6 20 1.88 0.00
 8 6 20 3.20 0.00
 10 6 20 3.60 0.00
 12 6 20 -0.23 0.00
 7 7 20 0.09 0.00
 9 7 20 -0.28 0.00
 11 7 20 -2.42 0.00
 13 7 20 -9.16 0.00
 6 8 20 0.03 0.00
 8 8 20 0.61 0.00
 10 8 20 2.55 0.00
 12 8 20 -3.76 0.00
 5 9 20 -5.23 0.00
 7 9 20 -5.13 0.00
 9 9 20 -3.31 0.00
 11 9 20 -4.85 0.00
 13 9 20 -8.94 0.00
 6 10 20 -3.11 0.00
 8 10 20 -2.37 0.00
 10 10 20 -0.41 0.00
 12 10 20 -5.78 0.00
 5 11 20 -2.49 0.00
 7 11 20 0.51 0.00
 9 11 20 2.52 0.00
 11 11 20 0.49 0.00
 4 12 20 1.46 0.00
 6 12 20 5.00 0.00
 8 12 20 2.16 0.00
 10 12 20 4.57 0.00
 12 12 20 -0.20 0.00
 1 13 20 -2.33 0.00
 3 13 20 -4.30 0.00
 5 13 20 -2.17 0.00
 7 13 20 0.17 0.00
 9 13 20 0.84 0.00
 11 13 20 3.72 0.00
 0 14 20 2.18 0.00
 2 14 20 -2.46 0.00
 4 14 20 -3.01 0.00
 6 14 20 2.16 0.00
 8 14 20 -4.86 0.00
 10 14 20 0.89 0.00
 12 14 20 0.49 0.00
 1 15 20 4.00 0.00
 3 15 20 1.29 0.00
 5 15 20 2.88 0.00
 7 15 20 2.61 0.00
 9 15 20 1.84 0.00
 11 15 20 6.13 0.00
 0 16 20 4.21 0.00
 2 16 20 3.30 0.00
 4 16 20 3.07 0.00
 6 16 20 8.80 0.00
 8 16 20 0.97 0.00
 10 16 20 1.33 0.00
 1 17 20 0.53 0.00
 3 17 20 -1.41 0.00
 5 17 20 -1.86 0.00
 7 17 20 -3.59 0.00
 9 17 20 -1.07 0.00
 11 17 20 1.73 0.00
 0 18 20 1.74 0.00
 2 18 20 2.02 0.00
 4 18 20 0.24 0.00
 6 18 20 4.48 0.00
 8 18 20 1.11 0.00
 10 18 20 0.66 0.00
 1 19 20 0.08 0.00
 3 19 20 -3.07 0.00
 5 19 20 -0.62 0.00
 7 19 20 -1.77 0.00
 9 19 20 2.73 0.00
 0 20 20 3.16 0.00
 2 20 20 1.04 0.00
 4 20 20 2.08 0.00
 6 20 20 7.27 0.00
 8 20 20 4.52 0.00
 10 20 20 3.94 0.00
 1 21 20 -3.89 0.00
 3 21 20 -6.76 0.00
 5 21 20 -1.99 0.00
 7 21 20 -4.75 0.00
 9 21 20 -2.01 0.00
 0 22 20 3.90 0.00
 2 22 20 1.51 0.00
 4 22 20 5.49 0.00
 6 22 20 6.85 0.00
 8 22 20 0.08 0.00
 1 23 20 -4.51 0.00
 3 23 20 -2.79 0.00
 5 23 20 1.94 0.00
 7 23 20 2.31 0.00
 0 24 20 -11.22 0.00
 2 24 20 -7.15 0.00
 4 24 20 0.50 0.00
 6 24 20 4.79 0.00
 1 25 20 -3.11 0.00
 3 25 20 -1.19 0.00
 5 25 20 -3.15 0.00
 0 26 20 -6.67 0.00
 2 26 20 -0.62 0.00
 4 26 20 -2.16 0.00
 6 26 20 1.03 0.00
 1 27 20 5.66 0.00
 3 27 20 4.24 0.00
 0 28 20 -7.93 0.00
 2 28 20 -0.94 0.00
 0 0 0 0.00 0.00
# SQUEEZE RESULTS (Version = 150216)
# Note: Data are Listed for all Voids in the P1 Unit Cell
# i.e. Centre of Gravity, Solvent Accessible Volume,
# Recovered number of Electrons in the Void and
# Details about the Squeezed Material
;
loop_
  _platon_missing_refln_index_h
  _platon_missing_refln_index_k
  _platon_missing_refln_index_l
  _platon_missing_refln_theta
 1 1 0 2.385
 0 2 0 2.067
 1 3 0 3.774
 0 4 0 4.136
 1 5 0 5.604
 0 0 1 2.472
 0 2 1 3.223
 0 0 4 9.934
 0 0 5 12.453
 0 0 6 14.996
 0 2 6 15.145
 0 0 7 17.571
 1 1 7 17.742
 0 2 7 17.700
 0 4 7 18.082
 0 6 7 18.704
 0 0 8 20.183
 2 0 8 20.675
 1 1 8 20.335
 0 2 8 20.297
 1 3 8 20.563
 0 4 8 20.639
 0 6 8 21.197
 0 8 8 21.960

_platon_squeeze_details
;
TITL 3D\Atomistic
CELL   20.5570   42.7525   17.8758     90.00     90.00     90.00
SPGR Cmmm
# Solvent Accessible Volume =      5422
# Electrons Found in S.A.V. =      1961
# Note: Atoms in Void as Cxxx and Qxxx all others
C101 0.500 0.440 0.253 !       2.31 eA-3
C102 0.228 0.070 0.497 !       1.59 eA-3
C103 0.500 0.391 0.125 !       1.34 eA-3
C104 0.500 0.499 0.078 !       1.32 eA-3
Q105 0.179 0.059 0.502 !       1.32 eA-3
C106 0.236 0.090 0.001 !       1.29 eA-3
C107 1.000 0.071 0.187 !       1.23 eA-3
C108 0.715 0.500 0.219 !       1.23 eA-3
C109 0.973 0.199 0.502 !       1.21 eA-3
C110 0.510 0.287 0.468 !       1.19 eA-3
C111 1.000 0.079 0.127 !       1.15 eA-3
Q112 0.623 0.479 0.157 !       1.14 eA-3
C113 0.500 0.410 0.141 !       1.12 eA-3
C114 0.500 0.282 0.423 !       1.12 eA-3
Q115 0.611 0.498 0.172 !       1.11 eA-3
Q116 0.528 0.500 0.375 !       1.10 eA-3
C117 0.500 0.480 0.062 !       1.10 eA-3
C118 1.000 0.181 0.482 !       1.10 eA-3
C119 0.737 0.426 0.027 !       1.08 eA-3
C120 0.769 0.098 0.498 !       1.03 eA-3
Q121 0.721 0.085 0.058 !       1.03 eA-3
C122 0.269 0.053 0.423 !       1.03 eA-3
C123 1.000 0.206 0.410 !       1.02 eA-3
C124 0.500 0.380 0.078 !       1.02 eA-3
C125 1.000 0.145 0.000 !       1.01 eA-3
Q126 0.340 0.502 0.172 !       0.98 eA-3
Q127 0.951 0.059 0.496 !       0.97 eA-3
C128 1.000 0.176 0.002 !       0.95 eA-3
C129 0.823 0.090-0.001 !       0.95 eA-3
Q130 0.567 0.027 0.003 !       0.95 eA-3
Q131 0.581 0.463 0.173 !       0.93 eA-3
C132 0.313 0.398 0.018 !       0.92 eA-3
Q133 0.647 0.500 0.422 !       0.92 eA-3
C134 0.500 0.270 0.373 !       0.91 eA-3
C135 0.728 0.042 0.482 !       0.90 eA-3
Q136 0.500 0.059-0.010 !       0.90 eA-3
C137 1.000 0.117 0.034 !       0.88 eA-3
Q138 1.000 0.468 0.308 !       0.88 eA-3
C139 0.500 0.356 0.048 !       0.87 eA-3
C140 0.673 0.486 0.141 !       0.87 eA-3
Q141 0.610 0.027 0.002 !       0.86 eA-3
Q142 0.743 0.502 0.078 !       0.85 eA-3
Q143 0.922 0.498 0.109 !       0.85 eA-3
C144 0.928 0.191 0.502 !       0.85 eA-3
C145 0.500 0.077 0.374 !       0.85 eA-3
Q146 0.314 0.474 0.123 !       0.84 eA-3
C147 1.000 0.436 0.332 !       0.83 eA-3
C148 0.958 0.145-0.002 !       0.82 eA-3
Q149 0.794 0.010 0.265 !       0.82 eA-3
C150 0.970 0.105 0.064 !       0.80 eA-3
Q151 0.741 0.501 0.172 !       0.80 eA-3
Q152 0.281 0.484 0.096 !       0.79 eA-3
C153 0.384 0.458 0.077 !       0.78 eA-3
Q154 0.765 0.500 0.406 !       0.78 eA-3
C155 0.038 0.221 0.407 !       0.77 eA-3
Q156 0.500 0.035 0.218 !       0.77 eA-3
C157 1.000 0.138 0.109 !       0.77 eA-3
C158 0.287 0.442 0.079 !       0.77 eA-3
C159 0.500 0.288 0.078 !       0.76 eA-3
C160 0.138 0.029 0.110 !       0.76 eA-3
Q161 0.525 0.052 0.343 !       0.75 eA-3
C162 0.295 0.040 0.410 !       0.75 eA-3
C163 0.973 0.057 0.156 !       0.75 eA-3
C164 0.162 0.044 0.093 !       0.75 eA-3
C165 0.679 0.055 0.502 !       0.75 eA-3
C166 1.000 0.394 0.422 !       0.74 eA-3
C167 0.312 0.499 0.062 !       0.74 eA-3
Q168 0.705 0.501 0.109 !       0.74 eA-3
C169 0.511 0.351 0.099 !       0.73 eA-3
C170 0.794 0.051 0.005 !       0.73 eA-3
C171 0.180 0.500 0.391 !       0.73 eA-3
C172 0.500 0.317 0.047 !       0.72 eA-3
C173 0.164 0.063 0.067 !       0.72 eA-3
Q174 0.034 0.027 0.496 !       0.72 eA-3
C175 0.500 0.338 0.111 !       0.72 eA-3
C176 1.000 0.246-0.002 !       0.72 eA-3
C177 0.279 0.023 0.501 !       0.72 eA-3
C178 0.793 0.125 0.500 !       0.71 eA-3
C179 0.176 0.121-0.002 !       0.71 eA-3
C180 0.957 0.028 0.046 !       0.70 eA-3
Q181 0.289 0.015 0.405 !       0.70 eA-3
Q182 0.371 0.500 0.219 !       0.70 eA-3
Q183 0.205 0.476 0.438 !       0.70 eA-3
C184 0.829 0.089 0.062 !       0.69 eA-3
Q185 0.191 0.024 0.077 !       0.69 eA-3
Q186 0.988 0.477 0.094 !       0.68 eA-3
C187 0.283 0.109-0.003 !       0.68 eA-3
Q188 0.935 0.023 0.215 !       0.68 eA-3
C189 0.438 0.417 0.079 !       0.68 eA-3
C190 0.500 0.469 0.125 !       0.67 eA-3
C191 1.000 0.377 0.394 !       0.67 eA-3
C192 0.500 0.231 0.000 !       0.67 eA-3
C193 0.017 0.102 0.001 !       0.66 eA-3
Q194 0.500 0.409 0.467 !       0.66 eA-3
Q195 0.578 0.047 0.356 !       0.66 eA-3
C196 0.968 0.149 0.487 !       0.66 eA-3
Q197 0.226 0.043 0.155 !       0.65 eA-3
C198 0.878 0.117 0.000 !       0.65 eA-3
C199 0.531 0.064 0.393 !       0.65 eA-3
;
loop_
  _platon_squeeze_void_nr
  _platon_squeeze_void_average_x
  _platon_squeeze_void_average_y
  _platon_squeeze_void_average_z
  _platon_squeeze_void_volume
  _platon_squeeze_void_count_electrons
  _platon_squeeze_void_content
 1 -0.014 0.000 -0.064 2724 982 ' '
 2 0.489 0.500 -0.117 2721 981 ' '

_platon_squeeze_void_probe_radius 1.20
loop_
  _refln_index_h
  _refln_index_k
  _refln_index_l
  _refln_F_squared_meas
  _refln_F_squared_sigma
 0 0 2 76.24 0.8
 0 0 3 0.87 0.11
 0 0 9 264.36 3.34
 0 0 10 92.72 2.06
 0 0 11 158.01 3.32
 0 0 11 152.72 2.74
 0 0 12 18.98 1.02
 0 0 13 23.46 1.17
 0 0 14 0.51 0.22
 0 0 15 0.06 0.18
 0 0 16 0.04 0.2
 0 0 17 6.46 0.64
 0 0 18 2.75 0.42
 0 0 19 11.12 0.78
 0 -2 2 181.61 1.24
 0 -2 3 13.29 0.41
 0 -2 4 13.98 0.48
 0 -2 5 119.35 1.6
 0 -2 9 176.91 2.75
 0 2 9 185.47 2.77
 0 2 10 58.55 1.64
 0 2 10 54.44 1.7
 0 2 11 143.15 3.06
 0 -2 11 135.54 2.6
 0 2 11 138.37 2.59
 0 -2 12 8.05 0.68
 0 2 12 8.37 0.85
 0 2 12 6.6 0.61
 0 -2 13 17.99 1.03
 0 2 13 18.43 1.03
 0 2 14 -0.09 0.2
 0 -2 14 0.04 0.17
 0 2 15 3.97 0.51
 0 -2 15 4.94 0.58
 0 2 16 0.09 0.19
 0 -2 16 0.05 0.19
 0 -2 17 0.16 0.18
 0 2 17 0.11 0.17
 0 2 18 1.6 0.35
 0 -2 18 1.05 0.29
 0 -2 19 6.62 0.6
 0 2 19 5.88 0.57
 0 2 20 5.75 0.53
 0 -4 1 20.18 0.32
 0 -4 2 598.42 2.31
 0 -4 3 1.44 0.14
 0 -4 4 391.36 2.62
 0 -4 5 40.58 0.94
 0 -4 6 200.62 2.3
 0 4 9 235.9 3.13
 0 4 10 36.76 1.36
 0 4 10 40.02 1.35
 0 4 11 38.71 1.36
 0 4 11 36.64 1.5
 0 4 12 6.58 0.76
 0 -4 12 7.01 0.63
 0 4 12 5.6 0.53
 0 4 13 1.38 0.46
 0 4 13 1.01 0.25
 0 -4 13 1.23 0.29
 0 -4 14 1.65 0.36
 0 4 14 1.08 0.3
 0 -4 15 19 1.11
 0 4 15 18.04 1.07
 0 4 16 3.31 0.48
 0 -4 16 3.64 0.51
 0 4 17 2.08 0.4
 0 -4 17 2.46 0.43
 0 -4 18 0.05 0.14
 0 4 18 0.3 0.18
 0 4 19 12.67 0.81
 0 -4 19 13.54 0.87
 0 4 20 5.82 0.52
 0 -6 0 68.08 0.59
 0 -6 1 7.04 0.21
 0 -6 2 137.31 1.15
 0 -6 3 8.83 0.36
 0 -6 4 244.72 2.09
 0 -6 5 143.08 1.78
 0 -6 6 102.69 1.66
 0 6 9 126.33 2.33
 0 6 10 42.27 1.4
 0 6 10 42.54 1.44
 0 6 11 10.97 0.8
 0 6 11 11.18 0.74
 0 -6 11 9.91 0.73
 0 6 12 1.91 0.39
 0 -6 12 1.65 0.33
 0 6 12 1.76 0.3
 0 -6 13 18.02 1.06
 0 6 13 18.41 1.01
 0 -6 14 7.71 0.74
 0 6 14 6.61 0.66
 0 6 14 9.01 0.92
 0 -6 15 57.83 1.95
 0 6 15 58.03 1.89
 0 6 16 19.51 1.12
 0 -6 16 19.5 1.15
 0 -6 17 15.89 1.02
 0 6 17 14.94 0.97
 0 6 18 2.19 0.39
 0 -6 18 1.85 0.36
 0 6 19 1.99 0.32
 0 6 20 1.26 0.24
 0 -8 0 19.42 0.36
 0 -8 1 9.71 0.27
 0 -8 2 133.87 1.2
 0 -8 3 144.04 1.45
 0 -8 4 28.61 0.74
 0 -8 5 138.66 1.81
 0 -8 6 226.91 2.53
 0 -8 7 54.87 1.35
 0 8 9 3.31 0.39
 0 8 9 2.95 0.37
 0 8 10 24.86 1.12
 0 -8 10 26.36 1.13
 0 -8 11 28.13 1.22
 0 8 11 31.71 1.26
 0 8 11 32.11 1.36
 0 -8 12 0.87 0.24
 0 8 12 0.66 0.24
 0 8 12 0.89 0.24
 0 8 13 27.86 1.26
 0 8 13 30.64 1.5
 0 -8 13 26.12 1.25
 0 8 14 24.11 1.22
 0 8 14 27.61 1.52
 0 -8 14 25.65 1.28
 0 8 15 83.99 2.67
 0 8 15 79.25 2.23
 0 -8 15 77.79 2.26
 0 8 16 39.18 1.61
 0 -8 16 38.96 1.64
 0 8 17 3.25 0.47
 0 -8 17 4.04 0.52
 0 8 18 0.01 0.13
 0 -8 18 0.03 0.13
 0 8 19 0.06 0.12
 0 8 20 0.13 0.12
 0 -10 0 133.13 1.05
 0 -10 1 1.31 0.12
 0 -10 2 1.47 0.14
 0 -10 3 13.31 0.46
 0 -10 4 198.56 1.99
 0 -10 5 176.17 2.08
 0 -10 6 319.23 3.07
 0 -10 7 212.22 2.71
 0 10 9 9.69 0.66
 0 10 9 8.9 0.63
 0 10 10 30.82 1.22
 0 -10 10 33.54 1.28
 0 10 10 34.58 1.32
 0 10 11 8.5 0.68
 0 10 11 8.86 0.67
 0 -10 11 6.89 0.62
 0 10 12 3.95 0.45
 0 -10 12 5.67 0.58
 0 10 12 5.01 0.56
 0 10 13 21.95 1.24
 0 -10 13 20.22 1.11
 0 10 13 21.61 1.12
 0 -10 14 33.95 1.47
 0 10 14 33.47 1.64
 0 10 14 31.37 1.4
 0 -10 15 55.71 1.92
 0 10 15 60.39 2.2
 0 10 15 58.89 1.95
 0 10 16 14.85 0.97
 0 -10 16 13.81 0.97
 0 -10 17 6.8 0.68
 0 10 17 6.24 0.63
 0 10 18 2.01 0.35
 0 10 19 -0.1 0.16
 0 10 20 -0.07 0.14
 0 -12 0 131.09 1.18
 0 -12 1 105.25 1.1
 0 -12 2 4.78 0.27
 0 -12 3 37.52 0.8
 0 -12 4 23.27 0.72
 0 -12 5 267.62 2.65
 0 -12 6 249.97 2.82
 0 -12 7 282.9 3.23
 0 12 8 2 0.28
 0 12 8 2.34 0.34
 0 12 9 74.82 1.85
 0 12 9 83.5 1.95
 0 12 10 25.72 1.13
 0 12 10 25.27 1.13
 0 -12 10 22.16 1.05
 0 -12 11 9.43 0.72
 0 12 11 11.13 0.79
 0 12 12 0.79 0.18
 0 12 12 0.46 0.15
 0 -12 12 0.77 0.25
 0 12 13 0.63 0.22
 0 12 13 0.59 0.22
 0 -12 13 0.7 0.25
 0 12 14 26.87 1.32
 0 12 14 25.06 1.35
 0 -12 14 25.67 1.29
 0 12 15 11.64 0.87
 0 -12 15 9.27 0.79
 0 12 15 11.17 0.96
 0 12 16 16.65 1.13
 0 12 16 17.93 1.07
 0 -12 16 15.35 1.02
 0 12 17 2.78 0.42
 0 12 18 -0.01 0.14
 0 12 19 0.07 0.13
 0 12 20 0.39 0.18
 0 -14 0 113.05 1.2
 0 -14 -1 238.19 1.9
 0 -14 1 240.83 1.84
 0 -14 2 23.3 0.63
 0 -14 3 22.58 0.66
 0 -14 4 34.84 0.93
 0 -14 5 97.99 1.68
 0 -14 6 204.59 2.64
 0 -14 7 4.37 0.43
 0 14 8 14.95 0.81
 0 14 8 15.89 0.81
 0 14 9 32.27 1.2
 0 14 9 36.29 1.31
 0 14 10 81.83 2.04
 0 14 10 86.64 2.08
 0 14 11 11.75 0.8
 0 14 11 10.37 0.75
 0 14 12 8.17 0.7
 0 14 12 8.02 0.68
 0 14 13 0.04 0.23
 0 14 13 0.3 0.19
 0 14 14 0.38 0.2
 0 14 14 0.25 0.25
 0 14 15 9.26 0.78
 0 14 15 9.03 0.85
 0 14 16 12.97 0.91
 0 14 16 11.29 0.91
 0 14 17 -0.18 0.21
 0 14 18 -0.07 0.19
 0 14 19 3.12 0.43
 0 -16 0 36.14 0.75
 0 -16 -1 203.62 1.84
 0 -16 1 197.59 1.85
 0 -16 2 24.32 0.7
 0 -16 3 2.62 0.25
 0 -16 4 2.4 0.27
 0 -16 5 99.78 1.78
 0 -16 6 1.49 0.25
 0 -16 7 3.31 0.39
 0 16 8 17.43 0.89
 0 16 8 20.21 0.92
 0 16 9 67.1 1.8
 0 16 9 56.48 1.6
 0 16 10 68.03 1.86
 0 16 10 66.39 1.85
 0 16 11 26.1 1.21
 0 16 11 22.17 1.1
 0 16 12 8.27 0.69
 0 16 12 8.94 0.74
 0 16 13 2.44 0.38
 0 16 13 3.61 0.49
 0 16 14 7.97 0.73
 0 16 14 6.83 0.67
 0 16 15 1.68 0.35
 0 16 15 1.73 0.37
 0 16 16 3.25 0.48
 0 16 16 3.32 0.47
 0 16 17 -0.49 0.26
 0 16 18 6.94 0.62
 0 16 19 3.91 0.45
 0 -18 0 33.99 0.82
 0 -18 -1 117.79 1.55
 0 -18 1 115.65 1.56
 0 -18 2 1.89 0.22
 0 -18 -2 1.98 0.24
 0 -18 3 5.03 0.36
 0 -18 4 11.06 0.59
 0 -18 5 7.68 0.53
 0 -18 6 12.82 0.73
 0 -18 7 5.02 0.48
 0 18 8 35.64 1.28
 0 18 9 68.71 1.8
 0 18 9 78.4 1.97
 0 18 10 147 2.8
 0 18 10 148.38 2.77
 0 18 11 11.24 0.81
 0 18 11 13.91 0.89
 0 18 12 25.64 1.22
 0 18 12 28.85 1.32
 0 18 13 0.22 0.15
 0 18 13 -0.07 0.31
 0 18 14 2.55 0.42
 0 18 14 1.92 0.35
 0 18 15 1 0.29
 0 18 15 0.73 0.27
 0 18 16 5.67 0.59
 0 18 16 4.85 0.61
 0 18 17 -0.11 0.25
 0 18 18 6.47 0.59
 0 18 19 4.33 0.48
 0 -20 0 10.46 0.53
 0 -20 1 221.19 2.4
 0 -20 -1 223.42 2.33
 0 -20 -2 1.94 0.24
 0 -20 2 1.77 0.21
 0 -20 3 71.25 1.45
 0 -20 4 4.92 0.41
 0 20 5 30.26 1.18
 0 -20 5 28.98 1.05
 0 20 6 5.72 0.54
 0 -20 6 11.66 0.73
 0 20 7 0.57 0.2
 0 -20 7 0.23 0.14
 0 20 9 16.92 0.91
 0 20 9 18.77 0.98
 0 20 10 41.76 1.52
 0 20 10 43.1 1.51
 0 20 11 8.67 0.74
 0 20 11 10.92 0.81
 0 20 12 1.87 0.35
 0 20 12 1.97 0.37
 0 20 13 2.3 0.38
 0 20 13 1.37 0.3
 0 20 14 5.3 0.58
 0 20 14 4.46 0.52
 0 20 15 0.76 0.29
 0 20 15 0.9 0.29
 0 20 16 7.97 0.7
 0 20 16 6.77 0.66
 0 20 17 -0.17 0.2
 0 20 18 4.45 0.47
 0 22 0 9.35 0.71
 0 22 -1 175.66 2.71
 0 22 1 168.86 2.73
 0 22 2 0.56 0.19
 0 22 -2 0.47 0.2
 0 22 -3 95.55 2.06
 0 22 3 98.05 2.15
 0 22 -4 38.87 1.36
 0 22 4 41.13 1.46
 0 22 5 77.59 1.98
 0 22 -5 71.44 1.88
 0 22 6 50.83 1.62
 0 22 -6 47.47 1.59
 0 22 7 21.64 1.08
 0 22 8 0.68 0.21
 0 22 9 11.68 0.78
 0 22 10 21.26 1.08
 0 22 10 19.81 1.05
 0 22 11 1.16 0.3
 0 22 11 1.43 0.31
 0 22 12 18.88 1.07
 0 22 12 18.59 1.09
 0 22 13 0.58 0.18
 0 22 13 1.28 0.3
 0 22 14 10.46 0.81
 0 22 14 12.96 0.91
 0 22 15 1.27 0.34
 0 22 15 1.09 0.32
 0 22 16 14.66 0.93
 0 22 16 11.12 0.84
 0 22 17 0.45 0.19
 0 22 18 0.18 0.14
 0 24 0 17.65 0.94
 0 24 1 98.98 2.2
 0 24 -1 102.64 2.22
 0 24 -2 0.16 0.17
 0 24 2 0.23 0.17
 0 24 -3 122.94 2.5
 0 24 3 123.37 2.56
 0 24 4 119.36 2.57
 0 24 -4 121.81 2.54
 0 24 -5 347.25 4.36
 0 24 5 342.5 4.42
 0 24 6 67.41 1.97
 0 24 -6 66.21 1.97
 0 24 7 59.89 1.85
 0 24 8 2.35 0.39
 0 24 9 3.05 0.41
 0 24 10 6.04 0.61
 0 24 11 1.19 0.29
 0 24 12 0.83 0.27
 0 24 13 2.28 0.39
 0 24 13 1.37 0.29
 0 24 14 29.13 1.33
 0 24 14 25.39 1.27
 0 24 15 2.01 0.39
 0 24 15 1.72 0.37
 0 24 16 20.43 1.06
 0 24 16 17.6 1.02
 0 26 0 16.33 0.95
 0 26 1 26 1.21
 0 26 -1 26.17 1.2
 0 26 2 2.47 0.39
 0 26 -2 2.37 0.38
 0 26 -3 68.4 1.97
 0 26 3 67.33 2.01
 0 26 -4 97.86 2.39
 0 26 4 91.99 2.39
 0 26 5 239.53 3.81
 0 26 -5 245.29 3.88
 0 26 -6 167.88 3.29
 0 26 6 160.39 3.13
 0 26 7 36.5 1.5
 0 26 8 0.44 0.19
 0 26 9 0.48 0.22
 0 26 10 13.17 0.9
 0 26 11 -0.14 0.23
 0 26 12 14.77 0.96
 0 26 13 3.72 0.49
 0 26 14 7.65 0.67
 0 26 15 7.45 0.67
 0 26 16 21.12 1.1
 0 28 0 13.96 0.94
 0 28 1 9.05 0.75
 0 28 -1 9 0.74
 0 28 2 4.7 0.57
 0 28 -2 4.57 0.55
 0 28 3 46.93 1.74
 0 28 -3 44.16 1.66
 0 28 -4 84.6 2.36
 0 28 4 83.4 2.35
 0 28 -5 162.27 3.32
 0 28 5 160.17 3.27
 0 28 6 56.73 1.97
 0 28 -6 64.46 2.14
 0 28 7 17.96 1.11
 0 28 -7 18.5 1.2
 0 28 8 -0.01 0.2
 0 28 9 8.77 0.76
 0 28 10 19.47 1.12
 0 28 11 1.92 0.38
 0 28 12 3.9 0.5
 0 28 13 1.79 0.36
 0 28 14 27.64 1.28
 0 28 15 9.11 0.73
 0 28 16 14.46 0.86
 0 30 0 28.07 1.37
 0 30 1 32.03 1.5
 0 30 -1 32.95 1.49
 0 30 2 0.81 0.31
 0 30 -2 0.11 0.21
 0 30 -3 11.87 0.94
 0 30 3 12.08 0.94
 0 30 -4 52.85 1.95
 0 30 4 52.99 1.94
 0 30 5 12.98 1.01
 0 30 -5 13.45 1.01
 0 30 -6 11.2 0.95
 0 30 6 9.84 0.88
 0 30 -7 20 1.29
 0 30 7 18.31 1.15
 0 30 8 4.6 0.59
 0 30 9 17.67 1.08
 0 30 10 26.53 1.35
 0 30 11 10.55 0.86
 0 30 12 1.56 0.35
 0 30 13 2.7 0.41
 0 30 14 20.98 1.1
 0 30 15 8.87 0.7
 0 32 0 122.83 3.01
 0 32 1 43.75 1.8
 0 32 -1 43.42 1.8
 0 32 -2 18.77 1.21
 0 32 2 18.54 1.2
 0 32 -3 5.11 0.66
 0 32 3 4.76 0.65
 0 32 4 1.9 0.43
 0 32 -4 2.21 0.44
 0 32 -5 0.65 0.34
 0 32 5 0.37 0.27
 0 32 -6 39.01 1.8
 0 32 6 35.42 1.65
 0 32 7 2.32 0.41
 0 32 8 12.47 0.96
 0 32 9 34.25 1.52
 0 32 9 35.58 1.58
 0 32 10 56.84 1.97
 0 32 11 28 1.37
 0 32 12 7.31 0.69
 0 32 13 -0.16 0.23
 0 32 14 2.83 0.4
 0 32 15 3.46 0.42
 0 34 0 222.04 4.14
 0 34 1 61.02 2.25
 0 34 -1 55.8 2.15
 0 34 2 35.13 1.67
 0 34 -2 35.68 1.68
 0 34 3 29.51 1.59
 0 34 -3 29.44 1.55
 0 34 -4 7.17 0.79
 0 34 4 7.15 0.79
 0 34 5 24.74 1.42
 0 34 -5 22.68 1.41
 0 34 -6 13.03 1.07
 0 34 6 11.84 0.97
 0 34 7 1.77 0.37
 0 34 8 23.47 1.3
 0 34 8 20.86 1.24
 0 34 9 50.08 1.84
 0 34 9 54.11 1.94
 0 34 10 58.96 2.03
 0 34 11 44.5 1.7
 0 34 12 9.43 0.77
 0 34 13 2.78 0.4
 0 34 14 -0.11 0.15
 0 36 0 256.15 4.61
 0 36 -1 18.62 1.33
 0 36 1 17.79 1.35
 0 36 -2 162.56 3.7
 0 36 2 159.96 3.65
 0 36 -3 3.92 0.65
 0 36 3 4.25 0.7
 0 36 4 15.33 1.17
 0 36 -4 15.11 1.15
 0 36 5 6.89 0.78
 0 36 -5 5.67 0.73
 0 36 6 16.87 1.17
 0 36 7 0.53 0.25
 0 36 8 13.07 0.98
 0 36 8 14.13 1.02
 0 36 9 39.22 1.67
 0 36 9 35.86 1.53
 0 36 10 40.57 1.68
 0 36 11 40.22 1.6
 0 36 12 8.71 0.72
 0 36 13 3.54 0.44
 0 38 0 118.66 3.24
 0 38 -1 23.91 1.51
 0 38 1 25.17 1.58
 0 38 -2 37.52 1.79
 0 38 2 38.73 1.85
 0 38 -3 3.01 0.59
 0 38 3 2.6 0.52
 0 38 -4 23.13 1.46
 0 38 4 23.68 1.44
 0 38 5 9.95 0.95
 0 38 -5 8.18 0.92
 0 38 6 6.17 0.73
 0 38 7 1.22 0.33
 0 38 7 1.56 0.35
 0 38 8 7.03 0.73
 0 38 8 6.55 0.69
 0 38 9 27.55 1.37
 0 38 10 18.12 1.1
 0 38 11 23.27 1.16
 0 38 12 1.38 0.31
 0 38 13 0.81 0.21
 0 40 0 189.69 4.04
 0 40 -1 1.19 0.46
 0 40 1 1.77 0.5
 0 40 -2 0.63 0.27
 0 40 2 0.8 0.33
 0 40 3 3.55 0.64
 0 40 -3 3.98 0.66
 0 40 -4 53.04 2.16
 0 40 4 54.85 2.17
 0 40 5 12.15 1.03
 0 40 6 15.18 1.11
 0 40 7 1.33 0.37
 0 40 7 2.08 0.43
 0 40 8 1.02 0.31
 0 40 8 1.25 0.32
 0 40 9 13.79 0.95
 0 40 10 3.84 0.5
 0 40 11 4.84 0.52
 0 40 12 -0.1 0.15
 0 42 0 13.2 1.07
 0 42 -1 0.12 0.25
 0 42 1 0.34 0.29
 0 42 2 6.51 0.77
 0 42 -2 6.46 0.76
 0 42 3 5.88 0.76
 0 42 -3 5.99 0.77
 0 42 4 51.59 2.04
 0 42 5 26.48 1.45
 0 42 6 38.72 1.63
 0 42 6 35.52 1.61
 0 42 7 2.99 0.5
 0 42 7 1.85 0.41
 0 42 8 0.55 0.23
 0 42 8 0.21 0.16
 0 42 9 1.48 0.33
 0 42 10 0.51 0.21
 0 42 11 0.09 0.13
 0 44 0 5.79 0.69
 0 44 1 0.19 0.23
 0 44 -1 -0.42 0.35
 0 44 2 3.19 0.52
 0 44 -2 2.69 0.51
 0 44 3 6.49 0.74
 0 44 4 41.74 1.74
 0 44 5 23.19 1.25
 0 44 5 22.02 1.25
 0 44 6 31 1.41
 0 44 6 28.46 1.38
 0 44 7 10.48 0.82
 0 44 7 7.18 0.67
 0 44 8 0.92 0.28
 0 44 9 0.54 0.21
 0 46 0 11.32 0.91
 0 46 1 1.24 0.36
 0 46 2 0.35 0.24
 0 46 3 3.04 0.48
 0 46 4 24.73 1.22
 0 46 4 23.92 1.23
 0 46 5 15.43 0.97
 0 46 5 15.82 0.99
 0 46 6 22.2 1.12
 0 46 7 10.38 0.75
 0 48 3 0.66 0.2
 0 48 4 6.08 0.59
 0 48 5 7.8 0.64
 -1 1 1 1000 2.19
 -1 -1 2 5.02 0.21
 -1 1 2 5.68 0.22
 -1 1 3 0.33 0.08
 -1 -1 3 0.32 0.08
 -1 1 4 11.51 0.44
 -1 -1 4 11.4 0.44
 -1 1 5 61.8 1.13
 -1 -1 5 61.93 1.15
 -1 -1 6 8.77 0.49
 1 1 9 93.1 2.01
 -1 1 9 92.39 1.96
 -1 -1 9 96.35 2.02
 1 -1 9 93.64 2
 1 -1 10 157.14 2.71
 -1 -1 10 156.27 2.68
 -1 1 10 159.97 2.71
 1 1 10 158.66 2.69
 -1 -1 10 149.98 2.89
 -1 1 10 156.24 2.91
 -1 1 11 29.62 1.22
 1 1 11 30.61 1.5
 -1 1 11 29.53 1.4
 1 1 11 29.47 1.22
 1 -1 11 30.26 1.25
 -1 -1 11 31.57 1.28
 -1 -1 12 77.19 2.05
 1 1 12 75.27 2
 -1 1 12 76.32 2.05
 1 -1 12 74.34 1.98
 -1 -1 13 2.26 0.41
 -1 1 13 2.07 0.38
 1 1 13 1.45 0.32
 1 -1 13 2.47 0.39
 -1 1 14 3.77 0.5
 1 -1 14 3.26 0.46
 1 1 14 3.54 0.47
 -1 -1 14 3.36 0.48
 -1 1 15 -0.1 0.18
 1 -1 15 -0.16 0.21
 1 1 15 -0.07 0.19
 -1 -1 15 -0.01 0.18
 -1 -1 16 0 0.18
 -1 1 16 -0.01 0.17
 1 -1 16 -0.14 0.23
 1 1 16 0.08 0.17
 1 1 17 0.1 0.15
 1 -1 17 0.35 0.17
 -1 1 17 0.17 0.17
 -1 -1 17 0.29 0.18
 -1 1 18 8.41 0.72
 1 1 18 8.37 0.71
 -1 -1 18 8.05 0.7
 1 -1 18 8 0.7
 -1 -1 19 2.75 0.41
 -1 1 19 2.72 0.4
 1 -1 19 3.1 0.42
 1 1 19 2.66 0.39
 1 -1 20 6.96 0.57
 1 1 20 6.88 0.57
 -1 -3 1 604.47 1.93
 -1 3 1 595.19 1.61
 -1 3 2 26.31 0.47
 -1 -3 2 25.24 0.5
 -1 -3 3 5.88 0.28
 -1 3 3 6.35 0.28
 -1 -3 4 10.14 0.42
 -1 -3 5 126.45 1.64
 -1 -3 6 46.23 1.11
 -1 -3 7 0.08 0.12
 1 3 9 92.49 2.02
 -1 3 9 95.97 2
 -1 -3 10 101.25 2.18
 -1 3 10 100.38 2.27
 1 -3 10 101.31 2.18
 1 3 10 104.03 2.18
 -1 3 10 102.65 2.17
 1 3 11 14.18 0.99
 1 3 11 13.65 0.82
 1 -3 11 15.8 0.91
 -1 -3 11 16.71 0.93
 -1 3 11 14.83 0.99
 -1 3 11 13.14 0.81
 1 3 12 25.84 1.16
 -1 -3 12 23.76 1.16
 1 -3 12 23.24 1.13
 -1 3 12 25.33 1.17
 -1 3 12 29.17 1.47
 1 3 12 28.36 1.52
 -1 3 13 0.49 0.22
 1 -3 13 0.23 0.17
 1 3 13 0.09 0.18
 -1 3 13 0.62 0.38
 -1 -3 13 0.53 0.22
 -1 3 14 2.06 0.38
 -1 -3 14 1.83 0.36
 1 -3 14 1.94 0.37
 1 3 14 1.42 0.29
 1 -3 15 0.39 0.22
 -1 -3 15 0.39 0.23
 -1 3 15 0.24 0.17
 1 3 15 0.21 0.19
 1 3 16 2.95 0.43
 -1 3 16 2.74 0.44
 -1 -3 16 3.28 0.49
 1 -3 16 3 0.45
 1 -3 17 -0.04 0.17
 1 3 17 0.05 0.15
 -1 -3 17 0.14 0.17
 -1 3 17 0.15 0.18
 -1 3 18 3.23 0.46
 -1 -3 18 2.93 0.44
 1 -3 18 3.27 0.45
 1 3 18 3.3 0.45
 1 -3 19 2.7 0.4
 -1 3 19 3.1 0.42
 1 3 19 3.15 0.42
 1 3 20 5.76 0.51
 1 -5 1 50.41 0.46
 -1 -5 1 49.13 0.61
 1 -5 2 13.16 0.34
 -1 -5 2 13.08 0.37
 -1 -5 3 7.4 0.33
 1 -5 3 7.92 0.32
 -1 -5 4 44.53 0.9
 -1 -5 5 95.34 1.45
 -1 -5 6 38.58 1.05
 -1 -5 7 11.93 0.62
 -1 -5 8 19.33 0.83
 -1 5 9 70.95 1.75
 1 5 9 69.76 1.75
 -1 5 10 59.39 1.64
 1 -5 10 55.11 1.63
 1 5 10 51.32 1.62
 1 5 10 59.7 1.65
 -1 -5 10 54.53 1.63
 -1 5 10 56.01 1.68
 1 5 11 2.91 0.44
 1 -5 11 3.6 0.43
 1 5 11 3.34 0.43
 -1 5 11 3.26 0.4
 -1 -5 11 3.97 0.46
 -1 5 11 2.92 0.43
 -1 -5 12 0.9 0.24
 -1 5 12 1.39 0.35
 -1 5 12 1.06 0.25
 1 -5 12 0.87 0.23
 1 5 12 0.79 0.22
 1 5 12 0.89 0.33
 -1 5 13 0.76 0.24
 1 5 13 0.62 0.22
 1 5 13 1.34 0.42
 -1 5 13 0.76 0.34
 1 -5 13 0.81 0.26
 -1 -5 13 1.07 0.3
 1 5 14 19.03 1.05
 1 -5 14 20.38 1.13
 -1 -5 14 20.75 1.16
 -1 5 14 21 1.13
 1 5 15 4.67 0.56
 1 -5 15 5.22 0.6
 -1 5 15 4.56 0.56
 -1 -5 15 5.71 0.65
 1 5 16 25.96 1.26
 -1 5 16 25.04 1.24
 -1 -5 16 27.71 1.37
 1 -5 16 26.46 1.3
 1 5 17 2.52 0.4
 -1 -5 17 2.38 0.42
 1 -5 17 2.4 0.41
 -1 5 17 2.55 0.44
 1 -5 18 1.26 0.3
 -1 5 18 1.28 0.31
 1 5 18 1.4 0.31
 -1 -5 18 1.41 0.32
 1 -5 19 2.04 0.35
 -1 5 19 2.65 0.4
 1 5 19 2.75 0.39
 1 5 20 1.7 0.29
 -1 -7 0 3.52 0.18
 -1 -7 1 0.78 0.1
 1 -7 1 0.82 0.07
 -1 -7 2 33 0.62
 1 -7 2 31.54 0.53
 -1 -7 3 130.9 1.41
 1 -7 3 132.54 1.33
 -1 -7 4 11.63 0.47
 1 -7 4 10.49 0.44
 -1 -7 5 121.18 1.67
 -1 -7 6 65.53 1.37
 -1 -7 7 62.62 1.45
 -1 -7 8 3.16 0.37
 -1 7 9 5.32 0.5
 1 7 9 5.21 0.5
 -1 7 9 5.11 0.51
 -1 -7 9 5.46 0.49
 -1 7 10 34.49 1.31
 1 7 10 35.73 1.29
 1 7 10 30.99 1.25
 -1 -7 10 31.3 1.25
 -1 7 10 34.13 1.27
 1 -7 10 31.22 1.22
 1 7 11 4.72 0.49
 1 7 11 5.28 0.55
 -1 7 11 4.55 0.48
 1 -7 11 5.79 0.54
 -1 7 11 5.06 0.56
 -1 -7 11 5.59 0.56
 -1 7 12 4.98 0.57
 1 -7 12 4.55 0.5
 -1 7 12 4.59 0.49
 1 7 12 4.62 0.56
 -1 -7 12 4.68 0.52
 1 7 12 4.76 0.5
 1 7 13 5.27 0.68
 1 -7 13 5.23 0.57
 -1 -7 13 5.54 0.6
 1 7 13 3.96 0.47
 -1 7 13 4.87 0.66
 -1 7 13 4.4 0.54
 -1 7 14 47.99 1.72
 1 7 14 45.73 1.65
 1 -7 14 45.04 1.7
 -1 -7 14 48.24 1.77
 1 -7 15 23.69 1.26
 -1 7 15 23.47 1.25
 -1 -7 15 25.37 1.32
 1 7 15 23.68 1.22
 1 -7 16 42.12 1.66
 -1 -7 16 43.1 1.71
 1 7 16 40.15 1.61
 -1 7 16 41.63 1.63
 1 7 17 3.77 0.5
 -1 7 17 4.2 0.54
 -1 -7 17 3.55 0.52
 1 -7 17 3.63 0.5
 1 -7 18 0.28 0.18
 -1 7 18 0.37 0.2
 1 7 18 0.26 0.17
 -1 7 19 0.49 0.2
 1 7 19 0.17 0.13
 1 -7 19 0.3 0.17
 1 7 20 0.02 0.13
 1 -9 0 34.43 0.37
 -1 -9 0 32.97 0.59
 -1 -9 1 1.61 0.14
 1 -9 1 1.62 0.1
 1 -9 2 5.72 0.24
 -1 -9 2 6.26 0.29
 1 -9 3 120.22 1.29
 -1 -9 3 120.48 1.43
 -1 -9 4 123.58 1.57
 1 -9 4 122.39 1.52
 -1 -9 5 166.4 2.03
 1 -9 5 168.71 1.98
 -1 -9 6 161.32 2.19
 -1 -9 7 120.72 2.04
 -1 -9 8 29.62 1.09
 1 9 9 1.13 0.25
 -1 9 9 1.39 0.29
 -1 -9 9 0.91 0.24
 1 9 9 1.18 0.24
 -1 9 9 1.57 0.29
 1 9 10 17.97 0.96
 -1 9 10 18.22 0.97
 -1 -9 10 15.31 0.89
 1 -9 10 15.35 0.86
 1 9 10 20.11 0.99
 -1 9 10 18.86 0.94
 -1 9 11 4.76 0.52
 1 -9 11 4.62 0.5
 1 9 11 4.84 0.54
 -1 -9 11 5 0.54
 -1 9 11 4.12 0.46
 1 9 11 4.46 0.49
 -1 9 12 1.48 0.28
 1 -9 12 1.3 0.29
 1 9 12 1.43 0.29
 1 9 12 0.9 0.24
 -1 -9 12 1.26 0.29
 -1 9 12 0.95 0.28
 -1 -9 13 13.3 0.92
 1 -9 13 12.54 0.87
 1 9 13 10.91 0.8
 -1 9 13 11.67 0.94
 -1 9 13 10.74 0.82
 1 9 13 11.93 0.93
 -1 9 14 47.2 1.73
 1 9 14 45.86 1.68
 -1 9 14 44.96 1.94
 1 -9 14 42.99 1.65
 1 9 14 46.43 2.01
 -1 -9 14 46.47 1.74
 1 -9 15 40.13 1.63
 -1 9 15 40.13 1.63
 -1 -9 15 39.91 1.66
 -1 9 15 43.05 1.88
 1 9 15 40.49 1.61
 -1 9 16 25.8 1.28
 -1 -9 16 26.61 1.36
 1 -9 16 26.52 1.32
 1 9 16 26.06 1.3
 1 9 17 3.56 0.47
 -1 -9 17 3.61 0.51
 -1 9 17 3.67 0.5
 1 -9 17 3.55 0.49
 1 9 18 1.2 0.28
 -1 9 18 1.15 0.27
 1 -9 18 1.2 0.28
 -1 9 19 0.06 0.12
 1 9 19 -0.14 0.18
 1 9 20 -0.03 0.11
 -1 -11 0 66.48 0.9
 1 -11 0 68.28 0.62
 1 -11 1 38.73 0.53
 -1 -11 1 37.83 0.71
 -1 -11 2 1.56 0.16
 1 -11 2 1.57 0.13
 1 -11 3 19.83 0.54
 -1 -11 3 20.03 0.62
 1 -11 4 75.27 1.22
 -1 -11 4 79.31 1.32
 1 -11 5 167.43 2.01
 -1 -11 5 169.72 2.13
 -1 -11 6 195.57 2.49
 -1 -11 7 225.84 2.87
 -1 11 8 13.17 0.73
 -1 -11 8 11.88 0.72
 -1 11 8 13.42 0.74
 1 11 8 14.19 0.77
 1 11 9 14.6 0.83
 -1 11 9 15.57 0.83
 -1 -11 9 13.25 0.81
 -1 11 9 13.24 0.78
 1 11 9 14.9 0.83
 1 11 10 10.76 0.76
 1 -11 10 8.57 0.65
 -1 -11 10 9.16 0.71
 1 11 10 12.42 0.79
 -1 11 10 11.85 0.76
 -1 11 10 11.73 0.77
 1 -11 11 7 0.61
 -1 11 11 7.44 0.65
 -1 11 11 6.32 0.57
 -1 -11 11 7.04 0.63
 1 11 11 8.19 0.68
 1 11 11 7.42 0.64
 1 11 12 -0.24 0.18
 -1 -11 12 0.27 0.21
 1 -11 12 0.15 0.14
 -1 11 12 -0.27 0.24
 -1 11 12 0.05 0.2
 1 11 12 -0.13 0.24
 -1 11 13 6.06 0.61
 1 -11 13 5.85 0.6
 1 11 13 5.46 0.6
 1 11 13 5.41 0.56
 -1 -11 13 6.44 0.65
 -1 11 13 5.86 0.63
 -1 11 14 21.02 1.27
 1 11 14 18.92 1.26
 -1 -11 14 19.29 1.13
 1 -11 14 19.15 1.11
 -1 11 14 22.48 1.21
 1 11 14 21.19 1.15
 -1 11 15 22.09 1.2
 -1 11 15 21.38 1.31
 -1 -11 15 20.56 1.18
 1 11 15 20.43 1.17
 1 -11 15 20.85 1.18
 -1 -11 16 11.69 0.91
 1 -11 16 11.3 0.87
 -1 11 16 11.81 0.88
 -1 11 16 12.13 0.98
 1 11 16 12.2 0.88
 1 -11 17 5.61 0.6
 -1 11 17 6.67 0.66
 1 11 17 6.9 0.65
 1 11 18 0.03 0.15
 -1 11 18 0.2 0.16
 1 11 19 -0.1 0.15
 -1 11 19 -0.01 0.16
 1 11 20 0.02 0.1
 1 -13 0 250.75 1.37
 -1 -13 0 245.85 1.89
 1 -13 1 69.14 0.78
 -1 -13 1 67.91 1.04
 1 -13 2 1.91 0.15
 -1 -13 2 2.06 0.19
 1 -13 3 19.12 0.55
 -1 -13 3 20.09 0.66
 1 -13 4 28.98 0.77
 -1 -13 4 31.51 0.88
 -1 -13 5 63.2 1.38
 1 -13 5 63.64 1.29
 -1 -13 6 227.82 2.81
 -1 -13 7 48.68 1.41
 -1 -13 8 1.21 0.25
 1 13 8 1.53 0.28
 -1 13 8 1.27 0.21
 1 13 8 1.23 0.21
 -1 13 8 1.62 0.27
 -1 13 9 26.1 1.1
 -1 -13 9 31.32 1.29
 1 13 9 29.65 1.15
 1 13 9 27.74 1.15
 -1 13 9 30.19 1.17
 1 13 10 22.96 1.09
 -1 13 10 23.21 1.08
 1 13 10 24.89 1.12
 -1 13 10 24.78 1.11
 -1 13 11 10.59 0.76
 1 13 11 12.21 0.82
 1 13 11 11.71 0.8
 -1 -13 11 11.9 0.84
 -1 13 11 11.7 0.8
 -1 13 12 0.31 0.16
 -1 13 12 0.18 0.25
 -1 -13 12 0.69 0.26
 1 13 12 0.74 0.25
 1 -13 12 0.57 0.22
 1 13 12 0.17 0.21
 -1 13 13 0.29 0.2
 1 13 13 -0.02 0.23
 -1 -13 13 0.43 0.2
 1 13 13 -0.12 0.23
 1 -13 13 0.34 0.18
 -1 13 13 0.04 0.22
 1 -13 14 1.61 0.36
 -1 13 14 1.82 0.39
 1 13 14 1.27 0.26
 -1 -13 14 1.26 0.31
 -1 13 14 1.07 0.31
 1 13 14 1.2 0.31
 1 13 15 11.03 0.84
 -1 13 15 11.39 0.87
 -1 13 15 9.48 0.91
 -1 -13 15 10.13 0.84
 1 13 15 9.65 0.89
 -1 13 16 6.08 0.64
 -1 13 16 5.53 0.68
 1 13 16 6.31 0.64
 1 13 17 1.66 0.3
 -1 13 17 1.59 0.32
 -1 13 18 0.43 0.19
 1 13 18 0.01 0.19
 1 13 19 0.67 0.22
 -1 13 19 0.54 0.19
 1 -15 0 206.23 1.41
 -1 -15 0 210.54 1.93
 -1 -15 -1 48.01 0.97
 -1 -15 1 50.87 0.98
 1 -15 -1 47.23 0.73
 1 -15 1 51.1 0.73
 -1 -15 2 24.61 0.72
 1 -15 2 22.41 0.54
 -1 -15 3 0.24 0.11
 1 -15 3 0.24 0.09
 1 -15 4 16.79 0.6
 -1 -15 4 18.49 0.72
 -1 -15 5 31.26 1.02
 1 -15 5 30.17 0.9
 -1 -15 6 27.8 1.03
 -1 -15 7 1.16 0.26
 -1 -15 8 16.79 0.92
 -1 15 8 18.65 0.87
 -1 15 8 18.56 0.9
 -1 15 9 50.3 1.5
 -1 15 9 46.21 1.47
 1 15 9 49.95 1.51
 1 15 9 48.65 1.55
 1 15 10 37.91 1.41
 1 15 10 34.43 1.32
 -1 15 10 33.83 1.29
 -1 15 10 39.68 1.41
 1 15 11 36.81 1.42
 -1 15 11 36.03 1.41
 1 15 11 36.75 1.45
 -1 15 11 37.04 1.41
 1 15 12 1.78 0.35
 -1 15 12 1.65 0.33
 -1 15 12 1.65 0.34
 1 15 12 1.39 0.31
 1 15 13 0.95 0.27
 -1 15 13 0.96 0.28
 1 15 13 0.72 0.25
 -1 15 13 0.76 0.26
 -1 15 14 -0.21 0.25
 1 15 14 -0.04 0.2
 -1 15 14 0.25 0.16
 1 15 14 -0.25 0.26
 1 15 15 8.5 0.75
 -1 15 15 7.99 0.73
 -1 15 15 7.9 0.78
 1 15 15 7.6 0.76
 1 15 16 0.68 0.22
 -1 15 16 0.49 0.2
 -1 15 16 0.64 0.28
 -1 15 17 -0.4 0.29
 1 15 17 -0.29 0.25
 -1 15 18 0.96 0.25
 1 15 18 1.05 0.26
 1 15 19 5.38 0.52
 -1 15 19 5.48 0.54
 -1 -17 0 176.28 1.91
 1 -17 0 164.67 1.41
 -1 -17 -1 13.31 0.54
 1 -17 1 13.02 0.39
 1 -17 -1 13.22 0.43
 1 -17 2 24.38 0.59
 -1 -17 2 34.06 0.93
 1 -17 3 0.39 0.1
 -1 -17 3 0.43 0.13
 -1 -17 4 10.51 0.59
 1 -17 4 9.05 0.45
 -1 -17 5 0.83 0.2
 1 -17 5 0.78 0.17
 -1 -17 6 1.16 0.24
 -1 -17 7 10.13 0.7
 1 17 7 8.05 0.6
 -1 17 8 32.4 1.15
 -1 -17 8 29.44 1.29
 -1 17 8 33.26 1.21
 1 17 8 36.18 1.31
 1 17 9 72.41 1.86
 -1 17 9 72.94 1.84
 1 17 9 69.97 1.87
 -1 17 10 42.55 1.49
 -1 17 10 36.8 1.37
 1 17 10 44.31 1.54
 1 17 10 36.67 1.38
 1 17 11 39.43 1.49
 -1 17 11 40.86 1.51
 1 17 11 41.61 1.54
 -1 17 11 40.79 1.51
 -1 17 12 3.95 0.51
 1 17 12 3.82 0.5
 -1 17 12 3.86 0.5
 1 17 12 3.68 0.49
 -1 17 13 1.49 0.33
 1 17 13 1.47 0.32
 -1 17 13 0.89 0.2
 1 17 13 0.78 0.23
 -1 17 14 0.32 0.21
 1 17 14 0.03 0.21
 1 17 14 -0.53 0.31
 -1 17 14 -0.08 0.2
 1 17 15 3.46 0.5
 -1 17 15 3.49 0.52
 -1 17 15 3.89 0.51
 1 17 15 3.09 0.47
 1 17 16 -0.33 0.22
 -1 17 16 0.23 0.2
 -1 17 16 -0.13 0.2
 -1 17 17 0.01 0.17
 -1 17 17 0.05 0.16
 1 17 17 -0.2 0.22
 -1 17 18 1.41 0.29
 1 17 18 1.29 0.28
 1 17 19 12.05 0.76
 -1 -19 0 232.41 2.47
 -1 -19 1 5.38 0.41
 -1 -19 -1 4.33 0.35
 1 -19 -2 0.72 0.13
 -1 -19 2 0.58 0.14
 -1 -19 -2 0.72 0.17
 1 -19 3 0.19 0.07
 -1 -19 3 0.19 0.11
 -1 -19 4 3.6 0.37
 1 -19 4 2.2 0.22
 -1 -19 5 0.28 0.13
 1 -19 5 0.28 0.11
 1 19 6 3.95 0.42
 -1 -19 6 4.64 0.49
 -1 -19 7 1.57 0.32
 1 19 7 1.66 0.3
 1 19 7 1.5 0.28
 -1 19 7 1.62 0.29
 1 19 8 21.64 1.01
 -1 19 8 21.77 0.98
 -1 19 8 22.05 0.99
 -1 -19 8 22.61 1.18
 1 19 8 24.02 1.08
 1 19 9 74.03 1.95
 -1 19 9 74.61 1.89
 1 19 9 73.86 1.89
 -1 19 9 68.8 1.84
 1 19 10 33.04 1.36
 1 19 10 25.21 1.17
 -1 19 10 30.84 1.29
 -1 19 10 27.24 1.2
 -1 19 11 29.18 1.3
 1 19 11 27 1.24
 -1 19 11 28.34 1.25
 1 19 11 28.81 1.29
 1 19 12 1.59 0.34
 -1 19 12 1.76 0.37
 -1 19 12 2.59 0.42
 1 19 12 1.96 0.35
 -1 19 13 0.1 0.26
 1 19 13 0.63 0.23
 -1 19 13 0.61 0.24
 1 19 13 0.24 0.17
 1 19 14 -0.41 0.3
 1 19 14 0.03 0.18
 -1 19 14 0.02 0.19
 -1 19 14 -0.12 0.23
 -1 19 15 5.11 0.59
 -1 19 15 6.04 0.62
 1 19 15 6.22 0.64
 1 19 15 5.04 0.6
 1 19 16 0.25 0.18
 1 19 16 0.46 0.23
 -1 19 16 0.44 0.24
 -1 19 16 0.01 0.16
 -1 19 17 0.13 0.15
 -1 19 17 0.37 0.2
 1 19 17 0.17 0.17
 -1 19 18 0.87 0.26
 1 19 18 0.98 0.24
 -1 -21 0 288.75 3.07
 -1 -21 1 4.55 0.43
 1 21 1 3.26 0.4
 -1 -21 -1 4.1 0.38
 1 21 2 1.95 0.31
 -1 -21 2 2.21 0.3
 -1 -21 -2 1.86 0.26
 -1 21 -2 1.79 0.29
 -1 21 2 2.04 0.33
 -1 -21 -3 5.87 0.5
 -1 21 3 4.28 0.46
 -1 21 -3 3.71 0.41
 1 21 3 4.3 0.46
 -1 -21 3 5.65 0.49
 1 21 -4 27.81 1.11
 1 21 4 30.7 1.21
 -1 21 4 30.55 1.2
 -1 21 -4 27.82 1.11
 -1 -21 5 15.72 0.89
 -1 21 -5 12.93 0.79
 1 21 -5 12.54 0.77
 -1 21 5 14.05 0.84
 1 21 5 15.13 0.87
 1 21 6 27.85 1.19
 -1 -21 6 26.86 1.22
 -1 21 -6 26.8 1.16
 -1 21 6 26.56 1.15
 -1 21 7 2.07 0.34
 1 21 7 2.27 0.36
 1 21 8 7.39 0.63
 -1 21 8 6.27 0.52
 -1 -21 8 7.51 0.74
 1 21 9 20.93 1.06
 1 21 9 19.1 1
 -1 21 9 20.97 1.03
 1 21 10 7.54 0.66
 -1 21 10 8.26 0.67
 1 21 10 8.97 0.72
 -1 21 10 7.35 0.66
 -1 21 11 25.3 1.21
 1 21 11 24.53 1.2
 -1 21 11 24.34 1.2
 1 21 11 25.35 1.22
 1 21 12 1.18 0.29
 1 21 12 1.04 0.27
 -1 21 12 1.27 0.33
 -1 21 12 1.28 0.3
 1 21 13 -0.07 0.24
 1 21 13 0.11 0.16
 -1 21 13 -0.01 0.14
 -1 21 13 -0.45 0.3
 1 21 14 0.33 0.21
 1 21 14 -0.21 0.26
 -1 21 14 0.16 0.22
 -1 21 14 0.4 0.22
 -1 21 15 15.07 0.98
 1 21 15 12.69 0.9
 -1 21 15 13.5 0.92
 1 21 15 15.79 0.99
 1 21 16 0.47 0.2
 1 21 16 0.54 0.26
 -1 21 16 0.24 0.19
 -1 21 16 0.42 0.21
 -1 21 17 0.24 0.15
 -1 21 17 0 0.17
 1 21 17 0.3 0.17
 1 21 18 0.29 0.16
 -1 23 0 178.61 2.84
 1 23 0 179.64 2.84
 1 23 -1 5.54 0.53
 1 23 1 5.81 0.54
 -1 23 1 5.93 0.55
 -1 23 -1 5.85 0.54
 -1 23 -2 1.3 0.25
 1 23 2 0.85 0.19
 -1 23 2 1.28 0.28
 1 23 -2 1.3 0.26
 1 23 3 18.92 0.98
 -1 23 -3 18.86 0.96
 -1 23 3 18.79 0.98
 1 23 -3 18.15 0.93
 -1 23 -4 190.36 3.05
 1 23 4 190.32 3.12
 -1 23 4 192.58 3.13
 1 23 -4 183.43 3.04
 -1 23 -5 45.25 1.56
 1 23 -5 44.46 1.53
 -1 23 5 46.26 1.59
 1 23 5 47.63 1.61
 -1 23 -6 75.69 2.07
 1 23 -6 73.75 2.02
 1 23 6 78.68 2.05
 -1 23 6 78.46 2.06
 -1 23 7 13.92 0.89
 1 23 7 15.6 0.93
 1 23 8 2.37 0.37
 -1 23 9 1.86 0.32
 1 23 9 2.09 0.34
 1 23 10 1.1 0.27
 -1 23 10 1.25 0.31
 -1 23 11 2.9 0.45
 1 23 11 3.87 0.48
 1 23 11 2.87 0.44
 -1 23 12 0.48 0.25
 -1 23 12 0.47 0.21
 1 23 12 0.35 0.19
 1 23 12 0.55 0.25
 -1 23 13 2.09 0.36
 1 23 13 1.59 0.33
 1 23 13 2.4 0.4
 -1 23 13 2.33 0.39
 1 23 14 0.73 0.24
 1 23 14 1.48 0.35
 -1 23 14 1.27 0.33
 -1 23 14 0.76 0.26
 1 23 15 19.51 1.1
 1 23 15 15.62 0.98
 -1 23 15 17.16 1.03
 -1 23 15 19.18 1.09
 -1 23 16 0.95 0.29
 1 23 16 0.75 0.26
 -1 23 16 1.11 0.29
 1 23 16 1.07 0.29
 -1 23 17 3.28 0.42
 1 23 17 3.46 0.44
 -1 23 17 2.56 0.37
 1 25 0 62.49 1.8
 -1 25 0 59.57 1.78
 -1 25 1 4.1 0.48
 1 25 1 4.05 0.47
 -1 25 -1 4.02 0.48
 1 25 -1 4.19 0.49
 -1 25 2 6.56 0.6
 1 25 -2 6.54 0.58
 1 25 2 6.37 0.61
 -1 25 -2 6.67 0.6
 -1 25 -3 32.96 1.35
 1 25 3 32.67 1.35
 -1 25 3 32.59 1.35
 1 25 -3 33.19 1.33
 1 25 4 183.63 3.2
 -1 25 -4 187.14 3.22
 1 25 -4 191.85 3.26
 -1 25 4 190.22 3.28
 -1 25 5 113.51 2.61
 -1 25 -5 117.87 2.65
 1 25 -5 118.1 2.64
 1 25 5 114.34 2.59
 -1 25 -6 141.91 2.99
 1 25 6 139.86 2.89
 -1 25 6 143.36 2.89
 1 25 -6 138.45 2.91
 1 25 7 44.24 1.65
 -1 25 7 43.69 1.62
 1 25 8 4.24 0.53
 -1 25 8 3.77 0.49
 -1 25 9 3.98 0.5
 1 25 9 3.32 0.46
 -1 25 10 1.33 0.31
 1 25 10 1.1 0.31
 1 25 11 -0.05 0.2
 -1 25 11 0.17 0.21
 -1 25 12 1.66 0.33
 1 25 12 0.98 0.27
 1 25 13 7.75 0.7
 -1 25 13 8.14 0.7
 -1 25 14 1.45 0.3
 1 25 14 1.39 0.3
 1 25 15 23.8 1.17
 -1 25 15 25.75 1.22
 1 25 16 2.59 0.42
 -1 25 16 3.1 0.45
 -1 25 17 4.65 0.48
 -1 27 0 21.44 1.13
 1 27 0 21.91 1.12
 1 27 -1 0.51 0.22
 1 27 1 0.73 0.26
 -1 27 1 0.83 0.25
 -1 27 -1 0.71 0.21
 1 27 2 5.75 0.6
 1 27 -2 5.33 0.56
 -1 27 -2 5.37 0.58
 -1 27 2 5.61 0.61
 1 27 3 29.91 1.36
 -1 27 3 30.09 1.39
 1 27 -3 30.18 1.35
 -1 27 -3 31.1 1.37
 -1 27 -4 121.05 2.75
 -1 27 4 123.83 2.82
 1 27 -4 122.24 2.73
 1 27 4 122.92 2.77
 1 27 5 100.27 2.55
 -1 27 -5 110.23 2.68
 1 27 -5 112.35 2.68
 -1 27 5 102.58 2.56
 -1 27 6 125.51 2.83
 1 27 -6 124.03 2.89
 1 27 6 123.23 2.82
 -1 27 -6 127.09 2.96
 -1 27 7 24.42 1.27
 1 27 7 23.56 1.27
 1 27 8 0.58 0.2
 -1 27 8 0.61 0.22
 1 27 9 2.6 0.4
 -1 27 9 3.48 0.46
 1 27 9 3.32 0.47
 1 27 10 3.06 0.49
 -1 27 10 2.99 0.49
 -1 27 11 0.22 0.2
 1 27 11 0.65 0.3
 -1 27 12 1.89 0.36
 1 27 12 1.83 0.36
 1 27 13 12.87 0.9
 -1 27 13 13.08 0.9
 1 27 14 4.49 0.54
 -1 27 14 4.68 0.53
 1 27 15 21.62 1.1
 -1 27 15 24.53 1.18
 1 27 16 4.31 0.49
 -1 27 16 4.99 0.53
 -1 29 0 10.8 0.82
 1 29 0 11.51 0.87
 -1 29 1 4.88 0.57
 1 29 1 4.93 0.58
 -1 29 -1 5.11 0.6
 1 29 -1 5.13 0.58
 1 29 2 1.74 0.38
 1 29 -2 1.29 0.27
 -1 29 -2 1.35 0.33
 -1 29 2 1.49 0.35
 -1 29 -3 26.45 1.34
 1 29 3 26.6 1.35
 1 29 -3 26.41 1.32
 -1 29 3 26.99 1.36
 1 29 -4 55.11 1.94
 -1 29 4 56.2 1.98
 -1 29 -4 53.8 1.92
 1 29 4 54.17 1.95
 1 29 -5 53.77 1.95
 -1 29 5 50.25 1.89
 1 29 5 48.78 1.85
 -1 29 -5 52.98 1.94
 1 29 -6 23.03 1.3
 1 29 6 21.27 1.22
 -1 29 -6 22.06 1.33
 -1 29 6 22.19 1.27
 1 29 7 7.84 0.75
 -1 29 7 7.46 0.73
 1 29 8 0.04 0.25
 -1 29 8 0.19 0.17
 1 29 9 11.89 0.87
 1 29 9 15.28 1.01
 -1 29 9 14.77 1
 1 29 10 7.39 0.71
 -1 29 10 6.89 0.7
 -1 29 11 2.27 0.4
 1 29 11 1.94 0.39
 -1 29 12 -0.38 0.31
 1 29 12 -0.21 0.23
 -1 29 13 9.95 0.77
 1 29 13 9.87 0.79
 1 29 14 7.94 0.69
 -1 29 14 8.75 0.73
 1 29 15 13.54 0.85
 -1 29 15 16.39 0.94
 -1 29 16 3.03 0.41
 1 31 0 42.33 1.77
 -1 31 0 43.61 1.77
 -1 31 -1 28.64 1.44
 1 31 1 27.49 1.41
 1 31 -1 29.31 1.44
 -1 31 1 28.1 1.43
 -1 31 2 3.19 0.49
 1 31 2 3.41 0.54
 1 31 -2 3.37 0.51
 -1 31 -2 3.26 0.51
 -1 31 -3 6.31 0.7
 1 31 -3 6.02 0.67
 1 31 3 6.15 0.71
 -1 31 3 6.01 0.7
 -1 31 -4 6.92 0.75
 1 31 4 6.69 0.73
 -1 31 4 7.23 0.77
 1 31 -4 6.84 0.72
 -1 31 -5 2.74 0.51
 1 31 5 2.9 0.49
 1 31 -5 2.7 0.47
 -1 31 5 2.67 0.51
 1 31 6 8.87 0.83
 -1 31 6 8.5 0.83
 1 31 -6 9.31 0.87
 -1 31 -6 9.62 0.93
 1 31 7 2.75 0.5
 -1 31 7 2.62 0.48
 1 31 8 4.11 0.54
 -1 31 8 4.26 0.56
 -1 31 8 3.81 0.51
 1 31 9 28.78 1.39
 -1 31 9 27.29 1.34
 -1 31 10 21.75 1.25
 1 31 10 21.08 1.21
 1 31 11 17.12 1.09
 -1 31 11 16.79 1.05
 -1 31 12 1.96 0.37
 1 31 12 2.22 0.4
 -1 31 13 0.76 0.23
 1 31 13 0.87 0.25
 1 31 14 4.37 0.5
 -1 31 14 5.06 0.55
 -1 31 15 7.48 0.63
 1 31 15 6 0.55
 1 33 0 63.35 2.23
 -1 33 0 64.55 2.23
 1 33 -1 93.3 2.65
 1 33 1 93.71 2.65
 -1 33 -1 92.01 2.64
 -1 33 1 89.88 2.61
 -1 33 -2 9.61 0.88
 1 33 -2 9.97 0.92
 1 33 2 10.68 0.96
 -1 33 2 10.35 0.93
 -1 33 -3 12.62 1.02
 1 33 3 12.52 1.01
 -1 33 3 11.87 1.01
 1 33 -3 12.61 0.99
 -1 33 -4 2.93 0.53
 -1 33 4 3.3 0.57
 1 33 4 3.07 0.52
 1 33 -4 2.98 0.53
 1 33 -5 6.35 0.74
 1 33 5 5.41 0.68
 -1 33 -5 6.49 0.78
 -1 33 5 5.86 0.73
 1 33 6 11.27 0.95
 1 33 -6 11.48 0.99
 -1 33 6 10.6 0.96
 -1 33 7 0.01 0.22
 1 33 7 -0.32 0.33
 -1 33 8 10.86 0.89
 1 33 8 10.6 0.91
 -1 33 8 9.91 0.82
 -1 33 9 47.42 1.8
 1 33 9 49.46 1.86
 1 33 10 48.14 1.85
 -1 33 10 47.62 1.82
 1 33 11 23.35 1.27
 -1 33 11 24.02 1.26
 -1 33 12 8.8 0.74
 1 33 12 8.23 0.73
 -1 33 13 0.87 0.27
 1 33 13 0.72 0.24
 1 33 14 -0.2 0.19
 -1 33 14 -0.03 0.14
 -1 33 15 0.95 0.24
 -1 35 0 51.32 2.11
 1 35 0 52.95 2.09
 1 35 -1 131.96 3.24
 -1 35 -1 133.71 3.3
 -1 35 1 131.39 3.27
 1 35 1 132.97 3.24
 -1 35 2 23.78 1.47
 1 35 2 23.29 1.42
 -1 35 -2 21.9 1.39
 1 35 -2 24 1.43
 1 35 3 45.78 1.95
 -1 35 3 46.9 1.98
 -1 35 -3 46.95 1.97
 1 35 -3 44.73 1.93
 1 35 4 -0.02 0.27
 1 35 -4 -0.11 0.29
 -1 35 4 0.06 0.28
 -1 35 -4 -0.05 0.28
 1 35 5 15.6 1.15
 -1 35 -5 16.86 1.24
 -1 35 5 15.98 1.16
 1 35 -5 16.76 1.22
 -1 35 6 5.2 0.65
 1 35 6 4.94 0.64
 1 35 -6 4.13 0.59
 1 35 7 0.13 0.27
 -1 35 7 0.45 0.22
 -1 35 8 12.87 0.96
 1 35 8 12.78 0.96
 1 35 8 14.05 1.05
 -1 35 8 14.28 1.02
 -1 35 9 43.92 1.75
 1 35 9 46.04 1.8
 -1 35 10 47.78 1.82
 1 35 10 47.1 1.82
 -1 35 11 22.97 1.21
 1 35 11 23.15 1.23
 -1 35 12 16.3 0.98
 1 35 12 15.01 0.94
 1 35 13 2.06 0.35
 -1 35 13 2.12 0.37
 1 35 14 0.22 0.14
 -1 35 14 0.33 0.14
 -1 37 0 21.24 1.42
 1 37 0 20.97 1.4
 -1 37 -1 166.37 3.76
 -1 37 1 164.21 3.71
 1 37 -1 163.38 3.67
 1 37 1 162.01 3.65
 1 37 -2 9.03 0.96
 1 37 2 9.4 0.95
 -1 37 -2 8.59 0.95
 -1 37 2 9.99 1.04
 -1 37 3 0.87 0.39
 1 37 3 0.83 0.36
 1 37 -3 0.81 0.33
 -1 37 -3 0.36 0.25
 1 37 4 3.27 0.61
 -1 37 4 3.27 0.58
 1 37 -4 3.19 0.56
 -1 37 -4 2.87 0.56
 1 37 5 9.19 0.89
 -1 37 5 8.84 0.9
 1 37 -5 8.87 0.88
 1 37 -6 3.15 0.54
 -1 37 6 3.23 0.54
 1 37 6 3.47 0.58
 1 37 7 0.13 0.24
 -1 37 7 0.09 0.22
 -1 37 7 -0.28 0.32
 1 37 8 8.41 0.77
 -1 37 8 8.26 0.78
 -1 37 8 8.86 0.8
 1 37 8 9.35 0.84
 1 37 9 18.04 1.1
 -1 37 9 20.84 1.25
 1 37 9 21.74 1.23
 -1 37 10 38.39 1.59
 1 37 10 36.81 1.57
 1 37 11 12.51 0.88
 -1 37 11 11.98 0.87
 -1 37 12 10.34 0.76
 1 37 12 10.5 0.75
 1 37 13 0.56 0.2
 -1 37 13 0.63 0.21
 1 39 0 10.18 1.04
 -1 39 0 10.32 1.13
 1 39 -1 73.69 2.51
 1 39 1 72.86 2.46
 -1 39 -1 71.03 2.5
 -1 39 1 73.72 2.55
 1 39 2 0.45 0.27
 -1 39 2 0.93 0.39
 -1 39 -2 0.48 0.29
 1 39 -2 0.57 0.29
 1 39 3 13.64 1.1
 -1 39 3 13.45 1.09
 -1 39 -3 13.69 1.14
 1 39 -3 13.09 1.07
 1 39 -4 5.61 0.74
 -1 39 4 6.26 0.78
 1 39 4 6.24 0.77
 -1 39 -4 6.11 0.82
 -1 39 5 18.46 1.25
 1 39 -5 18.61 1.27
 1 39 5 18.41 1.25
 1 39 6 3.54 0.55
 -1 39 6 4.1 0.62
 -1 39 7 0.38 0.24
 1 39 7 0.54 0.24
 -1 39 7 0.43 0.26
 -1 39 8 2.03 0.39
 1 39 8 2.78 0.46
 -1 39 8 1.98 0.41
 1 39 8 1.82 0.36
 1 39 9 10.04 0.83
 1 39 9 7.93 0.71
 -1 39 9 10.4 0.84
 1 39 10 14.92 0.98
 -1 39 10 16.35 1.01
 1 39 11 2.58 0.4
 -1 39 11 2.5 0.41
 -1 39 12 1.64 0.3
 1 39 12 1.16 0.25
 -1 41 0 1.25 0.52
 1 41 0 1.85 0.52
 -1 41 1 6.81 0.83
 -1 41 -1 7.56 0.84
 1 41 -1 6.56 0.77
 1 41 1 6.48 0.75
 1 41 -2 0.05 0.29
 -1 41 -2 0.49 0.32
 -1 41 2 0.62 0.34
 1 41 2 0.38 0.25
 1 41 -3 21.7 1.36
 -1 41 -3 21.94 1.41
 1 41 3 22.23 1.35
 -1 41 3 23.35 1.41
 1 41 4 9.86 0.93
 1 41 -4 9.4 0.94
 -1 41 4 9.78 0.95
 -1 41 5 38.47 1.76
 1 41 5 39.41 1.75
 -1 41 6 10.46 0.91
 1 41 6 10.03 0.88
 1 41 7 2.07 0.4
 1 41 7 2.49 0.46
 -1 41 7 2.68 0.45
 -1 41 7 2.46 0.44
 -1 41 8 0.31 0.19
 1 41 8 0.16 0.22
 -1 41 8 0.18 0.16
 1 41 8 0.68 0.25
 1 41 9 1.34 0.31
 -1 41 9 1.66 0.35
 1 41 10 3.52 0.46
 -1 41 10 3.09 0.42
 -1 41 11 0.07 0.15
 1 41 11 -0.08 0.14
 -1 43 0 0.06 0.26
 1 43 0 -0.16 0.29
 -1 43 1 0.45 0.35
 -1 43 -1 0.01 0.29
 1 43 1 0.37 0.27
 1 43 -1 -0.19 0.3
 -1 43 2 0.33 0.24
 1 43 2 0.82 0.36
 1 43 -2 0.31 0.24
 -1 43 -2 0.48 0.29
 1 43 -3 24.07 1.41
 -1 43 3 28.25 1.49
 1 43 3 25.92 1.42
 1 43 4 12.23 0.99
 -1 43 4 12.87 1.05
 -1 43 5 48.06 1.88
 1 43 5 45.75 1.81
 -1 43 5 49.17 1.82
 -1 43 6 18.68 1.14
 1 43 6 17.9 1.12
 -1 43 6 15.36 1.08
 1 43 6 14.52 1.02
 -1 43 7 5.87 0.63
 1 43 7 5.88 0.65
 -1 43 7 5.05 0.6
 1 43 7 5.7 0.63
 -1 43 8 0.06 0.18
 1 43 8 0.37 0.21
 1 43 8 -0.11 0.17
 1 43 9 0.26 0.21
 -1 43 9 -0.09 0.2
 1 43 10 0.34 0.18
 -1 43 10 0.21 0.15
 -1 45 0 0.39 0.3
 1 45 0 0.27 0.23
 1 45 -1 0.32 0.25
 -1 45 1 0.6 0.32
 1 45 1 0.24 0.22
 1 45 -2 0.4 0.25
 1 45 2 0.95 0.32
 -1 45 2 0.67 0.3
 -1 45 3 14.22 1.04
 1 45 3 14.69 1.01
 -1 45 4 9.86 0.81
 -1 45 4 11.58 0.94
 1 45 4 11.47 0.9
 1 45 5 27.98 1.34
 1 45 5 30.67 1.38
 -1 45 5 28.72 1.36
 -1 45 5 27.8 1.38
 1 45 6 14.13 0.94
 -1 45 6 15.5 0.97
 1 45 6 16.23 1.02
 1 45 7 9.54 0.75
 1 45 7 7.28 0.64
 -1 45 7 9.73 0.74
 1 45 8 1.77 0.35
 -1 45 8 1.01 0.25
 1 47 0 2.7 0.46
 1 47 1 5.45 0.62
 1 47 2 0.23 0.19
 1 47 3 1.77 0.35
 -1 47 3 2.14 0.38
 1 47 4 5.45 0.6
 -1 47 4 4.56 0.52
 1 47 4 4.55 0.53
 -1 47 5 12.23 0.83
 1 47 5 13.65 0.88
 1 47 5 10.88 0.8
 -1 47 6 8.88 0.67
 1 47 6 8.95 0.69
 -2 0 0 101.25 0.77
 -2 0 1 15.79 0.32
 -2 0 2 119.58 1.1
 -2 0 3 1.67 0.16
 -2 0 4 21.01 0.61
 -2 0 5 1.13 0.18
 -2 0 6 3.12 0.3
 -2 0 7 0.35 0.14
 2 0 9 60.39 1.61
 -2 0 9 59.89 1.6
 -2 0 10 28.7 1.17
 2 0 10 28.12 1.16
 -2 0 10 26.16 1.23
 -2 0 11 89.14 2.14
 -2 0 11 92.59 2.4
 2 0 11 86.4 2.06
 -2 0 12 3.32 0.46
 2 0 12 3.09 0.47
 -2 0 13 29.01 1.33
 2 0 13 28.36 1.26
 -2 0 14 0.12 0.18
 2 0 14 0.14 0.19
 2 0 15 1.29 0.29
 -2 0 15 1.91 0.39
 -2 0 16 0.53 0.29
 2 0 16 0.45 0.25
 -2 0 17 2.76 0.45
 2 0 17 2.9 0.44
 2 0 18 1.15 0.31
 -2 0 18 1.08 0.3
 2 0 19 4.36 0.48
 2 0 20 2.93 0.37
 -2 2 0 828.75 1.83
 -2 2 1 1.82 0.11
 -2 -2 1 2.06 0.13
 -2 -2 2 63.78 0.81
 -2 2 2 64.11 0.77
 -2 -2 3 14.37 0.46
 -2 2 3 15.78 0.47
 -2 -2 4 56.53 1
 -2 2 4 59.75 1.02
 -2 2 5 1.9 0.22
 -2 -2 5 1.85 0.22
 -2 2 6 5.13 0.37
 -2 -2 6 4.74 0.36
 -2 -2 7 9.86 0.56
 -2 -2 8 12.04 0.66
 2 -2 9 77.1 1.85
 2 2 9 79.46 1.82
 -2 -2 9 76.76 1.83
 -2 2 9 81.25 1.85
 -2 2 10 24.81 1.08
 -2 2 10 24.31 1.15
 -2 -2 10 28.49 1.17
 2 -2 10 27.37 1.15
 2 2 10 23.56 1.05
 2 -2 11 40.06 1.43
 2 2 11 42.1 1.45
 -2 -2 11 41.85 1.48
 -2 2 11 44.13 1.5
 -2 2 11 46.42 1.71
 2 2 12 6.25 0.59
 -2 -2 12 7.09 0.67
 2 -2 12 7.14 0.65
 -2 2 12 7.26 0.76
 -2 2 12 6.84 0.63
 2 2 13 7.02 0.64
 2 -2 13 5.86 0.6
 -2 -2 13 6.53 0.65
 -2 2 13 6.62 0.64
 2 2 14 0.24 0.17
 -2 -2 14 0.33 0.23
 2 -2 14 0.14 0.16
 -2 2 14 0.17 0.18
 2 -2 15 1.01 0.25
 -2 2 15 1.29 0.32
 2 2 15 0.9 0.22
 -2 -2 15 1.07 0.34
 -2 -2 16 0.31 0.24
 2 2 16 -0.12 0.22
 -2 2 16 0.11 0.21
 2 -2 16 -0.06 0.22
 -2 -2 17 4.61 0.56
 2 2 17 4.75 0.54
 -2 2 17 4.86 0.58
 2 -2 17 4.68 0.54
 -2 2 18 0.83 0.26
 2 2 18 0.82 0.25
 -2 -2 18 0.96 0.29
 2 -2 18 0.97 0.28
 2 2 19 7.47 0.62
 -2 2 19 7.48 0.65
 2 -2 19 7.57 0.64
 2 -2 20 1.26 0.26
 2 2 20 1.26 0.25
 -2 4 0 43 0.32
 -2 -4 0 40.88 0.6
 -2 4 1 16.91 0.3
 -2 -4 1 16.7 0.39
 -2 -4 2 33.09 0.63
 -2 4 2 31.85 0.54
 -2 4 3 1.37 0.15
 -2 -4 3 1.41 0.16
 -2 4 4 35.15 0.78
 -2 -4 4 32.49 0.77
 -2 4 5 22.51 0.71
 -2 -4 5 21.75 0.7
 -2 -4 6 0.76 0.18
 -2 -4 7 1.05 0.21
 -2 -4 8 26.71 1
 -2 4 9 29.74 1.14
 2 -4 9 29 1.16
 -2 -4 9 32.16 1.17
 -2 -4 9 30.07 1.15
 -2 4 9 33.48 1.2
 2 4 9 32.34 1.16
 -2 4 10 7.68 0.61
 2 -4 10 9.55 0.68
 -2 4 10 8.2 0.65
 2 4 10 7.38 0.59
 -2 -4 10 9.91 0.7
 2 -4 11 11.04 0.76
 -2 4 11 12.17 0.8
 2 4 11 11.68 0.76
 -2 -4 11 10.25 0.74
 -2 4 11 11.4 0.87
 -2 4 12 0.31 0.18
 -2 4 12 0.31 0.25
 2 -4 12 0.19 0.15
 2 4 12 0.4 0.21
 -2 -4 12 0.12 0.15
 2 4 13 0.46 0.23
 -2 -4 13 0.52 0.25
 -2 4 13 0.42 0.2
 -2 4 13 0.74 0.36
 2 -4 13 0.22 0.15
 2 -4 14 -0.31 0.26
 2 4 14 0.02 0.16
 -2 4 14 0.11 0.2
 -2 -4 14 0.32 0.22
 2 4 15 4.37 0.54
 -2 4 15 4.97 0.59
 2 -4 15 5.4 0.6
 -2 -4 15 5.79 0.66
 2 -4 16 0.57 0.2
 2 4 16 0.59 0.25
 -2 -4 16 0.64 0.28
 -2 4 16 0.41 0.22
 -2 -4 17 0.43 0.22
 2 -4 17 0.57 0.24
 -2 4 17 0.64 0.25
 2 4 17 0.47 0.21
 2 4 18 1.27 0.29
 2 -4 18 1.3 0.31
 -2 4 18 1.29 0.31
 -2 -4 18 1.14 0.32
 2 4 19 0.77 0.23
 2 -4 19 0.61 0.21
 -2 4 19 0.81 0.24
 2 4 20 0.94 0.23
 2 -4 20 1.04 0.25
 -2 -6 0 9.7 0.32
 -2 -6 1 0.44 0.09
 -2 -6 2 14.66 0.44
 -2 6 2 13.56 0.34
 -2 -6 3 41.95 0.82
 -2 -6 4 21.82 0.66
 -2 -6 5 4.59 0.35
 -2 -6 6 37.64 1.03
 -2 -6 7 3.83 0.36
 -2 -6 8 0.77 0.19
 -2 6 9 10.81 0.69
 -2 6 9 11.96 0.73
 2 6 9 11.85 0.72
 -2 -6 9 9.76 0.67
 -2 -6 9 11.48 0.71
 -2 -6 10 0.07 0.13
 2 -6 10 0.12 0.17
 -2 6 10 0.09 0.13
 -2 6 10 0.16 0.15
 2 6 10 0.11 0.14
 2 6 10 -0.13 0.23
 2 6 11 -0.07 0.22
 2 6 11 0 0.18
 2 -6 11 0.15 0.14
 -2 -6 11 0.13 0.14
 -2 6 11 -0.18 0.22
 -2 6 11 -0.04 0.16
 2 6 12 1.34 0.3
 2 -6 12 1.95 0.35
 -2 6 12 1.8 0.4
 -2 -6 12 2.17 0.4
 -2 6 12 1.45 0.31
 -2 6 13 11.23 0.84
 2 6 13 10.66 0.77
 2 -6 13 9.99 0.79
 -2 6 13 10.88 0.96
 -2 -6 13 11.09 0.85
 -2 6 14 4.31 0.53
 -2 -6 14 5.19 0.62
 -2 6 14 5.05 0.71
 2 -6 14 5.04 0.58
 2 6 14 3.71 0.48
 2 6 15 21.66 1.15
 -2 -6 15 24.46 1.31
 -2 6 15 23.28 1.22
 2 -6 15 23.53 1.24
 2 -6 16 6.44 0.67
 -2 6 16 6.42 0.67
 2 6 16 6.32 0.64
 -2 -6 16 6.18 0.68
 -2 -6 17 0.41 0.23
 -2 6 17 0.7 0.26
 2 -6 17 0.08 0.16
 2 6 17 0.2 0.19
 2 6 18 0.17 0.15
 -2 6 18 0.33 0.2
 2 -6 18 0.3 0.2
 2 -6 19 0.27 0.18
 2 6 19 0.16 0.14
 -2 6 19 0.44 0.2
 2 6 20 -0.02 0.13
 -2 -8 0 2.96 0.19
 -2 -8 1 23.39 0.54
 -2 -8 2 22.45 0.58
 -2 -8 3 23.82 0.66
 -2 -8 4 178.58 1.96
 -2 -8 5 17.53 0.66
 -2 -8 6 47.23 1.17
 -2 -8 7 54.27 1.37
 -2 -8 8 16.3 0.81
 -2 8 9 2.13 0.35
 -2 8 9 2.02 0.3
 -2 -8 9 2.12 0.33
 -2 -8 9 2.05 0.32
 2 8 9 1.94 0.31
 -2 8 10 0.09 0.19
 2 -8 10 0.32 0.16
 -2 -8 10 0.39 0.2
 -2 8 10 0.17 0.17
 2 8 10 0.38 0.21
 2 8 10 0.65 0.21
 -2 8 11 9.29 0.71
 -2 8 11 9.75 0.74
 2 -8 11 8.72 0.68
 2 8 11 8.77 0.72
 -2 -8 11 9.25 0.74
 2 8 11 10.38 0.74
 -2 8 12 1.14 0.31
 2 -8 12 1.52 0.32
 2 8 12 0.27 0.16
 -2 8 12 1.07 0.28
 2 8 12 1.04 0.31
 -2 -8 12 1.71 0.39
 2 8 13 24.23 1.18
 -2 8 13 25.94 1.38
 -2 8 13 24.56 1.24
 -2 -8 13 22.67 1.21
 2 -8 13 21.71 1.15
 -2 8 14 13.1 1.08
 2 8 14 11.82 0.85
 -2 8 14 12.61 0.91
 -2 -8 14 12.81 0.95
 2 -8 14 12.55 0.92
 -2 8 15 33.1 1.66
 -2 -8 15 30 1.45
 2 8 15 29.76 1.36
 2 -8 15 27.99 1.35
 -2 8 15 30.7 1.42
 -2 8 16 7.06 0.7
 2 -8 16 6.51 0.66
 -2 -8 16 6 0.66
 2 8 16 5.6 0.6
 -2 8 17 7.93 0.73
 2 -8 17 8.7 0.75
 2 8 17 7.69 0.69
 2 8 18 0.36 0.14
 2 -8 18 0.59 0.24
 -2 8 18 0.47 0.22
 2 8 19 0.1 0.13
 2 -8 19 0.33 0.17
 2 8 20 0.05 0.11
 -2 -10 0 15.72 0.47
 -2 -10 1 2.77 0.21
 -2 -10 2 1.23 0.16
 -2 -10 3 28.37 0.76
 -2 -10 4 71.09 1.28
 -2 -10 5 80.87 1.46
 -2 -10 6 64.93 1.45
 -2 -10 7 73.95 1.64
 -2 10 8 13.71 0.74
 -2 -10 8 14.44 0.79
 2 10 9 1.35 0.27
 -2 -10 9 0.97 0.28
 -2 -10 9 1.02 0.25
 -2 10 9 1.16 0.25
 2 10 9 1.01 0.24
 -2 10 9 1.28 0.28
 -2 -10 10 2.58 0.4
 2 10 10 2.39 0.37
 -2 10 10 2.04 0.32
 2 10 10 2.52 0.39
 -2 10 10 2.72 0.41
 2 -10 10 2.31 0.35
 2 10 11 0.22 0.17
 2 10 11 0.8 0.29
 -2 10 11 0 0.23
 2 -10 11 0.34 0.2
 -2 10 11 -0.12 0.22
 -2 -10 11 0.26 0.24
 2 10 12 7.44 0.71
 -2 10 12 8.5 0.72
 2 -10 12 10.16 0.77
 -2 -10 12 10.54 0.81
 2 10 12 7.65 0.65
 -2 10 12 7.86 0.68
 2 10 13 10.48 0.8
 -2 10 13 9.74 0.79
 2 10 13 9.03 0.83
 -2 10 13 9.1 0.81
 -2 -10 13 8.66 0.77
 2 -10 13 8.71 0.75
 2 10 14 12.01 0.85
 -2 10 14 12.64 1.04
 -2 10 14 13.29 0.93
 2 -10 14 12.31 0.89
 -2 -10 14 12.48 0.92
 2 -10 15 9.27 0.78
 -2 -10 15 7.91 0.75
 -2 10 15 9.21 0.79
 -2 10 15 9.65 0.94
 2 10 15 7.15 0.65
 -2 10 16 14.89 1
 -2 -10 16 13.39 0.98
 2 -10 16 13.49 0.94
 2 10 16 14.03 0.95
 2 -10 17 3.25 0.46
 -2 10 17 3.12 0.48
 2 10 17 2.75 0.42
 2 -10 18 0.69 0.22
 2 10 18 0.98 0.25
 -2 10 18 0.76 0.24
 -2 10 19 0.33 0.17
 2 10 19 0.3 0.15
 2 10 20 0.46 0.15
 -2 -12 0 1.23 0.16
 -2 -12 1 8.44 0.38
 -2 -12 2 3.28 0.26
 -2 -12 3 7.98 0.43
 -2 -12 4 37.4 0.99
 -2 -12 5 25.91 0.88
 -2 -12 6 92.97 1.79
 -2 -12 7 11.7 0.7
 -2 12 8 3.35 0.39
 2 12 8 2.9 0.36
 -2 -12 8 3.34 0.41
 -2 12 8 2.82 0.34
 -2 12 9 2.18 0.32
 2 12 9 2.32 0.33
 -2 12 9 2.43 0.35
 -2 -12 9 2.73 0.4
 2 12 9 2.35 0.33
 -2 -12 9 2.63 0.39
 2 12 10 7.63 0.65
 -2 -12 10 8.4 0.71
 2 -12 10 6.97 0.58
 -2 12 10 8.58 0.66
 -2 -12 10 9.49 0.76
 2 12 10 8.19 0.65
 -2 12 10 7.2 0.6
 2 12 11 1.23 0.28
 -2 12 11 0.72 0.22
 -2 -12 11 1.1 0.3
 2 -12 11 0.75 0.24
 -2 12 11 0.81 0.21
 2 12 11 1.14 0.3
 -2 12 12 0.1 0.17
 -2 -12 12 0.19 0.2
 2 -12 12 0.19 0.18
 2 12 12 0.13 0.17
 -2 12 12 0.14 0.19
 2 12 12 0.05 0.21
 -2 12 13 4.26 0.54
 2 12 13 3.42 0.47
 -2 12 13 3.42 0.5
 -2 -12 13 3.82 0.51
 2 12 13 3.3 0.47
 2 -12 13 3.15 0.45
 -2 12 14 0.02 0.23
 2 12 14 -0.58 0.3
 -2 -12 14 -0.24 0.27
 -2 12 14 0.27 0.21
 2 -12 14 0 0.17
 2 12 15 7.1 0.68
 -2 12 15 7.14 0.72
 -2 12 15 6.93 0.74
 2 -12 15 6.13 0.64
 -2 12 16 4.8 0.57
 -2 12 16 4.77 0.62
 2 12 16 4.84 0.57
 -2 12 17 0.34 0.2
 2 12 17 0.34 0.2
 2 12 18 1.13 0.28
 -2 12 18 1.23 0.3
 -2 12 19 0.12 0.12
 2 12 19 -0.14 0.18
 2 12 20 0.13 0.14
 -2 -14 0 25.92 0.7
 -2 -14 1 23.35 0.68
 -2 -14 -1 23.25 0.7
 -2 -14 2 1.21 0.18
 -2 -14 3 1.73 0.22
 -2 -14 4 3.01 0.31
 -2 -14 5 26.63 0.93
 -2 -14 6 2.69 0.33
 -2 14 7 9.99 0.61
 -2 -14 7 10.65 0.69
 -2 14 8 2.44 0.32
 2 14 8 2.89 0.37
 -2 -14 8 3.32 0.41
 -2 14 8 3.24 0.38
 -2 -14 9 16.41 1.03
 -2 -14 9 17.03 1
 2 14 9 20.9 1.02
 -2 14 9 19.64 0.96
 -2 14 9 17.52 0.9
 2 14 9 16.45 0.87
 -2 -14 10 5.54 0.61
 -2 14 10 5.29 0.53
 -2 -14 10 6 0.65
 2 14 10 4.97 0.55
 -2 14 10 5.18 0.52
 2 14 10 5.65 0.56
 2 14 11 4.97 0.55
 2 14 11 4.38 0.51
 -2 14 11 4.61 0.51
 -2 -14 11 3.76 0.52
 -2 14 11 4.01 0.48
 2 14 12 2.46 0.4
 2 14 12 1.99 0.38
 -2 14 12 1.9 0.37
 -2 14 12 1.81 0.29
 -2 -14 12 2.14 0.4
 -2 14 13 1.51 0.34
 2 14 13 1.23 0.21
 -2 14 13 1.37 0.31
 2 14 13 2.04 0.37
 -2 -14 13 1.43 0.34
 2 14 14 2.2 0.4
 -2 14 14 1.65 0.36
 2 14 14 1.41 0.29
 -2 14 14 2.5 0.43
 -2 14 15 0.05 0.18
 -2 14 15 0.48 0.28
 2 14 15 -0.12 0.26
 -2 14 16 0.42 0.28
 2 14 16 0.35 0.18
 -2 14 16 0.53 0.25
 -2 14 17 0.14 0.17
 2 14 17 -0.02 0.15
 -2 14 18 1.32 0.28
 2 14 18 1.16 0.26
 2 14 19 0.37 0.17
 -2 -16 0 15.5 0.6
 -2 -16 -1 25.48 0.76
 -2 -16 1 25.1 0.78
 -2 -16 2 0.73 0.16
 -2 -16 3 3.23 0.31
 -2 -16 4 1.82 0.27
 -2 -16 5 36.55 1.15
 -2 -16 6 1.32 0.26
 -2 -16 7 11.01 0.73
 2 16 7 12.05 0.73
 -2 16 7 11.19 0.65
 2 16 8 35.3 1.3
 -2 16 8 38.43 1.27
 2 16 9 17.93 0.92
 -2 16 9 19.32 0.95
 -2 -16 9 18.45 1.08
 -2 16 9 21.15 1
 2 16 9 22.89 1.11
 -2 16 10 38.39 1.42
 2 16 10 38.89 1.44
 -2 16 10 38.61 1.4
 2 16 10 40 1.5
 -2 16 11 3.24 0.45
 2 16 11 3.14 0.45
 -2 16 11 3.79 0.48
 2 16 11 3.99 0.52
 -2 16 12 18.42 1.06
 2 16 12 19.8 1.11
 -2 16 12 17.33 1.02
 2 16 12 17.97 1.04
 2 16 13 -0.27 0.3
 -2 16 13 0.01 0.2
 2 16 13 -0.04 0.21
 -2 16 13 -0.38 0.3
 2 16 14 0.3 0.19
 2 16 14 0.54 0.22
 -2 16 14 0.32 0.2
 -2 16 14 0.68 0.24
 -2 16 15 0.52 0.3
 2 16 15 -0.07 0.18
 -2 16 15 0.3 0.22
 2 16 16 0.28 0.18
 -2 16 16 0.55 0.25
 -2 16 16 0.2 0.19
 -2 16 17 1.07 0.29
 2 16 17 0.96 0.25
 -2 16 18 3.03 0.42
 2 16 18 2.98 0.41
 2 16 19 3.07 0.4
 -2 -18 0 0.59 0.15
 -2 -18 -1 30.31 0.9
 -2 -18 1 30.7 0.93
 -2 -18 -2 2.28 0.28
 -2 -18 2 2.47 0.28
 -2 -18 3 0.13 0.1
 -2 -18 4 35.54 1.17
 -2 -18 5 18.17 0.88
 -2 -18 6 12.24 0.77
 2 18 6 10.03 0.69
 2 18 7 24.61 1.07
 -2 -18 7 24.22 1.15
 -2 -18 8 33.63 1.42
 2 18 8 27.6 1.18
 -2 18 8 29.85 1.14
 2 18 8 23.84 1.07
 -2 18 8 23.68 1.02
 -2 -18 9 22.97 1.26
 2 18 9 21.9 1.04
 -2 18 9 23.54 1.08
 -2 18 9 25.55 1.11
 2 18 10 19.91 1.04
 -2 18 10 20.33 1.04
 -2 18 10 20.08 1.04
 2 18 10 20.9 1.1
 2 18 11 5.27 0.57
 -2 18 11 5.24 0.56
 2 18 11 6.93 0.66
 -2 18 11 6.83 0.65
 -2 18 12 4.16 0.51
 2 18 12 4.33 0.53
 2 18 12 4.29 0.53
 -2 18 12 4.19 0.53
 -2 18 13 2.82 0.46
 2 18 13 1.61 0.3
 2 18 13 3.44 0.48
 -2 18 13 1.93 0.33
 -2 18 14 -0.05 0.23
 2 18 14 -0.17 0.22
 2 18 14 -0.27 0.28
 -2 18 14 0.01 0.17
 -2 18 15 0.46 0.23
 2 18 15 0.44 0.22
 -2 18 15 0.22 0.22
 -2 18 16 0.68 0.26
 -2 18 16 0.56 0.26
 2 18 16 0.49 0.21
 -2 18 17 -0.35 0.26
 2 18 17 -0.04 0.16
 -2 18 17 0.16 0.16
 -2 18 18 7.42 0.64
 2 18 18 7.3 0.63
 2 18 19 2.56 0.36
 -2 -20 0 4.87 0.4
 -2 -20 -1 4.94 0.41
 -2 -20 1 4.72 0.4
 -2 -20 -2 0.17 0.09
 -2 -20 2 0.21 0.13
 -2 -20 3 32.89 1.17
 2 20 3 36.2 1.28
 -2 20 -4 0.19 0.14
 -2 -20 4 0.11 0.14
 2 20 4 0.05 0.16
 -2 -20 5 4.18 0.48
 -2 20 -5 6.09 0.52
 2 20 5 5.91 0.55
 -2 20 5 5.52 0.53
 -2 20 6 0.23 0.19
 -2 20 -6 0.25 0.21
 2 20 6 0 0.18
 -2 -20 6 0.15 0.16
 2 20 7 1.47 0.29
 -2 -20 7 1.46 0.33
 -2 20 7 1.63 0.3
 2 20 7 1.35 0.27
 -2 20 8 7.49 0.59
 -2 -20 8 8.33 0.77
 2 20 8 8.61 0.67
 2 20 8 8.11 0.67
 2 20 9 20.34 1.07
 2 20 9 17.62 0.93
 -2 20 9 18.45 0.97
 -2 20 9 18.54 0.96
 -2 -20 9 18.93 1.22
 -2 20 10 25.64 1.18
 -2 20 10 25.07 1.17
 2 20 10 27.15 1.25
 2 20 10 24.49 1.16
 2 20 11 2.17 0.39
 2 20 11 2.34 0.39
 -2 20 11 2.75 0.43
 -2 20 11 2.45 0.37
 2 20 12 12.74 0.89
 -2 20 12 13.83 0.93
 -2 20 12 13.78 0.91
 2 20 12 14.39 0.96
 -2 20 13 -0.1 0.25
 2 20 13 0.57 0.21
 2 20 13 -0.04 0.19
 -2 20 13 0.22 0.17
 -2 20 14 -0.13 0.15
 2 20 14 -0.17 0.24
 -2 20 14 -0.32 0.28
 2 20 14 -0.32 0.23
 2 20 15 -0.05 0.16
 2 20 15 0.17 0.16
 -2 20 15 0.42 0.24
 -2 20 15 0.28 0.18
 -2 20 16 0.38 0.2
 2 20 16 0.26 0.16
 -2 20 16 0.42 0.23
 -2 20 17 -0.46 0.24
 -2 20 17 -0.3 0.21
 2 20 17 -0.39 0.22
 2 20 18 3 0.4
 -2 -22 0 0.39 0.15
 2 22 0 0.17 0.15
 -2 22 0 0.17 0.16
 -2 22 1 13.35 0.79
 2 22 -1 13.26 0.78
 2 22 1 13.5 0.77
 -2 22 -1 12.77 0.77
 -2 -22 1 15.68 0.82
 -2 -22 -1 14.73 0.76
 -2 -22 -2 0.09 0.1
 -2 22 2 -0.06 0.13
 2 22 2 0.03 0.19
 2 22 -2 0.03 0.13
 -2 -22 2 -0.06 0.13
 -2 22 -2 -0.03 0.17
 -2 22 3 11.97 0.78
 -2 22 -3 11.87 0.74
 2 22 -3 11.75 0.74
 -2 -22 -3 14.29 0.8
 2 22 3 13.24 0.81
 -2 -22 3 15.37 0.89
 -2 -22 4 4.35 0.49
 -2 22 -4 3.51 0.43
 2 22 4 3.77 0.47
 2 22 -4 3.54 0.42
 -2 22 4 3.72 0.47
 -2 22 5 29.27 1.22
 2 22 5 28.87 1.22
 -2 22 -5 26.78 1.16
 -2 -22 5 30.57 1.37
 2 22 6 1.52 0.28
 -2 22 -6 1.21 0.27
 -2 22 6 1.72 0.34
 2 22 7 1.2 0.24
 -2 22 7 1.26 0.27
 -2 -22 7 1.58 0.35
 2 22 8 0.17 0.16
 -2 22 8 -0.15 0.22
 -2 -22 8 0.28 0.22
 2 22 9 0.04 0.14
 -2 -22 9 0.24 0.2
 -2 22 9 0.12 0.16
 2 22 10 3.33 0.46
 2 22 10 2.84 0.43
 -2 22 10 3.3 0.47
 -2 22 11 1.28 0.33
 2 22 11 0.89 0.26
 2 22 11 1.1 0.26
 2 22 12 1.16 0.27
 -2 22 12 1.35 0.32
 -2 22 12 1.55 0.33
 2 22 12 1.65 0.36
 2 22 13 0.04 0.17
 2 22 13 0.8 0.27
 -2 22 13 0.35 0.23
 -2 22 13 0.72 0.23
 2 22 14 5.25 0.61
 -2 22 14 5.46 0.6
 2 22 14 3.87 0.51
 -2 22 14 4.5 0.51
 2 22 15 0.14 0.19
 -2 22 15 -0.05 0.17
 2 22 15 0.23 0.17
 -2 22 15 0.07 0.19
 -2 22 16 2.33 0.38
 2 22 16 3.14 0.45
 -2 22 16 2.4 0.4
 -2 22 17 -0.26 0.2
 2 22 17 0.17 0.16
 2 22 18 0.2 0.14
 -2 24 0 0.02 0.17
 2 24 0 -0.02 0.15
 -2 24 1 1.71 0.31
 2 24 -1 1.55 0.31
 2 24 1 1.13 0.27
 -2 24 -1 1.24 0.28
 2 24 2 1.4 0.29
 2 24 -2 1.34 0.28
 -2 24 -2 1.37 0.28
 -2 24 2 1.12 0.26
 -2 24 -3 43.1 1.5
 2 24 3 43.73 1.51
 -2 24 3 46.23 1.58
 -2 -24 -3 46.63 1.5
 2 24 -3 44.71 1.51
 -2 24 4 16.93 0.98
 2 24 4 17.34 0.98
 -2 24 -4 17.74 0.98
 2 24 -4 16.91 0.96
 2 24 5 49.86 1.67
 2 24 -5 49.59 1.67
 -2 24 5 52.12 1.72
 -2 24 -5 51.48 1.72
 2 24 6 33.32 1.39
 -2 24 -6 31.52 1.4
 -2 24 6 33.03 1.37
 -2 24 7 18.58 1.03
 2 24 7 19.16 1.06
 2 24 8 9.58 0.76
 -2 24 8 10.39 0.72
 2 24 9 0.46 0.24
 -2 24 9 0.28 0.2
 2 24 10 0.06 0.16
 -2 24 10 0.23 0.2
 2 24 11 1.46 0.31
 -2 24 11 1.17 0.27
 2 24 11 1.15 0.3
 -2 24 12 0.93 0.26
 2 24 12 1.19 0.31
 2 24 12 0.69 0.22
 2 24 13 1.66 0.35
 -2 24 13 1.78 0.33
 2 24 13 2.08 0.38
 2 24 14 3.48 0.47
 2 24 14 4.49 0.56
 -2 24 14 3.8 0.49
 2 24 15 1.19 0.31
 2 24 15 1.77 0.36
 -2 24 15 1.3 0.33
 2 24 16 9.19 0.72
 -2 24 16 7.54 0.67
 2 24 17 0.51 0.19
 -2 24 17 0.03 0.18
 2 26 0 0.25 0.2
 -2 26 0 -0.15 0.25
 2 26 1 5.25 0.55
 2 26 -1 4.96 0.53
 -2 26 -1 5.11 0.54
 -2 26 1 3.96 0.41
 2 26 -2 8.18 0.68
 -2 26 2 7.13 0.64
 2 26 2 9.01 0.72
 -2 26 -2 7.95 0.69
 2 26 -3 55.05 1.76
 -2 26 -3 52.45 1.74
 2 26 3 54.16 1.76
 -2 26 3 56.07 1.82
 2 26 4 43.51 1.62
 -2 26 4 45.07 1.66
 -2 26 -4 44.57 1.63
 2 26 -4 46.03 1.65
 -2 26 -5 81.58 2.26
 2 26 5 77.03 2.17
 2 26 -5 79.23 2.21
 -2 26 5 81.95 2.26
 2 26 6 30.76 1.39
 2 26 -6 32.37 1.45
 -2 26 -6 33.93 1.53
 -2 26 6 31.89 1.42
 2 26 7 50.2 1.76
 -2 26 7 51.76 1.79
 2 26 8 5.85 0.61
 -2 26 8 5.45 0.54
 2 26 9 0.18 0.2
 -2 26 9 -0.05 0.18
 -2 26 10 2.4 0.44
 2 26 10 2.33 0.44
 -2 26 11 0.94 0.3
 2 26 11 1.39 0.34
 -2 26 12 8.85 0.74
 2 26 12 8.85 0.79
 -2 26 13 0.86 0.2
 2 26 13 0.98 0.28
 -2 26 14 21.68 1.14
 2 26 14 17.58 1.04
 -2 26 15 2.3 0.4
 2 26 15 1.96 0.35
 -2 26 16 9.99 0.75
 -2 26 17 0.31 0.15
 -2 28 0 0.62 0.22
 2 28 0 0.98 0.27
 2 28 -1 1.57 0.34
 -2 28 1 1.21 0.21
 -2 28 -1 1.37 0.31
 2 28 1 1.5 0.34
 -2 28 -2 7.51 0.69
 -2 28 2 7.11 0.67
 2 28 2 6.96 0.66
 2 28 -2 7.23 0.67
 -2 28 3 36.66 1.54
 2 28 3 33.05 1.46
 2 28 -3 33.29 1.45
 -2 28 -3 33.71 1.47
 -2 28 4 29.64 1.41
 2 28 4 27.9 1.37
 -2 28 -4 30.11 1.41
 2 28 -4 29.29 1.4
 2 28 -5 26.54 1.35
 2 28 5 25.02 1.29
 -2 28 -5 25.95 1.35
 -2 28 5 26.08 1.37
 2 28 -6 32 1.5
 2 28 6 29.94 1.44
 -2 28 6 29.3 1.43
 2 28 7 8.72 0.79
 -2 28 7 8.57 0.79
 2 28 8 0.39 0.23
 -2 28 8 0.38 0.19
 2 28 9 -0.02 0.18
 -2 28 9 0.21 0.18
 2 28 10 0.25 0.22
 -2 28 10 0.3 0.25
 -2 28 11 1.1 0.29
 2 28 11 1.41 0.36
 2 28 12 5.64 0.62
 -2 28 12 5.6 0.59
 -2 28 13 3.61 0.46
 2 28 13 3.02 0.44
 2 28 14 8.91 0.74
 -2 28 14 10.06 0.78
 -2 28 15 4.74 0.53
 2 28 15 3.37 0.44
 -2 28 16 4.53 0.5
 -2 30 0 6.17 0.65
 2 30 0 6.61 0.69
 2 30 1 0.59 0.28
 -2 30 1 0.21 0.23
 2 30 -1 0.28 0.26
 -2 30 -1 0.31 0.23
 2 30 2 2.06 0.39
 -2 30 -2 2.46 0.42
 -2 30 2 2.62 0.42
 2 30 -2 2.06 0.38
 -2 30 -3 11.8 0.95
 -2 30 3 11.52 0.94
 2 30 3 11.66 0.93
 2 30 -3 11.64 0.91
 2 30 -4 4.27 0.56
 -2 30 4 4.09 0.59
 2 30 4 4.6 0.61
 -2 30 -4 4.49 0.61
 -2 30 -5 10.97 0.94
 2 30 5 12.67 0.97
 2 30 -5 12.44 0.96
 -2 30 5 12.31 0.96
 -2 30 6 4.24 0.58
 2 30 6 4.53 0.6
 2 30 -6 4.85 0.62
 -2 30 7 0.22 0.21
 2 30 7 0.01 0.27
 -2 30 8 0.19 0.15
 -2 30 8 -0.19 0.33
 2 30 8 0.31 0.21
 2 30 9 4.99 0.61
 2 30 9 4.47 0.55
 -2 30 9 5 0.59
 2 30 10 3.71 0.54
 -2 30 10 3.6 0.54
 -2 30 11 0.42 0.2
 2 30 11 0.8 0.32
 2 30 12 0.64 0.24
 -2 30 12 0.48 0.19
 -2 30 13 1.26 0.29
 2 30 13 1.38 0.31
 -2 30 14 3.64 0.47
 2 30 14 3.39 0.44
 2 30 15 1.5 0.29
 -2 30 15 2.05 0.38
 -2 30 16 2 0.34
 2 32 0 33.75 1.57
 -2 32 0 33.72 1.59
 2 32 1 18.57 1.18
 2 32 -1 17.31 1.15
 -2 32 -1 17.98 1.2
 -2 32 1 17.26 1.18
 -2 32 -2 2.84 0.47
 -2 32 2 2.17 0.49
 2 32 -2 1.83 0.39
 2 32 2 2.5 0.47
 -2 32 3 4.77 0.67
 2 32 -3 5.62 0.68
 2 32 3 5.4 0.65
 -2 32 -3 5.18 0.67
 -2 32 -4 1.08 0.36
 2 32 -4 0.93 0.34
 2 32 4 1.13 0.35
 -2 32 4 1.15 0.36
 -2 32 5 1.48 0.38
 -2 32 -5 1.56 0.44
 2 32 5 0.77 0.28
 2 32 -5 1.25 0.35
 2 32 6 1.28 0.38
 -2 32 6 0.7 0.27
 2 32 -6 1.45 0.43
 2 32 7 0.28 0.21
 -2 32 7 0.25 0.24
 -2 32 8 8.74 0.75
 2 32 8 8.88 0.82
 -2 32 8 9.4 0.81
 2 32 9 13.13 0.95
 2 32 9 13.35 0.99
 -2 32 9 11.76 0.91
 2 32 10 16.71 1.09
 -2 32 10 16.53 1.08
 2 32 11 6.67 0.7
 -2 32 11 7.12 0.69
 2 32 12 0.91 0.29
 -2 32 12 0.81 0.24
 -2 32 13 -0.03 0.18
 2 32 13 0.29 0.19
 -2 32 14 0.23 0.21
 2 32 14 -0.13 0.17
 -2 32 15 0.27 0.19
 2 34 0 87.14 2.59
 -2 34 0 89.41 2.65
 -2 34 -1 18.51 1.28
 2 34 -1 19.42 1.3
 -2 34 1 19.91 1.3
 2 34 1 19.59 1.29
 -2 34 2 68.11 2.33
 -2 34 -2 65.47 2.3
 2 34 -2 67.66 2.3
 2 34 2 63.94 2.23
 2 34 3 1.81 0.48
 -2 34 -3 0.85 0.32
 -2 34 3 1.57 0.41
 2 34 -3 1.51 0.46
 2 34 4 2 0.42
 -2 34 4 2.24 0.44
 -2 34 -4 2.12 0.43
 2 34 -4 2.27 0.48
 -2 34 -5 2.58 0.56
 -2 34 5 1.65 0.44
 2 34 -5 1.78 0.43
 2 34 5 1.81 0.44
 2 34 -6 0.75 0.32
 -2 34 6 0.41 0.24
 2 34 6 0.41 0.28
 -2 34 7 2.38 0.43
 -2 34 7 2.92 0.5
 2 34 7 3.56 0.55
 2 34 8 12.85 1
 -2 34 8 11.08 0.9
 -2 34 8 12.54 0.95
 2 34 9 24.22 1.34
 -2 34 9 25.21 1.34
 2 34 9 25.53 1.36
 -2 34 10 20.07 1.18
 2 34 10 19.46 1.17
 2 34 11 12.33 0.92
 -2 34 11 13.6 0.94
 -2 34 12 6.67 0.63
 2 34 12 6.26 0.62
 -2 34 13 3.04 0.42
 2 34 13 2.11 0.37
 -2 34 14 0.43 0.18
 2 34 14 0.2 0.13
 -2 36 0 89.84 2.73
 2 36 0 82.82 2.58
 2 36 -1 29.39 1.62
 2 36 1 31.49 1.68
 -2 36 -1 29.38 1.63
 -2 36 1 32.32 1.68
 2 36 2 27.81 1.53
 2 36 -2 29.14 1.57
 -2 36 -2 27.31 1.53
 -2 36 2 29.66 1.61
 -2 36 -3 3.27 0.57
 2 36 3 4.59 0.66
 2 36 -3 3.68 0.59
 -2 36 3 3.94 0.63
 -2 36 4 3.6 0.6
 2 36 4 3.28 0.56
 -2 36 -4 3.79 0.65
 2 36 -4 4.15 0.6
 2 36 5 0.79 0.29
 -2 36 5 0.84 0.32
 2 36 -5 1.16 0.36
 2 36 6 0.48 0.24
 -2 36 6 0.3 0.27
 2 36 -6 0.31 0.23
 -2 36 7 0.14 0.21
 -2 36 7 0.44 0.23
 2 36 7 0.22 0.2
 2 36 8 14.73 1.06
 -2 36 8 12.54 0.95
 -2 36 8 15.67 1.06
 2 36 9 18.85 1.17
 2 36 9 17.65 1.11
 -2 36 9 18.96 1.15
 -2 36 10 14.34 0.98
 2 36 10 12.82 0.95
 -2 36 11 17.87 1.06
 2 36 11 16.08 1.01
 -2 36 12 3.53 0.46
 2 36 12 3.37 0.46
 2 36 13 3.3 0.41
 -2 36 13 4.49 0.5
 -2 36 14 0.26 0.17
 2 38 0 126.44 3.21
 -2 38 0 125.25 3.36
 -2 38 1 1.77 0.57
 2 38 1 1.1 0.39
 2 38 -1 1.42 0.48
 -2 38 -1 0.55 0.34
 -2 38 -2 6.93 0.82
 2 38 2 6.01 0.71
 2 38 -2 6.94 0.79
 -2 38 2 7.11 0.82
 -2 38 -3 0.39 0.36
 2 38 -3 0 0.24
 -2 38 3 -0.38 0.34
 2 38 3 -0.03 0.25
 2 38 -4 1.28 0.39
 2 38 4 1.41 0.44
 -2 38 4 0.81 0.35
 2 38 -5 -0.17 0.26
 -2 38 5 0.43 0.26
 2 38 5 0.16 0.25
 -2 38 6 1.6 0.39
 -2 38 6 1.18 0.38
 2 38 -6 0.81 0.29
 2 38 6 1.36 0.38
 -2 38 7 0.31 0.2
 2 38 7 0.67 0.26
 -2 38 7 0.85 0.31
 2 38 8 2.94 0.52
 -2 38 8 2.13 0.38
 -2 38 8 3.28 0.51
 2 38 8 2.66 0.44
 2 38 9 7.52 0.73
 2 38 9 7.9 0.73
 -2 38 9 7.82 0.75
 -2 38 10 5.95 0.64
 2 38 10 6.12 0.64
 -2 38 11 7.34 0.66
 2 38 11 6.49 0.61
 2 38 12 0.79 0.22
 -2 38 12 1.1 0.28
 -2 38 13 0.36 0.16
 2 40 0 1.34 0.45
 -2 40 0 1.35 0.48
 -2 40 -1 0.16 0.35
 2 40 1 0.25 0.26
 2 40 -1 0.69 0.37
 -2 40 1 0.81 0.38
 -2 40 -2 0.66 0.28
 2 40 -2 0.37 0.25
 -2 40 2 0.5 0.28
 2 40 2 0.38 0.29
 -2 40 3 0.73 0.28
 2 40 3 1.1 0.4
 2 40 -3 0.6 0.29
 2 40 -4 5.98 0.72
 -2 40 4 7.27 0.81
 2 40 4 6.79 0.75
 2 40 -5 3.43 0.56
 2 40 5 3.33 0.56
 -2 40 5 3.95 0.64
 -2 40 6 5.11 0.65
 2 40 6 4.17 0.59
 -2 40 6 5.03 0.64
 -2 40 7 1.12 0.32
 -2 40 7 0.46 0.29
 2 40 7 0.33 0.19
 2 40 8 -0.09 0.27
 -2 40 8 0.53 0.21
 2 40 8 0.43 0.22
 -2 40 9 0.76 0.29
 2 40 9 0.8 0.27
 2 40 9 0.78 0.24
 2 40 10 0.49 0.23
 -2 40 10 0.76 0.23
 -2 40 11 0.22 0.14
 2 40 11 0.47 0.17
 -2 40 12 0.06 0.12
 -2 42 0 0.44 0.3
 2 42 0 0.58 0.27
 2 42 -1 0.47 0.26
 -2 42 -1 0.39 0.38
 -2 42 1 0.46 0.35
 2 42 1 0.12 0.25
 -2 42 2 3.07 0.54
 2 42 2 3.33 0.56
 2 42 -2 2.29 0.45
 2 42 -3 1.07 0.38
 2 42 3 1.76 0.44
 -2 42 3 1.8 0.45
 2 42 -4 22.63 1.36
 -2 42 4 25 1.42
 2 42 4 23.46 1.35
 -2 42 5 6.11 0.75
 2 42 5 6.64 0.72
 -2 42 6 9.94 0.87
 2 42 6 9.14 0.81
 -2 42 6 10.94 0.87
 2 42 7 4.1 0.54
 2 42 7 4.9 0.59
 -2 42 7 4.46 0.56
 -2 42 8 0.9 0.29
 2 42 8 0.97 0.26
 2 42 8 0.98 0.27
 -2 42 9 0 0.15
 2 42 9 0 0.15
 2 42 10 0.02 0.14
 -2 42 10 -0.15 0.18
 2 44 0 1.21 0.36
 2 44 -1 0.18 0.29
 -2 44 1 0.25 0.28
 2 44 1 0.17 0.22
 -2 44 2 7.83 0.84
 2 44 2 7.07 0.73
 2 44 -2 7.22 0.74
 2 44 -3 3.22 0.54
 -2 44 3 3.31 0.55
 2 44 3 3.66 0.54
 2 44 4 21.24 1.2
 -2 44 4 22.6 1.22
 -2 44 4 22.03 1.3
 2 44 5 8.01 0.75
 -2 44 5 8.7 0.79
 -2 44 6 12.48 0.89
 2 44 6 13.2 0.93
 2 44 6 12.37 0.89
 -2 44 7 4.82 0.57
 2 44 7 5.97 0.62
 2 44 7 4.72 0.55
 -2 44 8 1.17 0.27
 2 44 8 1.18 0.27
 2 44 8 1.87 0.36
 2 44 9 1.04 0.27
 -2 44 9 0.65 0.19
 2 46 0 -0.06 0.24
 2 46 -1 -0.26 0.29
 2 46 1 -0.23 0.21
 2 46 2 1.3 0.33
 -2 46 2 1.28 0.31
 2 46 -2 0.66 0.26
 -2 46 3 1.79 0.36
 2 46 3 2.23 0.41
 -2 46 4 6.15 0.61
 2 46 4 5.49 0.58
 2 46 5 5.42 0.59
 2 46 5 5.92 0.6
 -2 46 5 4.8 0.54
 -2 46 6 7.43 0.66
 2 46 6 7.97 0.69
 2 46 6 6.69 0.62
 -2 46 7 3.75 0.45
 2 46 7 4.96 0.52
 2 48 0 3.67 0.48
 2 48 1 0.7 0.24
 -2 48 1 0.53 0.23
 -2 48 2 0.35 0.18
 2 48 2 0.15 0.19
 2 48 3 -0.15 0.15
 -2 48 3 -0.03 0.15
 2 48 4 0.29 0.18
 2 48 4 0.82 0.23
 -3 -1 0 0.17 0.05
 -3 1 0 0.2 0.05
 -3 -1 1 58.95 0.75
 -3 1 1 60.23 0.7
 -3 -1 2 19.17 0.48
 -3 1 2 19.84 0.47
 -3 -1 3 94.64 1.19
 -3 1 3 91.41 1.15
 -3 -1 4 8.97 0.4
 -3 1 4 9.54 0.42
 -3 1 5 61.06 1.18
 -3 -1 5 60.78 1.17
 -3 1 6 2.44 0.27
 -3 -1 6 2.38 0.27
 -3 1 7 1.35 0.22
 -3 -1 7 1.54 0.22
 -3 -1 8 16.39 0.77
 -3 1 8 16.1 0.76
 -3 -1 9 11.19 0.68
 -3 -1 9 13.76 0.78
 3 1 9 11.2 0.69
 3 -1 9 12.15 0.74
 -3 1 9 12.51 0.76
 -3 -1 9 12.05 0.76
 -3 1 9 12.11 0.75
 -3 1 10 17.5 0.97
 -3 -1 10 16.07 0.89
 -3 -1 10 16.06 0.95
 3 -1 10 15.79 0.88
 3 1 10 15.83 0.86
 -3 1 10 16.67 0.91
 3 1 11 4.08 0.49
 -3 1 11 4.85 0.52
 -3 1 11 5.22 0.61
 -3 -1 11 4.13 0.5
 3 -1 11 4.95 0.52
 3 -1 12 16.45 0.97
 -3 -1 12 17.03 1
 3 1 12 16.88 0.96
 -3 1 12 20.55 1.2
 -3 1 12 17.72 1.02
 3 1 13 1.04 0.29
 3 -1 13 0.98 0.31
 -3 -1 13 0.95 0.28
 -3 1 13 1.23 0.31
 3 -1 14 9.88 0.78
 -3 -1 14 11.35 0.88
 -3 1 14 11.14 0.88
 3 1 14 10.6 0.79
 -3 1 15 0.88 0.35
 3 1 15 0.16 0.18
 -3 -1 15 0.82 0.34
 3 -1 15 0.39 0.22
 -3 1 16 12.79 0.94
 -3 -1 16 13.9 0.98
 3 -1 16 11.3 0.85
 3 1 16 12.37 0.87
 3 -1 17 0.67 0.25
 3 1 17 0.6 0.23
 -3 -1 17 1.21 0.35
 -3 1 17 0.96 0.3
 3 1 18 3.92 0.48
 3 -1 18 4.09 0.49
 -3 1 18 3.94 0.52
 3 -1 19 1.01 0.27
 3 1 19 1.48 0.31
 3 1 20 1.2 0.24
 3 -1 20 1.25 0.25
 -3 -3 0 1.11 0.12
 -3 3 0 1.15 0.09
 -3 -3 1 13.37 0.38
 -3 3 1 13.27 0.31
 -3 -3 2 10.54 0.38
 -3 3 2 11.21 0.35
 -3 -3 3 134.53 1.46
 -3 3 3 128.46 1.38
 -3 3 4 3.42 0.26
 -3 -3 4 3.06 0.26
 -3 3 5 1.3 0.18
 -3 -3 5 1.44 0.2
 -3 3 6 6.33 0.42
 -3 -3 6 5.38 0.41
 -3 -3 7 9.86 0.57
 -3 3 7 11.25 0.59
 -3 -3 8 0.84 0.21
 -3 3 9 0.98 0.24
 3 3 9 0.56 0.15
 3 -3 9 0.75 0.2
 -3 -3 9 0.91 0.23
 -3 3 9 0.86 0.23
 -3 -3 9 0.9 0.21
 3 -3 10 7.76 0.65
 -3 -3 10 6.97 0.59
 3 3 10 7.2 0.59
 -3 3 10 7.91 0.65
 -3 3 10 8.21 0.65
 -3 -3 11 0.89 0.25
 -3 3 11 1.17 0.32
 3 3 11 1.09 0.25
 3 -3 11 1.21 0.28
 -3 3 11 1.29 0.31
 3 3 12 4.62 0.51
 -3 -3 12 4.62 0.54
 -3 3 12 5.96 0.66
 3 -3 12 4.45 0.52
 -3 3 12 5.13 0.55
 3 -3 13 0.13 0.15
 -3 3 13 0.35 0.33
 3 3 13 0.14 0.17
 -3 3 13 -0.04 0.2
 -3 -3 13 0.36 0.24
 3 3 14 3.18 0.45
 3 -3 14 2.46 0.38
 -3 3 14 3.48 0.51
 -3 -3 14 3.21 0.52
 3 3 15 0.49 0.21
 3 -3 15 -0.07 0.2
 -3 3 15 0.28 0.22
 -3 -3 15 0.4 0.27
 3 3 16 1.56 0.31
 3 -3 16 1.22 0.31
 -3 -3 16 1.78 0.42
 -3 3 16 1.48 0.31
 3 -3 17 0.14 0.15
 3 3 17 0.18 0.2
 -3 3 17 0.16 0.17
 -3 -3 17 0.1 0.22
 3 3 18 3.19 0.44
 -3 3 18 2.93 0.45
 3 -3 18 3.16 0.44
 3 -3 19 0.33 0.19
 3 3 19 0.23 0.18
 3 3 20 -0.02 0.1
 3 -3 20 0.29 0.15
 -3 5 0 11.44 0.22
 -3 -5 0 11.09 0.36
 -3 5 1 53.11 0.61
 -3 -5 1 47.61 0.77
 -3 -5 2 8.87 0.36
 -3 5 2 8.72 0.31
 -3 5 3 127.48 1.37
 -3 -5 3 137.21 1.53
 -3 -5 4 42.88 0.94
 -3 5 4 46.99 0.93
 -3 5 5 0.27 0.12
 -3 -5 5 0.21 0.12
 -3 -5 6 0.17 0.11
 -3 5 6 0.22 0.11
 -3 -5 7 1.85 0.26
 -3 -5 8 1.18 0.22
 -3 -5 9 5.52 0.49
 3 5 9 5.54 0.49
 -3 5 9 5.85 0.51
 3 -5 9 6.34 0.54
 -3 5 9 5.93 0.54
 -3 -5 9 6.78 0.57
 -3 5 10 1.96 0.33
 3 -5 10 3.14 0.42
 3 5 10 2.17 0.34
 -3 -5 10 2.68 0.35
 -3 -5 10 2.24 0.37
 -3 5 10 2.6 0.38
 3 5 11 0.77 0.21
 3 -5 11 1.46 0.31
 -3 5 11 0.89 0.27
 -3 5 11 1.36 0.34
 -3 -5 11 1.2 0.29
 3 -5 12 7.65 0.67
 3 5 12 7.19 0.62
 -3 -5 12 7.92 0.71
 -3 5 12 8.53 0.79
 -3 5 12 7.87 0.69
 3 -5 13 -0.06 0.19
 3 5 13 -0.01 0.15
 -3 5 13 0.39 0.28
 -3 -5 13 0.64 0.28
 -3 5 13 0.04 0.16
 -3 -5 14 3.03 0.48
 3 -5 14 2.05 0.36
 -3 5 14 2.77 0.58
 -3 5 14 2.49 0.42
 3 5 14 2.64 0.44
 3 5 15 0.37 0.18
 3 -5 15 -0.07 0.21
 -3 -5 15 0.72 0.31
 -3 5 15 0.4 0.19
 3 -5 16 -0.1 0.18
 3 5 16 -0.01 0.16
 -3 5 16 -0.05 0.27
 -3 -5 16 0.27 0.23
 3 5 17 0.24 0.17
 3 -5 17 0.09 0.15
 -3 5 17 0.22 0.19
 -3 5 18 0.43 0.22
 3 -5 18 0.39 0.19
 3 5 18 0.06 0.13
 3 -5 19 0.54 0.22
 3 5 19 0.29 0.16
 3 5 20 0.2 0.13
 -3 -7 0 26.8 0.6
 -3 7 1 149.3 0.9
 -3 -7 1 151.33 1.47
 -3 -7 2 2.33 0.21
 -3 7 2 1.81 0.14
 -3 7 3 108.73 1.23
 -3 -7 3 113.27 1.45
 -3 7 4 55.88 1
 -3 -7 4 54.44 1.11
 -3 -7 5 0.32 0.13
 -3 -7 6 5.1 0.41
 -3 -7 7 5.25 0.44
 -3 -7 8 1.6 0.27
 -3 7 9 1.44 0.25
 -3 -7 9 1.34 0.27
 3 -7 9 1.17 0.25
 -3 7 9 1.15 0.25
 -3 -7 9 1.62 0.29
 3 7 9 1.16 0.22
 3 7 10 27.97 1.18
 -3 -7 10 25.04 1.12
 -3 -7 10 25.11 1.17
 -3 7 10 28.3 1.19
 -3 7 10 26.67 1.16
 3 -7 10 24.06 1.1
 3 -7 11 30.8 1.28
 -3 -7 11 30.9 1.33
 -3 7 11 22.94 1.13
 -3 7 11 25.85 1.22
 3 7 11 23.16 1.12
 3 7 12 8.32 0.68
 -3 7 12 8.81 0.8
 -3 7 12 8.87 0.73
 -3 -7 12 8.35 0.75
 3 -7 12 7.84 0.67
 3 7 13 4.48 0.53
 -3 7 13 5.58 0.69
 3 -7 13 5.4 0.57
 -3 7 13 4.72 0.57
 -3 -7 13 6.56 0.68
 -3 7 14 9.96 0.81
 -3 7 14 12.61 1.04
 3 -7 14 9.71 0.79
 -3 -7 14 10.3 0.86
 3 7 14 10.2 0.8
 3 7 15 1.48 0.32
 -3 -7 15 1.82 0.42
 3 -7 15 1.75 0.37
 -3 7 15 1.56 0.37
 -3 7 16 0.85 0.29
 3 7 16 0.55 0.23
 3 -7 16 1.18 0.3
 -3 -7 16 1.1 0.34
 3 7 17 0.25 0.2
 -3 7 17 0.51 0.26
 3 -7 17 0.33 0.2
 3 -7 18 3.44 0.46
 3 7 18 3.12 0.43
 -3 7 18 3.33 0.47
 3 -7 19 0.89 0.25
 3 7 19 0.86 0.21
 3 7 20 1.37 0.25
 -3 -9 0 60.58 0.94
 -3 -9 1 12.43 0.45
 -3 -9 2 10.52 0.44
 -3 -9 3 55.31 1.08
 -3 -9 4 23.76 0.78
 -3 -9 5 18.1 0.72
 -3 -9 6 1.02 0.22
 -3 -9 7 26.11 0.98
 -3 -9 8 7.56 0.58
 -3 9 8 8.55 0.6
 -3 9 8 8.35 0.58
 -3 9 9 11.61 0.72
 -3 -9 9 11.64 0.74
 -3 -9 9 12.18 0.8
 3 -9 9 10.12 0.68
 -3 9 9 9.73 0.66
 3 9 9 9.23 0.66
 3 -9 10 30.54 1.22
 -3 -9 10 36.7 1.43
 -3 -9 10 34.93 1.37
 -3 9 10 37.76 1.36
 3 9 10 40.67 1.42
 3 9 10 31.5 1.3
 -3 9 10 39.66 1.42
 -3 9 11 18.28 1.02
 -3 9 11 16.92 0.98
 3 -9 11 19.37 1.02
 3 9 11 17.07 0.98
 -3 9 12 28.01 1.33
 3 9 12 28.58 1.27
 3 -9 12 25.69 1.2
 -3 -9 12 26.17 1.28
 -3 9 12 27.91 1.29
 -3 -9 13 6.53 0.68
 -3 9 13 6.45 0.72
 3 9 13 5.76 0.6
 3 -9 13 6.27 0.63
 -3 9 13 6.08 0.64
 -3 9 14 9.14 0.88
 3 -9 14 6.7 0.66
 3 9 14 8.86 0.75
 -3 -9 14 5.77 0.64
 -3 9 14 8.74 0.77
 -3 -9 15 -0.14 0.25
 3 -9 15 0.28 0.19
 -3 9 15 0.25 0.23
 3 9 15 -0.16 0.34
 -3 9 16 3.7 0.55
 3 -9 16 4.23 0.54
 3 9 16 3.32 0.46
 3 -9 17 5.91 0.62
 -3 9 17 6.14 0.65
 3 9 17 6.37 0.64
 3 9 18 0.67 0.22
 -3 9 18 0.67 0.25
 3 -9 18 0.28 0.17
 3 9 19 2.33 0.35
 3 9 20 1.97 0.3
 -3 -11 0 19 0.57
 -3 -11 1 24.03 0.66
 -3 -11 2 2.43 0.23
 -3 -11 3 9.71 0.48
 -3 -11 4 17.41 0.7
 -3 -11 5 3.06 0.33
 -3 -11 6 21.75 0.89
 -3 -11 7 2.79 0.35
 -3 11 8 7.6 0.57
 -3 11 8 7.19 0.55
 -3 -11 8 6.85 0.56
 -3 -11 9 29.77 1.22
 3 11 9 25.71 1.11
 -3 11 9 27.47 1.13
 -3 -11 9 30.58 1.31
 3 11 9 28.17 1.16
 -3 11 9 29.42 1.16
 3 11 10 5.65 0.57
 3 11 10 8.06 0.65
 -3 11 10 7.71 0.63
 -3 11 10 8.03 0.64
 -3 -11 10 7.26 0.64
 -3 -11 10 7.06 0.67
 3 -11 10 5.52 0.52
 3 11 11 8.46 0.71
 -3 -11 11 10.39 0.82
 -3 11 11 8.86 0.7
 3 11 11 7.75 0.69
 3 -11 11 8.61 0.68
 -3 11 11 8.06 0.69
 3 -11 12 12.92 0.85
 3 11 12 15.73 0.96
 -3 11 12 14.17 0.94
 -3 -11 12 14.03 0.97
 -3 11 12 15.11 0.96
 -3 11 13 2.12 0.42
 -3 11 13 2.1 0.4
 3 11 13 2.35 0.4
 -3 -11 13 2.45 0.42
 3 -11 13 2.58 0.42
 -3 11 14 0.41 0.23
 -3 11 14 0.76 0.36
 3 -11 14 0.3 0.18
 -3 -11 14 -0.04 0.23
 3 11 14 0.51 0.21
 -3 11 15 2.15 0.41
 -3 11 15 2.76 0.53
 3 11 15 1.66 0.28
 3 -11 15 2.21 0.4
 3 11 16 1.94 0.36
 3 -11 16 2.37 0.42
 -3 11 16 2.17 0.42
 -3 11 17 0.79 0.27
 3 11 17 1.04 0.28
 -3 11 18 0.97 0.27
 3 11 18 0.97 0.26
 3 11 19 1.11 0.26
 3 11 20 0.45 0.18
 -3 -13 0 16.1 0.56
 -3 -13 -1 0.47 0.13
 -3 -13 1 0.5 0.11
 -3 -13 2 1.19 0.18
 -3 -13 3 0.5 0.13
 -3 -13 4 0.29 0.13
 -3 -13 5 0.78 0.18
 -3 -13 6 25.44 0.97
 -3 -13 7 2.87 0.36
 -3 13 7 2.98 0.35
 -3 -13 8 2.92 0.38
 -3 13 8 2.8 0.35
 3 13 8 2.59 0.34
 -3 13 8 2.63 0.35
 -3 13 9 0.49 0.21
 -3 13 9 0.28 0.16
 -3 -13 9 0.41 0.19
 -3 -13 9 0.48 0.19
 3 13 9 0.34 0.12
 3 13 9 0.45 0.18
 -3 -13 10 2.03 0.38
 -3 13 10 2.18 0.39
 3 13 10 2.72 0.4
 -3 -13 10 2.37 0.43
 3 13 10 2.16 0.37
 -3 13 10 2.46 0.37
 -3 13 11 0.46 0.18
 -3 13 11 0.03 0.25
 3 13 11 0.3 0.19
 -3 -13 11 0.8 0.3
 3 13 11 0.78 0.26
 -3 -13 12 1.74 0.37
 -3 13 12 1.6 0.33
 3 13 12 1.71 0.32
 3 13 12 1.38 0.31
 -3 13 12 1.65 0.34
 3 13 13 2.8 0.44
 -3 13 13 2.49 0.42
 -3 13 13 2.6 0.44
 3 13 14 0.06 0.23
 -3 13 14 0.45 0.25
 -3 13 14 -0.33 0.23
 -3 13 15 0.42 0.28
 3 13 15 -0.07 0.26
 -3 13 15 -0.02 0.18
 3 13 16 0.46 0.21
 -3 13 16 0.67 0.26
 -3 13 16 0.67 0.32
 -3 13 17 -0.15 0.19
 3 13 17 -0.07 0.19
 -3 13 18 -0.05 0.16
 3 13 18 0.05 0.14
 3 13 19 0.25 0.16
 -3 -15 0 21.12 0.7
 -3 -15 -1 1.56 0.2
 -3 -15 1 1.34 0.19
 -3 -15 2 1.23 0.2
 -3 -15 3 6.47 0.44
 -3 -15 4 27.91 0.99
 -3 -15 5 75.7 1.7
 -3 15 6 25.94 0.93
 -3 -15 6 21.85 0.94
 -3 -15 7 4.84 0.49
 -3 15 7 5.06 0.44
 -3 -15 8 5.57 0.56
 3 15 8 8.47 0.64
 3 15 8 5.84 0.55
 -3 15 8 7.27 0.56
 -3 15 8 6.93 0.55
 -3 -15 9 5.29 0.57
 3 15 9 4.04 0.44
 -3 15 9 4.12 0.45
 3 15 9 4.03 0.47
 -3 15 9 3.62 0.43
 3 15 10 0.07 0.18
 -3 15 10 0.49 0.23
 -3 15 10 0.1 0.15
 -3 -15 10 0.58 0.24
 3 15 10 0.41 0.21
 -3 15 11 0.43 0.19
 3 15 11 0.68 0.22
 3 15 11 0.52 0.22
 -3 15 11 0.49 0.23
 3 15 12 3.59 0.49
 3 15 12 3.19 0.47
 -3 15 12 2.45 0.4
 -3 15 12 3.42 0.49
 3 15 13 5.5 0.62
 3 15 13 4.14 0.5
 -3 15 13 4.89 0.56
 -3 15 13 5.16 0.61
 3 15 14 0.59 0.24
 -3 15 14 0.3 0.24
 -3 15 14 0.96 0.34
 -3 15 15 5.17 0.63
 -3 15 15 5.11 0.63
 3 15 15 4.87 0.58
 3 15 16 1.74 0.4
 -3 15 16 1.47 0.37
 -3 15 16 1.4 0.36
 -3 15 17 2.31 0.39
 3 15 17 2.84 0.44
 3 15 18 0.46 0.18
 3 15 19 0.86 0.23
 -3 -17 0 0.89 0.17
 -3 -17 1 1.29 0.2
 -3 -17 -1 1.42 0.2
 -3 -17 2 1.03 0.2
 -3 -17 3 2.87 0.32
 -3 -17 4 246.51 3.08
 -3 -17 5 48.88 1.45
 3 17 6 23.18 1.05
 -3 -17 6 18.65 0.93
 -3 17 7 26.87 1.04
 3 17 7 22.99 1.04
 3 17 8 23.52 1.09
 -3 17 8 23.95 1.03
 -3 17 8 23.27 1.01
 -3 -17 8 22.53 1.16
 -3 17 9 12.28 0.77
 -3 17 9 10.64 0.73
 3 17 9 11.45 0.76
 3 17 9 12.14 0.82
 -3 -17 10 2.21 0.43
 3 17 10 2.58 0.41
 3 17 10 1.68 0.32
 -3 17 10 2.08 0.36
 -3 17 10 2.38 0.38
 3 17 11 8.12 0.74
 -3 17 11 7.63 0.67
 3 17 11 7.27 0.65
 -3 17 11 7.83 0.68
 3 17 12 1.24 0.31
 -3 17 12 0.72 0.2
 3 17 12 1.09 0.29
 -3 17 12 1.19 0.29
 3 17 13 6.72 0.63
 -3 17 13 6.76 0.67
 -3 17 13 8.13 0.73
 3 17 13 8.7 0.76
 -3 17 14 1.67 0.4
 3 17 14 0.99 0.32
 -3 17 14 1.05 0.29
 -3 17 15 6.92 0.73
 -3 17 15 8.16 0.76
 3 17 15 7.44 0.73
 -3 17 16 1.28 0.36
 3 17 16 1.41 0.36
 -3 17 16 1.37 0.33
 -3 17 17 8.37 0.75
 3 17 17 8.61 0.71
 3 17 18 1.04 0.24
 3 17 19 3.08 0.39
 -3 -19 0 9.69 0.55
 -3 -19 -1 0.66 0.16
 -3 -19 1 0.61 0.14
 -3 -19 -2 27.81 0.98
 -3 -19 2 28.26 1
 -3 -19 3 12.04 0.71
 3 19 4 47.27 1.49
 -3 -19 4 40.77 1.35
 3 19 5 15.14 0.85
 -3 19 -5 14.61 0.83
 -3 -19 6 45.51 1.55
 3 19 6 55.1 1.66
 -3 -19 7 15.15 0.95
 3 19 7 12.57 0.79
 3 19 7 15.74 0.89
 -3 19 7 15.15 0.79
 -3 19 8 18.61 0.91
 3 19 8 20.51 1.03
 -3 -19 8 18.13 1.1
 3 19 8 19.48 1.04
 -3 19 9 7.3 0.61
 -3 -19 9 8.85 0.82
 -3 19 9 6.26 0.57
 3 19 9 7.43 0.66
 3 19 10 0.64 0.2
 -3 19 10 0.61 0.24
 -3 -19 10 1.2 0.36
 3 19 10 0.6 0.25
 -3 19 10 0.67 0.21
 -3 19 11 5.54 0.59
 3 19 11 4.8 0.54
 -3 19 11 6.39 0.62
 3 19 11 6.5 0.67
 3 19 12 1.31 0.33
 -3 19 12 0.99 0.26
 -3 19 12 1.33 0.33
 3 19 12 0.91 0.24
 -3 19 13 3.79 0.46
 3 19 13 3.89 0.48
 -3 19 13 4.76 0.58
 3 19 13 4.34 0.55
 3 19 14 0.34 0.23
 -3 19 14 0.05 0.21
 -3 19 14 0.35 0.23
 -3 19 15 6.13 0.65
 -3 19 15 5.29 0.62
 3 19 15 6.18 0.65
 3 19 16 0.96 0.33
 -3 19 16 0.68 0.24
 -3 19 16 0.81 0.28
 -3 19 17 3.72 0.46
 3 19 17 4.93 0.53
 3 19 18 0.5 0.18
 -3 -21 0 11.26 0.65
 3 21 0 13.14 0.76
 -3 21 0 12.18 0.72
 -3 -21 1 2.11 0.31
 -3 21 -1 1.39 0.27
 -3 -21 -1 1.97 0.28
 3 21 -1 1.58 0.31
 -3 21 1 1.08 0.24
 3 21 1 1.54 0.27
 -3 -21 -2 10.21 0.62
 3 21 2 11.56 0.75
 -3 21 -2 12.65 0.73
 -3 21 2 11.86 0.75
 -3 -21 2 10.73 0.69
 3 21 -2 11.3 0.7
 -3 21 3 4.11 0.46
 -3 -21 -3 5.07 0.49
 -3 21 -3 4.02 0.45
 3 21 3 4.27 0.47
 3 21 -3 3.96 0.42
 -3 -21 3 5.58 0.53
 -3 21 -4 12.16 0.76
 -3 -21 4 10.94 0.76
 3 21 -4 10.91 0.71
 3 21 4 12.58 0.8
 -3 21 4 12.38 0.79
 3 21 5 5.16 0.51
 3 21 -5 4.17 0.46
 -3 -21 5 4.24 0.5
 -3 21 5 4.12 0.45
 -3 21 -5 4.55 0.51
 -3 21 6 13 0.8
 -3 -21 6 11.46 0.87
 -3 21 7 3.83 0.41
 3 21 7 3.47 0.43
 3 21 7 4.32 0.49
 -3 -21 7 3.99 0.55
 3 21 8 0.14 0.15
 3 21 8 0.35 0.18
 -3 21 8 0.23 0.15
 -3 -21 8 0.46 0.23
 -3 -21 9 0.5 0.24
 3 21 9 0.67 0.23
 3 21 9 0.5 0.2
 -3 21 9 0.41 0.2
 -3 -21 10 0.17 0.21
 -3 21 10 0.37 0.22
 3 21 10 0.34 0.17
 3 21 10 0.31 0.17
 3 21 11 0.28 0.18
 -3 21 11 0.76 0.26
 3 21 11 0.26 0.19
 -3 21 11 0.47 0.2
 3 21 12 0.17 0.17
 3 21 12 0.18 0.19
 -3 21 12 0.24 0.2
 -3 21 12 0.1 0.15
 3 21 13 0.19 0.17
 -3 21 13 -0.37 0.32
 3 21 13 -0.13 0.22
 -3 21 13 0.29 0.2
 -3 21 14 -0.16 0.25
 3 21 14 -0.01 0.21
 3 21 14 0.19 0.17
 -3 21 14 0.19 0.18
 -3 21 15 2.02 0.38
 3 21 15 2.67 0.44
 -3 21 15 2.38 0.41
 3 21 16 0.09 0.18
 -3 21 16 -0.08 0.18
 -3 21 16 0.17 0.19
 -3 21 17 1 0.25
 3 21 17 1.05 0.26
 3 21 18 0.16 0.11
 -3 -23 0 47.73 1.48
 3 23 0 48 1.52
 -3 23 0 47.9 1.49
 3 23 -1 0.98 0.28
 -3 23 1 0.56 0.17
 -3 -23 1 0.51 0.2
 3 23 1 0.69 0.21
 -3 23 -1 0.82 0.21
 -3 -23 -1 0.56 0.17
 -3 23 2 22.71 1.1
 -3 -23 2 25.44 1.18
 3 23 -2 24.52 1.07
 3 23 2 23.04 1.08
 -3 23 -2 22.43 1.05
 -3 -23 -2 23.68 1.01
 -3 23 -3 -0.04 0.15
 -3 -23 3 0.23 0.17
 3 23 -3 0 0.18
 3 23 3 -0.11 0.24
 -3 -23 -3 0.1 0.1
 -3 23 3 0.01 0.17
 -3 23 -4 4.19 0.49
 3 23 -4 3.69 0.45
 -3 -23 4 2.86 0.45
 -3 23 4 4.12 0.48
 3 23 4 3.86 0.46
 -3 -23 -4 3.21 0.43
 -3 23 -5 1.16 0.26
 3 23 -5 1.35 0.29
 -3 -23 5 2.36 0.43
 -3 23 5 1.41 0.33
 3 23 5 1.58 0.3
 -3 23 6 1.86 0.33
 3 23 6 2.21 0.34
 3 23 7 2.55 0.38
 -3 23 7 3.57 0.43
 -3 23 7 2.34 0.35
 -3 -23 8 3.53 0.56
 3 23 8 3.86 0.47
 -3 23 8 3.18 0.41
 -3 -23 9 6.02 0.8
 3 23 9 4.26 0.5
 3 23 9 4.03 0.51
 -3 23 9 4.86 0.54
 3 23 10 0.5 0.21
 -3 23 10 0.85 0.27
 3 23 10 0.38 0.2
 3 23 11 0.83 0.25
 -3 23 11 0.65 0.25
 3 23 11 0.57 0.23
 3 23 12 1.31 0.29
 3 23 12 1.91 0.39
 -3 23 12 1.67 0.34
 3 23 13 2.72 0.4
 3 23 13 3.54 0.51
 -3 23 13 3.3 0.44
 3 23 14 -0.16 0.21
 3 23 14 -0.14 0.21
 -3 23 14 -0.25 0.28
 3 23 15 1.76 0.35
 -3 23 15 1.28 0.27
 -3 23 16 0.29 0.17
 3 23 16 0.38 0.2
 -3 23 17 -0.26 0.23
 3 23 17 0.05 0.12
 3 25 0 31.44 1.29
 -3 25 0 29.92 1.27
 3 25 -1 9.11 0.7
 3 25 1 8.97 0.7
 -3 25 -1 9.31 0.72
 -3 25 1 7.83 0.67
 -3 25 2 27.97 1.25
 -3 -25 -2 27.75 1.21
 3 25 -2 28.8 1.21
 3 25 2 26.4 1.2
 -3 25 -2 25.51 1.18
 3 25 -3 5.88 0.6
 -3 25 -3 5.78 0.6
 3 25 3 5.83 0.59
 -3 25 3 5.19 0.6
 -3 -25 -3 3.76 0.45
 -3 -25 -4 22.19 1.1
 -3 25 -4 19.1 1.06
 3 25 4 21.82 1.12
 -3 25 4 21.74 1.18
 3 25 -4 20.73 1.1
 -3 -25 -5 1.03 0.27
 -3 25 -5 0.57 0.19
 -3 25 5 0.75 0.26
 3 25 5 0.3 0.23
 3 25 -5 0.76 0.26
 -3 25 6 13.48 0.92
 3 25 6 12.76 0.86
 -3 25 7 12.33 0.79
 -3 25 7 11.09 0.81
 3 25 7 11.82 0.86
 3 25 8 11.7 0.87
 -3 25 8 10.69 0.76
 3 25 9 18.51 1.06
 -3 25 9 18.47 1.05
 3 25 10 6.15 0.66
 -3 25 10 6.66 0.66
 3 25 11 12.75 0.92
 -3 25 11 14.17 0.94
 3 25 12 1.8 0.36
 3 25 12 2.19 0.42
 -3 25 12 1.63 0.35
 -3 25 13 8.78 0.71
 3 25 13 7.53 0.69
 3 25 13 8.84 0.76
 3 25 14 1.58 0.34
 -3 25 14 0.84 0.26
 3 25 14 0.9 0.26
 -3 25 15 3.29 0.44
 3 25 15 3.61 0.47
 -3 25 16 -0.02 0.16
 3 25 16 0.27 0.18
 -3 25 17 0.65 0.18
 3 27 0 67.95 1.95
 -3 27 0 65.3 1.99
 3 27 1 11.87 0.84
 -3 27 1 11.05 0.81
 3 27 -1 11.39 0.81
 -3 27 -1 11.97 0.86
 3 27 -2 39.48 1.5
 -3 27 2 39.11 1.56
 -3 27 -2 37.37 1.51
 3 27 2 36.33 1.45
 3 27 -3 16.94 1.01
 -3 27 -3 16.35 1.04
 -3 27 3 17.34 1.06
 3 27 3 17.16 1.04
 -3 27 -4 16.71 1.05
 -3 27 4 18.62 1.09
 3 27 4 16.69 1.03
 3 27 -4 18.44 1.07
 3 27 -5 3.73 0.5
 3 27 5 3.88 0.51
 -3 27 5 3.81 0.55
 -3 27 -5 3.88 0.54
 3 27 6 2.01 0.36
 -3 27 6 2.04 0.4
 3 27 7 15.52 1.01
 -3 27 7 14.77 0.89
 -3 27 7 14.13 0.96
 3 27 8 7.17 0.69
 -3 27 8 5.59 0.57
 -3 27 9 4.87 0.55
 3 27 9 5.49 0.63
 -3 27 10 7.33 0.69
 3 27 10 7.49 0.74
 -3 27 11 21.19 1.14
 3 27 11 19.26 1.14
 3 27 12 2.53 0.43
 -3 27 12 2.29 0.34
 3 27 13 5.19 0.58
 -3 27 13 5.75 0.59
 3 27 14 1.9 0.35
 -3 27 14 1.83 0.35
 -3 27 15 4.67 0.53
 -3 27 16 0.28 0.2
 3 29 0 6.16 0.64
 -3 29 0 6.13 0.62
 3 29 -1 12.2 0.89
 3 29 1 12.61 0.92
 -3 29 -1 12.47 0.93
 -3 29 1 11.9 0.91
 3 29 -2 10.14 0.8
 -3 29 -2 11.76 0.89
 -3 29 2 11.18 0.87
 3 29 2 10.35 0.85
 3 29 -3 7.11 0.68
 3 29 3 7.18 0.7
 -3 29 -3 7.59 0.75
 -3 29 3 6.46 0.69
 3 29 4 3.6 0.53
 -3 29 4 3.46 0.53
 -3 29 -4 3.5 0.54
 3 29 -4 3.7 0.54
 3 29 5 0.55 0.27
 3 29 -5 0.6 0.24
 -3 29 5 0.6 0.28
 -3 29 -5 0.83 0.34
 3 29 -6 6.27 0.67
 3 29 6 6.77 0.7
 -3 29 6 5.84 0.68
 3 29 7 0.26 0.19
 -3 29 7 0.04 0.21
 -3 29 7 -0.36 0.35
 3 29 8 0.7 0.28
 -3 29 8 0.05 0.3
 3 29 9 4.42 0.58
 -3 29 9 4.7 0.58
 -3 29 10 1.08 0.33
 3 29 10 1.54 0.39
 -3 29 11 6.81 0.66
 3 29 11 7.18 0.72
 3 29 12 3.58 0.51
 -3 29 12 3.67 0.48
 -3 29 13 2.35 0.37
 3 29 13 2.48 0.41
 3 29 14 0.24 0.16
 -3 29 14 0.56 0.24
 -3 29 15 2.12 0.36
 -3 29 16 0.2 0.14
 -3 31 0 0.06 0.24
 3 31 0 -0.1 0.25
 -3 31 1 -0.15 0.34
 3 31 -1 -0.12 0.29
 -3 31 -1 0.31 0.27
 3 31 1 -0.33 0.29
 3 31 2 0.33 0.23
 -3 31 2 0.35 0.23
 3 31 -2 0.01 0.27
 -3 31 -2 0.3 0.26
 3 31 3 2.13 0.43
 3 31 -3 2.44 0.46
 -3 31 -3 1.93 0.41
 -3 31 3 2.1 0.47
 -3 31 -4 0.85 0.34
 -3 31 4 0.49 0.23
 3 31 4 0.74 0.28
 3 31 -4 0.58 0.29
 3 31 -5 2.34 0.45
 -3 31 5 1.89 0.41
 3 31 5 2.5 0.51
 3 31 -6 3.01 0.5
 3 31 6 2.72 0.5
 -3 31 6 2.49 0.47
 -3 31 7 6.82 0.65
 3 31 7 8.26 0.8
 -3 31 7 7.48 0.75
 -3 31 8 0.72 0.19
 -3 31 8 0.75 0.26
 3 31 8 0.84 0.29
 -3 31 9 0.38 0.24
 3 31 9 0.35 0.21
 3 31 9 0.78 0.3
 -3 31 10 0.28 0.22
 3 31 10 0.59 0.28
 3 31 11 0.99 0.31
 -3 31 11 0.7 0.24
 3 31 12 0.29 0.22
 -3 31 12 -0.08 0.26
 3 31 13 0.11 0.16
 -3 31 13 -0.23 0.23
 -3 31 14 0.17 0.18
 3 31 14 -0.13 0.16
 -3 31 15 0.71 0.23
 -3 33 0 7.16 0.78
 3 33 0 7.26 0.79
 3 33 1 8.56 0.82
 3 33 -1 8.6 0.84
 -3 33 1 8.67 0.85
 -3 33 -1 9.07 0.85
 -3 33 2 16.05 1.16
 3 33 -2 14.54 1.1
 3 33 2 14.85 1.08
 -3 33 -2 14.27 1.07
 -3 33 -3 4.6 0.65
 3 33 3 4.99 0.63
 3 33 -3 5.16 0.68
 -3 33 3 5.02 0.67
 3 33 -4 0.64 0.24
 3 33 4 0.88 0.33
 -3 33 -4 0.74 0.33
 -3 33 4 0.77 0.31
 -3 33 5 10.63 0.94
 3 33 -5 12.53 1
 3 33 5 11.56 0.95
 3 33 6 11.62 0.97
 3 33 -6 11.58 0.96
 -3 33 6 10.34 0.94
 -3 33 7 8.53 0.76
 -3 33 7 8.51 0.8
 3 33 7 9.71 0.86
 -3 33 8 7.04 0.7
 -3 33 8 7.75 0.75
 3 33 8 7.98 0.78
 3 33 9 6.11 0.66
 3 33 9 5.71 0.66
 -3 33 9 6.87 0.71
 -3 33 10 1.57 0.37
 3 33 10 1.59 0.37
 3 33 11 1.27 0.32
 -3 33 11 0.65 0.19
 3 33 12 1.49 0.34
 -3 33 12 1.41 0.29
 3 33 13 0.73 0.2
 -3 33 13 1.05 0.26
 3 33 14 0.94 0.23
 -3 33 14 1.82 0.33
 -3 33 15 1.67 0.31
 -3 35 0 5.84 0.74
 3 35 0 6.58 0.8
 3 35 1 49.23 1.97
 -3 35 1 49.54 2.06
 3 35 -1 49.96 2.03
 -3 35 -1 52.45 2.09
 -3 35 2 6.82 0.79
 3 35 2 7.35 0.78
 3 35 -2 6.94 0.77
 -3 35 -2 5.88 0.73
 3 35 3 0.96 0.37
 -3 35 -3 0.04 0.41
 -3 35 3 0.65 0.32
 3 35 -3 0.81 0.37
 3 35 -4 4.27 0.62
 3 35 4 3.99 0.58
 -3 35 4 4.22 0.65
 3 35 -5 29.56 1.56
 3 35 5 27.25 1.46
 -3 35 5 26.63 1.53
 3 35 -6 5.17 0.68
 -3 35 6 6.07 0.69
 -3 35 6 6.04 0.74
 3 35 6 5.43 0.68
 -3 35 7 8.98 0.82
 -3 35 7 9.63 0.88
 3 35 7 10.63 0.93
 3 35 8 9.49 0.88
 -3 35 8 7.42 0.73
 -3 35 8 8.57 0.79
 3 35 9 5 0.63
 3 35 9 4.91 0.62
 -3 35 9 5.3 0.64
 -3 35 10 4.55 0.56
 3 35 10 4.63 0.59
 3 35 11 2.84 0.46
 -3 35 11 2.64 0.43
 3 35 12 3.56 0.46
 -3 35 12 4.07 0.5
 -3 35 13 1.94 0.35
 3 35 13 1.41 0.27
 -3 35 14 3.45 0.42
 -3 37 0 11.61 1.05
 3 37 0 13.19 1.1
 3 37 1 8.78 0.89
 -3 37 -1 7.35 0.79
 -3 37 1 8.08 0.86
 3 37 -1 7.88 0.81
 3 37 -2 1.44 0.39
 3 37 2 1.26 0.37
 -3 37 2 1.21 0.43
 3 37 3 15.73 1.12
 3 37 -3 17.48 1.23
 -3 37 3 18.8 1.3
 3 37 -4 3.67 0.6
 3 37 4 3.67 0.57
 -3 37 4 4.52 0.69
 -3 37 5 2.86 0.53
 3 37 -5 3.11 0.51
 3 37 5 2.75 0.46
 -3 37 6 2.2 0.49
 3 37 -6 1.17 0.33
 -3 37 6 1.33 0.37
 3 37 6 1.16 0.3
 -3 37 7 4.79 0.62
 3 37 7 5.07 0.66
 -3 37 7 4.33 0.58
 -3 37 8 1.42 0.33
 -3 37 8 2.23 0.43
 3 37 9 2.94 0.47
 -3 37 9 3.42 0.52
 3 37 9 3.33 0.51
 3 37 10 1.85 0.37
 -3 37 10 2.13 0.41
 3 37 11 1.21 0.29
 -3 37 11 0.9 0.26
 -3 37 12 3.01 0.42
 3 37 12 2.19 0.33
 -3 37 13 0.22 0.12
 3 39 0 0.19 0.29
 -3 39 0 -0.2 0.33
 -3 39 -1 0.18 0.36
 3 39 1 0.26 0.28
 -3 39 1 1.1 0.46
 3 39 -1 0.68 0.36
 3 39 -2 -0.2 0.32
 -3 39 2 -0.15 0.32
 -3 39 3 2.96 0.56
 3 39 3 2.75 0.49
 3 39 -3 2.89 0.51
 3 39 -4 0.23 0.24
 -3 39 4 0.29 0.24
 3 39 4 0.38 0.28
 -3 39 5 0.41 0.3
 -3 39 5 0.72 0.34
 3 39 -5 0.13 0.21
 3 39 5 0.23 0.22
 3 39 -6 -0.01 0.22
 -3 39 6 0.49 0.27
 3 39 6 -0.36 0.31
 -3 39 6 0.51 0.25
 -3 39 7 0.24 0.21
 -3 39 7 0.73 0.29
 3 39 7 0.71 0.25
 3 39 8 -0.35 0.32
 -3 39 8 0.06 0.19
 3 39 8 0.31 0.25
 -3 39 9 -0.08 0.19
 3 39 9 -0.35 0.26
 3 39 9 0.15 0.21
 3 39 10 0.02 0.19
 -3 39 10 -0.15 0.2
 3 39 11 -0.29 0.19
 -3 39 11 -0.15 0.19
 3 39 12 -0.45 0.22
 -3 39 12 0.21 0.16
 3 41 0 1.67 0.52
 -3 41 0 1.4 0.6
 -3 41 1 9.25 0.97
 3 41 1 8.22 0.82
 3 41 -1 9.17 0.87
 3 41 2 -0.03 0.27
 3 41 -2 -0.18 0.33
 -3 41 2 -0.21 0.35
 3 41 3 2.97 0.52
 -3 41 3 3.31 0.57
 3 41 -3 3.47 0.55
 3 41 -4 0.02 0.2
 -3 41 4 0.55 0.29
 -3 41 4 0.45 0.26
 3 41 4 0.67 0.32
 -3 41 5 1.61 0.39
 3 41 -5 1.11 0.35
 -3 41 5 1.26 0.37
 3 41 5 0.8 0.27
 -3 41 6 1.14 0.33
 3 41 6 0.32 0.23
 -3 41 7 2.59 0.44
 3 41 7 2.28 0.4
 -3 41 8 2.66 0.43
 3 41 8 1.81 0.39
 3 41 8 2.36 0.42
 3 41 9 0.67 0.25
 3 41 9 0.39 0.21
 -3 41 9 0.7 0.24
 3 41 10 1.99 0.35
 -3 41 10 1.84 0.33
 -3 41 11 0.63 0.21
 3 41 11 0.31 0.12
 3 43 0 1.66 0.43
 3 43 1 19.36 1.19
 3 43 -1 17.89 1.19
 3 43 -2 1.52 0.39
 3 43 2 2.14 0.45
 -3 43 3 6.07 0.64
 3 43 -3 5.18 0.63
 3 43 3 6.02 0.68
 3 43 4 1.86 0.41
 -3 43 4 2.39 0.46
 3 43 -4 1.47 0.41
 3 43 5 2.22 0.38
 -3 43 5 3.17 0.49
 3 43 6 2.16 0.39
 -3 43 6 2.3 0.43
 3 43 7 4.6 0.57
 3 43 7 4.48 0.53
 -3 43 7 4.68 0.53
 3 43 8 4.77 0.53
 -3 43 8 5.91 0.59
 3 43 9 2.21 0.37
 -3 43 9 1.76 0.33
 -3 43 10 4.27 0.47
 3 45 0 1.66 0.37
 3 45 -1 6.86 0.68
 3 45 1 7.43 0.73
 3 45 -2 1.17 0.28
 -3 45 2 1 0.29
 3 45 2 1.56 0.34
 -3 45 3 4.57 0.55
 3 45 3 4.65 0.56
 3 45 -3 4.26 0.55
 3 45 4 0.97 0.27
 -3 45 4 1.1 0.3
 3 45 5 3.08 0.45
 -3 45 5 3.36 0.48
 -3 45 6 2.05 0.35
 3 45 6 2.26 0.39
 3 45 6 2.35 0.4
 -3 45 7 2.47 0.38
 3 45 7 2.75 0.4
 3 45 7 2.25 0.36
 -3 45 8 3.62 0.42
 3 45 8 4.37 0.49
 3 47 0 0.19 0.18
 -3 47 1 0.51 0.22
 3 47 -1 0.18 0.18
 3 47 1 0.38 0.21
 3 47 2 0.41 0.21
 3 47 -2 0.01 0.21
 -3 47 2 -0.06 0.13
 3 47 3 0.16 0.16
 -3 47 3 0.24 0.17
 3 47 4 0.14 0.2
 -3 47 4 0.12 0.14
 -3 47 5 0.16 0.14
 3 47 5 -0.11 0.19
 3 47 5 0.16 0.15
 3 47 6 0.9 0.24
 3 49 0 0.94 0.25
 3 49 1 0.54 0.21
 3 49 2 -0.12 0.13
 -4 0 0 32 0.58
 -4 0 1 0.29 0.06
 -4 0 2 677.47 3.02
 -4 0 3 3.99 0.28
 -4 0 4 85.45 1.31
 -4 0 5 12.99 0.55
 -4 0 6 4.94 0.39
 -4 0 7 35.35 1.06
 -4 0 8 5.76 0.46
 4 0 9 3.73 0.39
 -4 0 9 4.25 0.45
 -4 0 9 4.36 0.45
 -4 0 9 5.11 0.51
 -4 0 10 0.79 0.28
 4 0 10 0.42 0.13
 -4 0 10 0.57 0.2
 -4 0 11 4.34 0.54
 4 0 11 3.53 0.45
 -4 0 11 3.64 0.47
 4 0 12 1.71 0.34
 -4 0 12 2.37 0.42
 4 0 13 11.12 0.81
 -4 0 13 11.59 0.89
 4 0 14 0.75 0.24
 -4 0 14 1.15 0.36
 -4 0 15 28.84 1.42
 4 0 15 26.39 1.27
 -4 0 16 2.41 0.49
 4 0 16 2.08 0.42
 -4 0 17 13.71 0.98
 4 0 17 11.76 0.84
 4 0 18 0.28 0.16
 4 0 19 2.02 0.34
 4 0 20 0.02 0.1
 -4 -2 0 151.76 1.35
 -4 2 0 147.61 1.18
 -4 2 1 0.17 0.06
 -4 -2 1 0.26 0.08
 -4 2 2 1.34 0.14
 -4 -2 2 1.3 0.16
 -4 2 3 60.14 0.98
 -4 -2 3 60.16 1.03
 -4 2 4 226.66 2.09
 -4 -2 4 235.48 2.2
 -4 2 5 42.84 1.02
 -4 -2 5 39.44 0.97
 -4 2 6 37.04 1.02
 -4 -2 6 35.59 1.01
 -4 -2 7 0.28 0.13
 -4 2 7 0.23 0.12
 -4 -2 8 0.17 0.13
 -4 2 8 0.16 0.11
 -4 -2 9 1.13 0.3
 -4 -2 9 0.68 0.17
 4 -2 9 0.65 0.18
 -4 2 9 0.72 0.23
 -4 -2 9 1.44 0.26
 -4 2 9 0.88 0.23
 4 -2 10 0.01 0.14
 -4 2 10 0.06 0.17
 -4 -2 10 -0.07 0.17
 4 2 10 -0.21 0.22
 -4 -2 10 -0.12 0.19
 -4 2 10 0.15 0.17
 4 -2 11 1.58 0.33
 4 2 11 1.43 0.27
 -4 2 11 2.14 0.38
 -4 -2 11 1.06 0.27
 -4 2 11 1.76 0.35
 -4 2 12 -0.05 0.2
 -4 -2 12 0 0.17
 4 2 12 -0.09 0.18
 4 -2 12 -0.05 0.15
 -4 2 12 0.07 0.2
 4 2 13 8.75 0.72
 4 -2 13 8.3 0.72
 -4 -2 13 9.89 0.85
 -4 2 13 9.06 0.78
 4 -2 14 0.67 0.26
 4 2 14 0.55 0.23
 -4 2 14 0.71 0.33
 -4 -2 14 0.79 0.33
 -4 -2 15 15.35 1.08
 -4 2 15 15.41 1.05
 4 -2 15 13.37 0.93
 4 2 15 14 0.93
 4 -2 16 0.51 0.24
 -4 2 16 1.4 0.4
 4 2 16 0.68 0.28
 -4 -2 16 1.5 0.39
 -4 2 17 5.09 0.62
 4 -2 17 5.25 0.58
 4 2 17 4.76 0.55
 4 2 18 0.59 0.22
 4 -2 18 0.36 0.19
 4 2 19 0.04 0.13
 4 -2 19 0.13 0.14
 4 -2 20 0 0.11
 4 2 20 0.11 0.13
 -4 -4 0 68.34 0.96
 -4 4 0 66.76 0.72
 -4 -4 1 1.11 0.14
 -4 4 1 1.18 0.11
 -4 -4 2 76.83 1.11
 -4 4 2 76.08 0.98
 -4 4 3 10.14 0.4
 -4 -4 3 10.14 0.44
 -4 4 4 64.14 1.15
 -4 -4 4 64 1.19
 -4 4 5 8.37 0.47
 -4 -4 5 8.03 0.46
 -4 -4 6 2.02 0.29
 -4 4 6 2.14 0.26
 -4 -4 7 7.4 0.5
 -4 4 7 8.32 0.53
 -4 -4 8 8.79 0.58
 -4 4 8 7.93 0.54
 -4 4 8 8.8 0.59
 -4 -4 9 14.62 0.81
 4 -4 9 11.16 0.73
 -4 4 9 13.59 0.79
 -4 -4 9 11.17 0.75
 -4 4 9 13.23 0.79
 -4 -4 10 3.83 0.47
 -4 -4 10 2.31 0.33
 4 -4 10 3.69 0.44
 4 4 10 2.58 0.37
 -4 4 10 2.8 0.41
 -4 4 10 3.01 0.43
 -4 4 11 2.25 0.39
 4 4 11 2.02 0.33
 4 -4 11 2.12 0.38
 -4 4 11 2.58 0.42
 -4 -4 11 2.25 0.38
 4 4 12 0.53 0.22
 -4 4 12 0.78 0.31
 4 -4 12 0.63 0.23
 -4 -4 12 0.89 0.3
 -4 4 12 0.61 0.26
 4 -4 13 0.29 0.2
 -4 4 13 0.07 0.34
 4 4 13 0.16 0.15
 -4 -4 13 0.3 0.24
 -4 4 13 0.28 0.22
 4 -4 14 0 0.24
 4 4 14 0.59 0.25
 -4 -4 14 0.65 0.31
 -4 4 14 0.54 0.24
 -4 -4 15 6.34 0.7
 4 4 15 5.47 0.6
 -4 4 15 5.72 0.66
 4 -4 15 4.81 0.55
 4 4 16 0.66 0.25
 -4 -4 16 0.87 0.38
 -4 4 16 0.51 0.24
 4 -4 16 0.83 0.22
 -4 4 17 8.04 0.75
 4 -4 17 6.62 0.64
 4 4 17 7.01 0.65
 4 4 18 0 0.15
 4 -4 18 0.07 0.15
 4 -4 19 1.03 0.26
 4 4 19 0.85 0.21
 4 4 20 1.4 0.26
 -4 6 0 155.11 0.97
 -4 -6 0 148.45 1.49
 -4 -6 1 11.81 0.44
 -4 6 1 13.36 0.34
 -4 -6 2 37.47 0.81
 -4 6 2 37.84 0.68
 -4 6 3 17.6 0.54
 -4 -6 3 17.19 0.61
 -4 -6 4 58.34 1.18
 -4 6 4 58.91 1.09
 -4 6 5 0.29 0.12
 -4 -6 5 0.27 0.13
 -4 -6 6 3.42 0.34
 -4 6 6 3.72 0.34
 -4 -6 7 5.13 0.43
 -4 6 8 5.09 0.44
 -4 -6 8 5.21 0.47
 -4 6 8 4.39 0.44
 -4 6 9 54.06 1.55
 -4 -6 9 50.37 1.59
 -4 6 9 56.23 1.59
 -4 -6 9 52.61 1.53
 4 -6 10 34.09 1.34
 4 6 10 25.6 1.11
 -4 6 10 29.04 1.23
 -4 -6 10 32.98 1.37
 -4 6 10 27.61 1.18
 -4 -6 10 25.64 1.14
 4 -6 11 34.41 1.38
 -4 6 11 39.02 1.51
 4 6 11 36.19 1.38
 -4 -6 11 35.66 1.46
 -4 6 11 36.88 1.43
 4 -6 12 5.76 0.59
 4 6 12 4.84 0.53
 -4 6 12 5.46 0.65
 -4 -6 12 6.05 0.65
 -4 6 12 5.31 0.62
 4 6 13 4.24 0.5
 -4 6 13 4.89 0.6
 -4 -6 13 4.51 0.58
 4 -6 13 4.37 0.53
 -4 6 13 5.78 0.7
 -4 6 14 0.08 0.24
 4 -6 14 -0.13 0.28
 4 6 14 0.26 0.22
 -4 -6 14 0.35 0.27
 4 -6 15 0.4 0.22
 4 6 15 0.42 0.19
 -4 -6 15 0.78 0.32
 -4 6 15 0.23 0.24
 4 -6 16 1.99 0.38
 -4 6 16 2.65 0.47
 4 6 16 2.32 0.39
 4 6 17 0.13 0.17
 -4 6 17 0.33 0.23
 4 -6 17 -0.02 0.16
 4 6 18 1.12 0.27
 4 -6 18 1.62 0.32
 4 -6 19 4.72 0.5
 4 6 19 4.65 0.48
 4 6 20 2.59 0.35
 -4 -8 0 166.75 1.63
 -4 8 0 152.39 0.82
 -4 -8 1 43.39 0.87
 -4 8 1 43.15 0.55
 -4 -8 2 21.98 0.66
 -4 8 2 21.55 0.49
 -4 -8 3 29.01 0.81
 -4 8 3 26.92 0.64
 -4 -8 4 39.45 1.01
 -4 8 4 36.61 0.85
 -4 8 5 9.67 0.5
 -4 -8 5 9.47 0.54
 -4 -8 6 1.12 0.21
 -4 -8 7 3.15 0.35
 -4 -8 8 4.3 0.44
 -4 8 8 4.34 0.44
 -4 8 8 3.57 0.4
 -4 8 9 25.18 1.06
 -4 -8 9 25.21 1.14
 -4 -8 9 23.56 1.06
 -4 -8 10 48.83 1.61
 -4 8 10 51.8 1.63
 4 8 10 47.9 1.55
 -4 8 10 48.8 1.58
 4 -8 11 65.17 1.9
 -4 -8 11 66.27 2
 4 8 11 73.59 1.98
 -4 8 11 71.95 2.02
 -4 -8 11 66.38 2
 -4 8 11 73.85 2.02
 4 8 12 21.54 1.15
 -4 8 12 24.1 1.27
 -4 -8 12 27.44 1.35
 -4 8 12 21.84 1.18
 4 -8 12 25.5 1.23
 4 8 13 6.75 0.66
 -4 8 13 7.47 0.73
 -4 8 13 7.15 0.8
 -4 -8 13 6.43 0.7
 4 -8 13 6.65 0.64
 4 8 14 0.23 0.21
 4 -8 14 -0.34 0.27
 -4 8 14 0.59 0.35
 -4 8 14 -0.04 0.24
 -4 -8 14 -0.17 0.2
 4 -8 15 0.97 0.28
 4 8 15 1.11 0.24
 -4 8 15 1.58 0.35
 4 8 16 -0.23 0.25
 4 -8 16 -0.2 0.2
 -4 8 16 -0.02 0.18
 4 8 17 0.72 0.24
 4 -8 17 0.77 0.24
 -4 8 17 0.63 0.25
 4 -8 18 4.47 0.52
 4 8 18 5.06 0.54
 4 8 19 4.18 0.46
 4 8 20 3.44 0.39
 -4 -10 0 80.52 1.2
 -4 -10 1 60.46 1.08
 -4 -10 2 33.26 0.85
 -4 -10 3 28.89 0.85
 -4 -10 4 16.62 0.69
 -4 -10 5 0.7 0.17
 -4 -10 6 0.98 0.21
 -4 10 7 4.39 0.41
 -4 -10 7 3.66 0.38
 -4 -10 8 5 0.5
 -4 10 8 5.95 0.51
 -4 -10 8 6.37 0.61
 -4 10 8 4.44 0.44
 -4 10 9 37.43 1.3
 -4 -10 9 35.45 1.33
 -4 -10 9 36.58 1.47
 4 10 10 37.02 1.39
 4 -10 10 37.84 1.38
 -4 10 10 38.18 1.41
 -4 -10 10 38.07 1.47
 -4 10 10 37.6 1.39
 -4 -10 11 63.66 2
 -4 10 11 68.19 1.99
 4 10 11 74.27 2.05
 -4 -10 11 67.06 2.06
 -4 10 11 73.32 2.05
 4 -10 11 60.17 1.81
 4 10 12 17.24 1.03
 -4 10 12 16.15 1.03
 -4 -10 12 18.47 1.14
 -4 10 12 17.36 1.04
 4 -10 12 18.33 1.03
 4 10 13 6.53 0.64
 -4 10 13 6.55 0.68
 4 -10 13 4.8 0.57
 -4 10 13 6.44 0.71
 -4 -10 13 5.24 0.62
 4 10 14 3.91 0.51
 -4 10 14 4.86 0.66
 4 -10 14 3.72 0.49
 -4 10 14 4.26 0.56
 4 -10 15 0.08 0.17
 -4 10 15 0.03 0.21
 4 10 16 0.48 0.16
 -4 10 16 0.87 0.29
 4 -10 16 0.94 0.31
 4 10 17 0.85 0.29
 -4 10 17 0.84 0.29
 4 -10 17 0.82 0.26
 4 10 18 2.78 0.41
 4 10 19 2.69 0.38
 4 10 20 4.42 0.44
 -4 -12 0 26.72 0.73
 -4 -12 -1 49.79 1.05
 -4 -12 1 47.92 1.02
 -4 -12 2 1.03 0.17
 -4 -12 3 0.58 0.14
 -4 -12 4 0.35 0.11
 -4 -12 5 3.09 0.35
 -4 -12 6 71.91 1.65
 -4 12 7 6.57 0.51
 -4 -12 7 5.7 0.51
 -4 12 8 5.74 0.5
 -4 -12 8 5.33 0.51
 -4 12 8 4.67 0.46
 4 12 9 27.24 1.17
 -4 12 9 24.32 1.07
 -4 12 9 25.87 1.11
 -4 12 10 36.06 1.34
 -4 -12 10 36.74 1.49
 -4 12 10 33.04 1.33
 4 12 10 35.05 1.38
 -4 -12 11 9.25 0.8
 4 12 11 10.63 0.8
 -4 12 11 8.63 0.72
 -4 12 11 10.36 0.79
 4 12 12 3.86 0.53
 -4 12 12 3.01 0.45
 -4 12 12 3.82 0.52
 4 12 13 0.04 0.24
 -4 12 13 0.1 0.2
 -4 12 13 0.24 0.23
 4 12 14 0.53 0.18
 -4 12 14 0.79 0.35
 -4 12 14 0.6 0.29
 -4 12 15 2.2 0.44
 4 12 15 1.31 0.26
 -4 12 15 1.43 0.35
 4 12 16 0.11 0.16
 -4 12 16 0.23 0.21
 -4 12 17 0.11 0.17
 4 12 17 0.12 0.17
 4 12 18 0.83 0.23
 4 12 19 0.78 0.21
 -4 -14 0 20.91 0.69
 -4 -14 1 4.6 0.34
 -4 -14 -1 5.06 0.35
 -4 -14 2 0.96 0.17
 -4 -14 3 13.47 0.65
 -4 -14 4 15.26 0.73
 -4 -14 5 139.41 2.31
 -4 -14 6 49.14 1.42
 -4 14 6 51.11 1.34
 -4 14 7 24.17 0.98
 -4 -14 7 21.05 1.01
 4 14 8 0.57 0.21
 -4 14 8 1.01 0.24
 -4 -14 8 0.87 0.22
 -4 14 8 0.63 0.22
 4 14 9 5.46 0.51
 -4 14 9 6.12 0.56
 -4 -14 9 6.3 0.61
 -4 14 9 7.25 0.6
 4 14 9 7.71 0.65
 4 14 10 6.22 0.62
 -4 14 10 5.52 0.57
 4 14 10 5.11 0.54
 -4 14 10 5.59 0.56
 -4 -14 10 5.53 0.61
 -4 -14 11 3.96 0.54
 4 14 11 5.22 0.58
 -4 14 11 3.55 0.44
 -4 14 11 4.67 0.54
 4 14 12 4.19 0.55
 -4 14 12 3.68 0.51
 -4 14 12 3.07 0.46
 -4 14 13 0.03 0.21
 4 14 13 0.2 0.19
 -4 14 13 0.28 0.22
 4 14 14 7.49 0.7
 -4 14 14 6.16 0.7
 -4 14 14 7.6 0.76
 4 14 15 2.73 0.46
 -4 14 15 2.8 0.47
 -4 14 15 3.64 0.55
 -4 14 16 9.9 0.85
 -4 14 16 9.77 0.84
 4 14 16 11.15 0.87
 4 14 17 1.69 0.35
 -4 14 17 1.29 0.31
 4 14 18 0.43 0.18
 4 14 19 0.23 0.14
 -4 -16 0 1.24 0.19
 -4 -16 -1 0.08 0.08
 -4 -16 1 0 0.08
 -4 -16 2 0.06 0.08
 -4 -16 3 43.88 1.24
 -4 -16 4 135.12 2.29
 -4 -16 5 134.63 2.38
 -4 16 6 40.3 1.23
 -4 -16 6 42.82 1.4
 4 16 7 28.96 1.24
 -4 16 7 31.03 1.12
 -4 16 8 6.45 0.55
 -4 -16 8 6.69 0.63
 4 16 8 5.58 0.53
 -4 16 8 4.62 0.46
 -4 16 9 0.4 0.15
 4 16 9 0.2 0.16
 4 16 9 0.45 0.15
 -4 -16 9 0.7 0.25
 4 16 9 0.56 0.2
 -4 16 9 0.49 0.18
 -4 -16 10 0.71 0.26
 4 16 10 0.65 0.21
 4 16 10 0.72 0.23
 -4 16 10 0.86 0.29
 -4 16 10 0.67 0.23
 -4 16 11 0.71 0.23
 4 16 11 0.34 0.18
 4 16 11 0.61 0.25
 -4 -16 11 0.49 0.23
 -4 16 11 0.35 0.18
 4 16 12 2.78 0.45
 -4 16 12 2.75 0.44
 -4 16 12 1.94 0.36
 4 16 13 2.74 0.45
 -4 16 13 2.48 0.48
 -4 16 13 1.98 0.39
 -4 16 14 12.65 0.96
 -4 16 14 14.15 0.98
 4 16 14 13.8 0.97
 4 16 15 6.37 0.71
 -4 16 15 5.65 0.72
 -4 16 15 5.29 0.64
 -4 16 16 16.24 1.04
 -4 16 16 17.58 1.09
 4 16 16 18.84 1.12
 4 16 17 2.53 0.42
 4 16 18 2.19 0.36
 4 16 19 0.14 0.14
 -4 -18 0 0.84 0.19
 -4 -18 1 0.08 0.09
 -4 -18 -1 0.02 0.09
 -4 -18 -2 0.22 0.13
 -4 -18 2 0.08 0.1
 -4 -18 3 194.73 2.75
 4 18 4 26.18 1.12
 -4 18 -4 25.6 1.06
 -4 -18 5 132.51 2.5
 4 18 5 153.95 2.73
 -4 18 6 41.59 1.3
 4 18 6 39.47 1.42
 -4 -18 7 29.48 1.34
 -4 18 7 32 1.17
 4 18 8 16.55 0.96
 4 18 8 16.27 0.92
 -4 18 8 18.25 0.93
 -4 18 9 0.13 0.17
 4 18 9 -0.1 0.25
 4 18 9 0.07 0.15
 -4 18 9 0.12 0.14
 -4 -18 9 0.12 0.16
 4 18 10 0.05 0.14
 4 18 10 -0.16 0.21
 -4 -18 10 0.17 0.21
 -4 18 10 0.1 0.14
 -4 18 10 0.35 0.21
 4 18 11 0.11 0.17
 -4 -18 11 0.32 0.2
 4 18 11 0.28 0.2
 -4 18 11 0.34 0.24
 -4 18 11 0.28 0.17
 -4 18 12 11.83 0.83
 4 18 12 10.45 0.8
 -4 18 12 12.12 0.91
 4 18 13 0.69 0.26
 -4 18 13 0.49 0.21
 -4 18 13 0.97 0.3
 -4 18 14 25.37 1.3
 -4 18 14 26.42 1.34
 -4 18 15 2.97 0.53
 -4 18 15 2.19 0.44
 4 18 15 3.14 0.51
 -4 18 16 22.34 1.19
 -4 18 16 24.67 1.29
 4 18 17 2.5 0.42
 4 18 18 3.33 0.42
 -4 20 0 2.09 0.32
 4 20 0 2.22 0.35
 -4 20 1 13.91 0.78
 -4 20 -1 13.52 0.76
 4 20 -1 13 0.77
 -4 -20 -1 12.89 0.68
 4 20 1 13.53 0.76
 -4 -20 1 11.87 0.68
 -4 20 2 2.43 0.37
 -4 -20 -2 2.41 0.32
 4 20 2 2.35 0.37
 -4 20 -2 2.37 0.36
 -4 -20 2 2.06 0.33
 -4 20 3 56.95 1.64
 -4 -20 -3 52.48 1.52
 4 20 3 56.31 1.62
 -4 20 -3 54.48 1.58
 -4 -20 3 50.49 1.52
 -4 20 4 14.21 0.83
 4 20 4 14.21 0.85
 -4 -20 4 16.96 0.95
 -4 20 -4 14.76 0.87
 -4 20 5 54.76 1.64
 -4 -20 5 51.52 1.69
 -4 20 6 33.38 1.17
 4 20 6 33.68 1.33
 -4 -20 6 34.92 1.43
 -4 -20 7 23.23 1.25
 -4 20 7 25.52 1.06
 4 20 8 3.12 0.43
 4 20 8 4 0.46
 -4 -20 8 3.73 0.53
 -4 20 8 3.24 0.41
 -4 20 9 0.05 0.16
 4 20 9 0.07 0.2
 4 20 9 0.3 0.19
 -4 -20 9 0.24 0.18
 -4 20 10 1.59 0.34
 4 20 10 1.85 0.41
 -4 -20 10 1.6 0.4
 4 20 10 1.32 0.3
 -4 20 10 1.11 0.29
 -4 -20 11 0.71 0.3
 4 20 11 0.61 0.22
 4 20 11 0.87 0.26
 -4 20 11 0.76 0.24
 -4 20 11 0.76 0.28
 4 20 12 0.14 0.15
 4 20 12 0.11 0.17
 -4 20 12 -0.11 0.27
 -4 20 12 0.39 0.23
 4 20 13 0.56 0.24
 -4 20 13 0.23 0.24
 -4 20 13 0.83 0.26
 -4 20 14 4.65 0.54
 -4 20 14 5.31 0.62
 4 20 14 6.12 0.67
 4 20 15 1.27 0.34
 -4 20 15 1.02 0.34
 -4 20 15 1.07 0.34
 -4 20 16 15.38 0.98
 4 20 16 18.93 1.08
 4 20 17 0.49 0.22
 -4 20 17 0.33 0.2
 4 20 18 1.7 0.3
 4 22 0 1.93 0.38
 -4 -22 0 1.32 0.3
 -4 22 -1 62.59 1.69
 4 22 1 61.78 1.71
 4 22 -1 66.06 1.76
 -4 22 1 60.33 1.74
 -4 -22 1 57.59 1.61
 -4 -22 -1 57.98 1.57
 -4 22 -2 0.65 0.24
 -4 -22 2 0.73 0.18
 4 22 -2 0.48 0.2
 -4 -22 -2 0.8 0.21
 4 22 2 0.72 0.23
 -4 22 2 0.39 0.21
 -4 22 -3 33.07 1.29
 -4 22 3 36.24 1.39
 -4 -22 -3 32.19 1.22
 4 22 -3 31.74 1.22
 4 22 3 33 1.28
 -4 -22 3 32.81 1.33
 -4 22 4 7.53 0.69
 -4 -22 4 8.14 0.71
 -4 22 -4 7.67 0.67
 4 22 4 7.36 0.63
 4 22 -4 7.19 0.6
 4 22 -5 21.26 1.04
 -4 -22 5 21.03 1.17
 4 22 5 22.87 1.12
 -4 22 5 24.06 1.15
 -4 22 6 5.47 0.57
 4 22 6 6.44 0.61
 -4 -22 6 5.4 0.62
 -4 -22 7 1.09 0.32
 -4 22 7 1.02 0.23
 4 22 7 1.06 0.26
 4 22 8 2.94 0.43
 4 22 8 3.43 0.46
 -4 22 8 3.78 0.46
 -4 -22 8 4.6 0.64
 -4 22 9 0.83 0.25
 4 22 9 0.88 0.27
 4 22 9 0.98 0.28
 -4 -22 9 1.11 0.33
 4 22 10 7.33 0.7
 4 22 10 5.56 0.59
 -4 -22 10 6.6 0.81
 -4 22 10 5.78 0.58
 4 22 11 1.51 0.34
 4 22 11 2.48 0.44
 -4 22 11 2.24 0.4
 4 22 12 1.07 0.28
 4 22 12 1.06 0.27
 -4 22 12 0.73 0.21
 -4 22 13 0.79 0.25
 4 22 13 0.99 0.3
 -4 22 13 0.07 0.27
 4 22 13 0.2 0.17
 4 22 14 7.19 0.7
 -4 22 14 5.52 0.59
 -4 22 14 6 0.64
 4 22 15 0.17 0.18
 -4 22 15 -0.06 0.22
 -4 22 16 2.58 0.44
 4 22 16 3.28 0.47
 -4 22 17 -0.02 0.16
 4 22 17 -0.02 0.14
 -4 24 0 8.26 0.72
 4 24 0 8.34 0.75
 -4 24 -1 147.03 2.76
 4 24 -1 154.47 2.8
 -4 -24 -1 154.34 2.75
 4 24 1 153.56 2.84
 -4 24 1 157.06 2.92
 -4 -24 1 155.99 2.98
 -4 24 -2 6.27 0.61
 -4 24 2 5.34 0.59
 -4 -24 -2 5.85 0.56
 4 24 -2 6.03 0.58
 4 24 2 6.12 0.6
 -4 -24 2 6.25 0.63
 4 24 3 0.88 0.23
 4 24 -3 1.03 0.25
 -4 -24 3 1.76 0.36
 -4 -24 -3 1.24 0.25
 -4 24 3 1.06 0.26
 -4 24 -3 1.39 0.33
 -4 24 4 1.3 0.32
 -4 -24 -4 0.89 0.25
 4 24 -4 1.18 0.27
 -4 -24 4 1 0.27
 -4 24 -4 1.19 0.33
 4 24 4 1.19 0.23
 -4 24 5 8.36 0.69
 4 24 -5 6.78 0.63
 4 24 5 7.21 0.64
 -4 -24 5 6.45 0.71
 -4 24 6 0.03 0.17
 4 24 6 -0.2 0.24
 -4 -24 6 0.38 0.25
 -4 24 7 4.87 0.5
 -4 24 7 3.93 0.5
 4 24 7 5.02 0.55
 -4 -24 7 4.95 0.7
 4 24 8 5.85 0.61
 -4 -24 8 6.47 0.81
 -4 24 8 6.56 0.61
 4 24 9 18.95 1.09
 -4 24 9 17.41 1
 4 24 10 25.98 1.28
 4 24 10 24.79 1.26
 -4 24 10 24.87 1.22
 4 24 11 1.77 0.37
 4 24 11 1.8 0.39
 -4 24 11 1.86 0.37
 -4 24 12 26.08 1.24
 4 24 12 27.39 1.35
 4 24 13 0.23 0.19
 -4 24 13 -0.51 0.32
 4 24 13 -0.2 0.25
 4 24 14 1.39 0.33
 -4 24 14 1.25 0.26
 4 24 15 -0.2 0.19
 -4 24 15 -0.28 0.21
 -4 24 16 -0.21 0.19
 4 24 16 0.24 0.16
 -4 24 17 -0.13 0.18
 4 24 17 -0.15 0.14
 -4 26 0 44.28 1.67
 4 26 0 45.85 1.6
 -4 26 -1 97.25 2.37
 4 26 -1 100.27 2.33
 -4 26 1 101.67 2.45
 4 26 1 98.31 2.34
 -4 26 2 11.27 0.88
 4 26 -2 11.17 0.79
 4 26 2 12.25 0.86
 -4 26 -2 11.49 0.85
 4 26 3 19.95 1.1
 -4 26 3 21.29 1.15
 -4 -26 -3 21.31 1.12
 4 26 -3 21.05 1.09
 -4 26 -3 20.18 1.12
 4 26 -4 0.07 0.17
 -4 26 4 0.27 0.22
 4 26 4 -0.03 0.24
 -4 -26 -4 0.14 0.12
 -4 26 -4 0.32 0.25
 -4 -26 -5 1.75 0.34
 -4 26 5 2.21 0.39
 4 26 -5 2.29 0.4
 4 26 5 2.45 0.41
 -4 -26 -6 0.04 0.14
 4 26 6 -0.29 0.31
 -4 26 6 0.04 0.2
 -4 26 7 -0.06 0.19
 -4 26 7 -0.03 0.16
 4 26 7 0.29 0.22
 4 26 8 32.26 1.46
 -4 26 8 32.55 1.35
 4 26 9 19.79 1.14
 -4 26 9 17.24 1.02
 4 26 10 39.46 1.61
 4 26 10 38.39 1.55
 -4 26 10 42.82 1.6
 -4 26 11 13.04 0.89
 4 26 11 11.16 0.89
 4 26 12 3.48 0.49
 -4 26 12 4.46 0.52
 -4 26 13 1.7 0.35
 4 26 13 1.96 0.37
 -4 26 14 3.74 0.46
 -4 26 15 0.18 0.17
 -4 26 16 0.02 0.15
 -4 26 17 -0.13 0.14
 -4 28 0 26.5 1.33
 4 28 0 26.46 1.31
 -4 28 1 65.54 2.08
 4 28 1 65.66 1.97
 4 28 -1 65.1 1.99
 -4 28 -1 64.81 2.04
 -4 28 -2 17.88 1.11
 -4 28 2 16.29 1.07
 4 28 -2 16.48 1.01
 4 28 2 16.42 1.02
 4 28 3 9.8 0.79
 4 28 -3 10.8 0.83
 -4 28 -3 9.98 0.84
 -4 28 3 9.69 0.85
 4 28 -4 0.1 0.18
 4 28 4 -0.01 0.19
 -4 28 4 0.23 0.26
 -4 28 -4 0.03 0.23
 -4 28 5 0.3 0.21
 4 28 5 0.44 0.21
 4 28 -5 0.37 0.19
 -4 28 6 0.84 0.29
 4 28 6 1.06 0.33
 -4 28 7 3.6 0.51
 -4 28 7 2.12 0.33
 4 28 7 3.23 0.5
 -4 28 8 7.95 0.69
 4 28 8 9.9 0.84
 4 28 9 10.21 0.85
 -4 28 9 8.57 0.75
 4 28 10 39.7 1.6
 4 28 10 38.79 1.64
 -4 28 10 40.55 1.59
 -4 28 11 6.8 0.66
 4 28 11 6.73 0.69
 -4 28 12 12.07 0.86
 4 28 12 11.25 0.86
 -4 28 13 1.65 0.34
 4 28 13 1.9 0.37
 -4 28 14 0.55 0.16
 -4 28 15 0 0.15
 -4 28 16 0.17 0.15
 -4 30 0 17.52 1.12
 4 30 0 16.97 1.05
 -4 30 1 10.93 0.89
 4 30 -1 10.92 0.86
 4 30 1 9.63 0.81
 -4 30 -1 10 0.88
 -4 30 -2 7.99 0.78
 -4 30 2 8.48 0.81
 4 30 2 7.08 0.69
 4 30 -2 7.9 0.74
 -4 30 -3 0.51 0.27
 4 30 -3 0.17 0.22
 4 30 3 0.18 0.22
 -4 30 3 0.04 0.21
 4 30 4 1.39 0.36
 -4 30 4 1.58 0.38
 4 30 -4 1.14 0.3
 4 30 -5 1.75 0.38
 4 30 5 1.76 0.39
 -4 30 5 1.9 0.42
 -4 30 6 -0.19 0.28
 -4 30 6 0.35 0.25
 4 30 6 0.64 0.33
 -4 30 7 2.29 0.44
 4 30 7 2.42 0.43
 -4 30 7 2.83 0.41
 -4 30 8 -0.4 0.35
 4 30 8 0.35 0.28
 4 30 9 4.06 0.54
 -4 30 9 3.24 0.49
 4 30 10 7.38 0.7
 -4 30 10 8.38 0.76
 4 30 10 9.03 0.81
 -4 30 11 8.68 0.77
 4 30 11 8.52 0.79
 -4 30 12 7.04 0.65
 4 30 12 6.71 0.67
 -4 30 13 -0.32 0.24
 4 30 13 -0.15 0.19
 -4 30 14 1.93 0.36
 -4 30 15 1.13 0.3
 -4 30 16 0.8 0.22
 -4 32 0 0.65 0.28
 4 32 0 0.54 0.25
 -4 32 -1 0.09 0.32
 -4 32 1 0.34 0.25
 4 32 1 0.39 0.26
 4 32 -1 -0.03 0.25
 4 32 2 5.86 0.66
 -4 32 -2 5.01 0.63
 -4 32 2 5.75 0.7
 4 32 -2 5.43 0.66
 4 32 -3 1.01 0.32
 -4 32 3 1.01 0.35
 4 32 3 0.78 0.27
 -4 32 -3 0.58 0.27
 -4 32 4 2.97 0.52
 4 32 -4 3.61 0.55
 4 32 4 3.64 0.54
 4 32 -5 3.35 0.53
 -4 32 5 2.92 0.52
 4 32 5 3.08 0.57
 -4 32 6 21.39 1.16
 -4 32 6 21.64 1.28
 4 32 6 24.08 1.34
 -4 32 7 18.56 1.16
 4 32 7 19.23 1.23
 -4 32 7 20.88 1.17
 -4 32 8 0.83 0.28
 4 32 8 0.84 0.29
 -4 32 9 0.19 0.2
 4 32 9 0.14 0.19
 4 32 10 3.57 0.5
 -4 32 10 3.95 0.53
 4 32 10 5.07 0.61
 4 32 11 2.36 0.43
 -4 32 11 2.18 0.39
 4 32 12 -0.13 0.17
 -4 32 12 -0.15 0.23
 -4 32 13 0.14 0.15
 4 32 13 0.23 0.16
 -4 32 14 3.79 0.47
 -4 32 15 5.51 0.54
 4 34 0 1.82 0.43
 -4 34 0 1.05 0.31
 -4 34 1 9.05 0.92
 -4 34 -1 8.28 0.83
 4 34 -1 9.56 0.89
 4 34 1 9.52 0.87
 -4 34 -2 3.56 0.55
 4 34 -2 4.83 0.64
 4 34 2 3.81 0.56
 -4 34 2 3.94 0.62
 -4 34 3 1.22 0.41
 4 34 3 1.3 0.3
 4 34 -3 1.88 0.43
 4 34 -4 8.75 0.83
 4 34 4 7.81 0.8
 -4 34 4 8.35 0.86
 4 34 -5 21.37 1.3
 4 34 5 20.89 1.28
 -4 34 5 19.79 1.34
 -4 34 6 44 1.76
 -4 34 6 47.32 1.92
 4 34 6 50.14 1.97
 -4 34 7 10.29 0.89
 4 34 7 11.99 0.96
 -4 34 7 11.47 0.9
 4 34 8 10.25 0.89
 -4 34 8 9.78 0.85
 -4 34 9 0.15 0.21
 4 34 9 0.18 0.22
 4 34 9 -0.03 0.19
 -4 34 10 0.11 0.19
 4 34 10 -0.01 0.18
 4 34 10 0.42 0.24
 4 34 11 0.39 0.22
 -4 34 11 -0.16 0.23
 -4 34 12 0.51 0.23
 4 34 12 0.33 0.17
 -4 34 13 3.67 0.47
 4 34 13 2.38 0.34
 -4 34 14 3.27 0.41
 4 36 0 18.71 1.23
 -4 36 0 18.77 1.31
 -4 36 -1 -0.36 0.54
 4 36 -1 0.51 0.26
 -4 36 1 0.3 0.35
 4 36 1 0.67 0.37
 4 36 -2 1.31 0.39
 4 36 2 1.03 0.34
 -4 36 2 1.15 0.39
 4 36 3 0.53 0.25
 4 36 -3 0.57 0.31
 -4 36 3 0.81 0.37
 4 36 -4 38.46 1.75
 -4 36 4 39.01 1.84
 4 36 4 35.3 1.62
 -4 36 5 21.81 1.25
 -4 36 5 21.98 1.38
 4 36 -5 20.3 1.28
 4 36 5 20.22 1.28
 -4 36 6 19.42 1.2
 -4 36 6 22.04 1.35
 4 36 6 22.7 1.31
 4 36 7 15.13 1.11
 -4 36 7 15.32 1.05
 -4 36 8 1.57 0.38
 4 36 8 1.86 0.39
 -4 36 9 0.32 0.21
 4 36 9 0.17 0.19
 4 36 9 0.45 0.22
 4 36 10 -0.09 0.18
 -4 36 10 -0.02 0.18
 4 36 11 0.23 0.19
 -4 36 11 -0.23 0.24
 -4 36 12 1.12 0.29
 4 36 12 0.53 0.2
 -4 36 13 3.13 0.4
 -4 38 0 17.26 1.3
 4 38 0 16.15 1.16
 4 38 1 -0.07 0.25
 -4 38 1 0.22 0.31
 4 38 -1 0.13 0.23
 -4 38 2 -0.23 0.35
 4 38 2 -0.01 0.26
 4 38 -2 0.13 0.23
 -4 38 3 4.13 0.65
 4 38 3 4.03 0.6
 4 38 -3 3.59 0.6
 4 38 -4 24.81 1.42
 4 38 4 24.07 1.36
 -4 38 4 26.38 1.55
 4 38 -5 2.25 0.45
 -4 38 5 2.41 0.47
 4 38 5 2.01 0.41
 -4 38 5 2.94 0.56
 -4 38 6 7.75 0.76
 4 38 6 8.99 0.83
 -4 38 7 1.36 0.36
 4 38 7 1.22 0.35
 -4 38 8 0.68 0.27
 4 38 8 0.87 0.28
 -4 38 9 0.41 0.21
 4 38 9 0.38 0.2
 4 38 9 0.31 0.19
 4 38 10 0.81 0.26
 -4 38 10 0.29 0.19
 4 38 11 -0.04 0.15
 -4 38 11 0.06 0.15
 -4 38 12 0.13 0.15
 4 38 12 -0.5 0.2
 4 40 0 53.94 2.05
 4 40 1 1.69 0.5
 4 40 -1 2.17 0.54
 4 40 2 -0.31 0.37
 4 40 -2 0.25 0.23
 4 40 -3 0.22 0.23
 4 40 3 0.48 0.25
 -4 40 4 3.01 0.49
 4 40 -4 3.11 0.52
 4 40 4 3.34 0.53
 4 40 -5 0.93 0.29
 4 40 5 0.34 0.21
 -4 40 5 0.98 0.32
 4 40 6 -0.46 0.38
 -4 40 6 0.18 0.2
 4 40 7 -0.62 0.31
 -4 40 7 -0.26 0.23
 -4 40 8 1.27 0.32
 4 40 8 1.45 0.33
 4 40 8 1.73 0.36
 4 40 9 4.92 0.54
 -4 40 9 4.77 0.56
 4 40 9 5.39 0.59
 4 40 10 2.18 0.37
 -4 40 10 1.43 0.31
 -4 40 11 4.15 0.48
 4 40 11 2.76 0.36
 4 42 0 53.44 2
 4 42 -1 3.53 0.58
 4 42 1 3.27 0.57
 4 42 2 15.03 1.05
 4 42 -2 13.99 1.04
 -4 42 3 0.68 0.24
 4 42 -3 0.41 0.2
 4 42 3 1.01 0.33
 -4 42 4 0.17 0.24
 4 42 -4 0.23 0.2
 4 42 4 -0.24 0.26
 -4 42 5 0.06 0.17
 4 42 5 -0.04 0.28
 4 42 -5 0.51 0.26
 4 42 6 -0.39 0.32
 -4 42 6 0.15 0.17
 4 42 7 4.35 0.54
 4 42 7 3.51 0.49
 -4 42 7 3.33 0.47
 4 42 8 5.76 0.6
 -4 42 8 5.94 0.6
 4 42 8 6.39 0.62
 4 42 9 12.13 0.81
 -4 42 9 10.62 0.77
 -4 42 10 3.46 0.44
 4 42 10 2.52 0.37
 4 44 0 31.26 1.45
 4 44 1 3.82 0.56
 -4 44 1 1.93 0.39
 4 44 -1 3.31 0.55
 -4 44 2 11.66 0.86
 4 44 2 12.16 0.89
 4 44 -2 11.4 0.9
 -4 44 3 0.2 0.2
 4 44 -3 -0.1 0.26
 4 44 3 0.47 0.24
 -4 44 4 0.19 0.17
 4 44 -4 0.15 0.18
 4 44 4 -0.34 0.25
 -4 44 5 0.28 0.21
 4 44 5 -0.15 0.24
 -4 44 6 0.32 0.18
 4 44 6 -0.02 0.19
 4 44 7 3.62 0.49
 -4 44 7 2.95 0.42
 4 44 7 2.96 0.42
 4 44 8 4.33 0.47
 -4 44 8 4.99 0.52
 4 44 8 5.64 0.57
 4 46 0 17.22 1.01
 4 46 -1 2.34 0.4
 4 46 1 2.46 0.41
 4 46 -2 3.79 0.49
 4 46 2 4.4 0.52
 -4 46 2 4.07 0.48
 4 46 3 -0.19 0.19
 4 46 -3 -0.07 0.18
 -4 46 3 0.2 0.15
 4 46 4 -0.06 0.17
 -4 46 4 -0.01 0.14
 4 46 5 -0.16 0.17
 -4 46 5 -0.02 0.15
 -4 46 6 -0.01 0.15
 4 46 6 0.11 0.19
 4 46 6 -0.12 0.16
 4 48 0 1.22 0.27
 4 48 -1 0.65 0.21
 4 48 1 0.66 0.2
 4 48 2 0.05 0.14
 4 48 -2 0.17 0.15
 4 48 3 -0.08 0.17
 -5 -1 0 1.45 0.15
 -5 1 0 1.49 0.15
 -5 -1 1 192.57 1.69
 -5 1 1 194.55 1.6
 -5 -1 2 12.6 0.47
 -5 1 2 13.6 0.47
 -5 1 3 403.88 2.73
 -5 -1 3 414.12 2.78
 -5 -1 4 68.55 1.25
 -5 1 4 68.51 1.21
 -5 -1 5 54.22 1.18
 -5 1 5 52.57 1.13
 -5 1 6 13.9 0.66
 -5 -1 6 14 0.64
 -5 1 7 24.83 0.93
 -5 -1 7 25.87 0.93
 -5 1 8 2.58 0.37
 -5 -1 8 3.12 0.36
 -5 -1 8 3.29 0.42
 -5 -1 8 2.47 0.35
 -5 1 8 2.32 0.32
 -5 1 8 2.85 0.35
 -5 -1 9 1.15 0.29
 -5 -1 9 0.93 0.2
 -5 1 9 0.85 0.23
 -5 -1 9 0.77 0.22
 -5 1 9 0.68 0.19
 -5 1 9 1.1 0.21
 5 1 10 0.73 0.18
 -5 1 10 1.05 0.24
 5 -1 10 0.95 0.2
 -5 1 10 1.25 0.3
 -5 -1 10 1 0.22
 -5 -1 10 1.02 0.26
 -5 1 10 1.11 0.26
 5 -1 11 -0.14 0.2
 5 1 11 0.04 0.17
 -5 1 11 -0.2 0.24
 -5 -1 11 -0.1 0.19
 -5 1 11 0.12 0.19
 5 1 12 1.29 0.3
 5 -1 12 1.18 0.31
 -5 -1 12 1.15 0.31
 -5 1 12 1.37 0.36
 5 -1 13 0.39 0.21
 5 1 13 0.45 0.24
 -5 -1 13 0.43 0.27
 -5 1 13 0.55 0.32
 5 -1 14 21.62 1.16
 5 1 14 22.49 1.17
 -5 -1 14 23.39 1.32
 -5 1 14 23.29 1.3
 5 -1 15 1.2 0.35
 5 1 15 1.14 0.35
 -5 -1 15 1.51 0.49
 -5 1 15 1.51 0.47
 5 -1 16 27.16 1.3
 5 1 16 27.62 1.3
 5 -1 17 0.63 0.25
 5 1 17 0.58 0.24
 5 -1 18 1.17 0.25
 5 1 18 1.4 0.3
 5 -1 19 0.02 0.12
 5 1 19 0.06 0.11
 5 1 20 0.12 0.11
 -5 3 0 5.94 0.26
 -5 -3 0 6.47 0.31
 -5 -3 1 6.2 0.32
 -5 3 1 6.82 0.29
 -5 3 2 12.82 0.43
 -5 -3 2 14.54 0.51
 -5 3 3 4.87 0.31
 -5 -3 3 5.38 0.35
 -5 -3 4 22.27 0.75
 -5 3 4 23.79 0.7
 -5 -3 5 122.87 1.8
 -5 3 5 121.29 1.75
 -5 3 6 33.16 0.99
 -5 -3 6 30.49 0.95
 -5 -3 7 4.46 0.41
 -5 3 7 4.53 0.41
 -5 -3 8 0.68 0.2
 -5 3 8 0.85 0.18
 -5 3 8 1.12 0.25
 -5 -3 8 0.72 0.22
 -5 3 8 1.04 0.23
 -5 3 9 10.68 0.68
 -5 3 9 11.59 0.75
 -5 -3 9 10.47 0.74
 -5 3 9 9.7 0.71
 -5 -3 9 10 0.68
 5 3 10 14.07 0.84
 -5 3 10 16.73 0.97
 -5 -3 10 17.54 0.95
 -5 -3 10 16.25 0.95
 -5 3 10 17.35 0.95
 5 -3 10 16.19 0.92
 5 -3 11 2.16 0.37
 5 3 11 1.5 0.31
 -5 3 11 1.61 0.34
 -5 -3 11 0.91 0.23
 -5 -3 11 1.9 0.41
 -5 3 11 1.72 0.39
 5 -3 12 1.38 0.33
 -5 3 12 1.29 0.37
 -5 -3 12 1.02 0.31
 5 3 12 1.06 0.26
 -5 3 12 1.39 0.36
 -5 -3 13 0.73 0.31
 5 3 13 0.37 0.2
 5 -3 13 0.47 0.19
 -5 3 13 0.39 0.3
 5 3 14 10.96 0.82
 -5 -3 14 12.11 0.96
 -5 3 14 11.46 0.94
 5 -3 14 10.77 0.83
 5 -3 15 0.62 0.22
 5 3 15 0.9 0.3
 -5 3 15 0.35 0.28
 -5 3 16 25.92 1.37
 5 -3 16 22.68 1.22
 5 3 16 23.93 1.21
 5 -3 17 1.2 0.31
 5 3 17 2.09 0.39
 5 3 18 0.05 0.14
 5 -3 18 -0.07 0.13
 5 -3 19 0.38 0.18
 5 3 19 0.23 0.14
 5 3 20 1.43 0.26
 -5 -5 0 4.44 0.27
 -5 5 0 4.18 0.21
 -5 -5 1 23.53 0.64
 -5 5 1 23.76 0.52
 -5 5 2 3.6 0.23
 -5 -5 2 3.19 0.26
 -5 -5 3 18.39 0.64
 -5 5 3 17.37 0.56
 -5 -5 4 4.26 0.34
 -5 5 4 4.72 0.33
 -5 -5 5 11.08 0.57
 -5 5 5 10.69 0.53
 -5 5 6 7.16 0.46
 -5 -5 6 5.93 0.45
 -5 5 7 6.2 0.46
 -5 -5 7 6.43 0.49
 -5 -5 8 37.99 1.24
 -5 5 8 36.12 1.22
 -5 5 8 37.96 1.24
 -5 5 9 24.74 1.08
 -5 -5 9 22.57 1.02
 -5 5 9 24.84 1.09
 5 -5 10 43.22 1.54
 -5 -5 10 46.89 1.55
 -5 -5 10 42.98 1.54
 -5 5 10 44.83 1.56
 -5 5 10 44.59 1.54
 5 5 10 42.72 1.44
 -5 5 11 12.25 0.89
 5 5 11 9.8 0.76
 -5 -5 11 8.67 0.71
 -5 -5 11 12.92 0.94
 -5 5 11 11.52 0.84
 5 -5 11 13.69 0.89
 -5 5 12 1.83 0.4
 5 -5 12 1.34 0.32
 5 5 12 1.53 0.32
 -5 -5 12 1.36 0.36
 -5 5 12 1.78 0.38
 5 -5 13 1.21 0.32
 -5 5 13 0.95 0.4
 5 5 13 0.64 0.22
 -5 -5 13 1.26 0.38
 -5 5 13 0.92 0.3
 5 -5 14 1.57 0.29
 5 5 14 1.8 0.34
 -5 -5 14 2.12 0.45
 -5 5 14 2.61 0.45
 5 5 15 1.93 0.38
 5 -5 15 1.31 0.3
 -5 5 15 1.93 0.41
 -5 5 16 13.42 1.02
 5 -5 16 12.49 0.92
 5 5 16 12.45 0.91
 5 -5 17 0.24 0.19
 5 5 17 0.1 0.17
 5 -5 18 2.74 0.4
 5 5 18 2.63 0.4
 5 -5 19 1.76 0.33
 5 5 19 2.33 0.35
 5 5 20 4.68 0.46
 -5 7 0 50.89 0.65
 -5 -7 0 50.45 0.93
 -5 -7 1 77.49 1.22
 -5 7 -1 81.02 0.86
 -5 7 2 6.35 0.3
 -5 -7 2 6.08 0.37
 -5 -7 3 7.08 0.42
 -5 7 3 7.15 0.37
 -5 7 4 12.1 0.52
 -5 -7 4 10.82 0.56
 -5 -7 5 12.09 0.62
 -5 7 5 12.37 0.57
 -5 -7 6 3.58 0.36
 -5 7 6 4.1 0.36
 -5 7 7 1.41 0.23
 -5 -7 7 1.16 0.22
 -5 -7 8 16 0.83
 -5 7 8 17.42 0.85
 -5 -7 8 16.7 0.94
 -5 7 8 17.49 0.89
 5 -7 9 68.17 1.85
 -5 -7 9 57.99 1.69
 -5 7 9 61.16 1.7
 -5 -7 9 74.68 2.03
 -5 7 9 55.7 1.67
 5 -7 10 86.46 2.16
 -5 -7 10 90.93 2.23
 5 7 10 94.14 2.16
 -5 7 10 95.06 2.22
 -5 -7 10 86.39 2.26
 -5 7 10 96.86 2.23
 5 -7 11 25.39 1.23
 5 7 11 18.19 1.02
 -5 7 11 21.23 1.15
 -5 -7 11 25.82 1.29
 -5 7 11 21.52 1.13
 -5 -7 11 17.15 1.01
 5 -7 12 34.15 1.44
 5 7 12 37.06 1.48
 -5 -7 12 34.7 1.56
 -5 7 12 40.54 1.68
 -5 7 12 38.31 1.58
 -5 7 13 1.89 0.48
 5 -7 13 1.31 0.32
 5 7 13 1.25 0.3
 -5 -7 13 1.27 0.37
 -5 7 13 1.73 0.38
 5 7 14 0.2 0.2
 5 -7 14 0.31 0.18
 -5 7 14 0.32 0.19
 5 7 15 5.4 0.6
 -5 7 15 5.38 0.64
 5 -7 15 4.26 0.54
 -5 7 16 4.15 0.59
 5 -7 16 3.68 0.5
 5 7 16 3.78 0.5
 5 7 17 0.58 0.23
 5 -7 17 0.58 0.22
 5 -7 18 3.78 0.47
 5 7 18 3.71 0.46
 5 7 19 7.38 0.62
 5 7 20 5.96 0.5
 -5 -9 0 48.4 0.96
 -5 9 0 40.3 0.5
 -5 9 1 100.03 0.93
 -5 -9 1 99.83 1.44
 -5 9 2 31.53 0.63
 -5 -9 2 31.1 0.86
 -5 -9 3 19.51 0.72
 -5 9 3 19.23 0.56
 -5 9 4 5.47 0.35
 -5 -9 4 4.96 0.39
 -5 -9 5 0.28 0.13
 -5 9 5 0.33 0.11
 -5 -9 6 2.99 0.35
 -5 9 7 6.44 0.5
 -5 -9 7 6.75 0.53
 -5 -9 8 9.57 0.69
 -5 9 8 11.04 0.7
 -5 9 8 12.05 0.74
 -5 -9 9 41.74 1.47
 -5 9 9 42.97 1.41
 -5 9 9 37.8 1.37
 5 -9 9 42.66 1.46
 5 9 10 88.14 2.13
 -5 9 10 83.22 2.1
 -5 9 10 87.55 2.14
 5 -9 11 70.65 2.02
 5 9 11 57.94 1.86
 -5 9 11 64.78 1.95
 -5 -9 11 56.03 1.91
 -5 9 11 63.56 1.93
 5 -9 12 33.84 1.44
 -5 9 12 38.44 1.61
 5 9 12 36.99 1.5
 -5 9 12 36.64 1.56
 5 -9 13 1.52 0.32
 5 9 13 1.11 0.29
 -5 9 13 1.66 0.44
 -5 9 13 1.38 0.34
 5 9 14 5.14 0.58
 -5 9 14 5.42 0.72
 -5 9 14 4.7 0.59
 5 -9 14 4.35 0.53
 5 -9 15 0.04 0.21
 5 9 15 -0.07 0.23
 -5 9 15 0.17 0.2
 5 -9 16 0 0.17
 5 9 16 -0.33 0.25
 -5 9 16 -0.11 0.24
 5 9 17 0.53 0.23
 5 -9 17 0.28 0.17
 5 9 18 5.75 0.59
 5 9 19 6.05 0.55
 -5 -11 0 99.13 1.44
 -5 -11 -1 52.32 1.08
 -5 -11 1 50.07 1.07
 -5 -11 2 39.36 1
 -5 -11 3 4.07 0.35
 -5 -11 4 1.88 0.26
 -5 -11 5 10.32 0.62
 -5 -11 6 61.48 1.56
 -5 11 7 2.68 0.35
 -5 -11 7 2.38 0.31
 -5 -11 8 8.15 0.63
 -5 11 8 8.62 0.63
 5 11 8 6.97 0.65
 -5 11 8 8.18 0.6
 -5 -11 9 33.9 1.37
 -5 11 9 33.89 1.26
 -5 11 9 32.31 1.24
 -5 11 10 71.12 1.94
 -5 11 10 73.36 2.04
 -5 -11 10 69.62 2.06
 5 -11 11 38.59 1.48
 5 11 11 40.73 1.56
 -5 11 11 40.18 1.52
 -5 -11 11 38.07 1.61
 -5 11 11 39.65 1.56
 5 11 12 15.31 1.01
 -5 11 12 13.81 0.95
 -5 11 12 15.14 1.02
 5 11 13 2.24 0.42
 5 -11 13 1.98 0.37
 -5 11 13 1.89 0.44
 -5 11 13 2.48 0.47
 5 -11 14 -0.14 0.2
 5 11 14 -0.33 0.26
 -5 11 14 0.13 0.24
 -5 11 14 0.39 0.24
 -5 11 15 1.66 0.4
 5 11 15 1.02 0.28
 -5 11 15 1.07 0.31
 5 11 16 1.1 0.32
 -5 11 16 1.09 0.32
 5 11 17 0.6 0.23
 5 11 18 0.37 0.2
 5 11 19 5.58 0.53
 -5 -13 0 73.61 1.32
 -5 -13 1 47.92 1.09
 -5 -13 -1 50.5 1.13
 -5 -13 2 0.32 0.14
 -5 -13 3 5.78 0.42
 -5 -13 4 11.64 0.64
 -5 -13 5 110.8 2.09
 -5 -13 6 72.33 1.76
 -5 13 6 77.36 1.71
 -5 13 7 22.32 0.95
 -5 -13 7 22.17 1.02
 5 13 8 0.68 0.24
 -5 13 8 1.01 0.24
 -5 -13 8 0.6 0.2
 -5 13 8 1.19 0.28
 -5 -13 9 33.57 1.42
 -5 13 9 33.77 1.28
 -5 13 9 31.18 1.23
 -5 13 10 25.37 1.15
 -5 13 10 27.83 1.26
 -5 -13 10 24.02 1.26
 5 13 11 7.58 0.71
 -5 -13 11 6.57 0.71
 -5 13 11 6.07 0.61
 -5 13 11 7.35 0.7
 5 13 12 0.43 0.23
 -5 13 12 0.15 0.21
 -5 -13 12 0.38 0.19
 -5 13 12 0.83 0.31
 5 13 13 0.48 0.24
 -5 13 13 0.35 0.27
 -5 13 13 0.29 0.19
 5 13 14 0.86 0.27
 -5 13 14 0.94 0.29
 -5 13 15 9.02 0.83
 -5 13 15 8.09 0.78
 5 13 15 8.14 0.75
 -5 13 16 4.29 0.58
 5 13 16 4.83 0.59
 5 13 17 1.32 0.32
 5 13 18 0.29 0.19
 5 13 19 1.19 0.26
 -5 -15 0 72.07 1.39
 -5 -15 1 1.41 0.22
 -5 -15 -1 1.37 0.2
 -5 -15 2 5.21 0.4
 -5 -15 3 16.5 0.76
 -5 -15 4 267.68 3.2
 -5 -15 5 76.06 1.83
 -5 15 5 72.14 1.6
 -5 -15 6 84.21 1.99
 5 15 6 88.76 2.27
 -5 -15 7 42.03 1.47
 -5 15 7 39.71 1.3
 -5 15 8 0.1 0.14
 -5 15 8 0.15 0.18
 -5 -15 8 -0.01 0.14
 5 15 8 0.03 0.19
 5 15 9 4.59 0.51
 5 15 9 3.17 0.4
 -5 -15 9 4.49 0.55
 -5 15 9 4.42 0.52
 -5 15 9 4.37 0.49
 -5 -15 10 4.73 0.6
 -5 15 10 5.3 0.56
 5 15 10 5.84 0.64
 -5 15 10 4.69 0.55
 5 15 11 0.15 0.19
 -5 -15 11 0.17 0.2
 -5 15 11 0.11 0.19
 5 15 12 0.11 0.22
 -5 -15 12 0.02 0.13
 -5 15 12 -0.12 0.24
 -5 15 12 0.14 0.21
 5 15 13 11.83 0.91
 -5 15 13 10.27 0.83
 -5 15 13 11.51 0.91
 5 15 14 6.39 0.69
 -5 15 14 6.48 0.72
 -5 15 14 5.76 0.67
 -5 15 15 28.33 1.44
 -5 15 15 29.47 1.49
 5 15 15 31.49 1.49
 -5 15 16 7.53 0.72
 5 15 16 8.21 0.75
 5 15 17 6.18 0.64
 5 15 18 0.06 0.13
 5 15 19 0.12 0.12
 -5 -17 0 7.25 0.48
 -5 -17 1 4.67 0.39
 -5 -17 -1 4.87 0.4
 -5 -17 2 10.54 0.61
 -5 -17 -2 10.03 0.59
 -5 -17 3 53.25 1.45
 5 17 4 150.85 2.76
 -5 -17 4 141.8 2.46
 -5 17 5 77.22 1.69
 -5 -17 5 79.86 1.98
 5 17 6 130.52 2.69
 -5 17 6 125.98 2.26
 -5 -17 7 35.91 1.43
 -5 17 7 35.04 1.24
 -5 -17 8 2.73 0.42
 -5 17 8 2.94 0.4
 -5 17 8 2.41 0.37
 5 17 8 3.11 0.44
 5 17 9 0.28 0.16
 5 17 9 0.1 0.15
 5 17 9 -0.01 0.17
 -5 -17 9 0.24 0.19
 -5 17 9 0.3 0.17
 -5 17 9 0.4 0.25
 5 17 10 1.47 0.29
 -5 -17 10 1.54 0.36
 5 17 10 1.5 0.36
 -5 17 10 1.67 0.35
 -5 17 10 1.55 0.33
 -5 17 11 -0.2 0.3
 -5 17 11 0.14 0.18
 -5 -17 11 0.35 0.2
 5 17 11 0.16 0.19
 5 17 12 0.8 0.32
 -5 17 12 0.35 0.19
 -5 17 12 0.93 0.32
 5 17 13 16.94 1.12
 -5 17 13 16.46 1.08
 -5 17 13 14.01 0.97
 5 17 14 5.17 0.66
 -5 17 14 4.89 0.67
 -5 17 14 4.28 0.64
 -5 17 15 50.79 1.87
 5 17 15 54.01 1.91
 -5 17 16 5.34 0.65
 5 17 16 5.65 0.67
 5 17 17 12.62 0.87
 5 17 18 0.16 0.13
 -5 19 0 15.4 0.82
 5 19 0 16.32 0.83
 -5 -19 0 16.03 0.76
 -5 19 1 1.84 0.32
 -5 19 -1 1.83 0.32
 -5 -19 -1 2.36 0.3
 5 19 1 2.05 0.32
 -5 -19 1 2.09 0.28
 -5 19 2 46.1 1.49
 5 19 2 44.77 1.41
 -5 -19 2 41.6 1.3
 -5 19 -2 47.61 1.44
 -5 -19 -2 42.39 1.26
 -5 19 3 14.4 0.84
 -5 -19 -3 18.73 0.91
 5 19 3 12.98 0.8
 -5 -19 3 17.91 0.91
 -5 -19 4 118.43 2.41
 -5 19 4 120.32 2.43
 5 19 4 125.93 2.5
 -5 19 5 40.38 1.28
 5 19 5 39.19 1.44
 -5 -19 5 43.2 1.54
 -5 -19 6 79.25 2.14
 -5 19 6 76.47 1.95
 -5 19 6 83.43 1.89
 5 19 7 41.84 1.53
 -5 -19 7 46 1.72
 -5 19 7 42.64 1.41
 -5 -19 8 2.08 0.39
 -5 19 8 3 0.4
 5 19 8 2.99 0.46
 5 19 9 3.8 0.51
 5 19 9 3.7 0.47
 -5 -19 9 4.58 0.62
 -5 19 9 4.16 0.49
 5 19 10 1.59 0.31
 5 19 10 1.91 0.41
 -5 -19 10 1.29 0.35
 -5 19 10 1.61 0.32
 -5 19 10 1.84 0.36
 5 19 11 0.02 0.19
 5 19 11 0.12 0.21
 -5 -19 11 0.17 0.15
 -5 19 11 0.17 0.16
 -5 19 11 -0.05 0.23
 5 19 12 0.18 0.23
 -5 19 12 -0.25 0.26
 -5 19 12 0.41 0.22
 5 19 13 14.62 1.01
 -5 19 13 11.87 0.87
 -5 19 13 13.05 0.95
 5 19 14 1.84 0.43
 -5 19 14 1.53 0.4
 -5 19 14 1.75 0.44
 -5 19 15 41.65 1.66
 5 19 15 47.68 1.82
 -5 19 16 3.28 0.53
 5 19 16 3.29 0.5
 5 19 17 13.34 0.89
 5 19 18 0.1 0.11
 -5 21 0 172.17 2.84
 5 21 0 168.84 2.79
 -5 -21 1 1.37 0.26
 -5 21 1 0.86 0.28
 -5 21 -1 0.88 0.28
 5 21 -1 1.03 0.3
 5 21 1 0.81 0.27
 -5 -21 -1 1.64 0.29
 -5 -21 2 1.31 0.25
 5 21 -2 1.58 0.29
 5 21 2 1.31 0.28
 -5 21 2 1.31 0.3
 -5 21 -2 1.41 0.3
 -5 -21 -2 1.54 0.26
 -5 21 3 4.54 0.51
 -5 -21 -3 4.14 0.45
 5 21 -3 3.78 0.44
 5 21 3 3.98 0.48
 -5 -21 3 3.36 0.42
 -5 -21 4 92.25 2.29
 5 21 4 92.18 2.21
 5 21 -4 87.49 2.03
 -5 -21 5 25.2 1.25
 5 21 5 23.69 1.12
 -5 21 5 22.68 1.12
 -5 21 6 39.61 1.35
 -5 21 6 37.9 1.42
 -5 -21 6 37.57 1.57
 -5 -21 7 8.87 0.81
 -5 21 7 8.74 0.66
 5 21 7 9.07 0.74
 -5 21 8 0.24 0.18
 -5 -21 8 0.39 0.2
 5 21 8 0.39 0.22
 5 21 8 0.55 0.25
 5 21 9 3.58 0.51
 5 21 9 3.36 0.46
 -5 -21 9 3.19 0.55
 -5 21 9 3.38 0.45
 -5 -21 10 4.27 0.65
 5 21 10 6.02 0.68
 -5 21 10 5.07 0.56
 5 21 10 4.94 0.56
 5 21 10 4.45 0.54
 5 21 11 8.4 0.81
 -5 21 11 8.13 0.69
 5 21 11 7.33 0.69
 -5 -21 11 8.18 0.9
 5 21 12 -0.11 0.2
 -5 21 12 -0.49 0.31
 -5 21 12 0.37 0.22
 5 21 13 1.31 0.32
 -5 21 13 0.36 0.21
 -5 21 13 1.42 0.35
 5 21 14 0.52 0.29
 -5 21 14 0.02 0.21
 -5 21 15 21.03 1.17
 5 21 15 23.15 1.24
 5 21 16 1.81 0.37
 -5 21 16 1.39 0.34
 5 21 17 4.82 0.52
 -5 -23 0 149.33 2.69
 -5 23 0 144.79 2.75
 5 23 0 148.36 2.75
 -5 23 -1 9.16 0.75
 -5 23 1 8.15 0.75
 5 23 -1 7.98 0.72
 -5 -23 -1 3.75 0.46
 5 23 1 8.06 0.73
 -5 -23 1 3.16 0.45
 -5 23 2 22.06 1.15
 5 23 -2 24.39 1.12
 -5 -23 -2 22.1 1.03
 -5 23 -2 21.43 1.09
 5 23 2 20.22 1.04
 -5 -23 2 22.07 1.1
 -5 23 3 2.82 0.44
 -5 -23 -3 2.38 0.36
 5 23 -3 2.56 0.39
 5 23 3 2.67 0.39
 -5 23 -3 3.37 0.47
 -5 -23 3 2.35 0.39
 -5 23 4 24.76 1.25
 -5 -23 -4 22.84 1.14
 5 23 -4 22.59 1.09
 5 23 4 21.67 1.11
 -5 -23 4 24.87 1.3
 5 23 5 20.9 1.08
 -5 -23 5 20.33 1.23
 5 23 -5 17.33 0.98
 -5 23 5 19.1 1.09
 -5 23 6 13.04 0.81
 -5 23 6 14.41 0.92
 5 23 6 14.27 0.92
 -5 -23 6 13.45 1.03
 -5 23 7 0 0.18
 5 23 7 -0.12 0.22
 -5 -23 7 0.03 0.15
 5 23 8 1.52 0.32
 -5 -23 8 1.67 0.4
 5 23 8 1.55 0.34
 -5 23 8 1.48 0.32
 5 23 9 11.97 0.92
 5 23 9 11.49 0.88
 -5 23 9 11.95 0.83
 -5 -23 9 12.48 1.11
 5 23 10 9.06 0.76
 5 23 10 10.41 0.88
 5 23 10 10.13 0.8
 -5 -23 10 7.35 0.9
 -5 23 10 10.44 0.79
 5 23 11 38.9 1.65
 -5 -23 11 30.48 1.87
 -5 23 11 35.79 1.44
 5 23 11 31.8 1.43
 5 23 12 1.53 0.32
 5 23 12 1.92 0.38
 -5 23 12 1.64 0.31
 5 23 13 0.72 0.23
 -5 23 13 0.34 0.26
 5 23 14 -0.31 0.24
 -5 23 14 -0.29 0.26
 -5 23 15 6.35 0.67
 5 23 15 7.26 0.68
 5 23 16 0.29 0.19
 -5 23 16 0.15 0.18
 5 23 17 0.13 0.12
 5 25 0 310.37 4.1
 -5 25 0 320.19 4.24
 -5 25 -1 22.43 1.22
 5 25 1 21.15 1.15
 5 25 -1 20.5 1.13
 -5 25 1 23.99 1.23
 -5 25 -2 60.41 1.87
 -5 -25 -2 66.06 1.93
 -5 25 2 65.17 1.97
 5 25 -2 63.39 1.86
 5 25 2 59.01 1.84
 5 25 -3 0.74 0.23
 5 25 3 0.81 0.26
 -5 -25 -3 0.83 0.23
 -5 25 3 0.75 0.28
 -5 -25 3 1.03 0.27
 -5 25 4 9.72 0.8
 -5 -25 4 8.9 0.87
 5 25 -4 9.08 0.74
 -5 -25 -4 7.76 0.67
 5 25 4 8.14 0.71
 -5 25 5 3.96 0.51
 -5 -25 -5 3.19 0.47
 5 25 5 3.43 0.46
 -5 -25 5 3.81 0.58
 5 25 -5 3.64 0.5
 -5 25 6 10.53 0.75
 -5 -25 -6 10.72 0.86
 5 25 6 10.49 0.83
 -5 25 6 11.19 0.87
 -5 -25 6 11.05 1.02
 -5 25 7 0.06 0.16
 -5 25 7 0.47 0.26
 5 25 7 -0.02 0.19
 -5 -25 7 0.07 0.18
 -5 -25 8 11.61 1.12
 5 25 8 15.06 1
 -5 25 8 13.8 0.9
 5 25 9 59.82 2
 -5 25 9 61.87 1.9
 5 25 10 14.22 0.98
 5 25 10 14.62 1.04
 -5 25 10 16.62 1.03
 5 25 11 26.1 1.32
 -5 25 11 25.16 1.26
 5 25 11 24.24 1.25
 -5 25 12 3.38 0.47
 5 25 12 2.64 0.43
 5 25 12 3.59 0.51
 -5 25 13 4.84 0.55
 5 25 13 5.69 0.64
 5 25 14 -0.37 0.22
 -5 25 14 -0.23 0.24
 5 25 15 0.09 0.13
 -5 25 15 0.15 0.16
 5 25 16 0.21 0.14
 -5 25 16 0.12 0.14
 -5 27 0 133.66 2.9
 5 27 0 136.26 2.81
 -5 27 -1 45.47 1.77
 -5 27 1 44.03 1.79
 5 27 -1 44.87 1.62
 5 27 1 42.56 1.63
 -5 27 -2 37.26 1.57
 -5 27 2 38.43 1.59
 5 27 -2 38.26 1.51
 -5 -27 -2 36.56 1.53
 5 27 2 36.51 1.48
 -5 27 3 2.27 0.44
 5 27 3 2.19 0.39
 5 27 -3 2.08 0.38
 -5 -27 -3 1.16 0.29
 -5 27 4 -0.03 0.21
 5 27 -4 -0.15 0.2
 5 27 4 -0.2 0.27
 -5 -27 -4 -0.02 0.15
 -5 27 5 5 0.59
 5 27 5 5.04 0.62
 -5 -27 -5 3.7 0.51
 5 27 -5 5.4 0.6
 -5 27 6 4.19 0.48
 5 27 6 4.55 0.61
 -5 27 6 4.74 0.59
 -5 27 7 -0.03 0.24
 -5 27 7 0.35 0.22
 5 27 7 0.72 0.3
 -5 27 8 18.52 1.06
 5 27 8 19.36 1.18
 5 27 9 75.24 2.25
 -5 27 9 72.23 2.13
 5 27 10 16.41 1.05
 -5 27 10 17.63 1.09
 -5 27 11 22.72 1.19
 5 27 11 20.46 1.16
 5 27 12 4.66 0.57
 -5 27 12 4.52 0.55
 -5 27 13 5.68 0.6
 -5 27 14 0.25 0.15
 -5 27 15 0.54 0.22
 -5 27 16 -0.16 0.17
 -5 29 0 65.53 2.15
 5 29 0 65.6 2.06
 -5 29 -1 25.52 1.38
 -5 29 1 24.81 1.38
 5 29 1 24.68 1.24
 5 29 -1 23.8 1.27
 -5 29 2 16.61 1.12
 5 29 2 14.49 0.96
 -5 29 -2 14.59 1.05
 5 29 -2 14.22 0.96
 -5 29 3 0.15 0.24
 5 29 -3 0.12 0.2
 5 29 3 0.23 0.21
 -5 29 4 1.42 0.38
 5 29 -4 1.62 0.35
 5 29 4 1.69 0.36
 5 29 5 3.42 0.51
 5 29 -5 3.61 0.52
 -5 29 5 3.32 0.52
 -5 29 6 5.7 0.59
 -5 29 6 5.38 0.68
 5 29 6 5.77 0.65
 -5 29 7 0.95 0.33
 5 29 7 1.65 0.39
 -5 29 7 0.81 0.19
 -5 29 8 2.65 0.42
 5 29 8 3.31 0.51
 5 29 9 21.21 1.25
 -5 29 9 20.96 1.17
 5 29 10 13.92 1.01
 -5 29 10 15.13 1.01
 -5 29 11 30.83 1.4
 5 29 11 29.11 1.39
 -5 29 12 4.69 0.54
 5 29 12 4.24 0.52
 -5 29 13 0 0.19
 -5 29 14 0.13 0.16
 -5 29 15 2.86 0.41
 -5 29 16 0.7 0.21
 -5 31 0 14.57 1.06
 5 31 0 15.11 1.01
 -5 31 -1 8.83 0.88
 -5 31 1 10.29 0.93
 5 31 1 9.24 0.82
 5 31 -1 10.04 0.83
 5 31 -2 0.98 0.32
 -5 31 2 0.91 0.33
 5 31 2 1.07 0.32
 5 31 3 0.61 0.24
 5 31 -3 0.82 0.35
 -5 31 3 0.83 0.33
 -5 31 4 2.81 0.53
 5 31 4 2.97 0.49
 5 31 -4 3.14 0.49
 -5 31 5 12.26 0.89
 -5 31 5 13.4 1.07
 5 31 5 15.36 1.03
 5 31 -5 14.75 1.05
 5 31 6 6.95 0.73
 -5 31 6 6.98 0.75
 -5 31 6 7.65 0.71
 -5 31 7 4.2 0.59
 5 31 7 4.1 0.57
 -5 31 7 4.25 0.55
 5 31 8 0.34 0.26
 -5 31 8 0.31 0.26
 5 31 9 4.65 0.57
 -5 31 9 4.29 0.53
 5 31 10 12.85 0.94
 -5 31 10 11.73 0.89
 5 31 10 10.62 0.87
 -5 31 11 13.69 0.94
 5 31 11 13.66 0.95
 5 31 12 0.61 0.23
 -5 31 12 0.66 0.24
 -5 31 13 0.71 0.25
 -5 31 14 3.44 0.47
 -5 31 15 6.5 0.59
 5 33 0 0.31 0.23
 -5 33 0 0.44 0.29
 5 33 -1 1 0.33
 5 33 1 0.89 0.31
 -5 33 1 0.67 0.27
 -5 33 2 0.79 0.36
 5 33 -2 1.1 0.35
 5 33 2 0.45 0.26
 5 33 -3 5.37 0.66
 5 33 3 4.16 0.57
 -5 33 3 4.05 0.63
 -5 33 4 12.13 1.05
 5 33 -4 11.27 0.94
 5 33 4 10.46 0.87
 5 33 -5 29.69 1.51
 5 33 5 27.79 1.43
 -5 33 5 27.95 1.52
 5 33 6 32.35 1.56
 -5 33 6 30.49 1.62
 -5 33 6 35.51 1.53
 5 33 7 23.42 1.34
 -5 33 7 22.94 1.24
 5 33 8 3.68 0.57
 -5 33 8 4.74 0.57
 5 33 9 3.37 0.51
 5 33 9 2.87 0.47
 -5 33 9 3.42 0.49
 5 33 10 3.85 0.52
 -5 33 10 3.8 0.51
 5 33 10 3.42 0.51
 5 33 11 0.86 0.29
 -5 33 11 0.09 0.18
 -5 33 12 -0.24 0.2
 5 33 12 -0.27 0.19
 -5 33 13 2.57 0.4
 -5 33 14 7.2 0.62
 -5 35 0 3.74 0.59
 5 35 0 4.78 0.64
 5 35 -1 1.85 0.42
 5 35 1 1.7 0.4
 -5 35 1 1.07 0.39
 -5 35 2 0.14 0.36
 5 35 -2 0.09 0.23
 5 35 2 0.26 0.27
 5 35 -3 11.94 0.98
 -5 35 3 10.78 1.06
 5 35 3 10.18 0.85
 -5 35 4 13.6 1.11
 5 35 -4 11.14 0.96
 -5 35 4 14.24 0.98
 5 35 4 12.52 0.97
 -5 35 5 51.51 1.87
 5 35 -5 57.5 2.09
 5 35 5 57.77 2.07
 -5 35 5 57.62 2.22
 5 35 6 34.37 1.6
 -5 35 6 36.28 1.58
 5 35 7 26.49 1.44
 -5 35 7 23.66 1.3
 -5 35 8 2.21 0.41
 5 35 8 2.24 0.43
 -5 35 9 0.02 0.2
 5 35 9 0.16 0.18
 5 35 9 0.05 0.21
 5 35 10 0.72 0.26
 5 35 10 1.09 0.28
 -5 35 10 0.92 0.29
 5 35 11 0.03 0.17
 -5 35 11 -0.21 0.21
 -5 35 12 0.62 0.22
 5 35 12 0.13 0.15
 -5 35 13 1.4 0.3
 -5 35 14 8.36 0.63
 5 37 0 3.4 0.56
 5 37 -1 3.98 0.58
 5 37 1 4.04 0.58
 5 37 2 0.36 0.24
 5 37 -2 0.15 0.27
 5 37 3 11.12 0.93
 5 37 -3 12.29 1.01
 -5 37 4 12.95 0.96
 5 37 -4 10.5 0.96
 5 37 4 10.13 0.93
 5 37 -5 48.4 1.92
 5 37 5 47.82 1.86
 5 37 6 16.52 1.12
 -5 37 6 16.35 1.09
 5 37 7 9.21 0.84
 -5 37 7 8.43 0.81
 -5 37 8 1.24 0.32
 5 37 8 1.47 0.37
 5 37 9 0.57 0.23
 5 37 9 0.81 0.27
 -5 37 9 0.52 0.25
 5 37 10 2.33 0.38
 5 37 10 1.85 0.35
 -5 37 10 1.82 0.37
 5 37 11 -0.13 0.18
 -5 37 11 0.3 0.19
 -5 37 12 0.19 0.17
 5 37 12 -0.24 0.18
 -5 37 13 0.57 0.2
 5 39 0 4.95 0.71
 5 39 -1 31.78 1.58
 5 39 1 29.57 1.5
 5 39 -2 0.7 0.32
 5 39 2 0.49 0.29
 -5 39 3 7.79 0.71
 5 39 -3 9.57 0.9
 5 39 3 9.17 0.85
 5 39 -4 3.53 0.57
 -5 39 4 3.99 0.56
 5 39 4 2.72 0.49
 5 39 -5 12.41 0.97
 5 39 5 14.11 1.01
 -5 39 5 10.74 0.88
 5 39 6 3.65 0.57
 -5 39 6 3.5 0.53
 -5 39 7 0.53 0.26
 5 39 7 0.64 0.26
 -5 39 8 1.16 0.3
 5 39 8 0.86 0.26
 5 39 8 0.47 0.22
 5 39 9 2.78 0.43
 5 39 9 2.81 0.45
 -5 39 9 2.29 0.38
 -5 39 10 7.79 0.69
 5 39 10 7.81 0.67
 5 39 11 0.31 0.14
 -5 39 11 0.72 0.24
 -5 39 12 0.02 0.13
 5 41 0 2.93 0.61
 -5 41 1 39.73 1.59
 5 41 1 43.56 1.79
 5 41 -1 42.93 1.81
 5 41 2 0.8 0.4
 5 41 -2 0.8 0.35
 -5 41 2 1.18 0.34
 5 41 3 0.54 0.27
 -5 41 3 0.54 0.23
 5 41 -3 0.59 0.22
 -5 41 4 0.87 0.25
 5 41 -4 0.71 0.28
 5 41 4 1.14 0.36
 5 41 -5 3.15 0.5
 5 41 5 3.52 0.51
 -5 41 5 3.57 0.52
 -5 41 6 -0.08 0.19
 5 41 6 -0.62 0.36
 -5 41 7 0.87 0.26
 5 41 7 0.34 0.18
 5 41 8 8.57 0.75
 5 41 8 8.84 0.73
 -5 41 8 7.97 0.69
 -5 41 9 6.69 0.63
 5 41 9 6.33 0.6
 5 41 9 7.37 0.64
 -5 41 10 15.31 0.89
 5 41 10 11.94 0.76
 5 43 0 3.7 0.59
 5 43 -1 36.6 1.58
 5 43 1 37 1.57
 5 43 -2 2.22 0.45
 5 43 2 2.48 0.48
 -5 43 2 2.33 0.42
 5 43 -3 2.69 0.43
 5 43 3 2.71 0.45
 -5 43 3 2.82 0.44
 -5 43 4 0.16 0.17
 5 43 -4 0.14 0.19
 5 43 4 0.03 0.19
 -5 43 5 0.46 0.2
 5 43 5 0.29 0.19
 -5 43 6 0.03 0.17
 5 43 6 -0.15 0.23
 5 43 7 3.18 0.46
 5 43 7 2.48 0.39
 -5 43 7 2.38 0.39
 5 43 8 9.48 0.72
 -5 43 8 11 0.77
 5 43 8 12.07 0.8
 -5 43 9 8.73 0.66
 5 45 0 6.55 0.69
 5 45 -1 27.09 1.3
 5 45 1 25.96 1.27
 5 45 2 1.37 0.36
 5 45 -2 1.55 0.37
 5 45 -3 0.55 0.27
 5 45 3 0.6 0.2
 -5 45 3 0.6 0.22
 -5 45 4 -0.18 0.19
 5 45 -4 -0.04 0.15
 5 45 4 -0.24 0.23
 -5 45 5 0.54 0.2
 5 45 5 0.52 0.21
 5 45 6 -0.03 0.16
 5 45 6 0.05 0.18
 -5 45 6 -0.07 0.15
 5 45 7 0.4 0.19
 5 47 0 4.06 0.49
 5 47 -1 9.97 0.75
 5 47 1 10.3 0.74
 5 47 -2 0.66 0.23
 5 47 2 0.53 0.21
 5 47 -3 0.08 0.16
 5 47 3 -0.1 0.17
 5 47 4 0.47 0.18
 -6 0 0 87.89 1.17
 -6 0 1 16.62 0.53
 -6 0 2 48.74 0.96
 -6 0 3 72.8 1.24
 -6 0 4 285.48 2.67
 -6 0 5 31.52 0.96
 -6 0 6 86.36 1.66
 -6 0 7 33.68 1.13
 -6 0 8 2.68 0.35
 -6 0 8 3.99 0.49
 -6 0 8 3.95 0.45
 -6 0 9 7.66 0.61
 -6 0 9 6.95 0.62
 -6 0 9 6.27 0.59
 -6 0 10 1.36 0.27
 -6 0 10 1.32 0.32
 6 0 11 1.66 0.33
 -6 0 11 2.14 0.4
 6 0 12 -0.1 0.18
 -6 0 12 0.08 0.17
 6 0 13 7.23 0.69
 -6 0 13 8.2 0.8
 6 0 14 0.28 0.23
 -6 0 14 0.85 0.41
 6 0 15 37.7 1.56
 6 0 16 1.51 0.4
 6 0 17 7.24 0.67
 6 0 18 0.02 0.14
 6 0 19 0.08 0.11
 -6 2 0 176.56 1.61
 -6 -2 0 174.28 1.71
 -6 -2 1 7.49 0.37
 -6 2 1 7.05 0.34
 -6 2 2 1.18 0.16
 -6 -2 2 1.37 0.18
 -6 2 3 1.98 0.22
 -6 -2 3 2.09 0.25
 -6 -2 4 103.24 1.65
 -6 2 4 100.79 1.54
 -6 2 5 27.47 0.86
 -6 -2 5 26.68 0.89
 -6 -2 6 31.27 0.99
 -6 2 6 31.79 1
 -6 2 7 36.92 1.16
 -6 -2 7 37.71 1.19
 -6 2 8 3.28 0.43
 -6 2 8 2.9 0.37
 -6 -2 8 3.19 0.38
 -6 -2 8 2.84 0.4
 -6 2 8 3.14 0.36
 -6 2 9 3.64 0.45
 -6 2 9 4.85 0.48
 -6 -2 9 3.7 0.45
 -6 -2 9 4.94 0.47
 -6 2 9 3.63 0.45
 6 -2 10 3.55 0.46
 -6 2 10 2.46 0.38
 -6 2 10 3.33 0.47
 -6 -2 10 2.57 0.38
 -6 -2 10 3.88 0.51
 -6 2 10 3.39 0.47
 6 -2 11 2.98 0.44
 6 2 11 2.44 0.39
 -6 -2 11 3.82 0.47
 -6 2 11 2.98 0.46
 -6 -2 11 2.98 0.48
 -6 2 11 3.49 0.48
 -6 -2 12 0.3 0.22
 6 -2 12 0.1 0.18
 6 2 12 -0.09 0.22
 -6 2 12 0.35 0.25
 6 -2 13 6.95 0.69
 6 2 13 6.61 0.66
 -6 2 13 7.78 0.79
 -6 -2 13 7.74 0.79
 6 -2 14 0.92 0.3
 6 2 14 0.6 0.25
 -6 2 14 1.02 0.41
 6 2 15 30.31 1.4
 6 -2 15 29.42 1.4
 6 -2 16 2.72 0.46
 6 2 16 2.93 0.5
 6 -2 17 9.3 0.78
 6 2 17 9.28 0.76
 6 -2 18 0.05 0.15
 6 2 18 0 0.12
 6 2 19 0.12 0.11
 6 -2 19 0.26 0.16
 -6 4 0 153.34 1.46
 -6 -4 0 146.39 1.62
 -6 4 -1 3.96 0.25
 -6 -4 1 4.45 0.3
 -6 4 1 4.04 0.25
 -6 -4 2 2.42 0.24
 -6 4 2 1.93 0.19
 -6 4 3 1.01 0.16
 -6 -4 3 1.17 0.19
 -6 4 4 0.38 0.11
 -6 -4 4 0.32 0.12
 -6 -4 5 39.86 1.12
 -6 4 5 42.92 1.08
 -6 4 6 54.27 1.31
 -6 -4 6 53.93 1.35
 -6 -4 7 0.35 0.16
 -6 4 7 0.09 0.16
 -6 4 7 0.45 0.15
 -6 -4 8 8.88 0.65
 -6 4 8 8.96 0.64
 -6 4 8 9.31 0.62
 -6 -4 8 8.73 0.67
 -6 4 8 7.38 0.58
 -6 4 9 42.04 1.48
 -6 -4 9 44.28 1.46
 -6 4 9 38.01 1.38
 -6 -4 9 39.65 1.45
 -6 4 9 47.43 1.47
 -6 -4 10 15.56 0.91
 6 -4 10 18.27 1.02
 -6 4 10 17.82 1
 -6 -4 10 19.21 1.1
 -6 4 10 15.41 0.97
 6 -4 11 18.98 1.07
 6 4 11 18.21 1.01
 -6 4 11 18.39 1.12
 -6 -4 11 20.21 1.17
 -6 4 11 19.41 1.1
 -6 -4 11 20.97 1.11
 6 -4 12 0.21 0.21
 -6 4 12 0.24 0.28
 6 4 12 0.17 0.15
 -6 -4 12 0.64 0.32
 -6 4 12 0.3 0.24
 6 -4 13 1.2 0.3
 6 4 13 1.22 0.32
 -6 4 13 1.36 0.39
 6 -4 14 1 0.29
 6 4 14 0.93 0.3
 -6 4 14 0.81 0.3
 6 4 15 20.6 1.17
 -6 4 15 20.7 1.27
 6 -4 15 19.32 1.11
 6 -4 16 3.07 0.48
 6 4 16 4.41 0.58
 6 -4 17 0.85 0.27
 6 4 17 0.68 0.24
 6 4 18 0.13 0.13
 6 -4 18 0.28 0.2
 6 -4 19 2.89 0.39
 6 4 19 2.91 0.39
 -6 -6 0 147.55 1.68
 -6 6 0 144.77 1.32
 -6 6 -1 17.28 0.46
 -6 -6 1 17.3 0.6
 -6 6 1 18.38 0.5
 -6 -6 2 0.54 0.14
 -6 6 2 0.73 0.13
 -6 -6 3 0.53 0.14
 -6 6 3 0.58 0.13
 -6 6 4 0.24 0.11
 -6 -6 4 0.27 0.12
 -6 -6 5 1.86 0.27
 -6 6 5 1.85 0.24
 -6 -6 6 12.53 0.68
 -6 6 6 13.29 0.66
 -6 6 7 1.3 0.23
 -6 -6 7 1.44 0.28
 -6 6 7 0.9 0.21
 -6 -6 8 44.03 1.41
 -6 6 8 46.36 1.43
 -6 6 8 39.99 1.34
 -6 6 8 42.23 1.34
 -6 6 9 67.22 1.83
 -6 -6 9 68.56 1.86
 -6 6 9 66.59 1.79
 -6 6 10 27.83 1.26
 -6 -6 10 25.6 1.21
 6 -6 11 35.22 1.46
 6 6 11 36.18 1.43
 -6 6 11 38.4 1.56
 -6 -6 11 37.44 1.53
 -6 6 11 38.85 1.53
 6 -6 12 6.76 0.67
 6 6 12 5.04 0.59
 -6 6 12 6.77 0.72
 -6 -6 12 4.87 0.58
 -6 6 12 5.6 0.64
 6 -6 13 1.38 0.34
 6 6 13 0.99 0.26
 -6 6 13 2.13 0.5
 -6 6 13 1.19 0.38
 6 6 14 0.95 0.3
 6 -6 14 0.89 0.27
 -6 6 14 0.43 0.21
 6 6 15 24.45 1.28
 -6 6 15 26.03 1.41
 6 -6 15 22.04 1.21
 6 -6 16 0.53 0.22
 6 6 16 0.99 0.26
 6 -6 17 -0.01 0.14
 6 6 17 0.11 0.16
 6 6 18 2.06 0.36
 6 -6 18 1.75 0.33
 6 -6 19 6.31 0.56
 6 6 19 7.2 0.59
 -6 -8 0 137.75 1.68
 -6 8 0 137.8 1.19
 -6 -8 1 54.01 1.08
 -6 -8 -1 52.91 1.08
 -6 8 -1 53.21 0.74
 -6 -8 2 20.36 0.72
 -6 8 2 22.05 0.6
 -6 -8 3 1.21 0.2
 -6 8 3 1.37 0.17
 -6 8 4 6.53 0.39
 -6 -8 4 6.06 0.43
 -6 8 5 1.21 0.2
 -6 -8 5 1.22 0.24
 -6 -8 6 0.13 0.13
 -6 8 6 0.16 0.11
 -6 8 7 1.59 0.25
 -6 8 7 0.89 0.18
 -6 8 7 0.92 0.21
 -6 -8 7 1.4 0.25
 -6 -8 8 15.62 0.88
 6 8 8 18 1.09
 -6 8 8 16.81 0.89
 -6 8 8 14.92 0.84
 6 -8 9 90.26 2.22
 -6 -8 9 107.31 2.38
 -6 8 9 111.02 2.32
 -6 8 9 115.86 2.37
 6 8 9 93.94 2.55
 -6 8 10 44.31 1.57
 -6 -8 10 44.31 1.6
 -6 8 10 48.47 1.63
 6 -8 11 61.19 1.96
 6 8 11 66.23 1.97
 -6 -8 11 63.46 2.02
 -6 8 11 67.8 2.05
 -6 8 11 63.8 1.98
 6 -8 12 15.33 1.02
 6 8 12 13.74 0.96
 -6 8 12 14.11 1.07
 -6 -8 12 12.32 0.95
 -6 8 12 14.57 1.01
 6 -8 13 3.26 0.49
 -6 8 13 4.21 0.64
 -6 8 13 3.08 0.52
 6 8 13 3.11 0.48
 6 8 14 5.36 0.61
 -6 8 14 5.91 0.68
 6 -8 14 5.29 0.59
 6 -8 15 1.6 0.34
 6 8 15 2.02 0.37
 -6 8 15 2.28 0.44
 6 -8 16 0.3 0.17
 6 8 16 0 0.24
 6 8 17 0.91 0.29
 6 -8 17 0.64 0.2
 6 8 18 5.43 0.56
 6 8 19 8.4 0.64
 -6 -10 0 143.86 1.77
 -6 10 0 130.96 1.03
 -6 -10 -1 81.34 1.38
 -6 -10 1 79.22 1.38
 -6 10 1 70.82 0.84
 -6 10 -2 32.97 0.6
 -6 -10 2 34.35 0.96
 -6 10 3 4.49 0.29
 -6 -10 3 4.62 0.38
 -6 10 4 4.33 0.31
 -6 -10 4 4.18 0.38
 -6 -10 5 14.56 0.74
 -6 10 5 13.83 0.61
 -6 -10 6 24.97 1.02
 -6 10 6 21.74 0.92
 6 10 7 1.12 0.29
 -6 -10 7 0.82 0.18
 -6 10 7 1.14 0.23
 -6 10 7 1.03 0.22
 -6 10 8 14.12 0.81
 6 10 8 13.63 0.97
 -6 10 8 12.42 0.75
 -6 -10 8 14.38 0.86
 -6 10 9 51.58 1.6
 6 10 9 46.34 1.79
 -6 -10 9 50.36 1.67
 -6 10 9 52.24 1.64
 6 -10 10 74.92 2.08
 -6 -10 10 70.12 2.07
 -6 10 10 72.05 1.99
 6 10 11 60.82 1.94
 -6 10 11 56.44 1.86
 -6 -10 11 57.11 1.98
 -6 10 11 57.24 1.85
 6 -10 12 10.63 0.83
 6 10 12 9.36 0.83
 -6 -10 12 9.68 0.85
 -6 10 12 10.66 0.9
 -6 10 12 10.44 0.85
 6 -10 13 0.45 0.22
 -6 10 13 0.88 0.36
 6 10 13 0.28 0.18
 -6 10 13 0.71 0.3
 6 -10 14 -0.1 0.18
 6 10 14 -0.09 0.23
 -6 10 14 0.04 0.19
 6 -10 15 0.6 0.23
 6 10 15 0.45 0.21
 -6 10 15 0.68 0.31
 6 10 16 0.57 0.21
 6 10 17 0.41 0.22
 6 10 18 5.18 0.54
 6 10 19 4.28 0.46
 -6 -12 0 150.04 1.91
 -6 -12 -1 83.22 1.46
 -6 -12 1 79.5 1.44
 -6 -12 2 24.72 0.85
 -6 -12 3 1.28 0.2
 -6 -12 4 12.56 0.67
 -6 -12 5 101.93 2.02
 -6 -12 6 66.26 1.7
 -6 12 6 63.85 1.56
 6 12 7 6.01 0.66
 -6 12 7 6.38 0.54
 -6 -12 7 5.98 0.53
 -6 12 7 5.36 0.48
 -6 12 8 2.98 0.39
 6 12 8 2.53 0.43
 -6 12 8 2.34 0.37
 -6 -12 8 2.73 0.39
 6 12 9 34.07 1.52
 -6 -12 9 34.24 1.43
 -6 12 9 36.15 1.36
 -6 12 9 39.26 1.4
 -6 12 10 53.05 1.7
 -6 -12 10 49.39 1.79
 -6 12 10 47.49 1.64
 -6 12 11 25.79 1.26
 -6 -12 11 25.69 1.37
 -6 12 11 27.49 1.32
 6 12 12 0.06 0.18
 -6 12 12 0.13 0.21
 -6 -12 12 0.26 0.22
 -6 12 12 0.06 0.2
 -6 12 13 1.01 0.38
 6 12 13 1.06 0.33
 -6 12 13 0.98 0.33
 -6 12 14 1.53 0.4
 6 12 14 1 0.29
 -6 12 14 1.61 0.42
 6 12 15 2.4 0.41
 -6 12 15 2.36 0.48
 6 12 16 3.89 0.53
 6 12 17 0.19 0.18
 6 12 18 1.62 0.33
 6 12 19 1.35 0.28
 -6 -14 0 53.43 1.21
 -6 -14 -1 51.63 1.19
 -6 -14 1 48.48 1.17
 -6 -14 2 0.05 0.1
 -6 -14 -2 -0.17 0.13
 -6 -14 3 33.92 1.08
 -6 -14 4 68.18 1.61
 -6 -14 5 110.45 2.19
 6 14 5 113.74 2.53
 -6 14 5 109.72 2.03
 -6 -14 6 60.78 1.69
 -6 14 6 60.73 1.57
 6 14 7 23.15 1.24
 -6 -14 7 21.88 1.06
 -6 14 7 22.4 1.02
 -6 -14 8 -0.19 0.18
 6 14 8 -0.43 0.29
 -6 14 8 0.29 0.19
 -6 14 8 0.07 0.17
 -6 -14 9 15.08 0.99
 6 14 9 15.1 1.04
 -6 14 9 17.25 0.95
 -6 14 9 17.41 0.96
 -6 14 10 13.01 0.86
 -6 -14 10 15.01 1.02
 -6 14 10 12.79 0.87
 6 14 11 0.91 0.33
 -6 14 11 0.5 0.21
 -6 14 11 0.72 0.26
 -6 -14 11 1.14 0.31
 6 14 12 0.55 0.27
 -6 14 12 0.41 0.23
 -6 -14 12 0.45 0.22
 -6 14 12 0.42 0.25
 6 14 13 0.39 0.24
 -6 14 13 0.78 0.32
 -6 14 13 0.37 0.23
 6 14 14 13.74 1.02
 -6 14 14 13.79 0.99
 -6 14 14 12.87 1
 6 14 15 8.4 0.79
 -6 14 15 8.55 0.81
 6 14 16 13.22 0.96
 6 14 17 1.55 0.34
 6 14 18 0.06 0.13
 6 14 19 0.32 0.17
 -6 -16 0 27.72 0.94
 -6 -16 -1 4.47 0.38
 -6 -16 1 3.87 0.36
 -6 -16 2 2.13 0.29
 -6 -16 -2 2.69 0.31
 6 16 3 145.39 2.65
 -6 -16 3 139.88 2.31
 -6 -16 4 48.46 1.43
 -6 16 4 45.64 1.29
 -6 -16 5 123.93 2.45
 -6 16 5 126.25 2.25
 -6 16 6 73.98 1.77
 -6 -16 6 73.73 1.98
 6 16 7 31.17 1.44
 -6 -16 7 29.14 1.28
 -6 16 7 31.12 1.2
 -6 -16 8 2.27 0.39
 6 16 8 1.87 0.38
 -6 16 8 2.26 0.38
 -6 16 8 1.15 0.29
 6 16 9 3.7 0.52
 -6 16 9 3.53 0.46
 -6 -16 9 3.22 0.48
 -6 16 9 2.8 0.41
 6 16 10 2.94 0.5
 6 16 10 2.38 0.4
 -6 -16 10 2.79 0.46
 -6 16 10 2.88 0.43
 -6 16 10 2.17 0.33
 -6 -16 11 1.08 0.32
 6 16 11 1.25 0.37
 -6 16 11 0.76 0.18
 -6 16 11 1.54 0.37
 -6 -16 12 3.48 0.56
 6 16 12 4.58 0.62
 -6 16 12 3.43 0.47
 -6 16 12 4.73 0.59
 -6 16 13 3.76 0.58
 6 16 13 3.53 0.57
 -6 16 13 3.05 0.5
 6 16 14 49.52 1.89
 -6 16 14 43.51 1.75
 -6 16 15 8.26 0.83
 6 16 15 8.64 0.82
 -6 16 16 27.11 1.31
 6 16 16 32.68 1.47
 6 16 17 2.39 0.41
 6 16 18 0.36 0.16
 -6 18 0 1.28 0.32
 6 18 0 1.45 0.3
 -6 -18 0 1.19 0.22
 -6 18 1 1.47 0.33
 -6 -18 -1 1.37 0.22
 6 18 -1 1.48 0.27
 6 18 1 1.73 0.31
 -6 -18 1 1.42 0.23
 6 18 2 3.82 0.5
 -6 -18 -2 5.11 0.45
 -6 -18 2 4.69 0.44
 -6 18 2 3.76 0.48
 -6 18 3 84.07 2.04
 -6 -18 -3 86.91 1.95
 6 18 3 87.39 2.06
 -6 -18 3 80.97 1.88
 -6 18 4 34.87 1.17
 -6 18 4 27.62 1.22
 6 18 4 28.99 1.24
 -6 -18 4 36.88 1.33
 -6 -18 5 120.71 2.54
 6 18 5 121.82 2.62
 -6 18 5 117.25 2.24
 -6 -18 6 74.68 2.1
 -6 18 6 71.93 1.79
 -6 -18 7 38.83 1.55
 -6 18 7 40.48 1.43
 -6 18 8 1.36 0.31
 6 18 8 1.3 0.34
 -6 -18 8 1.33 0.32
 -6 -18 9 1.33 0.35
 6 18 9 1.03 0.29
 -6 18 9 0.9 0.25
 -6 18 9 1.24 0.31
 6 18 10 6.64 0.73
 6 18 10 5.43 0.59
 -6 18 10 6.5 0.63
 -6 18 10 5.58 0.62
 -6 -18 10 6.14 0.73
 -6 -18 11 0.18 0.15
 -6 18 11 0.13 0.18
 6 18 11 0.27 0.23
 6 18 12 5.04 0.63
 -6 -18 12 4.16 0.65
 -6 18 12 3.08 0.48
 -6 18 12 5.08 0.61
 6 18 13 2.77 0.48
 -6 18 13 1.73 0.42
 6 18 14 37.04 1.68
 -6 18 14 34.97 1.54
 -6 18 15 6.26 0.74
 6 18 15 6.31 0.73
 -6 18 16 31.61 1.38
 6 18 16 37.12 1.55
 6 18 17 2.19 0.39
 6 18 18 0.92 0.24
 -6 20 0 0.24 0.18
 6 20 0 0.42 0.19
 -6 -20 1 1.36 0.25
 -6 20 1 0.84 0.27
 6 20 -1 1.43 0.28
 6 20 1 1.02 0.25
 -6 -20 -1 1.46 0.26
 6 20 2 0.18 0.19
 -6 20 2 0.39 0.23
 6 20 -2 0.14 0.19
 -6 -20 -2 0.1 0.11
 -6 -20 2 0.1 0.13
 6 20 -3 35.91 1.34
 6 20 3 36.13 1.38
 -6 -20 -3 39.21 1.37
 -6 -20 3 38.37 1.4
 -6 -20 4 25.82 1.19
 -6 20 4 23.78 1.01
 -6 20 4 21.66 1.16
 6 20 4 20.53 1.07
 6 20 -4 19.67 0.98
 -6 20 5 90.05 2.24
 -6 -20 5 95.18 2.41
 6 20 5 98.03 2.32
 -6 20 5 98.43 2.07
 6 20 6 35.81 1.44
 -6 -20 6 37.51 1.58
 -6 20 6 35.13 1.29
 6 20 7 28.33 1.35
 -6 -20 7 26.77 1.38
 -6 20 7 28.06 1.19
 -6 20 8 1.21 0.29
 6 20 8 1.02 0.31
 -6 -20 8 1.5 0.36
 6 20 9 5.16 0.62
 6 20 9 5.04 0.58
 -6 -20 9 4.17 0.6
 -6 20 9 4.39 0.53
 6 20 10 12.55 0.98
 6 20 10 11.98 0.88
 -6 20 10 11.78 0.84
 -6 -20 10 12.67 1.09
 6 20 11 0.04 0.18
 -6 -20 11 0.07 0.22
 6 20 12 2.21 0.45
 -6 20 12 0.8 0.23
 6 20 13 -0.07 0.2
 -6 20 13 -0.25 0.27
 6 20 14 37.78 1.65
 -6 20 14 31.97 1.47
 -6 20 15 2.2 0.48
 6 20 15 2.02 0.49
 -6 20 16 25.9 1.22
 6 20 16 29.53 1.35
 6 20 17 1.21 0.29
 6 20 18 -0.31 0.19
 -6 22 0 1.58 0.39
 -6 -22 0 1.23 0.31
 6 22 0 0.92 0.33
 -6 22 1 88.81 2.23
 6 22 -1 91.11 2.13
 -6 -22 -1 89.36 2.06
 -6 -22 1 87.82 2.08
 6 22 1 83.58 2.07
 6 22 -2 0.21 0.2
 6 22 2 0.06 0.16
 -6 -22 -2 0.08 0.13
 -6 -22 2 -0.29 0.23
 -6 22 3 11.48 0.85
 6 22 -3 11.38 0.79
 6 22 3 11.68 0.76
 -6 -22 -3 11.16 0.77
 -6 -22 3 11.76 0.81
 -6 -22 -4 12.4 0.84
 -6 -22 4 12.35 0.89
 -6 22 4 11.37 0.72
 -6 22 4 12.16 0.9
 6 22 -4 11.05 0.77
 6 22 4 11.73 0.81
 -6 22 5 68.09 1.8
 -6 22 5 71.22 2.08
 6 22 5 67.31 1.94
 -6 -22 5 69.38 2.17
 6 22 6 15.67 0.96
 -6 -22 6 16.76 1.12
 -6 22 6 15.18 0.89
 6 22 7 4.1 0.54
 -6 -22 7 3.34 0.53
 -6 22 7 3.99 0.49
 -6 22 8 1.62 0.35
 -6 -22 8 1.48 0.39
 6 22 8 1.88 0.39
 6 22 9 4.47 0.59
 -6 -22 9 3.57 0.6
 6 22 9 3.93 0.53
 -6 22 9 3.57 0.5
 6 22 10 38.17 1.67
 6 22 10 35 1.5
 -6 22 10 34.63 1.42
 -6 -22 10 33.29 1.83
 6 22 10 31.86 1.4
 6 22 11 4.72 0.63
 -6 22 11 3.66 0.49
 6 22 12 8.56 0.81
 -6 22 12 7.76 0.72
 6 22 13 -0.04 0.22
 -6 22 13 -0.65 0.32
 -6 22 14 4.08 0.53
 6 22 14 4.24 0.57
 6 22 15 0.66 0.27
 -6 22 15 0.76 0.34
 -6 22 16 9.31 0.74
 6 22 16 9.99 0.79
 6 22 17 0.1 0.12
 -6 24 0 33.81 1.47
 6 24 0 27.39 1.32
 -6 24 1 145.44 2.96
 6 24 1 142.62 2.73
 6 24 -1 152.48 2.88
 -6 -24 -1 145.79 2.79
 -6 -24 1 150.17 2.98
 6 24 2 3.29 0.48
 -6 24 2 4.11 0.56
 -6 -24 -2 1.9 0.37
 6 24 -2 3.32 0.48
 -6 24 3 0.49 0.25
 6 24 3 0.92 0.25
 -6 -24 -3 0.77 0.2
 -6 -24 3 1.04 0.29
 6 24 -3 0.58 0.21
 -6 -24 4 4.73 0.6
 6 24 -4 5.16 0.55
 -6 24 4 5.43 0.65
 6 24 4 5.94 0.59
 -6 -24 -4 5.07 0.55
 -6 24 5 20.1 1.01
 -6 24 5 22.72 1.23
 -6 -24 -5 20.84 1.16
 6 24 5 20.54 1.11
 -6 -24 5 22.11 1.34
 -6 24 6 10 0.83
 6 24 6 12.81 0.89
 -6 -24 6 12.57 1.03
 -6 24 6 10.97 0.78
 6 24 7 4.02 0.55
 -6 24 7 4.13 0.51
 -6 -24 7 4.15 0.64
 6 24 8 11.69 0.9
 -6 -24 8 12.79 1.12
 6 24 8 12.29 0.92
 -6 24 8 12.11 0.88
 6 24 9 12.1 0.93
 6 24 9 12.59 0.96
 -6 -24 9 9.49 1.01
 -6 24 9 12.45 0.87
 6 24 10 45.01 1.7
 6 24 10 47.89 1.8
 -6 -24 10 43.14 2.22
 -6 24 10 47.04 1.68
 6 24 11 11.49 0.95
 -6 24 11 10.78 0.86
 6 24 12 7.15 0.73
 -6 24 12 7.14 0.67
 6 24 13 0.31 0.19
 -6 24 13 0.05 0.26
 6 24 14 0.15 0.16
 -6 24 14 0.3 0.16
 6 24 15 0.32 0.16
 -6 24 15 0.29 0.2
 -6 24 16 1.78 0.32
 6 24 16 2.25 0.36
 -6 26 0 40.88 1.66
 6 26 0 34.66 1.51
 -6 26 1 153.62 3.16
 6 26 -1 147.25 2.96
 6 26 1 147.24 2.89
 -6 -26 -1 155.23 3.13
 -6 26 2 10.8 0.95
 6 26 -2 10.13 0.79
 6 26 2 10.08 0.81
 -6 -26 -2 5.41 0.58
 -6 -26 2 6.77 0.73
 6 26 3 2.16 0.39
 -6 -26 -3 2.06 0.37
 -6 26 3 2.06 0.45
 -6 -26 3 2.21 0.45
 6 26 -3 2.02 0.37
 -6 -26 4 1.15 0.35
 -6 26 4 0.74 0.3
 6 26 4 0.72 0.24
 6 26 -4 1.03 0.3
 -6 -26 -4 0.7 0.22
 -6 26 5 5.79 0.56
 -6 26 5 5.91 0.68
 6 26 -5 6.57 0.66
 6 26 5 6.29 0.64
 -6 -26 -5 6.19 0.65
 -6 -26 5 7.15 0.83
 6 26 6 8.22 0.74
 -6 -26 -6 6.44 0.68
 -6 -26 6 7.51 0.88
 -6 26 6 7.29 0.66
 -6 26 7 -0.02 0.17
 -6 -26 -7 0.19 0.19
 6 26 7 -0.14 0.23
 -6 -26 7 -0.34 0.34
 6 26 8 22.26 1.25
 -6 26 8 21.43 1.14
 -6 26 9 37.16 1.51
 6 26 9 40.57 1.72
 6 26 10 49.63 1.8
 6 26 10 47.89 1.81
 -6 26 10 49.59 1.77
 6 26 11 4.19 0.55
 -6 26 11 4.21 0.55
 6 26 11 3.69 0.52
 6 26 12 29.57 1.42
 -6 26 12 29.56 1.34
 6 26 13 0.97 0.27
 -6 26 13 0.64 0.22
 6 26 14 -0.18 0.19
 -6 26 14 -0.21 0.24
 6 26 15 -0.03 0.12
 -6 26 15 0.19 0.17
 -6 26 16 -0.21 0.17
 -6 28 0 45.99 1.89
 6 28 0 44.52 1.66
 -6 28 1 69.85 2.25
 6 28 -1 67.9 2.05
 6 28 1 69.46 2.05
 -6 28 2 15.69 1.13
 6 28 -2 14.44 0.97
 6 28 2 13.36 0.94
 6 28 -3 0.37 0.22
 6 28 3 -0.13 0.25
 -6 28 3 0.67 0.32
 -6 28 4 0.82 0.32
 -6 28 4 0.55 0.17
 6 28 4 0.93 0.26
 -6 28 5 6.1 0.61
 -6 28 5 5.34 0.68
 6 28 -5 5.93 0.63
 6 28 5 6.03 0.62
 -6 28 6 2.03 0.4
 6 28 6 2.61 0.45
 -6 28 7 0.32 0.2
 6 28 7 0.06 0.2
 -6 28 8 24.85 1.24
 6 28 8 26.9 1.39
 6 28 9 27.28 1.41
 -6 28 9 24.22 1.25
 6 28 10 33.3 1.51
 6 28 10 34.08 1.52
 -6 28 10 34 1.48
 -6 28 11 13.31 0.92
 6 28 11 12.2 0.91
 -6 28 12 7.2 0.67
 -6 28 13 -0.09 0.22
 -6 28 14 0.94 0.27
 -6 28 15 0.26 0.17
 -6 28 16 0.55 0.17
 6 30 0 27.68 1.34
 -6 30 1 17.79 1.3
 6 30 1 16.84 1.09
 6 30 -1 18.47 1.12
 -6 30 2 1.35 0.43
 6 30 -2 1.36 0.37
 6 30 2 0.78 0.28
 -6 30 3 0.38 0.31
 6 30 3 0.34 0.23
 6 30 -3 0.37 0.22
 -6 30 4 4.8 0.55
 -6 30 4 5.27 0.75
 6 30 4 5.87 0.66
 6 30 -4 6.01 0.67
 6 30 -5 9.29 0.8
 6 30 5 10 0.82
 -6 30 5 9.81 0.79
 6 30 6 4.88 0.63
 -6 30 6 5.31 0.6
 -6 30 7 -0.34 0.29
 6 30 7 0.07 0.23
 -6 30 8 5.21 0.61
 6 30 8 5.6 0.68
 -6 30 9 3.01 0.47
 6 30 9 4.32 0.58
 6 30 10 34.56 1.53
 -6 30 10 34.69 1.51
 6 30 10 33.76 1.51
 -6 30 11 8.66 0.76
 6 30 11 8.74 0.75
 -6 30 12 0.35 0.2
 -6 30 13 0.09 0.15
 -6 30 14 3.23 0.45
 -6 30 15 3.24 0.43
 6 32 0 11.9 0.95
 6 32 -1 0.12 0.26
 6 32 1 -0.16 0.27
 6 32 2 -0.1 0.23
 6 32 -2 0.71 0.29
 6 32 -3 2.95 0.49
 6 32 3 2.08 0.42
 -6 32 4 14.34 0.96
 6 32 -4 17.98 1.16
 6 32 4 17.21 1.11
 6 32 -5 25.14 1.36
 6 32 5 22.26 1.29
 -6 32 5 26.6 1.33
 6 32 6 12.84 0.99
 -6 32 6 12.5 0.93
 6 32 7 6.42 0.71
 -6 32 7 8.17 0.76
 -6 32 8 0.97 0.27
 6 32 8 1.21 0.34
 6 32 9 5.95 0.67
 -6 32 9 4.45 0.57
 6 32 10 7.64 0.74
 -6 32 10 8.84 0.76
 6 32 10 7.67 0.72
 6 32 11 1.94 0.38
 -6 32 11 2.21 0.38
 -6 32 12 0.08 0.16
 -6 32 13 1.9 0.34
 -6 32 14 6.74 0.59
 6 34 0 0.7 0.3
 6 34 -1 1.29 0.36
 6 34 1 1.22 0.33
 6 34 2 0.93 0.3
 6 34 -2 1.13 0.36
 -6 34 3 6.98 0.68
 6 34 3 5.6 0.64
 6 34 -3 6.11 0.71
 6 34 -4 46.79 1.88
 6 34 4 42.92 1.7
 6 34 -5 21.77 1.27
 6 34 5 21.56 1.28
 6 34 6 45.21 1.81
 -6 34 6 41.17 1.71
 6 34 7 31.58 1.54
 -6 34 7 32.2 1.48
 -6 34 8 -0.13 0.25
 6 34 8 0.18 0.19
 6 34 9 0.35 0.2
 6 34 9 0.7 0.26
 -6 34 9 0.48 0.23
 6 34 10 0.87 0.27
 6 34 10 1.23 0.33
 -6 34 10 0.89 0.25
 6 34 11 0.48 0.22
 -6 34 11 0.61 0.24
 -6 34 12 0.65 0.24
 -6 34 13 2.27 0.37
 -6 34 14 5.01 0.52
 6 36 0 19.51 1.21
 6 36 1 0.02 0.25
 6 36 -1 0.1 0.24
 -6 36 2 -0.54 0.3
 6 36 -2 -0.25 0.28
 6 36 2 0 0.27
 -6 36 3 6.96 0.7
 6 36 -3 6.64 0.75
 6 36 3 6.62 0.71
 6 36 -4 35.38 1.65
 6 36 4 34.85 1.55
 6 36 -5 20.28 1.25
 6 36 5 22.09 1.29
 -6 36 5 23.11 1.3
 6 36 6 53.23 1.95
 -6 36 6 49.14 1.81
 6 36 7 9.64 0.85
 -6 36 7 9.6 0.83
 -6 36 8 1.97 0.4
 6 36 8 2.59 0.45
 6 36 9 0.86 0.3
 6 36 9 0.56 0.24
 -6 36 9 0.56 0.23
 6 36 10 0.58 0.23
 6 36 10 0.48 0.2
 -6 36 10 0.36 0.21
 6 36 11 0.49 0.19
 -6 36 11 0.65 0.25
 -6 36 12 -0.04 0.16
 -6 36 13 2.44 0.35
 6 38 0 53.29 2
 6 38 -1 2.31 0.49
 6 38 1 1.75 0.43
 -6 38 2 2.66 0.44
 6 38 2 2.89 0.49
 6 38 -2 3.73 0.52
 6 38 3 1.13 0.37
 -6 38 3 1.61 0.33
 6 38 -3 1.64 0.4
 6 38 -4 21.86 1.3
 6 38 4 21.71 1.26
 -6 38 4 18.63 1.13
 6 38 -5 13.05 0.99
 6 38 5 14.89 1.04
 -6 38 5 14.76 1.01
 6 38 6 14.49 1.01
 -6 38 6 12.32 0.92
 6 38 7 3.78 0.53
 -6 38 7 3.36 0.49
 -6 38 8 -0.18 0.2
 6 38 8 -0.22 0.21
 6 38 9 2.36 0.41
 -6 38 9 2.29 0.39
 6 38 9 2.88 0.44
 6 38 10 1.9 0.34
 -6 38 10 1.72 0.35
 6 38 10 1.49 0.32
 6 38 11 1.75 0.29
 -6 38 11 3.4 0.43
 -6 38 12 -0.09 0.14
 6 40 0 45.26 1.8
 6 40 -1 2.87 0.54
 6 40 1 2.29 0.49
 6 40 -2 7.4 0.75
 6 40 2 7.29 0.73
 -6 40 2 7.06 0.69
 -6 40 3 0.43 0.21
 6 40 -3 0.04 0.21
 6 40 3 0.53 0.3
 6 40 -4 6.45 0.7
 6 40 4 6.89 0.71
 -6 40 4 5.17 0.61
 -6 40 5 1.72 0.38
 6 40 5 2.4 0.44
 6 40 6 4.54 0.57
 -6 40 6 3.49 0.48
 -6 40 7 0.25 0.19
 6 40 7 -0.27 0.24
 6 40 8 3.52 0.47
 6 40 8 3.51 0.49
 -6 40 8 3.16 0.45
 -6 40 9 12.54 0.84
 6 40 9 12.26 0.83
 6 40 9 12.66 0.82
 -6 40 10 4.08 0.49
 6 40 10 3.41 0.42
 -6 40 11 6.34 0.56
 6 42 0 32.37 1.49
 6 42 -1 2.42 0.47
 6 42 1 3.1 0.54
 6 42 -2 14.07 0.99
 6 42 2 15.29 1.01
 6 42 3 0.24 0.2
 -6 42 3 0.04 0.2
 6 42 -3 0.11 0.19
 -6 42 4 1.68 0.35
 6 42 -4 1.97 0.4
 6 42 4 1.95 0.41
 -6 42 5 0.21 0.19
 6 42 5 -0.08 0.22
 -6 42 6 0.12 0.17
 6 42 6 -0.35 0.25
 6 42 7 1.95 0.37
 6 42 7 2.06 0.36
 -6 42 7 1.65 0.34
 6 42 8 7.21 0.64
 -6 42 8 6.91 0.62
 6 42 8 7.65 0.65
 -6 42 9 19.75 0.98
 6 42 9 17.66 0.91
 6 44 0 41.94 1.61
 6 44 -1 4.41 0.57
 6 44 1 4.92 0.58
 6 44 -2 13.8 0.93
 6 44 2 13.04 0.89
 6 44 -3 0.27 0.2
 6 44 3 0.48 0.23
 -6 44 4 -0.32 0.19
 6 44 4 0.13 0.15
 6 44 -4 -0.18 0.18
 -6 44 5 0.21 0.17
 6 44 5 0.17 0.15
 6 44 6 -0.17 0.2
 -6 44 6 0.15 0.15
 6 44 7 1.99 0.34
 6 44 7 1.87 0.32
 -6 44 7 1.61 0.3
 6 46 0 29.75 1.28
 6 46 -1 5.19 0.56
 6 46 1 4.16 0.53
 6 46 -2 3.49 0.47
 6 46 2 3.82 0.48
 6 46 -3 0.15 0.17
 6 46 3 -0.16 0.15
 6 46 4 0.46 0.17
 6 46 5 0.49 0.19
 -7 -1 0 0.63 0.13
 -7 1 0 0.55 0.12
 -7 -1 -1 30.1 0.77
 -7 -1 1 31.19 0.79
 -7 1 1 31.33 0.77
 -7 1 -1 29.97 0.75
 -7 -1 2 3.09 0.27
 -7 1 2 2.93 0.27
 -7 -1 3 26.76 0.82
 -7 1 3 26.15 0.79
 -7 -1 4 13.1 0.61
 -7 1 4 13.85 0.62
 -7 -1 5 81.93 1.59
 -7 1 5 84.96 1.59
 -7 -1 6 59.89 1.42
 -7 1 6 60.64 1.42
 -7 1 7 56.54 1.47
 -7 -1 7 56.36 1.48
 -7 -1 8 10.69 0.7
 -7 1 8 10.79 0.77
 -7 1 8 10.77 0.7
 -7 1 9 0.67 0.2
 -7 1 9 0.74 0.25
 -7 -1 9 0.86 0.23
 -7 1 9 1.08 0.29
 -7 -1 10 8.22 0.66
 -7 1 10 8.19 0.68
 -7 1 10 6.95 0.68
 7 1 11 0.22 0.18
 7 -1 11 0.18 0.18
 -7 1 11 -0.03 0.16
 -7 -1 11 0.04 0.12
 -7 1 11 0.47 0.28
 7 -1 12 0.45 0.22
 7 1 12 0.18 0.17
 7 -1 13 0.8 0.26
 7 1 13 0.68 0.29
 7 -1 14 19.65 1.14
 7 1 14 19.21 1.14
 7 -1 15 0.95 0.35
 7 1 15 1.08 0.37
 7 -1 16 21.98 1.22
 7 1 16 20.81 1.19
 7 -1 17 0.76 0.25
 7 1 17 0.52 0.22
 7 -1 18 0.15 0.18
 7 1 18 0.03 0.14
 7 -1 19 -0.06 0.11
 7 1 19 -0.06 0.11
 -7 3 0 16.15 0.54
 -7 -3 0 15.45 0.55
 -7 3 1 10.97 0.45
 -7 -3 -1 9.7 0.46
 -7 3 -1 10.29 0.43
 -7 -3 1 11.27 0.49
 -7 -3 2 4.91 0.35
 -7 3 2 5.2 0.33
 -7 3 3 3.04 0.27
 -7 -3 3 2.91 0.29
 -7 -3 4 9.38 0.54
 -7 3 4 10.35 0.53
 -7 -3 5 53.57 1.32
 -7 3 5 50.7 1.2
 -7 -3 6 17.46 0.8
 -7 3 6 17.6 0.78
 -7 3 7 9.95 0.7
 -7 3 7 8.7 0.58
 -7 -3 7 8.47 0.61
 -7 -3 8 0.69 0.22
 -7 3 8 0.51 0.19
 -7 3 8 0.24 0.16
 -7 3 8 0.57 0.17
 -7 -3 9 3.14 0.42
 -7 3 9 2.82 0.38
 -7 3 9 3.35 0.45
 -7 3 9 3.3 0.46
 -7 3 10 17.3 0.96
 -7 3 10 16.91 1
 -7 3 10 16.49 1
 -7 -3 10 17.76 0.99
 -7 -3 11 0.64 0.24
 7 -3 11 0.59 0.25
 7 3 11 0.5 0.22
 -7 3 11 0.38 0.23
 -7 3 11 0.83 0.31
 7 -3 12 0.54 0.23
 7 3 12 0.63 0.25
 -7 3 12 0.83 0.3
 7 3 13 0.54 0.23
 7 -3 13 0.8 0.28
 7 -3 14 12.14 0.92
 7 3 14 12.59 0.93
 7 -3 15 2.02 0.43
 7 3 15 2.11 0.42
 7 -3 16 15.38 1.01
 7 3 16 16.06 1.04
 7 -3 17 0.45 0.21
 7 3 17 0.17 0.16
 7 -3 18 0.48 0.18
 7 3 18 0.38 0.16
 7 3 19 0.31 0.15
 7 -3 19 0.29 0.14
 -7 -5 0 21.65 0.67
 -7 5 0 22.59 0.6
 -7 -5 -1 24.14 0.73
 -7 5 -1 24 0.62
 -7 -5 1 25.01 0.76
 -7 5 1 24.64 0.65
 -7 -5 2 2.48 0.27
 -7 5 2 2.37 0.22
 -7 5 3 2.12 0.23
 -7 -5 3 1.83 0.23
 -7 5 4 2.11 0.24
 -7 -5 4 1.91 0.24
 -7 -5 5 4.54 0.41
 -7 5 5 4.07 0.35
 -7 5 6 15.64 0.73
 -7 -5 6 15.06 0.77
 -7 5 7 1.33 0.25
 -7 5 7 1.38 0.24
 -7 -5 7 1.54 0.27
 -7 -5 8 10.05 0.72
 -7 5 8 11.63 0.72
 -7 5 8 11.42 0.76
 -7 5 8 9.83 0.71
 -7 5 9 28.41 1.25
 7 5 9 23.05 1.27
 -7 5 9 21.41 1.13
 -7 -5 9 25.99 1.18
 -7 5 9 23.93 1.09
 7 -5 10 37.52 1.5
 -7 5 10 42.9 1.63
 -7 5 10 37.29 1.56
 -7 -5 10 42.78 1.57
 7 -5 11 4.18 0.56
 -7 5 11 4.24 0.57
 -7 -5 11 3.75 0.5
 -7 5 11 4.08 0.57
 7 -5 12 5.28 0.64
 7 5 12 5.85 0.63
 -7 -5 12 6.89 0.7
 -7 5 12 6.76 0.75
 -7 5 12 6.24 0.71
 7 -5 13 0.6 0.25
 7 5 13 0.44 0.23
 7 -5 14 8.36 0.77
 7 5 14 7.51 0.76
 7 5 15 4.07 0.56
 7 -5 15 3.4 0.54
 7 -5 16 3.54 0.5
 7 5 16 3.54 0.49
 7 -5 17 0.15 0.15
 7 5 17 0.2 0.17
 7 5 18 1.64 0.34
 7 -5 18 1.17 0.26
 7 5 19 1.93 0.32
 7 -5 19 1.28 0.27
 -7 -7 0 61.37 1.15
 -7 7 0 61.23 0.94
 -7 -7 -1 79.29 1.34
 -7 -7 1 81.08 1.39
 -7 7 1 80.94 1.15
 -7 7 -1 78.94 1.06
 -7 7 2 1.93 0.2
 -7 -7 2 1.69 0.24
 -7 -7 3 0.9 0.17
 -7 7 3 1.08 0.16
 -7 7 4 2.89 0.3
 -7 -7 4 2.34 0.28
 -7 7 5 0.9 0.19
 -7 -7 5 0.69 0.17
 -7 -7 6 0.43 0.16
 -7 7 6 0.32 0.13
 -7 7 6 0.13 0.15
 -7 7 7 1.41 0.24
 -7 7 7 1.55 0.27
 7 7 7 1.42 0.34
 -7 -7 7 1.4 0.26
 -7 7 8 57.29 1.65
 -7 7 8 56.28 1.62
 -7 7 8 60.89 1.64
 -7 -7 8 54.78 1.64
 -7 -7 9 44.95 1.55
 -7 7 9 47.46 1.59
 7 7 9 42.57 1.78
 7 -7 10 44.58 1.64
 -7 7 10 53.66 1.77
 -7 -7 10 51.14 1.73
 -7 7 10 47.82 1.7
 7 -7 11 16.92 1.06
 -7 -7 11 13.36 0.94
 -7 7 11 16.03 1.04
 -7 7 11 12.11 0.97
 -7 -7 12 12.29 0.93
 7 -7 12 11.15 0.9
 7 7 12 11.39 0.89
 -7 7 12 12.48 1
 -7 7 12 10.86 0.92
 7 -7 13 0.36 0.18
 7 7 13 0.21 0.19
 7 7 14 6.38 0.71
 7 -7 14 5.94 0.65
 7 -7 15 0.56 0.25
 7 7 15 0.34 0.19
 7 -7 16 -0.21 0.21
 7 7 16 -0.48 0.33
 7 -7 17 0.22 0.17
 7 7 17 0.65 0.26
 7 7 18 5.86 0.59
 7 7 19 4.68 0.48
 -7 -9 0 104.74 1.55
 -7 9 0 101.8 1.13
 -7 9 -1 131.34 1.28
 -7 -9 -1 134.16 1.8
 -7 9 2 11.07 0.45
 -7 9 -2 10.97 0.4
 -7 -9 2 11.07 0.57
 -7 -9 3 1.91 0.25
 -7 9 3 2.41 0.24
 -7 9 4 2.18 0.25
 -7 -9 4 2.49 0.3
 -7 -9 5 11.27 0.67
 -7 9 5 10.57 0.56
 7 9 6 4.88 0.56
 -7 -9 6 7.2 0.57
 -7 9 6 7.89 0.54
 -7 9 6 5.32 0.47
 -7 9 7 6.72 0.5
 7 9 7 8.1 0.76
 -7 9 7 6.83 0.58
 -7 -9 7 7.41 0.59
 7 9 8 28.12 1.45
 -7 9 8 28.89 1.17
 -7 9 8 26.79 1.14
 -7 -9 8 26.49 1.16
 -7 -9 9 50.74 1.69
 -7 9 9 54.71 1.7
 7 -9 9 55.66 1.78
 7 9 9 54.84 2.07
 -7 9 10 68.84 2
 -7 -9 10 63.25 1.99
 -7 9 10 64.32 1.98
 7 -9 11 21.09 1.19
 -7 -9 11 18.61 1.14
 -7 9 11 21.32 1.18
 -7 9 11 19.14 1.15
 7 -9 12 12.93 0.95
 7 9 12 15.6 1.06
 -7 9 12 14.63 1.07
 -7 -9 12 14.4 1.04
 -7 9 12 15.74 1.08
 7 -9 13 0.64 0.27
 7 9 13 0.57 0.25
 -7 9 13 1.23 0.46
 7 -9 14 1.02 0.29
 7 9 14 1.69 0.4
 7 -9 15 0.47 0.22
 7 9 15 0.44 0.24
 7 -9 16 0.59 0.23
 7 9 16 -0.1 0.24
 7 9 17 1.4 0.32
 7 9 18 4 0.49
 7 9 19 7.02 0.58
 -7 11 0 104.63 1
 -7 -11 0 133.47 1.83
 -7 -11 1 135.35 1.9
 -7 -11 -1 132.09 1.84
 -7 11 2 18.58 0.52
 -7 -11 2 19.77 0.79
 -7 -11 3 1.7 0.24
 -7 11 3 1.64 0.18
 -7 11 4 11.69 0.52
 -7 -11 4 11.08 0.65
 -7 -11 5 53.5 1.51
 -7 11 5 54.24 1.22
 7 11 6 15.74 1.03
 -7 -11 6 18.5 0.92
 -7 11 6 15.67 0.84
 -7 -11 7 0.76 0.21
 7 11 7 0.12 0.23
 -7 11 7 0.36 0.15
 -7 11 8 17.48 0.92
 -7 11 8 17.76 0.94
 7 11 8 18.84 1.2
 -7 -11 8 15.95 0.96
 -7 -11 9 29.67 1.34
 7 11 9 30.97 1.55
 -7 11 9 31.1 1.28
 -7 11 9 26.46 1.21
 -7 11 10 42.71 1.61
 -7 -11 10 44.65 1.73
 -7 11 10 44.7 1.64
 -7 -11 11 15.45 1.06
 7 11 11 15.93 1.05
 -7 11 11 14.97 1.03
 -7 11 11 14.39 1.02
 -7 -11 12 2.12 0.43
 -7 11 12 2.26 0.46
 7 11 12 1.9 0.42
 -7 11 12 2.02 0.42
 7 11 13 3.69 0.55
 -7 11 13 4.24 0.63
 7 11 14 1.28 0.35
 -7 11 14 0.83 0.35
 7 11 15 0.36 0.19
 7 11 16 0.07 0.18
 7 11 17 0.34 0.21
 7 11 18 1.88 0.35
 7 11 19 2.71 0.37
 -7 -13 0 151.47 2.07
 -7 -13 1 40.92 1.1
 -7 -13 -1 41.6 1.09
 -7 -13 -2 15.23 0.7
 -7 -13 2 14.38 0.69
 -7 -13 3 4.63 0.42
 7 13 4 108.14 2.42
 -7 -13 4 107.06 2.06
 -7 -13 5 43.39 1.41
 -7 13 5 40.66 1.25
 7 13 6 44.76 1.73
 -7 -13 6 41.85 1.43
 -7 13 6 42.5 1.34
 7 13 7 13.39 1
 -7 -13 7 15.58 0.92
 -7 13 7 12.51 0.78
 7 13 8 3.02 0.49
 -7 -13 8 3.43 0.44
 -7 13 8 2.26 0.33
 -7 -13 9 17.28 1.07
 7 13 9 19.6 1.22
 -7 13 9 18.43 1
 -7 13 9 18.62 1.02
 -7 13 10 12.65 0.9
 7 13 10 12.47 0.96
 -7 -13 10 13.39 0.98
 -7 13 10 13.71 0.93
 -7 -13 11 2.51 0.46
 7 13 11 3.36 0.53
 -7 13 11 2.3 0.39
 -7 13 11 2.99 0.5
 7 13 12 2.83 0.53
 -7 13 12 2.46 0.47
 -7 -13 12 2.5 0.46
 7 13 13 0.52 0.28
 -7 13 13 0.62 0.35
 7 13 14 1.48 0.4
 -7 13 14 1.64 0.43
 7 13 15 8.52 0.79
 -7 13 15 7.8 0.78
 7 13 16 0.91 0.33
 7 13 17 0.2 0.22
 7 13 18 0.03 0.14
 7 13 19 1.86 0.31
 -7 -15 0 48.69 1.26
 -7 -15 -1 23.53 0.86
 -7 -15 1 22.04 0.86
 -7 -15 -2 7.4 0.51
 7 15 2 6.78 0.61
 -7 -15 2 6.23 0.48
 7 15 3 29.93 1.25
 -7 -15 3 37.96 1.22
 -7 15 4 52.85 1.44
 -7 -15 4 55.84 1.56
 -7 -15 5 56.55 1.65
 -7 15 5 51.79 1.46
 7 15 6 57.05 1.94
 -7 15 6 53.78 1.54
 -7 -15 6 52.57 1.66
 7 15 7 14.43 1.02
 -7 15 7 15.3 0.88
 -7 -15 8 0.43 0.19
 7 15 8 0.4 0.21
 -7 15 8 0.89 0.29
 -7 -15 9 3.2 0.48
 -7 15 9 2.68 0.37
 7 15 10 1.48 0.37
 -7 -15 10 1.84 0.39
 -7 15 10 1.12 0.26
 -7 -15 11 1.96 0.41
 7 15 11 2.41 0.49
 -7 15 11 1.51 0.32
 -7 -15 12 0.09 0.14
 -7 15 12 -0.29 0.26
 7 15 12 0.07 0.22
 7 15 13 8.21 0.81
 -7 15 13 7.62 0.8
 7 15 14 4.86 0.67
 -7 15 14 6.36 0.73
 7 15 15 25.95 1.37
 -7 15 15 23.47 1.26
 7 15 16 3.59 0.57
 7 15 17 2.86 0.45
 7 15 18 -0.21 0.16
 7 17 0 29.97 1.21
 -7 -17 0 30.06 1.04
 7 17 -1 0.16 0.19
 7 17 1 0.16 0.19
 -7 -17 -1 0.05 0.09
 -7 -17 1 0 0.11
 7 17 2 50.45 1.59
 -7 -17 -2 50.48 1.39
 7 17 -2 46.92 1.46
 -7 -17 2 47.49 1.36
 -7 -17 -3 11.9 0.73
 7 17 3 6.84 0.63
 -7 -17 3 10.24 0.68
 -7 17 3 8.75 0.59
 7 17 4 80.39 2.1
 -7 17 4 79.65 1.8
 -7 -17 4 75.81 1.88
 -7 -17 5 37.88 1.43
 -7 17 5 37.09 1.28
 -7 -17 6 71.36 2.02
 7 17 6 76.98 2.2
 -7 17 6 74.1 1.83
 7 17 7 17.59 1.12
 -7 -17 7 21.24 1.14
 -7 17 7 18.6 0.98
 -7 -17 8 0.7 0.23
 7 17 8 1.1 0.39
 -7 17 8 0.97 0.28
 -7 -17 9 0.93 0.29
 7 17 9 1.27 0.38
 -7 17 9 0.85 0.21
 7 17 10 1.07 0.3
 -7 -17 10 1.54 0.39
 -7 17 10 0.44 0.2
 7 17 11 -0.08 0.23
 -7 -17 11 -0.03 0.16
 -7 17 11 -0.23 0.26
 -7 -17 12 1.07 0.31
 -7 17 12 1.53 0.37
 7 17 13 31.6 1.61
 -7 17 13 28.27 1.39
 7 17 14 4.33 0.63
 -7 17 14 5.14 0.67
 7 17 15 44.56 1.8
 -7 17 15 40.85 1.62
 7 17 16 5.84 0.66
 7 17 17 5.41 0.58
 7 17 18 0.01 0.11
 7 19 0 1.15 0.26
 -7 -19 0 0.94 0.21
 -7 -19 1 0.3 0.14
 7 19 -1 0.34 0.17
 7 19 1 0.36 0.21
 -7 -19 -1 0.3 0.13
 -7 19 2 2.34 0.31
 7 19 2 3.65 0.46
 7 19 -2 3.6 0.44
 -7 -19 -2 3.24 0.37
 -7 -19 2 3.1 0.38
 7 19 3 6.3 0.59
 7 19 -3 5.63 0.56
 -7 -19 -3 7.83 0.62
 -7 -19 3 7.23 0.61
 -7 19 3 5.96 0.52
 7 19 4 74.61 2.01
 -7 19 4 74.9 1.84
 -7 -19 4 75.46 2
 -7 -19 5 35.34 1.45
 -7 19 5 32.09 1.24
 -7 -19 6 58.39 1.92
 7 19 6 59.53 1.96
 -7 19 6 56.75 1.69
 -7 -19 7 19.81 1.16
 7 19 7 17.33 1.07
 -7 19 7 18.77 0.99
 -7 -19 8 0.15 0.16
 7 19 8 0.46 0.25
 -7 19 8 0.49 0.25
 -7 -19 9 3.37 0.54
 7 19 9 3.57 0.54
 -7 19 9 4.02 0.53
 7 19 10 1.55 0.39
 7 19 10 1.29 0.33
 -7 -19 10 1.81 0.43
 -7 19 10 0.92 0.24
 -7 -19 11 0.1 0.19
 7 19 11 0.26 0.27
 -7 19 11 -0.34 0.29
 7 19 12 1.22 0.37
 -7 19 12 0.42 0.21
 7 19 13 15.64 1.11
 -7 19 13 12.15 0.9
 7 19 14 2.24 0.49
 -7 19 14 2.26 0.52
 -7 19 15 36.15 1.51
 7 19 15 42.62 1.72
 -7 19 16 2.23 0.42
 7 19 16 2.08 0.44
 7 19 17 4.75 0.53
 7 19 18 -0.12 0.13
 -7 -21 0 4.38 0.46
 7 21 0 2.86 0.4
[truncated: 163,225 more chars]
