# Supplementary material
Source: publisher figshare collection journal article supplement (https://acs.figshare.com/ndownloader/files/16775912)
Supplement: Supplementary file 1 [file 16775912 › LIFM-114-Methanol-solved.cif]

 
data_LIFM-114-Methanol
 
_audit_creation_method            'SHELXL-2014/7'
_shelx_SHELXL_version_number      '2014/7'
_chemical_name_systematic         ?
_chemical_name_common             LIFM-114-Methanol
_chemical_melting_point           ?
_chemical_formula_moiety           'C108 H64 O32 Zr6 [+ solvent]' 
_chemical_formula_sum
 'C108 H64 O32 Zr6' 
_chemical_formula_weight          2420.91

loop_
 _atom_type_symbol
 _atom_type_description
 _atom_type_scat_dispersion_real
 _atom_type_scat_dispersion_imag
 _atom_type_scat_source
 'C'  'C'   0.0181   0.0091
 'International Tables Vol C Tables 4.2.6.8 and 6.1.1.4'
 'H'  'H'   0.0000   0.0000
 'International Tables Vol C Tables 4.2.6.8 and 6.1.1.4'
 'N'  'N'   0.0311   0.0180
 'International Tables Vol C Tables 4.2.6.8 and 6.1.1.4'
 'O'  'O'   0.0492   0.0322
 'International Tables Vol C Tables 4.2.6.8 and 6.1.1.4'
 'Zr'  'Zr'  -0.1862   2.2449
 'International Tables Vol C Tables 4.2.6.8 and 6.1.1.4'
 
_space_group_crystal_system       orthorhombic
_space_group_IT_number            67
_space_group_name_H-M_alt         'C m m a'
_space_group_name_Hall            '-C 2b 2'
 
_shelx_space_group_comment
;
The symmetry employed for this shelxl refinement is uniquely defined
by the following loop, which should always be used as a source of
symmetry information in preference to the above space-group names.
They are only intended as comments.
;
 
loop_
 _space_group_symop_operation_xyz
 'x, y, z'
 '-x, -y+1/2, z'
 'x, -y, -z'
 '-x, y+1/2, -z'
 'x+1/2, y+1/2, z'
 '-x+1/2, -y+1, z'
 'x+1/2, -y+1/2, -z'
 '-x+1/2, y+1, -z'
 '-x, -y, -z'
 'x, y-1/2, -z'
 '-x, y, z'
 'x, -y-1/2, z'
 '-x+1/2, -y+1/2, -z'
 'x+1/2, y, -z'
 '-x+1/2, y+1/2, z'
 'x+1/2, -y, z'
 
_cell_length_a                    22.0159(12)
_cell_length_b                    42.2419(14)
_cell_length_c                    17.8711(5)
_cell_angle_alpha                 90
_cell_angle_beta                  90
_cell_angle_gamma                 90
_cell_volume                      16620.0(12)
_cell_formula_units_Z             4
_cell_measurement_temperature     150(2)
_cell_measurement_reflns_used   5511
_cell_measurement_theta_min     4.4480
_cell_measurement_theta_max     65.1270
 
_exptl_crystal_description        Rod
_exptl_crystal_colour             Colourless
_exptl_crystal_density_meas       ?
_exptl_crystal_density_method     ?
_exptl_crystal_density_diffrn     0.968          
_exptl_crystal_F_000              4832
_exptl_transmission_factor_min    ?
_exptl_transmission_factor_max    ?
_exptl_crystal_size_max           0.3
_exptl_crystal_size_mid           0.1
_exptl_crystal_size_min           0.1
_exptl_absorpt_coefficient_mu     3.400
_shelx_estimated_absorpt_T_min    ?
_shelx_estimated_absorpt_T_max    ?
_exptl_absorpt_correction_T_min                   0.43315
_exptl_absorpt_correction_T_max                   1.00000
_exptl_absorpt_correction_type            multi-scan
_exptl_absorpt_process_details
;
CrysAlisPro 1.171.38.43 (Rigaku Oxford Diffraction, 2015)
Empirical absorption correction using spherical harmonics,
 implemented in SCALE3 ABSPACK scaling algorithm.
;
_exptl_absorpt_special_details    ?
_diffrn_ambient_temperature       150(2)
_diffrn_radiation_wavelength      1.54184
_diffrn_radiation_type            CuK\a
_diffrn_source 'micro-focus sealed X-ray tube'
_diffrn_source_type 'SuperNova (Cu) X-ray Source'
_diffrn_radiation_monochromator mirror
_diffrn_measurement_device 'four-circle diffractometer'
_diffrn_measurement_device_type 'SuperNova, Dual, Cu at zero, Atlas'
_diffrn_detector 'CCD plate'
_diffrn_detector_type Atlas
_diffrn_measurement_method        '\w scans'
_diffrn_detector_area_resol_mean  10.6525
_diffrn_reflns_number             15692
_diffrn_reflns_av_unetI/netI      0.0332
_diffrn_reflns_av_R_equivalents   0.0308
_diffrn_reflns_limit_h_min        -24
_diffrn_reflns_limit_h_max        25
_diffrn_reflns_limit_k_min        -34
_diffrn_reflns_limit_k_max        48
_diffrn_reflns_limit_l_min        -20
_diffrn_reflns_limit_l_max        11
_diffrn_reflns_theta_min          4.186
_diffrn_reflns_theta_max          65.366
_diffrn_reflns_theta_full         65.366
_diffrn_measured_fraction_theta_max   0.962
_diffrn_measured_fraction_theta_full  0.962
_diffrn_reflns_Laue_measured_fraction_max    0.962
_diffrn_reflns_Laue_measured_fraction_full   0.962
_diffrn_reflns_point_group_measured_fraction_max   0.962
_diffrn_reflns_point_group_measured_fraction_full  0.962
_reflns_number_total              7162
_reflns_number_gt                 5798
_reflns_threshold_expression      'I > 2\s(I)'
_reflns_Friedel_coverage          0.000
_reflns_Friedel_fraction_max      .
_reflns_Friedel_fraction_full     .
 
_reflns_special_details
;
 Reflections were merged by SHELXL according to the crystal
 class for the calculation of statistics and refinement.
 
 Structure factors included contributions from the .fab file.
 
 _reflns_Friedel_fraction is defined as the number of unique
 Friedel pairs measured divided by the number that would be
 possible theoretically, ignoring centric projections and
 systematic absences.
;
 
_computing_data_collection        ?
_computing_cell_refinement        ?
_computing_data_reduction         ?
_computing_structure_solution   'SHELXL-2014/7 (Sheldrick, 2014)'
_computing_structure_refinement 'SHELXL-2014/7 (Sheldrick, 2014)'
_computing_molecular_graphics     ?
_computing_publication_material   ?
_refine_special_details           ?
_refine_ls_structure_factor_coef  Fsqd
_refine_ls_matrix_type            full
_refine_ls_weighting_scheme       calc
_refine_ls_weighting_details
'w=1/[\s^2^(Fo^2^)+(0.0840P)^2^+55.9750P] where P=(Fo^2^+2Fc^2^)/3'
_atom_sites_solution_primary      ?
_atom_sites_solution_secondary    ?
_atom_sites_solution_hydrogens    geom
_refine_ls_hydrogen_treatment     constr
_refine_ls_extinction_method      none
_refine_ls_extinction_coef        .
_refine_ls_number_reflns          7162
_refine_ls_number_parameters      344
_refine_ls_number_restraints      6
_refine_ls_R_factor_all           0.0594
_refine_ls_R_factor_gt            0.0507
_refine_ls_wR_factor_ref          0.1571
_refine_ls_wR_factor_gt           0.1498
_refine_ls_goodness_of_fit_ref    1.067
_refine_ls_restrained_S_all       1.072
_refine_ls_shift/su_max           0.002
_refine_ls_shift/su_mean          0.000
 
loop_
 _atom_site_label
 _atom_site_type_symbol
 _atom_site_fract_x
 _atom_site_fract_y
 _atom_site_fract_z
 _atom_site_U_iso_or_equiv
 _atom_site_adp_type
 _atom_site_occupancy
 _atom_site_site_symmetry_order  
 _atom_site_calc_flag
 _atom_site_refinement_flags_posn
 _atom_site_refinement_flags_adp
 _atom_site_refinement_flags_occupancy
 _atom_site_disorder_assembly
 _atom_site_disorder_group
Zr1 Zr 0.0000 0.19191(2) -0.77160(2) 0.02338(15) Uani 1 2 d S T P . .
Zr2 Zr 0.08070(2) 0.2500 -0.67242(3) 0.02816(16) Uani 1 2 d S T P . .
Zr3 Zr 0.08082(2) 0.2500 -0.87054(3) 0.02733(16) Uani 1 2 d S T P . .
O1 O 0.06028(15) 0.16534(7) -0.69658(16) 0.0378(7) Uani 1 1 d . . . . .
O2 O 0.11045(18) 0.20235(7) -0.63022(19) 0.0538(10) Uani 1 1 d . . . . .
O3 O 0.05975(14) 0.16514(7) 0.15282(16) 0.0368(7) Uani 1 1 d . . . . .
O4 O 0.11141(17) 0.20180(7) 0.0875(2) 0.0511(9) Uani 1 1 d . . . . .
O5 O 0.0000 0.22137(13) -0.8712(4) 0.0716(19) Uani 1 2 d S T P . .
O6 O 0.0000 0.22162(13) -0.6720(4) 0.0727(18) Uani 1 2 d S TU P . .
O7 O 0.0736(3) 0.2500 -0.5487(2) 0.0640(15) Uani 1 2 d S T P . .
O8 O 0.1804(2) 0.2500 -0.6775(3) 0.0620(15) Uani 1 2 d S T P . .
O9 O 0.0737(2) 0.2500 -0.9935(3) 0.0525(13) Uani 1 2 d S T P . .
O10 O 0.1796(2) 0.2500 -0.8683(3) 0.0611(15) Uani 1 2 d S T P . .
O11 O 0.0809(2) 0.22197(9) -0.77169(17) 0.0755(16) Uani 1 1 d . . . . .
C1 C 0.0938(2) 0.17433(11) -0.6431(3) 0.0432(11) Uani 1 1 d . . . . .
C2 C 0.1154(3) 0.14877(11) -0.5908(3) 0.0483(12) Uani 1 1 d . . . . .
C3 C 0.0976(3) 0.11814(13) -0.6001(4) 0.077(2) Uani 1 1 d . . . . .
H3 H 0.0711 0.1128 -0.6401 0.093 Uiso 1 1 calc R U . . .
C4 C 0.1174(4) 0.09478(14) -0.5524(4) 0.085(2) Uani 1 1 d . . . . .
H4 H 0.1051 0.0735 -0.5605 0.102 Uiso 1 1 calc R U . . .
C5 C 0.1553(3) 0.10202(12) -0.4926(3) 0.0586(15) Uani 1 1 d . . . . .
C6 C 0.1710(4) 0.13288(13) -0.4825(4) 0.083(2) Uani 1 1 d . . . . .
H6 H 0.1956 0.1385 -0.4409 0.100 Uiso 1 1 calc R U . . .
C7 C 0.1521(3) 0.15597(13) -0.5310(3) 0.076(2) Uani 1 1 d . . . . .
H7 H 0.1645 0.1773 -0.5232 0.091 Uiso 1 1 calc R U . . .
C8 C 0.1785(3) 0.07606(13) -0.4428(3) 0.0606(16) Uani 1 1 d . . . . .
C9 C 0.1589(5) 0.04558(15) -0.4501(4) 0.133(4) Uani 1 1 d . . . . .
H9 H 0.1274 0.0408 -0.4847 0.160 Uiso 1 1 calc R U . . .
C10 C 0.1841(5) 0.02166(15) -0.4078(4) 0.132(4) Uani 1 1 d . . . . .
H10 H 0.1718 0.0005 -0.4171 0.158 Uiso 1 1 calc R U . . .
C11 C 0.2254(3) 0.02711(12) -0.3538(3) 0.0630(18) Uani 1 1 d . . . . .
C12 C 0.2449(4) 0.05727(14) -0.3460(3) 0.076(2) Uani 1 1 d . . . . .
H12 H 0.2751 0.0620 -0.3097 0.092 Uiso 1 1 calc R U . . .
C13 C 0.2215(3) 0.08165(15) -0.3899(3) 0.077(2) Uani 1 1 d . . . . .
H13 H 0.2359 0.1026 -0.3827 0.093 Uiso 1 1 calc R U . . .
C14 C 0.2500 0.0000 -0.3086(4) 0.060(2) Uani 1 2 d S T P . .
C15 C 0.2500 0.0000 -0.2330(3) 0.062(2) Uani 1 2 d S T P . .
C16 C 0.2239(3) 0.02665(13) -0.1878(3) 0.0610(16) Uani 1 1 d . . . . .
C17 C 0.2618(3) 0.04486(15) -0.1437(3) 0.076(2) Uani 1 1 d . . . . .
H17 H 0.3039 0.0400 -0.1419 0.091 Uiso 1 1 calc R U . . .
C18 C 0.2399(3) 0.06976(15) -0.1026(3) 0.0737(19) Uani 1 1 d . . . . .
H18 H 0.2674 0.0827 -0.0753 0.088 Uiso 1 1 calc R U . . .
C19 C 0.1797(3) 0.07619(13) -0.1003(3) 0.0589(15) Uani 1 1 d . . . . .
C20 C 0.1410(3) 0.05776(15) -0.1433(4) 0.0763(19) Uani 1 1 d . . . . .
H20 H 0.0985 0.0618 -0.1423 0.092 Uiso 1 1 calc R U . . .
C21 C 0.1635(3) 0.03328(15) -0.1878(3) 0.0744(19) Uani 1 1 d . . . . .
H21 H 0.1366 0.0213 -0.2182 0.089 Uiso 1 1 calc R U . . .
C22 C 0.1559(3) 0.10171(13) -0.0506(3) 0.0566(14) Uani 1 1 d . . . . .
C23 C 0.1084(3) 0.09632(13) -0.0021(4) 0.0708(18) Uani 1 1 d . . . . .
H23 H 0.0880 0.0765 -0.0034 0.085 Uiso 1 1 calc R U . . .
C24 C 0.0896(3) 0.11918(13) 0.0484(3) 0.0627(16) Uani 1 1 d . . . . .
H24 H 0.0583 0.1146 0.0832 0.075 Uiso 1 1 calc R U . . .
C25 C 0.1166(2) 0.14863(11) 0.0480(3) 0.0469(12) Uani 1 1 d . . . . .
C26 C 0.1631(3) 0.15454(13) -0.0012(3) 0.0678(17) Uani 1 1 d . . . . .
H26 H 0.1817 0.1748 -0.0018 0.081 Uiso 1 1 calc R U . . .
C27 C 0.1829(3) 0.13139(14) -0.0496(3) 0.0707(18) Uani 1 1 d . . . . .
H27 H 0.2155 0.1358 -0.0827 0.085 Uiso 1 1 calc R U . . .
C28 C 0.0947(2) 0.17362(11) 0.1005(3) 0.0423(11) Uani 1 1 d . . . . .
 
loop_
 _atom_site_aniso_label
 _atom_site_aniso_U_11
 _atom_site_aniso_U_22
 _atom_site_aniso_U_33
 _atom_site_aniso_U_23
 _atom_site_aniso_U_13
 _atom_site_aniso_U_12
Zr1 0.0362(3) 0.0134(2) 0.0206(3) -0.00015(17) 0.000 0.000
Zr2 0.0404(3) 0.0200(3) 0.0241(3) 0.000 -0.0079(2) 0.000
Zr3 0.0383(3) 0.0182(3) 0.0255(3) 0.000 0.0066(2) 0.000
O1 0.0567(19) 0.0258(15) 0.0308(15) 0.0041(13) -0.0068(14) 0.0071(14)
O2 0.077(2) 0.0260(17) 0.058(2) 0.0101(15) -0.0305(19) 0.0001(17)
O3 0.0530(18) 0.0245(15) 0.0330(15) -0.0055(13) 0.0087(14) 0.0063(14)
O4 0.068(2) 0.0259(17) 0.059(2) -0.0066(15) 0.0273(18) 0.0009(16)
O5 0.036(3) 0.052(3) 0.127(5) 0.062(3) 0.000 0.000
O6 0.038(3) 0.057(3) 0.123(5) -0.057(3) 0.000 0.000
O7 0.094(4) 0.076(4) 0.022(2) 0.000 -0.015(2) 0.000
O8 0.042(3) 0.056(3) 0.088(4) 0.000 -0.015(3) 0.000
O9 0.078(3) 0.042(3) 0.038(3) 0.000 0.011(2) 0.000
O10 0.037(3) 0.045(3) 0.101(4) 0.000 0.006(3) 0.000
O11 0.156(5) 0.047(2) 0.0238(17) -0.0016(15) -0.002(2) -0.052(3)
C1 0.060(3) 0.030(2) 0.040(3) 0.008(2) -0.015(2) 0.009(2)
C2 0.074(3) 0.032(3) 0.040(3) 0.010(2) -0.010(2) 0.010(2)
C3 0.120(6) 0.040(3) 0.071(4) 0.016(3) -0.052(4) 0.004(3)
C4 0.145(7) 0.036(3) 0.075(4) 0.018(3) -0.053(4) 0.003(4)
C5 0.094(4) 0.040(3) 0.042(3) 0.009(2) -0.020(3) 0.020(3)
C6 0.136(6) 0.040(3) 0.074(4) 0.006(3) -0.064(4) 0.017(4)
C7 0.121(6) 0.036(3) 0.071(4) 0.007(3) -0.051(4) 0.007(3)
C8 0.105(5) 0.041(3) 0.035(3) 0.005(2) -0.022(3) 0.026(3)
C9 0.256(12) 0.042(4) 0.103(6) 0.017(4) -0.119(7) 0.004(5)
C10 0.264(12) 0.038(4) 0.093(5) 0.004(3) -0.108(7) 0.028(5)
C11 0.127(5) 0.037(3) 0.025(2) 0.002(2) -0.010(3) 0.044(3)
C12 0.123(6) 0.049(3) 0.057(3) 0.016(3) -0.037(4) 0.020(4)
C13 0.120(6) 0.048(3) 0.065(4) 0.015(3) -0.032(4) 0.018(4)
C14 0.116(7) 0.036(4) 0.028(3) 0.000 0.000 0.045(4)
C15 0.117(7) 0.044(4) 0.023(3) 0.000 0.000 0.046(5)
C16 0.105(5) 0.049(3) 0.029(2) 0.002(2) 0.000(3) 0.042(3)
C17 0.093(5) 0.079(4) 0.056(3) -0.024(3) -0.006(3) 0.039(4)
C18 0.091(5) 0.070(4) 0.061(4) -0.027(3) -0.001(3) 0.028(4)
C19 0.088(4) 0.046(3) 0.042(3) -0.013(2) 0.006(3) 0.023(3)
C20 0.091(5) 0.071(4) 0.068(4) -0.022(4) 0.006(4) 0.033(4)
C21 0.109(5) 0.055(4) 0.059(3) -0.022(3) 0.001(4) 0.033(4)
C22 0.081(4) 0.044(3) 0.044(3) -0.008(2) 0.013(3) 0.018(3)
C23 0.097(5) 0.039(3) 0.076(4) -0.025(3) 0.023(4) -0.001(3)
C24 0.077(4) 0.042(3) 0.069(4) -0.017(3) 0.023(3) 0.001(3)
C25 0.063(3) 0.032(3) 0.046(3) -0.008(2) 0.014(2) 0.011(2)
C26 0.083(4) 0.043(3) 0.077(4) -0.021(3) 0.037(4) -0.004(3)
C27 0.094(5) 0.050(3) 0.067(4) -0.015(3) 0.036(3) 0.011(3)
C28 0.057(3) 0.028(2) 0.042(3) -0.011(2) 0.007(2) 0.006(2)
 
_geom_special_details
;
 All esds (except the esd in the dihedral angle between two l.s. planes)
 are estimated using the full covariance matrix.  The cell esds are taken
 into account individually in the estimation of esds in distances, angles
 and torsion angles; correlations between esds in cell parameters are only
 used when they are defined by crystal symmetry.  An approximate (isotropic)
 treatment of cell esds is used for estimating esds involving l.s. planes.
;
 
loop_
 _geom_bond_atom_site_label_1
 _geom_bond_atom_site_label_2
 _geom_bond_distance
 _geom_bond_site_symmetry_2
 _geom_bond_publ_flag
Zr1 O5 2.171(5) . ?
Zr1 O6 2.178(5) . ?
Zr1 O11 2.187(4) 11 ?
Zr1 O11 2.187(4) . ?
Zr1 O1 2.195(3) . ?
Zr1 O1 2.195(3) 11 ?
Zr1 O3 2.199(3) 11_554 ?
Zr1 O3 2.199(3) 1_554 ?
Zr1 Zr3 3.5090(5) 2 ?
Zr1 Zr3 3.5091(5) . ?
Zr1 Zr2 3.5101(5) . ?
Zr1 Zr2 3.5101(5) 2 ?
Zr2 O11 2.133(3) . ?
Zr2 O11 2.133(3) 12_565 ?
Zr2 O6 2.143(3) . ?
Zr2 O6 2.143(3) 2 ?
Zr2 O8 2.196(5) . ?
Zr2 O7 2.216(5) . ?
Zr2 O2 2.247(3) . ?
Zr2 O2 2.247(3) 12_565 ?
Zr2 Zr1 3.5101(5) 2 ?
Zr2 Zr3 3.5408(7) . ?
Zr2 Zr2 3.5536(10) 2 ?
Zr3 O11 2.127(3) . ?
Zr3 O11 2.127(3) 12_565 ?
Zr3 O5 2.152(3) . ?
Zr3 O5 2.152(3) 2 ?
Zr3 O10 2.175(5) . ?
Zr3 O9 2.203(5) . ?
Zr3 O4 2.272(3) 1_554 ?
Zr3 O4 2.272(3) 12_564 ?
Zr3 Zr1 3.5091(5) 2 ?
Zr3 Zr3 3.5585(10) 2 ?
O1 C1 1.266(6) . ?
O2 C1 1.260(6) . ?
O3 C28 1.263(6) . ?
O3 Zr1 2.198(3) 1_556 ?
O4 C28 1.267(6) . ?
O4 Zr3 2.272(3) 1_556 ?
O5 Zr3 2.151(3) 2 ?
O6 Zr2 2.144(3) 2 ?
C1 C2 1.505(6) . ?
C2 C3 1.362(8) . ?
C2 C7 1.373(7) . ?
C3 C4 1.374(7) . ?
C3 H3 0.9500 . ?
C4 C5 1.390(8) . ?
C4 H4 0.9500 . ?
C5 C6 1.361(8) . ?
C5 C8 1.502(6) . ?
C6 C7 1.370(7) . ?
C6 H6 0.9500 . ?
C7 H7 0.9500 . ?
C8 C13 1.359(8) . ?
C8 C9 1.364(9) . ?
C9 C10 1.379(8) . ?
C9 H9 0.9500 . ?
C10 C11 1.346(9) . ?
C10 H10 0.9500 . ?
C11 C12 1.351(9) . ?
C11 C14 1.502(6) . ?
C12 C13 1.394(7) . ?
C12 H12 0.9500 . ?
C13 H13 0.9500 . ?
C14 C15 1.352(9) . ?
C14 C11 1.502(6) 6_545 ?
C15 C16 1.499(6) . ?
C15 C16 1.499(6) 6_545 ?
C16 C21 1.360(9) . ?
C16 C17 1.381(9) . ?
C17 C18 1.370(8) . ?
C17 H17 0.9500 . ?
C18 C19 1.355(9) . ?
C18 H18 0.9500 . ?
C19 C20 1.387(9) . ?
C19 C22 1.491(7) . ?
C20 C21 1.396(8) . ?
C20 H20 0.9500 . ?
C21 H21 0.9500 . ?
C22 C23 1.378(8) . ?
C22 C27 1.387(8) . ?
C23 C24 1.384(7) . ?
C23 H23 0.9500 . ?
C24 C25 1.378(7) . ?
C24 H24 0.9500 . ?
C25 C26 1.371(7) . ?
C25 C28 1.492(6) . ?
C26 C27 1.377(7) . ?
C26 H26 0.9500 . ?
C27 H27 0.9500 . ?
 
loop_
 _geom_angle_atom_site_label_1
 _geom_angle_atom_site_label_2
 _geom_angle_atom_site_label_3
 _geom_angle
 _geom_angle_site_symmetry_1
 _geom_angle_site_symmetry_3
 _geom_angle_publ_flag
O5 Zr1 O6 109.9(3) . . ?
O5 Zr1 O11 70.53(13) . 11 ?
O6 Zr1 O11 70.49(13) . 11 ?
O5 Zr1 O11 70.53(13) . . ?
O6 Zr1 O11 70.49(13) . . ?
O11 Zr1 O11 109.0(3) 11 . ?
O5 Zr1 O1 142.52(9) . . ?
O6 Zr1 O1 78.19(16) . . ?
O11 Zr1 O1 142.14(12) 11 . ?
O11 Zr1 O1 78.76(14) . . ?
O5 Zr1 O1 142.52(9) . 11 ?
O6 Zr1 O1 78.19(16) . 11 ?
O11 Zr1 O1 78.76(14) 11 11 ?
O11 Zr1 O1 142.14(12) . 11 ?
O1 Zr1 O1 74.39(17) . 11 ?
O5 Zr1 O3 77.96(16) . 11_554 ?
O6 Zr1 O3 142.99(8) . 11_554 ?
O11 Zr1 O3 79.11(14) 11 11_554 ?
O11 Zr1 O3 141.76(11) . 11_554 ?
O1 Zr1 O3 118.29(12) . 11_554 ?
O1 Zr1 O3 75.55(12) 11 11_554 ?
O5 Zr1 O3 77.96(16) . 1_554 ?
O6 Zr1 O3 142.99(8) . 1_554 ?
O11 Zr1 O3 141.76(11) 11 1_554 ?
O11 Zr1 O3 79.11(14) . 1_554 ?
O1 Zr1 O3 75.55(12) . 1_554 ?
O1 Zr1 O3 118.28(12) 11 1_554 ?
O3 Zr1 O3 73.50(17) 11_554 1_554 ?
O5 Zr1 Zr3 35.54(9) . 2 ?
O6 Zr1 Zr3 90.51(16) . 2 ?
O11 Zr1 Zr3 34.99(10) 11 2 ?
O11 Zr1 Zr3 90.37(13) . 2 ?
O1 Zr1 Zr3 166.38(8) . 2 ?
O1 Zr1 Zr3 111.03(8) 11 2 ?
O3 Zr1 Zr3 75.33(8) 11_554 2 ?
O3 Zr1 Zr3 110.71(8) 1_554 2 ?
O5 Zr1 Zr3 35.54(9) . . ?
O6 Zr1 Zr3 90.52(16) . . ?
O11 Zr1 Zr3 90.37(13) 11 . ?
O11 Zr1 Zr3 35.00(10) . . ?
O1 Zr1 Zr3 111.03(8) . . ?
O1 Zr1 Zr3 166.38(8) 11 . ?
O3 Zr1 Zr3 110.71(8) 11_554 . ?
O3 Zr1 Zr3 75.33(8) 1_554 . ?
Zr3 Zr1 Zr3 60.935(17) 2 . ?
O5 Zr1 Zr2 90.75(16) . . ?
O6 Zr1 Zr2 35.36(9) . . ?
O11 Zr1 Zr2 90.38(13) 11 . ?
O11 Zr1 Zr2 35.15(10) . . ?
O1 Zr1 Zr2 75.11(8) . . ?
O1 Zr1 Zr2 110.80(8) 11 . ?
O3 Zr1 Zr2 166.59(8) 11_554 . ?
O3 Zr1 Zr2 111.53(8) 1_554 . ?
Zr3 Zr1 Zr2 91.275(13) 2 . ?
Zr3 Zr1 Zr2 60.589(12) . . ?
O5 Zr1 Zr2 90.75(16) . 2 ?
O6 Zr1 Zr2 35.36(9) . 2 ?
O11 Zr1 Zr2 35.15(10) 11 2 ?
O11 Zr1 Zr2 90.38(13) . 2 ?
O1 Zr1 Zr2 110.80(8) . 2 ?
O1 Zr1 Zr2 75.11(8) 11 2 ?
O3 Zr1 Zr2 111.53(8) 11_554 2 ?
O3 Zr1 Zr2 166.59(8) 1_554 2 ?
Zr3 Zr1 Zr2 60.588(12) 2 2 ?
Zr3 Zr1 Zr2 91.276(13) . 2 ?
Zr2 Zr1 Zr2 60.822(17) . 2 ?
O11 Zr2 O11 67.4(2) . 12_565 ?
O11 Zr2 O6 72.19(19) . . ?
O11 Zr2 O6 108.4(2) 12_565 . ?
O11 Zr2 O6 108.4(2) . 2 ?
O11 Zr2 O6 72.18(19) 12_565 2 ?
O6 Zr2 O6 68.0(2) . 2 ?
O11 Zr2 O8 87.9(2) . . ?
O11 Zr2 O8 87.9(2) 12_565 . ?
O6 Zr2 O8 145.93(12) . . ?
O6 Zr2 O8 145.93(12) 2 . ?
O11 Zr2 O7 146.08(10) . . ?
O11 Zr2 O7 146.08(10) 12_565 . ?
O6 Zr2 O7 86.5(2) . . ?
O6 Zr2 O7 86.5(2) 2 . ?
O8 Zr2 O7 96.4(2) . . ?
O11 Zr2 O2 77.37(14) . . ?
O11 Zr2 O2 140.88(14) 12_565 . ?
O6 Zr2 O2 74.89(18) . . ?
O6 Zr2 O2 137.86(15) 2 . ?
O8 Zr2 O2 73.90(12) . . ?
O7 Zr2 O2 71.68(11) . . ?
O11 Zr2 O2 140.88(14) . 12_565 ?
O11 Zr2 O2 77.37(14) 12_565 12_565 ?
O6 Zr2 O2 137.85(15) . 12_565 ?
O6 Zr2 O2 74.89(18) 2 12_565 ?
O8 Zr2 O2 73.90(12) . 12_565 ?
O7 Zr2 O2 71.69(11) . 12_565 ?
O2 Zr2 O2 127.22(17) . 12_565 ?
O11 Zr2 Zr1 88.22(13) . 2 ?
O11 Zr2 Zr1 36.18(12) 12_565 2 ?
O6 Zr2 Zr1 88.47(16) . 2 ?
O6 Zr2 Zr1 36.02(14) 2 2 ?
O8 Zr2 Zr1 119.00(9) . 2 ?
O7 Zr2 Zr1 117.92(10) . 2 ?
O2 Zr2 Zr1 160.60(9) . 2 ?
O2 Zr2 Zr1 71.98(8) 12_565 2 ?
O11 Zr2 Zr1 36.18(12) . . ?
O11 Zr2 Zr1 88.22(13) 12_565 . ?
O6 Zr2 Zr1 36.02(14) . . ?
O6 Zr2 Zr1 88.47(16) 2 . ?
O8 Zr2 Zr1 119.00(9) . . ?
O7 Zr2 Zr1 117.92(10) . . ?
O2 Zr2 Zr1 71.99(8) . . ?
O2 Zr2 Zr1 160.60(9) 12_565 . ?
Zr1 Zr2 Zr1 88.709(16) 2 . ?
O11 Zr2 Zr3 33.72(10) . . ?
O11 Zr2 Zr3 33.72(10) 12_565 . ?
O6 Zr2 Zr3 90.24(18) . . ?
O6 Zr2 Zr3 90.24(18) 2 . ?
O8 Zr2 Zr3 87.59(15) . . ?
O7 Zr2 Zr3 176.02(16) . . ?
O2 Zr2 Zr3 109.59(9) . . ?
O2 Zr2 Zr3 109.59(9) 12_565 . ?
Zr1 Zr2 Zr3 59.692(10) 2 . ?
Zr1 Zr2 Zr3 59.691(10) . . ?
O11 Zr2 Zr2 90.10(15) . 2 ?
O11 Zr2 Zr2 90.10(15) 12_565 2 ?
O6 Zr2 Zr2 34.01(12) . 2 ?
O6 Zr2 Zr2 34.01(12) 2 2 ?
O8 Zr2 Zr2 177.63(15) . 2 ?
O7 Zr2 Zr2 85.97(16) . 2 ?
O2 Zr2 Zr2 106.95(10) . 2 ?
O2 Zr2 Zr2 106.95(10) 12_565 2 ?
Zr1 Zr2 Zr2 59.590(8) 2 2 ?
Zr1 Zr2 Zr2 59.590(8) . 2 ?
Zr3 Zr2 Zr2 90.041(11) . 2 ?
O11 Zr3 O11 67.7(2) . 12_565 ?
O11 Zr3 O5 72.05(18) . . ?
O11 Zr3 O5 108.5(2) 12_565 . ?
O11 Zr3 O5 108.5(2) . 2 ?
O11 Zr3 O5 72.04(18) 12_565 2 ?
O5 Zr3 O5 68.4(2) . 2 ?
O11 Zr3 O10 89.1(2) . . ?
O11 Zr3 O10 89.1(2) 12_565 . ?
O5 Zr3 O10 145.79(11) . . ?
O5 Zr3 O10 145.78(12) 2 . ?
O11 Zr3 O9 145.96(10) . . ?
O11 Zr3 O9 145.96(10) 12_565 . ?
O5 Zr3 O9 86.4(2) . . ?
O5 Zr3 O9 86.4(2) 2 . ?
O10 Zr3 O9 95.1(2) . . ?
O11 Zr3 O4 77.00(14) . 1_554 ?
O11 Zr3 O4 140.62(14) 12_565 1_554 ?
O5 Zr3 O4 74.91(17) . 1_554 ?
O5 Zr3 O4 138.36(14) 2 1_554 ?
O10 Zr3 O4 73.12(11) . 1_554 ?
O9 Zr3 O4 72.05(10) . 1_554 ?
O11 Zr3 O4 140.62(14) . 12_564 ?
O11 Zr3 O4 77.00(14) 12_565 12_564 ?
O5 Zr3 O4 138.36(14) . 12_564 ?
O5 Zr3 O4 74.91(17) 2 12_564 ?
O10 Zr3 O4 73.12(11) . 12_564 ?
O9 Zr3 O4 72.05(11) . 12_564 ?
O4 Zr3 O4 127.32(16) 1_554 12_564 ?
O11 Zr3 Zr1 36.14(12) . . ?
O11 Zr3 Zr1 88.34(13) 12_565 . ?
O5 Zr3 Zr1 35.91(14) . . ?
O5 Zr3 Zr1 88.65(16) 2 . ?
O10 Zr3 Zr1 119.85(10) . . ?
O9 Zr3 Zr1 117.82(9) . . ?
O4 Zr3 Zr1 71.94(8) 1_554 . ?
O4 Zr3 Zr1 160.62(8) 12_564 . ?
O11 Zr3 Zr1 88.34(13) . 2 ?
O11 Zr3 Zr1 36.14(12) 12_565 2 ?
O5 Zr3 Zr1 88.65(16) . 2 ?
O5 Zr3 Zr1 35.91(14) 2 2 ?
O10 Zr3 Zr1 119.85(10) . 2 ?
O9 Zr3 Zr1 117.82(9) . 2 ?
O4 Zr3 Zr1 160.62(8) 1_554 2 ?
O4 Zr3 Zr1 71.94(8) 12_564 2 ?
Zr1 Zr3 Zr1 88.740(16) . 2 ?
O11 Zr3 Zr2 33.83(10) . . ?
O11 Zr3 Zr2 33.83(10) 12_565 . ?
O5 Zr3 Zr2 90.26(18) . . ?
O5 Zr3 Zr2 90.26(18) 2 . ?
O10 Zr3 Zr2 88.99(16) . . ?
O9 Zr3 Zr2 175.90(14) . . ?
O4 Zr3 Zr2 109.29(9) 1_554 . ?
O4 Zr3 Zr2 109.29(9) 12_564 . ?
Zr1 Zr3 Zr2 59.719(11) . . ?
Zr1 Zr3 Zr2 59.719(11) 2 . ?
O11 Zr3 Zr3 90.04(15) . 2 ?
O11 Zr3 Zr3 90.04(15) 12_565 2 ?
O5 Zr3 Zr3 34.21(12) . 2 ?
O5 Zr3 Zr3 34.21(12) 2 2 ?
O10 Zr3 Zr3 178.95(16) . 2 ?
O9 Zr3 Zr3 85.94(14) . 2 ?
O4 Zr3 Zr3 107.25(9) 1_554 2 ?
O4 Zr3 Zr3 107.25(9) 12_564 2 ?
Zr1 Zr3 Zr3 59.532(8) . 2 ?
Zr1 Zr3 Zr3 59.532(8) 2 2 ?
Zr2 Zr3 Zr3 89.959(11) . 2 ?
C1 O1 Zr1 131.3(3) . . ?
C1 O2 Zr2 134.0(3) . . ?
C28 O3 Zr1 132.3(3) . 1_556 ?
C28 O4 Zr3 134.0(3) . 1_556 ?
Zr3 O5 Zr3 111.6(2) 2 . ?
Zr3 O5 Zr1 108.5(2) 2 . ?
Zr3 O5 Zr1 108.5(2) . . ?
Zr2 O6 Zr2 112.0(2) . 2 ?
Zr2 O6 Zr1 108.6(2) . . ?
Zr2 O6 Zr1 108.6(2) 2 . ?
Zr3 O11 Zr2 112.45(18) . . ?
Zr3 O11 Zr1 108.86(19) . . ?
Zr2 O11 Zr1 108.68(19) . . ?
O2 C1 O1 126.1(4) . . ?
O2 C1 C2 117.9(4) . . ?
O1 C1 C2 116.0(4) . . ?
C3 C2 C7 118.3(5) . . ?
C3 C2 C1 121.0(5) . . ?
C7 C2 C1 120.7(5) . . ?
C2 C3 C4 121.0(6) . . ?
C2 C3 H3 119.5 . . ?
C4 C3 H3 119.5 . . ?
C3 C4 C5 120.6(6) . . ?
C3 C4 H4 119.7 . . ?
C5 C4 H4 119.7 . . ?
C6 C5 C4 117.8(5) . . ?
C6 C5 C8 122.3(5) . . ?
C4 C5 C8 119.9(5) . . ?
C5 C6 C7 121.4(5) . . ?
C5 C6 H6 119.3 . . ?
C7 C6 H6 119.3 . . ?
C6 C7 C2 120.9(5) . . ?
C6 C7 H7 119.6 . . ?
C2 C7 H7 119.6 . . ?
C13 C8 C9 116.8(5) . . ?
C13 C8 C5 121.5(5) . . ?
C9 C8 C5 121.7(5) . . ?
C8 C9 C10 120.8(7) . . ?
C8 C9 H9 119.6 . . ?
C10 C9 H9 119.6 . . ?
C11 C10 C9 122.7(7) . . ?
C11 C10 H10 118.7 . . ?
C9 C10 H10 118.7 . . ?
C10 C11 C12 116.7(5) . . ?
C10 C11 C14 119.9(5) . . ?
C12 C11 C14 123.3(5) . . ?
C11 C12 C13 121.4(6) . . ?
C11 C12 H12 119.3 . . ?
C13 C12 H12 119.3 . . ?
C8 C13 C12 121.4(6) . . ?
C8 C13 H13 119.3 . . ?
C12 C13 H13 119.3 . . ?
C15 C14 C11 122.5(3) . 6_545 ?
C15 C14 C11 122.5(3) . . ?
C11 C14 C11 115.0(6) 6_545 . ?
C14 C15 C16 122.6(3) . . ?
C14 C15 C16 122.6(3) . 6_545 ?
C16 C15 C16 114.9(5) . 6_545 ?
C21 C16 C17 118.4(5) . . ?
C21 C16 C15 121.9(5) . . ?
C17 C16 C15 119.6(5) . . ?
C18 C17 C16 121.4(6) . . ?
C18 C17 H17 119.3 . . ?
C16 C17 H17 119.3 . . ?
C19 C18 C17 120.9(7) . . ?
C19 C18 H18 119.5 . . ?
C17 C18 H18 119.5 . . ?
C18 C19 C20 118.2(5) . . ?
C18 C19 C22 120.4(6) . . ?
C20 C19 C22 121.3(6) . . ?
C19 C20 C21 120.9(7) . . ?
C19 C20 H20 119.6 . . ?
C21 C20 H20 119.6 . . ?
C16 C21 C20 120.0(7) . . ?
C16 C21 H21 120.0 . . ?
C20 C21 H21 120.0 . . ?
C23 C22 C27 117.8(5) . . ?
C23 C22 C19 121.4(5) . . ?
C27 C22 C19 120.8(5) . . ?
C22 C23 C24 121.4(6) . . ?
C22 C23 H23 119.3 . . ?
C24 C23 H23 119.3 . . ?
C25 C24 C23 119.9(5) . . ?
C25 C24 H24 120.1 . . ?
C23 C24 H24 120.1 . . ?
C26 C25 C24 119.3(5) . . ?
C26 C25 C28 121.0(5) . . ?
C24 C25 C28 119.7(5) . . ?
C25 C26 C27 120.6(5) . . ?
C25 C26 H26 119.7 . . ?
C27 C26 H26 119.7 . . ?
C26 C27 C22 121.0(5) . . ?
C26 C27 H27 119.5 . . ?
C22 C27 H27 119.5 . . ?
O3 C28 O4 125.4(4) . . ?
O3 C28 C25 117.5(4) . . ?
O4 C28 C25 117.1(4) . . ?
 
loop_
 _geom_torsion_atom_site_label_1
 _geom_torsion_atom_site_label_2
 _geom_torsion_atom_site_label_3
 _geom_torsion_atom_site_label_4
 _geom_torsion
 _geom_torsion_site_symmetry_1
 _geom_torsion_site_symmetry_2
 _geom_torsion_site_symmetry_3
 _geom_torsion_site_symmetry_4
 _geom_torsion_publ_flag
Zr2 O2 C1 O1 13.8(9) . . . . ?
Zr2 O2 C1 C2 -166.5(4) . . . . ?
Zr1 O1 C1 O2 -16.6(8) . . . . ?
Zr1 O1 C1 C2 163.7(3) . . . . ?
O2 C1 C2 C3 178.0(6) . . . . ?
O1 C1 C2 C3 -2.2(9) . . . . ?
O2 C1 C2 C7 0.1(9) . . . . ?
O1 C1 C2 C7 179.9(6) . . . . ?
C7 C2 C3 C4 -2.2(11) . . . . ?
C1 C2 C3 C4 179.9(7) . . . . ?
C2 C3 C4 C5 1.3(13) . . . . ?
C3 C4 C5 C6 1.0(12) . . . . ?
C3 C4 C5 C8 -177.6(7) . . . . ?
C4 C5 C6 C7 -2.3(12) . . . . ?
C8 C5 C6 C7 176.2(7) . . . . ?
C5 C6 C7 C2 1.4(13) . . . . ?
C3 C2 C7 C6 0.8(11) . . . . ?
C1 C2 C7 C6 178.8(7) . . . . ?
C6 C5 C8 C13 -7.0(11) . . . . ?
C4 C5 C8 C13 171.5(7) . . . . ?
C6 C5 C8 C9 175.0(9) . . . . ?
C4 C5 C8 C9 -6.5(11) . . . . ?
C13 C8 C9 C10 -3.1(15) . . . . ?
C5 C8 C9 C10 175.0(9) . . . . ?
C8 C9 C10 C11 5.2(18) . . . . ?
C9 C10 C11 C12 -4.6(15) . . . . ?
C9 C10 C11 C14 178.6(9) . . . . ?
C10 C11 C12 C13 2.3(12) . . . . ?
C14 C11 C12 C13 178.9(6) . . . . ?
C9 C8 C13 C12 0.8(12) . . . . ?
C5 C8 C13 C12 -177.2(7) . . . . ?
C11 C12 C13 C8 -0.5(12) . . . . ?
C10 C11 C14 C15 -127.9(7) . . . . ?
C12 C11 C14 C15 55.6(7) . . . . ?
C10 C11 C14 C11 52.1(7) . . . 6_545 ?
C12 C11 C14 C11 -124.4(7) . . . 6_545 ?
C11 C14 C15 C16 -178.3(4) 6_545 . . . ?
C11 C14 C15 C16 1.7(4) . . . . ?
C11 C14 C15 C16 1.7(4) 6_545 . . 6_545 ?
C11 C14 C15 C16 -178.3(4) . . . 6_545 ?
C14 C15 C16 C21 66.5(6) . . . . ?
C16 C15 C16 C21 -113.5(6) 6_545 . . . ?
C14 C15 C16 C17 -114.6(5) . . . . ?
C16 C15 C16 C17 65.4(5) 6_545 . . . ?
C21 C16 C17 C18 -2.1(10) . . . . ?
C15 C16 C17 C18 178.9(6) . . . . ?
C16 C17 C18 C19 4.0(10) . . . . ?
C17 C18 C19 C20 -2.8(10) . . . . ?
C17 C18 C19 C22 175.1(6) . . . . ?
C18 C19 C20 C21 -0.2(10) . . . . ?
C22 C19 C20 C21 -178.0(6) . . . . ?
C17 C16 C21 C20 -0.8(10) . . . . ?
C15 C16 C21 C20 178.2(6) . . . . ?
C19 C20 C21 C16 2.0(10) . . . . ?
C18 C19 C22 C23 -129.3(7) . . . . ?
C20 C19 C22 C23 48.5(9) . . . . ?
C18 C19 C22 C27 47.9(9) . . . . ?
C20 C19 C22 C27 -134.3(7) . . . . ?
C27 C22 C23 C24 -2.7(10) . . . . ?
C19 C22 C23 C24 174.5(6) . . . . ?
C22 C23 C24 C25 3.5(11) . . . . ?
C23 C24 C25 C26 -2.0(10) . . . . ?
C23 C24 C25 C28 177.7(6) . . . . ?
C24 C25 C26 C27 -0.2(10) . . . . ?
C28 C25 C26 C27 -179.9(6) . . . . ?
C25 C26 C27 C22 0.9(11) . . . . ?
C23 C22 C27 C26 0.5(10) . . . . ?
C19 C22 C27 C26 -176.8(6) . . . . ?
Zr1 O3 C28 O4 13.1(8) 1_556 . . . ?
Zr1 O3 C28 C25 -164.7(3) 1_556 . . . ?
Zr3 O4 C28 O3 -12.0(8) 1_556 . . . ?
Zr3 O4 C28 C25 165.9(3) 1_556 . . . ?
C26 C25 C28 O3 -167.6(5) . . . . ?
C24 C25 C28 O3 12.7(8) . . . . ?
C26 C25 C28 O4 14.4(8) . . . . ?
C24 C25 C28 O4 -165.3(5) . . . . ?
 
_refine_diff_density_max    1.587
_refine_diff_density_min   -1.223
_refine_diff_density_rms    0.094

_shelx_res_file
;

    F:\xray\ccx3\LIFM-1~4\114-MeOH\1_sq.res created by SHELXL-2014/7

TITL exp_1999 in Cmme                 New: Cmma
CELL 1.54184 22.0159 42.2419 17.8711 90.000 90.000 90.000
ZERR 4.0000 0.0012 0.0014 0.0005 0.000 0.000 0.000
LATT 7
SYMM -X, 0.5-Y, Z
SYMM X, -Y, -Z
SYMM -X, 0.5+Y, -Z
SFAC C H N O ZR
UNIT 432 256 0 128 24
MERG 2
FMAP 2
GRID
PLAN -20
TEMP -100
BOND $H
CONF
ABIN
ISOR 0.01 O6
L.S. 20
ACTA
WGHT    0.084000   55.975002
FVAR       1.00138
ZR1   5    0.000000    0.191909   -0.771605    10.50000    0.03619    0.01338 =
         0.02057   -0.00015    0.00000    0.00000
ZR2   5    0.080704    0.250000   -0.672415    10.50000    0.04040    0.02001 =
         0.02408    0.00000   -0.00787    0.00000
ZR3   5    0.080817    0.250000   -0.870543    10.50000    0.03827    0.01820 =
         0.02551    0.00000    0.00661    0.00000
O1    4    0.060277    0.165339   -0.696582    11.00000    0.05671    0.02578 =
         0.03078    0.00406   -0.00681    0.00712
O2    4    0.110454    0.202349   -0.630225    11.00000    0.07739    0.02603 =
         0.05789    0.01009   -0.03050    0.00007
O3    4    0.059746    0.165137    0.152822    11.00000    0.05301    0.02450 =
         0.03296   -0.00546    0.00865    0.00626
O4    4    0.111414    0.201800    0.087491    11.00000    0.06838    0.02589 =
         0.05916   -0.00665    0.02732    0.00091
O5    4    0.000000    0.221365   -0.871154    10.50000    0.03561    0.05183 =
         0.12744    0.06213    0.00000    0.00000
O6    4    0.000000    0.221618   -0.671974    10.50000    0.03822    0.05676 =
         0.12298   -0.05672    0.00000    0.00000
O7    4    0.073638    0.250000   -0.548722    10.50000    0.09399    0.07633 =
         0.02157    0.00000   -0.01528    0.00000
O8    4    0.180352    0.250000   -0.677500    10.50000    0.04244    0.05593 =
         0.08758    0.00000   -0.01522    0.00000
O9    4    0.073730    0.250000   -0.993528    10.50000    0.07778    0.04221 =
         0.03750    0.00000    0.01066    0.00000
O10   4    0.179593    0.250000   -0.868321    10.50000    0.03715    0.04540 =
         0.10081    0.00000    0.00615    0.00000
O11   4    0.080880    0.221971   -0.771690    11.00000    0.15613    0.04672 =
         0.02377   -0.00165   -0.00212   -0.05247
C1    1    0.093780    0.174330   -0.643086    11.00000    0.05995    0.02992 =
         0.03980    0.00811   -0.01459    0.00916
C2    1    0.115408    0.148775   -0.590786    11.00000    0.07367    0.03161 =
         0.03954    0.01026   -0.01018    0.01038
C3    1    0.097603    0.118136   -0.600071    11.00000    0.12044    0.03976 =
         0.07143    0.01640   -0.05152    0.00422
AFIX  43
H3    2    0.071089    0.112837   -0.640097    11.00000   -1.20000
AFIX   0
C4    1    0.117404    0.094785   -0.552440    11.00000    0.14498    0.03552 =
         0.07530    0.01783   -0.05346    0.00273
AFIX  43
H4    2    0.105113    0.073497   -0.560484    11.00000   -1.20000
AFIX   0
C5    1    0.155259    0.102024   -0.492582    11.00000    0.09378    0.04026 =
         0.04183    0.00866   -0.01956    0.01959
C6    1    0.170989    0.132877   -0.482462    11.00000    0.13577    0.04033 =
         0.07414    0.00607   -0.06371    0.01673
AFIX  43
H6    2    0.195584    0.138525   -0.440874    11.00000   -1.20000
AFIX   0
C7    1    0.152093    0.155971   -0.531009    11.00000    0.12124    0.03581 =
         0.07092    0.00691   -0.05061    0.00713
AFIX  43
H7    2    0.164539    0.177250   -0.523211    11.00000   -1.20000
AFIX   0
C8    1    0.178507    0.076059   -0.442843    11.00000    0.10550    0.04093 =
         0.03534    0.00501   -0.02184    0.02627
C9    1    0.158871    0.045580   -0.450072    11.00000    0.25582    0.04153 =
         0.10273    0.01735   -0.11879    0.00410
AFIX  43
H9    2    0.127436    0.040781   -0.484677    11.00000   -1.20000
AFIX   0
C10   1    0.184087    0.021657   -0.407774    11.00000    0.26367    0.03817 =
         0.09280    0.00431   -0.10762    0.02809
AFIX  43
H10   2    0.171802    0.000463   -0.417113    11.00000   -1.20000
AFIX   0
C11   1    0.225401    0.027114   -0.353793    11.00000    0.12715    0.03744 =
         0.02455    0.00247   -0.00978    0.04415
C12   1    0.244870    0.057269   -0.345969    11.00000    0.12318    0.04949 =
         0.05673    0.01648   -0.03711    0.02024
AFIX  43
H12   2    0.275139    0.061950   -0.309734    11.00000   -1.20000
AFIX   0
C13   1    0.221496    0.081654   -0.389923    11.00000    0.11973    0.04812 =
         0.06458    0.01530   -0.03249    0.01769
AFIX  43
H13   2    0.235928    0.102629   -0.382726    11.00000   -1.20000
AFIX   0
C14   1    0.250000    0.000000   -0.308631    10.50000    0.11555    0.03578 =
         0.02786    0.00000    0.00000    0.04469
C15   1    0.250000    0.000000   -0.232959    10.50000    0.11734    0.04391 =
         0.02343    0.00000    0.00000    0.04553
C16   1    0.223943    0.026655   -0.187791    11.00000    0.10485    0.04901 =
         0.02916    0.00232    0.00014    0.04213
C17   1    0.261792    0.044856   -0.143719    11.00000    0.09324    0.07852 =
         0.05611   -0.02448   -0.00590    0.03880
AFIX  43
H17   2    0.303903    0.040012   -0.141851    11.00000   -1.20000
AFIX   0
C18   1    0.239939    0.069755   -0.102612    11.00000    0.09100    0.06970 =
         0.06051   -0.02710   -0.00058    0.02824
AFIX  43
H18   2    0.267432    0.082690   -0.075337    11.00000   -1.20000
AFIX   0
C19   1    0.179683    0.076192   -0.100308    11.00000    0.08822    0.04636 =
         0.04214   -0.01262    0.00585    0.02267
C20   1    0.140954    0.057756   -0.143257    11.00000    0.09052    0.07060 =
         0.06769   -0.02232    0.00644    0.03320
AFIX  43
H20   2    0.098523    0.061827   -0.142341    11.00000   -1.20000
AFIX   0
C21   1    0.163505    0.033282   -0.187839    11.00000    0.10927    0.05517 =
         0.05864   -0.02188    0.00109    0.03338
AFIX  43
H21   2    0.136621    0.021264   -0.218201    11.00000   -1.20000
AFIX   0
C22   1    0.155916    0.101714   -0.050632    11.00000    0.08145    0.04441 =
         0.04391   -0.00839    0.01260    0.01800
C23   1    0.108355    0.096317   -0.002119    11.00000    0.09727    0.03920 =
         0.07587   -0.02481    0.02337   -0.00113
AFIX  43
H23   2    0.088003    0.076493   -0.003353    11.00000   -1.20000
AFIX   0
C24   1    0.089621    0.119177    0.048364    11.00000    0.07715    0.04166 =
         0.06922   -0.01695    0.02284    0.00133
AFIX  43
H24   2    0.058251    0.114576    0.083209    11.00000   -1.20000
AFIX   0
C25   1    0.116581    0.148627    0.047962    11.00000    0.06273    0.03240 =
         0.04551   -0.00806    0.01403    0.01082
C26   1    0.163051    0.154536   -0.001156    11.00000    0.08313    0.04283 =
         0.07747   -0.02087    0.03691   -0.00377
AFIX  43
H26   2    0.181745    0.174804   -0.001799    11.00000   -1.20000
AFIX   0
C27   1    0.182888    0.131388   -0.049553    11.00000    0.09443    0.05039 =
         0.06719   -0.01484    0.03629    0.01062
AFIX  43
H27   2    0.215536    0.135801   -0.082709    11.00000   -1.20000
AFIX   0
C28   1    0.094709    0.173617    0.100489    11.00000    0.05660    0.02797 =
         0.04241   -0.01112    0.00656    0.00632
HKLF 4  1  0.0000 1.0000 0.0000 1.0000 0.0000 0.0000 0.0000 0.0000 -1.0000

REM  exp_1999 in Cmme                 New: Cmma
REM R1 =  0.0507 for    5798 Fo > 4sig(Fo)  and  0.0594 for all    7162 data
REM    344 parameters refined using      6 restraints

END

WGHT      0.0834     55.8285

REM Highest difference peak  1.587,  deepest hole -1.223,  1-sigma level  0.094
Q1    1   0.0797  0.2500 -0.9381  10.50000  0.05    1.59
Q2    1   0.0000  0.1910 -0.8395  10.50000  0.05    1.40
Q3    1   0.0997  0.2500 -1.0469  10.50000  0.05    1.36
Q4    1   0.0842  0.2500 -0.7427  10.50000  0.05    1.26
Q5    1   0.1113  0.2500 -0.4970  10.50000  0.05    0.81
Q6    1   0.0682  0.2334 -0.5039  11.00000  0.05    0.73
Q7    1   0.0840  0.2500 -0.8175  10.50000  0.05    0.70
Q8    1   0.0000  0.1883 -0.7200  10.50000  0.05    0.70
Q9    1   0.0806  0.2387 -0.6003  11.00000  0.05    0.69
Q10   1   0.2225  0.2500 -0.9104  10.50000  0.05    0.67
Q11   1   0.2219  0.2332 -0.6874  11.00000  0.05    0.65
Q12   1   0.0000  0.2159 -0.6383  10.50000  0.05    0.64
Q13   1   0.0000  0.2057 -0.6983  10.50000  0.05    0.62
Q14   1   0.0711  0.2364 -0.8003  11.00000  0.05    0.61
Q15   1   0.0000  0.2133 -0.8930  10.50000  0.05    0.60
Q16   1   0.0000  0.2204 -0.8324  10.50000  0.05    0.51
Q17   1   0.0208  0.2500 -0.7365  10.50000  0.05    0.45
Q18   1   0.0000  0.2222 -0.7071  10.50000  0.05    0.45
Q19   1   0.0786  0.2311 -0.9960  11.00000  0.05    0.44
Q20   1   0.1811  0.2500 -0.8106  10.50000  0.05    0.42
;
_shelx_res_checksum   32946

_shelx_hkl_file
;
   0   0   2 51105.9 460.905   1
   0   0   3 1889.41 113.564   1
   0   0   4 75890.7 783.692   1
   0   0   5 36731.1 600.167   1
   0   0   6 27025.6 570.215   1
   0   0   7 14516.1 445.806   1
   0   0   8 59052.9 934.195   1
   0   0  10 17385.4 823.080   2
   0   0  11 262696. 3355.89   2
   0   0  12 1682.27 333.850   2
   0   0  13 38284.4 1404.81   2
   0   0  14-575.654 324.428   2
   0   0  15-341.352 330.379   2
   0   0  16 495.806 245.423   2
   0   0  17 5113.88 592.677   2
   0   0  18 21281.6 1077.83   2
   0   0  19 12428.0 777.066   2
   0  -2   3 6829.48 281.135   1
   0  -2   4 35386.0 699.699   1
   0  -2   5 6837.43 349.280   1
   0  -2   6 2618.71 248.230   1
   0  -2   7 2238.86 243.816   1
   0  -2   8 8922.89 484.215   1
   0  -2   9 84900.8 1522.27   1
   0   2  10 8522.04 634.742   4
   0   2  10 7027.83 528.076   2
   0  -2  11 120855. 2283.49   2
   0   2  11 119682. 2256.57   2
   0  -2  12 6.29246 195.561   2
   0   2  12 583.812 243.677   2
   0  -2  13 49146.8 1610.13   2
   0   2  13 47743.5 1562.44   2
   0  -2  14 1713.17 330.598   2
   0   2  14 1364.15 270.076   2
   0  -2  15 1398.15 313.066   2
   0   2  15 860.992 198.518   2
   0   2  16 702.570 289.492   2
   0  -2  16 874.468 260.329   2
   0  -2  17 1185.93 318.318   2
   0   2  17 994.931 327.551   2
   0   2  18 14288.4 942.679   2
   0  -2  18 12686.2 771.379   2
   0   2  19 4997.41 547.582   2
   0  -4   3 37023.8 778.408   1
   0  -4   4 6808.32 364.402   1
   0  -4   5 6354.97 385.406   1
   0  -4   6 20778.1 739.440   1
   0  -4   7 47514.3 1204.32   1
   0  -4   8 6076.74 474.465   1
   0   4   9 11062.4 622.888   2
   0  -4   9 12050.6 693.274   1
   0   4   9 11614.6 661.763   4
   0  -4  10 615.951 201.648   1
   0   4  10 813.986 242.872   4
   0   4  10 417.505 165.664   2
   0  -4  11 9277.64 649.620   2
   0   4  11 10882.5 735.849   4
   0   4  11 10708.9 691.431   2
   0  -4  12 5.13569 146.384   2
   0   4  12 505.938 261.476   2
   0  -4  13 17371.2 960.242   2
   0   4  13 16060.3 945.522   2
   0  -4  14 2908.52 426.836   2
   0   4  14 2267.60 336.039   2
   0   4  15 54295.4 1825.67   2
   0   4  16 20095.0 1185.64   2
   0   4  17 14734.9 1008.66   2
   0   4  18 1689.16 371.800   2
   0   4  19 4595.80 531.660   2
   0  -6   4 474313. 3477.73   1
   0  -6   5 71757.2 1433.64   1
   0  -6   6 74748.1 1562.33   1
   0  -6   7 54543.1 1439.82   1
   0  -6   8 1483.32 277.584   1
   0   6   9 19860.2 862.061   2
   0   6   9 20691.1 900.380   4
   0  -6   9 21342.6 1033.58   1
   0   6  10 1214.40 261.884   4
   0   6  10 1145.51 247.811   2
   0  -6  10 1402.79 307.671   1
   0  -6  11 2579.20 400.998   1
   0   6  11 3015.23 387.251   2
   0   6  11 2830.95 402.547   4
   0   6  12 240.180 235.587   4
   0   6  12 187.162 242.734   2
   0   6  13 15217.4 908.639   2
   0   6  13 16985.5 1026.62   4
   0   6  14 4894.01 565.164   2
   0   6  15 67646.0 2105.14   2
   0   6  16 17053.8 1047.80   2
   0   6  17 12413.3 928.585   2
   0   6  18 6411.22 633.007   2
   0   6  19 855.263 304.401   2
   0  -8   3 342.229 141.218   1
   0  -8   4 9386.56 576.019   1
   0  -8   5 58295.0 1459.65   1
   0  -8   6 115304. 2170.57   1
   0   8   7 121990. 2011.31   4
   0  -8   7 126980. 2413.86   1
   0   8   8 22905.4 925.006   4
   0  -8   8 21630.5 1069.08   1
   0   8   8 20579.4 865.137   2
   0   8   9 14.6686 148.049   4
   0  -8   9 180.753 172.779   1
   0   8   9-68.0688 176.918   2
   0   8  10 104.755 152.985   2
   0   8  10 274.469 175.156   4
   0  -8  10 174.676 232.320   1
   0   8  11 718.833 237.465   4
   0   8  11 1209.61 280.022   2
   0  -8  11 656.891 278.051   1
   0   8  12 167.092 228.068   4
   0   8  12 103.720 227.457   2
   0   8  13 11748.0 813.602   2
   0   8  13 12349.9 891.632   4
   0   8  14 6773.41 661.879   2
   0   8  15 52674.0 1833.73   2
   0   8  16 18915.0 1190.90   2
   0   8  17 14279.4 946.787   2
   0   8  18 403.651 257.561   2
   0   8  19 721.397 250.983   2
   0 -10   2 24432.8 970.963   1
   0 -10   3 10659.2 675.731   1
   0 -10   4 3.67904 196.744   1
   0 -10   5 13045.8 802.602   1
   0  10   6 53969.2 1397.95   4
   0 -10   6 53470.7 1664.36   1
   0  10   7 47651.4 1353.65   4
   0 -10   7 48597.1 1671.15   1
   0  10   8 14894.6 797.097   4
   0 -10   8 15298.6 1007.16   1
   0  10   8 13458.7 743.813   2
   0  10   9 61107.2 1619.49   2
   0  10   9 59370.0 1666.16   4
   0 -10   9 59632.7 2072.46   1
   0 -10  10 1571.79 444.193   1
   0  10  10 1674.33 360.444   4
   0  10  10 2139.17 381.154   2
   0 -10  11 40342.3 1883.28   1
   0  10  11 43160.7 1577.85   4
   0  10  11 43035.7 1497.59   2
   0  10  12 116.578 231.852   4
   0  10  12-231.935 294.616   2
   0  10  13 8198.76 760.086   4
   0  10  13 7500.63 689.364   2
   0  10  14-1088.33 328.796   2
   0  10  14 743.409 397.563   4
   0  10  15 2722.17 435.196   2
   0  10  16 1248.16 316.229   2
   0  10  17 1157.63 324.348   2
   0  10  18 5684.02 538.322   2
   0  10  19 4514.29 434.182   2
   0 -12   0 782446. 6107.91   1
   0 -12  -1 13120.9 798.684   1
   0 -12   1 13066.0 832.838   1
   0 -12   2 35457.7 1352.30   1
   0 -12  -2 33967.0 1224.55   1
   0 -12   3 3454.08 462.809   1
   0 -12  -3 3610.01 395.917   1
   0  12   3 3598.70 353.082   4
   0 -12   4 2213.22 400.052   1
   0  12   4 1917.04 267.114   4
   0 -12  -4 1928.24 303.095   1
   0 -12   5 23203.1 1200.85   1
   0  12   5 21856.2 937.020   4
   0  12   6 15326.1 811.796   4
   0 -12   6 15931.7 1045.83   1
   0 -12   7 2868.79 526.930   1
   0  12   7 1782.52 265.508   4
   0  12   8 16236.3 827.202   2
   0 -12   8 19094.3 1253.47   1
   0  12   8 17121.1 917.102   4
   0 -12   9 156518. 3709.33   1
   0  12   9 162848. 2857.33   4
   0  12   9 154321. 2624.91   2
   0  12  10 6421.25 576.887   2
   0  12  10 8176.43 714.968   4
   0 -12  10 6843.88 873.216   1
   0  12  11 114276. 2455.64   2
   0  12  11 115490. 2615.65   4
   0  12  12 739.026 283.271   4
   0  12  12 376.887 189.880   2
   0  12  13 4581.17 577.810   4
   0  12  13 4467.90 520.995   2
   0  12  14 217.248 202.109   2
   0  12  14 621.957 350.696   4
   0  12  15 4869.79 552.814   2
   0  12  16 1036.95 272.352   2
   0  12  17 1680.45 346.326   2
   0  12  18 12908.9 697.016   2
   0 -14   0 70359.2 2118.07   1
   0 -14   1 339.500 255.722   1
   0 -14  -1-196.491 241.215   1
   0 -14   2 88531.9 2453.62   1
   0 -14  -2 89903.1 2337.80   1
   0 -14   3 9037.76 825.593   1
   0 -14  -3 9879.39 779.399   1
   0  14   3 7928.88 551.584   4
   0 -14   4 7764.45 787.538   1
   0  14   4 7499.10 554.899   4
   0 -14   5-62.7316 265.482   1
   0  14   5 172.873 138.181   4
   0 -14   6 8624.30 891.386   1
   0  14   6 8491.40 633.611   4
   0 -14   7 493.108 318.079   1
   0  14   7-510.542 327.496   4
   0 -14   8 5180.36 760.597   1
   0  14   8 4247.71 459.234   4
   0  14   9 49796.8 1665.47   4
   0 -14   9 50850.0 2353.79   1
   0  14  10 8726.47 772.479   4
   0 -14  10 7730.14 965.529   1
   0  14  11 68120.0 2047.88   4
   0  14  11 67740.1 1837.14   2
   0  14  12 90.1545 184.883   2
   0  14  12-39.2232 271.031   4
   0  14  13 6182.68 662.039   4
   0  14  13 6266.44 581.583   2
   0  14  14 387.594 251.201   4
   0  14  14 636.246 217.440   2
   0  14  15 806.434 245.740   2
   0  14  16 26.4797 136.040   2
   0 -16   0 28039.6 1559.65   1
   0 -16  -1 1151.78 385.043   1
   0 -16   1 1375.20 408.419   1
   0 -16  -2 30885.5 1563.70   1
   0  16   2 29758.8 1111.87   4
   0 -16   2 31233.9 1674.05   1
   0 -16   3 5012.79 721.991   1
   0  16   3 4642.24 462.877   4
   0 -16   4 12499.5 1110.72   1
   0  16   4 11782.7 753.190   4
   0  16   5 2401.01 362.951   4
   0 -16   5 2669.76 598.030   1
   0 -16   6 11426.0 1131.86   1
   0  16   6 10103.4 732.231   4
   0 -16   7 2316.60 569.991   1
   0  16   7 1726.89 249.676   4
   0  16   8 994.352 248.249   4
   0 -16   8 1045.50 475.469   1
   0  16   9 10997.2 796.668   4
   0  16  10 1090.17 331.872   4
   0  16  11 10193.8 805.237   4
   0  16  12-136.778 215.537   4
   0  16  13 9512.51 740.708   4
   0  16  14 2306.65 401.456   4
   0 -18   0 2175.90 536.071   1
   0  18   1-55.3964 175.754   4
   0 -18  -1 11.9673 316.574   1
   0 -18   1-174.932 294.774   1
   0 -18   2 875.766 413.696   1
   0  18   2 763.849 232.737   4
   0  18   3 1682.65 311.576   4
   0 -18   3 3228.62 697.806   1
   0  18   4 38551.1 1396.22   4
   0 -18   4 40761.5 2207.54   1
   0  18   5 32896.1 1315.74   4
   0  18   6 22976.6 1096.16   4
   0  18   7 16428.6 948.053   4
   0  18   8 200.652 188.737   4
   0  18   9 2167.68 372.131   4
   0  18  10 1544.93 323.305   4
   0  18  11 4528.44 509.013   4
   0  18  12-44.5051 166.704   4
   0  18  13 16052.3 873.907   4
   0  18  14 2960.94 391.271   4
   0  20   0 142.581 168.606   4
   0  20  -1-228.602 187.006   4
   0  20   1-166.070 189.996   4
   0  20   2 3767.31 458.862   4
   0  20   3 3073.09 426.558   4
   0  20   4 29095.2 1235.19   4
   0  20   5 15234.5 892.530   4
   0  20   6 16523.5 925.178   4
   0  20   7 12824.5 809.031   4
   0  20   8 1001.38 264.239   4
   0  20   9 376.123 208.770   4
   0  20  10-61.0603 156.304   4
   0  20  11-200.557 202.888   4
   0  20  12 84.4033 143.219   4
   0  20  13 10591.2 625.807   4
   0  22   0 16645.3 943.108   4
   0  22  -1 110.150 185.715   4
   0  22   1 193.962 191.603   4
   0  22  -2 13223.5 824.358   4
   0  22   2 12909.4 815.364   4
   0  22  -3 1820.85 334.085   4
   0  22   3 1429.46 282.230   4
   0  22   4 114.294 154.752   4
   0  22   5-378.768 209.162   4
   0  22   6 485.566 186.598   4
   0  22   7 1607.05 291.958   4
   0  22   8 548.601 212.855   4
   0  22   9 5295.72 468.658   4
   0  22  10 440.865 162.544   4
   0  24   0 26088.3 1080.84   4
   0  24  -1 611.148 204.787   4
   0  24   1 814.619 241.235   4
   0  24   2 7142.45 568.193   4
   0  24  -2 7471.13 575.410   4
   0  24   3-59.6228 143.832   4
   0  24  -3-273.330 186.770   4
   0  24  -4-16.8700 185.571   4
   0  24   4 306.890 156.581   4
   0  24   5 675.077 205.309   4
   0  24  -5 340.773 139.188   4
   0  24  -6 28.5515 115.006   4
   0  24   6-8.85375 125.543   4
   0  24  -7 288.163 142.624   4
   0  24   7 154.615 141.149   4
  -1   1   2 7395.52 175.845   1
  -1  -1   2 6985.92 234.911   1
   1   1   3 2478.06 79.6038   1
  -1   1   3 2812.71 121.410   1
   1  -1   3 2800.56 154.332   1
  -1  -1   3 2838.87 174.061   1
   1   1   4 4551.03 136.803   1
  -1  -1   4 5041.69 262.101   1
   1  -1   4 4873.03 235.675   1
  -1   1   4 4851.07 180.078   1
  -1  -1   5 92400.2 1161.27   1
   1  -1   5 91407.0 1101.95   1
  -1   1   5 90351.4 857.437   1
   1  -1   6 2977.66 226.406   1
   1   1   6 2602.61 131.746   1
  -1  -1   6 2992.06 235.382   1
  -1   1   6 2853.97 167.989   1
   1   1   7 4339.84 189.398   1
  -1  -1   7 5065.58 312.995   1
   1  -1   7 4922.98 302.769   1
  -1   1   7 5098.36 248.461   1
  -1  -1   8 114672. 1550.33   1
   1  -1   8 115125. 1487.00   1
  -1  -1   9 38379.4 927.260   1
  -1   1  10 280921. 3211.47   2
   1   1  10 278302. 3230.33   2
   1   1  11 1274.41 283.178   2
   1  -1  11 1209.45 293.925   2
  -1   1  11 1361.75 270.104   2
  -1  -1  11 811.374 240.599   2
   1   1  12 125236. 2442.43   2
  -1  -1  12 127659. 2465.64   2
   1  -1  12 131411. 2495.95   2
  -1   1  12 123889. 2395.82   2
  -1  -1  13 517.221 184.867   2
   1  -1  13 816.063 245.596   2
  -1   1  13 918.307 232.714   2
   1  -1  14 2883.88 396.457   2
  -1  -1  14 2848.55 412.867   2
  -1   1  14 2670.45 391.055   2
   1   1  14 1957.22 322.881   2
  -1  -1  15-133.435 224.346   2
   1   1  15-687.794 365.654   2
  -1   1  15-313.257 340.911   2
   1  -1  15-366.015 278.592   2
  -1   1  16 59.7528 294.661   2
   1  -1  16-133.509 298.355   2
   1   1  16-52.4853 303.792   2
  -1  -1  16 323.488 170.577   2
  -1   1  17 1324.84 355.736   2
  -1  -1  17 1777.40 352.823   2
   1   1  17 1269.17 303.407   2
   1  -1  17 1487.71 335.600   2
  -1  -1  18 12289.3 796.712   2
  -1   1  18 11470.5 805.608   2
   1   1  18 11815.8 830.911   2
   1  -1  18 11308.7 787.236   2
  -1   1  19 21944.7 1053.64   2
   1   1  19 23675.2 1063.62   2
  -1  -3   2 18673.4 475.232   1
  -1  -3   3 55070.1 892.789   1
   1  -3   4 8044.43 359.285   1
  -1  -3   4 7850.51 373.698   1
  -1  -3   5 6079.53 369.338   1
   1  -3   5 6094.63 346.641   1
  -1  -3   6 3157.69 308.600   1
   1  -3   6 3535.47 301.091   1
   1  -3   7 525.255 147.804   1
  -1  -3   7 561.742 167.894   1
  -1  -3   8 13776.1 670.574   1
   1  -3   8 13900.5 660.526   1
   1  -3   9 6276.89 467.652   1
  -1  -3   9 6210.33 464.123   1
  -1   3  10 38418.0 1271.33   4
  -1   3  10 35607.6 1161.72   2
  -1  -3  10 37024.3 1143.42   1
   1   3  10 37717.5 1198.90   2
   1   3  10 37218.0 1264.70   4
   1   3  11 94.8029 175.626   2
   1  -3  11-108.926 172.333   2
  -1  -3  11-210.294 209.112   2
  -1   3  11 9.39431 149.604   2
   1   3  11 480.183 295.862   4
   1   3  12 32713.6 1259.41   2
  -1  -3  12 34070.4 1295.24   2
  -1   3  12 33158.7 1249.66   2
   1  -3  12 32537.3 1263.38   2
  -1  -3  13 1790.86 335.054   2
   1  -3  13 1531.75 286.073   2
   1   3  13 2281.40 411.268   2
  -1   3  14 9621.03 744.715   2
  -1  -3  14 11022.5 801.708   2
   1   3  14 9558.55 718.814   2
   1  -3  14 9879.38 773.264   2
   1  -3  15 2398.94 386.212   2
   1   3  15 1731.02 273.274   2
  -1   3  15 2140.13 375.459   2
  -1  -3  15 2627.96 445.021   2
  -1  -3  16 12772.0 850.786   2
   1  -3  16 12326.7 832.240   2
  -1   3  16 12213.5 909.197   2
   1   3  16 12795.1 914.284   2
   1   3  17 4621.99 607.779   2
  -1  -3  17 4660.28 499.154   2
  -1   3  17 5145.10 600.818   2
  -1   3  18 3399.74 478.997   2
   1   3  18 3996.45 544.587   2
   1   3  19 10348.8 743.016   2
  -1   3  19 10395.1 743.939   2
   1   3  20 2040.54 339.891   2
  -1  -5   2 15450.7 534.287   1
  -1  -5   3 741925. 3849.96   1
  -1  -5   4 88306.3 1415.28   1
   1  -5   4 86911.8 1370.07   1
  -1  -5   5 76586.9 1415.17   1
   1  -5   5 77576.9 1391.65   1
   1  -5   6 22114.9 797.136   1
  -1  -5   6 21654.4 816.687   1
   1  -5   7 19377.0 807.775   1
  -1  -5   7 19432.6 832.644   1
   1  -5   8 1814.93 304.373   1
  -1  -5   8 1919.21 314.732   1
  -1   5   9 390.077 141.934   2
   1   5   9 88.0764 110.531   2
  -1   5   9 212.577 150.610   4
   1   5   9 304.388 142.021   4
  -1  -5   9 272.850 176.646   1
   1  -5   9 261.990 168.857   1
   1  -5  10 209.953 158.079   1
  -1   5  10 204.521 175.238   4
  -1  -5  10 227.266 158.032   1
   1   5  10 197.254 141.092   2
  -1   5  10-57.2022 176.160   2
   1   5  10 219.500 179.701   4
  -1   5  11 240.435 161.409   2
   1   5  11 510.326 239.257   4
  -1   5  11 532.021 266.343   4
   1   5  11 708.973 217.539   2
   1   5  12 7215.14 615.026   2
  -1   5  12 6481.98 581.839   2
   1   5  12 6934.75 655.855   4
  -1   5  12 7221.19 654.511   4
  -1   5  13-183.531 276.168   2
   1   5  13 679.894 294.041   2
   1   5  14 49137.5 1688.41   2
  -1   5  14 46887.3 1678.60   2
   1   5  15 18442.1 1129.29   2
  -1   5  15 18486.3 1118.57   2
   1   5  16 40776.8 1649.38   2
  -1   5  16 41194.7 1643.57   2
  -1   5  17 6547.52 713.674   2
   1   5  17 7985.89 730.930   2
  -1   5  18 3716.91 491.191   2
   1   5  18 3139.44 486.201   2
  -1   5  19 907.099 321.719   2
   1   5  19 746.478 262.059   2
   1   5  20 777.324 238.149   2
  -1  -7   2 9231.96 487.119   1
  -1  -7   3 42444.9 1072.98   1
  -1  -7   4 50046.0 1211.58   1
   1  -7   4 50368.5 1210.88   1
   1  -7   5 102901. 1825.72   1
  -1  -7   5 99342.6 1794.04   1
  -1  -7   6 104862. 1950.29   1
   1  -7   6 108650. 1983.41   1
  -1  -7   7 58619.8 1574.34   1
   1  -7   7 58119.2 1539.18   1
   1   7   8 10438.3 623.767   4
   1   7   8 9839.04 593.110   2
   1  -7   8 10664.8 721.995   1
  -1  -7   8 10858.2 733.209   1
  -1   7   8 10254.4 595.722   2
  -1   7   8 10393.0 622.258   4
  -1   7   9 3897.80 411.850   4
   1   7   9 3885.32 409.611   2
  -1   7   9 3791.63 414.087   2
   1   7   9 4453.45 440.849   4
   1  -7   9 3997.74 471.690   1
  -1  -7   9 4395.26 515.127   1
  -1  -7  10 31711.3 1391.72   1
   1   7  10 28653.3 1156.85   4
  -1   7  10 29077.5 1142.68   4
   1  -7  10 30517.5 1357.97   1
   1   7  10 29339.9 1127.04   2
  -1   7  10 28610.0 1110.76   2
  -1  -7  11 670.886 237.346   1
   1   7  11 869.139 254.119   2
  -1   7  11 760.438 236.454   4
   1  -7  11 527.253 249.750   1
  -1   7  11 893.026 275.559   2
   1   7  11 613.009 201.251   4
   1   7  12 458.331 269.250   4
  -1   7  12-209.534 219.332   2
  -1   7  12 788.862 301.445   4
   1   7  12 487.360 239.231   2
  -1   7  13-271.571 323.662   2
  -1   7  13 378.345 340.187   4
   1   7  13 460.673 362.138   4
   1   7  13 92.7258 286.065   2
  -1   7  14 39544.7 1592.47   2
   1   7  14 43009.4 1614.19   2
  -1   7  15 14773.1 1053.54   2
   1   7  15 13877.6 1032.87   2
   1   7  16 56505.5 1932.27   2
  -1   7  16 57641.0 1902.35   2
  -1   7  17 12348.2 954.108   2
   1   7  17 14054.1 939.369   2
   1   7  18 1116.75 301.401   2
  -1   7  18 1381.89 362.144   2
  -1   7  19 1296.85 299.432   2
   1   7  19 1329.10 311.775   2
   1   7  20 681.403 206.749   2
  -1  -9   1 41282.7 1134.45   1
  -1  -9   2 3505.90 353.872   1
  -1  -9   3 655.274 188.499   1
   1  -9   4 4282.63 412.166   1
  -1  -9   4 3865.44 403.167   1
  -1  -9  -5 81925.4 1442.65   1
   1  -9   5 82398.7 1856.74   1
  -1  -9   5 79043.4 1818.60   1
  -1  -9   6 86147.7 1991.67   1
   1  -9   6 90091.4 2028.96   1
   1   9   7 42723.3 1223.08   4
  -1   9   7 43008.8 1227.66   4
  -1  -9   7 43034.7 1510.91   1
   1  -9   7 41558.5 1476.69   1
   1   9   8 38825.5 1231.66   2
  -1   9   8 43981.1 1318.64   4
   1  -9   8 44942.1 1628.39   1
  -1  -9   8 42849.0 1587.51   1
  -1   9   8 38700.0 1223.26   2
   1   9   8 44392.1 1322.28   4
   1   9   9 1342.80 290.261   4
  -1   9   9 1365.73 304.473   4
   1  -9   9 1193.02 306.002   1
  -1  -9   9 1714.00 395.748   1
  -1   9   9 1453.98 293.311   2
   1   9   9 1546.52 288.602   2
   1   9  10 2870.52 406.408   4
   1  -9  10 3155.64 527.951   1
   1   9  10 3243.75 416.438   2
  -1   9  10 2498.55 397.069   4
  -1   9  10 3634.61 453.891   2
  -1  -9  10 2707.91 454.839   1
   1   9  11-83.2242 267.866   4
   1  -9  11 251.136 223.062   1
   1   9  11 471.786 251.231   2
  -1   9  11-243.880 197.068   2
  -1   9  11-118.881 264.863   4
  -1  -9  11 214.852 210.433   1
   1   9  12 9599.05 787.167   4
  -1   9  12 9375.96 755.987   4
  -1   9  12 9140.94 702.139   2
   1   9  12 9908.63 772.817   2
  -1   9  13 86.9016 291.595   2
   1   9  13 106.385 294.610   2
   1   9  13 1195.15 327.502   4
  -1   9  13 1129.69 354.994   4
  -1   9  14 12367.8 909.800   2
   1   9  14 11616.5 923.153   2
   1   9  14 14716.2 1030.19   4
  -1   9  14 13523.7 1007.98   4
   1   9  15 3316.70 517.410   2
  -1   9  15 4020.76 571.805   2
   1   9  16 19233.3 1127.15   2
  -1   9  16 20894.4 1138.39   2
  -1   9  17 3920.40 550.735   2
   1   9  17 4620.00 562.971   2
  -1   9  18 941.964 288.311   2
   1   9  18 503.140 248.852   2
   1   9  19 2487.49 366.432   2
  -1   9  19 2675.38 359.370   2
  -1 -11   0 733.677 284.098   1
  -1 -11   1 322889. 3700.73   1
  -1 -11  -1 318446. 3527.31   1
  -1 -11  -2 1338.28 240.165   1
   1 -11   2 1293.77 272.201   1
  -1 -11   2 1392.70 267.857   1
  -1 -11  -3 892.180 194.562   1
   1 -11   3 902.721 222.768   1
  -1 -11   3 1186.57 282.346   1
  -1  11   4 3080.83 336.840   4
  -1 -11  -4 3579.43 371.685   1
   1 -11   4 3485.46 424.309   1
   1  11   4 3632.49 354.301   4
  -1 -11   4 4105.54 479.431   1
  -1  11   5 22490.1 906.134   4
   1 -11   5 22918.7 1122.98   1
   1  11   5 23331.4 914.280   4
  -1 -11   5 23873.1 1137.99   1
  -1 -11   6 721.560 345.425   1
   1  11   6 529.154 209.343   4
  -1  11   6 337.193 197.157   4
   1 -11   6-17.6710 258.009   1
  -1 -11   7 8435.82 756.594   1
   1  11   7 7934.92 551.512   4
   1 -11   7 7903.74 737.947   1
   1  11   7 6881.79 512.513   2
  -1  11   7 8033.67 590.590   4
  -1  11   7 6967.14 526.165   2
  -1 -11   8 55772.5 2003.41   1
   1  11   8 47778.4 1413.64   2
  -1  11   8 50449.0 1435.34   2
   1  11   8 54928.5 1549.89   4
   1 -11   8 57150.3 2039.14   1
  -1  11   8 54923.8 1555.15   4
   1  11   9 15984.3 859.590   2
   1  11   9 17190.9 926.014   4
   1 -11   9 15964.7 1145.77   1
  -1 -11   9 17023.3 1175.74   1
  -1  11   9 15748.9 844.389   2
  -1  11   9 17078.4 918.678   4
   1 -11  10 145584. 3592.95   1
  -1  11  10 148716. 2802.03   4
  -1 -11  10 144490. 3582.28   1
   1  11  10 148526. 2781.90   4
  -1  11  10 142846. 2614.48   2
   1  11  10 144425. 2654.21   2
   1 -11  11 957.839 420.617   1
  -1  11  11 670.425 314.632   4
  -1 -11  11 365.541 246.323   1
  -1  11  11-21.5358 209.271   2
   1  11  11 584.008 242.408   2
   1  11  11 689.667 329.175   4
  -1  11  12 35827.3 1441.22   2
  -1  11  12 37615.5 1534.99   4
   1  11  12 38460.5 1471.78   2
   1  11  12 35643.9 1522.96   4
  -1  11  13 12.6983 238.013   4
   1  11  13-423.070 282.139   4
   1  11  13 1.13606 279.387   2
  -1  11  13 1.66394 245.251   2
   1  11  14-380.371 322.517   2
  -1  11  14-126.275 236.166   2
  -1  11  14 66.1834 294.046   4
   1  11  14 271.034 302.120   4
  -1  11  15 363.881 215.416   2
   1  11  15 346.070 218.839   2
   1  11  16 1178.81 298.207   2
  -1  11  16 1773.68 352.055   2
  -1  11  17 412.233 215.220   2
   1  11  17 371.430 222.647   2
   1  11  18 6624.55 551.300   2
  -1  11  18 6930.32 546.557   2
  -1 -13   0 530.425 271.962   1
   1 -13   0 721.609 278.320   1
  -1 -13   1 150533. 2925.61   1
  -1 -13  -1 151146. 2833.86   1
   1 -13   1 157306. 3012.50   1
   1 -13  -1 151764. 2851.98   1
   1 -13  -2 7465.46 632.355   1
   1 -13   2 8666.80 737.618   1
  -1 -13   2 8044.26 718.472   1
  -1 -13  -2 7492.52 644.315   1
   1  13   3 21341.8 865.913   4
  -1  13   3 20887.7 856.702   4
   1 -13  -3 22668.3 1086.37   1
  -1 -13   3 22813.0 1193.67   1
  -1 -13  -3 22269.7 1079.19   1
   1 -13   3 22444.4 1194.14   1
   1 -13  -4 84.2381 157.060   1
   1 -13   4-217.642 233.122   1
   1  13   4 95.6058 138.852   4
  -1  13   4 8.95852 126.696   4
  -1 -13   4 249.917 293.273   1
  -1 -13   5 11262.4 883.918   1
  -1  13   5 10922.2 679.426   4
   1  13   5 10021.7 660.619   4
   1 -13   5 11327.6 900.593   1
   1 -13   6 16932.2 1128.18   1
  -1  13   6 16855.4 862.350   4
   1  13   6 16209.5 857.062   4
  -1 -13   6 16129.6 1108.93   1
   1 -13   7 108.104 241.609   1
   1  13   7-242.416 252.957   4
  -1 -13   7 697.814 316.270   1
  -1  13   7 73.4881 216.908   4
   1  13   8 31677.7 1244.99   4
   1 -13   8 32444.2 1698.29   1
  -1  13   8 31732.3 1253.57   4
  -1 -13   8 30864.9 1667.52   1
   1  13   9 16245.9 851.987   2
   1  13   9 16621.4 967.770   4
  -1  13   9 15309.2 854.135   2
   1 -13   9 17917.7 1335.58   1
  -1  13   9 17952.9 993.393   4
  -1 -13   9 18344.8 1366.89   1
   1  13  10 142268. 2844.98   4
   1 -13  10 137061. 3822.37   1
  -1 -13  10 140859. 3870.20   1
  -1  13  10 141879. 2630.87   2
   1  13  10 141547. 2652.32   2
  -1  13  10 144982. 2854.75   4
   1  13  11 793.730 215.514   2
  -1 -13  11 1267.22 444.538   1
   1  13  11 1491.67 417.623   4
  -1  13  11 1350.92 398.183   4
  -1  13  11 1022.41 260.971   2
   1 -13  11 761.754 357.604   1
   1  13  12 35963.0 1409.22   2
  -1  13  12 34195.4 1382.16   2
  -1  13  12 36364.7 1517.97   4
   1  13  12 34387.3 1486.27   4
   1  13  13 359.218 282.895   4
  -1  13  13 257.468 199.550   2
   1  13  13 156.727 175.608   2
  -1  13  13 372.883 260.101   4
   1  13  14 505.513 239.681   2
  -1  13  14 284.708 206.977   2
   1  13  14 759.552 329.733   4
  -1  13  14 845.519 363.206   4
  -1  13  15 1015.50 295.066   2
   1  13  15 117.631 197.686   2
  -1  13  16 1439.44 300.773   2
   1  13  16 1627.32 310.120   2
  -1  13  17 1145.62 261.882   2
   1  13  17 1275.62 266.814   2
   1 -15   0 136.950 250.857   1
  -1 -15   0 794.581 302.039   1
   1 -15   1 58812.3 2144.55   1
   1 -15  -1 60700.6 2099.04   1
  -1 -15   1 58692.6 2089.19   1
  -1 -15  -1 59288.5 2036.84   1
   1 -15  -2 3888.29 549.183   1
   1 -15   2 3658.37 590.523   1
   1  15   2 3451.98 374.177   4
  -1 -15  -2 4271.09 580.491   1
  -1  15   2 3542.93 396.413   4
  -1 -15   2 3902.44 593.152   1
  -1 -15  -3 21220.6 1209.86   1
   1  15   3 20137.5 907.149   4
   1 -15   3 22099.6 1356.10   1
  -1 -15   3 21318.0 1324.85   1
  -1  15   3 20037.7 899.779   4
   1 -15  -3 21549.8 1230.76   1
   1  15   4 3155.79 377.786   4
  -1  15   4 3303.45 395.268   4
   1 -15   4 3152.79 573.347   1
  -1 -15   4 3496.78 581.860   1
  -1 -15   5 1539.53 418.815   1
  -1  15   5 1669.34 313.188   4
   1  15   5 935.022 255.177   4
   1 -15   5 1376.82 466.192   1
   1  15   6 235.017 193.423   4
   1 -15   6 397.848 289.910   1
  -1 -15   6 595.305 415.465   1
  -1  15   6 273.173 201.754   4
   1  15   7-260.786 316.891   4
  -1  15   7-435.188 341.261   4
   1 -15   7 549.965 369.785   1
  -1 -15   7 0.93428 288.782   1
   1 -15   8 12960.5 1187.67   1
  -1  15   8 11605.7 778.210   4
   1  15   8 11612.4 760.865   4
  -1 -15   8 11574.8 1135.44   1
  -1 -15   9 3255.61 684.001   1
   1  15   9 3559.50 489.146   4
  -1  15   9 3613.84 471.363   4
   1 -15   9 4610.13 772.856   1
  -1  15  10 33830.3 1415.18   4
   1  15  10 31487.1 1365.96   4
   1  15  11 43.3279 239.719   4
  -1  15  11 337.106 264.495   4
   1  15  12 13411.2 928.719   4
  -1  15  12 12971.6 912.812   4
   1  15  13 125.025 245.271   4
  -1  15  13 587.472 230.270   2
  -1  15  13 400.731 269.361   4
   1  15  13 367.488 220.281   2
  -1  15  14 1442.33 288.302   2
   1  15  14 1594.59 352.871   4
  -1  15  14 1532.39 340.768   4
   1  15  14 1536.99 308.715   2
  -1  15  15 874.727 254.022   2
   1  15  15 798.906 227.629   2
   1  15  16 3024.14 353.878   2
  -1 -17   0 222.642 240.210   1
   1 -17   0 353.003 258.147   1
   1 -17  -1 3214.99 606.851   1
  -1  17   1 3014.66 369.209   4
  -1 -17   1 3329.06 649.011   1
   1  17   1 3308.71 400.051   4
   1 -17   1 3434.81 623.106   1
  -1 -17  -1 3396.31 611.589   1
  -1 -17   2 603.869 329.700   1
   1  17   2 395.376 181.742   4
   1 -17  -2 612.896 296.804   1
  -1  17   2 609.596 218.589   4
   1 -17   2 351.880 314.982   1
  -1  17   3 19427.6 958.018   4
   1 -17   3 18096.4 1393.45   1
  -1 -17   3 19962.3 1467.33   1
   1  17   3 19608.7 960.456   4
  -1 -17   4 10523.7 1101.13   1
   1  17   4 9358.26 700.023   4
   1 -17   4 10470.3 1106.64   1
  -1  17   4 10225.5 718.764   4
  -1 -17   5 22523.3 1593.28   1
   1  17   5 21185.6 1037.91   4
  -1  17   5 20496.9 1021.69   4
   1 -17   5 24466.3 1669.90   1
   1  17   6 18242.5 986.449   4
  -1 -17   6 17797.8 1448.09   1
   1 -17   6 18132.7 1461.22   1
  -1  17   6 17046.3 945.951   4
   1  17   7 4244.82 477.614   4
  -1  17   7 4701.47 502.707   4
  -1  17   8 873.621 217.730   4
   1  17   8 745.618 233.602   4
  -1  17   9-162.627 236.892   4
   1  17   9-136.508 220.952   4
  -1  17  10 414.465 233.234   4
   1  17  10 81.4391 186.220   4
  -1  17  11 431.458 228.403   4
   1  17  11 81.4609 183.312   4
   1  17  12 2235.81 371.407   4
  -1  17  12 2318.87 381.269   4
  -1  17  13 872.230 270.009   4
   1  17  13 745.696 259.212   4
  -1  17  14 20952.9 1019.53   4
   1  17  14 20478.9 1016.66   4
  -1 -19   0 10.2073 276.550   1
  -1  19   0 5.00379 224.300   4
   1  19   0-94.1533 187.623   4
   1 -19   0-94.4570 291.558   1
  -1 -19   1 397.060 306.756   1
   1  19   1 196.273 167.512   4
  -1  19   1-2.73678 175.950   4
   1  19   2-56.1441 212.242   4
  -1  19   2 183.819 195.635   4
   1  19   3 12646.0 808.382   4
  -1  19   3 12375.2 823.803   4
  -1  19   4 13040.5 832.126   4
   1  19   4 13134.7 836.460   4
   1  19   5 35809.8 1377.88   4
  -1  19   5 36031.1 1377.14   4
   1  19   6 26845.6 1175.59   4
  -1  19   6 27738.3 1197.82   4
  -1  19   7 10449.7 751.717   4
   1  19   7 11175.4 771.828   4
   1  19   8 1720.38 345.690   4
  -1  19   8 1562.71 343.977   4
  -1  19   9 789.078 270.609   4
   1  19   9 1047.38 298.586   4
   1  19  10 6497.85 584.217   4
  -1  19  10 7131.73 629.075   4
  -1  19  11-278.137 218.855   4
   1  19  11-142.454 155.505   4
  -1  19  12 591.917 205.969   4
   1  19  12 755.509 227.564   4
  -1  19  13 703.253 226.959   4
   1  19  13 393.282 172.585   4
  -1  21   0-261.970 245.063   4
   1  21   0-196.349 235.351   4
  -1  21  -1 2833.96 414.562   4
   1  21   1 2371.22 359.248   4
   1  21  -1 2574.16 378.971   4
  -1  21   1 2888.82 404.159   4
  -1  21   2 95.0754 209.331   4
  -1  21  -2 387.941 222.602   4
   1  21  -2 91.8747 175.160   4
   1  21   2 395.155 206.790   4
   1  21   3 12165.3 812.640   4
  -1  21   3 12401.7 834.358   4
   1  21   4 3856.44 467.352   4
  -1  21   4 4109.15 476.765   4
  -1  21   5 6002.51 567.477   4
   1  21   5 6270.25 569.017   4
   1  21   6 5369.44 541.041   4
  -1  21   6 6040.81 556.372   4
   1  21   7 2036.54 342.301   4
  -1  21   7 2290.41 363.233   4
   1  21   8 2102.46 336.943   4
  -1  21   8 2597.73 358.657   4
   1  21   9 6.24569 162.926   4
  -1  21   9-9.66329 140.434   4
   1  21  10 533.719 186.736   4
  -1  21  10 257.639 137.835   4
   1  21  11-293.161 195.551   4
  -1  21  11-307.686 176.745   4
  -1  21  12 4199.07 396.323   4
   1  21  12 4465.44 407.587   4
  -1  23   0 169.491 208.892   4
   1  23   0 74.1701 199.071   4
  -1  23  -1 20371.7 1002.08   4
   1  23   1 19287.7 992.519   4
  -1  23   1 19181.3 968.526   4
   1  23  -1 21500.6 1039.07   4
  -1  23   2 1052.31 246.817   4
  -1  23  -2 1353.60 269.156   4
   1  23   2 1174.07 272.472   4
   1  23  -2 1340.31 300.237   4
  -1  23  -3 829.997 231.980   4
   1  23   3 569.017 194.770   4
  -1  23   3 986.760 209.931   4
   1  23  -3 1020.90 231.081   4
   1  23  -4 50.5073 170.658   4
  -1  23  -4-148.688 199.669   4
   1  23   4 219.385 150.658   4
  -1  23   4 41.5241 150.384   4
   1  23   5 795.489 227.682   4
  -1  23   5 673.845 219.643   4
   1  23  -5 533.846 178.381   4
  -1  23  -5 575.547 201.517   4
  -1  23   6 266.497 162.942   4
   1  23   6 7.46203 147.136   4
  -1  23  -6 65.8817 135.093   4
   1  23   7 223.850 147.644   4
  -1  23   7 33.4899 134.955   4
  -1  23   8 2812.03 342.262   4
   1  23   8 2771.99 324.924   4
   1  23   9 1267.07 237.061   4
  -1  23   9 1488.68 255.051   4
  -1  25   0 429.468 188.083   4
   1  25   0 3.99283 152.990   4
  -1  25   1 15168.6 758.307   4
  -1  25  -1 15345.7 760.548   4
   1  25  -1 16237.7 799.895   4
   1  25   1 15331.9 778.987   4
   1  25  -2 434.599 159.480   4
   1  25   2 472.318 192.444   4
  -1  25  -2 374.174 140.230   4
  -1  25   2 465.607 173.418   4
  -1  25   3-26.3844 112.743   4
   1  25  -3 60.7092 125.514   4
  -1  25  -3 97.6040 127.333   4
   1  25   3 28.0666 118.585   4
  -1  25   4-102.201 116.471   4
  -1  25  -4-115.694 127.953   4
   1  25  -4-80.1253 135.973   4
   1  25   4 115.639 116.847   4
  -2   0   2 161720. 999.362   1
   2   0   3 13980.4 259.320   1
  -2   0   3 12777.0 322.146   1
   2   0   4 10792.1 271.204   1
  -2   0   4 10520.8 323.035   1
  -2   0   5 255306. 1714.82   1
   2   0   5 260050. 1501.96   1
  -2   0   6 9117.76 354.074   1
   2   0   6 9146.56 305.764   1
  -2   0   7 9721.81 389.649   1
   2   0   7 9537.06 333.193   1
  -2   0   8 72417.2 1122.81   1
   2   0   8 64335.5 880.225   1
  -2   0   9 289591. 2351.91   1
  -2   0  10 11685.6 678.308   2
   2   0  10 11388.8 676.177   2
  -2   0  11 234516. 3132.58   2
   2   0  11 235682. 3198.72   2
   2   0  12 854.336 236.271   2
  -2   0  12 869.827 228.119   2
   2   0  13 31134.3 1280.53   2
  -2   0  13 29779.6 1247.22   2
   2   0  14-148.409 263.278   2
  -2   0  14-71.3804 208.390   2
   2   0  15 5603.80 582.884   2
  -2   0  15 6174.29 610.057   2
  -2   0  16 1306.79 329.165   2
   2   0  16 709.471 221.928   2
  -2   0  17 628.328 308.072   2
   2   0  17-78.8047 213.644   2
  -2   0  18 14965.2 918.710   2
   2   0  18 15576.3 943.593   2
   2   0  19 6079.87 578.411   2
  -2  -2   0 968869. 2569.13   1
  -2  -2   1 382.771 81.3278   1
  -2  -2  -1 314.752 43.2807   1
  -2  -2   2 60172.6 814.302   1
  -2  -2  -2 62173.7 426.326   1
  -2  -2   3 10710.0 373.478   1
  -2  -2   4 51731.6 905.466   1
  -2   2   4 53626.0 693.497   1
  -2   2   5 817.853 97.0848   1
  -2  -2   5 914.122 168.061   1
   2  -2   5 980.803 151.039   1
  -2   2   6 6406.62 275.188   1
   2  -2   6 6671.90 370.197   1
  -2  -2   6 6760.34 393.398   1
  -2  -2   7 14369.9 595.322   1
   2  -2   7 14058.1 564.858   1
  -2   2   7 12965.3 412.640   1
   2  -2   8 5516.31 379.366   1
  -2  -2   8 5780.22 405.817   1
  -2  -2   9 131306. 1960.51   1
   2  -2   9 127816. 1823.64   1
   2   2  10 7717.71 591.992   4
   2   2  10 7237.89 538.204   2
  -2   2  10 6845.93 532.437   2
   2   2  11 60427.9 1623.50   2
   2  -2  11 59399.2 1614.11   2
  -2  -2  11 62782.0 1651.39   2
  -2   2  11 61401.4 1588.17   2
   2   2  12 350.991 223.460   2
  -2  -2  12-199.564 192.867   2
  -2   2  12-46.1954 219.625   2
   2  -2  12 477.550 263.990   2
   2  -2  13 8713.82 675.409   2
  -2  -2  13 8299.68 673.921   2
  -2   2  13 7727.49 629.938   2
   2   2  13 8808.89 718.008   2
   2   2  14-261.676 338.128   2
  -2   2  14 37.6056 266.230   2
   2  -2  14-130.132 243.783   2
  -2  -2  14-56.2435 218.248   2
   2  -2  15 88.0006 229.063   2
   2   2  15-425.155 366.615   2
  -2   2  15 0.56904 266.183   2
  -2  -2  15 739.005 264.254   2
   2  -2  16-116.266 233.760   2
  -2  -2  16-89.8347 177.561   2
  -2   2  16-58.4505 247.938   2
  -2  -2  17 3172.37 463.668   2
   2  -2  17 2352.96 380.643   2
   2   2  17 1793.31 390.839   2
  -2   2  17 2271.42 448.059   2
   2  -2  18 4370.58 488.555   2
  -2   2  18 5820.68 619.944   2
   2   2  18 4728.53 570.832   2
  -2   2  19 10950.5 758.817   2
   2   2  19 10702.2 742.275   2
   2   2  20 7648.02 560.325   2
  -2  -4   1 1844.34 171.385   1
  -2  -4   2 4568.33 276.701   1
  -2  -4   3 83812.2 1226.56   1
  -2  -4  -4 238118. 1148.60   1
  -2  -4   4 257327. 2285.95   1
   2  -4   5 56375.6 1099.18   1
  -2  -4   5 59189.6 1194.56   1
   2  -4   6 29707.4 857.723   1
  -2  -4   6 30261.3 921.356   1
  -2  -4   7 838.204 202.415   1
   2  -4   7 1002.22 214.495   1
  -2  -4   8-51.2323 137.014   1
   2  -4   8 93.6619 120.449   1
   2   4   9 426.800 140.953   2
  -2   4   9 354.519 146.965   2
   2  -4   9 399.250 167.067   1
  -2  -4   9 71.8234 129.455   1
   2   4   9 143.139 126.865   4
  -2   4   9 234.278 161.021   4
  -2   4  10 65.3433 199.706   4
   2  -4  10-136.088 131.570   1
   2   4  10-39.4090 122.298   2
   2   4  10-17.7320 166.390   4
  -2  -4  10 24.0351 124.714   1
  -2   4  10-1.42202 123.861   2
   2   4  11 6084.32 566.607   4
  -2  -4  11 5438.50 505.720   2
  -2   4  11 6660.75 595.735   4
   2   4  11 6302.00 527.261   2
   2  -4  11 4820.48 460.623   2
  -2   4  11 5820.73 499.392   2
   2   4  12 200.356 176.256   2
  -2   4  12-311.144 291.243   2
   2  -4  12-56.7433 183.906   2
  -2  -4  12-28.7216 188.075   2
   2   4  13 15860.2 954.845   2
   2  -4  13 14721.5 880.123   2
  -2   4  13 14502.6 862.359   2
  -2  -4  13 16521.7 946.982   2
  -2  -4  14 2863.53 422.037   2
   2   4  14 2247.52 403.953   2
  -2   4  14 2410.41 374.119   2
  -2   4  15 19857.4 1124.20   2
   2   4  15 21137.6 1142.95   2
   2   4  16 4165.03 509.462   2
  -2   4  16 4616.46 626.932   2
   2   4  17 3730.41 536.901   2
  -2   4  17 4720.21 576.958   2
  -2   4  18 8580.65 749.893   2
   2   4  18 7874.83 710.351   2
   2   4  19 667.813 268.804   2
  -2   4  19 1233.38 325.505   2
   2   4  20 541.197 207.999   2
  -2  -6   1 1698.20 197.338   1
  -2  -6   2 15757.0 596.037   1
  -2  -6   3 2814.19 288.915   1
  -2  -6   4 162926. 2069.37   1
  -2  -6   5 75246.4 1488.24   1
   2  -6   5 77410.7 1484.40   1
   2  -6   6 19492.2 795.611   1
  -2  -6   6 19109.3 813.452   1
  -2  -6   7 54530.7 1452.08   1
   2  -6   7 52942.6 1389.51   1
   2  -6   8 2204.41 333.884   1
  -2  -6   8 2321.68 352.392   1
  -2  -6   9 17520.9 941.608   1
  -2   6   9 17717.2 833.353   4
   2   6   9 16612.5 827.662   4
   2  -6   9 17051.8 906.920   1
   2   6   9 16983.2 793.170   2
  -2   6   9 15949.7 767.129   2
   2   6  10 229.739 144.502   4
  -2   6  10 137.618 163.336   4
   2  -6  10 252.571 191.224   1
  -2   6  10 290.639 135.456   2
  -2  -6  10 20.1509 149.969   1
   2   6  10 103.679 145.610   2
  -2  -6  11 4741.01 531.352   1
  -2   6  11 5136.74 497.131   2
   2   6  11 4967.09 490.834   2
   2   6  11 4768.26 502.119   4
  -2   6  11 4777.23 532.139   4
   2   6  12 178.550 183.506   2
  -2   6  12-251.155 297.378   2
  -2   6  12 657.402 330.244   4
   2   6  12 356.465 255.241   4
  -2   6  13 14081.6 891.088   2
   2   6  13 16802.7 1031.72   4
   2   6  13 16046.2 979.327   2
   2   6  14 7267.28 651.383   2
  -2   6  14 5585.25 628.464   2
   2   6  15 61619.4 2030.98   2
  -2   6  15 64759.3 2038.92   2
   2   6  16 30486.1 1444.37   2
  -2   6  16 32002.8 1410.03   2
   2   6  17 22592.2 1206.12   2
  -2   6  17 19980.3 1168.05   2
  -2   6  18 476.983 317.866   2
   2   6  18 190.033 211.978   2
   2   6  19 1168.90 300.293   2
  -2   6  19 891.692 295.773   2
   2   6  20 6041.91 481.382   2
  -2  -8   0 54546.5 1186.14   1
  -2  -8   1 2500.90 271.688   1
  -2  -8   2 4657.85 383.796   1
  -2  -8   3 5242.22 431.956   1
  -2  -8  -4 38017.6 920.128   1
  -2  -8   4 35853.2 1111.10   1
   2  -8   5 45429.1 1302.28   1
  -2  -8   5 44469.9 1297.98   1
  -2  -8  -5 43543.8 944.660   1
   2  -8   6 133258. 2332.51   1
  -2  -8   6 128050. 2312.34   1
  -2  -8   7 90020.4 2044.60   1
   2   8   7 90605.3 1745.96   4
   2  -8   7 91116.1 2053.65   1
   2   8   8 408.188 128.421   4
  -2   8   8 482.390 188.087   4
  -2  -8   8 296.764 196.676   1
   2   8   8 454.988 188.959   2
  -2   8   8 397.391 173.449   2
   2  -8   8 826.196 280.558   1
   2  -8   9 12077.4 850.530   1
  -2  -8   9 11771.6 866.239   1
  -2   8   9 11807.4 714.594   4
   2   8   9 11417.6 701.753   4
  -2   8   9 11699.8 689.582   2
   2   8   9 10568.1 668.610   2
  -2  -8  10 4189.36 549.937   1
   2   8  10 4108.70 449.615   2
   2   8  10 4505.08 489.897   4
   2  -8  10 4846.31 595.063   1
  -2   8  10 4347.37 478.337   4
  -2   8  10 4165.02 460.206   2
  -2   8  11 6712.29 597.419   4
   2  -8  11 6655.98 700.476   1
  -2  -8  11 7224.71 738.896   1
   2   8  11 6735.19 603.259   2
   2   8  11 6778.75 599.260   4
  -2   8  11 6317.79 527.142   2
  -2   8  12-366.754 311.407   2
   2   8  12-76.1662 209.603   4
   2   8  12 336.290 241.372   2
  -2   8  12-22.3800 203.020   4
   2   8  13 4205.50 565.512   2
   2   8  13 4301.06 560.141   4
  -2   8  13 3528.84 477.088   2
  -2   8  13 4603.23 570.722   4
   2   8  14 1874.87 487.561   4
  -2   8  14 475.887 216.073   2
   2   8  15 51182.0 1827.97   2
  -2   8  15 51137.0 1782.33   2
  -2   8  16 16087.8 1058.53   2
   2   8  16 15836.6 1068.98   2
   2   8  17 3958.44 604.808   2
  -2   8  17 5893.34 619.103   2
   2   8  18 294.486 217.487   2
  -2   8  18 1234.32 349.283   2
  -2   8  19 1280.52 307.047   2
   2   8  19 791.994 262.041   2
   2   8  20 964.792 221.311   2
  -2 -10   0 316653. 3336.91   1
  -2 -10  -1 7405.24 518.571   1
  -2 -10   1 7243.55 542.887   1
  -2 -10   2 57074.6 1488.99   1
  -2 -10  -2 58682.2 1394.59   1
  -2 -10   3 594.668 180.214   1
  -2 -10  -3 741.709 173.390   1
  -2 -10   4 10671.6 705.476   1
   2 -10   4 10943.5 705.116   1
  -2 -10  -4 11304.1 605.661   1
   2 -10   5 2810.98 390.486   1
   2  10   5 3439.47 349.199   4
  -2 -10   5 2804.49 414.154   1
   2 -10   6 1654.12 353.742   1
  -2  10   6 1917.09 308.649   4
   2  10   6 1598.46 276.237   4
  -2 -10   6 1675.95 366.097   1
  -2  10   7 30236.7 1081.81   4
   2 -10   7 31545.0 1359.28   1
   2  10   7 23136.8 937.459   2
  -2  10   7 23778.4 939.110   2
  -2 -10   7 29550.3 1302.37   1
   2  10   7 29387.9 1076.81   4
  -2  10   8 8919.91 605.848   2
   2  10   8 9584.82 628.059   4
  -2  10   8 9460.16 634.401   4
   2 -10   8 9308.40 797.573   1
  -2 -10   8 9200.01 788.285   1
   2  10   8 8136.17 595.732   2
   2  10   9 38261.1 1313.72   2
   2  10   9 40371.7 1356.94   4
   2 -10   9 39786.2 1692.40   1
  -2  10   9 40038.7 1359.44   4
  -2  10   9 36822.5 1270.32   2
  -2 -10   9 39428.5 1706.16   1
   2 -10  10 4250.72 646.837   1
  -2  10  10 3687.52 433.330   2
   2  10  10 4183.31 483.461   2
  -2  10  10 4566.20 512.428   4
   2  10  10 4803.90 524.193   4
  -2 -10  10 4087.75 646.169   1
  -2 -10  11 41395.2 1904.62   1
   2  10  11 46587.5 1585.73   2
  -2  10  11 47827.2 1621.91   4
  -2  10  11 45676.2 1524.04   2
   2  10  11 47547.0 1623.14   4
   2 -10  11 42560.4 1920.00   1
   2  10  12-60.5806 266.129   4
  -2  10  12-178.676 290.514   2
   2  10  12 586.856 279.806   2
  -2  10  12 68.5874 232.937   4
  -2  10  13 6655.22 639.459   2
  -2  10  13 6972.37 712.580   4
   2  10  13 6608.78 691.461   4
   2  10  13 5910.92 593.169   2
  -2  10  14 463.103 194.398   2
  -2  10  14 1116.80 406.036   4
   2  10  14 1387.14 484.924   4
  -2  10  15 1915.56 404.408   2
   2  10  15 1667.87 317.819   2
   2  10  16-256.924 281.263   2
  -2  10  16 15.6326 231.721   2
  -2  10  17 547.824 262.857   2
   2  10  17-10.1324 176.723   2
  -2  10  18 2778.67 397.048   2
   2  10  18 1758.46 345.238   2
   2  10  19 3493.36 381.197   2
  -2 -12   0 269040. 3546.87   1
  -2 -12   1 4244.71 478.325   1
  -2 -12  -1 3454.12 426.665   1
   2 -12   2 49062.4 1615.88   1
  -2 -12  -2 49808.9 1494.86   1
  -2 -12   2 48087.0 1555.61   1
   2 -12   3 469.529 203.457   1
  -2  12   3 368.768 132.275   4
   2  12   3 375.758 109.081   4
  -2 -12  -3 540.584 182.026   1
  -2 -12   3 568.489 281.383   1
   2 -12   4 10418.5 794.382   1
  -2  12   4 9512.08 594.256   4
  -2 -12   4 10113.1 783.754   1
   2  12   4 9400.98 580.704   4
  -2 -12  -4 10401.0 693.445   1
   2 -12   5 13340.5 916.185   1
  -2 -12   5 13168.5 897.381   1
  -2  12   5 13401.1 721.048   4
   2  12   5 12186.2 696.002   4
   2 -12   6 19428.5 1147.98   1
  -2 -12   6 18932.4 1135.06   1
   2  12   6 18026.2 876.281   4
  -2  12   6 19121.9 899.649   4
   2  12   7 1098.28 225.160   4
  -2  12   7 1453.11 257.870   4
  -2 -12   7 1853.91 433.986   1
   2 -12   7 1581.64 368.148   1
  -2  12   8 13293.0 813.140   4
   2  12   8 12665.7 784.219   4
  -2  12   8 11304.4 703.194   2
   2  12   8 12788.5 738.191   2
  -2 -12   8 13344.4 1066.97   1
   2 -12   8 13729.6 1089.83   1
  -2  12   9 111217. 2260.06   2
   2  12   9 114927. 2289.95   2
   2 -12   9 113996. 3164.07   1
  -2  12   9 118077. 2451.14   4
   2  12   9 113479. 2409.56   4
  -2 -12   9 115820. 3206.78   1
   2  12  10 8846.31 701.372   2
  -2 -12  10 8418.30 943.317   1
  -2  12  10 8444.74 722.905   4
   2 -12  10 8836.77 965.921   1
  -2  12  10 7824.28 625.762   2
   2  12  10 8721.07 738.585   4
   2 -12  11 81815.4 2899.43   1
  -2  12  11 99498.1 2424.17   4
   2  12  11 96915.4 2380.55   4
  -2 -12  11 82968.7 2932.19   1
   2  12  11 97252.8 2285.45   2
  -2  12  11 97406.6 2261.12   2
   2  12  12-159.340 284.226   2
   2  12  12-157.879 268.439   4
  -2  12  12-48.8215 209.183   2
  -2  12  12-95.2633 279.632   4
   2  12  13 2566.95 396.409   2
  -2  12  13 3223.20 445.709   2
  -2  12  13 2948.65 471.705   4
   2  12  13 2865.36 491.605   4
   2  12  14-519.990 300.441   2
   2  12  14 299.162 268.720   4
  -2  12  14-92.9836 239.897   2
  -2  12  14 339.075 311.310   4
   2  12  15 13768.7 915.826   2
  -2  12  15 14244.4 907.252   2
  -2  12  16 3276.84 446.195   2
   2  12  16 2615.28 376.547   2
   2  12  17 83.1052 163.621   2
  -2  12  17 285.997 225.115   2
   2  12  18 6758.73 528.760   2
  -2 -14   0 116823. 2702.40   1
   2 -14   0 123936. 2860.70   1
   2 -14   1 170.593 254.648   1
   2 -14  -1 107.684 267.123   1
  -2 -14  -1 709.486 302.945   1
  -2 -14   1 820.915 343.245   1
  -2  14   2 30679.8 1048.29   4
   2 -14   2 34247.1 1562.20   1
  -2 -14   2 32139.6 1454.93   1
   2 -14  -2 33111.7 1434.25   1
  -2 -14  -2 32482.5 1400.54   1
  -2 -14   3 837.679 326.195   1
  -2  14   3 946.794 199.680   4
  -2 -14  -3 1299.80 320.495   1
   2 -14   3 658.477 300.299   1
   2 -14  -3 683.466 206.176   1
   2  14   3 793.014 193.983   4
   2 -14   4 1986.70 415.786   1
  -2 -14   4 2099.89 470.821   1
  -2  14   4 1669.09 263.083   4
   2  14   4 2269.39 320.978   4
  -2  14   5 2917.89 385.409   4
  -2 -14   5 2849.70 539.697   1
   2  14   5 3053.79 392.257   4
   2 -14   5 2929.87 508.184   1
   2 -14   6 2749.42 518.165   1
   2  14   6 2865.98 379.815   4
  -2  14   6 3147.38 405.781   4
  -2 -14   6 2943.45 527.051   1
   2 -14   7 398.137 324.742   1
  -2 -14   7 21.6983 260.530   1
   2  14   7-377.881 346.465   4
  -2  14   7-473.990 310.148   4
   2 -14   8 4110.72 668.283   1
  -2  14   8 4254.54 473.708   4
  -2 -14   8 4544.23 708.967   1
   2  14   8 3247.31 410.301   4
  -2  14   9 67504.5 1953.05   4
   2 -14   9 67386.0 2690.86   1
   2  14   9 65515.8 1903.22   4
  -2 -14   9 69730.4 2735.77   1
   2  14  10 3098.18 504.115   4
  -2  14  10 3741.93 538.649   4
   2 -14  10 3168.15 616.486   1
   2  14  10 2367.00 354.369   2
  -2 -14  10 3140.61 669.492   1
  -2  14  11 44497.0 1661.86   4
  -2  14  11 42216.0 1455.96   2
   2  14  11 44731.8 1661.92   4
   2  14  11 45531.3 1527.82   2
  -2  14  12 165.734 223.169   4
  -2  14  12 335.356 228.767   2
   2  14  12-7.07843 182.673   2
   2  14  12 5.22851 245.598   4
   2  14  13 3580.57 523.569   4
   2  14  13 3553.03 445.649   2
  -2  14  13 4455.22 552.345   4
  -2  14  13 3959.08 471.028   2
   2  14  14 69.9608 249.909   4
  -2  14  14 622.744 312.973   4
  -2  14  14 205.428 182.848   2
   2  14  14 452.372 217.937   2
  -2  14  15 1711.94 325.119   2
   2  14  15 1851.26 331.757   2
   2  14  16 119.977 180.204   2
  -2  14  16 664.906 251.603   2
   2  14  17 1772.49 277.489   2
   2 -16   0 17138.2 1239.28   1
  -2 -16   0 18014.1 1223.09   1
   2 -16   1 224.312 285.533   1
  -2 -16   1 818.132 361.340   1
  -2 -16  -1 375.654 239.820   1
   2 -16  -1 604.257 262.700   1
   2 -16  -2 8225.86 852.298   1
   2 -16   2 8454.65 902.764   1
  -2 -16  -2 8839.60 855.297   1
   2  16   2 8257.16 593.991   4
  -2  16   2 8040.04 584.777   4
  -2 -16   2 7699.84 845.815   1
   2 -16   3 2660.55 532.642   1
  -2  16   3 2394.68 341.267   4
   2  16   3 2265.30 340.363   4
  -2 -16   3 2632.33 565.500   1
  -2 -16   4 11324.4 1047.74   1
   2 -16   4 10956.0 1056.03   1
   2  16   4 11663.9 738.626   4
  -2  16   4 10810.7 712.443   4
  -2 -16   5 8895.16 967.001   1
   2  16   5 8675.37 656.649   4
   2 -16   5 8592.88 954.790   1
  -2  16   5 8880.44 677.071   4
   2 -16   6 2462.35 590.296   1
   2  16   6 2214.42 349.383   4
  -2  16   6 1659.70 322.082   4
  -2 -16   6 2168.73 535.713   1
  -2  16   7 5496.53 512.109   4
   2 -16   7 5836.53 851.610   1
   2  16   7 4601.26 470.440   4
  -2 -16   7 6165.19 864.184   1
   2  16   8 392.503 198.433   4
  -2 -16   8 730.189 437.058   1
   2 -16   8 395.963 289.080   1
  -2  16   8 619.748 196.580   4
  -2  16   9 970.333 274.510   4
   2  16   9 1319.32 325.393   4
   2  16  10-206.313 260.819   4
  -2  16  10 99.6149 193.995   4
  -2  16  11 2078.06 382.351   4
   2  16  11 1814.84 378.035   4
  -2  16  12-152.067 247.580   4
   2  16  12-139.353 255.096   4
  -2  16  13 1950.35 369.223   4
   2  16  13 1645.26 345.780   4
  -2  16  14 1001.79 314.604   4
   2  16  14 801.776 254.444   4
   2 -18   0 2678.63 599.409   1
  -2 -18   0 2538.54 565.239   1
   2  18   1 10.2929 177.277   4
   2 -18  -1 158.186 281.947   1
  -2  18   1 143.213 165.611   4
   2 -18   1-170.027 341.913   1
  -2 -18   1-157.962 235.701   1
  -2 -18   2 536.615 335.297   1
   2  18   2 580.044 200.198   4
   2 -18   2 169.377 348.631   1
  -2  18   2 161.579 164.692   4
  -2  18   3 754.468 248.623   4
   2  18   3 854.779 251.646   4
  -2 -18   3 1559.29 561.428   1
   2 -18   3 821.038 404.124   1
   2  18   4 27912.3 1181.29   4
   2 -18   4 28887.5 1895.13   1
  -2 -18   4 27809.2 1832.72   1
  -2  18   4 27690.6 1186.40   4
  -2  18   5 16225.3 918.592   4
   2  18   5 16470.0 937.804   4
  -2  18   6 24832.1 1143.47   4
   2  18   6 24758.5 1148.24   4
  -2  18   7 11960.7 804.298   4
   2  18   7 11560.2 784.051   4
   2  18   8 148.514 185.042   4
  -2  18   8 482.952 232.397   4
   2  18   9 2541.80 413.672   4
  -2  18   9 2999.63 427.066   4
  -2  18  10 8.58841 181.687   4
   2  18  10 55.1532 185.656   4
   2  18  11 1692.76 336.580   4
  -2  18  11 2401.39 394.339   4
   2  18  12-63.4899 191.047   4
  -2  18  12 411.170 202.487   4
  -2  18  13 10055.8 705.111   4
   2  18  13 9137.46 672.969   4
   2  18  14 3476.76 412.538   4
  -2  20   0 3565.52 443.117   4
   2  20   0 3912.85 468.675   4
   2  20   1-126.116 218.410   4
  -2  20   1 109.910 171.961   4
   2  20  -1 183.692 178.636   4
  -2  20  -1-34.0624 168.920   4
  -2  20   2 796.207 236.901   4
   2  20   2 1214.33 255.552   4
  -2  20   3 2774.20 426.168   4
   2  20   3 2756.24 399.407   4
  -2  20   4 19566.3 1010.36   4
   2  20   4 18975.5 1004.48   4
   2  20   5 15586.1 912.925   4
  -2  20   5 15033.8 883.386   4
  -2  20   6 14744.8 881.618   4
   2  20   6 15865.3 913.165   4
   2  20   7 9188.35 699.435   4
  -2  20   7 9392.29 699.119   4
   2  20   8-162.973 162.005   4
  -2  20   8 84.4729 172.547   4
  -2  20   9 1612.58 300.169   4
   2  20   9 1600.03 322.215   4
   2  20  10 318.377 168.689   4
  -2  20  10 135.881 153.779   4
  -2  20  11 519.859 183.774   4
   2  20  11 821.897 216.021   4
  -2  20  12-130.518 140.398   4
   2  20  12-1.90892 143.687   4
   2  20  13 5393.50 462.470   4
  -2  20  13 5103.76 452.881   4
   2  22   0 10791.2 775.305   4
  -2  22   0 10637.5 751.325   4
   2  22  -1 307.860 224.463   4
  -2  22  -1-40.3232 182.553   4
   2  22   1 264.927 208.391   4
  -2  22   1-22.9191 166.652   4
  -2  22   2 7473.50 623.709   4
  -2  22  -2 8791.80 665.066   4
   2  22  -2 8363.18 677.090   4
   2  22   2 7769.26 645.049   4
   2  22   3 223.531 175.330   4
  -2  22   3 51.9073 174.509   4
  -2  22  -3 738.428 213.638   4
   2  22  -3 759.762 250.928   4
   2  22   4 412.366 165.139   4
  -2  22   4 499.144 182.754   4
  -2  22  -4 549.734 193.634   4
  -2  22   5 0.87793 144.796   4
   2  22   5-113.331 171.440   4
  -2  22   6-89.0942 176.476   4
   2  22   6-32.1372 171.028   4
  -2  22   7 939.970 247.024   4
   2  22   7 497.021 189.006   4
  -2  22   8 585.507 201.473   4
   2  22   8 357.735 180.026   4
  -2  22   9 3271.62 388.329   4
   2  22   9 3062.30 356.847   4
  -2  22  10 25.9658 126.109   4
   2  22  10 61.0197 117.238   4
   2  24   0 26521.6 1104.42   4
  -2  24   0 25035.7 1044.91   4
  -2  24   1 329.154 156.068   4
   2  24  -1 583.775 237.712   4
  -2  24  -1 813.655 236.858   4
   2  24   1 672.204 226.176   4
   2  24  -2 4547.14 463.783   4
  -2  24  -2 4867.14 458.016   4
  -2  24   2 4862.18 470.277   4
   2  24   2 4585.75 458.805   4
  -2  24  -3-79.9693 152.815   4
   2  24   3 258.624 171.312   4
  -2  24   3 80.7749 134.215   4
   2  24  -3-337.981 209.408   4
   2  24   4 1150.66 251.312   4
  -2  24   4 1172.32 241.057   4
   2  24  -4 1326.10 239.274   4
  -2  24  -4 1178.84 235.212   4
  -2  24   5 1283.09 256.898   4
   2  24  -5 1451.38 254.139   4
   2  24   5 1298.04 260.665   4
  -2  24  -5 1164.10 211.619   4
  -2  24   6 1039.75 219.758   4
  -2  24  -6 771.652 173.103   4
   2  24  -6 1275.11 236.993   4
   2  24   6 1025.70 235.277   4
   2  24  -7 47.0098 113.260   4
  -2  24   7-20.0349 127.230   4
   2  24   7-56.7534 116.218   4
  -3  -1   0 314.471 52.0594   1
  -3  -1  -1 597526. 1478.42   1
  -3   1   1 577759. 1944.77   1
  -3  -1   2 13738.3 371.298   1
  -3   1   2 15353.2 328.292   1
  -3  -1   3 3547.92 213.142   1
  -3   1   3 3723.01 175.817   1
  -3   1   4 24378.1 477.348   1
  -3  -1   4 23660.2 576.349   1
   3  -1   5 110177. 1157.87   1
  -3   1   5 107894. 1089.97   1
  -3  -1   5 108482. 1311.52   1
   3  -1   6 64495.5 969.958   1
  -3  -1   6 62942.6 1065.28   1
  -3   1   6 63388.8 905.908   1
  -3  -1   7 184.000 105.901   1
  -3   1   7 235.490 90.8447   1
   3  -1   7 356.276 111.518   1
  -3  -1   8 99286.3 1499.78   1
  -3   1   8 96010.1 1289.95   1
   3  -1   8 95673.8 1309.46   1
  -3  -1   9 42752.4 1033.62   1
   3   1  10 164463. 2547.36   2
   3  -1  10 160942. 2502.53   2
  -3  -1  10 167383. 2521.68   2
   3  -1  11 306.884 154.940   2
   3   1  11 639.326 199.281   2
  -3  -1  11 84.0172 190.138   2
  -3   1  11 166.605 174.128   2
   3   1  12 37754.1 1379.79   2
   3  -1  12 39691.8 1395.08   2
  -3  -1  12 39900.9 1385.85   2
  -3   1  12 37893.9 1332.78   2
  -3  -1  13 422.438 175.923   2
   3  -1  13 838.679 303.713   2
   3   1  13 653.372 275.025   2
  -3   1  13 379.462 165.757   2
  -3  -1  14 3938.64 486.855   2
   3  -1  14 3151.44 419.835   2
   3   1  14 3691.51 461.944   2
  -3   1  14 3177.82 447.653   2
   3   1  15 2165.61 354.679   2
  -3  -1  15 1871.47 388.736   2
  -3   1  15 2564.81 397.551   2
   3  -1  15 1858.06 359.814   2
  -3  -1  16 10996.1 828.082   2
   3   1  16 11158.9 823.764   2
  -3   1  16 12024.8 862.817   2
   3  -1  16 11374.3 845.314   2
  -3   1  17 1433.00 354.323   2
   3  -1  17 1162.63 299.381   2
  -3  -1  17 1402.22 358.933   2
   3   1  17 701.788 239.743   2
  -3   1  18 4370.38 559.358   2
   3   1  18 4115.58 520.217   2
   3  -1  18 4386.41 505.874   2
   3   1  19 24154.6 1094.91   2
   3  -1  19 21239.1 956.320   2
   3   1  20 5270.43 513.778   2
  -3  -3   0 505.772 93.8412   1
  -3  -3   1 8014.25 319.073   1
  -3  -3  -1 8286.76 270.984   1
  -3  -3  -2 13575.9 304.959   1
  -3  -3   2 12942.0 437.066   1
  -3  -3  -3 167816. 849.655   1
  -3  -3   3 174578. 1694.66   1
  -3  -3   4 5705.31 352.474   1
   3  -3   5-78.7400 117.264   1
  -3  -3   5 159.204 135.503   1
  -3  -3   6 5539.45 400.065   1
   3  -3   6 5502.59 347.559   1
  -3  -3   7 11457.8 580.501   1
   3  -3   7 11160.3 535.840   1
  -3  -3   8 2224.71 281.042   1
   3  -3   8 2290.99 280.659   1
  -3  -3   9 1174.10 241.751   1
   3  -3   9 1273.13 217.604   1
  -3   3  10 25025.0 1046.78   4
  -3   3  10 22405.6 915.535   2
   3   3  10 22007.5 936.379   2
   3   3  10 23587.8 1004.40   4
  -3  -3  10 24255.9 950.187   1
  -3  -3  11 729.292 190.040   2
  -3   3  11 508.840 162.744   2
   3  -3  11 457.865 159.231   2
   3   3  11 607.485 187.272   2
  -3  -3  12 11246.7 750.384   2
   3   3  12 11247.2 763.107   2
   3  -3  12 11437.2 760.467   2
  -3   3  12 10361.3 690.262   2
   3  -3  13-407.760 252.696   2
   3   3  13-155.778 223.566   2
  -3   3  13-500.862 315.805   2
  -3  -3  13 29.6052 174.747   2
   3   3  14 4015.61 553.592   2
   3  -3  14 3592.05 458.776   2
  -3   3  14 2899.09 412.329   2
  -3  -3  14 4003.51 516.806   2
   3  -3  15 1702.60 342.985   2
  -3   3  15 1348.98 288.978   2
  -3  -3  15 2547.45 455.491   2
   3   3  15 1618.12 309.631   2
   3   3  16-181.464 387.762   2
  -3   3  16 323.180 283.510   2
   3  -3  16 422.649 219.556   2
   3   3  17 1427.06 352.537   2
  -3   3  17 2015.90 403.505   2
   3   3  18 5926.73 611.289   2
  -3   3  18 6354.25 620.062   2
   3   3  19 3150.96 450.280   2
  -3   3  19 3480.60 465.154   2
   3   3  20 567.335 226.683   2
  -3  -5   0 2587.91 220.271   1
  -3  -5   1 274.870 108.371   1
  -3  -5  -1 421.567 98.1387   1
  -3  -5   2 9532.78 447.641   1
  -3  -5  -2 9898.12 364.456   1
  -3  -5   3 9122.28 448.372   1
  -3  -5  -3 8861.40 329.700   1
  -3  -5   4 37344.2 958.370   1
  -3  -5  -4 36787.0 584.466   1
  -3  -5   5 159924. 2090.93   1
  -3  -5   6 57673.3 1351.14   1
   3  -5   6 57366.3 1275.68   1
  -3  -5   7 2107.26 299.080   1
   3  -5   7 2166.21 283.646   1
  -3  -5   8 1327.09 265.767   1
   3  -5   8 1269.93 238.851   1
   3   5   9 11312.7 640.944   2
  -3  -5   9 12055.9 756.273   1
   3   5   9 10933.0 666.903   4
  -3   5   9 12257.2 690.735   4
  -3   5   9 11642.5 645.740   2
   3  -5   9 12395.3 719.679   1
   3   5  10 25949.6 1037.04   2
  -3  -5  10 26941.4 1159.02   1
   3   5  10 25852.7 1064.56   4
  -3   5  10 26745.1 1085.59   4
  -3   5  10 24833.9 996.074   2
   3  -5  10 26083.0 1086.06   1
  -3   5  11 1429.54 337.433   4
   3   5  11 1198.66 236.687   2
   3   5  11 1265.84 304.154   4
  -3  -5  11 1114.35 268.050   1
  -3   5  11 547.082 168.834   2
   3   5  12 1308.89 300.882   2
  -3   5  12 1237.13 375.920   4
   3   5  12 1910.28 386.326   4
   3   5  13 143.459 263.682   2
  -3   5  13-211.382 311.744   2
   3   5  14 17778.2 1059.54   2
  -3   5  14 15742.1 953.123   2
   3   5  15 1123.30 220.552   2
  -3   5  15 2112.30 373.206   2
  -3   5  16 43185.1 1647.96   2
   3   5  16 41870.4 1695.52   2
   3   5  17 15710.8 1044.24   2
  -3   5  17 14084.6 1019.00   2
   3   5  18 72.9592 188.935   2
  -3   5  18 484.296 326.846   2
  -3   5  19 5470.46 539.933   2
   3   5  19 5284.14 555.701   2
   3   5  20 1685.68 304.953   2
  -3  -7   0 1025.95 183.164   1
  -3  -7   1 34710.8 930.845   1
  -3  -7  -1 36970.0 886.369   1
  -3  -7   2 15156.0 626.479   1
  -3  -7  -2 14350.3 539.195   1
  -3  -7   3 19982.1 756.854   1
  -3  -7  -3 20941.0 637.069   1
  -3  -7   4 22507.0 839.588   1
  -3  -7  -4 23365.5 649.806   1
  -3  -7  -5 72788.0 1022.03   1
  -3  -7   5 79198.7 1648.08   1
  -3  -7   6 38234.3 1200.40   1
   3  -7   6 38385.2 1191.55   1
   3  -7   7 4309.07 430.956   1
  -3  -7   7 5210.45 502.263   1
   3  -7   8 5533.92 530.040   1
  -3   7   8 5586.98 471.132   4
  -3   7   8 4917.30 430.484   2
   3   7   8 5432.96 439.309   2
   3   7   8 5279.32 447.267   4
  -3  -7   8 5428.87 544.754   1
   3  -7   9 1499.01 318.805   1
  -3   7   9 2226.72 318.512   2
  -3  -7   9 1825.58 357.125   1
   3   7   9 1931.70 318.669   4
  -3   7   9 1671.62 299.644   4
   3   7   9 1723.44 292.740   2
  -3  -7  10 53896.2 1824.34   1
   3   7  10 51137.4 1516.99   4
   3   7  10 51480.2 1510.23   2
   3  -7  10 51968.3 1753.52   1
  -3   7  10 49952.9 1440.55   2
  -3   7  10 52723.2 1541.42   4
   3   7  11-196.293 207.370   2
  -3  -7  11-157.863 251.763   1
  -3   7  11-56.1999 212.268   4
   3   7  11-238.496 215.051   4
  -3   7  11-435.895 315.631   2
   3   7  12 598.025 268.468   4
  -3   7  12 286.983 241.935   4
  -3   7  12-212.412 289.653   2
   3   7  12 335.592 197.350   2
   3   7  13 2277.07 461.857   4
   3   7  13 2389.89 440.617   2
  -3   7  13 2982.60 517.093   4
   3   7  14 31863.8 1398.67   2
  -3   7  14 28462.9 1294.71   2
   3   7  15 18761.2 1134.66   2
  -3   7  15 20119.7 1115.80   2
  -3   7  16 50661.7 1759.05   2
   3   7  16 46330.0 1823.08   2
  -3   7  17 1863.89 507.204   2
   3   7  17 2509.78 476.262   2
   3   7  18 2311.37 418.696   2
  -3   7  18 2492.10 476.601   2
  -3   7  19 6985.90 601.578   2
   3   7  19 6008.78 558.513   2
   3   7  20 2325.61 331.240   2
  -3  -9   0 633.779 179.431   1
  -3  -9   1 4165.07 389.075   1
  -3  -9  -1 4229.18 366.789   1
  -3  -9  -2-173.961 134.401   1
  -3  -9   2-3.14963 146.099   1
  -3  -9   3 39173.4 1189.48   1
  -3  -9  -3 41380.7 1078.38   1
  -3  -9   4 652.633 245.032   1
  -3  -9  -4 651.213 157.720   1
   3  -9   5 4305.12 422.462   1
  -3  -9   5 4511.96 490.348   1
   3  -9   6 24470.1 1087.29   1
   3   9   6 23370.6 885.283   4
  -3  -9   6 24701.6 1088.01   1
  -3  -9   7 31089.1 1292.29   1
   3   9   7 31696.4 1078.13   4
  -3   9   7 32865.5 1082.50   4
   3  -9   7 31821.1 1289.99   1
  -3   9   8 7154.92 538.176   2
   3   9   8 8130.84 587.737   4
  -3  -9   8 8213.24 724.346   1
  -3   9   8 8325.52 590.511   4
   3  -9   8 8923.42 732.633   1
   3   9   8 7109.55 538.265   2
   3   9   9 218.160 192.371   4
  -3   9   9-372.988 256.628   2
   3   9   9 314.336 155.519   2
  -3   9   9 324.170 218.547   4
   3  -9   9 424.390 264.783   1
  -3  -9   9 226.998 233.969   1
  -3   9  10-354.498 257.908   2
   3   9  10 528.317 251.349   4
   3   9  10 341.573 203.292   2
  -3   9  10 379.653 202.463   4
   3  -9  10 589.374 319.840   1
  -3  -9  10 499.826 280.689   1
  -3   9  11-129.611 215.167   4
  -3  -9  11 224.270 233.745   1
   3  -9  11 56.2559 195.796   1
   3   9  11 17.8041 202.451   2
   3   9  11 227.500 234.503   4
  -3   9  11-161.787 242.605   2
  -3   9  12 593.911 172.676   2
   3   9  12 665.197 249.930   4
  -3   9  12 765.831 311.353   4
   3   9  12 961.866 295.284   2
   3   9  13 114.275 259.130   4
   3   9  13 394.541 291.976   2
  -3   9  13 410.723 307.129   4
  -3   9  13-370.949 287.963   2
   3   9  14 17025.6 1122.51   4
   3   9  14 16305.9 1035.78   2
  -3   9  14 17511.9 1037.70   2
  -3   9  15 7022.26 693.860   2
   3   9  15 6857.92 666.791   2
  -3   9  16 3254.22 485.636   2
   3   9  16 1972.41 394.643   2
  -3   9  17 672.364 308.020   2
   3   9  17-73.7131 228.025   2
   3   9  18 567.343 245.052   2
  -3   9  18 987.159 297.964   2
   3   9  19 728.352 235.606   2
  -3 -11   0 837.923 262.663   1
  -3 -11  -1 187522. 2736.95   1
  -3 -11   1 187716. 2808.49   1
  -3 -11   2 6683.22 569.338   1
  -3 -11  -2 6696.69 526.085   1
  -3 -11  -3 490.327 183.012   1
  -3 -11   3 320.844 240.112   1
  -3 -11   4 7336.94 634.188   1
  -3  11   4 6543.54 466.702   4
   3  11   4 6400.24 456.763   4
   3 -11   4 6739.64 605.292   1
  -3 -11  -4 7158.09 534.694   1
   3 -11   5 22220.9 1109.13   1
   3  11   5 20457.6 871.676   4
  -3 -11   5 20004.0 1055.46   1
  -3  11   5 20000.5 870.990   4
  -3 -11   6 37679.3 1486.63   1
   3  11   6 38093.0 1225.97   4
  -3  11   6 40612.0 1256.34   4
   3 -11   6 40824.9 1574.33   1
   3 -11   7 1366.07 358.917   1
   3  11   7 1027.65 218.106   2
   3  11   7 1143.48 234.352   4
  -3  11   7 587.916 132.429   2
  -3 -11   7 1514.11 327.739   1
  -3  11   7 1053.53 254.458   4
   3  11   8 22060.5 984.404   4
  -3 -11   8 21887.9 1271.48   1
   3  11   8 20790.7 940.903   2
  -3  11   8 21915.4 989.481   4
   3 -11   8 23203.6 1298.57   1
  -3  11   8 21248.7 937.966   2
  -3 -11   9 7630.72 798.739   1
   3  11   9 8015.36 624.599   2
   3  11   9 7319.30 633.271   4
   3 -11   9 7953.80 839.878   1
  -3  11   9 7269.37 566.737   2
  -3  11   9 7923.42 662.545   4
   3 -11  10 102959. 3009.71   1
   3  11  10 102062. 2273.49   2
  -3  11  10 102130. 2219.13   2
  -3 -11  10 101938. 3020.07   1
  -3  11  10 104078. 2380.82   4
   3  11  10 101698. 2324.15   4
  -3 -11  11 718.277 332.400   1
   3 -11  11 762.940 394.492   1
   3  11  11 1217.80 343.348   2
   3  11  11 1138.74 356.863   4
  -3  11  11 870.152 315.651   4
  -3  11  11 180.140 199.769   2
  -3  11  12 20728.8 1147.81   4
   3  11  12 19563.5 1124.37   4
  -3  11  12 20441.2 1070.38   2
   3  11  12 21709.9 1129.20   2
   3  11  13 123.143 265.275   2
  -3  11  13 357.073 225.585   2
   3  11  13 484.223 318.698   4
  -3  11  14 231.292 239.915   2
   3  11  14-198.150 321.412   2
   3  11  14 125.349 325.849   4
  -3  11  15 2636.16 437.047   2
   3  11  15 2298.77 402.660   2
  -3  11  16 7074.60 646.972   2
   3  11  16 6796.53 656.414   2
   3  11  17 451.235 205.506   2
  -3  11  17 1105.53 301.345   2
   3  11  18 990.465 295.174   2
  -3 -13   0 132.468 223.398   1
  -3 -13   1 154239. 2956.75   1
  -3 -13  -1 159482. 2924.97   1
  -3 -13  -2 1231.27 310.668   1
   3 -13   2 826.806 237.471   1
  -3 -13   2 1116.75 325.347   1
  -3 -13  -3 1334.54 353.296   1
  -3 -13   3 885.347 281.731   1
   3  13   3 946.204 200.822   4
   3 -13   3 890.855 268.981   1
  -3  13   3 1034.27 212.127   4
  -3  13   4 522.239 137.240   4
   3 -13   4 340.438 237.056   1
  -3 -13   5 16230.2 1069.22   1
  -3  13   5 15711.1 829.546   4
   3  13   5 15995.3 826.307   4
   3 -13   5 16256.4 1094.80   1
   3  13   6 11510.0 738.037   4
  -3 -13   6 11636.6 955.259   1
  -3  13   6 12133.8 745.170   4
   3 -13   6 11699.5 947.580   1
   3 -13   7 1989.52 427.287   1
  -3  13   7 2027.59 308.599   4
  -3 -13   7 2183.78 470.022   1
   3  13   7 1183.14 250.993   4
  -3  13   8 16138.8 907.077   4
   3  13   8 16299.1 889.290   4
  -3 -13   8 17313.1 1258.32   1
   3 -13   8 17043.5 1245.60   1
  -3 -13   9 8982.71 964.264   1
   3 -13   9 10688.7 1049.41   1
  -3  13   9 9018.51 642.071   2
   3  13   9 9879.66 699.509   2
   3  13   9 9343.12 744.529   4
  -3  13   9 10988.6 792.113   4
  -3  13  10 92416.3 2101.34   2
  -3 -13  10 88050.5 3046.20   1
  -3  13  10 93771.8 2313.87   4
   3  13  10 86889.9 2258.69   4
   3 -13  10 86349.2 3021.90   1
   3  13  10 93989.9 2158.06   2
   3  13  11 590.920 359.546   4
  -3 -13  11 130.874 295.806   1
   3 -13  11-282.140 312.631   1
   3  13  11 3.54794 214.507   2
  -3  13  11-1.43061 166.068   2
  -3  13  11 547.795 310.301   4
   3  13  12 19810.1 1071.69   2
  -3  13  12 20165.2 1145.88   4
   3  13  12 18263.3 1099.74   4
  -3  13  12 19135.8 1006.77   2
   3  13  13-407.347 276.441   2
  -3  13  13-21.7548 223.588   4
  -3  13  13 124.989 205.733   2
   3  13  13-215.678 278.997   4
   3  13  14 10372.2 789.026   2
  -3  13  14 11975.7 894.594   4
  -3  13  14 10675.9 762.721   2
   3  13  14 9997.36 838.835   4
  -3  13  15 4628.18 535.214   2
   3  13  15 5070.82 547.242   2
   3  13  16 5394.19 558.780   2
  -3  13  16 6448.06 577.697   2
   3  13  17 185.414 166.931   2
  -3 -15   0 323.992 260.163   1
   3 -15   0-152.951 247.572   1
  -3 -15  -1 14700.8 1030.45   1
   3 -15  -1 14181.8 1018.11   1
   3 -15   1 14415.9 1079.00   1
  -3 -15   1 13988.3 1033.96   1
  -3 -15  -2 637.281 252.006   1
   3 -15  -2 714.942 218.452   1
   3  15   2 615.202 199.063   4
   3 -15   2 937.256 295.086   1
  -3  15   2 623.812 173.519   4
  -3 -15   2 1008.57 365.007   1
   3 -15   3 2489.69 457.119   1
   3 -15  -3 2551.65 459.295   1
   3  15   3 2685.89 359.579   4
  -3  15   3 2701.93 350.678   4
  -3 -15   3 3134.11 554.446   1
   3  15   4 14.6511 149.280   4
   3 -15   4 631.085 358.825   1
  -3  15   4 375.334 185.923   4
  -3  15   5 426.517 195.843   4
   3  15   5 356.207 206.747   4
   3 -15   5 197.214 243.032   1
  -3 -15   5 467.873 371.714   1
   3 -15   6 533.371 325.558   1
  -3 -15   6 254.521 223.463   1
   3  15   6 487.272 204.732   4
  -3  15   6 579.437 226.644   4
   3  15   7 77.7807 313.305   4
   3 -15   7 888.367 414.999   1
  -3 -15   7 683.362 364.370   1
  -3  15   7 425.279 208.391   4
   3 -15   8 3134.63 628.063   1
   3  15   8 1932.87 298.250   4
  -3 -15   8 2185.85 543.582   1
  -3  15   8 1971.17 307.032   4
   3  15   9 4229.89 517.627   4
  -3 -15   9 3308.90 649.512   1
   3 -15   9 3492.98 660.475   1
  -3  15   9 4365.74 547.123   4
  -3  15  10 16864.9 1009.53   4
   3  15  10 16327.5 1017.39   4
  -3  15  11 458.608 238.657   4
   3  15  11 440.538 229.882   4
   3  15  12 4800.22 503.363   2
  -3  15  12 4440.44 548.118   4
   3  15  12 4760.52 571.440   4
  -3  15  13 734.793 237.829   2
  -3  15  13 353.334 254.720   4
   3  15  13-28.7558 245.133   4
   3  15  13 221.853 159.064   2
  -3  15  14 261.472 265.855   4
   3  15  14-51.2732 217.822   4
   3  15  14 261.784 183.964   2
  -3  15  14 561.410 231.218   2
   3  15  15 248.389 188.384   2
   3  15  16 198.955 156.892   2
  -3 -17   0 1000.00 440.952   1
   3 -17   0 711.456 384.872   1
   3 -17  -1 519.239 318.664   1
   3 -17   1 374.330 338.951   1
  -3 -17  -1 448.262 301.720   1
  -3  17   1 654.378 232.493   4
  -3 -17   1 1039.07 435.218   1
  -3 -17   2 169.791 228.870   1
   3 -17  -2 109.719 251.195   1
  -3  17   2 36.3023 176.211   4
   3  17   2-23.3698 150.637   4
   3 -17   2-47.8906 316.061   1
   3 -17   3 4903.39 787.586   1
  -3 -17   3 4482.40 705.094   1
  -3  17   3 3796.08 448.184   4
   3  17   3 3628.37 443.702   4
   3  17   4 3301.61 421.041   4
  -3  17   4 2962.17 408.263   4
   3 -17   4 3102.10 655.541   1
  -3 -17   4 3402.89 650.973   1
   3  17   5 19186.7 975.002   4
  -3 -17   5 18479.1 1451.78   1
  -3  17   5 18800.3 981.922   4
   3 -17   5 19498.1 1477.22   1
   3  17   6 13598.5 848.721   4
  -3 -17   6 12860.1 1252.25   1
  -3  17   6 13197.3 839.592   4
   3 -17   6 14297.7 1320.63   1
   3  17   7 5861.97 583.420   4
  -3  17   7 5971.21 567.156   4
  -3  17   8 4395.71 514.430   4
   3  17   8 4681.18 530.726   4
  -3  17   9 982.351 273.806   4
   3  17   9 1155.84 284.127   4
   3  17  10 4812.99 540.843   4
  -3  17  10 4565.62 532.249   4
   3  17  11-133.102 220.355   4
  -3  17  11-181.261 238.600   4
   3  17  12 598.314 219.312   4
  -3  17  12 1386.36 330.484   4
   3  17  13-205.018 196.168   4
  -3  17  13 144.354 208.029   4
  -3  17  14 7193.62 597.758   4
   3  17  14 7051.19 588.708   4
  -3  19   0 159.987 203.567   4
   3 -19   0-1.18533 346.282   1
   3  19   0-139.250 172.370   4
   3  19   1 12435.1 790.973   4
  -3  19   1 11870.0 788.339   4
   3  19   2-221.921 204.673   4
  -3  19   2-330.168 258.192   4
  -3  19   3 10178.5 741.178   4
   3  19   3 10671.5 755.563   4
   3  19   4 8479.62 672.272   4
  -3  19   4 8475.56 686.690   4
  -3  19   5 28446.9 1236.87   4
   3  19   5 29540.5 1228.56   4
   3  19   6 25601.9 1178.31   4
  -3  19   6 25530.6 1144.00   4
  -3  19   7 3903.28 477.868   4
   3  19   7 3710.85 471.545   4
   3  19   8 39.3890 192.008   4
  -3  19   8 227.912 208.432   4
  -3  19   9 428.722 218.204   4
   3  19   9 661.406 261.709   4
  -3  19  10 15451.0 910.680   4
   3  19  10 15477.1 895.683   4
   3  19  11 16.3715 196.057   4
  -3  19  11 149.904 160.764   4
  -3  19  12-258.712 178.211   4
   3  19  12 16.7613 155.331   4
  -3  19  13 760.925 237.555   4
   3  19  13 251.443 136.692   4
   3  19  14 13056.4 692.221   4
  -3  21   0 92.7787 168.250   4
   3  21   0 56.2339 196.754   4
   3  21   1-97.7952 189.799   4
  -3  21  -1 95.8964 153.165   4
  -3  21   1 204.437 163.787   4
   3  21  -1 234.981 205.841   4
   3  21  -2 489.684 233.885   4
  -3  21   2-54.3650 159.206   4
  -3  21  -2 328.215 198.364   4
   3  21   2 48.2455 171.474   4
   3  21   3 3057.97 427.747   4
  -3  21   3 3336.61 436.995   4
  -3  21   4 1161.95 272.851   4
   3  21   4 1343.16 286.691   4
  -3  21   5 3346.58 421.553   4
   3  21   5 3776.51 460.849   4
  -3  21   6 1246.60 248.516   4
   3  21   6 1710.88 297.568   4
  -3  21   7 270.502 196.521   4
   3  21   7 340.550 156.277   4
  -3  21   8 190.985 204.559   4
   3  21   8-19.3990 154.973   4
  -3  21   9 68.4101 134.256   4
   3  21   9-238.306 181.831   4
   3  21  10-414.790 214.220   4
  -3  21  10-469.200 212.881   4
   3  21  11-285.614 176.621   4
  -3  21  11 107.481 125.384   4
   3  21  12 667.212 160.301   4
   3  23   0 433.160 244.339   4
  -3  23   0 4.40634 161.966   4
   3  23   1 16123.9 887.463   4
  -3  23   1 14379.5 840.743   4
  -3  23  -1 14714.5 842.108   4
   3  23  -1 16074.1 898.808   4
   3  23  -2 672.894 240.534   4
  -3  23   2 310.159 183.228   4
   3  23   2 390.849 186.748   4
  -3  23  -2 249.580 158.238   4
   3  23   3-112.129 184.063   4
  -3  23  -3-330.417 190.542   4
  -3  23   3-18.5513 157.827   4
   3  23  -3-167.336 230.451   4
  -3  23   4 222.995 182.103   4
  -3  23  -4 62.0110 126.580   4
   3  23  -4 87.5746 152.567   4
   3  23   4 157.151 179.382   4
  -3  23  -5 4563.00 431.781   4
   3  23   5 3989.46 432.793   4
   3  23  -5 4615.36 477.020   4
  -3  23   5 3669.12 430.677   4
   3  23   6 2512.18 348.892   4
  -3  23  -6 3196.26 352.453   4
  -3  23   6 2445.20 347.115   4
  -3  23   7-258.519 152.317   4
  -3  23  -7 24.6840 114.427   4
   3  23   7 12.7363 148.789   4
  -3  23   8 632.127 196.128   4
   3  23   8 535.896 157.290   4
   3  23   9 407.441 147.398   4
  -3  25   0 237.799 128.037   4
   3  25   0 402.398 184.751   4
   3  25   1 11228.7 681.155   4
  -3  25   1 9199.59 574.301   4
   3  25  -1 11591.4 673.602   4
  -3  25  -1 8470.56 541.425   4
   3  25  -2 217.789 131.943   4
  -3  25   2 114.172 108.928   4
  -3  25  -2 175.707 133.980   4
  -3  25  -3 101.003 104.587   4
   3  25   3 309.470 160.978   4
   3  25  -3 48.1488 134.998   4
  -3  25   3-160.859 129.426   4
   3  25  -4 797.303 196.988   4
   3  25   4 962.762 215.393   4
   3  25   5 3946.40 375.017   4
  -4   0   0 618385. 1930.34   1
  -4   0   1 3497.30 160.715   1
  -4   0  -1 3498.86 149.280   1
  -4   0   2 467288. 2002.04   1
  -4   0   3 2193.24 160.648   1
  -4   0   4 402632. 2164.38   1
   4   0   5 64966.3 723.996   1
  -4   0   5 63720.4 937.907   1
   4   0   6 162937. 1256.36   1
  -4   0   6 166175. 1611.42   1
  -4   0   7 14673.5 508.199   1
   4   0   7 12723.9 357.726   1
  -4   0   8 8196.61 405.640   1
  -4   0   9 365125. 2884.87   1
   4   0  10 8426.31 583.782   2
  -4   0  10 8181.65 565.488   2
   4   0  11 53867.7 1552.79   2
  -4   0  11 55895.3 1535.26   2
   4   0  12 1235.88 313.358   2
  -4   0  12 647.979 226.742   2
   4   0  13 1438.99 320.281   2
  -4   0  13 1482.67 309.563   2
   4   0  14 2169.45 416.858   2
  -4   0  14 1552.61 355.404   2
   4   0  15 45359.0 1673.24   2
  -4   0  15 45677.8 1668.47   2
   4   0  16 22026.2 1163.20   2
  -4   0  16 21702.0 1151.85   2
   4   0  17 4064.18 536.691   2
  -4   0  17 4822.11 588.953   2
   4   0  18 180.775 205.086   2
  -4   0  18 628.007 309.604   2
   4   0  19 20026.0 960.589   2
  -4  -2   0 122334. 1080.08   1
  -4  -2  -1 7762.13 241.811   1
  -4  -2   1 7191.98 296.142   1
  -4  -2   2 35118.7 677.005   1
  -4  -2  -2 35143.3 400.511   1
  -4  -2   3 37.4500 105.096   1
  -4   2   3 31.5976 59.7941   1
  -4   2   4 18354.6 471.773   1
  -4  -2   4 17590.5 559.873   1
  -4  -2   5 25875.9 724.105   1
  -4   2   5 25593.8 580.459   1
  -4   2   6 302.553 84.2088   1
   4  -2   6 334.047 107.059   1
  -4  -2   6 418.847 136.840   1
   4  -2   7 2017.89 226.145   1
  -4   2   7 1794.22 184.199   1
  -4  -2   7 1724.06 221.013   1
   4  -2   8 20441.5 706.152   1
  -4   2   8 18492.8 601.126   1
  -4  -2   8 19786.6 754.594   1
  -4  -2   9 49910.9 1240.82   1
   4   2  10 2691.88 386.418   4
  -4   2  10 1925.45 280.563   2
   4   2  10 1780.43 280.023   2
  -4  -2  10 2075.73 289.355   2
  -4  -2  10 2302.00 288.275   1
   4  -2  11 22331.1 1003.72   2
   4   2  11 22647.5 1030.39   2
  -4  -2  11 24505.5 1052.96   2
  -4   2  11 24170.7 1000.71   2
   4  -2  12 338.943 205.137   2
   4   2  12 111.242 177.045   2
  -4   2  12 38.9386 198.480   2
  -4  -2  12 241.620 168.126   2
  -4  -2  13 380.400 210.252   2
  -4   2  13-36.2375 226.713   2
   4   2  13 3.09117 199.359   2
   4  -2  13 354.437 263.794   2
  -4   2  14 507.285 224.749   2
  -4  -2  14 1352.88 359.553   2
   4  -2  14 1334.86 267.224   2
   4   2  14 1089.62 310.706   2
  -4  -2  15 12162.7 855.693   2
   4   2  15 11648.3 854.409   2
   4  -2  15 12000.5 841.208   2
  -4   2  15 11100.6 852.275   2
  -4  -2  16 3992.12 507.824   2
   4  -2  16 3543.16 473.872   2
   4   2  16 2937.42 444.416   2
  -4   2  16 2839.57 534.327   2
  -4  -2  17 2407.75 419.680   2
   4   2  17 1851.27 381.351   2
   4  -2  17 2369.82 397.164   2
  -4   2  17 2555.00 469.816   2
   4   2  18 10998.6 832.390   2
   4  -2  18 9527.06 681.858   2
   4   2  19 1425.63 322.660   2
   4   2  20 8812.53 593.674   2
  -4  -4   0 220619. 1784.86   1
  -4  -4  -1 7766.98 320.516   1
  -4  -4   1 7348.64 360.097   1
  -4  -4  -2 52919.9 767.223   1
  -4  -4   2 51353.4 964.670   1
  -4  -4   3 2534.31 261.559   1
  -4  -4  -3 2486.89 158.473   1
  -4  -4   4 55920.9 1132.80   1
  -4  -4   5 5910.63 413.665   1
   4  -4   6 1029.22 162.455   1
  -4  -4   6 1302.88 242.445   1
  -4  -4   7 3960.61 394.988   1
   4  -4   7 4076.52 354.179   1
   4  -4   8 2399.18 305.985   1
  -4  -4   8 1931.54 283.614   1
  -4   4   9 22082.4 938.586   4
  -4  -4   9 24462.6 1016.25   1
   4  -4   9 24712.9 957.109   1
   4   4   9 21330.0 930.313   4
   4   4   9 23130.2 917.422   2
  -4   4   9 22167.5 868.115   2
  -4   4  10 284.114 193.849   4
  -4   4  10-206.227 212.219   2
  -4  -4  10 126.168 148.224   1
   4   4  10-118.316 138.170   2
   4   4  10 122.928 151.322   4
  -4   4  11 497.643 192.158   2
   4  -4  11 857.095 218.900   2
   4   4  11 461.614 151.584   2
   4   4  11 1216.34 281.742   4
  -4   4  11 1576.06 346.854   4
  -4  -4  11 1053.03 261.029   2
  -4   4  12-524.343 287.853   2
   4  -4  12-267.177 201.950   2
   4   4  12-170.542 217.441   2
  -4  -4  12 251.738 204.308   2
   4   4  13 130.790 228.078   2
  -4  -4  13 149.927 236.410   2
  -4   4  13-0.96915 212.418   2
  -4  -4  14 1606.86 363.605   2
  -4   4  14 1115.84 285.318   2
  -4   4  15 6623.93 690.213   2
   4   4  15 7682.23 669.246   2
  -4  -4  15 8013.48 692.400   2
   4   4  16 3255.11 453.417   2
  -4   4  16 2753.53 474.724   2
  -4   4  17 11978.8 881.472   2
   4   4  17 12506.1 888.546   2
   4   4  18-178.025 247.555   2
  -4   4  18 945.773 350.278   2
   4   4  19 2356.20 392.710   2
   4   4  20 9281.06 621.202   2
  -4  -6   0 245478. 2230.79   1
  -4  -6   1 1669.67 226.223   1
  -4  -6  -1 2075.19 221.191   1
  -4  -6   2 8936.34 478.898   1
  -4  -6  -2 8872.73 406.382   1
  -4  -6  -3 3416.03 249.936   1
  -4  -6   3 3164.58 324.234   1
  -4  -6  -4 785.588 128.656   1
  -4  -6   4 881.431 205.271   1
  -4  -6  -5 62621.6 718.277   1
  -4  -6   5 80067.3 1587.94   1
  -4  -6   6 74227.3 1636.90   1
   4  -6   6 74500.4 1556.41   1
   4  -6   7 334.641 162.739   1
  -4  -6   7 544.931 245.205   1
  -4  -6   8 10547.6 724.010   1
   4  -6   8 9932.37 653.433   1
  -4   6   9 101808. 1950.34   2
   4   6   9 103368. 2024.45   2
   4  -6   9 101788. 2175.42   1
  -4  -6   9 108307. 2360.46   1
   4   6   9 103854. 2026.76   4
  -4   6   9 105231. 2030.74   4
  -4   6  10 10548.4 704.328   4
  -4  -6  10 11273.9 807.767   1
   4   6  10 10530.3 697.916   4
   4  -6  10 10751.4 758.151   1
   4   6  10 11141.9 698.214   2
  -4   6  10 9673.07 632.392   2
   4   6  11 43173.5 1467.82   2
  -4   6  11 39624.3 1346.78   2
  -4   6  11 43215.5 1478.96   4
   4   6  11 43485.7 1484.16   4
  -4  -6  11 43652.2 1610.98   1
  -4   6  12 40.3051 240.261   4
   4   6  12 67.5944 171.324   2
   4   6  12 335.548 265.402   4
  -4   6  12-232.290 263.130   2
  -4   6  13 1218.17 250.051   2
   4   6  13 1652.76 374.473   2
   4   6  14 1138.24 399.025   2
  -4   6  14 113.227 242.757   2
   4   6  15 36797.5 1553.11   2
  -4   6  15 38442.0 1518.87   2
  -4   6  16 24764.9 1234.22   2
   4   6  16 24820.8 1308.28   2
  -4   6  17 2814.41 520.713   2
   4   6  17 2200.99 412.178   2
   4   6  18 2608.94 407.446   2
  -4   6  18 3031.93 499.837   2
   4   6  19 4427.16 510.815   2
   4   6  20 20683.5 878.344   2
  -4  -8   0 13776.1 631.917   1
  -4  -8  -1 3800.46 330.295   1
  -4  -8   1 3747.72 360.016   1
  -4  -8  -2 6753.22 420.347   1
  -4  -8   2 6175.36 456.080   1
  -4  -8  -3 3012.39 278.399   1
  -4  -8   3 2706.93 321.152   1
  -4  -8   4 23650.2 930.578   1
  -4  -8  -4 24834.7 753.389   1
  -4  -8   5 1008.82 258.600   1
   4  -8   6 4712.75 439.501   1
  -4  -8   6 4874.44 490.563   1
   4  -8   7 18091.8 925.885   1
   4   8   7 17571.7 775.685   4
  -4  -8   7 17072.0 937.942   1
  -4  -8   8 1203.83 323.306   1
   4   8   8 1474.38 253.834   4
  -4   8   8 945.870 214.188   4
   4  -8   8 1245.10 285.972   1
   4   8   8 1096.28 246.453   2
  -4   8   8 1082.96 204.941   2
   4   8   9 30212.9 1143.78   2
  -4   8   9 29275.9 1084.53   2
   4   8   9 29491.5 1128.49   4
   4  -8   9 30574.4 1352.36   1
  -4   8   9 29427.2 1143.67   4
  -4  -8   9 31516.3 1416.58   1
   4   8  10 147.990 151.678   2
  -4   8  10-249.128 261.121   2
   4  -8  10 249.113 207.466   1
  -4  -8  10 269.292 247.686   1
  -4   8  10 63.4956 194.245   4
   4   8  10 295.739 207.448   4
  -4  -8  11 11210.2 915.483   1
  -4   8  11 9752.00 688.317   2
   4   8  11 11103.7 775.336   2
  -4   8  11 11818.5 796.560   4
   4   8  11 11045.4 774.653   4
   4   8  12 496.277 266.212   2
  -4   8  12 439.792 288.579   4
   4   8  12 660.713 289.517   4
  -4   8  13 5225.83 631.002   4
   4   8  13 5343.92 614.162   4
   4   8  13 5276.47 615.746   2
  -4   8  13 4317.88 491.724   2
   4   8  14 5896.34 728.653   4
  -4   8  14 3986.07 543.384   2
   4   8  14 5154.35 606.534   2
   4   8  15 52465.1 1878.55   2
  -4   8  15 53676.4 1812.06   2
   4   8  16 3898.08 499.933   2
  -4   8  16 4365.89 582.023   2
  -4   8  17 185.377 266.277   2
   4   8  17 170.331 227.533   2
   4   8  18 3035.29 440.894   2
  -4   8  18 4209.21 505.043   2
   4   8  19 2610.76 373.364   2
  -4 -10   0 31412.7 1062.48   1
  -4 -10  -1 1775.09 282.778   1
  -4 -10   1 1949.66 296.347   1
  -4 -10  -2 8162.98 538.994   1
  -4 -10   2 7799.83 577.944   1
  -4 -10  -3 2772.11 329.943   1
  -4 -10   3 2621.87 371.776   1
  -4 -10  -4 8886.19 548.571   1
  -4 -10   4 8131.37 628.869   1
   4 -10   5 46540.8 1519.05   1
  -4 -10   5 42177.5 1439.46   1
   4  10   5 42729.0 1205.49   4
   4 -10   6 24454.6 1167.25   1
   4  10   6 23713.1 933.095   4
  -4 -10   6 22698.7 1099.69   1
  -4  10   6 23335.3 925.973   4
   4  10   7 1068.50 209.937   4
   4  10   7 762.224 205.722   2
   4 -10   7 1076.43 313.541   1
  -4  10   7 669.314 168.868   2
  -4  10   7 1081.64 225.720   4
  -4 -10   7 1141.49 321.938   1
   4  10   8 652.399 161.430   2
  -4 -10   8 178.829 231.161   1
   4  10   8 243.252 144.683   4
   4 -10   8 229.017 178.438   1
  -4  10   8 213.846 150.248   4
  -4  10   8 48.3335 159.796   2
  -4 -10   9 3495.11 519.468   1
   4 -10   9 3997.74 594.237   1
   4  10   9 3656.19 441.717   4
  -4  10   9 3557.34 409.630   2
  -4  10   9 4153.44 459.673   4
   4  10   9 3851.26 441.100   2
   4  10  10 545.547 229.178   2
   4  10  10 550.974 271.830   4
   4 -10  10 444.340 256.645   1
  -4 -10  10 174.630 242.505   1
  -4  10  10 348.241 244.254   4
  -4  10  10 198.022 149.766   2
  -4 -10  11 12175.5 1047.33   1
  -4  10  11 13232.0 871.555   4
   4  10  11 14427.3 910.471   4
  -4  10  11 12836.0 812.318   2
   4  10  11 14626.4 898.558   2
   4 -10  11 12205.7 1030.17   1
   4  10  12 172.741 224.075   4
  -4  10  12 626.705 331.333   4
  -4 -10  12-64.3332 263.375   1
   4  10  12 515.083 252.388   2
  -4  10  12 293.301 206.612   2
  -4  10  13 1434.34 405.942   4
   4  10  13 1111.20 341.012   4
   4  10  13 1375.60 366.874   2
  -4  10  13 1042.85 275.216   2
   4  10  14 1139.33 395.464   4
   4  10  14 99.1758 316.436   2
  -4  10  14 557.150 316.651   2
  -4  10  15 3499.50 488.087   2
   4  10  15 3109.14 460.097   2
  -4  10  16 2004.16 400.380   2
   4  10  16 1225.61 286.245   2
  -4  10  17 2458.27 442.784   2
   4  10  17 1029.20 317.203   2
   4  10  18 171.179 164.426   2
   4  10  19 514.921 193.914   2
  -4 -12   0 213104. 3187.70   1
  -4 -12   1 2062.44 366.993   1
  -4 -12  -1 1641.35 307.268   1
  -4 -12   2 58322.4 1728.97   1
  -4 -12  -2 59936.4 1660.52   1
  -4 -12  -3 820.822 251.280   1
  -4 -12   3 825.304 301.774   1
   4  12   3 596.923 168.278   4
  -4  12   3 615.435 165.607   4
  -4  12   4 51030.8 1372.52   4
   4  12   4 48754.5 1328.71   4
  -4 -12   4 53172.1 1748.90   1
   4 -12   4 53601.6 1790.18   1
  -4  12   5 24227.5 981.967   4
  -4 -12   5 23012.1 1204.17   1
   4 -12   5 24840.0 1277.49   1
   4  12   5 22071.2 937.775   4
  -4  12   6 28009.6 1086.06   4
  -4 -12   6 26477.3 1314.29   1
   4  12   6 26089.7 1041.74   4
   4 -12   6 28183.2 1399.55   1
   4  12   7 16188.9 858.223   4
  -4 -12   7 17203.5 1127.69   1
  -4  12   7 17704.3 884.968   4
   4 -12   7 18338.7 1179.46   1
   4  12   8 2099.65 322.856   4
  -4 -12   8 2843.88 555.610   1
   4 -12   8 2220.61 474.989   1
   4  12   8 2095.26 315.871   2
  -4  12   8 1576.05 270.613   2
  -4  12   8 1986.66 341.133   4
  -4  12   9 66211.2 1871.24   4
   4 -12   9 68148.0 2469.53   1
  -4 -12   9 64913.9 2396.09   1
   4  12   9 62651.2 1801.26   4
  -4  12   9 66881.0 1737.90   2
   4  12   9 67170.3 1780.28   2
   4 -12  10 4796.10 710.975   1
   4  12  10 4730.03 571.626   4
  -4  12  10 5071.49 498.276   2
  -4  12  10 5653.70 627.007   4
  -4 -12  10 4606.93 683.890   1
   4  12  10 5352.08 561.738   2
   4  12  11 70761.6 1993.71   2
   4  12  11 67021.6 1986.79   4
  -4 -12  11 56803.0 2426.91   1
  -4  12  11 68107.8 2035.97   4
  -4  12  11 64483.5 1841.42   2
   4 -12  11 54437.1 2396.78   1
   4  12  12-420.731 265.815   2
  -4  12  12 360.536 249.560   4
   4  12  12-28.5115 252.396   4
  -4  12  12-88.4970 186.398   2
   4  12  13 125.506 226.650   2
  -4  12  13 716.932 298.951   2
  -4  12  13 1007.72 335.206   4
   4  12  13 477.127 280.611   4
   4  12  14 2790.77 505.460   4
  -4  12  14 3461.48 541.194   4
   4  12  14 2308.91 385.848   2
  -4  12  14 3097.42 450.697   2
   4  12  15 29534.8 1340.06   2
  -4  12  15 26317.5 1213.43   2
   4  12  16 7762.10 662.532   2
  -4  12  16 8059.21 678.688   2
   4  12  17 2322.88 357.220   2
   4  12  18 1634.20 282.126   2
  -4 -14   0 87116.1 2358.11   1
  -4 -14   1 2573.05 443.862   1
  -4 -14  -1 2651.04 461.930   1
   4 -14   2-581.707 358.030   1
  -4 -14  -2 129.886 226.797   1
  -4 -14   2-189.890 205.393   1
  -4  14   2-98.0907 133.748   4
   4 -14   3 1950.26 404.385   1
  -4  14   3 1791.36 274.167   4
  -4 -14  -3 2378.71 447.712   1
   4  14   3 1822.82 274.726   4
  -4 -14   3 2284.46 471.857   1
   4  14   4 3922.48 425.984   4
   4 -14   4 5551.77 673.877   1
  -4 -14   4 5223.05 666.256   1
  -4  14   4 5225.15 489.747   4
  -4 -14   5 2723.36 497.048   1
  -4  14   5 2844.45 389.319   4
   4  14   5 2238.47 351.919   4
   4 -14   5 1730.51 434.348   1
  -4  14   6 7686.70 618.690   4
   4 -14   6 7280.33 816.094   1
   4  14   6 7364.81 602.577   4
  -4 -14   6 5809.56 695.896   1
   4  14   7 132.560 254.601   4
  -4  14   7 1207.38 262.050   4
   4 -14   7 1112.98 367.583   1
  -4 -14   7 1115.19 389.502   1
   4 -14   8 1608.63 480.918   1
   4  14   8 838.728 225.646   4
  -4  14   8 1040.91 279.804   4
  -4 -14   8 1337.53 417.515   1
  -4  14   9 31695.9 1329.66   4
   4  14   9 28964.0 1267.25   4
  -4 -14   9 30552.9 1789.78   1
   4 -14   9 30800.1 1813.91   1
   4  14  10 742.436 173.733   2
  -4 -14  10 1749.23 497.999   1
   4  14  10 1174.52 333.945   4
   4 -14  10 1713.89 474.005   1
  -4  14  10 1811.30 403.258   4
   4  14  11 11753.7 788.311   2
  -4  14  11 11918.0 868.681   4
   4  14  11 11891.1 871.315   4
  -4  14  11 10210.3 719.641   2
  -4  14  12 93.9806 167.821   2
   4  14  12-461.384 278.463   2
  -4  14  12 203.960 216.002   4
   4  14  12 13.3646 272.068   4
  -4  14  13 3249.31 484.978   4
   4  14  13 2969.99 419.492   2
   4  14  13 2341.45 400.888   4
  -4  14  13 3370.42 442.392   2
  -4  14  14 1101.04 295.471   2
  -4  14  14 909.052 341.685   4
   4  14  14 394.465 245.809   4
   4  14  14 317.861 218.395   2
   4  14  15 11814.7 803.788   2
  -4  14  15 12139.3 740.889   2
   4  14  16 2325.49 362.153   2
   4  14  17 273.766 160.349   2
  -4 -16   0 594.791 332.561   1
   4 -16   0-8.50762 247.094   1
  -4 -16   1 677.011 379.530   1
  -4  16   1 249.471 135.661   4
   4 -16   1-288.433 304.877   1
  -4 -16  -1 530.464 322.442   1
   4 -16  -1-62.2477 232.734   1
   4 -16   2 2338.58 521.498   1
  -4  16   2 2568.66 335.387   4
   4  16   2 2619.95 349.531   4
  -4 -16   2 2299.42 507.787   1
   4 -16  -2 2529.06 475.340   1
   4 -16  -3 292.464 226.578   1
   4 -16   3-43.2320 306.461   1
  -4  16   3 164.782 137.489   4
   4  16   3 159.815 166.107   4
  -4 -16   3 304.605 305.989   1
  -4  16   4 2953.59 402.983   4
   4 -16   4 2378.01 547.200   1
   4  16   4 2328.77 363.707   4
  -4 -16   4 2161.25 531.553   1
   4  16   5 727.426 230.007   4
  -4  16   5 547.977 220.454   4
   4 -16   5 643.786 383.873   1
  -4 -16   5 564.095 285.595   1
   4  16   6 1408.48 310.681   4
   4 -16   6 2166.26 578.664   1
  -4  16   6 937.285 208.411   4
  -4 -16   6 1124.71 456.325   1
   4 -16   7 2677.02 593.514   1
   4  16   7 1537.29 248.170   4
  -4 -16   7 1441.19 502.398   1
  -4  16   7 1570.91 291.449   4
   4  16   8 2091.47 346.206   4
  -4  16   8 2196.27 381.157   4
  -4  16   9-6.85923 218.377   4
   4  16   9 116.760 184.388   4
  -4  16  10-77.8157 203.440   4
   4  16  10-271.387 211.490   4
  -4  16  11 146.362 230.674   4
   4  16  11 416.005 239.170   4
   4  16  12-372.515 280.546   4
  -4  16  12 40.3465 238.595   4
   4  16  13-331.825 222.789   4
  -4  16  13-203.436 202.157   4
   4  16  14-169.162 210.665   4
  -4  16  14 242.198 232.801   4
   4 -18   0 46126.9 2326.93   1
  -4  18   0 49996.5 1544.71   4
   4  18   1 774.651 279.014   4
   4 -18  -1 510.981 387.397   1
   4 -18   1 92.8899 320.244   1
  -4 -18   1 154.680 333.428   1
  -4  18   1 570.071 211.848   4
   4  18   2 629.808 227.867   4
   4 -18   2 1004.56 464.386   1
  -4 -18   2 710.792 436.669   1
  -4  18   2 752.419 240.062   4
   4 -18   3 395.332 330.365   1
   4  18   3 851.836 228.268   4
  -4  18   3 763.440 198.957   4
  -4 -18   3 1340.07 417.349   1
   4 -18   4 13169.1 1296.79   1
  -4  18   4 12806.5 817.788   4
  -4 -18   4 11924.9 1229.35   1
   4  18   4 11854.6 789.038   4
   4  18   5 12762.9 822.177   4
  -4  18   5 13531.8 849.960   4
   4  18   6 15150.8 913.376   4
  -4  18   6 14185.9 868.315   4
   4  18   7 13227.2 865.549   4
  -4  18   7 13872.5 856.427   4
   4  18   8 439.651 230.516   4
  -4  18   8 200.667 171.523   4
  -4  18   9 11853.5 825.921   4
   4  18   9 11132.2 779.713   4
  -4  18  10 839.194 268.267   4
   4  18  10 976.548 305.539   4
  -4  18  11 17067.6 974.340   4
   4  18  11 17419.1 967.670   4
   4  18  12-90.0019 201.831   4
  -4  18  12 122.370 207.136   4
   4  18  13-41.1993 154.660   4
  -4  18  13 159.693 191.149   4
   4  18  14-20.7320 150.294   4
   4  20   0 30187.2 1241.71   4
  -4  20   0 29067.8 1225.09   4
   4  20  -1 747.131 270.767   4
  -4  20  -1 614.451 234.592   4
  -4  20   1 257.043 214.209   4
   4  20   1 190.921 184.272   4
   4  20   2 793.011 221.007   4
  -4  20   2 760.648 230.515   4
   4  20   3 297.746 214.604   4
  -4  20   3 216.507 166.814   4
   4  20   4 11107.9 764.536   4
  -4  20   4 11171.0 771.500   4
  -4  20   5 7643.66 633.297   4
   4  20   5 8357.31 677.438   4
  -4  20   6 9664.38 696.944   4
   4  20   6 10366.1 740.963   4
   4  20   7 1129.00 294.543   4
  -4  20   7 1339.59 285.222   4
   4  20   8 748.312 247.834   4
  -4  20   8 541.555 233.060   4
  -4  20   9 8451.04 662.658   4
   4  20   9 8710.73 650.622   4
  -4  20  10 333.472 185.897   4
   4  20  10 207.538 151.460   4
  -4  20  11 2982.60 381.601   4
   4  20  11 3102.72 392.285   4
   4  20  12 26.8781 134.074   4
  -4  20  12 206.492 162.492   4
   4  20  13 1277.48 232.797   4
  -4  22   0 4693.59 502.006   4
   4  22   0 4885.16 549.329   4
  -4  22  -1-11.2095 149.355   4
   4  22   1 193.934 217.675   4
   4  22  -1 171.047 195.667   4
  -4  22   1 119.444 159.366   4
   4  22  -2 942.662 283.296   4
   4  22   2 519.131 214.718   4
  -4  22  -2 526.101 189.201   4
  -4  22   2 533.850 202.179   4
  -4  22   3-117.661 208.411   4
  -4  22  -3 77.2236 147.330   4
   4  22   3-149.374 179.980   4
   4  22  -3 210.183 191.289   4
  -4  22  -4 95.8536 154.609   4
  -4  22   4-113.486 228.700   4
   4  22   4-40.2861 198.698   4
   4  22   5 355.074 197.706   4
  -4  22   5 254.249 157.205   4
   4  22   6 1156.73 268.359   4
  -4  22   6 1270.31 272.639   4
   4  22   7 1036.98 253.651   4
  -4  22   7 1352.48 290.228   4
   4  22   8-92.7516 145.375   4
  -4  22   8 132.227 146.925   4
  -4  22   9 140.058 124.218   4
   4  22   9-124.344 172.090   4
  -4  22  10-91.1951 131.271   4
   4  22  10-132.725 138.048   4
   4  24   0 17905.1 916.506   4
  -4  24   0 15408.8 812.028   4
   4  24   1 267.221 162.145   4
   4  24  -1 262.718 186.881   4
  -4  24   1 154.198 129.432   4
  -4  24  -1 170.604 133.442   4
   4  24  -2 2212.56 334.481   4
  -4  24  -2 1500.20 257.791   4
  -4  24   2 1963.23 313.706   4
   4  24   2 2083.12 324.691   4
  -4  24   3 120.314 124.288   4
   4  24  -3-113.010 188.795   4
   4  24   3 197.333 180.772   4
  -4  24  -3-74.5186 136.718   4
  -4  24   4 4567.43 434.599   4
   4  24  -4 5553.80 496.298   4
   4  24   4 5240.92 472.736   4
  -4  24  -4 4353.51 401.287   4
   4  24  -5 5805.95 487.401   4
  -4  24  -5 4440.83 393.567   4
   4  24   5 5253.20 463.066   4
  -4  24   5 4166.55 412.152   4
   4  24   6 3938.38 393.773   4
  -4  24   6 3120.01 350.178   4
  -4  24  -6 3045.33 309.926   4
   4  24   7 1307.47 253.838   4
   4  24  -7 1812.85 272.141   4
  -5  -1   0 60.2135 46.4154   1
  -5   1   1 30306.3 534.412   1
  -5  -1  -1 30315.3 442.204   1
  -5  -1  -2 1948.40 109.203   1
  -5   1   2 1996.76 147.936   1
  -5  -1   2 1739.52 155.319   1
  -5  -1   3 4264.01 250.711   1
  -5   1   3 4978.17 241.521   1
  -5   1   4 43091.8 727.556   1
  -5  -1   4 41988.3 802.911   1
  -5   1   5 82829.6 1064.03   1
  -5  -1   5 81501.4 1190.95   1
   5  -1   6 74391.7 1025.23   1
  -5   1   6 72907.0 1069.93   1
  -5  -1   6 73863.7 1197.57   1
   5  -1   7 5125.86 292.878   1
  -5   1   7 5350.54 318.126   1
  -5  -1   7 5180.86 343.874   1
  -5  -1   8 26318.0 803.733   1
  -5   1   8 26837.3 748.854   1
  -5   1   9 20104.2 685.946   1
  -5  -1   9 20192.4 740.517   1
  -5   1  10 98576.4 1923.54   2
  -5  -1  10 99371.2 1971.68   2
   5   1  10 96892.3 1967.32   2
  -5  -1  10 89602.8 1619.92   1
   5  -1  10 85936.3 1856.44   2
   5   1  11 402.158 169.479   2
   5  -1  11 264.041 144.464   2
  -5  -1  11 197.040 153.830   2
  -5   1  11 516.808 147.875   2
  -5  -1  12 2719.79 352.645   2
  -5   1  12 2270.93 325.243   2
   5  -1  12 2472.24 382.086   2
   5   1  12 2607.35 379.394   2
  -5   1  13 584.148 216.152   2
   5   1  13 951.606 294.079   2
  -5  -1  13 849.620 277.326   2
   5  -1  13 1232.51 320.770   2
  -5   1  14 44897.4 1581.59   2
  -5  -1  14 44703.3 1570.13   2
   5  -1  14 44698.3 1611.72   2
   5   1  14 45239.1 1646.98   2
   5  -1  15 14064.3 936.508   2
   5   1  15 15469.0 984.409   2
  -5  -1  15 15041.9 950.304   2
  -5   1  15 15323.8 991.164   2
  -5   1  16 55591.1 1803.34   2
   5  -1  16 53544.8 1787.86   2
   5   1  16 55283.8 1876.99   2
  -5  -1  16 54045.7 1740.47   2
   5  -1  17 7535.73 701.597   2
  -5  -1  17 8795.72 736.554   2
   5   1  17 8171.96 733.872   2
  -5   1  17 9480.63 764.918   2
   5  -1  18 1852.99 340.453   2
   5   1  18 2071.45 384.917   2
  -5   1  18 1810.38 396.679   2
   5   1  19 20245.3 995.999   2
   5  -1  19 16991.0 844.738   2
   5   1  20 2235.36 328.469   2
  -5  -3   0 443.675 113.621   1
  -5  -3   1 58371.8 938.312   1
  -5  -3  -1 58195.1 817.022   1
  -5  -3  -2 3186.19 173.451   1
  -5  -3   2 3311.65 261.798   1
  -5  -3   3 140725. 1638.85   1
  -5  -3  -3 134653. 817.220   1
  -5  -3   4 92273.4 1408.37   1
  -5  -3   5 2847.28 287.231   1
   5  -3   6-115.521 125.277   1
  -5  -3   6 2.78412 117.038   1
   5  -3   7 930.688 163.395   1
  -5  -3   7 774.232 173.041   1
  -5  -3   8 4524.60 397.916   1
   5  -3   8 5180.54 390.133   1
   5   3   9 965.806 197.919   2
   5  -3   9 972.186 196.300   1
  -5  -3   9 1137.98 248.646   1
  -5   3   9 786.136 163.064   2
  -5   3  10 1462.97 328.403   4
  -5   3  10 663.557 151.493   2
  -5  -3  10 884.724 232.580   2
   5   3  10 981.285 220.629   2
  -5  -3  10 1179.86 235.743   1
   5   3  10 1187.19 287.688   4
  -5   3  11-16.9371 205.511   2
   5  -3  11 254.003 134.240   2
   5   3  11-55.9362 163.633   2
  -5  -3  11 322.516 208.665   2
   5   3  12 14008.9 852.826   2
  -5   3  12 13883.4 802.783   2
   5  -3  12 12813.2 806.092   2
  -5  -3  12 14727.3 866.594   2
   5   3  13 852.038 283.215   2
  -5   3  13 520.258 205.328   2
   5  -3  13 530.431 233.133   2
  -5  -3  13 656.319 281.333   2
   5  -3  14 2559.23 371.716   2
  -5   3  14 2645.65 398.943   2
   5   3  14 3293.22 488.814   2
  -5   3  15 2033.16 408.422   2
   5   3  15 3007.85 477.791   2
   5  -3  15 2053.17 371.160   2
  -5  -3  15 3048.49 482.637   2
   5   3  16 848.398 279.376   2
   5  -3  16 1221.38 298.714   2
   5   3  17-225.915 329.396   2
  -5   3  17 1076.22 365.589   2
   5   3  18 564.113 274.733   2
  -5   3  18 1106.23 371.575   2
   5   3  19 1712.31 350.249   2
   5   3  20 719.026 247.406   2
  -5  -5   0 422.920 147.868   1
  -5  -5  -1 148197. 1592.19   1
  -5  -5   1 148115. 1732.41   1
  -5  -5   2 3906.45 321.139   1
  -5  -5  -2 4129.06 269.218   1
  -5  -5   3 103087. 1578.82   1
  -5  -5  -3 110936. 1208.60   1
  -5  -5  -4 16060.5 380.207   1
  -5  -5   4 17992.5 711.153   1
  -5  -5   5 4554.25 404.164   1
  -5  -5   6 12368.8 658.276   1
  -5  -5   7 1112.58 252.476   1
   5  -5   7 963.647 199.186   1
   5  -5   8 77323.6 1684.62   1
  -5  -5   8 80919.9 1859.69   1
   5   5   9 6969.76 560.185   4
  -5   5   9 7298.28 549.798   4
   5  -5   9 6951.64 542.856   1
  -5   5   9 6964.06 508.711   2
  -5  -5   9 7137.95 591.234   1
   5   5   9 7228.79 540.424   2
   5   5  10 88255.5 1955.80   2
  -5   5  10 84818.7 1845.48   2
  -5  -5  10 91917.1 2163.21   1
  -5   5  10 90354.5 2008.51   4
   5   5  10 87784.6 2020.85   4
   5   5  11 162.857 178.803   2
  -5   5  11 423.731 225.493   4
   5   5  11 324.723 224.903   4
  -5  -5  11 158.036 187.979   1
  -5   5  12 1342.09 270.809   2
   5   5  12 1861.88 346.667   2
   5   5  12 2053.30 401.046   4
  -5   5  13-167.019 244.282   2
   5   5  13 605.894 275.959   2
  -5   5  14 1325.46 357.614   2
   5   5  14 2943.28 515.051   2
  -5   5  15 7251.84 726.586   2
   5   5  15 8912.10 773.802   2
   5   5  16 28715.3 1369.31   2
  -5   5  16 27484.3 1302.81   2
   5   5  17 1517.84 330.704   2
  -5   5  17 1767.63 442.037   2
   5   5  18 7288.95 679.320   2
  -5   5  18 7578.32 718.568   2
   5   5  19 20471.5 1043.58   2
   5   5  20 5916.16 509.155   2
  -5  -7   0 1043.58 217.927   1
  -5  -7  -1 81092.5 1381.79   1
  -5  -7   1 78966.4 1446.34   1
  -5  -7   2 9800.10 540.266   1
  -5  -7  -2 10197.4 491.752   1
  -5  -7  -3 1164.59 183.207   1
  -5  -7   3 1257.78 250.648   1
  -5  -7  -4 683.207 144.457   1
  -5  -7   4 434.702 199.946   1
  -5  -7   5 6869.55 530.252   1
  -5  -7   6 34549.8 1187.94   1
   5  -7   7 3003.73 376.670   1
  -5  -7   7 3393.70 431.449   1
   5   7   8 20310.0 885.979   4
  -5  -7   8 22631.3 1087.07   1
  -5   7   8 20519.3 873.829   4
   5   7   8 19710.8 875.853   2
  -5   7   8 20829.8 853.328   2
   5  -7   8 20619.3 982.117   1
  -5   7   9 26933.1 1066.75   4
  -5  -7   9 26496.1 1230.46   1
   5   7   9 24303.2 1019.53   4
  -5   7   9 26153.2 1000.31   2
   5   7   9 25885.6 1058.33   2
   5  -7   9 25204.1 1152.28   1
   5  -7  10 117242. 2599.63   1
  -5   7  10 125335. 2411.10   4
  -5  -7  10 124567. 2795.35   1
   5   7  10 118794. 2364.59   4
  -5   7  10 116186. 2239.33   2
   5   7  10 121461. 2390.15   2
  -5   7  11 742.357 175.382   2
  -5   7  11 1571.65 348.476   4
   5   7  11 1194.44 269.823   2
   5   7  11 1095.49 286.900   4
  -5  -7  11 1518.91 307.647   1
   5   7  12 21141.1 1145.47   4
  -5   7  12 21379.2 1069.56   2
  -5   7  12 23031.5 1173.22   4
   5   7  13 1239.30 419.296   4
  -5   7  13 376.502 196.132   2
   5   7  13 810.090 312.805   2
  -5   7  14 20438.3 1107.56   2
   5   7  14 23645.8 1250.13   2
   5   7  15 10393.7 807.668   2
  -5   7  15 11376.3 854.189   2
   5   7  16 27233.8 1338.07   2
  -5   7  16 27804.6 1286.98   2
  -5   7  17 216.344 342.979   2
   5   7  17-247.554 283.721   2
   5   7  18 2559.89 433.580   2
  -5   7  18 3657.76 498.671   2
   5   7  19 21815.0 1030.79   2
   5   7  20 6266.53 490.995   2
  -5  -9   0 139.670 172.922   1
  -5  -9   1 5374.61 448.046   1
  -5  -9  -1 6115.89 443.412   1
  -5  -9  -2 3544.15 351.872   1
  -5  -9   2 2798.68 358.271   1
  -5  -9   3 2225.23 331.782   1
  -5  -9  -3 2561.93 292.992   1
  -5  -9  -4 6290.12 433.105   1
  -5  -9   4 5863.97 519.323   1
  -5  -9   5 3877.00 451.576   1
   5  -9   6 43563.5 1443.68   1
  -5  -9   6 40320.5 1408.08   1
   5   9   6 39097.8 1167.43   4
   5  -9   7 8850.38 704.531   1
  -5   9   7 8184.80 550.443   4
   5   9   7 8157.39 539.513   4
  -5  -9   7 8215.88 686.657   1
   5   9   7 7438.22 532.002   2
  -5   9   7 6558.12 504.408   2
   5   9   8 10187.4 658.820   2
   5  -9   8 10834.5 802.670   1
  -5   9   8 10564.0 635.115   2
   5   9   8 10432.2 657.908   4
  -5   9   8 11123.7 682.640   4
  -5  -9   8 11395.6 847.493   1
  -5  -9   9 3107.69 504.707   1
   5   9   9 2328.33 341.561   2
  -5   9   9 2578.69 332.320   2
   5  -9   9 3224.79 478.951   1
  -5   9   9 3176.35 407.700   4
   5   9   9 2497.94 362.679   4
   5   9  10 7916.58 642.152   4
   5   9  10 7541.96 635.263   2
  -5   9  10 7431.68 629.439   4
  -5   9  10 7071.11 558.753   2
  -5  -9  10 7305.24 751.311   1
   5  -9  10 7962.46 772.521   1
   5   9  11 129.324 200.388   4
  -5  -9  11-187.652 313.086   1
  -5   9  11-168.847 239.150   4
   5   9  11 60.6488 163.772   2
  -5   9  11-260.071 232.438   2
  -5   9  12-58.4178 238.738   2
   5   9  12 202.538 245.103   2
   5   9  12-292.284 238.525   4
  -5   9  12-217.242 250.853   4
   5   9  13 2306.08 489.800   4
   5   9  13 2743.91 468.568   2
  -5   9  13 2915.65 509.508   4
  -5   9  13 2434.94 396.252   2
   5   9  14 18127.5 1113.85   2
  -5   9  14 16500.5 991.286   2
   5   9  14 15301.9 1075.24   4
   5   9  15-1608.22 392.436   2
  -5   9  15 64.6059 259.453   2
   5   9  16 2531.76 394.781   2
  -5   9  16 3001.45 458.830   2
   5   9  17 1622.01 318.416   2
  -5   9  17 2191.48 419.395   2
   5   9  18 2974.85 418.624   2
   5   9  19 4389.32 436.091   2
  -5 -11   0 247.429 180.949   1
  -5 -11  -1 100557. 2053.74   1
  -5 -11   1 103185. 2096.86   1
  -5 -11   2 423.775 181.961   1
  -5 -11  -2 745.245 237.283   1
  -5 -11   3 11117.1 756.277   1
   5  11   3 9011.74 524.163   4
  -5 -11  -3 10787.6 681.044   1
  -5 -11  -4 23324.9 964.966   1
  -5 -11   4 22406.9 1089.68   1
  -5  11   4 20294.1 848.364   4
   5  11   4 19840.4 816.215   4
  -5  11   5 96298.7 1895.18   4
  -5 -11   5 97004.0 2285.10   1
   5  11   5 92432.1 1850.41   4
   5  11   6 49354.2 1404.98   4
  -5  11   6 52797.9 1461.68   4
  -5 -11   6 50823.9 1747.45   1
  -5  11   7 25419.0 1020.01   4
   5  11   7 22779.4 984.324   4
   5 -11   7 26254.0 1322.59   1
  -5 -11   7 25648.4 1312.51   1
  -5  11   7 21198.7 927.803   2
   5  11   7 21526.3 922.381   2
  -5  11   8 419.484 198.187   4
   5  11   8 255.010 133.622   2
  -5  11   8-143.834 193.613   2
   5 -11   8 323.691 202.058   1
   5  11   8 172.512 170.729   4
  -5 -11   8-31.4016 262.106   1
  -5  11   9 4755.83 523.200   4
   5 -11   9 4615.67 662.639   1
   5  11   9 4474.27 488.176   2
   5  11   9 4278.99 481.615   4
  -5 -11   9 4263.55 628.891   1
  -5  11   9 3963.11 420.562   2
   5  11  10 40211.2 1456.89   2
   5 -11  10 38376.2 1830.39   1
  -5  11  10 40191.9 1480.80   4
  -5  11  10 39418.3 1381.22   2
   5  11  10 38662.3 1464.64   4
  -5 -11  10 38370.8 1834.45   1
  -5 -11  11 284.581 273.989   1
  -5  11  11 81.4727 198.990   2
  -5  11  11 216.168 231.708   4
   5  11  11 308.167 175.536   2
   5 -11  11 443.207 292.657   1
   5  11  11 772.574 340.410   4
  -5  11  12 14756.4 905.627   2
  -5  11  12 15894.4 1026.08   4
   5  11  12 15710.0 990.118   2
   5  11  12 12760.9 907.786   4
   5  11  13 152.038 236.117   4
  -5  11  13 213.126 293.486   4
   5  11  13 25.2530 270.493   2
  -5  11  13 510.600 246.137   2
   5  11  14 21735.6 1228.44   4
   5  11  14 25006.7 1240.59   2
  -5  11  14 22851.5 1163.32   2
  -5  11  15 7552.76 698.991   2
   5  11  15 7788.68 697.934   2
   5  11  16 19151.8 1069.62   2
  -5  11  16 19452.2 1019.19   2
   5  11  17 6407.44 606.646   2
  -5  11  17 7606.51 630.593   2
   5  11  18 215.402 150.979   2
  -5 -13   0 121.782 192.296   1
  -5 -13   1 39220.9 1525.46   1
  -5 -13  -1 41629.2 1530.89   1
  -5  13   2 175.937 167.098   4
  -5 -13   2 487.327 265.767   1
  -5 -13  -2 664.329 237.009   1
  -5 -13  -3 21757.3 1105.54   1
  -5 -13   3 18622.0 1104.33   1
  -5  13   3 19006.1 838.416   4
   5  13   3 19047.7 824.942   4
  -5 -13   4 17868.1 1092.77   1
   5 -13   4 19890.9 1195.15   1
  -5  13   4 18629.8 875.551   4
   5  13   4 18159.9 839.674   4
   5  13   5 31758.9 1170.00   4
  -5 -13   5 32204.1 1488.70   1
  -5  13   5 34222.3 1209.17   4
   5 -13   6 31738.4 1595.62   1
  -5  13   6 31198.1 1182.61   4
   5  13   6 29663.1 1156.38   4
  -5 -13   6 28161.9 1458.77   1
  -5 -13   7 2183.15 471.379   1
   5 -13   7 2120.18 455.688   1
   5  13   7 1537.78 284.765   4
  -5  13   7 2031.94 346.991   4
  -5  13   8 227.712 164.825   4
  -5 -13   8 530.789 278.321   1
   5  13   8 328.321 147.661   2
   5  13   8-222.310 278.941   4
   5 -13   8 86.4271 292.788   1
  -5 -13   9 4682.23 702.018   1
   5  13   9 5019.62 507.921   2
   5 -13   9 5195.67 769.897   1
  -5  13   9 5761.83 585.985   4
   5  13   9 4948.56 535.770   4
   5  13  10 56461.2 1730.02   2
  -5  13  10 55049.7 1613.14   2
   5  13  10 52709.0 1741.98   4
   5 -13  10 49814.0 2285.54   1
  -5  13  10 58604.0 1836.21   4
  -5 -13  10 52208.9 2335.91   1
  -5  13  11 389.935 215.392   4
   5  13  11 642.912 340.609   4
  -5  13  11 406.157 231.894   2
  -5 -13  11 89.4437 242.132   1
   5  13  11 660.281 263.800   2
   5 -13  11 582.531 390.273   1
  -5  13  12 6867.30 688.415   4
   5  13  12 6875.88 617.447   2
   5  13  12 6447.39 657.499   4
  -5  13  12 6283.51 585.429   2
  -5  13  13 549.291 371.046   4
  -5  13  13 503.438 263.517   2
   5  13  13 283.988 250.603   4
   5  13  13 51.7492 247.694   2
   5  13  14 23027.9 1174.48   2
  -5  13  14 21793.3 1210.45   4
   5  13  14 20561.4 1154.16   4
  -5  13  14 22547.3 1068.86   2
   5  13  15 4902.65 530.948   2
  -5  13  15 5001.10 533.742   2
   5  13  16 19780.5 991.570   2
   5  13  17 1332.21 268.028   2
  -5 -15   0 712.730 355.907   1
  -5 -15  -1 812.061 350.892   1
  -5 -15   1 784.547 380.068   1
   5 -15   1-202.692 372.910   1
   5 -15   2 1068.79 293.022   1
   5  15   2 1063.14 202.938   4
  -5  15   2 1069.28 225.052   4
  -5 -15   2 1419.10 435.810   1
  -5 -15  -2 1786.03 436.664   1
  -5 -15   3 15812.7 1142.71   1
  -5  15   3 15986.7 832.262   4
   5  15   3 15547.2 811.360   4
   5 -15   3 16899.4 1228.93   1
   5 -15   4 2117.14 504.568   1
   5  15   4 2248.22 328.813   4
  -5  15   4 2304.31 337.994   4
  -5 -15   4 1778.35 429.642   1
   5 -15   5 3820.31 621.297   1
  -5  15   5 3106.29 429.596   4
   5  15   5 3311.93 402.992   4
  -5 -15   5 3016.46 568.047   1
  -5 -15   6 121.501 308.072   1
   5  15   6 304.383 168.545   4
   5 -15   6 612.971 281.283   1
  -5  15   6-44.2959 255.351   4
  -5 -15   7 308.338 287.077   1
  -5  15   7-55.0247 224.395   4
   5 -15   7 429.461 357.385   1
   5  15   7-129.562 298.298   4
  -5 -15   8 4986.68 783.126   1
  -5  15   8 4027.27 483.072   4
   5  15   8 3219.59 427.488   4
   5 -15   8 4897.21 818.385   1
  -5 -15   9 15.9895 312.717   1
  -5  15   9-143.291 226.448   4
   5 -15   9-230.017 313.784   1
   5  15   9 29.1435 235.789   4
  -5  15  10 1140.56 320.714   4
   5  15  10 819.778 287.234   4
   5  15  11-44.6292 204.264   4
  -5  15  11-96.4742 245.561   4
   5  15  12 10934.7 767.171   2
   5  15  12 10344.3 809.905   4
  -5  15  12 11729.8 870.602   4
   5  15  13 586.878 220.484   2
   5  15  13 656.896 244.291   4
  -5  15  13 833.810 285.545   4
  -5  15  14 6999.94 654.795   4
   5  15  14 6122.24 568.532   2
   5  15  14 5132.99 554.750   4
   5  15  15 2752.59 384.988   2
   5  15  16 1008.17 234.758   2
   5 -17   0 366.225 294.571   1
  -5 -17   0 415.453 298.647   1
   5 -17  -1 31340.8 1797.90   1
   5 -17   1 31053.8 1841.28   1
  -5  17   1 30614.7 1166.52   4
  -5 -17   1 28980.4 1666.94   1
  -5 -17  -1 26493.9 1569.95   1
   5 -17  -2 244.732 263.924   1
   5 -17   2 653.878 329.415   1
  -5 -17   2 357.675 315.094   1
  -5  17   2 245.702 189.671   4
   5  17   2 559.028 237.087   4
   5 -17   3-97.3953 354.096   1
  -5  17   3-166.113 159.584   4
  -5 -17   3 117.988 238.348   1
   5  17   3-125.046 193.124   4
  -5  17   4 1343.42 278.275   4
   5  17   4 1569.65 316.751   4
   5 -17   4 2618.16 656.774   1
  -5 -17   4 1362.68 478.029   1
   5  17   5 6609.84 584.227   4
   5 -17   5 6052.40 853.700   1
  -5 -17   5 6326.57 872.542   1
  -5  17   5 6689.51 596.906   4
  -5  17   6 4868.23 519.436   4
   5  17   6 4069.00 465.510   4
  -5 -17   6 3895.28 720.991   1
   5 -17   6 4602.40 772.252   1
   5  17   7 1199.91 291.264   4
  -5  17   7 996.816 285.464   4
  -5  17   8-21.3556 186.888   4
   5  17   8-34.0881 203.121   4
   5  17   9 161.124 184.603   4
  -5  17   9 125.055 184.989   4
   5  17  10 20832.8 1109.82   4
  -5  17  10 21240.3 1110.05   4
   5  17  11 59.3048 207.731   4
  -5  17  11 127.721 203.359   4
   5  17  12 4863.36 525.557   4
  -5  17  12 4833.49 535.291   4
   5  17  13-1.94417 230.932   4
  -5  17  13 145.005 174.424   4
   5  17  14-37.3511 185.032   4
  -5  19   0 569.213 249.027   4
   5  19   0 719.912 357.449   4
  -5  19  -1 52775.6 1617.34   4
   5  19   1 50106.4 1582.15   4
  -5  19   1 51783.4 1616.99   4
  -5  19   2 783.917 250.765   4
   5  19   2 828.639 284.432   4
  -5  19   3 822.207 230.968   4
   5  19   3 704.773 195.905   4
   5  19   4 3203.89 406.329   4
  -5  19   4 3426.84 437.205   4
  -5  19   5 17342.3 966.399   4
   5  19   5 17479.4 966.030   4
   5  19   6 10213.8 770.769   4
  -5  19   6 9744.28 723.441   4
   5  19   7 2016.21 362.502   4
  -5  19   7 2115.94 359.422   4
  -5  19   8 1439.22 311.037   4
   5  19   8 1621.81 323.643   4
  -5  19   9 3571.99 473.893   4
   5  19   9 3640.43 480.639   4
   5  19  10 31358.5 1259.26   4
  -5  19  10 31165.2 1265.29   4
  -5  19  11 546.466 222.850   4
   5  19  11 42.8176 179.632   4
   5  19  12 6724.98 562.120   4
  -5  19  12 7061.65 585.412   4
   5  19  13 35.4608 130.723   4
  -5  19  13 478.126 217.755   4
   5  19  14 5062.30 438.447   4
  -5  21   0 83.7186 156.350   4
   5  21   0 245.443 220.621   4
  -5  21   1 4459.10 502.277   4
   5  21  -1 5697.93 565.785   4
   5  21   1 4837.07 521.695   4
  -5  21  -1 4470.11 492.234   4
   5  21   2 77.9787 176.032   4
  -5  21  -2 145.492 206.070   4
  -5  21   2-50.6008 201.957   4
   5  21  -2 24.1639 192.092   4
  -5  21  -3 173.557 200.031   4
  -5  21   3 95.9514 154.370   4
   5  21   3-308.427 201.326   4
  -5  21   4-16.1444 235.320   4
   5  21   4-45.4573 177.977   4
   5  21   5 209.162 171.442   4
  -5  21   5 398.671 169.732   4
   5  21   6 329.397 189.372   4
  -5  21   6 304.439 169.999   4
  -5  21   7 625.413 192.715   4
   5  21   7 187.699 168.235   4
  -5  21   8 5179.59 516.166   4
   5  21   8 5266.45 511.773   4
   5  21   9 719.733 216.668   4
  -5  21   9 637.976 212.501   4
  -5  21  10 2610.14 350.239   4
   5  21  10 1837.41 279.440   4
   5  21  11-140.571 144.668   4
  -5  21  11 145.798 130.708   4
   5  21  12-343.181 159.933   4
   5  23   0-192.875 160.325   4
  -5  23   0-240.220 183.458   4
   5  23  -1 5810.59 548.860   4
  -5  23  -1 5946.79 527.584   4
   5  23   1 5953.36 549.185   4
  -5  23   1 4598.26 483.243   4
   5  23  -2 130.807 168.184   4
   5  23   2 33.0726 155.058   4
  -5  23  -2-65.2542 148.292   4
  -5  23   2-175.976 172.788   4
  -5  23  -3 1174.17 235.589   4
  -5  23   3 1149.95 246.248   4
   5  23   3 1032.50 255.444   4
   5  23  -3 1408.62 295.377   4
   5  23   4 2521.04 377.590   4
  -5  23   4 2176.06 328.948   4
   5  23  -4 2845.43 401.298   4
  -5  23  -4 2207.74 313.047   4
   5  23   5 7692.83 593.813   4
  -5  23   5 6706.99 555.697   4
  -5  23  -5 7265.11 524.613   4
  -5  23  -6 6678.70 477.293   4
   5  23   6 6774.52 558.337   4
  -5  23   6 6427.28 525.376   4
  -5  23  -7 1589.46 235.938   4
  -5  23   7 1211.70 235.726   4
   5  23   7 1360.55 255.132   4
   5  23   8 43.6784 153.032   4
  -5  23  -8 107.536 90.2458   4
  -5  23   8 104.124 127.743   4
   5  23   9-390.687 187.649   4
  -5  25   0-323.724 161.353   4
   5  25   0 33.6817 155.616   4
   5  25   1 6368.64 513.226   4
   5  25  -1 7194.92 547.077   4
  -5  25   1 4243.69 370.047   4
  -5  25  -1 4566.60 389.630   4
   5  25   2 8.17883 125.317   4
   5  25  -2 56.1136 155.148   4
   5  25  -3 2216.83 301.589   4
   5  25   3 1863.65 283.884   4
   5  25   4 2293.89 314.510   4
   5  25  -4 2366.43 311.424   4
   5  25   5 10212.3 598.474   4
  -6   0   0 61694.9 745.951   1
  -6   0   1 232.713 71.3865   1
  -6   0  -1 239.786 61.2935   1
  -6   0   2 95540.0 1027.37   1
  -6   0   3 653.591 108.867   1
  -6   0   4 246151. 1842.42   1
  -6   0   5 209964. 1811.39   1
   6   0   6 75276.1 840.764   1
  -6   0   6 77833.1 1168.88   1
  -6   0   7 80300.0 1263.10   1
   6   0   7 66763.2 794.415   1
  -6   0   8 2216.19 221.032   1
  -6   0   9 138529. 1896.84   1
  -6   0  10 11359.4 673.717   2
   6   0  10 10259.1 661.948   2
  -6   0  11 32171.3 1190.40   2
   6   0  11 30561.9 1177.13   2
  -6   0  12 1271.54 287.637   2
   6   0  12 1387.14 310.776   2
  -6   0  13 36317.1 1379.12   2
   6   0  13 36181.5 1414.89   2
  -6   0  14 11141.1 810.573   2
   6   0  14 12143.7 866.830   2
   6   0  15 122935. 2741.23   2
  -6   0  15 120211. 2596.64   2
   6   0  16 48542.2 1731.51   2
  -6   0  16 48198.7 1644.70   2
   6   0  17 40916.3 1602.45   2
  -6   0  17 40819.4 1497.97   2
   6   0  18 11607.7 820.188   2
   6   0  19 5494.71 520.684   2
   6   0  20 6403.40 502.085   2
  -6  -2   0 18604.6 463.609   1
  -6  -2  -1 233.066 76.3868   1
  -6  -2   1 133.322 75.1992   1
  -6   2   2 20045.2 537.705   1
  -6  -2   2 19244.6 542.636   1
  -6  -2  -2 20114.3 375.253   1
  -6  -2  -3 14457.2 291.810   1
  -6  -2   3 15887.0 527.311   1
  -6   2   4 25078.7 621.545   1
  -6  -2   4 24277.4 678.898   1
  -6   2   5 4496.73 275.822   1
  -6  -2   5 4131.30 306.516   1
  -6   2   6 56846.9 1017.59   1
  -6  -2   6 56804.2 1171.04   1
  -6   2   7 10373.1 463.886   1
   6  -2   7 10909.3 480.523   1
  -6  -2   7 10509.9 539.315   1
   6  -2   8 938.000 173.081   1
  -6  -2   8 899.426 198.917   1
  -6   2   8 915.871 155.408   1
  -6  -2   9 24614.2 903.307   1
  -6   2   9 21325.4 752.446   1
   6   2  10 1758.43 348.012   4
   6  -2  10 994.700 219.032   2
   6   2  10 976.925 216.131   2
  -6  -2  10 1271.70 262.086   2
  -6   2  10 1193.80 220.970   2
  -6  -2  10 1326.15 225.664   1
   6  -2  11 900.185 249.897   2
   6   2  11 1090.18 239.105   2
  -6  -2  11 1109.92 257.171   2
  -6   2  11 784.544 206.313   2
  -6  -2  12 539.245 221.458   2
   6  -2  12 711.310 262.015   2
   6   2  12 334.054 177.866   2
  -6   2  12 363.706 202.166   2
  -6   2  13 15483.6 905.254   2
   6  -2  13 16337.9 964.533   2
   6   2  13 15984.3 976.876   2
  -6  -2  13 16352.6 937.446   2
  -6   2  14 1780.21 368.784   2
  -6  -2  14 2321.57 412.489   2
   6  -2  14 2334.10 386.692   2
   6   2  14 2055.95 403.658   2
  -6  -2  15 61698.9 1848.41   2
   6   2  15 65468.7 2050.63   2
   6  -2  15 61173.4 1888.52   2
  -6   2  15 60482.8 1880.63   2
   6  -2  16 19852.7 1078.28   2
  -6  -2  16 21088.8 1086.39   2
  -6   2  16 21706.1 1153.22   2
   6   2  16 22113.0 1199.12   2
   6   2  17 267.391 223.532   2
   6  -2  17 469.150 223.738   2
   6   2  18 1164.67 284.985   2
   6  -2  18 989.910 285.286   2
   6   2  19 1118.06 280.850   2
   6   2  20 3154.42 365.619   2
  -6  -4   0 218686. 1951.59   1
  -6  -4  -1 3051.01 239.878   1
  -6  -4   1 3116.01 274.477   1
  -6  -4  -2 56611.0 868.459   1
  -6  -4   2 55293.8 1079.00   1
  -6  -4  -3 50173.1 704.017   1
  -6  -4   3 52791.7 1115.08   1
  -6  -4  -4 34796.3 371.712   1
  -6  -4   4 54855.6 1192.43   1
  -6  -4   5 776.590 216.393   1
  -6  -4   6 3665.39 353.431   1
  -6  -4   7 1386.72 239.681   1
   6  -4   7 1582.30 221.933   1
   6  -4   8 502.834 169.994   1
  -6  -4   8 22.1484 166.047   1
  -6   4   9 71070.6 1602.90   2
   6   4   9 72375.5 1684.91   2
   6  -4   9 69005.8 1555.67   1
  -6  -4   9 73590.3 1768.82   1
  -6   4   9 70909.0 1699.74   4
   6   4   9 68250.9 1708.82   4
  -6  -4  10 16939.5 882.731   1
  -6   4  10 15453.2 791.946   2
  -6   4  10 18100.9 901.971   4
   6   4  10 16185.3 848.657   2
   6   4  10 15690.4 879.811   4
  -6  -4  10 14396.6 797.015   2
  -6   4  11 69461.8 1733.51   2
   6   4  11 71043.5 1946.36   4
  -6  -4  11 71953.8 1860.93   1
   6   4  11 71575.5 1860.31   2
  -6  -4  11 70893.5 1815.82   2
  -6   4  12 293.169 177.910   2
   6   4  12 375.049 184.489   2
  -6  -4  12 1024.81 323.935   2
   6   4  12 908.425 364.837   4
   6   4  13 10295.5 806.007   2
  -6   4  13 9691.45 712.844   2
  -6  -4  13 11723.7 809.298   2
   6   4  14 2453.19 470.824   2
  -6  -4  14 2614.01 460.058   2
  -6   4  14 1754.25 343.755   2
   6   4  15 609.851 349.475   2
  -6   4  15-162.613 216.452   2
   6   4  16 4818.81 557.866   2
  -6   4  16 6827.21 649.622   2
  -6   4  17 814.452 360.078   2
   6   4  17-581.172 358.424   2
   6   4  18 4952.16 543.401   2
  -6   4  18 5839.89 596.645   2
   6   4  19 7950.75 655.994   2
   6   4  20 13850.5 737.830   2
  -6  -6   0 363368. 2883.07   1
  -6  -6  -1 2648.20 268.266   1
  -6  -6   1 2171.04 278.847   1
  -6  -6   2 1530.74 256.924   1
  -6  -6  -2 2081.22 232.966   1
  -6  -6   3 252.715 186.899   1
  -6  -6  -3 403.355 130.054   1
  -6  -6   4 4857.80 410.763   1
  -6  -6  -4 5052.01 267.473   1
  -6  -6   5 8176.69 562.499   1
  -6  -6   6 12012.5 696.678   1
   6  -6   7 1448.80 240.603   1
  -6  -6   7 1273.45 272.134   1
  -6  -6   8 39177.1 1366.74   1
   6   6   8 35025.9 1163.76   2
  -6   6   8 36307.6 1136.20   2
   6   6   8 37109.1 1180.27   4
   6  -6   8 36096.0 1228.94   1
  -6   6   9 181042. 2730.10   4
  -6   6   9 181931. 2644.38   2
   6   6   9 179473. 2744.82   2
  -6  -6   9 183700. 3118.41   1
   6   6   9 176605. 2737.31   4
   6  -6   9 179545. 2873.51   1
   6   6  10 2072.85 359.888   2
  -6   6  10 1935.92 353.794   4
   6   6  10 1711.17 334.794   4
  -6   6  10 1383.93 265.314   2
   6  -6  10 1813.59 349.901   1
  -6  -6  10 1409.40 306.616   1
   6   6  11 81559.7 2025.05   2
  -6   6  11 76359.8 1989.31   4
  -6   6  11 75664.5 1864.97   2
   6   6  11 78617.9 2043.85   4
  -6  -6  11 76714.7 2162.95   1
   6   6  12 374.721 300.691   4
  -6   6  12 569.614 304.668   4
  -6   6  12 211.299 199.208   2
   6   6  12 96.6942 172.195   2
   6   6  13 4364.43 551.540   2
   6   6  13 5893.56 692.064   4
  -6   6  13 4653.49 507.979   2
  -6   6  14 3336.63 471.101   2
   6   6  14 3621.92 528.063   2
   6   6  15 75240.9 2232.37   2
  -6   6  15 67500.5 2021.26   2
   6   6  16 3387.56 446.602   2
  -6   6  16 3471.94 509.570   2
  -6   6  17 537.779 391.811   2
   6   6  17-530.979 372.111   2
   6   6  18 16459.8 991.432   2
  -6   6  18 17295.8 952.402   2
   6   6  19 12740.6 811.936   2
   6   6  20 41802.5 1246.21   2
  -6  -8   0 182563. 2322.51   1
  -6  -8  -1 611.180 197.362   1
  -6  -8   1 656.732 216.866   1
  -6  -8   2 12679.6 674.458   1
  -6  -8  -2 12235.7 588.217   1
  -6  -8   3 292.005 198.636   1
  -6  -8  -3 391.859 152.957   1
  -6  -8   4 553.892 225.095   1
  -6  -8  -4 959.674 183.754   1
  -6  -8   5 5390.60 493.220   1
  -6  -8   6 3024.63 401.829   1
   6  -8   7 23181.0 1056.99   1
  -6  -8   7 23613.0 1107.76   1
   6   8   7 22856.6 902.708   4
   6   8   8 7942.92 573.464   4
  -6   8   8 8385.72 580.272   4
   6   8   8 7700.03 561.149   2
  -6  -8   8 7866.34 690.446   1
   6  -8   8 8355.67 675.092   1
  -6   8   8 7655.27 543.735   2
   6   8   9 102612. 2122.65   4
   6  -8   9 102658. 2474.06   1
  -6  -8   9 106778. 2586.91   1
   6   8   9 105691. 2187.53   2
  -6   8   9 107687. 2155.73   4
  -6   8   9 107031. 2117.75   2
  -6  -8  10 4245.38 562.625   1
  -6   8  10 4321.57 435.377   2
  -6   8  10 4065.19 462.629   4
   6   8  10 4309.51 488.094   2
   6  -8  10 4346.95 561.537   1
   6   8  10 4318.51 505.658   4
  -6   8  11 42727.4 1450.26   2
   6   8  11 46925.9 1622.22   2
  -6  -8  11 42812.9 1777.74   1
   6   8  11 44971.0 1572.08   4
  -6   8  11 45155.5 1563.58   4
   6   8  12 1257.56 324.792   4
  -6  -8  12 612.135 285.546   1
  -6   8  12 965.305 323.606   4
  -6   8  12 555.580 220.558   2
   6   8  13 456.073 323.449   4
  -6   8  13 117.850 203.952   2
   6   8  13 139.157 236.124   2
  -6   8  13 808.040 349.418   4
   6   8  14 4126.53 661.517   4
  -6   8  14 3432.16 515.930   2
   6   8  14 3801.12 557.535   2
   6   8  15 4537.68 560.268   2
  -6   8  15 4525.11 567.096   2
  -6   8  16 1023.11 400.266   2
   6   8  16 70.3886 297.473   2
  -6   8  17 1938.96 442.569   2
   6   8  17 471.215 242.374   2
   6   8  18 8644.28 688.086   2
   6   8  19 8658.33 630.268   2
  -6 -10   0 2105.37 304.553   1
  -6 -10  -1 338.450 177.903   1
  -6 -10   1 715.460 234.610   1
  -6 -10   2 527.614 211.173   1
  -6 -10  -2 621.284 200.179   1
  -6 -10  -3 4504.14 420.361   1
  -6 -10   3 4328.10 460.326   1
  -6 -10   4 13173.1 787.151   1
  -6 -10  -4 12794.8 672.340   1
   6  10   5 20939.7 868.598   4
  -6 -10   5 21196.4 1044.90   1
   6  10   6 80966.3 1738.48   4
   6 -10   6 85403.0 2175.07   1
  -6 -10   6 80523.0 2105.95   1
  -6  10   7 74935.0 1739.74   2
  -6  10   7 89314.2 1869.05   4
  -6 -10   7 88217.4 2324.60   1
   6  10   7 78326.5 1769.47   2
   6 -10   7 94604.7 2412.24   1
   6  10   7 87224.3 1859.31   4
  -6  10   8 5283.27 494.457   4
   6  10   8 4542.48 447.372   4
   6  10   8 4712.30 462.940   2
  -6 -10   8 4309.60 554.234   1
  -6  10   8 3656.90 403.262   2
   6 -10   8 5064.99 608.095   1
  -6 -10   9-229.850 234.262   1
   6 -10   9 648.196 302.934   1
   6  10   9 76.9713 139.175   2
   6  10   9-112.565 237.589   4
  -6  10   9-234.334 215.301   2
  -6  10   9 455.299 243.965   4
  -6  10  10 527.544 256.050   4
  -6 -10  10 265.148 204.695   1
  -6  10  10 373.498 176.638   2
   6 -10  10 868.477 350.765   1
   6  10  10 688.722 283.919   4
   6  10  10 217.203 163.464   2
  -6 -10  11 258.732 218.516   1
  -6  10  11 389.132 178.478   2
   6  10  11 1093.43 357.789   4
  -6  10  11 383.527 219.309   4
   6  10  11 981.204 294.306   2
   6  10  12 766.103 264.494   4
  -6  10  12 730.667 314.999   4
   6  10  12 1657.05 391.467   2
  -6 -10  12 934.097 368.296   1
  -6  10  12 797.188 252.784   2
   6  10  13 3586.50 532.587   2
   6  10  13 3634.78 519.543   4
  -6  10  13 3617.99 503.124   2
  -6  10  13 3777.40 561.623   4
   6  10  14 2735.61 442.502   2
  -6  10  14 2087.11 440.737   2
   6  10  14 3116.28 532.491   4
   6  10  15 23812.7 1264.18   2
  -6  10  15 24045.5 1187.57   2
   6  10  16 11470.9 882.774   2
  -6  10  16 11612.4 812.389   2
   6  10  17 5786.07 598.426   2
  -6  10  17 7490.90 633.807   2
   6  10  18 3377.81 427.923   2
   6  10  19 488.656 201.543   2
  -6 -12   0 123052. 2491.06   1
  -6 -12  -1 2784.20 425.868   1
  -6 -12   1 2432.99 381.618   1
  -6 -12   2 707.363 268.510   1
  -6 -12  -2 790.485 300.937   1
  -6  12   2 451.504 116.671   4
  -6 -12   3 2656.37 413.906   1
  -6  12   3 2167.70 282.850   4
  -6 -12  -3 2889.02 407.637   1
   6  12   3 2042.54 250.394   4
  -6 -12   4 108720. 2509.71   1
   6  12   4 105039. 1975.66   4
   6 -12   5 86746.7 2399.75   1
  -6  12   5 83207.6 1821.85   4
  -6 -12   5 81124.3 2236.79   1
   6  12   6 44303.6 1366.64   4
  -6 -12   6 47774.5 1800.47   1
  -6  12   6 47371.0 1441.88   4
   6 -12   7 25124.2 1399.07   1
   6  12   7 23521.5 1029.61   4
  -6  12   7 25354.6 1062.30   4
  -6 -12   7 23503.1 1331.43   1
   6  12   8 364.665 173.156   4
  -6  12   8 617.442 199.464   2
   6 -12   8 729.884 344.549   1
  -6  12   8 1007.55 294.608   4
   6  12   8 452.171 174.216   2
  -6 -12   8 824.904 362.110   1
  -6  12   9 16095.2 879.700   2
   6 -12   9 15907.2 1202.11   1
   6  12   9 18002.6 942.963   2
   6  12   9 15000.8 911.644   4
  -6  12   9 17221.5 955.104   4
  -6 -12   9 16577.1 1216.76   1
   6  12  10 3772.25 521.171   4
  -6 -12  10 3383.83 577.459   1
   6  12  10 3465.12 448.876   2
  -6  12  10 4602.46 551.938   4
   6 -12  10 3352.47 609.898   1
  -6  12  10 3910.92 447.836   2
   6  12  11 38480.8 1498.67   2
   6  12  11 36294.6 1480.48   4
  -6  12  11 39172.3 1552.14   4
  -6 -12  11 30371.2 1752.24   1
   6 -12  11 27754.1 1712.11   1
  -6  12  11 34992.2 1335.94   2
  -6  12  12-234.751 220.562   4
  -6  12  12 507.748 265.137   2
   6  12  12-87.3319 239.228   4
   6  12  12 95.4004 203.834   2
   6  12  13 19897.1 1176.93   4
   6  12  13 21526.4 1152.60   2
  -6  12  13 22127.0 1214.55   4
  -6  12  13 20411.8 1051.82   2
   6  12  14 4797.90 670.694   4
   6  12  14 4978.14 550.013   2
  -6  12  14 5882.07 618.924   2
   6  12  15 49364.8 1718.43   2
  -6  12  15 45030.7 1504.22   2
   6  12  16 13108.4 849.112   2
   6  12  17 8074.52 638.481   2
   6  12  18 224.476 156.651   2
  -6 -14   0 12613.4 940.064   1
  -6 -14   1 167.787 223.437   1
  -6 -14  -1 176.470 179.661   1
  -6 -14   2 2625.50 480.778   1
  -6 -14  -2 2539.13 439.735   1
  -6  14   2 2154.99 286.232   4
  -6 -14   3 8458.73 787.053   1
   6  14   3 8684.27 588.514   4
  -6  14   3 8829.84 610.509   4
   6 -14   4 41961.0 1842.31   1
  -6  14   4 43027.2 1343.80   4
   6  14   4 40436.6 1313.37   4
  -6 -14   4 38781.9 1710.05   1
   6 -14   5 14422.7 1117.96   1
   6  14   5 14726.3 835.222   4
  -6  14   5 15228.0 830.903   4
  -6 -14   5 14999.5 1113.46   1
  -6  14   6 12639.4 792.153   4
   6 -14   6 14568.9 1143.60   1
  -6 -14   6 12022.3 1028.77   1
   6  14   6 13445.1 808.736   4
   6 -14   7 5224.83 714.334   1
  -6  14   7 5324.90 537.122   4
   6  14   7 4287.82 470.278   4
  -6 -14   7 4936.98 656.817   1
   6  14   8 122.717 215.534   4
   6 -14   8 356.814 323.512   1
  -6 -14   8 539.606 354.575   1
  -6  14   8 624.911 252.909   4
  -6 -14   9 1019.46 328.482   1
   6 -14   9 2186.13 528.490   1
   6  14   9 1281.09 288.634   4
  -6  14   9 1604.70 350.826   4
  -6 -14  10 697.228 341.602   1
   6  14  10 923.671 327.316   4
   6 -14  10 675.432 385.273   1
  -6  14  10 862.595 303.897   4
   6  14  10 997.446 290.638   2
   6  14  11 5343.44 599.799   4
  -6  14  11 6253.75 649.430   4
   6  14  11 6388.11 600.480   2
  -6  14  11 5844.00 545.059   2
   6  14  12-245.158 310.362   4
  -6  14  12 21.1969 203.721   4
  -6  14  12 508.034 242.342   2
   6  14  12-452.607 260.978   2
   6  14  13 10185.2 767.625   2
  -6  14  13 10517.2 844.300   4
   6  14  13 8286.33 729.907   4
  -6  14  13 9394.29 683.451   2
   6  14  14 1807.28 352.292   2
   6  14  14 1544.33 337.746   4
   6  14  15 25544.9 1138.23   2
   6  14  16 6035.90 530.787   2
   6  14  17 1629.98 262.749   2
  -6 -16   0 23174.0 1406.48   1
   6 -16   0 25041.4 1533.78   1
  -6 -16   1 1114.96 332.104   1
   6 -16   1 427.419 294.901   1
   6 -16  -1 109.754 304.930   1
  -6  16   1 830.864 217.362   4
  -6 -16  -1 748.591 369.854   1
  -6 -16   2 15294.5 1167.88   1
   6 -16  -2 16746.7 1215.84   1
  -6  16   2 15932.4 843.849   4
   6  16   2 16408.3 844.695   4
   6 -16   2 16382.5 1270.36   1
   6 -16  -3 301.644 257.358   1
   6 -16   3 965.143 355.438   1
  -6 -16   3 726.500 343.792   1
  -6  16   3 844.563 223.483   4
   6  16   3 877.935 234.272   4
   6  16   4 3417.30 410.146   4
  -6  16   4 3719.67 435.183   4
  -6 -16   4 3493.59 618.322   1
   6 -16   4 3581.93 641.129   1
   6  16   5-52.5971 213.327   4
  -6  16   5 115.833 171.725   4
  -6 -16   5 425.211 347.630   1
   6 -16   5 449.489 316.768   1
   6 -16   6 352.896 306.617   1
  -6  16   6 416.202 169.002   4
   6  16   6 4.29022 203.411   4
  -6 -16   6 441.773 325.300   1
  -6  16   7 198.618 194.204   4
   6  16   7-312.168 327.493   4
   6 -16   7 535.805 333.322   1
  -6 -16   7 78.0519 227.758   1
   6  16   8-79.8658 210.976   4
  -6  16   8 336.496 225.751   4
   6  16   9 307.999 196.325   4
  -6  16   9 408.078 257.882   4
   6  16  10 580.207 264.855   4
  -6  16  10 611.423 263.925   4
  -6  16  11 39227.3 1532.91   4
   6  16  11 37028.8 1472.06   4
   6  16  12-7.61919 237.728   4
  -6  16  12 60.4330 179.494   4
   6  16  13 7378.78 637.328   4
  -6  16  13 8191.82 691.269   4
   6  16  14-249.222 224.364   4
   6 -18   0 101995. 3482.63   1
  -6  18   0 107624. 2241.16   4
   6 -18   1 2785.87 651.803   1
   6  18   1 3867.30 483.626   4
  -6  18   1 2728.25 408.593   4
   6 -18  -1 2140.75 544.914   1
  -6 -18   1 2109.86 529.123   1
   6 -18  -2 15245.8 1311.09   1
   6 -18   2 18199.3 1506.17   1
  -6  18   2 17043.3 946.263   4
   6  18   2 18252.0 950.826   4
  -6 -18   2 13929.3 1276.17   1
   6 -18   3 107.272 270.801   1
   6  18   3-146.890 222.612   4
  -6  18   3-443.696 256.415   4
  -6 -18   3 197.462 276.662   1
  -6  18   4 8231.42 650.426   4
   6  18   4 8315.59 664.909   4
  -6 -18   4 7385.08 950.657   1
  -6  18   5 6361.34 586.849   4
   6  18   5 6612.10 581.956   4
  -6  18   6 7401.23 631.385   4
   6  18   6 8150.76 676.303   4
   6  18   7 1626.72 333.582   4
  -6  18   7 1491.89 328.536   4
  -6  18   8 834.252 249.816   4
   6  18   8 485.528 205.059   4
  -6  18   9 24890.9 1176.55   4
   6  18   9 24243.3 1151.59   4
   6  18  10 3206.25 461.922   4
  -6  18  10 3318.58 466.104   4
  -6  18  11 31559.4 1315.11   4
   6  18  11 31192.6 1293.38   4
  -6  18  12 229.869 189.786   4
   6  18  12-69.3437 183.919   4
   6  18  13 393.774 181.268   4
  -6  18  13 661.729 242.287   4
   6  18  14 234.915 147.426   4
   6  20   0 67795.7 1877.75   4
  -6  20   0 63621.3 1812.08   4
   6  20  -1 1159.86 355.697   4
  -6  20  -1 612.618 242.668   4
   6  20   1 810.216 274.177   4
  -6  20   1 608.465 249.413   4
  -6  20  -2 11200.5 750.325   4
   6  20   2 11271.7 777.854   4
  -6  20   2 10513.8 754.450   4
  -6  20   3 65.6893 202.375   4
   6  20   3-152.933 266.701   4
   6  20   4 4715.19 504.981   4
  -6  20   4 3847.00 468.161   4
  -6  20   5 3909.06 465.176   4
   6  20   5 4540.46 498.789   4
  -6  20   6 744.984 238.175   4
   6  20   6 800.080 262.705   4
   6  20   7-198.969 223.264   4
  -6  20   7-141.919 171.206   4
  -6  20   8 2743.34 407.041   4
   6  20   8 2091.99 355.535   4
   6  20   9 27451.6 1150.88   4
  -6  20   9 26651.1 1145.91   4
   6  20  10 874.561 232.410   4
  -6  20  10 1023.81 263.016   4
   6  20  11 11114.7 714.793   4
  -6  20  11 10612.4 699.490   4
   6  20  12-139.300 141.072   4
  -6  20  12 212.934 158.958   4
   6  20  13 82.0159 131.319   4
   6  22   0 224.918 174.776   4
  -6  22   0 385.566 189.348   4
   6  22  -1 155.451 202.821   4
  -6  22   1-151.393 191.168   4
   6  22   1-72.2182 168.551   4
  -6  22  -1 330.610 179.920   4
   6  22   2 239.757 184.206   4
   6  22  -2 216.640 190.590   4
  -6  22   2 240.613 183.307   4
  -6  22  -2 430.534 186.525   4
  -6  22  -3 65.7795 143.334   4
  -6  22   3 20.7376 188.273   4
   6  22   3-15.6942 188.068   4
   6  22  -3 264.979 206.888   4
  -6  22   4 4543.09 460.498   4
   6  22   4 4962.94 525.104   4
  -6  22  -4 4963.77 472.910   4
  -6  22   5 2628.12 365.196   4
   6  22   5 2508.92 388.267   4
  -6  22  -5 3211.26 381.577   4
   6  22   6 2316.96 359.195   4
  -6  22   6 2434.59 352.218   4
   6  22   7 6519.97 561.087   4
  -6  22   7 6356.94 545.288   4
  -6  22   8 726.122 200.020   4
   6  22   8 911.983 213.365   4
   6  22   9 326.321 127.996   4
  -6  22   9 540.578 181.971   4
   6  22  10-4.43773 134.648   4
  -6  24   0 4834.19 438.616   4
   6  24   0 6854.96 565.342   4
   6  24   1-147.695 212.760   4
   6  24  -1-71.0697 180.343   4
  -6  24   1-182.023 183.202   4
  -6  24  -1-241.799 184.757   4
  -6  24   2-125.104 149.046   4
   6  24  -2-322.574 205.200   4
   6  24   2-117.572 196.015   4
  -6  24  -2-77.1587 141.849   4
  -6  24  -3 212.404 131.507   4
  -6  24   3 166.785 134.175   4
   6  24   3 594.870 218.192   4
   6  24  -3 538.951 211.384   4
  -6  24  -4 9173.02 548.825   4
  -6  24   4 9582.45 599.217   4
   6  24  -5 12231.2 708.854   4
   6  24   5 9878.47 632.462   4
   6  24  -6 11016.5 647.737   4
   6  24   6 7854.77 543.029   4
   6  24   7 3952.33 384.479   4
   6  24  -7 5872.06 453.727   4
  -7  -1   0 14.5878 54.2767   1
  -7   1   0-35.5417 84.0816   1
  -7   1   1 5304.61 261.225   1
  -7  -1   1 5934.28 282.770   1
  -7  -1  -1 5246.09 239.041   1
  -7   1   2 7974.02 325.929   1
  -7  -1   2 7220.83 326.852   1
  -7  -1  -2 7872.47 268.002   1
  -7  -1   3 115869. 1322.01   1
  -7   1   3 118608. 1268.89   1
  -7   1   4 5042.18 286.391   1
  -7  -1   4 4647.23 298.466   1
  -7  -1   5 121885. 1521.66   1
  -7   1   5 124036. 1434.73   1
  -7  -1   6 117277. 1586.84   1
  -7   1   6 118766. 1490.76   1
   7  -1   7 50917.9 896.758   1
  -7  -1   7 52563.5 1117.67   1
  -7   1   7 51952.2 1045.63   1
  -7   1   8 5308.13 376.078   1
  -7  -1   8 4691.45 358.167   1
  -7   1   9 642.768 150.713   1
  -7  -1   9 500.455 111.545   1
  -7  -1  10 60160.7 1583.51   2
   7  -1  10 57115.3 1537.62   2
  -7  -1  10 59568.4 1402.25   1
  -7   1  10 62838.0 1571.14   2
   7   1  10 61974.5 1615.46   2
  -7  -1  11 574.819 203.671   2
   7  -1  11 768.656 246.355   2
   7   1  11 456.191 227.179   2
  -7   1  11 464.313 196.956   2
   7   1  12 2794.93 394.419   2
  -7   1  12 2635.60 400.573   2
   7  -1  12 3506.76 456.878   2
  -7  -1  12 3484.67 442.250   2
  -7   1  13 1441.00 355.215   2
   7   1  13 1666.65 359.342   2
  -7  -1  13 1636.00 358.389   2
   7  -1  13 1711.51 382.331   2
   7   1  14 108352. 2562.55   2
   7  -1  14 103712. 2467.76   2
  -7  -1  14 102639. 2350.16   2
  -7   1  14 103069. 2354.52   2
  -7   1  15 41725.9 1575.50   2
   7   1  15 47209.2 1741.44   2
  -7  -1  15 42250.0 1555.48   2
   7  -1  15 43597.5 1625.09   2
   7  -1  16 106998. 2549.10   2
   7   1  16 113368. 2675.84   2
  -7  -1  16 106646. 2408.83   2
  -7   1  16 106207. 2434.21   2
   7   1  17 10016.3 792.912   2
  -7   1  17 10991.9 802.662   2
   7  -1  17 9714.56 758.621   2
   7  -1  18 873.093 270.752   2
   7   1  18 702.511 257.420   2
   7  -1  19 2208.59 331.486   2
   7   1  19 2387.10 383.411   2
   7   1  20 1522.22 263.578   2
  -7  -3   0 12.1343 108.644   1
  -7  -3   1 152716. 1642.72   1
  -7  -3  -1 153082. 1442.27   1
  -7  -3   2 1551.82 202.526   1
  -7  -3  -2 1735.39 154.811   1
  -7  -3  -3 110942. 915.077   1
  -7  -3   3 114241. 1548.35   1
  -7  -3   4 99712.8 1523.63   1
  -7  -3   5 8896.12 489.221   1
  -7  -3   6 4978.14 383.855   1
   7  -3   7 3414.41 297.382   1
  -7  -3   7 3202.34 346.287   1
   7  -3   8 4332.88 358.039   1
  -7  -3   8 4779.89 425.943   1
   7   3   9 2684.07 335.985   2
   7   3   9 2513.49 355.287   4
  -7  -3   9 3318.56 377.137   1
  -7   3   9 2600.29 315.213   2
  -7  -3  10 34838.3 1200.07   1
  -7  -3  10 30854.0 1147.84   2
   7   3  10 34051.1 1228.92   2
  -7   3  10 33411.5 1147.35   2
   7   3  10 34211.0 1280.56   4
   7   3  11 1916.61 394.228   4
  -7  -3  11 1542.69 315.774   2
  -7   3  11 1146.97 253.008   2
   7   3  11 1080.61 258.546   2
   7  -3  11 1220.78 286.128   2
  -7  -3  11 1303.98 271.936   1
   7  -3  12 10950.9 749.308   2
   7   3  12 12208.6 818.226   2
  -7  -3  12 13594.2 834.156   2
  -7   3  12 11119.5 742.312   2
  -7  -3  13 2014.96 397.959   2
   7   3  13 1629.97 346.849   2
   7  -3  13 1848.43 358.260   2
  -7   3  13 1268.41 304.035   2
   7   3  14 20115.0 1139.28   2
  -7  -3  14 20280.1 1044.49   2
   7  -3  14 18162.6 1014.85   2
  -7   3  14 17870.8 1014.80   2
  -7   3  15 2402.13 450.821   2
   7   3  15 3181.36 508.573   2
   7  -3  16 1810.37 341.839   2
   7   3  16 1430.59 337.477   2
  -7   3  17 2319.34 446.791   2
   7   3  17 1574.31 312.572   2
   7   3  18 8461.11 738.442   2
   7   3  19 2596.60 392.426   2
   7   3  20 981.377 251.929   2
  -7  -5   0 1667.18 234.268   1
  -7  -5  -1 86926.9 1330.29   1
  -7  -5   1 88629.7 1451.68   1
  -7  -5   2 4635.69 379.457   1
  -7  -5  -2 4948.98 315.621   1
  -7  -5  -3 31041.0 677.275   1
  -7  -5   3 31806.3 947.115   1
  -7  -5   4 22001.6 824.735   1
  -7  -5  -4 20033.1 428.920   1
  -7  -5   5 17523.6 765.409   1
  -7  -5   6 4794.81 438.474   1
  -7  -5   7 1161.36 237.845   1
   7  -5   7 1242.93 211.115   1
   7  -5   8 18222.2 834.657   1
  -7  -5   8 20005.2 946.326   1
   7   5   9 37712.4 1284.55   4
  -7   5   9 35330.4 1232.42   4
   7  -5   9 37255.7 1219.19   1
   7   5   9 38605.1 1274.64   2
  -7  -5   9 38196.1 1367.63   1
  -7   5   9 39244.6 1211.09   2
  -7   5  10 216991. 2998.31   2
   7   5  10 223034. 3305.95   4
   7   5  10 221798. 3204.05   2
  -7   5  10 226965. 3221.24   4
  -7  -5  10 224046. 3426.11   1
   7   5  11 1646.39 374.692   4
   7   5  11 1409.02 308.893   2
  -7   5  11 1120.29 248.685   2
  -7  -5  11 1353.15 282.103   1
  -7   5  11 2106.94 426.119   4
   7   5  12 109905. 2483.64   2
  -7   5  12 104023. 2249.75   2
   7   5  12 107466. 2539.54   4
  -7   5  13 1800.37 335.968   2
   7   5  13 2097.11 405.998   2
   7   5  14 1677.84 397.801   2
  -7   5  14 662.499 264.805   2
   7   5  15 7252.09 758.430   2
  -7   5  15 6380.80 667.720   2
   7   5  16 8138.19 740.258   2
  -7   5  16 8339.59 756.779   2
   7   5  17 2163.82 354.581   2
  -7   5  17 2994.78 487.366   2
   7   5  18 6554.13 640.224   2
   7   5  19 40902.4 1441.51   2
   7   5  20 9304.50 606.685   2
  -7  -7   0 996.666 235.296   1
  -7  -7  -1 126724. 1839.55   1
  -7  -7   1 123899. 1906.09   1
  -7  -7  -2 1158.61 203.837   1
  -7  -7   2 1143.38 239.608   1
  -7  -7   3 370.469 197.185   1
  -7  -7  -3 455.086 153.102   1
  -7  -7   4 7407.89 540.280   1
  -7  -7  -4 6842.32 362.841   1
  -7  -7   5 735.505 237.301   1
  -7  -7   6 1090.72 247.317   1
   7  -7   7 3.17367 208.906   1
  -7  -7   7 440.134 210.219   1
  -7   7   8 104123. 2004.13   2
  -7   7   8 99796.6 1933.77   4
  -7  -7   8 108863. 2401.23   1
   7   7   8 103448. 2035.58   4
   7  -7   8 106175. 2251.93   1
   7   7   8 104739. 2065.66   2
  -7   7   9 28965.6 1092.42   2
  -7   7   9 28003.3 1087.07   4
   7  -7   9 26841.0 1191.80   1
   7   7   9 29599.3 1149.00   2
  -7  -7   9 27445.7 1283.67   1
   7   7   9 27424.3 1119.17   4
  -7   7  10 160623. 2758.23   4
   7  -7  10 145657. 2874.93   1
  -7  -7  10 152668. 3128.00   1
   7   7  10 157075. 2777.11   2
  -7   7  10 150016. 2582.60   2
   7   7  10 152956. 2738.11   4
  -7   7  11 705.632 248.492   2
   7   7  11 812.924 284.311   2
   7   7  11 698.518 297.407   4
  -7  -7  11 1321.84 377.558   1
  -7   7  11 1006.41 320.035   4
   7   7  12 38105.8 1489.35   2
  -7   7  12 34193.4 1341.21   2
  -7   7  12 38160.7 1497.22   4
   7   7  12 34755.6 1497.51   4
  -7   7  13 747.890 297.643   2
   7   7  13 628.594 287.659   2
   7   7  14 30840.5 1444.10   2
  -7   7  14 27904.7 1286.12   2
  -7   7  15 2423.98 451.039   2
   7   7  15 2843.64 499.160   2
  -7   7  16 981.834 384.236   2
   7   7  16-139.545 374.980   2
  -7   7  17 772.629 398.477   2
   7   7  17 254.065 252.294   2
   7   7  18 13076.3 863.965   2
   7   7  19 33525.2 1246.84   2
   7   7  20 7479.75 513.334   2
  -7  -9   0 108.737 165.047   1
  -7  -9   1 39421.4 1197.49   1
  -7  -9  -1 42257.2 1207.07   1
  -7  -9   2 2527.47 358.177   1
  -7  -9  -2 2616.35 308.044   1
  -7  -9   3 10577.7 670.043   1
  -7  -9  -3 11792.6 620.370   1
  -7  -9  -4 6691.39 452.612   1
  -7  -9   4 6734.66 558.546   1
  -7  -9   5 3428.94 423.175   1
   7   9   6 19176.4 832.411   4
  -7  -9   6 19572.2 1019.75   1
  -7   9   7 47184.2 1359.07   2
  -7  -9   7 52131.2 1715.03   1
   7   9   7 47283.9 1368.95   2
  -7   9   7 48853.1 1345.72   4
   7  -9   7 54158.7 1714.97   1
   7   9   7 51669.8 1410.37   4
   7   9   8 44816.7 1369.80   4
  -7   9   8 46093.0 1383.94   2
   7  -9   8 48347.8 1710.64   1
   7   9   8 46081.2 1424.85   2
  -7   9   8 45786.0 1412.71   4
  -7  -9   8 46094.7 1699.10   1
   7   9   9 5433.12 528.758   2
  -7   9   9 5231.09 522.179   4
  -7   9   9 5112.21 489.549   2
  -7  -9   9 5121.57 616.174   1
   7   9   9 4720.97 504.591   4
   7  -9   9 5421.52 627.271   1
  -7   9  10 33908.1 1267.09   2
   7  -9  10 33732.2 1576.35   1
   7   9  10 36605.7 1372.88   2
   7   9  10 33504.3 1316.00   4
  -7   9  10 33224.5 1317.98   4
  -7  -9  10 33433.3 1587.63   1
   7   9  11 681.677 274.336   4
   7   9  11 337.831 268.872   2
  -7  -9  11-208.485 251.504   1
  -7   9  11 131.872 174.277   2
  -7   9  11 337.509 220.304   4
  -7   9  12 2353.07 394.476   2
  -7   9  12 2959.31 476.800   4
   7   9  12 2377.90 478.836   4
   7   9  12 3265.47 491.180   2
  -7  -9  12 2769.54 522.809   1
  -7   9  13 1087.92 316.587   2
   7   9  13 1157.88 368.560   2
  -7   9  13 1578.45 462.741   4
   7   9  13 1545.46 418.019   4
   7   9  14 7139.11 731.050   2
   7   9  14 6282.82 744.904   4
  -7   9  14 6334.40 649.001   2
  -7   9  15 1486.24 398.895   2
   7   9  15 604.940 251.051   2
   7   9  16 988.267 237.311   2
  -7   9  16 1739.87 448.059   2
  -7   9  17 6140.73 607.694   2
   7   9  17 4584.29 532.967   2
   7   9  18 5791.67 555.949   2
   7   9  19 9371.58 626.183   2
  -7 -11   0-197.656 207.350   1
  -7 -11   1 15574.4 850.830   1
  -7 -11  -1 16183.2 861.906   1
  -7 -11   2 516.422 209.413   1
  -7 -11  -2 659.165 224.301   1
   7  11   3 34376.7 1061.42   4
  -7 -11   3 37722.1 1374.13   1
  -7 -11   4 29904.0 1277.86   1
  -7  11   4 27285.8 983.097   4
   7  11   4 27769.3 1001.26   4
  -7 -11   5 91936.6 2296.77   1
   7  11   5 90459.1 1875.60   4
  -7  11   5 89148.0 1814.41   4
  -7 -11   6 102585. 2505.17   1
  -7  11   6 102339. 2010.32   4
   7  11   6 99573.6 2017.90   4
  -7  11   7 27146.1 1073.94   2
  -7  11   7 32738.7 1180.98   4
   7  11   7 31157.1 1164.35   4
  -7 -11   7 31894.2 1465.27   1
   7 -11   7 33093.3 1512.14   1
   7  11   7 27937.4 1096.12   2
   7  11   8 29548.4 1159.19   4
  -7  11   8 33538.7 1243.40   4
  -7 -11   8 32110.3 1551.67   1
   7  11   8 29999.7 1179.73   2
  -7  11   8 29777.6 1161.55   2
   7 -11   8 32960.2 1559.96   1
  -7  11   9 612.809 266.056   4
   7  11   9 514.852 217.847   4
  -7 -11   9 184.764 220.887   1
  -7  11   9 212.674 161.230   2
   7 -11   9 457.409 248.650   1
   7  11   9 221.101 182.299   2
  -7  11  10 16788.2 955.300   4
   7  11  10 14925.3 940.703   4
  -7 -11  10 13736.9 1092.78   1
   7 -11  10 13345.6 1097.84   1
   7  11  10 14532.3 901.611   2
  -7  11  10 14132.4 856.156   2
  -7  11  11 588.955 283.777   4
   7  11  11 500.991 340.285   4
  -7 -11  11-280.085 361.955   1
  -7  11  11 477.681 255.507   2
   7  11  11 442.838 218.881   2
  -7  11  12 12489.3 919.500   4
   7  11  12 11611.8 864.606   4
   7  11  12 13481.0 932.761   2
  -7  11  12 12725.6 840.425   2
  -7  11  13 1879.50 394.720   2
   7  11  13 2319.71 404.623   2
   7  11  13 1359.99 388.731   4
  -7  11  13 2157.69 473.352   4
   7  11  14 43703.1 1672.75   2
  -7  11  14 42611.8 1513.32   2
   7  11  14 39390.8 1640.17   4
   7  11  15 15924.7 999.880   2
  -7  11  15 14459.1 931.415   2
   7  11  16 45974.2 1621.79   2
  -7  11  16 42862.7 1460.01   2
   7  11  17 7793.52 639.767   2
   7  11  18 1260.85 272.262   2
  -7 -13   0-8.75123 217.253   1
  -7 -13  -1 29489.3 1334.23   1
  -7 -13   1 30283.0 1344.53   1
  -7 -13   2 276.879 213.065   1
  -7 -13  -2-188.344 212.525   1
  -7  13   2 25.4168 132.162   4
  -7 -13   3 52601.8 1832.69   1
   7  13   3 52345.3 1389.01   4
  -7  13   3 50917.7 1393.32   4
  -7 -13   4 37193.9 1573.44   1
   7  13   4 36713.5 1222.32   4
  -7  13   4 37793.6 1240.41   4
  -7 -13   5 94911.9 2611.93   1
  -7  13   5 97501.9 2030.26   4
   7  13   5 93421.8 2011.06   4
   7 -13   5 100834. 2744.89   1
  -7  13   6 36050.7 1262.26   4
   7  13   6 32623.1 1237.65   4
   7 -13   6 35785.5 1709.88   1
  -7 -13   6 33906.2 1604.55   1
  -7  13   7 13737.1 818.899   4
   7  13   7 12078.9 770.061   4
  -7 -13   7 12341.8 1019.61   1
   7 -13   7 13664.5 1099.57   1
  -7 -13   8 156.331 316.144   1
  -7  13   8 9.40248 196.350   4
   7  13   8-112.544 177.629   2
   7  13   8-411.467 258.435   4
   7 -13   8 145.333 263.007   1
  -7 -13   9 672.690 312.957   1
  -7  13   9 718.751 290.666   4
   7  13   9 292.059 194.332   4
   7 -13   9 328.131 316.697   1
   7  13   9 623.601 185.756   2
   7 -13  10 16613.3 1318.48   1
  -7  13  10 21447.9 1113.87   4
   7  13  10 18320.1 1058.46   4
  -7 -13  10 17881.1 1354.19   1
   7  13  10 21081.2 1072.58   2
  -7  13  10 18329.0 936.162   2
  -7  13  11 547.023 247.906   2
   7  13  11 611.281 248.972   2
   7  13  11 491.138 303.031   4
  -7  13  11 291.803 254.220   4
   7  13  12 11413.8 829.193   2
   7  13  12 9714.46 805.753   4
  -7  13  12 10570.0 853.718   4
  -7  13  12 9976.37 716.278   2
   7  13  13 585.002 228.758   4
   7  13  13 409.649 224.226   2
  -7  13  13 1439.40 341.008   2
  -7  13  13 895.498 330.780   4
   7  13  14 33374.0 1487.19   4
  -7  13  14 36426.9 1338.05   2
   7  13  15 14904.9 915.864   2
   7  13  16 30661.0 1227.86   2
   7  13  17 5770.05 501.369   2
  -7 -15   0 234.732 257.233   1
  -7 -15   1 6532.81 747.515   1
  -7  15   1 6643.92 501.684   4
  -7 -15  -1 6110.67 703.321   1
  -7 -15  -2 529.094 250.271   1
   7  15   2 531.437 154.413   4
  -7  15   2 266.260 131.573   4
  -7 -15   2 660.661 356.742   1
   7  15   3 36286.8 1244.05   4
  -7 -15   3 34461.1 1669.46   1
   7 -15   3 39938.5 1886.89   1
  -7  15   3 37464.7 1281.11   4
   7  15   4 12228.3 764.719   4
   7 -15   4 12482.9 1073.97   1
  -7 -15   4 10522.1 965.286   1
  -7  15   4 11602.7 729.288   4
   7  15   5 10010.1 707.199   4
  -7 -15   5 10054.6 984.521   1
   7 -15   5 11490.6 1051.53   1
  -7  15   5 11033.0 747.442   4
  -7  15   6 12531.8 801.337   4
   7  15   6 11104.8 779.984   4
  -7 -15   6 12542.6 1092.82   1
   7 -15   6 12408.6 1120.25   1
  -7  15   7 929.242 247.944   4
   7  15   7 578.859 183.622   4
   7 -15   7 1346.13 432.586   1
  -7 -15   7 1203.81 413.997   1
  -7  15   8 667.666 268.529   4
   7  15   8 616.472 212.177   4
   7 -15   8 1352.10 494.768   1
  -7 -15   8 1244.52 419.297   1
   7  15   9 654.583 208.898   4
  -7  15   9 1220.48 333.562   4
  -7  15  10 1126.63 292.915   4
   7  15  10 1131.08 321.595   4
  -7  15  11-53.7461 216.626   4
   7  15  11-346.388 293.266   4
   7  15  12 9587.77 714.496   2
  -7  15  12 10340.9 810.902   4
   7  15  12 9052.85 751.948   4
   7  15  13-144.829 229.714   4
  -7  15  13 459.520 261.185   4
   7  15  13 39.2783 180.075   2
   7  15  14 10337.5 715.753   2
   7  15  14 8461.80 707.397   4
   7  15  15 1203.88 263.703   2
   7  15  16 3967.93 387.689   2
  -7  17   0 326.660 218.194   4
   7 -17   0 209.841 242.246   1
  -7 -17   0 471.924 342.232   1
  -7  17   1 61136.4 1657.39   4
   7 -17   1 63697.7 2653.88   1
   7  17   1 62185.4 1683.37   4
   7 -17  -1 62572.7 2590.01   1
  -7  17   2 4189.06 479.485   4
   7 -17  -2 3475.52 620.940   1
   7  17   2 4388.40 487.496   4
   7 -17   2 4714.29 785.488   1
  -7 -17   2 4441.41 724.322   1
  -7  17   3 2412.89 349.160   4
   7 -17   3 2595.59 597.663   1
  -7 -17   3 2199.66 554.852   1
   7  17   3 3025.62 417.455   4
   7  17   4-209.979 200.066   4
   7 -17   4 17.2515 251.076   1
  -7  17   4-543.056 248.667   4
  -7  17   5 1232.38 264.006   4
   7  17   5 1329.73 280.820   4
   7 -17   5 1494.66 492.131   1
  -7 -17   5 1835.07 515.015   1
   7  17   6 1188.42 263.858   4
  -7  17   6 922.552 241.381   4
  -7  17   7 223.583 211.428   4
   7  17   7 195.839 207.892   4
  -7  17   8 526.764 233.715   4
   7  17   8 130.536 185.516   4
  -7  17   9 2814.68 444.084   4
   7  17   9 2285.26 401.234   4
  -7  17  10 44181.7 1580.22   4
   7  17  10 44755.4 1602.80   4
   7  17  11 394.313 207.360   4
  -7  17  11 591.075 248.168   4
   7  17  12 22140.0 1107.61   4
  -7  17  12 23299.0 1126.17   4
  -7  17  13 583.170 240.407   4
   7  17  13 855.678 273.549   4
   7  17  14-53.4916 168.454   4
  -7  19   0 672.899 289.843   4
   7  19   0 1644.31 434.907   4
   7  19   1 89986.4 2134.05   4
  -7  19  -1 89856.3 2081.77   4
  -7  19   1 88125.1 2115.03   4
   7  19   2 2561.26 436.317   4
  -7  19   2 1673.26 333.202   4
  -7  19   3-504.395 297.762   4
   7  19   3-319.389 274.479   4
   7  19   4 3122.78 401.907   4
  -7  19   4 2515.61 369.881   4
  -7  19   5 6739.78 603.968   4
   7  19   5 7462.77 631.954   4
  -7  19   6 3526.52 440.691   4
   7  19   6 3982.94 495.323   4
  -7  19   7-37.1840 180.204   4
   7  19   7-435.960 248.813   4
  -7  19   8 12567.8 827.620   4
   7  19   8 13129.6 849.537   4
  -7  19   9 7347.99 637.927   4
   7  19   9 6358.11 623.236   4
   7  19  10 49933.4 1583.74   4
  -7  19  10 50076.1 1584.46   4
  -7  19  11 709.651 254.631   4
   7  19  11 39.0323 165.653   4
  -7  19  12 11890.4 732.829   4
   7  19  12 13153.6 777.458   4
   7  19  13 61.2780 137.906   4
   7  19  14 1335.97 239.603   4
   7  21   0 255.310 238.500   4
  -7  21   0-0.47065 149.128   4
  -7  21  -1 15459.0 887.102   4
   7  21  -1 17075.7 955.538   4
   7  21   1 17008.5 952.407   4
  -7  21   1 15590.7 902.508   4
  -7  21   2 330.977 189.039   4
  -7  21  -2 549.229 169.351   4
   7  21  -2 967.067 316.278   4
   7  21   2 802.851 259.081   4
  -7  21   3 1854.65 328.035   4
   7  21   3 1954.73 355.067   4
  -7  21  -3 2239.98 330.631   4
  -7  21   4 694.598 190.255   4
   7  21   4 106.926 174.566   4
  -7  21  -4 325.615 150.555   4
  -7  21   5-253.612 240.862   4
   7  21   5 9.71731 188.090   4
   7  21   6 356.594 205.158   4
  -7  21   6 365.832 167.044   4
  -7  21   7 1540.31 311.738   4
   7  21   7 1127.10 273.071   4
  -7  21   8 9508.67 671.333   4
   7  21   8 9992.64 686.071   4
   7  21   9 1468.73 270.282   4
  -7  21   9 1357.98 255.845   4
   7  21  10 7778.18 562.769   4
  -7  21  10 7207.94 556.314   4
   7  21  11 261.836 169.203   4
   7  21  12 802.983 187.570   4
   7  23   0-198.584 243.811   4
  -7  23   0-97.9401 158.353   4
  -7  23   1 1347.08 265.455   4
   7  23  -1 1890.96 329.275   4
   7  23   1 1325.72 272.256   4
  -7  23  -1 998.201 219.132   4
  -7  23  -2-9.16441 162.281   4
   7  23  -2-286.896 199.204   4
   7  23   2 55.6718 185.655   4
  -7  23   2-86.8958 172.845   4
  -7  23   3 5793.49 500.715   4
   7  23   3 6711.01 565.514   4
  -7  23  -3 6098.98 492.074   4
  -7  23   4 4297.87 437.038   4
   7  23   4 5316.22 521.983   4
  -7  23  -4 4441.37 415.129   4
  -7  23   5 10911.4 666.154   4
  -7  23  -5 10558.5 593.133   4
  -7  23   6 8094.45 572.123   4
   7  23   6 10117.0 652.486   4
  -7  23   7 3418.93 368.646   4
   7  23   7 4420.54 416.727   4
   7  23   8 2917.08 329.371   4
   7  23   9-410.550 198.686   4
   7  25   0-252.220 202.026   4
   7  25  -1 1398.67 240.620   4
   7  25   1 1198.75 229.648   4
   7  25   2-97.3222 148.055   4
   7  25  -2-361.746 206.871   4
   7  25   3 5501.51 448.237   4
   7  25  -3 6277.22 497.320   4
   7  25  -4 5453.85 462.566   4
   7  25   4 4902.05 423.366   4
  -8   0   0 52888.8 808.975   1
  -8   0  -1 329.697 80.8148   1
  -8   0   1 731.230 129.256   1
  -8   0   2 150311. 1435.21   1
  -8   0   3 122801. 1343.66   1
  -8   0   4 1695.60 175.644   1
  -8   0   5 54381.5 991.944   1
  -8   0   6 175210. 1877.32   1
   8   0   7 94179.6 969.448   1
  -8   0   7 115686. 1624.12   1
  -8   0   8 19989.0 722.418   1
  -8   0   9 482.533 151.126   1
  -8   0  10 451.643 151.046   1
   8   0  10 228.626 133.048   2
  -8   0  10 698.694 201.133   2
   8   0  11 114051. 2340.26   2
  -8   0  11 113356. 2235.00   2
  -8   0  12 239.567 179.597   2
   8   0  12 22.5888 189.842   2
   8   0  13 59869.7 1850.74   2
  -8   0  13 56756.9 1698.06   2
   8   0  14 25278.2 1252.02   2
  -8   0  14 26315.7 1192.91   2
   8   0  15 205175. 3558.35   2
  -8   0  15 199277. 3286.88   2
   8   0  16 69949.1 2087.86   2
  -8   0  16 66762.4 1921.14   2
   8   0  17 4975.02 553.986   2
   8   0  18-1.53967 181.338   2
   8   0  19 507.617 213.426   2
  -8  -2   0 7377.98 322.874   1
  -8  -2  -1 1611.06 149.764   1
  -8  -2   1 1932.69 200.213   1
  -8   2   2 39324.3 837.207   1
  -8  -2  -2 39455.9 642.223   1
  -8  -2   2 38234.7 820.041   1
  -8  -2  -3 18864.2 423.299   1
  -8  -2   3 18864.3 608.344   1
  -8   2   3 19993.0 595.029   1
  -8   2   4 253297. 2153.07   1
  -8  -2   4 250919. 2296.53   1
  -8   2   5 37408.9 853.899   1
  -8  -2   5 36859.7 923.847   1
  -8   2   6 49064.8 1025.62   1
  -8  -2   6 49468.6 1117.70   1
  -8  -2   7 92075.6 1609.86   1
   8  -2   7 92193.0 1378.32   1
  -8   2   7 92012.8 1486.42   1
  -8  -2   8 1051.03 214.150   1
  -8   2   8 1147.61 191.535   1
   8  -2   8 1156.27 172.976   1
  -8   2   9 6202.88 447.671   1
  -8  -2   9 6279.12 471.166   1
   8   2   9 6547.57 516.773   2
  -8   2   9 6020.41 479.716   2
  -8   2  10 840.755 199.312   2
  -8  -2  10 970.322 192.800   1
   8  -2  10 1209.91 237.835   2
   8   2  10 1011.61 295.623   4
   8   2  10 1393.37 294.974   2
  -8  -2  10 1594.59 302.562   2
   8   2  11 11058.1 740.095   2
  -8   2  11 11322.0 711.230   2
   8  -2  11 10916.5 733.932   2
  -8  -2  11 12013.1 760.389   2
   8   2  12 133.738 185.108   2
  -8   2  12 480.685 207.666   2
   8  -2  12 334.384 177.471   2
  -8  -2  12 693.686 276.857   2
   8  -2  13 46133.1 1597.55   2
   8   2  13 46245.2 1675.89   2
  -8  -2  13 45647.3 1532.37   2
  -8   2  13 41190.9 1472.00   2
   8   2  14 9335.09 811.073   2
   8  -2  14 8315.41 722.551   2
  -8  -2  14 9134.78 734.319   2
  -8   2  14 7599.95 685.395   2
   8  -2  15 80983.3 2174.72   2
   8   2  15 84068.0 2351.35   2
  -8  -2  15 82946.0 2117.09   2
  -8   2  15 78070.9 2087.81   2
   8  -2  16 10673.2 778.771   2
   8   2  16 11439.7 887.183   2
  -8   2  16 12595.8 876.678   2
   8   2  17 17537.6 1056.67   2
   8  -2  17 16304.8 938.502   2
  -8   2  17 17339.4 1004.77   2
   8   2  18 584.639 181.014   2
   8   2  19 69.1963 174.962   2
   8   2  20 735.551 202.358   2
  -8  -4   0 423472. 2899.98   1
  -8  -4   1 8656.69 453.871   1
  -8  -4  -1 8056.72 392.638   1
  -8  -4   2 10976.9 522.078   1
  -8  -4  -2 10895.6 419.990   1
  -8  -4   3 141.999 139.762   1
  -8  -4  -3 221.946 70.7043   1
  -8  -4  -4 24605.6 425.167   1
  -8  -4   4 30772.6 922.461   1
  -8  -4   5 4655.38 384.565   1
  -8  -4   6 651.860 182.148   1
  -8  -4   7 8774.08 575.243   1
  -8  -4   8 15308.8 790.519   1
   8  -4   8 14214.7 685.438   1
  -8  -4   9 38660.0 1308.93   1
  -8   4   9 39769.0 1223.97   2
   8   4   9 37606.8 1308.27   4
   8   4   9 37831.8 1264.00   2
   8  -4   9 36668.5 1119.35   1
  -8   4   9 38669.6 1284.27   4
  -8  -4  10 4977.95 517.923   1
   8   4  10 5150.89 553.033   4
  -8  -4  10 5511.58 510.991   2
   8   4  10 5022.37 503.733   2
  -8   4  10 4924.00 465.415   2
  -8   4  10 5708.25 559.568   4
  -8  -4  11 145596. 2699.05   1
   8   4  11 144177. 2704.36   2
  -8   4  11 145196. 2526.80   2
   8   4  11 142226. 2850.43   4
  -8  -4  11 144150. 2566.63   2
  -8  -4  12 1024.53 345.046   2
   8   4  12 885.123 401.681   4
  -8   4  12 478.959 225.838   2
   8   4  12 87.5659 206.601   2
   8   4  13 7732.47 710.820   2
  -8   4  13 7137.97 639.350   2
   8   4  14 655.145 284.244   2
  -8   4  14 712.873 329.557   2
  -8   4  15 2563.86 491.783   2
   8   4  15 3088.05 500.791   2
  -8   4  16 2021.82 416.449   2
   8   4  16 1449.32 341.630   2
   8   4  17 4943.96 577.638   2
  -8   4  17 4415.87 599.216   2
   8   4  18 19478.9 1070.84   2
   8   4  19 7082.73 613.688   2
   8   4  20 14341.7 741.909   2
  -8  -6   0 377187. 3190.52   1
  -8  -6  -1 3856.10 348.817   1
  -8  -6   1 3692.06 356.733   1
  -8  -6   2 53077.2 1273.83   1
  -8  -6  -2 53548.5 1098.53   1
  -8  -6  -3 4199.69 291.999   1
  -8  -6   3 4207.19 408.022   1
  -8  -6   4 26144.6 952.477   1
  -8  -6  -4 25747.2 600.826   1
  -8  -6   5 1590.49 310.394   1
  -8  -6   6 302.011 200.393   1
  -8  -6   7 4699.66 470.609   1
  -8   6   8 3629.10 386.571   2
  -8  -6   8 3410.77 410.247   1
   8  -6   8 3367.49 390.941   1
   8   6   8 3951.37 419.750   2
   8   6   8 4263.11 442.617   4
  -8   6   9 227897. 3111.77   4
   8   6   9 233739. 3232.29   2
  -8   6   9 240739. 3094.32   2
   8   6   9 232393. 3225.20   4
   8  -6   9 231041. 3272.25   1
  -8  -6   9 235495. 3574.53   1
   8   6  10 15013.2 882.451   4
  -8   6  10 14883.1 870.929   4
  -8   6  10 14736.4 810.474   2
   8   6  10 14535.2 862.639   2
  -8  -6  10 14544.5 942.230   1
  -8   6  11 179165. 3045.56   4
   8   6  11 178412. 3076.62   2
  -8   6  11 171053. 2815.63   2
  -8  -6  11 175118. 3296.33   1
   8   6  11 175069. 3150.11   4
   8   6  12 1629.99 442.759   4
   8   6  12 1867.00 356.389   2
  -8   6  12 1694.55 373.115   2
   8   6  13 11617.2 874.849   2
   8   6  13 11600.6 942.634   4
  -8   6  13 10573.5 787.964   2
  -8   6  14 2258.43 470.312   2
   8   6  14 2371.84 462.407   2
   8   6  15 11038.3 876.870   2
  -8   6  15 10506.9 792.959   2
   8   6  16 3485.37 460.069   2
  -8   6  16 4718.49 593.395   2
  -8   6  17 549.151 348.489   2
   8   6  17-226.376 311.486   2
   8   6  18 18082.9 1023.16   2
   8   6  19 20051.8 974.639   2
   8   6  20 40618.6 1208.39   2
  -8  -8   0 589764. 4450.85   1
  -8  -8   1 13957.4 713.223   1
  -8  -8  -1 14604.1 695.870   1
  -8  -8  -2 24019.7 863.305   1
  -8  -8   2 21486.0 905.897   1
  -8  -8   3 1130.61 266.788   1
  -8  -8  -3 1016.29 202.925   1
  -8  -8  -4 10541.2 506.915   1
  -8  -8   4 10193.9 660.081   1
  -8  -8   5 3926.15 443.261   1
  -8  -8   6 2351.26 360.199   1
  -8   8   7 25639.6 997.627   2
   8   8   7 28004.3 1016.43   4
  -8  -8   7 28993.8 1232.06   1
   8   8   7 25996.3 1022.54   2
   8  -8   8 36763.0 1423.95   1
  -8   8   8 34864.3 1177.63   4
   8   8   8 36831.5 1229.40   4
   8   8   8 36562.5 1262.15   2
  -8  -8   8 35578.5 1435.04   1
  -8   8   8 35264.9 1215.51   2
  -8   8   9 118467. 2320.29   4
   8   8   9 115412. 2357.37   4
   8  -8   9 117312. 2642.42   1
   8   8   9 125357. 2433.13   2
  -8  -8   9 120287. 2768.10   1
  -8   8   9 122681. 2315.03   2
  -8   8  10 11717.4 775.975   4
  -8   8  10 11291.7 730.712   2
   8  -8  10 10982.2 863.417   1
   8   8  10 11982.7 803.826   2
   8   8  10 11999.8 824.158   4
  -8  -8  10 11115.7 885.703   1
   8   8  11 76076.0 2083.47   4
   8   8  11 79911.2 2135.24   2
  -8   8  11 77265.9 2035.57   4
  -8   8  11 75504.3 1923.32   2
  -8  -8  11 72850.1 2340.97   1
   8   8  12 513.524 210.136   2
  -8   8  12 473.028 255.055   2
  -8  -8  12 736.141 327.964   1
   8   8  12 504.916 257.492   4
  -8   8  12 1160.13 377.388   4
  -8   8  13 485.955 258.186   2
   8   8  13 339.756 231.430   2
   8   8  13 728.899 361.008   4
   8   8  14 1753.20 425.723   2
  -8   8  14 1517.70 383.708   2
   8   8  14 2189.19 510.615   4
  -8   8  15 1158.34 358.850   2
   8   8  15 953.059 355.406   2
  -8   8  16 1193.39 349.486   2
   8   8  16-250.206 340.698   2
   8   8  17 2118.20 348.695   2
   8   8  18 13225.8 837.492   2
   8   8  19 8577.61 613.649   2
  -8 -10   0 231.019 178.129   1
  -8 -10   1 1540.95 302.238   1
  -8 -10  -1 1650.18 281.422   1
  -8 -10   2 13440.5 802.822   1
  -8 -10  -2 14150.8 759.589   1
  -8 -10   3 4563.30 496.993   1
  -8 -10  -3 5246.54 467.085   1
  -8 -10   4 97294.0 2201.14   1
   8  10   4 88107.6 1718.02   4
   8  10   5 31881.7 1079.02   4
  -8 -10   5 32582.2 1328.96   1
  -8 -10   6 57084.8 1805.30   1
   8  10   6 57302.7 1501.04   4
   8  10   7 89345.3 1954.54   2
  -8  10   7 92883.8 1922.90   4
   8  10   7 92772.0 1979.74   4
  -8 -10   7 94677.5 2435.55   1
  -8  10   7 87528.7 1894.26   2
   8 -10   8 14709.9 996.933   1
   8  10   8 13198.7 769.316   4
   8  10   8 14505.5 825.302   2
  -8 -10   8 13704.3 977.570   1
  -8  10   8 14854.3 806.767   4
  -8  10   8 13451.7 785.870   2
  -8  10   9 11126.6 762.439   4
   8  10   9 10550.0 749.756   4
   8 -10   9 12211.8 959.987   1
   8  10   9 11647.4 770.106   2
  -8 -10   9 11110.7 914.766   1
  -8  10   9 12472.7 772.966   2
  -8  10  10 735.158 225.292   4
   8  10  10 923.258 320.218   4
  -8  10  10 557.396 207.432   2
   8 -10  10 953.178 356.275   1
   8  10  10 505.747 209.460   2
  -8 -10  10-224.831 365.382   1
   8  10  11 1600.85 359.547   2
  -8  10  11 2162.91 372.135   2
   8  10  11 2067.94 408.653   4
  -8 -10  11 1880.59 429.429   1
  -8  10  11 2197.87 384.913   4
   8  10  12 121.458 217.711   4
   8  10  12 471.258 233.077   2
  -8  10  12 519.149 344.014   4
  -8  10  12 366.402 241.893   2
  -8 -10  12 453.196 266.966   1
  -8  10  13 27284.3 1360.37   4
   8  10  13 28000.9 1369.52   2
   8  10  13 25296.2 1338.16   4
  -8  10  13 25700.4 1191.66   2
   8  10  14 3273.09 592.661   4
   8  10  14 3665.71 541.354   2
  -8  10  14 3381.34 504.634   2
   8  10  15 37418.1 1533.53   2
  -8  10  15 33638.3 1374.52   2
   8  10  16 8045.93 702.441   2
  -8  10  16 8515.23 700.673   2
   8  10  17 10768.4 795.103   2
   8  10  18 4676.93 474.438   2
   8  10  19 896.935 222.221   2
  -8 -12   0 46811.9 1587.78   1
  -8 -12   1 285.882 230.677   1
  -8 -12  -1 773.257 273.346   1
  -8  12   2 4061.15 363.534   4
  -8 -12   2 5008.41 557.020   1
  -8 -12  -2 4913.50 539.457   1
  -8  12   3 13800.9 709.265   4
  -8 -12  -3 16837.9 935.139   1
  -8 -12   3 15993.0 998.633   1
   8  12   3 14437.5 723.209   4
  -8  12   4 83947.6 1772.00   4
   8  12   4 85230.0 1810.08   4
  -8 -12   4 89131.2 2353.13   1
  -8  12   5 77612.6 1753.36   4
  -8 -12   5 78429.4 2256.67   1
   8  12   5 74848.0 1769.57   4
   8  12   6 83586.8 1924.14   4
  -8 -12   6 86363.0 2433.18   1
   8  12   7 46801.0 1480.74   4
   8 -12   7 54521.2 2055.87   1
  -8 -12   7 50255.4 1935.65   1
   8  12   7 46336.1 1421.62   2
  -8  12   7 54050.7 1556.69   4
  -8 -12   8 727.590 298.529   1
   8  12   8 1052.95 246.635   4
   8 -12   8 1430.58 389.254   1
  -8  12   8 1462.62 309.590   4
  -8  12   8 1405.36 288.165   2
   8  12   8 908.363 226.874   2
  -8  12   9 1578.30 284.436   2
  -8 -12   9 1416.05 419.067   1
  -8  12   9 1879.43 387.782   4
   8  12   9 1410.22 313.169   4
   8  12   9 1378.49 278.820   2
   8 -12   9 1246.24 376.783   1
  -8  12  10 1191.53 280.786   2
   8  12  10 960.517 324.279   4
  -8 -12  10 704.341 285.045   1
   8  12  10 1259.89 303.665   2
   8 -12  10 756.574 353.944   1
  -8  12  10 1497.20 375.610   4
   8  12  11 20369.0 1122.98   4
  -8  12  11 22576.0 1184.95   4
   8  12  11 22563.8 1170.42   2
  -8  12  11 21473.7 1045.18   2
  -8  12  12 270.568 251.886   4
   8  12  12 273.599 211.819   2
  -8  12  12 715.976 314.996   2
   8  12  12-25.5038 273.176   4
   8  12  13 12454.0 924.429   4
  -8  12  13 14386.2 982.316   4
   8  12  13 14997.1 971.768   2
  -8  12  13 13281.0 824.609   2
   8  12  14 6342.66 636.112   2
  -8  12  14 7062.59 621.082   2
   8  12  14 5994.88 663.945   4
   8  12  15 75981.2 2115.71   2
   8  12  16 26618.9 1196.12   2
   8  12  17 11934.9 748.483   2
   8  12  18 1485.68 262.198   2
  -8 -14   0 6934.98 694.014   1
  -8 -14  -1 424.600 260.694   1
  -8  14   1-150.557 195.080   4
  -8 -14   1 309.564 248.277   1
  -8 -14  -2 15604.4 1038.96   1
  -8 -14   2 14118.3 1018.74   1
  -8  14   2 14188.6 727.434   4
  -8  14   3 8583.58 604.860   4
   8  14   3 8501.93 591.923   4
  -8 -14   3 9155.33 847.155   1
  -8 -14   4 83659.9 2512.72   1
  -8  14   4 90374.7 1966.55   4
   8  14   4 86448.8 1960.68   4
  -8 -14   5 39694.9 1796.95   1
   8 -14   5 44649.0 1949.79   1
  -8  14   5 42506.9 1387.44   4
   8  14   5 42371.4 1411.45   4
   8 -14   6 29877.4 1639.37   1
   8  14   6 26675.4 1154.71   4
  -8 -14   6 27664.1 1537.91   1
  -8  14   6 29416.2 1169.51   4
   8 -14   7 10481.2 1024.78   1
   8  14   7 10342.6 730.621   4
  -8 -14   7 10649.5 979.908   1
  -8  14   7 11132.8 750.275   4
   8  14   8 433.374 215.382   4
   8 -14   8 584.565 346.169   1
  -8 -14   8 502.913 340.696   1
  -8  14   8 260.183 225.657   4
  -8 -14   9 8620.98 974.215   1
  -8  14   9 9908.22 758.294   4
   8 -14   9 8822.53 989.314   1
   8  14   9 7987.19 697.220   4
   8  14   9 7936.03 648.501   2
   8  14  10 35.9686 230.528   4
   8  14  10 0.99679 172.707   2
   8  14  11 15263.0 936.042   2
  -8  14  11 15433.8 963.861   4
   8  14  11 13493.7 927.099   4
   8  14  12-250.247 331.137   4
  -8  14  12-130.764 244.331   4
   8  14  12-20.9107 235.374   2
   8  14  13 23698.5 1161.59   2
  -8  14  13 21475.2 1163.11   4
   8  14  14 2585.72 448.197   4
   8  14  14 2786.54 418.005   2
   8  14  15 27299.2 1168.01   2
   8  14  16 6286.19 528.915   2
  -8 -16   0 47413.3 2023.30   1
  -8  16   1 1588.49 262.679   4
  -8 -16   1 1666.35 479.054   1
  -8 -16  -1 1500.88 412.706   1
  -8 -16   2 18911.2 1311.83   1
  -8  16   2 18634.9 924.724   4
   8 -16   2 20258.1 1409.36   1
   8  16   2 18845.9 932.905   4
   8 -16   3 3640.65 652.059   1
  -8  16   3 4189.88 464.742   4
   8  16   3 4241.06 459.008   4
  -8 -16   3 2714.51 578.894   1
  -8  16   4 4043.57 447.410   4
   8 -16   4 4751.20 747.847   1
  -8 -16   4 4933.77 729.066   1
   8  16   4 3616.31 427.777   4
  -8 -16   5 747.025 352.480   1
  -8  16   5 120.254 201.691   4
   8 -16   5 539.923 373.293   1
   8  16   5 604.087 216.122   4
   8 -16   6 1830.67 537.373   1
   8  16   6 1273.92 284.469   4
  -8  16   6 1309.98 290.271   4
  -8 -16   6 840.683 385.226   1
  -8 -16   7 3644.09 660.440   1
   8 -16   7 4423.39 723.859   1
  -8  16   7 4158.53 483.467   4
   8  16   7 3594.66 479.211   4
  -8  16   8 1944.19 347.867   4
   8  16   8 1573.00 332.285   4
   8  16   9 10302.4 807.881   4
  -8  16   9 11422.7 808.331   4
  -8  16  10 1289.00 323.843   4
   8  16  10 1025.28 308.364   4
  -8  16  11 19416.8 1074.33   4
   8  16  11 17701.9 1021.43   4
  -8  16  12-69.0360 201.631   4
   8  16  12-327.054 272.343   4
  -8  16  13 6517.38 607.069   4
   8  16  13 6478.68 596.036   4
   8  16  14-89.2728 229.524   4
  -8  18   0 119643. 2373.40   4
   8 -18   0 115550. 3808.28   1
   8 -18   1 2969.42 665.924   1
  -8  18   1 2491.63 404.825   4
  -8  18  -1 2897.79 413.789   4
   8 -18  -1 2143.06 603.236   1
   8  18   1 3124.21 490.020   4
  -8 -18   1 1604.63 533.579   1
   8 -18   2 25763.9 1816.43   1
   8 -18  -2 24320.4 1674.12   1
  -8  18   2 27907.3 1192.99   4
   8  18   2 28182.4 1192.38   4
  -8  18   3-160.188 220.104   4
   8 -18   3 69.0724 362.720   1
   8  18   3-76.7102 185.894   4
  -8 -18   3 32.5098 308.782   1
  -8  18   4 733.513 193.332   4
   8  18   4 629.679 206.425   4
   8  18   5 2512.90 376.018   4
  -8  18   5 2117.84 337.763   4
  -8  18   6 464.282 179.464   4
   8  18   6 898.324 208.639   4
  -8  18   7-89.5633 179.658   4
   8  18   7 226.941 196.958   4
  -8  18   8 2706.25 419.287   4
   8  18   8 2562.79 431.478   4
   8  18   9 44298.3 1559.03   4
  -8  18   9 42848.2 1521.59   4
  -8  18  10 2769.14 437.143   4
   8  18  10 2806.47 448.301   4
  -8  18  11 44195.9 1518.73   4
   8  18  11 44173.2 1517.77   4
   8  18  12 477.560 215.442   4
  -8  18  12 168.603 159.306   4
   8  18  13 3538.66 426.649   4
   8  18  14-128.166 186.569   4
  -8  20   0 87015.3 2081.72   4
   8  20   0 91461.0 2170.39   4
  -8  20  -1 1851.92 334.177   4
  -8  20   1 1942.95 337.728   4
   8  20  -1 2507.26 485.907   4
   8  20   1 2264.71 444.919   4
  -8  20  -2 16201.0 887.096   4
  -8  20   2 15720.1 897.583   4
   8  20   2 16245.5 942.111   4
   8  20   3-250.671 278.253   4
  -8  20   3-475.945 254.609   4
  -8  20   4 728.655 193.746   4
   8  20   4 707.679 222.038   4
  -8  20   5 998.433 245.672   4
   8  20   5 1144.81 252.451   4
  -8  20   6 308.439 169.473   4
   8  20   6 482.267 199.954   4
  -8  20   7 1975.89 371.797   4
   8  20   7 2374.16 372.548   4
  -8  20   8 5091.71 529.049   4
   8  20   8 4671.20 499.930   4
   8  20   9 28964.8 1186.14   4
  -8  20   9 28523.9 1175.70   4
  -8  20  10 2160.25 346.577   4
   8  20  10 2023.24 324.767   4
  -8  20  11 15076.3 797.591   4
   8  20  11 17987.4 885.984   4
   8  20  12-81.8635 146.894   4
   8  20  13 306.187 132.043   4
  -8  22   0 1726.48 309.113   4
   8  22   0 1663.62 339.743   4
  -8  22   1-158.571 176.220   4
  -8  22  -1 32.3599 138.902   4
   8  22  -1-248.441 209.439   4
   8  22   1-143.284 190.491   4
   8  22   2 2805.23 398.566   4
  -8  22   2 2409.96 348.445   4
  -8  22  -2 2240.00 339.914   4
   8  22  -2 3330.08 428.466   4
  -8  22  -3 1649.71 285.224   4
   8  22   3 1458.52 316.122   4
  -8  22   3 1377.48 265.410   4
   8  22  -3 2158.60 366.335   4
   8  22   4 9327.84 684.729   4
  -8  22  -4 7818.92 560.063   4
  -8  22   4 7704.24 592.972   4
   8  22   5 6199.36 556.247   4
  -8  22  -5 5549.43 458.088   4
  -8  22   5 5465.79 504.813   4
  -8  22   6 5049.40 485.172   4
   8  22   6 5685.20 509.842   4
  -8  22  -6 5084.05 430.347   4
  -8  22   7 4314.88 433.431   4
   8  22   7 5312.02 473.426   4
   8  22   8 1341.71 237.460   4
   8  22   9 3192.81 349.265   4
   8  22  10 76.9789 118.211   4
   8  24   0 3223.81 396.650   4
   8  24  -1-227.454 213.471   4
   8  24   1-171.245 181.398   4
   8  24  -2 610.433 170.375   4
   8  24   2 227.658 146.016   4
   8  24  -3 1163.75 260.551   4
   8  24   3 1083.73 258.061   4
   8  24  -4 20535.3 931.293   4
   8  24   4 15629.7 797.857   4
   8  24   5 11074.2 644.553   4
   8  24  -5 13039.6 735.247   4
   8  24   6 9752.72 591.220   4
   8  24  -6 11937.0 678.375   4
   8  24   7 6555.73 478.141   4
   8  24  -7 9004.03 566.123   4
  -9   1   0 129.668 97.6545   1
  -9  -1   0-34.9620 100.510   1
  -9  -1   1 3077.47 219.552   1
  -9   1   1 3211.76 238.985   1
  -9  -1  -1 3426.39 218.913   1
  -9  -1   2 3.14536 103.277   1
  -9   1   2 224.658 108.114   1
  -9  -1  -2 142.854 68.1195   1
  -9  -1   3 220995. 1972.06   1
  -9   1   3 224427. 1943.22   1
  -9  -1   4 92709.6 1330.75   1
  -9   1   4 92747.0 1292.27   1
  -9  -1   5 190483. 2013.70   1
  -9   1   5 191103. 1921.73   1
  -9  -1   6 195490. 2130.09   1
  -9   1   6 195167. 2057.52   1
  -9   1   7 94885.1 1511.54   1
  -9  -1   7 94532.6 1554.60   1
  -9  -1   8 58314.8 1296.09   1
  -9   1   8 61053.8 1292.76   1
  -9   1   9 2494.33 283.903   1
  -9   1   9 2333.29 327.690   2
  -9  -1   9 2079.52 262.645   1
   9   1   9 2573.49 358.660   2
   9  -1  10 52404.1 1514.32   2
   9   1  10 54143.7 1565.11   2
  -9   1  10 50588.8 1325.46   1
  -9  -1  10 53470.5 1392.32   1
  -9  -1  10 55837.1 1529.60   2
  -9   1  10 58020.5 1527.71   2
  -9   1  11 381.411 230.840   2
  -9  -1  11 495.016 251.130   2
   9  -1  11 28.9292 188.386   2
   9   1  11 27.9691 215.210   2
  -9  -1  12 354.171 247.660   2
  -9   1  12 108.890 161.774   2
   9  -1  12 252.958 167.748   2
   9   1  12-219.095 241.254   2
  -9   1  13 2813.14 426.036   2
   9  -1  13 3009.90 441.082   2
   9   1  13 2640.18 433.656   2
  -9  -1  13 3044.36 454.974   2
   9  -1  14 104389. 2502.94   2
  -9  -1  14 105184. 2333.87   2
   9   1  14 108106. 2608.47   2
  -9   1  14 104578. 2346.90   2
   9  -1  15 37108.1 1508.06   2
   9   1  15 37743.2 1578.03   2
  -9  -1  15 37369.8 1426.14   2
  -9   1  15 36181.6 1411.51   2
   9  -1  16 76341.9 2124.74   2
   9   1  16 80315.5 2251.98   2
  -9   1  16 80454.3 2087.00   2
   9   1  17 8822.39 743.401   2
   9  -1  17 7863.46 677.397   2
   9   1  18 1060.22 263.527   2
   9  -1  18 1275.78 281.583   2
   9   1  19 229.694 141.522   2
   9   1  20 201.552 142.272   2
  -9  -3   0 587.187 164.591   1
  -9  -3  -1 47072.3 864.914   1
  -9  -3   1 46799.8 957.825   1
  -9  -3   2 9386.73 452.043   1
  -9  -3  -2 9723.90 365.865   1
  -9  -3   3 79968.1 1358.82   1
  -9  -3  -3 79275.3 936.677   1
  -9  -3   4 1861.54 244.497   1
  -9   3   5 17656.4 677.920   1
  -9  -3   5 17023.3 695.605   1
  -9  -3   6 2435.52 295.835   1
  -9   3   6 2180.06 246.171   1
  -9   3   7 38152.4 1085.38   1
  -9  -3   7 40308.6 1148.06   1
  -9  -3   8 17939.6 809.364   1
   9  -3   8 16348.1 682.237   1
  -9   3   9 6619.39 501.648   2
  -9  -3   9 6262.22 508.718   1
   9   3   9 5438.93 528.512   4
   9   3   9 6299.13 521.168   2
  -9   3  10 63980.0 1622.63   2
  -9  -3  10 64811.7 1669.66   1
   9   3  10 66232.8 1853.30   4
   9   3  10 65131.3 1736.74   2
  -9  -3  10 62329.9 1620.20   2
  -9   3  11 61.0342 146.046   2
  -9  -3  11-3.89293 152.175   1
   9  -3  11 211.438 138.121   2
   9   3  11 361.241 191.662   2
   9   3  11 123.791 269.117   4
   9  -3  12 47605.9 1552.18   2
   9   3  12 51709.3 1710.92   2
  -9  -3  12 52714.5 1609.07   2
  -9   3  12 49732.8 1537.92   2
  -9   3  13 1391.97 364.675   2
   9   3  13 935.596 274.834   2
   9  -3  13 820.732 260.623   2
   9  -3  14 20010.9 1068.02   2
   9   3  14 21728.3 1214.26   2
  -9   3  14 20837.7 1072.47   2
   9   3  15 3409.44 549.780   2
   9  -3  15 2475.97 402.482   2
  -9   3  15 3132.02 500.021   2
   9   3  16 11085.4 875.057   2
  -9   3  16 11093.6 819.526   2
   9   3  17 11614.1 879.930   2
   9   3  18 1566.12 319.835   2
   9   3  19 9305.68 698.524   2
   9   3  20 821.728 216.279   2
  -9  -5   0 531.470 174.938   1
  -9  -5   1 171418. 2141.70   1
  -9  -5  -1 175640. 1974.56   1
  -9  -5   2 5099.05 390.342   1
  -9  -5  -2 5194.05 319.976   1
  -9  -5   3 55426.0 1284.33   1
  -9  -5  -3 54742.4 933.438   1
  -9  -5   4 3614.99 373.520   1
  -9  -5  -4 3523.86 195.086   1
  -9  -5   5 122.992 153.010   1
  -9  -5   6 7479.84 543.856   1
  -9  -5   7 17020.0 839.936   1
   9  -5   8 7865.97 541.763   1
  -9   5   8 8489.83 577.256   2
   9   5   8 7599.65 560.375   2
  -9  -5   8 8105.60 617.402   1
  -9   5   9 15820.1 802.101   2
   9   5   9 15625.8 882.087   4
   9  -5   9 14014.4 758.681   1
  -9   5   9 14612.3 801.638   4
   9   5   9 14963.7 825.028   2
  -9  -5   9 14950.3 881.233   1
  -9  -5  10 206581. 3329.23   1
  -9   5  10 216107. 3194.03   4
   9   5  10 205198. 3373.61   4
   9   5  10 207748. 3170.83   2
  -9   5  10 205875. 2944.54   2
  -9   5  11 3768.11 469.277   2
   9   5  11 3328.45 513.969   4
   9   5  11 2507.57 385.527   2
  -9  -5  11 2688.31 428.345   1
   9   5  12 89665.5 2285.22   2
   9   5  12 86300.6 2409.62   4
  -9   5  12 84986.8 2043.59   2
  -9   5  13 553.100 287.794   2
   9   5  13 274.993 213.159   2
   9   5  14 26309.3 1336.59   2
  -9   5  14 26440.1 1197.21   2
   9   5  15-15.7562 219.480   2
  -9   5  15 502.665 280.323   2
  -9   5  16 414.782 335.317   2
   9   5  16-82.6111 239.259   2
   9   5  17 232.294 252.559   2
   9   5  18 16837.6 1000.23   2
   9   5  19 22435.8 1051.27   2
   9   5  20 6461.78 498.984   2
  -9  -7   0 1003.39 257.312   1
  -9  -7  -1 380818. 3365.20   1
  -9  -7   1 367019. 3500.67   1
  -9  -7   2 4972.71 455.572   1
  -9  -7  -2 5015.89 382.154   1
  -9  -7  -3 3246.60 286.840   1
  -9  -7   3 3269.18 373.900   1
  -9  -7  -4 480.350 126.962   1
  -9  -7   4 473.926 202.649   1
  -9  -7   5 14432.4 780.072   1
  -9  -7   6 24473.5 1065.96   1
   9   7   7 6256.18 491.862   4
  -9  -7   7 6808.35 576.355   1
   9   7   7 5943.52 495.279   2
  -9   7   8 57929.0 1515.62   2
   9  -7   8 53876.2 1621.74   1
   9   7   8 55371.8 1537.19   4
   9   7   8 54513.3 1548.12   2
  -9  -7   8 53518.8 1710.89   1
  -9   7   9 24120.6 1025.19   2
  -9   7   9 23782.5 1025.42   4
   9   7   9 25379.8 1102.37   4
   9   7   9 24475.8 1083.90   2
   9  -7   9 23211.5 1120.04   1
  -9  -7   9 23522.3 1197.60   1
  -9   7  10 221170. 3133.62   2
   9   7  10 226093. 3417.58   2
  -9   7  10 223943. 3292.71   4
   9   7  10 214520. 3376.66   4
  -9  -7  10 214280. 3733.52   1
  -9   7  11 1012.94 363.431   4
   9   7  11 616.699 270.599   4
   9   7  11 643.448 279.821   2
  -9  -7  11 450.402 281.755   1
  -9   7  11 977.476 310.077   2
   9   7  12 56818.8 1915.86   4
   9   7  12 61591.0 1939.95   2
  -9   7  12 55667.1 1688.91   2
   9   7  13 787.777 321.600   2
  -9   7  13 713.864 284.851   2
   9   7  13 1478.60 482.400   4
  -9   7  14 758.667 323.264   2
   9   7  14 696.866 318.218   2
  -9   7  15 3085.59 479.695   2
   9   7  15 3198.88 510.413   2
   9   7  16 7031.80 690.380   2
  -9   7  16 6876.17 670.756   2
   9   7  17 1134.20 224.918   2
   9   7  18 9537.85 736.244   2
   9   7  19 37666.2 1300.12   2
  -9  -9   0 327.379 172.279   1
  -9  -9  -1 177901. 2615.64   1
  -9  -9   1 169902. 2653.83   1
  -9  -9   2 5731.66 515.336   1
  -9  -9  -2 5647.54 472.375   1
  -9  -9   3 13897.6 802.188   1
  -9  -9  -3 14889.3 717.658   1
  -9  -9  -4 1114.50 191.668   1
  -9  -9   4 1466.33 299.324   1
  -9  -9   5 1286.54 297.528   1
  -9  -9   6 686.102 201.073   1
   9   9   6 1129.03 224.107   2
   9   9   6 1108.65 239.788   4
  -9   9   7 8583.63 595.202   4
   9   9   7 10157.7 665.386   2
  -9  -9   7 9567.86 760.204   1
   9   9   7 9408.46 609.447   4
  -9   9   7 9706.67 638.007   2
  -9   9   8 115344. 2207.48   4
   9   9   8 122265. 2382.42   2
   9  -9   8 119448. 2726.07   1
  -9  -9   8 116498. 2712.79   1
   9   9   8 117747. 2273.13   4
  -9   9   8 119501. 2275.22   2
  -9   9   9 8952.62 659.806   4
   9   9   9 8634.53 682.999   2
   9  -9   9 9128.95 801.827   1
  -9  -9   9 8925.08 793.327   1
  -9   9   9 9354.30 675.482   2
   9   9   9 8414.14 677.068   4
  -9   9  10 32889.3 1320.84   4
   9   9  10 32452.6 1329.35   4
   9   9  10 34978.6 1384.43   2
   9  -9  10 30458.8 1476.03   1
  -9  -9  10 30793.8 1533.27   1
  -9   9  10 33820.2 1269.67   2
  -9   9  11 3837.26 510.610   4
  -9  -9  11 3288.95 576.509   1
   9   9  11 3192.14 471.823   2
   9   9  11 2601.49 459.285   4
  -9   9  11 3719.26 477.607   2
  -9   9  12 753.226 297.178   2
  -9   9  12 849.766 362.647   4
   9   9  12 59.6412 252.585   2
   9   9  12 127.485 218.790   4
  -9  -9  12 1001.47 395.731   1
  -9   9  13 3981.77 533.817   2
   9   9  13 3809.55 561.509   4
   9   9  13 4078.21 570.838   2
   9   9  14 24754.8 1330.30   4
   9   9  14 25563.6 1317.18   2
  -9   9  14 22095.8 1129.21   2
   9   9  15 3719.67 550.948   2
  -9   9  15 4485.96 570.069   2
   9   9  16 6427.83 622.361   2
  -9   9  16 6842.74 669.439   2
   9   9  17 3140.51 415.986   2
   9   9  18 5312.38 514.139   2
   9   9  19 7678.12 548.217   2
  -9 -11   0 538.307 265.898   1
  -9 -11   1 4910.15 536.436   1
  -9 -11  -1 4734.28 494.736   1
  -9 -11   2 159.650 204.034   1
  -9 -11  -2 412.904 196.065   1
   9  11   3 38537.3 1150.14   4
  -9 -11   3 40583.1 1493.37   1
   9  11   4 30291.0 1058.04   4
  -9 -11   4 32402.8 1370.75   1
   9  11   5 111677. 2098.68   4
  -9 -11   5 114366. 2601.07   1
  -9  11   6 86439.8 1841.56   4
   9  11   6 90112.3 1951.08   4
  -9 -11   6 90799.8 2401.68   1
  -9  11   7 43484.5 1357.05   4
  -9 -11   7 41437.8 1682.89   1
   9  11   7 40441.1 1352.60   2
   9 -11   7 45205.0 1771.40   1
   9  11   7 42909.1 1381.91   4
   9 -11   8 6981.73 726.714   1
   9  11   8 7117.22 588.006   2
  -9 -11   8 6714.10 737.760   1
   9  11   8 6132.54 542.718   4
  -9  11   8 6769.14 577.554   4
  -9  11   8 6592.02 555.240   2
  -9  11   9-31.3476 179.274   2
  -9  11   9 4.68886 168.148   4
   9  11   9-198.105 232.383   4
  -9 -11   9-518.682 351.577   1
   9 -11   9-117.524 264.677   1
   9  11   9-518.873 279.445   2
   9  11  10 19038.3 1040.26   4
   9 -11  10 15928.7 1178.29   1
  -9 -11  10 17985.2 1246.44   1
   9  11  10 20025.4 1080.36   2
  -9  11  10 19049.7 958.838   2
  -9  11  10 18328.3 1015.95   4
  -9  11  11 1054.85 299.106   2
  -9  11  11 1139.38 336.847   4
   9  11  11 1398.41 383.415   4
  -9 -11  11 1074.78 408.235   1
   9  11  11 1651.38 377.224   2
   9  11  12 17083.2 1058.67   4
  -9  11  12 18395.2 1076.96   4
   9  11  12 19382.5 1112.67   2
  -9  11  12 17739.7 972.180   2
  -9  11  13 796.478 342.211   4
   9  11  13 596.041 312.334   4
   9  11  13 571.853 260.439   2
  -9  11  13 818.267 315.980   2
   9  11  14 35380.9 1561.80   4
  -9  11  14 34170.6 1347.85   2
   9  11  15 16663.8 1011.03   2
   9  11  16 43217.3 1557.38   2
   9  11  17 12605.5 796.923   2
   9  11  18 990.242 238.351   2
  -9 -13   0-111.692 260.807   1
  -9 -13   1 5598.62 630.493   1
  -9 -13  -1 5849.03 618.206   1
  -9  13   2 146.924 135.406   4
  -9 -13   2 607.608 300.020   1
  -9 -13  -2 136.616 219.028   1
   9  13   3 83488.0 1818.73   4
  -9 -13   3 84565.0 2383.25   1
  -9  13   3 81516.6 1779.29   4
   9  13   4 51702.4 1483.94   4
  -9  13   4 50819.9 1435.91   4
  -9 -13   4 50563.8 1887.24   1
   9  13   5 82368.8 1926.60   4
  -9  13   5 87385.1 1921.92   4
  -9 -13   5 83284.3 2442.93   1
  -9  13   6 78384.7 1849.24   4
   9  13   6 71876.2 1842.77   4
  -9 -13   6 73259.3 2357.62   1
   9 -13   6 79769.6 2552.71   1
  -9  13   7 13184.5 790.831   4
   9  13   7 11941.3 782.466   4
   9 -13   7 12135.9 1056.81   1
  -9 -13   7 11481.4 978.588   1
  -9 -13   8 2005.65 491.898   1
  -9  13   8 2411.40 400.001   4
   9  13   8 2105.75 383.369   4
   9 -13   8 2818.90 547.903   1
   9  13   8 2188.97 350.859   2
  -9  13   9 4010.77 490.895   4
   9 -13   9 3626.73 619.994   1
   9  13   9 3124.58 473.812   4
  -9 -13   9 3861.42 629.676   1
   9  13   9 4104.31 488.119   2
   9  13  10 8326.97 726.031   4
   9 -13  10 7193.81 876.776   1
   9  13  10 9714.02 739.168   2
  -9  13  10 8804.97 739.252   4
  -9 -13  10 7913.96 893.096   1
  -9  13  10 8757.22 639.550   2
  -9  13  11 123.552 215.360   4
   9  13  11-149.002 231.715   2
   9  13  11-36.0761 210.852   4
   9  13  12 1567.61 336.402   2
  -9  13  12 1689.46 357.364   4
   9  13  12 1026.53 255.091   4
  -9  13  12 1844.95 361.495   2
   9  13  13 802.442 291.849   2
   9  13  13 139.541 245.425   4
  -9  13  13 412.898 273.090   4
   9  13  14 39390.3 1499.99   2
   9  13  14 31270.5 1431.43   4
   9  13  15 12538.4 843.023   2
   9  13  16 34851.3 1294.03   2
   9  13  17 6499.32 523.063   2
  -9 -15   0 235.739 245.364   1
  -9  15   1 3507.34 365.328   4
  -9 -15   1 2989.35 512.785   1
  -9 -15  -1 3992.58 624.410   1
  -9  15   2 1976.64 276.843   4
   9  15   2 1612.71 282.703   4
  -9 -15   2 2327.90 523.139   1
  -9  15   3 21208.5 968.511   4
   9  15   3 21091.7 970.602   4
  -9 -15   3 20432.5 1311.79   1
  -9  15   4 9194.24 658.124   4
   9  15   4 9397.23 674.828   4
   9 -15   4 8432.47 887.621   1
  -9 -15   4 7463.86 817.266   1
   9 -15   5 22282.5 1472.27   1
   9  15   5 21615.7 1034.98   4
  -9 -15   5 21970.1 1411.92   1
  -9  15   5 23835.2 1062.73   4
   9 -15   6 6453.92 795.547   1
  -9  15   6 7295.94 590.272   4
   9  15   6 6794.25 604.749   4
  -9 -15   6 6553.52 793.495   1
  -9  15   7 10391.1 743.901   4
   9 -15   7 10578.1 1077.98   1
   9  15   7 9843.57 744.658   4
  -9 -15   7 9313.96 966.962   1
  -9 -15   8 957.783 372.422   1
  -9  15   8 1156.89 330.314   4
   9  15   8 296.295 183.373   4
   9 -15   8 1225.53 478.722   1
  -9  15   9 695.403 267.198   4
   9  15   9 780.665 274.355   4
  -9  15  10 15084.4 946.577   4
   9  15  10 14664.6 935.778   4
  -9  15  11 140.777 182.517   4
   9  15  11-342.633 301.673   4
   9  15  11 127.014 167.469   2
  -9  15  12 9296.10 743.292   4
   9  15  12 8373.14 703.998   4
   9  15  12 9769.88 723.507   2
   9  15  13 366.729 243.138   4
   9  15  13 26.6507 182.017   2
  -9  15  13 613.971 252.854   4
   9  15  14 11147.4 785.787   4
   9  15  14 12760.0 783.620   2
   9  15  15 1962.16 305.790   2
   9  15  16 5286.34 445.312   2
   9 -17   0 139.667 280.352   1
  -9  17   0 137.365 187.959   4
  -9 -17   0 424.078 315.031   1
   9  17   1 56366.9 1629.72   4
  -9  17   1 56395.8 1606.33   4
   9 -17   1 57681.1 2562.07   1
   9  17   2 2144.32 374.071   4
   9 -17   2 1211.14 415.283   1
  -9  17   2 1676.82 309.550   4
  -9 -17   2 1421.87 452.960   1
   9  17   3 7208.15 622.823   4
  -9 -17   3 5553.96 773.911   1
  -9  17   3 6657.83 573.052   4
   9 -17   3 6836.47 933.455   1
  -9 -17   4-99.4593 259.747   1
   9 -17   4-679.966 449.152   1
  -9  17   4-134.241 236.275   4
   9  17   4-70.6183 210.434   4
  -9 -17   5 642.056 368.622   1
  -9  17   5-208.846 247.892   4
   9  17   5 113.465 233.495   4
   9 -17   5-31.5743 282.971   1
  -9  17   6 154.722 201.766   4
   9  17   6-108.357 248.942   4
  -9  17   7 297.719 214.135   4
   9  17   7 279.772 197.279   4
  -9  17   8 16850.2 961.278   4
   9  17   8 16943.6 1004.24   4
  -9  17   9 6964.70 647.104   4
   9  17   9 6409.42 655.760   4
   9  17  10 29431.1 1305.75   4
  -9  17  10 28109.8 1253.02   4
  -9  17  11 534.381 253.505   4
   9  17  11-494.481 290.738   4
   9  17  12 17523.4 972.694   4
  -9  17  12 16951.0 951.478   4
   9  17  13 250.385 184.699   4
   9  17  14-330.064 221.247   4
   9  19   0 1531.55 471.455   4
  -9  19   0 966.106 306.916   4
  -9  19   1 100257. 2236.60   4
   9  19   1 104726. 2298.97   4
  -9  19  -1 100096. 2178.62   4
   9  19   2 4209.00 517.308   4
  -9  19  -2 4023.30 455.995   4
  -9  19   2 3083.53 394.068   4
  -9  19   3-339.893 283.245   4
   9  19   3-224.831 279.864   4
  -9  19   4 322.045 166.863   4
   9  19   4-5.43471 240.496   4
  -9  19   5 7679.59 640.103   4
   9  19   5 7069.03 625.090   4
   9  19   6 4144.22 509.044   4
  -9  19   6 3635.04 457.391   4
   9  19   7 1135.48 277.004   4
  -9  19   7 1277.24 286.703   4
   9  19   8 24070.0 1133.48   4
  -9  19   8 22412.5 1084.15   4
   9  19   9 5852.18 588.855   4
  -9  19   9 5382.13 550.063   4
   9  19  10 50219.3 1600.40   4
  -9  19  10 46756.7 1509.34   4
   9  19  11 651.464 286.432   4
  -9  19  11 338.589 225.044   4
  -9  19  12 7670.15 579.811   4
   9  19  12 9990.90 676.719   4
   9  19  13 321.103 163.612   4
   9  21   0 613.355 271.602   4
  -9  21   0 46.8724 142.480   4
   9  21  -1 16733.1 935.017   4
  -9  21  -1 15620.8 850.783   4
   9  21   1 15992.3 940.888   4
  -9  21   1 14635.9 834.386   4
   9  21   2-101.435 200.233   4
   9  21  -2 457.702 255.148   4
  -9  21   2 34.5504 140.752   4
  -9  21  -2 154.033 133.646   4
  -9  21   3 2616.46 361.601   4
   9  21   3 2556.88 390.378   4
  -9  21  -3 2547.75 337.613   4
  -9  21   4 185.313 146.282   4
  -9  21  -4 365.060 168.064   4
   9  21   4 268.532 232.213   4
  -9  21   5 1277.73 269.633   4
   9  21   5 1754.41 317.502   4
  -9  21  -5 1744.60 286.573   4
  -9  21   6 2472.05 349.982   4
   9  21   6 3038.22 408.669   4
   9  21   7 1768.99 294.449   4
  -9  21   7 1746.85 299.179   4
   9  21   8 5901.89 529.549   4
  -9  21   8 4755.18 465.138   4
   9  21   9 1505.13 268.635   4
   9  21  10 11368.4 697.175   4
   9  21  11 511.867 198.230   4
   9  23   0-54.3677 200.629   4
   9  23   1-91.3673 203.256   4
   9  23  -1-262.822 231.691   4
   9  23   2-165.405 178.982   4
   9  23  -2 12.9985 162.054   4
   9  23  -3 9847.30 693.531   4
   9  23   3 8115.55 628.321   4
   9  23   4 5901.99 523.203   4
   9  23  -4 7288.25 601.272   4
   9  23   5 14100.7 769.371   4
   9  23  -5 17842.3 911.002   4
   9  23   6 9383.63 621.045   4
   9  23  -6 13120.7 752.473   4
   9  23   7 2651.00 339.012   4
   9  23   8 1568.67 244.723   4
   9  25   0-459.201 194.452   4
   9  25   1 106.822 167.856   4
   9  25  -1 176.729 148.410   4
   9  25  -2-193.824 188.465   4
   9  25   2-197.963 177.613   4
   9  25   3 6688.78 490.477   4
   9  25  -3 8496.59 561.093   4
   9  25   4 4890.81 417.517   4
   9  25  -4 5923.58 479.923   4
 -10   0   0 256965. 2005.82   1
 -10   0  -1 390.998 86.8103   1
 -10   0   1 553.780 130.916   1
 -10   0   2 7111.86 363.316   1
 -10   0   3 3109.55 228.182   1
 -10   0   4 221805. 2054.56   1
 -10   0   5 212514. 2094.51   1
 -10   0   6 367474. 2903.29   1
 -10   0   7 384670. 3153.33   1
 -10   0   8 23870.7 840.009   1
  10   0   9 23384.0 986.803   2
 -10   0   9 24861.4 909.491   1
 -10   0   9 25678.7 1001.43   2
 -10   0  10 23683.2 931.333   1
  10   0  10 25473.7 1080.59   2
 -10   0  10 26268.3 1042.79   2
 -10   0  11 31231.3 1181.34   2
  10   0  11 30880.4 1237.42   2
 -10   0  12 741.204 290.158   2
  10   0  12-238.700 229.642   2
 -10   0  13 33117.9 1289.39   2
  10   0  13 31985.2 1380.56   2
  10   0  14 8916.92 767.748   2
 -10   0  14 10332.1 775.922   2
  10   0  15 189136. 3439.75   2
 -10   0  15 186321. 3150.58   2
  10   0  16 18350.7 1068.25   2
  10   0  17 13682.4 910.489   2
  10   0  18 4968.07 544.308   2
  10   0  19-74.9777 138.566   2
 -10  -2   0 17871.9 546.549   1
 -10  -2   1 5561.36 334.459   1
 -10  -2  -1 5160.19 275.901   1
 -10   2   2-113.339 149.224   1
 -10  -2   2 154.152 123.662   1
 -10  -2  -2 219.163 101.761   1
 -10  -2   3 26960.8 762.086   1
 -10  -2  -3 26749.6 608.635   1
 -10   2   3 28093.2 769.251   1
 -10  -2   4 89944.5 1423.55   1
 -10   2   4 90365.4 1395.49   1
 -10  -2   5 59624.0 1213.91   1
 -10   2   5 57625.6 1153.47   1
 -10   2   6 41116.0 1008.79   1
 -10  -2   6 40292.3 1049.98   1
 -10  -2   7 101565. 1746.30   1
 -10   2   7 99714.9 1668.78   1
 -10  -2   8 7838.76 507.058   1
 -10   2   8 7716.40 504.324   1
 -10   2   9 4122.64 388.535   1
 -10  -2   9 3814.53 376.123   1
  10   2   9 4100.69 426.767   2
  10   2   9 3736.81 457.027   4
 -10  -2   9 4405.35 443.384   2
 -10   2   9 4394.68 421.593   2
  10   2  10 2642.82 429.897   4
 -10   2  10 2247.04 331.018   2
 -10  -2  10 1790.23 268.421   1
  10  -2  10 2116.49 335.348   2
  10   2  10 2409.02 374.185   2
 -10  -2  10 2998.54 407.378   2
 -10   2  11 1197.10 273.082   2
 -10  -2  11 1108.74 267.610   1
  10  -2  11 821.414 217.090   2
  10   2  11 859.434 230.414   2
 -10  -2  11 1478.17 351.138   2
  10  -2  12-72.3030 168.120   2
  10   2  12 345.145 219.332   2
 -10   2  12 60.3323 252.203   2
  10   2  13 17724.6 1037.38   2
  10  -2  13 17777.3 1007.08   2
 -10  -2  13 18794.6 986.799   2
 -10   2  13 16540.1 934.686   2
  10  -2  14 8353.48 707.373   2
 -10   2  14 8530.63 726.930   2
  10   2  14 8239.38 777.215   2
  10  -2  15 35688.8 1446.74   2
  10   2  15 36713.0 1572.98   2
 -10   2  15 37021.4 1405.57   2
  10  -2  16 21933.1 1110.17   2
  10   2  16 23039.8 1243.19   2
  10   2  17 9295.12 765.841   2
  10  -2  17 8612.41 677.388   2
  10   2  18 959.866 244.802   2
  10   2  19 245.447 148.868   2
  10   2  20 229.052 156.029   2
 -10  -4   0 179363. 1987.53   1
 -10  -4   1 136.714 159.257   1
 -10  -4  -1 577.177 169.127   1
 -10  -4  -2 73841.5 1134.35   1
 -10  -4   2 72672.1 1380.70   1
 -10  -4  -3 30514.1 657.856   1
 -10  -4   3 31904.0 944.989   1
 -10  -4  -4 19915.9 473.428   1
 -10  -4   4 21900.5 810.068   1
 -10  -4   5 186.380 162.694   1
 -10  -4   6 4165.64 412.930   1
 -10  -4   7 4242.13 430.944   1
  10  -4   8 2777.69 319.020   1
  10   4   8 3183.67 380.745   2
 -10  -4   8 3259.86 394.277   1
 -10   4   8 3114.01 351.741   2
 -10   4   9 64153.2 1691.23   4
  10   4   9 69712.5 1873.17   4
  10   4   9 66966.3 1711.93   2
 -10  -4   9 69572.5 1787.39   1
 -10   4   9 69032.2 1663.98   2
  10   4  10 4292.47 559.358   4
  10   4  10 4684.51 519.071   2
 -10  -4  10 4323.66 484.390   1
 -10   4  10 4467.83 462.138   2
  10   4  11 149847. 3068.55   4
  10   4  11 147339. 2809.34   2
 -10  -4  11 149245. 2802.15   1
 -10   4  11 145687. 2575.76   2
  10   4  12 2044.36 379.603   2
 -10   4  12 2479.27 402.978   2
  10   4  13 9696.59 798.089   2
 -10   4  13 8644.08 685.419   2
 -10   4  14 2503.52 435.241   2
  10   4  14 2327.57 451.457   2
  10   4  15 158.992 219.425   2
 -10   4  15 469.841 354.267   2
 -10   4  16 658.475 330.906   2
  10   4  16 369.160 229.927   2
  10   4  17 5384.99 583.722   2
  10   4  18 6346.26 615.736   2
  10   4  19 4341.91 482.193   2
  10   4  20 16139.8 774.411   2
 -10  -6   0 378517. 3335.10   1
 -10  -6   1 7024.29 487.126   1
 -10  -6  -1 7072.62 449.355   1
 -10  -6   2 107418. 1886.76   1
 -10  -6  -2 108886. 1616.71   1
 -10  -6   3 3972.61 403.565   1
 -10  -6  -3 4234.76 313.527   1
 -10  -6  -4 14616.5 475.854   1
 -10  -6   4 15462.3 762.069   1
 -10  -6   5 38854.2 1231.01   1
 -10  -6   6 31605.1 1153.76   1
 -10  -6   7 49.2715 215.220   1
  10   6   8 9018.76 670.937   4
  10  -6   8 8001.40 593.279   1
  10   6   8 9695.74 662.338   2
 -10  -6   8 8865.45 694.682   1
 -10   6   8 10174.8 639.175   2
 -10   6   9 96956.2 2060.50   4
  10   6   9 103510. 2264.74   4
  10  -6   9 95716.5 2129.19   1
  10   6   9 101033. 2171.77   2
 -10  -6   9 104344. 2415.36   1
 -10   6   9 104698. 2088.18   2
  10   6  10 22527.0 1124.71   4
 -10   6  10 23142.2 1071.45   4
  10   6  10 23319.4 1110.32   2
 -10  -6  10 21650.2 1162.37   1
 -10   6  10 21432.6 1009.93   2
 -10  -6  11 206090. 3663.55   1
  10   6  11 214188. 3454.06   2
  10   6  11 203225. 3615.87   4
 -10   6  11 201546. 3079.99   2
 -10  -6  12 137.046 184.754   1
  10   6  12 320.348 196.978   2
 -10   6  12 663.534 287.762   2
  10   6  12 404.977 312.748   4
  10   6  13 2999.57 581.957   4
  10   6  13 1871.13 393.518   2
 -10   6  13 2042.17 395.957   2
 -10   6  14 786.748 325.783   2
  10   6  14 158.574 242.945   2
 -10   6  15 6575.27 636.275   2
  10   6  15 6171.81 668.694   2
 -10   6  16 1750.31 413.840   2
  10   6  16 537.272 258.667   2
  10   6  17-499.764 328.413   2
  10   6  18 13316.2 856.510   2
  10   6  19 10665.9 707.365   2
 -10  -8   0 671668. 4975.36   1
 -10  -8   1 8272.47 601.282   1
 -10  -8  -1 9229.30 587.333   1
 -10  -8   2 65445.4 1637.16   1
 -10  -8  -2 67465.3 1480.39   1
 -10  -8  -3 517.196 143.796   1
 -10  -8   3 877.123 267.321   1
 -10  -8  -4 801.680 161.806   1
 -10  -8   4 639.701 232.971   1
 -10  -8   5 12050.1 760.795   1
  10   8   6 10034.6 616.157   4
 -10  -8   6 10938.4 761.806   1
 -10   8   7 2139.40 332.337   2
 -10  -8   7 1628.03 332.159   1
  10   8   7 1712.15 266.317   4
 -10   8   7 1609.41 259.013   4
  10   8   7 2068.88 304.853   2
  10   8   8 17893.3 899.247   4
  10   8   8 17590.7 910.234   2
  10  -8   8 16380.7 964.862   1
 -10   8   8 14775.9 800.475   4
 -10  -8   8 17451.4 1031.16   1
 -10   8   8 19066.5 911.067   2
  10   8   9 146546. 2688.37   4
  10   8   9 150619. 2742.68   2
 -10   8   9 143507. 2560.71   4
 -10  -8   9 141405. 3043.60   1
  10  -8   9 145153. 2974.17   1
 -10   8   9 149240. 2583.64   2
 -10   8  10 976.214 284.801   4
  10   8  10 1348.31 367.868   4
  10  -8  10 793.960 282.699   1
 -10  -8  10 998.668 363.264   1
 -10   8  10 1378.83 351.764   2
  10   8  10 1406.14 343.508   2
 -10   8  11 42961.6 1536.14   4
  10   8  11 41303.1 1577.78   4
  10   8  11 44270.6 1627.28   2
 -10  -8  11 40282.3 1743.56   1
 -10   8  11 42622.7 1448.67   2
  10   8  12 644.141 314.950   4
 -10   8  12 669.727 286.260   2
  10   8  12 854.444 286.487   2
 -10  -8  12 304.577 188.639   1
  10   8  13 29954.3 1448.81   4
  10   8  13 32312.0 1462.55   2
 -10   8  13 30149.6 1266.65   2
 -10   8  14 1226.28 376.734   2
  10   8  14 220.802 270.846   2
 -10   8  15 280.268 312.234   2
  10   8  15 156.282 253.923   2
  10   8  16 1455.88 342.880   2
  10   8  17 1440.34 312.432   2
  10   8  18 11194.5 754.332   2
  10   8  19 5596.09 497.326   2
 -10 -10   0 51693.2 1534.76   1
 -10 -10   1 1049.07 283.026   1
 -10 -10  -1 794.809 236.367   1
 -10 -10  -2 8269.97 611.933   1
 -10 -10   2 8067.82 661.508   1
 -10 -10   3 4487.37 523.000   1
 -10 -10  -3 4402.71 440.986   1
  10  10   4 18362.9 821.366   4
 -10 -10   4 19212.1 1028.08   1
  10  10   5 36582.9 1202.10   4
 -10 -10   5 37957.1 1465.88   1
 -10  10   6 8066.88 551.858   4
  10  10   6 9075.48 623.700   4
 -10 -10   6 8508.43 727.957   1
  10  10   6 8175.96 594.774   2
 -10  10   7 13394.6 751.389   4
  10  10   7 14589.3 785.371   4
  10  10   7 14765.1 822.056   2
 -10 -10   7 14789.0 975.242   1
 -10  10   7 13648.1 770.663   2
  10 -10   8 10159.7 827.178   1
  10  10   8 9468.18 678.428   4
  10  10   8 9681.16 709.517   2
 -10  10   8 10237.9 681.375   4
 -10 -10   8 9521.75 818.048   1
 -10  10   8 10911.3 706.842   2
 -10  10   9 11820.5 761.847   4
  10  10   9 10442.4 731.572   4
  10  10   9 12338.1 804.389   2
  10 -10   9 10551.5 894.070   1
 -10 -10   9 10721.7 910.701   1
 -10  10   9 11850.3 751.744   2
 -10  10  10 1019.22 304.399   2
 -10  10  10 431.525 196.403   4
  10  10  10 518.184 284.463   4
  10 -10  10 595.738 285.991   1
  10  10  10 93.9935 207.210   2
 -10 -10  10-174.455 278.024   1
 -10  10  11 7784.04 696.536   4
  10  10  11 7342.73 722.434   4
  10  10  11 8308.57 718.236   2
 -10 -10  11 7062.96 824.026   1
 -10  10  11 7962.10 657.213   2
 -10  10  12 627.771 323.261   4
  10  10  12 481.191 273.270   4
 -10  10  12 1111.99 349.045   2
  10  10  12 645.031 256.697   2
 -10 -10  12 355.131 296.235   1
  10  10  13 31484.4 1480.70   4
  10  10  13 35561.2 1553.62   2
 -10  10  13 32093.3 1300.43   2
  10  10  14 7383.46 753.326   4
  10  10  14 8535.12 785.463   2
 -10  10  14 7086.17 636.733   2
  10  10  15 20077.7 1131.42   2
  10  10  16 12141.6 843.680   2
  10  10  17 6043.99 572.868   2
  10  10  18 2131.01 325.572   2
 -10 -12   0 54706.9 1769.12   1
 -10 -12   1 297.925 213.942   1
 -10 -12  -1 176.689 209.799   1
 -10 -12   2 2835.27 461.587   1
 -10 -12  -2 3467.44 458.925   1
 -10  12   3 8087.98 545.361   4
  10  12   3 8737.41 582.116   4
 -10 -12   3 9918.80 807.836   1
  10  12   4 122928. 2236.04   4
 -10 -12   4 122016. 2795.28   1
 -10  12   5 59452.1 1534.37   4
  10  12   5 62598.3 1655.57   4
 -10 -12   5 63650.5 2056.66   1
 -10  12   6 91576.4 1941.46   4
  10  12   6 93251.8 2050.83   4
 -10 -12   6 91700.0 2546.54   1
  10 -12   7 46717.5 1903.46   1
  10  12   7 42743.2 1414.49   2
 -10  12   7 47685.8 1454.44   4
 -10 -12   7 42888.6 1774.72   1
  10  12   7 43543.7 1442.97   4
 -10  12   8 294.522 235.042   4
  10 -12   8-180.505 246.380   1
 -10 -12   8 25.6684 216.226   1
  10  12   8-149.337 223.978   4
  10  12   8-68.3545 222.410   2
  10  12   9 31506.0 1341.02   4
  10 -12   9 30827.6 1679.03   1
  10  12   9 34580.7 1373.52   2
 -10  12   9 33991.2 1343.43   4
 -10 -12   9 31763.7 1668.56   1
 -10  12   9 33385.0 1223.27   2
 -10  12  10 1872.67 355.215   2
 -10 -12  10 858.180 247.948   1
  10 -12  10 829.693 383.784   1
  10  12  10 1369.81 296.652   2
 -10  12  10 1076.21 291.342   4
  10  12  10 1110.06 339.778   4
 -10  12  11 3659.51 465.205   2
  10  12  11 2846.38 473.504   4
 -10  12  11 4078.65 536.315   4
  10  12  11 3267.51 455.576   2
 -10 -12  11 2958.38 592.668   1
 -10  12  12 674.426 295.463   2
 -10  12  12 36.7353 221.703   4
  10  12  12-152.042 254.666   2
  10  12  12-258.447 272.537   4
  10  12  13 12799.9 938.250   4
  10  12  13 13857.5 950.107   2
  10  12  14 3070.64 503.953   4
  10  12  14 4052.45 549.644   2
  10  12  15 70135.0 2013.33   2
  10  12  16 19067.6 1013.37   2
  10  12  17 11714.7 715.646   2
  10  12  18 1491.10 255.468   2
 -10 -14   0 15653.0 1077.27   1
 -10  14   1 251.398 135.514   4
 -10 -14   1-60.0083 252.415   1
 -10 -14  -1 68.8628 238.356   1
 -10 -14   2 6397.45 724.633   1
 -10 -14  -2 6434.88 705.513   1
  10  14   2 5406.47 466.942   4
 -10  14   2 5320.43 460.960   4
  10  14   3 5578.55 498.626   4
 -10 -14   3 5277.63 682.926   1
 -10  14   3 5622.81 501.283   4
  10  14   4 63409.6 1705.79   4
 -10  14   4 60338.1 1597.87   4
 -10  14   5 34546.5 1235.30   4
 -10 -14   5 31949.3 1602.07   1
  10  14   5 33185.2 1272.75   4
  10 -14   6 24803.6 1518.85   1
 -10  14   6 24317.9 1052.75   4
 -10 -14   6 24181.6 1436.02   1
  10  14   6 24439.4 1122.95   4
 -10  14   7 27040.0 1160.21   4
 -10 -14   7 25783.2 1511.64   1
  10  14   7 25961.3 1174.80   4
  10 -14   7 27065.3 1609.01   1
 -10  14   8 420.627 265.449   4
  10  14   8 227.730 182.205   4
  10 -14   8 277.659 298.810   1
 -10 -14   8 344.820 337.364   1
 -10  14   9 3130.24 477.355   4
 -10 -14   9 2715.67 575.425   1
  10 -14   9 2921.88 574.130   1
  10  14   9 3070.99 458.374   4
  10  14   9 3105.97 431.397   2
  10  14  10 318.897 234.880   4
  10  14  10-279.662 235.600   2
 -10  14  10 66.6083 196.821   4
 -10  14  11 2841.27 420.051   4
  10  14  11 2988.46 435.494   2
  10  14  11 2538.70 416.613   4
 -10  14  12 37.5161 198.055   4
  10  14  12-569.601 311.008   4
  10  14  12-426.593 241.029   2
 -10  14  13 2400.56 430.695   4
  10  14  13 2254.84 407.967   4
  10  14  13 2263.47 343.244   2
  10  14  14 1749.72 330.769   2
  10  14  14 1723.63 371.379   4
  10  14  15 23588.7 1068.15   2
  10  14  16 8279.10 608.537   2
 -10 -16   0 14207.3 1143.73   1
 -10  16   0 15602.8 812.532   4
 -10 -16   1 554.249 374.119   1
 -10  16   1 84.6737 160.267   4
 -10  16   2 19248.2 934.618   4
  10  16   2 21188.9 1002.10   4
 -10 -16   2 17694.3 1292.94   1
 -10 -16   3 2961.69 554.077   1
  10  16   3 3189.44 424.427   4
 -10  16   3 3393.29 404.677   4
  10 -16   3 2693.38 555.620   1
 -10 -16   4 2968.28 584.799   1
  10 -16   4 2369.53 493.189   1
  10  16   4 3287.68 443.341   4
 -10  16   4 3170.97 396.289   4
 -10 -16   5 558.921 356.084   1
 -10  16   5 532.480 237.402   4
  10  16   5 484.249 218.009   4
  10 -16   5 653.320 308.795   1
 -10  16   6 2384.79 366.524   4
  10  16   6 2029.15 358.028   4
  10 -16   6 2073.27 497.177   1
 -10 -16   6 2546.97 550.169   1
  10  16   7 1961.85 374.000   4
 -10  16   7 2372.49 357.074   4
 -10  16   8 3596.58 492.058   4
  10  16   8 2931.51 439.589   4
  10  16   9 33906.4 1405.15   4
 -10  16   9 34688.5 1389.50   4
 -10  16  10 415.639 207.886   4
  10  16  10 382.899 198.213   4
  10  16  11 5365.58 562.257   4
 -10  16  11 5840.21 591.987   4
  10  16  12-174.278 233.012   4
 -10  16  12-62.2958 197.652   4
  10  16  13 4404.74 510.376   4
  10  16  14-97.5002 213.851   4
  10 -18   0 96523.7 3496.21   1
 -10  18   0 100258. 2171.68   4
 -10 -18   1 1091.70 423.650   1
  10 -18  -1 901.106 350.746   1
  10 -18   1 862.064 375.425   1
 -10  18  -1 1281.31 298.237   4
 -10  18   1 1228.23 298.789   4
  10 -18  -2 15312.4 1361.93   1
  10 -18   2 20144.5 1617.19   1
  10  18   2 20979.0 1041.04   4
 -10 -18   2 13812.6 1238.47   1
 -10  18   2 18683.8 953.288   4
 -10  18   3-457.856 279.294   4
  10  18   3 58.2933 189.207   4
 -10  18   4 5317.90 528.973   4
  10  18   4 5493.46 566.286   4
 -10  18   5 4368.75 472.013   4
  10  18   5 3947.78 465.968   4
 -10  18   6 1474.58 285.017   4
  10  18   6 2000.63 390.986   4
 -10  18   7 2768.87 384.881   4
  10  18   7 2912.99 442.264   4
 -10  18   8 8598.90 695.931   4
  10  18   8 10160.5 777.332   4
  10  18   9 41471.8 1543.59   4
 -10  18   9 39403.6 1426.12   4
  10  18  10 3144.29 418.872   4
 -10  18  10 3048.78 435.246   4
  10  18  11 26124.2 1189.76   4
 -10  18  11 25599.0 1124.57   4
 -10  18  12 447.553 201.163   4
  10  18  12-1.40554 160.211   4
  10  18  13 1096.67 239.002   4
  10  18  14-253.886 179.118   4
 -10  20   0 80386.1 1963.60   4
  10  20   0 87793.8 2157.07   4
 -10  20   1 1776.25 315.536   4
 -10  20  -1 2051.98 336.506   4
  10  20   1 2588.80 438.656   4
  10  20  -1 2718.18 446.174   4
  10  20   2 10211.2 747.848   4
 -10  20  -2 8812.47 626.261   4
 -10  20   2 8112.03 632.294   4
 -10  20   3-37.9384 198.824   4
  10  20   3-471.629 301.814   4
 -10  20  -3-124.257 164.518   4
  10  20   4-75.0534 222.214   4
 -10  20   4 162.875 140.837   4
 -10  20   5 829.409 213.142   4
  10  20   5 1199.84 287.843   4
 -10  20   6 404.526 211.172   4
  10  20   6-75.6698 166.349   4
  10  20   7 1647.39 323.504   4
 -10  20   7 2151.77 368.170   4
 -10  20   8 2424.71 370.114   4
  10  20   8 2564.60 389.156   4
  10  20   9 21644.6 1032.95   4
  10  20  10 499.164 202.994   4
  10  20  11 19829.2 933.314   4
  10  20  12 92.8830 126.138   4
  10  22   0 770.630 228.209   4
  10  22   1-148.655 223.426   4
  10  22  -1-19.4214 182.092   4
  10  22   2 2171.45 365.684   4
  10  22  -2 2591.77 382.150   4
  10  22   3 375.246 199.462   4
  10  22  -3 652.113 226.560   4
  10  22   4 8276.84 642.422   4
  10  22  -4 11970.0 783.251   4
  10  22   5 7452.05 607.604   4
  10  22   6 4395.35 451.573   4
  10  22   7 2856.94 361.621   4
  10  22   8 307.231 136.470   4
  10  22   9 1579.87 249.737   4
  10  22  10 242.200 139.845   4
  10  24   0 1579.95 247.712   4
  10  24   1-337.598 213.570   4
  10  24  -1-200.478 212.200   4
  10  24   2 1262.80 253.296   4
  10  24  -2 1309.48 273.532   4
  10  24  -3 2230.06 328.247   4
  10  24   3 1772.01 294.286   4
  10  24   4 12306.6 686.338   4
  10  24  -4 14947.9 779.147   4
  10  24   5 6305.03 487.785   4
  10  24  -5 7777.39 563.735   4
  10  24   6 6470.86 487.673   4
  10  24  -6 8495.39 557.465   4
 -11  -1   0 742.370 171.972   1
 -11   1   0 155.916 121.588   1
 -11  -1   1 89206.0 1257.53   1
 -11   1   1 92224.5 1332.63   1
 -11  -1  -1 93451.4 1242.21   1
 -11   1   2 167.294 116.260   1
 -11  -1  -2 23.5293 98.3034   1
 -11  -1   2-177.172 149.108   1
 -11   1   3 21044.7 657.347   1
 -11  -1   3 20027.4 631.877   1
 -11   1   4 38270.4 900.347   1
 -11  -1   4 36456.6 888.932   1
 -11   1   5 173475. 1975.29   1
 -11  -1   5 172443. 1993.46   1
 -11  -1   6 211117. 2310.19   1
 -11   1   6 207910. 2283.13   1
 -11   1   7 152049. 2035.13   1
 -11  -1   7 153115. 2085.43   1
 -11   1   8 20186.5 797.539   1
 -11  -1   8 20536.0 802.637   1
  11   1   9 3289.83 392.775   2
 -11  -1   9 3029.05 343.256   1
 -11   1   9 3072.60 341.585   1
  11  -1   9 2621.26 355.337   2
 -11  -1   9 3519.67 404.476   2
 -11   1   9 3278.07 380.117   2
  11  -1  10 46270.8 1456.74   2
  11   1  10 47532.3 1493.17   2
 -11   1  10 47087.8 1373.50   1
 -11  -1  10 48156.1 1397.18   1
 -11  -1  10 49910.5 1439.94   2
 -11   1  10 49321.2 1424.02   2
 -11   1  11 574.895 279.276   2
 -11  -1  11 834.137 325.877   2
  11  -1  11 411.092 154.525   2
  11   1  11 361.046 240.806   2
 -11  -1  12 1860.67 375.745   2
 -11   1  12 1592.93 342.306   2
  11  -1  12 1077.69 261.761   2
  11   1  12 860.149 238.963   2
 -11  -1  13 1994.44 382.346   2
  11  -1  13 1118.73 285.118   2
  11   1  13 848.113 279.114   2
 -11   1  13 1698.76 387.589   2
  11  -1  14 73966.9 2113.21   2
  11   1  14 76083.3 2209.94   2
 -11   1  14 71540.8 1920.57   2
  11   1  15 18947.5 1127.55   2
  11  -1  15 18806.2 1082.27   2
  11  -1  16 40471.3 1551.35   2
  11   1  16 40105.6 1604.04   2
  11   1  17 11815.5 847.944   2
  11  -1  17 11413.0 798.861   2
  11  -1  18 331.423 172.773   2
  11   1  18-15.7882 207.713   2
  11   1  19-300.403 199.355   2
 -11  -3   0 451.280 152.880   1
 -11  -3   1 72705.8 1264.34   1
 -11  -3  -1 72352.5 1143.62   1
 -11  -3   2 856.785 195.503   1
 -11  -3  -2 420.013 90.2766   1
 -11  -3  -3 23582.2 595.400   1
 -11  -3   3 24128.8 786.743   1
 -11   3   4 21050.6 773.142   1
 -11  -3   4 21866.1 774.451   1
 -11   3   5 18216.8 734.677   1
 -11  -3   5 18769.8 746.163   1
 -11  -3   6 52451.9 1285.22   1
 -11   3   6 53042.8 1301.43   1
 -11   3   7 856.488 177.412   1
 -11  -3   7 984.236 218.436   1
  11  -3   8 12655.6 596.886   1
 -11  -3   8 13440.2 717.564   1
  11   3   8 13027.4 722.666   2
 -11   3   8 14322.8 740.076   2
  11   3   9 3871.08 511.013   4
  11   3   9 4702.49 477.075   2
 -11  -3   9 4035.03 428.203   1
 -11   3   9 4593.93 459.360   2
  11   3  10 10136.7 796.698   4
 -11  -3  10 9383.54 653.695   1
  11  -3  10 8651.50 609.341   2
  11   3  10 9987.11 715.632   2
 -11   3  10 9496.04 647.720   2
  11  -3  11 316.063 141.963   2
  11   3  11 500.854 229.919   2
 -11   3  11 508.337 254.272   2
 -11  -3  11-126.084 240.200   1
  11  -3  12 20895.5 1034.93   2
  11   3  12 22209.3 1144.70   2
 -11   3  12 20873.2 1027.90   2
  11  -3  13 478.251 227.170   2
  11   3  13 116.805 193.992   2
 -11   3  13 850.413 340.046   2
  11  -3  14 3187.89 433.894   2
  11   3  14 3885.84 540.415   2
 -11   3  14 4195.66 526.823   2
  11  -3  15 1664.39 321.276   2
  11   3  15 1198.78 361.745   2
  11   3  16 12794.9 937.641   2
  11   3  17 578.626 196.862   2
  11   3  18 4803.44 514.362   2
  11   3  19 2071.68 326.086   2
  11   3  20 381.683 143.075   2
 -11  -5   0 459.631 134.852   1
 -11  -5   1 97071.3 1683.39   1
 -11  -5  -1 96952.4 1538.79   1
 -11  -5  -2 3268.54 289.183   1
 -11  -5   2 3076.98 336.351   1
 -11  -5  -3 6423.14 339.146   1
 -11  -5   3 6448.29 474.738   1
 -11  -5   4 43.6631 199.917   1
 -11  -5  -4 418.231 102.572   1
 -11  -5   5 13371.4 711.307   1
 -11  -5   6 100863. 1992.39   1
 -11  -5   7 247.677 210.291   1
  11   5   8 29258.7 1188.32   4
  11   5   8 30962.1 1153.90   2
 -11  -5   8 31365.9 1225.05   1
 -11   5   8 31675.2 1135.68   2
 -11  -5   9 10478.6 746.566   1
  11  -5   9 9003.92 609.688   1
 -11   5   9 10040.4 673.213   4
  11   5   9 10835.0 717.133   2
  11   5   9 10749.0 780.392   4
 -11   5   9 11167.1 711.803   2
 -11  -5  10 182597. 3220.66   1
  11   5  10 186992. 3354.99   4
  11   5  10 183230. 3058.79   2
 -11   5  10 179926. 2795.40   2
  11   5  11 1159.21 366.487   4
 -11   5  11 1299.01 329.766   2
  11   5  11 447.059 223.533   2
 -11  -5  11 638.105 226.829   1
  11   5  12 29258.6 1487.88   4
  11   5  12 30122.9 1340.55   2
 -11   5  12 28566.5 1176.58   2
 -11   5  13 1445.14 375.623   2
  11   5  13 658.882 247.884   2
 -11   5  14 1999.55 425.461   2
  11   5  14 1371.96 369.572   2
 -11   5  15 2035.12 410.804   2
  11   5  15 2367.81 451.759   2
  11   5  16 5609.00 623.155   2
  11   5  17 184.678 256.054   2
  11   5  18 2498.68 389.802   2
  11   5  19 19319.1 941.963   2
 -11  -7   0 1390.93 265.817   1
 -11  -7   1 440511. 3990.13   1
 -11  -7  -1 441836. 3773.32   1
 -11  -7   2 6959.99 543.456   1
 -11  -7  -2 7402.55 465.933   1
 -11  -7   3 1706.44 294.927   1
 -11  -7  -3 1539.80 226.004   1
 -11  -7  -4 6670.12 372.751   1
 -11  -7   4 7369.69 583.511   1
 -11  -7   5 158310. 2642.18   1
 -11  -7   6 64024.7 1743.19   1
 -11   7   7 2511.12 350.614   2
  11   7   7 2046.17 316.479   4
 -11  -7   7 2050.15 343.393   1
  11   7   7 2284.97 336.445   2
  11   7   8 29106.6 1192.84   4
  11   7   8 31594.3 1201.37   2
 -11  -7   8 28904.0 1283.69   1
 -11   7   8 30273.5 1131.77   2
 -11   7   9 16748.8 884.706   4
  11   7   9 18373.4 1000.95   4
  11  -7   9 16360.7 954.294   1
  11   7   9 17881.8 966.975   2
 -11  -7   9 17272.8 1051.89   1
 -11   7   9 18938.8 917.305   2
 -11   7  10 171107. 2910.46   4
  11   7  10 171457. 3135.05   4
  11   7  10 176139. 3085.63   2
 -11  -7  10 165441. 3295.51   1
 -11   7  10 170806. 2784.32   2
 -11   7  11 5820.23 621.903   4
 -11  -7  11 5097.87 625.561   1
  11   7  11 5028.43 610.295   4
  11   7  11 5365.30 574.016   2
 -11   7  11 6167.83 583.223   2
  11   7  12 10337.3 884.190   4
 -11  -7  12 8626.09 805.879   1
  11   7  12 10725.0 835.994   2
 -11   7  12 10463.2 769.845   2
  11   7  13 2289.96 537.851   4
  11   7  13 2169.96 416.800   2
 -11   7  13 3287.89 508.458   2
 -11   7  14 766.833 333.300   2
  11   7  14 116.404 217.318   2
 -11   7  15 911.283 323.799   2
  11   7  15 556.678 281.765   2
  11   7  16 7809.92 734.851   2
  11   7  17 194.311 270.721   2
  11   7  18 5762.23 548.099   2
  11   7  19 11432.3 705.289   2
 -11  -9   0 1113.76 297.478   1
 -11  -9   1 156504. 2658.27   1
 -11  -9  -1 157937. 2536.67   1
 -11  -9  -2 1693.39 268.194   1
 -11  -9   2 1322.15 318.601   1
 -11  -9   3 36.3701 202.159   1
 -11  -9  -3-68.6079 163.729   1
 -11  -9   4 21.6850 206.422   1
 -11  -9   5 329.983 223.929   1
  11   9   5 651.337 210.474   4
 -11  -9   6-86.0206 240.926   1
  11   9   6 50.1672 133.466   4
 -11   9   6 239.915 168.892   2
  11   9   6 135.750 150.351   2
 -11   9   7 2426.60 341.701   2
  11   9   7 2437.05 302.476   4
 -11  -9   7 2176.63 356.168   1
 -11   9   7 2085.73 308.845   4
  11   9   7 1998.47 348.062   2
 -11   9   8 13775.6 763.950   4
  11   9   8 14724.2 839.194   4
  11   9   8 15580.8 883.646   2
 -11  -9   8 14588.9 970.901   1
 -11   9   8 15902.9 844.946   2
  11  -9   8 14398.8 947.500   1
  11   9   9 4566.15 518.150   4
  11  -9   9 3786.02 518.788   1
 -11  -9   9 3833.70 530.839   1
  11   9   9 4433.84 506.227   2
 -11   9   9 4118.12 454.581   4
 -11   9   9 4863.21 495.908   2
 -11   9  10 6515.41 611.581   4
  11   9  10 6638.42 640.757   4
  11   9  10 6902.39 646.031   2
  11  -9  10 5290.83 650.010   1
 -11  -9  10 6555.19 745.006   1
 -11   9  10 6594.75 604.382   2
 -11   9  11 1732.92 364.598   2
 -11   9  11 1431.44 355.999   4
  11   9  11 1067.15 308.640   4
  11   9  11 1345.87 298.144   2
 -11  -9  11 1718.56 403.357   1
  11   9  12 41751.5 1669.78   4
 -11   9  12 41910.4 1591.79   4
  11   9  12 43473.4 1681.74   2
 -11   9  12 40233.8 1445.77   2
  11   9  13 133.114 304.996   4
  11   9  13 17.2858 211.199   2
  11   9  14 9493.70 887.104   4
  11   9  14 9931.05 843.716   2
 -11   9  14 9758.11 743.838   2
  11   9  15 297.546 270.361   2
  11   9  16-65.7798 261.862   2
  11   9  17 2614.30 381.241   2
  11   9  18 1575.29 297.088   2
  11   9  19 4957.47 432.861   2
 -11 -11   0 148.168 243.659   1
 -11 -11  -1 2999.98 418.183   1
 -11 -11   1 3208.98 465.726   1
 -11 -11  -2 216.522 173.849   1
 -11 -11   2 205.951 211.139   1
  11  11   3 19558.9 843.026   4
 -11 -11   3 20005.5 1076.58   1
 -11 -11  -3 21934.9 1017.90   1
  11  11   4 30518.9 1097.82   4
 -11 -11   4 28940.1 1315.13   1
  11  11   5 91696.1 1950.29   4
 -11 -11   5 89568.6 2359.29   1
 -11  11   6 51872.5 1425.45   4
  11  11   6 57134.3 1589.54   4
  11  11   6 53173.2 1529.27   2
 -11 -11   6 56427.0 1904.47   1
 -11  11   7 5475.31 493.154   4
  11  11   7 5219.53 507.888   4
  11  11   7 5427.40 535.913   2
 -11 -11   7 5657.46 645.414   1
 -11  11   7 5147.94 491.625   2
  11  11   8 3468.20 423.477   4
 -11 -11   8 3127.76 519.675   1
  11 -11   8 4268.24 574.515   1
  11  11   8 3774.36 447.240   2
 -11  11   8 3835.11 436.293   4
 -11  11   8 4260.63 472.961   2
  11  11   9 1902.77 346.721   4
  11 -11   9 1855.79 415.150   1
 -11 -11   9 1531.70 376.057   1
 -11  11   9 2236.31 356.051   4
  11  11   9 1786.67 339.379   2
 -11  11   9 2846.98 396.933   2
  11  11  10 27698.0 1300.98   4
 -11  11  10 30648.3 1297.57   4
 -11 -11  10 27028.1 1549.31   1
  11  11  10 30177.8 1340.59   2
 -11  11  10 28311.7 1177.23   2
 -11  11  11 1097.83 311.369   2
 -11  11  11 889.862 301.813   4
  11  11  11 404.452 257.733   2
 -11 -11  11 361.909 279.772   1
  11  11  11 861.984 315.943   4
 -11  11  12 1125.33 314.852   2
 -11  11  12 926.170 330.278   4
  11  11  12 659.454 274.029   4
  11  11  12 777.311 337.731   2
  11  11  13 1278.13 391.213   4
  11  11  13 1455.69 380.088   2
 -11  11  13 2199.29 432.937   2
  11  11  14 28797.2 1409.21   4
  11  11  14 31902.1 1425.90   2
  11  11  15 10035.5 768.796   2
  11  11  16 33259.7 1343.26   2
  11  11  17 6052.97 549.216   2
  11  11  18 487.901 180.488   2
 -11 -13   0-36.3272 221.739   1
 -11 -13   1 28263.3 1392.64   1
 -11 -13  -1 29188.8 1385.95   1
 -11 -13  -2 560.265 253.309   1
 -11 -13   2 512.631 302.161   1
 -11 -13   3 43954.0 1762.02   1
  11  13   3 45281.8 1369.11   4
 -11  13   4 21446.8 922.741   4
  11  13   4 23165.6 1017.94   4
 -11 -13   4 23229.6 1307.84   1
 -11  13   5 80003.1 1804.79   4
  11  13   5 87969.5 2021.77   4
 -11 -13   5 85148.6 2504.90   1
 -11  13   6 44520.5 1386.51   4
  11  13   6 45749.9 1491.23   4
 -11 -13   6 44003.2 1845.91   1
  11 -13   7 16338.0 1196.84   1
 -11  13   7 16715.2 884.799   4
  11  13   7 16606.8 925.597   4
  11  13   7 14461.4 841.820   2
 -11 -13   7 15351.8 1138.05   1
 -11  13   8 4200.64 485.706   4
  11  13   8 3541.44 443.838   4
 -11 -13   8 3356.45 569.981   1
  11  13   8 3933.40 463.479   2
  11 -13   8 3632.81 587.362   1
 -11  13   9 3514.30 476.059   4
  11  13   9 3011.42 439.129   4
  11 -13   9 2910.74 560.506   1
 -11 -13   9 2678.19 519.573   1
  11  13   9 2835.73 415.781   2
 -11  13  10 654.839 248.045   4
  11  13  10 958.125 355.269   4
 -11 -13  10 476.425 274.823   1
  11  13  10 466.771 216.032   2
  11 -13  10 785.814 394.294   1
 -11  13  11 266.265 229.932   4
  11  13  11-181.382 245.554   2
  11  13  11-73.4969 209.833   4
 -11  13  12 1528.10 369.477   4
  11  13  12 1302.03 269.883   4
  11  13  12 1965.54 329.408   2
  11  13  13-170.846 255.557   4
  11  13  13-159.555 221.314   2
  11  13  14 21318.1 1190.77   4
  11  13  14 24719.9 1189.61   2
  11  13  15 10252.7 735.973   2
  11  13  16 23383.0 1037.84   2
  11  13  17 7059.68 531.159   2
 -11 -15   0 183.040 233.346   1
 -11 -15   1 174.951 267.128   1
 -11 -15  -1 65.3534 233.459   1
 -11  15   1-119.390 143.405   4
  11  15   2 708.680 210.013   4
 -11 -15   2 787.609 365.674   1
 -11  15   2 562.747 166.766   4
 -11  15   3 13736.4 777.470   4
 -11 -15   3 12544.8 1038.69   1
  11  15   3 14371.2 832.683   4
 -11 -15   4 5348.32 710.529   1
 -11  15   4 6417.24 550.964   4
  11  15   4 6528.00 587.158   4
 -11 -15   5 5631.87 724.322   1
 -11  15   5 5234.89 504.229   4
  11 -15   5 5987.71 736.231   1
  11  15   5 5692.18 560.226   4
 -11  15   6 8602.91 635.883   4
 -11 -15   6 8549.03 906.919   1
  11 -15   6 8709.10 942.166   1
  11  15   6 8478.93 679.998   4
 -11  15   7 1762.00 340.178   4
  11 -15   7 1624.46 438.062   1
 -11 -15   7 1426.55 394.837   1
  11  15   7 1517.89 313.720   4
 -11  15   8 4846.81 545.837   4
 -11 -15   8 3422.55 604.177   1
  11 -15   8 4296.80 679.707   1
  11  15   8 3929.63 510.725   4
 -11  15   9 1309.75 341.807   4
  11  15   9 601.204 236.364   4
 -11  15  10 593.137 212.944   4
  11  15  10 856.138 277.124   4
 -11  15  11 12.7802 172.447   4
  11  15  11 196.396 153.872   2
  11  15  11 44.9412 288.801   4
  11  15  12 120.587 205.473   2
 -11  15  12 106.902 187.445   4
  11  15  12 622.904 257.246   4
  11  15  13 166.600 232.710   4
  11  15  13-388.934 259.437   2
  11  15  14 2313.43 389.164   4
  11  15  14 2164.33 343.322   2
  11  15  15 1327.76 249.867   2
 -11 -17   0-42.1003 283.494   1
 -11  17   0-14.1069 140.218   4
 -11  17   1 30960.8 1181.90   4
 -11  17  -1 30670.5 1146.49   4
  11  17   1 32510.8 1260.81   4
 -11 -17   2 838.054 331.254   1
 -11  17   2 663.303 179.051   4
  11  17   2 951.912 323.718   4
  11 -17   2 243.828 365.165   1
 -11 -17   3 22.2580 290.890   1
 -11  17   3 0.44402 202.819   4
  11  17   3 43.3173 196.519   4
  11 -17   3-471.771 364.411   1
 -11 -17   4 609.427 333.252   1
  11 -17   4 404.793 296.515   1
  11  17   4 620.851 232.136   4
 -11  17   4 596.188 197.410   4
 -11  17   5 1507.13 277.898   4
  11  17   5 1652.82 320.382   4
 -11  17   6 1646.96 313.107   4
  11  17   6 1563.60 338.261   4
 -11  17   7 3126.10 437.887   4
  11  17   7 3514.08 481.546   4
 -11  17   8 32331.3 1283.97   4
  11  17   8 32537.4 1375.05   4
 -11  17   9 3220.08 442.530   4
  11  17   9 3144.11 442.378   4
  11  17  10 20670.0 1088.58   4
 -11  17  10 19891.3 1020.63   4
 -11  17  11 324.605 227.660   4
  11  17  11-82.9541 218.495   4
 -11  17  12 2306.52 367.018   4
  11  17  12 1504.21 301.298   4
  11  17  13-152.836 194.390   4
  11  17  14-160.584 191.447   4
  11  19   0 1726.26 430.092   4
  11  19   1 58173.4 1732.49   4
  11  19   2 566.971 238.705   4
  11  19   3-174.262 274.775   4
  11  19   4 2740.61 412.818   4
  11  19   5 11439.3 792.223   4
  11  19   6 2232.80 415.145   4
  11  19   7 1347.52 325.161   4
  11  19   8 10006.8 745.888   4
  11  19   9 4767.93 529.179   4
  11  19  10 35487.1 1336.37   4
  11  19  11 311.112 208.495   4
  11  19  12 8054.61 616.233   4
  11  19  13 1.83806 132.240   4
  11  21   0 209.560 214.900   4
  11  21   1 12608.3 836.569   4
  11  21  -1 12906.7 823.418   4
  11  21   2 364.528 183.136   4
  11  21  -2 732.775 293.165   4
  11  21   3 409.720 199.609   4
  11  21   4 91.7505 170.571   4
  11  21   5 712.684 250.123   4
  11  21   6 500.241 163.188   4
  11  21   7-67.3927 197.519   4
  11  21   8 1641.88 284.727   4
  11  21   9 556.458 205.224   4
  11  21  10 6842.14 540.407   4
  11  21  11 324.540 167.450   4
  11  23   0-374.642 225.856   4
  11  23   1 238.026 180.945   4
  11  23  -1 262.651 174.654   4
  11  23   2-53.9523 151.886   4
  11  23  -2 61.7970 166.461   4
  11  23  -3 5276.72 517.204   4
  11  23   3 4487.82 459.344   4
  11  23   4 4210.27 445.709   4
  11  23  -4 5137.61 502.265   4
  11  23  -5 13494.8 779.244   4
  11  23   5 10638.2 678.984   4
  11  23   6 5098.95 456.981   4
  11  23  -6 6209.30 513.041   4
  11  23   7 654.840 177.164   4
  11  23  -7 743.804 194.384   4
  11  23   8 12.0202 141.272   4
  11  25   0-39.5338 139.295   4
  11  25   1 787.745 199.102   4
  11  25  -1 565.017 141.430   4
  11  25   2-52.0585 122.572   4
  11  25  -2-154.531 127.384   4
  11  25   3 4053.24 380.974   4
  11  25  -3 4225.17 389.573   4
 -12   0   0 375698. 2711.07   1
 -12   0   1 4114.11 304.458   1
 -12   0  -1 3915.50 288.618   1
 -12   0   2 4521.78 319.283   1
 -12   0   3 50987.7 1043.90   1
 -12   0   4 56785.5 1125.37   1
 -12   0   5 156760. 1931.28   1
 -12   0   6 172001. 2110.91   1
 -12   0   7 296683. 2931.56   1
 -12   0   8 165.372 124.813   1
 -12   0   9 149624. 2354.17   1
  12   0   9 149375. 2575.44   2
 -12   0  10 2253.92 324.438   1
  12   0  10 2208.37 358.318   2
 -12   0  10 2733.73 410.281   2
  12   0  11 33870.9 1329.50   2
 -12   0  11 34228.5 1239.28   2
 -12   0  12 1904.74 354.827   2
  12   0  12 841.995 219.256   2
  12   0  13-251.676 250.844   2
 -12   0  13 1179.97 360.177   2
  12   0  14 9035.63 765.353   2
  12   0  15 49242.8 1773.78   2
  12   0  16 25251.1 1245.52   2
  12   0  17 7606.59 669.637   2
  12   0  18 1373.45 276.920   2
  12   0  19 19.4046 127.188   2
 -12  -2   0 58845.4 1068.95   1
 -12  -2   1 7341.63 396.843   1
 -12  -2  -1 8249.88 400.150   1
 -12  -2   2 1562.00 194.718   1
 -12  -2  -2 2027.71 205.463   1
 -12   2   2 1847.84 220.410   1
 -12  -2   3 1586.51 221.331   1
 -12   2   3 1726.78 228.323   1
 -12  -2  -3 1673.45 169.840   1
 -12  -2   4 71018.3 1342.59   1
 -12   2   4 69551.8 1327.58   1
 -12  -2   5 33091.5 951.577   1
 -12   2   5 33003.5 930.737   1
 -12  -2   6 165528. 2200.78   1
 -12   2   6 162162. 2139.88   1
 -12  -2   7 42160.1 1153.81   1
 -12   2   7 43426.5 1162.48   1
 -12   2   8 2382.60 332.229   2
 -12   2   8 1878.31 267.139   1
 -12  -2   8 1951.06 265.284   1
  12   2   8 2171.70 325.570   2
 -12   2   9 773.481 247.768   2
  12   2   9 702.559 255.415   4
  12   2   9 295.773 166.359   2
 -12   2   9 387.361 134.545   1
 -12  -2   9 341.586 117.500   1
  12  -2   9 392.701 191.266   2
  12  -2  10 9621.77 686.310   2
  12   2  10 10806.9 751.802   2
 -12  -2  10 10195.3 679.047   1
 -12   2  10 9955.53 684.984   1
 -12   2  10 10561.1 678.153   2
 -12   2  11 1564.27 322.103   2
  12  -2  11 1092.38 258.134   2
 -12  -2  11 1333.68 287.221   1
  12   2  11 1182.71 295.592   2
  12  -2  12 52.9262 176.151   2
  12   2  12-56.2063 257.070   2
  12   2  13 7620.93 704.524   2
  12  -2  13 6963.29 639.868   2
 -12   2  13 8031.20 668.711   2
 -12   2  14 864.245 346.272   2
  12  -2  14 251.545 212.051   2
  12   2  14 239.716 221.851   2
  12  -2  15 31712.9 1362.11   2
  12   2  15 33046.0 1492.20   2
  12   2  16 4768.77 599.583   2
  12  -2  16 4126.83 464.276   2
  12  -2  17 1787.08 303.899   2
  12   2  17 1602.52 313.014   2
  12   2  18 2136.33 348.989   2
  12   2  19-116.861 173.248   2
 -12  -4   0 94329.3 1522.77   1
 -12  -4  -1 10786.9 495.522   1
 -12  -4   1 11439.4 565.834   1
 -12  -4  -2 373.740 83.0647   1
 -12  -4   2 1113.49 242.720   1
 -12  -4  -3 140.086 99.5834   1
 -12  -4   3 472.717 213.528   1
 -12  -4   4 269.542 216.114   1
 -12  -4  -4-53.3756 80.3058   1
 -12  -4   5 6592.45 486.512   1
 -12  -4   6 81306.7 1719.27   1
 -12  -4   7 15443.1 798.165   1
 -12  -4   8 6381.90 549.491   1
  12   4   8 6658.19 542.606   2
 -12   4   8 7716.61 543.648   2
  12   4   9 66269.5 1973.62   4
 -12  -4   9 69287.2 1820.53   1
  12   4   9 66574.6 1765.41   2
 -12   4   9 70676.2 1694.10   2
  12   4  10 11293.9 865.192   4
 -12  -4  10 9508.38 705.151   1
  12   4  10 10651.8 745.069   2
 -12   4  10 10690.1 710.145   2
  12   4  11 24945.0 1358.08   4
  12   4  11 22623.9 1150.92   2
 -12  -4  11 21235.9 1086.62   1
 -12   4  11 24440.5 1052.49   2
 -12   4  12 1325.32 346.767   2
  12   4  12 379.855 229.821   2
  12   4  13 4334.29 564.284   2
 -12   4  13 4496.03 546.313   2
 -12   4  14 1810.51 429.191   2
  12   4  14 1047.62 279.572   2
  12   4  15 5707.04 659.254   2
  12   4  16 1244.19 353.517   2
  12   4  17-463.780 350.428   2
  12   4  18 939.818 217.236   2
  12   4  19 1011.14 250.141   2
 -12  -6   0 369508. 3405.53   1
 -12  -6   1 1770.08 242.721   1
 -12  -6  -1 2181.93 303.940   1
 -12  -6   2 38288.2 1171.38   1
 -12  -6  -2 38396.7 993.465   1
 -12  -6  -3 362.167 118.980   1
 -12  -6   3 64.6968 202.877   1
 -12  -6  -4 14628.6 519.426   1
 -12  -6   4 15710.1 785.999   1
 -12  -6   5 76615.2 1775.48   1
 -12  -6   6 84687.8 1940.74   1
  12   6   7 13262.7 739.696   2
 -12  -6   7 13509.9 825.855   1
 -12   6   7 13789.6 721.896   2
 -12   6   8 645.999 243.908   2
 -12   6   8 541.367 200.372   4
 -12  -6   8 946.367 298.085   1
  12   6   8 832.844 271.340   4
  12   6   8 656.670 225.841   2
 -12   6   9 76971.3 1859.13   4
  12   6   9 91774.3 2281.30   4
  12  -6   9 77986.6 1951.51   1
  12   6   9 83368.9 2026.81   2
 -12   6   9 91802.6 1964.13   2
 -12  -6   9 87903.7 2239.08   1
 -12   6  10 3416.50 481.626   4
 -12  -6  10 3503.28 514.169   1
  12   6  10 3232.59 493.812   4
  12   6  10 3489.04 494.561   2
 -12   6  10 3406.37 449.806   2
  12   6  11 90202.0 2485.25   4
 -12  -6  11 84949.9 2386.93   1
  12   6  11 91893.6 2306.79   2
 -12   6  11 83861.9 1982.22   2
 -12   6  12 1954.17 410.166   2
  12   6  12 1352.45 396.317   4
 -12  -6  12 268.172 156.794   1
  12   6  12 931.029 281.417   2
  12   6  13 21.7953 203.420   2
 -12   6  13 635.717 337.626   2
  12   6  14 3645.12 501.616   2
 -12   6  14 3815.15 540.585   2
  12   6  15 22893.6 1245.28   2
  12   6  16 9664.04 822.999   2
  12   6  17-394.149 323.540   2
  12   6  18 2239.15 339.897   2
  12   6  19 3632.67 405.774   2
 -12  -8   0 474009. 4362.10   1
 -12  -8  -1 5947.06 491.215   1
 -12  -8   1 5979.95 525.250   1
 -12  -8   2 55438.5 1548.21   1
 -12  -8  -2 56091.0 1381.69   1
 -12  -8   3 680.218 261.864   1
 -12  -8  -3 749.092 194.597   1
 -12  -8   4 123059. 2392.31   1
 -12  -8   5 42520.1 1451.73   1
  12   8   6 34631.9 1175.86   4
 -12  -8   6 36251.2 1373.75   1
  12   8   6 34519.8 1199.52   2
  12   8   7 13559.8 790.622   2
 -12  -8   7 12230.5 833.317   1
  12   8   7 13291.1 764.699   4
 -12   8   7 13771.4 749.839   2
 -12   8   8 6323.68 534.066   4
  12   8   8 7415.64 626.966   4
  12   8   8 8048.23 637.617   2
 -12  -8   8 8009.40 716.148   1
 -12   8   8 9026.72 630.427   2
 -12   8   9 61688.9 1688.43   4
  12   8   9 68101.8 1902.87   4
  12  -8   9 63060.6 1985.60   1
  12   8   9 69464.5 1904.00   2
 -12  -8   9 65890.1 2090.82   1
 -12   8   9 68293.0 1739.07   2
 -12   8  10 6238.77 591.392   4
  12   8  10 5689.58 620.838   4
  12   8  10 6732.43 639.645   2
 -12  -8  10 6230.93 698.435   1
 -12   8  10 6967.31 613.607   2
  12   8  11 16464.4 1055.36   4
  12   8  11 17698.7 1034.60   2
 -12  -8  11 15882.2 1115.37   1
 -12   8  11 18493.4 1015.11   4
 -12   8  11 17486.0 940.034   2
 -12  -8  12 64.6454 208.190   1
  12   8  12 262.438 302.979   4
  12   8  12-267.844 312.522   2
  12   8  13 3365.27 581.584   4
  12   8  13 3081.02 469.857   2
 -12   8  13 4455.20 537.176   2
  12   8  14 975.185 325.756   2
 -12   8  14 1458.67 384.187   2
  12   8  15 4672.74 577.234   2
  12   8  16 1585.01 383.426   2
  12   8  17 142.775 239.933   2
  12   8  18 481.285 160.376   2
  12   8  19 2677.18 337.840   2
 -12 -10   0 4231.83 489.439   1
 -12 -10   1 475.970 219.808   1
 -12 -10  -1 467.498 209.490   1
 -12 -10   2 877.017 283.767   1
 -12 -10  -2 851.235 216.290   1
 -12 -10   3 1303.95 330.542   1
  12  10   3 799.244 183.769   4
 -12 -10  -3 677.563 183.201   1
 -12 -10   4 24749.9 1185.86   1
  12  10   4 24465.1 961.504   4
  12  10   5 6228.14 503.096   4
 -12 -10   5 5617.05 587.200   1
  12  10   5 4582.09 440.212   2
  12  10   6 12039.0 726.595   4
 -12 -10   6 9979.93 790.469   1
  12  10   6 9834.47 670.442   2
 -12  10   7 6654.22 509.202   4
  12  10   7 7483.23 610.144   2
 -12 -10   7 7483.96 687.692   1
  12  10   7 7097.70 558.699   4
 -12  10   7 8535.31 607.234   2
 -12  10   8-152.575 177.407   4
  12 -10   8-516.416 301.614   1
 -12 -10   8-70.8292 260.349   1
  12  10   8 222.891 175.679   4
  12  10   8-47.0171 209.760   2
 -12  10   9 9000.06 674.019   4
  12  10   9 9910.26 745.197   4
  12 -10   9 8621.92 819.730   1
  12  10   9 10724.5 785.300   2
 -12 -10   9 9217.51 834.486   1
 -12  10   9 10288.9 704.130   2
 -12  10  10 2721.98 413.436   2
 -12  10  10 2519.46 407.601   4
  12 -10  10 1573.48 378.952   1
 -12 -10  10 1783.83 438.010   1
  12  10  10 2250.66 428.474   4
  12  10  10 1983.43 359.170   2
 -12  10  11 2804.65 445.610   4
  12  10  11 2058.76 431.911   4
  12  10  11 2409.00 418.628   2
 -12 -10  11 2324.08 489.432   1
 -12  10  11 3088.70 459.409   2
 -12  10  12 497.812 277.566   2
  12  10  12 56.5202 247.203   4
  12  10  12 65.0736 229.918   2
 -12 -10  12 337.969 273.573   1
  12  10  13 10224.1 865.140   4
  12  10  13 11130.5 871.574   2
  12  10  14 787.457 348.146   4
  12  10  14 480.760 306.302   2
  12  10  15 14750.0 974.475   2
  12  10  16 2912.08 394.285   2
  12  10  17 2688.56 369.486   2
  12  10  18 431.629 171.274   2
 -12 -12   0 83013.1 2241.69   1
 -12 -12   1 2312.68 428.092   1
 -12 -12  -1 2518.70 412.705   1
 -12 -12   2 406.233 214.164   1
 -12 -12  -2 389.790 210.272   1
  12  12   3 9890.04 631.206   4
 -12 -12   3 10282.6 838.764   1
  12  12   4 79750.6 1852.29   4
 -12 -12   4 74732.7 2230.87   1
  12  12   5 66795.9 1715.20   4
 -12 -12   5 63630.7 2099.78   1
 -12  12   6 29680.8 1105.72   4
  12  12   6 30147.4 1174.55   2
 -12 -12   6 32496.6 1523.23   1
  12 -12   7 19364.2 1229.51   1
 -12  12   7 17475.5 884.871   4
  12  12   7 17423.8 936.753   4
  12  12   7 19243.6 983.986   2
 -12 -12   7 17050.3 1141.40   1
 -12  12   8 2621.89 390.700   4
  12 -12   8 2037.98 430.824   1
 -12 -12   8 2150.84 433.205   1
  12  12   8 1915.55 333.792   2
  12  12   8 2110.09 339.794   4
 -12  12   9 51323.2 1617.98   4
  12  12   9 46864.7 1649.19   4
  12 -12   9 44241.8 2011.68   1
  12  12   9 53354.4 1745.52   2
 -12 -12   9 45850.9 1995.83   1
 -12  12  10 72.3709 191.687   4
  12  12  10 221.610 228.312   4
  12 -12  10-107.023 215.890   1
 -12 -12  10 395.980 318.072   1
  12  12  10-155.209 244.138   2
 -12  12  11 5795.14 592.301   4
  12  12  11 5329.23 604.396   4
  12  12  11 5364.98 589.709   2
 -12  12  12 809.793 287.868   4
  12  12  12 788.626 212.912   4
  12  12  12 688.761 266.336   2
  12  12  13 3959.96 571.408   4
  12  12  13 4023.67 535.590   2
  12  12  14 2885.09 508.686   4
  12  12  14 3453.17 499.808   2
  12  12  15 24389.7 1172.29   2
  12  12  16 10066.4 713.793   2
  12  12  17 5136.53 471.992   2
 -12 -14   0 38784.4 1695.48   1
 -12 -14   1 103.040 215.708   1
 -12 -14  -1-52.3255 230.649   1
 -12 -14   2 141.976 250.058   1
  12  14   2 390.078 148.744   4
 -12 -14   3 2066.20 455.276   1
  12  14   3 2449.66 347.712   4
  12  14   4 32619.6 1249.64   4
 -12 -14   4 28838.3 1513.53   1
  12  14   5 15379.9 900.635   4
 -12 -14   5 13530.1 1072.54   1
 -12  14   6 16761.9 868.694   4
  12  14   6 17799.3 987.649   4
  12 -14   6 17017.3 1241.62   1
 -12 -14   6 15840.7 1174.67   1
 -12  14   7 1524.25 315.292   4
  12 -14   7 552.958 246.691   1
  12  14   7 905.252 230.637   4
 -12 -14   7 1616.11 386.962   1
 -12  14   8 806.471 259.737   4
  12  14   8 145.133 204.783   4
  12 -14   8-63.2698 231.643   1
 -12 -14   8 428.654 331.922   1
  12  14   9 135.368 198.201   4
  12 -14   9 396.410 317.311   1
  12  14   9 277.216 177.751   2
 -12  14   9 447.817 215.569   4
 -12  14  10 567.874 271.894   4
  12  14  10 635.049 265.551   4
  12  14  10 239.661 170.093   2
 -12  14  11 2696.78 408.731   4
  12  14  11 2823.36 427.210   2
  12  14  11 2422.91 422.613   4
 -12  14  12 439.528 271.049   4
  12  14  12 284.357 193.646   4
  12  14  12-64.6526 175.268   2
  12  14  13 819.153 251.493   4
  12  14  13 822.512 254.980   2
  12  14  14 733.295 262.317   4
  12  14  14 18.7581 199.196   2
  12  14  15 16770.1 887.704   2
  12  14  16 2705.56 344.367   2
 -12 -16   0 3642.21 609.233   1
 -12 -16   1 69.0469 268.174   1
  12  16   1 540.890 225.862   4
 -12 -16   2 269.889 331.203   1
  12  16   2 831.955 283.017   4
 -12 -16   3 253.520 262.247   1
  12  16   3 67.7000 184.910   4
 -12 -16   4 802.799 361.842   1
  12  16   4 980.694 262.766   4
  12 -16   4 461.757 296.856   1
 -12 -16   5 13.8649 265.582   1
  12  16   5 322.386 207.036   4
  12 -16   5-25.0156 291.437   1
  12  16   6 103.459 203.772   4
  12 -16   6 293.018 281.472   1
 -12 -16   6 386.222 306.869   1
 -12  16   7 3511.84 438.760   4
  12  16   7 3028.98 454.705   4
 -12  16   8 6628.28 589.953   4
  12  16   8 6346.87 624.794   4
 -12  16   9 4497.37 497.780   4
  12  16   9 4557.49 545.551   4
  12  16  10 67.1514 241.357   4
 -12  16  10 458.317 239.577   4
 -12  16  11 2455.88 400.770   4
  12  16  11 1658.81 281.117   4
  12  16  12 71.3478 231.530   4
  12  16  13-144.183 256.273   4
  12  16  14-510.465 236.961   4
  12  18   0 62630.8 1789.34   4
  12  18   1 849.544 341.522   4
  12  18   2 9860.86 737.481   4
  12  18   3-126.293 245.423   4
  12  18   4 13554.1 873.434   4
  12  18   5 12059.4 828.901   4
  12  18   6 3644.58 505.556   4
  12  18   7 1887.10 393.998   4
  12  18   8 2111.52 395.081   4
  12  18   9 24243.3 1165.91   4
  12  18  10 926.143 283.552   4
  12  18  11 13171.6 843.117   4
  12  18  12 99.9007 163.140   4
  12  18  13-85.5661 141.095   4
  12  20   0 39450.1 1451.29   4
  12  20   1 528.774 250.409   4
  12  20  -1 343.715 195.880   4
  12  20   2 3104.89 427.288   4
  12  20   3 17.8536 212.705   4
  12  20   4 7310.67 641.481   4
  12  20   5 2314.01 378.353   4
  12  20   6 585.058 227.690   4
  12  20   7 660.546 239.128   4
  12  20   8 831.107 257.067   4
  12  20   9 13388.4 806.155   4
  12  20  10 406.927 170.781   4
  12  20  11 9049.32 628.135   4
  12  20  12 94.1456 127.844   4
  12  22   0-187.111 186.154   4
  12  22   1 12.4702 162.709   4
  12  22  -1-28.7888 171.731   4
  12  22   2 267.333 206.660   4
  12  22  -2 183.751 190.461   4
  12  22   3 134.673 153.083   4
  12  22  -3 351.224 194.880   4
  12  22   4 5304.25 519.118   4
  12  22  -4 6998.47 601.715   4
  12  22   5 2370.92 346.744   4
  12  22   6 344.220 212.510   4
  12  22   7 24.6579 140.413   4
  12  22   8-66.6282 172.866   4
  12  22   9-107.135 142.911   4
  12  24   0 4531.06 443.263   4
  12  24   1 92.8940 126.783   4
  12  24  -1 121.693 134.731   4
  12  24  -2-37.0343 152.625   4
  12  24   2-209.113 154.573   4
  12  24   3 706.387 209.316   4
  12  24  -3 611.511 212.740   4
  12  24   4 6155.70 495.507   4
  12  24  -4 7721.68 558.597   4
  12  24   5 3205.99 354.227   4
  12  24  -5 3870.32 394.777   4
  12  24   6 2908.06 319.224   4
  12  24  -6 3056.50 335.625   4
 -13  -1   0 2002.80 240.988   1
 -13   1   0 1289.41 191.280   1
 -13  -1  -1 207173. 2061.34   1
 -13  -1   1 208101. 2102.69   1
 -13   1   1 204345. 2188.83   1
 -13  -1  -2 940.479 148.312   1
 -13   1   2 1131.48 174.360   1
 -13  -1   2 781.761 109.162   1
 -13   1   3 23931.3 759.783   1
 -13  -1   3 23980.8 741.383   1
 -13   1   4 12066.3 549.005   1
 -13  -1   4 11555.3 523.600   1
 -13   1   5 116499. 1745.33   1
 -13  -1   5 119296. 1753.99   1
 -13   1   6 247288. 2628.13   1
 -13  -1   6 237966. 2610.01   1
 -13  -1   7 45699.5 1199.06   1
 -13   1   7 45459.7 1185.65   1
 -13   1   8 3545.60 358.996   1
 -13  -1   8 4846.11 428.203   1
  13   1   8 4066.01 427.397   2
 -13   1   9 15647.6 789.150   1
  13  -1   9 16516.9 864.015   2
  13   1   9 17179.7 889.306   2
 -13  -1   9 16697.4 822.568   1
 -13   1   9 18769.3 865.902   2
  13  -1  10 98434.6 2171.32   2
  13   1  10 99960.4 2220.91   2
 -13   1  10 97480.8 2099.64   1
 -13   1  10 99458.8 2036.02   2
 -13  -1  10 98456.1 2102.87   1
 -13  -1  11 1721.94 290.588   1
  13  -1  11 1900.75 367.263   2
  13   1  11 2195.22 370.114   2
 -13   1  11 2567.87 422.715   2
  13  -1  12 6757.57 616.246   2
  13   1  12 7872.78 680.618   2
 -13   1  12 7938.75 661.173   2
  13  -1  13 321.220 177.077   2
  13   1  13 332.640 192.369   2
  13  -1  14 9773.54 783.547   2
  13   1  14 9019.97 765.623   2
  13   1  15 8217.85 761.883   2
  13  -1  15 8256.68 731.408   2
  13  -1  16 27217.2 1257.79   2
  13   1  16 28782.5 1358.75   2
  13   1  17 2108.53 366.048   2
  13  -1  17 2290.82 375.147   2
  13  -1  18 348.607 185.123   2
  13   1  18-199.560 259.884   2
  13   1  19 3238.85 391.438   2
 -13  -3   0-40.0182 138.851   1
 -13  -3   1 339.643 143.627   1
 -13  -3  -1-79.7374 149.762   1
 -13  -3   2 4616.24 359.528   1
 -13  -3  -2 4958.06 327.386   1
 -13  -3  -3 912.743 155.766   1
 -13  -3   3 980.940 211.746   1
 -13  -3   4 114.750 125.147   1
 -13   3   5-162.401 195.453   1
 -13  -3   5 70.9301 125.192   1
 -13  -3   6 43704.5 1214.35   1
 -13   3   6 43334.8 1251.50   1
 -13  -3   7 1098.44 231.056   1
 -13   3   7 1153.70 227.380   1
 -13  -3   8 6400.07 509.644   1
  13   3   8 7137.80 561.737   2
 -13   3   8 7753.47 554.707   2
  13   3   9 4846.95 573.849   4
 -13  -3   9 4342.50 442.122   1
  13  -3   9 4354.76 441.221   2
  13   3   9 5439.64 520.091   2
 -13   3   9 5564.43 499.836   2
 -13   3  10 2232.98 355.763   2
  13   3  10 2571.07 521.128   4
 -13  -3  10 1016.68 206.937   1
  13  -3  10 1393.22 284.975   2
  13   3  10 1603.67 347.912   2
 -13   3  11 711.619 278.371   2
 -13  -3  11 474.470 221.210   1
  13  -3  11-239.418 212.852   2
  13   3  11 377.669 228.755   2
 -13   3  12 447.187 261.542   2
  13  -3  12-310.435 205.970   2
  13   3  12-257.587 291.231   2
  13  -3  13 383.269 168.746   2
  13   3  13 252.997 241.023   2
  13  -3  14 6.79690 167.032   2
  13   3  14-149.228 218.153   2
  13   3  15 156.322 199.469   2
  13  -3  15 189.018 216.250   2
  13   3  16 774.123 302.765   2
  13   3  17-154.912 236.272   2
  13   3  18-229.108 249.431   2
  13   3  19-61.9626 190.952   2
 -13  -5   0 1419.38 258.797   1
 -13  -5  -1 139068. 1919.09   1
 -13  -5   1 138132. 2081.07   1
 -13  -5  -2 1476.77 200.424   1
 -13  -5   2 2020.52 304.537   1
 -13  -5  -3 14848.1 557.668   1
 -13  -5   3 16145.9 763.756   1
 -13  -5  -4 3115.90 245.231   1
 -13  -5   4 3608.01 411.019   1
 -13  -5   5 193349. 2715.21   1
 -13  -5   6 104876. 2079.53   1
  13   5   7 14742.5 784.264   2
 -13   5   7 15426.5 776.292   2
 -13  -5   7 15168.6 833.959   1
  13   5   8 2687.95 408.674   4
 -13  -5   8 2862.26 405.923   1
 -13   5   8 3151.79 389.738   2
  13   5   8 2979.87 377.186   2
  13   5   9 6912.30 656.564   4
 -13  -5   9 6293.41 586.248   1
  13   5   9 6274.11 568.411   2
 -13   5   9 6532.98 564.402   2
 -13  -5  10 57987.7 1837.73   1
  13   5  10 59403.8 1776.36   2
 -13   5  10 59959.6 1625.33   2
  13   5  11 2236.91 496.286   4
 -13   5  11 2352.45 405.155   2
 -13  -5  11 1163.52 275.280   1
  13   5  11 1610.37 346.467   2
  13   5  12 1052.65 519.175   4
 -13   5  12 1195.85 345.619   2
  13   5  12-10.3150 281.420   2
 -13  -5  12 86.3591 215.212   1
 -13   5  13 1133.42 363.711   2
  13   5  13-142.531 270.716   2
  13   5  14 19006.2 1147.42   2
 -13   5  14 17644.2 1006.11   2
  13   5  15 5809.66 630.150   2
  13   5  16 21417.6 1193.29   2
  13   5  17 2738.22 439.694   2
  13   5  18 583.237 172.085   2
  13   5  19 1666.31 272.239   2
 -13  -7   0 1339.52 258.284   1
 -13  -7   1 181803. 2685.27   1
 -13  -7  -1 183698. 2493.89   1
 -13  -7   2 7113.07 542.365   1
 -13  -7  -2 6389.88 460.767   1
 -13  -7  -3 42014.1 1069.01   1
 -13  -7   3 41957.5 1323.42   1
 -13  -7  -4 107599. 1556.49   1
 -13  -7   4 112969. 2238.04   1
 -13  -7   5 96008.7 2110.50   1
 -13  -7   6 72018.2 1887.11   1
  13   7   6 70627.2 1700.41   2
  13   7   7 11525.3 728.733   4
  13   7   7 11438.0 718.466   2
 -13  -7   7 11591.7 809.621   1
 -13   7   7 12382.3 703.597   2
 -13   7   8 4697.17 469.756   4
  13   7   8 6392.70 598.556   4
  13   7   8 5439.93 530.358   2
 -13  -7   8 5665.93 596.552   1
 -13   7   8 6134.84 523.412   2
 -13   7   9 4330.54 467.291   4
  13   7   9 5310.89 584.268   4
  13  -7   9 3641.65 457.780   1
  13   7   9 4826.30 530.463   2
 -13   7   9 5494.93 526.053   2
 -13  -7   9 4970.22 585.574   1
  13   7  10 67555.8 2083.78   4
 -13  -7  10 64487.0 2090.06   1
 -13   7  10 63055.5 1771.01   4
  13   7  10 68313.2 1940.33   2
 -13   7  10 64011.1 1720.90   2
 -13   7  11 764.721 333.690   2
 -13  -7  11-10.3217 182.557   1
  13   7  11 257.114 268.537   4
  13   7  11-32.8093 212.786   2
 -13  -7  12 6933.97 718.125   1
  13   7  12 9032.54 761.252   2
  13   7  12 7873.07 832.121   4
 -13   7  12 9744.21 726.128   2
 -13   7  13 1954.84 424.171   2
  13   7  13 1184.40 441.647   4
  13   7  13 1033.88 286.450   2
  13   7  14 19209.3 1136.61   2
  13   7  15 12482.5 921.113   2
  13   7  16 16424.4 1018.31   2
  13   7  17 127.139 242.810   2
  13   7  18-190.155 238.790   2
  13   7  19 4809.14 451.919   2
 -13  -9   0 705.424 207.625   1
 -13  -9   1 83789.0 1995.60   1
 -13  -9  -1 83086.7 1884.29   1
 -13  -9   2-34.4955 211.544   1
 -13  -9  -2-11.5135 128.465   1
 -13  -9   3 13814.4 850.507   1
 -13  -9  -3 14884.1 734.597   1
 -13  -9   4 2366.12 385.523   1
  13   9   5 17681.8 841.063   4
 -13  -9   5 18621.1 1016.64   1
  13   9   5 15823.0 804.635   2
  13   9   6 5476.43 494.891   4
 -13  -9   6 4822.73 516.111   1
  13   9   6 5230.70 491.854   2
  13   9   7 4221.54 438.497   4
  13   9   7 4314.68 462.486   2
 -13  -9   7 4067.71 498.115   1
 -13   9   7 4967.95 488.883   2
 -13   9   8-21.2592 160.931   4
  13   9   8 23.3576 186.605   4
 -13  -9   8 325.487 288.733   1
  13   9   8 131.672 149.790   2
 -13   9   9 1494.29 341.773   2
 -13   9   9 1011.42 253.420   4
  13   9   9 980.355 296.964   4
  13  -9   9 583.186 195.048   1
 -13  -9   9 1282.51 426.911   1
  13   9   9 983.281 294.698   2
 -13   9  10-65.9137 184.590   4
  13   9  10 137.898 236.444   4
 -13  -9  10 389.927 263.826   1
  13   9  10 467.534 213.161   2
 -13   9  11 835.346 339.232   2
 -13   9  11 743.709 317.046   4
  13   9  11 183.359 229.081   4
  13   9  11 28.9595 210.288   2
 -13  -9  11 7.02092 223.650   1
  13   9  12 2326.85 459.343   4
 -13  -9  12 1499.37 373.344   1
  13   9  12 1675.33 354.001   2
 -13   9  12 2878.08 472.209   2
  13   9  13 699.868 317.698   4
  13   9  13 530.414 221.023   2
  13   9  14 506.247 246.472   2
  13   9  15 474.110 298.104   2
  13   9  16 593.627 271.822   2
  13   9  17 487.665 153.177   2
  13   9  18-311.117 208.487   2
 -13 -11   0 421.746 227.061   1
 -13 -11   1 46573.5 1644.83   1
 -13 -11  -1 49029.0 1623.25   1
 -13 -11   2 385.309 199.899   1
 -13 -11  -2 313.848 164.014   1
 -13 -11   3 7101.02 681.397   1
  13  11   3 7494.14 544.699   4
  13  11   4 16318.0 831.974   4
 -13 -11   4 16059.9 1010.98   1
 -13 -11   5 40468.2 1601.10   1
  13  11   5 41523.9 1355.12   4
  13  11   6 10344.9 691.711   4
  13  11   6 9579.54 685.406   2
 -13 -11   6 9234.17 791.792   1
  13  11   7 6820.64 571.741   4
  13  11   7 7100.06 621.105   2
 -13 -11   7 6417.10 671.666   1
  13 -11   8 8901.83 840.447   1
  13  11   8 8710.53 671.738   4
  13  11   8 9467.14 709.966   2
 -13  11   8 7562.43 600.032   4
 -13 -11   8 7400.03 754.986   1
 -13  11   9 7355.81 628.030   4
  13  11   9 7946.22 704.044   4
  13 -11   9 7416.25 816.111   1
  13  11   9 8878.41 723.320   2
 -13 -11   9 8049.46 846.611   1
 -13  11  10 21215.0 1063.56   4
  13  11  10 21309.3 1164.54   4
  13  11  10 22948.6 1182.38   2
 -13 -11  10 20286.5 1352.72   1
 -13  11  11 1131.88 329.802   4
  13  11  11 746.780 312.043   4
  13  11  11 320.398 198.710   2
 -13 -11  11 324.222 335.028   1
  13  11  12 695.745 226.680   4
  13  11  12 890.645 321.595   2
  13  11  13 160.469 248.384   4
  13  11  13-325.074 254.517   2
  13  11  14 18461.4 1146.34   4
  13  11  14 20069.9 1125.30   2
  13  11  15 6654.00 649.553   2
  13  11  16 6168.05 570.294   2
  13  11  17 1648.45 287.729   2
  13  11  18-5.45330 109.796   2
 -13 -13   0 973.592 361.539   1
 -13 -13   1 44901.6 1781.43   1
 -13 -13  -1 49609.3 1837.84   1
 -13 -13   2-96.8067 233.237   1
  13  13   2-310.875 234.808   4
  13  13   3 15544.7 821.756   4
 -13 -13   3 15482.1 1057.35   1
 -13 -13   4 13628.0 1005.10   1
  13  13   4 15487.9 849.504   4
  13  13   5 39254.6 1388.26   4
 -13 -13   5 38056.6 1688.59   1
  13  13   6 31604.5 1268.51   4
 -13 -13   6 28539.1 1506.95   1
  13 -13   7-320.821 301.382   1
  13  13   7-71.3512 231.783   4
 -13 -13   7 136.710 207.177   1
  13  13   7-252.043 222.137   2
  13  13   8 5020.65 543.399   4
  13 -13   8 3911.26 612.021   1
  13  13   8 5205.11 539.924   2
 -13 -13   8 4511.04 700.485   1
 -13  13   9 1117.89 277.101   4
  13  13   9 1342.07 360.623   4
  13 -13   9 1368.33 406.708   1
 -13 -13   9 2222.83 561.015   1
  13  13   9 1379.63 279.893   2
 -13  13  10 34344.2 1362.75   4
  13  13  10 34398.9 1472.69   4
  13  13  10 37081.8 1479.08   2
 -13  13  11 652.815 284.113   4
  13  13  11 94.1104 183.841   2
  13  13  11 99.3370 198.605   4
 -13  13  12 3397.09 468.498   4
  13  13  12 3083.94 485.193   4
  13  13  12 2694.79 406.856   2
  13  13  13 789.668 297.519   4
  13  13  13 264.647 174.396   2
  13  13  14 6990.27 687.731   4
  13  13  14 8924.48 727.936   2
  13  13  15 1865.00 323.641   2
  13  13  16 10387.0 677.338   2
  13  13  17 485.133 183.621   2
 -13 -15   0 444.971 271.035   1
 -13 -15   1 4596.54 656.024   1
 -13 -15   2 274.465 271.682   1
  13  15   2-50.2017 176.810   4
 -13 -15   3 320.815 255.433   1
  13  15   3 55.0400 189.544   4
 -13 -15   4 27.3776 251.343   1
  13  15   4 97.5754 182.462   4
 -13 -15   5 435.622 284.318   1
  13  15   5 1091.87 263.195   4
  13 -15   6 415.320 262.694   1
  13  15   6-263.778 259.691   4
 -13 -15   6-67.6011 266.062   1
  13  15   7 1019.37 269.515   4
 -13 -15   7 1071.56 312.522   1
  13 -15   7 561.655 379.120   1
  13  15   8 4022.19 510.653   4
  13  15   9 656.097 287.033   4
  13  15  10 1664.93 345.503   4
  13  15  11-317.322 272.563   4
  13  15  11 273.309 185.348   2
  13  15  12 1166.70 282.179   4
  13  15  12 1680.84 345.443   2
  13  15  13 171.970 174.095   4
  13  15  13-264.456 248.423   2
  13  15  14-127.078 193.214   4
  13  15  14-66.3419 165.602   2
  13  15  15 99.6414 118.558   2
  13  17   1 12216.4 813.207   4
 -13 -17   1 9374.51 989.873   1
 -13 -17   2-424.006 341.594   1
  13  17   2 105.470 193.463   4
  13 -17   3 5522.71 798.074   1
 -13 -17   3 4188.76 673.508   1
  13  17   3 6751.30 616.316   4
 -13 -17   4 2570.02 531.036   1
  13  17   4 4091.70 492.093   4
  13  17   5 20751.2 1087.92   4
  13  17   6 3314.15 477.183   4
  13  17   7 678.415 293.444   4
  13  17   8 1608.37 327.920   4
  13  17   9 983.908 274.713   4
  13  17  10 9427.23 747.443   4
  13  17  11-447.328 275.273   4
  13  17  12 130.667 166.602   4
  13  17  13-166.844 198.379   4
  13  17  14 2751.37 358.545   4
  13  19   0 487.395 291.414   4
  13  19  -1 40647.2 1454.23   4
  13  19   1 38487.3 1429.21   4
  13  19   2 842.079 270.497   4
  13  19   3 8709.37 705.534   4
  13  19   4 12063.2 823.509   4
  13  19   5 20689.5 1086.87   4
  13  19   6 8288.52 716.239   4
  13  19   7 1820.02 367.455   4
  13  19   8 1463.05 325.614   4
  13  19   9 2245.93 374.988   4
  13  19  10 20681.7 1010.30   4
  13  19  11 437.312 214.693   4
  13  19  12 1680.72 303.118   4
  13  19  13 39.8450 115.921   4
  13  21   0 216.959 204.005   4
  13  21   1 240.004 206.069   4
  13  21  -1-37.7850 205.820   4
  13  21   2 241.754 167.199   4
  13  21  -2 269.239 206.533   4
  13  21   3 178.529 211.277   4
  13  21  -3-65.1311 198.919   4
  13  21   4 197.874 218.825   4
  13  21   5 719.037 257.101   4
  13  21   6 1668.12 313.488   4
  13  21   7 182.655 168.734   4
  13  21   8 93.2343 152.994   4
  13  21   9 209.657 149.065   4
  13  21  10 1775.43 290.945   4
  13  23   0 123.751 171.782   4
  13  23   1 3975.46 440.081   4
  13  23  -1 4407.83 468.206   4
  13  23   2 94.6454 162.884   4
  13  23  -2 199.750 175.750   4
  13  23   3 1578.57 287.583   4
  13  23  -3 1580.04 303.078   4
  13  23  -4 1325.84 262.057   4
  13  23   4 1380.30 260.302   4
  13  23   5 2346.90 328.143   4
  13  23  -5 2532.65 324.595   4
  13  23   6 865.539 213.692   4
  13  23  -6 1036.55 223.088   4
  13  23   7-168.826 175.033   4
  13  23  -7 93.8540 111.779   4
  13  25   0-38.4678 122.876   4
  13  25  -1 3782.21 366.775   4
 -14   0   0 359331. 2918.97   1
 -14   0   1 1178.28 198.912   1
 -14   0  -1 707.003 156.989   1
 -14   0   2 45710.5 1046.26   1
 -14   0   3 1755.24 249.306   1
 -14   0   4 48034.6 1103.83   1
 -14   0   5 31164.0 932.394   1
 -14   0   6 246228. 2681.07   1
 -14   0   7 7637.00 506.667   1
 -14   0   8 1184.72 234.136   1
  14   0   8 1485.35 262.823   2
 -14   0   9 65231.6 1637.50   1
  14   0   9 67502.2 1764.00   2
 -14   0  10 17011.9 892.785   1
  14   0  10 18065.2 962.869   2
  14   0  11 66009.2 1890.59   2
  14   0  12 419.905 169.609   2
  14   0  13 3175.77 445.547   2
  14   0  14-22.9577 275.511   2
  14   0  15 52810.2 1824.54   2
  14   0  16 18082.6 1051.82   2
  14   0  17 833.797 247.458   2
  14   0  18 378.432 143.399   2
  14   0  19 7196.05 538.057   2
 -14  -2   0 228592. 2289.27   1
 -14  -2   1 2427.00 239.164   1
 -14  -2  -1 3284.16 286.574   1
 -14   2   2 671.218 143.477   1
 -14  -2  -2 882.663 148.306   1
 -14  -2   2 700.461 139.790   1
 -14  -2  -3 3532.78 292.729   1
 -14  -2   3 3553.99 309.916   1
 -14   2   3 3678.48 323.537   1
 -14   2   4 4514.72 373.237   1
 -14  -2   4 4079.43 345.746   1
 -14  -2   5 21984.7 804.488   1
 -14   2   5 22266.1 825.864   1
 -14  -2   6 2704.39 291.200   1
 -14   2   6 3082.44 325.314   1
 -14  -2   7 2879.62 322.471   1
 -14   2   7 3034.63 337.795   1
 -14   2   8 3996.04 406.296   1
 -14  -2   8 3709.61 368.380   1
  14   2   8 3981.77 421.803   2
 -14   2   8 4694.18 434.892   2
  14   2   9 55663.5 1769.49   4
 -14   2   9 66803.7 1774.52   1
  14  -2   9 59660.8 1642.10   2
 -14  -2   9 66548.8 1713.14   1
  14   2   9 67759.7 1780.14   2
 -14   2   9 71860.5 1680.12   2
 -14  -2  10 409.506 215.435   1
  14  -2  10 59.6157 144.594   2
  14   2  10 203.836 210.614   2
  14  -2  11 22032.0 1061.09   2
  14   2  11 21953.3 1124.29   2
 -14   2  11 22090.9 1007.09   2
 -14  -2  11 21339.1 1081.17   1
  14  -2  12-360.606 287.146   2
  14   2  12-247.794 263.399   2
  14  -2  13 7377.32 666.803   2
  14   2  13 7084.43 685.906   2
  14  -2  14 1831.70 357.167   2
  14   2  14 1751.63 370.476   2
  14  -2  15 1093.50 315.388   2
  14   2  15 1432.63 394.292   2
  14  -2  16 303.076 157.437   2
  14   2  16 505.191 276.268   2
  14   2  17 80.6501 243.182   2
  14   2  18 4971.11 517.260   2
  14   2  19 767.348 218.236   2
 -14  -4   0 54517.9 1208.83   1
 -14  -4  -1 60.0255 125.064   1
 -14  -4   1 149.569 141.110   1
 -14  -4   2 3290.62 359.669   1
 -14  -4  -2 3214.34 278.392   1
 -14  -4  -3 5261.99 348.201   1
 -14  -4   3 5160.28 421.053   1
 -14  -4   4 40821.4 1170.02   1
 -14  -4  -4 41595.4 956.627   1
 -14  -4   5 106786. 1948.76   1
 -14  -4   6 37465.9 1209.29   1
  14   4   7 13821.7 741.303   2
 -14  -4   7 14594.8 786.808   1
 -14   4   7 14643.8 757.096   2
  14   4   8 110.417 193.441   4
 -14  -4   8 169.199 146.167   1
  14   4   8 118.198 161.145   2
  14   4   9 11443.2 875.159   4
 -14  -4   9 10710.0 728.942   1
  14   4   9 10744.2 731.825   2
 -14   4   9 12784.0 739.819   2
 -14   4  10 1161.16 305.145   2
  14   4  10 942.318 363.311   4
 -14  -4  10 466.491 175.814   1
  14   4  10 984.248 256.212   2
  14   4  11 5006.70 716.040   4
  14   4  11 4143.81 532.948   2
 -14  -4  11 3985.03 488.181   1
 -14   4  11 4598.01 504.178   2
 -14   4  12 1082.21 332.016   2
  14   4  12 6.32598 272.829   2
  14   4  13 10115.1 811.792   2
  14   4  14 7064.21 704.107   2
  14   4  15 13372.6 969.049   2
  14   4  16 11627.8 889.601   2
  14   4  17 4245.21 534.640   2
  14   4  18 63.3990 206.597   2
  14   4  19-334.231 204.035   2
 -14  -6   0 175019. 2421.86   1
 -14  -6  -1 2593.61 309.527   1
 -14  -6   1 2919.61 370.401   1
 -14  -6  -2 7841.17 482.527   1
 -14  -6   2 9574.83 628.161   1
 -14  -6  -3 16774.5 646.445   1
 -14  -6   3 17445.7 853.441   1
 -14  -6   4 228163. 3070.54   1
 -14  -6  -4 226848. 2241.70   1
 -14  -6   5 100570. 2107.60   1
 -14  -6   6 141608. 2549.72   1
  14   6   7 81577.9 1884.56   2
 -14   6   7 84405.3 1821.73   2
 -14  -6   7 84407.2 2039.26   1
 -14   6   8 1267.21 274.331   2
  14   6   8 1557.76 362.839   4
 -14  -6   8 1366.68 324.479   1
  14   6   8 763.806 215.708   2
  14   6   9 54523.6 1865.13   4
 -14  -6   9 50692.5 1735.84   1
  14   6   9 51288.2 1616.91   2
 -14   6   9 52271.7 1482.83   2
  14   6  10 9927.88 836.965   4
 -14  -6  10 7716.94 718.727   1
  14   6  10 8694.98 715.638   2
 -14   6  10 9732.61 676.258   2
  14   6  11 5115.92 661.375   4
 -14  -6  11 3929.96 534.502   1
  14   6  11 5332.39 586.777   2
 -14   6  11 4596.50 521.158   2
 -14   6  12 807.547 343.168   2
  14   6  12 923.691 437.707   4
 -14  -6  12-219.143 254.376   1
  14   6  12-49.0306 316.269   2
  14   6  13 12731.2 932.679   2
  14   6  14 1409.25 338.130   2
  14   6  15 73271.0 2201.94   2
  14   6  16 16088.0 1010.26   2
  14   6  17 8053.33 677.909   2
  14   6  18-334.451 227.453   2
  14   6  19 226.693 129.841   2
 -14  -8   0 190652. 2819.15   1
 -14  -8   1 3847.02 425.351   1
 -14  -8  -1 4109.67 438.578   1
 -14  -8   2 6485.85 554.300   1
 -14  -8  -2 6572.74 504.896   1
 -14  -8  -3 22895.6 857.760   1
 -14  -8   3 24860.3 1105.25   1
 -14  -8   4 115634. 2394.31   1
 -14  -8   5 59132.9 1755.87   1
  14   8   6 41652.1 1353.64   4
 -14  -8   6 44232.5 1544.36   1
  14   8   6 43429.0 1362.95   2
  14   8   7 20737.7 1007.77   4
  14   8   7 21163.6 1002.59   2
 -14  -8   7 21102.4 1121.18   1
  14   8   8 39.9661 175.153   4
 -14  -8   8 86.9774 202.537   1
  14   8   8 142.891 185.386   2
 -14   8   8 580.157 273.254   2
  14   8   9 8852.68 754.822   4
  14  -8   9 6658.83 669.412   1
  14   8   9 9007.36 711.374   2
 -14   8   9 9367.73 673.945   2
 -14  -8   9 8894.49 810.860   1
 -14   8  10 382.589 285.839   2
 -14   8  10 490.525 265.819   4
  14   8  10 221.463 200.820   4
  14   8  10 182.405 210.312   2
 -14  -8  10 103.382 220.614   1
  14   8  11 17209.8 1111.28   4
 -14  -8  11 16739.4 1153.92   1
  14   8  11 19085.6 1094.54   2
 -14   8  11 20346.2 1002.41   2
  14   8  12 106.961 241.233   4
 -14  -8  12-88.8460 240.046   1
  14   8  12-210.187 292.652   2
  14   8  13 5315.64 690.994   4
  14   8  13 5849.28 630.413   2
  14   8  14 6059.52 656.700   2
  14   8  15 29631.7 1384.60   2
  14   8  16 4714.25 555.683   2
  14   8  17 468.521 181.577   2
  14   8  18-306.368 216.042   2
  14   8  19-306.120 169.965   2
 -14 -10   0 23838.2 1112.18   1
 -14 -10   1 1147.11 310.749   1
 -14 -10  -1 1430.32 291.747   1
 -14 -10   2 11493.9 810.443   1
 -14 -10  -2 10878.0 727.045   1
 -14 -10   3 849.250 249.397   1
  14  10   3 942.957 208.590   4
 -14 -10  -3 883.508 236.299   1
  14  10   4 284.324 152.957   2
 -14 -10   4 328.892 204.332   1
 -14 -10   5 1844.87 323.529   1
  14  10   5 2701.16 360.044   4
  14  10   5 2317.21 339.860   2
  14  10   6 92.0288 163.049   4
 -14 -10   6-406.133 327.776   1
  14  10   6-52.0482 171.587   2
 -14 -10   7-128.648 237.784   1
  14  10   7-81.7894 200.077   4
  14  10   7 259.646 209.373   2
  14  10   8 5415.52 540.324   4
  14  10   8 5371.28 552.713   2
 -14 -10   8 5437.32 663.642   1
  14  10   9 35972.2 1443.06   4
  14 -10   9 31566.0 1570.10   1
  14  10   9 37047.2 1464.82   2
 -14 -10   9 33334.4 1604.87   1
 -14  10  10 581.938 251.082   4
  14  10  10 597.819 300.777   4
  14  10  10 183.407 208.697   2
 -14 -10  10 586.030 330.423   1
 -14  10  11 7091.90 648.675   4
 -14 -10  11 6103.38 758.128   1
  14  10  11 6838.36 678.446   2
  14  10  11 6976.73 694.401   4
  14  10  12-35.5619 302.189   4
  14  10  12-16.1719 228.043   2
  14  10  13 3047.05 526.545   4
  14  10  13 3003.83 471.712   2
  14  10  14 499.214 332.344   4
  14  10  14 341.827 248.746   2
  14  10  15 919.756 281.439   2
  14  10  16 289.555 178.585   2
  14  10  17-137.704 196.478   2
  14  10  18 80.9575 128.139   2
 -14 -12   0 197216. 3543.54   1
 -14 -12  -1 2458.29 435.390   1
 -14 -12   1 2477.73 455.624   1
  14  12   2 8093.63 574.299   4
 -14 -12   2 7860.97 742.485   1
 -14 -12  -2 7866.34 694.811   1
 -14 -12   3 616.506 200.386   1
  14  12   3 1131.73 247.541   4
 -14 -12   4 35189.4 1552.68   1
  14  12   4 34869.0 1267.61   4
  14  12   5 14233.1 827.450   4
 -14 -12   5 14111.4 1018.10   1
  14  12   6 18502.8 960.433   4
  14  12   6 17235.4 906.024   2
 -14 -12   6 16993.2 1123.95   1
  14  12   7 15.6519 198.538   4
 -14 -12   7-43.8938 218.317   1
  14  12   7 437.419 197.609   2
  14  12   8 1488.22 330.781   4
  14 -12   8 1109.59 290.901   1
 -14 -12   8 1820.36 472.852   1
  14  12   8 1667.47 353.449   2
  14  12   9 18695.0 1058.78   4
  14 -12   9 15289.6 1192.66   1
  14  12   9 18863.9 1055.25   2
 -14 -12   9 17365.0 1254.90   1
  14  12  10 5363.93 630.547   4
  14  12  10 6104.29 633.984   2
 -14 -12  10 5208.91 710.803   1
  14  12  11 50419.6 1792.35   4
  14  12  11 54876.2 1855.12   2
  14  12  12 652.975 317.419   4
  14  12  12 357.033 219.467   2
  14  12  13 818.577 306.792   4
  14  12  13 344.078 183.878   2
  14  12  14 1228.62 372.299   4
  14  12  14 1282.88 344.981   2
  14  12  15 19033.0 997.847   2
  14  12  16 2932.68 371.253   2
  14  12  17 627.171 164.383   2
 -14 -14   0 104389. 2839.98   1
 -14 -14   1 586.552 279.391   1
 -14 -14  -1 879.287 323.768   1
 -14 -14   2 1704.05 388.614   1
  14  14   2 1755.94 326.228   4
 -14 -14   3-119.675 247.472   1
  14  14   3 78.0764 173.202   4
 -14 -14   4 1660.49 377.944   1
  14  14   4 2290.50 353.885   4
 -14 -14   5 5308.92 677.942   1
  14  14   5 6751.46 605.241   4
  14  14   6 48.1389 185.946   4
 -14 -14   6-76.3954 274.216   1
  14  14   7-245.877 263.626   4
  14 -14   7-22.9280 353.356   1
 -14 -14   7-27.6117 308.240   1
  14  14   8 2.66166 196.531   4
  14 -14   8 380.400 276.099   1
 -14 -14   8 439.089 310.063   1
  14  14   8-217.697 207.937   2
  14  14   9 23682.3 1188.63   4
  14  14   9 25241.5 1187.69   2
  14  14  10 1616.65 370.672   4
  14  14  10 1243.65 307.122   2
  14  14  11 14443.6 966.034   4
  14  14  11 16207.3 980.392   2
  14  14  12-204.747 263.718   4
  14  14  12-60.4331 186.310   2
  14  14  13 46.5166 183.394   4
  14  14  13 153.921 201.693   2
  14  14  14 401.178 251.670   4
  14  14  14-418.920 291.658   2
  14  14  15 386.774 154.350   2
  14  14  16 837.449 193.870   2
 -14 -16   0 7706.79 853.830   1
  14  16   1 421.523 246.890   4
 -14 -16   1-150.072 344.483   1
 -14 -16   2 2118.40 471.691   1
  14  16   2 3429.74 450.111   4
 -14 -16   3 998.425 340.519   1
  14  16   3 1823.25 347.975   4
  14  16   4 15540.1 932.042   4
 -14 -16   4 12447.0 1118.69   1
  14 -16   5 9403.55 990.670   1
  14  16   5 10516.2 799.981   4
 -14 -16   5 8803.99 941.776   1
  14  16   6 1791.75 334.130   4
  14  16   7 125.578 184.419   4
  14  16   8 1111.46 316.607   4
  14  16   9 293.533 185.617   4
  14  16  10-315.847 256.981   4
  14  16  11-389.208 278.925   4
  14  16  12-320.376 223.553   4
  14  16  13 6245.35 588.819   4
  14  16  14 672.909 202.565   4
  14  18   0 33195.5 1330.77   4
  14  18   1 360.042 227.381   4
  14  18   2 83.8047 212.421   4
  14  18   3 3504.41 487.674   4
  14  18   4 41264.1 1515.90   4
  14  18   5 19468.3 1058.08   4
  14  18   6 10429.7 810.214   4
  14  18   7 9316.30 742.139   4
  14  18   8 83.0375 196.644   4
  14  18   9 5919.47 585.369   4
  14  18  10 413.027 192.729   4
  14  18  11 7928.34 649.967   4
  14  18  12-295.167 200.413   4
  14  18  13 2904.47 364.913   4
  14  20   0 12525.2 817.961   4
  14  20   1-63.6434 220.180   4
  14  20  -1 278.687 187.109   4
  14  20   2 827.216 262.549   4
  14  20  -2 761.526 279.700   4
  14  20   3 1183.25 303.818   4
  14  20   4 14749.6 909.196   4
  14  20   5 11389.6 796.307   4
  14  20   6 12961.6 837.024   4
  14  20   7 4874.67 522.626   4
  14  20   8-303.531 213.710   4
  14  20   9 6182.70 569.301   4
  14  20  10 755.648 249.461   4
  14  20  11 2515.24 329.986   4
  14  22   0 5457.20 546.429   4
  14  22  -1-94.9750 179.918   4
  14  22   1-37.0438 167.332   4
  14  22   2 1724.29 345.092   4
  14  22  -2 2546.95 364.384   4
  14  22   3-59.5140 183.215   4
  14  22  -3-17.5306 167.579   4
  14  22  -4 143.302 184.200   4
  14  22   4 361.789 217.419   4
  14  22   5 167.420 181.622   4
  14  22  -5 208.027 169.611   4
  14  22   6 319.338 176.717   4
  14  22   7 368.620 154.379   4
  14  22   8-123.206 130.631   4
  14  22   9 611.239 179.137   4
  14  24   0 13410.9 721.489   4
  14  24   1 395.228 184.017   4
  14  24  -1 413.280 172.966   4
  14 -24   1-24.7334 237.772   3
  14  24   2 3175.29 363.854   4
  14  24  -2 2242.02 314.633   4
  14  24   3 169.569 158.904   4
  14  24  -3-40.4216 119.469   4
  14  24   4 1361.36 241.770   4
  14  24  -4 1383.78 249.099   4
  14  24   5 1015.43 203.439   4
  14  24  -5 1348.86 227.494   4
 -15  -1   0 1101.28 210.324   1
 -15   1   0 768.062 163.958   1
 -15   1   1 201324. 2396.02   1
 -15  -1  -1 208650. 2279.54   1
 -15  -1   1 204386. 2271.25   1
 -15  -1  -2 1104.01 179.218   1
 -15  -1   2 1379.56 227.440   1
 -15   1   2 1017.17 188.652   1
 -15  -1   3 1102.01 221.306   1
 -15   1   3 822.976 174.424   1
 -15   1   4 13853.5 638.104   1
 -15  -1   4 13909.6 628.982   1
 -15   1   5 50417.1 1219.27   1
 -15  -1   5 51991.7 1236.04   1
 -15   1   6 13303.9 659.412   1
 -15  -1   6 12958.2 650.409   1
 -15   1   7 2400.86 294.871   1
 -15  -1   7 2698.32 331.950   1
 -15   1   8 31700.0 1117.43   1
  15  -1   8 29470.3 1123.32   2
 -15  -1   8 32244.7 1120.98   1
  15   1   8 32559.3 1189.42   2
  15  -1   9 8905.80 646.212   2
  15   1   9 9781.33 695.302   2
 -15   1   9 8761.42 639.585   1
 -15  -1   9 9307.54 649.710   1
 -15   1  10 122127. 2502.03   1
 -15  -1  10 121527. 2450.84   1
  15  -1  10 123221. 2480.26   2
  15   1  10 119871. 2502.03   2
 -15  -1  11 814.809 260.051   1
  15  -1  11 898.345 288.697   2
  15   1  11 866.290 301.300   2
  15  -1  12 15343.9 937.914   2
  15   1  12 16362.7 994.909   2
  15  -1  13-73.3789 256.631   2
  15   1  13-103.231 269.821   2
  15  -1  14 4318.63 523.776   2
  15   1  14 4144.45 532.580   2
  15  -1  15 5383.12 587.845   2
  15   1  15 4950.70 606.886   2
  15   1  16 8692.61 759.441   2
  15  -1  16 9246.89 734.382   2
  15  -1  17-182.484 187.704   2
  15   1  17-20.6889 224.468   2
  15   1  18 4430.91 480.524   2
  15  -1  18 3168.55 384.872   2
  15   1  19 15606.3 797.286   2
 -15  -3   0 84.4375 157.731   1
 -15  -3  -1 1164.99 207.174   1
 -15  -3   1 529.340 117.443   1
 -15  -3  -2 1902.03 229.936   1
 -15  -3   2 1610.46 226.466   1
 -15  -3   3 25776.0 881.018   1
 -15  -3  -3 27652.3 819.729   1
 -15  -3   4 11305.1 604.122   1
 -15  -3   5 90411.5 1734.94   1
 -15  -3   6 13502.5 699.136   1
 -15  -3   7 162.208 137.076   1
 -15  -3   8 12883.7 743.568   1
  15   3   8 13111.6 764.325   2
  15   3   9 7564.49 712.653   4
 -15  -3   9 7584.35 598.190   1
  15  -3   9 6692.92 551.337   2
  15   3   9 7600.13 616.594   2
  15   3  10 7118.84 781.867   4
  15  -3  10 5389.60 527.053   2
  15   3  10 5720.19 565.599   2
 -15  -3  10 5759.01 548.491   1
 -15  -3  11 740.845 225.383   1
  15  -3  11 622.644 240.811   2
  15   3  11 582.399 227.399   2
  15   3  12 17555.0 1063.30   2
  15  -3  12 15880.5 915.896   2
  15  -3  13 979.671 265.996   2
  15   3  13 1375.80 325.495   2
  15  -3  14 3601.51 480.138   2
  15   3  14 3451.49 486.474   2
  15   3  15 2053.94 393.907   2
  15   3  16 4079.14 528.968   2
  15   3  17 2802.06 439.213   2
  15   3  18 1796.64 318.546   2
  15   3  19 3029.21 376.530   2
 -15  -5   0 641.055 197.658   1
 -15  -5  -1 38.6744 127.336   1
 -15  -5   1 295.278 171.540   1
 -15  -5  -2 600.234 136.766   1
 -15  -5   2 1177.09 268.839   1
 -15  -5   3 43284.1 1269.92   1
 -15  -5  -3 44320.5 1052.63   1
 -15  -5   4 132064. 2262.81   1
 -15  -5  -4 129593. 1758.19   1
 -15  -5   5 161091. 2539.51   1
 -15  -5   6 103808. 2123.01   1
  15   5   7 40483.3 1319.03   2
 -15  -5   7 41266.6 1397.92   1
 -15  -5   8 192.599 173.740   1
  15   5   8 217.345 249.622   4
  15   5   8 27.2113 169.109   2
  15   5   9 3159.00 482.923   4
 -15  -5   9 3083.00 421.845   1
 -15   5   9 4342.54 488.372   2
  15   5   9 3456.72 423.848   2
  15   5  10 12865.2 1060.21   4
 -15  -5  10 11011.1 821.534   1
  15   5  10 11093.6 795.091   2
 -15   5  10 12106.9 775.118   2
  15   5  11 805.275 458.969   4
 -15  -5  11-161.230 264.681   1
  15   5  11 449.523 252.318   2
 -15  -5  12 2701.11 458.261   1
  15   5  12 2635.25 446.484   2
  15   5  13 1573.33 344.279   2
  15   5  14 51047.7 1876.03   2
  15   5  15 19151.3 1143.89   2
  15   5  16 46613.8 1713.44   2
  15   5  17 8560.21 715.583   2
  15   5  18 89.3299 199.036   2
  15   5  19 282.781 158.312   2
 -15  -7   0 1558.77 301.634   1
 -15  -7  -1 109670. 1977.13   1
 -15  -7   1 111731. 2146.74   1
 -15  -7  -2 2326.66 305.659   1
 -15  -7   2 3076.55 434.944   1
 -15  -7  -3 273194. 2798.44   1
 -15  -7   3 275720. 3520.69   1
 -15  -7   4 36679.3 1321.81   1
 -15  -7   5 149766. 2708.13   1
 -15  -7   6 115962. 2431.33   1
  15   7   7 34146.2 1325.00   4
  15   7   7 36364.0 1286.85   2
 -15  -7   7 36461.2 1418.22   1
  15   7   8 2814.39 437.494   4
 -15  -7   8 2446.38 422.883   1
  15   7   8 2613.30 367.621   2
  15   7   9 6982.67 740.870   4
 -15  -7   9 5800.03 636.953   1
  15   7   9 6390.73 603.441   2
  15   7  10 23043.1 1287.98   4
 -15  -7  10 19833.2 1192.26   1
  15   7  10 22170.5 1119.78   2
  15   7  11 0.71121 270.922   4
 -15  -7  11 103.000 225.630   1
  15   7  11 40.6211 212.458   2
  15   7  12 2984.08 599.052   4
 -15  -7  12 1728.16 363.856   1
  15   7  12 2157.36 386.899   2
  15   7  13 70.4263 247.341   2
  15   7  14 77565.5 2256.02   2
  15   7  15 22244.5 1223.99   2
  15   7  16 47902.6 1699.47   2
  15   7  17 8655.49 685.218   2
  15   7  18-424.879 261.288   2
  15   7  19-347.113 198.352   2
 -15  -9   0 657.481 244.899   1
 -15  -9   1 1760.40 308.865   1
 -15  -9  -1 1543.42 295.077   1
 -15  -9   2 801.108 250.609   1
 -15  -9  -2 1303.52 286.650   1
 -15  -9  -3 44083.1 1280.02   1
 -15  -9   3 44454.6 1536.98   1
  15   9   4 19797.9 892.716   4
 -15  -9   4 22443.8 1115.56   1
  15   9   5 9174.45 641.203   4
  15   9   5 8960.31 620.036   2
 -15  -9   5 9669.17 764.932   1
  15   9   6 23761.9 1043.65   4
  15   9   6 23408.9 1038.09   2
 -15  -9   6 23257.9 1193.68   1
  15   9   7 5938.90 537.789   4
  15   9   7 6375.48 569.832   2
 -15  -9   7 6404.72 672.313   1
  15   9   8 6159.56 610.315   4
  15   9   8 5771.77 568.163   2
 -15  -9   8 5994.60 653.635   1
  15   9   9 1623.44 397.173   4
  15  -9   9 614.462 185.720   1
 -15  -9   9 1376.61 394.912   1
  15   9   9 1559.10 369.295   2
  15   9  10 544.988 290.769   4
  15   9  10 476.527 252.201   2
 -15  -9  10 721.644 311.297   1
 -15  -9  11 136.289 214.853   1
  15   9  11 40.1751 226.256   4
  15   9  11 128.708 223.515   2
  15   9  12 9916.06 870.394   4
 -15  -9  12 8003.71 834.202   1
  15   9  13 769.773 291.687   4
  15   9  13 925.099 292.443   2
  15   9  14 13775.7 947.059   2
  15   9  15 3495.88 507.907   2
  15   9  16 5318.46 580.530   2
  15   9  17 331.019 169.517   2
  15   9  18 649.339 147.164   2
 -15 -11   0 892.038 273.802   1
 -15 -11   1 141139. 2927.74   1
 -15 -11  -1 143510. 2810.65   1
 -15 -11   2 1567.32 330.354   1
  15  11   2 1828.22 287.276   4
 -15 -11  -2 2362.89 401.054   1
  15  11   3 3071.30 369.950   4
 -15 -11   3 2911.54 442.119   1
  15  11   4 2971.69 363.647   2
 -15 -11   4 2636.36 421.596   1
  15  11   5 7129.72 575.961   4
  15  11   5 6463.79 552.783   2
 -15 -11   5 5229.36 591.272   1
  15  11   6 13757.7 824.845   4
  15  11   6 13136.7 809.482   2
 -15 -11   6 11932.6 893.452   1
  15  11   7-115.860 216.621   4
  15  11   7 140.172 175.349   2
  15  11   8 14525.9 911.979   4
  15  11   8 14994.5 914.669   2
 -15 -11   8 13339.9 1043.03   1
  15  11   9 4898.30 571.700   4
  15 -11   9 3302.43 525.983   1
  15  11   9 4609.87 558.484   2
 -15 -11   9 4140.36 607.513   1
  15  11  10 83952.9 2273.48   4
  15  11  10 89101.5 2322.59   2
  15  11  11 1775.02 410.120   4
  15  11  11 2255.82 407.942   2
  15  11  12 23469.2 1253.84   4
  15  11  12 24279.3 1246.16   2
  15  11  13 24.5790 251.969   4
  15  11  13-183.183 244.275   2
  15  11  14 1570.16 400.651   4
  15  11  14 997.051 305.135   2
  15  11  15 1020.03 310.197   2
  15  11  16 544.501 153.744   2
  15  11  17-421.993 215.760   2
 -15 -13   0 756.822 360.039   1
 -15 -13   1 101013. 2711.83   1
 -15 -13  -1 105619. 2701.09   1
 -15 -13   2 1698.42 394.449   1
  15  13   2 2360.60 366.298   4
 -15 -13   3 909.084 306.774   1
  15  13   3 1300.16 271.232   4
 -15 -13   4 1880.55 386.348   1
  15  13   4 2207.34 348.374   4
  15  13   5 10764.1 750.857   4
 -15 -13   5 9278.07 849.326   1
  15  13   6 269.339 171.591   4
 -15 -13   6-126.021 284.680   1
  15  13   7-9.47983 230.593   4
 -15 -13   7 586.727 302.796   1
  15  13   7 2.47880 197.501   2
  15  13   8 3025.44 433.932   4
  15 -13   8 2854.37 564.997   1
 -15 -13   8 3018.71 537.210   1
  15  13   8 2935.21 426.279   2
  15  13   9 9275.19 773.162   4
  15  13   9 9088.19 754.508   2
 -15 -13   9 8048.80 884.091   1
  15  13  10 70994.5 2093.42   4
  15  13  10 75267.7 2111.30   2
  15  13  11 557.455 266.267   2
  15  13  11 469.497 265.953   4
  15  13  12 15194.3 1007.35   4
  15  13  12 16903.2 1013.82   2
  15  13  13-148.240 209.844   4
  15  13  13 54.1313 168.496   2
  15  13  14 4469.12 541.614   4
  15  13  14 4936.72 543.432   2
  15  13  15 1179.57 235.914   2
  15  13  16 3027.41 354.405   2
 -15 -15   0 237.254 256.592   1
  15  15   1 6815.95 595.103   4
 -15 -15   1 5598.49 728.170   1
  15  15   2 468.683 220.754   4
 -15 -15   2-98.0050 287.901   1
  15  15   3 13225.0 846.446   4
 -15 -15   3 11131.5 999.033   1
  15  15   4 1828.58 347.065   4
 -15 -15   4 1442.41 372.572   1
  15  15   5 9418.82 744.855   4
 -15 -15   5 8078.61 869.612   1
  15 -15   6 2467.33 506.196   1
  15  15   6 2667.35 404.601   4
 -15 -15   6 1760.65 419.684   1
  15  15   7-657.453 313.694   4
  15  15   8 14165.7 911.360   4
  15  15   9 2059.79 394.828   4
  15  15  10 10800.3 828.955   4
  15  15  10 11706.8 807.753   2
  15  15  11-281.703 270.740   4
  15  15  11-56.8950 154.025   2
  15  15  12 2681.80 433.731   4
  15  15  12 2980.30 423.636   2
  15  15  13 117.293 191.232   4
  15  15  13-235.346 222.902   2
  15  15  14 302.773 177.621   4
  15  15  14 266.361 136.000   2
  15  15  15-255.740 169.356   2
  15  17   0 308.046 222.674   4
  15  17   1 4086.30 489.776   4
 -15 -17   1 3205.57 579.340   1
  15  17   2 354.569 251.324   4
 -15 -17   2 41.3484 219.708   1
  15  17   3 21074.3 1106.21   4
  15  17   4 20519.1 1083.18   4
  15  17   5 20996.7 1105.51   4
  15  17   6 8374.97 725.461   4
  15  17   7 10100.6 773.934   4
  15  17   8 3939.83 495.864   4
  15  17   9-156.819 249.494   4
  15  17  10 2129.19 364.761   4
  15  17  11 60.4816 190.830   4
  15  17  12 22.9647 172.011   4
  15  17  13-221.385 188.016   4
  15  19   0 299.311 224.229   4
  15  19   1 15446.0 941.718   4
  15  19  -1 16027.8 936.007   4
  15  19   2-46.1641 256.188   4
  15  19   3 23193.1 1141.48   4
  15  19   4 12531.9 859.790   4
  15  19   5 37944.1 1468.71   4
  15  19   6 37300.0 1420.96   4
  15  19   7 7277.04 648.413   4
  15  19   8-110.263 210.600   4
  15  19   9 595.964 209.423   4
  15  19  10 10989.7 734.461   4
  15  19  11 6.85303 143.123   4
  15  19  12-23.1570 134.430   4
  15  21   0-54.2235 193.189   4
  15  21  -1 246.748 168.787   4
  15  21   1 133.131 191.836   4
  15  21   2 282.799 198.016   4
  15  21  -2 474.054 194.915   4
  15  21   3 1785.77 340.924   4
  15  21  -3 2693.16 393.967   4
  15  21   4 2562.86 393.778   4
  15  21   5 10190.2 708.592   4
  15  21   6 6210.67 560.582   4
  15  21   7 1149.01 257.413   4
  15  21   8 25.5474 138.632   4
  15  21   9 113.680 143.346   4
  15  21  10-134.791 136.062   4
  15  23   0 294.427 186.070   4
  15  23   1 14731.2 792.749   4
  15  23  -1 14868.9 797.790   4
  15  23   2 325.760 203.823   4
  15  23  -2-56.9523 136.147   4
  15 -23   2 219.064 299.514   3
  15  23   3 638.762 226.370   4
  15  23  -3-200.241 170.127   4
  15  23   4 25.9307 123.477   4
  15  23  -4-123.194 168.514   4
  15  23   5 206.966 142.438   4
  15  23  -5-147.710 172.315   4
  15  23   6-97.1743 127.426   4
  15  23  -6-280.557 166.342   4
  15  23   7-76.6499 126.773   4
  15  23  -7 72.7122 106.975   4
 -16   0   0 248637. 2681.40   1
 -16   0   1 23909.3 821.154   1
 -16   0  -1 23533.5 856.219   1
 -16   0   2 80089.5 1498.88   1
 -16   0   3 8392.94 501.251   1
 -16   0   4 46818.7 1173.08   1
 -16   0   5 106196. 1818.97   1
 -16   0   6 2419.06 295.687   1
 -16   0   7 3115.63 357.154   1
 -16   0   8 21888.7 942.778   1
  16   0   8 21812.3 980.970   2
  16   0   9 175529. 2905.07   2
 -16   0   9 175024. 2834.22   1
 -16   0  10 24864.5 1139.03   1
  16   0  10 25638.3 1160.02   2
  16   0  11 164045. 3017.08   2
 -16   0  11 148357. 2954.50   1
  16   0  12 283.469 213.143   2
  16   0  13 2073.04 356.824   2
  16   0  14 2165.90 377.797   2
  16   0  15 11783.1 868.150   2
  16   0  16 962.438 315.137   2
  16   0  17 799.203 232.686   2
  16   0  18 9975.32 681.696   2
 -16  -2   0 118535. 1787.89   1
 -16  -2  -1 1228.28 214.806   1
 -16  -2   1 1123.45 228.849   1
 -16  -2   2 6861.52 439.564   1
 -16   2   2 6724.82 482.638   1
 -16  -2  -2 7391.76 452.332   1
 -16   2   3 5998.36 453.598   1
 -16  -2   3 5793.88 411.092   1
 -16   2   4 5068.22 412.808   1
 -16  -2   4 5235.69 391.156   1
 -16   2   5 36931.0 1129.18   1
 -16  -2   5 37558.5 1102.87   1
 -16   2   6 766.484 182.619   1
 -16  -2   6 558.242 143.723   1
 -16   2   7 10985.4 676.054   1
 -16  -2   7 10812.8 640.075   1
 -16  -2   8 12213.6 729.582   1
  16  -2   8 10254.3 671.136   2
  16   2   8 11599.3 724.480   2
 -16   2   8 11130.1 714.404   1
 -16   2   9 42873.5 1496.17   1
  16  -2   9 39366.2 1357.04   2
  16   2   9 42647.9 1450.95   2
 -16  -2   9 43544.3 1446.56   1
 -16  -2  10 2087.27 360.185   1
  16  -2  10 2444.47 378.761   2
  16   2  10 2099.24 379.972   2
 -16  -2  11 26006.3 1241.46   1
  16  -2  11 25946.6 1178.23   2
  16   2  11 26171.8 1241.90   2
  16  -2  12 680.399 201.052   2
  16   2  12 615.468 254.780   2
  16  -2  13 433.113 223.135   2
  16   2  13 157.448 261.591   2
  16  -2  14-74.1355 208.784   2
  16   2  14-413.703 325.352   2
  16  -2  15 4183.73 499.600   2
  16   2  15 4308.59 559.889   2
  16  -2  16 804.902 267.860   2
  16   2  16 571.944 271.947   2
  16   2  17 2167.10 389.028   2
  16   2  18 5164.91 515.267   2
  16   2  19 7349.04 559.017   2
 -16  -4   0 8990.25 514.754   1
 -16  -4   1 785.082 151.715   1
 -16  -4  -1 500.020 111.574   1
 -16  -4   2 236.837 150.438   1
 -16  -4  -2 450.262 161.984   1
 -16  -4   3 5755.61 467.658   1
 -16  -4  -3 5469.47 397.220   1
 -16  -4   4 316110. 3404.84   1
 -16  -4  -4 332316. 3086.90   1
 -16  -4   5 67354.6 1613.12   1
 -16  -4   6 61979.4 1596.65   1
 -16  -4   7 47678.4 1440.63   1
  16   4   8 959.527 242.690   2
  16   4   8 925.939 284.744   4
 -16  -4   8 789.061 193.551   1
  16   4   9 7561.91 772.664   4
 -16  -4   9 7946.02 640.306   1
  16  -4   9 6053.34 534.841   2
  16   4   9 7206.04 609.051   2
  16   4  10 1196.31 465.386   4
  16  -4  10 570.490 217.571   2
 -16  -4  10 322.168 217.700   1
  16   4  10 647.263 267.433   2
 -16  -4  11 1610.97 348.721   1
  16   4  11 1296.07 330.273   2
  16   4  12 1110.90 303.220   2
 -16  -4  12 294.344 159.517   1
  16   4  13 31306.0 1444.52   2
  16   4  14 2576.25 431.428   2
  16   4  15 48325.1 1786.68   2
  16   4  16 12281.3 886.461   2
  16   4  17 16667.3 977.984   2
  16   4  18 7616.99 618.039   2
  16   4  19-55.7121 136.524   2
 -16  -6   0 96040.3 1857.51   1
 -16  -6  -1 1424.80 235.316   1
 -16  -6   1 2024.11 324.053   1
 -16  -6   2 46877.5 1376.48   1
 -16  -6  -2 43638.1 1149.14   1
 -16  -6   3 59166.7 1575.91   1
 -16  -6  -3 55607.8 1260.22   1
 -16  -6   4 187429. 2849.59   1
 -16  -6  -4 190282. 2272.68   1
 -16  -6   5 118573. 2332.25   1
 -16  -6   6 122898. 2435.65   1
  16   6   7 49328.7 1681.53   4
 -16  -6   7 51717.7 1651.62   1
  16   6   7 49803.2 1492.04   2
 -16  -6   8 1016.55 285.882   1
  16   6   8 1042.19 264.234   4
  16   6   8 924.100 224.096   2
  16   6   9 14706.9 1029.61   4
 -16  -6   9 11511.7 851.573   1
  16   6   9 13181.1 838.145   2
  16   6  10 186.010 276.364   4
 -16  -6  10 20.9440 188.678   1
  16   6  10-55.6645 185.153   2
  16   6  11 2363.11 533.377   4
 -16  -6  11 1679.33 352.390   1
  16   6  11 2220.93 379.064   2
  16   6  12 921.867 531.329   4
  16   6  12 512.767 249.481   2
 -16  -6  12 88.6076 214.658   1
  16   6  13 42401.3 1663.10   2
  16   6  14 17352.0 1090.35   2
  16   6  15 107152. 2627.34   2
  16   6  16 31719.6 1406.63   2
  16   6  17 13820.2 881.614   2
  16   6  18-108.843 219.763   2
  16   6  19-281.258 188.449   2
 -16  -8   0 28702.3 1143.41   1
 -16  -8   1 331.591 228.071   1
 -16  -8  -1 56.3660 156.938   1
 -16  -8  -2 91208.5 1846.28   1
 -16  -8   2 94836.8 2165.94   1
 -16  -8  -3 17545.2 776.197   1
 -16  -8   3 19335.7 1028.08   1
 -16  -8   4 74083.8 1983.49   1
  16   8   5 41203.0 1331.40   4
 -16  -8   5 47921.0 1626.54   1
  16   8   6 49142.8 1518.60   4
  16   8   6 51104.4 1517.92   2
 -16  -8   6 50152.6 1691.80   1
  16   8   7 34694.4 1379.50   4
  16   8   7 34385.1 1291.87   2
 -16  -8   7 35473.4 1450.88   1
  16   8   8 3347.88 496.499   4
 -16  -8   8 3447.98 509.464   1
  16   8   8 2937.57 398.137   2
  16   8   9 1448.46 366.730   4
  16  -8   9 685.969 225.783   1
  16   8   9 1308.52 312.652   2
 -16  -8   9 1015.69 283.446   1
 -16  -8  10 731.527 264.895   1
  16   8  10 691.802 258.623   4
  16   8  10 1149.79 314.480   2
  16   8  11-200.185 285.220   4
 -16  -8  11 126.318 164.465   1
  16   8  11 0.57618 239.503   2
  16   8  12-97.3540 246.677   4
 -16  -8  12-27.8920 264.769   1
  16   8  12-653.152 369.072   2
  16   8  13 47355.7 1948.02   4
  16   8  13 46144.7 1728.82   2
  16   8  14 7146.87 708.023   2
  16   8  15 74358.2 2133.05   2
  16   8  16 19795.5 1084.68   2
  16   8  17 6581.23 568.786   2
  16   8  18 4.38277 168.617   2
 -16 -10   0 137400. 2722.96   1
 -16 -10   1 2646.51 460.989   1
 -16 -10  -1 2369.57 406.065   1
 -16 -10  -2 22317.7 1024.65   1
 -16 -10   2 20745.8 1114.86   1
  16  10   3 6858.97 540.012   4
 -16 -10   3 7896.49 708.839   1
  16  10   4 9634.94 659.322   4
 -16 -10   4 10737.1 812.058   1
  16  10   5 484.011 190.226   2
  16  10   5 859.483 255.801   4
 -16 -10   5 413.230 256.627   1
  16 -10   5 275.036 207.369   3
  16  10   6-170.672 230.205   4
 -16 -10   6 53.7986 196.472   1
  16  10   6-43.7325 169.026   2
  16  10   7 7870.48 634.179   4
  16  10   7 7822.21 646.994   2
 -16 -10   7 7259.45 732.238   1
  16  10   8 1812.43 385.437   4
 -16 -10   8 1672.32 425.971   1
  16  10   8 2113.06 375.656   2
 -16 -10   9 5622.99 683.959   1
  16  10   9 6713.84 655.677   4
  16 -10   9 4462.95 602.773   1
  16  10   9 6918.71 655.840   2
  16  10  10 1661.58 401.295   4
  16  10  10 1458.36 352.288   2
 -16 -10  10 1448.28 372.848   1
  16  10  11 46112.0 1787.51   4
  16  10  11 48446.5 1750.67   2
  16  10  12 987.471 264.123   4
  16  10  12 1200.42 330.606   2
  16  10  13 9624.55 841.783   4
  16  10  13 9111.10 776.225   2
  16  10  14 163.757 195.689   2
  16  10  15 1419.62 344.942   2
  16  10  16-47.0166 144.434   2
  16  10  17-125.728 219.128   2
  16  10  18 2133.62 294.485   2
 -16 -12   0 298282. 4428.43   1
 -16 -12   1 1575.52 433.526   1
 -16 -12  -1 1681.86 407.000   1
  16  12   2 27616.2 1077.65   4
 -16 -12   2 25238.0 1328.83   1
  16  12   3 244.529 166.861   4
 -16 -12   3 269.529 242.999   1
  16  12   4 9017.11 657.991   4
 -16 -12   4 7148.74 717.864   1
  16  12   5 12038.1 773.589   4
  16  12   5 10642.3 718.697   2
 -16 -12   5 10770.2 922.089   1
  16  12   6 1488.09 323.143   4
 -16 -12   6 2098.48 489.713   1
  16  12   6 1675.27 317.070   2
  16  12   7 71.1168 206.881   4
 -16 -12   7 586.836 285.410   1
  16  12   7-59.0859 220.237   2
  16  12   8 1849.44 362.774   4
  16 -12   8 1772.57 390.672   1
 -16 -12   8 1815.10 437.266   1
  16  12   8 2113.76 379.538   2
  16  12   9 79220.2 2170.20   4
  16  12   9 83370.9 2228.24   2
  16  12  10 9441.33 793.119   4
  16  12  10 9264.96 785.421   2
  16  12  11 85702.1 2366.85   4
  16  12  11 93934.9 2413.80   2
  16  12  12 381.440 262.094   4
  16  12  12 10.9709 208.080   2
  16  12  13 1285.53 341.329   4
  16  12  13 1120.87 281.791   2
  16  12  14 373.411 216.193   2
  16  12  15 3522.07 450.018   2
  16  12  16 607.435 167.581   2
  16  12  17-111.076 164.522   2
 -16 -14   0 51293.0 2011.80   1
 -16 -14   1 3757.41 598.278   1
  16  14   2 11813.2 763.755   4
 -16 -14   2 9786.23 913.979   1
  16  14   3 930.553 268.195   4
 -16 -14   3 371.769 228.867   1
  16  14   4 1418.99 316.288   4
 -16 -14   4 953.800 289.528   1
  16  14   5 3395.69 459.171   4
 -16 -14   5 3274.24 584.902   1
  16  14   6 4.09453 173.936   4
 -16 -14   6 686.293 368.767   1
  16 -14   7 477.631 344.225   1
  16  14   7 192.047 185.412   4
 -16 -14   7 573.738 344.489   1
  16  14   8 6886.51 657.772   4
  16  14   8 7439.44 643.387   2
  16  14   9 51582.1 1766.52   4
  16  14   9 54094.8 1746.84   2
  16  14  10 2247.17 384.977   2
  16  14  10 2274.56 404.422   4
  16  14  11 26025.6 1275.32   4
  16  14  11 28718.7 1292.80   2
  16  14  12 175.931 205.167   4
  16  14  12 177.958 171.240   2
  16  14  13 2714.30 414.971   4
  16  14  13 3721.10 459.091   2
  16  14  14 94.7690 171.762   4
  16  14  14-457.577 213.606   2
  16  14  15 2512.45 332.622   2
  16  16   1 226.698 225.036   4
 -16 -16   1 437.271 330.782   1
  16  16   2 5093.36 537.759   4
 -16 -16   2 4467.02 695.083   1
  16  16   3 2192.74 388.276   4
 -16 -16   3 2019.66 493.050   1
  16  16   4 38499.6 1475.01   4
 -16 -16   4 29733.1 1707.20   1
  16  16   5 15347.1 949.301   4
  16  16   6 5481.71 582.026   4
  16  16   7 22631.2 1141.42   4
  16  16   8 3808.85 492.446   4
  16  16   9 7201.15 658.460   4
  16  16  10-314.893 286.038   4
  16  16  11 52.9388 186.278   4
  16  16  12 165.962 208.221   4
  16  16  13 1741.22 328.184   4
  16  18   0 46660.1 1574.38   4
  16  18   1 1758.90 358.768   4
  16  18  -1 1571.87 320.634   4
  16  18   2 213.565 223.224   4
  16  18   3 7031.93 637.677   4
  16  18   4 48380.9 1668.64   4
  16  18   5 24378.0 1193.86   4
  16  18   6 46284.7 1618.65   4
  16  18   7 28465.3 1267.18   4
  16  18   8 742.278 216.774   4
  16  18   9 1317.83 277.677   4
  16  18  10 91.9603 186.973   4
  16  18  11 2606.84 392.067   4
  16  18  12-59.4229 143.708   4
  16  18  13 5352.83 468.743   4
  16  20   0 6273.44 585.662   4
  16  20   1 69.5689 177.504   4
  16  20  -1 217.907 175.558   4
  16  20  -2 3625.95 462.260   4
  16  20   2 2737.31 408.427   4
  16  20   3 2280.76 383.959   4
  16  20   4 23870.4 1138.43   4
  16  20   5 26554.7 1177.65   4
  16  20   6 20590.3 1034.80   4
  16  20   7 11138.8 765.489   4
  16  20   8-190.693 188.437   4
  16  20   9 798.996 228.158   4
  16  20  10 375.505 186.369   4
  16  20  11 605.287 185.843   4
  16  22   0 14521.7 832.145   4
  16  22  -1 1263.35 278.680   4
  16  22   1 740.704 215.656   4
  16  22  -2 2680.33 366.101   4
  16  22   2 2340.85 337.990   4
  16  22   3 418.276 180.673   4
  16  22  -3 510.440 179.249   4
  16  22   4 2580.49 368.562   4
  16  22  -4 3265.20 380.586   4
  16  22   5 558.113 197.348   4
  16  22  -5 907.044 231.430   4
  16  22   6 552.155 164.858   4
  16  22  -6 485.848 162.991   4
  16  22   7 92.5528 125.002   4
  16  22  -7 149.650 123.833   4
  16  22   8 3.75952 141.836   4
  16  24   0 26460.0 965.525   4
  16 -24   0 19316.5 1122.41   3
  16  24   1 1202.59 254.185   4
  16  24  -1 918.030 220.914   4
  16  24   2 7964.59 529.398   4
  16  24  -2 8438.22 561.326   4
  16  24  -3 49.9939 121.575   4
  16  24   3 410.436 162.408   4
 -17  -1   0 1035.80 209.209   1
 -17  -1   1 102116. 1731.04   1
 -17   1   1 102954. 1858.85   1
 -17  -1  -1 107210. 1809.41   1
 -17   1   2 3154.99 334.052   1
 -17  -1   2 3531.23 345.494   1
 -17  -1  -2 3319.54 344.350   1
 -17   1   3 701.332 174.025   1
 -17  -1   3 841.048 217.849   1
 -17   1   4 3033.72 316.801   1
 -17  -1   4 3342.30 354.472   1
 -17   1   5 2428.42 303.474   1
 -17  -1   5 2821.16 331.013   1
 -17   1   6 333.308 136.271   1
 -17  -1   6 650.543 206.138   1
 -17   1   7 2883.54 348.354   1
 -17  -1   7 3315.42 378.097   1
 -17  -1   8 61251.4 1631.82   1
 -17   1   8 61853.0 1655.79   1
  17  -1   8 58583.2 1611.50   2
  17   1   8 61018.3 1662.69   2
 -17   1   9 19533.9 998.498   1
 -17  -1   9 19318.9 976.499   1
  17  -1   9 20368.2 996.168   2
  17   1   9 19647.5 986.919   2
 -17  -1  10 151460. 2879.87   1
 -17   1  10 151659. 2985.78   1
  17  -1  10 148690. 2787.74   2
  17   1  10 149254. 2839.19   2
 -17  -1  11 1109.28 298.193   1
  17  -1  11 1618.01 353.361   2
  17   1  11 1189.20 351.769   2
  17  -1  12 24096.7 1194.52   2
  17   1  12 25560.2 1251.42   2
  17  -1  13-98.4329 262.389   2
  17   1  13-211.641 314.149   2
  17  -1  14 3822.46 500.378   2
  17   1  14 4627.69 551.765   2
  17  -1  15 2957.37 454.412   2
  17   1  15 2858.41 462.860   2
  17  -1  16 6639.13 613.095   2
  17   1  16 6504.26 644.045   2
  17  -1  17-144.511 213.371   2
  17   1  17-169.818 221.179   2
  17   1  18 7955.86 619.286   2
  17   1  19 24753.4 975.677   2
 -17  -3   0 37.2901 148.209   1
 -17  -3   1 16912.9 722.596   1
 -17  -3  -1 17318.7 715.286   1
 -17  -3   2 448.110 142.430   1
 -17  -3  -2 659.312 161.855   1
 -17  -3  -3 6914.24 465.507   1
 -17  -3   3 6160.33 443.478   1
 -17  -3   4 61520.0 1455.00   1
 -17  -3   5 82732.1 1734.61   1
 -17  -3   6 22287.0 932.186   1
 -17  -3   7 26840.5 1068.77   1
 -17  -3   8 43427.6 1425.79   1
  17   3   8 42695.9 1403.97   2
  17   3   9 3892.88 580.032   4
 -17  -3   9 3505.59 439.550   1
  17   3   9 3159.32 429.560   2
  17  -3   9 2576.75 360.165   2
  17  -3  10 11136.4 751.476   2
  17   3  10 11958.9 836.072   2
 -17  -3  10 12336.8 855.529   1
  17  -3  11 318.746 206.747   2
  17   3  11 247.152 225.390   2
 -17  -3  11 354.299 211.918   1
  17  -3  12 11328.0 793.134   2
  17   3  12 12223.7 889.189   2
  17  -3  13-112.105 216.045   2
  17   3  13-314.388 299.976   2
  17  -3  14 9935.81 754.967   2
  17   3  14 10296.6 837.275   2
  17   3  15 2795.72 446.633   2
  17   3  16 8696.82 773.255   2
  17   3  17 9298.47 745.063   2
  17   3  18 3762.18 432.731   2
  17   3  19 6517.65 518.191   2
 -17  -5   0 3877.53 359.667   1
 -17  -5   1 7857.52 538.040   1
 -17  -5  -1 7446.73 486.190   1
 -17  -5   2 1199.52 234.193   1
 -17  -5  -2 1299.86 248.706   1
 -17  -5  -3 323495. 3085.78   1
 -17  -5   3 322171. 3577.20   1
 -17  -5   4 85745.8 1891.46   1
 -17  -5  -4 88011.6 1641.91   1
 -17  -5   5 159791. 2641.09   1
 -17  -5   6 114023. 2304.89   1
 -17  -5   7 30323.4 1219.85   1
  17   5   8 12806.3 963.311   4
 -17  -5   8 13085.5 840.810   1
  17   5   8 12957.8 797.314   2
  17   5   9 669.852 330.328   4
  17   5   9 206.734 174.178   2
  17   5  10 6308.79 775.958   4
 -17  -5  10 4386.05 527.830   1
  17   5  10 5957.01 603.349   2
 -17  -5  11-1.33312 192.761   1
  17   5  11 172.229 248.408   2
  17   5  12 19668.7 1125.37   2
 -17  -5  12 15451.3 1099.56   1
  17   5  13 2001.73 388.617   2
  17   5  14 70377.0 2141.69   2
  17   5  15 23576.7 1262.97   2
  17   5  16 58926.1 1903.61   2
  17   5  17 14722.3 917.587   2
  17   5  18 2859.19 374.029   2
  17   5  19-214.915 172.152   2
 -17  -7   0 572.942 212.490   1
 -17  -7  -1 2144.60 307.050   1
 -17  -7   1 2133.17 347.455   1
 -17  -7   2 11131.7 749.793   1
 -17  -7  -2 9287.95 574.642   1
 -17  -7   3 103063. 2203.43   1
 -17  -7  -3 102282. 1831.89   1
 -17  -7   4 62734.0 1754.68   1
 -17  -7   5 132338. 2601.23   1
 -17  -7   6 122545. 2563.45   1
  17   7   6 113369. 2407.45   4
  17   7   7 31885.1 1358.41   4
 -17  -7   7 33028.0 1384.15   1
  17   7   7 32786.8 1235.00   2
  17   7   8 1784.85 373.875   4
  17   7   8 1330.04 272.137   2
 -17  -7   8 1810.64 384.863   1
 -17  -7   9 1783.50 351.752   1
  17   7   9 2075.50 356.543   2
  17   7  10 15067.4 1079.77   4
 -17  -7  10 11988.0 922.944   1
  17   7  10 13243.9 872.167   2
  17   7  11 27.6452 292.146   4
 -17  -7  11-410.345 331.081   1
  17   7  11-257.836 250.765   2
  17   7  12 13141.0 1082.94   4
  17   7  12 10778.8 811.506   2
  17   7  13 3717.02 519.452   2
  17   7  14 88811.1 2391.64   2
  17   7  15 27395.2 1328.40   2
  17   7  16 66972.3 1955.24   2
  17   7  17 12221.2 803.788   2
  17   7  18 43.8529 158.713   2
 -17  -9   0 337.047 261.504   1
 -17  -9  -1 24525.3 1069.86   1
 -17  -9   1 26156.0 1198.38   1
 -17  -9  -2 1830.47 279.472   1
 -17  -9   2 2665.99 462.886   1
  17   9   3 36901.9 1186.89   4
 -17  -9   3 45792.0 1626.46   1
  17   9   4 10689.3 667.937   4
 -17  -9   4 12146.4 867.903   1
  17   9   5 32641.1 1225.37   4
  17  -9   5 29429.8 1322.07   3
  17   9   6 11230.2 749.338   4
  17   9   6 11749.8 758.764   2
 -17  -9   6 12325.4 887.989   1
  17   9   7 12952.9 841.257   4
  17   9   7 11998.5 784.269   2
 -17  -9   7 12246.7 926.127   1
 -17  -9   8 9670.28 840.937   1
  17   9   8 10284.2 804.888   4
  17   9   8 10882.5 772.424   2
  17   9   9 192.926 226.435   4
  17  -9   9-10.2654 197.229   1
  17   9   9 203.200 204.110   2
 -17  -9   9 117.100 212.735   1
 -17  -9  10 2321.87 438.108   1
  17   9  10 2364.21 443.420   4
  17   9  10 2814.67 448.102   2
  17   9  11 184.293 252.334   4
 -17  -9  11-132.976 251.894   1
  17   9  11 179.289 192.981   2
  17   9  12 29009.7 1475.28   4
  17   9  12 32013.3 1429.19   2
  17   9  13 471.728 272.252   4
  17   9  13 72.5367 226.799   2
  17   9  14 43786.7 1650.56   2
  17   9  15 10498.9 800.604   2
  17   9  16 14547.5 883.744   2
  17   9  17 1812.84 277.923   2
  17   9  18 289.118 126.726   2
 -17 -11   0 2019.79 436.508   1
 -17 -11   1 145486. 3061.69   1
 -17 -11  -1 153601. 2963.71   1
 -17 -11  -2 6185.63 596.715   1
  17  11   2 5150.92 471.282   4
 -17 -11   2 5745.83 667.024   1
  17  11   3 13672.4 766.231   4
 -17 -11   3 14951.8 1016.31   1
  17  11   4 139.181 137.041   2
  17  11   4 77.2012 136.078   4
  17  11   5 20092.2 979.501   4
  17  11   5 17708.5 938.697   2
 -17 -11   5 18598.9 1158.34   1
  17  11   6 3147.58 413.128   4
 -17 -11   6 3313.56 536.321   1
  17  11   6 2991.39 404.876   2
  17  11   7 128.384 172.375   4
 -17 -11   7 159.751 233.957   1
  17  11   7 43.1118 174.856   2
  17  11   8 10350.4 783.078   4
  17  11   8 10916.5 802.631   2
 -17 -11   8 9512.20 875.934   1
  17  11   9 9887.27 793.326   4
 -17 -11   9 8238.37 843.572   1
  17 -11   9 6762.09 770.884   1
  17  11   9 9070.60 765.679   2
  17  11  10 82045.1 2281.73   4
  17  11  10 86948.2 2309.66   2
  17  11  11 780.859 314.878   4
  17  11  11 879.302 316.481   2
  17  11  12 47321.8 1784.55   4
  17  11  12 49938.6 1757.23   2
  17  11  13 504.536 329.129   4
  17  11  13 148.237 191.727   2
  17  11  14 64.3375 174.418   2
  17  11  15 239.597 170.800   2
  17  11  16 2540.77 368.606   2
  17  11  17-307.844 188.077   2
 -17 -13   0 908.475 323.145   1
 -17 -13   1 83619.8 2503.34   1
 -17 -13  -1 84930.2 2431.84   1
  17  13   2 1779.69 318.368   4
 -17 -13   2 2416.12 511.939   1
  17  13   3 1899.27 322.926   4
 -17 -13   3 2426.09 516.027   1
  17  13   4 656.599 247.515   4
 -17 -13   4 1320.74 424.738   1
  17  13   5 267.282 223.794   4
 -17 -13   5 558.512 337.111   1
  17 -13   5 142.289 218.324   3
  17  13   6 84.6399 169.396   4
 -17 -13   6-3.06711 215.934   1
  17  13   6-5.84823 161.300   2
  17  13   7 245.984 169.213   4
 -17 -13   7 473.108 249.113   1
  17  13   7 389.060 175.283   2
  17  13   8 18763.3 1047.18   4
  17  13   8 20235.3 1077.54   2
 -17 -13   8 17060.8 1227.90   1
  17  13   9 9244.71 781.156   4
  17  13   9 9884.58 785.233   2
  17  13  10 96375.7 2429.10   4
  17  13  10 99246.4 2424.54   2
  17  13  11 1293.09 371.659   4
  17  13  11 1376.60 342.014   2
  17  13  12 18542.7 1097.69   4
  17  13  12 18061.4 1040.46   2
  17  13  13 377.514 226.190   4
  17  13  13 406.506 198.979   2
  17  13  14 2378.97 393.394   2
  17  13  15 1696.20 248.809   2
  17  13  16 997.726 207.406   2
  17  15   1 13452.6 827.041   4
 -17 -15   1 11464.0 1042.82   1
  17  15   2 1318.35 307.257   4
 -17 -15   2 1822.22 498.718   1
  17  15   3 7383.04 647.248   4
 -17 -15   3 6248.89 787.469   1
  17  15   4 7692.22 659.910   4
 -17 -15   4 6103.85 769.876   1
  17  15   5 7853.96 673.997   4
 -17 -15   5 6767.52 833.062   1
  17  15   6 2548.36 409.084   4
  17  15   7 10720.3 771.563   4
  17  15   8 25938.2 1221.32   4
  17  15   9 4080.68 506.673   4
  17  15  10 16023.9 972.488   4
  17  15  10 16874.8 969.314   2
  17  15  11 381.010 200.915   4
  17  15  11 352.032 200.743   2
  17  15  12 5153.30 567.014   4
  17  15  12 5279.87 537.491   2
  17  15  13-52.6411 181.968   4
  17  15  13 290.259 200.759   2
  17  15  14 101.771 133.974   2
  17  17   0 934.154 265.699   4
  17  17   1 2233.10 381.228   4
  17  17   2-38.3504 172.581   4
  17  17   3 36090.8 1414.11   4
  17  17   4 16030.4 958.481   4
  17  17   5 32060.2 1353.40   4
  17  17   6 42777.6 1577.74   4
  17  17   7 15723.6 961.887   4
  17  17   8 13144.5 875.084   4
  17  17   9-501.486 287.047   4
  17  17  10 929.163 203.420   4
  17  17  11 103.182 187.226   4
  17  17  12-243.400 204.455   4
  17  17  13 33.2512 133.454   4
  17  19   0 721.244 250.992   4
  17  19   1 7525.14 653.051   4
  17  19  -1 7653.62 634.275   4
  17  19   2 388.446 196.921   4
  17  19  -2 697.502 239.425   4
  17  19   3 15485.2 947.603   4
  17  19   4 15557.8 949.157   4
  17  19   5 67789.3 1921.86   4
  17  19   6 45557.5 1548.93   4
  17  19   7 10493.8 761.929   4
  17  19   8 1329.47 263.414   4
  17  19   9 140.007 211.594   4
  17  19  10 5773.67 529.033   4
  17  19  11 171.507 138.719   4
  17 -19 -11-467.461 278.176   3
  17  21   0-168.181 197.968   4
  17  21   1 562.580 214.298   4
  17  21  -1 360.707 154.724   4
  17  21   2-331.377 221.336   4
  17  21  -2 211.366 181.710   4
  17  21   3 11099.3 746.204   4
  17  21  -3 11268.9 717.288   4
  17 -21   3 11677.0 1113.99   3
  17  21   4 6098.85 564.516   4
  17  21  -4 6616.94 569.638   4
  17  21   5 12804.7 776.355   4
  17  21  -5 14904.1 807.602   4
  17  21   6 7894.12 606.367   4
  17  21   7 1427.07 268.454   4
  17  21   8 903.288 231.506   4
  17  21   9-86.5701 134.836   4
  17  23   0 493.840 217.221   4
  17  23   1 16991.3 813.381   4
  17  23  -1 17885.9 845.993   4
  17  23   2 1893.70 297.887   4
  17  23  -2 1374.48 261.558   4
  17  23   3 3475.96 385.842   4
  17  23  -3 3841.64 398.709   4
  17  23   4 294.435 175.972   4
  17  23  -4 244.774 117.946   4
  17  23   5 224.776 126.727   4
  17  23  -5-162.578 151.328   4
  17  23   6-60.8888 127.508   4
  17  23  -6 89.0157 104.028   4
 -18   0   0 455638. 3972.73   1
 -18   0   1 1249.17 225.189   1
 -18   0   2 3846.79 364.858   1
 -18   0   3 504.812 164.069   1
 -18   0   4 22453.8 872.424   1
 -18   0   5 1947.97 289.522   1
 -18   0   6 690.247 197.174   1
 -18   0   7 18213.2 867.649   1
 -18   0   8 8623.40 633.033   1
 -18   0   9 137700. 2667.81   1
  18   0   9 137800. 2616.39   2
 -18   0  10 3344.52 468.698   1
  18   0  10 3309.59 467.175   2
 -18   0  11 48196.6 1793.49   1
  18   0  11 51489.8 1720.53   2
  18   0  12 1042.02 323.477   2
  18   0  13 2183.99 347.990   2
  18   0  14 4189.64 519.653   2
  18   0  15 24136.3 1228.20   2
  18   0  16 10046.2 763.300   2
  18   0  17-68.6784 200.717   2
  18   0  18 9652.26 651.994   2
 -18  -2   0 7825.92 508.019   1
 -18  -2  -1 1539.52 244.377   1
 -18  -2   1 1703.03 267.482   1
 -18  -2  -2 16145.0 738.293   1
 -18  -2   2 15925.5 741.016   1
 -18  -2   3 664.621 225.412   1
 -18   2   3-30.8926 208.029   1
 -18   2   4 59422.9 1531.26   1
 -18  -2   4 60869.3 1456.60   1
 -18  -2   5 1102.52 246.225   1
 -18   2   5 1067.30 218.027   1
 -18  -2   6 1719.85 306.154   1
 -18   2   6 1204.22 222.514   1
 -18   2   7 10902.5 710.960   1
 -18  -2   7 11384.6 715.897   1
  18   2   8 17365.3 897.384   2
 -18   2   8 15943.6 918.468   1
 -18  -2   8 17072.9 906.920   1
  18  -2   8 15479.5 845.562   2
  18  -2   9 88143.7 2045.70   2
  18   2   9 89461.7 2127.81   2
 -18   2   9 88696.9 2290.85   1
 -18  -2   9 90724.2 2178.20   1
 -18  -2  10 9638.10 757.747   1
  18  -2  10 10260.6 746.239   2
  18   2  10 9434.72 734.326   2
 -18  -2  11 59996.4 1986.13   1
  18  -2  11 60801.1 1815.37   2
  18   2  11 61808.3 1909.74   2
  18  -2  12 92.0787 183.166   2
  18   2  12 534.387 261.555   2
  18  -2  13 10724.6 795.815   2
  18   2  13 11772.8 878.418   2
  18  -2  14 581.881 224.742   2
  18   2  14-26.7496 270.823   2
  18  -2  15 418.777 215.366   2
  18   2  15 423.030 212.280   2
  18  -2  16 139.308 163.920   2
  18   2  16 234.239 231.669   2
  18   2  17 1168.44 301.487   2
  18   2  18 10287.3 698.088   2
  18   2  19 4469.65 421.722   2
 -18  -4   0 874.698 180.842   1
 -18  -4  -1 693.845 206.764   1
 -18  -4   1 223.589 180.614   1
 -18  -4  -2 6581.73 462.737   1
 -18  -4   2 5517.76 434.589   1
 -18  -4   3 30547.9 1070.40   1
 -18  -4  -3 29949.3 989.641   1
 -18  -4   4 111335. 2082.58   1
 -18  -4   5 95408.2 1979.35   1
 -18  -4   6 53892.7 1537.09   1
 -18  -4   7 46824.1 1479.04   1
 -18  -4   8 12140.2 794.562   1
  18   4   8 10891.3 726.179   2
  18  -4   9 127.319 138.607   2
  18   4   9 38.5268 155.873   2
 -18  -4  10 135.637 184.053   1
  18  -4  10-6.33361 146.172   2
  18   4  10-5.22744 173.643   2
 -18  -4  11 1760.86 393.675   1
  18   4  11 1677.21 352.625   2
 -18  -4  12 820.324 295.282   1
  18   4  12 676.981 262.734   2
  18   4  13 12179.0 895.599   2
  18   4  14 4446.16 563.959   2
  18   4  15 32784.1 1468.78   2
  18   4  16 13482.8 930.154   2
  18   4  17 13666.0 875.610   2
  18   4  18 4615.86 464.944   2
  18   4  19 375.301 136.918   2
 -18  -6   0 455.557 151.283   1
 -18  -6   1 525.724 180.234   1
 -18  -6  -1 287.489 138.418   1
 -18  -6   2 62572.0 1662.48   1
 -18  -6  -2 59561.0 1435.18   1
 -18  -6   3 23192.3 1029.00   1
 -18  -6  -3 21098.9 841.766   1
 -18  -6   4 192132. 3018.79   1
 -18  -6   5 97424.8 2180.47   1
 -18  -6   6 122985. 2514.71   1
  18   6   7 75349.4 2209.18   4
 -18  -6   7 75829.1 2049.13   1
  18   6   8-254.987 224.555   2
  18   6   8 384.889 314.866   4
 -18  -6   8-153.947 225.566   1
  18   6   9 7197.06 759.282   4
 -18  -6   9 5197.22 586.136   1
  18   6   9 6401.37 586.504   2
  18   6  10 1289.57 443.994   4
 -18  -6  10 339.012 176.444   1
  18   6  10 906.182 301.343   2
  18   6  11-177.318 254.136   2
 -18  -6  11-359.898 324.473   1
  18   6  12-536.835 324.414   2
 -18  -6  12 276.386 173.244   1
  18   6  13 40761.0 1632.74   2
  18   6  14 7117.67 698.714   2
  18   6  15 136130. 2931.39   2
  18   6  16 39593.1 1538.24   2
  18   6  17 20586.8 1041.94   2
  18   6  18 1406.70 237.052   2
 -18  -8   0 4964.91 503.538   1
 -18  -8  -1 1906.60 299.783   1
 -18  -8   1 1979.94 367.516   1
 -18  -8   2 27842.5 1203.25   1
 -18  -8  -2 26057.7 1017.70   1
 -18  -8   3 10608.0 777.515   1
 -18  -8  -3 9468.62 609.500   1
 -18  -8   4 113204. 2496.05   1
  18  -8   4 97501.4 2349.53   3
  18   8   5 59188.5 1652.93   4
  18  -8   5 56221.7 1857.49   3
 -18  -8   6 58361.7 1854.52   1
  18   8   6 53832.5 1660.09   4
  18   8   7 43245.3 1590.34   4
 -18  -8   7 42086.5 1631.94   1
  18   8   7 41958.0 1440.75   2
 -18  -8   8 672.821 249.734   1
  18   8   8 953.141 309.249   4
  18   8   8 906.757 272.096   2
  18   8   9 6963.67 727.634   4
 -18  -8   9 5925.85 657.655   1
  18   8   9 6584.42 626.723   2
  18   8  10 496.940 288.255   4
 -18  -8  10 42.1369 224.016   1
  18   8  10 385.351 232.435   2
  18   8  11 328.253 276.814   4
 -18  -8  11-288.514 280.812   1
  18   8  11-44.1852 259.701   2
  18   8  12 589.883 343.143   4
  18   8  12 266.696 268.454   2
  18   8  13 32115.1 1419.98   2
  18   8  14 8466.20 751.191   2
  18   8  15 67287.5 1989.41   2
  18   8  16 16658.5 974.457   2
  18   8  17 7786.67 604.229   2
  18   8  18 50.1367 150.758   2
 -18 -10   0 204969. 3375.88   1
 -18 -10   1 1234.06 352.253   1
 -18 -10  -1 743.492 260.761   1
 -18 -10  -2 29826.8 1204.00   1
 -18 -10   2 28632.2 1333.99   1
  18  10   3 1899.60 296.216   4
 -18 -10   3 2357.87 448.532   1
  18  10   4 7461.54 572.066   4
  18 -10   4 7377.53 686.467   3
 -18 -10   4 7808.03 738.661   1
  18  10   5 210.232 175.667   2
  18  10   5-171.074 140.824   4
 -18 -10   5 233.620 245.520   1
  18 -10   5-37.7051 221.442   3
  18  10   6 204.972 200.020   2
  18  10   6-82.3057 177.772   4
 -18 -10   6 276.624 212.127   1
  18  10   7 2146.96 366.646   4
 -18 -10   7 1718.93 377.471   1
  18  10   7 2035.25 370.480   2
  18  10   8 2420.06 403.895   4
 -18 -10   8 1685.80 408.175   1
  18  10   8 1592.05 321.981   2
  18  10   9 20396.2 1134.85   4
 -18 -10   9 17304.1 1183.06   1
  18  10   9 19644.5 1081.78   2
  18  10  10 5188.64 644.592   4
 -18 -10  10 3634.39 559.589   1
  18  10  10 5026.35 572.665   2
  18  10  11 60204.5 2038.30   4
  18  10  11 64358.7 1994.96   2
  18  10  12 189.696 256.667   4
  18  10  12 13.3746 221.809   2
  18  10  13 24901.8 1313.87   4
  18  10  13 25130.9 1253.47   2
  18  10  14 3454.36 475.799   2
  18  10  15 5270.60 558.141   2
  18  10  16 250.129 192.113   2
  18  10  17-49.9112 145.519   2
 -18 -12   0 131358. 2957.27   1
 -18 -12  -1 5850.19 653.808   1
 -18 -12   1 5816.40 672.203   1
  18  12   2 43924.1 1377.42   4
 -18 -12   2 39537.8 1702.53   1
  18  12   3 7592.47 614.038   4
 -18 -12   3 7596.99 790.421   1
  18  12   4 1745.69 303.301   2
  18  12   4 2364.48 361.321   4
 -18 -12   4 2301.14 448.221   1
  18  12   5 8163.26 648.979   4
  18  12   5 7601.18 629.692   2
  18 -12   5 7717.02 743.345   3
 -18 -12   5 7761.66 808.017   1
  18  12   6 8349.82 678.659   4
  18  12   6 8794.64 703.585   2
 -18 -12   6 8647.09 843.817   1
  18  12   7 2195.26 375.595   4
 -18 -12   7 2287.05 484.813   1
  18  12   7 1912.86 365.625   2
 -18 -12   8 5158.56 687.647   1
  18  12   8 5326.72 592.969   4
  18  12   8 5319.48 569.834   2
  18  12   9 68766.3 2015.30   4
  18  12   9 68802.5 2046.90   2
  18  12  10 3806.20 541.090   4
  18  12  10 3950.82 525.110   2
  18  12  11 78851.0 2256.39   4
  18  12  11 81426.9 2212.71   2
  18  12  12 443.408 300.677   4
  18  12  12 379.695 215.039   2
  18  12  13 4463.74 517.196   2
  18  12  13 4083.43 532.687   4
  18  12  14-372.675 241.660   2
  18  12  15 9342.52 689.708   2
  18  12  16 1873.99 272.023   2
 -18 -14   0 37096.2 1713.90   1
  18  14   1 336.633 203.660   4
 -18 -14   1-40.1669 206.560   1
  18  14   2 30285.7 1239.51   4
 -18 -14   2 28106.0 1554.44   1
  18  14   3 342.962 189.828   4
 -18 -14   3 155.777 215.603   1
  18  14   4 3274.76 460.342   4
 -18 -14   4 2518.99 494.739   1
  18  14   5 2497.70 404.125   4
 -18 -14   5 1845.06 474.813   1
  18 -14   5 2075.97 435.257   3
  18  14   6 36.2736 222.895   4
 -18 -14   6 194.922 196.439   1
  18  14   7 7859.07 664.714   4
  18  14   8 7080.46 651.496   4
  18  14   8 7690.87 669.446   2
  18  14   9 51076.9 1753.25   4
  18  14   9 50025.1 1699.29   2
  18  14  10 1986.91 372.433   4
  18  14  10 2925.20 456.533   2
  18  14  11 22715.1 1188.92   4
  18  14  11 23517.7 1170.12   2
  18  14  12 144.880 222.600   4
  18  14  12 280.671 182.205   2
  18  14  13 759.578 267.288   4
  18  14  13 701.581 222.170   2
  18  14  14 305.955 190.477   2
  18  14  15 1404.25 244.533   2
  18  16   0 3401.74 434.717   4
  18  16   1 963.458 277.078   4
 -18 -16   1 1132.17 433.650   1
  18  16   2 67.6011 194.464   4
 -18 -16   2 236.833 267.977   1
  18  16   3 2738.98 424.576   4
 -18 -16   3 1986.39 491.908   1
  18  16   4 22426.2 1127.66   4
  18  16   5 8940.44 722.656   4
  18  16   6 25252.2 1204.61   4
  18  16   7 20783.8 1088.16   4
  18  16   8 4229.31 488.550   4
  18  16   9 6078.62 591.753   4
  18  16  10-312.155 290.012   4
  18  16  11 1048.72 274.127   4
  18  16  12 52.4734 165.417   4
  18  16  13 201.989 156.888   4
  18  18   0 5554.19 558.172   4
  18  18   1 605.119 188.375   4
  18  18  -1 694.654 229.257   4
  18  18   2 839.987 277.377   4
  18  18   3 2304.00 382.016   4
  18  18   4 40537.9 1506.15   4
  18 -18   4 37674.0 1859.93   3
  18  18   5 47819.8 1648.04   4
  18  18   6 39161.9 1476.22   4
  18  18   7 36244.2 1415.74   4
  18  18   8 371.766 175.956   4
  18  18   9 1200.72 275.339   4
  18  18  10 627.329 226.135   4
  18  18  11 5074.79 507.986   4
  18 -18 -11 3312.39 479.956   3
  18  18  12-243.545 183.064   4
  18  20   0 16151.1 921.932   4
  18  20   1-216.548 233.592   4
  18  20  -1 125.936 181.650   4
  18  20   2 1836.92 331.460   4
  18  20  -2 1650.24 318.617   4
  18  20   3 3657.72 451.974   4
  18  20  -3 3685.30 440.384   4
  18 -20   3 4123.88 694.947   3
  18  20   4 37013.6 1374.16   4
  18  20   5 22499.0 1062.14   4
  18  20   6 18328.3 952.321   4
  18  20   7 7056.34 594.079   4
  18  20   8-28.3191 136.226   4
  18  20   9 1031.55 230.751   4
  18  20  10 22.6975 124.110   4
  18 -20 -10-534.721 351.789   3
  18  22   0 7108.86 578.600   4
  18  22   1-66.5694 173.453   4
  18  22  -1 64.8816 134.597   4
  18 -22   1 49.2114 302.618   3
  18  22   2 7436.76 566.164   4
  18  22  -2 7966.41 583.045   4
  18 -22   2 7950.89 898.072   3
  18  22   3 1121.88 262.362   4
  18  22  -3 910.436 228.539   4
  18  22   4 3919.97 423.372   4
  18  22  -4 4365.62 425.164   4
  18  22   5 849.862 224.737   4
  18  22  -5 773.836 196.177   4
  18  22   6 296.814 158.073   4
  18  22  -6 217.797 127.607   4
  18  22   7 805.975 182.061   4
  18  22  -7 900.798 182.499   4
 -19  -1   0 1896.49 291.309   1
 -19  -1  -1 116044. 2075.96   1
 -19  -1   1 113238. 1985.18   1
 -19   1   1 112769. 2111.41   1
 -19  -1   2 894.438 212.357   1
 -19   1   2 729.657 170.829   1
 -19   1   3 5531.01 475.697   1
 -19  -1   3 5681.49 471.318   1
 -19  -1   4 575.783 185.180   1
 -19   1   4 598.571 183.892   1
 -19  -1   5 7085.35 528.920   1
 -19   1   5 7003.48 525.365   1
 -19  -1   6 11306.0 686.739   1
 -19   1   6 11265.3 683.739   1
 -19  -1   7 3617.90 406.499   1
  19   1   7 2520.33 360.426   3
 -19   1   7 3694.10 414.271   1
 -19   1   8 49547.5 1590.49   1
 -19  -1   8 49132.3 1544.37   1
 -19   1   9 12205.7 847.201   1
 -19  -1   9 12273.8 825.021   1
  19  -1   9 12099.8 792.889   2
  19   1   9 11508.3 775.675   2
 -19  -1  10 108289. 2560.95   1
 -19   1  10 109612. 2707.04   1
  19  -1  10 106010. 2370.64   2
  19   1  10 106729. 2420.52   2
 -19  -1  11 1491.77 337.428   1
  19  -1  11 2082.51 382.353   2
  19   1  11 1532.18 374.833   2
  19  -1  12 18532.9 1053.51   2
  19   1  12 19742.3 1127.91   2
  19  -1  13-135.837 254.999   2
  19   1  13-448.234 342.026   2
  19  -1  14 2836.62 416.406   2
  19   1  14 2116.19 369.233   2
  19  -1  15 2652.59 421.839   2
  19   1  15 2385.48 413.684   2
  19  -1  16 11521.2 792.836   2
  19   1  16 11742.4 843.568   2
  19  -1  17-442.111 223.642   2
  19   1  17 112.199 198.897   2
  19   1  18 5090.60 479.853   2
 -19  -3   0 262.331 158.503   1
 -19  -3  -1 203.408 143.482   1
 -19  -3   1 345.363 194.935   1
 -19  -3   2 805.725 243.844   1
 -19  -3  -2 477.918 153.631   1
 -19  -3  -3 84757.7 1809.44   1
 -19  -3   3 82483.4 1769.50   1
 -19  -3   4 23048.4 941.886   1
 -19  -3   5 40453.4 1283.37   1
 -19  -3   6 36172.7 1252.57   1
 -19  -3   7 4674.95 475.364   1
  19   3   8 30623.0 1214.78   2
 -19  -3   8 31674.5 1284.81   1
 -19  -3   9 2133.48 381.744   1
  19  -3   9 2083.37 352.717   2
  19   3   9 1769.54 343.550   2
  19  -3  10 4777.32 511.707   2
  19   3  10 4590.54 532.411   2
 -19  -3  10 5308.13 591.920   1
 -19  -3  11 341.013 214.652   1
  19  -3  11 569.758 233.592   2
  19   3  11 932.813 300.220   2
  19  -3  12 6964.12 622.863   2
  19   3  12 7603.73 711.764   2
  19  -3  13 343.053 190.162   2
  19   3  13 9.73348 264.081   2
  19  -3  14 2382.97 385.263   2
  19   3  14 2353.86 403.115   2
  19   3  15 455.770 249.607   2
  19   3  16 5295.56 600.913   2
  19   3  17 2708.35 396.393   2
  19   3  18 3601.77 410.729   2
 -19  -5   0 1058.81 201.281   1
 -19  -5   1 7210.62 534.050   1
 -19  -5  -1 7386.66 544.149   1
 -19  -5   2 4675.35 417.855   1
 -19  -5  -2 4215.24 403.036   1
 -19  -5   3 90771.4 1973.48   1
 -19  -5  -3 93611.4 1805.14   1
 -19  -5   4 41894.6 1364.95   1
 -19  -5   5 109860. 2245.89   1
 -19  -5   6 87345.7 2070.07   1
 -19  -5   7 34769.8 1342.03   1
  19  -5  -7 30555.6 1231.43   3
  19   5   8 3608.35 433.189   2
 -19  -5   8 3739.18 463.693   1
 -19  -5   9 388.224 150.915   1
  19   5   9 890.150 251.543   2
 -19  -5  10 3420.64 476.722   1
  19   5  10 5186.89 730.648   4
  19   5  10 4276.06 491.835   2
 -19  -5  11 263.830 243.194   1
  19   5  11 141.166 194.491   2
  19   5  12 2628.14 416.567   2
 -19  -5  12 1915.65 405.661   1
  19   5  13-180.765 329.568   2
  19   5  14 48568.8 1780.34   2
  19   5  15 20842.3 1189.62   2
  19   5  16 50398.4 1730.10   2
  19   5  17 14722.5 893.893   2
  19   5  18 885.305 193.715   2
 -19  -7   0 1603.43 287.444   1
 -19  -7   1 23.4681 178.156   1
 -19  -7  -1 90.0084 162.823   1
 -19  -7   2 363.561 192.926   1
  19  -7   2-65.9588 195.096   3
 -19  -7  -2-162.833 181.298   1
 -19  -7   3 56819.1 1701.41   1
 -19  -7  -3 55688.7 1449.32   1
 -19  -7   4 41435.2 1485.92   1
  19  -7   4 35959.9 1458.58   3
 -19  -7   5 135996. 2709.27   1
  19  -7   5 115930. 2708.62   3
 -19  -7   6 99642.4 2382.78   1
  19   7   7 31782.1 1428.89   4
 -19  -7   7 30560.8 1350.88   1
  19   7   7 31433.0 1235.72   2
  19   7   8 1404.86 351.922   4
 -19  -7   8 963.555 278.940   1
  19   7   8 1142.97 280.406   2
  19   7   9 1461.43 358.498   4
 -19  -7   9 766.584 231.396   1
  19   7   9 1465.42 307.174   2
 -19  -7  10 17154.0 1137.67   1
  19   7  10 18756.5 1055.19   2
  19   7  11-62.1968 268.323   4
  19   7  11 64.8358 197.658   2
 -19  -7  11-330.227 305.880   1
  19   7  12 6877.65 652.742   2
  19   7  13 1113.44 292.573   2
  19   7  14 80426.1 2254.91   2
  19   7  15 26484.8 1278.97   2
  19   7  16 56939.9 1763.79   2
  19   7  17 11992.8 771.937   2
  19   7  18 80.8245 149.800   2
 -19  -9   0 220.147 156.752   1
 -19  -9   1 24643.2 1175.18   1
 -19  -9  -1 24392.3 1087.41   1
  19   9   2 3984.27 393.561   4
 -19  -9  -2 5368.65 489.545   1
 -19  -9   3 16241.2 1006.22   1
  19   9   3 12650.4 716.862   4
 -19  -9   4 14846.8 970.793   1
  19   9   4 12421.2 748.539   4
  19  -9   4 13241.2 910.596   3
 -19  -9   5 35078.5 1490.03   1
  19   9   5 30868.3 1211.00   4
  19  -9   5 31883.3 1446.09   3
 -19  -9   6 14291.3 982.614   1
  19   9   6 13776.8 850.477   4
  19   9   6 13737.6 837.897   2
  19   9   7 3676.67 458.978   4
 -19  -9   7 3778.21 538.322   1
  19   9   7 3148.83 424.416   2
  19   9   8 5345.07 594.418   4
 -19  -9   8 4617.88 582.191   1
  19   9   8 5382.43 564.329   2
  19   9   9 146.478 253.446   4
 -19  -9   9 128.709 232.678   1
  19   9   9 313.791 263.067   2
  19   9  10 253.710 256.952   4
 -19  -9  10-72.9686 212.107   1
  19   9  10 111.728 197.438   2
  19   9  11 176.882 228.613   4
  19   9  11 589.731 284.251   2
  19   9  12 14880.8 1076.53   4
  19   9  12 13288.8 916.674   2
  19   9  13 1291.71 324.563   2
  19   9  14 21616.6 1149.70   2
  19   9  15 5093.38 559.123   2
  19   9  16 7764.95 635.345   2
  19   9  17 275.868 155.299   2
  19   9  18-120.866 150.331   2
 -19 -11   0 1013.89 308.644   1
 -19 -11   1 90290.7 2431.13   1
 -19 -11  -1 94940.3 2367.57   1
  19  11   2 618.932 199.200   4
 -19 -11   2 904.597 332.130   1
  19  11   3 6852.16 570.878   4
 -19 -11   3 7808.34 769.335   1
  19  11   4 369.780 169.745   4
 -19 -11   4 589.364 293.903   1
  19 -11   4 317.815 236.355   3
  19  11   5 8565.26 652.367   4
  19 -11   5 7409.26 743.319   3
  19  11   5 8975.29 674.961   2
 -19 -11   5 8675.83 820.989   1
 -19 -11   6 8920.06 835.132   1
  19  11   6 9703.36 701.891   4
  19  11   6 9083.68 693.781   2
  19  11   7-13.5579 174.231   4
 -19 -11   7 280.883 256.303   1
  19  11   7 194.664 167.306   2
  19  11   8 10605.9 800.809   4
 -19 -11   8 8077.90 824.795   1
  19  11   8 9950.94 768.208   2
  19  11   9 4520.05 559.220   4
 -19 -11   9 3612.60 574.824   1
  19  11   9 4820.40 563.802   2
  19  11  10 67021.6 2082.30   4
  19  11  10 68452.7 2049.57   2
  19  11  11 1150.92 372.116   4
  19  11  11 886.803 320.481   2
  19  11  12 33722.6 1493.98   4
  19  11  12 33278.3 1432.71   2
  19  11  13 217.809 202.524   4
  19  11  13 173.786 215.625   2
  19  11  14-36.3051 200.875   2
  19  11  15 1024.02 254.821   2
  19  11  16 3931.17 421.138   2
  19  11  17 138.925 143.037   2
 -19 -13   0 975.280 365.264   1
  19  13   1 48335.3 1478.74   4
 -19 -13   1 45270.5 1860.36   1
  19  13   2 4937.97 495.809   4
 -19 -13   2 4788.93 639.177   1
  19  13   3 7530.24 620.449   4
 -19 -13   3 6471.40 747.025   1
  19  13   4 159.015 150.536   4
 -19 -13   4 201.988 262.705   1
  19  13   5 12818.0 831.121   4
  19 -13   5 12035.4 938.131   3
 -19 -13   5 12136.7 1011.73   1
 -19 -13   6 11867.4 996.638   1
  19  13   6 11241.4 798.250   4
  19  13   6 11622.1 808.103   2
  19  13   7 208.127 177.673   4
  19  13   7 302.890 179.431   2
 -19 -13   7 532.794 282.490   1
  19  13   8 19385.2 1057.18   4
  19  13   8 19209.3 1065.68   2
  19  13   9 9673.99 775.582   4
  19  13   9 10320.8 798.956   2
  19  13  10 71027.9 2057.71   4
  19  13  10 71294.8 2069.26   2
  19  13  11 845.487 331.992   4
  19  13  11 924.910 312.677   2
  19  13  12 18340.4 1052.51   4
  19  13  12 18415.7 1034.29   2
  19  13  13-75.4730 197.536   4
  19  13  13-329.440 225.800   2
  19  13  14 2701.85 388.422   2
  19  13  15 790.362 212.391   2
  19  13  16 4839.41 434.303   2
  19  15   0-30.7573 168.966   4
 -19 -15   1 9790.35 966.263   1
  19  15   1 12579.2 795.646   4
  19  15   2 333.443 205.949   4
 -19 -15   2-107.198 231.168   1
  19  15   3 5643.29 575.836   4
 -19 -15   3 4610.15 677.193   1
  19  15   4 2984.34 407.570   4
 -19 -15   4 2330.16 482.237   1
  19 -15   4 2896.96 521.018   3
  19  15   5 4052.11 479.386   4
  19  15   6 7798.72 662.236   4
  19  15   7 2369.06 372.363   4
  19  15   8 16146.8 956.036   4
  19  15   9 2780.51 422.602   4
  19  15  10 9557.58 740.581   4
  19  15  10 9576.42 727.674   2
  19  15  11 265.018 172.204   4
  19  15  11 78.0917 155.746   2
  19  15  12 882.314 254.500   4
  19  15  12 846.709 239.657   2
  19  15  13-260.105 163.717   4
  19  15  13-89.0779 130.023   2
  19  15  14-312.333 187.548   2
  19  17   0-1.45358 174.593   4
  19  17   1 419.434 191.699   4
  19  17  -1 241.011 189.842   4
  19  17   2 345.667 237.714   4
  19  17   3 1099.15 316.662   4
  19  17   4 5779.87 590.879   4
  19 -17   4 4598.01 679.920   3
  19  17   5 48563.8 1650.83   4
  19  17   6 33247.7 1348.27   4
  19  17   7 12534.2 859.338   4
  19  17   8 5853.88 588.227   4
  19  17   9-245.449 249.410   4
  19  17  10 1444.61 285.106   4
  19  17  11 368.958 206.692   4
  19 -17 -11-332.990 276.264   3
  19  17  12 321.615 172.593   4
  19  19   0-30.0372 177.613   4
  19  19   1 9727.05 739.023   4
  19  19  -1 10245.1 727.512   4
  19  19   2 328.713 168.429   4
  19  19  -2 174.177 166.975   4
  19  19   3 15348.8 929.277   4
  19  19  -3 17459.3 925.704   4
  19 -19   3 17109.7 1308.11   3
  19  19   4 15419.4 930.302   4
  19  19   5 49947.9 1615.92   4
  19  19   6 37683.6 1383.82   4
  19  19   7 7152.79 620.327   4
  19  19   8 808.340 238.544   4
  19  19   9 379.101 185.205   4
  19  19  10 10427.4 675.874   4
  19 -19 -10 8817.70 841.726   3
  19  19  11 21.7703 136.494   4
  19  21   0 177.840 143.619   4
  19  21   1 81.4508 180.733   4
  19  21  -1-125.862 187.033   4
  19  21   2 712.107 194.940   4
  19  21  -2 599.532 208.214   4
  19 -21   2 599.008 392.692   3
  19  21   3 13817.8 798.189   4
  19  21  -3 13453.8 762.840   4
  19 -21   3 14580.9 1251.30   3
  19  21   4 6321.33 548.733   4
  19  21  -4 6358.25 514.748   4
  19  21   5 5828.48 515.317   4
  19  21  -5 5929.05 485.825   4
  19  21   6 2435.04 340.164   4
  19  21  -6 2716.60 335.960   4
  19  21   7 787.951 196.145   4
  19  21   8 87.8011 134.196   4
  19  23   0 418.600 166.650   4
  19 -23   0 151.202 247.722   3
  19  23   1 11172.7 642.512   4
  19  23  -1 12426.0 671.850   4
  19 -23   1 11429.8 971.158   3
  19 -23  -1 10312.9 833.265   3
  19  23   2 826.713 211.317   4
  19  23  -2 663.326 202.404   4
  19 -23  -2 288.279 220.952   3
  19  23   3 3159.41 336.970   4
  19  23  -3 3283.94 332.884   4
  19 -23  -3 2837.97 426.243   3
  19  23   4 27.1219 105.106   4
  19  23  -4-94.5808 134.926   4
  19 -23  -5-6.70343 245.312   3
 -20   0   0 448106. 4325.90   1
 -20   0   1 8719.70 601.613   1
 -20   0   2 3590.79 387.147   1
 -20   0   3 12146.3 681.521   1
 -20   0   4 963.649 206.224   1
 -20   0   5 40204.7 1265.91   1
 -20   0   6 68812.2 1706.56   1
  20   0   7 8467.00 655.596   3
 -20   0   7 11602.6 731.568   1
 -20   0   8 16938.5 931.834   1
  20   0   9 81509.6 2047.47   2
 -20   0   9 84995.8 2208.34   1
 -20   0  10 16878.8 1058.02   1
  20   0  10 16211.2 956.762   2
 -20   0  11 90705.2 2615.71   1
  20   0  11 98074.1 2400.43   2
  20   0  12 397.524 255.107   2
  20   0  13 6510.99 650.277   2
  20   0  14 679.193 216.469   2
  20   0  15 42395.7 1607.47   2
  20   0  16 13224.2 856.820   2
  20   0  17 1297.07 281.511   2
  20   0  18 4214.70 419.134   2
 -20  -2   0 82072.0 1751.47   1
 -20  -2   1 38.2881 149.039   1
 -20  -2  -1 68.9781 133.224   1
 -20  -2   2 802.515 238.840   1
 -20  -2  -2 479.642 131.880   1
 -20  -2   3 1806.60 310.703   1
 -20   2   4 1320.10 251.967   1
 -20  -2   4 1878.94 310.123   1
  20   2   5 2752.93 401.449   3
 -20   2   5 2573.18 335.601   1
 -20  -2   5 3251.99 390.589   1
  20   2   6 1188.82 258.944   3
 -20   2   6 1416.02 228.550   1
 -20   2   7 5083.27 526.811   1
 -20  -2   7 5472.84 521.767   1
 -20  -2   8 1905.64 351.717   1
 -20   2   8 1341.98 289.021   1
 -20  -2   9 28816.1 1289.91   1
  20  -2   9 28055.6 1201.41   2
  20   2   9 29271.5 1246.51   2
 -20  -2  10 553.746 241.291   1
  20  -2  10 479.129 243.225   2
  20   2  10 590.930 264.072   2
 -20  -2  11 6427.32 681.658   1
  20  -2  11 8043.62 679.750   2
  20   2  11 7637.99 702.062   2
  20  -2  12 137.330 189.872   2
  20   2  12 349.118 290.935   2
  20  -2  13 601.209 200.591   2
  20   2  13 808.963 194.770   2
  20  -2  14 1301.08 295.029   2
  20   2  14 1119.72 258.242   2
  20  -2  15 3629.98 469.947   2
  20   2  15 3790.45 517.125   2
  20   2  16 806.375 261.698   2
  20   2  17 132.803 156.641   2
  20   2  18 3555.86 402.064   2
 -20  -4   0 152424. 2409.83   1
 -20  -4  -1 509.000 178.927   1
 -20  -4   1 1198.55 256.940   1
 -20  -4  -2 76254.7 1689.66   1
 -20  -4   2 80379.7 1811.49   1
 -20  -4  -3 13198.7 736.329   1
  20   4   3 12718.8 846.707   3
 -20  -4   3 12715.4 726.144   1
  20   4   4 61556.5 1813.44   3
 -20  -4   4 60960.0 1623.68   1
  20  -4  -4 56154.9 1610.54   3
 -20  -4   5 20675.3 959.469   1
  20  -4  -5 19278.2 955.362   3
 -20  -4   6 32280.8 1244.74   1
  20  -4  -6 28580.9 1194.60   3
 -20  -4   7 19083.1 989.030   1
  20  -4  -7 16756.4 940.964   3
  20  -4   8 1014.32 224.949   2
  20   4   8 930.896 244.682   2
 -20  -4   8 1220.35 263.417   1
 -20  -4   9 551.959 246.663   1
  20  -4   9 265.569 140.696   2
  20   4   9 345.607 208.206   2
 -20  -4  10 312.373 222.422   1
  20  -4  10 157.958 172.471   2
  20   4  10 184.032 208.793   2
 -20  -4  11 391.381 219.774   1
  20   4  11 772.671 272.637   2
 -20  -4  12-137.616 167.906   1
  20   4  12-201.887 255.897   2
  20   4  13 9000.52 769.082   2
  20   4  14 528.974 219.452   2
  20   4  15 27953.3 1344.50   2
  20   4  16 11838.8 836.835   2
  20   4  17 3968.56 462.742   2
  20   4  18 774.723 197.009   2
 -20  -6   0 72813.3 1749.24   1
  20  -6   0 71905.1 1853.61   3
 -20  -6  -1 676.154 194.245   1
  20   6  -1 513.804 207.140   3
 -20  -6   1 144.680 181.175   1
  20  -6   1 169.978 198.698   3
 -20  -6   2-64.6913 197.847   1
 -20  -6  -2 55.5516 145.327   1
  20  -6   2 59.4966 216.624   3
 -20  -6  -3 11502.3 678.356   1
 -20  -6   3 11468.2 745.428   1
  20  -6   3 10819.9 809.485   3
 -20  -6   4 151520. 2741.89   1
  20  -6   4 144007. 2995.00   3
 -20  -6   5 74287.3 1958.87   1
  20  -6   5 60912.5 2016.28   3
 -20  -6   6 50733.0 1652.98   1
  20  -6   6 41414.9 1691.00   3
 -20  -6   7 51258.0 1720.19   1
  20  -6  -7 52223.6 1682.09   3
  20   6   8 865.335 241.003   2
 -20  -6   8 724.278 241.398   1
  20  -6  -8 761.690 229.052   3
 -20  -6   9 20510.4 1179.60   1
  20   6   9 20975.7 1077.84   2
  20   6  10 3326.79 578.263   4
  20   6  10 2785.45 440.232   2
 -20  -6  10 1852.31 353.758   1
  20   6  11 10186.4 800.159   2
 -20  -6  11 8734.70 849.141   1
  20   6  12-281.000 306.433   2
 -20  -6  12-63.3311 255.635   1
  20   6  13 4268.90 527.805   2
  20   6  14 7726.82 720.787   2
  20   6  15 67745.3 2020.92   2
  20   6  16 21369.3 1100.04   2
  20   6  17 13858.1 835.284   2
  20   6  18 212.580 131.201   2
 -20  -8   0 20546.7 1002.44   1
 -20  -8   1 402.560 178.351   1
 -20  -8  -1-85.2448 181.597   1
 -20  -8   2 753.075 218.068   1
  20  -8   2 790.428 279.172   3
 -20  -8  -2 256.921 128.951   1
 -20  -8   3 3389.14 459.054   1
  20  -8   3 2800.49 461.996   3
 -20  -8   4 54903.2 1785.31   1
  20  -8   4 52406.8 1846.04   3
 -20  -8   5 51123.4 1767.67   1
  20  -8   5 44992.3 1775.65   3
 -20  -8   6 59664.2 1931.48   1
  20  -8   6 51431.3 1943.80   3
  20   8   7 26918.4 1303.42   4
 -20  -8   7 26464.6 1319.70   1
  20   8   7 26733.2 1161.69   2
  20   8   8 193.922 208.968   4
 -20  -8   8-149.097 239.661   1
  20   8   8-74.8074 175.858   2
  20   8   9 10616.1 922.683   4
 -20  -8   9 8374.27 783.781   1
  20   8   9 10525.5 779.521   2
  20   8  10 72.2170 275.656   4
 -20  -8  10-119.483 219.385   1
  20   8  10 98.4670 207.062   2
  20   8  11-79.2095 253.751   2
 -20  -8  11-177.401 293.123   1
  20   8  12 58.7280 312.001   4
  20   8  12-125.405 263.731   2
  20   8  13 13153.8 906.581   2
  20   8  14 5680.50 604.498   2
  20   8  15 51872.8 1708.53   2
  20   8  16 9884.77 725.646   2
  20   8  17 3138.26 393.370   2
  20   8  18-148.415 166.646   2
 -20 -10   0 7196.53 661.015   1
 -20 -10  -1 1982.04 355.744   1
  20  10   1 1459.62 229.467   4
 -20 -10   1 2283.71 409.997   1
 -20 -10   2 16552.8 1044.35   1
  20  10   2 13363.4 731.915   4
  20  10   3 427.543 151.528   4
 -20 -10   3 637.422 268.014   1
  20 -10   3 560.971 236.703   3
  20  10   4 112.216 148.228   4
 -20 -10   4 260.215 234.917   1
  20 -10   4-134.414 252.935   3
  20  10   5-146.217 200.100   4
  20 -10   5 117.993 211.306   3
  20  10   6 264.100 192.526   2
  20  10   6 142.870 155.464   4
 -20 -10   6 329.952 240.231   1
  20  10   7 65.0533 180.302   4
  20  10   7 130.190 178.773   2
 -20 -10   7 73.6789 203.194   1
 -20 -10   8 351.621 215.383   1
  20  10   8 376.270 230.107   4
  20  10   8 683.092 274.076   2
  20  10   9 7113.86 724.569   4
 -20 -10   9 5586.07 671.794   1
  20  10   9 6444.23 649.293   2
  20  10  10 172.251 219.745   4
  20  10  10 287.684 220.120   2
  20  10  11 14755.8 1027.08   4
  20  10  11 14099.6 934.117   2
  20  10  12 53.6824 209.190   4
  20  10  12 59.5628 232.753   2
  20  10  13 6053.74 613.318   2
  20  10  14-191.482 217.424   2
  20  10  15 302.039 190.412   2
  20  10  16 122.400 144.243   2
  20  10  17-202.154 168.627   2
 -20 -12   0 86404.6 2454.79   1
 -20 -12  -1 520.286 238.190   1
  20  12   1 778.757 217.343   4
 -20 -12   1 578.232 326.999   1
 -20 -12   2 30298.0 1516.62   1
  20  12   2 30955.4 1186.97   4
  20  12   3 136.424 148.754   4
 -20 -12   3 7.04573 204.746   1
  20  12   4 1890.64 353.878   2
  20  12   4 1779.46 315.500   4
 -20 -12   4 1676.39 430.278   1
  20 -12   4 1673.77 420.761   3
 -20 -12   5 8895.97 865.099   1
  20  12   5 9066.27 683.873   4
  20 -12   5 8538.85 816.562   3
  20  12   5 9680.12 720.073   2
 -20 -12   6 27654.5 1495.15   1
  20  12   6 30864.9 1270.12   4
  20  12   6 31572.8 1312.17   2
  20  12   7 2133.96 389.785   4
  20  12   7 2268.80 374.107   2
 -20 -12   7 2371.65 485.021   1
  20  12   8 5015.61 559.916   4
 -20 -12   8 3890.56 596.902   1
  20  12   8 4197.94 495.760   2
  20  12   9 43700.3 1638.03   4
  20  12   9 45920.3 1661.67   2
  20  12  10 3885.33 518.225   4
  20  12  10 4420.88 544.512   2
  20  12  11 55385.3 1879.61   4
  20  12  11 57704.5 1855.71   2
  20  12  12 358.608 266.270   4
  20  12  12 93.3062 178.678   2
  20  12  13 1209.21 318.307   4
  20  12  13 870.384 259.617   2
  20  12  14 578.961 226.075   2
  20  12  15 16629.8 857.627   2
  20  12  16 5348.70 452.889   2
  20  14   0 24616.3 1088.15   4
  20  14   1 489.537 194.506   4
 -20 -14   1 508.689 316.332   1
  20  14   2 1456.75 309.314   4
 -20 -14   2 1840.56 469.230   1
  20  14   3 2789.60 405.798   4
 -20 -14   3 2262.03 468.646   1
  20  14   4 31.0451 172.662   4
 -20 -14   4 183.895 226.112   1
  20 -14   4-88.8067 323.820   3
 -20 -14   5 4598.61 652.232   1
  20  14   5 5744.25 568.751   4
  20 -14   5 4872.82 640.856   3
  20  14   6-228.138 249.974   4
  20  14   7-72.1216 220.644   4
  20  14   7-528.642 276.497   2
  20  14   8 2585.38 391.820   4
  20  14   8 2715.74 415.856   2
  20  14   9 26041.0 1244.41   4
  20  14   9 27080.2 1250.70   2
  20  14  10 1879.32 370.242   4
  20  14  10 1957.84 368.938   2
  20  14  11 17137.4 996.850   4
  20  14  11 18047.6 1007.86   2
  20  14  12 256.768 209.448   4
  20  14  12-198.894 205.031   2
  20  14  13 761.510 226.091   4
  20  14  13 765.439 234.034   2
  20  14  14 237.940 164.793   2
  20  14  15 2532.71 312.400   2
  20  16   0 1872.95 342.208   4
  20  16   1 280.537 205.786   4
  20  16   2 4211.55 499.521   4
  20  16   3-65.6566 191.706   4
  20  16   4 841.317 281.981   4
  20 -16   4 824.887 329.631   3
  20  16   5 9746.83 747.166   4
  20  16   6 5891.06 590.564   4
  20  16   7 10608.5 771.640   4
  20  16   8 604.730 222.901   4
  20  16   9 746.615 197.836   4
  20  16  10 6.56541 181.966   4
  20  16  11 439.021 210.464   4
  20  16  12-213.527 170.769   4
  20  18   0 15057.0 895.091   4
  20  18   1 92.0683 198.060   4
  20  18  -1-25.8225 161.043   4
  20  18   2 3919.01 479.163   4
  20  18  -2 3913.73 461.321   4
  20  18   3-89.3990 211.320   4
  20 -18   3-140.708 284.297   3
  20  18   4 33965.7 1369.74   4
  20 -18   4 33897.8 1792.99   3
  20  18   5 25729.1 1172.69   4
  20  18   6 28197.3 1229.09   4
  20  18   7 12275.2 807.816   4
  20  18   8-307.552 202.761   4
  20  18   9 3585.19 438.408   4
  20  18  10 654.849 241.841   4
  20 -18 -10-140.367 319.489   3
  20  18  11 7620.67 577.516   4
  20  20   0 8831.66 663.984   4
  20  20   1 142.761 170.846   4
  20  20  -1 448.841 191.230   4
  20  20   2-189.183 188.151   4
  20  20  -2 5.10720 171.048   4
  20 -20   2 349.122 326.182   3
  20  20   3 1401.03 300.971   4
  20  20  -3 1867.06 320.472   4
  20 -20   3 1360.66 467.985   3
  20  20   4 22106.2 1047.30   4
  20  20  -4 23731.0 999.762   4
  20  20   5 12321.9 768.391   4
  20  20  -5 14855.7 783.739   4
  20  20   6 8820.01 654.765   4
  20  20   7 5578.12 516.765   4
  20  20   8-117.773 155.585   4
  20  20   9 3492.20 389.356   4
  20 -20  -9 3707.97 568.203   3
  20  22   0-119.897 151.021   4
  20 -22   0 304.908 299.389   3
  20  22   1 119.438 127.198   4
  20  22  -1 24.2735 125.997   4
  20 -22   1-570.913 358.449   3
  20 -22  -1-32.5729 286.831   3
  20  22   2 6676.50 538.113   4
  20  22  -2 6937.32 531.622   4
  20 -22   2 6454.08 794.412   3
  20  22   3 1980.40 294.251   4
  20  22  -3 1696.70 263.440   4
  20  22   4 557.984 162.396   4
  20  22  -4 503.376 143.795   4
  20  22   5 122.882 132.927   4
  20  22  -5-68.7995 118.908   4
  20  22   6 47.6553 121.532   4
  20  22  -6-161.451 138.529   4
  20 -22  -7 55.4860 258.452   3
 -21  -1   0 2308.02 343.791   1
 -21  -1  -1 135710. 2441.05   1
 -21  -1   1 137387. 2361.50   1
 -21   1   2 759.158 200.159   1
 -21  -1   2 616.086 190.845   1
 -21  -1   3 51065.2 1440.80   1
 -21   1   3 50490.0 1487.44   1
 -21   1   4 10622.2 687.479   1
 -21  -1   4 11168.7 682.485   1
 -21   1   5 29538.6 1160.89   1
 -21  -1   5 29260.9 1117.82   1
  21   1   5 27965.6 1240.48   3
  21  -1   5 26756.7 1288.26   3
 -21   1   6 30985.1 1221.19   1
 -21  -1   6 30213.8 1174.91   1
  21   1   6 27508.4 1228.51   3
 -21   1   7 5249.16 517.362   1
 -21  -1   7 6145.07 558.291   1
  21   1   7 4798.70 512.348   3
  21  -1   7 4223.14 496.103   3
 -21   1   8 8118.98 685.034   1
 -21  -1   8 8904.16 697.522   1
  21  -1   9 3239.88 419.698   2
  21   1   9 2715.75 399.103   2
 -21   1   9 3271.05 461.079   1
 -21  -1   9 3302.73 453.019   1
 -21   1  10 34310.5 1603.35   1
  21  -1  10 35000.0 1401.40   2
  21   1  10 33056.6 1394.13   2
 -21  -1  10 36698.8 1592.79   1
 -21  -1  11 367.869 214.252   1
  21  -1  11 436.739 251.954   2
  21   1  11 750.067 316.382   2
  21  -1  12 7597.06 705.240   2
  21   1  12 7534.49 705.532   2
  21  -1  13-365.709 309.902   2
  21   1  13-293.189 310.758   2
  21  -1  14 12616.5 870.401   2
  21   1  14 13219.0 922.952   2
  21  -1  15 10339.3 780.485   2
  21   1  15 9913.43 790.573   2
  21  -1  16 17252.9 946.890   2
  21   1  16 16268.3 968.185   2
  21  -1  17 998.259 225.289   2
  21   1  17 1433.11 305.164   2
  21   1  18 696.457 203.543   2
 -21  -3   0-144.128 189.219   1
 -21  -3   1 9446.84 631.995   1
 -21  -3  -1 8540.14 585.232   1
 -21  -3  -2 1746.27 281.021   1
 -21  -3   2 2282.46 341.318   1
  21   3   3 27204.3 1249.36   3
 -21  -3   3 29440.6 1133.49   1
 -21  -3   4 1214.61 293.483   1
  21   3   4 459.425 227.089   3
  21  -3   4 443.955 231.488   3
  21  -3  -4 790.409 258.072   3
 -21  -3   5-97.3380 143.493   1
  21   3   5 2.61017 168.511   3
  21  -3   5-22.6528 221.977   3
  21  -3  -5-194.147 201.218   3
 -21  -3   6 1190.81 278.543   1
  21  -3   6 1086.15 311.502   3
  21  -3  -6 727.089 232.269   3
  21  -3   7 2635.84 409.054   3
 -21  -3   7 3528.73 454.853   1
 -21  -3   8 518.284 259.307   1
  21   3   9 28.8345 202.793   2
  21  -3   9 192.001 198.876   2
 -21  -3   9 403.506 246.438   1
 -21  -3  10 4092.15 544.303   1
  21  -3  10 3298.40 424.803   2
  21   3  10 3462.39 471.275   2
 -21  -3  11 1618.59 398.868   1
  21  -3  11 1326.24 296.691   2
  21   3  11 1169.84 307.313   2
 -21  -3  12 848.067 326.459   1
  21  -3  12 829.005 224.164   2
  21   3  12 983.936 320.460   2
  21  -3  13-99.6385 208.944   2
  21   3  13-513.765 334.259   2
  21   3  14 142.241 230.112   2
  21   3  15 1502.23 340.866   2
  21   3  16-52.6531 180.984   2
  21   3  17 150.526 145.992   2
  21   3  18 218.307 126.616   2
  21   5   0 1731.39 376.830   3
 -21  -5   0 2850.92 425.210   1
  21  -5   0 2079.32 385.327   3
  21   5   1 48383.9 1626.39   3
  21   5  -1 44247.5 1543.58   3
 -21  -5   1 49511.6 1490.45   1
  21  -5   1 47643.0 1581.37   3
  21  -5  -1 50450.8 1551.89   3
 -21  -5  -1 50555.7 1446.75   1
 -21  -5  -2 381.302 155.788   1
  21   5   2 317.194 199.440   3
  21   5  -2 537.019 262.618   3
  21  -5   2 382.031 253.449   3
 -21  -5   2-135.371 235.240   1
  21  -5  -2 369.570 191.313   3
  21   5   3 33127.9 1363.43   3
 -21  -5   3 33116.7 1248.19   1
  21  -5   3 32824.3 1413.19   3
  21  -5  -3 33463.7 1275.35   3
 -21  -5  -3 35763.6 1235.00   1
 -21  -5   4 38706.6 1372.63   1
  21  -5   4 36300.3 1551.75   3
  21  -5  -4 38185.2 1373.75   3
 -21  -5   5 62709.0 1780.96   1
  21  -5   5 57001.9 1972.62   3
  21  -5  -5 60588.1 1748.56   3
 -21  -5   6 29881.0 1263.49   1
  21  -5  -6 30590.4 1281.14   3
 -21  -5   7 1818.44 303.436   1
  21  -5  -7 2976.32 439.702   3
  21   5   8-111.892 233.277   2
 -21  -5   8-241.978 262.748   1
 -21  -5   9 2089.74 431.634   1
  21   5   9 1724.35 339.618   2
  21   5  10 29233.7 1299.52   2
 -21  -5  10 29162.1 1475.93   1
  21   5  11 1032.11 301.906   2
 -21  -5  11 572.977 265.773   1
 -21  -5  12 4264.11 629.449   1
  21   5  12 5594.88 619.647   2
  21   5  13-486.648 348.442   2
  21   5  14 20679.3 1153.24   2
  21   5  15 6076.77 625.187   2
  21   5  16 23082.8 1139.02   2
  21   5  17 4012.59 455.123   2
  21   5  18-508.485 245.775   2
 -21  -7   0 116.536 203.970   1
 -21  -7   1 64699.8 1781.85   1
 -21  -7  -1 63443.7 1691.33   1
  21  -7   1 63304.0 1869.99   3
 -21  -7   2 129.122 203.398   1
 -21  -7  -2 568.858 214.741   1
  21  -7   2 290.588 219.804   3
 -21  -7   3 28927.5 1255.90   1
  21  -7   3 29187.7 1367.48   3
 -21  -7   4 34794.0 1395.62   1
  21  -7   4 33404.7 1519.18   3
 -21  -7   5 101450. 2408.68   1
  21  -7   5 98625.2 2660.48   3
 -21  -7   6 45393.2 1632.34   1
  21  -7   6 38697.9 1716.77   3
 -21  -7   7 13338.5 912.321   1
 -21  -7   8 4078.42 530.412   1
  21  -7  -8 4882.71 555.035   3
  21   7   8 5292.52 551.883   2
 -21  -7   9 4985.48 616.694   1
  21   7   9 5861.48 591.804   2
  21   7  10 53302.1 1783.92   2
 -21  -7  10 48374.9 1947.80   1
 -21  -7  11 765.853 297.026   1
  21   7  11 504.609 225.654   2
  21   7  12 6264.88 653.297   2
  21   7  13-298.709 348.116   2
  21   7  14 23155.6 1205.25   2
  21   7  15 12751.8 882.911   2
  21   7  16 27955.5 1223.23   2
  21   7  17 3134.63 388.940   2
  21   7  18-16.9876 120.624   2
 -21  -9   0-140.399 233.079   1
 -21  -9   1 952.531 241.861   1
 -21  -9  -1 707.686 142.770   1
 -21  -9   2 1462.97 306.666   1
  21  -9   2 2167.53 417.275   3
 -21  -9  -2 2000.18 325.684   1
 -21  -9   3 129.362 180.155   1
  21  -9   3 397.095 259.635   3
 -21  -9   4 90.6321 200.794   1
  21  -9   4 190.655 250.023   3
 -21  -9   5 9295.67 786.665   1
  21  -9   5 9244.81 863.184   3
 -21  -9   6 30279.0 1434.23   1
  21  -9   6 27094.4 1469.56   3
  21   9   7 14329.8 938.894   4
 -21  -9   7 13659.1 969.149   1
  21   9   7 14618.1 888.308   2
  21   9   8 314.945 200.037   4
 -21  -9   8 149.332 210.129   1
  21   9   8 476.986 247.314   2
  21   9   9 595.562 259.141   4
 -21  -9   9 383.010 235.443   1
  21  -9  -9 447.362 215.948   3
  21   9   9 645.603 277.751   2
  21   9  10 4064.35 578.448   4
 -21  -9  10 2843.54 482.230   1
  21   9  10 3462.64 469.381   2
  21   9  11-123.978 293.777   4
  21   9  11-175.533 254.566   2
  21   9  12 2545.50 492.159   4
  21   9  12 2028.00 391.024   2
  21   9  13-150.067 250.690   2
  21   9  14 3861.18 495.223   2
  21   9  15 827.443 283.243   2
  21   9  16 1124.39 262.530   2
  21   9  17-21.8762 152.065   2
 -21 -11   0 213.075 209.551   1
 -21 -11   1 38351.8 1618.16   1
 -21 -11  -1 36371.6 1483.73   1
 -21 -11   2 5761.38 641.120   1
  21  11   2 5159.30 474.983   4
 -21 -11   3 5449.33 660.909   1
  21  11   3 5109.02 492.929   4
  21 -11   3 5462.71 648.250   3
 -21 -11   4 6775.95 733.179   1
  21  11   4 6421.63 557.900   4
  21 -11   4 7209.78 745.415   3
 -21 -11   5 13171.1 1023.50   1
  21  11   5 13463.2 821.607   4
  21 -11   5 14723.9 1072.69   3
  21  11   5 14144.8 865.009   2
  21  11   6 20403.5 1022.13   4
 -21 -11   6 19117.7 1215.88   1
  21  11   6 19921.3 1060.13   2
 -21 -11   7 2984.75 504.275   1
  21  11   7 2617.78 416.760   4
  21  11   7 3188.84 444.933   2
  21  11   8 2253.82 405.093   4
 -21 -11   8 1938.03 421.306   1
  21  11   8 1867.71 372.062   2
  21  11   9 2925.52 457.663   4
  21  11   9 2845.72 453.224   2
  21  11  10 36361.0 1541.85   4
  21  11  10 36555.4 1502.36   2
  21 -11 -10 37037.7 1601.48   3
  21  11  11 594.526 281.549   4
  21  11  11 937.641 271.459   2
  21  11  12 9889.94 799.591   4
  21  11  12 8500.63 711.101   2
  21  11  13-125.296 213.467   2
  21  11  14 5657.17 559.420   2
  21  11  15 4321.79 469.644   2
  21  11  16 11101.9 674.836   2
 -21 -13   0 36.9266 188.242   1
  21  13   0 320.094 163.751   4
 -21 -13   1 24959.8 1422.85   1
  21  13   1 25791.9 1086.46   4
  21  13   2 142.622 165.108   4
 -21 -13   2 333.845 313.866   1
  21  13   3 1283.02 285.590   4
 -21 -13   3 938.763 340.584   1
  21 -13   3 826.607 319.074   3
  21  13   4 314.976 144.412   4
  21 -13   4-88.2257 317.447   3
 -21 -13   4 138.964 223.722   1
 -21 -13   5 21126.8 1351.41   1
  21  13   5 22337.1 1076.73   4
  21  13   5 21557.3 1087.98   2
  21 -13   5 22055.2 1313.75   3
 -21 -13   6 15426.5 1165.44   1
  21  13   6 16931.3 956.615   4
  21  13   6 18409.5 1024.03   2
  21  13   7 3675.05 486.203   4
  21  13   7 3462.70 454.991   2
  21  13   8 5617.50 601.162   4
  21  13   8 5935.26 595.345   2
  21  13   9 3625.14 509.794   4
  21  13   9 3024.55 458.404   2
  21  13  10 34400.8 1424.34   4
  21  13  10 34454.0 1443.15   2
  21 -13 -10 34699.1 1599.35   3
  21  13  11 221.940 234.475   4
  21  13  11 303.853 199.150   2
  21  13  12 3572.46 478.104   4
  21  13  12 3470.33 457.432   2
  21  13  13 75.6555 139.757   2
  21  13  14 11357.4 718.471   2
  21  13  15 4048.77 405.114   2
  21  15   0 16.2007 146.417   4
  21  15   1 405.941 201.049   4
  21  15   2 43.8116 170.002   4
 -21 -15   2 246.104 234.534   1
  21  15   3 703.816 247.769   4
  21 -15   3-173.425 332.502   3
 -21 -15   3-29.1966 258.372   1
  21  15   4 1810.12 343.873   4
  21 -15   4 1746.01 428.277   3
  21  15   5 194.999 182.275   4
  21 -15   5-174.863 315.670   3
  21  15   6 569.298 241.902   4
  21  15   7 32.7459 204.145   4
  21  15   8 2249.47 392.753   4
  21  15   9 624.814 189.432   4
  21  15  10 4086.10 497.368   4
  21  15  10 4171.18 482.573   2
  21 -15 -10 4528.10 586.599   3
  21  15  11-132.484 189.290   4
  21  15  11 57.2414 141.397   2
  21  15  12 139.284 162.330   4
  21  15  12 367.045 191.711   2
  21  15  13 66.7062 132.795   2
  21  17   0 156.910 150.297   4
  21  17   1 1372.80 289.275   4
  21  17  -1 1572.13 306.443   4
  21  17   2 123.536 161.144   4
  21  17  -2 366.299 210.465   4
  21  17   3 120.272 183.861   4
  21 -17   3-140.935 360.293   3
  21  17   4 1861.14 369.986   4
  21 -17   4 2948.14 564.872   3
  21  17   5 13276.2 861.505   4
  21  17   6 14153.5 889.658   4
  21  17   7 2424.78 391.608   4
  21  17   8-379.222 239.203   4
  21  17   9 214.819 155.799   4
  21  17  10 10940.7 735.955   4
  21 -17 -10 9885.81 869.332   3
  21  17  11 16.0739 132.020   4
  21  17  12 1607.42 263.871   4
  21  19   0 166.226 156.223   4
  21  19   1 17122.2 936.644   4
  21  19  -1 17592.6 936.162   4
  21  19   2 9.09119 165.026   4
  21  19  -2 420.227 161.017   4
  21 -19   2-196.919 314.679   3
  21  19   3 4698.79 511.939   4
  21  19  -3 5271.34 496.738   4
  21 -19   3 5577.71 817.109   3
  21  19   4 10135.7 721.724   4
  21  19  -4 9853.06 671.316   4
  21  19   5 18464.9 948.157   4
  21  19   6 12682.1 791.230   4
  21  19   7 3214.83 419.308   4
  21  19   8 201.705 145.407   4
  21  19   9 1456.50 286.179   4
  21 -19  -9 1052.34 356.568   3
  21  19  10 16314.3 801.069   4
  21 -19 -10 16120.0 1095.54   3
  21  21   0-85.7282 171.871   4
  21 -21   0-12.7295 312.319   3
  21  21   1 2470.55 337.452   4
  21  21  -1 2557.45 350.750   4
  21 -21   1 2535.92 507.373   3
  21 -21  -1 1464.57 359.691   3
  21  21   2-61.2931 153.347   4
  21  21  -2 40.5506 147.657   4
  21 -21   2 281.127 362.907   3
  21  21   3 3599.20 413.546   4
  21  21  -3 4007.12 406.821   4
  21  21   4 1031.17 227.137   4
  21  21  -4 1223.48 234.687   4
  21  21   5 3749.62 396.784   4
  21  21  -5 3857.76 373.720   4
  21  21   6 1221.51 248.328   4
  21  21  -6 1040.96 192.082   4
  21 -21  -6 802.098 313.080   3
  21  21   7-153.645 151.993   4
  21  21  -7-65.6402 105.775   4
  21 -21  -7-484.550 373.275   3
  21 -21  -8 242.464 253.990   3
  21  23   0 21.7900 111.538   4
  21 -23   0 234.091 236.785   3
  21 -23  -1 3527.29 498.566   3
  21 -23  -2 350.891 229.970   3
  21 -23  -3-131.555 228.182   3
  21 -23  -4-339.811 256.093   3
 -22   0   1 8605.36 650.401   1
 -22   0   2 930.445 227.723   1
  22   0   3 31891.1 1449.01   3
 -22   0   3 32667.2 1218.14   1
  22   0   4 262536. 4095.07   3
 -22   0   4 267990. 3470.99   1
  22   0   5 60789.1 1911.46   3
  22   0  -5 57807.1 1911.09   3
 -22   0   5 62842.3 1699.35   1
  22   0   6 53465.4 1755.33   3
 -22   0   6 59481.6 1696.86   1
  22   0   7 13837.5 892.525   3
 -22   0   7 18349.7 983.252   1
 -22   0   8-72.5196 189.034   1
  22   0   8-162.524 198.796   3
 -22   0   9 18244.2 1102.34   1
  22   0   9 17021.0 957.350   2
  22   0  10 493.656 217.092   2
 -22   0  10 938.779 303.804   1
 -22   0  11 9421.87 889.576   1
  22   0  11 11528.4 859.153   2
  22   0  12 615.615 245.080   2
  22   0  13 7225.95 681.379   2
  22   0  14 6585.47 639.126   2
  22   0  15 49384.7 1704.92   2
  22   0  16 8682.58 703.062   2
  22   0  17 4340.29 460.747   2
 -22  -2   0 41981.7 1351.27   1
 -22  -2   1 310.624 160.502   1
 -22  -2  -1 147.758 150.674   1
  22   2   1 43.7145 231.482   3
 -22  -2   2 966.448 231.667   1
  22   2   2 1282.05 323.694   3
  22  -2   2 1639.39 340.188   3
  22  -2  -2 1313.26 288.173   3
 -22  -2   3 1954.30 319.374   1
  22   2   3 1558.62 319.186   3
  22  -2   3 1939.88 432.240   3
  22  -2  -3 1882.11 367.473   3
 -22  -2   4 6871.29 572.313   1
  22   2   4 6243.17 608.254   3
  22  -2   4 6821.97 702.451   3
  22  -2  -4 6188.76 612.967   3
 -22  -2   5 21930.5 1013.71   1
  22   2   5 22036.6 1139.96   3
  22   2  -5 18191.3 1088.40   3
  22  -2   5 20713.5 1184.30   3
  22  -2  -5 20939.3 1097.61   3
 -22  -2   6 16582.2 899.666   1
  22   2   6 16209.2 969.288   3
  22  -2   6 13789.8 943.114   3
  22  -2  -6 14965.4 951.660   3
 -22  -2   7 12115.1 804.351   1
  22  -2   7 8148.45 686.897   3
 -22  -2   8 143.092 146.268   1
  22  -2   9-331.657 202.598   2
  22   2   9-86.0979 181.263   2
 -22  -2   9 72.6305 149.438   1
 -22  -2  10 3267.99 490.588   1
  22  -2  10 3663.94 444.862   2
  22   2  10 3618.79 485.091   2
  22  -2  11 18991.6 1047.86   2
  22   2  11 19102.1 1099.57   2
 -22  -2  11 17428.4 1189.80   1
  22  -2  12 731.463 260.943   2
  22   2  12 752.293 293.001   2
  22  -2  13 243.442 179.901   2
  22   2  13 273.480 226.465   2
  22  -2  14 579.073 247.859   2
  22   2  14 494.126 233.747   2
  22  -2  15 11191.1 781.095   2
  22   2  15 11213.1 844.295   2
  22   2  16 4511.49 523.268   2
  22   2  17 3231.44 410.935   2
  22   2  18-281.150 181.950   2
 -22  -4   0 116204. 2261.67   1
  22   4   0 112020. 2568.86   3
  22  -4   0 112896. 2442.91   3
 -22  -4  -1 2176.07 322.230   1
  22   4   1 2128.46 399.593   3
  22   4  -1 1553.37 324.806   3
  22  -4   1 2110.82 389.814   3
  22  -4  -1 2616.91 404.413   3
 -22  -4   1 2904.82 408.180   1
  22   4   2 13890.1 903.221   3
  22   4  -2 11120.5 822.125   3
  22  -4   2 13563.2 911.862   3
  22  -4  -2 13295.9 832.774   3
 -22  -4  -2 13752.2 771.933   1
 -22  -4   2 14219.8 829.215   1
 -22  -4  -3 2592.91 346.917   1
  22   4   3 3128.03 472.574   3
  22   4  -3 2699.24 410.333   3
 -22  -4   3 3908.32 462.838   1
  22  -4   3 2392.87 420.045   3
  22  -4  -3 3277.88 443.133   3
  22   4   4 30930.8 1357.80   3
  22  -4   4 29128.5 1419.84   3
  22  -4  -4 29215.5 1236.53   3
 -22  -4   4 30276.4 1234.02   1
  22  -4   5 7651.98 777.291   3
  22  -4  -5 7570.49 664.298   3
 -22  -4   5 8253.80 659.798   1
  22  -4   6 3299.51 520.830   3
 -22  -4   6 4170.69 487.172   1
  22  -4  -6 3630.93 475.306   3
 -22  -4   7 1038.07 294.018   1
  22  -4   7 423.201 260.538   3
  22  -4  -7 572.357 280.745   3
  22  -4   8 2584.33 363.241   2
 -22  -4   8 2767.30 448.408   1
  22   4   9 2804.34 403.724   2
 -22  -4   9 3196.77 487.352   1
  22  -4   9 2439.43 377.954   2
 -22  -4  10 1165.54 306.644   1
  22  -4  10 1288.63 311.451   2
  22   4  10 986.374 278.078   2
 -22  -4  11 28255.3 1529.82   1
  22   4  11 32522.1 1427.06   2
  22   4  12 448.734 297.826   2
  22   4  13 7496.54 698.077   2
  22   4  14 166.983 242.502   2
  22   4  15 3716.42 481.935   2
  22   4  16 767.135 266.515   2
  22   4  17 1324.12 260.248   2
  22   4  18-424.310 218.967   2
  22   6   0 244274. 3686.07   3
  22  -6   0 248040. 3648.91   3
 -22  -6   0 256009. 3469.40   1
  22   6  -1 2614.39 437.952   3
  22  -6  -1 3311.31 463.053   3
  22  -6   1 2766.31 439.301   3
 -22  -6  -1 3400.47 435.081   1
 -22  -6   1 3214.99 417.716   1
 -22  -6  -2 7584.06 586.029   1
  22   6  -2 6459.37 608.025   3
 -22  -6   2 6302.58 568.835   1
  22  -6   2 7051.84 669.735   3
  22  -6  -2 6551.42 600.916   3
  22   6  -3 1946.18 348.046   3
 -22  -6   3 1967.23 310.456   1
 -22  -6  -3 2150.56 324.349   1
  22  -6   3 1894.01 409.600   3
  22  -6  -3 2176.47 390.738   3
 -22  -6   4 66089.8 1891.21   1
  22  -6   4 69332.2 2211.85   3
  22  -6  -4 64577.4 1867.96   3
 -22  -6   5 55768.4 1766.24   1
  22  -6   5 55594.6 2036.23   3
  22  -6  -5 59015.4 1817.59   3
 -22  -6   6 26037.2 1227.32   1
  22  -6   6 25787.8 1413.44   3
  22  -6  -6 28268.5 1270.01   3
 -22  -6   7 1843.75 315.252   1
  22  -6  -7 1816.59 360.891   3
  22   6   8-23.2290 193.104   2
  22  -6  -8 45.6934 209.459   3
 -22  -6   8-275.224 290.505   1
 -22  -6   9 28125.5 1430.75   1
  22   6   9 29148.1 1291.69   2
  22   6  10 5537.52 609.145   2
 -22  -6  10 5514.59 705.914   1
  22   6  11 44587.2 1659.15   2
 -22  -6  11 36719.3 1765.20   1
  22   6  12 1303.51 344.304   2
  22   6  13 2177.80 350.995   2
  22   6  14 1642.70 295.577   2
  22   6  15 26852.5 1267.18   2
  22   6  16 8167.56 679.835   2
  22   6  17 1826.67 319.130   2
  22   6  18 429.453 140.292   2
 -22  -8   0 126077. 2579.20   1
 -22  -8  -1 1046.73 275.199   1
 -22  -8   1 679.053 216.831   1
  22  -8   1 1003.22 320.437   3
 -22  -8   2 11585.5 818.217   1
  22  -8   2 11592.8 870.585   3
 -22  -8  -2 12000.3 778.046   1
 -22  -8   3 355.829 198.513   1
  22  -8   3 696.395 290.988   3
 -22  -8   4 19070.6 1097.98   1
  22  -8   4 19014.7 1193.70   3
 -22  -8   5 11610.6 858.722   1
  22  -8   5 10980.4 955.880   3
 -22  -8   6 29557.2 1393.96   1
  22  -8   6 28928.1 1548.28   3
 -22  -8   7 49456.3 1822.80   1
  22   8   7 52661.1 1661.07   2
 -22  -8   8-345.103 298.687   1
  22  -8  -8 454.396 278.900   3
  22   8   8 176.637 204.613   2
 -22  -8   9 35184.2 1638.70   1
  22   8   9 36856.4 1454.19   2
  22  -8  -9 34914.1 1519.48   3
  22   8  10 3735.61 501.803   2
 -22  -8  10 2224.90 390.687   1
  22   8  11 28934.8 1325.98   2
  22   8  12 445.178 200.743   2
  22   8  13 1330.82 281.893   2
  22   8  14-142.588 227.411   2
  22   8  15 11076.9 789.320   2
  22   8  16 3846.45 465.025   2
  22   8  17 237.997 157.495   2
 -22 -10   0 1260.17 262.309   1
 -22 -10   1 1349.45 290.909   1
 -22 -10  -1 1374.07 251.541   1
 -22 -10   2-94.8025 253.104   1
  22 -10   2-99.2652 305.217   3
 -22 -10   3 1913.93 386.538   1
  22 -10   3 2132.40 427.428   3
 -22 -10   4 12552.9 953.209   1
  22 -10   4 13568.2 1015.01   3
 -22 -10   5 865.990 281.578   1
  22 -10   5 1036.74 380.281   3
  22  10   6 372.308 236.767   2
 -22 -10   6-235.939 261.653   1
  22 -10   6-78.8095 290.851   3
 -22 -10   7-157.157 198.515   1
  22  10   7-28.0016 189.212   2
  22  10   8 528.949 254.181   4
 -22 -10   8 96.5245 229.265   1
  22  10   8 360.336 189.421   2
  22  10   9 720.844 232.399   4
 -22 -10   9 162.475 171.132   1
  22  10   9 491.480 209.688   2
  22 -10  -9 654.664 257.095   3
  22  10  10 93.9630 231.771   4
  22  10  10 34.0665 194.561   2
  22  10  11 6870.38 702.327   4
  22  10  11 6853.44 657.768   2
  22  10  12 117.838 235.115   4
  22  10  12-208.923 250.125   2
  22  10  13 682.498 204.239   2
  22  10  14 334.932 192.866   2
  22  10  15 4821.93 506.529   2
  22  10  16 3154.48 386.730   2
  22  10  17 2011.38 273.593   2
  22  12   0 51450.6 1477.77   4
 -22 -12   0 52408.3 1930.64   1
 -22 -12   1 2888.62 480.878   1
  22  12   1 3177.25 395.925   4
 -22 -12   2 102.234 227.304   1
  22  12   2 192.234 166.608   4
 -22 -12   3 3238.33 531.384   1
  22  12   3 3228.93 399.006   4
  22 -12   3 2534.48 474.683   3
 -22 -12   4 27173.2 1492.39   1
  22  12   4 27802.9 1149.95   4
  22 -12   4 29987.8 1515.07   3
  22  12   4 29191.4 1238.90   2
  22  12   5 22795.9 1063.96   4
 -22 -12   5 22144.8 1336.16   1
  22 -12   5 24007.7 1389.11   3
  22  12   5 23945.0 1147.38   2
  22  12   6 20476.7 1035.57   4
 -22 -12   6 19482.2 1279.65   1
  22  12   6 20832.7 1096.01   2
  22  12   7 19180.1 1033.32   4
 -22 -12   7 19114.1 1265.50   1
  22  12   7 19006.8 1062.56   2
  22  12   8 368.686 245.000   4
  22  12   8-172.697 236.464   2
  22  12   9 23797.1 1189.21   4
  22  12   9 23361.3 1172.20   2
  22  12  10 1023.05 275.335   4
  22  12  10 1375.56 332.190   2
  22 -12 -10 1223.71 359.167   3
  22  12  11 18486.2 1059.28   4
  22  12  11 17539.0 1018.16   2
  22  12  12 154.605 194.682   4
  22  12  12 125.925 183.822   2
  22  12  13 4170.38 480.294   2
  22  12  14 3398.38 428.390   2
  22  12  15 30414.7 1126.83   2
  22  12  16 8765.68 557.083   2
  22  14   0 14391.6 835.122   4
 -22 -14   1 92.1174 213.950   1
  22  14   1 222.109 175.379   4
 -22 -14   2 254.521 191.026   1
  22  14   2 202.803 194.964   4
 -22 -14   3-278.352 306.343   1
  22  14   3 476.981 191.555   4
  22 -14   3-9.47995 352.403   3
 -22 -14   4 1942.46 449.283   1
  22  14   4 2859.43 410.432   4
  22 -14   4 2748.21 500.181   3
  22  14   5 7236.62 620.422   4
  22 -14   5 7002.67 791.729   3
  22  14   6 22973.8 1101.71   4
  22  14   7 3820.61 456.963   4
  22  14   7 3923.63 467.177   2
  22  14   8 119.824 158.855   4
  22  14   8-435.516 268.761   2
  22  14   9 5595.62 560.733   4
  22  14   9 5454.81 564.648   2
  22  14  10 1037.90 268.802   4
  22  14  10 1271.30 289.700   2
  22 -14 -10 995.672 318.386   3
  22  14  11 3272.81 430.210   4
  22  14  11 3657.23 456.109   2
  22  14  12 169.700 182.592   4
  22  14  12-87.9470 145.774   2
  22  14  13 3727.04 419.498   2
  22  14  14 682.204 205.890   2
  22  16   0 6691.09 600.856   4
  22  16   1 13.1978 158.024   4
  22  16  -1-6.88410 147.024   4
  22  16   2 1123.50 280.757   4
  22 -16   2 1673.74 426.965   3
  22  16   3 466.778 228.622   4
  22 -16   3-100.957 317.805   3
  22  16   4 667.582 221.411   4
  22 -16   4 554.200 300.891   3
  22  16   5 104.710 181.688   4
  22  16   6 304.389 208.808   4
  22  16   7-60.6032 187.073   4
  22  16   8-59.9280 183.103   4
  22  16   9 543.452 239.784   4
  22 -16  -9 341.045 305.184   3
  22  16  10 362.419 179.554   4
  22 -16 -10 355.665 247.249   3
  22  16  11 5813.39 528.064   4
  22  16  12-83.2429 151.269   4
  22  18   0 23624.6 1096.91   4
  22  18   1 688.551 270.128   4
  22  18  -1 746.727 216.209   4
  22  18   2 3300.07 448.312   4
  22  18  -2 2948.48 381.618   4
  22 -18   2 2496.10 550.463   3
  22  18   3 17.4297 175.018   4
  22  18  -3 210.238 164.758   4
  22 -18   3-114.196 298.804   3
  22  18   4 6727.52 626.936   4
  22 -18   4 5935.97 806.914   3
  22  18   5 10148.1 722.870   4
  22  18   6 7409.76 619.432   4
  22  18   7 2418.09 362.973   4
  22  18   8 496.623 209.821   4
  22  18   9 13947.2 794.017   4
  22 -18  -9 15518.8 1120.57   3
  22  18  10 1164.38 257.203   4
  22 -18 -10 1626.54 426.274   3
  22  20   0 28077.1 1123.71   4
  22 -20   0 25103.0 1428.24   3
  22  20   1 636.200 219.144   4
  22  20  -1 471.076 197.876   4
  22 -20   1 765.987 398.990   3
  22  20   2 2135.70 321.613   4
  22  20  -2 2373.29 327.545   4
  22 -20   2 3130.92 624.935   3
  22  20   3 677.300 236.713   4
  22  20  -3 616.882 177.762   4
  22 -20   3 472.790 437.772   3
  22  20   4 4885.60 470.535   4
  22  20  -4 5391.66 464.603   4
  22  20   5 3644.36 414.886   4
  22  20  -5 4224.30 399.836   4
  22  20   6 3274.46 385.135   4
  22  20  -6 3861.01 384.113   4
  22 -20  -6 3274.09 520.201   3
  22  20   7 164.521 130.106   4
  22  20  -7 385.947 136.284   4
  22  20   8 556.802 177.254   4
  22 -20  -8 493.816 253.913   3
  22  22   0 330.440 174.071   4
  22 -22   0 195.090 285.543   3
  22  22   1 184.205 122.614   4
  22  22  -1 85.0059 109.581   4
  22 -22   1 200.776 315.591   3
  22 -22  -1-276.250 247.018   3
  22  22   2 159.253 119.383   4
  22  22  -2 106.576 130.986   4
  22 -22   2-66.8860 339.241   3
  22 -22  -2 155.082 216.938   3
  22  22   3-20.5992 111.848   4
  22  22  -3 114.332 116.113   4
  22 -22  -3 167.761 235.689   3
  22  22   4-146.947 134.463   4
  22  22  -4-116.250 126.042   4
  22 -22  -4-249.880 221.514   3
  22 -22  -5 44.2581 210.618   3
  22 -22  -6 353.141 247.755   3
 -23  -1   0 1606.75 314.371   1
  23   1   0 2417.61 486.434   3
  23  -1   0 2391.93 470.664   3
 -23  -1   1 79291.1 1954.70   1
  23   1   1 78571.8 2264.23   3
  23   1  -1 79251.9 2284.71   3
  23  -1   1 76610.7 2194.46   3
  23  -1  -1 76465.4 2156.73   3
  23   1   2 334.165 306.803   3
  23   1  -2 374.958 261.466   3
  23  -1   2 217.800 294.598   3
  23  -1  -2 82.8836 215.077   3
 -23  -1   2-126.902 198.820   1
  23   1   3 98593.7 2542.63   3
  23   1  -3 92794.2 2480.85   3
  23  -1   3 99816.7 2592.02   3
  23  -1  -3 97290.5 2426.49   3
 -23  -1   3 95237.5 2105.63   1
 -23   1   3 95529.3 2228.72   1
  23   1   4 76970.5 2204.57   3
  23  -1   4 75167.9 2273.31   3
 -23  -1   4 76881.9 1903.30   1
  23   1  -4 71631.3 2201.19   3
 -23   1   4 74345.9 1964.88   1
  23  -1  -4 74388.8 2163.68   3
  23   1   5 139453. 2913.11   3
  23  -1   5 136255. 2998.30   3
 -23  -1   5 139525. 2603.43   1
 -23   1   5 136879. 2689.50   1
  23   1  -5 128360. 2925.21   3
  23  -1  -5 129228. 2886.28   3
  23   1   6 76165.8 2129.69   3
 -23   1   6 76605.4 2063.00   1
  23  -1   6 71306.1 2097.68   3
 -23  -1   6 79172.5 2012.98   1
  23  -1  -6 71404.8 2165.54   3
  23   1   7 20870.8 1092.79   3
  23  -1   7 18013.9 1029.08   3
 -23   1   7 21455.1 1121.89   1
 -23  -1   7 21663.8 1093.05   1
  23  -1   8 4084.37 485.168   3
 -23  -1   8 5917.78 606.380   1
 -23   1   8 4967.99 572.098   1
  23  -1   9 3618.79 451.253   2
 -23  -1   9 4108.92 522.623   1
  23   1   9 4154.96 497.608   2
 -23   1   9 3705.05 549.966   1
 -23  -1  10 14425.1 1048.04   1
  23  -1  10 13480.5 889.461   2
  23   1  10 14258.7 928.632   2
  23  -1  11-210.213 198.818   2
  23   1  11-76.7042 228.434   2
 -23  -1  11-181.133 199.982   1
  23  -1  12 2910.56 456.317   2
  23   1  12 3523.43 488.235   2
  23  -1  13 298.022 165.976   2
  23   1  13 300.815 195.972   2
  23  -1  14 30609.4 1333.87   2
  23   1  14 31188.5 1393.86   2
  23  -1  15 8893.68 723.438   2
  23   1  15 8155.09 720.441   2
  23  -1  16 26661.1 1146.20   2
  23   1  16 27854.2 1213.53   2
  23   1  17 6749.72 564.980   2
  23   1  18 121.353 118.402   2
 -23  -3   0 21.4352 184.941   1
  23   3   0-26.3991 230.569   3
  23  -3   0 284.326 191.854   3
 -23  -3   1 7590.59 608.239   1
  23   3   1 7468.36 698.331   3
  23   3  -1 7838.65 723.083   3
  23  -3   1 7145.62 678.443   3
  23  -3  -1 7943.41 690.766   3
 -23  -3  -1 7577.67 603.947   1
 -23  -3   2 1629.72 309.270   1
 -23  -3  -2 888.227 223.873   1
  23   3   2 980.609 319.483   3
  23   3  -2 909.531 263.903   3
  23  -3   2 1394.59 359.542   3
  23  -3  -2 1280.02 319.336   3
 -23  -3   3 4438.11 496.208   1
  23   3   3 4218.80 548.066   3
  23   3  -3 3259.20 490.897   3
  23  -3  -3 4197.01 533.611   3
  23  -3   3 4062.04 580.481   3
  23   3   4 716.356 240.064   3
  23   3  -4 407.522 219.621   3
  23  -3   4 423.135 249.507   3
  23  -3  -4 585.993 261.340   3
 -23  -3   4 620.444 245.482   1
 -23  -3   5 5020.84 520.171   1
  23   3   5 4551.28 509.150   3
  23   3  -5 3566.96 464.588   3
  23  -3  -5 4923.71 561.037   3
  23  -3   5 4636.50 607.800   3
 -23  -3   6 5344.79 542.930   1
  23   3   6 5176.21 547.170   3
  23  -3   6 5306.44 633.682   3
  23  -3  -6 5074.89 583.601   3
 -23  -3   7 3732.15 473.691   1
  23  -3   7 2656.40 447.266   3
  23  -3  -7 3428.67 489.550   3
 -23  -3   8 8266.54 729.471   1
 -23  -3   9 7544.15 730.494   1
  23  -3   9 6470.13 590.674   2
  23   3   9 6867.66 637.130   2
 -23  -3  10 3144.11 497.007   1
  23  -3  10 3532.67 459.496   2
  23   3  10 2750.61 417.023   2
 -23  -3  11 36.0110 182.923   1
  23  -3  11-17.3065 166.368   2
  23   3  11 78.2522 203.025   2
  23  -3  12 18349.4 1031.96   2
  23   3  12 18685.2 1106.58   2
  23  -3  13 326.254 193.359   2
  23   3  13 529.081 238.245   2
  23   3  14 485.887 220.712   2
  23   3  15 2156.07 383.190   2
  23   3  16 2247.70 373.993   2
  23   3  17 486.118 180.411   2
  23   3  18-196.091 177.291   2
  23   5   0 1901.66 422.905   3
  23  -5   0 1823.81 387.926   3
 -23  -5   0 2313.39 390.410   1
 -23  -5  -1 271288. 3578.24   1
  23   5   1 272252. 4075.53   3
  23   5  -1 264680. 3996.14   3
  23  -5   1 268001. 3985.13   3
  23  -5  -1 265964. 3831.06   3
 -23  -5   1 279420. 3702.43   1
  23   5   2 4315.91 531.534   3
  23   5  -2 3749.80 507.541   3
 -23  -5  -2 4663.87 476.754   1
  23  -5   2 4230.96 563.201   3
  23  -5  -2 4673.27 535.056   3
 -23  -5   2 4990.94 547.296   1
 -23  -5  -3 15039.3 875.664   1
  23   5   3 13137.3 909.314   3
  23   5  -3 11111.0 806.536   3
  23  -5   3 13618.1 979.903   3
  23  -5  -3 12941.3 849.504   3
 -23  -5   3 13192.4 853.503   1
  23   5  -4 5656.16 579.840   3
  23  -5   4 6538.65 755.435   3
 -23  -5   4 7216.07 660.827   1
  23  -5  -4 6852.80 633.449   3
  23  -5   5 41383.7 1791.04   3
 -23  -5   5 43258.6 1562.02   1
  23  -5  -5 43382.0 1579.66   3
  23  -5   6 5628.26 684.213   3
  23  -5  -6 6719.23 653.584   3
 -23  -5   6 6515.10 639.811   1
 -23  -5   7 619.701 276.552   1
  23  -5   7 773.982 333.881   3
  23  -5  -7 616.204 248.182   3
  23   5   8 11218.4 780.881   2
 -23  -5   8 11148.6 867.692   1
  23   5   9 5491.72 564.022   2
 -23  -5   9 5277.59 636.606   1
 -23  -5  10 60761.8 2186.67   1
  23   5  10 61410.0 1903.49   2
 -23  -5  11 817.101 310.368   1
  23   5  11 1391.87 372.370   2
  23   5  12 16165.3 1025.30   2
  23   5  13-513.676 322.224   2
  23   5  14-96.5265 285.141   2
  23   5  15 2458.38 404.123   2
  23   5  16 5908.71 581.708   2
  23   5  17 110.795 154.227   2
  23   5  18 370.872 133.386   2
 -23  -7   0 5225.16 597.231   1
  23  -7   0 4516.53 614.745   3
 -23  -7   1 142902. 2797.05   1
  23  -7   1 141774. 2948.25   3
  23  -7  -1 145003. 2897.67   3
 -23  -7  -1 144852. 2697.91   1
 -23  -7  -2 2207.86 345.596   1
 -23  -7   2 2337.40 350.571   1
  23  -7   2 2284.43 434.166   3
  23  -7  -2 2424.99 391.396   3
 -23  -7   3-90.1540 246.311   1
  23  -7   3 249.697 333.427   3
  23  -7  -3-150.952 247.553   3
 -23  -7   4 12093.2 857.263   1
  23  -7   4 12484.9 1010.45   3
  23  -7  -4 13227.0 902.157   3
 -23  -7   5 32865.9 1425.41   1
  23  -7   5 34379.4 1669.98   3
  23  -7  -5 33827.7 1422.65   3
 -23  -7   6 28159.6 1339.26   1
  23  -7   6 28157.8 1542.30   3
  23  -7  -6 31235.4 1382.10   3
 -23  -7   7 8818.45 761.255   1
  23  -7  -7 9780.18 809.811   3
  23   7   8 3213.99 447.237   2
  23  -7  -8 3222.10 512.269   3
 -23  -7   8 2219.40 401.983   1
 -23  -7   9 3515.13 545.927   1
  23   7   9 3900.51 499.928   2
  23   7  10 104344. 2513.37   2
 -23  -7  10 93276.1 2775.15   1
  23   7  11 2013.65 400.730   2
  23   7  12 18906.2 1096.28   2
  23   7  13-377.978 335.369   2
  23   7  14 2449.87 398.757   2
  23   7  15 3993.72 500.380   2
  23   7  16 8872.80 670.866   2
  23   7  17 20.5268 127.491   2
 -23  -9   0 261.649 184.541   1
  23  -9   0 174.544 263.416   3
 -23  -9   1 47308.5 1692.95   1
 -23  -9  -1 48262.3 1652.63   1
  23  -9   1 47217.8 1758.94   3
 -23  -9   2 237.210 201.061   1
  23  -9   2 355.839 219.573   3
 -23  -9   3 4678.85 567.136   1
  23  -9   3 5316.02 652.073   3
 -23  -9   4 441.452 202.818   1
  23  -9   4 372.372 343.345   3
 -23  -9   5 301.997 175.056   1
  23  -9   5 577.140 325.705   3
 -23  -9   6 4044.30 542.469   1
  23  -9   6 3994.68 602.140   3
 -23  -9   7 4586.57 588.989   1
  23   9   7 5038.78 543.283   2
  23  -9  -7 5162.95 599.263   3
 -23  -9   8-181.443 311.169   1
  23  -9  -8-38.6541 269.240   3
  23   9   8 32.9942 185.063   2
 -23  -9   9 4066.10 578.573   1
  23   9   9 5093.71 557.824   2
  23  -9  -9 5041.45 626.100   3
  23   9  10 18153.9 1053.85   2
  23   9  11 394.620 248.050   2
  23   9  12 18173.9 1047.55   2
  23   9  13 289.584 178.739   2
  23   9  14 121.873 176.578   2
  23   9  15 242.745 181.683   2
  23   9  16 1387.79 270.840   2
  23   9  17 744.521 187.173   2
 -23 -11   0 183.386 193.136   1
 -23 -11   1 11033.1 873.137   1
  23 -11   1 12158.6 951.133   3
 -23 -11   2 1088.73 322.865   1
  23 -11   2 942.121 348.858   3
 -23 -11   3 23607.0 1342.99   1
  23 -11   3 25786.7 1391.44   3
 -23 -11   4 15326.2 1095.77   1
  23 -11   4 16882.7 1183.73   3
 -23 -11   5 39083.2 1755.12   1
  23  11   5 38741.9 1449.92   2
 -23 -11   6 11704.8 971.935   1
  23  11   6 12803.0 867.011   2
 -23 -11   7 4636.63 619.626   1
  23  11   7 5078.60 557.428   2
  23 -11  -8 1038.64 262.086   3
  23  11   8 1105.70 289.451   2
  23  11   9 98.2621 207.893   2
  23 -11  -9 274.924 235.242   3
  23  11  10 10393.4 802.357   2
  23  11  11 109.724 188.013   2
  23  11  12-152.840 188.771   2
  23  11  13 541.678 222.671   2
  23  11  14 25159.9 1114.40   2
  23  11  15 8785.27 634.410   2
  23  11  16 16367.9 774.047   2
  23  13   0 255.526 177.618   4
  23  13   1 5524.92 514.212   4
 -23 -13   1 4991.20 656.077   1
 -23 -13   2-69.9243 259.111   1
  23  13   2 71.2239 164.019   4
  23 -13   2-527.476 384.812   3
  23  13   3 25719.0 1124.20   4
 -23 -13   3 23463.9 1408.93   1
  23 -13   3 26910.4 1473.16   3
  23  13   4 14973.7 869.416   4
 -23 -13   4 14066.7 1115.64   1
  23 -13   4 15709.0 1143.86   3
  23  13   5 19144.1 984.342   4
 -23 -13   5 17393.3 1221.56   1
  23 -13   5 21195.9 1354.61   3
  23  13   5 20947.9 1092.15   2
  23  13   6 39902.8 1436.32   4
  23  13   6 43896.8 1586.04   2
  23  13   7 13933.2 869.596   4
  23  13   7 14623.4 932.099   2
  23  13   8 432.088 198.938   4
  23  13   8-55.1158 190.772   2
  23  13   9 2253.28 377.355   4
  23  13   9 1923.89 350.703   2
  23 -13  -9 2613.12 482.793   3
  23  13  10 17992.9 1012.90   4
  23  13  10 19056.4 1051.95   2
  23 -13 -10 19796.6 1215.57   3
  23  13  11 654.787 225.716   4
  23  13  11 243.630 165.103   2
  23  13  12 276.317 166.503   2
  23  13  13 308.880 198.195   2
  23  13  14 26305.1 1054.04   2
  23  13  15 7807.22 540.569   2
  23  15   0 66.5151 172.022   4
  23  15   1 332.080 191.734   4
  23  15  -1 195.930 140.844   4
  23  15   2 355.691 231.487   4
  23 -15   2-35.7352 320.241   3
  23  15   3 5012.15 543.273   4
  23 -15   3 3762.40 581.132   3
  23  15   4 1050.74 238.607   4
  23 -15   4 758.638 329.222   3
  23  15   5 13077.6 815.275   4
  23 -15   5 13521.1 1104.26   3
[truncated: 512,235 more chars]
