# Supplementary material
Source: publisher figshare collection journal article supplement (https://acs.figshare.com/ndownloader/files/16775912)
Supplement: Supplementary file 1 [file 16775912 › LIFM-114-solved.cif]

data_LIFM-114
_audit_creation_date              2017-12-03
_audit_creation_method
;
Olex2 1.2
(compiled 2017.03.02 svn.r3394 for OlexSys, GUI svn.r5381)
;
_shelx_SHELXL_version_number      '2014/7'
_publ_contact_author_address      ?
_publ_contact_author_email        ?
_publ_contact_author_id_orcid     ?
_publ_contact_author_name         ''
_publ_contact_author_phone        ?
_publ_section_references
;
Dolomanov, O.V., Bourhis, L.J., Gildea, R.J, Howard, J.A.K. & Puschmann, H.
 (2009), J. Appl. Cryst. 42, 339-341.

Sheldrick, G.M. (2015). Acta Cryst. C71, 3-8.
;
_chemical_name_common             LIFM-114
_chemical_name_systematic         ?
_chemical_formula_moiety          'C108 H64 O32 Zr6 [+ solvent]'
_chemical_formula_sum             'C108 H64 O32 Zr6'
_chemical_formula_weight          2420.91
_chemical_melting_point           ?
loop_
  _atom_type_symbol
  _atom_type_description
  _atom_type_scat_dispersion_real
  _atom_type_scat_dispersion_imag
  _atom_type_scat_source
 'C' 'C' 0.0181 0.0091 'International Tables Vol C Tables 4.2.6.8 and 6.1.1.4'
 'H' 'H' 0.0000 0.0000 'International Tables Vol C Tables 4.2.6.8 and 6.1.1.4'
 'O' 'O' 0.0492 0.0322 'International Tables Vol C Tables 4.2.6.8 and 6.1.1.4'
 'Zr' 'Zr' -0.1862 2.2449
 'International Tables Vol C Tables 4.2.6.8 and 6.1.1.4'

_shelx_space_group_comment
;
The symmetry employed for this shelxl refinement is uniquely defined
by the following loop, which should always be used as a source of
symmetry information in preference to the above space-group names.
They are only intended as comments.
;
_space_group_crystal_system       'orthorhombic'
_space_group_IT_number            69
_space_group_name_H-M_alt         'F m m m'
_space_group_name_Hall            '-F 2 2'
loop_
  _space_group_symop_operation_xyz
 'x, y, z'
 '-x, -y, z'
 'x, -y, -z'
 '-x, y, -z'
 'x, y+1/2, z+1/2'
 '-x, -y+1/2, z+1/2'
 'x, -y+1/2, -z+1/2'
 '-x, y+1/2, -z+1/2'
 'x+1/2, y, z+1/2'
 '-x+1/2, -y, z+1/2'
 'x+1/2, -y, -z+1/2'
 '-x+1/2, y, -z+1/2'
 'x+1/2, y+1/2, z'
 '-x+1/2, -y+1/2, z'
 'x+1/2, -y+1/2, -z'
 '-x+1/2, y+1/2, -z'
 '-x, -y, -z'
 'x, y, -z'
 '-x, y, z'
 'x, -y, z'
 '-x, -y+1/2, -z+1/2'
 'x, y+1/2, -z+1/2'
 '-x, y+1/2, z+1/2'
 'x, -y+1/2, z+1/2'
 '-x+1/2, -y, -z+1/2'
 'x+1/2, y, -z+1/2'
 '-x+1/2, y, z+1/2'
 'x+1/2, -y, z+1/2'
 '-x+1/2, -y+1/2, -z'
 'x+1/2, y+1/2, -z'
 '-x+1/2, y+1/2, z'
 'x+1/2, -y+1/2, z'

_cell_length_a                    16.0688(7)
_cell_length_b                    28.8004(15)
_cell_length_c                    41.0306(17)
_cell_angle_alpha                 90
_cell_angle_beta                  90
_cell_angle_gamma                 90
_cell_volume                      18988.5(15)
_cell_formula_units_Z             4
_cell_measurement_reflns_used     4646
_cell_measurement_temperature     150(2)
_cell_measurement_theta_max       63.5190
_cell_measurement_theta_min       4.5110
_shelx_estimated_absorpt_T_max    ?
_shelx_estimated_absorpt_T_min    ?
_exptl_absorpt_coefficient_mu     2.976
_exptl_absorpt_correction_T_max   1.00000
_exptl_absorpt_correction_T_min   0.43241
_exptl_absorpt_correction_type    multi-scan
_exptl_absorpt_process_details
;
CrysAlisPro 1.171.38.43 (Rigaku Oxford Diffraction, 2015)
Empirical absorption correction using spherical harmonics,
 implemented in SCALE3 ABSPACK scaling algorithm.
;
_exptl_absorpt_special_details    ?
_exptl_crystal_colour             Colourless
_exptl_crystal_density_diffrn     0.847
_exptl_crystal_density_meas       ?
_exptl_crystal_density_method     ?
_exptl_crystal_description        Rod
_exptl_crystal_F_000              4832
_exptl_crystal_size_max           0.3
_exptl_crystal_size_mid           0.1
_exptl_crystal_size_min           0.1
_exptl_transmission_factor_max    ?
_exptl_transmission_factor_min    ?
_diffrn_reflns_av_R_equivalents   0.0239
_diffrn_reflns_av_unetI/netI      0.0224
_diffrn_reflns_Laue_measured_fraction_full 0.966
_diffrn_reflns_Laue_measured_fraction_max 0.966
_diffrn_reflns_limit_h_max        17
_diffrn_reflns_limit_h_min        -18
_diffrn_reflns_limit_k_max        32
_diffrn_reflns_limit_k_min        -24
_diffrn_reflns_limit_l_max        29
_diffrn_reflns_limit_l_min        -47
_diffrn_reflns_number             9705
_diffrn_reflns_point_group_measured_fraction_full 0.966
_diffrn_reflns_point_group_measured_fraction_max 0.966
_diffrn_reflns_theta_full         63.438
_diffrn_reflns_theta_max          63.438
_diffrn_reflns_theta_min          3.329
_diffrn_ambient_environment       N~2~
_diffrn_ambient_temperature       150(2)
_diffrn_detector                  'CCD plate'
_diffrn_detector_area_resol_mean  10.6525
_diffrn_detector_type             Atlas
_diffrn_measured_fraction_theta_full 0.966
_diffrn_measured_fraction_theta_max 0.966
_diffrn_measurement_details
;
List of Runs (angles in degrees, time in seconds):

  # Type    Start    End  Width  t~exp~   \w     \q     \k     \f   Frames
--------------------------------------------------------------------------
  1  \w    -45.00  31.00   1.00   17.00    --  -40.77  38.00 150.00   76
  2  \w    -71.00 -38.00   1.00   17.00    --  -40.77 178.00-120.00   33
  3  \w    117.00 162.00   1.00   18.00    --   86.42  30.00  90.00   45
  4  \w     64.00  90.00   1.00   18.00    --   86.42  30.00  90.00   26
  5  \w     97.00 128.00   1.00   18.00    --   86.42 125.00   0.00   31
  6  \w     59.00 158.00   1.00   18.00    --   86.42  61.00 150.00   99
  7  \w     82.00 108.00   1.00   18.00    --   86.42 -61.00-180.00   26
;
_diffrn_measurement_device        'four-circle diffractometer'
_diffrn_measurement_device_type   'SuperNova, Dual, Cu at zero, Atlas'
_diffrn_measurement_method        '\w scans'
_diffrn_orient_matrix_type
'CrysAlisPro convention (1999,Acta A55,543-557)'
_diffrn_orient_matrix_UB_11       0.0808049000
_diffrn_orient_matrix_UB_12       0.0260401000
_diffrn_orient_matrix_UB_13       -0.0085445000
_diffrn_orient_matrix_UB_21       0.0442175000
_diffrn_orient_matrix_UB_22       -0.0234227000
_diffrn_orient_matrix_UB_23       0.0289844000
_diffrn_orient_matrix_UB_31       0.0265871000
_diffrn_orient_matrix_UB_32       -0.0403681000
_diffrn_orient_matrix_UB_33       -0.0223445000
_diffrn_radiation_monochromator   mirror
_diffrn_radiation_probe           x-ray
_diffrn_radiation_type            CuK\a
_diffrn_radiation_wavelength      1.54184
_diffrn_source                    'micro-focus sealed X-ray tube'
_diffrn_source_type               'SuperNova (Cu) X-ray Source'
_reflns_Friedel_coverage          0.000
_reflns_Friedel_fraction_full     .
_reflns_Friedel_fraction_max      .
_reflns_number_gt                 3699
_reflns_number_total              4062
_reflns_odcompleteness_completeness 98.85
_reflns_odcompleteness_iscentric  1
_reflns_odcompleteness_theta      59.94
_reflns_special_details
;
 Reflections were merged by SHELXL according to the crystal
 class for the calculation of statistics and refinement.
 
 Structure factors included contributions from the .fab file.
 
 _reflns_Friedel_fraction is defined as the number of unique
 Friedel pairs measured divided by the number that would be
 possible theoretically, ignoring centric projections and
 systematic absences.
;
_reflns_threshold_expression      'I > 2\s(I)'
_computing_cell_refinement        'CrysAlisPro 1.171.38.43 (Rigaku OD, 2015)'
_computing_data_collection        'CrysAlisPro 1.171.38.43 (Rigaku OD, 2015)'
_computing_data_reduction         'CrysAlisPro 1.171.38.43 (Rigaku OD, 2015)'
_computing_molecular_graphics     'Olex2 (Dolomanov et al., 2009)'
_computing_publication_material   'Olex2 (Dolomanov et al., 2009)'
_computing_structure_refinement   'ShelXL (Sheldrick, 2015)'
_computing_structure_solution     ?
_refine_diff_density_max          1.002
_refine_diff_density_min          -1.033
_refine_diff_density_rms          0.094
_refine_ls_extinction_coef        .
_refine_ls_extinction_method      none
_refine_ls_goodness_of_fit_ref    1.130
_refine_ls_hydrogen_treatment     constr
_refine_ls_matrix_type            full
_refine_ls_number_parameters      211
_refine_ls_number_reflns          4062
_refine_ls_number_restraints      6
_refine_ls_R_factor_all           0.0474
_refine_ls_R_factor_gt            0.0444
_refine_ls_restrained_S_all       1.140
_refine_ls_shift/su_max           0.001
_refine_ls_shift/su_mean          0.000
_refine_ls_structure_factor_coef  Fsqd
_refine_ls_weighting_details
'w=1/[\s^2^(Fo^2^)+(0.0832P)^2^+129.0627P] where P=(Fo^2^+2Fc^2^)/3'
_refine_ls_weighting_scheme       calc
_refine_ls_wR_factor_gt           0.1427
_refine_ls_wR_factor_ref          0.1457
_refine_special_details           ?
_olex2_refinement_description
;
1. Fixed Uiso
 At 1.2 times of:
  All C(H) groups
2. Uiso/Uaniso restraints and constraints
Uanis(O4) \\sim Ueq: with sigma of 0.01 and sigma for terminal atoms of 0.02
3. Others
 Fixed Sof: C9(0.5) H9(0.5) C10(0.5) H10(0.5) C12(0.5) H12(0.5) C13(0.5)
 H13(0.5) C9A(0.5) H9A(0.5) C10A(0.5) H10A(0.5) C12A(0.5) H12A(0.5) C13A(0.5)
 H13A(0.5)
4.a Aromatic/amide H refined with riding coordinates:
 C3(H3), C4(H4), C6(H6), C7(H7), C9(H9), C10(H10), C12(H12), C13(H13),
 C9A(H9A), C10A(H10A), C12A(H12A), C13A(H13A)
;
_atom_sites_solution_hydrogens    geom
_atom_sites_solution_primary      ?
_atom_sites_solution_secondary    ?
loop_
  _atom_site_label
  _atom_site_type_symbol
  _atom_site_fract_x
  _atom_site_fract_y
  _atom_site_fract_z
  _atom_site_U_iso_or_equiv
  _atom_site_adp_type
  _atom_site_occupancy
  _atom_site_site_symmetry_order
  _atom_site_calc_flag
  _atom_site_refinement_flags_posn
  _atom_site_refinement_flags_adp
  _atom_site_refinement_flags_occupancy
  _atom_site_disorder_assembly
  _atom_site_disorder_group
 Zr1 Zr 0.0000 0.5000 0.05987(2) 0.01768(18) Uani 1 4 d S T P . .
 Zr2 Zr -0.11004(3) 0.56127(2) 0.0000 0.02666(18) Uani 1 2 d S T P . .
 O1 O -0.08277(16) 0.54592(9) 0.08751(6) 0.0308(6) Uani 1 1 d . . . . .
 O2 O -0.1531(2) 0.58567(12) 0.04950(7) 0.0570(10) Uani 1 1 d . . . . .
 O3 O -0.1116(4) 0.5000 0.02901(12) 0.0696(18) Uani 1 2 d S T P . .
 O4 O 0.0000 0.5617(2) 0.02926(11) 0.0647(16) Uani 1 2 d S TU P . .
 O5 O -0.2466(3) 0.55899(19) 0.0000 0.0601(14) Uani 1 2 d S T P . .
 O6 O -0.1021(4) 0.63776(15) 0.0000 0.0631(15) Uani 1 2 d S T P . .
 C1 C -0.1360(3) 0.57537(15) 0.07855(9) 0.0395(10) Uani 1 1 d . . . . .
 C2 C -0.1824(3) 0.60039(16) 0.10474(10) 0.0462(11) Uani 1 1 d . . . . .
 C3 C -0.1842(4) 0.5840(2) 0.13611(12) 0.083(2) Uani 1 1 d . . . . .
 H3 H -0.1555 0.5562 0.1414 0.100 Uiso 1 1 calc R . . . .
 C4 C -0.2276(4) 0.6076(2) 0.16004(12) 0.087(2) Uani 1 1 d . . . . .
 H4 H -0.2288 0.5955 0.1816 0.104 Uiso 1 1 calc R . . . .
 C5 C -0.2687(3) 0.64815(17) 0.15339(10) 0.0497(12) Uani 1 1 d . . . . .
 C6 C -0.2634(5) 0.6654(2) 0.12248(13) 0.092(2) Uani 1 1 d . . . . .
 H6 H -0.2881 0.6945 0.1177 0.111 Uiso 1 1 calc R . . . .
 C7 C -0.2228(5) 0.6414(2) 0.09785(13) 0.092(2) Uani 1 1 d . . . . .
 H7 H -0.2229 0.6532 0.0762 0.111 Uiso 1 1 calc R . . . .
 C8 C -0.3155(3) 0.67379(18) 0.17916(11) 0.0515(12) Uani 1 1 d . . . . .
 C9 C -0.3616(8) 0.6502(4) 0.2024(3) 0.070(3) Uani 0.5 1 d . . . A 1
 H9 H -0.3608 0.6172 0.2028 0.084 Uiso 0.5 1 calc R . . A 1
 C10 C -0.4093(7) 0.6743(4) 0.2253(3) 0.065(3) Uani 0.5 1 d . . . A 1
 H10 H -0.4426 0.6578 0.2406 0.078 Uiso 0.5 1 calc R . . A 1
 C11 C -0.4078(2) 0.72333(18) 0.22560(10) 0.0475(12) Uani 1 1 d . . . . .
 C12 C -0.3507(6) 0.7444(4) 0.2063(3) 0.068(3) Uani 0.5 1 d . . . A 1
 H12 H -0.3414 0.7768 0.2087 0.082 Uiso 0.5 1 calc R . . A 1
 C13 C -0.3051(6) 0.7199(4) 0.1830(3) 0.072(4) Uani 0.5 1 d . . . A 1
 H13 H -0.2662 0.7359 0.1697 0.086 Uiso 0.5 1 calc R . . A 1
 C14 C -0.4581(4) 0.7500 0.2500 0.0489(16) Uani 1 2 d S T P A .
 C9A C -0.3027(6) 0.6700(3) 0.2110(2) 0.045(2) Uani 0.5 1 d . . . A 2
 H9A H -0.2609 0.6492 0.2184 0.054 Uiso 0.5 1 calc R . . A 2
 C10A C -0.3475(5) 0.6948(3) 0.2340(2) 0.045(2) Uani 0.5 1 d . . . A 2
 H10A H -0.3344 0.6911 0.2564 0.054 Uiso 0.5 1 calc R . . A 2
 C12A C -0.4274(5) 0.7296(4) 0.1922(2) 0.056(3) Uani 0.5 1 d . . . A 2
 H12A H -0.4709 0.7501 0.1859 0.067 Uiso 0.5 1 calc R . . A 2
 C13A C -0.3819(6) 0.7055(4) 0.1685(2) 0.059(3) Uani 0.5 1 d . . . A 2
 H13A H -0.3937 0.7094 0.1460 0.070 Uiso 0.5 1 calc R . . A 2

loop_
  _atom_site_aniso_label
  _atom_site_aniso_U_11
  _atom_site_aniso_U_22
  _atom_site_aniso_U_33
  _atom_site_aniso_U_23
  _atom_site_aniso_U_13
  _atom_site_aniso_U_12
 Zr1 0.0192(3) 0.0277(3) 0.0062(3) 0.000 0.000 0.000
 Zr2 0.0296(3) 0.0397(3) 0.0107(3) 0.000 0.000 0.01455(18)
 O1 0.0326(14) 0.0440(15) 0.0158(12) -0.0027(11) 0.0046(11) 0.0085(12)
 O2 0.071(2) 0.080(2) 0.0199(15) -0.0012(14) 0.0031(14) 0.0477(19)
 O3 0.126(5) 0.039(2) 0.043(3) 0.000 -0.060(3) 0.000
 O4 0.037(2) 0.123(4) 0.034(2) 0.050(3) 0.000 0.000
 O5 0.029(2) 0.110(4) 0.041(2) 0.000 0.000 0.027(2)
 O6 0.111(4) 0.041(2) 0.037(2) 0.000 0.000 0.026(3)
 C1 0.047(2) 0.054(2) 0.018(2) -0.0054(18) 0.0078(17) 0.018(2)
 C2 0.055(3) 0.061(3) 0.023(2) -0.0080(19) 0.0082(19) 0.022(2)
 C3 0.111(5) 0.109(5) 0.029(3) 0.001(3) 0.016(3) 0.066(4)
 C4 0.111(5) 0.119(5) 0.030(3) -0.006(3) 0.019(3) 0.058(4)
 C5 0.050(3) 0.067(3) 0.031(2) -0.019(2) 0.011(2) 0.016(2)
 C6 0.124(6) 0.104(5) 0.050(3) -0.006(3) 0.027(4) 0.073(4)
 C7 0.122(6) 0.114(5) 0.041(3) 0.003(3) 0.026(3) 0.074(5)
 C8 0.039(2) 0.074(3) 0.042(3) -0.027(2) 0.010(2) 0.007(2)
 C9 0.087(9) 0.069(7) 0.053(6) -0.016(5) 0.041(7) 0.019(7)
 C10 0.056(6) 0.080(7) 0.059(7) -0.030(6) 0.022(5) 0.003(6)
 C11 0.0238(19) 0.082(3) 0.036(2) -0.038(2) 0.0028(18) -0.003(2)
 C12 0.045(5) 0.068(7) 0.092(9) -0.047(6) 0.025(6) -0.009(5)
 C13 0.050(6) 0.085(8) 0.079(8) -0.047(6) 0.035(6) -0.019(6)
 C14 0.026(3) 0.081(4) 0.040(3) -0.040(3) 0.000 0.000
 C9A 0.034(4) 0.065(6) 0.036(5) -0.016(4) 0.005(4) 0.005(4)
 C10A 0.035(5) 0.072(6) 0.027(4) -0.023(4) 0.003(4) 0.006(5)
 C12A 0.032(4) 0.099(8) 0.037(5) -0.033(5) 0.002(4) 0.018(5)
 C13A 0.045(5) 0.100(8) 0.030(5) -0.032(5) -0.003(4) 0.024(5)

_geom_special_details
;
 All esds (except the esd in the dihedral angle between two l.s. planes)
 are estimated using the full covariance matrix.  The cell esds are taken
 into account individually in the estimation of esds in distances, angles
 and torsion angles; correlations between esds in cell parameters are only
 used when they are defined by crystal symmetry.  An approximate (isotropic)
 treatment of cell esds is used for estimating esds involving l.s. planes.
;
loop_
  _geom_bond_atom_site_label_1
  _geom_bond_atom_site_label_2
  _geom_bond_distance
  _geom_bond_site_symmetry_2
  _geom_bond_publ_flag
 Zr1 Zr2 3.5036(4) . ?
 Zr1 Zr2 3.5036(4) 17_565 ?
 Zr1 Zr2 3.5036(4) 3_565 ?
 Zr1 Zr2 3.5036(4) 19 ?
 Zr1 O1 2.192(2) 20_565 ?
 Zr1 O1 2.192(2) 19 ?
 Zr1 O1 2.192(2) 2_565 ?
 Zr1 O1 2.192(2) . ?
 Zr1 O3 2.195(5) 2_565 ?
 Zr1 O3 2.195(5) . ?
 Zr1 O4 2.175(4) . ?
 Zr1 O4 2.175(4) 2_565 ?
 Zr2 Zr1 3.5035(4) 17_565 ?
 Zr2 Zr2 3.5292(9) 3_565 ?
 Zr2 Zr2 3.5364(8) 19 ?
 Zr2 O2 2.258(3) . ?
 Zr2 O2 2.258(3) 18 ?
 Zr2 O3 2.128(3) 18 ?
 Zr2 O3 2.129(3) . ?
 Zr2 O4 2.137(3) 18 ?
 Zr2 O4 2.137(3) . ?
 Zr2 O5 2.195(4) . ?
 Zr2 O6 2.207(5) . ?
 O1 C1 1.260(5) . ?
 O2 C1 1.259(5) . ?
 O3 Zr2 2.129(3) 3_565 ?
 O4 Zr2 2.137(3) 19 ?
 C1 C2 1.494(5) . ?
 C2 C3 1.371(7) . ?
 C2 C7 1.376(7) . ?
 C3 C4 1.383(7) . ?
 C4 C5 1.368(7) . ?
 C5 C6 1.364(7) . ?
 C5 C8 1.493(5) . ?
 C6 C7 1.387(7) . ?
 C8 C9 1.387(12) . ?
 C8 C13 1.347(12) . ?
 C8 C9A 1.327(10) . ?
 C8 C13A 1.471(11) . ?
 C9 C10 1.397(13) . ?
 C10 C11 1.412(13) . ?
 C11 C12 1.356(12) . ?
 C11 C14 1.498(5) . ?
 C11 C10A 1.316(10) . ?
 C11 C12A 1.419(10) . ?
 C12 C13 1.394(13) . ?
 C14 C11 1.498(5) 7_565 ?
 C14 C14 1.347(11) 21_465 ?
 C9A C10A 1.383(11) . ?
 C12A C13A 1.401(12) . ?

loop_
  _geom_angle_atom_site_label_1
  _geom_angle_atom_site_label_2
  _geom_angle_atom_site_label_3
  _geom_angle
  _geom_angle_site_symmetry_1
  _geom_angle_site_symmetry_3
  _geom_angle_publ_flag
 Zr2 Zr1 Zr2 90.958(15) . 17_565 ?
 Zr2 Zr1 Zr2 60.484(15) 17_565 19 ?
 Zr2 Zr1 Zr2 90.959(15) 3_565 19 ?
 Zr2 Zr1 Zr2 60.620(15) 3_565 17_565 ?
 Zr2 Zr1 Zr2 60.620(15) . 19 ?
 Zr2 Zr1 Zr2 60.483(15) . 3_565 ?
 O1 Zr1 Zr2 75.68(6) . . ?
 O1 Zr1 Zr2 166.64(6) . 17_565 ?
 O1 Zr1 Zr2 111.42(7) . 19 ?
 O1 Zr1 Zr2 111.42(7) 19 . ?
 O1 Zr1 Zr2 111.41(7) 20_565 17_565 ?
 O1 Zr1 Zr2 111.13(7) 20_565 . ?
 O1 Zr1 Zr2 166.64(6) 20_565 19 ?
 O1 Zr1 Zr2 166.64(6) 2_565 . ?
 O1 Zr1 Zr2 111.13(7) 19 17_565 ?
 O1 Zr1 Zr2 111.13(7) . 3_565 ?
 O1 Zr1 Zr2 75.68(6) 2_565 17_565 ?
 O1 Zr1 Zr2 166.64(6) 19 3_565 ?
 O1 Zr1 Zr2 75.68(6) 19 19 ?
 O1 Zr1 Zr2 75.68(6) 20_565 3_565 ?
 O1 Zr1 Zr2 111.41(7) 2_565 3_565 ?
 O1 Zr1 Zr2 111.13(7) 2_565 19 ?
 O1 Zr1 O1 74.23(14) . 20_565 ?
 O1 Zr1 O1 74.72(14) 20_565 2_565 ?
 O1 Zr1 O1 74.72(14) . 19 ?
 O1 Zr1 O1 117.69(13) 19 20_565 ?
 O1 Zr1 O1 117.69(13) . 2_565 ?
 O1 Zr1 O1 74.23(14) 19 2_565 ?
 O1 Zr1 O3 142.58(7) . 2_565 ?
 O1 Zr1 O3 142.57(7) 19 . ?
 O1 Zr1 O3 78.63(14) . . ?
 O1 Zr1 O3 78.63(14) 19 2_565 ?
 O1 Zr1 O3 142.57(7) 2_565 . ?
 O1 Zr1 O3 142.58(7) 20_565 2_565 ?
 O1 Zr1 O3 78.63(14) 2_565 2_565 ?
 O1 Zr1 O3 78.63(14) 20_565 . ?
 O3 Zr1 Zr2 35.24(8) 2_565 19 ?
 O3 Zr1 Zr2 90.44(14) 2_565 . ?
 O3 Zr1 Zr2 35.24(8) 2_565 17_565 ?
 O3 Zr1 Zr2 35.24(8) . . ?
 O3 Zr1 Zr2 90.44(14) . 17_565 ?
 O3 Zr1 Zr2 35.24(8) . 3_565 ?
 O3 Zr1 Zr2 90.44(14) . 19 ?
 O3 Zr1 Zr2 90.43(14) 2_565 3_565 ?
 O3 Zr1 O3 109.5(3) . 2_565 ?
 O4 Zr1 Zr2 90.36(13) 2_565 19 ?
 O4 Zr1 Zr2 35.30(7) . 19 ?
 O4 Zr1 Zr2 90.36(13) 2_565 . ?
 O4 Zr1 Zr2 90.36(13) . 3_565 ?
 O4 Zr1 Zr2 35.30(7) 2_565 3_565 ?
 O4 Zr1 Zr2 35.30(7) . . ?
 O4 Zr1 Zr2 90.36(13) . 17_565 ?
 O4 Zr1 Zr2 35.30(7) 2_565 17_565 ?
 O4 Zr1 O1 78.83(14) . . ?
 O4 Zr1 O1 142.32(7) 2_565 . ?
 O4 Zr1 O1 142.32(7) 2_565 19 ?
 O4 Zr1 O1 78.82(14) 2_565 2_565 ?
 O4 Zr1 O1 78.82(14) . 19 ?
 O4 Zr1 O1 142.32(7) . 20_565 ?
 O4 Zr1 O1 78.82(14) 2_565 20_565 ?
 O4 Zr1 O1 142.32(7) . 2_565 ?
 O4 Zr1 O3 70.53(11) 2_565 2_565 ?
 O4 Zr1 O3 70.54(11) 2_565 . ?
 O4 Zr1 O3 70.54(11) . . ?
 O4 Zr1 O3 70.54(11) . 2_565 ?
 O4 Zr1 O4 109.5(3) . 2_565 ?
 Zr1 Zr2 Zr1 89.041(15) 17_565 . ?
 Zr1 Zr2 Zr2 59.758(8) 17_565 3_565 ?
 Zr1 Zr2 Zr2 59.759(8) . 3_565 ?
 Zr1 Zr2 Zr2 59.690(7) 17_565 19 ?
 Zr1 Zr2 Zr2 59.690(7) . 19 ?
 Zr2 Zr2 Zr2 90.0 3_565 19 ?
 O2 Zr2 Zr1 71.39(7) . . ?
 O2 Zr2 Zr1 160.43(7) 18 . ?
 O2 Zr2 Zr1 71.39(7) 18 17_565 ?
 O2 Zr2 Zr1 160.43(7) . 17_565 ?
 O2 Zr2 Zr2 107.86(9) . 19 ?
 O2 Zr2 Zr2 107.86(9) 18 19 ?
 O2 Zr2 Zr2 108.13(9) 18 3_565 ?
 O2 Zr2 Zr2 108.13(9) . 3_565 ?
 O2 Zr2 O2 128.18(14) 18 . ?
 O3 Zr2 Zr1 36.51(13) 18 17_565 ?
 O3 Zr2 Zr1 88.87(15) . 17_565 ?
 O3 Zr2 Zr1 36.51(13) . . ?
 O3 Zr2 Zr1 88.87(15) 18 . ?
 O3 Zr2 Zr2 34.00(11) 18 3_565 ?
 O3 Zr2 Zr2 34.00(11) . 3_565 ?
 O3 Zr2 Zr2 90.66(16) 18 19 ?
 O3 Zr2 Zr2 90.66(16) . 19 ?
 O3 Zr2 O2 139.23(14) 18 . ?
 O3 Zr2 O2 139.24(14) . 18 ?
 O3 Zr2 O2 75.61(15) . . ?
 O3 Zr2 O2 75.62(15) 18 18 ?
 O3 Zr2 O3 68.0(2) 18 . ?
 O3 Zr2 O4 109.1(2) . 18 ?
 O3 Zr2 O4 72.54(18) . . ?
 O3 Zr2 O4 72.54(18) 18 18 ?
 O3 Zr2 O4 109.1(2) 18 . ?
 O3 Zr2 O5 87.9(2) . . ?
 O3 Zr2 O5 87.9(2) 18 . ?
 O3 Zr2 O6 145.92(10) . . ?
 O3 Zr2 O6 145.92(10) 18 . ?
 O4 Zr2 Zr1 88.79(14) . 17_565 ?
 O4 Zr2 Zr1 36.03(12) 18 17_565 ?
 O4 Zr2 Zr1 88.79(14) 18 . ?
 O4 Zr2 Zr1 36.03(12) . . ?
 O4 Zr2 Zr2 34.17(10) 18 19 ?
 O4 Zr2 Zr2 90.30(15) . 3_565 ?
 O4 Zr2 Zr2 34.17(10) . 19 ?
 O4 Zr2 Zr2 90.30(15) 18 3_565 ?
 O4 Zr2 O2 139.23(14) . 18 ?
 O4 Zr2 O2 139.23(14) 18 . ?
 O4 Zr2 O2 75.34(14) 18 18 ?
 O4 Zr2 O2 75.34(14) . . ?
 O4 Zr2 O4 68.3(2) 18 . ?
 O4 Zr2 O5 145.81(10) . . ?
 O4 Zr2 O5 145.81(10) 18 . ?
 O4 Zr2 O6 86.9(2) . . ?
 O4 Zr2 O6 86.9(2) 18 . ?
 O5 Zr2 Zr1 119.30(8) . 17_565 ?
 O5 Zr2 Zr1 119.30(8) . . ?
 O5 Zr2 Zr2 88.29(14) . 3_565 ?
 O5 Zr2 Zr2 178.29(14) . 19 ?
 O5 Zr2 O2 72.71(11) . 18 ?
 O5 Zr2 O2 72.70(11) . . ?
 O5 Zr2 O6 95.0(2) . . ?
 O6 Zr2 Zr1 118.26(9) . 17_565 ?
 O6 Zr2 Zr1 118.26(9) . . ?
 O6 Zr2 Zr2 176.67(15) . 3_565 ?
 O6 Zr2 Zr2 86.67(15) . 19 ?
 O6 Zr2 O2 72.97(11) . . ?
 O6 Zr2 O2 72.97(11) . 18 ?
 C1 O1 Zr1 131.9(2) . . ?
 C1 O2 Zr2 135.3(3) . . ?
 Zr2 O3 Zr1 108.25(18) 3_565 . ?
 Zr2 O3 Zr1 108.25(18) . . ?
 Zr2 O3 Zr2 112.0(2) . 3_565 ?
 Zr2 O4 Zr1 108.67(17) 19 . ?
 Zr2 O4 Zr1 108.66(17) . . ?
 Zr2 O4 Zr2 111.7(2) 19 . ?
 O1 C1 C2 117.0(3) . . ?
 O2 C1 O1 125.7(3) . . ?
 O2 C1 C2 117.3(4) . . ?
 C3 C2 C1 121.3(4) . . ?
 C3 C2 C7 118.6(4) . . ?
 C7 C2 C1 120.1(4) . . ?
 C2 C3 C4 120.5(5) . . ?
 C5 C4 C3 121.4(5) . . ?
 C4 C5 C8 121.6(4) . . ?
 C6 C5 C4 117.7(4) . . ?
 C6 C5 C8 120.7(5) . . ?
 C5 C6 C7 121.7(5) . . ?
 C2 C7 C6 119.9(5) . . ?
 C9 C8 C5 120.9(6) . . ?
 C13 C8 C5 120.6(6) . . ?
 C13 C8 C9 117.9(7) . . ?
 C9A C8 C5 125.4(6) . . ?
 C9A C8 C13A 117.1(6) . . ?
 C13A C8 C5 117.5(5) . . ?
 C8 C9 C10 120.8(10) . . ?
 C9 C10 C11 119.5(10) . . ?
 C10 C11 C14 120.6(5) . . ?
 C12 C11 C10 117.0(7) . . ?
 C12 C11 C14 121.7(5) . . ?
 C10A C11 C14 122.9(5) . . ?
 C10A C11 C12A 119.7(6) . . ?
 C12A C11 C14 117.5(5) . . ?
 C11 C12 C13 121.9(9) . . ?
 C8 C13 C12 121.0(9) . . ?
 C11 C14 C11 114.8(5) . 7_565 ?
 C14 C14 C11 122.6(2) 21_465 7_565 ?
 C14 C14 C11 122.6(2) 21_465 . ?
 C8 C9A C10A 123.2(8) . . ?
 C11 C10A C9A 121.9(8) . . ?
 C13A C12A C11 119.4(8) . . ?
 C12A C13A C8 118.7(8) . . ?

_shelx_res_file
;
    exp_2043_sq.res created by SHELXL-2014/7

TITL exp_2043 in Fmmm
REM Fmmm (#69 in standard setting)
REM exp_2043 in Fmmm
REM 96 parameters refined using 0 restraints
REM Highest difference peak 4.101, deepest hole -7.574, 1-sigma level 0.396
CELL 1.54184 16.0688 28.8004 41.0306 90 90 90
ZERR 4 0.0007 0.0015 0.0017 0 0 0
LATT 4
SYMM -X,-Y,+Z
SYMM +X,-Y,-Z
SYMM -X,+Y,-Z
SFAC C H O Zr
UNIT 432 256 128 24
ISOR 0.01 0.02 O4

L.S. 20
PLAN  5
TEMP -100
GRID
ABIN
fmap 2
acta
MERG 2
REM <olex2.extras>
REM <HklSrc "%.\\exp_2043_sq.hkl">
REM </olex2.extras>

WGHT    0.083200  129.062698
FVAR       0.98157
ZR1   4    0.000000    0.500000    0.059873    10.25000    0.01921    0.02765 =
         0.00618    0.00000    0.00000    0.00000
ZR2   4   -0.110040    0.561269    0.000000    10.50000    0.02962    0.03969 =
         0.01066    0.00000    0.00000    0.01455
O1    3   -0.082765    0.545916    0.087509    11.00000    0.03258    0.04400 =
         0.01581   -0.00268    0.00464    0.00846
O2    3   -0.153139    0.585665    0.049498    11.00000    0.07142    0.07982 =
         0.01990   -0.00119    0.00306    0.04765
O3    3   -0.111565    0.500000    0.029006    10.50000    0.12590    0.03945 =
         0.04336    0.00000   -0.06029    0.00000
O4    3    0.000000    0.561663    0.029256    10.50000    0.03728    0.12333 =
         0.03363    0.04985    0.00000    0.00000
O5    3   -0.246601    0.558992    0.000000    10.50000    0.02871    0.11050 =
         0.04095    0.00000    0.00000    0.02736
O6    3   -0.102073    0.637756    0.000000    10.50000    0.11124    0.04120 =
         0.03690    0.00000    0.00000    0.02597
C1    1   -0.136000    0.575372    0.078547    11.00000    0.04652    0.05405 =
         0.01786   -0.00543    0.00779    0.01816
C2    1   -0.182438    0.600391    0.104742    11.00000    0.05517    0.06075 =
         0.02267   -0.00804    0.00819    0.02182
C3    1   -0.184221    0.583979    0.136108    11.00000    0.11126    0.10896 =
         0.02947    0.00078    0.01626    0.06650
AFIX  43
H3    2   -0.155484    0.556170    0.141438    11.00000   -1.20000
AFIX   0
C4    1   -0.227576    0.607636    0.160042    11.00000    0.11137    0.11892 =
         0.02984   -0.00617    0.01893    0.05759
AFIX  43
H4    2   -0.228818    0.595493    0.181564    11.00000   -1.20000
AFIX   0
C5    1   -0.268710    0.648147    0.153391    11.00000    0.05019    0.06748 =
         0.03141   -0.01904    0.01069    0.01585
C6    1   -0.263370    0.665360    0.122482    11.00000    0.12379    0.10377 =
         0.04993   -0.00630    0.02694    0.07295
AFIX  43
H6    2   -0.288085    0.694542    0.117706    11.00000   -1.20000
AFIX   0
C7    1   -0.222802    0.641369    0.097849    11.00000    0.12217    0.11380 =
         0.04055    0.00340    0.02581    0.07354
AFIX  43
H7    2   -0.222883    0.653216    0.076240    11.00000   -1.20000
AFIX   0
C8    1   -0.315454    0.673792    0.179163    11.00000    0.03875    0.07399 =
         0.04176   -0.02714    0.01046    0.00719
PART 1
C9    1   -0.361619    0.650187    0.202432    10.50000    0.08739    0.06902 =
         0.05303   -0.01646    0.04119    0.01903
AFIX  43
H9    2   -0.360778    0.617209    0.202809    10.50000   -1.20000
AFIX   0
C10   1   -0.409346    0.674294    0.225327    10.50000    0.05588    0.07952 =
         0.05878   -0.03007    0.02164    0.00256
AFIX  43
H10   2   -0.442566    0.657825    0.240598    10.50000   -1.20000
AFIX   0
PART 0
C11   1   -0.407831    0.723328    0.225596    11.00000    0.02382    0.08240 =
         0.03635   -0.03763    0.00284   -0.00309
PART 1
C12   1   -0.350693    0.744397    0.206285    10.50000    0.04487    0.06831 =
         0.09203   -0.04725    0.02477   -0.00895
AFIX  43
H12   2   -0.341434    0.776799    0.208666    10.50000   -1.20000
AFIX   0
C13   1   -0.305148    0.719889    0.183043    10.50000    0.05037    0.08537 =
         0.07930   -0.04732    0.03486   -0.01927
AFIX  43
H13   2   -0.266247    0.735936    0.169735    10.50000   -1.20000
AFIX   0
PART 0
C14   1   -0.458072    0.750000    0.250000    10.50000    0.02562    0.08137 =
         0.03962   -0.04002    0.00000    0.00000
PART 2
C9A   1   -0.302737    0.669985    0.211017    10.50000    0.03359    0.06510 =
         0.03612   -0.01612    0.00513    0.00452
AFIX  43
H9A   2   -0.260856    0.649230    0.218420    10.50000   -1.20000
AFIX   0
C10A  1   -0.347521    0.694780    0.233955    10.50000    0.03483    0.07247 =
         0.02739   -0.02293    0.00310    0.00610
AFIX  43
H10A  2   -0.334377    0.691101    0.256380    10.50000   -1.20000
AFIX   0
C12A  1   -0.427362    0.729641    0.192157    10.50000    0.03189    0.09854 =
         0.03652   -0.03283    0.00213    0.01825
AFIX  43
H12A  2   -0.470898    0.750087    0.185879    10.50000   -1.20000
AFIX   0
C13A  1   -0.381882    0.705461    0.168491    10.50000    0.04542    0.10040 =
         0.03002   -0.03202   -0.00255    0.02387
AFIX  43
H13A  2   -0.393718    0.709441    0.145979    10.50000   -1.20000
AFIX   0
HKLF 4

REM  exp_2043 in Fmmm
REM R1 =  0.0444 for    3699 Fo > 4sig(Fo)  and  0.0474 for all    4062 data
REM    211 parameters refined using      6 restraints

END

WGHT      0.0832    129.1912

REM Highest difference peak  1.002,  deepest hole -1.033,  1-sigma level  0.094
Q1    1  -0.1362  0.6709  0.0000  10.50000  0.05    1.00
Q2    1  -0.1178  0.6765  0.0000  10.50000  0.05    0.96
Q3    1  -0.2982  0.5751  0.0100  11.00000  0.05    0.88
Q4    1  -0.0986  0.5143  0.0139  11.00000  0.05    0.74
Q5    1   0.0000  0.5478  0.0458  10.50000  0.05    0.68
;
_shelx_res_checksum               942
_shelx_hkl_file
;
   0   0  -4 444589. 1130.11   2
   0   0  -6 44890.3 447.536   2
   0   0  -8 56518.0 572.850   2
   0   0   8 54793.1 496.897   1
   0   0 -10 318680. 1511.76   2
   0   0  10 305219. 1327.23   1
   0   0  12 419122. 1793.91   1
   0   0 -12 436356. 1960.10   2
   0   0 -14 344385. 1912.11   2
   0   0  14 343097. 1814.24   1
   0   0  16 263104. 1775.84   1
   0   0 -16 256221. 1797.88   2
   0   0 -18 545155. 2854.76   2
   0   0  18 573745. 2873.32   1
   0   0 -20 339934. 2415.92   2
   0   0  20 331186. 2267.96   1
   0   0 -24 142843. 1932.41   3
   0   0 -26 80182.0 1518.60   3
   0   0 -28 57234.0 1348.07   3
   0   0 -30 170624. 3066.54   7
   0   0 -30 173904. 2469.58   3
   0   0 -32 288985. 3326.34   3
   0   0 -32 286289. 4104.04   7
   0   0 -34 260328. 3260.87   3
   0   0 -34 266546. 4160.54   7
   0   0 -36 226639. 4001.86   7
   0   0 -38 198017. 3878.95   7
   0   0 -40 87985.7 2626.55   7
   0   0 -42 7235.47 832.630   7
   0   0 -44 48338.2 1913.23   7
   0  -2  -2 924302. 1091.94   1
   0  -2   8 14309.9 308.441   1
   0   2   8 10535.7 143.469   1
   0   2  10 9364.95 172.255   1
   0  -2  10 11301.9 309.508   1
   0   2  12 183853. 894.077   1
   0  -2  12 193128. 1381.64   1
   0  -2  14 286505. 1849.32   1
   0   2 -14 295223. 1848.76   2
   0  -2  16 99744.4 1208.31   1
   0   2 -16 100170. 1163.27   2
   0   2 -18 48637.2 872.496   2
   0  -2  18 47463.7 896.388   1
   0  -2  20 178539. 1915.48   1
   0   2 -20 172082. 1772.34   2
   0   2 -22 75683.8 1335.52   3
   0  -2  22 71305.1 1279.97   1
   0   2 -22 74471.9 1258.62   2
   0   2 -24 55962.9 1181.82   2
   0   2 -24 56268.1 1229.14   3
   0   2 -26 4540.70 376.821   2
   0   2 -26 4563.29 559.815   7
   0   2 -26 4960.94 403.117   3
   0   2 -28 17671.6 768.536   3
   0   2 -28 18269.6 1035.03   7
   0   2 -30 96687.7 1829.22   3
   0   2 -30 96581.3 2405.80   7
   0   2 -32 134904. 2287.80   3
   0   2 -32 136787. 2948.39   7
   0  -2 -32 127820. 2725.47   7
   0  -2 -34 206395. 3606.84   7
   0   2 -34 214676. 2996.00   3
   0   2 -34 212174. 3835.56   7
   0  -2 -36 189440. 3581.82   7
   0   2 -36 191545. 3806.44   7
   0   2 -38 92124.2 2016.54   3
   0   2 -38 90686.3 2698.68   7
   0  -2 -38 89994.2 2584.80   7
   0   2 -40 888.864 458.708   7
   0  -2 -40 1119.87 500.740   7
   0   2 -42 3826.09 598.085   7
   0  -2 -42 4740.56 695.176   7
   0  -2 -44 6982.57 807.013   7
   0  -4   0 61013.1 515.960   1
   0  -4  -2 2040.06 89.5795   1
   0  -4   2 1951.14 108.093   1
   0  -4   4 437520. 1655.67   1
   0  -4  -4 507986. 1094.63   1
   0  -4   6 148150. 1054.46   1
   0  -4   8 264067. 1481.55   1
   0  -4  10 43142.0 643.320   1
   0  -4  12 5068.90 262.661   1
   0  -4  14 2697.10 219.867   1
   0  -4  16 56068.7 962.162   1
   0   4 -18 10708.6 444.877   2
   0  -4  18 11303.2 479.999   1
   0  -4  20 60745.5 1202.15   1
   0   4 -20 59680.2 1100.61   2
   0  -4  22 6593.51 433.056   1
   0   4 -22 7622.58 637.317   7
   0   4 -22 7093.02 443.105   3
   0   4 -22 6476.26 391.545   2
   0   4 -24 46632.6 1107.92   2
   0   4 -24 46521.9 1530.87   7
   0   4 -24 46542.6 1131.79   3
   0   4 -26 43517.1 1568.88   7
   0   4 -26 42457.1 1118.86   3
   0   4 -26 43104.0 1152.19   2
   0   4 -28 6548.06 740.463   7
   0   4 -28 5578.44 450.009   3
   0   4 -30 665.785 461.579   7
   0   4 -30 537.740 187.085   3
   0   4 -32 34708.2 1171.99   3
   0   4 -32 34638.9 1608.74   7
   0  -4 -34 62252.6 2015.06   7
   0   4 -34 58812.2 1588.13   3
   0   4 -36 45898.8 1947.94   7
   0   4 -36 51670.3 1515.65   3
   0  -4 -36 48490.8 1835.79   7
   0   4 -38 31061.1 1200.70   3
   0  -4 -38 30512.6 1527.38   7
   0   4 -40 24844.4 1463.64   7
   0  -4 -40 27174.3 1468.94   7
   0   4 -40 29291.4 1169.16   3
   0  -4 -42 17054.8 1222.00   7
   0  -4 -44 6270.74 774.407   7
   0  -4 -46-368.275 440.690   7
   0  -6   0 76885.6 720.694   1
   0  -6  -2 95239.7 732.611   1
   0  -6   2 96312.3 835.355   1
   0  -6  -4 213554. 1044.43   1
   0  -6   4 206388. 1308.42   1
   0  -6   6 46184.8 662.190   1
   0  -6  -6 48648.6 423.900   1
   0  -6   8 266547. 1653.68   1
   0  -6  -8 223613. 755.107   1
   0  -6  10 97682.9 1066.92   1
   0  -6  12 108472. 1202.89   1
   0  -6  14 22161.9 580.579   1
   0  -6  16 11117.2 455.240   1
   0  -6  18 4076.90 318.662   1
   0   6 -20 199315. 2107.22   3
   0   6 -20 199718. 3066.73   7
   0  -6  20 194037. 2195.48   1
   0  -6  22 280176. 2821.37   1
   0   6 -22 283318. 2634.35   3
   0   6 -24 260047. 2648.87   3
   0   6 -24 262564. 2741.60   2
   0   6 -24 267634. 3852.86   7
   0  -6  24 257412. 2859.77   1
   0   6 -26 160267. 3136.52   7
   0   6 -26 159377. 2260.16   2
   0   6 -26 155289. 2176.07   3
   0   6 -28 97554.3 2555.68   7
   0   6 -28 93327.1 1749.68   3
   0   6 -30 15703.9 764.347   3
   0   6 -30 16493.4 1148.53   7
   0   6 -32 5752.22 747.477   7
   0   6 -32 5923.83 509.169   3
   0   6 -34 20641.1 1290.25   7
   0   6 -34 21257.7 959.447   3
   0   6 -36 92512.9 2817.60   7
   0   6 -36 100718. 2102.72   3
   0  -6 -36 93504.5 2539.60   7
   0   6 -38 95581.0 2117.22   3
   0  -6 -38 92538.2 2561.51   7
   0   6 -40 76188.9 1856.49   3
   0  -6 -40 75930.1 2371.10   7
   0   6 -42 91811.4 1999.34   3
   0  -6 -42 87932.6 2544.28   7
   0  -6 -44 72629.4 2282.28   7
   0  -6 -46 10818.5 921.633   7
   0  -8   0 307822. 1660.98   1
   0  -8   2 204681. 1428.57   1
   0  -8  -2 205733. 1324.42   1
   0  -8  -4 398935. 1745.70   1
   0  -8   4 397187. 2066.29   1
   0  -8  -6 222761. 1172.55   1
   0  -8   6 218471. 1577.24   1
   0  -8   8 612143. 2797.42   1
   0  -8  -8 617600. 1783.04   1
   0  -8  10 321508. 2139.10   1
   0  -8  12 289469. 2097.87   1
   0  -8  14 119184. 1402.27   1
   0  -8  16 84088.6 1286.07   1
   0   8 -18 24027.9 720.574   3
   0  -8  18 22055.7 737.666   1
   0   8 -20 7860.31 711.857   7
   0  -8  20 9088.26 505.833   1
   0   8 -20 8263.86 446.415   3
   0   8 -22 569695. 5772.42   7
   0  -8  22 580212. 4204.71   1
   0   8 -24 387332. 3479.89   2
   0   8 -24 384070. 3278.74   3
   0   8 -24 387260. 4968.83   7
   0   8 -26 273040. 3107.87   2
   0   8 -26 280729. 4338.31   7
   0   8 -26 270275. 2894.99   3
   0  -8  26 275923. 3331.09   1
   0   8 -28 124244. 2031.41   3
   0   8 -28 128083. 3093.06   7
   0   8 -30 30063.2 1046.87   3
   0   8 -30 30787.6 1583.49   7
   0   8 -32 259.604 197.998   3
   0   8 -32-1065.75 637.212   7
   0   8 -34 71908.9 1733.28   3
   0  -8 -36 52494.2 1911.74   7
   0   8 -36 51421.5 1513.40   3
   0   8 -38 97527.3 2124.61   3
   0  -8 -38 97049.7 2603.63   7
   0  -8 -40 114917. 2915.71   7
   0   8 -40 114575. 2258.89   3
   0   8 -42 154644. 2579.87   3
   0  -8 -42 143743. 3242.00   7
   0  -8 -44 86964.6 2452.74   7
   0  -8 -46 56699.3 1912.82   7
   0 -10   0 102679. 1112.95   1
   0 -10   2 12730.7 413.178   1
   0 -10  -2 11847.4 359.597   1
   0 -10   4 173651. 1500.22   1
   0 -10  -4 126921. 1180.50   1
   0 -10   6 121935. 1302.41   1
   0 -10  -6 129382. 1072.36   1
   0 -10  -8 433450. 1849.25   1
   0 -10   8 414049. 2455.25   1
   0 -10  10 606448. 3097.77   1
   0 -10 -10 557748. 1867.56   1
   0 -10  12 365031. 2577.54   1
   0 -10  14 227595. 2147.99   1
   0  10 -16 21646.8 682.703   3
   0 -10  16 21496.6 698.045   1
   0 -10  18 7870.21 444.890   1
   0  10 -18 8642.29 457.780   3
   0 -10  20 119224. 1889.32   1
   0  10 -20 113849. 1680.38   3
   0  10 -22 128487. 1854.79   3
   0 -10  22 125553. 2082.20   1
   0  10 -24 341818. 3521.00   2
   0  10 -24 346265. 3179.10   3
   0 -10  24 348850. 3551.55   1
   0  10 -26 185328. 2682.94   2
   0  10 -26 189246. 2446.84   3
   0 -10  28 79123.2 2041.34   1
   0  10 -28 86576.5 1702.06   3
   0  10 -30 4863.16 451.835   3
   0  10 -32 85164.5 1818.72   3
   0  10 -34 46847.5 1405.95   3
   0  10 -36 12263.4 744.970   3
   0  10 -38 21559.1 1012.75   3
   0 -10 -38 21251.5 1279.98   7
   0 -10 -40 93262.5 2563.87   7
   0  10 -40 91293.9 1986.69   3
   0 -10 -42 78096.9 2360.17   7
   0  10 -42 77003.6 1790.61   3
   0 -10 -44 85755.2 2384.69   7
   0 -12   0 391955. 2438.56   1
   0 -12  -2 13129.8 433.365   1
   0 -12   2 12350.6 448.944   1
   0 -12   4 3929.03 265.091   1
   0 -12  -4 3414.44 221.276   1
   0 -12  -6 35808.2 660.812   1
   0 -12   6 35338.1 794.508   1
   0 -12   8 156034. 1707.46   1
   0 -12  -8 158665. 1333.42   1
   0 -12  10 217362. 2071.26   1
   0 -12  12 190542. 2042.50   1
   0 -12  14 2208.94 249.535   1
   0  12 -14 3019.97 288.696   3
   0  12 -16 132454. 1755.57   3
   0 -12  16 120536. 1785.20   1
   0  12 -18 10439.8 523.357   3
   0 -12  18 9190.47 531.117   1
   0  12 -20 1078.79 281.995   6
   0 -12  20 1027.53 194.727   1
   0  12 -20 1183.07 226.875   3
   0  12 -22 33215.6 992.901   3
   0 -12  22 34608.1 1112.22   1
   0  12 -24 30287.7 987.729   3
   0 -12  24 32594.1 1146.36   1
   0  12 -26 55954.2 1356.04   3
   0 -12  26 59897.0 1680.94   1
   0  12 -28 1925.45 319.128   3
   0 -12  28 1101.95 278.622   1
   0  12 -30 5832.38 489.182   3
   0  12 -32 856.584 253.455   3
   0  12 -34 1326.36 295.616   3
   0  12 -36 1348.42 293.434   3
   0 -12 -38 2746.02 558.500   7
   0  12 -38 2148.34 359.591   3
   0  12 -40 1049.89 273.850   3
   0 -12 -40 1334.09 476.266   7
   0 -12 -42 26851.1 1378.42   7
   0  12 -42 25860.5 1012.85   3
   0 -14   0 447866. 2940.17   1
   0 -14  -2 454994. 2759.25   1
   0 -14   2 421095. 2886.57   1
   0 -14  -4 170299. 1648.65   1
   0 -14   4 166727. 1843.01   1
   0 -14  -6 56715.6 935.458   1
   0 -14   6 57262.4 1113.79   1
   0 -14  -8 4683.98 265.700   1
   0 -14   8 4926.40 338.761   1
   0 -14  10 113.508 127.389   1
   0 -14  12 29509.2 870.071   1
   0  14 -12 29418.7 842.720   3
   0 -14  14 178157. 2227.15   1
   0  14 -14 176633. 2089.81   3
   0  14 -16 130840. 1841.82   3
   0 -14  16 129496. 1985.22   1
   0 -14  18 105053. 1896.97   1
   0  14 -18 107413. 1711.92   3
   0  14 -20 61036.0 1339.90   3
   0  14 -20 60732.1 1486.61   6
   0  14 -22 27461.6 929.933   3
   0  14 -22 27418.7 1046.16   6
   0  14 -24 284.985 222.070   6
   0  14 -24 137.020 161.080   3
   0 -14  24 299.988 187.025   1
   0 -14  26 35416.6 1375.62   1
   0  14 -26 36705.8 1120.98   3
   0  14 -28 13982.5 717.491   3
   0 -14  28 10767.4 818.073   1
   0  14 -30 89842.4 1834.39   3
   0  14 -32 85588.7 1855.82   3
   0  14 -34 93366.8 1953.66   3
   0  14 -36 75593.4 1772.28   3
   0 -14 -38 31287.5 1471.64   7
   0  14 -38 28040.7 1061.16   3
   0 -14 -40 14956.4 1039.57   7
   0  14 -40 12508.6 712.342   3
   0  14 -42 1591.80 255.591   3
   0 -14 -42 1958.24 444.115   7
   0 -16   0 205639. 2110.33   1
   0 -16   2 348200. 2775.82   1
   0 -16  -2 333312. 2639.83   1
   0 -16   4 309455. 2813.70   1
   0 -16  -4 327384. 2573.11   1
   0 -16  -6 54057.1 1046.46   1
   0 -16   6 52921.9 1177.72   1
   0 -16   8 40059.6 1051.04   1
   0  16 -10 34720.1 981.707   3
   0 -16  10 40319.2 1090.05   1
   0  16 -12 149367. 2040.96   3
   0 -16  12 162153. 2204.41   1
   0 -16  14 129509. 2070.83   1
   0  16 -14 131724. 1936.83   3
   0 -16  16 248388. 2891.59   1
   0  16 -16 232707. 2604.52   3
   0  16 -18 108210. 1808.05   3
   0 -16  18 117518. 2044.31   1
   0  16 -20 79614.7 1743.87   6
   0 -16  20 74991.0 1721.79   1
   0  16 -20 75367.4 1533.38   3
   0  16 -22 20052.9 909.247   6
   0 -16  22 18566.7 916.426   1
   0  16 -22 18271.8 780.939   3
   0  16 -24 46968.7 1271.29   3
   0  16 -24 51019.3 1483.35   6
   0 -16  24 48773.9 1587.76   1
   0 -16  26 11980.7 839.002   1
   0  16 -26 11914.4 657.909   3
   0  16 -28 82090.8 1744.28   3
   0  16 -30 116612. 2142.75   3
   0  16 -32 159391. 2539.24   3
   0  16 -34 191280. 2765.55   3
   0 -16 -36 115082. 2689.87   7
   0  16 -36 104034. 2027.04   3
   0 -16 -38 39002.6 1572.15   7
   0  16 -38 38220.0 1189.68   3
   0  16 -40 11917.0 650.896   3
   0 -16 -40 10928.9 851.395   7
   0 -18   0 232085. 2496.44   1
   0 -18  -2 91217.9 1543.40   1
   0 -18   2 88302.4 1572.52   1
   0 -18   4 80180.4 1517.20   1
   0 -18  -4 80978.9 1439.27   1
   0 -18   6 53718.5 1255.27   1
   0 -18   8 7062.19 486.133   1
   0 -18  10 46235.3 1235.11   1
   0  18 -12 28852.4 949.773   3
   0 -18  12 31890.0 1053.11   1
   0 -18  14 70694.6 1592.54   1
   0  18 -14 69405.6 1468.10   3
   0  18 -16 83788.8 1642.15   3
   0 -18  16 85100.8 1805.92   1
   0 -18  18 103521. 2081.92   1
   0  18 -18 102778. 1962.41   6
   0  18 -18 101076. 1827.49   3
   0  18 -20 5589.77 522.925   6
   0 -18  20 5276.50 504.239   1
   0  18 -20 5439.11 455.717   3
   0 -18  22 16588.8 934.942   1
   0  18 -22 16439.2 853.422   6
   0  18 -22 15588.3 748.906   3
   0  18 -24-112.002 217.304   3
   0  18 -24 125.304 208.278   6
   0  18 -26 7412.78 574.325   6
   0  18 -26 8009.57 566.853   3
   0  18 -28 9432.53 632.526   3
   0  18 -30 41851.2 1311.53   3
   0  18 -32 144507. 2396.52   3
   0  18 -34 112149. 2092.39   3
   0 -18 -36 52110.6 1737.90   7
   0  18 -36 56005.7 1434.99   3
   0  18 -38 11282.5 633.985   3
   0 -20   0 107179. 1887.02   1
   0 -20  -2 62712.1 1466.89   1
   0 -20   2 64253.9 1500.40   1
   0 -20   4 322.352 211.611   1
   0 -20   6 7949.07 557.108   1
   0 -20   8 2692.72 376.012   1
   0 -20  10 2754.05 370.569   1
   0 -20  12 8765.20 626.019   1
   0 -20  14 1969.99 330.646   1
   0  20 -16 2051.21 296.257   3
   0 -20  16 2924.06 389.248   1
   0  20 -16 2152.86 365.776   6
   0  20 -18 10855.9 702.467   6
   0  20 -18 10364.4 629.483   3
   0 -20  18 11638.0 772.750   1
   0 -20  20 49985.7 1632.08   1
   0  20 -20 50271.9 1465.61   6
   0  20 -20 48883.6 1356.27   3
   0  20 -22 15617.3 847.967   6
   0  20 -22 15057.3 769.597   3
   0  20 -24 7041.11 544.467   3
   0  20 -24 7435.74 606.254   6
   0  20 -26 16813.8 874.611   6
   0  20 -26 15333.8 799.330   3
   0  20 -28 4897.48 477.816   3
   0  20 -30 11259.3 684.319   3
   0  20 -32 25744.0 997.248   3
   0  20 -34 28282.9 1026.45   3
   0  20 -36 9721.54 588.099   3
   0 -22   0 20079.2 955.710   1
   0 -22   2 2204.91 332.073   1
   0 -22   4 14981.2 802.494   1
   0 -22   6 63093.1 1673.51   1
   0 -22   8 83473.5 1960.28   1
   0 -22  10 28404.3 1179.45   1
   0 -22  12 18756.1 981.564   1
   0 -22  14 4061.42 483.129   1
   0  22 -14 4484.63 492.990   6
   0  22 -16 3559.90 439.925   6
   0  22 -18 96.0320 225.346   6
   0  22 -20 6601.68 543.858   3
   0  22 -20 8170.36 631.079   6
   0  22 -22 2557.47 369.072   3
   0  22 -22 3085.92 420.629   6
   0  22 -24 57228.6 1583.33   6
   0  22 -24 50610.6 1445.66   3
   0  22 -26 56713.3 1561.28   6
   0  22 -26 51136.2 1453.10   3
   0  22 -28 28049.8 1057.54   3
   0  22 -30 8140.68 584.656   3
   0  22 -32 13.7628 181.474   3
   0  22 -34 589.347 157.382   3
   0 -24   4 28689.3 1240.42   1
   0 -24   6 91557.0 2326.14   1
   0 -24   8 110817. 2531.38   1
   0  24 -10 109666. 2115.92   6
   0  24 -12 64591.9 1641.82   6
   0  24 -14 22422.3 998.588   6
   0  24 -16 1739.43 325.008   6
   0  24 -18 36545.4 1288.11   6
   0  24 -20 46827.7 1443.42   6
   0  24 -22 31543.7 1174.21   6
   0  24 -24 43154.6 1347.65   6
   0  24 -26 94715.5 1917.34   6
   0  24 -26 79899.4 1765.99   3
   0  24 -28 46838.0 1319.20   3
   0  24 -30 22895.1 880.604   3
   0  26   0 619.724 215.011   6
   0  26   2 2508.21 386.607   6
   0  26  -2 2895.17 406.683   6
   0  26  -4 31225.6 1194.33   6
   0  26   4 28238.5 1237.87   6
   0  26   6 72363.7 2026.71   6
   0  26  -6 76188.5 1841.51   6
   0  26  -8 103569. 2145.34   6
   0  26 -10 87319.3 1961.62   6
   0  26 -12 34599.8 1259.19   6
   0  26 -14 4426.43 465.515   6
   0  26 -16 10774.3 711.477   6
   0  26 -18 15007.7 823.362   6
   0  26 -20 18757.5 894.049   6
   0  26 -22 29997.2 1095.50   6
   0  26 -24 50568.8 1381.15   6
   0  26 -26 28143.7 987.397   6
   0  28   0 15692.9 909.047   6
   0  28   2 2121.63 377.446   6
   0  28  -2 2220.89 404.276   6
   0  28   4 76.6842 228.197   6
   0  28  -4 415.594 279.949   6
   0  28  -6 5548.36 552.870   6
   0  28   6 4766.82 568.059   6
   0  28  -8 15988.3 867.152   6
   0  28 -10 6454.00 574.848   6
   0  28 -12-119.344 239.682   6
   0  28 -14 106.609 241.087   6
   0  28 -16 967.368 262.961   6
   0  28 -18 911.349 245.467   6
   0  28 -20-279.232 208.084   6
   0  28 -22 9015.16 578.389   6
   0  28 -24 5806.12 445.630   6
   0  30   0 20631.3 985.289   6
   0  30  -2 18132.1 928.107   6
   0  30   2 19327.5 986.325   6
   0  30  -4 8157.44 615.686   6
   0  30   4 7941.43 654.821   6
   0  30  -6 2055.03 335.972   6
   0  30  -8 199.567 192.577   6
   0  30 -10 691.287 231.833   6
   0  30 -12 727.415 238.966   6
   0  30 -14 6158.21 509.165   6
   0  30 -16 20357.1 877.690   6
   0  30 -18 29666.8 1008.22   6
   0  30 -20 4312.33 391.658   6
   0  32   0 12949.5 737.834   6
   0  32  -2 18323.5 848.732   6
   0  32   2 13902.8 771.801   6
   0  32  -4 17740.3 829.309   6
   0  32  -6 4245.46 419.041   6
   0  32  -8 613.204 192.286   6
   0  32 -10-486.389 233.922   6
   0  32 -12 1577.12 252.983   6
   1  -1  -1 904845. 1642.76   1
   1  -1  -3 469960. 1343.26   2
   1  -1   3 479103. 1303.30   1
   1  -1  -5 25191.3 368.725   2
   1  -1   5 25030.5 334.151   1
   1  -1  -7 783.692 88.9768   2
   1   1   7 946.753 65.2133   1
   1  -1   7 793.468 81.9486   1
   1  -1  -9 5629.64 219.952   2
   1   1  -9 5748.66 230.738   2
   1  -1   9 5700.18 204.863   1
  -1   1  -9 5550.68 178.849   2
   1   1   9 5587.79 156.765   1
   1   1  11 103767. 743.377   1
  -1   1 -11 94709.4 825.176   2
   1  -1  11 99720.2 893.321   1
   1  -1 -11 101228. 992.269   2
  -1  -1 -11 96472.2 800.100   2
   1   1 -11 99685.1 1003.33   2
   1  -1  13 200212. 1395.77   1
   1   1 -13 204954. 1559.83   2
   1   1  13 202339. 1155.93   1
   1  -1 -13 204315. 1520.04   2
   1  -1  15 170532. 1418.54   1
   1   1  15 164834. 1137.61   1
   1   1 -15 167582. 1529.48   2
   1  -1 -15 166724. 1478.06   2
   1   1 -17 98041.8 1231.64   2
  -1   1  17 86189.2 1002.23   1
  -1  -1  17 88664.6 1113.76   1
   1  -1 -17 98326.9 1218.19   2
   1  -1  17 104324. 1226.00   1
   1   1  17 94177.0 950.020   1
  -1   1 -17 97555.9 1107.73   2
   1   1 -19 112486. 1421.98   2
   1  -1 -19 113583. 1416.14   2
  -1   1 -19 116587. 1316.57   2
   1  -1  19 117246. 1394.31   1
   1   1 -21 123285. 1593.82   2
  -1  -1  21 118232. 1578.53   1
   1   1 -23 66104.1 1269.89   2
   1  -1 -23 60669.7 1277.54   3
   1   1 -23 65249.2 1306.74   3
  -1  -1 -23 57664.8 1168.09   5
  -1   1 -23 63359.1 1233.58   3
   1  -1 -25 19091.2 761.859   3
  -1   1 -25 20161.0 751.879   3
   1   1 -25 19625.1 747.775   2
   1   1 -25 20555.2 783.845   3
  -1  -1 -25 18299.3 706.684   3
   1   1 -25 20339.8 1017.11   7
  -1  -1 -25 17802.6 672.490   5
   1   1 -27 6936.65 496.951   3
  -1  -1 -27 6047.44 430.382   5
  -1   1 -27 6619.44 463.868   3
  -1  -1 -27 6095.03 441.625   3
   1   1 -27 6432.59 660.284   7
   1  -1 -27 6112.68 468.878   3
   1   1 -29 48134.2 1324.87   3
   1  -1 -29 53274.6 1379.28   3
  -1   1 -29 54730.8 1327.35   3
   1  -1 -29 50882.9 1695.51   7
   1   1 -29 53275.9 1778.23   7
  -1  -1 -29 49412.4 1256.94   3
   1  -1 -31 112117. 2073.93   3
   1   1 -31 118939. 2144.49   3
   1   1 -31 118804. 2698.25   7
  -1   1 -31 113236. 2571.51   7
  -1   1 -31 115870. 2007.89   3
   1  -1 -31 115189. 2576.21   7
  -1   1 -33 196723. 3516.43   7
   1  -1 -33 184244. 3423.64   7
  -1  -1 -33 190506. 3419.20   7
  -1   1 -33 199435. 2758.60   3
   1   1 -33 193384. 3609.95   7
   1   1 -33 200859. 2888.48   3
  -1  -1 -35 196528. 3567.58   7
  -1   1 -35 199922. 2870.33   3
  -1   1 -35 198289. 3676.32   7
   1   1 -35 201429. 2932.02   3
   1   1 -35 197211. 3766.72   7
   1  -1 -35 190960. 3615.38   7
  -1  -1 -37 139765. 3103.52   7
   1   1 -37 139498. 3309.75   7
   1  -1 -37 133437. 3182.44   7
  -1   1 -37 139086. 3181.27   7
   1   1 -37 136836. 2466.59   3
  -1  -1 -39 24884.3 1419.01   7
  -1   1 -39 23223.1 1406.72   7
   1   1 -39 22297.9 1399.35   7
   1  -1 -39 22989.5 1445.21   7
  -1  -1 -41 1751.26 526.623   7
   1  -1 -41 2194.99 512.223   7
   1   1 -41 1545.21 446.375   7
  -1   1 -41 2228.07 526.231   7
   1  -1 -43 2882.39 572.902   7
  -1  -1 -43 3114.40 575.591   7
  -1   1 -43 2889.27 524.137   7
  -1  -1 -45 15720.3 1107.47   7
   1  -3  -1 196461. 882.445   1
   1  -3   1 199910. 949.791   1
   1  -3  -3 27919.2 328.213   1
   1  -3   3 26861.4 382.963   1
   1  -3   5 133357. 955.291   1
   1  -3   7 132255. 1052.85   1
   1  -3   9 10651.8 343.307   1
   1  -3  11 1060.28 136.849   1
   1  -3  13 26496.0 604.570   1
   1   3 -15 1073.64 159.795   2
  -1   3  15 874.999 80.2924   1
   1  -3  15 1043.74 150.608   1
  -1  -3  15 1322.82 152.346   1
   1  -3  17 38962.9 816.556   1
  -1  -3  17 37932.9 771.631   1
  -1   3 -17 38244.9 745.162   2
   1   3 -17 38251.5 807.880   2
   1   3 -19 1217.40 171.532   2
  -1   3 -19 1016.57 142.129   2
  -1  -3  19 877.795 156.747   1
  -1  -3  21 3174.92 291.200   1
   1   3 -21 3547.26 446.919   7
   1   3 -21 3139.03 293.609   3
   1   3 -21 2645.25 246.113   2
  -1   3 -21 3565.21 292.314   3
  -1   3 -21 3359.41 258.112   2
   1  -3  21 3539.10 311.121   1
   1   3 -23 770.224 169.049   3
  -1  -3 -23 495.011 176.575   5
  -1   3 -23 531.424 133.243   2
  -1   3 -23 770.961 185.202   3
  -1  -3  23 484.840 157.959   1
   1   3 -23 529.187 136.711   2
   1   3 -23 776.142 351.516   7
   1  -3  23 511.527 147.629   1
  -1  -3 -25 10493.5 543.387   5
   1   3 -25 9716.99 544.337   2
  -1   3 -25 10202.1 540.753   3
   1   3 -25 10696.9 806.530   7
   1   3 -25 10869.5 578.019   3
  -1   3 -27 4176.93 543.906   7
   1   3 -27 4137.43 389.074   2
   1   3 -27 4928.62 637.354   7
   1   3 -27 4273.86 388.434   3
  -1   3 -27 4328.00 382.392   3
   1   3 -29 315.760 219.795   3
  -1   3 -29 124.129 170.073   3
  -1   3 -29 469.696 402.684   7
   1   3 -29 844.150 433.089   7
   1   3 -29 182.099 131.608   2
   1   3 -31 40844.7 1289.72   3
   1  -3 -31 41354.4 1563.40   7
  -1   3 -31 41983.0 1227.43   3
  -1   3 -31 44520.7 1702.83   7
   1   3 -31 43175.7 1754.69   7
   1   3 -33 98446.3 2727.57   7
   1   3 -33 98914.8 2048.67   3
  -1   3 -33 103148. 2625.84   7
  -1   3 -33 97750.0 1945.41   3
   1  -3 -33 92371.5 2414.10   7
   1   3 -35 128494. 3143.72   7
   1  -3 -35 119958. 2853.43   7
  -1   3 -35 125423. 3007.74   7
  -1  -3 -35 122103. 2823.66   7
   1   3 -35 128568. 2390.65   3
  -1   3 -35 130330. 2324.97   3
   1  -3 -37 10513.1 970.812   7
  -1   3 -37 10795.7 708.604   3
   1   3 -37 8873.41 937.305   7
   1   3 -37 10574.4 712.047   3
  -1  -3 -37 10389.9 919.218   7
  -1   3 -37 9388.80 909.199   7
  -1  -3 -39 209.277 393.477   7
   1  -3 -39 249.308 403.141   7
   1   3 -39 262.899 195.804   3
  -1   3 -39-189.210 455.341   7
  -1   3 -39-44.3848 207.195   3
   1  -3 -41 5258.20 765.738   7
  -1   3 -41 5891.01 720.474   7
  -1  -3 -43 1750.32 518.023   7
   1  -3 -43 456.132 425.580   7
  -1  -3 -45 920.809 414.649   7
   1  -3 -45 191.397 433.297   7
  -1  -3 -47 11672.5 900.823   7
   1  -5   1 2158.24 131.810   1
   1  -5  -1 2398.13 130.504   1
   1  -5   3 36925.7 550.355   1
   1  -5  -3 38798.1 454.665   1
   1  -5  -5 235344. 1057.39   1
   1  -5   5 220641. 1427.77   1
  -1  -5  -7 2803.41 83.6597   1
   1  -5   7 4038.66 217.522   1
   1  -5   9 103857. 1085.92   1
   1  -5  11 7695.46 337.501   1
   1  -5  13 46614.3 849.470   1
   1  -5  15 14345.4 514.842   1
  -1  -5  15 13387.1 458.306   1
   1  -5  17 2401.37 232.293   1
  -1  -5  17 2076.46 210.341   1
   1   5 -19 310.413 141.373   2
  -1   5 -19 340.560 137.749   2
  -1  -5  19 183.361 105.405   1
   1  -5  19 279.117 134.495   1
  -1   5 -21 46317.0 1427.03   7
   1   5 -21 46779.2 1080.13   3
   1  -5  21 43693.0 1085.94   1
  -1  -5 -21 47401.7 1058.82   5
  -1   5 -21 46607.3 996.119   2
  -1  -5  21 43459.5 1035.18   1
  -1   5 -21 44525.8 1009.11   3
   1   5 -21 47778.8 1559.07   7
   1   5 -21 44476.6 1033.29   2
  -1   5 -23 118114. 1673.01   2
  -1   5 -23 116305. 1709.92   3
   1   5 -23 116969. 1796.40   2
  -1   5 -23 126148. 2430.23   7
  -1  -5 -23 123221. 1772.02   5
   1   5 -23 120360. 2535.80   7
   1   5 -23 120012. 1790.51   3
  -1  -5  23 114943. 1847.81   1
   1  -5  23 122685. 1958.84   1
   1   5 -25 85254.9 1578.39   3
  -1  -5  25 81075.8 1679.68   1
  -1   5 -25 84704.6 2119.64   7
  -1   5 -25 82494.4 1493.66   3
   1   5 -25 84512.7 1605.63   2
   1   5 -25 87572.5 2282.12   7
  -1   5 -27 87221.7 2236.79   7
   1   5 -27 85725.7 2362.92   7
   1   5 -27 85102.8 1737.51   2
   1   5 -27 82430.2 1648.33   3
  -1   5 -27 85487.6 1604.97   3
   1   5 -29 8584.87 582.635   3
  -1   5 -29 7717.14 532.067   3
  -1   5 -29 7686.15 812.889   7
   1   5 -29 6985.13 551.972   2
   1   5 -29 7840.09 823.340   7
   1   5 -31 1560.17 315.704   3
  -1   5 -31 2061.91 554.964   7
   1   5 -31 969.829 484.039   7
  -1   5 -31 1506.72 279.532   3
  -1   5 -33 37739.7 1204.81   3
   1   5 -33 37042.5 1263.23   3
   1   5 -33 36498.8 1702.22   7
  -1   5 -33 37941.8 1684.56   7
   1  -5 -33 34448.3 1513.51   7
  -1   5 -35-208.295 482.857   7
   1  -5 -35 596.556 445.687   7
  -1   5 -35 664.252 259.307   3
   1   5 -35 468.158 239.610   3
   1   5 -37 5058.72 509.286   3
  -1   5 -37 4221.84 660.230   7
  -1   5 -37 4997.95 512.429   3
  -1  -5 -37 4616.98 697.797   7
   1  -5 -37 4811.36 717.786   7
   1   5 -37 2892.54 509.887   7
  -1   5 -39 40303.6 1817.11   7
  -1   5 -39 45363.6 1449.98   3
  -1  -5 -39 44607.0 1804.59   7
   1   5 -39 44983.2 1459.48   3
   1  -5 -39 43376.8 1812.72   7
  -1  -5 -41 45193.6 1817.42   7
  -1   5 -41 44327.8 1393.04   3
   1  -5 -41 40890.3 1845.16   7
  -1  -5 -43 36124.2 1620.84   7
  -1   5 -43 31913.9 1156.25   3
   1  -5 -43 33312.6 1645.80   7
  -1  -5 -45 5782.38 706.274   7
   1  -5 -45 5492.50 685.356   7
  -1  -5 -47-1040.14 448.607   7
   1  -7   1 36413.2 575.142   1
   1  -7  -1 47482.3 618.132   1
   1  -7   3 67279.6 842.938   1
   1  -7  -3 68646.6 706.709   1
   1  -7   5 2051.02 177.654   1
  -1  -7  -5 2169.25 121.447   1
   1  -7   7 125475. 1211.83   1
  -1  -7  -7 128649. 735.309   1
   1  -7   9 262129. 1843.36   1
  -1  -7  -9 198900. 665.238   1
   1  -7  11 136546. 1458.32   1
  -1  -7  11 142702. 1360.81   1
  -1  -7  13 25996.5 637.005   1
   1  -7  13 27098.5 703.935   1
   1  -7  15 15441.2 550.540   1
  -1  -7  15 13727.8 507.341   1
   1  -7  17 6781.29 404.646   1
  -1  -7  17 6838.50 375.720   1
   1   7 -19 8679.55 459.161   3
   1   7 -19 8910.00 744.467   7
  -1  -7  19 8071.36 451.434   1
   1  -7  19 9184.61 482.973   1
  -1  -7 -19 8905.35 480.416   5
   1   7 -21 103800. 1677.84   2
  -1  -7 -21 111312. 1675.11   5
  -1   7 -21 102581. 1525.09   3
   1   7 -21 108239. 2523.43   7
   1   7 -21 104300. 1629.75   3
  -1  -7  21 104969. 1657.66   1
   1  -7  21 106716. 1708.32   1
  -1   7 -21 102153. 2262.05   7
  -1   7 -21 101207. 1561.42   2
  -1   7 -23 197758. 2302.02   2
  -1  -7  23 183595. 2431.98   1
   1   7 -23 198081. 3474.99   7
   1   7 -23 189661. 2371.36   2
  -1   7 -23 190088. 2179.97   3
   1  -7  23 203307. 2616.16   1
   1   7 -23 188189. 2282.31   3
  -1   7 -23 199929. 3282.52   7
   1   7 -25 237637. 2670.04   3
   1   7 -25 240174. 2826.71   2
  -1   7 -25 242844. 3799.47   7
  -1   7 -25 241955. 2572.45   3
  -1  -7  25 247764. 3056.45   1
   1  -7  25 244120. 3092.66   1
   1   7 -25 248199. 4081.87   7
   1   7 -27 104918. 2759.63   7
   1   7 -27 102384. 1828.34   3
   1   7 -27 100142. 1932.40   2
  -1   7 -27 101829. 2567.74   7
  -1   7 -27 101009. 1762.73   3
  -1   7 -29 45370.7 1247.92   3
  -1   7 -29 43156.0 1807.33   7
   1   7 -29 40229.6 1307.15   2
   1   7 -29 45024.4 1882.68   7
   1   7 -29 44091.6 1279.64   3
  -1   7 -31 633.679 413.150   7
  -1   7 -31 1455.29 283.204   3
   1   7 -31 1182.02 303.202   3
  -1   7 -33 3503.31 411.633   3
   1   7 -33 4047.83 462.772   3
  -1   7 -33 2789.98 553.111   7
   1   7 -33 2920.67 553.743   7
  -1   7 -35 2435.94 351.118   3
  -1   7 -35 1970.89 496.860   7
   1   7 -35 2551.78 378.712   3
   1  -7 -35 3297.34 651.698   7
  -1  -7 -37 38403.1 1687.37   7
   1   7 -37 40574.8 1366.99   3
  -1   7 -37 36536.9 1290.71   3
  -1   7 -37 35271.7 1729.75   7
   1  -7 -37 40474.6 1702.60   7
  -1  -7 -39 73195.8 2316.43   7
   1  -7 -39 70898.1 2343.84   7
   1   7 -39 75264.3 1859.34   3
  -1   7 -39 76123.5 1851.73   3
   1   7 -41 82489.9 1924.29   3
   1  -7 -41 81715.0 2514.60   7
  -1  -7 -41 83685.4 2455.88   7
  -1   7 -41 84460.2 1913.29   3
   1  -7 -43 67900.3 2240.88   7
  -1   7 -43 68725.6 1696.57   3
  -1  -7 -43 68005.0 2191.68   7
   1  -7 -45 38538.6 1724.69   7
  -1  -7 -45 41582.2 1695.60   7
  -1  -9   1 71405.7 867.694   1
   1  -9  -1 72298.2 858.571   1
   1  -9  -3 65331.1 800.696   1
  -1  -9   3 63991.2 850.283   1
   1  -9   3 64830.7 903.077   1
  -1  -9  -3 65658.3 768.633   1
  -1  -9  -5 69345.5 758.272   1
   1  -9   5 67851.7 972.301   1
   1  -9  -5 68698.6 802.089   1
  -1  -9   5 68548.3 918.907   1
   1  -9  -7 120468. 1033.20   1
   1  -9   7 117921. 1327.10   1
  -1  -9   7 119109. 1249.42   1
  -1  -9  -7 118359. 908.711   1
   1  -9  -9 265740. 1440.72   1
  -1  -9   9 261029. 1902.70   1
   1  -9   9 266271. 2051.71   1
   1  -9  11 230808. 2034.38   1
  -1  -9  11 235667. 1885.79   1
  -1  -9  13 208153. 1844.60   1
   1  -9  13 206733. 2014.64   1
   1  -9  15 24853.3 737.455   1
  -1  -9  15 24338.8 685.131   1
  -1  -9 -17 689.138 184.570   5
   1   9 -17 814.407 166.754   3
   1  -9  17 477.817 140.234   1
  -1  -9  17 600.450 153.917   1
   1  -9  19 358.519 151.181   1
   1   9 -19 264.412 156.815   3
  -1  -9  19 283.311 144.985   1
  -1   9 -19 125.932 284.186   7
  -1   9 -21 90425.7 1463.69   3
  -1  -9  21 89913.7 1658.98   1
   1   9 -21 93907.5 1576.84   3
  -1   9 -21 86640.3 2241.58   7
   1  -9  21 95213.6 1678.25   1
   1  -9  23 223086. 2814.05   1
  -1   9 -23 219127. 3713.75   7
  -1   9 -23 210336. 2338.66   3
   1   9 -23 212775. 2450.78   3
   1   9 -23 211328. 2687.97   2
  -1   9 -23 221523. 2599.57   2
  -1  -9  23 206551. 2596.02   1
   1   9 -25 216980. 2580.51   3
  -1   9 -25 208468. 2446.05   3
  -1   9 -25 219326. 3804.89   7
   1  -9  25 224767. 3073.28   1
   1   9 -25 213448. 2814.08   2
  -1  -9  25 222666. 2978.17   1
   1   9 -27 124914. 2276.41   2
  -1   9 -27 128063. 2027.83   3
   1  -9  27 125058. 2457.30   1
  -1   9 -27 129894. 3057.90   7
  -1  -9  27 125982. 2313.35   1
   1   9 -27 126993. 2068.24   3
  -1   9 -29 19314.3 841.093   3
  -1   9 -29 18777.7 1224.18   7
   1   9 -29 18771.0 854.589   3
  -1   9 -31 26562.7 1493.52   7
  -1   9 -31 28343.2 1029.99   3
   1   9 -31 29333.1 1096.72   3
  -1   9 -33 3532.66 406.767   3
   1   9 -33 3596.42 438.637   3
   1   9 -35 22434.2 1002.80   3
  -1   9 -35 21842.9 963.644   3
   1  -9 -35 19862.2 1232.73   7
   1  -9 -37 29174.2 1466.09   7
  -1   9 -37 27376.4 1110.57   3
   1   9 -37 29524.4 1165.74   3
   1  -9 -39 43037.8 1845.55   7
  -1   9 -39 45372.9 1424.04   3
  -1  -9 -39 46089.1 1835.75   7
   1   9 -39 43292.0 1413.86   3
   1   9 -41 80598.8 1881.64   3
  -1   9 -41 81742.7 1867.01   3
  -1  -9 -41 82638.6 2446.26   7
   1  -9 -41 79061.6 2444.43   7
  -1   9 -43 82031.0 1826.75   3
  -1  -9 -43 81873.8 2346.86   7
   1  -9 -43 76896.0 2385.34   7
   1  -9 -45 36365.2 1603.46   7
  -1  -9 -45 39020.3 1621.03   7
   1 -11   1 9569.36 372.730   1
   1 -11  -1 9487.94 360.112   1
  -1 -11  -1 9427.96 351.408   1
  -1 -11   1 8733.36 346.680   1
  -1 -11   3 14357.7 453.928   1
   1 -11  -3 13881.8 417.130   1
  -1 -11  -3 13312.3 402.598   1
   1 -11  -5 13177.4 422.008   1
  -1 -11  -5 12117.9 372.051   1
  -1 -11   5 11755.8 428.187   1
   1 -11   5 11840.6 449.408   1
   1 -11  -7 170312. 1409.40   1
  -1 -11   7 167437. 1586.46   1
  -1 -11  -7 169631. 1303.42   1
   1 -11   7 167515. 1717.64   1
   1 -11  -9 239202. 1595.08   1
  -1 -11   9 230359. 1915.01   1
  -1 -11  -9 230076. 1349.45   1
   1 -11   9 239161. 2109.80   1
  -1 -11  11 310773. 2359.96   1
   1 -11  11 304349. 2458.87   1
  -1 -11  13 77989.5 1257.37   1
   1 -11  13 78271.0 1309.40   1
  -1 -11  15 1492.60 212.148   1
   1 -11  15 1131.06 186.214   1
   1  11 -17 10566.7 572.044   6
   1 -11  17 10182.8 523.862   1
  -1 -11  17 9355.61 494.051   1
  -1 -11  19 1463.10 227.375   1
   1  11 -19 1591.95 243.482   3
  -1  11 -19 1947.19 236.191   3
   1 -11  19 1229.81 232.175   1
   1  11 -19 1642.77 290.373   6
  -1  11 -21 30110.1 888.645   3
   1  11 -21 30657.0 941.796   3
  -1 -11  21 29600.6 1008.61   1
   1  11 -21 27021.2 976.413   6
   1 -11  21 30130.9 1013.64   1
   1  11 -23 104813. 1776.10   3
   1 -11  23 109279. 2019.73   1
  -1 -11  23 106909. 2037.22   1
   1 -11  25 121641. 2314.97   1
   1  11 -25 118381. 1955.54   3
  -1  11 -25 118597. 1895.20   3
   1  11 -25 115663. 2209.49   2
  -1 -11  25 120849. 2344.81   1
  -1  11 -27 36389.9 1100.94   3
   1 -11  27 35809.8 1360.18   1
   1  11 -27 36364.7 1125.52   3
  -1 -11  27 35197.2 1294.89   1
   1  11 -27 33255.8 1243.57   2
  -1  11 -29 15728.8 757.477   3
   1  11 -29 15285.5 784.792   3
  -1  11 -31 64.7984 210.667   3
   1  11 -31 481.319 236.593   3
  -1  11 -33 7647.80 569.071   3
   1  11 -33 7395.11 578.723   3
  -1  11 -35 677.105 236.309   3
   1  11 -35 651.545 250.467   3
   1 -11 -35 789.648 407.653   7
   1  11 -37 1338.32 306.917   3
  -1  11 -37 1296.83 312.155   3
   1 -11 -37 1259.51 455.324   7
  -1 -11 -39 8982.39 863.765   7
   1  11 -39 9147.49 650.329   3
   1 -11 -39 10115.5 940.546   7
  -1  11 -39 8954.23 650.979   3
  -1  11 -41 29072.9 1100.95   3
   1 -11 -41 30418.5 1504.55   7
   1  11 -41 28785.0 1107.53   3
  -1 -11 -41 30408.0 1481.34   7
  -1  11 -43 39673.4 1243.84   3
  -1 -11 -43 41070.2 1642.40   7
   1 -11 -43 40159.8 1659.14   7
   1 -13   1 108791. 1370.12   1
  -1 -13  -1 112323. 1338.03   1
  -1 -13   1 107899. 1319.48   1
   1 -13  -1 111079. 1354.44   1
  -1 -13  -3 121481. 1355.90   1
   1 -13   3 118049. 1445.41   1
  -1 -13   3 118419. 1427.46   1
   1 -13   5 3639.72 287.942   1
  -1 -13  -5 3751.67 243.165   1
  -1 -13   5 3191.66 268.422   1
   1 -13  -5 3735.89 242.716   1
   1 -13  -7 212.299 80.8148   1
  -1 -13   7 291.043 132.526   1
  -1 -13  -7 418.129 104.892   1
   1 -13   7 418.619 146.098   1
  -1 -13   9 51270.6 1022.47   1
   1 -13  -9 49054.1 835.439   1
  -1 -13  11 22101.0 693.314   1
   1 -13  11 23045.2 729.364   1
   1 -13  13 10539.9 513.068   1
  -1 -13  13 9616.12 492.967   1
  -1 -13  15 51058.7 1156.11   1
  -1  13 -15 51502.6 1090.95   3
   1  13 -15 54900.3 1205.44   3
   1 -13  15 54437.9 1176.54   1
  -1 -13  17 116367. 1859.54   1
   1 -13  17 110383. 1790.85   1
  -1  13 -17 113712. 1653.41   3
   1  13 -17 119732. 1812.37   3
   1  13 -17 116821. 1927.96   6
   1  13 -19 20078.2 764.091   3
  -1 -13  19 17717.0 772.939   1
   1 -13  19 18609.7 777.608   1
  -1  13 -19 19256.8 718.779   3
   1  13 -19 20529.9 848.713   6
   1  13 -21 780.848 210.703   3
  -1  13 -21 1129.43 222.937   3
   1  13 -21 1281.13 288.663   6
  -1 -13  21 550.981 189.680   1
   1 -13  21 794.489 214.746   1
   1 -13  23 4742.11 474.720   1
  -1 -13  23 4246.31 446.938   1
  -1  13 -23 4169.13 379.873   3
   1  13 -23 4176.01 396.951   3
   1  13 -23 4080.15 422.973   6
   1 -13  25 4565.03 491.080   1
   1  13 -25 3945.90 397.864   3
  -1 -13  25 4340.10 477.624   1
  -1  13 -25 4346.12 390.255   3
  -1 -13  27 1361.59 315.418   1
  -1  13 -27 1299.05 275.477   3
   1 -13  27 1360.73 308.386   1
   1  13 -27 1778.54 341.677   2
   1  13 -27 1012.51 256.419   3
   1 -13  29 20608.5 1187.38   1
   1  13 -29 27648.2 1036.43   3
  -1 -13  29 21457.2 1137.37   1
  -1  13 -29 26095.0 967.351   3
  -1  13 -31 13067.0 709.115   3
   1  13 -31 12192.9 733.562   3
   1  13 -33 36057.3 1222.09   3
  -1  13 -33 35232.9 1180.56   3
   1 -13 -35 27746.1 1423.86   7
  -1  13 -35 29245.8 1111.27   3
   1  13 -35 29356.6 1136.79   3
   1 -13 -37 17646.5 1140.28   7
  -1  13 -37 17273.7 857.063   3
   1  13 -37 16592.5 841.205   3
  -1  13 -39 1685.49 310.169   3
  -1 -13 -39 2372.39 520.732   7
   1 -13 -39 2956.53 555.792   7
   1  13 -39 1862.09 314.412   3
  -1  13 -41 1101.80 243.150   3
  -1 -13 -41 1468.84 449.117   7
   1  13 -41 983.885 236.918   3
   1 -13 -41 1238.69 474.520   7
  -1  13 -43 5113.15 437.684   3
  -1 -13 -43 5099.89 625.298   7
  -1 -15   1 279677. 2403.57   1
   1 -15  -1 278073. 2373.09   1
   1 -15   1 280600. 2425.16   1
  -1 -15   3 178832. 1976.28   1
   1 -15   3 177204. 1973.28   1
   1 -15  -3 178864. 1890.52   1
  -1 -15  -3 176548. 1839.82   1
  -1 -15   5 137030. 1769.78   1
   1 -15  -5 137808. 1616.77   1
   1 -15   5 137022. 1764.37   1
  -1 -15  -7 3588.40 256.188   1
  -1 -15   7 3182.64 298.479   1
   1 -15   7 3433.33 311.992   1
   1 -15  -7 3577.59 271.241   1
  -1 -15   9 12325.8 568.640   1
   1 -15   9 13241.6 588.367   1
  -1 -15  11 21471.7 769.799   1
   1 -15  11 21178.1 754.872   1
   1  15 -11 19742.7 745.206   3
   1  15 -13 64571.8 1353.52   3
  -1 -15  13 62708.4 1345.30   1
   1 -15  13 64046.7 1345.89   1
  -1  15 -13 62296.1 1227.96   3
  -1 -15  15 130597. 2018.27   1
   1 -15  15 130533. 1983.16   1
  -1  15 -15 130401. 1818.22   3
   1  15 -17 124616. 2065.56   6
  -1 -15  17 123131. 1982.85   1
  -1  15 -17 123688. 1798.20   3
   1 -15  17 119053. 2014.84   1
   1  15 -17 127177. 1938.27   3
  -1  15 -19 71439.6 1420.95   3
   1  15 -19 73782.1 1646.84   6
  -1 -15  19 71886.1 1664.61   1
   1  15 -19 72489.2 1499.88   3
   1 -15  19 70171.7 1591.91   1
  -1  15 -21 26432.3 990.381   6
  -1 -15  21 24933.1 1043.12   1
   1  15 -21 26597.5 937.449   3
  -1  15 -21 25929.7 891.374   3
   1 -15  21 25489.1 1034.67   1
   1  15 -21 27861.5 1056.53   6
  -1  15 -23 11824.3 634.372   3
  -1  15 -23 11602.0 707.350   6
  -1 -15  23 12434.7 764.237   1
   1  15 -23 12146.6 658.866   3
   1  15 -23 12721.2 758.095   6
   1 -15  23 10767.8 707.403   1
   1 -15  25 1038.35 278.989   1
   1  15 -25 1314.52 288.403   6
   1  15 -25 857.354 210.001   3
  -1 -15  25 1265.35 359.706   1
  -1  15 -25 1200.89 253.175   3
   1 -15  27 33857.4 1464.70   1
  -1  15 -27 36330.3 1127.55   3
  -1 -15  27 31876.8 1361.62   1
   1  15 -27 38293.4 1215.36   3
  -1  15 -29 29415.9 1044.46   3
   1  15 -29 29327.9 1087.28   3
   1  15 -31 97316.6 1991.47   3
  -1  15 -31 95223.3 1896.07   3
  -1  15 -33 111083. 2093.37   3
   1  15 -33 110938. 2151.25   3
   1  15 -35 87309.9 1887.41   3
  -1  15 -35 84525.2 1849.10   3
  -1  15 -37 44050.3 1312.77   3
   1 -15 -37 45621.1 1767.77   7
   1  15 -37 42166.6 1295.40   3
  -1 -15 -39 15246.6 1038.01   7
  -1  15 -39 13720.0 727.560   3
   1 -15 -39 13456.8 966.688   7
   1  15 -39 13279.1 719.414   3
  -1 -15 -41 2761.55 504.511   7
  -1  15 -41 1854.65 281.072   3
   1 -17   1 144744. 1948.10   1
  -1 -17   1 148518. 1960.21   1
  -1 -17   3 125256. 1839.98   1
  -1 -17  -3 120304. 1624.63   1
   1 -17   3 125180. 1851.47   1
   1 -17  -3 126561. 1771.32   1
  -1 -17  -5 30012.6 799.725   1
   1 -17   5 31677.4 946.984   1
   1 -17  -5 31116.3 873.306   1
  -1 -17   5 30519.7 934.683   1
  -1 -17   7 28161.8 883.181   1
   1 -17   7 28606.3 917.856   1
  -1 -17   9 2679.60 288.892   1
   1 -17   9 3152.38 333.868   1
   1 -17  11 19442.0 802.368   1
  -1 -17  11 20300.8 827.605   1
  -1  17 -11 16894.4 680.346   3
   1  17 -11 17136.4 767.418   3
  -1  17 -13 56609.5 1247.90   3
   1  17 -13 58575.1 1382.39   3
  -1 -17  13 60902.1 1443.28   1
   1 -17  13 58736.9 1403.76   1
   1  17 -15 77713.7 1587.29   3
   1  17 -15 72238.3 1587.77   6
  -1  17 -15 74667.5 1462.90   3
  -1 -17  15 77399.4 1684.35   1
   1 -17  15 72229.3 1606.79   1
   1 -17  17 86825.4 1854.33   1
  -1 -17  17 86370.6 1841.63   1
  -1  17 -17 82983.2 1566.70   3
   1  17 -17 85593.2 1688.39   3
   1  17 -17 88725.2 1823.91   6
  -1 -17  19 50176.6 1494.22   1
  -1  17 -19 52137.8 1278.05   3
   1  17 -19 52220.8 1439.37   6
   1 -17  19 51323.1 1500.46   1
   1  17 -19 50757.5 1318.40   3
   1  17 -21 17518.7 869.299   6
   1 -17  21 15191.9 856.818   1
   1  17 -21 16011.2 762.558   3
  -1  17 -21 16659.4 746.075   3
  -1  17 -21 16585.5 833.276   6
  -1 -17  21 17452.7 887.522   1
  -1  17 -23 153.086 172.798   3
   1 -17  23 48.8858 175.080   1
   1  17 -23 570.010 257.473   6
   1  17 -23 343.515 197.203   3
  -1  17 -23 124.595 234.303   6
  -1 -17  23 352.221 216.571   1
   1  17 -25 9717.54 664.128   6
  -1  17 -25 9234.09 663.764   6
  -1 -17  25 8731.71 724.123   1
   1  17 -25 9731.04 625.252   3
  -1  17 -25 9145.70 581.600   3
   1 -17  25 9322.36 748.873   1
   1  17 -27 1283.02 294.939   3
  -1  17 -27 1070.72 229.011   3
  -1  17 -29 38120.2 1206.87   3
   1  17 -29 39257.4 1266.01   3
   1  17 -31 75836.3 1776.72   3
  -1  17 -31 73443.8 1701.18   3
   1  17 -33 109848. 2107.92   3
   1 -17 -33 113860. 2671.56   7
   1  17 -35 86817.6 1842.22   3
  -1  17 -35 88973.2 1848.89   3
  -1  17 -37 29642.3 1055.98   3
  -1 -17 -37 31869.7 1411.51   7
   1  17 -37 29885.5 1066.90   3
  -1  17 -39 5592.77 451.291   3
  -1 -17 -39 5044.56 578.254   7
   1 -19   1 92701.3 1737.10   1
   1 -19  -1 93401.0 1723.90   1
  -1 -19  -1 92545.5 1629.73   1
  -1 -19   1 88583.4 1609.12   1
   1 -19   3 32583.6 1028.07   1
  -1 -19  -3 33057.8 969.944   1
   1 -19  -3 32060.2 992.135   1
  -1 -19   3 33276.7 1013.12   1
  -1 -19   5 2415.49 311.994   1
   1 -19   5 3150.45 355.117   1
   1 -19   7 1456.12 273.150   1
  -1 -19   7 1059.77 227.807   1
   1 -19   9 250.066 172.124   1
  -1 -19   9-187.914 240.208   1
   1 -19  11 3552.52 391.336   1
  -1 -19  11 3223.23 377.136   1
   1  19 -13 8741.24 597.306   6
  -1  19 -13 8680.39 531.782   3
  -1 -19  13 7567.77 573.464   1
   1 -19  13 9629.30 632.941   1
  -1  19 -15 23145.7 870.211   3
  -1 -19  15 25398.0 1037.31   1
   1 -19  15 22482.5 993.350   1
   1  19 -15 25329.0 994.914   3
   1  19 -15 23337.9 961.070   6
  -1  19 -17 22584.2 873.124   3
   1  19 -17 24454.8 1002.24   6
  -1 -19  17 27154.1 1067.07   1
   1 -19  17 22942.6 1020.94   1
   1  19 -17 25529.8 999.683   3
  -1  19 -19 24289.6 911.610   3
   1  19 -19 25316.6 1039.96   6
   1 -19  19 22496.6 1063.04   1
  -1 -19  19 24430.5 1070.88   1
   1  19 -19 25117.4 996.247   3
  -1 -19  21 2182.51 364.212   1
  -1  19 -21 2112.80 360.550   6
   1  19 -21 1644.44 334.945   6
  -1  19 -21 2152.04 299.589   3
   1  19 -21 2252.86 345.357   3
   1 -19  21 2065.64 348.781   1
  -1  19 -23 382.624 236.997   6
   1  19 -23-15.6799 205.356   3
  -1  19 -23 142.252 173.272   3
   1  19 -23 60.4954 213.058   6
   1  19 -25 13483.5 796.522   6
   1  19 -25 11716.3 707.431   3
  -1  19 -25 12034.2 667.282   3
   1  19 -27 1413.44 281.899   3
  -1  19 -27 1095.47 227.565   3
   1  19 -27 1275.32 287.647   6
  -1  19 -29 1310.30 287.883   3
   1  19 -29 1133.06 263.910   3
  -1  19 -31 32131.4 1130.44   3
   1  19 -31 30915.9 1122.17   3
  -1  19 -33 59413.2 1511.21   3
   1  19 -33 59350.4 1524.43   3
   1  19 -35 33112.1 1118.97   3
  -1  19 -35 33791.6 1116.94   3
  -1  19 -37 9521.52 574.638   3
  -1  19 -39-175.911 187.523   3
   1 -21   1 35597.2 1184.41   1
   1 -21  -1 34371.6 1163.24   1
  -1 -21  -1 33630.1 1098.38   1
  -1 -21   1 36208.6 1145.40   1
   1 -21   3 988.255 250.751   1
  -1 -21   3 1369.84 271.344   1
  -1 -21   5 14557.6 762.393   1
   1 -21   5 14819.1 816.354   1
   1 -21   7 39325.0 1293.64   1
  -1 -21   7 40977.8 1283.39   1
  -1 -21   9 22298.1 975.197   1
   1 -21   9 20977.6 971.463   1
   1  21 -11 6461.92 561.263   6
  -1 -21  11 6285.87 544.244   1
   1 -21  11 5499.70 540.073   1
   1 -21  13 247.652 186.551   1
   1  21 -13 521.688 240.195   6
  -1 -21  13 323.180 205.379   1
   1 -21  15 151.782 174.279   1
   1  21 -15 322.124 275.078   6
  -1 -21  15 408.844 232.440   1
  -1 -21  17 7755.85 644.350   1
  -1  21 -17 6413.09 489.960   3
   1 -21  17 7181.90 640.531   1
   1  21 -17 6223.35 541.458   3
   1  21 -17 7235.13 585.490   6
   1  21 -19 1217.62 300.650   6
  -1  21 -19 838.534 224.024   3
  -1  21 -19 896.727 286.008   6
   1  21 -19 1200.37 286.070   3
   1  21 -21-1.96724 173.156   3
  -1  21 -21 83.0345 229.689   6
   1  21 -21 94.9298 210.863   6
  -1  21 -21 100.103 155.417   3
  -1  21 -23 12330.2 700.408   3
   1  21 -23 12535.0 761.936   6
   1  21 -23 11638.3 711.873   3
  -1  21 -23 13220.3 781.447   6
  -1  21 -25 34570.4 1252.51   6
  -1  21 -25 31099.9 1111.43   3
   1  21 -25 30164.8 1121.36   3
   1  21 -25 33395.4 1222.56   6
  -1  21 -27 19808.7 905.729   3
   1  21 -27 20901.4 936.633   3
   1  21 -29 4078.95 431.430   3
  -1  21 -29 4707.28 462.897   3
   1  21 -31 1247.90 275.592   3
  -1  21 -31 1720.19 287.154   3
  -1  21 -33 7273.21 511.110   3
   1  21 -33 7084.19 516.020   3
  -1  21 -35 8514.96 543.674   3
  -1 -23   3 2675.88 365.384   1
   1 -23   3 2180.53 345.946   1
   1  23   5 39041.9 1453.57   6
   1 -23   5 35181.4 1337.98   1
   1  23  -5 40039.5 1303.44   6
  -1 -23   5 35953.0 1319.00   1
   1 -23   7 62006.7 1810.56   1
   1  23  -7 69524.7 1691.42   6
   1  23   7 70593.3 2017.80   6
  -1 -23   7 64740.9 1803.09   1
  -1 -23   9 68937.8 1883.56   1
   1 -23   9 68458.8 1922.80   1
  -1 -23  11 28970.0 1256.45   1
   1  23 -11 33093.4 1208.65   6
   1 -23  11 29421.1 1290.97   1
   1  23 -13 13105.3 768.679   6
   1  23 -15 177.463 238.746   6
  -1  23 -17 6547.37 568.836   6
   1  23 -17 5959.69 541.935   6
   1  23 -19 4517.06 502.581   6
  -1  23 -19 4514.10 489.651   6
  -1  23 -21 11390.7 701.819   3
   1  23 -21 12384.7 749.431   6
  -1  23 -23 23436.7 978.862   3
   1  23 -23 23658.7 988.125   3
  -1  23 -25 44009.3 1351.55   6
  -1  23 -25 39392.4 1246.24   3
   1  23 -25 43244.5 1355.52   6
   1  23 -25 39103.4 1275.28   3
  -1  23 -27 52717.0 1440.64   3
   1  23 -27 50419.6 1434.58   3
   1  23 -27 52987.0 1455.16   6
   1  23 -29 20761.0 897.222   3
  -1  23 -29 21959.4 901.415   3
  -1  23 -31 3783.71 386.580   3
  -1  23 -33 22.5580 154.300   3
   1  25   1-70.8768 235.119   6
   1  25  -1 0.95963 234.762   6
   1  25   3 11914.1 830.096   6
   1  25  -3 11485.3 758.890   6
   1  25  -5 39865.2 1386.56   6
   1  25   5 39817.0 1526.91   6
   1  25  -7 90263.7 2017.10   6
   1  25   7 88082.6 2369.42   6
   1  25  -9 81329.6 1913.22   6
   1  25 -11 57328.5 1595.86   6
   1  25 -13 13337.3 800.265   6
  -1  25 -13 13956.5 798.147   6
   1  25 -15 7793.71 612.931   6
  -1  25 -15 7908.39 615.384   6
  -1  25 -17 4411.51 483.737   6
   1  25 -17 4295.21 474.123   6
   1  25 -19 12777.6 766.334   6
  -1  25 -19 13151.8 789.186   6
   1  25 -21 16926.5 854.886   6
  -1  25 -21 18569.3 914.977   6
  -1  25 -23 36196.9 1212.60   6
   1  25 -23 35268.6 1197.04   6
  -1  25 -25 48289.2 1367.10   6
   1  25 -25 49408.9 1385.81   6
   1  25 -27 36500.7 1136.32   6
   1  27  -1 1587.23 329.960   6
   1  27   1 1631.65 345.552   6
   1  27   3 226.501 258.980   6
   1  27  -3 409.321 246.982   6
   1  27   5 13051.8 924.800   6
   1  27  -5 13682.4 831.994   6
  -1  27   5 11075.6 794.815   6
  -1  27  -5 13684.5 790.311   6
   1  27  -7 29750.7 1198.40   6
  -1  27  -7 28705.0 1137.72   6
   1  27  -9 35344.8 1300.25   6
  -1  27  -9 36294.5 1260.88   6
  -1  27 -11 11019.1 737.416   6
   1  27 -11 10063.2 691.504   6
  -1  27 -13 2197.66 369.611   6
   1  27 -13 2261.04 360.340   6
  -1  27 -15-358.480 262.853   6
   1  27 -15-316.225 256.094   6
  -1  27 -17 60.2026 219.277   6
   1  27 -17-142.593 220.532   6
   1  27 -19 376.030 202.255   6
  -1  27 -19 259.299 221.702   6
  -1  27 -21 8326.87 588.886   6
   1  27 -21 8413.23 588.586   6
   1  27 -23 12512.1 689.077   6
  -1  27 -23 12051.0 679.339   6
  -1  27 -25 14669.5 701.104   6
   1  27 -25 16171.7 737.913   6
  -1  29  -1 13144.6 824.089   6
   1  29  -1 14232.3 848.129   6
   1  29   1 13385.2 863.122   6
  -1  29   1 12092.8 788.499   6
   1  29  -3 7800.29 638.655   6
  -1  29   3 6350.14 582.630   6
   1  29   3 7112.08 673.345   6
  -1  29  -3 7000.17 613.579   6
   1  29   5 822.773 278.513   6
  -1  29  -5 574.943 263.942   6
   1  29  -5 496.403 229.509   6
  -1  29   5 365.008 240.698   6
  -1  29  -7 738.540 272.379   6
   1  29  -7 1076.58 291.815   6
   1  29  -9 788.552 284.229   6
  -1  29  -9 881.862 273.008   6
   1  29 -11 334.417 223.397   6
  -1  29 -11 317.645 228.574   6
  -1  29 -13 2156.31 354.643   6
   1  29 -13 1691.71 300.372   6
  -1  29 -15 8195.34 596.141   6
   1  29 -15 6643.13 536.746   6
   1  29 -17 12075.5 682.933   6
  -1  29 -17 12384.1 713.777   6
   1  29 -19 4705.96 424.888   6
  -1  29 -19 5144.07 448.103   6
   1  29 -21 562.919 191.192   6
  -1  29 -21 577.801 211.679   6
  -1  31   1 14930.6 814.635   6
   1  31   1 14000.3 819.677   6
   1  31  -1 15342.4 838.025   6
  -1  31  -1 16338.3 851.126   6
  -1  31  -3 11495.1 716.310   6
   1  31   3 9271.67 685.630   6
   1  31  -3 10660.6 693.959   6
  -1  31   3 9261.10 661.111   6
  -1  31  -5 5091.60 505.239   6
   1  31  -5 4831.44 479.115   6
  -1  31  -7 765.927 251.118   6
   1  31  -7 742.098 229.984   6
  -1  31  -9 63.2047 191.412   6
   1  31  -9 47.5014 199.639   6
   1  31 -11-123.039 204.038   6
  -1  31 -11-29.7637 206.574   6
   1  31 -13 2035.89 290.889   6
  -1  31 -13 2453.26 328.657   6
   1  31 -15 15404.0 726.363   6
  -1  31 -15 15382.4 729.304   6
  -1  31 -17 21766.4 838.394   6
   1  31 -17 21222.3 837.015   6
   2   0   0 62919.9 442.511   2
   2   0   2 90303.0 381.712   2
   2   0  -2 87762.8 649.078   2
   2   0   4 177167. 1014.76   1
   2   0  -4 173990. 1037.87   2
   2   0  -6 239323. 1335.78   2
   2   0   6 242396. 1208.71   1
   2   0   8 71882.5 701.118   1
   2   0  -8 74379.3 816.752   2
   2   0 -10 2026.17 163.894   2
   2   0  10 1996.79 142.406   1
   2   0  12 671.462 105.663   1
  -2   0 -12 323.168 56.4276   2
   2   0 -12 546.566 112.105   2
   2   0  14 16117.3 414.549   1
   2   0 -14 15718.3 472.827   2
   2   0 -16 52886.8 923.080   2
   2   0  16 54078.0 809.932   1
   2   0  18 2920.83 212.064   1
   2   0 -18 3029.95 251.018   2
   2   0 -20 4295.29 309.285   2
  -2   0  20 3634.79 264.829   1
   2   0 -20 4792.05 495.192   7
   2   0 -22 1419.95 221.352   3
   2   0 -22 1821.95 228.329   2
   2   0 -22 1701.13 351.785   7
   2   0 -24 15730.8 706.519   3
  -2   0 -24 13906.1 600.921   3
   2   0 -24 16373.6 678.388   2
  -2   0 -24 13465.6 582.050   5
   2   0 -24 15619.9 892.550   7
   2   0 -26 15822.8 957.181   7
   2   0 -26 17660.3 776.281   3
  -2   0 -26 15550.9 661.811   3
  -2   0 -26 14649.8 612.830   5
   2   0 -28 2585.51 578.899   7
  -2   0 -28 2045.07 272.638   5
   2   0 -28 2278.81 339.137   3
  -2   0 -28 1886.17 277.763   3
   2   0 -30 12739.7 716.153   3
  -2   0 -30 12341.1 655.162   3
   2   0 -30 12717.4 979.665   7
   2   0 -32 46391.5 1769.64   7
   2   0 -32 48169.7 1425.29   3
  -2   0 -32 45101.0 1267.94   3
   2   0 -34 83212.7 1896.14   3
   2   0 -34 81355.8 2451.00   7
  -2   0 -34 86069.6 2334.74   7
  -2   0 -36 101403. 2584.92   7
   2   0 -36 98805.1 2749.07   7
  -2   0 -38 13093.4 1034.07   7
   2   0 -38 11511.7 1043.75   7
  -2   0 -40 9408.55 890.429   7
   2   0 -40 7443.93 863.254   7
  -2   0 -42 11080.2 964.562   7
  -2   0 -44 2013.26 478.188   7
  -2   0 -46 3809.65 567.932   7
   2  -2   0 106254. 803.400   1
   2  -2   2 37359.5 486.879   1
   2  -2   4 220.927 66.1187   1
   2  -2   6 32519.4 491.932   1
   2  -2  -6 32303.6 499.036   2
   2  -2   8 181602. 1250.32   1
   2  -2  -8 173777. 1261.22   2
   2  -2  10 6608.17 285.807   1
   2  -2 -10 6536.99 272.635   2
   2  -2 -12 10012.6 360.843   2
  -2   2 -12 10017.5 265.646   2
   2   2 -12 10312.7 382.579   2
   2  -2  12 10782.3 368.706   1
   2  -2  14 564.361 117.222   1
   2   2 -14 564.257 123.722   2
   2  -2 -14 449.964 114.491   2
  -2   2 -14 168.948 64.1978   2
  -2   2 -16 4257.64 213.605   2
   2  -2 -16 4067.86 267.902   2
   2   2 -16 3916.93 269.259   2
   2  -2  16 4313.41 273.572   1
  -2   2 -18 14671.0 434.132   2
   2  -2  18 14679.4 523.513   1
   2   2 -18 14140.5 526.856   2
  -2  -2  20 1074.33 172.159   1
   2  -2  20 1891.69 218.133   1
  -2   2 -20 1453.94 162.024   2
   2   2 -20 1740.03 371.727   7
   2   2 -20 1691.87 210.392   2
  -2  -2 -22 4303.43 332.650   5
  -2  -2  22 3912.48 319.409   1
   2   2 -22 4863.19 356.294   2
   2   2 -22 5309.46 399.160   3
   2   2 -22 4925.20 547.317   7
   2   2 -24 12962.1 851.044   7
   2   2 -24 12651.8 603.521   2
   2  -2 -24 11597.2 605.374   3
  -2  -2 -24 12425.5 557.597   5
  -2   2 -24 12215.2 575.812   3
   2   2 -24 13677.1 653.063   3
   2   2 -26 35872.4 1084.94   2
   2   2 -26 38350.3 1142.58   3
   2  -2 -26 33916.7 1056.92   3
  -2  -2 -26 36309.9 993.289   5
  -2   2 -26 37947.3 1036.19   3
   2  -2 -26 34581.8 1336.96   7
   2   2 -26 39483.4 1502.43   7
   2  -2 -28 9739.37 605.763   3
   2   2 -28 9704.20 611.059   2
  -2   2 -28 10726.3 590.852   3
  -2  -2 -28 9212.79 559.291   5
   2   2 -28 10056.7 871.270   7
   2  -2 -28 8433.46 758.089   7
   2   2 -28 10247.9 623.995   3
   2   2 -30 1521.85 533.750   7
   2   2 -30 1624.55 306.524   3
  -2   2 -30 1221.37 232.943   3
  -2   2 -30 1644.72 435.299   7
   2  -2 -30 1646.00 464.748   7
   2   2 -32 50250.7 1452.38   3
  -2   2 -32 50391.9 1347.49   3
   2  -2 -32 48127.2 1805.56   7
  -2   2 -32 50222.9 1756.00   7
   2   2 -32 50510.4 1946.08   7
   2  -2 -34 126275. 2948.84   7
  -2   2 -34 132783. 2259.04   3
  -2   2 -34 133661. 2932.22   7
   2   2 -34 131141. 3131.44   7
   2   2 -34 134676. 2428.62   3
   2  -2 -36 3791.85 650.071   7
   2   2 -36 3391.26 415.331   3
  -2   2 -36 3565.31 413.684   3
   2   2 -36 2330.97 600.376   7
  -2  -2 -36 3847.83 620.210   7
  -2   2 -36 3971.31 631.691   7
  -2   2 -38 333.803 435.182   7
  -2  -2 -38 279.658 372.245   7
   2  -2 -38 182.311 444.097   7
  -2   2 -38 34.5613 189.866   3
   2   2 -38-913.661 708.565   7
  -2   2 -40 12354.9 1028.82   7
  -2  -2 -40 13523.0 1062.56   7
   2  -2 -40 12870.4 1060.13   7
  -2   2 -42 8395.58 848.099   7
  -2  -2 -42 9598.45 932.162   7
   2  -2 -42 7302.75 850.931   7
  -2   2 -44 3427.90 534.556   7
  -2  -2 -44 4361.51 635.278   7
  -2  -2 -46 1468.57 390.327   7
   2  -4   0 418704. 1738.21   1
   2  -4  -2 617.994 87.8490   1
   2  -4   2 532.536 83.2381   1
   2  -4   4 118753. 990.057   1
   2  -4  -4 117296. 907.058   1
   2  -4   6 3802.89 197.408   1
   2  -4   8 3768.43 221.653   1
   2  -4  10 29485.6 612.498   1
   2  -4  12 12528.3 438.790   1
   2  -4  14 7147.52 348.304   1
   2  -4  16 527.302 140.249   1
   2   4 -16 644.261 148.677   2
  -2   4 -18 44909.6 816.733   2
   2   4 -18 41939.6 925.759   2
   2  -4  18 44566.0 981.458   1
  -2  -4  20 39987.3 925.347   1
  -2  -4 -20 42869.1 986.439   5
   2  -4  20 46532.8 1106.18   1
   2   4 -20 44897.5 1057.81   3
   2   4 -20 48983.3 1574.09   7
   2   4 -20 43789.9 1010.53   2
  -2   4 -20 43625.4 862.122   2
  -2  -4 -22 14761.1 621.995   5
   2  -4  22 16125.3 705.048   1
   2   4 -22 16988.5 990.766   7
  -2  -4  22 13682.9 592.689   1
   2   4 -22 15914.5 659.905   3
   2   4 -22 15737.1 648.658   2
   2   4 -24 45424.3 1180.64   3
  -2  -4 -24 44926.8 1080.02   5
   2   4 -24 44960.4 1619.26   7
   2   4 -24 42132.2 1109.56   2
   2   4 -26 46707.0 1266.14   2
  -2   4 -26 47428.4 1581.68   7
   2   4 -26 49418.2 1291.33   3
  -2  -4 -26 48150.7 1160.35   5
  -2   4 -26 46426.7 1162.16   3
   2   4 -26 50618.9 1788.94   7
  -2   4 -28 25015.7 1227.06   7
  -2  -4 -28 23949.4 883.781   5
   2   4 -28 27340.7 1021.01   3
   2   4 -28 24223.9 971.150   2
   2   4 -28 25915.8 1378.43   7
  -2   4 -28 25091.7 896.137   3
   2   4 -30 326.620 203.178   3
  -2   4 -30 638.517 423.970   7
   2   4 -30-10.5624 154.134   2
  -2   4 -30 112.702 159.703   3
   2  -4 -30 315.862 361.647   7
   2   4 -30-113.586 497.617   7
  -2   4 -32 59303.1 1485.66   3
   2  -4 -32 57440.9 1897.54   7
  -2   4 -32 60971.5 1979.40   7
   2   4 -32 63268.5 1664.63   3
   2   4 -32 59559.3 2141.17   7
   2   4 -34 4251.62 634.616   7
   2   4 -34 4710.72 489.339   3
  -2   4 -34 5323.64 476.489   3
   2  -4 -34 5828.98 757.316   7
  -2   4 -34 5990.74 760.978   7
   2  -4 -36 4137.43 660.248   7
  -2   4 -36 3953.54 448.343   3
   2   4 -36 4070.76 464.825   3
  -2   4 -36 3715.24 652.803   7
   2   4 -36 2495.84 531.375   7
  -2   4 -38 231.636 221.589   3
  -2   4 -38-104.984 430.152   7
   2   4 -38 125.799 206.300   3
   2  -4 -38-174.931 442.953   7
  -2  -4 -38 466.392 415.898   7
  -2   4 -40 7444.77 584.961   3
   2  -4 -40 5896.12 755.401   7
  -2   4 -40 5120.85 662.664   7
  -2  -4 -40 8575.34 865.976   7
  -2   4 -42 16595.1 1157.35   7
   2  -4 -42 18964.8 1291.24   7
  -2  -4 -44 2831.57 549.588   7
   2  -4 -44 1653.86 427.485   7
  -2  -4 -46-114.914 358.665   7
   2  -6   0 997.206 112.394   1
   2  -6  -2 300155. 1589.41   1
   2  -6   2 303622. 1673.38   1
   2  -6  -4 5469.46 221.305   1
   2  -6   4 5589.81 256.051   1
   2  -6  -6 20826.4 421.297   1
   2  -6   6 20523.0 491.717   1
   2  -6   8 143533. 1349.04   1
   2  -6  10 137851. 1411.49   1
   2  -6  12 3556.53 261.192   1
   2  -6  14 28683.7 742.809   1
   2  -6  16 48704.4 1015.14   1
  -2  -6  18 78994.5 1265.84   1
   2   6 -18 77149.6 1328.08   3
  -2  -6 -18 82945.6 1320.24   5
   2   6 -18 83684.7 2200.60   7
   2  -6  18 76708.9 1359.00   1
   2  -6  20 13308.9 606.996   1
  -2  -6  20 13365.6 572.128   1
   2   6 -20 14893.0 627.694   2
  -2   6 -20 13657.6 788.293   7
  -2  -6 -20 14743.2 608.640   5
   2   6 -20 13948.1 601.022   3
  -2   6 -20 14477.9 542.068   2
  -2  -6  22 764.137 175.742   1
   2   6 -22 1105.81 228.277   2
   2   6 -22 716.807 160.513   3
  -2   6 -22 1333.54 371.127   7
   2  -6  22 937.015 209.478   1
   2   6 -22 1021.46 425.942   7
  -2  -6 -22 1117.06 246.696   5
   2   6 -24 57075.8 1351.89   2
  -2   6 -24 60407.9 1770.22   7
   2  -6  24 62833.6 1563.31   1
  -2  -6 -24 60029.4 1286.54   5
   2   6 -24 56160.8 1317.79   3
  -2  -6  24 52324.5 1292.94   1
   2   6 -24 59054.0 1977.73   7
  -2   6 -24 57512.8 1228.03   3
   2   6 -26 61974.4 1487.52   2
  -2   6 -26 65827.5 1915.23   7
   2   6 -26 64352.5 1497.28   3
  -2  -6  26 57197.7 1497.24   1
  -2   6 -26 60436.4 1338.92   3
   2   6 -26 67047.5 2165.50   7
  -2  -6 -26 64345.1 1392.71   5
  -2   6 -28 20515.5 812.990   3
   2   6 -28 20476.7 1252.16   7
   2   6 -28 18639.7 879.108   2
  -2   6 -28 21168.9 1183.79   7
   2   6 -28 18677.7 858.838   3
  -2   6 -30 11665.6 952.691   7
   2   6 -30 11234.8 698.012   3
  -2   6 -30 10781.5 644.399   3
   2  -6 -30 10627.4 846.371   7
   2   6 -30 10478.1 894.776   7
   2   6 -30 10492.7 705.180   2
   2  -6 -32 194.180 386.322   7
  -2   6 -32 627.851 467.825   7
   2   6 -32 572.789 278.562   3
  -2   6 -32 334.551 187.255   3
   2   6 -34 509.927 223.506   3
  -2   6 -34 505.388 408.679   7
  -2   6 -34 527.858 212.188   3
   2  -6 -34 866.676 465.662   7
   2  -6 -36 18068.2 1211.24   7
  -2   6 -36 19360.7 912.801   3
  -2   6 -36 17338.4 1196.19   7
   2   6 -36 19117.6 954.548   3
  -2   6 -38-187.742 509.159   7
  -2  -6 -38 1158.56 470.771   7
  -2   6 -38 643.467 251.540   3
   2   6 -38 17.1169 248.592   3
   2  -6 -38 663.734 458.496   7
  -2   6 -40 31803.6 1184.67   3
  -2  -6 -40 31893.6 1513.87   7
   2  -6 -40 28337.9 1548.45   7
  -2   6 -42 20986.3 946.516   3
  -2  -6 -42 22871.0 1311.28   7
   2  -6 -44 4477.99 642.029   7
  -2  -6 -44 5977.46 730.257   7
  -2  -6 -46-663.790 393.735   7
   2  -8   0 3014.09 204.289   1
   2  -8   2 1579.86 163.311   1
   2  -8  -2 1795.82 163.210   1
   2  -8  -4 31107.1 561.998   1
   2  -8   4 30639.4 632.142   1
   2  -8  -6 1068.65 121.073   1
   2  -8   6 1458.59 166.151   1
   2  -8   8 8571.96 370.567   1
  -2  -8 -10 34651.5 379.416   1
   2  -8  10 44089.7 861.610   1
   2  -8  12 18940.8 602.837   1
   2  -8  14 5340.46 353.588   1
   2  -8  16 250416. 2377.87   1
  -2  -8  16 271346. 2272.05   1
   2  -8  18 25015.3 822.225   1
   2   8 -18 24698.8 785.506   3
  -2  -8 -18 26307.1 783.903   5
  -2  -8  18 24446.1 740.907   1
   2  -8  20 239.581 143.957   1
  -2  -8  20 184.967 133.972   1
  -2  -8 -20 502.058 189.717   5
  -2   8 -20 513.224 283.409   7
   2   8 -20 199.013 137.075   3
  -2  -8 -22 3673.75 350.309   5
   2   8 -22 3142.21 356.775   2
   2   8 -22 2676.23 281.991   3
  -2  -8  22 3199.80 326.128   1
  -2   8 -22 3442.62 523.921   7
   2  -8  22 3026.72 356.807   1
   2   8 -24 25220.9 905.983   3
  -2  -8 -24 26755.0 920.081   5
  -2  -8  24 25858.2 961.576   1
  -2   8 -24 24030.1 808.824   3
   2   8 -24 26524.5 969.464   2
  -2   8 -24 26390.5 1286.15   7
   2   8 -26 57234.5 1432.59   3
  -2  -8  26 55944.0 1522.74   1
   2  -8  26 59100.3 1693.04   1
  -2   8 -26 55961.3 1293.48   3
  -2   8 -26 59306.9 1970.46   7
   2   8 -26 55352.3 1485.78   2
   2   8 -28 2661.24 370.036   3
  -2   8 -28 2437.31 332.030   3
   2   8 -28 2171.37 340.336   2
  -2   8 -28 2015.05 485.575   7
  -2   8 -30 4658.94 440.438   3
   2   8 -30 4251.86 477.898   2
  -2   8 -30 4588.82 657.177   7
   2   8 -30 5086.47 486.723   3
   2   8 -32 1551.22 330.826   3
  -2   8 -32 622.516 427.547   7
  -2   8 -32 974.464 246.335   3
   2  -8 -32 1436.41 498.521   7
   2   8 -34 16538.7 874.503   3
  -2   8 -34 16239.1 809.252   3
  -2   8 -34 14401.6 1088.17   7
   2  -8 -34 14372.7 1036.97   7
  -2   8 -36 5261.21 493.420   3
   2   8 -36 4862.55 522.144   3
   2  -8 -36 5342.81 765.046   7
   2   8 -38 5252.56 529.857   3
  -2   8 -38 5631.43 545.119   3
   2  -8 -38 6076.01 764.074   7
   2  -8 -40 15759.4 1190.08   7
  -2  -8 -40 16602.6 1142.38   7
  -2   8 -40 16766.8 876.693   3
  -2   8 -42 23640.4 996.522   3
   2  -8 -42 21200.8 1317.72   7
  -2  -8 -42 23719.8 1298.80   7
   2  -8 -44 9388.47 897.724   7
  -2  -8 -44 10714.3 926.845   7
  -2   8 -44 10334.9 644.249   3
   2 -10   0 1540.94 174.545   1
   2 -10  -2 18333.2 492.989   1
   2 -10   2 18212.4 521.234   1
   2 -10   4 5734.47 313.595   1
   2 -10  -4 5487.87 270.205   1
   2 -10   6 4791.93 291.882   1
   2 -10  -6 4816.67 252.932   1
  -2 -10  -6 5241.21 230.790   1
   2 -10  -8 40216.2 708.147   1
  -2 -10  -8 40955.7 578.844   1
  -2 -10 -10 40270.2 501.627   1
   2 -10  10 42721.2 901.312   1
   2 -10  12 28032.6 758.706   1
  -2 -10  12 29892.7 733.873   1
  -2 -10  14 38414.6 873.381   1
  -2 -10 -14 38191.0 904.067   5
  -2 -10  16 20716.4 694.531   1
   2  10 -16 21628.7 746.367   3
  -2 -10 -16 21626.4 716.262   5
   2 -10  16 21191.5 741.441   1
  -2 -10  18 60921.3 1250.66   1
   2  10 -18 61981.5 1292.49   3
   2  10 -18 58532.0 1352.86   6
  -2 -10 -18 61144.4 1238.17   5
   2 -10  18 61994.3 1330.93   1
  -2 -10  20 3830.58 355.233   1
   2  10 -20 3684.75 376.886   6
  -2 -10 -20 4308.65 367.355   5
   2  10 -20 4101.81 358.764   3
   2 -10  20 3901.70 364.016   1
   2 -10  22 11479.8 651.837   1
   2  10 -22 10867.6 598.199   3
  -2 -10  22 10146.6 603.569   1
   2  10 -22 9864.58 602.614   6
  -2 -10  24 45007.1 1337.36   1
   2 -10  24 47356.0 1481.06   1
  -2  10 -24 41358.7 1087.81   3
  -2  10 -24 41766.5 1695.57   7
   2  10 -24 46173.6 1236.16   3
   2  10 -24 44750.0 1339.37   2
  -2  10 -26 25833.2 1407.73   7
   2  10 -26 27361.3 1117.80   2
   2 -10  26 28048.6 1202.06   1
  -2 -10  26 26391.1 1124.95   1
  -2  10 -26 26243.0 911.723   3
   2  10 -26 29196.5 1033.54   3
  -2  10 -28 9609.70 584.360   3
  -2  10 -28 9366.88 866.773   7
  -2 -10  28 9244.90 723.989   1
   2  10 -28 9860.39 710.617   2
   2  10 -28 9391.26 623.355   3
  -2  10 -30 113.895 182.437   3
   2  10 -30 35.2718 160.624   2
   2  10 -30 175.344 190.860   3
  -2  10 -32 15644.0 779.750   3
   2  10 -32 15374.2 840.236   3
   2 -10 -32 14871.6 1034.29   7
   2 -10 -34 25614.4 1411.02   7
   2  10 -34 27210.9 1110.94   3
  -2  10 -34 25745.5 1013.76   3
   2  10 -36 2919.23 410.274   3
  -2  10 -36 2499.46 351.212   3
   2 -10 -36 2997.94 581.440   7
   2 -10 -38 5282.82 739.172   7
   2  10 -38 5380.24 529.034   3
  -2  10 -38 5680.74 528.765   3
  -2  10 -40 5809.39 516.023   3
   2 -10 -40 5662.53 746.451   7
  -2 -10 -40 5821.35 725.006   7
  -2  10 -42 16949.0 833.477   3
   2 -10 -42 15600.2 1128.18   7
  -2 -10 -42 17427.3 1132.12   7
  -2  10 -44 17800.9 815.953   3
   2 -10 -44 16097.2 1067.42   7
   2 -12   0 2037.48 201.038   1
  -2 -12   0 2562.33 207.373   1
   2 -12  -2 6959.94 341.412   1
  -2 -12  -2 7295.20 320.846   1
  -2 -12   2 6638.91 340.129   1
   2 -12   2 7010.14 370.565   1
  -2 -12   4 36076.2 784.127   1
   2 -12   4 37833.6 852.150   1
   2 -12  -4 37674.0 770.253   1
  -2 -12  -4 38886.7 713.267   1
   2 -12  -6 10255.4 405.105   1
   2 -12   6 10287.6 456.377   1
  -2 -12   6 10680.0 435.943   1
  -2 -12  -6 11105.1 372.063   1
   2 -12  -8 17053.9 525.680   1
   2 -12   8 15736.3 574.081   1
  -2 -12  -8 16778.9 435.505   1
  -2 -12   8 17343.5 574.198   1
  -2 -12  10 69799.3 1154.98   1
   2 -12  10 67472.0 1204.26   1
  -2 -12 -12 5007.76 358.981   5
   2  12 -12 4484.07 370.708   6
   2 -12  12 5360.63 370.982   1
  -2 -12  12 4766.62 343.106   1
   2  12 -14 1069.72 192.850   3
  -2 -12  14 938.084 181.559   1
  -2 -12 -14 908.416 199.435   5
   2  12 -14 1024.09 199.137   6
   2 -12  14 1192.79 222.601   1
   2  12 -16 29785.5 920.058   3
  -2 -12  16 27626.0 853.031   1
   2  12 -16 28617.8 964.246   6
   2 -12  16 27642.7 908.481   1
   2  12 -18 33970.9 1006.69   3
  -2 -12  18 32403.9 982.928   1
   2 -12  18 33038.9 1034.50   1
   2  12 -18 35107.1 1082.29   6
  -2 -12  20 8377.35 532.181   1
   2  12 -20 8637.94 533.032   3
   2 -12  20 7924.28 552.567   1
   2  12 -20 9649.56 604.053   6
   2  12 -22 20236.4 864.955   6
   2  12 -22 21170.1 850.104   3
  -2 -12  22 20949.5 887.257   1
   2 -12  22 20443.4 916.084   1
  -2  12 -22 19840.3 752.129   3
   2  12 -24 45874.7 1279.99   3
  -2  12 -24 42792.2 1143.19   3
   2  12 -24 42272.8 1289.69   6
   2 -12  24 46869.5 1507.74   1
  -2 -12  24 44191.2 1370.25   1
  -2  12 -26 17771.2 768.852   3
   2 -12  26 18449.7 1011.98   1
   2  12 -26 18739.4 865.888   3
  -2 -12  26 18619.3 979.859   1
   2  12 -26 18643.3 980.512   2
   2 -12  28 471.972 240.949   1
  -2  12 -28 1369.59 267.820   3
  -2 -12  28 936.383 255.420   1
   2  12 -28 765.194 273.138   2
   2  12 -28 1309.13 298.400   3
   2  12 -30 11330.1 691.412   3
  -2  12 -30 11541.9 664.571   3
   2  12 -32 39130.5 1302.04   3
  -2  12 -32 37845.9 1193.18   3
   2 -12 -32 36921.2 1564.22   7
   2  12 -34 7194.78 579.908   3
   2 -12 -34 6649.08 789.991   7
  -2  12 -34 6929.74 542.820   3
  -2  12 -36 8400.47 610.723   3
   2  12 -36 7879.09 612.759   3
   2 -12 -36 8407.23 842.605   7
  -2  12 -38 1050.78 268.469   3
   2 -12 -38 1002.96 449.323   7
   2  12 -38 1278.14 301.196   3
  -2 -12 -40 7795.48 797.049   7
   2 -12 -40 9218.35 877.347   7
  -2  12 -40 8802.89 608.790   3
   2 -12 -42 13633.8 1023.08   7
  -2  12 -42 16445.0 792.087   3
  -2 -12 -42 16652.8 1090.30   7
   2 -14   0 46840.4 999.611   1
  -2 -14   0 46982.6 921.002   1
   2 -14  -2 27546.8 734.796   1
  -2 -14   2 27212.7 705.791   1
  -2 -14  -2 28818.9 705.207   1
   2 -14   2 26825.0 763.189   1
  -2 -14   4 17176.9 587.638   1
   2 -14   4 18081.8 640.103   1
  -2 -14  -4 17802.1 532.223   1
   2 -14  -4 17952.8 594.352   1
  -2 -14   6 1373.45 199.283   1
   2 -14   6 1626.89 223.453   1
  -2 -14  -6 1650.59 178.006   1
   2 -14  -6 1430.85 195.155   1
   2 -14  -8 19762.6 605.317   1
  -2 -14   8 20048.9 658.429   1
   2 -14   8 20230.9 707.444   1
   2  14 -10 6362.09 460.767   3
  -2 -14  10 7139.43 426.626   1
   2 -14  10 7196.83 447.130   1
  -2 -14  12 2082.02 253.869   1
   2  14 -12 1899.77 291.528   6
   2  14 -12 1716.66 246.731   3
   2 -14  12 1877.54 267.566   1
   2 -14  14 4729.89 404.262   1
   2  14 -14 4068.34 356.664   3
   2  14 -14 4721.70 429.587   6
  -2 -14  14 4316.13 368.715   1
  -2 -14  16 45649.6 1171.45   1
   2  14 -16 48369.4 1284.77   6
   2 -14  16 47283.9 1241.65   1
   2  14 -16 48842.2 1237.09   3
   2  14 -18 88933.3 1691.42   3
   2  14 -18 88246.6 1780.54   6
  -2 -14  18 85844.7 1716.52   1
  -2 -14  20 207.107 179.202   1
   2  14 -20 222.484 189.948   3
  -2  14 -20 358.890 160.561   3
   2  14 -20 311.371 218.433   6
   2 -14  20 92.8483 146.067   1
   2  14 -22 7348.98 551.119   3
   2 -14  22 6202.92 553.761   1
  -2  14 -22 6679.31 467.399   3
  -2 -14  22 6932.59 556.988   1
   2  14 -22 6464.99 532.964   6
   2 -14  24 13981.5 893.941   1
   2  14 -24 12686.5 745.079   6
  -2  14 -24 12512.1 644.301   3
  -2 -14  24 12077.1 793.280   1
   2  14 -24 13233.8 724.205   3
   2  14 -26 8265.04 598.878   3
  -2  14 -26 8109.83 539.300   3
   2 -14  26 7476.02 675.521   1
   2  14 -26 7728.12 695.501   2
  -2 -14  26 7348.05 666.353   1
   2  14 -28 40.2386 216.705   3
  -2  14 -28-48.9520 195.833   3
   2 -14  28-93.0157 222.363   1
  -2 -14  28 153.971 186.927   1
   2  14 -28 201.024 212.670   2
   2  14 -30 21841.3 960.439   3
  -2  14 -30 20520.5 872.854   3
   2  14 -32 16420.7 845.650   3
  -2  14 -32 15860.6 785.225   3
   2 -14 -32 16190.3 1064.10   7
   2  14 -34 40621.3 1303.98   3
  -2  14 -34 42925.7 1291.14   3
   2 -14 -34 43051.6 1734.17   7
   2 -14 -36 14337.6 1028.75   7
  -2  14 -36 12785.9 727.458   3
   2  14 -36 12719.4 742.424   3
   2  14 -38 1147.33 250.757   3
  -2  14 -38 1427.32 297.367   3
   2 -14 -38 952.588 419.582   7
  -2  14 -40 7724.99 568.979   3
  -2 -14 -40 7612.54 747.378   7
  -2  14 -42 8743.75 556.286   3
  -2 -14 -42 8954.05 786.385   7
   2 -16   0 136885. 1869.93   1
  -2 -16   0 133790. 1740.87   1
   2 -16   2 35296.2 979.883   1
  -2 -16  -2 33119.6 855.600   1
  -2 -16   2 33875.4 877.073   1
   2 -16  -2 33599.9 916.075   1
   2 -16  -4 48.3048 125.315   1
  -2 -16   4 141.449 117.719   1
   2 -16   4 155.501 130.867   1
  -2 -16  -4 198.223 97.9727   1
  -2 -16  -6 827.980 154.444   1
   2 -16   6 961.930 203.464   1
   2 -16  -6 686.953 153.653   1
  -2 -16   6 664.974 171.658   1
  -2 -16   8 4049.91 346.311   1
   2 -16   8 4327.04 375.916   1
   2  16 -10 18619.9 777.579   6
   2 -16  10 19373.4 767.897   1
  -2 -16  10 18377.0 733.147   1
   2  16 -10 18256.4 848.455   3
  -2 -16  12 1044.45 220.184   1
   2  16 -12 1102.33 289.781   3
   2  16 -12 1200.32 298.794   6
   2 -16  12 912.821 224.461   1
   2  16 -14 2965.25 378.616   3
   2 -16  14 1373.38 263.450   1
  -2 -16  14 1857.33 290.559   1
  -2  16 -14 2462.28 261.400   3
   2  16 -14 2114.59 338.477   6
  -2  16 -16 26691.4 845.954   3
   2  16 -16 31167.2 1069.04   3
  -2 -16  16 28652.2 1029.41   1
   2 -16  16 28469.6 1012.07   1
   2  16 -16 29147.5 1043.25   6
   2  16 -18 26714.5 991.877   3
   2  16 -18 24535.3 979.273   6
   2 -16  18 23100.9 945.339   1
  -2 -16  18 25047.5 990.755   1
  -2  16 -18 22917.5 814.539   3
  -2  16 -20 16088.4 703.255   3
   2 -16  20 14688.9 835.812   1
   2  16 -20 17529.5 837.680   3
  -2 -16  20 15473.0 802.968   1
   2  16 -20 16981.6 848.868   6
   2  16 -22 3434.33 420.643   3
  -2  16 -22 4129.77 386.879   3
   2  16 -22 3760.33 435.895   6
  -2 -16  22 4007.81 460.402   1
   2 -16  22 4208.93 478.644   1
   2  16 -24 11259.8 691.712   3
   2  16 -24 11682.7 739.503   6
   2 -16  24 10472.7 775.251   1
  -2  16 -24 12206.8 760.801   6
  -2  16 -24 11806.7 645.765   3
  -2 -16  24 11038.2 803.405   1
   2  16 -26 12299.0 760.116   6
   2  16 -26 11105.2 863.675   2
  -2  16 -26 12005.3 677.182   3
   2  16 -26 12626.3 730.457   3
   2 -16  26 9490.60 773.330   1
  -2 -16  26 10830.3 812.798   1
   2  16 -28 210.696 218.713   3
  -2  16 -28 117.474 225.562   3
  -2  16 -30 1205.18 257.955   3
   2  16 -30 1275.35 292.679   3
   2  16 -32 37433.2 1248.78   3
  -2  16 -32 37950.6 1204.79   3
   2  16 -34 19006.3 902.326   3
  -2  16 -34 19868.0 884.483   3
  -2  16 -36 10560.2 662.918   3
   2  16 -36 10397.9 655.858   3
  -2  16 -38 2648.27 342.628   3
  -2  16 -40 1384.06 252.884   3
  -2 -16 -40 1652.06 411.719   7
   2 -18   0 42919.3 1147.29   1
  -2 -18   0 42411.4 1100.12   1
  -2 -18   2 38615.3 1064.30   1
   2 -18  -2 38000.7 1075.26   1
  -2 -18  -2 39861.2 1038.42   1
   2 -18   2 38764.0 1122.30   1
  -2 -18   4 1484.05 232.888   1
   2 -18  -4 1913.02 269.151   1
   2 -18   4 1826.75 297.284   1
  -2 -18  -4 1789.82 229.113   1
   2 -18   6 17742.3 782.498   1
  -2 -18   6 16883.5 745.503   1
  -2 -18   8 19773.1 824.689   1
   2  18  -8 19073.0 830.962   6
   2 -18   8 19708.5 827.533   1
  -2 -18  10 23626.3 925.987   1
   2  18 -10 23327.9 921.292   6
   2 -18  10 22800.4 915.722   1
  -2 -18  12 2181.35 320.433   1
   2 -18  12 1901.11 308.848   1
  -2  18 -12 2449.83 278.563   3
   2  18 -12 2871.90 371.346   6
  -2  18 -14 18268.3 729.830   3
   2  18 -14 20220.2 899.440   6
  -2 -18  14 19898.2 884.170   1
   2 -18  14 18178.7 850.056   1
   2  18 -14 17913.5 879.440   3
  -2 -18  16 5019.97 477.140   1
   2  18 -16 5048.91 493.793   6
  -2  18 -16 5204.04 413.199   3
   2  18 -16 5512.52 495.362   3
   2 -18  16 4861.72 476.645   1
   2  18 -18 12741.3 740.918   3
   2 -18  18 12668.0 793.146   1
  -2  18 -18 13422.1 659.085   3
  -2 -18  18 12909.9 789.568   1
   2  18 -18 13350.8 754.657   6
  -2 -18  20 3745.99 454.245   1
  -2  18 -20 4214.97 395.572   3
   2  18 -20 4354.66 454.457   6
   2  18 -20 4479.61 466.858   3
   2 -18  20 4152.07 505.710   1
  -2 -18  22 220.407 190.733   1
  -2  18 -22-0.80170 229.650   6
   2  18 -22 196.220 197.056   3
  -2  18 -22 23.7859 164.839   3
   2 -18  22-87.7041 226.152   1
   2  18 -22 103.420 256.265   6
  -2  18 -24 28615.5 1124.00   6
  -2  18 -24 27738.3 993.963   3
   2  18 -24 26764.6 1064.11   3
   2  18 -24 28198.4 1125.65   6
  -2  18 -26 14742.7 734.173   3
   2  18 -26 15396.4 843.280   6
   2  18 -26 16036.7 836.590   3
   2  18 -28 13072.7 745.132   3
  -2  18 -28 13705.8 721.529   3
   2  18 -30 6423.42 540.675   3
  -2  18 -30 6280.04 500.316   3
   2  18 -32 9251.29 632.718   3
  -2  18 -32 9339.86 622.498   3
  -2  18 -34 19107.8 865.142   3
   2  18 -34 20057.3 898.438   3
  -2  18 -36 12767.3 691.473   3
  -2  18 -38-93.0834 160.761   3
  -2 -18 -38-270.096 269.805   7
   2 -20   0 22380.4 919.093   1
  -2 -20   0 23174.4 860.598   1
   2  20   2 17565.0 888.406   6
   2 -20   2 18447.4 861.579   1
  -2 -20   2 18749.9 839.693   1
   2 -20  -2 18889.5 852.583   1
  -2 -20  -2 17248.9 734.820   1
   2  20   4 795.321 265.432   6
  -2 -20   4 143.886 159.690   1
   2  20  -4 638.838 268.138   6
   2 -20   4 400.691 185.434   1
   2  20   6 15047.5 892.897   6
   2  20  -6 15154.5 786.523   6
   2 -20   6 15442.4 801.215   1
  -2 -20   6 14192.5 752.912   1
   2  20  -8 36813.3 1203.31   6
   2 -20   8 39773.7 1352.71   1
  -2 -20   8 36992.3 1226.08   1
   2 -20  10 13119.2 797.547   1
   2  20 -10 13418.6 751.927   6
  -2 -20  10 12314.6 732.201   1
   2  20 -12 880.183 294.276   6
   2 -20  12 736.542 265.813   1
  -2 -20  12 440.848 238.175   1
   2 -20  14 687.895 237.750   1
  -2  20 -14 889.765 223.611   3
   2  20 -14 863.598 285.893   6
  -2 -20  14 733.130 188.783   1
   2  20 -16 39868.5 1294.66   6
   2  20 -16 36676.3 1290.80   3
   2 -20  16 35565.6 1333.50   1
  -2  20 -16 36942.5 1108.84   3
  -2 -20  16 37842.2 1387.06   1
   2 -20  18 1890.70 329.946   1
   2  20 -18 2550.80 377.126   3
   2  20 -18 2889.96 416.635   6
  -2  20 -18 2182.08 302.585   3
  -2 -20  18 2377.47 395.249   1
   2  20 -20 321.103 239.554   6
  -2  20 -20 399.396 185.341   3
   2  20 -20-76.3029 248.198   3
   2  20 -22-20.8181 243.360   6
  -2  20 -22 284.080 237.759   6
  -2  20 -22 70.3766 154.429   3
   2  20 -22-50.3268 240.974   3
  -2  20 -24 4256.33 415.982   3
  -2  20 -24 4770.38 481.364   6
   2  20 -24 4665.23 479.542   6
   2  20 -24 4140.52 433.952   3
  -2  20 -26 42178.7 1247.37   3
   2  20 -26 45244.3 1423.40   6
   2  20 -26 41959.7 1324.27   3
  -2  20 -28 2879.20 355.268   3
   2  20 -28 2631.01 367.721   6
   2  20 -28 2575.82 357.526   3
   2  20 -30 649.125 202.530   3
  -2  20 -30 1038.57 261.178   3
   2  20 -32 5714.82 482.133   3
  -2  20 -32 6163.96 490.098   3
  -2  20 -34 20452.4 859.894   3
  -2  20 -36 4625.23 411.305   3
   2 -22   0 15357.3 860.451   1
   2  22   0 15871.9 894.304   6
   2  22   2 6750.18 608.217   6
   2  22  -2 7396.63 627.615   6
  -2 -22   2 7357.80 551.640   1
   2 -22   2 6646.47 574.055   1
   2 -22   4 301.117 170.807   1
   2  22   4 928.994 338.946   6
   2  22  -4 1428.20 330.554   6
  -2 -22   4 902.749 264.321   1
   2 -22   6 14677.4 854.816   1
   2  22   6 17635.3 1033.94   6
   2  22  -6 16648.3 885.003   6
  -2 -22   6 15139.4 828.337   1
   2  22  -8 28657.0 1138.74   6
   2 -22   8 25561.2 1139.62   1
  -2 -22   8 28101.1 1132.11   1
   2 -22  10 8795.14 677.072   1
  -2 -22  10 10744.8 729.592   1
   2  22 -10 10913.5 707.048   6
   2 -22  12 1728.57 331.517   1
   2  22 -12 2516.12 429.073   6
  -2 -22  12 2272.64 400.303   1
  -2 -22  14 12722.5 814.004   1
   2  22 -14 13182.4 768.347   6
   2 -22  14 11659.3 796.714   1
   2  22 -16 4934.49 498.539   6
  -2  22 -18 3482.32 364.098   3
   2  22 -18 4308.71 472.060   6
   2  22 -20 258.822 181.754   3
   2  22 -20 266.904 231.744   6
  -2  22 -20-197.528 198.195   3
  -2  22 -22 4632.88 489.980   6
  -2  22 -22 4445.11 422.679   3
   2  22 -22 5182.49 513.751   6
   2  22 -22 4349.44 451.400   3
  -2  22 -24 17745.3 895.041   6
   2  22 -24 16634.5 859.001   6
   2  22 -24 15082.8 812.268   3
  -2  22 -24 15082.6 768.085   3
  -2  22 -26 8896.61 635.700   6
   2  22 -26 8019.76 587.749   3
   2  22 -26 9765.01 662.667   6
  -2  22 -26 8978.71 605.450   3
   2  22 -28 14086.9 748.569   3
   2  22 -28 14978.9 792.441   6
  -2  22 -28 14673.6 764.926   3
  -2  22 -30 323.785 191.617   3
  -2  22 -32 5404.47 454.155   3
  -2  22 -34 7627.83 498.233   3
   2  24   0 10588.7 762.305   6
   2  24   2 2116.59 434.631   6
   2  24  -2 2356.37 422.833   6
  -2 -24   4 2084.40 360.426   1
   2  24  -4 3612.63 486.824   6
   2  24   4 3205.92 481.458   6
   2 -24   4 2848.85 436.953   1
  -2 -24   6 12132.5 829.007   1
   2  24  -6 16387.3 895.932   6
   2  24   6 17101.0 1062.75   6
   2 -24   6 13086.3 896.673   1
   2  24  -8 19937.8 988.419   6
   2  24 -10 20142.4 971.028   6
   2  24 -12 1175.44 314.437   6
   2  24 -14 86.1745 243.120   6
   2  24 -16-131.246 258.259   6
  -2  24 -18 4849.00 507.302   6
   2  24 -18 4266.31 488.897   6
   2  24 -20 2366.08 365.242   6
  -2  24 -20 2784.94 414.906   6
   2  24 -22 10153.9 670.388   6
  -2  24 -22 10651.7 699.893   6
   2  24 -24 19260.6 912.148   6
  -2  24 -24 19090.0 898.355   6
  -2  24 -26 16514.3 807.967   6
  -2  24 -26 15523.5 770.782   3
  -2  24 -28 7189.70 522.035   3
   2  24 -28 6970.38 515.229   6
  -2  24 -30 149.686 140.830   3
   2  26   0 11200.6 801.293   6
   2  26   2 3331.07 485.492   6
   2  26  -2 3723.52 500.583   6
   2  26  -4 729.865 302.203   6
   2  26   4 598.373 342.432   6
   2  26   6 7884.58 745.446   6
   2  26  -6 8565.30 678.329   6
   2  26  -8 20880.1 1010.11   6
   2  26 -10 3873.63 471.423   6
   2  26 -12 3111.16 412.940   6
  -2  26 -14 181.846 237.818   6
   2  26 -14-204.803 245.069   6
  -2  26 -16 6415.78 573.581   6
   2  26 -16 6414.23 558.050   6
  -2  26 -18 9353.47 666.422   6
   2  26 -18 8272.60 630.098   6
   2  26 -20-139.774 208.268   6
  -2  26 -20 189.831 221.593   6
   2  26 -22 3299.91 399.628   6
  -2  26 -22 2295.34 342.016   6
   2  26 -24 12180.2 693.662   6
  -2  26 -24 11158.6 653.859   6
   2  26 -26 9114.10 567.882   6
   2  28   0 6502.12 620.312   6
   2  28  -2 6984.83 621.439   6
   2  28   2 7423.89 674.015   6
   2  28  -4 2634.67 412.411   6
   2  28   4 2180.98 413.359   6
  -2  28   6 2695.70 432.553   6
   2  28  -6 3325.78 457.811   6
   2  28  -8 3568.57 444.417   6
  -2  28  -8 3305.01 437.530   6
  -2  28 -10 7279.74 577.502   6
   2  28 -10 7313.92 605.578   6
  -2  28 -12 907.478 281.223   6
   2  28 -12 1034.90 278.513   6
  -2  28 -14 3613.27 448.282   6
   2  28 -14 3642.74 430.458   6
  -2  28 -16 15434.3 806.560   6
   2  28 -16 13946.4 769.928   6
   2  28 -18 5652.55 488.045   6
  -2  28 -18 5754.63 505.306   6
  -2  28 -20 323.916 190.670   6
   2  28 -20 140.808 177.871   6
   2  28 -22 167.032 162.971   6
  -2  28 -22 238.472 183.057   6
   2  28 -24 2185.30 286.029   6
   2  30   0 7059.34 615.781   6
  -2  30   0 6696.26 560.185   6
   2  30   2 5462.70 558.845   6
  -2  30   2 4804.64 509.784   6
  -2  30  -2 5722.50 519.186   6
   2  30  -2 5545.60 532.080   6
  -2  30   4 773.385 263.386   6
   2  30  -4 698.788 226.975   6
  -2  30  -4 875.266 292.707   6
   2  30  -6-0.86737 201.424   6
  -2  30  -6 426.197 242.177   6
  -2  30   6-2.84430 193.510   6
  -2  30  -8 5002.98 482.435   6
   2  30  -8 4543.12 490.066   6
  -2  30 -10 5021.35 487.122   6
   2  30 -10 4433.61 455.133   6
  -2  30 -12-22.2774 184.251   6
   2  30 -12-211.496 225.341   6
   2  30 -14 3800.41 399.550   6
  -2  30 -14 4359.39 425.468   6
   2  30 -16 8221.41 557.509   6
  -2  30 -16 8662.57 574.871   6
   2  30 -18 7251.68 507.027   6
  -2  30 -18 7740.25 524.239   6
  -2  32   0 7008.40 531.527   6
   2  32   0 7014.14 565.686   6
  -2  32  -2 2866.76 366.848   6
  -2  32   2 2108.18 321.999   6
   2  32  -2 3026.02 373.362   6
   2  32  -4 485.715 229.134   6
  -2  32  -4 660.842 234.151   6
   2  32  -6 334.595 183.176   6
  -2  32  -6 431.915 198.050   6
   2  32  -8 2085.40 315.812   6
  -2  32  -8 2406.48 330.577   6
   2  32 -10 2781.94 333.012   6
  -2  32 -10 2428.71 330.405   6
   2  32 -12 199.462 173.382   6
  -2  32 -12-275.043 190.021   6
   3  -1  -1 6817.61 203.910   2
   3  -1  -3 46954.5 582.462   2
   3  -1   3 46443.0 636.801   1
   3  -1  -5 13050.1 334.235   2
   3  -1   5 12419.1 344.113   1
   3   1  -5 13173.0 347.334   2
   3   1  -7 210952. 1472.76   2
   3  -1  -7 212852. 1439.77   2
   3   1  -9 232290. 1652.50   2
   3  -1  -9 234561. 1627.44   2
   3  -1 -11 46206.5 783.576   2
   3   1 -11 45774.9 798.320   2
   3  -1  13 35719.0 675.611   1
   3   1  13 35567.7 617.139   1
   3  -1 -13 38057.8 757.146   2
   3   1 -13 37075.1 760.690   2
   3   1  15 657.452 102.951   1
   3   1 -15 652.417 139.565   2
   3  -1 -15 782.384 143.361   2
   3  -1  15 908.340 134.315   1
   3   1 -17 524.712 138.818   2
   3  -1  17 512.223 113.016   1
   3  -1 -17 413.914 120.157   2
   3  -1  19 30521.6 775.277   1
   3   1 -19 32990.9 1264.57   7
   3  -1 -19 30446.0 806.541   2
   3   1 -19 30534.3 816.043   2
   3   1 -21 163560. 2007.62   2
   3  -1 -21 166286. 1992.84   2
   3  -1 -21 172293. 2767.85   7
  -3  -1 -21 159257. 1966.61   5
   3   1 -21 174583. 2935.27   7
   3   1 -21 172601. 2221.49   3
   3   1 -23 170878. 2195.17   2
   3   1 -23 168169. 2973.94   7
  -3  -1 -23 162419. 2020.87   5
   3  -1 -23 166985. 2844.42   7
   3  -1 -23 164692. 2245.90   3
   3   1 -25 128944. 2691.49   7
   3   1 -25 136370. 2149.77   3
   3  -1 -25 126810. 2601.85   7
  -3  -1 -25 126988. 1849.92   5
  -3   1 -25 119884. 1774.32   5
  -3  -1 -25 119016. 1769.86   3
   3  -1 -25 138553. 2163.32   3
   3   1 -25 126959. 1998.30   2
   3  -1 -27 93920.6 2361.85   7
  -3   1 -27 98905.9 1698.60   3
   3   1 -27 94693.8 2449.67   7
  -3  -1 -27 93399.4 1642.28   5
  -3   1 -27 88598.0 1551.13   5
   3  -1 -27 101307. 1923.62   3
  -3  -1 -27 90332.0 1602.84   3
   3   1 -27 100001. 1907.22   3
   3  -1 -29 29199.1 1060.21   3
  -3  -1 -29 28469.5 950.431   5
  -3   1 -29 29582.7 976.227   3
  -3   1 -29 25919.3 906.018   5
   3   1 -29 28501.5 1434.56   7
   3  -1 -29 28550.8 1383.54   7
  -3  -1 -29 26543.2 922.607   3
   3   1 -29 30568.8 1119.87   3
   3  -1 -31 578.422 441.182   7
   3   1 -31-87.1644 236.607   3
   3   1 -31-191.295 459.466   7
  -3  -1 -31-56.1767 182.828   5
  -3   1 -31-225.435 191.074   3
   3   1 -33 33116.0 1613.70   7
   3  -1 -33 32739.4 1622.13   7
  -3   1 -33 34949.2 1146.67   3
  -3   1 -33 36112.3 1519.71   7
   3   1 -35 225.743 608.663   7
  -3   1 -35 1597.31 549.038   7
   3  -1 -35 613.379 440.466   7
  -3   1 -35 1136.95 258.979   3
  -3   1 -37 47626.9 1795.89   7
   3  -1 -37 45481.6 1980.88   7
  -3  -1 -37 48287.1 1799.89   7
   3   1 -37 45999.8 1984.91   7
  -3  -1 -39 57692.9 2012.48   7
  -3   1 -39 53953.8 1986.94   7
   3  -1 -39 55013.2 2137.17   7
  -3  -1 -41 64506.4 2158.48   7
  -3   1 -41 64515.0 2177.92   7
  -3   1 -43 46770.7 1840.82   7
  -3  -1 -43 48659.0 1861.53   7
  -3  -1 -45 15359.1 1060.60   7
  -3   1 -45 12279.4 953.818   7
   3  -3  -1 5183.96 222.730   1
   3  -3   1 5014.85 224.548   1
   3  -3   3 109448. 1009.64   1
   3  -3   5 220349. 1489.06   1
   3  -3   7 22192.5 508.088   1
   3  -3   9 81476.9 999.366   1
   3  -3  11 5838.83 297.212   1
   3   3 -13 296.856 126.402   2
  -3   3 -13 216.541 62.2230   2
   3  -3  13 359.726 116.445   1
   3  -3  15 2910.67 243.933   1
  -3   3 -15 2979.11 161.958   2
   3   3 -15 3031.57 257.441   2
   3   3 -17 6631.33 384.259   2
   3  -3  17 6120.25 370.996   1
  -3   3 -17 5463.10 235.721   2
  -3  -3 -19 28638.0 822.665   5
   3  -3  19 28567.1 831.738   1
   3   3 -19 27984.8 860.650   3
   3   3 -19 27704.8 805.958   2
  -3  -3 -21 670.362 179.362   5
   3   3 -21 353.057 163.466   3
   3  -3  21 717.551 181.893   1
   3  -3 -21 361.273 261.111   7
   3   3 -21 427.159 354.552   7
   3   3 -21 564.056 159.558   2
   3   3 -23 67234.4 1396.44   2
   3   3 -23 69516.7 1489.28   3
  -3  -3 -23 69288.9 1329.66   5
   3   3 -23 68168.6 2022.75   7
   3  -3 -23 65398.9 1790.56   7
   3   3 -25 93697.8 1801.17   3
  -3  -3 -25 90604.7 1553.50   5
   3  -3 -25 86777.7 2096.17   7
   3   3 -25 89110.2 1715.98   2
   3   3 -25 90973.5 2407.68   7
   3   3 -27 59762.8 2029.73   7
  -3  -3 -27 59985.3 1313.08   5
   3   3 -27 60666.9 1520.00   3
   3  -3 -27 57812.4 1785.17   7
  -3   3 -27 60720.0 1339.36   3
   3   3 -27 58565.0 1491.32   2
   3   3 -29 9151.11 643.354   2
   3   3 -29 10140.3 659.125   3
  -3  -3 -29 9679.53 572.066   5
  -3   3 -29 9864.34 571.826   3
   3   3 -29 10065.4 895.989   7
   3  -3 -29 10273.7 865.192   7
   3  -3 -31 15748.4 1101.82   7
   3   3 -31 16694.7 862.665   3
  -3   3 -31 16460.4 777.160   3
  -3  -3 -31 14923.3 759.672   5
  -3   3 -31 16479.3 1020.77   7
   3   3 -31 15547.6 1152.94   7
   3   3 -33 928.506 269.424   3
  -3   3 -33 1096.13 261.955   3
   3  -3 -33 986.688 535.287   7
   3   3 -33 176.312 550.787   7
  -3   3 -33 1632.77 494.371   7
  -3   3 -35 2094.90 319.533   3
  -3   3 -35 2065.02 495.627   7
   3  -3 -35 1718.85 524.205   7
  -3   3 -37 1669.69 303.405   3
  -3  -3 -37 2087.49 513.862   7
  -3   3 -37 1445.71 484.793   7
   3  -3 -37 983.774 449.056   7
  -3   3 -39 23560.1 1343.14   7
   3  -3 -39 24583.9 1436.45   7
  -3   3 -39 24298.1 1030.48   3
  -3  -3 -39 26777.4 1401.59   7
  -3   3 -41 17517.4 1170.98   7
  -3  -3 -41 21672.9 1276.11   7
   3  -3 -41 19175.9 1288.38   7
  -3   3 -43 18767.0 1187.33   7
  -3  -3 -43 23110.3 1288.92   7
  -3  -3 -45 4915.69 659.656   7
   3  -5   1 893514. 3017.77   1
   3  -5  -1 888109. 3006.39   1
   3  -5  -3 96985.6 1011.60   1
   3  -5   3 87876.3 986.890   1
   3  -5   5 64231.5 868.430   1
   3  -5   7 57273.8 871.243   1
   3  -5   9 97014.3 1176.53   1
   3  -5  11 12287.6 473.388   1
   3  -5  13 13592.7 519.464   1
   3  -5  15 28829.9 770.594   1
   3  -5  17 295120. 2625.08   1
   3   5 -17 291932. 2559.93   2
   3   5 -19 75046.7 1427.72   3
   3  -5  19 78447.6 1482.46   1
  -3  -5 -19 81408.0 1363.06   5
   3   5 -19 75487.7 1359.43   2
   3   5 -19 84782.0 2255.50   7
   3   5 -21 32911.2 967.718   2
  -3  -5 -21 36365.0 941.045   5
   3  -5  21 35162.7 1062.05   1
   3   5 -21 31287.2 971.529   3
   3   5 -21 35616.0 1509.62   7
  -3  -5  23-45.0263 143.378   1
   3  -5  23 137.147 146.192   1
   3   5 -23 147.551 161.520   3
   3   5 -23 93.1318 147.325   2
  -3  -5 -23 157.486 153.537   5
   3   5 -23-245.129 440.636   7
  -3  -5  25 35575.1 1124.99   1
   3   5 -25 39650.5 1696.11   7
   3  -5 -25 37153.2 1372.62   7
  -3  -5 -25 38951.3 1051.48   5
   3   5 -25 39993.2 1189.37   3
  -3   5 -25 39124.0 1434.66   7
   3   5 -25 37930.9 1145.23   2
  -3   5 -27 12069.1 874.768   7
   3   5 -27 11399.6 685.983   3
  -3  -5 -27 11462.6 607.646   5
  -3   5 -27 11850.5 616.792   3
   3   5 -27 10952.3 665.984   2
   3  -5 -27 11121.6 843.124   7
   3   5 -27 11707.4 996.832   7
  -3  -5 -29 3068.28 360.825   5
   3   5 -29 3203.50 408.856   3
  -3   5 -29 3657.82 381.378   3
   3  -5 -29 2801.71 527.001   7
  -3   5 -29 3828.59 579.598   7
   3   5 -29 3147.60 403.698   2
   3   5 -29 2401.33 546.250   7
   3  -5 -31 2502.67 550.411   7
   3   5 -31 2838.48 394.938   3
  -3   5 -31 3691.05 587.287   7
   3   5 -31 2040.33 353.895   2
   3   5 -31 1382.72 626.614   7
  -3   5 -31 2962.96 370.044   3
   3  -5 -33 3595.22 658.886   7
   3   5 -33 3890.33 448.946   3
  -3   5 -33 3906.33 413.951   3
  -3   5 -33 4119.09 633.803   7
   3   5 -35 17578.7 916.007   3
  -3   5 -35 17477.1 843.273   3
  -3   5 -35 15859.7 1116.40   7
   3  -5 -35 17015.9 1199.39   7
  -3   5 -37 22699.3 974.631   3
  -3   5 -37 19273.6 1244.96   7
   3  -5 -37 20755.4 1328.59   7
  -3   5 -39 4764.23 501.147   3
  -3   5 -39 2832.27 520.660   7
  -3  -5 -39 5686.40 758.546   7
   3  -5 -39 3598.44 680.957   7
  -3   5 -41 8076.61 602.461   3
  -3  -5 -41 7810.43 838.368   7
   3  -5 -41 6318.41 777.494   7
  -3  -5 -43 1898.19 493.498   7
  -3  -5 -45 412.063 322.930   7
   3  -7  -1 311171. 1903.63   1
   3  -7   1 311054. 1946.45   1
   3  -7  -3 3360.22 216.203   1
   3  -7   3 3497.25 246.153   1
   3  -7  -5 8304.94 328.937   1
   3  -7   5 7888.79 344.809   1
   3  -7   7 9734.94 400.967   1
   3  -7   9 41127.0 850.146   1
   3  -7  11 4071.82 303.436   1
   3  -7  13 78482.0 1314.83   1
   3  -7  15 488309. 3492.76   1
  -3  -7 -17 143327. 1750.17   5
   3  -7  17 141450. 1924.30   1
  -3  -7 -19 127595. 1725.13   5
   3  -7  19 128000. 1962.66   1
   3   7 -21 36914.5 1068.91   3
   3   7 -21 38778.0 1097.73   2
   3  -7  21 38556.7 1178.23   1
  -3  -7 -21 39836.9 1015.76   5
  -3  -7  21 37912.6 1027.10   1
  -3   7 -21 34919.9 1279.96   7
  -3  -7  23 5007.25 428.676   1
  -3  -7 -23 6517.18 451.353   5
   3  -7  23 6252.88 514.771   1
   3   7 -23 6172.27 484.185   3
  -3   7 -23 6615.27 663.223   7
   3   7 -23 6210.04 485.348   2
  -3  -7  25 216.260 151.799   1
   3   7 -25 111.660 142.295   2
   3   7 -25 87.3668 204.327   3
   3  -7  25 80.7131 160.589   1
  -3  -7 -25 165.150 206.802   5
   3  -7 -27 332.126 319.129   7
  -3  -7 -27 509.335 259.921   5
  -3   7 -27-110.725 176.557   3
   3   7 -27 60.3191 166.070   2
   3   7 -27 171.879 202.259   3
  -3   7 -27 425.920 358.771   7
   3   7 -29 1846.58 333.412   2
  -3   7 -29 1579.32 276.465   3
   3   7 -29 1860.73 338.612   3
  -3  -7 -29 1686.05 322.038   5
  -3   7 -29 2117.68 478.577   7
   3  -7 -29 1033.58 390.247   7
   3   7 -31 6919.70 617.106   2
   3   7 -31 8167.12 613.307   3
  -3   7 -31 9234.39 608.082   3
  -3   7 -31 9128.31 864.497   7
   3  -7 -31 8136.76 801.048   7
   3   7 -33 31714.9 1204.37   3
  -3   7 -33 34584.5 1167.14   3
   3  -7 -33 30960.0 1480.98   7
  -3   7 -33 31753.7 1559.98   7
  -3   7 -35 43609.0 1852.24   7
  -3   7 -35 48075.4 1383.22   3
   3   7 -35 48474.8 1517.12   3
   3  -7 -35 44847.8 1813.37   7
   3   7 -37 37249.6 1320.09   3
  -3   7 -37 38593.3 1274.69   3
   3  -7 -37 35333.5 1676.21   7
  -3   7 -37 33610.1 1639.33   7
  -3   7 -39 7657.90 606.130   3
   3  -7 -39 7349.14 835.348   7
  -3   7 -41 50.9176 204.176   3
  -3  -7 -41 791.448 418.417   7
   3  -7 -41-218.765 488.987   7
  -3   7 -43-21.2163 201.044   3
  -3  -7 -43 670.855 405.750   7
  -3  -7 -45 3972.76 567.473   7
   3  -9   1 38655.1 770.326   1
   3  -9  -1 38895.2 749.838   1
   3  -9  -3 103198. 1179.58   1
   3  -9   3 102019. 1258.91   1
   3  -9   5 2310.91 218.816   1
   3  -9  -5 2211.91 196.478   1
   3  -9   7 7398.80 384.806   1
   3  -9  -7 7309.17 327.717   1
   3  -9   9 1432.76 186.797   1
   3  -9  11 8152.77 428.294   1
   3  -9  13 184813. 2066.96   1
   3  -9  15 182196. 2156.00   1
   3   9 -15 177254. 2201.99   3
  -3  -9 -15 183540. 1986.12   5
   3   9 -17 193084. 2347.84   3
  -3  -9 -17 193995. 2129.84   5
   3  -9  17 197509. 2416.06   1
   3  -9  19 88883.6 1705.03   1
  -3  -9 -19 89580.9 1503.54   5
  -3  -9  19 91598.6 1591.91   1
   3   9 -19 85539.8 1626.70   3
  -3  -9  21 42295.0 1138.33   1
   3  -9  21 41322.7 1245.75   1
  -3  -9 -21 41718.2 1087.91   5
   3   9 -21 39334.9 1139.62   3
  -3  -9  23 8893.77 596.031   1
   3  -9  23 9415.18 657.966   1
  -3  -9 -23 10429.3 581.820   5
   3   9 -23 9627.60 608.044   3
   3   9 -23 9907.85 628.676   2
  -3  -9  25 606.846 203.273   1
   3   9 -25 820.552 263.384   2
  -3   9 -25-49.0066 394.421   7
  -3  -9 -25 823.728 269.102   5
   3  -9  25 441.223 227.751   1
   3   9 -25 111.936 180.084   3
  -3   9 -27 172.539 162.065   3
   3   9 -27 284.514 191.304   2
   3   9 -27 164.472 216.849   3
  -3  -9 -27 576.055 270.573   5
  -3   9 -27-49.5030 403.484   7
  -3  -9  27 385.147 232.041   1
   3  -9 -29 6187.10 705.979   7
   3   9 -29 6602.35 571.373   3
  -3   9 -29 5784.62 685.992   7
  -3   9 -29 6125.41 490.352   3
   3   9 -29 5879.34 561.508   2
   3   9 -31 46358.7 1415.43   3
  -3   9 -31 47857.0 1325.66   3
   3  -9 -31 44328.9 1698.51   7
  -3   9 -31 46338.7 1904.99   7
  -3   9 -33 62504.6 1555.15   3
   3  -9 -33 58889.7 1995.31   7
   3   9 -33 61222.0 1650.91   3
   3   9 -35 66830.9 1785.54   3
  -3   9 -35 69159.8 1663.05   3
   3  -9 -35 65509.8 2183.44   7
   3   9 -37 16695.1 900.213   3
  -3   9 -37 17972.8 879.371   3
   3  -9 -37 15724.1 1206.34   7
  -3   9 -39-28.1551 202.759   3
   3  -9 -39-227.882 457.308   7
   3  -9 -41-586.113 487.278   7
  -3   9 -41-526.851 260.516   3
  -3  -9 -41 299.167 391.947   7
  -3   9 -43-102.203 194.151   3
  -3  -9 -43 606.539 368.425   7
  -3  -9 -45 1759.12 425.711   7
   3 -11   1 6722.14 357.515   1
   3 -11  -1 7129.56 356.867   1
   3 -11   3 16739.9 565.502   1
   3 -11  -3 16694.9 531.155   1
   3 -11   5 13826.0 554.829   1
   3 -11  -5 12703.7 460.439   1
   3 -11   7 3120.07 282.192   1
   3 -11  -7 3456.04 245.682   1
   3 -11   9 130.361 114.171   1
  -3 -11  -9 331.356 85.3458   1
   3 -11  11 31708.3 864.231   1
  -3 -11 -13 58386.9 1159.63   5
   3  11 -13 57676.2 1301.24   6
   3  11 -13 59874.7 1344.75   3
   3 -11  13 57028.2 1229.35   1
  -3 -11  15 65892.5 1256.80   1
   3 -11  15 61146.5 1335.36   1
   3  11 -15 67524.2 1443.91   3
   3  11 -15 62676.6 1414.20   6
  -3 -11 -15 65403.2 1273.36   5
   3 -11  17 142563. 2172.61   1
   3  11 -17 140615. 2162.88   6
  -3 -11 -17 141417. 1914.36   5
   3  11 -17 143382. 2142.22   3
  -3 -11  17 142685. 1950.44   1
   3  11 -19 34618.7 1084.00   3
  -3 -11  19 34168.8 1021.92   1
   3 -11  19 36266.1 1190.14   1
  -3 -11 -19 34454.5 990.914   5
   3  11 -19 33055.0 1066.87   6
   3  11 -21 1936.21 291.646   6
   3  11 -21 1859.07 291.035   3
  -3 -11 -21 1913.93 289.019   5
   3 -11  21 1685.92 292.855   1
  -3 -11  21 2002.92 286.189   1
   3 -11  23 378.552 197.051   1
   3  11 -23 809.378 289.612   6
   3  11 -23 869.242 245.267   3
  -3 -11 -23 1097.57 305.752   5
  -3 -11  23 358.846 186.741   1
  -3 -11  25 7765.23 613.310   1
   3 -11  25 7444.37 645.317   1
  -3  11 -25 7412.72 490.793   3
   3  11 -25 8316.98 598.611   3
   3  11 -25 8498.40 649.570   2
   3  11 -27 538.474 269.964   2
   3  11 -27 622.227 245.575   3
   3 -11  27 338.347 227.951   1
  -3 -11  27 129.454 201.296   1
  -3  11 -27 603.846 195.241   3
   3  11 -29 10723.3 698.756   3
  -3  11 -29 10774.2 632.048   3
   3 -11 -29 10417.9 876.018   7
   3  11 -29 9282.12 736.206   2
   3  11 -31 43868.7 1370.89   3
  -3  11 -31 44189.9 1283.94   3
   3 -11 -31 41642.3 1667.14   7
   3  11 -33 90114.1 1997.75   3
  -3  11 -33 94452.5 1899.37   3
   3 -11 -33 89849.3 2490.10   7
  -3  11 -35 33612.5 1168.33   3
   3  11 -35 34141.0 1252.15   3
   3 -11 -35 34457.6 1596.61   7
   3  11 -37 96.8775 232.790   3
  -3  11 -37 134.173 210.835   3
   3 -11 -37 72.6437 389.703   7
  -3  11 -39 1813.62 297.838   3
   3 -11 -39 771.868 417.487   7
  -3  11 -41 7219.05 544.462   3
  -3 -11 -41 6857.48 724.990   7
   3 -11 -41 5757.02 704.780   7
  -3  11 -43 3510.26 374.664   3
  -3 -11 -43 4434.22 576.690   7
   3 -13  -1 923.068 152.550   1
   3 -13   1 1117.41 153.577   1
   3 -13  -3 3760.87 293.966   1
   3 -13   3 3349.93 286.930   1
   3 -13   5 369.673 132.289   1
   3  13  -5 244.144 153.788   6
  -3 -13  -5 109.397 82.8581   1
   3 -13  -5 521.688 135.123   1
   3 -13   7 21366.7 737.397   1
  -3 -13  -7 20509.9 529.978   1
   3  13  -7 22770.0 799.634   6
   3 -13  -7 21197.6 647.182   1
   3 -13   9 35115.3 951.287   1
   3  13  -9 38845.0 1060.31   6
   3  13 -11 9591.65 596.803   3
  -3 -13 -11 10650.0 537.483   5
   3 -13  11 8810.95 510.033   1
   3  13 -11 10819.2 589.723   6
  -3 -13  11 8961.52 487.783   1
   3  13 -13 188.936 171.120   6
   3  13 -13 16.5403 164.892   3
   3 -13  13 22.9515 128.694   1
  -3 -13 -13 296.368 184.540   5
  -3 -13  13 138.853 136.689   1
   3  13 -15 13887.3 692.902   6
   3 -13  15 16558.2 751.204   1
  -3 -13  15 15706.1 682.954   1
  -3 -13 -15 15423.7 659.997   5
   3  13 -15 16632.0 767.366   3
   3  13 -17 20064.7 853.512   6
   3 -13  17 20356.0 864.428   1
  -3 -13 -17 19517.3 769.089   5
  -3 -13  17 19226.6 784.094   1
   3  13 -17 20182.6 853.362   3
   3 -13  19 21725.2 929.788   1
  -3 -13  19 23093.3 889.450   1
   3  13 -19 23716.3 939.180   3
   3  13 -19 22802.5 911.903   6
   3  13 -21 18092.0 836.343   3
  -3 -13  21 17641.8 838.767   1
   3  13 -21 17532.9 833.261   6
   3 -13  21 16900.5 868.406   1
   3  13 -23 44942.2 1326.19   3
   3  13 -23 45710.9 1353.66   6
   3 -13  23 40675.6 1418.10   1
  -3 -13  23 39675.3 1354.89   1
  -3  13 -23 41809.9 1130.99   3
   3  13 -25 38746.3 1261.52   3
   3 -13  25 35993.0 1431.58   1
  -3 -13  25 34693.0 1343.57   1
  -3  13 -25 37522.0 1102.02   3
   3  13 -25 37900.4 1279.30   6
   3  13 -25 37174.8 1426.46   2
  -3 -13  27 15142.7 931.192   1
   3  13 -27 18301.6 900.403   3
  -3  13 -27 16812.7 763.051   3
   3 -13  27 14211.0 983.947   1
   3  13 -27 16214.4 968.295   2
   3  13 -29 694.687 270.557   2
   3  13 -29 981.946 303.178   3
  -3 -13  29 414.167 238.090   1
   3 -13 -29 1044.78 403.627   7
  -3  13 -29 1236.79 253.015   3
  -3  13 -31 12858.8 711.652   3
   3  13 -31 12872.6 748.548   3
   3 -13 -31 12513.7 954.547   7
  -3  13 -33 42995.8 1285.07   3
   3 -13 -33 42392.0 1739.85   7
   3  13 -33 41022.5 1350.38   3
  -3  13 -35 3205.41 406.650   3
   3  13 -35 2159.76 320.816   3
   3 -13 -35 2964.81 554.685   7
  -3  13 -37 548.558 214.775   3
   3 -13 -37 191.119 391.885   7
  -3  13 -39 15174.9 782.534   3
  -3 -13 -41 33682.0 1465.12   7
  -3  13 -41 33591.3 1121.80   3
  -3 -13 -43 21181.3 1120.61   7
   3 -15  -1 694.220 161.718   1
   3 -15   1 212.518 182.356   1
   3  15   1 351.885 153.263   6
   3  15  -1 540.642 189.102   6
  -3 -15   1 305.526 109.213   1
  -3 -15  -1 339.876 112.027   1
  -3 -15  -3 1717.47 206.824   1
   3  15   3 1658.58 261.708   6
   3  15  -3 1657.05 273.122   6
   3 -15   3 1154.24 189.881   1
   3 -15  -3 1753.36 231.681   1
  -3 -15   3 1568.84 205.264   1
  -3 -15  -5 99701.3 1349.19   1
   3 -15   5 98246.3 1643.37   1
   3  15  -5 96970.5 1737.13   6
   3 -15  -5 96414.2 1503.77   1
  -3 -15   5 98269.0 1528.59   1
   3 -15   7 56870.3 1291.40   1
   3  15  -7 61142.5 1397.82   6
   3 -15  -7 58897.2 1183.66   1
  -3 -15   7 62266.9 1233.90   1
   3  15  -9 77769.1 1581.56   6
  -3 -15   9 80158.0 1440.43   1
   3 -15  11 76974.5 1584.68   1
   3  15 -11 78894.8 1618.17   6
   3  15 -11 75214.4 1760.97   3
  -3 -15  11 78679.9 1479.97   1
   3  15 -13 23841.0 966.238   3
   3 -15  13 21900.9 877.352   1
   3  15 -13 23018.6 907.910   6
  -3 -15  13 21219.5 808.934   1
   3 -15  15 10826.6 663.521   1
   3  15 -15 10540.5 636.830   6
   3  15 -15 11160.0 676.587   3
  -3 -15  15 10306.0 607.044   1
  -3 -15  17 2512.36 337.086   1
   3  15 -17 2388.78 344.683   6
   3  15 -17 2575.38 354.884   3
   3 -15  17 2355.63 329.580   1
   3  15 -19 2149.68 334.648   3
   3  15 -19 2041.31 323.160   6
   3 -15  19 1432.06 261.455   1
  -3 -15  19 2197.50 313.574   1
   3  15 -21 7953.57 594.290   3
   3  15 -21 7516.58 576.612   6
   3 -15  21 7164.46 602.073   1
  -3 -15  21 7455.90 610.522   1
  -3  15 -21 8161.03 510.473   3
   3 -15  23 85088.2 2128.95   1
   3  15 -23 91184.2 1942.15   3
   3  15 -23 88042.4 1921.00   6
  -3 -15  23 88788.2 2070.10   1
  -3  15 -23 86839.5 1653.79   3
   3  15 -25 80141.3 1853.56   3
  -3  15 -25 74912.6 1564.51   3
   3 -15  25 69057.1 2038.50   1
  -3 -15  25 72771.0 2001.81   1
   3  15 -25 73463.2 2111.46   2
   3  15 -25 77101.3 1822.80   6
   3  15 -27 62463.2 1624.28   3
  -3  15 -27 62764.1 1480.51   3
   3 -15  27 52504.0 1893.50   1
   3  15 -27 51764.4 1817.59   2
  -3 -15  27 53405.2 1815.61   1
   3  15 -27 59833.0 1630.42   6
  -3  15 -29 11152.8 655.136   3
   3  15 -29 10936.6 698.300   3
  -3  15 -31 454.151 175.520   3
   3  15 -31 527.050 209.315   3
   3  15 -33 124.264 285.706   3
  -3  15 -33 1212.03 277.466   3
   3  15 -35 276.717 271.134   3
  -3  15 -35 644.671 249.125   3
  -3  15 -37 3332.23 387.216   3
  -3  15 -39 23830.0 931.259   3
  -3  15 -41 39473.3 1145.78   3
  -3 -15 -41 39390.7 1477.74   7
   3  17   1 16548.1 802.468   6
   3  17  -1 15784.8 767.602   6
  -3 -17  -1 16035.1 631.547   1
  -3 -17   1 16159.7 662.843   1
   3 -17   1 16611.0 725.912   1
   3 -17  -1 16503.8 721.449   1
  -3 -17  -3 4466.57 344.003   1
   3  17   3 4359.73 445.132   6
  -3 -17   3 4128.84 353.017   1
   3 -17   3 3970.97 380.732   1
   3  17  -3 3450.97 385.169   6
   3 -17  -3 4347.55 370.856   1
   3 -17  -5 52641.3 1237.23   1
   3  17   5 48213.2 1410.69   6
   3  17  -5 51794.3 1370.65   6
  -3 -17   5 51811.7 1230.12   1
   3 -17   5 53552.4 1329.73   1
  -3 -17  -5 49076.4 1055.17   1
   3  17  -7 118659. 2042.95   6
   3 -17   7 116061. 1991.71   1
  -3 -17   7 116608. 1885.84   1
   3  17  -9 117922. 2042.89   6
   3 -17   9 115789. 2022.46   1
  -3 -17   9 121002. 1951.04   1
  -3 -17  11 72308.1 1557.67   1
   3 -17  11 69973.5 1609.56   1
   3  17 -11 72949.5 1624.27   6
   3  17 -13 28703.3 1154.91   3
   3  17 -13 30065.6 1076.28   6
   3 -17  13 29131.8 1070.11   1
  -3 -17  13 29609.6 1024.84   1
  -3 -17  15 21.2884 152.504   1
   3  17 -15-143.196 199.095   6
   3 -17  15-233.654 233.137   1
   3  17 -15 120.013 199.727   3
   3  17 -17 3785.72 420.461   6
  -3 -17  17 3610.45 416.310   1
  -3  17 -17 3200.71 321.236   3
   3 -17  17 2799.31 359.369   1
   3  17 -17 3887.98 446.490   3
   3  17 -19 887.567 261.376   6
   3 -17  19 772.072 242.209   1
  -3 -17  19 1005.31 275.049   1
  -3  17 -19 874.264 219.136   3
   3  17 -19 620.035 224.042   3
   3  17 -21 9657.19 667.164   3
   3  17 -21 8260.34 625.851   6
  -3  17 -21 8985.00 555.103   3
   3 -17  21 8316.43 686.736   1
  -3 -17  21 8952.85 673.597   1
   3  17 -23 27064.8 1088.19   3
  -3  17 -23 28198.5 974.151   3
   3 -17  23 26315.5 1242.38   1
  -3 -17  23 28854.6 1278.30   1
   3  17 -23 26318.3 1085.85   6
  -3  17 -25 119107. 2030.12   3
   3  17 -25 117701. 2230.27   3
   3  17 -25 115141. 2273.45   6
   3  17 -27 60454.6 1601.98   3
   3  17 -27 62604.3 1656.32   6
  -3  17 -27 61620.7 1494.75   3
   3  17 -29 9699.72 666.562   3
  -3  17 -29 9092.07 595.074   3
  -3  17 -31 12834.7 701.831   3
   3  17 -31 12487.2 737.338   3
  -3  17 -33 51.5752 166.537   3
   3  17 -33-590.365 303.334   3
  -3  17 -35 509.986 213.967   3
  -3  17 -37 1744.73 288.654   3
  -3  17 -39 11634.5 625.147   3
  -3 -17 -39 11924.3 835.571   7
   3 -19  -1 13050.3 704.873   1
   3  19   1 12749.5 758.482   6
   3  19  -1 12813.8 756.938   6
  -3 -19  -1 12588.3 624.003   1
  -3 -19   1 12643.5 646.133   1
   3 -19   1 13633.9 730.309   1
  -3 -19   3-80.7574 155.820   1
   3  19   3 359.240 241.622   6
   3  19  -3 146.738 248.980   6
   3 -19  -3 28.8915 169.288   1
   3 -19   3-215.040 198.471   1
   3 -19   5 18747.6 871.975   1
   3  19   5 19739.7 1001.81   6
   3  19  -5 18645.8 877.936   6
  -3 -19   5 18140.9 816.223   1
   3 -19   7 50456.7 1442.08   1
   3  19   7 49743.3 1612.75   6
   3  19  -7 51305.5 1430.98   6
  -3 -19   7 51807.4 1372.88   1
   3  19  -9 84955.7 1831.83   6
   3 -19   9 79848.2 1826.41   1
  -3 -19   9 81202.4 1773.35   1
   3  19 -11 34821.1 1190.36   6
   3 -19  11 33700.8 1209.35   1
  -3 -19  11 36049.4 1201.09   1
   3 -19  13 422.802 162.349   1
  -3 -19  13 770.292 223.402   1
   3  19 -13 1049.89 287.353   6
  -3  19 -13 984.438 207.795   3
   3  19 -15 16838.4 927.422   3
   3  19 -15 18222.8 888.186   6
   3 -19  15 14631.1 833.320   1
  -3 -19  15 16395.3 866.412   1
  -3  19 -15 16917.2 728.068   3
   3  19 -17 4552.30 490.592   6
   3  19 -17 4061.98 459.510   3
  -3 -19  17 3178.19 411.856   1
   3 -19  17 2869.60 410.975   1
  -3  19 -17 3648.85 369.901   3
   3  19 -19 45.6269 225.588   3
  -3  19 -19 116.024 151.635   3
  -3 -19  19-25.8738 212.949   1
   3  19 -19-334.007 257.608   6
   3 -19  19-301.316 276.303   1
  -3  19 -21 2551.83 330.138   3
   3  19 -21 2073.05 337.092   3
   3  19 -21 1464.73 303.172   6
   3  19 -23 15327.8 839.926   6
  -3  19 -23 14211.2 811.665   6
  -3  19 -23 15426.3 747.930   3
   3  19 -23 15155.6 818.383   3
   3  19 -25 31808.3 1184.34   3
   3  19 -25 32604.8 1208.00   6
  -3  19 -25 31778.6 1076.67   3
   3  19 -27 29080.2 1136.12   6
   3  19 -27 28900.0 1133.18   3
  -3  19 -27 29314.6 1037.05   3
  -3  19 -29 21764.4 900.829   3
   3  19 -29 20730.6 945.707   3
  -3  19 -31-202.176 197.205   3
  -3  19 -33 1065.66 251.813   3
  -3  19 -35 2829.84 346.569   3
  -3  19 -37-157.633 177.739   3
   3  21   1 14942.2 874.690   6
   3  21  -1 15281.9 866.565   6
  -3 -21   1 12857.8 725.079   1
   3 -21  -1 13690.5 782.728   1
   3 -21   1 14341.0 812.088   1
   3 -21   3 7908.15 635.233   1
   3  21  -3 9396.81 671.180   6
   3  21   3 8437.21 692.858   6
  -3 -21   3 7756.57 573.529   1
  -3 -21   5 1265.12 265.154   1
   3  21   5 1797.43 383.093   6
   3  21  -5 1523.30 344.609   6
   3 -21   5 1733.14 342.446   1
   3  21  -7 18386.4 906.418   6
  -3 -21   7 18435.1 907.259   1
   3 -21   7 17007.1 907.448   1
   3  21   7 18564.6 1065.34   6
   3  21  -9 15424.1 839.175   6
   3 -21   9 15245.1 873.681   1
  -3 -21   9 15190.5 846.001   1
   3  21 -11 4206.31 467.043   6
   3 -21  11 3745.12 460.644   1
  -3 -21  11 3760.00 452.383   1
   3  21 -13 22729.5 996.247   6
   3 -21  13 19886.2 1031.20   1
  -3 -21  13 20436.0 1029.70   1
   3  21 -15 28909.8 1134.14   6
  -3  21 -15 26183.0 929.664   3
   3 -21  15 25675.9 1192.64   1
  -3 -21  15 27030.8 1212.73   1
  -3  21 -17 15571.2 735.546   3
   3  21 -17 16517.6 862.437   6
   3  21 -19 4123.80 465.923   3
   3  21 -19 4570.57 481.829   6
  -3  21 -19 4326.99 405.720   3
   3  21 -21 805.731 221.611   3
   3  21 -21 851.839 234.829   6
  -3  21 -21 928.465 234.396   3
   3  21 -23 7429.11 575.514   3
   3  21 -23 9014.35 636.716   6
  -3  21 -23 8908.39 649.650   6
  -3  21 -23 8727.27 571.965   3
   3  21 -25 2300.65 356.843   6
  -3  21 -25 2573.16 367.147   6
   3  21 -25 1707.95 259.296   3
  -3  21 -25 2443.14 320.580   3
   3  21 -27 11270.1 706.449   6
  -3  21 -27 10388.5 627.267   3
  -3  21 -29 154.963 166.786   3
  -3  21 -31 1517.17 275.610   3
  -3  21 -33 9656.72 588.439   3
  -3  21 -35 9510.62 568.080   3
   3  23   1 25509.7 1186.58   6
   3  23  -1 24759.4 1149.38   6
   3 -23   3 6500.40 612.535   1
  -3 -23   3 6749.10 570.524   1
   3  23   3 8633.03 753.080   6
   3  23  -3 7981.35 658.152   6
   3  23   5 1041.56 351.111   6
   3  23  -5 1442.20 349.626   6
   3 -23   5 1041.10 316.856   1
  -3 -23   5 1065.53 267.010   1
   3 -23   7 889.482 292.904   1
  -3 -23   7 533.389 182.998   1
   3  23  -7 915.026 333.871   6
   3  23  -9 1495.43 345.777   6
  -3 -23   9 967.823 286.024   1
   3 -23   9 2016.16 401.701   1
   3  23 -11 12691.2 784.542   6
   3  23 -13 9762.47 677.183   6
   3  23 -15 21782.8 986.872   6
   3  23 -17 42583.1 1366.93   6
   3  23 -19 14692.7 807.767   6
  -3  23 -21 1201.55 294.918   6
  -3  23 -21 772.604 161.857   3
   3  23 -23 144.443 196.740   6
  -3  23 -23-132.289 231.999   6
  -3  23 -23 57.1622 168.433   3
  -3  23 -25 6355.48 506.873   3
  -3  23 -25 5880.29 505.720   6
   3  23 -25 6915.85 559.088   6
   3  23 -27-7.58002 170.581   6
  -3  23 -27 85.7726 157.867   3
  -3  23 -29 1628.60 281.270   3
  -3  23 -31 13024.6 663.697   3
   3  25   1 31623.1 1361.94   6
   3  25  -1 30567.4 1286.58   6
   3  25  -3 15958.9 927.808   6
   3  25   3 15715.0 1008.17   6
   3  25  -5 1645.80 358.766   6
   3  25   5 1879.70 385.489   6
   3  25  -7-380.037 333.817   6
   3  25  -9 2807.54 390.349   6
   3  25 -11 1237.96 265.655   6
   3  25 -13 9262.03 656.232   6
   3  25 -15 25795.1 1082.02   6
   3  25 -17 43722.9 1400.76   6
  -3  25 -17 45023.3 1382.24   6
   3  25 -19 43003.5 1351.32   6
  -3  25 -19 45511.2 1381.84   6
   3  25 -21 8319.62 632.947   6
  -3  25 -21 8541.91 613.315   6
   3  25 -23 904.985 284.344   6
  -3  25 -23 379.480 190.815   6
   3  25 -25 630.289 209.962   6
  -3  25 -25 563.636 202.885   6
   3  25 -27-173.394 184.164   6
   3  27   1 20549.3 1100.56   6
   3  27  -1 20298.6 1061.26   6
   3  27   3 12947.3 916.086   6
   3  27  -3 12443.5 825.887   6
   3  27   5 1240.03 380.677   6
   3  27  -5 1238.47 311.559   6
   3  27  -7-82.6393 230.921   6
   3  27  -9 1944.05 363.002   6
   3  27 -11 10.9904 255.491   6
   3  27 -13 4081.01 458.122   6
   3  27 -15 19222.8 909.384   6
  -3  27 -15 18888.3 900.986   6
   3  27 -17 28072.0 1070.70   6
  -3  27 -17 28093.4 1092.37   6
   3  27 -19 18378.2 857.420   6
  -3  27 -19 19162.7 884.723   6
  -3  27 -21 3979.21 410.947   6
   3  27 -21 4242.70 427.038   6
   3  27 -23 460.424 184.789   6
  -3  27 -23 75.4865 151.826   6
   3  27 -25 808.875 214.324   6
   3  29   1 4420.98 523.393   6
   3  29  -1 4125.65 477.812   6
   3  29   3 1.91956 256.675   6
   3  29  -3 53.8559 259.756   6
   3  29  -5-5.90813 245.147   6
   3  29  -7 7856.64 620.897   6
  -3  29   7 5963.71 545.341   6
  -3  29  -7 7856.10 594.065   6
   3  29  -9 12546.8 764.307   6
  -3  29  -9 13205.7 769.432   6
  -3  29 -11 5963.18 538.979   6
   3  29 -11 5320.53 497.775   6
   3  29 -13-280.898 220.657   6
  -3  29 -13 35.0886 192.312   6
   3  29 -15 6215.83 510.969   6
  -3  29 -15 6704.98 529.026   6
  -3  29 -17 7812.39 563.649   6
   3  29 -17 7497.63 542.463   6
   3  29 -19 3142.03 357.634   6
  -3  29 -19 2674.04 324.469   6
   3  29 -21-134.646 159.244   6
   3  31   1 781.584 266.517   6
   3  31  -1 544.371 242.608   6
  -3  31   1 403.189 186.521   6
  -3  31  -1 371.185 207.299   6
   3  31  -3 136.524 209.195   6
  -3  31   3-153.865 209.125   6
  -3  31  -3-301.892 243.226   6
  -3  31  -5 6709.93 537.075   6
   3  31  -5 5480.55 500.632   6
   3  31  -7 10762.5 663.981   6
  -3  31  -7 12096.0 700.994   6
   3  31  -9 12020.6 695.150   6
  -3  31  -9 14057.3 729.183   6
   3  31 -11 8261.40 572.174   6
  -3  31 -11 8411.40 572.905   6
   3  31 -13 679.300 217.311   6
  -3  31 -13 74.7305 176.951   6
  -3  31 -15 867.919 219.946   6
   3  31 -15 1251.23 267.709   6
   4   0   0 109589. 854.112   2
   4   0   2 222748. 1063.96   2
   4   0  -2 218864. 1336.76   2
   4   0  -4 999999. 3105.82   2
   4   0  -6 119171. 1140.44   2
   4   0  -8 167397. 1450.93   2
   4   0 -10 476864. 2587.10   2
   4   0 -12 114811. 1354.91   2
   4   0  14 148755. 1497.43   1
   4   0 -14 158558. 1672.50   2
   4   0 -16 17808.7 599.971   2
   4   0 -18 30547.1 830.037   2
   4   0 -20 60045.3 1240.68   2
   4   0 -20 58221.5 1295.55   3
   4   0 -20 62481.4 1910.34   7
   4   0 -22 554601. 4161.85   3
   4   0 -22 539664. 3898.54   2
  -4   0 -22 549508. 3893.07   5
   4   0 -22 546136. 5641.80   7
   4   0 -24 327551. 3260.10   2
  -4   0 -24 334213. 3103.22   5
   4   0 -24 328791. 4545.56   7
   4   0 -26 260411. 4158.91   7
  -4   0 -26 271988. 2782.14   5
  -4   0 -28 110483. 1838.12   3
  -4   0 -28 106487. 1815.71   5
   4   0 -28 111439. 2788.56   7
  -4   0 -30 40852.6 1156.88   3
  -4   0 -30 41930.7 1171.15   5
   4   0 -30 38857.4 1768.18   7
  -4   0 -32 14194.2 724.546   3
  -4   0 -32 12965.4 709.786   5
   4   0 -32 13297.3 1098.69   7
   4   0 -34 24269.5 1464.22   7
  -4   0 -36 98063.8 2467.59   7
   4   0 -36 90595.3 2813.14   7
  -4   0 -38 63088.7 2063.80   7
  -4   0 -40 115521. 2814.53   7
  -4   0 -42 96998.8 2592.31   7
  -4   0 -44 75506.9 2213.70   7
   4  -2  -4 17103.6 414.606   2
   4  -2   4 16203.1 455.897   1
   4  -2   6 34974.9 669.749   1
   4   2  -6 34378.2 646.031   2
   4  -2  -6 34718.4 620.965   2
   4   2  -8 268033. 1910.56   2
   4  -2   8 266782. 1885.08   1
   4  -2  10 178433. 1610.60   1
   4   2 -10 175615. 1614.98   2
   4  -2 -12 89673.9 1194.19   2
   4  -2  12 86485.1 1158.08   1
   4   2 -12 90665.5 1253.56   2
   4  -2  14 5188.98 317.562   1
   4   2 -14 5708.16 335.139   2
   4  -2 -14 5909.84 334.992   2
   4  -2 -16 3067.98 262.659   2
   4  -2  16 3380.02 270.129   1
   4   2 -16 3152.42 263.799   2
   4   2 -18 10875.2 892.176   7
   4  -2 -18 10218.6 493.254   2
   4  -2  18 10030.2 485.747   1
   4   2 -18 10296.7 499.194   2
   4   2 -20 67275.7 2043.87   7
   4  -2  20 63173.5 1289.65   1
  -4  -2 -20 62974.3 1312.76   5
   4  -2 -20 66926.1 1857.46   7
   4   2 -20 62330.6 1271.83   2
   4   2 -20 65666.7 1380.97   3
   4   2 -22 117347. 1851.92   2
  -4  -2 -22 117239. 1790.47   5
   4   2 -22 121325. 2780.68   7
   4  -2 -22 118934. 2548.69   7
   4   2 -22 119645. 1945.99   3
   4   2 -24 243462. 2822.11   2
   4   2 -24 254423. 2976.48   3
   4   2 -24 246501. 4031.82   7
  -4  -2 -24 244645. 2597.01   5
  -4   2 -24 239781. 2613.98   5
   4  -2 -24 244420. 3728.91   7
   4   2 -26 137725. 3131.74   7
   4   2 -26 134208. 2227.04   2
  -4  -2 -26 133124. 1974.70   5
  -4   2 -26 137508. 1984.38   5
   4  -2 -26 136606. 2889.83   7
   4   2 -26 143947. 2328.00   3
   4   2 -28 75323.0 2393.13   7
   4   2 -28 71735.6 1733.45   2
  -4  -2 -28 73684.5 1520.21   5
  -4   2 -28 74043.4 1480.21   5
   4  -2 -28 71212.3 2230.71   7
   4   2 -28 78276.4 1791.74   3
   4   2 -30 141.599 538.172   7
  -4  -2 -30 313.769 206.526   5
  -4   2 -30 183.253 165.201   3
   4  -2 -30-104.122 474.227   7
  -4   2 -32 6309.63 511.018   3
  -4  -2 -32 5995.44 509.208   5
   4  -2 -32 6159.74 820.898   7
   4   2 -32 5299.62 727.274   7
  -4   2 -34 1652.14 287.754   3
  -4   2 -34 2325.94 509.887   7
   4  -2 -34 876.327 532.820   7
   4  -2 -36 4610.66 703.095   7
  -4   2 -36 6232.11 515.887   3
  -4   2 -36 6029.91 751.908   7
   4  -2 -38 46760.1 2018.41   7
  -4  -2 -38 51232.4 1836.24   7
  -4   2 -38 48970.8 1837.36   7
  -4   2 -40 66273.5 2176.33   7
  -4  -2 -40 72581.8 2209.22   7
  -4   2 -42 66531.2 2154.63   7
  -4  -2 -42 74214.8 2231.92   7
  -4  -2 -44 40439.7 1642.32   7
  -4   2 -44 35991.7 1541.54   7
  -4  -2 -46 14230.1 962.288   7
   4  -4   0 48015.5 782.250   1
   4  -4   2 113297. 1193.46   1
   4  -4   4 138562. 1362.94   1
   4  -4   6 52753.4 850.098   1
   4  -4   8 69516.3 1007.40   1
   4  -4  10 31843.0 737.255   1
   4  -4  12 2874.92 248.829   1
   4   4 -14 14750.9 556.648   2
   4  -4  14 14523.1 555.318   1
   4  -4  16 302074. 2618.78   1
   4   4 -16 302033. 2560.13   2
   4  -4  18 42050.8 1048.87   1
   4   4 -18 41537.5 1076.21   3
   4   4 -18 43104.5 1050.39   2
  -4  -4 -18 45623.5 1073.06   5
   4   4 -20 22547.6 832.744   3
   4  -4  20 21745.6 809.541   1
  -4  -4 -20 24832.8 812.547   5
   4   4 -20 24455.5 1308.08   7
   4  -4 -20 22155.3 1071.79   7
   4   4 -20 22116.3 794.303   2
   4   4 -22-55.4445 177.331   2
   4  -4 -22-16.5918 299.152   7
  -4  -4 -22 375.107 188.615   5
   4   4 -22 416.609 191.992   3
   4   4 -22-27.5846 489.936   7
   4  -4  22 310.776 153.716   1
  -4  -4  24 16626.6 752.470   1
  -4  -4 -24 18869.5 736.750   5
   4   4 -24 18249.5 1184.38   7
   4   4 -24 18884.7 834.660   3
   4   4 -24 19230.4 819.363   2
   4  -4 -24 18179.5 1063.22   7
   4   4 -26 41578.2 1277.38   2
   4   4 -26 42980.8 1295.93   3
   4  -4 -26 41674.5 1621.85   7
  -4  -4 -26 40420.4 1102.58   5
   4   4 -26 41336.2 1799.13   7
   4   4 -28 130.112 153.634   2
   4   4 -28 119.433 195.572   3
   4   4 -28-661.394 658.706   7
  -4  -4 -28-220.223 248.464   5
   4  -4 -28 381.037 418.538   7
  -4   4 -30 623.611 368.371   7
   4   4 -30-114.900 186.238   2
   4   4 -30 152.548 206.609   3
  -4  -4 -30 37.1552 217.133   5
  -4   4 -30 52.9307 161.440   3
   4  -4 -30-142.139 400.495   7
  -4  -4 -32 137.086 217.684   5
   4  -4 -32 235.876 439.269   7
  -4   4 -32 544.758 385.288   7
  -4   4 -32 134.241 172.642   3
  -4   4 -34 16765.9 1081.25   7
  -4   4 -34 17216.4 839.352   3
   4  -4 -34 14728.7 1134.33   7
  -4   4 -36 17499.7 1141.51   7
  -4   4 -36 20117.9 899.937   3
   4  -4 -36 18283.1 1246.21   7
  -4   4 -38 340.503 197.661   3
   4  -4 -38-340.571 490.050   7
  -4   4 -38 38.6471 344.188   7
  -4   4 -40 7554.03 576.854   3
  -4   4 -40 5936.42 728.777   7
  -4  -4 -40 7836.50 811.963   7
  -4   4 -42 8371.19 798.911   7
  -4  -4 -42 10720.4 924.864   7
  -4  -4 -44 5446.16 675.622   7
   4  -6   0 664561. 3011.62   1
   4  -6  -2 299098. 2053.20   1
   4  -6   2 290926. 2012.57   1
   4  -6   4 14402.2 462.475   1
   4  -6   6 76200.6 1101.49   1
   4  -6   8 18909.1 585.974   1
   4  -6  10 525.427 153.928   1
   4  -6  12 20398.0 658.491   1
   4  -6  14 355492. 2869.87   1
   4   6 -16 241271. 2576.42   3
  -4  -6 -16 249935. 2386.18   5
   4  -6  16 243701. 2550.08   1
  -4  -6 -18 236103. 2384.24   5
   4   6 -18 229926. 2514.47   2
   4  -6  18 233022. 2660.40   1
   4  -6  20 95551.9 1830.51   1
   4   6 -20 86831.0 1654.03   3
   4   6 -20 75908.9 1516.81   6
  -4  -6 -20 92782.7 1535.12   5
   4   6 -20 93299.1 1676.36   2
   4  -6 -20 82466.2 2022.85   7
   4  -6  22 37044.4 1227.78   1
   4   6 -22 33141.5 1068.94   2
   4   6 -22 34629.6 1091.53   3
  -4  -6 -22 35022.7 983.084   5
   4  -6 -22 31910.4 1334.63   7
   4   6 -24 5939.15 493.744   3
   4   6 -24 5231.77 447.765   2
   4  -6  24 5511.84 520.497   1
  -4  -6  24 5221.88 441.064   1
  -4  -6 -24 5795.03 440.071   5
   4  -6 -24 5608.28 637.471   7
  -4   6 -24 5952.05 620.263   7
  -4  -6  26 4173.12 431.516   1
   4   6 -26 4307.52 432.081   2
  -4  -6 -26 4122.00 389.794   5
   4  -6 -26 4774.33 620.524   7
  -4   6 -26 5498.44 635.003   7
   4   6 -26 4102.92 446.159   3
   4   6 -28 1120.66 262.894   2
  -4  -6 -28 1270.46 284.097   5
   4  -6 -28 1290.98 468.656   7
   4   6 -28 1169.52 292.480   3
   4   6 -30 5617.48 546.925   3
  -4  -6 -30 5627.56 494.223   5
  -4   6 -30 5467.67 458.646   3
  -4   6 -30 6060.52 718.403   7
   4   6 -30 5303.89 537.634   2
   4  -6 -30 5682.87 731.557   7
   4   6 -32 49037.5 1521.97   3
  -4   6 -32 48300.2 1816.31   7
   4  -6 -32 44381.9 1847.57   7
  -4   6 -34 51969.4 1922.93   7
   4  -6 -34 51717.5 1995.08   7
   4  -6 -36 36059.6 1752.57   7
  -4   6 -36 41072.2 1296.93   3
  -4   6 -36 36536.5 1642.72   7
   4  -6 -38 23599.9 1474.81   7
  -4   6 -38 23529.6 1376.41   7
  -4  -6 -40 11469.8 929.665   7
   4  -6 -40 8897.09 919.160   7
  -4   6 -40 11505.6 711.235   3
  -4   6 -40 8113.78 799.880   7
  -4   6 -42 1265.37 266.954   3
  -4  -6 -42 1956.50 477.274   7
  -4  -6 -44 473.408 374.700   7
   4  -8   0 452733. 2648.72   1
   4  -8   2 158670. 1596.61   1
   4  -8  -2 169279. 1620.72   1
   4  -8  -4 44703.8 838.323   1
   4  -8   4 42454.6 858.209   1
   4  -8   6 1689.29 202.922   1
   4  -8   8 253.966 106.465   1
   4  -8  10 197.592 126.817   1
   4  -8  12 387233. 3014.34   1
   4  -8  14 241132. 2504.40   1
  -4  -8 -14 240336. 2291.17   5
   4   8 -14 235608. 2626.92   3
   4  -8  16 194784. 2398.25   1
  -4  -8 -16 192376. 2093.84   5
   4   8 -16 189085. 2409.06   3
   4   8 -18 289362. 3062.66   3
  -4  -8 -18 302242. 2701.59   5
   4   8 -18 286550. 2986.12   6
   4  -8  18 311115. 3210.07   1
  -4  -8 -20 170403. 2078.39   5
   4   8 -20 173618. 2433.65   2
   4  -8  20 177787. 2606.84   1
   4   8 -22 85249.0 1752.37   3
  -4  -8  22 87449.9 1715.79   1
   4   8 -22 79215.2 1668.68   6
  -4  -8 -22 91634.3 1594.53   5
   4  -8 -22 78994.2 2067.77   7
   4  -8  22 96402.3 2073.96   1
   4   8 -22 89557.2 1798.26   2
   4   8 -24 20628.2 894.717   3
  -4  -8  24 21082.2 908.054   1
  -4  -8 -24 22867.1 848.178   5
   4   8 -24 21509.4 942.051   2
   4  -8 -24 19505.8 1105.29   7
   4  -8  24 23799.6 1114.68   1
   4   8 -26 14653.8 828.251   2
   4   8 -26 14366.7 798.740   3
  -4  -8  26 14981.1 817.860   1
   4  -8 -26 15215.2 1016.70   7
  -4  -8 -26 16297.0 758.414   5
   4   8 -28 8792.51 668.331   2
   4   8 -28 9268.48 644.444   3
  -4  -8 -28 9614.74 613.999   5
  -4   8 -28 9315.56 577.981   3
   4  -8 -28 9282.56 854.945   7
   4   8 -30 42613.7 1534.28   2
   4   8 -30 48120.1 1483.71   3
  -4   8 -30 48271.5 1310.92   3
  -4  -8 -30 48195.7 1350.83   5
  -4   8 -30 47251.8 1800.07   7
   4  -8 -30 44436.3 1762.90   7
  -4   8 -32 83708.2 2492.64   7
   4  -8 -32 78006.4 2392.35   7
  -4   8 -32 90637.6 1837.01   3
   4   8 -32 84919.4 1979.14   3
  -4   8 -34 88161.2 2577.72   7
   4  -8 -34 94507.8 2664.18   7
  -4   8 -36 87115.8 1880.66   3
   4  -8 -36 80423.6 2510.73   7
  -4   8 -38 40531.9 1285.20   3
   4  -8 -38 36315.1 1709.52   7
  -4   8 -40 8746.79 622.051   3
   4  -8 -40 7113.39 842.155   7
  -4   8 -42 2522.50 346.466   3
  -4  -8 -42 3637.53 575.145   7
  -4  -8 -44 10823.3 841.737   7
   4 -10   0 61959.6 1057.59   1
   4 -10  -2 87106.7 1240.77   1
   4 -10   2 88182.8 1299.31   1
   4 -10   4 39831.0 897.441   1
   4 -10  -4 39527.2 839.318   1
   4 -10   6 6008.75 363.395   1
   4 -10  -6 6499.60 341.619   1
   4 -10   8 2741.68 254.871   1
   4 -10  10 141601. 1868.17   1
   4  10 -12 91974.5 1604.40   6
   4 -10  12 90252.7 1575.67   1
  -4 -10 -12 91257.9 1412.27   5
   4  10 -12 90307.7 1699.43   3
   4  10 -14 270910. 3001.84   3
   4  10 -14 270276. 2837.70   6
   4 -10  14 262486. 2794.05   1
  -4 -10 -14 269288. 2477.94   5
   4  10 -16 210800. 2616.65   6
   4 -10  16 206614. 2598.02   1
  -4 -10 -16 208159. 2236.27   5
   4  10 -16 206940. 2669.98   3
   4  10 -18 151421. 2336.53   3
   4  10 -18 153618. 2265.88   6
  -4 -10 -18 153227. 1980.24   5
   4 -10  18 156307. 2374.92   1
   4  10 -20 105009. 1929.73   6
  -4 -10  20 107111. 1871.39   1
  -4 -10 -20 105988. 1694.02   5
   4 -10  20 104449. 2072.25   1
   4  10 -20 102682. 1967.04   3
   4  10 -22 24116.5 983.403   3
   4  10 -22 24977.7 970.976   6
  -4 -10  22 26079.2 968.336   1
  -4 -10 -22 26035.8 898.121   5
   4 -10  22 26450.7 1131.62   1
   4  10 -22 25928.3 1059.22   2
   4  10 -24 19144.7 902.327   3
   4  10 -24 19106.5 868.929   6
  -4 -10  24 17899.1 923.582   1
  -4 -10 -24 19623.3 814.809   5
   4  10 -24 19015.7 944.492   2
   4 -10 -24 16562.1 1025.67   7
   4 -10  24 21140.8 1102.48   1
   4  10 -26 4100.96 465.190   3
  -4 -10  26 3734.62 464.730   1
  -4 -10 -26 4368.27 445.035   5
   4 -10 -26 3953.51 598.678   7
   4  10 -26 4201.37 485.531   2
   4 -10  26 4615.34 562.525   1
   4  10 -28 14692.8 806.319   3
   4 -10 -28 14455.3 1025.63   7
  -4 -10 -28 15825.6 776.534   5
  -4  10 -28 14524.9 722.997   3
   4  10 -28 13540.6 881.910   2
  -4  10 -30 57024.5 1423.04   3
   4 -10 -30 53133.1 1936.01   7
   4  10 -30 56349.1 1599.63   3
   4 -10 -32 90407.0 2512.15   7
   4  10 -32 93565.3 2066.84   3
  -4  10 -32 97101.3 1918.67   3
   4 -10 -34 98491.1 2769.13   7
  -4  10 -34 108628. 2084.01   3
   4 -10 -36 64736.9 2256.25   7
  -4  10 -36 70918.6 1681.30   3
   4 -10 -38 12745.9 1026.96   7
  -4  10 -38 14133.1 773.951   3
  -4  10 -40 580.213 222.240   3
   4 -10 -40 206.469 448.522   7
  -4  10 -42 275.417 174.299   3
  -4 -10 -42 230.993 343.086   7
  -4 -10 -44 7623.78 720.609   7
   4 -12   0 70114.6 1225.79   1
   4 -12  -2 3773.48 294.727   1
   4 -12   2 3605.65 302.410   1
   4 -12  -4 2287.59 235.734   1
   4 -12   4 2316.47 251.806   1
   4 -12  -6 4845.10 323.754   1
   4 -12   6 4877.27 357.353   1
   4  12  -8 460.834 175.037   6
   4 -12   8-85.9211 146.059   1
   4  12 -10 10638.6 636.316   3
   4  12 -10 12700.1 624.514   6
   4 -12  10 10366.9 563.499   1
  -4 -12 -10 12179.1 536.134   5
   4  12 -12 14353.3 732.044   3
   4 -12  12 14273.8 671.868   1
  -4 -12 -12 12688.9 571.239   5
   4  12 -12 13184.0 647.259   6
   4  12 -14 38842.8 1205.17   3
   4  12 -14 36487.0 1092.18   6
   4 -12  14 38233.2 1127.46   1
  -4 -12 -14 37424.1 985.773   5
   4  12 -16 79393.7 1729.43   3
   4 -12  16 76866.4 1671.91   1
  -4 -12 -16 77878.6 1442.43   5
   4  12 -16 75148.4 1611.34   6
   4  12 -18 59706.0 1521.96   3
   4  12 -18 59729.5 1468.11   6
  -4 -12  18 62138.4 1451.04   1
  -4 -12 -18 60257.5 1323.44   5
   4 -12  18 59040.1 1546.89   1
  -4 -12  20 1711.95 298.430   1
   4  12 -20 1744.63 319.141   3
   4  12 -20 1405.35 304.639   6
  -4 -12 -20 970.061 255.118   5
   4 -12  20 860.523 247.659   1
   4 -12  22 339.017 220.163   1
   4  12 -22 89.1174 219.497   3
   4  12 -22 326.302 226.914   6
  -4 -12 -22 427.660 238.071   5
  -4 -12  22 393.483 207.514   1
   4  12 -24 4127.38 458.338   3
   4  12 -24 4601.41 466.529   6
  -4 -12  24 3391.97 444.951   1
  -4 -12 -24 4555.54 446.590   5
   4  12 -24 4209.30 526.596   2
   4 -12  24 3732.69 505.494   1
   4  12 -26 14570.3 814.782   3
   4  12 -26 14970.6 813.153   6
  -4 -12  26 13485.1 862.112   1
   4  12 -26 14402.3 920.387   2
  -4  12 -26 15784.6 735.205   3
   4 -12  26 13583.0 955.537   1
   4  12 -28 1987.45 392.245   2
  -4  12 -28 2848.20 371.189   3
  -4 -12  28 1681.28 369.700   1
   4  12 -28 2978.10 425.393   3
   4  12 -30 7820.86 611.906   3
  -4  12 -30 8287.83 564.119   3
   4 -12 -30 8033.24 829.218   7
   4  12 -32 45183.2 1426.56   3
  -4  12 -32 47002.1 1341.43   3
  -4  12 -34 45853.4 1340.76   3
   4 -12 -34 40173.6 1766.78   7
  -4  12 -36 6858.20 540.213   3
  -4  12 -38 5175.92 473.426   3
  -4  12 -40 18462.6 845.962   3
  -4 -12 -42 15305.7 981.165   7
  -4  12 -42 15780.8 744.157   3
   4 -14   0 7459.63 450.305   1
   4  14   0 7191.96 479.075   6
   4 -14  -2 8766.09 473.228   1
   4  14   2 8883.42 538.984   6
   4  14  -2 9233.74 548.161   6
   4 -14   2 8928.79 504.035   1
   4  14  -4 75592.5 1537.22   6
   4 -14  -4 79421.0 1415.58   1
   4 -14   4 78195.5 1467.21   1
   4 -14  -6 144908. 1914.87   1
   4  14  -6 141669. 2121.51   6
   4 -14   6 137515. 1997.23   1
  -4 -14  -6 141341. 1552.41   1
   4 -14   8 143472. 2093.51   1
   4  14  -8 143234. 2125.75   6
   4  14 -10 70626.8 1789.04   3
   4  14 -10 80030.5 1619.12   6
  -4 -14 -10 79099.7 1421.61   5
   4 -14  10 70547.9 1516.36   1
   4  14 -12 48493.3 1439.19   3
   4  14 -12 51731.5 1334.12   6
  -4 -14 -12 52415.7 1190.16   5
   4  14 -14 13350.0 695.196   6
  -4 -14  14 10791.3 611.441   1
  -4 -14 -14 13416.8 635.650   5
   4 -14  14 10012.6 622.080   1
   4  14 -14 13008.3 745.166   3
   4  14 -16 6389.74 541.790   3
   4 -14  16 5665.56 485.450   1
   4  14 -16 6631.32 507.783   6
  -4 -14  16 5672.70 465.523   1
  -4 -14 -16 7286.57 492.213   5
   4  14 -18 2746.73 374.510   3
   4  14 -18 2352.82 314.479   6
  -4 -14 -18 2896.51 368.629   5
  -4 -14  18 2125.55 313.483   1
   4 -14  20 904.110 240.670   1
  -4 -14  20 1360.32 263.927   1
   4  14 -20 1709.10 326.840   3
   4  14 -20 1548.58 300.517   6
   4  14 -22 32589.9 1182.84   3
   4  14 -22 31805.6 1169.78   6
  -4 -14  22 31357.9 1177.18   1
   4 -14  22 30120.7 1267.46   1
   4  14 -24 135797. 2399.59   6
  -4 -14  24 129988. 2462.96   1
   4  14 -24 138500. 2838.73   2
   4 -14  24 128473. 2767.06   1
   4  14 -24 138345. 2445.98   3
   4  14 -26 122108. 2319.69   3
   4  14 -26 119576. 2292.22   6
  -4 -14  26 105340. 2458.06   1
  -4  14 -26 121147. 1995.98   3
   4 -14  26 100704. 2608.66   1
   4  14 -26 108910. 2562.73   2
  -4  14 -28 42200.4 1206.98   3
   4  14 -28 44096.8 1404.67   3
   4  14 -30 11466.9 727.770   3
  -4  14 -30 11999.3 671.249   3
   4  14 -32-199.369 333.865   3
  -4  14 -32 128.129 219.977   3
  -4  14 -34 363.372 192.982   3
  -4  14 -36 11578.0 668.147   3
  -4  14 -38 28094.2 1028.58   3
  -4  14 -40 63708.8 1487.82   3
  -4 -16   0 5628.78 385.665   1
   4  16   0 5984.50 484.531   6
   4 -16   0 6191.02 449.995   1
   4 -16  -2 12377.7 616.731   1
  -4 -16   2 13755.5 602.686   1
  -4 -16  -2 13107.8 548.122   1
   4  16   2 12301.5 695.350   6
   4  16  -2 11742.9 672.378   6
   4 -16   2 13284.6 659.924   1
  -4 -16   4 46961.1 1130.11   1
   4  16   4 40516.9 1249.12   6
  -4 -16  -4 42766.7 949.866   1
   4  16  -4 41386.6 1229.25   6
   4 -16  -4 44867.8 1171.77   1
   4 -16   4 46115.2 1237.35   1
   4 -16  -6 227948. 2644.49   1
  -4 -16   6 228741. 2499.79   1
   4  16   6 192142. 2763.65   6
   4  16  -6 206167. 2723.67   6
   4 -16   6 206410. 2649.20   1
  -4 -16   8 234081. 2602.08   1
   4 -16   8 224732. 2821.53   1
   4  16 -10 173701. 2505.52   6
  -4 -16  10 173361. 2315.41   1
   4  16 -12 108708. 2026.89   6
   4 -16  12 101185. 1981.47   1
  -4 -16  12 107952. 1870.99   1
   4  16 -12 108321. 2319.33   3
   4  16 -14 40029.7 1241.66   6
  -4 -16  14 36536.6 1138.79   1
   4 -16  14 37566.3 1248.82   1
  -4 -16  16 6719.01 525.036   1
   4  16 -16 6607.86 564.139   3
   4 -16  16 6116.68 512.370   1
   4  16 -16 6132.46 519.427   6
   4  16 -18 5448.42 495.676   6
  -4 -16  18 6248.19 535.566   1
   4 -16  18 4616.18 478.726   1
   4  16 -18 5756.52 536.963   3
  -4 -16  20 21192.6 1010.82   1
   4 -16  20 22110.8 1077.20   1
   4  16 -20 23882.2 1008.00   6
   4  16 -20 24396.9 1047.97   3
   4  16 -22 65900.7 1718.17   3
   4  16 -22 64471.8 1677.37   6
  -4 -16  22 66965.6 1825.35   1
  -4  16 -22 63749.1 1434.77   3
   4 -16  22 62682.0 1896.98   1
   4  16 -24 146014. 2566.16   3
   4  16 -24 139209. 2478.97   6
  -4 -16  24 133706. 2744.93   1
  -4  16 -24 141332. 2166.16   3
   4 -16  24 128766. 2855.76   1
  -4  16 -26 163657. 2350.43   3
   4  16 -26 164704. 2718.38   3
   4  16 -26 164467. 2692.93   6
   4  16 -28 81772.1 1921.64   6
  -4  16 -28 86826.6 1767.06   3
   4  16 -28 83017.9 1927.74   3
  -4  16 -30 31074.9 1080.01   3
   4  16 -30 28596.2 1111.95   3
  -4  16 -32 16514.0 792.041   3
  -4  16 -34 11545.3 662.492   3
  -4  16 -36 6863.20 506.671   3
  -4  16 -38 50232.4 1311.77   3
  -4  16 -40 56963.9 1325.01   3
  -4 -16 -40 59715.2 1755.60   7
   4  18   0 484.273 246.449   6
  -4 -18   0 478.703 174.357   1
   4 -18   0 240.859 163.414   1
  -4 -18   2 1162.61 222.452   1
  -4 -18  -2 1377.39 245.693   1
   4 -18  -2 1041.97 218.279   1
   4  18   2 1231.07 295.295   6
   4  18  -2 1370.60 317.049   6
   4 -18   2 1413.21 266.262   1
   4  18   4 37550.6 1327.15   6
   4  18  -4 36053.7 1218.53   6
  -4 -18   4 37186.2 1088.15   1
   4 -18   4 36548.4 1203.32   1
   4 -18  -4 36980.3 1163.33   1
   4 -18   6 69760.7 1683.84   1
   4  18   6 70290.0 1838.01   6
  -4 -18   6 70573.7 1524.91   1
   4  18  -6 69796.2 1671.84   6
  -4 -18   8 145601. 2260.63   1
   4 -18   8 146728. 2461.95   1
   4  18 -10 120249. 2189.62   6
  -4 -18  10 121123. 2108.29   1
   4  18 -12 60106.2 1567.39   6
  -4 -18  12 61596.1 1546.34   1
   4 -18  14 2282.24 339.291   1
  -4 -18  14 2003.54 339.606   1
   4  18 -14 2318.35 381.668   3
   4  18 -14 2727.73 402.647   6
   4  18 -16 2850.05 424.618   3
   4 -18  16 2038.77 350.378   1
   4  18 -16 2873.03 391.562   6
  -4 -18  16 2688.18 375.899   1
  -4  18 -18 638.585 188.422   3
   4 -18  18 938.687 263.868   1
   4  18 -18 290.838 244.782   6
   4  18 -18 604.756 219.406   3
  -4 -18  18 746.239 259.515   1
   4  18 -20 14661.0 839.218   3
   4  18 -20 13645.2 777.509   6
  -4 -18  20 14851.5 909.238   1
  -4  18 -20 14122.3 688.411   3
   4 -18  20 14959.9 940.201   1
   4  18 -22 57484.4 1636.56   3
   4  18 -22 57353.4 1597.70   6
  -4  18 -22 58465.3 1398.13   3
   4  18 -24 43610.6 1398.80   6
  -4  18 -24 42943.9 1221.76   3
   4  18 -24 43364.6 1400.87   3
   4  18 -26 71757.8 1782.14   6
   4  18 -26 69012.0 1742.41   3
  -4  18 -26 72654.4 1609.05   3
   4  18 -28 56394.3 1593.61   6
  -4  18 -28 57602.1 1460.52   3
  -4  18 -30 20788.8 879.058   3
  -4  18 -32 8917.79 585.727   3
  -4  18 -34-336.701 206.909   3
  -4  18 -36 8024.89 540.697   3
  -4  18 -38 8965.51 535.314   3
   4 -20   0 17587.1 892.139   1
  -4 -20   0 15886.3 777.140   1
   4 -20  -2 2144.05 341.635   1
   4  20   2 2639.18 416.698   6
   4  20  -2 2880.99 436.363   6
  -4 -20   2 1797.78 314.297   1
   4 -20   2 2154.47 353.585   1
   4  20   4 2086.12 424.728   6
   4  20  -4 1747.01 361.797   6
   4 -20   4 2100.50 366.500   1
  -4 -20   4 1789.91 314.976   1
   4 -20   6 23727.1 1075.81   1
   4  20   6 23497.4 1160.74   6
   4  20  -6 23344.5 1043.62   6
  -4 -20   6 23794.9 993.092   1
   4  20  -8 35464.9 1252.32   6
  -4 -20   8 33683.9 1205.77   1
   4 -20   8 32634.4 1265.70   1
   4  20 -10 40341.8 1331.57   6
  -4 -20  10 37591.4 1305.51   1
   4 -20  10 38166.1 1395.20   1
  -4 -20  12 941.329 277.126   1
   4 -20  12 1486.13 333.438   1
   4  20 -12 1254.53 334.686   6
   4  20 -14 12607.1 755.095   6
  -4 -20  14 10795.6 762.998   1
  -4  20 -14 11796.8 610.718   3
   4 -20  14 12045.9 826.310   1
   4  20 -16 6698.51 557.118   6
  -4 -20  16 5949.17 573.744   1
  -4  20 -16 6384.54 472.898   3
   4 -20  16 6111.26 616.269   1
   4  20 -18 18305.0 910.383   6
  -4  20 -18 17617.2 772.780   3
   4  20 -20-177.499 269.139   6
  -4  20 -20 155.812 177.416   3
   4  20 -22 12142.4 748.333   6
  -4  20 -22 11509.5 648.026   3
  -4  20 -24 32600.0 1183.63   6
  -4  20 -24 33336.5 1102.13   3
   4  20 -24 33885.3 1239.97   6
   4  20 -26 10622.5 698.761   6
  -4  20 -26 10319.1 618.232   3
  -4  20 -28 5451.84 458.247   3
   4  20 -28 5509.59 502.508   6
  -4  20 -30 1934.37 290.245   3
  -4  20 -32 5679.90 460.777   3
  -4  20 -34 192.057 159.737   3
  -4  20 -36 1401.15 247.233   3
   4  22   0 26792.0 1215.07   6
   4 -22   0 19917.1 1041.63   1
   4 -22   2 23034.2 1113.54   1
   4  22   2 28006.3 1258.70   6
   4  22  -2 28786.8 1232.10   6
  -4 -22   2 22201.0 995.708   1
   4 -22   4 4872.76 541.034   1
   4  22   4 7383.16 691.016   6
   4  22  -4 7262.89 640.421   6
  -4 -22   4 5130.63 499.714   1
  -4 -22   6 399.853 187.523   1
   4  22   6 506.125 267.278   6
   4  22  -6 135.230 243.101   6
   4 -22   6 426.270 216.675   1
   4  22  -8 3659.42 446.250   6
   4 -22   8 3777.16 503.576   1
  -4 -22   8 3732.39 458.820   1
   4  22 -10 2776.82 404.129   6
   4 -22  10 2601.15 423.279   1
  -4 -22  10 2184.65 375.235   1
   4  22 -12 13721.3 793.225   6
  -4 -22  12 11852.8 811.287   1
   4 -22  12 12325.9 878.190   1
   4  22 -14 28364.9 1126.76   6
   4  22 -16 56514.7 1585.08   6
   4  22 -18 37223.5 1282.68   6
  -4  22 -18 34444.0 1099.78   3
   4  22 -20 13449.1 786.268   6
  -4  22 -20 11799.5 658.910   3
  -4  22 -22 181.826 196.753   6
   4  22 -22 118.075 199.485   6
  -4  22 -22-89.1625 182.668   3
   4  22 -24 913.617 259.185   6
  -4  22 -24 744.818 186.094   6
  -4  22 -24 1102.68 233.285   3
   4  22 -26 535.032 207.112   6
  -4  22 -26 258.051 156.064   3
   4  22 -28 1261.52 263.489   6
  -4  22 -28 1411.21 259.100   3
  -4  22 -30 17438.1 781.568   3
  -4  22 -32 11501.0 622.648   3
   4  24   0 48439.0 1641.52   6
   4  24   2 39985.5 1552.34   6
   4  24  -2 39260.1 1442.90   6
   4  24   4 37747.0 1560.85   6
   4  24  -4 36167.5 1352.87   6
   4  24  -6 5843.95 546.246   6
   4  24  -8 12067.4 764.460   6
   4  24 -10 10234.6 695.009   6
   4  24 -12 7241.66 587.469   6
   4  24 -14 57745.3 1607.33   6
   4  24 -16 120979. 2298.93   6
   4  24 -18 77975.5 1827.95   6
   4  24 -20 32204.6 1179.52   6
  -4  24 -20 31683.5 1148.42   6
   4  24 -22 11266.5 702.950   6
  -4  24 -22 12374.9 717.156   6
   4  24 -24 1440.54 279.702   6
  -4  24 -24 1132.42 238.308   6
  -4  24 -24 1458.04 244.074   3
   4  24 -26 589.311 210.050   6
  -4  24 -26 317.812 152.176   3
   4  24 -28 10484.0 608.121   6
  -4  24 -28 10333.7 589.212   3
   4  26   0 52437.8 1751.88   6
   4  26   2 50538.8 1785.53   6
   4  26  -2 48710.3 1648.30   6
   4  26   4 24561.0 1299.26   6
   4  26  -4 23407.6 1121.38   6
   4  26  -6 16390.2 932.192   6
   4  26  -8 1551.44 328.293   6
   4  26 -10 633.898 224.825   6
   4  26 -12 12271.4 768.639   6
   4  26 -14 40961.0 1332.12   6
   4  26 -16 61388.3 1610.24   6
   4  26 -18 66404.0 1645.79   6
  -4  26 -18 66022.5 1638.42   6
   4  26 -20 38406.2 1230.49   6
  -4  26 -20 38333.9 1235.75   6
   4  26 -22 8544.28 584.590   6
  -4  26 -22 9275.37 607.492   6
   4  26 -24 154.872 161.020   6
  -4  26 -24-204.347 180.905   6
   4  26 -26 685.458 186.335   6
   4  28   0 14610.7 914.622   6
   4  28   2 6278.35 637.111   6
   4  28  -2 5194.39 546.548   6
   4  28  -4-101.888 252.912   6
   4  28  -6 896.484 273.747   6
   4  28  -8 5814.23 557.183   6
   4  28 -10 5726.24 532.359   6
   4  28 -12 204.360 224.404   6
   4  28 -14 4705.34 458.932   6
  -4  28 -14 4409.54 447.067   6
   4  28 -16 11824.3 688.258   6
  -4  28 -16 11958.9 711.417   6
   4  28 -18 15250.3 749.553   6
  -4  28 -18 15485.5 772.121   6
  -4  28 -20 7518.84 520.984   6
   4  28 -20 6959.46 507.399   6
   4  28 -22-166.699 178.422   6
  -4  28 -22-64.4069 156.388   6
   4  30   0 446.340 248.725   6
   4  30   2 255.963 236.969   6
   4  30  -2 231.951 213.851   6
   4  30  -4 4847.36 500.854   6
   4  30  -6 17172.7 864.583   6
  -4  30  -6 18255.0 844.226   6
  -4  30  -8 23201.6 950.951   6
   4  30  -8 22338.9 955.868   6
   4  30 -10 12686.0 719.894   6
  -4  30 -10 13157.8 731.773   6
  -4  30 -12 6975.98 541.324   6
   4  30 -12 7378.83 543.627   6
   4  30 -14 305.531 176.297   6
  -4  30 -14-422.871 240.159   6
  -4  30 -16 400.913 155.391   6
   4  30 -16 999.083 223.653   6
   4  30 -18 97.2514 143.224   6
  -4  32   0 20.0948 178.728   6
  -4  32  -2 1027.09 240.802   6
  -4  32  -4 7872.24 531.254   6
  -4  32  -6 21400.5 856.756   6
  -4  32  -8 26697.8 935.822   6
   5   1  -1 28527.9 535.783   2
   5  -1  -1 28860.1 530.119   2
   5   1   1 27819.4 477.555   2
   5   1   3 250360. 1234.93   2
   5   1  -3 252225. 1700.16   2
   5  -1  -5 254772. 1795.68   2
   5   1  -5 248720. 1805.26   2
   5  -1  -7 231733. 1811.56   2
   5   1  -7 228460. 1828.42   2
   5   1  -9 424868. 2638.11   2
   5  -1  -9 423979. 2582.78   2
   5  -1 -11 517122. 2987.41   2
   5   1 -11 516419. 3001.13   2
   5  -1 -13 248938. 2170.56   2
   5   1 -13 248807. 2186.39   2
   5   1 -15 86652.4 1369.81   2
   5  -1 -15 89256.8 1375.95   2
   5   1 -17 5866.31 389.117   2
   5  -1 -17 5809.34 385.262   2
   5   1 -17 6484.61 788.069   7
   5   1 -19 12300.9 591.299   2
   5   1 -19 13994.9 1050.61   7
   5  -1 -19 13524.5 989.771   7
   5  -1 -19 11793.7 564.409   2
   5   1 -21 107600. 1799.45   2
   5  -1 -21 117769. 2808.49   7
   5   1 -21 114160. 2885.09   7
   5  -1 -21 109888. 1804.30   2
   5   1 -23 341515. 3381.16   2
  -5  -1 -23 340883. 3225.82   5
   5   1 -23 352824. 5066.92   7
   5  -1 -23 354059. 4952.99   7
  -5  -1 -25 339750. 3244.51   5
  -5   1 -25 351119. 3311.34   5
   5  -1 -25 338498. 4871.12   7
   5   1 -25 341669. 5106.94   7
  -5  -1 -27 198752. 2496.10   5
  -5   1 -27 198400. 2546.58   5
   5  -1 -27 197458. 3816.94   7
   5   1 -27 207388. 4052.04   7
  -5  -1 -29 28905.8 1000.19   5
  -5   1 -29 29944.5 1007.19   5
   5  -1 -29 27193.2 1527.99   7
   5   1 -29 29824.8 1626.85   7
  -5  -1 -31 3896.96 418.876   5
  -5   1 -31 3720.70 393.682   5
  -5   1 -31 4051.39 398.745   3
   5  -1 -31 3180.75 607.334   7
  -5   1 -33 73841.2 1648.04   3
  -5  -1 -33 73093.9 1611.60   5
  -5   1 -33 71457.1 1575.32   5
   5  -1 -33 68199.7 2427.05   7
  -5  -1 -35 31873.1 1099.11   5
  -5   1 -35 31230.4 1422.49   7
  -5   1 -37 28342.6 1369.61   7
  -5  -1 -37 29660.4 1404.84   7
  -5   1 -39 70336.6 2165.77   7
  -5  -1 -39 71231.4 2143.27   7
  -5  -1 -41 91405.0 2455.23   7
  -5   1 -41 91847.8 2499.25   7
  -5   1 -43 81935.1 2291.55   7
  -5  -1 -43 88609.5 2381.16   7
  -5  -1 -45 49783.3 1731.83   7
   5  -3   5 957.440 164.932   1
   5  -3   7 2267.29 215.838   1
   5   3  -7 2321.65 212.370   2
   5   3  -9 198188. 1863.94   2
   5  -3   9 198372. 1896.43   1
   5  -3  11 58371.8 1057.13   1
   5   3 -11 61579.2 1066.06   2
   5   3 -13 74573.6 1263.30   2
   5  -3  13 71572.7 1215.96   1
   5   3 -15 41467.9 968.444   2
   5  -3  15 40573.8 967.090   1
   5   3 -17 51127.0 1190.43   3
  -5   3 -17 52629.0 1167.07   4
   5   3 -17 51205.8 1156.73   2
   5  -3  17 48549.2 1132.34   1
   5   3 -19 3593.15 356.447   3
   5  -3  19 2892.17 310.387   1
   5  -3 -19 3258.27 575.432   7
   5   3 -19 3249.26 316.364   2
   5   3 -21 17793.4 751.264   2
   5   3 -21 17068.1 760.565   3
   5  -3  21 19381.0 829.431   1
  -5  -3 -21 17646.2 741.615   5
   5  -3 -21 17383.0 1141.02   7
  -5  -3 -23 54004.0 1278.76   5
   5  -3 -23 56308.1 1962.37   7
   5   3 -23 53884.6 1374.78   2
   5   3 -25 82625.6 1788.26   2
   5  -3 -25 83579.0 2407.23   7
  -5  -3 -25 81845.5 1588.04   5
  -5   3 -25 84795.8 1667.75   5
   5   3 -27 28690.9 1119.08   2
  -5  -3 -27 29521.6 983.752   5
  -5   3 -27 30712.5 1018.15   5
   5  -3 -27 28987.8 1535.62   7
   5   3 -29 8490.74 671.267   2
  -5  -3 -29 8572.48 572.144   5
  -5   3 -29 8871.56 575.166   5
   5  -3 -29 8429.49 911.999   7
  -5  -3 -31 14846.7 768.180   5
  -5   3 -31 15108.1 766.716   3
   5  -3 -31 13766.3 1132.59   7
  -5   3 -31 15972.1 1009.81   7
  -5   3 -33 27117.0 1013.28   3
  -5  -3 -33 23907.3 981.872   5
   5  -3 -33 22824.6 1447.86   7
  -5   3 -33 25670.0 1271.90   7
  -5   3 -35 914.624 257.376   3
   5  -3 -35 35.3633 577.468   7
  -5   3 -35 965.716 418.809   7
  -5   3 -37 6388.21 714.394   7
  -5   3 -37 5517.74 482.696   3
  -5   3 -39 15841.9 1078.38   7
  -5  -3 -39 17893.4 1110.32   7
  -5  -3 -41 43286.6 1679.56   7
  -5   3 -41 37144.4 1585.57   7
  -5   3 -43 19935.7 1177.75   7
  -5  -3 -43 25683.8 1300.19   7
  -5  -3 -45 12619.1 909.803   7
   5  -5   1 14583.5 490.893   1
   5  -5   3 82663.3 1184.20   1
   5  -5   5 6011.20 337.965   1
   5  -5   7 18135.0 594.787   1
   5  -5   9 131.666 95.5349   1
   5  -5  11 5545.70 362.083   1
   5  -5  13 184202. 2045.97   1
   5   5 -13 192905. 2098.75   2
   5   5 -15 134540. 1925.98   3
   5  -5  15 136354. 1862.84   1
  -5   5 -15 134081. 1772.58   4
   5  -5  17 191719. 2362.38   1
   5   5 -17 193455. 2306.68   2
  -5  -5 -19 71049.9 1398.79   5
   5   5 -19 58887.1 1325.12   6
   5  -5  19 68505.0 1530.12   1
   5   5 -19 64294.4 1452.18   3
   5  -5 -19 62240.4 1959.40   7
   5   5 -19 67402.6 1433.38   2
   5   5 -21 14785.1 734.189   3
   5   5 -21 12495.7 635.539   6
   5  -5  21 15397.5 798.897   1
  -5  -5 -21 14697.1 677.096   5
   5  -5 -21 14855.6 997.283   7
   5   5 -21 13880.4 701.657   2
   5   5 -23 235.057 169.037   2
   5   5 -23 260.842 180.385   3
  -5  -5 -23 596.367 210.548   5
   5  -5  23 373.166 216.798   1
   5  -5 -23 367.408 392.628   7
   5   5 -25-266.297 202.649   2
   5   5 -25 98.6058 184.996   3
  -5  -5 -25 167.055 190.217   5
   5  -5 -25 308.334 404.947   7
   5   5 -27 4.32017 183.548   2
  -5  -5 -27-124.003 215.494   5
   5  -5 -27 540.674 438.812   7
  -5   5 -27 544.425 409.926   7
  -5  -5 -29-89.4650 247.732   5
   5   5 -29 146.793 171.964   2
   5  -5 -29 130.793 449.988   7
  -5   5 -29 820.636 392.833   7
   5   5 -31 45831.5 1615.20   2
  -5  -5 -31 52830.0 1378.74   5
  -5   5 -31 55697.9 1416.72   3
   5  -5 -31 46159.9 1952.48   7
  -5   5 -31 54469.9 1828.03   7
  -5  -5 -33 35557.1 1154.78   5
  -5   5 -33 35837.9 1176.81   3
  -5   5 -33 35662.4 1529.85   7
   5  -5 -35 67740.8 2378.68   7
  -5   5 -35 68671.1 2186.29   7
  -5   5 -37 5114.68 474.509   3
  -5   5 -37 4039.31 594.749   7
  -5   5 -39 163.293 179.764   3
  -5   5 -39 57.3282 364.904   7
  -5   5 -41 110.945 177.142   3
  -5  -5 -41 798.632 406.601   7
  -5  -5 -43 3041.07 550.613   7
  -5  -5 -45-119.453 311.767   7
   5  -7   1 122794. 1454.97   1
   5  -7  -1 124367. 1474.85   1
   5  -7   3 169972. 1768.65   1
   5  -7   5 2600.63 238.048   1
   5  -7   7 988.895 179.653   1
   5  -7   9 977.223 188.690   1
   5  -7  11 209587. 2223.40   1
   5   7 -13 166345. 2205.25   3
  -5   7 -13 164591. 1883.11   4
   5  -7  15 270433. 2800.35   1
   5   7 -15 263455. 2773.58   6
  -5  -7 -15 275181. 2608.39   5
  -5   7 -15 260297. 2548.07   4
   5   7 -15 277104. 2916.15   3
   5   7 -17 207233. 2602.06   3
   5   7 -17 208637. 2543.52   6
  -5  -7 -17 215235. 2335.43   5
   5   7 -17 224353. 2618.25   2
   5  -7  17 218737. 2672.36   1
   5   7 -19 185102. 2520.87   3
   5  -7  19 199158. 2708.24   1
   5   7 -19 185336. 2464.08   6
  -5  -7 -19 201506. 2304.16   5
   5   7 -19 194155. 2523.70   2
   5   7 -21 106048. 1987.68   3
   5  -7  21 120913. 2330.26   1
  -5  -7 -21 117056. 1797.84   5
   5   7 -21 103632. 1877.41   6
   5  -7 -21 99746.0 2479.18   7
   5   7 -21 114535. 2086.93   2
   5   7 -23 30656.7 1107.78   3
   5  -7  23 36812.9 1381.69   1
  -5  -7 -23 33073.8 990.042   5
   5   7 -23 31953.9 1144.81   2
   5  -7 -23 29717.9 1416.08   7
   5   7 -23 27270.0 996.462   6
   5   7 -25 18619.0 893.206   3
  -5  -7  25 16818.8 907.297   1
  -5  -7 -25 20651.8 809.091   5
   5  -7 -25 18226.3 1146.57   7
   5   7 -25 18152.2 908.977   2
   5   7 -27 4531.84 497.332   2
  -5  -7 -27 5048.16 436.544   5
   5   7 -27 4735.84 493.382   3
   5  -7 -27 5190.04 744.171   7
   5   7 -29 33537.2 1354.08   2
  -5  -7 -29 34543.9 1128.28   5
   5  -7 -29 31859.6 1583.31   7
  -5  -7 -31 68550.2 1587.91   5
   5   7 -31 59579.4 1895.91   2
  -5   7 -31 69030.2 1599.70   3
   5  -7 -31 62889.3 2249.34   7
  -5   7 -33 141837. 2320.09   3
   5  -7 -33 121405. 3160.13   7
  -5   7 -35 94217.1 1933.19   3
   5  -7 -35 81917.9 2599.15   7
  -5   7 -37 45791.4 1362.64   3
   5  -7 -37 40610.4 1870.33   7
  -5   7 -39 11984.3 696.690   3
  -5   7 -41 1410.87 265.082   3
  -5  -7 -41 1612.31 468.464   7
  -5   7 -43 2190.90 299.639   3
  -5  -7 -43 2639.17 533.100   7
   5  -9  -1 292447. 2365.67   1
   5  -9   1 288870. 2427.85   1
   5  -9   3 12023.0 502.164   1
   5  -9  -3 12515.4 500.685   1
   5  -9   5 51294.6 1029.95   1
   5  -9   7 768.618 175.767   1
   5  -9   9 56529.5 1182.19   1
   5   9 -11 155014. 2228.09   3
   5   9 -11 150186. 2042.90   6
  -5  -9 -11 147301. 1840.52   5
   5  -9  11 154684. 2050.15   1
  -5   9 -11 146717. 1805.76   4
   5   9 -13 294343. 3151.74   3
   5   9 -13 292913. 2938.56   6
  -5  -9 -13 290540. 2639.20   5
  -5   9 -13 289705. 2652.82   4
   5  -9  13 285944. 2936.01   1
   5   9 -15 160538. 2371.73   3
  -5  -9 -15 159450. 1989.22   5
   5   9 -15 164128. 2278.43   6
   5  -9  15 162819. 2324.50   1
   5  -9  17 265773. 3139.92   1
   5   9 -17 268520. 2984.07   6
  -5  -9 -17 261003. 2579.96   5
   5  -9  19 274765. 3387.45   1
   5   9 -19 274090. 3079.43   6
   5   9 -19 281172. 3251.46   2
   5  -9  21 97538.5 2143.78   1
   5   9 -21 95733.6 1879.54   6
  -5  -9 -21 94496.0 1623.65   5
   5   9 -21 89615.6 1889.19   3
   5   9 -21 95779.2 1984.17   2
   5   9 -23 58831.5 1591.87   3
   5   9 -23 59693.3 1507.74   6
  -5  -9  23 60674.9 1565.49   1
  -5  -9 -23 63894.0 1409.70   5
   5   9 -23 61593.1 1687.42   2
   5   9 -25 18858.2 922.618   3
   5   9 -25 20386.6 997.203   2
  -5  -9  25 18596.0 941.977   1
   5  -9  25 20510.1 1147.21   1
  -5  -9 -25 20051.8 811.645   5
   5  -9 -25 17558.5 1134.66   7
   5   9 -25 18184.2 838.528   6
  -5  -9  27 14509.6 905.131   1
  -5  -9 -27 18465.8 811.167   5
   5   9 -27 17308.9 970.500   2
   5  -9 -27 15900.7 1114.48   7
   5   9 -27 16876.0 886.838   3
   5   9 -29 24167.6 1185.29   2
  -5  -9 -29 27449.0 1008.14   5
   5  -9 -29 23166.3 1376.91   7
  -5   9 -31 87507.9 1805.94   3
   5  -9 -31 81668.0 2500.50   7
  -5   9 -33 148085. 2392.56   3
   5  -9 -33 134496. 3306.38   7
  -5   9 -35 126790. 2260.07   3
   5  -9 -35 114917. 3044.06   7
  -5   9 -37 55805.7 1487.85   3
   5  -9 -37 49385.1 2020.12   7
  -5   9 -39 10185.4 644.439   3
  -5   9 -41 3.24298 197.652   3
  -5  -9 -41 99.2988 338.654   7
  -5  -9 -43 3617.50 529.769   7
  -5   9 -43 2819.60 321.626   3
   5 -11   1 185918. 2041.76   1
   5 -11  -1 187951. 2075.75   1
   5 -11   3 54499.0 1133.66   1
   5 -11  -3 59370.2 1167.91   1
   5 -11   5 8126.66 462.875   1
   5  11  -5 8570.46 489.477   6
   5  11  -7 8982.40 504.733   6
   5 -11   7 9442.49 513.618   1
   5  11  -9 1854.17 245.691   6
   5 -11   9 1554.53 252.038   1
  -5 -11  -9 1462.72 221.961   5
  -5  11  -9 1863.17 226.608   4
   5  11 -11 16770.7 804.102   3
   5  11 -11 16018.5 711.201   6
   5 -11  11 17139.1 742.708   1
  -5 -11 -11 15388.7 613.023   5
  -5  11 -11 15644.4 645.132   4
   5  11 -13 83784.6 1808.32   3
   5 -11  13 80271.3 1665.84   1
  -5 -11 -13 80551.2 1399.03   5
   5  11 -13 79888.0 1596.29   6
   5  11 -15 133608. 2293.30   3
   5  11 -15 132059. 2126.26   6
  -5 -11 -15 129616. 1818.24   5
   5 -11  15 131719. 2228.66   1
   5  11 -17 113733. 2148.37   3
   5  11 -17 114555. 2035.50   6
  -5 -11 -17 112145. 1739.73   5
   5 -11  17 116107. 2175.82   1
   5  11 -19 115391. 2189.25   3
   5  11 -19 111603. 2033.88   6
  -5 -11 -19 115034. 1817.89   5
   5 -11  19 116180. 2293.26   1
   5 -11  21 62177.1 1777.26   1
   5  11 -21 62545.8 1654.81   3
  -5 -11  21 62388.4 1561.97   1
  -5 -11 -21 63828.1 1396.26   5
   5  11 -21 63835.4 1748.48   2
   5  11 -21 61886.5 1549.23   6
   5  11 -23 13467.8 788.320   3
   5 -11  23 13940.9 900.676   1
   5  11 -23 13725.9 769.292   6
  -5 -11  23 12838.8 751.933   1
  -5 -11 -23 13271.7 677.724   5
   5  11 -23 12445.4 794.374   2
   5 -11  25 1440.67 355.174   1
   5  11 -25 761.693 237.742   6
   5  11 -25 1828.58 387.182   2
   5  11 -25 1005.41 282.927   3
  -5 -11 -25 915.053 269.419   5
  -5 -11  25 1186.57 281.231   1
   5  11 -27 71.4363 224.766   3
  -5 -11  27 255.377 208.097   1
  -5 -11 -27 120.408 224.847   5
   5  11 -27 186.862 228.691   2
  -5  11 -29 7664.92 550.509   3
  -5  11 -31 39866.7 1210.88   3
  -5  11 -33 74059.3 1693.38   3
  -5  11 -35 52189.4 1439.72   3
  -5  11 -37 26148.6 1001.50   3
  -5  11 -39 89.8041 173.694   3
  -5  11 -41 9357.40 593.739   3
  -5 -11 -41 9009.73 765.574   7
  -5 -11 -43 1328.56 377.782   7
   5  13   1 6372.07 451.265   6
   5  13  -1 6706.94 453.965   6
   5 -13   1 7378.46 455.248   1
   5  13   3 1231.93 243.308   6
   5 -13  -3 723.557 185.751   1
   5 -13   3 845.319 179.151   1
   5 -13   5 57758.2 1303.37   1
   5  13   5 52294.9 1261.18   6
   5  13  -5 60084.5 1351.50   6
  -5  13  -5 50296.9 1086.79   4
   5 -13  -5 57962.0 1214.00   1
   5 -13   7 166000. 2259.03   1
   5  13  -7 167925. 2300.57   6
  -5  13  -7 161069. 2022.12   4
   5  13  -9 35738.4 1084.28   6
  -5 -13  -9 34184.2 919.440   5
   5  13 -11 48405.3 1282.72   6
  -5 -13 -11 49486.3 1132.77   5
   5  13 -13 916.170 260.753   3
   5  13 -13 1482.64 278.221   6
   5 -13  13 1249.51 263.790   1
  -5 -13 -13 1766.15 271.895   5
   5  13 -15 3799.70 382.383   6
  -5 -13 -15 3805.71 369.932   5
   5  13 -15 4287.98 450.605   3
   5 -13  15 4427.02 460.290   1
   5  13 -17 1585.69 285.796   3
   5  13 -17 1528.14 329.247   6
   5 -13  17 1617.18 330.860   1
  -5 -13 -17 1380.62 278.105   5
   5  13 -19 446.851 229.298   3
   5  13 -19 687.721 268.701   6
   5 -13  19 317.463 231.609   1
  -5 -13 -19 1029.21 274.231   5
  -5 -13  19 905.269 269.742   1
   5  13 -21 1843.10 333.270   3
   5  13 -21 1626.07 322.623   6
   5 -13  21 1917.86 365.119   1
  -5 -13 -21 1938.94 317.090   5
  -5 -13  21 1814.75 333.414   1
   5 -13  23 7355.98 684.393   1
   5  13 -23 7216.06 574.426   6
  -5 -13  23 6420.47 590.834   1
  -5 -13 -23 8342.59 586.021   5
   5  13 -23 6834.89 577.078   3
   5  13 -23 8085.98 704.038   2
   5  13 -25 72864.1 1834.13   3
   5 -13  25 65056.7 2102.99   1
  -5 -13  25 64866.9 1841.45   1
  -5 -13 -25 73566.4 1610.04   5
   5  13 -25 69539.0 1762.55   6
   5  13 -25 70400.1 2044.27   2
   5  13 -27 56789.1 1609.72   3
   5  13 -27 55765.9 1561.14   6
   5 -13  27 46654.1 1915.58   1
  -5 -13  27 45508.1 1668.02   1
  -5  13 -27 59111.1 1436.53   3
  -5  13 -29 12727.0 703.752   3
  -5  13 -31 1813.05 305.737   3
  -5  13 -33 577.851 217.593   3
  -5  13 -35 7367.99 549.279   3
  -5  13 -37 2911.24 357.088   3
  -5  13 -39 36416.7 1126.16   3
  -5  13 -41 41961.2 1183.08   3
  -5 -13 -41 43792.5 1523.50   7
   5  15  -1 14523.4 717.433   6
   5  15   1 14288.4 711.528   6
   5 -15   1 13882.7 671.904   1
   5 -15  -1 14689.6 690.577   1
   5 -15  -3 54122.7 1299.96   1
   5 -15   3 51642.9 1282.70   1
   5  15  -3 50684.0 1342.15   6
   5  15   3 51296.3 1350.96   6
   5 -15   5 126201. 2071.30   1
   5  15  -5 118139. 2028.56   6
   5  15   5 117079. 2051.31   6
   5 -15  -5 129063. 1991.11   1
   5 -15   7 198081. 2650.22   1
   5  15  -7 199495. 2641.46   6
   5  15  -9 268179. 3088.12   6
  -5 -15  -9 262918. 2630.43   5
   5 -15   9 259794. 3118.77   1
   5  15 -11 105964. 1973.70   6
  -5 -15 -11 107904. 1730.20   5
   5  15 -13 90766.4 1862.31   6
  -5 -15 -13 92477.6 1633.80   5
   5  15 -15 16848.5 817.202   6
  -5 -15  15 15089.6 789.021   1
  -5 -15 -15 16641.2 751.902   5
   5 -15  15 16128.5 876.947   1
   5  15 -17 11613.0 745.010   3
   5  15 -17 12353.3 725.124   6
  -5 -15  17 10616.7 681.044   1
  -5 -15 -17 12183.9 668.769   5
   5 -15  17 11421.8 761.258   1
   5  15 -19 23790.8 1055.57   3
   5  15 -19 24648.8 1037.81   6
  -5 -15  19 22566.0 981.016   1
  -5 -15 -19 25145.7 926.063   5
   5 -15  19 21829.0 1075.15   1
   5 -15  21 54718.6 1759.13   1
   5  15 -21 56624.5 1581.02   6
  -5 -15  21 53776.0 1621.01   1
   5  15 -21 56623.9 1629.03   3
   5  15 -23 74939.5 1862.32   3
   5 -15  23 69673.9 2075.72   1
   5  15 -23 75027.9 1831.54   6
  -5 -15  23 70177.7 1909.53   1
   5  15 -23 78540.5 2215.50   2
  -5  15 -25 157685. 2297.57   3
   5  15 -25 151398. 2598.39   6
   5  15 -27 148999. 2568.84   6
  -5  15 -27 151154. 2291.12   3
  -5  15 -29 44192.5 1264.52   3
  -5  15 -31 41952.2 1240.46   3
  -5  15 -33-7.79384 190.760   3
  -5  15 -35 5792.10 470.095   3
  -5  15 -37 38217.9 1137.68   3
  -5  15 -39 63556.4 1437.51   3
  -5 -17   1 27057.0 910.021   1
  -5 -17  -1 27202.2 885.347   1
   5  17   1 25760.3 1037.42   6
   5  17  -1 25381.8 1023.40   6
   5 -17   1 26174.7 994.488   1
   5 -17  -1 26988.1 1019.56   1
   5 -17  -3 22993.1 915.909   1
   5 -17   3 22200.0 927.207   1
  -5 -17   3 24061.9 857.202   1
   5  17   3 23036.7 999.846   6
  -5 -17  -3 21847.4 757.696   1
   5  17  -3 20440.1 924.670   6
   5 -17   5 67537.4 1633.82   1
  -5 -17   5 73027.7 1519.38   1
   5  17   5 70244.3 1749.97   6
   5  17  -5 64925.3 1607.46   6
   5 -17  -5 70812.7 1607.83   1
   5  17  -7 142451. 2371.73   6
   5 -17   7 139847. 2403.47   1
  -5 -17   7 147021. 2213.69   1
  -5 -17   9 161549. 2355.26   1
   5  17  -9 161059. 2531.58   6
   5  17 -11 165939. 2575.62   6
  -5 -17  11 159665. 2435.46   1
   5 -17  11 157078. 2651.79   1
   5 -17  13 18417.0 938.101   1
   5  17 -13 20011.9 917.944   6
  -5 -17  13 19555.5 880.078   1
   5  17 -15 6539.07 543.880   6
  -5 -17  15 6381.55 534.292   1
   5 -17  15 6341.38 597.611   1
   5  17 -17 8089.17 618.139   6
  -5 -17  17 7549.94 602.122   1
   5 -17  17 7866.62 671.024   1
   5 -17  19 11180.0 808.239   1
   5  17 -19 12118.8 753.708   6
  -5 -17  19 11881.0 781.949   1
   5 -17  21 57184.8 1855.98   1
   5  17 -21 61201.2 1650.65   6
  -5 -17  21 59455.3 1716.85   1
   5  17 -23 121229. 2317.19   6
  -5  17 -23 122492. 2018.73   3
   5  17 -25 83336.1 1956.01   6
  -5  17 -25 82639.5 1689.43   3
   5  17 -27 63302.6 1692.05   6
  -5  17 -27 61729.8 1476.36   3
  -5  17 -29 94921.2 1843.88   3
  -5  17 -31 5106.38 453.681   3
  -5  17 -33 2990.90 347.588   3
  -5  17 -35 8408.66 544.628   3
  -5  17 -37 16367.8 729.231   3
  -5 -19  -1 319.062 167.738   1
   5 -19   1 457.287 209.697   1
   5  19   1 173.363 232.127   6
   5  19  -1 315.324 228.439   6
   5 -19  -1 448.589 182.805   1
  -5 -19   1 604.751 214.707   1
   5 -19  -3 3255.71 414.568   1
   5  19   3 3822.64 492.717   6
   5 -19   3 3265.11 416.471   1
  -5 -19   3 3529.29 383.501   1
   5  19  -3 3134.55 418.767   6
   5  19   5 21146.5 1062.84   6
   5  19  -5 19060.0 941.977   6
  -5 -19   5 18681.5 864.719   1
   5 -19   5 19304.4 953.473   1
   5  19  -7 43766.9 1398.09   6
  -5 -19   7 43911.0 1313.99   1
   5 -19   7 43064.5 1428.44   1
   5  19  -9 73799.0 1792.80   6
  -5 -19   9 70056.7 1694.15   1
   5 -19   9 70754.0 1865.59   1
   5  19 -11 16099.0 850.395   6
  -5 -19  11 16298.3 843.761   1
   5 -19  11 15033.4 883.278   1
  -5 -19  13 2104.61 349.560   1
   5  19 -13 1965.66 343.829   6
   5 -19  13 2330.21 398.101   1
  -5 -19  15 154.941 172.771   1
   5  19 -15 253.726 256.500   6
   5 -19  15 400.765 272.370   1
   5 -19  17 8782.57 735.015   1
  -5 -19  17 8883.37 672.567   1
   5  19 -19 2526.19 402.533   6
  -5  19 -19 2457.65 327.369   3
   5  19 -21 18853.2 934.060   6
  -5  19 -21 17244.6 763.491   3
   5  19 -23 53834.4 1552.05   6
  -5  19 -23 52136.0 1339.87   3
   5  19 -25 41084.3 1372.51   6
  -5  19 -25 41387.2 1214.13   3
   5  19 -27 36503.1 1272.39   6
  -5  19 -27 37102.7 1150.79   3
   5  19 -29 1601.58 274.674   6
  -5  19 -29 1834.25 291.169   3
  -5  19 -31-100.618 165.242   3
  -5  19 -33 204.832 150.556   3
  -5  19 -35 22.1741 138.106   3
   5 -21  -1 14816.8 890.529   1
   5  21   1 19048.0 1036.67   6
   5  21  -1 18364.7 997.664   6
  -5 -21   1 13310.0 760.027   1
   5 -21   1 16202.8 935.333   1
   5  21   3 3706.33 482.054   6
   5  21  -3 3490.92 447.814   6
  -5 -21   3 2383.10 363.837   1
   5 -21   3 3161.81 450.703   1
  -5 -21   5 281.093 197.615   1
   5 -21   5 48.7120 209.344   1
   5  21   5 5.61488 267.620   6
   5  21  -5 315.518 243.183   6
   5 -21   7 7467.92 666.377   1
   5  21  -7 8313.72 668.906   6
  -5 -21   7 7577.48 583.447   1
  -5 -21   9 1343.68 319.301   1
   5  21  -9 1563.61 309.092   6
   5 -21   9 1605.31 335.008   1
   5  21 -11 1310.37 289.172   6
  -5 -21  11 899.857 277.129   1
   5 -21  11 1271.36 316.207   1
  -5 -21  13 35.2643 195.792   1
   5  21 -13-403.754 310.558   6
   5 -21  13 137.624 187.600   1
   5  21 -15 32639.5 1213.65   6
  -5  21 -15 30872.8 1004.83   3
   5  21 -17 42479.9 1388.91   6
  -5  21 -17 38753.6 1140.16   3
   5  21 -19 23233.0 1037.01   6
  -5  21 -19 20887.5 852.476   3
   5  21 -21 383.685 254.227   6
  -5  21 -21 372.108 186.471   3
   5  21 -23 6026.48 536.763   6
  -5  21 -23 6097.59 482.801   3
   5  21 -25 17947.7 896.497   6
  -5  21 -25 17202.0 788.119   3
   5  21 -27 181.855 178.249   6
  -5  21 -27 160.610 159.179   3
  -5  21 -29 5859.64 463.783   3
   5  21 -29 4876.00 440.253   6
  -5  21 -31 4353.10 390.138   3
  -5  21 -33 13988.5 661.220   3
   5  23   1 40274.3 1555.03   6
   5  23  -1 40070.8 1502.18   6
   5  23   3 43603.1 1656.44   6
   5  23  -3 42501.7 1517.36   6
   5  23   5 14147.7 976.097   6
   5  23  -5 13688.8 842.949   6
   5  23  -7 9147.30 679.707   6
   5  23  -9 2947.47 382.736   6
   5  23 -11 223.884 320.974   6
   5  23 -13 41445.0 1375.26   6
   5  23 -15 80922.5 1909.53   6
   5  23 -17 98028.0 2071.17   6
   5  23 -19 59752.7 1611.73   6
  -5  23 -19 52608.2 1359.78   3
  -5  23 -21 18005.2 806.732   3
   5  23 -21 19671.3 936.073   6
   5  23 -23 1259.39 303.510   6
  -5  23 -23 1124.00 254.098   6
  -5  23 -23 896.748 229.921   3
   5  23 -25 768.423 231.152   6
  -5  23 -25 499.853 170.342   3
   5  23 -27 4069.38 408.556   6
  -5  23 -27 3976.44 373.432   3
   5  23 -29 7717.22 515.972   6
  -5  23 -29 9502.71 557.610   3
  -5  23 -31 29874.2 940.297   3
   5  25   1 63547.3 1975.35   6
   5  25  -1 61857.0 1882.20   6
   5  25   3 50968.6 1853.55   6
   5  25  -3 47307.7 1606.04   6
   5  25  -5 43718.7 1514.44   6
   5  25  -7 21667.2 1040.40   6
   5  25  -9-88.8682 229.814   6
   5  25 -11 9972.90 705.270   6
   5  25 -13 31823.5 1205.20   6
   5  25 -15 95961.5 2039.61   6
   5  25 -17 101769. 2057.50   6
   5  25 -19 56891.4 1525.85   6
   5  25 -21 28115.0 1052.25   6
  -5  25 -21 28822.4 1064.68   6
  -5  25 -23 9439.52 596.133   6
   5  25 -23 9423.57 611.444   6
   5  25 -25 2844.78 343.914   6
   5  25 -27 2931.13 325.803   6
   5  27   1 27209.7 1301.65   6
   5  27  -1 26066.0 1226.11   6
   5  27  -3 11647.1 805.410   6
   5  27   3 12453.9 911.281   6
   5  27  -5 3016.06 418.509   6
   5  27  -7 881.745 269.812   6
   5  27  -9-544.542 291.852   6
   5  27 -11-348.353 275.698   6
   5  27 -13 8109.39 599.772   6
   5  27 -15 25224.1 1007.45   6
   5  27 -17 30946.2 1089.15   6
  -5  27 -17 30667.3 1086.37   6
   5  27 -19 22691.2 921.614   6
  -5  27 -19 23834.1 939.216   6
   5  27 -21 6143.56 482.764   6
  -5  27 -21 6117.14 481.714   6
   5  27 -23 528.868 189.295   6
   5  29   1 1014.34 308.950   6
   5  29  -1 1125.30 299.074   6
   5  29  -3 88.8680 215.573   6
   5  29  -5 10613.3 715.256   6
   5  29  -7 13974.5 787.965   6
   5  29  -9 14393.4 781.250   6
   5  29 -11 3935.90 423.118   6
   5  29 -13 253.477 181.547   6
  -5  29 -13 215.774 184.652   6
   5  29 -15-71.2596 175.565   6
  -5  29 -15-57.0234 183.497   6
   5  29 -17 1812.87 285.634   6
  -5  29 -17 1260.39 253.060   6
   5  29 -19 719.509 199.942   6
   5  31  -1 94.1534 172.694   6
  -5  31   1 38.1534 219.794   6
  -5  31  -1-180.786 213.399   6
   5  31  -3 4232.18 446.852   6
  -5  31   3 3368.54 353.233   6
  -5  31  -3 3876.96 396.972   6
   5  31  -5 13694.7 731.820   6
  -5  31  -5 14762.1 719.333   6
   5  31  -7 26095.7 979.915   6
  -5  31  -7 29209.8 1000.14   6
  -5  31  -9 20491.1 857.120   6
   5  31  -9 20054.4 852.914   6
   5  31 -11 7308.39 509.873   6
  -5  31 -11 7964.01 523.043   6
   6   0   0 2970.61 188.947   2
   6   0  -2 1547.56 157.686   2
   6   0  -4 78865.1 1071.42   2
   6   0  -6 126723. 1432.02   2
   6   0  -8 587241. 3216.10   2
   6   0 -10 469305. 3026.50   2
   6   0 -12 478026. 3178.11   2
   6   0 -14 152416. 1884.87   2
   6   0 -16 19172.5 707.265   2
  -6   0 -16 15814.4 676.138   4
   6   0 -18 7645.18 476.531   2
  -6   0 -18 6743.00 473.924   4
   6   0 -18 6417.53 431.118   6
   6   0 -20 17071.3 741.429   2
   6   0 -20 13598.6 650.813   6
   6   0 -22 133272. 2168.50   2
  -6   0 -26 289069. 3130.30   5
  -6   0 -28 5535.95 506.492   5
  -6   0 -30 8146.02 593.555   5
  -6   0 -32 81709.3 1731.28   5
  -6   0 -34 2947.86 376.780   5
  -6   0 -36 12618.6 704.711   5
  -6   0 -36 13519.1 944.448   7
  -6   0 -38 1864.70 460.586   7
  -6   0 -40 42419.2 1687.39   7
  -6   0 -42 50448.6 1783.21   7
   6   2   0 2900.45 199.796   2
   6   2  -2 2376.37 189.041   2
   6   2   2 2227.99 156.935   2
   6   2   4 19532.4 384.341   2
   6   2  -4 19304.0 542.282   2
   6   2  -6 70427.2 1089.11   2
   6  -2  -8 141359. 1583.62   2
   6   2  -8 139103. 1597.87   2
   6  -2 -10 356673. 2625.99   2
   6   2 -10 348264. 2665.66   2
   6  -2 -12 259484. 2335.61   2
   6   2 -12 251972. 2325.72   2
   6  -2 -14 4260.02 331.740   2
   6   2 -14 4395.56 345.207   2
   6   2 -16 2935.56 304.022   6
   6   2 -16 3434.58 320.686   2
  -6   2 -16 3416.02 318.769   4
   6   2 -18 21564.7 798.123   2
   6  -2 -18 22526.4 1380.63   7
  -6  -2 -18 17879.1 728.832   4
   6   2 -18 18033.4 735.731   6
  -6   2 -18 22868.2 814.639   4
   6  -2 -18 16699.2 680.259   6
   6   2 -20 7235.83 487.961   6
   6   2 -20 9304.08 562.853   2
   6  -2 -20 8573.84 922.593   7
   6   2 -22 46062.2 1292.67   2
   6  -2 -22 50115.2 2040.04   7
   6   2 -24 182231. 2684.97   2
  -6  -2 -24 186043. 2500.95   5
   6  -2 -24 183291. 3908.60   7
   6   2 -26 50517.9 1504.96   2
  -6  -2 -26 52381.3 1356.11   5
   6  -2 -26 52373.3 2114.94   7
  -6   2 -26 53773.4 1416.24   5
  -6  -2 -28 44703.4 1260.28   5
  -6   2 -28 46178.6 1300.16   5
   6  -2 -28 45855.2 1991.01   7
  -6  -2 -30 3096.65 380.319   5
  -6   2 -30 3836.48 416.042   5
  -6  -2 -32 144.984 204.706   5
  -6   2 -32 381.975 179.409   3
  -6   2 -32 206.615 194.592   5
  -6   2 -34 9604.90 614.214   3
  -6  -2 -34 7925.34 581.369   5
  -6   2 -34 8640.79 755.317   7
  -6  -2 -36 477.633 212.514   5
  -6   2 -36 986.796 239.326   3
  -6   2 -36 1195.66 388.030   7
  -6   2 -38 17650.3 1112.23   7
  -6  -2 -38 18091.6 1107.52   7
  -6   2 -40 13727.3 972.646   7
  -6  -2 -40 13541.7 977.653   7
  -6   2 -42 27405.9 1348.65   7
  -6  -2 -42 35625.8 1506.79   7
  -6  -2 -44 26935.5 1298.96   7
   6   4  -6 3318.35 261.540   2
   6   4   6 2859.54 153.277   2
   6  -4   8 23042.1 701.730   1
   6   4  -8 24000.3 697.918   2
   6   4 -10 55748.8 1087.04   2
   6  -4  10 51085.7 1075.25   1
   6  -4  12 5563.39 381.179   1
   6   4 -12 5801.83 383.774   2
   6  -4  14 30415.8 904.493   1
   6   4 -14 30529.1 899.772   2
  -6   4 -14 29692.1 868.459   4
   6   4 -14 29183.8 900.718   6
   6   4 -16 31058.9 955.401   6
   6  -4  16 33905.1 1012.75   1
  -6   4 -16 33949.2 944.304   4
   6   4 -16 33887.5 979.790   2
   6   4 -18 53259.2 1277.44   6
   6   4 -18 56586.7 1320.84   2
   6  -4  18 58312.1 1410.61   1
   6  -4 -18 54426.2 2054.46   7
  -6   4 -18 56339.1 1313.30   4
   6   4 -20 16849.2 743.461   6
   6  -4 -20 18440.1 1243.08   7
   6   4 -20 19352.8 816.272   2
   6  -4  20 18525.6 855.234   1
   6   4 -22 32340.2 1104.43   2
  -6  -4 -22 31088.2 1034.50   5
   6  -4 -22 33032.4 1635.18   7
   6   4 -24 11355.0 701.080   2
  -6  -4 -24 12494.2 665.511   5
   6  -4 -24 11888.2 1063.92   7
   6   4 -26 14283.6 820.332   2
  -6  -4 -26 16630.5 763.832   5
   6  -4 -26 15768.2 1219.38   7
   6   4 -28 7448.72 633.966   2
  -6  -4 -28 7972.03 555.487   5
  -6   4 -28 7875.10 570.082   5
   6  -4 -28 7570.32 860.097   7
   6   4 -30 6581.82 624.822   2
  -6  -4 -30 6627.21 519.656   5
   6  -4 -30 4852.11 725.419   7
  -6  -4 -32 54024.5 1406.93   5
  -6   4 -32 57505.6 1452.17   3
  -6   4 -32 53833.0 1822.89   7
  -6  -4 -34 30138.2 1088.55   5
  -6   4 -34 30618.9 1413.26   7
  -6   4 -36 54.5101 185.761   3
  -6   4 -36 20.5350 301.785   7
  -6   4 -38 531.085 170.950   3
  -6  -4 -40 8860.24 797.167   7
  -6  -4 -42 10796.3 859.455   7
  -6  -4 -44 4693.39 596.106   7
   6  -6   4 48517.8 997.037   1
   6  -6   6 6798.05 401.712   1
   6  -6   8 10626.8 509.115   1
   6  -6  10 28332.5 846.551   1
   6   6 -12 117701. 1818.18   6
   6   6 -12 117313. 1751.25   2
  -6   6 -12 115002. 1614.62   4
   6   6 -14 70700.4 1446.99   6
   6   6 -14 70388.0 1422.40   2
  -6   6 -14 66614.9 1291.36   4
   6  -6  14 69767.2 1450.25   1
   6   6 -16 152121. 2168.35   6
  -6   6 -16 156945. 2012.04   4
   6   6 -16 152649. 2166.11   2
   6  -6  16 156821. 2312.33   1
   6   6 -18 110830. 1896.45   6
  -6  -6 -18 112061. 1803.81   5
   6   6 -18 115997. 1978.26   2
   6  -6  18 118374. 2135.72   1
   6   6 -20 20926.9 853.386   6
  -6  -6 -20 21045.6 808.809   5
   6  -6  20 22164.9 999.662   1
   6   6 -20 21809.1 906.286   2
   6   6 -22 4573.96 429.356   6
   6  -6  22 5487.59 564.861   1
   6   6 -22 5193.05 477.199   2
  -6  -6 -22 5102.39 440.420   5
   6  -6 -22 3852.25 650.329   7
   6   6 -24 721.349 228.238   6
  -6  -6 -24 1213.99 265.776   5
   6  -6 -24 636.366 491.036   7
   6   6 -24 780.389 244.557   2
   6   6 -26 187.414 193.369   2
  -6  -6 -26 29.9339 221.199   5
   6  -6 -26 179.803 457.729   7
   6   6 -28 2984.23 442.088   2
  -6  -6 -28 2095.08 324.473   5
   6  -6 -28 2522.12 678.458   7
   6   6 -30 32631.6 1394.03   2
  -6  -6 -30 35871.3 1151.19   5
   6  -6 -30 32587.4 1676.04   7
  -6  -6 -32 90415.4 1823.50   5
  -6   6 -32 94404.7 1871.41   3
  -6  -6 -34 78659.5 1734.88   5
  -6   6 -34 83284.5 1803.61   3
  -6   6 -36 25420.5 1014.52   3
  -6   6 -38 5.36993 167.457   3
  -6   6 -40 6888.72 515.478   3
  -6  -6 -40 8101.46 764.593   7
  -6  -6 -42 5172.45 607.761   7
   6  -8   2 90911.0 1426.16   1
   6  -8   4 16225.5 617.325   1
   6  -8   6 80.8531 121.934   1
   6   8  -8 12160.3 574.860   6
   6  -8   8 12545.9 588.318   1
  -6   8  -8 11352.9 523.864   4
   6   8 -10 47638.4 1161.14   6
   6  -8  10 48054.5 1187.51   1
  -6   8 -10 49356.8 1062.23   4
   6   8 -12 39067.2 1096.47   6
   6  -8  12 41032.1 1137.94   1
  -6   8 -12 38691.5 979.385   4
   6   8 -14 171442. 2335.10   6
   6  -8  14 167199. 2371.22   1
  -6  -8 -14 163677. 2099.61   5
  -6   8 -14 169122. 2044.73   4
   6   8 -16 169019. 2369.67   6
  -6  -8 -16 163386. 2128.06   5
   6   8 -16 166178. 2397.41   2
  -6   8 -16 167346. 2132.68   4
   6   8 -18 153764. 2311.33   6
   6  -8  18 158959. 2653.72   1
  -6  -8 -18 153976. 2091.00   5
   6   8 -18 152785. 2363.59   2
   6   8 -20 89259.7 1796.83   6
  -6  -8 -20 90025.6 1626.80   5
   6  -8  20 94912.9 2180.81   1
   6   8 -20 93722.9 1944.35   2
   6   8 -22 18280.5 841.151   6
  -6  -8 -22 19157.9 783.991   5
   6  -8  22 20518.2 1086.50   1
   6   8 -22 18816.3 915.733   2
   6  -8  24 17819.7 1073.79   1
   6   8 -24 15902.3 808.289   6
  -6  -8 -24 16946.8 739.073   5
   6   8 -24 15850.1 884.940   2
   6   8 -26 87.0796 177.570   2
  -6  -8 -26-347.091 278.082   5
  -6  -8  26 156.930 170.969   1
   6   8 -28 2631.29 419.840   2
  -6  -8 -28 2461.70 347.590   5
   6  -8 -28 2212.96 563.563   7
  -6  -8 -30 34408.0 1144.34   5
   6  -8 -30 30060.1 1668.51   7
  -6  -8 -32 85932.9 1799.26   5
  -6   8 -32 85766.3 1799.94   3
  -6   8 -34 108879. 2042.55   3
  -6   8 -36 52911.8 1459.65   3
  -6   8 -38 1315.34 271.991   3
  -6   8 -40 1111.62 232.839   3
  -6   8 -42 1434.95 261.902   3
  -6  -8 -42 2481.74 500.657   7
   6 -10   0 389610. 3081.31   1
   6 -10   2 148265. 1929.79   1
   6  10  -2 150634. 1963.70   6
   6  10  -4 946.950 195.725   6
   6 -10   4 704.989 166.135   1
   6  10  -6 14156.6 638.460   6
   6 -10   6 13102.7 611.878   1
  -6  10  -6 13685.5 561.676   4
   6  10  -8 4905.43 400.306   6
   6 -10   8 6000.94 440.425   1
  -6 -10  -8 4802.92 373.453   5
  -6  10  -8 5597.07 368.091   4
   6  10 -10 3600.50 345.331   6
   6 -10  10 3442.70 359.893   1
  -6 -10 -10 3426.36 325.184   5
  -6  10 -10 3414.04 305.639   4
   6  10 -12 48176.0 1237.07   6
   6 -10  12 49082.1 1306.79   1
  -6 -10 -12 48395.4 1124.25   5
  -6  10 -12 48449.8 1105.85   4
   6  10 -14 59551.6 1443.55   6
   6 -10  14 60458.1 1522.84   1
  -6 -10 -14 59364.7 1256.92   5
  -6  10 -14 61098.2 1299.55   4
   6 -10  16 99235.3 2032.70   1
   6  10 -16 98415.3 1875.41   6
  -6 -10 -16 95481.0 1612.88   5
   6  10 -18 111807. 2074.04   6
   6 -10  18 112822. 2278.79   1
  -6 -10 -18 114624. 1794.85   5
   6  10 -18 117205. 2201.39   2
   6 -10  20 119221. 2494.63   1
   6  10 -20 117687. 2129.65   6
  -6 -10 -20 118420. 1872.23   5
   6  10 -20 118348. 2308.81   2
   6  10 -22 69678.8 1667.74   6
  -6 -10 -22 68846.7 1451.71   5
   6 -10  22 73052.3 2116.87   1
   6  10 -22 68352.4 1829.08   2
   6  10 -24 457.742 225.825   2
   6  10 -24 110.888 225.163   6
   6 -10  24 230.375 237.370   1
  -6 -10 -24 86.5644 255.450   5
  -6 -10  24 252.382 168.808   1
   6  10 -26 324.188 215.704   2
   6  10 -26-163.533 249.089   6
  -6 -10  26-86.8055 159.209   1
  -6 -10 -26-314.115 309.507   5
   6  10 -28-119.622 215.681   2
  -6 -10 -28-1067.06 349.036   5
  -6 -10 -30 13816.1 733.759   5
  -6  10 -30 14347.1 737.136   3
  -6  10 -32 62778.9 1541.06   3
  -6  10 -34 68384.0 1629.28   3
  -6  10 -36 33940.1 1158.57   3
  -6  10 -38 3658.01 395.758   3
  -6  10 -40 1936.76 286.841   3
  -6 -10 -42 3686.23 533.458   7
   6  12   0 193070. 2351.38   6
   6 -12   0 213999. 2515.29   1
   6 -12  -2 45228.6 1106.86   1
   6 -12   2 43385.0 1133.30   1
   6  12   2 39325.0 1062.86   6
   6  12  -2 42179.9 1101.99   6
  -6  12  -2 37277.3 952.208   4
  -6  12  -4 1245.98 197.522   4
   6  12   4 1331.61 212.511   6
   6  12  -4 1253.14 215.554   6
   6 -12   4 1296.33 224.784   1
   6  12   6 39994.1 1109.59   6
   6  12  -6 47578.2 1204.65   6
   6 -12   6 44786.4 1193.33   1
  -6 -12  -6 40450.4 968.967   5
  -6  12  -6 46936.3 1068.52   4
   6  12  -8 99413.8 1774.71   6
   6 -12   8 91817.5 1732.50   1
  -6 -12  -8 89761.0 1467.87   5
  -6  12  -8 97327.2 1559.18   4
   6  12 -10 11631.1 622.774   6
   6 -12  10 9854.75 616.932   1
  -6 -12 -10 11034.7 535.020   5
  -6  12 -10 11433.9 560.775   4
   6 -12  12 2075.04 312.242   1
   6  12 -12 1915.49 291.352   6
  -6  12 -12 1642.33 231.124   4
  -6 -12 -12 1961.25 251.313   5
   6 -12  14 16829.6 858.802   1
   6  12 -14 16751.3 798.362   6
  -6 -12 -14 15541.7 670.039   5
   6  12 -16 18017.0 857.621   6
   6 -12  16 17968.1 924.112   1
  -6 -12 -16 18242.4 720.820   5
   6  12 -18 16581.6 824.379   6
   6 -12  18 16885.1 931.112   1
  -6 -12 -18 16086.6 707.142   5
   6  12 -20 30161.2 1140.37   6
   6 -12  20 30390.5 1291.44   1
  -6 -12 -20 31127.8 991.255   5
   6  12 -20 30580.9 1262.23   2
   6  12 -22 11872.5 721.904   6
  -6 -12  22 11978.7 748.503   1
   6 -12  22 12713.7 901.514   1
  -6 -12 -22 13037.3 670.216   5
   6  12 -22 13001.0 845.928   2
   6  12 -24 1268.12 341.944   2
   6  12 -24 812.948 233.372   6
   6 -12  24 893.386 292.228   1
  -6 -12 -24 1577.99 294.609   5
  -6 -12  24 905.028 271.052   1
   6  12 -26 35243.1 1237.47   6
  -6 -12  26 31264.8 1298.01   1
  -6 -12 -26 34980.0 1126.64   5
   6  12 -26 37613.0 1531.58   2
   6 -12  26 31487.1 1604.56   1
  -6 -12 -28 7871.38 551.658   5
  -6  12 -30 639.515 211.174   3
  -6  12 -32 3635.43 407.318   3
  -6  12 -34 26596.2 1008.34   3
  -6  12 -36 9390.91 606.059   3
  -6  12 -38-23.0924 173.020   3
  -6  12 -40 18562.8 788.148   3
   6  14   0 517.939 195.204   6
   6 -14   0 431.517 194.716   1
   6  14   2 2720.44 331.639   6
   6  14  -2 2566.17 332.860   6
   6 -14  -2 3208.65 343.659   1
   6 -14   2 2837.87 335.574   1
  -6  14  -2 2061.86 247.722   4
   6  14   4 31145.9 1030.39   6
   6  14  -4 30109.1 1015.99   6
   6 -14   4 32463.8 1090.02   1
   6  14  -6 113815. 1979.05   6
   6 -14   6 115880. 2032.99   1
  -6  14  -6 111458. 1712.67   4
   6  14  -8 144572. 2253.67   6
   6 -14   8 140112. 2312.73   1
  -6 -14  -8 136804. 1869.25   5
  -6  14  -8 147091. 2019.48   4
   6  14 -10 122738. 2110.25   6
  -6 -14 -10 123806. 1810.61   5
   6  14 -12 44431.9 1301.32   6
  -6 -14 -12 42885.6 1098.95   5
   6  14 -14 2072.80 357.423   6
  -6 -14 -14 2045.41 308.288   5
   6 -14  14 1558.86 313.778   1
   6  14 -16 210.303 248.945   6
  -6 -14 -16 172.698 224.953   5
   6 -14  16 97.0339 188.226   1
   6 -14  18 1878.81 372.967   1
   6  14 -18 2643.74 400.701   6
  -6 -14 -18 2729.15 376.806   5
   6  14 -20 10101.3 687.031   6
  -6 -14  20 9369.28 658.748   1
   6 -14  20 8856.09 734.721   1
  -6 -14 -20 11068.3 654.906   5
  -6 -14  22 19895.1 998.474   1
   6 -14  22 19922.0 1136.22   1
   6  14 -22 22767.8 1026.69   6
  -6 -14 -22 22789.4 890.036   5
   6  14 -22 22193.6 1156.46   2
   6  14 -24 25568.6 1090.31   6
  -6 -14  24 22145.6 1087.35   1
  -6 -14 -24 27249.7 998.249   5
   6 -14  24 22386.7 1303.94   1
   6  14 -24 25214.3 1270.83   2
   6  14 -26 57900.8 1602.68   6
   6  14 -28 58088.1 1616.34   6
  -6  14 -28 60299.9 1460.54   3
  -6  14 -30 18241.9 840.887   3
  -6  14 -32 1071.02 259.165   3
  -6  14 -34 1096.13 251.257   3
  -6  14 -36 127.630 160.577   3
  -6  14 -38 16625.7 752.821   3
  -6  14 -40 55191.9 1298.49   3
   6  16   0 235.837 193.763   6
   6 -16   0 84.3412 146.482   1
   6  16   2 23642.9 984.340   6
   6  16  -2 21610.3 932.921   6
   6 -16  -2 23813.6 962.093   1
   6 -16   2 23725.9 976.832   1
   6  16   4 20651.7 925.039   6
   6  16  -4 18922.7 881.283   6
   6 -16   4 20308.7 930.119   1
   6  16   6 73918.0 1754.62   6
   6  16  -6 70317.6 1673.67   6
   6 -16   6 74919.8 1772.48   1
   6  16  -8 98522.0 1982.90   6
   6 -16   8 98873.8 2080.07   1
   6 -16  10 116736. 2297.89   1
   6  16 -10 121935. 2201.91   6
  -6 -16 -10 120689. 1861.51   5
   6  16 -12 26510.3 1056.55   6
  -6 -16 -12 27526.3 927.996   5
   6  16 -14 3416.50 461.144   6
  -6 -16  14 2656.76 368.500   1
  -6 -16 -14 3167.66 366.779   5
   6 -16  14 2619.44 382.034   1
   6 -16  16 3752.90 476.013   1
   6  16 -16 5064.95 512.732   6
  -6 -16  16 4663.85 458.894   1
  -6 -16 -16 5041.54 439.003   5
   6 -16  18 1799.56 354.917   1
   6  16 -18 2337.57 405.061   6
  -6 -16 -18 2860.10 372.560   5
  -6 -16  18 1746.01 332.573   1
   6  16 -20 28482.4 1146.02   6
   6 -16  20 27421.3 1296.26   1
  -6 -16  20 27575.3 1137.89   1
   6  16 -22 59474.3 1665.10   6
   6  16 -24 72470.3 1827.25   6
   6  16 -26 38564.8 1319.45   6
  -6  16 -26 38880.3 1170.02   3
   6  16 -28 61427.8 1646.00   6
  -6  16 -28 63993.4 1520.43   3
  -6  16 -30 5619.53 468.750   3
  -6  16 -32 13.2045 189.930   3
  -6  16 -34 1184.55 242.530   3
  -6  16 -36 3620.14 358.633   3
  -6  16 -38 25332.6 873.385   3
   6 -18   0 8777.52 665.843   1
   6  18   0 7518.79 589.401   6
  -6 -18   0 8715.67 549.849   1
   6 -18   2-193.852 211.465   1
   6  18   2-175.525 287.590   6
   6  18  -2-213.624 272.074   6
  -6 -18   2 424.101 190.735   1
   6 -18  -2 138.107 163.031   1
  -6 -18  -2 217.413 156.778   1
   6  18   4 13230.5 813.603   6
  -6 -18   4 12337.9 686.874   1
   6  18  -4 11669.1 736.953   6
   6 -18   4 11811.7 768.247   1
   6  18   6 9138.80 695.009   6
   6  18  -6 8978.82 647.948   6
  -6 -18   6 8412.10 610.865   1
   6 -18   6 8980.07 682.258   1
   6  18  -8 68681.1 1735.88   6
  -6 -18   8 69655.5 1627.00   1
   6 -18   8 66424.5 1813.19   1
   6  18 -10 24098.0 1038.11   6
  -6 -18  10 23740.5 975.434   1
   6 -18  10 22233.6 1069.40   1
   6  18 -12 5630.03 541.954   6
   6 -18  12 4557.78 514.376   1
  -6 -18  12 4097.17 446.518   1
   6  18 -14 5741.89 545.849   6
   6 -18  14 4828.31 531.743   1
  -6 -18  14 5036.76 509.194   1
   6 -18  16 2417.03 400.296   1
   6  18 -16 3510.94 460.545   6
  -6 -18  16 3010.57 409.159   1
  -6 -18  18 900.636 275.522   1
   6 -18  18 543.510 208.981   1
   6  18 -18 1187.80 302.752   6
   6  18 -20 164.086 226.871   6
   6  18 -22 33793.1 1257.76   6
   6  18 -24 51837.7 1536.47   6
  -6  18 -24 50895.0 1324.24   3
   6  18 -26 61399.5 1662.09   6
  -6  18 -26 62444.2 1474.27   3
   6  18 -28 1677.77 314.658   6
  -6  18 -28 1683.85 286.174   3
  -6  18 -30 439.053 201.919   3
  -6  18 -32 4843.29 422.047   3
  -6  18 -34 2060.67 285.476   3
  -6  18 -36 1698.80 233.895   3
   6  20   0 6663.89 593.351   6
   6 -20   0 6192.57 589.907   1
  -6 -20   2 1048.71 272.382   1
   6  20   2 713.919 257.312   6
   6 -20   2 1175.67 263.840   1
   6  20  -2 1179.87 291.094   6
   6  20   4 5892.21 589.963   6
   6  20  -4 5048.73 520.370   6
  -6 -20   4 5015.34 477.882   1
   6 -20   4 4979.43 542.642   1
   6  20   6 14137.7 915.653   6
   6  20  -6 12679.9 804.083   6
  -6 -20   6 13485.2 769.466   1
   6 -20   6 13272.3 892.236   1
   6 -20   8 1225.26 332.614   1
   6  20  -8 991.803 305.973   6
  -6 -20   8 1172.22 303.192   1
   6 -20  10 2244.04 392.058   1
   6  20 -10 2943.56 433.758   6
  -6 -20  10 2168.46 339.106   1
   6  20 -12 21571.8 1016.76   6
  -6 -20  12 19443.6 980.809   1
   6 -20  12 18597.4 1063.24   1
   6  20 -14 4138.90 481.135   6
   6  20 -16 24335.3 1057.24   6
   6  20 -18 32720.4 1214.68   6
   6  20 -20 1432.01 312.873   6
  -6  20 -20 1737.75 275.498   3
   6  20 -22 4846.59 516.445   6
  -6  20 -22 5106.38 447.793   3
  -6  20 -24 34406.9 1082.35   3
   6  20 -24 36866.3 1279.13   6
   6  20 -26 7465.82 580.485   6
  -6  20 -26 7229.32 515.107   3
   6  20 -28 691.257 208.079   6
  -6  20 -28 1247.45 245.604   3
  -6  20 -30 9430.67 567.876   3
  -6  20 -32 5833.13 438.406   3
  -6  20 -34 2311.45 283.936   3
   6 -22   0 12851.2 906.877   1
   6  22   0 17934.9 1016.16   6
   6  22   2 28594.8 1312.35   6
   6  22  -2 27550.8 1240.37   6
   6  22   4 4438.89 577.098   6
   6  22  -4 4235.11 526.190   6
   6 -22   4 2604.09 408.496   1
  -6 -22   4 2357.83 384.069   1
   6  22  -6 6985.86 634.065   6
  -6 -22   6 4033.61 517.659   1
   6  22  -8 1175.20 373.397   6
   6  22 -10 13600.0 853.213   6
   6  22 -12 557.192 298.725   6
   6  22 -14 13559.6 813.702   6
   6  22 -16 75216.2 1830.82   6
  -6  22 -16 64423.6 1461.32   3
   6  22 -18 55543.3 1566.62   6
  -6  22 -18 47631.0 1268.32   3
   6  22 -20 18537.8 916.322   6
  -6  22 -20 17130.5 771.198   3
   6  22 -22 61.1243 197.630   6
  -6  22 -22 65.6253 175.955   3
   6  22 -24 1387.86 293.276   6
  -6  22 -24 1450.40 259.891   3
   6  22 -26 2474.38 336.790   6
  -6  22 -26 2446.59 308.014   3
   6  22 -28 1904.31 288.326   6
  -6  22 -28 2207.68 285.877   3
  -6  22 -30 7528.07 484.913   3
   6  24   0 59583.1 1893.36   6
   6  24   2 29548.3 1393.01   6
   6  24  -2 28871.4 1294.97   6
   6  24   4 28288.6 1389.79   6
   6  24  -4 26989.0 1228.28   6
   6  24  -6 17311.3 976.448   6
   6  24  -8 1740.31 398.342   6
   6  24 -10 1233.74 368.150   6
   6  24 -12 3855.57 485.606   6
   6  24 -14 43970.4 1398.67   6
   6  24 -16 56279.7 1559.90   6
   6  24 -18 56834.1 1547.89   6
   6  24 -20 31441.6 1136.90   6
   6  24 -22 4528.39 453.492   6
  -6  24 -22 4269.73 420.051   6
   6  24 -24-45.5071 183.171   6
  -6  24 -24 7.39062 130.711   3
   6  24 -26 58.2429 162.485   6
  -6  24 -26 294.920 158.323   3
   6  26   0 25304.4 1245.52   6
   6  26   2 23627.8 1243.62   6
   6  26  -2 22552.1 1147.54   6
   6  26  -4 7849.12 679.149   6
   6  26  -6 214.222 254.924   6
   6  26  -8-96.5358 242.640   6
   6  26 -10 1384.36 313.670   6
   6  26 -12 1968.90 369.327   6
   6  26 -14 17595.4 875.329   6
   6  26 -16 31037.3 1128.34   6
   6  26 -18 27557.2 1039.67   6
   6  26 -20 8052.75 562.074   6
  -6  26 -20 7684.22 532.497   6
   6  26 -22 807.952 227.782   6
  -6  26 -22 565.048 196.295   6
   6  26 -24 187.159 157.882   6
   6  28   0 4338.31 544.672   6
   6  28   2 1824.98 385.810   6
   6  28  -2 1705.82 365.550   6
   6  28  -4 881.328 284.648   6
   6  28  -6 7158.08 582.829   6
   6  28  -8 14712.7 822.055   6
   6  28 -10 2250.11 332.787   6
   6  28 -12 513.565 205.775   6
   6  28 -14 675.858 209.872   6
   6  28 -16 5572.37 462.298   6
  -6  28 -16 5728.88 476.692   6
   6  28 -18 1712.17 262.973   6
  -6  28 -18 1592.93 261.934   6
   6  28 -20-280.275 172.309   6
   6  30  -2 148.129 186.877   6
   6  30  -4 3316.85 405.004   6
   6  30  -6 16148.0 821.411   6
   6  30  -8 15689.0 775.265   6
   6  30 -10 8218.81 550.282   6
   6  30 -12 713.709 194.002   6
  -6  30 -12 935.609 219.402   6
   6  30 -14-129.997 166.535   6
   7   1  -1 162690. 1535.53   2
   7   1   1 164901. 1417.19   2
   7   1  -3 50812.0 922.858   2
   7   1  -5 8159.18 395.427   2
   7  -1  -5 8462.01 399.545   2
   7   1  -7 34004.9 822.465   2
   7  -1  -7 34913.6 834.302   2
   7   1  -9 117044. 1602.26   2
   7  -1  -9 116529. 1572.01   2
   7   1 -11 101448. 1562.87   2
   7   1 -11 97844.1 1627.36   6
   7  -1 -11 101747. 1539.19   2
  -7   1 -13 247.166 128.355   4
  -7  -1 -13 343.578 158.063   4
   7  -1 -13 188.858 172.149   6
   7   1 -13 187.811 129.319   2
   7  -1 -13 171.132 141.547   2
   7   1 -13 156.077 159.269   6
   7   1 -15 66458.7 1403.83   6
   7   1 -15 70665.4 1421.08   2
   7  -1 -15 71433.4 1423.96   2
  -7   1 -15 70956.4 1375.75   4
  -7  -1 -15 66085.0 1355.79   4
   7  -1 -15 64491.7 1347.02   6
  -7   1 -17 82552.9 1566.58   4
   7   1 -17 80346.7 1594.80   6
   7   1 -17 84378.3 1627.83   2
   7  -1 -17 85912.4 1635.80   2
  -7  -1 -17 83145.8 1551.02   4
   7  -1 -17 79165.4 1541.40   6
   7   1 -19 12324.1 658.046   2
  -7   1 -19 12814.8 637.964   4
  -7  -1 -19 11392.7 629.934   4
   7  -1 -19 11772.7 612.074   6
   7   1 -19 12587.1 647.819   6
   7   1 -21 2824.63 343.539   6
   7   1 -21 3195.68 373.441   2
   7  -1 -21 2733.58 326.123   6
   7   1 -23 17522.0 869.663   2
  -7  -1 -25 14407.1 783.196   5
  -7  -1 -27 1297.94 336.637   5
  -7   1 -27 2347.77 371.017   5
  -7  -1 -29-37.2601 244.403   5
  -7   1 -29 203.678 254.314   5
  -7  -1 -31 4007.62 412.835   5
  -7   1 -31 3885.27 415.396   5
  -7  -1 -33 16047.7 789.864   5
  -7   1 -33 17083.1 807.740   5
  -7   1 -33 18863.4 826.469   3
  -7  -1 -35 16554.5 799.753   5
  -7   1 -35 16411.4 799.847   5
  -7   1 -35 18558.7 1090.68   7
  -7  -1 -37 6291.30 506.149   5
  -7   1 -37 7828.81 748.656   7
  -7  -1 -37 7114.69 746.538   7
  -7  -1 -39 1670.55 426.665   7
  -7   1 -39 1883.19 457.389   7
  -7  -1 -41 969.495 372.059   7
   7   3  -1 26553.6 649.097   2
   7   3   1 25845.2 592.365   2
   7   3   3 71103.4 898.379   2
   7   3  -3 71207.2 1123.84   2
   7   3  -5 636.022 125.269   2
   7   3  -7 17301.7 605.002   2
   7   3  -9 51454.6 1085.21   2
   7   3 -11 4976.36 383.789   6
   7  -3 -11 4662.85 358.434   6
   7   3 -11 4884.54 356.140   2
  -7   3 -11 4891.53 357.283   4
  -7   3 -13 329.354 152.018   4
   7  -3 -13 346.000 139.291   6
   7   3 -13 475.820 167.620   6
   7   3 -13 486.636 143.139   2
   7  -3 -15 12285.8 593.893   6
   7   3 -15 13631.7 639.659   2
   7   3 -15 12261.3 618.211   6
  -7   3 -15 12703.2 612.261   4
   7   3 -17 49467.5 1269.63   6
  -7   3 -17 51578.5 1211.11   4
  -7  -3 -17 44991.0 1119.88   4
   7  -3 -17 45875.6 1155.60   6
   7   3 -17 50728.8 1284.88   2
   7   3 -19 30736.1 1029.54   6
  -7   3 -19 33216.4 1032.78   4
  -7  -3 -19 28554.8 962.263   4
   7  -3 -19 28438.2 932.647   6
   7   3 -19 31417.1 1065.30   2
   7   3 -21 1.85173 166.146   6
   7   3 -21-16.8952 158.129   2
   7   3 -23 28084.2 1121.81   2
  -7  -3 -23 29659.9 1061.89   5
   7   3 -25 17204.4 907.046   2
  -7  -3 -25 18643.3 852.551   5
   7   3 -27 20959.1 1054.60   2
  -7  -3 -27 22004.9 906.946   5
  -7   3 -27 22752.0 951.870   5
  -7  -3 -29 22215.0 910.793   5
  -7   3 -29 22888.8 948.327   5
  -7  -3 -31 26944.0 985.154   5
  -7   3 -31 29220.8 1026.43   5
  -7  -3 -33 8381.03 575.756   5
  -7   3 -33 10198.5 626.935   3
  -7   3 -35 18587.6 838.724   3
  -7  -3 -35 15741.9 772.265   5
  -7   3 -37 2734.62 337.499   3
  -7  -3 -39 413.072 298.677   7
  -7  -3 -41 6351.48 658.215   7
   7   5   1 18699.8 555.094   2
   7   5  -1 19018.3 584.540   2
   7   5  -3 7181.56 388.015   2
   7   5   3 6718.73 314.283   2
   7   5  -5 2823.52 260.368   2
   7   5   5 2494.75 172.979   2
   7   5  -7 12087.1 569.319   6
   7   5  -7 13154.8 551.498   2
   7   5  -9 9848.90 534.404   6
   7   5  -9 9595.67 503.765   2
   7  -5  -9 9839.30 497.396   6
   7   5 -11 1430.91 240.716   2
   7   5 -11 1575.75 249.542   6
  -7   5 -11 1527.03 214.923   4
   7  -5 -11 1299.22 222.412   6
  -7   5 -13 1521.76 233.956   4
   7  -5 -13 1367.48 221.433   6
   7   5 -13 1341.70 237.126   6
   7   5 -13 1698.75 263.156   2
   7   5 -15 31949.6 1010.95   6
  -7   5 -15 32447.7 935.445   4
   7  -5 -15 30070.6 902.376   6
   7   5 -15 32555.5 1028.10   2
   7   5 -17 36871.7 1117.42   6
  -7   5 -17 39134.9 1058.80   4
   7   5 -17 40359.7 1187.71   2
   7  -5 -19 16689.7 712.559   6
   7   5 -19 18199.7 810.850   6
  -7   5 -19 17841.6 801.662   4
   7   5 -19 18605.0 846.847   2
   7   5 -21 4351.46 425.431   6
  -7  -5 -21 5053.40 451.766   5
   7   5 -21 4508.04 445.900   2
   7   5 -23 27412.9 1122.04   2
   7   5 -23 26931.1 1031.15   6
  -7  -5 -23 28900.9 1026.25   5
   7   5 -25 40083.9 1415.34   2
  -7  -5 -25 44001.3 1234.15   5
   7   5 -27 3453.82 476.239   2
  -7  -5 -27 4237.18 441.675   5
   7   5 -29 43.8186 215.852   2
  -7  -5 -29 36.8337 240.888   5
  -7   5 -29-29.3291 205.031   5
  -7  -5 -31 47520.5 1321.20   5
  -7  -5 -33 26689.2 1013.49   5
  -7   5 -33 28063.4 1043.02   3
  -7  -5 -35 5001.47 457.261   5
  -7   5 -35 5802.99 488.888   3
  -7   5 -37 260.825 193.700   3
  -7   5 -39 10993.0 629.570   3
  -7  -5 -41 22334.3 1171.40   7
   7   7  -3 1552.14 236.143   6
   7  -7  -3 1393.86 221.281   6
   7   7  -5 36032.3 976.751   6
   7  -7  -5 34522.8 892.531   6
   7  -7  -7 2232.70 265.943   6
   7   7  -7 2370.57 284.156   6
   7  -7   7 1893.51 252.344   1
   7   7  -9 48721.8 1185.77   6
   7  -7  -9 47356.2 1076.96   6
   7  -7   9 46567.7 1173.52   1
  -7   7  -9 47227.0 1082.70   4
   7   7 -11 26774.1 918.389   6
  -7   7 -11 26971.4 838.574   4
   7  -7  11 25709.5 916.505   1
   7   7 -11 26678.2 906.341   2
   7  -7 -11 26726.5 825.280   6
  -7   7 -13 13883.8 625.073   4
   7   7 -13 14910.9 699.785   6
   7  -7  13 15035.9 736.575   1
   7   7 -13 15991.2 725.370   2
   7  -7 -13 14422.0 637.110   6
   7   7 -15 18045.3 799.188   6
   7  -7  15 19058.0 864.491   1
   7   7 -15 18933.5 829.809   2
  -7   7 -15 18808.1 722.581   4
   7  -7 -15 16247.2 677.738   6
   7   7 -17 30946.2 1082.98   2
   7   7 -17 28145.9 1004.40   6
   7  -7  17 30483.5 1159.28   1
  -7   7 -17 28893.3 965.508   4
   7   7 -19 11689.2 665.389   6
  -7  -7 -19 12170.6 636.634   5
   7  -7  19 13134.4 819.423   1
   7   7 -19 13313.9 747.493   2
   7   7 -21 5005.16 464.538   6
   7  -7  21 5908.26 601.406   1
   7   7 -21 4960.79 499.776   2
  -7  -7 -21 5250.85 454.342   5
   7   7 -23 14106.1 770.312   6
  -7  -7 -23 15298.4 731.333   5
   7   7 -23 14637.1 847.102   2
   7   7 -25 23596.5 989.448   6
  -7  -7 -25 24131.3 924.559   5
   7   7 -25 23916.5 1134.42   2
   7   7 -27 25495.9 1226.22   2
  -7  -7 -27 27091.5 968.078   5
  -7  -7 -29 120.073 272.496   5
  -7  -7 -31 5345.14 486.240   5
  -7  -7 -33 37577.8 1210.38   5
  -7   7 -33 39779.0 1240.72   3
  -7   7 -35 7256.87 545.312   3
  -7   7 -37 835.258 235.529   3
  -7   7 -39 22697.1 902.429   3
  -7  -7 -41 41585.5 1536.90   7
  -7   7 -41 35286.8 1072.75   3
   7   9   1 19368.8 737.398   6
   7   9  -1 21686.9 770.323   6
   7   9  -3 7211.84 468.628   6
   7   9   3 6262.58 434.477   6
  -7   9  -5 33605.5 911.926   4
   7   9  -5 32070.8 959.291   6
   7   9  -7 152811. 2117.66   6
   7  -9   7 154328. 2175.07   1
  -7   9  -7 156825. 1968.73   4
   7   9  -9 33825.9 1011.07   6
   7  -9   9 33506.2 1087.13   1
  -7   9  -9 33361.6 951.326   4
   7  -9  11 2971.97 353.530   1
   7   9 -11 3411.58 360.659   6
  -7   9 -11 3407.06 325.263   4
  -7   9 -13 469.489 168.686   4
   7  -9  13 299.285 148.645   1
   7   9 -13 509.057 202.754   6
  -7  -9 -13 669.330 202.784   5
   7  -9  15 17175.7 862.472   1
   7   9 -15 16356.4 791.111   6
  -7  -9 -15 16585.4 711.917   5
   7   9 -15 17831.8 853.346   2
  -7   9 -15 16406.9 718.360   4
   7   9 -17 11120.8 662.465   6
   7  -9  17 11463.3 754.077   1
  -7  -9 -17 11840.7 619.516   5
   7   9 -17 12368.1 722.127   2
   7   9 -19 1899.45 344.389   2
   7   9 -19 1782.18 306.074   6
  -7  -9 -19 1305.44 242.130   5
   7  -9  19 1366.47 298.482   1
   7   9 -21 18639.4 880.527   6
   7  -9  21 21001.5 1157.98   1
  -7  -9 -21 19366.2 795.462   5
   7   9 -21 19146.6 957.390   2
   7   9 -23 6762.45 549.766   6
  -7  -9 -23 6994.52 503.569   5
   7  -9  23 8352.18 798.672   1
   7   9 -23 7201.88 632.042   2
   7   9 -25 43306.0 1365.10   6
  -7  -9 -25 45162.5 1227.58   5
   7   9 -25 44743.2 1577.49   2
   7   9 -27 29831.3 1149.11   6
  -7  -9 -27 33352.3 1086.18   5
   7   9 -27 31929.6 1400.81   2
  -7  -9 -29 7358.03 543.176   5
  -7  -9 -31 4844.40 472.699   5
  -7  -9 -33 6625.07 553.139   5
  -7   9 -33 6145.71 498.771   3
  -7   9 -35 16573.8 808.641   3
  -7   9 -37 690.462 227.852   3
  -7   9 -39 23015.0 898.977   3
  -7   9 -41 24348.5 888.670   3
  -7  -9 -41 28154.0 1266.76   7
   7  11   1 82261.1 1544.36   6
   7  11  -1 81012.8 1563.39   6
   7  11   3 10769.3 582.063   6
   7  11  -3 11497.9 596.712   6
   7 -11   3 11023.0 603.151   1
  -7  11  -3 10810.8 553.834   4
   7  11  -5 72174.2 1494.63   6
   7 -11   5 72643.8 1556.45   1
  -7  11  -5 75890.8 1380.91   4
   7 -11   7 145296. 2240.44   1
   7  11  -7 147354. 2174.39   6
   7 -11   9 50718.2 1388.38   1
   7  11  -9 53649.9 1321.03   6
  -7 -11  -9 51493.9 1169.13   5
  -7  11  -9 51041.1 1189.90   4
   7 -11  11 4931.73 473.834   1
   7  11 -11 5471.09 456.382   6
  -7 -11 -11 5416.49 410.418   5
  -7  11 -11 5468.73 413.066   4
   7  11 -13 171.613 197.513   6
  -7 -11 -13 196.082 160.000   5
   7 -11  13-55.8491 197.997   1
  -7  11 -13 74.5366 164.483   4
   7  11 -15 11228.0 688.665   6
  -7 -11 -15 11003.4 580.113   5
   7 -11  15 10951.6 731.727   1
   7  11 -17 3544.76 424.679   6
  -7 -11 -17 3498.24 350.447   5
   7  11 -17 4382.56 481.744   2
   7 -11  17 3292.47 460.405   1
   7 -11  19 18007.7 1027.69   1
   7  11 -19 18482.5 906.107   6
  -7 -11 -19 18517.6 764.378   5
   7  11 -19 18015.3 952.671   2
   7  11 -21 315.018 208.318   2
   7  11 -21-29.4471 210.112   6
   7 -11  21 43.5605 265.930   1
  -7 -11 -21 170.148 216.791   5
   7  11 -23 319.841 230.498   2
   7  11 -23 227.912 201.074   6
  -7 -11 -23 76.6500 212.399   5
   7 -11  23 110.069 249.862   1
   7  11 -25 21553.0 983.416   6
  -7 -11  25 19965.4 1018.99   1
  -7 -11 -25 22121.6 888.366   5
   7 -11  25 20896.1 1347.91   1
   7  11 -25 22118.9 1156.56   2
   7  11 -27 40138.0 1330.32   6
  -7 -11 -27 40840.1 1199.92   5
  -7 -11 -29 1614.56 301.305   5
  -7  11 -31 559.098 193.660   3
  -7  11 -33 16762.1 806.356   3
  -7  11 -35 9090.88 616.080   3
  -7  11 -37 284.577 164.163   3
  -7  11 -39 10265.4 592.946   3
  -7 -11 -41 20635.6 1038.52   7
   7 -13   1 84945.5 1731.63   1
   7  13   1 82400.5 1649.09   6
   7  13  -1 82049.2 1635.39   6
   7 -13   3-44.5398 182.832   1
  -7  13  -3-44.7653 145.933   4
   7  13   3 94.4036 149.960   6
   7  13  -3 88.9312 164.188   6
   7  13   5 12197.4 656.189   6
   7  13  -5 12149.5 653.835   6
   7 -13   5 13544.8 728.978   1
  -7  13  -5 12234.6 597.202   4
   7 -13   7 90658.4 1903.18   1
   7  13  -7 91047.7 1797.85   6
  -7  13  -7 91792.9 1593.83   4
   7  13  -9 86343.2 1760.48   6
  -7 -13  -9 84647.8 1483.01   5
  -7  13  -9 87638.7 1562.01   4
   7 -13   9 84543.6 1878.03   1
   7  13 -11 21917.0 918.371   6
  -7 -13 -11 21354.3 760.134   5
  -7  13 -11 21559.1 821.864   4
   7 -13  11 19892.7 965.977   1
   7  13 -13 10296.7 654.243   6
  -7 -13 -13 9668.13 528.411   5
   7 -13  13 9934.31 700.389   1
   7  13 -15 958.769 266.101   6
   7 -13  15 1046.98 278.168   1
  -7 -13 -15 783.815 228.105   5
   7  13 -17 11227.3 710.257   6
  -7 -13 -17 11277.5 603.878   5
   7 -13  17 9889.17 786.405   1
   7  13 -19 157.473 190.936   2
   7  13 -19 92.7787 230.419   6
  -7 -13 -19 420.670 200.265   5
   7 -13  19 114.727 245.266   1
   7 -13  21-394.921 323.509   1
   7  13 -21 8.98148 187.216   2
   7  13 -21-338.010 314.032   6
  -7 -13 -21 383.059 244.946   5
   7  13 -23 5981.91 525.138   6
   7 -13  23 4538.25 595.855   1
  -7 -13  23 4769.01 514.539   1
  -7 -13 -23 6151.69 496.189   5
   7  13 -23 6164.87 643.373   2
   7  13 -25 3167.78 393.453   6
  -7 -13 -25 3388.30 381.715   5
   7  13 -27 6045.02 535.014   6
  -7 -13 -27 6781.89 543.372   5
  -7  13 -31 2235.54 339.527   3
  -7  13 -33 13460.9 719.053   3
  -7  13 -35 11057.7 645.298   3
  -7  13 -37 563.107 192.173   3
  -7  13 -39 6807.21 471.794   3
   7  15   1 28743.6 1048.15   6
   7  15  -1 29192.5 1055.40   6
   7 -15   1 31007.0 1113.14   1
   7  15   3 15464.3 784.049   6
   7  15  -3 14235.3 751.764   6
   7 -15   3 13366.8 782.234   1
  -7  15  -3 12863.5 612.894   4
   7  15   5 16016.7 814.807   6
   7 -15   5 15048.6 824.298   1
   7  15  -5 14755.6 778.209   6
  -7  15  -5 14928.7 679.809   4
   7  15  -7 18233.8 861.429   6
  -7  15  -7 19187.7 776.117   4
   7 -15   7 17980.0 901.948   1
   7  15  -9 38305.0 1256.25   6
  -7 -15  -9 36072.7 1007.61   5
   7 -15   9 37395.5 1321.87   1
   7  15 -11 47.4333 229.044   6
   7 -15  11 51.2803 194.532   1
  -7 -15 -11 39.0534 180.915   5
   7  15 -13 5248.53 520.954   6
  -7 -15 -13 5049.59 420.904   5
   7 -15  13 5226.25 534.123   1
   7  15 -15 10996.3 723.874   6
  -7 -15 -15 10483.3 586.806   5
   7 -15  15 9324.98 738.718   1
   7  15 -17 2990.30 420.404   6
   7 -15  17 2892.70 436.047   1
  -7 -15 -17 2952.71 375.634   5
   7 -15  19 4473.09 551.613   1
   7  15 -19 5581.95 537.565   6
  -7 -15  19 4709.35 508.993   1
  -7 -15 -19 5539.52 469.490   5
   7  15 -19 5279.36 596.448   2
   7 -15  21 3374.47 501.716   1
   7  15 -21 3302.75 425.096   6
  -7 -15  21 3686.44 459.469   1
  -7 -15 -21 4441.08 457.481   5
   7  15 -21 3999.94 532.754   2
   7  15 -23 13220.4 785.825   6
  -7 -15 -23 13973.9 732.811   5
   7  15 -25 3339.40 425.587   6
   7  15 -27 6603.30 565.994   6
   7  15 -29 460.272 226.813   6
  -7  15 -29 638.671 216.039   3
  -7  15 -31 6575.43 503.219   3
  -7  15 -33 21414.3 862.473   3
  -7  15 -35 11756.8 629.565   3
  -7  15 -37 2485.08 299.037   3
   7 -17   1 31767.4 1226.50   1
   7  17   1 31203.9 1174.97   6
   7  17  -1 30069.2 1151.92   6
   7  17   3 6736.18 589.329   6
   7  17  -3 5751.54 538.223   6
   7 -17   3 6010.82 558.034   1
   7  17   5 1878.36 350.586   6
   7  17  -5 1752.52 354.957   6
   7 -17   5 1462.70 285.231   1
   7 -17   7 11905.2 795.430   1
   7  17  -7 12493.1 781.463   6
   7  17  -9 359.055 285.394   6
   7 -17   9 4.29260 212.801   1
   7  17 -11 726.080 272.979   6
  -7 -17 -11 445.332 216.515   5
   7 -17  11 255.118 181.856   1
   7  17 -13 1339.88 344.378   6
   7 -17  13 842.712 272.895   1
  -7 -17 -13 1037.96 270.897   5
  -7 -17  13 1030.08 268.264   1
   7  17 -15 18515.9 952.100   6
  -7 -17  15 17457.7 902.413   1
   7 -17  15 16347.6 1013.62   1
   7  17 -17 28017.0 1144.70   6
  -7 -17  17 25455.5 1094.22   1
   7 -17  17 25051.6 1280.92   1
   7  17 -19 7310.76 616.657   6
   7  17 -21 453.996 244.538   6
   7  17 -23 3030.70 415.666   6
   7  17 -25 21744.7 1009.16   6
   7  17 -27 816.143 254.827   6
  -7  17 -27 1051.25 232.039   3
   7  17 -29 9075.49 640.214   6
  -7  17 -29 9283.93 585.686   3
  -7  17 -31 31082.4 1020.24   3
  -7  17 -33 20466.7 819.181   3
  -7  17 -35 16980.0 714.738   3
   7  19   1 17963.3 972.414   6
   7  19  -1 17199.5 947.736   6
  -7 -19   1 15582.9 790.018   1
   7  19   3 13654.9 859.331   6
   7  19  -3 12075.1 792.717   6
  -7 -19   3 11310.3 703.942   1
   7 -19   3 12922.9 863.976   1
   7  19   5 1351.30 355.923   6
   7  19  -5 1541.59 342.604   6
  -7 -19   5 784.209 248.512   1
   7 -19   5 742.776 252.603   1
   7  19  -7 974.864 331.938   6
   7 -19   7 665.756 227.059   1
  -7 -19   7 740.052 246.404   1
   7 -19   9 322.019 214.706   1
   7  19  -9 611.202 320.657   6
  -7 -19   9 515.079 235.882   1
  -7 -19  11 9224.61 695.484   1
   7 -19  11 9405.02 777.377   1
   7  19 -13 856.911 312.571   6
  -7 -19  13 673.144 238.152   1
   7 -19  13 449.892 196.011   1
   7  19 -15 29411.9 1182.82   6
   7  19 -17 40402.6 1377.90   6
   7  19 -19 15676.6 873.180   6
   7  19 -21 942.414 286.771   6
   7  19 -23 9177.47 670.731   6
  -7  19 -23 8756.40 568.340   3
   7  19 -25 11556.8 722.853   6
  -7  19 -25 11885.8 653.821   3
   7  19 -27 1683.00 310.288   6
  -7  19 -27 1197.50 235.653   3
   7  19 -29 6318.86 525.559   6
  -7  19 -29 6965.76 497.986   3
  -7  19 -31 15114.6 694.767   3
  -7  19 -33 26091.6 870.970   3
   7  21   1 7649.80 667.194   6
   7  21  -1 7469.56 653.294   6
   7  21   3 11004.3 828.587   6
   7  21  -3 10228.9 753.183   6
   7 -21   3 7933.27 726.121   1
  -7 -21   3 6851.37 606.922   1
  -7 -21   5 1405.14 291.065   1
   7  21   5 1910.52 412.139   6
   7  21  -5 2178.11 398.609   6
   7 -21   5 1322.03 341.452   1
   7  21  -7 873.303 334.585   6
   7  21  -9 36470.7 1363.55   6
   7  21 -11 14579.4 865.668   6
   7  21 -13 319.839 270.573   6
   7  21 -15 25179.5 1099.68   6
   7  21 -17 35437.0 1277.09   6
   7  21 -19 21800.2 1000.07   6
  -7  21 -19 19358.2 816.567   3
   7  21 -21 40.5384 237.661   6
  -7  21 -21 218.056 170.941   3
   7  21 -23 6646.69 547.559   6
  -7  21 -23 6805.52 493.128   3
   7  21 -25 9527.87 638.770   6
  -7  21 -25 9788.14 584.009   3
   7  21 -27 1184.17 264.127   6
  -7  21 -27 1336.42 246.873   3
   7  21 -29 23.6635 149.207   6
  -7  21 -29 71.1026 136.539   3
  -7  21 -31 8368.87 497.528   3
   7  23   1 14577.5 971.097   6
   7  23  -1 14681.0 948.508   6
   7  23  -3 4044.51 540.653   6
   7  23   3 3431.25 547.222   6
   7  23  -5 3063.65 478.254   6
   7  23  -7 19478.9 1041.49   6
   7  23  -9 12529.8 821.828   6
   7  23 -11 12343.0 818.534   6
   7  23 -13 242.372 276.409   6
   7  23 -15 9227.82 678.696   6
   7  23 -17 27008.2 1099.42   6
   7  23 -19 12188.0 741.998   6
  -7  23 -19 10093.6 587.410   3
   7  23 -21-115.381 209.665   6
  -7  23 -21 95.8764 139.335   3
   7  23 -23 5304.73 470.739   6
  -7  23 -23 5213.94 425.225   3
   7  23 -25 8935.90 580.841   6
  -7  23 -25 7251.67 480.638   3
   7  23 -27 4310.10 402.442   6
  -7  23 -27 3897.12 349.930   3
   7  25  -1 6291.10 667.980   6
   7  25   1 6840.52 715.837   6
   7  25   3 2680.34 494.904   6
   7  25  -3 2855.17 467.999   6
   7  25  -5 7097.54 662.365   6
   7  25  -7 11896.7 819.557   6
   7  25  -9 18760.8 969.437   6
   7  25 -11 4826.80 527.163   6
   7  25 -13 873.775 295.385   6
   7  25 -15 4779.07 495.581   6
   7  25 -17 7566.46 572.478   6
   7  25 -19 3647.65 402.912   6
   7  25 -21 933.455 238.799   6
  -7  25 -21 1249.11 269.318   6
   7  25 -23 7755.80 524.690   6
   7  25 -25 7784.72 507.990   6
   7  27   1 1975.16 399.004   6
   7  27  -1 1801.86 382.128   6
   7  27  -3 474.058 272.295   6
   7  27  -5 6046.98 590.128   6
   7  27  -7 20349.0 992.612   6
   7  27  -9 18105.8 914.006   6
   7  27 -11 5835.45 531.085   6
   7  27 -13 334.473 214.962   6
   7  27 -15 593.548 219.474   6
   7  27 -17 1029.00 247.814   6
   7  27 -19-160.190 166.870   6
  -7  27 -19 264.797 173.100   6
   7  27 -21 2744.44 316.471   6
   7  29  -1 1305.34 280.660   6
   7  29  -3 48.3976 184.545   6
   7  29  -5 4047.98 441.548   6
   7  29  -7 11189.2 679.247   6
   7  29  -9 8570.44 584.211   6
   7  29 -11 2181.01 282.332   6
   7  29 -13 15.4379 173.113   6
   7  29 -15 1235.97 225.386   6
   8   0  -2 544468. 3781.65   6
   8   0  -4 224789. 2133.95   2
   8   0  -4 225984. 2446.23   6
   8   0  -6 110854. 1577.98   2
   8   0  -6 108185. 1713.56   6
   8   0  -8 23453.3 765.176   2
   8   0  -8 23954.7 826.083   6
   8   0 -10 606.492 217.075   6
   8   0 -10 363.269 146.153   2
   8   0 -12 88372.2 1591.14   2
   8   0 -12 87703.6 1637.21   6
   8   0 -14 288196. 3006.65   2
   8   0 -14 281613. 2990.96   6
   8   0 -16 147449. 2240.94   2
   8   0 -16 143333. 2164.58   6
   8   0 -18 205153. 2776.16   2
  -8   0 -18 214049. 2568.40   4
   8   0 -18 207321. 2648.50   6
   8   0 -20 76672.3 1640.99   6
  -8   0 -20 76651.1 1704.91   4
   8   0 -22 1678.91 283.090   6
  -8   0 -26 67702.0 1643.58   5
  -8   0 -28 6633.76 549.111   5
  -8   0 -30 102289. 1947.74   5
  -8   0 -32 116829. 2041.26   5
  -8   0 -34 126856. 2136.02   5
  -8   0 -36 69421.8 1555.88   5
  -8   0 -36 70534.7 2050.19   7
   8   2   0 380298. 2530.73   2
   8  -2   0 371428. 3070.55   6
   8   2  -2 166841. 2130.27   6
   8  -2  -2 169523. 2082.46   6
   8   2  -2 165198. 1765.46   2
   8   2  -4 225265. 2476.63   6
   8   2  -4 224248. 2166.07   2
   8  -2  -4 228792. 2419.66   6
   8   2  -6 34616.3 896.639   2
   8   2  -6 36051.1 1004.50   6
   8  -2  -6 35664.4 967.932   6
   8   2  -8 4431.64 355.035   2
   8   2  -8 4475.21 389.417   6
   8  -2  -8 4520.31 379.850   6
   8   2 -10 5119.42 382.124   2
   8   2 -10 4664.77 402.040   6
   8  -2 -10 4915.77 393.705   6
   8   2 -12 36431.9 1075.96   6
   8   2 -12 37820.4 1065.50   2
   8  -2 -12 37300.2 1039.04   6
   8   2 -14 47085.7 1268.05   6
   8   2 -14 47676.9 1249.02   2
   8  -2 -14 47939.6 1217.91   6
  -8   2 -14 44373.5 1155.05   4
  -8  -2 -14 47713.9 1182.08   4
   8   2 -16 170150. 2410.90   6
  -8   2 -16 172425. 2260.26   4
   8   2 -16 175722. 2475.77   2
  -8  -2 -16 172966. 2266.62   4
   8  -2 -16 171924. 2323.60   6
   8   2 -18 98678.4 1871.22   6
   8   2 -18 100417. 1978.11   2
  -8   2 -18 102339. 1788.33   4
  -8  -2 -18 97965.2 1737.24   4
   8  -2 -18 99391.5 1809.60   6
   8   2 -20 37621.2 1256.20   2
  -8   2 -20 39440.2 1168.79   4
  -8  -2 -20 36907.1 1142.05   4
   8  -2 -20 37407.2 1130.38   6
   8   2 -20 38126.3 1184.01   6
   8   2 -22 9100.45 662.462   2
   8  -2 -22 8112.45 560.359   6
   8   2 -22 9392.58 629.323   6
   8   2 -24 326.657 237.507   6
   8   2 -24 102.057 188.205   2
  -8  -2 -26 5876.13 560.955   5
  -8  -2 -28 38366.8 1211.71   5
  -8   2 -28 37399.4 1233.46   5
  -8  -2 -30 25420.2 991.923   5
  -8   2 -30 24468.0 977.694   5
  -8  -2 -32 93995.3 1835.20   5
  -8   2 -32 86615.7 1787.67   5
  -8  -2 -34 71441.0 1634.85   5
  -8   2 -34 71957.2 1599.61   5
  -8  -2 -36 46972.9 1288.58   5
  -8  -2 -38 22217.9 1157.20   7
  -8  -2 -40 2362.13 434.262   7
   8   4   0 21106.0 765.648   6
   8  -4   0 21667.8 730.159   6
   8   4   0 21278.4 615.023   2
   8   4  -2 39984.2 905.852   2
   8   4  -2 39351.2 1044.25   6
   8  -4   2 39344.7 987.593   6
   8  -4  -2 41947.5 1025.06   6
   8   4   2 38712.9 770.660   2
   8   4  -4 596.872 175.857   6
   8   4  -4 520.115 135.772   2
   8  -4   4 618.490 172.229   6
   8  -4  -4 603.345 165.028   6
   8  -4  -6 12173.7 569.632   6
   8   4  -6 11842.6 581.415   6
   8  -4   6 10934.9 518.471   6
   8   4  -6 11754.8 540.524   2
   8   4  -8 15662.8 675.336   6
   8  -4  -8 16099.6 664.735   6
   8   4  -8 15460.8 653.329   2
   8   4 -10 9560.54 552.030   6
   8  -4 -10 10108.1 547.665   6
   8   4 -10 10018.6 540.010   2
   8   4 -12 9540.49 566.963   6
   8  -4 -12 9730.58 543.510   6
   8   4 -12 9453.75 546.928   2
  -8   4 -12 9451.72 530.129   4
   8   4 -14 2474.50 299.347   6
  -8  -4 -14 2454.90 304.260   4
  -8   4 -14 2393.05 298.398   4
   8  -4 -14 2574.51 304.562   6
   8   4 -14 2774.45 316.554   2
   8   4 -16 21750.0 891.803   6
  -8   4 -16 23597.7 844.608   4
   8  -4 -16 22824.9 850.281   6
   8   4 -16 23266.2 921.223   2
   8   4 -18 47680.3 1370.02   2
   8   4 -18 45227.5 1310.37   6
  -8   4 -18 44414.0 1238.09   4
   8  -4 -18 45564.2 1214.62   6
   8   4 -20 341.931 188.226   6
   8   4 -20 274.540 181.421   2
  -8   4 -20 339.149 185.094   4
   8  -4 -20 474.951 200.430   6
   8   4 -22 4609.66 463.669   6
   8   4 -22 4311.92 465.524   2
   8   4 -24 32807.7 1292.10   2
   8   4 -24 33054.3 1168.22   6
   8   4 -26 33977.1 1378.73   2
  -8  -4 -26 37156.6 1199.45   5
  -8  -4 -28 1332.84 314.981   5
  -8   4 -28 1659.03 352.464   5
  -8  -4 -30 16327.9 794.230   5
  -8   4 -30 15477.5 771.508   5
  -8  -4 -32 6083.83 508.010   5
  -8   4 -32 6004.22 485.772   5
  -8  -4 -34 18554.3 854.050   5
  -8   4 -34 21997.2 918.124   3
  -8   4 -36 10609.1 629.487   3
  -8  -4 -36 8893.11 584.663   5
  -8  -4 -40 8880.43 764.242   7
   8   6   0 3306.07 301.528   6
   8   6   0 3533.27 273.609   2
   8  -6   0 3670.46 305.425   6
   8  -6  -2 7586.04 448.587   6
   8   6   2 6461.00 437.532   6
   8   6  -2 6907.77 439.879   6
   8   6  -2 6538.09 394.765   2
   8   6   2 6533.88 349.931   2
   8  -6   2 7407.36 435.060   6
   8   6   4 111133. 1780.49   6
   8   6  -4 120577. 1841.21   6
   8   6  -4 112677. 1621.02   2
   8  -6  -4 118572. 1741.96   6
   8   6  -6 130110. 1936.57   6
   8   6  -6 125300. 1784.21   2
   8  -6  -6 130848. 1839.18   6
   8   6  -8 29569.3 938.732   6
   8   6  -8 29936.0 928.005   2
   8  -6  -8 29958.8 902.016   6
   8   6 -10 117251. 1928.36   6
   8   6 -10 122628. 1973.23   2
   8  -6 -10 121413. 1825.62   6
  -8   6 -10 121147. 1805.43   4
   8   6 -12 85423.9 1682.63   6
   8  -6 -12 85020.4 1578.74   6
   8   6 -12 86570.9 1687.40   2
  -8   6 -12 82598.3 1522.15   4
   8   6 -14 9529.24 583.855   6
   8   6 -14 10943.6 637.483   2
  -8   6 -14 10705.0 570.417   4
   8  -6 -14 10706.8 581.220   6
  -8   6 -16 367.444 171.096   4
   8   6 -16 300.377 218.760   6
   8   6 -16 172.823 159.837   2
   8  -6 -16 403.029 200.115   6
   8   6 -18 2005.95 285.447   6
   8   6 -18 2192.85 316.609   2
   8  -6 -18 2113.20 287.810   6
  -8   6 -18 2181.92 303.466   4
   8   6 -20 1217.31 247.990   6
   8   6 -20 1378.59 309.766   2
  -8  -6 -20 1444.04 306.600   5
   8  -6 -20 1355.76 273.498   6
   8   6 -22 53226.7 1611.36   2
   8   6 -22 54019.7 1493.61   6
  -8  -6 -22 56353.3 1427.59   5
   8   6 -24 111115. 2165.33   6
  -8  -6 -24 114326. 2009.04   5
   8   6 -26 78040.5 1822.10   6
   8   6 -26 78872.8 2151.88   2
  -8  -6 -26 82824.2 1723.18   5
  -8  -6 -28 53197.1 1395.71   5
  -8   6 -28 53110.1 1465.40   5
  -8  -6 -30 335.058 223.058   5
  -8  -6 -32 308.646 215.466   5
  -8  -6 -34 717.223 231.875   5
  -8   6 -34 1303.04 263.925   3
  -8   6 -36 534.340 221.121   3
  -8   6 -38 26257.8 953.886   3
  -8   6 -40 34397.6 1029.51   3
  -8  -6 -40 38452.4 1502.69   7
   8   8   0 3436.72 319.758   6
   8   8   2 36395.9 1020.54   6
   8   8  -2 36723.1 1030.19   6
   8   8  -4 102016. 1716.76   6
   8   8   4 91987.3 1673.27   6
   8   8  -6 127163. 1962.28   6
   8   8   6 115110. 1887.87   6
  -8   8  -8 303663. 2858.85   4
   8   8  -8 303457. 3119.02   2
   8   8  -8 294231. 3025.48   6
   8   8 -10 163036. 2366.66   2
   8   8 -10 160145. 2265.43   6
   8   8 -12 100376. 1851.60   6
   8   8 -12 101354. 1909.04   2
  -8   8 -12 106242. 1720.29   4
  -8   8 -14 17635.6 736.889   4
   8   8 -14 17285.4 805.119   6
   8   8 -14 17304.2 848.485   2
   8   8 -16 18823.4 863.920   6
   8   8 -16 19793.6 921.645   2
  -8   8 -16 18665.1 790.729   4
   8   8 -18 11200.8 683.039   6
  -8  -8 -18 10849.5 636.978   5
  -8   8 -18 11246.5 640.857   4
   8   8 -18 11463.3 737.951   2
   8   8 -20 14911.0 812.409   6
  -8  -8 -20 15226.7 739.247   5
   8   8 -20 15016.6 870.494   2
   8   8 -22 51281.5 1481.99   6
  -8  -8 -22 52356.1 1335.70   5
   8   8 -22 49985.1 1615.63   2
   8   8 -24 121907. 2291.18   6
  -8  -8 -24 127045. 2075.17   5
   8   8 -24 122782. 2610.46   2
   8   8 -26 166896. 2724.30   6
   8   8 -26 165300. 3161.99   2
  -8  -8 -26 170509. 2415.62   5
  -8  -8 -28 78216.7 1697.00   5
  -8  -8 -30 27221.1 1028.50   5
  -8  -8 -32 5041.68 474.715   5
  -8  -8 -34-198.603 239.044   5
  -8   8 -34-262.074 208.984   3
  -8   8 -36 18115.3 817.865   3
  -8   8 -38 39024.9 1150.25   3
  -8   8 -40 70497.7 1464.38   3
  -8  -8 -40 77125.4 2047.24   7
   8  10   0 1519.87 253.995   6
   8  10   2 8263.37 513.769   6
   8  10  -2 8103.09 516.100   6
  -8  10  -4 33064.0 973.386   4
   8  10   4 31518.7 1012.27   6
   8  10  -4 32883.7 1031.74   6
   8  10  -6 155537. 2231.34   6
  -8  10  -6 159988. 2080.23   4
  -8  10  -8 221489. 2494.61   4
   8  10  -8 227538. 2747.27   6
   8  10 -10 178935. 2497.93   6
  -8  10 -10 180272. 2306.39   4
  -8  10 -12 28053.7 924.650   4
   8  10 -12 27814.1 1025.68   6
   8 -10  12 27671.0 1137.30   1
  -8 -10 -12 25759.3 902.240   5
   8  10 -12 27650.2 1084.45   2
   8  10 -14 19030.8 875.858   6
   8 -10  14 20140.6 997.080   1
  -8 -10 -14 18635.8 783.770   5
   8  10 -14 20252.1 953.511   2
  -8  10 -14 19924.0 795.368   4
   8  10 -16 3067.65 390.862   6
   8 -10  16 3137.32 438.351   1
  -8 -10 -16 2811.92 348.426   5
  -8  10 -16 2717.16 335.815   4
   8  10 -16 3830.15 451.610   2
   8  10 -18 2681.97 371.161   6
   8 -10  18 3106.64 456.380   1
  -8 -10 -18 3065.57 349.635   5
   8  10 -18 3585.88 462.550   2
   8  10 -20 29083.2 1126.15   6
  -8 -10 -20 28417.1 984.037   5
   8  10 -20 27897.3 1237.59   2
   8  10 -22 40764.2 1357.97   6
  -8 -10 -22 42052.4 1187.17   5
   8  10 -22 39402.3 1483.03   2
   8  10 -24 57573.9 1616.82   6
  -8 -10 -24 59276.7 1435.35   5
   8  10 -24 57263.8 1834.47   2
   8  10 -26 97699.8 2103.14   6
  -8 -10 -26 98442.8 1869.25   5
   8  10 -28 65563.0 1721.83   6
  -8 -10 -28 70454.6 1615.82   5
  -8 -10 -30 29440.1 1058.41   5
  -8 -10 -32 352.737 232.391   5
  -8  10 -32 451.459 200.961   3
  -8  10 -34 86.0828 167.539   3
  -8  10 -36 2790.63 345.046   3
  -8  10 -38 36610.0 1099.24   3
  -8  12   0 17999.2 726.728   4
   8  12   0 17713.5 783.654   6
   8  12   2 28741.6 984.092   6
   8  12  -2 27943.7 974.722   6
  -8  12  -2 28761.6 903.057   4
   8  12   4 6187.05 475.237   6
   8  12  -4 5672.50 468.008   6
  -8  12  -4 5162.83 419.326   4
   8  12   6 58985.2 1441.83   6
   8  12  -6 60828.4 1481.72   6
  -8  12  -6 60873.5 1334.52   4
   8  12  -8 74053.3 1671.18   6
   8 -12   8 75163.9 1795.45   1
  -8 -12  -8 71962.1 1411.64   5
  -8  12  -8 76143.2 1473.05   4
   8  12 -10 43250.1 1277.71   6
  -8 -12 -10 41233.5 1077.62   5
  -8  12 -10 41854.5 1134.41   4
   8 -12  10 42196.6 1400.62   1
   8  12 -12 6201.37 519.703   6
  -8 -12 -12 5991.32 443.155   5
   8 -12  12 6947.40 615.285   1
  -8  12 -12 6433.52 468.967   4
   8  12 -14 5003.82 478.485   6
   8 -12  14 4643.63 523.445   1
  -8 -12 -14 4503.11 396.389   5
   8  12 -14 5714.46 557.838   2
  -8  12 -14 4795.86 437.503   4
   8  12 -16 3910.51 427.085   6
  -8 -12 -16 3942.69 380.802   5
   8 -12  16 3667.24 482.095   1
   8  12 -16 4347.44 515.646   2
   8  12 -18 335.692 228.854   2
   8  12 -18 48.6683 253.295   6
   8 -12  18 95.1038 222.927   1
  -8 -12 -18 34.0930 191.550   5
   8  12 -20 1323.71 342.525   2
   8  12 -20 1297.62 284.220   6
  -8 -12 -20 993.799 264.062   5
   8 -12  20 1268.86 342.366   1
   8  12 -22 16419.1 869.069   6
  -8 -12 -22 17585.9 784.542   5
   8  12 -22 16065.2 997.056   2
   8  12 -24 12392.1 773.861   6
  -8 -12 -24 12457.5 687.877   5
   8  12 -26 3248.74 421.567   6
  -8 -12 -26 3452.15 401.361   5
   8  12 -28 32982.6 1227.19   6
  -8 -12 -28 34127.0 1130.64   5
  -8 -12 -30 1065.01 289.807   5
  -8  12 -32 8216.06 566.242   3
  -8  12 -34 12051.9 661.145   3
  -8  12 -36 1284.16 255.604   3
  -8  12 -38 4046.95 377.126   3
   8  14   0 164599. 2475.61   6
  -8  14   0 163940. 2188.69   4
   8  14   2 69265.6 1598.75   6
   8  14  -2 65104.0 1575.13   6
  -8  14  -2 66203.4 1394.02   4
   8  14   4 21540.8 908.323   6
   8  14  -4 20055.1 888.586   6
  -8  14  -4 19838.1 767.910   4
  -8  14  -6 559.072 156.686   4
   8  14   6 484.198 218.482   6
   8  14  -6 350.083 230.256   6
   8 -14   6 253.876 173.114   1
   8  14  -8 7645.74 577.228   6
  -8 -14  -8 6489.44 428.861   5
  -8  14  -8 7012.55 485.105   4
   8 -14   8 7194.54 594.428   1
   8 -14  10 2015.59 330.502   1
   8  14 -10 2162.35 353.584   6
  -8 -14 -10 2205.02 278.264   5
  -8  14 -10 2256.71 323.809   4
   8  14 -12 36574.8 1253.22   6
   8 -14  12 34428.0 1375.57   1
  -8 -14 -12 35105.3 1025.12   5
   8  14 -14 23116.9 1028.23   6
   8 -14  14 20919.7 1128.55   1
  -8 -14 -14 21175.4 817.464   5
   8  14 -16 26951.1 1103.78   6
   8 -14  16 26036.7 1288.41   1
  -8 -14 -16 26275.9 908.815   5
   8  14 -16 25653.6 1231.75   2
   8  14 -18 42245.2 1395.35   6
  -8 -14 -18 40187.4 1163.13   5
   8 -14  18 38185.7 1617.07   1
   8  14 -18 39928.5 1549.56   2
   8  14 -20 14230.9 823.648   6
  -8 -14 -20 14127.9 725.943   5
   8 -14  20 11142.3 911.017   1
   8  14 -20 12325.3 886.271   2
   8  14 -22 180.623 211.243   6
  -8 -14 -22 446.136 269.282   5
   8  14 -24-314.303 276.984   6
  -8 -14 -24-77.1874 225.551   5
   8  14 -26 249.963 198.308   6
  -8 -14 -26 442.315 233.001   5
   8  14 -28 13218.8 783.624   6
  -8  14 -30 17520.1 785.406   3
  -8  14 -32 34956.3 1087.07   3
  -8  14 -34 48649.8 1258.36   3
  -8  14 -36 23059.9 847.906   3
   8  16   0 163848. 2632.39   6
   8  16   2 134505. 2415.88   6
   8  16  -2 128401. 2348.17   6
   8  16  -4 52768.3 1510.52   6
  -8  16  -4 52755.7 1286.77   4
   8  16   6 6360.71 550.728   6
   8  16  -6 5755.01 548.316   6
   8 -16   6 4945.64 518.454   1
  -8  16  -6 5463.43 448.667   4
   8  16  -8 7348.72 596.478   6
   8 -16   8 6749.50 622.254   1
   8  16 -10 35425.7 1296.94   6
  -8 -16 -10 33396.6 991.687   5
   8 -16  10 32789.8 1373.17   1
   8  16 -12 20256.4 971.434   6
   8 -16  12 19162.0 1070.09   1
  -8 -16 -12 18911.2 770.715   5
   8  16 -14 55268.8 1607.19   6
   8 -16  14 52112.1 1816.42   1
  -8 -16 -14 53106.7 1281.52   5
   8 -16  16 90124.1 2449.90   1
  -8 -16 -16 88323.4 1682.16   5
   8  16 -18 70144.2 1825.48   6
  -8 -16 -18 69328.6 1496.05   5
  -8 -16 -20 36554.9 1129.79   5
   8  16 -20 38016.3 1337.85   6
   8  16 -22 21474.2 1002.54   6
   8  16 -24-402.514 267.791   6
   8  16 -26 3997.57 458.588   6
   8  16 -28 27797.4 1104.85   6
  -8  16 -28 29676.4 1022.06   3
  -8  16 -30 60226.7 1409.90   3
  -8  16 -32 65269.1 1439.59   3
  -8  16 -34 65185.9 1395.63   3
  -8  16 -36 42697.3 1079.34   3
   8  18   0 75238.7 1914.40   6
   8  18   2 105771. 2301.87   6
   8  18  -2 98297.1 2174.12   6
   8  18   4 31710.5 1275.12   6
   8  18  -4 27629.1 1182.63   6
   8  18  -6 13139.8 833.742   6
   8 -18   8 24780.8 1229.98   1
   8  18  -8 24011.8 1105.97   6
   8  18 -10 1951.57 420.007   6
   8 -18  10 695.100 246.348   1
   8  18 -12 4085.99 500.869   6
  -8 -18  12 3136.07 427.079   1
   8 -18  12 3791.03 515.374   1
   8  18 -14 50701.6 1543.00   6
   8  18 -16 87810.4 2035.85   6
   8  18 -18 64263.9 1732.35   6
   8  18 -20 32244.8 1224.11   6
   8  18 -22 3238.58 411.951   6
   8  18 -24 877.594 285.756   6
   8  18 -26 253.655 215.429   6
  -8  18 -26 715.132 217.648   3
   8  18 -28 5497.01 496.721   6
  -8  18 -28 5514.01 445.481   3
  -8  18 -30 37851.7 1088.03   3
  -8  18 -32 58259.3 1310.64   3
  -8  18 -34 40054.4 1031.13   3
   8  20   0 50573.6 1684.78   6
   8  20   2 6589.09 638.346   6
   8  20  -2 6397.34 610.004   6
   8  20   4 14364.4 936.797   6
   8  20  -4 12611.1 841.716   6
   8  20  -6 15479.0 915.449   6
   8  20  -8 22351.2 1084.74   6
   8  20 -10 12039.9 822.141   6
   8  20 -12 601.990 316.457   6
   8  20 -14 13989.0 841.901   6
   8  20 -16 31838.4 1215.72   6
   8  20 -18 30318.2 1192.70   6
   8  20 -20 5840.65 515.323   6
   8  20 -22-207.759 223.801   6
  -8  20 -22-64.0534 145.461   3
   8  20 -24 5329.77 492.229   6
  -8  20 -24 5018.34 418.000   3
   8  20 -26 5225.75 483.413   6
  -8  20 -26 4750.97 402.892   3
   8  20 -28-120.079 172.887   6
  -8  20 -28 207.668 162.613   3
  -8  20 -30 5043.91 394.665   3
   8  22   0 400.115 255.557   6
   8  22   2 3357.78 475.453   6
   8  22  -2 3630.38 482.602   6
   8  22   4-139.426 256.773   6
   8  22  -4 680.797 298.975   6
   8  22  -6 22103.0 1112.35   6
   8  22  -8 27647.8 1219.64   6
   8  22 -10 34789.9 1350.04   6
   8  22 -12 11054.8 769.365   6
   8  22 -14-277.674 291.560   6
   8  22 -16 2639.66 372.240   6
  -8  22 -16 2440.98 289.460   3
   8  22 -18 3306.02 395.060   6
  -8  22 -18 3454.09 348.095   3
   8  22 -20-492.244 311.025   6
  -8  22 -20-115.527 162.079   3
   8  22 -22 11423.1 686.913   6
  -8  22 -22 11191.7 602.169   3
   8  22 -24 22723.6 922.929   6
  -8  22 -24 21523.6 809.686   3
   8  22 -26 19508.9 830.546   6
  -8  22 -26 18494.3 737.430   3
  -8  22 -28 5508.00 397.109   3
   8  24   0 60.3904 318.405   6
   8  24   2 130.134 260.126   6
   8  24  -2 139.086 263.381   6
   8  24  -4 16168.7 972.889   6
   8  24  -6 44302.1 1535.54   6
   8  24  -8 49108.6 1583.40   6
   8  24 -10 32372.9 1258.69   6
   8  24 -12 23461.5 1049.22   6
   8  24 -14 8886.77 641.694   6
   8  24 -16-347.383 259.798   6
   8  24 -18-302.913 245.693   6
   8  24 -20 8291.10 572.669   6
   8  24 -22 24079.4 923.807   6
   8  24 -24 36716.5 1081.77   6
   8  26   0-71.5193 264.380   6
   8  26  -2 4068.27 507.865   6
   8  26  -4 11791.4 819.245   6
   8  26  -6 34638.5 1318.44   6
   8  26  -8 50233.8 1534.39   6
   8  26 -10 28823.7 1136.97   6
   8  26 -12 10982.6 692.845   6
   8  26 -14 4114.99 425.883   6
   8  26 -16 1182.39 255.049   6
   8  26 -18 2328.68 310.905   6
   8  26 -20 8068.77 519.320   6
   8  28  -2 540.559 247.902   6
   8  28  -4 1796.21 329.130   6
   8  28  -6 9976.06 657.741   6
   8  28  -8 15746.7 802.813   6
   8  28 -10 9287.17 600.319   6
   8  28 -12 1603.22 273.512   6
   8  28 -14-48.1215 158.452   6
   8  28 -16-354.864 180.135   6
   9  -1   1 318354. 3055.41   6
   9  -1  -1 315645. 3050.23   6
   9   1   1 319563. 3085.09   6
   9   1  -1 312647. 3084.26   6
   9  -1   3 238997. 2651.52   6
   9  -1  -3 242851. 2707.35   6
   9   1   3 244236. 2685.17   6
   9   1  -3 248369. 2743.91   6
   9   1  -5 159643. 2214.77   6
   9   1  -5 154191. 1979.32   2
   9  -1   5 151519. 2091.96   6
   9   1   5 155332. 2152.94   6
   9  -1  -5 156665. 2192.62   6
   9   1  -7 38688.4 1033.11   2
   9  -1   7 35496.6 1019.83   6
   9   1   7 35275.2 1044.81   6
   9  -1  -7 39588.3 1095.07   6
   9   1  -7 38295.8 1106.94   6
   9   1  -9 25179.3 863.992   2
   9  -1   9 20425.4 801.726   6
   9   1   9 21284.1 798.441   6
   9  -1  -9 25336.9 908.411   6
   9   1  -9 25114.3 912.575   6
   9   1 -11 103646. 1823.44   2
   9  -1 -11 104878. 1848.37   6
   9   1 -11 104142. 1873.63   6
   9   1 -13 135944. 2193.64   2
   9  -1 -13 131725. 2120.47   6
  -9   1 -13 129015. 2028.96   4
   9   1 -13 135275. 2168.90   6
  -9  -1 -13 134037. 2096.90   4
   9   1 -15 152802. 2411.50   2
  -9   1 -15 149773. 2191.01   4
  -9  -1 -15 143762. 2169.26   4
   9  -1 -15 146006. 2266.55   6
   9   1 -15 149191. 2311.82   6
   9   1 -17 182566. 2750.61   2
  -9   1 -17 185237. 2455.64   4
  -9  -1 -17 182477. 2442.62   4
   9  -1 -17 181989. 2562.68   6
   9   1 -17 181172. 2597.26   6
  -9   1 -19 102447. 1884.44   4
  -9  -1 -19 96382.7 1873.93   4
   9  -1 -19 100660. 1941.61   6
   9   1 -19 102058. 1979.13   6
  -9  -1 -21 40182.4 1223.62   4
  -9   1 -21 38957.0 1229.39   4
   9  -1 -21 37089.3 1204.40   6
   9   1 -21 37365.8 1220.66   6
   9  -1 -23 23164.8 963.301   6
   9   1 -23 24680.3 1011.92   6
  -9  -1 -27 18959.9 911.184   5
  -9   1 -27 19298.5 919.061   5
  -9  -1 -29 71296.7 1666.93   5
  -9   1 -29 70135.6 1676.75   5
  -9  -1 -31 148977. 2330.24   5
  -9   1 -31 145215. 2296.54   5
  -9  -1 -33 160275. 2410.98   5
  -9   1 -33 166698. 2404.99   5
  -9  -1 -35 113619. 1989.43   5
  -9   1 -35 116178. 1990.64   5
  -9  -1 -37 56702.0 1379.55   5
  -9   1 -37 48505.1 1261.36   5
   9  -3  -1 122096. 1874.83   6
   9   3  -1 121942. 1958.29   6
   9  -3   1 121141. 1845.25   6
   9   3   1 122691. 1944.26   6
   9   3  -3 45410.0 1202.20   6
   9   3  -3 43987.1 1016.23   2
   9  -3  -3 46072.1 1175.19   6
   9  -3   3 45531.2 1146.41   6
   9   3   3 45561.1 1211.35   6
   9   3  -5 13712.4 680.457   6
   9   3  -5 13424.7 590.544   2
   9  -3   5 12966.0 623.009   6
   9  -3  -5 13013.6 639.331   6
   9   3   5 12906.7 664.845   6
   9  -3  -7 1628.02 258.747   6
   9   3   7 1368.43 248.589   6
   9   3  -7 1659.41 290.446   6
   9   3  -7 1635.32 230.430   2
   9  -3   7 1650.83 255.762   6
   9  -3  -9 2450.23 308.467   6
   9   3  -9 2649.42 345.129   6
   9   3  -9 2204.22 281.612   2
  -9   3 -11 9646.61 580.370   4
   9   3 -11 9369.56 596.043   6
   9   3 -11 9480.59 579.257   2
   9  -3 -11 9398.85 572.901   6
  -9  -3 -13 15486.7 756.575   4
   9   3 -13 17369.3 812.273   6
   9   3 -13 16634.7 784.830   2
   9  -3 -13 17017.8 773.517   6
  -9   3 -13 17499.0 754.988   4
   9   3 -15 50239.6 1387.50   6
   9   3 -15 50626.9 1411.87   2
   9  -3 -15 48546.5 1303.31   6
  -9   3 -15 48022.6 1280.28   4
  -9  -3 -15 47435.6 1274.78   4
   9   3 -17 62654.6 1571.68   6
   9   3 -17 61415.2 1641.35   2
  -9  -3 -17 60461.5 1406.98   4
   9  -3 -17 60819.5 1465.49   6
   9   3 -19 55587.9 1604.75   2
  -9   3 -19 57164.3 1443.17   4
  -9  -3 -19 56489.5 1383.23   4
   9  -3 -19 55161.3 1412.90   6
   9   3 -19 56008.5 1503.50   6
   9   3 -21 2393.57 372.809   6
   9   3 -21 2266.84 376.765   2
   9  -3 -21 2486.38 344.741   6
  -9   3 -21 2291.33 336.066   4
  -9  -3 -21 1995.51 304.030   4
   9   3 -23 2810.47 415.766   2
   9  -3 -23 2731.71 357.823   6
   9   3 -23 3101.12 404.273   6
   9   3 -25 899.971 271.664   6
  -9  -3 -25 1424.12 393.500   5
  -9  -3 -27 645.953 296.459   5
  -9  -3 -29 2263.33 365.699   5
  -9   3 -29 1778.55 341.433   5
  -9  -3 -31 36928.8 1180.65   5
  -9   3 -31 35170.4 1156.13   5
  -9  -3 -33 53618.7 1418.60   5
  -9   3 -33 54050.2 1375.26   5
  -9  -3 -35 53472.2 1372.91   5
  -9   3 -35 54938.6 1360.20   3
  -9  -3 -37 13407.8 684.230   5
  -9  -3 -37 13532.6 947.792   7
   9  -5   1 9186.01 522.552   6
   9   5   1 9241.58 548.417   6
   9   5  -1 8643.18 537.931   6
   9  -5  -1 9090.73 520.617   6
   9   5  -1 7569.46 415.298   2
   9   5   3 185.558 167.504   6
   9   5  -3-35.6714 187.954   6
   9   5  -3 124.129 94.8608   2
   9  -5   3 5.51266 141.605   6
   9  -5  -3 30.4305 167.194   6
   9   5  -5 44195.1 1185.22   6
   9  -5  -5 45066.2 1159.74   6
   9   5  -5 44585.8 1100.52   2
   9   5   5 43798.0 1221.74   6
   9   5  -7 89916.7 1700.21   6
   9   5  -7 87186.6 1603.68   2
   9   5   7 86486.2 1698.67   6
   9   5  -9 87042.3 1697.76   6
   9  -5  -9 85884.1 1637.28   6
   9   5  -9 83613.9 1649.60   2
   9   5 -11 73201.6 1594.23   6
  -9   5 -11 74269.8 1498.70   4
   9  -5 -11 72563.7 1516.87   6
   9   5 -11 70472.6 1560.19   2
   9   5 -13 37718.6 1183.81   6
  -9   5 -13 36073.2 1113.09   4
   9   5 -13 37308.2 1203.67   2
   9  -5 -13 38379.4 1124.79   6
   9   5 -15 2476.89 352.607   6
  -9   5 -15 2665.78 339.787   4
  -9  -5 -15 2435.27 318.770   4
   9  -5 -15 2224.36 316.384   6
   9   5 -15 2673.44 370.419   2
   9   5 -17 2646.77 367.621   2
   9   5 -17 2438.80 365.175   6
  -9   5 -17 2992.40 370.061   4
   9  -5 -17 2474.78 328.090   6
   9   5 -19-30.1900 218.062   6
   9   5 -19-92.0744 198.053   2
   9  -5 -19 100.618 181.369   6
  -9   5 -19 118.319 193.484   4
   9   5 -21 1498.43 326.363   6
   9   5 -21 1333.08 279.741   2
   9  -5 -21 1429.44 281.076   6
   9   5 -23 48707.3 1658.23   2
  -9  -5 -23 52295.9 1449.92   5
   9   5 -23 50624.6 1479.83   6
   9   5 -25 90837.4 2300.84   2
   9   5 -25 96009.9 2038.34   6
  -9  -5 -27 45417.7 1326.15   5
  -9  -5 -29 5364.27 492.271   5
  -9   5 -29 4916.25 478.958   5
  -9  -5 -31 3623.79 410.675   5
  -9   5 -31 2681.32 354.805   5
  -9  -5 -33 950.348 255.833   5
  -9   5 -33 1906.24 328.240   3
  -9  -5 -35 231.926 210.691   5
  -9   5 -35 562.866 225.480   3
  -9   5 -37 1180.52 244.267   3
  -9  -5 -39 7530.59 688.853   7
   9   7   1 3173.59 338.209   6
   9   7  -1 2971.38 320.573   6
   9   7  -1 3032.57 287.402   2
   9   7   3 31676.0 1028.87   6
   9   7  -3 31160.6 995.178   6
   9  -7  -3 32579.1 972.730   6
   9   7  -3 31032.1 933.854   2
   9   7  -5 140421. 2059.62   2
   9   7   5 142842. 2188.68   6
   9  -7  -5 139934. 2006.62   6
   9   7  -7 242591. 2813.14   6
   9   7  -7 238689. 2784.27   2
   9   7  -9 201353. 2604.01   6
   9  -7  -9 204354. 2488.65   6
   9   7  -9 196708. 2608.02   2
  -9   7  -9 195457. 2473.83   4
   9   7 -11 132020. 2180.06   6
   9  -7 -11 139181. 2081.08   6
   9   7 -11 137685. 2269.67   2
  -9   7 -11 135067. 2054.25   4
   9   7 -13 66651.5 1608.90   6
   9  -7 -13 68194.8 1496.84   6
  -9   7 -13 67393.7 1464.38   4
   9   7 -13 67076.7 1672.63   2
   9   7 -15 29780.2 1093.88   6
   9  -7 -15 29502.0 1002.16   6
  -9   7 -15 30794.2 1008.17   4
   9   7 -15 30505.0 1158.38   2
   9   7 -17 3040.62 398.680   6
  -9   7 -17 3589.18 386.567   4
   9   7 -17 2965.42 387.795   2
   9   7 -19 11538.8 723.552   6
  -9  -7 -19 11759.1 688.693   5
  -9   7 -19 11380.9 677.603   4
   9   7 -19 11248.5 768.374   2
   9   7 -21 40069.2 1493.11   2
   9   7 -21 40640.6 1335.07   6
  -9  -7 -21 41434.1 1244.82   5
   9   7 -23 76297.9 1880.58   6
   9   7 -23 76635.5 2115.53   2
  -9  -7 -23 79510.2 1706.51   5
   9   7 -25 202815. 3024.68   6
  -9  -7 -25 210744. 2748.71   5
  -9  -7 -27 149443. 2318.43   5
   9   7 -27 145260. 2538.38   6
  -9  -7 -29 45405.0 1307.71   5
  -9   7 -29 42147.2 1305.20   5
  -9  -7 -31 18879.8 852.947   5
  -9  -7 -33 16704.0 794.938   5
  -9   7 -33 16753.7 804.908   3
  -9  -7 -35 7216.18 523.162   5
  -9   7 -35 7614.34 529.523   3
  -9   7 -37 21283.7 840.037   3
  -9   7 -39 47132.4 1176.50   3
  -9  -7 -39 48145.0 1601.50   7
   9   9   1 26672.7 930.167   6
   9   9  -1 24983.4 907.207   6
   9   9  -1 23620.8 826.619   2
   9   9   3 54658.0 1333.40   6
   9   9  -3 51352.8 1300.42   6
   9   9  -3 50698.7 1248.04   2
   9   9   5 113964. 1996.97   6
   9   9  -5 108804. 1931.33   6
   9   9  -5 109056. 1920.56   2
   9   9   7 159979. 2422.08   6
   9   9  -7 157904. 2342.86   6
   9   9  -7 156295. 2372.28   2
  -9   9  -7 165149. 2216.17   4
   9   9  -9 250751. 3000.86   6
   9   9  -9 244792. 3029.60   2
  -9   9  -9 254459. 2774.62   4
   9   9 -11 164032. 2465.73   6
   9   9 -11 163947. 2621.69   2
  -9   9 -11 166483. 2294.58   4
   9   9 -13 57769.8 1514.19   6
  -9   9 -13 57923.1 1389.83   4
   9   9 -13 57459.5 1611.35   2
   9   9 -15 14271.7 780.633   6
  -9  -9 -15 13556.2 705.751   5
  -9   9 -15 13448.3 694.625   4
   9   9 -15 13496.4 812.658   2
   9   9 -17 20174.6 949.688   6
  -9  -9 -17 19663.7 835.094   5
  -9   9 -17 22379.6 914.366   4
   9   9 -17 19646.7 1020.02   2
   9   9 -19 13237.1 788.946   6
  -9  -9 -19 13236.7 706.760   5
   9   9 -19 13303.6 862.598   2
   9   9 -21 77552.6 1887.11   6
  -9  -9 -21 77626.5 1656.41   5
   9   9 -21 78793.7 2138.19   2
   9   9 -23 148522. 2587.30   6
  -9  -9 -23 148446. 2280.93   5
   9   9 -25 102070. 2159.19   6
  -9  -9 -25 104620. 1905.61   5
   9   9 -27 127761. 2441.38   6
  -9  -9 -27 130063. 2163.22   5
  -9  -9 -29 99917.0 1927.07   5
  -9  -9 -31 16649.3 813.868   5
  -9  -9 -33 2396.67 346.831   5
  -9   9 -33 2854.10 352.166   3
  -9   9 -35 11009.0 636.159   3
  -9   9 -37 32657.5 1044.77   3
   9  11   1 2310.22 317.198   6
   9  11  -1 2513.96 306.577   6
   9  11   3 19541.4 860.868   6
   9  11  -3 19289.0 828.146   6
  -9  11  -3 18525.9 787.910   4
   9  11   5 19461.7 839.684   6
   9  11  -5 17914.1 825.786   6
  -9  11  -5 18361.7 760.558   4
   9  11  -7 64597.8 1561.92   6
   9  11  -7 65156.9 1633.41   2
  -9  11  -7 68874.7 1448.59   4
   9  11  -9 120010. 2155.05   6
  -9 -11  -9 116229. 1886.12   5
   9  11  -9 117096. 2270.98   2
  -9  11  -9 121018. 1963.36   4
   9  11 -11 57851.9 1505.25   6
  -9 -11 -11 56213.0 1336.73   5
   9  11 -11 57384.2 1625.43   2
  -9  11 -11 60836.6 1393.25   4
   9  11 -13 1469.46 291.848   6
  -9 -11 -13 1507.69 267.812   5
  -9  11 -13 1968.29 310.355   4
   9  11 -15 2913.16 390.108   6
  -9 -11 -15 3276.93 370.695   5
  -9  11 -15 3348.54 396.845   4
   9  11 -15 3961.94 498.334   2
   9  11 -17 78.2698 182.739   2
   9  11 -17-271.274 268.878   6
  -9 -11 -17 120.518 199.181   5
   9  11 -19 8416.83 660.486   6
  -9 -11 -19 8029.08 541.518   5
   9  11 -19 8568.46 735.909   2
   9  11 -21 39918.0 1363.83   6
  -9 -11 -21 38666.8 1167.56   5
   9  11 -21 37375.4 1538.45   2
   9  11 -23 61028.5 1679.00   6
  -9 -11 -23 64404.7 1493.36   5
   9  11 -25 47328.8 1484.80   6
  -9 -11 -25 48438.9 1341.79   5
   9  11 -27 40525.2 1401.17   6
  -9 -11 -27 43440.7 1282.26   5
  -9 -11 -29 22887.6 931.733   5
  -9 -11 -31 191.432 238.800   5
  -9  11 -33 3823.85 402.684   3
  -9  11 -35-30.3432 144.374   3
  -9  11 -37 9178.69 546.583   3
   9  13   1 46226.8 1316.62   6
   9  13  -1 44144.5 1286.07   6
  -9  13  -1 45729.9 1202.16   4
  -9  13   1 45812.8 1196.21   4
   9  13   3 34489.2 1148.56   6
   9  13  -3 31630.3 1104.75   6
  -9  13  -3 31617.6 1026.93   4
  -9  13  -5 789.565 225.130   4
   9  13   5 998.865 260.278   6
   9  13  -5 831.969 253.963   6
   9  13  -7 4523.64 464.039   6
  -9 -13  -7 4080.16 361.091   5
  -9  13  -7 4285.47 408.870   4
  -9  13  -9 226.334 191.044   4
   9  13  -9 49.2691 218.484   6
  -9 -13  -9 190.807 165.763   5
   9  13 -11 10212.5 672.328   6
  -9 -13 -11 9336.28 544.619   5
   9  13 -11 9791.68 762.108   2
  -9  13 -11 9365.96 605.416   4
   9  13 -13 1463.05 363.345   2
   9  13 -13 1372.62 315.789   6
  -9  13 -13 1573.92 293.883   4
  -9 -13 -13 1418.41 257.833   5
   9  13 -15 32128.9 1196.47   6
  -9 -13 -15 29798.6 971.433   5
   9  13 -15 31074.3 1321.40   2
   9  13 -17 29819.1 1181.14   6
  -9 -13 -17 28831.0 965.176   5
   9  13 -17 28624.9 1343.77   2
   9  13 -19 14707.0 852.877   6
  -9 -13 -19 15099.1 728.193   5
   9  13 -21 3022.88 452.507   6
  -9 -13 -21 2819.21 367.195   5
   9  13 -23 429.354 256.526   6
  -9 -13 -23 601.188 269.398   5
   9  13 -25 11707.4 758.049   6
  -9 -13 -25 11608.8 680.832   5
   9  13 -27 647.561 253.940   6
  -9 -13 -27 576.737 252.789   5
   9  13 -29 15321.8 858.470   6
  -9 -13 -29 18993.6 843.857   5
  -9  13 -31 29581.0 1006.07   3
  -9  13 -33 35281.1 1067.77   3
  -9  13 -35 26527.9 915.341   3
  -9  13 -37 7049.15 465.372   3
   9  15   1 177134. 2727.58   6
   9  15  -1 171787. 2676.41   6
  -9  15  -1 173803. 2335.78   4
  -9  15   1 167031. 2317.16   4
   9  15  -3 126069. 2316.42   6
  -9  15  -3 130735. 2047.05   4
   9  15  -5 24944.5 1043.04   6
  -9  15  -5 23584.7 897.876   4
   9  15  -7 15450.2 834.989   6
  -9  15  -7 14819.7 718.599   4
   9  15  -9 49932.7 1485.66   6
  -9  15  -9 52087.4 1356.32   4
   9  15 -11 10686.0 721.488   6
  -9 -15 -11 10322.8 573.020   5
   9  15 -13 48699.0 1504.47   6
  -9 -15 -13 48434.7 1215.77   5
   9  15 -13 47077.8 1693.71   2
   9  15 -15 89188.1 2021.88   6
  -9 -15 -15 86697.7 1634.94   5
   9  15 -17 121436. 2351.94   6
  -9 -15 -17 115623. 1938.43   5
   9  15 -19 82849.9 1949.28   6
  -9 -15 -19 80284.9 1630.03   5
   9  15 -21 53854.2 1582.09   6
  -9 -15 -21 50132.3 1323.36   5
   9  15 -23 7195.37 618.212   6
  -9 -15 -23 7588.54 547.724   5
   9  15 -25 2352.09 364.999   6
  -9 -15 -25 2843.90 373.102   5
   9  15 -27 17301.4 883.686   6
   9  15 -29 41727.5 1320.95   6
  -9  15 -29 44491.7 1208.06   3
  -9  15 -31 79323.0 1578.38   3
  -9  15 -33 86191.7 1599.42   3
  -9  15 -35 74592.3 1444.42   3
   9  17   1 178858. 2879.84   6
   9  17  -1 176137. 2867.69   6
   9  17  -3 66314.6 1770.66   6
  -9  17  -3 66747.0 1531.23   4
   9  17  -5 65804.6 1768.82   6
  -9  17  -5 67939.7 1554.57   4
   9  17  -7 36484.2 1317.58   6
   9  17  -9 6.58172 262.044   6
   9  17 -11 9189.86 681.293   6
   9  17 -13 43803.2 1425.89   6
  -9 -17 -13 39323.6 1110.86   5
   9  17 -15 96004.2 2098.00   6
  -9 -17 -15 87708.3 1654.20   5
   9  17 -17 106985. 2256.49   6
  -9 -17 -17 101325. 1796.24   5
   9  17 -19 90624.0 2053.86   6
   9  17 -21 33184.9 1258.40   6
   9  17 -23 9970.71 689.910   6
   9  17 -25 6474.52 551.420   6
   9  17 -27 8394.73 617.829   6
  -9  17 -27 9460.20 563.619   3
   9  17 -29 22180.4 948.711   6
  -9  17 -29 26449.6 913.692   3
  -9  17 -31 54915.0 1276.32   3
  -9  17 -33 81343.4 1494.04   3
   9  19   1 50251.2 1625.54   6
   9  19  -1 48869.2 1596.41   6
   9  19   3 47087.3 1599.55   6
   9  19  -3 43203.6 1492.56   6
   9  19  -5 13705.0 854.208   6
   9  19  -7 147.690 241.843   6
   9  19  -9 5122.51 531.352   6
   9  19 -11 117.307 241.970   6
   9  19 -13 10976.6 732.994   6
   9  19 -15 33987.8 1258.93   6
   9  19 -17 40288.7 1375.03   6
   9  19 -19 31718.8 1204.05   6
   9  19 -21 6780.03 571.572   6
   9  19 -23 220.428 200.632   6
   9  19 -25 547.317 225.749   6
  -9  19 -25 566.301 182.674   3
   9  19 -27 249.423 182.869   6
  -9  19 -27 396.286 172.295   3
   9  19 -29 1670.54 273.647   6
  -9  19 -29 1926.58 263.270   3
  -9  19 -31 18537.8 708.284   3
   9  21   1 5406.11 586.385   6
   9  21  -1 5621.98 580.019   6
   9  21   3 1932.06 364.802   6
   9  21  -3 1756.80 357.619   6
   9  21  -5 6049.89 602.481   6
   9  21  -7 29382.0 1249.86   6
   9  21  -9 16783.8 943.306   6
   9  21 -11 10848.7 751.243   6
   9  21 -13 357.053 271.048   6
   9  21 -15 102.088 267.992   6
   9  21 -17 5031.52 472.832   6
   9  21 -19-735.313 307.745   6
   9  21 -21 2508.59 353.551   6
  -9  21 -21 2478.80 293.715   3
   9  21 -23 12571.2 699.068   6
  -9  21 -23 11713.9 597.990   3
   9  21 -25 19468.2 835.016   6
  -9  21 -25 18512.0 732.770   3
   9  21 -27 15217.9 714.594   6
  -9  21 -27 16205.0 673.767   3
   9  23   1 1000.97 319.988   6
   9  23  -1 634.170 286.826   6
   9  23   3 9883.81 819.056   6
   9  23  -3 9616.64 764.393   6
   9  23  -5 35916.8 1395.01   6
   9  23  -7 47184.6 1561.95   6
   9  23  -9 58303.8 1711.46   6
   9  23 -11 24400.2 1080.85   6
   9  23 -13 17234.4 894.212   6
   9  23 -15 1858.66 318.077   6
   9  23 -17 810.722 207.175   6
   9  23 -19 5567.34 490.825   6
   9  23 -21 21274.0 880.962   6
  -9  23 -21 15918.5 668.529   3
   9  23 -23 42794.7 1195.82   6
  -9  23 -23 30518.9 905.185   3
   9  25   1 8162.82 739.787   6
   9  25  -1 8041.22 705.471   6
   9  25  -3 16000.2 946.359   6
   9  25  -5 32179.0 1281.77   6
   9  25  -7 62841.1 1745.88   6
   9  25  -9 50403.4 1524.51   6
   9  25 -11 43708.1 1376.99   6
   9  25 -13 12969.3 734.843   6
   9  25 -15 6652.75 519.780   6
   9  25 -17 6532.46 497.285   6
   9  25 -19 11076.4 619.463   6
   9  25 -21 24047.6 857.598   6
   9  27  -1-169.693 246.544   6
   9  27  -3 1220.35 282.032   6
   9  27  -5 13859.5 807.478   6
   9  27  -7 18931.0 914.387   6
   9  27  -9 21949.1 941.108   6
   9  27 -11 11317.0 659.865   6
   9  27 -13 4275.47 404.633   6
   9  27 -15 517.903 187.531   6
  10   0   0 315056. 3259.82   6
  10   0   2 151956. 2261.41   6
  10   0  -2 151373. 2268.84   6
  10   0   4 66878.8 1511.14   6
  10   0  -4 68812.3 1530.86   6
  10   0   6 56572.8 1384.38   6
  10   0  -6 57860.8 1417.70   6
  10   0   8 14521.7 715.557   6
  10   0  -8 15362.9 751.782   6
  10   0 -10 75302.6 1661.89   6
  10   0  10 65154.5 1479.44   6
 -10   0 -12 61790.0 1476.93   4
  10   0 -12 63584.9 1539.45   6
  10   0 -14 84073.5 1804.12   6
 -10   0 -14 83377.8 1708.83   4
 -10   0 -16 70455.8 1585.60   4
  10   0 -16 71291.6 1682.05   6
 -10   0 -18 130747. 2172.06   4
  10   0 -18 131429. 2315.08   6
 -10   0 -20 7948.27 568.093   4
  10   0 -20 8432.17 622.561   6
  10   0 -22 48102.2 1434.77   6
  10   0 -24 1589.28 297.977   6
 -10   0 -26 558.713 294.893   5
 -10   0 -28 30288.9 1124.52   5
 -10   0 -30 67531.9 1623.20   5
 -10   0 -32 118367. 2037.26   5
 -10   0 -34 94862.7 1790.27   5
 -10   0 -36 67906.9 1466.02   5
  10  -2   0 152647. 2224.22   6
  10   2   0 152724. 2282.28   6
  10  -2   2 131755. 2047.55   6
  10  -2  -2 132849. 2107.32   6
  10   2   2 132073. 2109.38   6
  10   2  -2 132370. 2130.06   6
  10  -2  -4 38766.2 1149.21   6
  10   2   4 35664.2 1136.23   6
  10  -2   4 36326.8 1091.71   6
  10   2  -4 37725.6 1150.41   6
  10  -2  -6 1184.10 254.994   6
  10   2   6 1575.80 267.158   6
  10  -2   6 1425.29 272.204   6
  10   2  -6 1341.42 279.004   6
  10   2  -8 8226.40 546.879   2
  10  -2   8 9003.56 565.457   6
  10   2   8 8539.16 587.688   6
  10  -2  -8 9493.81 592.816   6
  10   2  -8 8616.52 588.992   6
  10  -2 -10 254.376 225.671   6
  10   2 -10 774.827 275.561   6
  10   2 -10 599.201 189.436   2
  10   2 -12 18147.8 864.599   2
  10  -2 -12 17772.1 827.595   6
  10   2 -12 17756.4 866.907   6
 -10   2 -12 17752.0 814.577   4
  10   2 -14 39079.4 1303.47   2
  10  -2 -14 40094.7 1246.74   6
 -10   2 -14 35532.7 1179.08   4
 -10  -2 -14 38248.8 1162.46   4
  10   2 -14 39909.0 1272.73   6
 -10   2 -16 83328.9 1729.28   4
  10  -2 -16 82332.0 1782.44   6
 -10  -2 -16 77952.1 1700.42   4
  10   2 -16 84920.8 1862.23   6
 -10   2 -18 24177.0 954.875   4
 -10  -2 -18 21538.0 917.348   4
  10  -2 -18 21871.1 946.656   6
  10   2 -18 23247.2 1011.28   6
 -10   2 -20 50496.0 1439.77   4
 -10  -2 -20 53108.7 1417.56   4
  10  -2 -20 52775.2 1452.99   6
  10   2 -20 51715.0 1489.99   6
  10   2 -22 1097.34 280.333   6
  10  -2 -22 1069.71 270.983   6
  10   2 -24 1130.38 273.385   6
  10  -2 -24 1062.72 259.273   6
 -10  -2 -26 4896.42 515.822   5
  10   2 -26 4418.35 466.549   6
 -10  -2 -28 1232.68 322.282   5
 -10   2 -28 1176.23 323.550   5
 -10  -2 -30 36651.0 1191.05   5
 -10   2 -30 34505.0 1158.72   5
 -10  -2 -32 65475.7 1519.80   5
 -10   2 -32 59154.5 1472.11   5
 -10  -2 -34 72605.8 1593.23   5
 -10   2 -34 72038.1 1555.97   5
 -10  -2 -36 30755.4 1015.58   5
 -10   2 -36 26904.2 928.538   5
  10  -4   0 48962.9 1263.30   6
  10   4   0 47915.9 1302.07   6
  10   4  -2 29112.6 1019.27   6
  10  -4   2 29175.0 988.720   6
  10  -4  -2 30092.1 999.162   6
  10   4   2 30268.5 1037.92   6
  10   4   4 100.274 169.279   6
  10   4  -4 169.291 184.079   6
  10   4  -4-13.1255 101.288   2
  10  -4   4 61.2520 160.877   6
  10  -4  -4 1.08330 188.602   6
  10   4  -6 13837.2 727.172   6
  10   4  -6 13169.8 654.522   2
  10  -4  -6 14233.8 695.878   6
  10   4   6 14193.4 730.714   6
  10   4  -8 68472.9 1596.78   6
  10   4  -8 65360.5 1505.58   2
  10  -4  -8 69219.4 1547.26   6
  10   4   8 65735.4 1558.75   6
  10   4 -10 46304.0 1333.61   6
 -10   4 -10 45086.4 1247.78   4
  10   4 -10 44585.6 1296.76   2
  10  -4 -10 44939.3 1275.79   6
  10   4 -12 5858.95 526.813   6
  10   4 -12 5270.31 482.162   2
  10  -4 -12 5587.31 499.134   6
 -10   4 -12 5591.25 473.331   4
  10   4 -14 9915.60 667.028   6
  10   4 -14 9575.91 663.780   2
  10  -4 -14 9740.61 625.323   6
 -10   4 -14 9848.51 617.609   4
 -10  -4 -14 8468.95 582.612   4
  10   4 -16 5574.27 534.077   2
 -10   4 -16 6412.08 513.197   4
  10  -4 -16 5546.10 484.121   6
 -10  -4 -16 4913.69 468.199   4
  10   4 -16 5836.25 538.523   6
  10   4 -18 21771.0 1074.16   2
 -10   4 -18 21125.1 939.232   4
 -10  -4 -18 19222.4 855.022   4
  10  -4 -18 21585.8 920.732   6
  10   4 -18 22200.5 1004.55   6
  10   4 -20 74.7672 223.497   6
  10   4 -20 154.193 199.695   2
 -10   4 -20 91.3080 201.661   4
  10  -4 -20 345.546 226.167   6
  10   4 -22 266.177 218.105   6
  10   4 -22 296.873 192.685   2
  10  -4 -22 740.113 252.480   6
 -10  -4 -24 31451.5 1165.22   5
  10   4 -24 29755.5 1166.13   6
 -10  -4 -26 17788.5 865.752   5
  10   4 -26 16851.3 879.921   6
 -10  -4 -28 25285.6 1004.59   5
 -10   4 -28 23868.9 1015.64   5
 -10  -4 -30 667.854 297.329   5
 -10   4 -30-9.05564 254.582   5
 -10  -4 -32 10006.0 648.689   5
 -10   4 -32 9197.07 583.731   5
 -10  -4 -34 14907.6 744.594   5
 -10   4 -34 16915.6 755.348   3
 -10  -4 -36 4990.72 443.572   5
  10   6   0 14806.7 749.096   6
  10  -6   0 16765.2 744.168   6
  10   6   2 268.211 192.823   6
  10   6  -2-7.11738 185.339   6
  10  -6  -2 379.825 204.638   6
  10   6  -4 8094.66 564.403   6
  10  -6  -4 8388.16 542.835   6
  10   6  -4 6890.14 469.442   2
  10   6   4 8333.79 570.410   6
  10   6  -6 87811.3 1789.58   6
  10  -6  -6 93855.5 1770.48   6
  10   6   6 96418.9 1901.73   6
  10   6  -6 86072.7 1701.85   2
  10   6  -8 205062. 2740.24   6
  10   6   8 198214. 2762.46   6
  10   6  -8 198868. 2683.03   2
  10   6 -10 105071. 2010.69   6
  10  -6 -10 112469. 1984.46   6
 -10   6 -10 110531. 1919.60   4
  10   6 -10 102768. 2021.23   2
  10   6 -12 30678.9 1119.03   6
  10  -6 -12 31118.8 1066.66   6
 -10   6 -12 30852.0 1032.63   4
  10   6 -12 29121.3 1121.82   2
  10   6 -14 3593.26 429.038   2
  10   6 -14 4415.18 478.496   6
  10  -6 -14 4423.22 432.392   6
 -10   6 -14 4302.76 425.565   4
 -10  -6 -14 3380.21 390.504   4
 -10   6 -16 1509.22 287.408   4
  10   6 -16 1591.61 330.369   6
  10   6 -16 1483.00 303.470   2
  10  -6 -16 1718.44 309.735   6
  10   6 -18 148.988 214.470   6
  10   6 -18 341.368 217.337   2
  10  -6 -18 321.717 203.666   6
 -10   6 -18 306.955 211.396   4
  10   6 -20 618.020 239.110   6
  10   6 -20 722.255 254.062   2
 -10   6 -20 470.188 226.094   4
  10   6 -22 38685.9 1547.82   2
 -10  -6 -22 42931.2 1313.81   5
  10   6 -22 40428.7 1373.40   6
 -10  -6 -24 43434.3 1294.55   5
  10   6 -24 42798.0 1402.09   6
 -10  -6 -26 95094.9 1906.27   5
  10   6 -26 92775.2 2060.52   6
 -10  -6 -28 31767.4 1097.88   5
 -10  -6 -30 28386.1 1045.61   5
 -10   6 -30 27376.3 1031.00   5
 -10  -6 -32 1970.90 331.930   5
 -10  -6 -34-166.496 245.333   5
 -10   6 -34 3.14151 145.607   3
 -10  -6 -36 549.852 216.001   5
 -10   6 -36 906.067 213.507   3
  10   8   0 10477.8 640.696   6
  10   8   2 333.527 180.698   6
  10   8  -2 788.770 233.378   6
  10   8   4 45995.6 1320.79   6
  10   8  -4 43816.9 1258.79   6
  10   8  -6 106304. 1984.05   6
  10   8  -6 104916. 1982.37   2
  10   8  -8 126717. 2194.89   6
  10   8  -8 126283. 2238.98   2
 -10   8  -8 132416. 2094.27   4
  10   8 -10 141663. 2354.08   6
  10   8 -10 136534. 2406.19   2
 -10   8 -10 143325. 2194.97   4
  10   8 -12 50843.5 1442.52   6
 -10   8 -12 51204.5 1351.82   4
  10   8 -12 50684.5 1517.22   2
  10   8 -14 8154.02 622.922   6
 -10   8 -14 7267.51 547.061   4
  10   8 -14 7355.65 608.981   2
  10   8 -16 117.594 203.746   6
  10   8 -16 328.510 205.189   2
 -10   8 -16 256.922 193.577   4
  10   8 -18 593.808 274.283   6
  10   8 -18 614.750 259.408   2
 -10  -8 -18 267.360 249.818   5
 -10   8 -18 650.502 233.250   4
  10   8 -20 19934.1 991.877   6
  10   8 -20 18142.2 1069.22   2
 -10  -8 -20 19968.6 895.129   5
  10   8 -22 50312.3 1550.48   6
 -10  -8 -22 49376.3 1369.69   5
 -10  -8 -24 112934. 2036.87   5
  10   8 -24 111880. 2302.49   6
 -10  -8 -26 58178.1 1469.64   5
  10   8 -26 56905.2 1634.81   6
 -10  -8 -28 78338.0 1700.65   5
  10   8 -28 73333.4 1816.00   6
 -10  -8 -30 18384.2 827.798   5
 -10  -8 -32 5674.61 491.299   5
 -10  -8 -34 3090.27 371.144   5
 -10   8 -34 2983.34 352.823   3
 -10   8 -36 6709.52 476.806   3
  10  10   0 1105.31 257.053   6
  10  10   2 17290.2 808.543   6
  10  10  -2 15235.0 765.603   6
 -10  10  -4 16782.3 775.375   4
  10  10  -4 17558.4 828.113   6
  10  10   6 44887.9 1352.97   6
  10  10  -6 39812.6 1249.37   6
  10  10  -6 39313.0 1281.48   2
 -10  10  -6 42969.9 1192.78   4
  10  10  -8 79673.2 1772.04   6
  10  10  -8 76736.2 1844.96   2
 -10  10  -8 80308.4 1660.26   4
  10  10 -10 69871.4 1704.64   6
  10  10 -10 67951.8 1772.64   2
 -10  10 -10 72048.7 1572.14   4
  10  10 -12 27090.2 1068.50   6
 -10 -10 -12 24977.8 953.382   5
 -10  10 -12 26821.2 983.232   4
  10  10 -12 26945.9 1172.08   2
  10  10 -14 4633.29 476.162   6
 -10 -10 -14 4179.97 427.693   5
 -10  10 -14 4094.84 422.313   4
  10  10 -14 4123.43 500.700   2
  10  10 -16 1969.09 338.791   6
  10  10 -16 1979.81 382.621   2
 -10 -10 -16 2064.48 314.602   5
 -10  10 -16 2120.31 344.291   4
  10  10 -18 166.583 232.037   6
  10  10 -18 269.001 186.361   2
 -10 -10 -18-46.3082 230.780   5
  10  10 -20 4834.73 509.933   6
 -10 -10 -20 4598.51 438.468   5
  10  10 -22 74122.0 1899.29   6
 -10 -10 -22 76550.3 1657.38   5
  10  10 -24 65295.0 1798.14   6
 -10 -10 -24 68928.0 1570.23   5
 -10 -10 -26 79362.3 1712.99   5
  10  10 -26 79024.2 1932.05   6
 -10 -10 -28 18793.1 847.205   5
  10  10 -28 18734.9 935.943   6
 -10 -10 -30 2004.14 316.385   5
 -10 -10 -32 65.6482 204.005   5
 -10  10 -32-31.9956 156.141   3
 -10  10 -34 195.482 156.341   3
 -10  10 -36 2268.15 282.196   3
 -10  12   0 2246.65 311.692   4
  10  12   0 2458.18 370.740   6
  10  12   2 7830.28 583.515   6
  10  12  -2 7288.16 558.201   6
 -10  12  -2 7117.31 519.910   4
 -10  12  -4 233.585 160.494   4
  10  12   4 320.758 212.399   6
  10  12  -4 312.968 208.475   6
 -10  12  -6 1668.26 281.550   4
  10  12   6 2035.16 323.033   6
  10  12  -6 1694.65 296.424   2
  10  12  -6 1991.22 341.018   6
  10  12  -8 7198.57 581.077   6
 -10 -12  -8 7017.72 479.989   5
  10  12  -8 6924.55 606.459   2
 -10  12  -8 7415.80 525.160   4
  10  12 -10 2744.55 371.205   6
 -10 -12 -10 2778.28 338.017   5
  10  12 -10 3280.60 455.203   2
 -10  12 -10 2959.04 363.717   4
  10  12 -12 3619.46 491.483   2
  10  12 -12 3565.36 448.747   6
 -10 -12 -12 3322.08 358.267   5
 -10  12 -12 3262.10 394.160   4
  10  12 -14 4713.97 506.497   6
 -10 -12 -14 3836.49 384.605   5
 -10  12 -14 4985.59 481.764   4
  10  12 -14 4484.30 529.006   2
  10  12 -16 12510.5 779.956   6
 -10 -12 -16 12369.7 653.955   5
  10  12 -16 12337.6 882.290   2
  10  12 -18 17843.9 943.202   6
 -10 -12 -18 16898.4 773.533   5
  10  12 -20 614.879 293.943   6
 -10 -12 -20-28.8206 195.374   5
  10  12 -22 2500.25 418.054   6
 -10 -12 -22 2155.98 341.192   5
  10  12 -24 40256.2 1384.78   6
 -10 -12 -24 40209.4 1212.37   5
  10  12 -26 23249.6 1055.54   6
 -10 -12 -26 23603.8 945.018   5
  10  12 -28-179.122 205.307   6
 -10 -12 -28 371.336 227.718   5
 -10 -12 -30 11458.0 663.607   5
 -10  12 -32 14711.2 707.414   3
 -10  12 -34 12550.6 621.340   3
 -10  12 -36 1279.42 228.127   3
  10  14   0 97814.2 2053.34   6
 -10  14   0 99948.4 1824.42   4
  10  14   2 57574.4 1584.55   6
  10  14  -2 52813.0 1504.15   6
 -10  14  -2 53502.9 1376.17   4
 -10  14   2 53530.4 1341.24   4
  10  14  -4 37340.1 1292.92   6
 -10  14  -4 38233.0 1135.33   4
 -10  14   4 35255.3 1100.03   4
  10  14   6 10994.2 732.773   6
  10  14  -6 9096.68 656.390   6
 -10  14  -6 9092.98 584.624   4
  10  14  -8 15124.4 830.251   6
  10  14  -8 13408.3 876.077   2
 -10  14  -8 15192.0 763.947   4
  10  14 -10 209.222 223.280   2
  10  14 -10 253.069 232.445   6
 -10 -14 -10 286.263 171.382   5
 -10  14 -10 306.521 201.683   4
  10  14 -12 5020.97 512.335   6
 -10 -14 -12 4119.20 395.469   5
 -10  14 -12 5172.32 474.615   4
  10  14 -12 4017.94 524.823   2
  10  14 -14 28762.5 1161.46   6
 -10 -14 -14 26332.6 915.733   5
  10  14 -16 92948.0 2075.74   6
 -10 -14 -16 86646.9 1660.58   5
  10  14 -18 60886.9 1715.88   6
 -10 -14 -18 56910.5 1372.66   5
  10  14 -20 31325.1 1248.28   6
 -10 -14 -20 31030.7 1040.98   5
  10  14 -22 3505.57 461.070   6
 -10 -14 -22 3062.21 369.699   5
  10  14 -24 424.410 240.257   6
 -10 -14 -24 235.306 211.873   5
  10  14 -26 97.5494 207.569   6
 -10 -14 -26 10.7329 208.959   5
  10  14 -28 4518.22 467.771   6
 -10  14 -30 37817.1 1087.49   3
 -10  14 -32 58364.4 1316.42   3
 -10  14 -34 42260.5 1088.67   3
  10  16   0 83437.8 1985.16   6
 -10  16   0 75907.6 1628.78   4
  10  16  -2 117871. 2346.51   6
 -10  16  -2 119963. 2021.62   4
  10  16  -4 35199.4 1306.10   6
 -10  16  -4 35702.1 1126.98   4
  10  16  -6 39248.5 1354.48   6
 -10  16  -6 40228.3 1193.79   4
  10  16  -8-51.3647 275.382   6
 -10  16  -8-14.6313 161.187   4
  10  16 -10 15.5034 306.720   6
  10  16 -12 8201.31 649.106   6
 -10 -16 -12 7341.75 495.061   5
  10  16 -14 55074.3 1608.43   6
 -10 -16 -14 51119.1 1262.62   5
  10  16 -16 77600.8 1918.03   6
 -10 -16 -16 71307.2 1496.80   5
  10  16 -18 80218.4 1950.02   6
 -10 -16 -18 74890.3 1562.43   5
  10  16 -20 43146.6 1437.50   6
 -10 -16 -20 40591.7 1159.66   5
  10  16 -22 6377.32 566.648   6
 -10 -16 -22 6072.75 473.909   5
  10  16 -24 3948.16 464.001   6
  10  16 -26 907.430 271.144   6
  10  16 -28 4313.24 443.692   6
 -10  16 -28 4522.29 389.581   3
 -10  16 -30 23711.8 842.866   3
 -10  16 -32 55618.8 1226.77   3
  10  18   0 106608. 2315.14   6
  10  18   2 24372.4 1142.48   6
  10  18  -2 23660.8 1090.15   6
  10  18   4 46338.5 1573.44   6
  10  18  -4 41062.4 1439.16   6
  10  18  -6 399.944 228.370   6
  10  18  -8 6055.89 574.112   6
  10  18 -10 108.144 276.169   6
  10  18 -12 3734.52 472.664   6
  10  18 -14 17699.3 936.267   6
  10  18 -16 29116.9 1168.94   6
  10  18 -18 40716.8 1389.28   6
  10  18 -20 14569.0 826.209   6
  10  18 -22 3849.93 440.076   6
  10  18 -24 1104.29 260.265   6
  10  18 -26 275.020 174.839   6
 -10  18 -26 500.707 171.654   3
  10  18 -28 276.610 167.688   6
 -10  18 -28 267.334 137.001   3
 -10  18 -30 5090.15 380.970   3
  10  20   0 5176.94 585.923   6
  10  20   2 37294.2 1476.88   6
  10  20  -2 33478.3 1368.66   6
  10  20  -4 2249.88 384.979   6
  10  20  -6 13542.8 857.466   6
  10  20  -8 13835.3 851.628   6
  10  20 -10 1970.20 352.592   6
  10  20 -12-568.884 318.102   6
  10  20 -14-237.475 288.223   6
  10  20 -16 7906.74 608.827   6
  10  20 -18 3710.84 439.312   6
  10  20 -20 223.795 192.548   6
  10  20 -22 4231.77 433.814   6
 -10  20 -22 4447.09 380.001   3
  10  20 -24 8878.13 579.264   6
 -10  20 -24 8296.65 500.846   3
  10  20 -26 10702.2 615.080   6
 -10  20 -26 11294.5 557.670   3
  10  22   0 6929.03 677.211   6
  10  22   2 1592.53 416.330   6
  10  22  -2 1206.26 305.665   6
  10  22  -4 6629.37 623.688   6
  10  22  -6 35515.9 1370.13   6
  10  22  -8 31856.6 1279.07   6
  10  22 -10 16313.0 907.108   6
  10  22 -12 5702.10 540.121   6
  10  22 -14-68.8039 222.016   6
  10  22 -16 30.9613 192.486   6
  10  22 -18 1036.98 259.690   6
 -10  22 -18 574.393 155.266   3
  10  22 -20 7691.82 552.641   6
 -10  22 -20 6105.67 421.448   3
  10  22 -22 16681.3 765.911   6
 -10  22 -22 12629.5 578.065   3
  10  22 -24 29636.9 970.270   6
  10  24   0 1879.18 392.830   6
  10  24  -2 6143.35 624.214   6
  10  24  -4 19133.5 1026.15   6
  10  24  -6 27876.7 1182.89   6
  10  24  -8 46999.3 1490.43   6
  10  24 -10 38040.2 1313.72   6
  10  24 -12 13670.7 777.212   6
  10  24 -14 3154.73 390.751   6
  10  24 -16 2928.79 356.795   6
  10  24 -18 5039.48 433.748   6
  10  24 -20 10227.4 573.169   6
  10  26  -2-251.425 214.972   6
  10  26  -4 6955.60 603.830   6
  10  26  -6 16934.9 880.031   6
  10  26  -8 19412.7 912.405   6
  10  26 -10 23225.2 964.304   6
  10  26 -12 10257.8 633.055   6
  10  26 -14 1454.64 258.177   6
  11  -1   1 123490. 2139.36   6
  11  -1  -1 126791. 2174.49   6
  11   1   1 124894. 2175.32   6
  11   1  -1 124192. 2183.44   6
  11  -1   3 23347.1 927.414   6
  11  -1  -3 24017.1 977.410   6
  11   1   3 22112.8 933.739   6
  11   1  -3 22542.5 944.365   6
  11   1  -5 2950.16 379.822   6
  11  -1   5 2882.71 362.050   6
  11   1   5 2740.53 372.307   6
  11  -1  -5 2968.68 389.740   6
  11  -1  -7-118.123 242.111   6
  11   1  -7 157.715 246.468   6
  11  -1   7 255.662 208.516   6
  11   1   7 174.097 176.265   6
  11  -1  -9 386.050 207.635   6
  11   1  -9 189.950 218.057   6
  11  -1   9 280.343 170.407   6
  11   1   9 289.803 185.216   6
  11  -1 -11-512.570 314.752   6
  11   1 -11 78.5660 276.811   6
  11  -1 -13 4245.73 463.061   6
  11   1 -13 4319.32 458.970   6
 -11   1 -13 4399.51 445.381   4
 -11  -1 -13 4171.16 430.418   4
  11  -1 -15 22569.0 1007.07   6
 -11   1 -15 20029.2 928.131   4
 -11  -1 -15 19981.7 912.873   4
  11   1 -15 22411.5 995.270   6
 -11   1 -17 10551.2 701.998   4
 -11  -1 -17 9739.29 661.102   4
  11  -1 -17 11580.2 723.903   6
  11   1 -17 11772.7 746.251   6
 -11   1 -19 20919.1 922.109   4
 -11  -1 -19 18654.3 878.544   4
  11  -1 -19 20802.9 955.472   6
  11   1 -19 20612.6 965.018   6
 -11   1 -21 3667.51 435.230   4
 -11  -1 -21 3837.38 423.847   4
  11  -1 -21 4704.79 474.235   6
  11   1 -21 4603.53 508.527   6
  11  -1 -23 6136.01 547.660   6
  11   1 -23 6087.56 546.514   6
  11  -1 -25 8869.64 628.743   6
  11   1 -25 8837.80 635.116   6
 -11  -1 -27 7541.74 603.292   5
 -11   1 -27 6271.18 574.748   5
 -11  -1 -29 1406.91 295.260   5
 -11   1 -29 1316.85 303.413   5
 -11  -1 -31 17057.5 790.364   5
 -11   1 -31 16102.0 771.389   5
 -11  -1 -33 34366.1 1090.83   5
 -11   1 -33 34767.5 1082.85   5
 -11  -1 -35 28029.3 954.430   5
 -11   1 -35 24649.6 886.823   5
 -11  -1 -37 4833.25 380.627   5
  11  -3   1 54700.3 1407.79   6
  11  -3  -1 57209.8 1446.97   6
  11   3   1 54201.6 1438.76   6
  11   3  -1 53585.2 1453.47   6
  11  -3   3 7158.67 539.558   6
  11   3   3 6226.65 525.004   6
  11  -3  -3 7223.65 559.001   6
  11   3  -3 6995.32 556.169   6
  11   3   5 85.7170 172.493   6
  11   3  -5-144.660 212.596   6
  11  -3   5 133.535 192.071   6
  11  -3  -5 107.675 198.954   6
  11  -3  -7 70203.2 1616.62   6
  11   3   7 70355.7 1692.94   6
  11   3  -7 67914.5 1643.44   6
  11   3   9 24052.9 993.509   6
  11  -3  -9 24652.0 1009.24   6
  11   3  -9 23829.7 1005.81   6
 -11   3 -11 249.887 205.641   4
  11   3 -11 556.627 248.851   6
  11  -3 -11 172.963 205.546   6
 -11   3 -13 2393.92 359.035   4
  11   3 -13 2813.99 413.811   6
 -11  -3 -13 2582.43 365.054   4
  11  -3 -13 2291.57 360.740   6
 -11  -3 -15 2048.87 332.829   4
 -11   3 -15 2549.54 371.356   4
  11   3 -15 3061.29 424.574   6
  11  -3 -15 2462.46 374.867   6
 -11   3 -17 28217.1 1083.87   4
 -11  -3 -17 26905.8 1027.39   4
  11  -3 -17 29664.9 1122.12   6
  11   3 -17 30808.0 1202.33   6
  11   3 -19 1182.82 299.584   6
  11  -3 -19 1480.06 315.773   6
 -11   3 -19 889.392 270.027   4
 -11  -3 -19 903.189 245.459   4
  11   3 -21 186.503 208.232   6
 -11  -3 -21 101.464 181.772   4
 -11   3 -21-121.557 224.534   4
  11  -3 -21 566.452 255.098   6
  11   3 -23-92.1050 203.258   6
  11  -3 -23-18.8265 189.371   6
 -11  -3 -25 55955.3 1546.87   5
  11   3 -25 52696.4 1546.26   6
 -11  -3 -27 14273.3 781.169   5
 -11  -3 -29 1091.55 281.482   5
 -11   3 -29 78.9261 253.890   5
 -11  -3 -31 6299.08 500.854   5
 -11   3 -31 5940.07 477.241   5
 -11  -3 -33 16680.5 773.393   5
 -11   3 -33 15555.9 719.322   5
 -11   3 -33 16987.1 742.642   3
 -11  -3 -35 15305.6 708.010   5
 -11   3 -35 12581.9 619.049   5
 -11  -3 -37 958.608 207.410   5
  11  -5   1 11882.0 679.331   6
  11  -5  -1 12075.8 683.980   6
  11   5   1 11255.5 681.234   6
  11   5  -1 11100.5 684.744   6
  11  -5  -3 11365.6 684.131   6
  11   5   3 10634.9 675.336   6
  11   5  -3 10922.7 676.595   6
  11   5   5 28548.3 1096.98   6
  11   5  -5 26634.6 1044.92   6
  11  -5  -7 41231.2 1234.71   6
  11   5   7 40075.9 1313.31   6
  11   5  -7 37596.0 1235.60   6
  11   5  -9 90156.1 1922.00   6
 -11   5  -9 87027.7 1821.76   4
  11  -5  -9 91475.6 1890.22   6
  11   5 -11 8955.64 645.328   2
  11  -5 -11 11601.7 708.080   6
 -11   5 -11 9859.48 649.332   4
  11   5 -11 9856.64 676.671   6
 -11   5 -13 2295.39 336.259   4
 -11  -5 -13 2158.29 326.111   4
  11   5 -13 2172.93 390.856   6
  11   5 -13 1866.71 331.825   2
  11  -5 -13 2609.58 384.570   6
  11   5 -15 17333.7 964.300   2
  11  -5 -15 19685.7 912.862   6
 -11   5 -15 18404.0 868.927   4
 -11  -5 -15 17616.8 823.586   4
  11   5 -15 18844.7 954.679   6
  11   5 -17 6260.80 623.498   2
 -11   5 -17 6134.75 525.284   4
  11  -5 -17 6592.86 552.525   6
 -11  -5 -17 5102.06 473.135   4
  11   5 -17 6647.18 584.926   6
  11   5 -19 4709.99 566.784   2
 -11   5 -19 4634.64 482.999   4
  11  -5 -19 4807.75 469.541   6
  11   5 -19 5309.66 553.659   6
  11   5 -21 7901.19 636.836   6
 -11  -5 -23 21067.3 952.001   5
  11   5 -23 20306.2 991.231   6
 -11  -5 -25 4670.36 465.160   5
  11   5 -25 4743.78 491.503   6
 -11  -5 -27 41826.7 1278.31   5
  11   5 -27 38197.5 1314.77   6
 -11  -5 -29 11812.9 689.446   5
 -11   5 -29 10253.6 651.803   5
 -11  -5 -31-172.202 239.699   5
 -11   5 -31-214.203 266.749   5
 -11  -5 -33 7455.74 517.537   5
 -11   5 -33 6352.20 457.394   5
 -11   5 -33 7749.51 528.837   3
 -11  -5 -35 2685.22 335.415   5
 -11   5 -35 2454.30 287.839   3
  11   7  -1 10098.0 651.889   6
  11   7   1 10005.8 649.745   6
  11   7   3 2509.22 365.626   6
  11   7  -3 2353.39 363.421   6
  11   7  -5 3946.59 438.909   6
  11   7   5 4666.66 470.564   6
 -11   7  -7 59516.4 1489.03   4
  11   7  -7 57796.5 1535.24   6
  11   7   7 61075.8 1641.22   6
  11   7  -9 50903.2 1469.42   6
 -11   7  -9 49377.4 1364.21   4
  11   7 -11 25608.3 1080.34   6
  11   7 -11 22862.1 1057.55   2
 -11   7 -11 26490.8 1016.57   4
  11   7 -13 6629.66 568.754   6
  11   7 -13 5883.31 566.887   2
 -11   7 -13 6808.12 537.800   4
  11   7 -15 12389.5 780.588   6
  11   7 -15 10207.7 764.765   2
 -11   7 -15 11309.0 674.701   4
  11   7 -17 18111.2 942.344   6
 -11   7 -17 16976.0 831.517   4
  11   7 -19 2920.01 428.096   6
 -11  -7 -19 2511.72 393.470   5
 -11   7 -19 2262.22 332.374   4
 -11  -7 -21 10293.6 666.806   5
  11   7 -21 10016.1 719.337   6
 -11  -7 -23 37930.6 1227.31   5
  11   7 -23 37785.4 1349.50   6
 -11  -7 -25 18380.9 854.752   5
  11   7 -25 17150.0 912.877   6
 -11  -7 -27 9653.68 625.746   5
  11   7 -27 9583.93 685.220   6
 -11  -7 -29 19633.7 864.250   5
 -11   7 -29 17563.1 832.480   5
 -11  -7 -31-328.938 258.173   5
 -11  -7 -33 845.485 208.081   5
 -11   7 -33 1039.16 217.122   3
 -11  -7 -35 1184.99 247.292   5
 -11   7 -35 1054.04 196.971   3
  11   9   1 1513.52 295.107   6
  11   9  -1 1413.30 302.656   6
  11   9   3 175.082 182.247   6
  11   9  -3 511.772 231.128   6
 -11   9  -5 11478.7 667.836   4
  11   9  -5 10578.7 693.921   6
  11   9   5 11986.5 749.301   6
  11   9  -7 29981.9 1124.89   6
  11   9   7 33385.8 1218.11   6
 -11   9  -7 29976.7 1053.40   4
  11   9  -9 34288.0 1213.76   6
 -11   9  -9 34042.8 1155.75   4
 -11   9 -11 1874.09 320.066   4
  11   9 -11 1903.35 361.680   6
  11   9 -11 1408.14 306.654   2
  11   9 -13 3267.59 442.736   6
  11   9 -13 2292.35 391.760   2
 -11   9 -13 2904.84 395.318   4
  11   9 -15 10625.9 821.518   2
  11   9 -15 12864.2 797.705   6
 -11  -9 -15 11699.8 696.603   5
 -11   9 -15 12409.8 712.577   4
  11   9 -17 25090.9 1094.29   6
 -11  -9 -17 23382.0 962.182   5
 -11   9 -17 25121.4 1012.34   4
  11   9 -19 4860.50 529.176   6
 -11  -9 -19 4461.51 446.393   5
  11   9 -21 5901.05 583.294   6
 -11  -9 -21 6185.99 509.133   5
 -11  -9 -23 26581.8 1018.90   5
  11   9 -23 25645.6 1121.83   6
 -11  -9 -25 61226.2 1507.28   5
  11   9 -25 61528.7 1717.13   6
 -11  -9 -27 13396.0 725.382   5
  11   9 -27 13590.3 802.103   6
 -11  -9 -29 1348.41 287.464   5
 -11  -9 -31 8.17189 218.020   5
 -11  -9 -33 855.233 211.259   5
 -11   9 -33 1600.85 254.003   3
 -11   9 -35-310.678 190.184   3
 -11  11  -1 4382.85 413.745   4
  11  11   1 5020.64 478.855   6
  11  11  -1 4732.36 473.778   6
  11  11   3 3508.11 409.741   6
  11  11  -3 2961.85 405.802   6
 -11  11  -3 2876.16 342.545   4
  11  11   5 3473.26 434.275   6
  11  11  -5 3103.63 411.438   6
 -11  11  -5 3235.87 382.669   4
  11  11  -7 9105.60 657.874   6
 -11 -11  -7 8405.85 541.414   5
 -11  11  -7 9794.05 633.658   4
 -11  11  -9 684.837 229.314   4
  11  11  -9 436.080 245.520   6
 -11 -11  -9-25.0804 214.007   5
  11  11 -11 20321.5 980.887   6
 -11 -11 -11 18404.5 799.008   5
 -11  11 -11 21459.8 898.120   4
  11  11 -13 333.733 225.052   6
  11  11 -13 22.8986 188.377   2
 -11 -11 -13-70.2495 238.735   5
 -11  11 -13 635.878 239.081   4
  11  11 -15 10980.5 738.369   6
 -11 -11 -15 10050.4 598.584   5
 -11  11 -15 11663.1 703.518   4
  11  11 -17 42269.7 1440.20   6
 -11 -11 -17 40151.2 1181.37   5
  11  11 -19 4470.93 501.969   6
 -11 -11 -19 4473.09 420.737   5
  11  11 -21-4.53536 216.821   6
 -11 -11 -21-417.415 273.843   5
  11  11 -23 25913.6 1149.35   6
 -11 -11 -23 26376.6 981.480   5
 -11 -11 -25 42820.2 1246.87   5
  11  11 -25 41142.4 1390.99   6
 -11 -11 -27 4014.17 409.984   5
  11  11 -27 3695.50 459.780   6
  11  11 -29 1071.03 251.767   6
 -11 -11 -29 1698.00 300.534   5
 -11 -11 -31 14214.4 703.039   5
 -11  11 -33 1991.02 272.875   3
  11  13   1 24327.6 1037.73   6
  11  13  -1 23379.1 1024.64   6
 -11  13  -1 22980.0 920.180   4
 -11  13   1 22234.5 918.344   4
  11  13   3 7257.15 592.804   6
  11  13  -3 6388.57 567.237   6
 -11  13  -3 6731.97 517.813   4
 -11  13   3 6462.58 501.992   4
  11  13   5 4584.20 512.237   6
  11  13  -5 3819.99 458.275   6
 -11  13  -5 4337.39 415.333   4
  11  13  -7 8039.30 635.968   6
 -11  13  -7 8488.83 573.580   4
  11  13  -9 18781.8 958.593   6
 -11 -13  -9 17127.9 731.038   5
 -11  13  -9 19857.0 862.581   4
  11  13 -11 9823.94 710.241   6
 -11 -13 -11 8805.35 537.216   5
 -11  13 -11 10449.9 654.046   4
  11  13 -13 721.717 317.473   6
 -11 -13 -13 648.209 195.992   5
 -11  13 -13 1056.43 273.761   4
  11  13 -15 39502.1 1398.97   6
 -11 -13 -15 36727.5 1090.95   5
  11  13 -17 31780.4 1249.96   6
 -11 -13 -17 30048.6 991.580   5
  11  13 -19 37843.0 1375.87   6
 -11 -13 -19 35806.8 1101.84   5
  11  13 -21-73.1888 247.608   6
 -11 -13 -21-410.581 284.093   5
  11  13 -23 8296.08 660.685   6
 -11 -13 -23 7355.02 524.407   5
 -11 -13 -25 3266.41 384.579   5
  11  13 -25 3533.46 441.663   6
 -11 -13 -27 3438.44 391.197   5
  11  13 -27 3392.44 420.662   6
  11  13 -29 3323.59 383.270   6
 -11  13 -31 13755.6 637.988   3
 -11  13 -33 22246.8 785.297   3
  11  15   1 34793.1 1296.84   6
  11  15  -1 34668.6 1276.28   6
 -11  15  -1 33658.3 1096.42   4
 -11  15   1 33567.8 1090.30   4
  11  15   3 12545.6 815.200   6
  11  15  -3 10798.9 725.572   6
 -11  15  -3 11284.3 658.521   4
 -11  15   3 10288.6 619.664   4
  11  15  -5 34316.8 1292.14   6
 -11  15  -5 34593.0 1122.63   4
  11  15  -7 2057.07 362.555   6
 -11  15  -7 2467.98 340.256   4
  11  15  -9 16664.8 905.915   6
 -11  15  -9 17106.1 810.404   4
  11  15 -11 5224.02 552.027   6
  11  15 -13 11215.0 770.598   6
 -11 -15 -13 9990.40 566.691   5
  11  15 -15 20430.5 1006.55   6
 -11 -15 -15 19347.1 795.055   5
  11  15 -17 54128.8 1629.37   6
 -11 -15 -17 49223.9 1268.89   5
  11  15 -19 17742.6 929.317   6
 -11 -15 -19 16840.4 757.836   5
  11  15 -21 1531.18 340.097   6
 -11 -15 -21 1188.20 226.441   5
  11  15 -23 117.234 205.534   6
 -11 -15 -23-87.6271 222.724   5
  11  15 -25 6013.15 537.728   6
  11  15 -27 308.079 200.762   6
  11  15 -29 407.984 189.427   6
 -11  15 -29-166.330 201.049   3
 -11  15 -31 13233.4 598.491   3
  11  17   1 21638.4 1066.65   6
  11  17  -1 20979.3 1061.53   6
  11  17  -3 33910.2 1327.99   6
 -11  17  -3 34344.3 1134.54   4
  11  17  -5 3868.29 475.468   6
 -11  17  -5 4667.44 441.435   4
  11  17  -7 10948.5 761.126   6
  11  17  -9 8461.28 687.823   6
  11  17 -11-26.1854 243.638   6
  11  17 -13 579.656 262.908   6
  11  17 -15 13545.1 828.183   6
  11  17 -17 15426.7 858.016   6
  11  17 -19 8030.36 621.830   6
  11  17 -21 245.637 206.893   6
  11  17 -23 4161.27 441.137   6
  11  17 -25 5341.10 478.170   6
 -11  17 -27 6991.08 453.076   3
  11  17 -27 6696.49 502.556   6
 -11  17 -29-230.116 181.827   3
  11  19   1 24897.6 1191.52   6
  11  19  -1 23237.7 1150.43   6
  11  19   3 346.843 222.972   6
  11  19  -3 268.214 236.474   6
  11  19  -5 10264.9 750.119   6
  11  19  -7 20906.7 1053.28   6
  11  19  -9 6644.24 602.703   6
  11  19 -11-309.363 269.195   6
  11  19 -13-116.118 263.541   6
  11  19 -15 2924.37 400.406   6
  11  19 -17 3713.06 439.994   6
  11  19 -19 477.966 209.693   6
  11  19 -21 1639.46 281.750   6
  11  19 -23 7873.59 559.429   6
  11  19 -25 14074.9 706.251   6
 -11  19 -25 14012.4 613.024   3
 -11  19 -27 5460.02 382.640   3
  11  21   1 8356.51 727.587   6
  11  21  -1 8856.78 738.456   6
  11  21  -3 445.568 234.740   6
  11  21  -5 6597.32 610.912   6
  11  21  -7 26657.2 1182.73   6
  11  21  -9 12722.6 812.797   6
  11  21 -11 1518.21 300.534   6
  11  21 -13 1755.57 328.944   6
  11  21 -15 545.828 209.270   6
  11  21 -17 36.9811 178.673   6
  11  21 -19 460.973 182.994   6
  11  21 -21 3664.37 380.219   6
 -11  21 -21 2505.30 267.073   3
  11  21 -23 13235.4 657.945   6
  11  23  -1 1465.36 341.290   6
  11  23  -3 150.904 231.318   6
  11  23  -5 17479.7 968.060   6
  11  23  -7 14792.7 853.058   6
  11  23  -9 20319.2 969.598   6
  11  23 -11 4250.68 464.473   6
  11  23 -13-76.5425 172.196   6
  11  23 -15 1051.04 248.566   6
  11  23 -17 16.4051 152.293   6
  11  23 -19 334.282 175.914   6
  11  25  -3 384.408 215.195   6
  11  25  -5 2733.03 391.306   6
  11  25  -7 10162.1 692.340   6
  11  25  -9 9847.52 656.312   6
  11  25 -11 7453.87 551.145   6
  11  25 -13 161.871 168.150   6
  12   0   0 51215.4 1468.37   6
  12   0  -2 1598.65 318.231   6
  12   0   2 1311.13 314.385   6
  12   0   4 8811.47 631.195   6
  12   0  -4 10205.4 683.480   6
  12   0   6 70364.6 1700.82   6
  12   0  -6 76188.0 1790.27   6
  12   0   8 62607.6 1608.02   6
  12   0  -8 62415.0 1634.48   6
  12   0 -10 48018.3 1457.01   6
  12   0 -12 24726.8 1065.75   6
 -12   0 -12 21553.2 993.039   4
  12   0 -14-35.8997 271.531   6
 -12   0 -14 243.445 217.523   4
  12   0 -16 2115.34 376.491   6
 -12   0 -16 1575.58 320.409   4
 -12   0 -18 2371.73 367.409   4
  12   0 -18 2994.59 420.338   6
 -12   0 -20 9286.56 647.903   4
  12   0 -20 8983.81 668.295   6
  12   0 -22 1442.43 323.055   6
  12   0 -24 52550.9 1515.28   6
 -12   0 -26 31385.8 1188.95   5
  12   0 -26 27008.5 1067.10   6
 -12   0 -28 41745.6 1308.18   5
 -12   0 -30 3637.95 402.151   5
 -12   0 -32 1032.48 237.750   5
 -12   0 -34 6540.74 462.274   5
  12  -2   0 21961.0 957.498   6
  12   2   0 22254.7 974.379   6
  12  -2   2 13359.1 760.303   6
  12  -2  -2 14336.6 788.723   6
  12   2   2 13320.7 775.522   6
  12   2  -2 13227.5 766.911   6
  12  -2   4 12563.8 738.797   6
  12  -2  -4 14263.5 781.399   6
  12   2   4 13607.1 769.258   6
  12   2  -4 13414.0 771.878   6
  12  -2   6 42986.9 1312.91   6
  12   2   6 43151.1 1354.70   6
  12  -2  -6 45243.2 1379.40   6
  12   2  -6 43111.6 1378.30   6
  12   2   8 73995.2 1757.51   6
  12  -2  -8 70059.1 1706.25   6
  12   2  -8 69589.0 1728.07   6
 -12   2 -10 41907.3 1331.37   4
  12  -2 -10 43332.2 1362.81   6
  12   2 -10 39978.0 1327.46   6
 -12   2 -12 535.736 239.998   4
  12   2 -12-97.0581 283.641   6
 -12  -2 -12 780.602 258.881   4
  12  -2 -12 390.628 263.089   6
  12   2 -14 3238.48 412.777   6
  12  -2 -14 3466.51 441.417   6
 -12   2 -14 2898.82 405.732   4
 -12  -2 -14 3065.84 413.422   4
 -12   2 -16 3450.92 433.099   4
  12  -2 -16 4399.18 491.068   6
 -12  -2 -16 3712.06 406.596   4
  12   2 -16 3635.44 452.767   6
 -12  -2 -18 265.475 200.242   4
  12   2 -18-99.4506 234.849   6
  12  -2 -18 164.665 196.050   6
 -12   2 -18-115.731 201.704   4
  12   2 -20 2196.81 366.776   6
 -12   2 -20 1707.05 336.158   4
 -12  -2 -20 2100.73 325.223   4
  12  -2 -20 2522.76 392.279   6
  12  -2 -22 18669.3 915.303   6
  12   2 -22 19500.8 970.268   6
 -12  -2 -24 16761.2 912.385   5
  12  -2 -24 14760.7 794.179   6
  12   2 -24 15590.9 860.710   6
 -12  -2 -26 67190.0 1674.35   5
  12   2 -26 56562.8 1566.49   6
 -12  -2 -28 15871.8 800.017   5
 -12   2 -28 13379.8 765.466   5
 -12  -2 -30 2904.69 363.109   5
 -12   2 -30 2448.60 329.199   5
 -12  -2 -32 2338.37 310.196   5
 -12   2 -32 2282.16 295.377   5
 -12  -2 -34 6177.44 446.114   5
 -12   2 -34 4849.86 405.631   5
  12  -4   0 37616.3 1217.85   6
  12   4   0 35713.1 1219.35   6
  12  -4   2 9880.81 643.725   6
  12  -4  -2 9939.72 677.921   6
  12   4   2 9361.00 637.914   6
  12   4  -2 8665.61 617.728   6
  12   4   4-193.833 258.267   6
  12   4  -4 283.379 270.889   6
  12  -4  -4 18.5919 234.054   6
  12  -4  -6 26842.6 1060.85   6
  12   4   6 25992.8 1075.32   6
  12   4  -6 24850.8 1047.41   6
  12  -4  -8 47015.4 1424.35   6
  12   4   8 47419.5 1457.88   6
  12   4  -8 47039.7 1463.14   6
  12  -4 -10 3007.80 421.428   6
  12   4 -10 3280.45 460.226   6
 -12   4 -10 2784.13 387.888   4
 -12   4 -12 1559.59 303.899   4
 -12  -4 -12 1092.22 323.235   4
  12   4 -12 1867.08 360.541   6
  12  -4 -12 2116.39 386.586   6
  12  -4 -14 22618.8 1016.23   6
 -12   4 -14 21129.6 959.654   4
 -12  -4 -14 20448.5 925.430   4
  12   4 -14 21733.7 1031.29   6
  12  -4 -16 6083.75 549.945   6
 -12   4 -16 5363.46 515.298   4
 -12  -4 -16 4818.21 487.185   4
  12   4 -16 5905.10 569.753   6
 -12   4 -18 11401.0 727.417   4
 -12  -4 -18 11950.3 700.893   4
  12  -4 -18 12581.2 766.253   6
  12   4 -18 13646.4 815.403   6
  12   4 -20-24.2436 237.723   6
 -12   4 -20-233.556 268.812   4
  12   4 -22 1913.92 342.011   6
 -12  -4 -22 1838.18 369.492   5
 -12  -4 -24 24073.2 1027.89   5
  12   4 -24 22378.3 1035.04   6
 -12  -4 -26 13624.1 762.720   5
  12   4 -26 13374.2 786.622   6
 -12  -4 -28 13962.0 749.189   5
 -12   4 -28 12527.5 735.674   5
 -12  -4 -30-464.197 266.821   5
 -12   4 -30-229.092 250.187   5
 -12  -4 -32 4347.98 406.266   5
 -12   4 -32 3780.18 382.725   5
 -12  -4 -34 11057.7 594.799   5
  12   6   0 33030.6 1190.03   6
  12   6   2 20170.4 925.698   6
  12   6  -2 19309.8 911.951   6
  12   6   4 2991.07 390.909   6
  12   6  -4 2664.15 390.940   6
  12   6   6 2770.13 371.800   6
  12   6  -6 2934.23 407.619   6
  12   6   8 2207.12 337.245   6
 -12   6  -8 2418.06 363.178   4
  12   6  -8 2421.28 376.399   6
  12  -6  -8 2676.65 381.454   6
  12  -6 -10 9316.22 645.399   6
 -12   6 -10 8635.43 613.921   4
  12   6 -10 7785.95 630.831   6
 -12   6 -12 17998.1 863.457   4
  12   6 -12 17322.6 911.526   6
 -12  -6 -12 15733.9 831.171   4
 -12   6 -14 21216.7 939.813   4
 -12  -6 -14 21069.9 920.582   4
  12   6 -14 22857.4 1047.11   6
 -12   6 -16 61565.2 1641.47   4
  12   6 -16 68488.0 1803.53   6
 -12   6 -18 17815.9 901.313   4
  12   6 -18 19763.9 995.726   6
  12   6 -20 1148.46 314.675   6
 -12  -6 -20 565.207 260.620   5
  12   6 -22 2206.02 364.413   6
 -12  -6 -22 1513.36 317.622   5
  12   6 -24 1382.87 275.427   6
 -12  -6 -24 1277.65 302.916   5
 -12  -6 -26 5892.47 508.857   5
  12   6 -26 4699.13 481.477   6
 -12  -6 -28 209.485 224.393   5
 -12   6 -28-73.0228 263.086   5
  12   6 -28-151.009 221.108   6
 -12  -6 -30 1042.91 235.117   5
 -12   6 -30 833.145 223.946   5
 -12  -6 -32 13906.1 685.060   5
 -12  -6 -34 13881.9 654.963   5
 -12   6 -34 12506.2 598.615   3
  12   8   0 23581.8 1009.78   6
  12   8   2 29552.9 1148.96   6
  12   8  -2 28729.9 1119.18   6
  12   8   4 5199.27 508.497   6
  12   8  -4 4233.50 475.979   6
 -12   8  -6 1699.30 297.167   4
  12   8   6 1401.19 275.194   6
  12   8  -6 1417.89 310.374   6
  12   8  -8 6728.75 605.006   6
 -12   8  -8 7045.57 553.831   4
 -12   8 -10 1457.65 297.613   4
  12   8 -10 1198.20 288.951   6
 -12   8 -12 2503.46 368.155   4
  12   8 -12 2295.84 395.596   6
 -12   8 -14 47336.7 1404.80   4
  12   8 -14 49375.3 1552.95   6
 -12  -8 -16 52305.8 1464.90   5
 -12   8 -16 54244.2 1478.23   4
  12   8 -16 52182.9 1596.13   6
 -12  -8 -18 59523.8 1561.19   5
 -12   8 -18 63022.8 1622.00   4
  12   8 -18 60114.6 1709.37   6
 -12  -8 -20 9627.70 647.437   5
  12   8 -20 9912.65 729.116   6
  12   8 -22-78.1541 242.163   6
 -12  -8 -22-244.347 300.881   5
 -12  -8 -24 7280.61 556.339   5
  12   8 -24 6212.06 560.819   6
  12   8 -26 931.427 247.265   6
 -12  -8 -26 1241.35 269.694   5
  12   8 -28 1214.68 261.047   6
 -12  -8 -28 1407.87 267.394   5
 -12   8 -28 1404.21 275.765   5
 -12  -8 -30 10450.5 610.019   5
 -12  -8 -32 13973.1 677.440   5
 -12   8 -32 15880.1 706.376   3
  12  10   0 30029.9 1154.67   6
 -12  10  -2 13175.8 730.953   4
  12  10  -2 13392.4 798.759   6
  12  10   2 14348.9 815.475   6
  12  10  -4 11082.8 731.381   6
  12  10   4 13571.1 809.816   6
 -12  10  -4 12252.4 693.914   4
 -12  10  -6 728.473 233.388   4
  12  10   6 863.884 269.249   6
  12  10  -6 635.286 242.530   6
 -12  10  -8 202.527 189.317   4
  12  10  -8 154.053 217.341   6
  12  10 -10 5847.65 556.587   6
 -12 -10 -10 5016.23 445.913   5
 -12  10 -10 6527.22 538.014   4
 -12  10 -12 486.801 243.897   4
  12  10 -12 185.930 235.993   6
 -12 -10 -12-190.639 235.057   5
  12  10 -14 16023.0 895.686   6
 -12 -10 -14 15327.5 764.647   5
 -12  10 -14 17158.9 828.342   4
  12  10 -16 70942.3 1862.72   6
 -12 -10 -16 66909.2 1567.58   5
 -12  10 -16 70031.9 1702.26   4
 -12 -10 -18 48509.2 1343.43   5
  12  10 -18 50291.6 1581.42   6
 -12 -10 -20 27967.3 1014.04   5
  12  10 -20 29298.9 1206.45   6
  12  10 -22 564.611 268.790   6
 -12 -10 -22 224.714 235.693   5
 -12 -10 -24 9605.32 611.039   5
  12  10 -24 9477.15 686.416   6
  12  10 -26 1823.12 325.740   6
 -12 -10 -26 2024.14 318.763   5
  12  10 -28 1651.48 288.386   6
 -12 -10 -28 2132.42 316.964   5
 -12 -10 -30 12621.7 661.657   5
 -12  10 -32 14677.9 655.306   3
  12  12   0 16644.0 888.386   6
 -12  12   0 16067.0 792.519   4
  12  12   2 13128.4 805.158   6
  12  12  -2 12712.5 784.733   6
 -12  12  -2 12673.2 708.897   4
 -12  12   2 12876.4 712.805   4
 -12  12  -4 692.574 226.681   4
  12  12   4 1092.00 278.576   6
  12  12  -4 678.072 224.247   6
  12  12  -6 6361.55 584.641   6
 -12  12  -6 6695.65 527.810   4
  12  12  -8 11251.4 771.612   6
 -12 -12  -8 9811.82 564.615   5
 -12  12  -8 11830.3 672.780   4
  12  12 -10 14641.3 871.375   6
 -12 -12 -10 13261.3 653.401   5
 -12  12 -10 15300.0 782.680   4
  12  12 -12 3937.96 471.594   6
 -12 -12 -12 3867.28 376.449   5
 -12  12 -12 3974.83 425.226   4
  12  12 -14 6956.17 618.623   6
 -12 -12 -14 6672.66 491.767   5
 -12  12 -14 6508.58 550.234   4
  12  12 -16 41642.5 1425.00   6
 -12 -12 -16 37337.0 1118.43   5
  12  12 -18 60536.2 1742.28   6
 -12 -12 -18 54597.5 1361.71   5
 -12 -12 -20 4629.22 408.919   5
  12  12 -20 5701.17 559.832   6
  12  12 -22 684.943 249.728   6
 -12 -12 -22 11.8586 272.564   5
 -12 -12 -24 9385.59 589.035   5
  12  12 -24 9726.71 691.929   6
 -12 -12 -26 5663.17 467.501   5
  12  12 -26 5974.34 532.481   6
  12  12 -28-205.751 217.819   6
 -12 -12 -28 103.692 182.557   5
 -12  12 -32 10083.1 533.894   3
  12  14   0 3459.63 429.464   6
 -12  14   0 3235.65 367.156   4
  12  14   2 3993.51 469.590   6
  12  14  -2 3156.61 417.397   6
 -12  14  -2 3480.69 386.432   4
 -12  14   2 3263.08 364.430   4
  12  14  -4 8687.84 657.514   6
 -12  14  -4 9306.82 603.191   4
 -12  14   4 8376.60 563.442   4
  12  14   4 9714.96 729.317   6
  12  14  -6 6396.58 581.284   6
 -12  14  -6 6385.25 503.538   4
 -12  14   6 5697.03 488.849   4
  12  14  -8 16931.3 919.225   6
 -12  14  -8 18114.5 825.205   4
  12  14 -10 35486.5 1336.86   6
 -12  14 -10 36081.4 1204.31   4
  12  14 -12 4289.47 509.608   6
 -12 -14 -12 4475.73 392.791   5
 -12  14 -12 4347.40 435.724   4
  12  14 -14 1047.07 305.325   6
 -12 -14 -14 990.741 227.992   5
  12  14 -16 14448.5 859.659   6
 -12 -14 -16 13760.5 665.038   5
  12  14 -18 12828.8 807.363   6
 -12 -14 -18 11485.0 617.684   5
  12  14 -20 1518.85 318.467   6
 -12 -14 -20 969.463 207.068   5
 -12 -14 -22 5889.56 453.651   5
  12  14 -22 6308.09 560.324   6
 -12 -14 -24 17133.1 753.842   5
  12  14 -24 17102.9 875.674   6
  12  14 -26 13889.8 760.037   6
  12  14 -28 2422.95 314.938   6
 -12  14 -30-273.538 184.137   3
 -12  16   0 1080.92 238.042   4
  12  16   0 991.307 282.503   6
  12  16   2 4138.51 509.874   6
  12  16  -2 3537.92 447.335   6
 -12  16  -2 3319.41 377.045   4
  12  16   4 3855.77 497.615   6
  12  16  -4 3144.68 433.628   6
 -12  16  -4 3208.88 379.769   4
  12  16  -6 17423.3 962.490   6
 -12  16  -6 18149.8 841.061   4
  12  16  -8 42235.2 1464.45   6
  12  16 -10 14600.6 886.284   6
  12  16 -12 9655.42 708.061   6
  12  16 -14 202.025 220.858   6
  12  16 -16 1460.68 310.244   6
 -12 -16 -16 1507.25 235.258   5
  12  16 -18 571.027 234.152   6
 -12 -16 -18 485.051 175.830   5
  12  16 -20 1812.78 333.122   6
  12  16 -22 13763.2 765.890   6
  12  16 -24 29165.1 1059.23   6
  12  16 -26 26741.4 970.091   6
 -12  16 -28 9958.21 514.286   3
  12  18   0 12007.2 838.187   6
  12  18   2 363.774 267.210   6
  12  18  -2 239.077 236.755   6
  12  18  -4 8121.14 666.306   6
  12  18  -6 34750.1 1347.63   6
  12  18  -8 21043.7 1038.57   6
  12  18 -10 15243.0 891.046   6
  12  18 -12 3347.61 452.202   6
  12  18 -14 289.957 219.193   6
  12  18 -16-241.434 233.328   6
  12  18 -18 57.7224 181.188   6
  12  18 -20 5993.75 512.993   6
  12  18 -22 14204.0 739.771   6
  12  18 -24 29194.6 995.145   6
  12  20   0 3001.62 458.733   6
  12  20  -2 3283.45 459.841   6
  12  20  -4 6416.89 617.680   6
  12  20  -6 11805.1 794.418   6
  12  20  -8 22331.2 1062.96   6
  12  20 -10 8105.75 645.870   6
  12  20 -12-287.361 256.190   6
  12  20 -14 1866.57 314.860   6
  12  20 -16 299.895 181.553   6
  12  20 -18-67.7854 179.269   6
  12  20 -20 775.631 204.509   6
  12  20 -22 8684.19 539.306   6
  12  22   0 22330.2 1144.48   6
  12  22  -2 2980.49 430.329   6
  12  22  -4 6.83255 207.066   6
  12  22  -6 8184.86 655.653   6
  12  22  -8 8233.19 633.744   6
  12  22 -10 2676.56 371.379   6
  12  22 -12 375.794 190.222   6
  12  22 -14 3088.44 386.181   6
  12  22 -16 4307.95 416.480   6
  12  22 -18 2656.01 327.523   6
  12  24  -2 14213.5 851.091   6
  12  24  -4 574.141 264.401   6
  12  24  -6 755.758 263.373   6
  12  24  -8 2066.60 326.167   6
  12  24 -10 208.453 166.888   6
  12  24 -12 500.983 201.122   6
  13  -1   1 1111.21 306.690   6
  13  -1  -1 907.598 284.880   6
  13   1   1 724.059 231.880   6
  13   1  -1 785.997 271.287   6
  13  -1   3 10726.0 724.496   6
  13   1   3 10716.8 712.062   6
  13  -1  -3 10303.7 709.385   6
  13   1  -3 10327.4 710.604   6
  13  -1   5 56375.3 1567.47   6
  13   1   5 57799.3 1586.88   6
  13  -1  -5 57383.9 1608.27   6
  13   1  -5 58822.2 1620.08   6
  13   1   7 154046. 2592.00   6
  13  -1  -7 153767. 2585.21   6
  13   1  -7 150046. 2597.39   6
  13  -1  -9 160020. 2675.10   6
  13   1  -9 167670. 2739.68   6
  13  -1 -11 49703.6 1500.67   6
  13   1 -11 49538.2 1510.98   6
 -13   1 -11 50080.7 1483.63   4
 -13  -1 -11 50846.5 1504.20   4
  13  -1 -13 32110.2 1224.79   6
  13   1 -13 31563.5 1226.58   6
 -13   1 -13 32439.1 1208.93   4
 -13  -1 -13 32492.7 1199.80   4
  13  -1 -15 14598.4 835.864   6
 -13   1 -15 12177.4 792.432   4
 -13  -1 -15 12929.4 768.167   4
  13   1 -15 14415.8 847.030   6
 -13   1 -17 8873.06 631.927   4
 -13  -1 -17 8301.82 613.554   4
  13  -1 -17 8876.13 665.441   6
  13   1 -17 8438.09 659.452   6
 -13   1 -19 16676.7 890.958   4
 -13  -1 -19 17558.8 872.557   4
  13  -1 -19 17365.3 926.015   6
  13   1 -19 18534.1 946.693   6
  13  -1 -21 31034.4 1212.41   6
  13   1 -21 32387.1 1216.48   6
  13  -1 -23 35699.1 1231.13   6
  13   1 -23 36730.5 1271.18   6
 -13  -1 -25 82724.7 1905.60   5
 -13   1 -25 83848.6 1906.97   5
 -13  -1 -27 92327.4 1888.87   5
 -13   1 -27 92721.2 1905.01   5
 -13  -1 -29 44483.6 1253.78   5
 -13   1 -29 42976.8 1241.10   5
 -13  -1 -31 9690.76 579.507   5
 -13   1 -31 10443.5 583.914   5
 -13  -1 -33-163.991 178.583   5
 -13   1 -33-127.245 169.973   5
  13  -3   1 8550.40 637.587   6
  13  -3  -1 7493.31 616.030   6
  13   3   1 6848.08 580.594   6
  13   3  -1 6998.46 594.263   6
  13   3  -3 396.493 241.215   6
  13  -3  -3 125.036 230.720   6
  13   3   3-74.7947 238.876   6
  13  -3  -5 32566.2 1236.08   6
  13   3   5 33171.4 1228.74   6
  13   3  -5 32330.0 1218.86   6
  13  -3  -7 52616.7 1522.15   6
  13   3   7 53960.0 1557.82   6
  13   3  -7 50104.8 1512.22   6
  13  -3  -9 30497.1 1195.89   6
  13   3  -9 29838.2 1182.52   6
 -13   3  -9 30157.1 1179.92   4
  13  -3 -11 44937.4 1428.78   6
  13   3 -11 41809.7 1392.50   6
 -13   3 -11 44590.6 1382.35   4
 -13  -3 -11 43431.8 1402.49   4
  13   3 -13-238.216 316.287   6
 -13   3 -13-65.6970 201.108   4
 -13  -3 -13 85.1210 213.845   4
  13  -3 -13 615.597 295.803   6
 -13   3 -15 166.325 212.415   4
 -13  -3 -15 261.709 219.193   4
  13   3 -15-114.601 226.897   6
  13  -3 -15 500.313 290.112   6
 -13   3 -17-47.0755 225.335   4
 -13  -3 -17 34.5552 171.936   4
  13   3 -17 63.1571 232.095   6
  13  -3 -17 515.485 256.914   6
  13   3 -19 32.4762 226.838   6
  13  -3 -19 355.089 252.342   6
 -13   3 -19-106.196 218.636   4
 -13  -3 -19-23.0443 169.736   4
  13   3 -21 3613.96 464.788   6
 -13  -3 -23 50685.1 1502.03   5
  13   3 -23 43983.0 1415.25   6
 -13  -3 -25 28030.9 1098.84   5
  13   3 -25 25117.6 1047.32   6
 -13  -3 -27 31034.4 1096.72   5
 -13   3 -27 27737.2 1085.36   5
 -13  -3 -29 19967.9 851.967   5
 -13   3 -29 18983.0 829.380   5
 -13  -3 -31 120.917 175.464   5
 -13   3 -31 365.586 209.161   5
 -13  -3 -33 2021.26 269.721   5
  13   5   1 29909.5 1157.71   6
  13   5  -1 31270.2 1184.90   6
  13   5   3 3458.76 409.965   6
  13   5  -3 3781.59 451.927   6
  13   5  -5-119.599 223.767   6
  13   5   5 3.03410 256.388   6
  13   5  -7-75.8876 262.147   6
 -13   5  -7 463.191 223.909   4
  13  -5  -7-266.583 280.147   6
  13   5   7 389.825 213.797   6
  13  -5  -9 5420.06 537.988   6
  13   5  -9 4681.00 496.159   6
 -13   5  -9 5474.61 515.630   4
  13  -5 -11 9492.04 662.416   6
 -13   5 -11 7885.34 633.441   4
  13   5 -11 6990.52 613.569   6
 -13  -5 -11 8525.02 639.083   4
  13   5 -13 3498.74 442.042   6
 -13   5 -13 4580.44 463.677   4
 -13  -5 -13 4034.70 450.693   4
 -13   5 -15 32916.5 1182.13   4
 -13  -5 -15 29543.2 1091.93   4
  13   5 -15 32144.6 1258.42   6
 -13   5 -17 34847.6 1228.21   4
  13   5 -17 35973.6 1335.89   6
 -13   5 -19 19107.3 927.423   4
  13   5 -19 18255.2 961.099   6
  13   5 -21 679.177 267.714   6
 -13  -5 -21 1030.07 328.732   5
  13   5 -23-17.1109 216.417   6
 -13  -5 -23 191.338 275.081   5
 -13  -5 -25 16190.7 817.084   5
  13   5 -25 14874.8 823.560   6
 -13  -5 -27 1593.60 309.504   5
 -13   5 -27 1944.50 355.113   5
  13   5 -27 1465.68 294.933   6
 -13  -5 -29 6790.30 507.666   5
 -13   5 -29 6512.49 513.669   5
 -13  -5 -31 8537.22 540.876   5
 -13   5 -31 6299.72 471.850   5
 -13  -5 -33 23504.4 832.363   5
  13   7   1 46773.4 1453.53   6
  13   7  -1 46140.9 1420.20   6
  13   7   3 39822.8 1350.61   6
  13   7  -3 38249.5 1322.39   6
 -13   7  -5 15502.6 829.536   4
  13   7   5 16617.2 897.447   6
  13   7  -5 15647.0 868.930   6
 -13   7  -7 278.031 206.429   4
  13   7  -7 446.990 269.586   6
  13   7   7 302.345 197.187   6
 -13   7  -9 23207.6 983.182   4
  13   7  -9 22864.1 1041.30   6
 -13   7 -11 6971.63 568.742   4
  13   7 -11 7463.51 619.855   6
 -13  -7 -11 6945.71 558.740   4
 -13   7 -13 29968.9 1124.74   4
  13   7 -13 31100.1 1250.38   6
 -13   7 -15 95226.8 2014.98   4
  13   7 -15 94288.2 2144.16   6
 -13  -7 -17 113987. 2217.80   5
  13   7 -17 111207. 2318.80   6
 -13  -7 -19 53729.9 1504.66   5
  13   7 -19 50551.0 1578.25   6
 -13  -7 -21 35100.3 1216.81   5
  13   7 -21 32844.3 1277.32   6
  13   7 -23 2539.79 386.388   6
 -13  -7 -23 2603.76 373.113   5
  13   7 -25-207.938 257.062   6
 -13  -7 -25 119.061 230.622   5
 -13  -7 -27 2218.70 329.265   5
 -13   7 -27 2103.73 334.600   5
  13   7 -27 1873.52 311.503   6
 -13  -7 -29 23684.9 894.163   5
 -13   7 -29 20705.6 828.754   5
 -13  -7 -31 46364.3 1195.34   5
  13   9   1 62229.7 1691.93   6
  13   9  -1 60927.7 1649.75   6
  13   9   3 45920.5 1464.98   6
  13   9  -3 43198.4 1405.49   6
 -13   9  -3 43847.2 1360.30   4
 -13   9  -5 20188.2 915.710   4
  13   9  -5 19105.7 943.830   6
 -13   9  -7 31461.3 1128.39   4
  13   9  -7 29313.1 1169.30   6
 -13   9  -9 47.5222 196.656   4
  13   9  -9 100.315 213.146   6
 -13   9 -11 2523.04 362.938   4
  13   9 -11 2717.46 425.191   6
 -13  -9 -13 42705.0 1282.30   5
 -13   9 -13 46139.7 1359.81   4
  13   9 -13 43845.9 1476.06   6
 -13  -9 -15 96844.9 1926.96   5
 -13   9 -15 103557. 2055.10   4
  13   9 -15 98639.5 2210.89   6
 -13  -9 -17 134478. 2280.84   5
 -13   9 -17 139655. 2398.54   4
  13   9 -17 137530. 2590.05   6
 -13  -9 -19 104626. 1995.39   5
  13   9 -19 108351. 2273.55   6
 -13  -9 -21 23154.7 937.150   5
  13   9 -21 22880.2 1040.35   6
  13   9 -23 2599.77 385.657   6
 -13  -9 -23 2749.65 351.586   5
 -13  -9 -25 4661.91 428.033   5
  13   9 -25 4110.40 446.376   6
 -13  -9 -27 4630.57 428.362   5
 -13   9 -27 3708.99 407.208   5
  13   9 -27 3565.46 400.247   6
 -13  -9 -29 17451.5 767.277   5
 -13  -9 -31 45427.2 1156.52   5
 -13   9 -31 43589.1 1101.78   3
  13  11   1 40763.9 1385.06   6
 -13  11  -1 38376.7 1218.00   4
  13  11  -1 36703.0 1321.96   6
 -13  11   1 38530.0 1240.46   4
 -13  11  -3 17396.0 834.184   4
  13  11   3 18061.4 948.306   6
  13  11  -3 15841.1 870.251   6
 -13  11  -5 39004.8 1236.66   4
  13  11   5 41277.9 1422.48   6
  13  11  -5 38245.3 1347.07   6
 -13  11  -7 508.828 235.799   4
  13  11  -7 608.461 285.133   6
 -13 -11  -9 8036.85 534.879   5
 -13  11  -9 9586.84 648.951   4
  13  11  -9 8690.55 677.946   6
  13  11 -11 981.862 320.909   6
 -13 -11 -11 968.356 246.584   5
 -13  11 -11 1194.88 280.963   4
 -13 -11 -13 12669.8 673.967   5
 -13  11 -13 13877.7 779.134   4
  13  11 -13 13083.3 844.658   6
 -13 -11 -15 51796.1 1327.41   5
 -13  11 -15 56481.1 1534.09   4
  13  11 -15 54408.1 1662.98   6
 -13 -11 -17 74087.2 1592.01   5
  13  11 -17 78845.2 1967.54   6
 -13 -11 -19 56761.1 1393.52   5
  13  11 -19 61760.9 1709.42   6
 -13 -11 -21 7067.15 512.804   5
  13  11 -21 7972.27 639.666   6
  13  11 -23-252.687 196.958   6
 -13 -11 -23-511.809 249.315   5
  13  11 -25-225.329 202.769   6
 -13 -11 -25 302.817 219.406   5
  13  11 -27 434.551 181.138   6
 -13 -11 -27 884.024 249.077   5
 -13 -11 -29 4106.46 386.568   5
  13  13  -1 2299.26 372.553   6
 -13  13  -1 2457.98 340.980   4
 -13  13   1 2512.19 344.820   4
  13  13   1 2870.18 426.301   6
 -13  13  -3 10693.2 656.610   4
 -13  13   3 10105.5 633.063   4
  13  13   3 10346.8 756.686   6
  13  13  -3 10361.7 734.547   6
 -13  13  -5 1439.32 279.997   4
 -13  13   5 1034.83 257.388   4
  13  13  -5 1441.33 331.419   6
  13  13  -7 21841.9 1054.26   6
 -13  13  -7 22472.6 939.428   4
 -13  13   7 20230.3 892.912   4
  13  13  -9 22464.1 1058.12   6
 -13  13  -9 23254.8 946.575   4
  13  13 -11 12411.4 827.337   6
 -13  13 -11 12227.6 731.588   4
  13  13 -13 2619.19 433.993   6
 -13 -13 -13 2328.18 307.449   5
 -13 -13 -15 3568.12 367.611   5
  13  13 -15 3797.48 490.892   6
 -13 -13 -17 18861.4 777.658   5
  13  13 -17 20827.3 1002.36   6
 -13 -13 -19 3781.43 372.676   5
  13  13 -19 4452.59 516.673   6
  13  13 -21 433.832 299.691   6
 -13 -13 -21-71.7234 184.565   5
 -13 -13 -23 11329.2 625.427   5
  13  13 -23 11107.2 693.254   6
 -13 -13 -25 20766.7 813.524   5
  13  13 -25 19073.7 861.375   6
  13  13 -27 6904.15 506.335   6
 -13  15  -1 262.628 170.166   4
 -13  15   1 215.808 145.034   4
  13  15   1-41.4013 240.213   6
  13  15  -1 244.617 219.574   6
  13  15  -3 5423.14 562.306   6
 -13  15  -3 5954.25 487.306   4
 -13  15   3 5213.40 453.566   4
  13  15   3 6187.04 619.939   6
  13  15  -5 35324.2 1337.55   6
 -13  15  -5 35044.5 1145.62   4
  13  15  -7 61834.5 1780.65   6
 -13  15  -7 64209.4 1570.34   4
  13  15  -9 42532.1 1458.91   6
 -13  15  -9 43293.7 1274.76   4
  13  15 -11 33949.6 1328.45   6
  13  15 -13 22415.2 1048.53   6
  13  15 -15 2118.60 369.511   6
  13  15 -17 359.601 233.530   6
 -13 -15 -17 193.617 150.717   5
  13  15 -19 2496.02 371.143   6
 -13 -15 -19 2285.99 279.722   5
 -13 -15 -21 17928.9 730.033   5
  13  15 -21 20340.0 931.821   6
  13  15 -23 47682.8 1334.28   6
  13  15 -25 48054.1 1277.60   6
  13  17   1 2236.84 403.919   6
  13  17  -1 2188.54 403.448   6
 -13  17  -1 2033.77 303.136   4
  13  17  -3 20137.1 1046.92   6
 -13  17  -3 19111.2 838.110   4
  13  17  -5 39490.1 1447.74   6
  13  17  -7 43703.9 1473.18   6
  13  17  -9 59482.4 1707.96   6
  13  17 -11 35935.9 1314.04   6
  13  17 -13 11139.3 754.565   6
  13  17 -15 4512.78 480.446   6
  13  17 -17 6196.11 531.163   6
  13  17 -19 10710.4 673.220   6
  13  17 -21 27291.2 1012.46   6
  13  17 -23 50654.3 1291.25   6
  13  19   1 39.6820 218.327   6
  13  19  -1-49.2199 213.408   6
  13  19  -3 6302.04 603.813   6
  13  19  -5 10258.4 741.068   6
  13  19  -7 28610.6 1210.13   6
  13  19  -9 30699.1 1221.78   6
  13  19 -11 12668.7 793.545   6
  13  19 -13 887.742 250.398   6
  13  19 -15 440.267 209.057   6
  13  19 -17 846.085 228.952   6
  13  19 -19 3633.04 374.121   6
  13  21  -1 9032.07 717.468   6
  13  21  -3 4484.15 511.550   6
  13  21  -5 4861.02 498.614   6
  13  21  -7 4592.30 497.587   6
  13  21  -9 4431.85 478.640   6
  13  21 -11 862.624 234.842   6
  13  21 -13 523.945 213.304   6
  13  21 -15 5857.66 482.095   6
  14   0   0 3705.68 455.882   6
  14   0   2 7581.76 610.679   6
  14   0  -2 7871.92 622.425   6
  14   0   4 45940.2 1421.90   6
  14   0  -4 45736.6 1448.38   6
  14   0  -6 149615. 2593.52   6
  14   0  -8 224132. 3172.35   6
  14   0 -10 113085. 2274.72   6
 -14   0 -10 118115. 2276.24   4
  14   0 -12 93361.9 2098.23   6
 -14   0 -12 100316. 2084.69   4
  14   0 -14 16965.0 914.371   6
 -14   0 -14 16226.1 851.266   4
 -14   0 -16 26620.8 1130.20   4
  14   0 -16 30043.9 1188.01   6
 -14   0 -18 36597.3 1248.99   4
  14   0 -18 35134.2 1278.87   6
  14   0 -20 24832.9 1060.94   6
  14   0 -22 61592.4 1608.42   6
 -14   0 -24 82297.6 1886.13   5
 -14   0 -26 65876.3 1592.58   5
 -14   0 -28 86843.8 1704.81   5
 -14   0 -30 21246.4 806.883   5
  14  -2   0 182.534 229.991   6
  14   2   0 199.467 223.703   6
  14  -2  -2 2835.75 412.215   6
  14   2   2 2458.94 382.347   6
  14   2  -2 2417.50 387.531   6
  14  -2  -4 27348.5 1122.74   6
  14   2   4 25957.3 1083.10   6
  14   2  -4 25364.8 1090.47   6
  14   2   6 77189.6 1879.97   6
  14   2  -6 80512.8 1935.19   6
  14  -2  -8 104887. 2204.67   6
  14   2  -8 102146. 2165.91   6
 -14   2  -8 107072. 2186.07   4
  14  -2 -10 117836. 2349.12   6
  14   2 -10 113876. 2289.10   6
 -14  -2 -10 117943. 2288.16   4
  14  -2 -12 18893.2 965.883   6
  14   2 -12 17176.2 921.477   6
 -14   2 -12 16956.2 913.367   4
 -14  -2 -12 17569.7 919.719   4
  14  -2 -14 21762.5 1030.17   6
 -14   2 -14 22820.4 1025.88   4
  14   2 -14 22486.8 1060.29   6
 -14  -2 -14 20416.9 970.983   4
 -14   2 -16 3282.48 445.940   4
  14  -2 -16 3305.03 453.405   6
 -14  -2 -16 3584.28 447.924   4
  14   2 -16 3361.20 443.524   6
 -14   2 -18 2735.52 414.079   4
 -14  -2 -18 3072.67 402.520   4
  14  -2 -18 2799.06 413.796   6
  14   2 -18 2494.70 408.317   6
  14   2 -20 25264.5 1079.60   6
 -14  -2 -22 33339.7 1250.46   5
  14   2 -22 29246.8 1125.23   6
 -14  -2 -24 44617.9 1357.69   5
  14   2 -24 35755.8 1227.08   6
 -14  -2 -26 73783.5 1656.15   5
 -14   2 -26 72290.9 1667.09   5
 -14  -2 -28 27832.6 988.554   5
 -14   2 -28 26602.8 976.389   5
 -14  -2 -30 14598.3 673.069   5
 -14   2 -30 12583.4 637.149   5
  14   4   0 15592.2 846.671   6
  14   4   2 6067.94 548.338   6
  14   4  -2 6195.29 566.976   6
  14   4  -4 1183.57 325.051   6
  14   4   4 648.990 230.002   6
 -14   4  -6 3512.51 463.885   4
  14   4   6 4023.16 475.404   6
  14   4  -6 3287.24 438.122   6
  14   4   8 21536.6 1053.73   6
  14   4  -8 20937.3 1020.59   6
 -14   4  -8 23406.8 1027.39   4
  14   4 -10 1430.40 285.308   6
 -14   4 -10 2016.62 371.727   4
 -14  -4 -10 2135.78 387.008   4
  14   4 -12 2510.49 394.198   6
 -14   4 -12 2849.71 405.496   4
 -14  -4 -12 3472.89 429.292   4
  14   4 -14 2725.87 438.490   6
 -14   4 -14 2528.40 395.855   4
 -14  -4 -14 3026.35 415.312   4
 -14   4 -16 16115.8 866.044   4
 -14  -4 -16 14470.8 792.623   4
  14   4 -16 16593.3 919.312   6
 -14   4 -18 11587.4 748.880   4
  14   4 -18 9662.78 724.469   6
 -14  -4 -20 2338.19 463.747   5
  14   4 -20 1471.18 341.545   6
 -14  -4 -22 2001.45 392.949   5
  14   4 -22 1210.57 297.575   6
 -14  -4 -24 20903.7 925.114   5
  14   4 -24 18574.0 879.437   6
 -14  -4 -26 8778.66 589.679   5
 -14   4 -26 8731.90 629.344   5
  14   4 -26 7333.45 546.499   6
 -14  -4 -28 2429.97 338.199   5
 -14   4 -28 2499.17 355.329   5
 -14  -4 -30 2797.89 350.110   5
  14   6   0 52420.0 1538.00   6
  14   6   2 43258.0 1404.82   6
  14   6  -2 43919.5 1418.71   6
 -14   6  -4 23952.1 1024.60   4
  14   6   4 22907.4 1031.20   6
  14   6  -4 22665.0 1040.95   6
  14   6  -6 949.463 254.619   6
 -14   6  -6 1346.81 285.393   4
  14   6   6 1370.17 300.281   6
  14   6  -8 14338.5 846.604   6
 -14   6  -8 15484.6 829.877   4
 -14   6 -10 1065.40 274.687   4
  14   6 -10 714.137 228.924   6
 -14   6 -12 14818.0 829.640   4
  14   6 -12 14326.2 845.364   6
 -14  -6 -12 15953.4 826.323   4
 -14   6 -14 49494.7 1456.35   4
  14   6 -14 48919.4 1532.59   6
 -14   6 -16 64917.1 1664.01   4
  14   6 -16 64862.9 1764.23   6
 -14  -6 -18 79777.4 1874.63   5
 -14   6 -18 73506.3 1795.52   4
  14   6 -18 74608.4 1881.44   6
 -14  -6 -20 61754.5 1600.61   5
  14   6 -20 57572.6 1628.73   6
 -14  -6 -22 5069.20 508.861   5
  14   6 -22 4349.12 464.480   6
 -14  -6 -24-186.687 213.516   5
  14   6 -24-104.044 193.596   6
 -14  -6 -26 93.8005 185.887   5
 -14   6 -26 277.651 216.764   5
  14   6 -26 92.3374 158.586   6
 -14  -6 -28 10357.2 594.403   5
 -14   6 -28 9214.27 564.723   5
 -14  -6 -30 28530.3 922.507   5
  14   8   0 103459. 2162.52   6
 -14   8  -2 68214.8 1704.77   4
  14   8   2 71105.2 1805.56   6
  14   8  -2 66581.2 1740.22   6
  14   8   4 39543.4 1388.65   6
  14   8  -4 37076.3 1309.21   6
 -14   8  -4 38425.7 1272.43   4
  14   8   6 59701.7 1701.11   6
 -14   8  -6 59446.9 1562.49   4
  14   8  -8 3531.87 437.295   6
 -14   8  -8 4280.63 446.931   4
 -14   8 -10 13838.5 772.544   4
  14   8 -10 12999.2 808.858   6
 -14  -8 -12 22633.9 956.737   5
 -14   8 -12 22130.0 997.552   4
  14   8 -12 22997.6 1061.37   6
 -14  -8 -14 74914.2 1737.46   5
 -14   8 -14 79982.6 1799.78   4
  14   8 -14 75975.1 1900.94   6
 -14  -8 -16 125145. 2219.66   5
 -14   8 -16 133675. 2387.54   4
  14   8 -16 130218. 2474.80   6
 -14  -8 -18 134447. 2254.71   5
  14   8 -18 131510. 2494.61   6
 -14  -8 -20 62493.0 1530.42   5
  14   8 -20 64166.7 1702.24   6
 -14  -8 -22 25090.4 963.976   5
  14   8 -22 25183.2 1055.17   6
 -14  -8 -24 4798.62 439.390   5
  14   8 -24 4585.60 454.825   6
 -14  -8 -26 3929.80 403.464   5
 -14   8 -26 3797.23 407.359   5
  14   8 -26 2896.65 348.638   6
 -14  -8 -28 15650.6 715.289   5
  14  10   0 50205.6 1534.11   6
 -14  10   0 48831.7 1394.05   4
 -14  10   2 52201.6 1457.21   4
  14  10   2 54545.5 1623.01   6
  14  10  -2 53752.6 1574.43   6
 -14  10  -2 57348.0 1505.88   4
 -14  10  -4 59781.9 1555.68   4
  14  10  -4 60204.6 1664.13   6
 -14  10  -6 11639.6 698.316   4
  14  10  -6 10440.0 745.514   6
 -14  10  -8 1271.37 285.896   4
  14  10  -8 1271.71 302.398   6
 -14 -10  -8 1095.85 243.134   5
 -14  10 -10 186.160 185.842   4
  14  10 -10 329.892 227.455   6
 -14 -10 -10 78.9458 186.255   5
 -14 -10 -12 15433.2 741.293   5
  14  10 -12 17116.6 932.190   6
 -14 -10 -14 47331.1 1278.69   5
  14  10 -14 50231.2 1547.23   6
 -14 -10 -16 105217. 1891.43   5
  14  10 -16 115241. 2287.27   6
 -14 -10 -18 75346.8 1609.47   5
  14  10 -18 79706.4 1913.71   6
 -14 -10 -20 34746.8 1081.99   5
  14  10 -20 34600.1 1234.25   6
 -14 -10 -22 10692.9 613.611   5
  14  10 -22 12117.0 732.242   6
 -14 -10 -24 3484.25 370.763   5
  14  10 -24 3796.91 420.500   6
 -14 -10 -26 2641.19 334.104   5
  14  10 -26 1216.90 241.423   6
 -14  12   0 9715.15 620.529   4
  14  12   0 10599.1 735.861   6
 -14  12  -2 15709.1 783.979   4
  14  12   2 17465.1 951.180   6
 -14  12   2 14815.4 766.377   4
  14  12  -2 16870.0 916.138   6
 -14  12   4 1752.82 286.110   4
  14  12  -4 2538.77 409.016   6
 -14  12  -4 2415.10 349.664   4
  14  12   4 2846.72 456.181   6
 -14  12  -6 4139.87 432.428   4
  14  12  -6 4067.80 492.955   6
 -14  12   6 3298.13 381.059   4
  14  12  -8 15993.2 895.228   6
 -14  12   8 14533.4 766.686   4
 -14  12  10 3852.28 392.677   4
 -14  12 -10 5339.41 489.077   4
  14  12 -10 4932.63 516.752   6
  14  12 -12 1433.52 352.752   6
 -14 -12 -12 1362.20 252.967   5
 -14  12 -12 1992.69 353.599   4
 -14 -12 -14 9208.59 554.294   5
  14  12 -14 10167.6 738.566   6
 -14 -12 -16 13921.9 668.741   5
  14  12 -16 15137.4 879.020   6
 -14 -12 -18 18914.1 778.675   5
  14  12 -18 20806.2 968.167   6
 -14 -12 -20 3223.50 347.255   5
  14  12 -20 3089.30 404.149   6
  14  12 -22 1795.57 329.908   6
 -14 -12 -22 1668.64 298.061   5
 -14 -12 -24 4962.12 422.344   5
  14  12 -24 4789.88 457.320   6
 -14  14   0 1311.66 263.043   4
  14  14   0 1239.95 300.123   6
 -14  14  -2 1791.62 309.821   4
  14  14  -2 2171.81 385.414   6
 -14  14   2 2231.02 316.862   4
  14  14   2 2910.78 454.504   6
 -14  14  -4 20178.8 886.974   4
 -14  14   4 19133.2 846.339   4
  14  14  -4 20270.3 1014.56   6
 -14  14  -6 47392.4 1337.64   4
  14  14  -6 45874.6 1503.03   6
 -14  14  -8 55035.3 1440.87   4
  14  14  -8 49507.4 1559.04   6
  14  14 -10 34884.1 1302.15   6
  14  14 -12 14125.8 846.812   6
  14  14 -14 10211.4 720.457   6
  14  14 -16 230.842 246.996   6
  14  14 -18 2131.32 356.140   6
 -14 -14 -18 1643.55 251.500   5
 -14 -14 -20 5721.63 423.866   5
  14  14 -20 7374.98 566.672   6
  14  14 -22 29107.6 1030.23   6
 -14  16   0 3132.01 351.851   4
  14  16   0 4030.12 483.850   6
 -14  16  -2 10479.7 642.746   4
  14  16   2 12503.1 821.171   6
  14  16  -2 12386.7 804.189   6
 -14  16  -4 33835.7 1114.74   4
  14  16  -4 35620.5 1316.37   6
  14  16  -6 52467.6 1582.44   6
  14  16  -8 65818.7 1742.20   6
  14  16 -10 56779.2 1606.55   6
  14  16 -12 32557.0 1214.53   6
  14  16 -14 8949.16 628.771   6
  14  16 -16 9851.15 641.034   6
  14  16 -18 7168.40 546.822   6
  14  16 -20 26193.3 965.156   6
  14  18   0 1033.19 287.993   6
  14  18  -2 2161.95 370.029   6
  14  18  -4 12178.1 791.472   6
  14  18  -6 25840.0 1122.03   6
  14  18  -8 37670.9 1298.23   6
  14  18 -10 40232.8 1311.87   6
  14  18 -12 12242.5 744.100   6
  14  18 -14 3625.84 405.008   6
  14  18 -16 503.492 175.813   6
  14  18 -18 3972.32 381.811   6
  14  20  -2 2102.57 350.440   6
  14  20  -4-169.321 237.679   6
  14  20  -6 3189.06 408.866   6
  14  20  -8 11014.1 699.912   6
  14  20 -10 5738.48 495.196   6
  14  20 -12 1510.47 277.490   6
  15   1   1 378.742 181.702   6
  15   1  -1 572.336 222.068   6
  15   1   3 3943.14 450.704   6
  15  -1  -3 4735.59 504.801   6
  15   1  -3 4358.29 485.720   6
  15  -1  -5 41260.7 1360.43   6
  15   1  -5 40160.8 1344.64   6
 -15  -1  -7 60073.0 1652.60   4
  15  -1  -7 56164.2 1599.28   6
  15   1  -7 54561.4 1592.84   6
 -15   1  -7 56219.6 1618.34   4
  15  -1  -9 66089.0 1726.10   6
  15   1  -9 65811.2 1726.59   6
 -15   1  -9 67848.4 1724.85   4
 -15  -1  -9 63752.2 1694.69   4
  15  -1 -11 38178.2 1331.08   6
  15   1 -11 36521.2 1305.06   6
 -15   1 -11 36105.2 1297.14   4
 -15  -1 -11 35676.8 1276.35   4
 -15   1 -13 3178.51 415.056   4
 -15  -1 -13 2807.61 389.159   4
  15  -1 -13 3119.16 415.552   6
  15   1 -13 2883.19 411.016   6
 -15   1 -15 1498.62 306.534   4
 -15  -1 -15 1098.92 283.455   4
  15  -1 -15 765.815 238.181   6
  15   1 -15 1022.76 258.389   6
  15  -1 -17-136.027 241.857   6
  15   1 -17-248.888 274.416   6
 -15   1 -17 318.070 211.538   4
 -15  -1 -17-14.7889 185.893   4
  15   1 -19 6147.56 545.713   6
 -15  -1 -21 19225.8 934.775   5
  15   1 -21 15517.9 808.656   6
 -15  -1 -23 31141.5 1124.63   5
 -15   1 -23 33708.1 1182.33   5
 -15  -1 -25 30772.3 1044.75   5
 -15   1 -25 31315.2 1071.63   5
 -15  -1 -27 17815.4 754.730   5
 -15   1 -27 17193.2 742.352   5
  15   3   1 6268.41 558.881   6
  15   3  -1 6587.83 578.404   6
  15   3   3 532.413 228.125   6
  15   3  -3 421.996 235.021   6
 -15   3  -5 2382.93 356.622   4
  15   3   5 2861.89 401.276   6
  15   3  -5 3103.39 425.257   6
  15   3  -7 33474.5 1240.55   6
 -15   3  -7 32412.3 1218.11   4
  15   3  -9 24453.8 1079.20   6
 -15   3  -9 24926.9 1049.89   4
 -15  -3  -9 25818.2 1097.08   4
  15   3 -11 3501.41 444.113   6
 -15   3 -11 3667.60 441.199   4
 -15  -3 -11 3529.02 445.171   4
 -15   3 -13 3361.09 420.258   4
 -15  -3 -13 3304.81 427.052   4
  15   3 -13 2897.24 409.587   6
 -15   3 -15 7376.24 605.242   4
 -15  -3 -15 8376.15 607.217   4
  15   3 -15 7487.00 601.519   6
 -15   3 -17 3111.54 449.574   4
 -15  -3 -17 2932.31 394.337   4
  15   3 -17 2053.50 340.047   6
 -15  -3 -19 1256.08 354.187   5
  15   3 -19 773.533 276.976   6
 -15  -3 -21 2304.42 401.402   5
  15   3 -21 1650.30 315.628   6
 -15  -3 -23 9174.38 628.047   5
  15   3 -23 7765.83 553.250   6
 -15  -3 -25 17700.5 785.789   5
 -15   3 -25 17391.1 802.512   5
 -15  -3 -27 10301.3 571.548   5
 -15   3 -27 9504.15 567.236   5
  15   5   1 29852.1 1165.02   6
  15   5  -1 27021.1 1105.14   6
 -15   5  -3 13417.8 765.571   4
  15   5   3 13657.7 805.127   6
  15   5  -3 13892.6 807.322   6
 -15   5  -5 322.478 204.663   4
  15   5   5 782.615 249.469   6
  15   5  -5 450.385 246.493   6
 -15   5  -7 582.283 231.867   4
  15   5  -7 867.597 294.681   6
  15   5  -9 1084.33 292.959   6
 -15   5  -9 1010.31 270.216   4
 -15  -5  -9 900.948 251.068   4
 -15   5 -11 2885.26 389.391   4
 -15  -5 -11 2708.93 387.247   4
  15   5 -11 2830.41 413.857   6
 -15   5 -13 11380.2 735.554   4
 -15  -5 -13 10582.3 700.507   4
  15   5 -13 12155.6 765.675   6
 -15   5 -15 13254.8 790.349   4
  15   5 -15 13444.4 815.998   6
 -15  -5 -17 43196.8 1379.71   5
 -15   5 -17 45165.7 1374.70   4
  15   5 -17 41525.1 1359.65   6
 -15  -5 -19 26798.1 1061.00   5
  15   5 -19 22419.7 994.278   6
 -15  -5 -21 2373.98 360.614   5
  15   5 -21 1967.42 330.558   6
 -15  -5 -23 179.816 184.491   5
  15   5 -23 343.616 177.440   6
 -15  -5 -25 2080.61 310.707   5
 -15   5 -25 1576.17 305.160   5
  15   5 -25 1312.90 246.757   6
 -15  -5 -27 443.016 205.020   5
 -15   7  -1 46257.2 1407.58   4
  15   7   1 45665.0 1452.55   6
  15   7  -1 46451.2 1450.97   6
  15   7   3 17198.8 906.162   6
  15   7  -3 17518.8 917.641   6
 -15   7  -3 18787.4 887.735   4
  15   7   5 7837.91 626.806   6
  15   7  -5 7502.18 616.194   6
 -15   7  -5 8034.75 594.066   4
 -15  -7  -7 3914.83 450.312   4
  15   7  -7 3691.10 476.427   6
 -15   7  -7 3552.35 413.592   4
 -15   7  -9 4072.80 450.376   4
  15   7  -9 3386.10 450.762   6
 -15  -7  -9 3197.43 422.417   4
 -15   7 -11 3493.89 427.419   4
  15   7 -11 3110.83 441.886   6
 -15  -7 -13 9995.79 639.362   5
 -15   7 -13 11142.6 697.229   4
  15   7 -13 9968.35 703.286   6
 -15  -7 -15 43070.1 1292.37   5
 -15   7 -15 42372.8 1333.14   4
  15   7 -15 45476.8 1427.32   6
 -15  -7 -17 58698.1 1494.73   5
  15   7 -17 57304.8 1576.92   6
 -15  -7 -19 49712.0 1351.39   5
  15   7 -19 47168.5 1426.68   6
 -15  -7 -21 16301.1 767.859   5
  15   7 -21 14916.3 786.263   6
 -15  -7 -23-354.971 215.470   5
  15   7 -23-392.772 206.011   6
 -15  -7 -25-131.276 202.425   5
 -15   7 -25 38.8967 189.204   5
  15   9   1 30553.0 1193.24   6
  15   9  -1 28209.0 1148.03   6
 -15   9  -1 29624.9 1084.58   4
 -15   9   1 28761.2 1065.46   4
  15   9   3 28423.7 1168.11   6
  15   9  -3 27899.8 1131.08   6
 -15   9  -3 29971.4 1087.25   4
 -15   9  -5 6106.35 517.089   4
  15   9  -5 6114.12 570.359   6
 -15   9  -7 3625.61 405.744   4
  15   9  -7 3297.16 435.910   6
 -15   9  -9 40.1189 167.524   4
  15   9  -9-82.6745 237.463   6
 -15  -9  -9-367.077 219.661   5
  15   9 -11-49.7237 219.674   6
 -15   9 -11 229.787 180.223   4
 -15   9 -13 18645.9 880.669   4
  15   9 -13 17550.8 897.680   6
 -15  -9 -15 34722.3 1080.05   5
  15   9 -15 35817.2 1271.23   6
 -15  -9 -17 44907.8 1223.26   5
  15   9 -17 48444.7 1438.28   6
 -15  -9 -19 35777.4 1073.87   5
  15   9 -19 34950.2 1216.20   6
 -15  -9 -21 6858.12 491.099   5
  15   9 -21 6822.81 545.426   6
 -15  -9 -23 2032.30 286.264   5
  15   9 -23 1856.07 284.097   6
  15  11   1 15479.8 882.602   6
 -15  11  -1 14994.7 758.723   4
  15  11  -1 15328.7 862.119   6
 -15  11   1 14133.7 730.708   4
 -15  11  -3 5027.84 453.018   4
  15  11   3 5626.09 540.776   6
  15  11  -3 5298.36 527.381   6
 -15  11   3 4492.62 422.941   4
 -15  11  -5 1934.53 310.028   4
  15  11  -5 1683.45 349.100   6
 -15  11   5 1209.19 245.123   4
 -15  11  -7 10342.2 639.356   4
  15  11  -7 10055.6 693.881   6
  15  11  -9 7262.77 610.831   6
 -15  11   9 6528.35 502.638   4
  15  11 -11 68.2006 205.329   6
 -15  11  11-337.186 202.457   4
 -15  11 -11 187.434 207.544   4
  15  11 -13 211.643 220.989   6
 -15  11  13-130.838 184.911   4
 -15 -11 -13 72.8650 146.008   5
 -15 -11 -15 14652.2 657.743   5
  15  11 -15 19381.7 914.193   6
 -15 -11 -17 16522.2 702.916   5
  15  11 -17 19189.1 910.610   6
  15  11 -19 2327.46 339.778   6
 -15 -11 -19 2161.58 283.442   5
  15  11 -21 1562.51 283.896   6
 -15 -11 -21 1366.93 248.472   5
 -15  13  -1 3205.61 365.841   4
 -15  13   1 3000.87 359.235   4
  15  13   1 3398.33 450.870   6
  15  13  -1 3135.39 432.048   6
 -15  13  -3 2557.72 329.709   4
 -15  13   3 2846.59 349.591   4
  15  13  -3 2717.98 418.350   6
 -15  13  -5 19036.9 830.412   4
 -15  13   5 16710.5 774.225   4
  15  13  -5 17943.8 933.445   6
 -15  13  -7 22958.7 909.980   4
  15  13  -7 22933.7 1027.07   6
 -15  13  -9 25243.5 959.610   4
  15  13  -9 20670.5 995.504   6
  15  13 -11 14663.1 834.281   6
  15  13 -13 175.376 194.888   6
  15  13 -15 275.280 213.807   6
  15  13 -17 221.951 191.291   6
  15  13 -19 141.254 162.829   6
  15  13 -21 9141.10 564.544   6
  15  15   1-153.770 212.838   6
  15  15  -1-10.8178 194.972   6
 -15  15  -1 28.4745 131.325   4
 -15  15   1 360.839 164.386   4
 -15  15  -3 6952.10 504.469   4
  15  15  -3 7014.95 589.122   6
 -15  15  -5 15965.0 738.977   4
  15  15  -5 16197.8 869.725   6
  15  15  -7 33582.1 1227.45   6
  15  15  -9 45193.2 1384.57   6
  15  15 -11 16997.6 849.808   6
  15  15 -13 4246.81 448.385   6
  15  15 -15 634.185 222.852   6
  15  15 -17 1405.60 270.540   6
  15  17  -1 214.590 193.101   6
  15  17  -3 160.411 203.708   6
  15  17  -5 9517.41 667.558   6
  15  17  -7 23824.7 1028.38   6
  15  17  -9 21470.9 943.235   6
  15  17 -11 14063.4 763.474   6
  15  17 -13 4383.48 422.786   6
 -16   0  -6 2507.26 369.009   4
  16   0  -6 3532.44 427.099   6
  16   0  -8 11724.1 742.312   6
 -16   0  -8 11892.8 754.485   4
 -16   0 -10 350.306 207.668   4
  16   0 -10 32.1346 192.567   6
 -16   0 -12 98.9111 173.640   4
  16   0 -12-401.510 258.983   6
 -16   0 -14 470.747 198.164   4
 -16   0 -16 27199.9 1052.57   4
 -16   0 -20 595.633 262.117   5
 -16   0 -22 1209.13 266.330   5
 -16   0 -24 2241.53 305.134   5
  16   2   0 29757.1 1140.61   6
  16   2  -2 6123.98 543.899   6
  16   2  -4 9356.48 661.159   6
 -16   2  -4 8535.23 617.761   4
  16   2  -6 7558.76 617.453   6
 -16   2  -6 6791.97 562.486   4
 -16  -2  -6 8152.45 613.783   4
 -16   2  -8-280.729 241.502   4
 -16  -2  -8 180.361 196.063   4
  16   2  -8 255.177 214.367   6
  16   2 -10 5382.88 512.908   6
 -16   2 -10 4921.40 477.620   4
 -16  -2 -10 5546.97 511.447   4
 -16   2 -12 213.099 193.286   4
 -16  -2 -12 228.288 185.868   4
  16   2 -12 452.964 215.602   6
 -16   2 -14 10678.1 671.699   4
 -16  -2 -14 11055.2 674.814   4
  16   2 -14 10170.6 666.095   6
 -16   2 -16 5943.44 503.663   4
 -16  -2 -16 5245.18 479.706   4
  16   2 -16 5273.32 476.811   6
 -16  -2 -18 17317.2 881.270   5
  16   2 -18 14015.9 752.266   6
 -16  -2 -20 1451.27 308.920   5
 -16  -2 -22 302.567 200.992   5
 -16   2 -22 95.8727 245.616   5
 -16  -2 -24 8238.24 521.844   5
 -16   2 -24 7790.38 522.958   5
  16   4   0 5888.80 536.914   6
 -16   4  -2 16647.4 825.961   4
  16   4   2 15150.7 821.647   6
  16   4  -2 16786.3 870.830   6
 -16   4  -4-280.556 245.889   4
  16   4  -4-7.04134 186.403   6
 -16   4  -6-298.146 234.829   4
 -16  -4  -6 163.124 206.144   4
  16   4  -6 203.775 214.327   6
  16   4  -8 11801.1 729.629   6
 -16   4  -8 11401.5 691.176   4
 -16  -4  -8 12304.7 738.637   4
  16   4 -10 9661.79 661.667   6
 -16   4 -10 8885.89 612.618   4
 -16  -4 -10 9468.01 642.697   4
 -16   4 -12 8.73676 164.782   4
 -16  -4 -12 110.881 179.682   4
  16   4 -12-87.1430 188.589   6
  16   4 -14 2043.77 332.552   6
 -16   4 -14 2220.96 343.741   4
 -16  -4 -14 1697.57 284.498   4
 -16  -4 -16 16430.9 840.142   5
 -16   4 -16 15190.8 787.702   4
  16   4 -16 16000.4 811.069   6
 -16  -4 -18 11476.4 685.451   5
  16   4 -18 10514.6 655.292   6
 -16  -4 -20 5867.11 485.414   5
  16   4 -20 4213.73 407.435   6
 -16  -4 -22 394.286 189.583   5
 -16   4 -22 258.952 199.596   5
  16   6   0 11464.5 713.388   6
 -16   6   0 10635.1 661.218   4
 -16   6  -2 324.048 173.570   4
  16   6   2 669.704 228.548   6
  16   6  -2 681.734 229.662   6
 -16   6  -4 355.653 182.978   4
  16   6   4 373.046 194.027   6
  16   6  -4 333.209 183.197   6
  16   6  -6 2956.45 394.553   6
 -16   6  -6 3187.18 383.099   4
 -16  -6  -6 3675.06 428.198   4
  16   6  -8 21978.8 979.049   6
 -16   6  -8 23961.6 952.007   4
 -16  -6  -8 23483.2 989.642   4
 -16   6 -10 11784.6 678.117   4
  16   6 -10 10876.9 701.512   6
 -16  -6 -10 10015.4 646.263   4
 -16  -6 -12 1715.76 274.522   5
 -16   6 -12 2473.91 337.074   4
  16   6 -12 2265.61 363.265   6
 -16  -6 -14 2140.74 313.459   5
 -16   6 -14 2145.85 314.219   4
  16   6 -14 2092.39 326.157   6
 -16  -6 -16 14125.1 716.385   5
  16   6 -16 13131.6 732.183   6
 -16  -6 -18 13657.8 693.219   5
  16   6 -18 12459.0 700.907   6
 -16  -6 -20 388.017 188.342   5
  16   6 -20 326.653 175.229   6
 -16  -6 -22-411.055 217.333   5
 -16   8   0 424.168 164.818   4
  16   8   0 933.962 249.848   6
 -16   8   2 2027.91 291.421   4
  16   8   2 3087.97 407.019   6
 -16   8  -2 2595.62 336.076   4
  16   8  -2 2582.36 370.968   6
 -16   8  -4 418.956 183.692   4
 -16   8   4 204.536 165.151   4
  16   8   4 551.174 225.497   6
  16   8  -4 678.202 227.406   6
 -16   8  -6 19846.9 866.215   4
  16   8  -6 18273.4 896.996   6
 -16   8  -8 18465.6 825.556   4
  16   8  -8 16944.1 857.475   6
 -16   8 -10 14154.6 720.410   4
  16   8 -10 12842.6 752.272   6
 -16  -8 -12 1393.92 241.203   5
 -16   8 -12 1605.38 274.537   4
  16   8 -12 1746.92 318.668   6
 -16  -8 -14 624.611 187.585   5
  16   8 -14 607.099 207.414   6
 -16  -8 -16 5540.04 429.659   5
  16   8 -16 5526.27 481.972   6
 -16  -8 -18 5823.76 431.763   5
  16   8 -18 6212.27 506.072   6
 -16  -8 -20 741.141 192.081   5
  16   8 -20 843.802 204.557   6
  16  10   0 5128.49 505.292   6
 -16  10   0 5734.17 463.431   4
 -16  10  -2 642.251 203.568   4
 -16  10   2 404.062 143.783   4
  16  10   2 479.439 213.261   6
  16  10  -2 632.517 228.124   6
 -16  10  -4 6538.17 498.106   4
  16  10  -4 6214.92 544.895   6
 -16  10   4 5646.80 451.524   4
 -16  10  -6 16860.5 770.455   4
  16  10  -6 14863.5 811.053   6
 -16  10   6 14700.0 708.981   4
 -16  10  -8 20716.6 872.685   4
  16  10  -8 19540.1 917.363   6
 -16  10   8 18053.4 782.924   4
 -16  10 -10 8115.44 564.000   4
  16  10 -10 7446.32 579.438   6
  16  10 -12 547.747 202.953   6
 -16  10  12 355.365 122.404   4
 -16 -10 -14-185.852 166.231   5
  16  10 -14 167.393 178.195   6
 -16 -10 -16 926.092 193.738   5
  16  10 -16 1350.98 276.653   6
  16  10 -18 1316.63 244.592   6
 -16  12   0 6727.19 484.311   4
  16  12   0 6634.44 562.574   6
 -16  12  -2-0.21554 132.268   4
 -16  12   2 161.857 140.519   4
  16  12  -2 75.5242 168.395   6
 -16  12  -4 4860.77 415.207   4
 -16  12   4 4276.06 385.095   4
  16  12  -4 4466.14 476.198   6
 -16  12  -6 13333.1 679.937   4
  16  12  -6 12344.2 747.425   6
 -16  12   6 11114.1 598.240   4
 -16  12  -8 15743.7 726.872   4
  16  12  -8 14131.4 767.777   6
  16  12 -10 7898.01 577.972   6
  16  12 -12 830.003 216.006   6
  16  12 -14 76.8965 155.409   6
  16  12 -16 916.992 229.017   6
 -16  14   0 4018.97 365.783   4
  16  14   0 3618.06 416.284   6
 -16  14   2 1516.76 241.137   4
 -16  14  -2 1443.75 249.322   4
  16  14  -2 1813.78 318.191   6
  16  14  -4-63.9965 181.566   6
 -16  14  -4 289.811 154.499   4
 -16  14   4 232.629 137.699   4
  16  14  -6 5240.89 482.500   6
  16  14  -8 11909.0 712.300   6
  16  14 -10 7874.99 564.533   6
  16  14 -12 215.686 156.583   6
  16  14 -14 873.376 218.021   6
 -17   1  -1 25759.7 976.661   4
 -17   1  -3 22185.4 910.380   4
 -17  -1  -3 23985.5 958.449   4
 -17   1  -5 11957.7 676.301   4
 -17  -1  -5 12189.7 688.878   4
 -17   1  -7 1007.41 262.587   4
 -17  -1  -7 1095.14 253.885   4
 -17   1  -9 1172.84 259.906   4
 -17  -1  -9 1162.76 252.108   4
 -17   1 -11 15.9929 160.673   4
 -17  -1 -11-110.754 181.618   4
 -17   1 -13 6883.30 505.351   4
 -17  -1 -13 6892.31 499.788   4
 -17  -1 -15 19476.3 818.844   4
 -17   1 -15 23043.5 889.190   4
 -17  -1 -17 43495.1 1275.68   5
 -17  -1 -19 29382.1 1005.99   5
 -17   1 -19 29665.5 1027.06   5
 -17   3   1 16424.8 770.195   4
 -17   3  -1 16030.6 754.250   4
 -17   3  -3 5359.31 462.184   4
 -17  -3  -3 6000.17 527.517   4
 -17   3  -5 827.619 225.059   4
 -17  -3  -5 1029.78 269.311   4
 -17   3  -7 735.145 222.968   4
 -17  -3  -7 1161.08 282.552   4
  17   3  -7 876.518 246.251   6
  17   3  -9 10438.3 661.412   6
 -17   3  -9 11388.6 643.177   4
 -17  -3  -9 10368.4 639.348   4
 -17  -3 -11 47.9544 161.000   4
  17   3 -11 200.868 189.120   6
 -17   3 -11 8.94149 164.427   4
 -17   3 -13 308.435 173.337   4
 -17  -3 -13 352.056 178.644   4
 -17  -3 -15 14973.3 755.160   5
 -17  -3 -17 25615.0 940.939   5
 -17   5  -1 719.943 212.690   4
 -17   5   1 892.993 225.754   4
 -17   5  -3 424.275 161.072   4
 -17  -5  -3 163.498 179.567   4
 -17   5   3-2.22358 162.228   4
  17   5  -3 315.850 186.476   6
 -17   5  -5 832.575 232.571   4
 -17  -5  -5 922.937 265.287   4
  17   5  -5 829.707 234.905   6
  17   5  -7 23710.5 958.678   6
 -17   5  -7 26476.9 932.588   4
 -17  -5  -7 24330.1 959.490   4
 -17  -5  -9 7923.51 532.260   5
 -17   5  -9 8691.48 552.094   4
  17   5  -9 9093.09 600.386   6
 -17  -5  -9 7552.21 531.269   4
 -17  -5 -11 16621.5 751.029   5
 -17   5 -11 18528.7 795.341   4
  17   5 -11 18364.9 829.485   6
 -17  -5 -13 47.1142 175.815   5
 -17   5 -13 4.44649 170.671   4
  17   5 -13 235.762 179.685   6
 -17  -5 -15 2846.81 331.063   5
  17   5 -15 2929.12 356.408   6
 -17  -5 -17 5842.07 441.128   5
  17   5 -17 5905.20 476.047   6
 -17   7  -1 101.418 145.717   4
 -17   7   1-69.1141 168.504   4
  17   7  -1 149.411 161.433   6
 -17   7  -3 1470.53 258.332   4
 -17   7   3 938.033 201.434   4
 -17  -7  -3 947.499 247.310   4
  17   7  -3 1292.64 271.501   6
  17   7  -5 21908.7 935.740   6
 -17   7  -5 23894.1 877.286   4
 -17  -7  -5 21000.8 872.917   4
 -17   7   5 21778.3 825.174   4
 -17   7  -7 31357.5 995.732   4
  17   7  -7 31316.8 1082.62   6
 -17   7  -9 37180.0 1091.78   4
  17   7  -9 37467.1 1186.75   6
 -17   7 -11 9826.40 567.791   4
  17   7 -11 9113.31 594.764   6
 -17  -7 -13 4488.94 363.285   5
  17   7 -13 5125.78 452.116   6
  17   7 -15 349.529 179.420   6
 -17   9  -1-144.932 146.551   4
 -17   9   1-200.032 157.520   4
  17   9   1-109.686 157.753   6
  17   9  -1 267.813 194.735   6
  17   9  -3 11623.1 678.590   6
 -17   9  -3 11787.8 613.586   4
 -17   9   3 10985.2 586.282   4
 -17   9  -5 23150.8 848.292   4
  17   9  -5 22277.9 911.833   6
 -17   9   5 21488.0 797.453   4
  17   9  -7 36281.7 1164.88   6
 -17   9   7 33479.3 980.752   4
 -17   9  -9 27484.2 915.270   4
  17   9  -9 24894.4 952.198   6
  17   9 -11 13367.1 696.076   6
 -17   9  11 8524.35 484.265   4
  17   9 -13 1920.25 290.870   6
 -17  11  -1 47.4027 130.141   4
 -17  11   1 128.932 120.494   4
  17  11  -1 338.849 184.453   6
 -17  11  -3 2008.59 266.014   4
  17  11  -3 2194.06 322.692   6
 -17  11   3 1834.17 254.732   4
 -17  11  -5 15554.7 667.732   4
  17  11  -5 15264.3 753.192   6
 -17  11  -7 15440.8 672.232   4
  17  11  -7 14089.8 722.829   6
  17  11  -9 17533.0 790.743   6
  17  11 -11 4829.17 422.810   6
 -18   0   0 14841.0 677.966   4
 -18   0  -2 38617.9 1087.23   4
 -18   0   2 34713.0 1024.54   4
 -18   0  -4 16585.2 718.951   4
 -18   0  -6 11521.5 605.195   4
 -18   0  -8 2992.88 329.190   4
 -18   2   0 26540.1 877.199   4
 -18  -2   0 26551.4 911.359   4
 -18  -2   2 10319.6 589.287   4
 -18   2  -2 9798.71 551.181   4
 -18  -2  -2 10791.0 604.668   4
 -18   2   2 9545.16 537.838   4
 -18   2  -4 14657.0 666.548   4
 -18  -2  -4 14727.9 697.174   4
 -18   2   4 12753.1 611.734   4
 -18   2  -6 3259.38 343.145   4
 -18  -2  -6 3015.26 337.408   4
 -18   2  -8 15.0278 130.062   4
 -18  -2  -8-10.2136 127.420   4
 -18   2 -10-157.858 162.799   4
 -18   4   0 2837.04 295.468   4
 -18  -4   0 3057.15 342.909   4
 -18  -4   2 4105.33 389.535   4
 -18   4  -2 3737.27 342.852   4
 -18   4   2 3513.51 319.735   4
 -18  -4  -2 4112.20 386.175   4
 -18   4  -4 193.942 144.477   4
 -18   4   4-36.4035 128.156   4
 -18   4  -6 2680.58 310.827   4
 -18   4   6 2075.57 257.783   4
 -18   4  -8 5833.33 422.962   4
 -18   4   8 4345.98 355.423   4
 -18   4  10 3305.28 309.310   4
 -18   4 -10 5098.70 397.091   4
 -18   6   0-195.144 159.057   4
 -18  -6   0-90.3418 162.805   4
 -18   6  -2-124.572 137.350   4
 -18   6   2-75.5237 156.765   4
 -18  -6   2 126.950 156.024   4
 -18   6  -4 8413.90 482.629   4
 -18   6   4 8251.39 472.448   4
 -18   6  -6 20172.5 741.619   4
 -18   6   6 18263.5 686.172   4
 -18   6  -8 23829.7 797.763   4
 -18   8   0-106.511 133.848   4
 -18   8  -2 2694.93 278.314   4
 -18   8   2 2442.49 261.108   4
 -18   8  -4 18868.6 693.619   4
   0   0   0    0.00    0.00   0

TITL exp_2043 in Fmmm
REM Fmmm (#69 in standard setting)
CELL 1.54184  16.068829  28.800440  41.030632  90.0000  90.0000  90.0000
ZERR   82.00   0.000654   0.001530   0.001721   0.0000   0.0000   0.0000
LATT  4
SYMM -x,-y, z
SYMM -x, y,-z
SYMM  x,-y,-z
SFAC C H N O
UNIT 902.00 820.00 82.00 82.00
TREF
HKLF 4
END
;
_shelx_hkl_checksum               86435
_shelx_fab_file
;
    0    0    4    278.15      0.00
    0    0    6   -282.49      0.00
    0    0    8    -75.76      0.00
    0    0   10    -26.94      0.00
    0    0   12    -43.67      0.00
    0    0   14      0.38      0.00
    0    0   16     56.45      0.00
    0    0   18     63.86      0.00
    0    0   20    -19.66      0.00
    0    0   24     19.34      0.00
    0    0   26      1.22      0.00
    0    0   28      6.79      0.00
    0    0   30     21.87      0.00
    0    0   32    -27.96      0.00
    0    0   34    -25.55      0.00
    0    0   36    -25.19      0.00
    0    0   38     14.06      0.00
    0    0   40     14.11      0.00
    0    0   42     -1.76      0.00
    0    0   44     -2.50      0.00
    0    2    2   -893.14      0.00
    0    2    8    -27.15      0.00
    0    2   10     23.90      0.00
    0    2   12     43.42      0.00
    0    2   14     14.58      0.00
    0    2   16     -8.48      0.00
    0    2   18     -9.80      0.00
    0    2   20    -31.01      0.00
    0    2   22      3.12      0.00
    0    2   24     13.50      0.00
    0    2   26      3.73      0.00
    0    2   28     -4.92      0.00
    0    2   30      7.16      0.00
    0    2   32    -10.91      0.00
    0    2   34      3.58      0.00
    0    2   36      3.91      0.00
    0    2   38     -2.31      0.00
    0    2   40     -2.77      0.00
    0    2   42      3.75      0.00
    0    2   44     -6.24      0.00
    0    4    0    535.20      0.00
    0    4    2      3.72      0.00
    0    4    4     92.11      0.00
    0    4    6    -70.53      0.00
    0    4    8   -136.28      0.00
    0    4   10    -37.99      0.00
    0    4   12     16.25      0.00
    0    4   14     28.54      0.00
    0    4   16     14.46      0.00
    0    4   18     -4.44      0.00
    0    4   20      5.28      0.00
    0    4   22     12.47      0.00
    0    4   24     10.03      0.00
    0    4   26      4.75      0.00
    0    4   28      4.30      0.00
    0    4   30      6.15      0.00
    0    4   32     -5.71      0.00
    0    4   34    -17.91      0.00
    0    4   36     -0.16      0.00
    0    4   38     -7.34      0.00
    0    4   40      3.82      0.00
    0    4   42      8.16      0.00
    0    4   44     -2.71      0.00
    0    4   46     -2.44      0.00
    0    6    0     89.68      0.00
    0    6    2     43.24      0.00
    0    6    4   -158.63      0.00
    0    6    6     96.48      0.00
    0    6    8   -133.57      0.00
    0    6   10     -4.50      0.00
    0    6   12     13.23      0.00
    0    6   14     60.66      0.00
    0    6   16     26.30      0.00
    0    6   18    -13.59      0.00
    0    6   20    -36.70      0.00
    0    6   22    -50.40      0.00
    0    6   24      4.21      0.00
    0    6   26      0.81      0.00
    0    6   28      2.78      0.00
    0    6   30     14.18      0.00
    0    6   32      2.65      0.00
    0    6   34    -21.71      0.00
    0    6   36     -0.03      0.00
    0    6   38     -0.31      0.00
    0    6   40      8.32      0.00
    0    6   42     -5.54      0.00
    0    6   44     -0.67      0.00
    0    6   46      3.70      0.00
    0    8    0    -65.15      0.00
    0    8    2     34.97      0.00
    0    8    4   -208.00      0.00
    0    8    6     -7.72      0.00
    0    8    8   -175.29      0.00
    0    8   10     39.82      0.00
    0    8   12      2.68      0.00
    0    8   14     49.65      0.00
    0    8   16     13.35      0.00
    0    8   18     16.08      0.00
    0    8   20    -11.69      0.00
    0    8   22    -36.13      0.00
    0    8   24     10.20      0.00
    0    8   26     10.09      0.00
    0    8   28      7.00      0.00
    0    8   30      2.74      0.00
    0    8   32     -1.41      0.00
    0    8   34      7.70      0.00
    0    8   36      9.58      0.00
    0    8   38     -6.63      0.00
    0    8   40      0.18      0.00
    0    8   42     -4.42      0.00
    0    8   44     -0.09      0.00
    0    8   46     -1.80      0.00
    0   10    0     50.05      0.00
    0   10    2    101.94      0.00
    0   10    4     -3.50      0.00
    0   10    6     97.35      0.00
    0   10    8      5.75      0.00
    0   10   10     80.97      0.00
    0   10   12      3.81      0.00
    0   10   14    -11.04      0.00
    0   10   16    -34.86      0.00
    0   10   18      3.29      0.00
    0   10   20    -11.44      0.00
    0   10   22      4.39      0.00
    0   10   24     12.44      0.00
    0   10   26      5.77      0.00
    0   10   28      9.90      0.00
    0   10   30      1.92      0.00
    0   10   32     -8.86      0.00
    0   10   34    -10.00      0.00
    0   10   36     -9.18      0.00
    0   10   38     -1.88      0.00
    0   10   40      4.96      0.00
    0   10   42      7.45      0.00
    0   10   44     -1.13      0.00
    0   12    0     65.34      0.00
    0   12    2     -2.06      0.00
    0   12    4    -79.64      0.00
    0   12    6    -55.03      0.00
    0   12    8    -64.82      0.00
    0   12   10    -46.75      0.00
    0   12   12      6.92      0.00
    0   12   14     49.88      0.00
    0   12   16     33.77      0.00
    0   12   18      9.20      0.00
    0   12   20    -28.10      0.00
    0   12   22    -14.97      0.00
    0   12   24    -11.03      0.00
    0   12   26     -3.85      0.00
    0   12   28      6.59      0.00
    0   12   30     15.43      0.00
    0   12   32      1.30      0.00
    0   12   34     -7.87      0.00
    0   12   36      0.41      0.00
    0   12   38      6.63      0.00
    0   12   40      4.83      0.00
    0   12   42     -5.42      0.00
    0   14    0     73.79      0.00
    0   14    2     18.91      0.00
    0   14    4     21.82      0.00
    0   14    6      2.32      0.00
    0   14    8      6.19      0.00
    0   14   10     13.85      0.00
    0   14   12     26.15      0.00
    0   14   14    -11.20      0.00
    0   14   16     -0.17      0.00
    0   14   18     -1.08      0.00
    0   14   20     -5.81      0.00
    0   14   22     -3.90      0.00
    0   14   24      9.88      0.00
    0   14   26     11.88      0.00
    0   14   28      0.26      0.00
    0   14   30      2.04      0.00
    0   14   32     -0.71      0.00
    0   14   34      5.98      0.00
    0   14   36      6.42      0.00
    0   14   38     -1.99      0.00
    0   14   40     -8.20      0.00
    0   14   42     -0.81      0.00
    0   16    0     30.88      0.00
    0   16    2    -11.50      0.00
    0   16    4    -10.32      0.00
    0   16    6    -45.12      0.00
    0   16    8    -19.08      0.00
    0   16   10     -5.64      0.00
    0   16   12     -5.06      0.00
    0   16   14     -9.68      0.00
    0   16   16     16.40      0.00
    0   16   18     -3.66      0.00
    0   16   20      6.05      0.00
    0   16   22     -9.01      0.00
    0   16   24     -3.58      0.00
    0   16   26      1.20      0.00
    0   16   28      6.14      0.00
    0   16   30      2.83      0.00
    0   16   32     -9.00      0.00
    0   16   34     -8.03      0.00
    0   16   36     -2.25      0.00
    0   16   38      1.58      0.00
    0   16   40      8.29      0.00
    0   18    0      0.19      0.00
    0   18    2    -14.83      0.00
    0   18    4      9.68      0.00
    0   18    6     12.35      0.00
    0   18    8     10.69      0.00
    0   18   10     -3.61      0.00
    0   18   12      6.04      0.00
    0   18   14     13.73      0.00
    0   18   16     17.01      0.00
    0   18   18    -12.46      0.00
    0   18   20     -5.04      0.00
    0   18   22     -3.70      0.00
    0   18   24     12.48      0.00
    0   18   26     -0.69      0.00
    0   18   28     -7.85      0.00
    0   18   30      1.09      0.00
    0   18   32      8.10      0.00
    0   18   34      2.33      0.00
    0   18   36     -0.19      0.00
    0   18   38     -4.76      0.00
    0   20    0     34.28      0.00
    0   20    2     23.24      0.00
    0   20    4     13.43      0.00
    0   20    6     -9.24      0.00
    0   20    8    -24.31      0.00
    0   20   10      4.59      0.00
    0   20   12     11.32      0.00
    0   20   14     -2.35      0.00
    0   20   16      0.88      0.00
    0   20   18     -0.24      0.00
    0   20   20      7.17      0.00
    0   20   22     -0.07      0.00
    0   20   24     -7.98      0.00
    0   20   26     -7.68      0.00
    0   20   28      3.85      0.00
    0   20   30      4.68      0.00
    0   20   32     -1.12      0.00
    0   20   34     -9.10      0.00
    0   20   36     -0.70      0.00
    0   22    0     -8.61      0.00
    0   22    2    -10.02      0.00
    0   22    4    -16.23      0.00
    0   22    6    -19.39      0.00
    0   22    8    -13.53      0.00
    0   22   10      6.51      0.00
    0   22   12      3.24      0.00
    0   22   14     -0.37      0.00
    0   22   16     -6.24      0.00
    0   22   18     -1.43      0.00
    0   22   20     -7.47      0.00
    0   22   22     -1.78      0.00
    0   22   24      0.14      0.00
    0   22   26      1.77      0.00
    0   22   28     -0.36      0.00
    0   22   30     -3.95      0.00
    0   22   32     -8.45      0.00
    0   22   34    -10.20      0.00
    0   24    4     14.47      0.00
    0   24    6     25.60      0.00
    0   24    8     17.91      0.00
    0   24   10      4.33      0.00
    0   24   12      0.68      0.00
    0   24   14      2.81      0.00
    0   24   16      3.66      0.00
    0   24   18     -5.66      0.00
    0   24   20    -14.66      0.00
    0   24   22      4.77      0.00
    0   24   24     -7.09      0.00
    0   24   26     10.67      0.00
    0   24   28     19.29      0.00
    0   24   30     22.07      0.00
    0   26    0     17.30      0.00
    0   26    2      2.25      0.00
    0   26    4     -7.56      0.00
    0   26    6    -13.38      0.00
    0   26    8    -12.57      0.00
    0   26   10    -10.75      0.00
    0   26   12     -3.62      0.00
    0   26   14     -1.14      0.00
    0   26   16     10.19      0.00
    0   26   18     11.38      0.00
    0   26   20      9.12      0.00
    0   26   22     -0.94      0.00
    0   26   24     -3.73      0.00
    0   26   26     13.58      0.00
    0   28    0      6.45      0.00
    0   28    2      1.01      0.00
    0   28    4      5.54      0.00
    0   28    6      5.74      0.00
    0   28    8     -1.60      0.00
    0   28   10      8.57      0.00
    0   28   12     14.61      0.00
    0   28   14      4.77      0.00
    0   28   16      4.94      0.00
    0   28   18    -10.95      0.00
    0   28   20    -11.83      0.00
    0   28   22      7.41      0.00
    0   28   24     17.80      0.00
    0   30    0      3.04      0.00
    0   30    2     -2.76      0.00
    0   30    4     -2.41      0.00
    0   30    6      5.43      0.00
    0   30    8     -1.52      0.00
    0   30   10      3.06      0.00
    0   30   12     -4.31      0.00
    0   30   14     -7.16      0.00
    0   30   16     -4.78      0.00
    0   30   18     -3.20      0.00
    0   30   20      1.27      0.00
    0   32    0    -14.44      0.00
    0   32    2     -8.04      0.00
    0   32    4     -1.50      0.00
    0   32    6     -8.19      0.00
    0   32    8    -13.27      0.00
    0   32   10     -3.32      0.00
    0   32   12     -2.43      0.00
    1    1    1    413.41      0.00
    1    1    3    159.76      0.00
    1    1    5   -158.17      0.00
    1    1    7     63.89      0.00
    1    1    9     -5.34      0.00
    1    1   11      4.43      0.00
    1    1   13    -41.33      0.00
    1    1   15     -3.43      0.00
    1    1   17    -15.53      0.00
    1    1   19     17.16      0.00
    1    1   21     13.84      0.00
    1    1   23     19.75      0.00
    1    1   25    -12.03      0.00
    1    1   27     13.32      0.00
    1    1   29    -16.57      0.00
    1    1   31      3.57      0.00
    1    1   33      3.30      0.00
    1    1   35     -3.69      0.00
    1    1   37     -1.28      0.00
    1    1   39     -0.78      0.00
    1    1   41      3.60      0.00
    1    1   43      7.87      0.00
    1    1   45     10.92      0.00
    1    3    1    240.58      0.00
    1    3    3   -182.08      0.00
    1    3    5   -136.26      0.00
    1    3    7    -25.35      0.00
    1    3    9      2.64      0.00
    1    3   11    -25.41      0.00
    1    3   13     36.03      0.00
    1    3   15     72.89      0.00
    1    3   17      7.11      0.00
    1    3   19      0.74      0.00
    1    3   21    -13.79      0.00
    1    3   23     11.38      0.00
    1    3   25     -1.45      0.00
    1    3   27      4.53      0.00
    1    3   29     -1.20      0.00
    1    3   31      4.26      0.00
    1    3   33     -6.02      0.00
    1    3   35    -21.60      0.00
    1    3   37     -6.23      0.00
    1    3   39     16.13      0.00
    1    3   41     -6.13      0.00
    1    3   43    -13.30      0.00
    1    3   45     14.73      0.00
    1    3   47     12.97      0.00
    1    5    1   -159.10      0.00
    1    5    3     45.26      0.00
    1    5    5    156.01      0.00
    1    5    7   -134.48      0.00
    1    5    9    -34.32      0.00
    1    5   11    -47.04      0.00
    1    5   13     57.55      0.00
    1    5   15     18.46      0.00
    1    5   17    -20.99      0.00
    1    5   19    -10.72      0.00
    1    5   21     -6.05      0.00
    1    5   23      0.70      0.00
    1    5   25      3.77      0.00
    1    5   27      1.45      0.00
    1    5   29     -5.91      0.00
    1    5   31     -6.02      0.00
    1    5   33     14.88      0.00
    1    5   35     11.57      0.00
    1    5   37     -5.87      0.00
    1    5   39      2.21      0.00
    1    5   41     -1.18      0.00
    1    5   43     -3.19      0.00
    1    5   45     -4.75      0.00
    1    5   47     -4.38      0.00
    1    7    1    -13.01      0.00
    1    7    3     15.92      0.00
    1    7    5    -42.75      0.00
    1    7    7    -19.59      0.00
    1    7    9    103.31      0.00
    1    7   11    -10.54      0.00
    1    7   13     -7.59      0.00
    1    7   15    -51.01      0.00
    1    7   17     10.05      0.00
    1    7   19      9.13      0.00
    1    7   21     17.43      0.00
    1    7   23     -9.07      0.00
    1    7   25     -4.30      0.00
    1    7   27      8.00      0.00
    1    7   29     -0.88      0.00
    1    7   31     -9.17      0.00
    1    7   33      0.77      0.00
    1    7   35     -6.96      0.00
    1    7   37     -6.55      0.00
    1    7   39     -0.69      0.00
    1    7   41      1.68      0.00
    1    7   43      9.10      0.00
    1    7   45     -0.69      0.00
    1    9    1     37.50      0.00
    1    9    3     26.39      0.00
    1    9    5    -83.37      0.00
    1    9    7    -30.86      0.00
    1    9    9    -63.98      0.00
    1    9   11    -49.63      0.00
    1    9   13     31.10      0.00
    1    9   15     42.39      0.00
    1    9   17     20.10      0.00
    1    9   19    -31.69      0.00
    1    9   21     -6.96      0.00
    1    9   23    -17.69      0.00
    1    9   25      0.46      0.00
    1    9   27     -1.31      0.00
    1    9   29      5.17      0.00
    1    9   31     12.41      0.00
    1    9   33      4.15      0.00
    1    9   35     -9.58      0.00
    1    9   37      1.76      0.00
    1    9   39      0.99      0.00
    1    9   41      0.56      0.00
    1    9   43     -1.96      0.00
    1    9   45    -11.32      0.00
    1   11    1    -22.70      0.00
    1   11    3     14.28      0.00
    1   11    5    -24.89      0.00
    1   11    7     35.82      0.00
    1   11    9     25.39      0.00
    1   11   11     32.64      0.00
    1   11   13      2.68      0.00
    1   11   15     14.98      0.00
    1   11   17    -11.18      0.00
    1   11   19     -0.79      0.00
    1   11   21      8.54      0.00
    1   11   23     -8.57      0.00
    1   11   25     18.15      0.00
    1   11   27      8.03      0.00
    1   11   29     -3.24      0.00
    1   11   31     -7.55      0.00
    1   11   33      3.03      0.00
    1   11   35      8.41      0.00
    1   11   37      5.27      0.00
    1   11   39     -7.64      0.00
    1   11   41     -5.16      0.00
    1   11   43     -0.77      0.00
    1   13    1     33.43      0.00
    1   13    3     24.39      0.00
    1   13    5     -4.35      0.00
    1   13    7    -14.89      0.00
    1   13    9      3.66      0.00
    1   13   11     15.46      0.00
    1   13   13    -27.19      0.00
    1   13   15    -10.04      0.00
    1   13   17    -18.76      0.00
    1   13   19     21.58      0.00
    1   13   21     10.62      0.00
    1   13   23     -1.00      0.00
    1   13   25     -2.51      0.00
    1   13   27      0.18      0.00
    1   13   29      1.21      0.00
    1   13   31     -4.18      0.00
    1   13   33     -6.52      0.00
    1   13   35     -5.91      0.00
    1   13   37     -4.44      0.00
    1   13   39     -0.73      0.00
    1   13   41      8.08      0.00
    1   13   43      4.19      0.00
    1   15    1     -8.65      0.00
    1   15    3    -33.15      0.00
    1   15    5      5.00      0.00
    1   15    7      9.01      0.00
    1   15    9    -13.52      0.00
    1   15   11    -28.76      0.00
    1   15   13     -7.34      0.00
    1   15   15     31.09      0.00
    1   15   17      3.30      0.00
    1   15   19      1.52      0.00
    1   15   21    -20.24      0.00
    1   15   23     -2.68      0.00
    1   15   25     -0.33      0.00
    1   15   27     -1.37      0.00
    1   15   29     -2.40      0.00
    1   15   31     12.75      0.00
    1   15   33      6.07      0.00
    1   15   35      4.11      0.00
    1   15   37      1.39      0.00
    1   15   39      2.55      0.00
    1   15   41     -0.43      0.00
    1   17    1     19.18      0.00
    1   17    3     12.93      0.00
    1   17    5     12.40      0.00
    1   17    7    -17.72      0.00
    1   17    9      3.35      0.00
    1   17   11     22.63      0.00
    1   17   13      5.40      0.00
    1   17   15      2.41      0.00
    1   17   17      0.32      0.00
    1   17   19      5.48      0.00
    1   17   21      4.67      0.00
    1   17   23      4.82      0.00
    1   17   25     -2.34      0.00
    1   17   27     -1.31      0.00
    1   17   29     -0.98      0.00
    1   17   31      3.59      0.00
    1   17   33     -0.58      0.00
    1   17   35      0.97      0.00
    1   17   37     -2.31      0.00
    1   17   39      1.72      0.00
    1   19    1    -12.72      0.00
    1   19    3     -5.79      0.00
    1   19    5     -9.28      0.00
    1   19    7    -11.84      0.00
    1   19    9      4.53      0.00
    1   19   11     -5.46      0.00
    1   19   13     -4.47      0.00
    1   19   15     -9.75      0.00
    1   19   17     -1.04      0.00
    1   19   19     -0.55      0.00
    1   19   21     -2.37      0.00
    1   19   23     -6.02      0.00
    1   19   25      2.68      0.00
    1   19   27      2.24      0.00
    1   19   29      3.17      0.00
    1   19   31    -11.15      0.00
    1   19   33    -12.38      0.00
    1   19   35     -2.60      0.00
    1   19   37      1.38      0.00
    1   19   39     -8.77      0.00
    1   21    1     -2.79      0.00
    1   21    3      6.70      0.00
    1   21    5     15.75      0.00
    1   21    7     22.13      0.00
    1   21    9      4.69      0.00
    1   21   11     -5.23      0.00
    1   21   13     14.46      0.00
    1   21   15     -8.15      0.00
    1   21   17      0.06      0.00
    1   21   19     -6.49      0.00
    1   21   21     -3.75      0.00
    1   21   23      6.22      0.00
    1   21   25      4.30      0.00
    1   21   27    -11.52      0.00
    1   21   29      0.14      0.00
    1   21   31      5.50      0.00
    1   21   33     13.70      0.00
    1   21   35      1.85      0.00
    1   23    3      0.19      0.00
    1   23    5    -12.37      0.00
    1   23    7     -7.59      0.00
    1   23    9     -9.83      0.00
    1   23   11     -9.68      0.00
    1   23   13      1.35      0.00
    1   23   15     -4.59      0.00
    1   23   17      8.25      0.00
    1   23   19     15.40      0.00
    1   23   21     -0.32      0.00
    1   23   23    -11.90      0.00
    1   23   25     -0.52      0.00
    1   23   27      1.41      0.00
    1   23   29      4.86      0.00
    1   23   31     -2.63      0.00
    1   23   33      7.62      0.00
    1   25    1     -9.47      0.00
    1   25    3      4.20      0.00
    1   25    5     -0.63      0.00
    1   25    7      0.26      0.00
    1   25    9      6.15      0.00
    1   25   11     11.58      0.00
    1   25   13     10.80      0.00
    1   25   15      4.79      0.00
    1   25   17     -5.51      0.00
    1   25   19     -9.03      0.00
    1   25   21     -9.02      0.00
    1   25   23      9.97      0.00
    1   25   25      7.01      0.00
    1   25   27     -3.38      0.00
    1   27    1      1.59      0.00
    1   27    3      0.59      0.00
    1   27    5      4.40      0.00
    1   27    7     10.60      0.00
    1   27    9      5.91      0.00
    1   27   11     -1.73      0.00
    1   27   13     -8.01      0.00
    1   27   15     -0.69      0.00
    1   27   17     -0.80      0.00
    1   27   19     -3.43      0.00
    1   27   21      2.30      0.00
    1   27   23     -2.29      0.00
    1   27   25    -12.06      0.00
    1   29    1     -1.83      0.00
    1   29    3      1.66      0.00
    1   29    5     -3.25      0.00
    1   29    7     -5.50      0.00
    1   29    9     -4.56      0.00
    1   29   11     -5.99      0.00
    1   29   13     -5.03      0.00
    1   29   15      3.80      0.00
    1   29   17      7.68      0.00
    1   29   19      4.82      0.00
    1   29   21     -0.08      0.00
    1   31    1      2.09      0.00
    1   31    3      5.42      0.00
    1   31    5      2.01      0.00
    1   31    7     -2.17      0.00
    1   31    9     -2.79      0.00
    1   31   11      9.58      0.00
    1   31   13     10.37      0.00
    1   31   15      7.85      0.00
    1   31   17      1.14      0.00
    2    0    0    581.42      0.00
    2    0    2   -108.76      0.00
    2    0    4   -329.54      0.00
    2    0    6    -29.81      0.00
    2    0    8     75.16      0.00
    2    0   10    131.48      0.00
    2    0   12    -11.63      0.00
    2    0   14      7.10      0.00
    2    0   16     15.89      0.00
    2    0   18     31.49      0.00
    2    0   20     -4.16      0.00
    2    0   22    -10.15      0.00
    2    0   24     16.80      0.00
    2    0   26    -16.06      0.00
    2    0   28      5.05      0.00
    2    0   30     15.69      0.00
    2    0   32     -4.84      0.00
    2    0   34      3.02      0.00
    2    0   36     -6.94      0.00
    2    0   38      1.87      0.00
    2    0   40      5.69      0.00
    2    0   42      1.19      0.00
    2    0   44      5.20      0.00
    2    0   46      1.07      0.00
    2    2    0    -96.18      0.00
    2    2    2    -40.46      0.00
    2    2    4    118.86      0.00
    2    2    6     73.19      0.00
    2    2    8    -75.42      0.00
    2    2   10    -35.42      0.00
    2    2   12    -46.80      0.00
    2    2   14    -32.45      0.00
    2    2   16    -35.14      0.00
    2    2   18      1.30      0.00
    2    2   20     13.49      0.00
    2    2   22     24.02      0.00
    2    2   24     15.52      0.00
    2    2   26    -21.55      0.00
    2    2   28    -15.90      0.00
    2    2   30     -5.33      0.00
    2    2   32      2.70      0.00
    2    2   34     18.19      0.00
    2    2   36      9.67      0.00
    2    2   38     -6.31      0.00
    2    2   40     -8.73      0.00
    2    2   42      5.84      0.00
    2    2   44      4.97      0.00
    2    2   46     -7.20      0.00
    2    4    0   -466.19      0.00
    2    4    2    -25.21      0.00
    2    4    4     71.80      0.00
    2    4    6    150.62      0.00
    2    4    8    150.61      0.00
    2    4   10     74.40      0.00
    2    4   12     51.96      0.00
    2    4   14      9.31      0.00
    2    4   16     -0.59      0.00
    2    4   18     10.93      0.00
    2    4   20     18.89      0.00
    2    4   22     28.25      0.00
    2    4   24      0.15      0.00
    2    4   26     -9.80      0.00
    2    4   28     -4.35      0.00
    2    4   30     -5.04      0.00
    2    4   32      4.78      0.00
    2    4   34      0.78      0.00
    2    4   36      2.64      0.00
    2    4   38     -6.28      0.00
    2    4   40     -5.61      0.00
    2    4   42     15.72      0.00
    2    4   44      6.92      0.00
    2    4   46     -3.99      0.00
    2    6    0    -23.24      0.00
    2    6    2    189.22      0.00
    2    6    4    -86.73      0.00
    2    6    6    -62.52      0.00
    2    6    8    -93.40      0.00
    2    6   10   -112.01      0.00
    2    6   12    -24.84      0.00
    2    6   14    -13.22      0.00
    2    6   16      1.26      0.00
    2    6   18     11.11      0.00
    2    6   20      4.72      0.00
    2    6   22      5.49      0.00
    2    6   24      5.34      0.00
    2    6   26    -11.52      0.00
    2    6   28     -7.73      0.00
    2    6   30      6.36      0.00
    2    6   32      6.31      0.00
    2    6   34     -8.44      0.00
    2    6   36     -1.09      0.00
    2    6   38      4.71      0.00
    2    6   40     -4.46      0.00
    2    6   42     -4.62      0.00
    2    6   44     -2.15      0.00
    2    6   46      0.79      0.00
    2    8    0   -210.65      0.00
    2    8    2     -1.24      0.00
    2    8    4     20.45      0.00
    2    8    6     98.77      0.00
    2    8    8     73.71      0.00
    2    8   10     35.55      0.00
    2    8   12      9.73      0.00
    2    8   14    -23.62      0.00
    2    8   16    -22.72      0.00
    2    8   18     -3.93      0.00
    2    8   20     -4.03      0.00
    2    8   22      0.33      0.00
    2    8   24     12.08      0.00
    2    8   26     -6.13      0.00
    2    8   28     -5.34      0.00
    2    8   30    -11.75      0.00
    2    8   32     -6.46      0.00
    2    8   34     15.05      0.00
    2    8   36      9.06      0.00
    2    8   38     -2.55      0.00
    2    8   40     -7.12      0.00
    2    8   42     -5.85      0.00
    2    8   44      5.48      0.00
    2   10    0    -35.05      0.00
    2   10    2      0.34      0.00
    2   10    4     -1.63      0.00
    2   10    6    -11.25      0.00
    2   10    8     14.55      0.00
    2   10   10     -6.69      0.00
    2   10   12     -8.50      0.00
    2   10   14    -50.90      0.00
    2   10   16    -19.12      0.00
    2   10   18     31.83      0.00
    2   10   20     29.57      0.00
    2   10   22     34.19      0.00
    2   10   24      4.69      0.00
    2   10   26    -18.51      0.00
    2   10   28     -1.12      0.00
    2   10   30     -3.89      0.00
    2   10   32     -3.19      0.00
    2   10   34      3.23      0.00
    2   10   36     -5.75      0.00
    2   10   38     -2.09      0.00
    2   10   40      3.53      0.00
    2   10   42      1.27      0.00
    2   10   44      8.41      0.00
    2   12    0     -8.95      0.00
    2   12    2    -30.69      0.00
    2   12    4      6.09      0.00
    2   12    6     22.24      0.00
    2   12    8     31.00      0.00
    2   12   10    -55.01      0.00
    2   12   12      2.96      0.00
    2   12   14     -3.25      0.00
    2   12   16      4.66      0.00
    2   12   18     -5.25      0.00
    2   12   20    -22.56      0.00
    2   12   22      8.47      0.00
    2   12   24     -2.26      0.00
    2   12   26     -9.46      0.00
    2   12   28     -2.10      0.00
    2   12   30      6.02      0.00
    2   12   32      3.47      0.00
    2   12   34      0.78      0.00
    2   12   36     -1.75      0.00
    2   12   38     -0.35      0.00
    2   12   40     -1.17      0.00
    2   12   42     -3.53      0.00
    2   14    0      3.73      0.00
    2   14    2     -3.74      0.00
    2   14    4     23.66      0.00
    2   14    6      9.59      0.00
    2   14    8     18.47      0.00
    2   14   10     -6.36      0.00
    2   14   12     27.37      0.00
    2   14   14    -17.63      0.00
    2   14   16      1.40      0.00
    2   14   18     25.38      0.00
    2   14   20      5.58      0.00
    2   14   22      6.17      0.00
    2   14   24     -2.07      0.00
    2   14   26     -1.31      0.00
    2   14   28     -5.71      0.00
    2   14   30     -0.90      0.00
    2   14   32     -2.25      0.00
    2   14   34      6.80      0.00
    2   14   36      5.97      0.00
    2   14   38     -0.86      0.00
    2   14   40     -9.36      0.00
    2   14   42     -3.14      0.00
    2   16    0    -23.03      0.00
    2   16    2    -16.57      0.00
    2   16    4     -2.33      0.00
    2   16    6      5.00      0.00
    2   16    8     24.97      0.00
    2   16   10      6.22      0.00
    2   16   12     -2.14      0.00
    2   16   14    -24.70      0.00
    2   16   16    -21.73      0.00
    2   16   18      2.52      0.00
    2   16   20      4.72      0.00
    2   16   22     13.08      0.00
    2   16   24      3.65      0.00
    2   16   26     -0.01      0.00
    2   16   28      0.02      0.00
    2   16   30     -5.34      0.00
    2   16   32     -7.48      0.00
    2   16   34     -0.55      0.00
    2   16   36     -1.93      0.00
    2   16   38     -1.88      0.00
    2   16   40      1.21      0.00
    2   18    0    -20.79      0.00
    2   18    2     -5.51      0.00
    2   18    4      6.42      0.00
    2   18    6     24.03      0.00
    2   18    8     10.55      0.00
    2   18   10    -22.36      0.00
    2   18   12    -10.86      0.00
    2   18   14      9.42      0.00
    2   18   16      4.39      0.00
    2   18   18      6.72      0.00
    2   18   20    -12.52      0.00
    2   18   22     -9.06      0.00
    2   18   24     -0.88      0.00
    2   18   26     -8.63      0.00
    2   18   28     -8.14      0.00
    2   18   30     -2.00      0.00
    2   18   32     11.49      0.00
    2   18   34      7.61      0.00
    2   18   36      1.41      0.00
    2   18   38      1.85      0.00
    2   20    0     -3.74      0.00
    2   20    2      4.60      0.00
    2   20    4     -4.50      0.00
    2   20    6     -0.89      0.00
    2   20    8     -2.18      0.00
    2   20   10      2.98      0.00
    2   20   12     -1.34      0.00
    2   20   14    -13.75      0.00
    2   20   16    -15.30      0.00
    2   20   18      7.59      0.00
    2   20   20     15.33      0.00
    2   20   22      9.75      0.00
    2   20   24      1.21      0.00
    2   20   26     -7.25      0.00
    2   20   28      4.12      0.00
    2   20   30     -0.31      0.00
    2   20   32     -0.66      0.00
    2   20   34      2.26      0.00
    2   20   36     -1.02      0.00
    2   22    0    -10.17      0.00
    2   22    2      1.83      0.00
    2   22    4      0.60      0.00
    2   22    6      2.08      0.00
    2   22    8      2.16      0.00
    2   22   10      4.81      0.00
    2   22   12      3.82      0.00
    2   22   14      6.73      0.00
    2   22   16      0.31      0.00
    2   22   18     -1.33      0.00
    2   22   20     -7.46      0.00
    2   22   22     -6.40      0.00
    2   22   24      1.69      0.00
    2   22   26      2.75      0.00
    2   22   28      4.73      0.00
    2   22   30     -3.23      0.00
    2   22   32     -6.38      0.00
    2   22   34      0.80      0.00
    2   24    0    -12.39      0.00
    2   24    2     -5.24      0.00
    2   24    4      5.09      0.00
    2   24    6     17.69      0.00
    2   24    8     12.68      0.00
    2   24   10     -4.61      0.00
    2   24   12     -7.43      0.00
    2   24   14      1.87      0.00
    2   24   16      1.06      0.00
    2   24   18      0.29      0.00
    2   24   20      1.85      0.00
    2   24   22      6.84      0.00
    2   24   24    -10.23      0.00
    2   24   26     -5.85      0.00
    2   24   28     -5.60      0.00
    2   24   30     -5.80      0.00
    2   26    0      0.67      0.00
    2   26    2      0.38      0.00
    2   26    4     -1.76      0.00
    2   26    6     -5.45      0.00
    2   26    8     -5.94      0.00
    2   26   10     -8.81      0.00
    2   26   12     -1.54      0.00
    2   26   14      0.85      0.00
    2   26   16     -1.13      0.00
    2   26   18      6.16      0.00
    2   26   20      5.48      0.00
    2   26   22     -4.73      0.00
    2   26   24     -4.96      0.00
    2   26   26      9.90      0.00
    2   28    0      4.55      0.00
    2   28    2      0.12      0.00
    2   28    4     -1.40      0.00
    2   28    6     -1.04      0.00
    2   28    8     -2.76      0.00
    2   28   10     -0.56      0.00
    2   28   12      6.63      0.00
    2   28   14      0.20      0.00
    2   28   16     -2.46      0.00
    2   28   18     -8.23      0.00
    2   28   20    -10.13      0.00
    2   28   22      0.72      0.00
    2   28   24     14.21      0.00
    2   30    0     -1.98      0.00
    2   30    2     -3.74      0.00
    2   30    4     -0.69      0.00
    2   30    6      7.25      0.00
    2   30    8      5.70      0.00
    2   30   10      5.26      0.00
    2   30   12      1.43      0.00
    2   30   14     -8.36      0.00
    2   30   16     -7.90      0.00
    2   30   18     -0.26      0.00
    2   32    0     -8.46      0.00
    2   32    2     -2.15      0.00
    2   32    4      1.71      0.00
    2   32    6      3.17      0.00
    2   32    8      1.57      0.00
    2   32   10     -0.22      0.00
    2   32   12     -1.99      0.00
    3    1    1   -339.98      0.00
    3    1    3     10.01      0.00
    3    1    5    -44.61      0.00
    3    1    7      1.79      0.00
    3    1    9    113.98      0.00
    3    1   11    -26.73      0.00
    3    1   13      4.91      0.00
    3    1   15    -33.65      0.00
    3    1   17      1.82      0.00
    3    1   19    -12.80      0.00
    3    1   21     21.38      0.00
    3    1   23     -5.19      0.00
    3    1   25     -6.91      0.00
    3    1   27      8.97      0.00
    3    1   29    -13.74      0.00
    3    1   31     -0.34      0.00
    3    1   33      9.34      0.00
    3    1   35      6.22      0.00
    3    1   37      2.92      0.00
    3    1   39     -5.09      0.00
    3    1   41     -0.37      0.00
    3    1   43     10.18      0.00
    3    1   45     -5.04      0.00
    3    3    1    -12.04      0.00
    3    3    3     23.17      0.00
    3    3    5    -11.49      0.00
    3    3    7    -49.91      0.00
    3    3    9     23.77      0.00
    3    3   11    -64.69      0.00
    3    3   13     17.62      0.00
    3    3   15     42.38      0.00
    3    3   17     12.40      0.00
    3    3   19      1.05      0.00
    3    3   21     -5.79      0.00
    3    3   23     -7.90      0.00
    3    3   25     10.93      0.00
    3    3   27      9.29      0.00
    3    3   29     10.05      0.00
    3    3   31      5.37      0.00
    3    3   33      1.69      0.00
    3    3   35     -5.31      0.00
    3    3   37     -0.33      0.00
    3    3   39     11.12      0.00
    3    3   41     -4.28      0.00
    3    3   43     -5.95      0.00
    3    3   45      1.43      0.00
    3    5    1   -187.49      0.00
    3    5    3    128.09      0.00
    3    5    5    172.21      0.00
    3    5    7    -16.77      0.00
    3    5    9     74.39      0.00
    3    5   11     37.30      0.00
    3    5   13     27.38      0.00
    3    5   15     17.94      0.00
    3    5   17    -25.01      0.00
    3    5   19      6.22      0.00
    3    5   21      1.85      0.00
    3    5   23      2.90      0.00
    3    5   25      1.33      0.00
    3    5   27     -7.23      0.00
    3    5   29     -2.97      0.00
    3    5   31    -16.94      0.00
    3    5   33      5.71      0.00
    3    5   35      7.94      0.00
    3    5   37     -3.13      0.00
    3    5   39      1.00      0.00
    3    5   41     -2.32      0.00
    3    5   43      1.95      0.00
    3    5   45     15.08      0.00
    3    7    1    -21.44      0.00
    3    7    3     84.43      0.00
    3    7    5      9.34      0.00
    3    7    7    -32.44      0.00
    3    7    9     38.46      0.00
    3    7   11    -11.07      0.00
    3    7   13    -69.27      0.00
    3    7   15    -50.30      0.00
    3    7   17     -7.71      0.00
    3    7   19     31.15      0.00
    3    7   21     33.36      0.00
    3    7   23     13.08      0.00
    3    7   25     -2.14      0.00
    3    7   27      4.29      0.00
    3    7   29     -0.45      0.00
    3    7   31    -13.87      0.00
    3    7   33     -1.16      0.00
    3    7   35     -3.26      0.00
    3    7   37     -1.93      0.00
    3    7   39     -1.42      0.00
    3    7   41      0.89      0.00
    3    7   43     -2.28      0.00
    3    7   45      7.58      0.00
    3    9    1     24.85      0.00
    3    9    3     23.59      0.00
    3    9    5    -16.94      0.00
    3    9    7     28.62      0.00
    3    9    9      3.96      0.00
    3    9   11     -3.49      0.00
    3    9   13     -0.81      0.00
    3    9   15     37.31      0.00
    3    9   17      0.80      0.00
    3    9   19    -27.78      0.00
    3    9   21      0.60      0.00
    3    9   23     -6.42      0.00
    3    9   25     -3.63      0.00
    3    9   27     -1.07      0.00
    3    9   29      1.76      0.00
    3    9   31      7.64      0.00
    3    9   33     -6.44      0.00
    3    9   35    -10.07      0.00
    3    9   37      8.04      0.00
    3    9   39      5.77      0.00
    3    9   41      5.02      0.00
    3    9   43      1.87      0.00
    3    9   45      7.19      0.00
    3   11    1    -30.45      0.00
    3   11    3      9.74      0.00
    3   11    5      3.79      0.00
    3   11    7     -7.29      0.00
    3   11    9    -13.12      0.00
    3   11   11      0.71      0.00
    3   11   13    -25.40      0.00
    3   11   15      7.02      0.00
    3   11   17    -19.62      0.00
    3   11   19      1.06      0.00
    3   11   21     19.13      0.00
    3   11   23    -10.09      0.00
    3   11   25      6.61      0.00
    3   11   27      0.10      0.00
    3   11   29    -11.92      0.00
    3   11   31     -6.22      0.00
    3   11   33     -4.23      0.00
    3   11   35     11.70      0.00
    3   11   37      5.89      0.00
    3   11   39     -9.41      0.00
    3   11   41     -2.70      0.00
    3   11   43      1.66      0.00
    3   13    1    -22.91      0.00
    3   13    3    -23.58      0.00
    3   13    5      2.78      0.00
    3   13    7      6.97      0.00
    3   13    9     34.08      0.00
    3   13   11     22.88      0.00
    3   13   13    -20.56      0.00
    3   13   15    -20.66      0.00
    3   13   17    -19.39      0.00
    3   13   19     15.57      0.00
    3   13   21     19.30      0.00
    3   13   23     -6.03      0.00
    3   13   25      6.40      0.00
    3   13   27      6.02      0.00
    3   13   29     -0.55      0.00
    3   13   31      0.59      0.00
    3   13   33     -9.08      0.00
    3   13   35      0.91      0.00
    3   13   37     -6.76      0.00
    3   13   39     -2.07      0.00
    3   13   41      8.37      0.00
    3   13   43     -2.23      0.00
    3   15    1     12.18      0.00
    3   15    3      1.17      0.00
    3   15    5     32.02      0.00
    3   15    7      3.44      0.00
    3   15    9    -11.85      0.00
    3   15   11    -15.95      0.00
    3   15   13     20.11      0.00
    3   15   15     23.23      0.00
    3   15   17      8.12      0.00
    3   15   19     -6.94      0.00
    3   15   21     -6.15      0.00
    3   15   23     -7.10      0.00
    3   15   25      0.99      0.00
    3   15   27     -8.43      0.00
    3   15   29    -11.10      0.00
    3   15   31     10.45      0.00
    3   15   33     -1.99      0.00
    3   15   35     -2.03      0.00
    3   15   37      1.72      0.00
    3   15   39      3.53      0.00
    3   15   41     -1.83      0.00
    3   17    1     -6.02      0.00
    3   17    3     -9.83      0.00
    3   17    5      3.64      0.00
    3   17    7    -15.09      0.00
    3   17    9     14.58      0.00
    3   17   11      4.40      0.00
    3   17   13     -7.37      0.00
    3   17   15    -19.96      0.00
    3   17   17     -8.37      0.00
    3   17   19      1.31      0.00
    3   17   21     10.16      0.00
    3   17   23      1.77      0.00
    3   17   25     -1.01      0.00
    3   17   27      2.49      0.00
    3   17   29     -2.44      0.00
    3   17   31      3.49      0.00
    3   17   33     -0.33      0.00
    3   17   35      6.14      0.00
    3   17   37      2.65      0.00
    3   17   39     -5.68      0.00
    3   19    1      7.04      0.00
    3   19    3      3.49      0.00
    3   19    5      3.75      0.00
    3   19    7    -12.06      0.00
    3   19    9     11.69      0.00
    3   19   11      4.42      0.00
    3   19   13      3.21      0.00
    3   19   15      5.29      0.00
    3   19   17      0.99      0.00
    3   19   19     -0.72      0.00
    3   19   21     -4.84      0.00
    3   19   23     -3.51      0.00
    3   19   25      0.75      0.00
    3   19   27     12.54      0.00
    3   19   29      1.45      0.00
    3   19   31     -7.90      0.00
    3   19   33     -5.38      0.00
    3   19   35      0.71      0.00
    3   19   37     -2.51      0.00
    3   21    1     -9.01      0.00
    3   21    3     -8.16      0.00
    3   21    5      9.37      0.00
    3   21    7      9.14      0.00
    3   21    9     -2.25      0.00
    3   21   11    -15.31      0.00
    3   21   13     -7.69      0.00
    3   21   15      0.76      0.00
    3   21   17     -5.11      0.00
    3   21   19     -1.79      0.00
    3   21   21      0.33      0.00
    3   21   23      4.72      0.00
    3   21   25     -2.16      0.00
    3   21   27     -8.66      0.00
    3   21   29    -10.61      0.00
    3   21   31      2.24      0.00
    3   21   33      7.38      0.00
    3   21   35     -0.44      0.00
    3   23    1      4.17      0.00
    3   23    3      3.21      0.00
    3   23    5     -4.81      0.00
    3   23    7     -9.57      0.00
    3   23    9     -7.50      0.00
    3   23   11     -2.88      0.00
    3   23   13      0.23      0.00
    3   23   15      4.33      0.00
    3   23   17      3.67      0.00
    3   23   19     10.70      0.00
    3   23   21      7.71      0.00
    3   23   23     -7.23      0.00
    3   23   25     -2.71      0.00
    3   23   27      2.01      0.00
    3   23   29      0.40      0.00
    3   23   31      6.40      0.00
    3   25    1      3.15      0.00
    3   25    3      9.51      0.00
    3   25    5      2.24      0.00
    3   25    7     -4.14      0.00
    3   25    9      3.06      0.00
    3   25   11      9.53      0.00
    3   25   13      6.95      0.00
    3   25   15      4.56      0.00
    3   25   17     -4.35      0.00
    3   25   19    -12.44      0.00
    3   25   21     -1.59      0.00
    3   25   23      2.33      0.00
    3   25   25     -1.02      0.00
    3   25   27     -2.87      0.00
    3   27    1    -10.91      0.00
    3   27    3     -4.93      0.00
    3   27    5     -1.88      0.00
    3   27    7     -3.89      0.00
    3   27    9     -5.15      0.00
    3   27   11     -8.72      0.00
    3   27   13     -7.61      0.00
    3   27   15     -3.38      0.00
    3   27   17      1.25      0.00
    3   27   19      0.90      0.00
    3   27   21      5.89      0.00
    3   27   23     -3.02      0.00
    3   27   25    -20.00      0.00
    3   29    1      4.01      0.00
    3   29    3      6.99      0.00
    3   29    5     -2.08      0.00
    3   29    7     -0.59      0.00
    3   29    9      0.10      0.00
    3   29   11     -4.78      0.00
    3   29   13     -0.33      0.00
    3   29   15     -1.43      0.00
    3   29   17      1.64      0.00
    3   29   19      2.46      0.00
    3   29   21     -4.25      0.00
    3   31    1     -0.62      0.00
    3   31    3      2.64      0.00
    3   31    5     -1.66      0.00
    3   31    7      1.14      0.00
    3   31    9     -3.92      0.00
    3   31   11     -2.63      0.00
    3   31   13      2.89      0.00
    3   31   15     -2.01      0.00
    4    0    0    137.54      0.00
    4    0    2   -200.27      0.00
    4    0    4   -167.58      0.00
    4    0    6    -87.56      0.00
    4    0    8    -62.98      0.00
    4    0   10    -11.37      0.00
    4    0   12     36.07      0.00
    4    0   14     23.30      0.00
    4    0   16     40.64      0.00
    4    0   18      2.46      0.00
    4    0   20    -11.41      0.00
    4    0   22    -47.51      0.00
    4    0   24      3.50      0.00
    4    0   26      0.35      0.00
    4    0   28     19.28      0.00
    4    0   30     22.02      0.00
    4    0   32     -7.95      0.00
    4    0   34     -7.96      0.00
    4    0   36      1.92      0.00
    4    0   38      5.91      0.00
    4    0   40     15.96      0.00
    4    0   42      2.19      0.00
    4    0   44    -25.57      0.00
    4    2    4     85.53      0.00
    4    2    6     14.07      0.00
    4    2    8    -54.53      0.00
    4    2   10    -25.67      0.00
    4    2   12     32.46      0.00
    4    2   14     -0.48      0.00
    4    2   16     12.79      0.00
    4    2   18    -16.64      0.00
    4    2   20    -23.83      0.00
    4    2   22    -24.46      0.00
    4    2   24     12.22      0.00
    4    2   26     10.88      0.00
    4    2   28      9.13      0.00
    4    2   30     -0.69      0.00
    4    2   32    -10.02      0.00
    4    2   34     -3.63      0.00
    4    2   36      9.39      0.00
    4    2   38     -2.20      0.00
    4    2   40     -6.84      0.00
    4    2   42     -2.82      0.00
    4    2   44     -1.19      0.00
    4    2   46      3.60      0.00
    4    4    0   -126.48      0.00
    4    4    2     -0.98      0.00
    4    4    4    128.13      0.00
    4    4    6     -7.10      0.00
    4    4    8    -12.37      0.00
    4    4   10    -31.06      0.00
    4    4   12     28.59      0.00
    4    4   14    -13.37      0.00
    4    4   16     -3.18      0.00
    4    4   18      5.01      0.00
    4    4   20     -3.38      0.00
    4    4   22      1.20      0.00
    4    4   24    -10.60      0.00
    4    4   26      7.36      0.00
    4    4   28      7.62      0.00
    4    4   30      8.76      0.00
    4    4   32      5.68      0.00
    4    4   34     -7.09      0.00
    4    4   36      6.22      0.00
    4    4   38     -5.17      0.00
    4    4   40     -2.38      0.00
    4    4   42      5.39      0.00
    4    4   44      1.57      0.00
    4    6    0    150.02      0.00
    4    6    2    102.03      0.00
    4    6    4    -20.13      0.00
    4    6    6    -75.25      0.00
    4    6    8     -6.87      0.00
    4    6   10      2.40      0.00
    4    6   12     64.39      0.00
    4    6   14     53.02      0.00
    4    6   16     23.28      0.00
    4    6   18     13.30      0.00
    4    6   20    -35.16      0.00
    4    6   22    -20.05      0.00
    4    6   24     -4.42      0.00
    4    6   26     17.61      0.00
    4    6   28      5.79      0.00
    4    6   30     13.57      0.00
    4    6   32     -5.98      0.00
    4    6   34    -26.39      0.00
    4    6   36      0.02      0.00
    4    6   38      3.17      0.00
    4    6   40      5.05      0.00
    4    6   42      3.98      0.00
    4    6   44      3.59      0.00
    4    8    0     56.27      0.00
    4    8    2     54.46      0.00
    4    8    4     69.01      0.00
    4    8    6     26.30      0.00
    4    8    8     -3.36      0.00
    4    8   10      4.53      0.00
    4    8   12     -5.33      0.00
    4    8   14     10.64      0.00
    4    8   16    -23.08      0.00
    4    8   18     13.78      0.00
    4    8   20     -5.59      0.00
    4    8   22      6.87      0.00
    4    8   24      5.90      0.00
    4    8   26      5.71      0.00
    4    8   28      2.40      0.00
    4    8   30     -2.13      0.00
    4    8   32    -12.97      0.00
    4    8   34     -7.08      0.00
    4    8   36      8.86      0.00
    4    8   38     -1.23      0.00
    4    8   40      0.37      0.00
    4    8   42      3.36      0.00
    4    8   44      5.46      0.00
    4   10    0     15.09      0.00
    4   10    2    -22.07      0.00
    4   10    4    -34.19      0.00
    4   10    6    -39.93      0.00
    4   10    8     -0.97      0.00
    4   10   10     30.74      0.00
    4   10   12      3.29      0.00
    4   10   14      3.64      0.00
    4   10   16    -33.51      0.00
    4   10   18      7.67      0.00
    4   10   20    -19.23      0.00
    4   10   22     -8.99      0.00
    4   10   24     -3.56      0.00
    4   10   26      0.59      0.00
    4   10   28     13.73      0.00
    4   10   30      3.74      0.00
    4   10   32     -3.83      0.00
    4   10   34     -6.37      0.00
    4   10   36     -2.37      0.00
    4   10   38      0.78      0.00
    4   10   40      9.91      0.00
    4   10   42      5.34      0.00
    4   10   44     -5.82      0.00
    4   12    0     64.22      0.00
    4   12    2     25.48      0.00
    4   12    4      3.61      0.00
    4   12    6      6.09      0.00
    4   12    8      6.67      0.00
    4   12   10    -20.11      0.00
    4   12   12      8.28      0.00
    4   12   14     40.95      0.00
    4   12   16     10.61      0.00
    4   12   18      6.23      0.00
    4   12   20    -19.05      0.00
    4   12   22     -8.40      0.00
    4   12   24     -0.08      0.00
    4   12   26     -8.43      0.00
    4   12   28      6.12      0.00
    4   12   30      2.74      0.00
    4   12   32     -1.12      0.00
    4   12   34     -8.46      0.00
    4   12   36     -5.48      0.00
    4   12   38      5.63      0.00
    4   12   40     -0.61      0.00
    4   12   42      2.62      0.00
    4   14    0    -18.14      0.00
    4   14    2    -16.85      0.00
    4   14    4    -21.36      0.00
    4   14    6    -43.77      0.00
    4   14    8    -18.57      0.00
    4   14   10      7.26      0.00
    4   14   12     16.65      0.00
    4   14   14      0.31      0.00
    4   14   16    -21.31      0.00
    4   14   18    -10.41      0.00
    4   14   20     -9.38      0.00
    4   14   22    -11.33      0.00
    4   14   24     11.85      0.00
    4   14   26      1.50      0.00
    4   14   28      7.83      0.00
    4   14   30     -1.45      0.00
    4   14   32     -5.98      0.00
    4   14   34      1.74      0.00
    4   14   36      2.23      0.00
    4   14   38      1.98      0.00
    4   14   40     -6.94      0.00
    4   16    0     22.99      0.00
    4   16    2     22.97      0.00
    4   16    4      3.41      0.00
    4   16    6    -13.51      0.00
    4   16    8      2.49      0.00
    4   16   10      9.38      0.00
    4   16   12     10.11      0.00
    4   16   14     14.73      0.00
    4   16   16      6.52      0.00
    4   16   18      8.00      0.00
    4   16   20      8.00      0.00
    4   16   22     -8.30      0.00
    4   16   24      1.33      0.00
    4   16   26      0.39      0.00
    4   16   28     14.89      0.00
    4   16   30      3.74      0.00
    4   16   32     -7.55      0.00
    4   16   34      0.53      0.00
    4   16   36     -5.78      0.00
    4   16   38     -1.86      0.00
    4   16   40      3.81      0.00
    4   18    0      3.20      0.00
    4   18    2      5.58      0.00
    4   18    4      0.65      0.00
    4   18    6      2.45      0.00
    4   18    8      2.93      0.00
    4   18   10     -4.30      0.00
    4   18   12      0.63      0.00
    4   18   14     10.14      0.00
    4   18   16     -2.21      0.00
    4   18   18    -11.73      0.00
    4   18   20     -6.32      0.00
    4   18   22      0.28      0.00
    4   18   24     12.83      0.00
[truncated: 153,222 more chars]
