# Supplementary material
Source: publisher figshare collection journal article supplement (https://acs.figshare.com/ndownloader/files/16775912)
Supplement: Supplementary file 1 [file 16775912 › LIFM-114-Toluene-solved.cif]

data_LIFM-114-Toluene
_audit_creation_date              2017-12-04
_audit_creation_method
;
Olex2 1.2
(compiled 2017.08.10 svn.r3458 for OlexSys, GUI svn.r5381)
;
_shelx_SHELXL_version_number      '2014/7'
_publ_contact_author_address      ?
_publ_contact_author_email        ?
_publ_contact_author_id_orcid     ?
_publ_contact_author_name         ''
_publ_contact_author_phone        ?
_publ_section_references
;
Dolomanov, O.V., Bourhis, L.J., Gildea, R.J, Howard, J.A.K. & Puschmann, H.
 (2009), J. Appl. Cryst. 42, 339-341.

Sheldrick, G.M. (2015). Acta Cryst. C71, 3-8.
;
_chemical_name_common             LIFM-114-Toluene
_chemical_name_systematic         ?
_chemical_formula_moiety         'C108 H64 O32 Zr6 [+ solvent]'
_chemical_formula_sum             'C108 H64 O32 Zr6'
_chemical_formula_weight          2420.91
_chemical_melting_point           ?
loop_
  _atom_type_symbol
  _atom_type_description
  _atom_type_scat_dispersion_real
  _atom_type_scat_dispersion_imag
  _atom_type_scat_source
 'C' 'C' 0.0181 0.0091 'International Tables Vol C Tables 4.2.6.8 and 6.1.1.4'
 'H' 'H' 0.0000 0.0000 'International Tables Vol C Tables 4.2.6.8 and 6.1.1.4'
 'O' 'O' 0.0492 0.0322 'International Tables Vol C Tables 4.2.6.8 and 6.1.1.4'
 'Zr' 'Zr' -0.1862 2.2449
 'International Tables Vol C Tables 4.2.6.8 and 6.1.1.4'

_shelx_space_group_comment
;
The symmetry employed for this shelxl refinement is uniquely defined
by the following loop, which should always be used as a source of
symmetry information in preference to the above space-group names.
They are only intended as comments.
;
_space_group_crystal_system       'orthorhombic'
_space_group_IT_number            63
_space_group_name_H-M_alt         'C m c m'
_space_group_name_Hall            '-C 2c 2'
loop_
  _space_group_symop_operation_xyz
 'x, y, z'
 '-x, -y, z+1/2'
 'x, -y, -z'
 '-x, y, -z+1/2'
 'x+1/2, y+1/2, z'
 '-x+1/2, -y+1/2, z+1/2'
 'x+1/2, -y+1/2, -z'
 '-x+1/2, y+1/2, -z+1/2'
 '-x, -y, -z'
 'x, y, -z-1/2'
 '-x, y, z'
 'x, -y, z-1/2'
 '-x+1/2, -y+1/2, -z'
 'x+1/2, y+1/2, -z-1/2'
 '-x+1/2, y+1/2, z'
 'x+1/2, -y+1/2, z-1/2'

_cell_length_a                    26.6952(15)
_cell_length_b                    41.2943(11)
_cell_length_c                    16.8339(6)
_cell_angle_alpha                 90
_cell_angle_beta                  90
_cell_angle_gamma                 90
_cell_volume                      18557.0(13)
_cell_formula_units_Z             4
_cell_measurement_reflns_used     7581
_cell_measurement_temperature     150(2)
_cell_measurement_theta_max       65.2550
_cell_measurement_theta_min       4.4440
_shelx_estimated_absorpt_T_max    ?
_shelx_estimated_absorpt_T_min    ?
_exptl_absorpt_coefficient_mu     3.045
_exptl_absorpt_correction_T_max   1.00000
_exptl_absorpt_correction_T_min   0.26384
_exptl_absorpt_correction_type    multi-scan
_exptl_absorpt_process_details
;
CrysAlisPro 1.171.38.43 (Rigaku Oxford Diffraction, 2015)
Empirical absorption correction using spherical harmonics,
 implemented in SCALE3 ABSPACK scaling algorithm.
;
_exptl_absorpt_special_details    ?
_exptl_crystal_colour             Colourless
_exptl_crystal_density_diffrn     0.867
_exptl_crystal_density_meas       ?
_exptl_crystal_density_method     ?
_exptl_crystal_description        Rod
_exptl_crystal_F_000              4832
_exptl_crystal_size_max           0.3
_exptl_crystal_size_mid           0.1
_exptl_crystal_size_min           0.1
_exptl_transmission_factor_max    ?
_exptl_transmission_factor_min    ?
_diffrn_reflns_av_R_equivalents   0.0497
_diffrn_reflns_av_unetI/netI      0.0500
_diffrn_reflns_Laue_measured_fraction_full 0.976
_diffrn_reflns_Laue_measured_fraction_max 0.976
_diffrn_reflns_limit_h_max        18
_diffrn_reflns_limit_h_min        -31
_diffrn_reflns_limit_k_max        30
_diffrn_reflns_limit_k_min        -48
_diffrn_reflns_limit_l_max        19
_diffrn_reflns_limit_l_min        -11
_diffrn_reflns_number             22133
_diffrn_reflns_point_group_measured_fraction_full 0.976
_diffrn_reflns_point_group_measured_fraction_max 0.976
_diffrn_reflns_theta_full         65.362
_diffrn_reflns_theta_max          65.362
_diffrn_reflns_theta_min          3.283
_diffrn_ambient_environment       N~2~
_diffrn_ambient_temperature       150(2)
_diffrn_detector                  'CCD plate'
_diffrn_detector_area_resol_mean  10.6525
_diffrn_detector_type             Atlas
_diffrn_measured_fraction_theta_full 0.976
_diffrn_measured_fraction_theta_max 0.976
_diffrn_measurement_details
;
List of Runs (angles in degrees, time in seconds):

  # Type    Start    End  Width  t~exp~   \w     \q     \k     \f   Frames
--------------------------------------------------------------------------
  1  \w    -75.00  39.00   1.00   70.00    --  -41.14  19.00  60.00  114
  2  \w      4.00  31.00   1.00   70.00    --   41.14 -99.00 -90.00   27
  3  \w     78.00 160.00   1.00   72.00    --   89.96  61.00-180.00   82
  4  \w    102.00 138.00   1.00   72.00    --   89.96 125.00  30.00   36
  5  \w    124.00 158.00   1.00   72.00    --   89.96 125.00-180.00   34
  6  \w     97.00 160.00   1.00   72.00    --   89.96 125.00  90.00   63
  7  \w     72.00 109.00   1.00   72.00    --   89.96  30.00-180.00   37
;
_diffrn_measurement_device        'four-circle diffractometer'
_diffrn_measurement_device_type   'SuperNova, Dual, Cu at zero, Atlas'
_diffrn_measurement_method        '\w scans'
_diffrn_orient_matrix_type
'CrysAlisPro convention (1999,Acta A55,543-557)'
_diffrn_orient_matrix_UB_11       -0.0475539000
_diffrn_orient_matrix_UB_12       -0.0202901000
_diffrn_orient_matrix_UB_13       0.0144380000
_diffrn_orient_matrix_UB_21       0.0061350000
_diffrn_orient_matrix_UB_22       -0.0157258000
_diffrn_orient_matrix_UB_23       -0.0824224000
_diffrn_orient_matrix_UB_31       0.0320752000
_diffrn_orient_matrix_UB_32       -0.0270795000
_diffrn_orient_matrix_UB_33       0.0371522000
_diffrn_radiation_monochromator   mirror
_diffrn_radiation_probe           x-ray
_diffrn_radiation_type            CuK\a
_diffrn_radiation_wavelength      1.54184
_diffrn_source                    'micro-focus sealed X-ray tube'
_diffrn_source_type               'SuperNova (Cu) X-ray Source'
_reflns_Friedel_coverage          0.000
_reflns_Friedel_fraction_full     .
_reflns_Friedel_fraction_max      .
_reflns_number_gt                 6126
_reflns_number_total              8263
_reflns_odcompleteness_completeness 99.81
_reflns_odcompleteness_iscentric  1
_reflns_odcompleteness_theta      61.08
_reflns_special_details
;
 Reflections were merged by SHELXL according to the crystal
 class for the calculation of statistics and refinement.
 
 Structure factors included contributions from the .fab file.
 
 _reflns_Friedel_fraction is defined as the number of unique
 Friedel pairs measured divided by the number that would be
 possible theoretically, ignoring centric projections and
 systematic absences.
;
_reflns_threshold_expression      'I > 2\s(I)'
_computing_cell_refinement        'CrysAlisPro 1.171.38.43 (Rigaku OD, 2015)'
_computing_data_collection        'CrysAlisPro 1.171.38.43 (Rigaku OD, 2015)'
_computing_data_reduction         'CrysAlisPro 1.171.38.43 (Rigaku OD, 2015)'
_computing_molecular_graphics     'Olex2 (Dolomanov et al., 2009)'
_computing_publication_material   'Olex2 (Dolomanov et al., 2009)'
_computing_structure_refinement   'ShelXL (Sheldrick, 2015)'
_computing_structure_solution     ?
_refine_diff_density_max          2.537
_refine_diff_density_min          -1.900
_refine_diff_density_rms          0.126
_refine_ls_extinction_coef        .
_refine_ls_extinction_method      none
_refine_ls_goodness_of_fit_ref    1.065
_refine_ls_hydrogen_treatment     constr
_refine_ls_matrix_type            full
_refine_ls_number_parameters      411
_refine_ls_number_reflns          8263
_refine_ls_number_restraints      48
_refine_ls_R_factor_all           0.0962
_refine_ls_R_factor_gt            0.0808
_refine_ls_restrained_S_all       1.068
_refine_ls_shift/su_max           0.001
_refine_ls_shift/su_mean          0.000
_refine_ls_structure_factor_coef  Fsqd
_refine_ls_weighting_details
'w=1/[\s^2^(Fo^2^)+(0.1344P)^2^+149.8417P] where P=(Fo^2^+2Fc^2^)/3'
_refine_ls_weighting_scheme       calc
_refine_ls_wR_factor_gt           0.2438
_refine_ls_wR_factor_ref          0.2535
_refine_special_details           ?
_olex2_refinement_description
;
1. Fixed Uiso
 At 1.2 times of:
  All C(H) groups
2. Rigid bond restraints
 C2, C3, C4, C5, C6, C7
 with sigma for 1-2 distances of 0.01 and sigma for 1-3 distances of 0.01
3. Uiso/Uaniso restraints and constraints
C2 \\sim C3 \\sim C4 \\sim C5 \\sim C6 \\sim C7: within 2A with sigma of 0.01
and sigma for terminal atoms of 0.02
4. Others
 Fixed Sof: C9(0.5) H9(0.5) C10(0.5) H10(0.5) C12(0.5) H12(0.5) C13(0.5)
 H13(0.5) C16(0.5) H16(0.5) C17(0.5) H17(0.5) C19(0.5) H19(0.5) C20(0.5)
 H20(0.5) C9A(0.5) H9A(0.5) C10A(0.5) H10A(0.5) C12A(0.5) H12A(0.5) C13A(0.5)
 H13A(0.5) C16A(0.5) H16A(0.5) C17A(0.5) H17A(0.5) C19A(0.5) H19A(0.5)
 C20A(0.5) H20A(0.5)
5.a Aromatic/amide H refined with riding coordinates:
 C3(H3), C4(H4), C6(H6), C7(H7), C9(H9), C10(H10), C12(H12), C13(H13),
 C16(H16), C17(H17), C19(H19), C20(H20), C22(H22), C23(H23), C25(H25), C26(H26),
  C9A(H9A), C10A(H10A), C12A(H12A), C13A(H13A), C16A(H16A), C17A(H17A),
 C19A(H19A), C20A(H20A)
;
_atom_sites_solution_hydrogens    geom
_atom_sites_solution_primary      ?
_atom_sites_solution_secondary    ?
loop_
  _atom_site_label
  _atom_site_type_symbol
  _atom_site_fract_x
  _atom_site_fract_y
  _atom_site_fract_z
  _atom_site_U_iso_or_equiv
  _atom_site_adp_type
  _atom_site_occupancy
  _atom_site_site_symmetry_order
  _atom_site_calc_flag
  _atom_site_refinement_flags_posn
  _atom_site_refinement_flags_adp
  _atom_site_refinement_flags_occupancy
  _atom_site_disorder_assembly
  _atom_site_disorder_group
 Zr1 Zr 0.43395(2) 0.23808(2) 0.35405(3) 0.0403(2) Uani 1 1 d . . . . .
 Zr2 Zr 0.5000 0.29765(2) 0.2500 0.0319(3) Uani 1 4 d S T P . .
 Zr3 Zr 0.5000 0.17825(2) 0.2500 0.0297(3) Uani 1 4 d S T P . .
 O1 O 0.4068(2) 0.28644(12) 0.3982(3) 0.0640(16) Uani 1 1 d . . . . .
 O2 O 0.4516(2) 0.32468(10) 0.3302(3) 0.0508(14) Uani 1 1 d . . . . .
 O3 O 0.0958(2) 0.68935(11) 0.3919(3) 0.0626(16) Uani 1 1 d . . . . .
 O4 O 0.05103(18) 0.65116(10) 0.3296(3) 0.0413(11) Uani 1 1 d . . . . .
 O5 O 0.5000 0.26414(16) 0.3443(5) 0.062(2) Uani 1 2 d S T P . .
 O6 O 0.4291(4) 0.27069(16) 0.2500 0.065(3) Uani 1 2 d S T P . .
 O7 O 0.4424(4) 0.21175(18) 0.2500 0.071(3) Uani 1 2 d S T P . .
 O8 O 0.5000 0.20651(17) 0.3681(5) 0.061(2) Uani 1 2 d S T P . .
 O9 O 0.3518(2) 0.23839(12) 0.3158(6) 0.102(3) Uani 1 1 d . . . . .
 O10 O 0.4388(3) 0.23749(12) 0.4850(3) 0.082(2) Uani 1 1 d . . . . .
 C1 C 0.4201(4) 0.31587(16) 0.3840(5) 0.061(2) Uani 1 1 d . . . . .
 C2 C 0.3949(4) 0.34094(19) 0.4319(6) 0.080(2) Uani 1 1 d . U . . .
 C3 C 0.4133(5) 0.3717(2) 0.4326(7) 0.106(3) Uani 1 1 d . U . . .
 H3 H 0.4395 0.3770 0.3968 0.127 Uiso 1 1 calc R . . . .
 C4 C 0.3957(5) 0.3956(2) 0.4827(7) 0.105(3) Uani 1 1 d . U . . .
 H4 H 0.4135 0.4153 0.4895 0.126 Uiso 1 1 calc R . . . .
 C5 C 0.3512(4) 0.3897(2) 0.5230(6) 0.084(3) Uani 1 1 d . U . . .
 C6 C 0.3307(5) 0.3598(2) 0.5186(7) 0.098(3) Uani 1 1 d . U . . .
 H6 H 0.3006 0.3554 0.5466 0.118 Uiso 1 1 calc R . . . .
 C7 C 0.3531(4) 0.3353(2) 0.4738(7) 0.093(3) Uani 1 1 d . U . . .
 H7 H 0.3385 0.3144 0.4730 0.112 Uiso 1 1 calc R . . . .
 C8 C 0.3255(4) 0.4154(2) 0.5705(5) 0.067(3) Uani 1 1 d . . . . .
 C9 C 0.3560(9) 0.4337(4) 0.6294(11) 0.081(6) Uani 0.5 1 d . . . A 1
 H9 H 0.3909 0.4302 0.6362 0.097 Uiso 0.5 1 calc R . . A 1
 C10 C 0.3285(7) 0.4566(4) 0.6746(11) 0.069(5) Uani 0.5 1 d . . . A 1
 H10 H 0.3453 0.4680 0.7158 0.083 Uiso 0.5 1 calc R . . A 1
 C11 C 0.2785(4) 0.46317(19) 0.6614(5) 0.064(3) Uani 1 1 d . . . . .
 C12 C 0.2590(8) 0.4474(6) 0.6020(12) 0.093(8) Uani 0.5 1 d . . . A 1
 H12 H 0.2266 0.4544 0.5862 0.111 Uiso 0.5 1 calc R . . A 1
 C13 C 0.2783(9) 0.4221(6) 0.5588(12) 0.089(7) Uani 0.5 1 d . . . A 1
 H13 H 0.2583 0.4101 0.5224 0.107 Uiso 0.5 1 calc R . . A 1
 C14 C 0.2487(4) 0.48787(16) 0.7110(4) 0.061(2) Uani 1 1 d . . . . .
 C15 C 0.2237(4) 0.51347(18) 0.6619(4) 0.057(2) Uani 1 1 d . . . . .
 C16 C 0.2311(8) 0.5467(4) 0.6817(10) 0.072(6) Uani 0.5 1 d . . . B 1
 H16 H 0.2531 0.5523 0.7238 0.087 Uiso 0.5 1 calc R . . B 1
 C17 C 0.2059(9) 0.5711(4) 0.6396(12) 0.090(7) Uani 0.5 1 d . . . B 1
 H17 H 0.2086 0.5933 0.6545 0.109 Uiso 0.5 1 calc R . . B 1
 C18 C 0.1748(4) 0.5608(2) 0.5704(5) 0.060(2) Uani 1 1 d . . . . .
 C19 C 0.1692(8) 0.5290(4) 0.5567(9) 0.061(5) Uani 0.5 1 d . . . B 1
 H19 H 0.1492 0.5226 0.5128 0.074 Uiso 0.5 1 calc R . . B 1
 C20 C 0.1902(8) 0.5056(3) 0.6017(10) 0.066(5) Uani 0.5 1 d . . . B 1
 H20 H 0.1820 0.4836 0.5921 0.079 Uiso 0.5 1 calc R . . B 1
 C21 C 0.1516(3) 0.58717(18) 0.5221(5) 0.054(2) Uani 1 1 d . . . . .
 C22 C 0.1683(5) 0.6169(2) 0.5197(8) 0.101(4) Uani 1 1 d . . . . .
 H22 H 0.1976 0.6215 0.5495 0.121 Uiso 1 1 calc R . . . .
 C23 C 0.1470(4) 0.6423(2) 0.4775(7) 0.092(4) Uani 1 1 d . . . . .
 H23 H 0.1600 0.6637 0.4812 0.111 Uiso 1 1 calc R . . . .
 C24 C 0.1051(3) 0.63506(17) 0.4285(5) 0.056(2) Uani 1 1 d . . . . .
 C25 C 0.0874(4) 0.6038(2) 0.4286(6) 0.085(3) Uani 1 1 d . . . . .
 H25 H 0.0600 0.5980 0.3955 0.102 Uiso 1 1 calc R . . . .
 C26 C 0.1098(4) 0.5806(2) 0.4775(6) 0.084(3) Uani 1 1 d . . . . .
 H26 H 0.0956 0.5595 0.4800 0.101 Uiso 1 1 calc R . . . .
 C27 C 0.0831(3) 0.66080(16) 0.3801(4) 0.0459(18) Uani 1 1 d . . . . .
 C9A C 0.3356(9) 0.4480(4) 0.5625(12) 0.078(6) Uani 0.5 1 d . . . A 2
 H9A H 0.3612 0.4547 0.5268 0.093 Uiso 0.5 1 calc R . . A 2
 C10A C 0.3097(8) 0.4711(4) 0.6047(10) 0.063(5) Uani 0.5 1 d . . . A 2
 H10A H 0.3146 0.4934 0.5924 0.076 Uiso 0.5 1 calc R . . A 2
 C12A C 0.2583(10) 0.4285(4) 0.6694(11) 0.091(8) Uani 0.5 1 d . . . A 2
 H12A H 0.2300 0.4230 0.7005 0.109 Uiso 0.5 1 calc R . . A 2
 C13A C 0.2861(8) 0.4062(4) 0.6260(10) 0.073(6) Uani 0.5 1 d . . . A 2
 H13A H 0.2790 0.3838 0.6329 0.087 Uiso 0.5 1 calc R . . A 2
 C16A C 0.2515(8) 0.5297(5) 0.6065(10) 0.083(7) Uani 0.5 1 d . . . B 2
 H16A H 0.2857 0.5248 0.5966 0.100 Uiso 0.5 1 calc R . . B 2
 C17A C 0.2246(10) 0.5553(5) 0.5633(10) 0.090(8) Uani 0.5 1 d . . . B 2
 H17A H 0.2433 0.5688 0.5285 0.109 Uiso 0.5 1 calc R . . B 2
 C19A C 0.1490(7) 0.5394(4) 0.6149(12) 0.071(6) Uani 0.5 1 d . . . B 2
 H19A H 0.1135 0.5405 0.6138 0.085 Uiso 0.5 1 calc R . . B 2
 C20A C 0.1713(9) 0.5158(4) 0.6624(11) 0.078(6) Uani 0.5 1 d . . . B 2
 H20A H 0.1516 0.5017 0.6943 0.094 Uiso 0.5 1 calc R . . B 2

loop_
  _atom_site_aniso_label
  _atom_site_aniso_U_11
  _atom_site_aniso_U_22
  _atom_site_aniso_U_33
  _atom_site_aniso_U_23
  _atom_site_aniso_U_13
  _atom_site_aniso_U_12
 Zr1 0.0581(4) 0.0207(3) 0.0420(4) -0.0005(2) 0.0154(3) 0.0016(2)
 Zr2 0.0501(7) 0.0152(5) 0.0304(6) 0.000 0.000 0.000
 Zr3 0.0466(7) 0.0138(4) 0.0286(5) 0.000 0.000 0.000
 O1 0.084(4) 0.037(3) 0.071(4) -0.002(3) 0.030(3) 0.009(3)
 O2 0.076(4) 0.025(2) 0.052(3) -0.007(2) 0.023(3) 0.011(2)
 O3 0.092(4) 0.026(2) 0.070(4) 0.000(2) -0.030(3) 0.003(3)
 O4 0.049(3) 0.035(2) 0.041(3) -0.003(2) -0.003(2) 0.003(2)
 O5 0.069(5) 0.039(4) 0.079(6) 0.024(4) 0.000 0.000
 O6 0.120(8) 0.028(3) 0.047(4) 0.000 0.000 -0.024(4)
 O7 0.121(8) 0.046(4) 0.045(4) 0.000 0.000 0.031(5)
 O8 0.060(5) 0.040(4) 0.084(6) -0.026(4) 0.000 0.000
 O9 0.066(4) 0.032(3) 0.208(9) -0.002(4) 0.058(5) -0.003(3)
 O10 0.157(7) 0.052(3) 0.036(3) 0.001(2) 0.030(4) 0.003(4)
 C1 0.090(7) 0.021(3) 0.071(6) -0.006(3) 0.003(5) 0.004(4)
 C2 0.115(6) 0.041(3) 0.083(5) -0.019(4) 0.054(5) 0.008(4)
 C3 0.149(7) 0.046(4) 0.122(6) -0.016(4) 0.082(5) 0.000(4)
 C4 0.150(7) 0.045(4) 0.119(6) -0.021(4) 0.074(6) 0.005(4)
 C5 0.117(6) 0.042(3) 0.095(6) -0.012(4) 0.038(5) 0.025(4)
 C6 0.119(6) 0.059(4) 0.118(6) -0.026(5) 0.056(5) 0.008(4)
 C7 0.116(6) 0.052(4) 0.113(6) -0.026(4) 0.054(5) 0.000(4)
 C8 0.104(8) 0.057(5) 0.040(4) -0.009(4) 0.009(5) 0.037(5)
 C9 0.111(17) 0.071(12) 0.061(11) -0.039(10) -0.009(12) 0.034(12)
 C10 0.067(12) 0.075(11) 0.064(11) -0.031(10) 0.014(10) 0.025(10)
 C11 0.109(8) 0.045(4) 0.038(4) -0.002(4) 0.002(5) 0.043(5)
 C12 0.085(16) 0.127(18) 0.066(13) -0.042(13) -0.012(11) 0.065(14)
 C13 0.091(16) 0.114(17) 0.064(12) -0.017(12) 0.009(11) 0.060(14)
 C14 0.107(7) 0.046(4) 0.031(3) 0.001(3) 0.006(4) 0.043(4)
 C15 0.092(7) 0.048(4) 0.031(4) 0.001(3) -0.002(4) 0.040(4)
 C16 0.100(15) 0.059(10) 0.059(11) 0.008(8) -0.044(11) 0.015(10)
 C17 0.15(2) 0.040(9) 0.085(14) 0.010(9) -0.038(14) 0.037(11)
 C18 0.083(7) 0.055(5) 0.042(4) 0.010(4) -0.009(5) 0.029(5)
 C19 0.093(14) 0.064(10) 0.028(8) 0.007(7) -0.004(9) 0.028(10)
 C20 0.106(15) 0.029(7) 0.064(11) -0.001(7) -0.038(11) 0.011(8)
 C21 0.071(6) 0.044(4) 0.048(4) 0.012(3) 0.000(4) 0.018(4)
 C22 0.110(9) 0.067(6) 0.126(10) 0.027(6) -0.067(8) -0.003(6)
 C23 0.119(9) 0.049(5) 0.109(8) 0.028(5) -0.055(8) 0.006(5)
 C24 0.073(6) 0.036(4) 0.058(5) 0.012(3) -0.019(4) 0.005(4)
 C25 0.122(9) 0.049(5) 0.084(7) 0.021(5) -0.050(7) -0.012(5)
 C26 0.122(9) 0.042(4) 0.089(7) 0.026(5) -0.019(7) 0.016(5)
 C27 0.060(5) 0.034(4) 0.043(4) 0.006(3) -0.011(4) 0.016(3)
 C9A 0.117(18) 0.050(10) 0.066(12) -0.015(9) 0.016(12) 0.030(10)
 C10A 0.100(15) 0.038(8) 0.051(10) -0.006(7) 0.000(10) 0.018(9)
 C12A 0.17(2) 0.056(10) 0.047(10) 0.008(8) 0.009(13) 0.049(13)
 C13A 0.119(17) 0.046(9) 0.053(10) 0.005(8) 0.026(11) 0.034(10)
 C16A 0.094(15) 0.112(15) 0.044(9) 0.038(10) 0.035(10) 0.075(13)
 C17A 0.17(2) 0.074(12) 0.032(9) 0.029(8) 0.001(12) 0.053(14)
 C19A 0.067(12) 0.065(10) 0.082(13) 0.046(11) 0.001(11) 0.028(9)
 C20A 0.121(19) 0.056(10) 0.058(11) 0.008(9) 0.023(12) 0.036(11)

_geom_special_details
;
 All esds (except the esd in the dihedral angle between two l.s. planes)
 are estimated using the full covariance matrix.  The cell esds are taken
 into account individually in the estimation of esds in distances, angles
 and torsion angles; correlations between esds in cell parameters are only
 used when they are defined by crystal symmetry.  An approximate (isotropic)
 treatment of cell esds is used for estimating esds involving l.s. planes.
;
loop_
  _geom_bond_atom_site_label_1
  _geom_bond_atom_site_label_2
  _geom_bond_distance
  _geom_bond_site_symmetry_2
  _geom_bond_publ_flag
 Zr1 Zr1 3.5264(13) 11_655 ?
 Zr1 Zr1 3.5032(12) 10_556 ?
 Zr1 Zr2 3.4967(8) . ?
 Zr1 Zr3 3.5044(8) . ?
 Zr1 O1 2.250(5) . ?
 Zr1 O3 2.256(5) 15_545 ?
 Zr1 O5 2.072(3) . ?
 Zr1 O6 2.213(4) . ?
 Zr1 O7 2.074(4) . ?
 Zr1 O8 2.206(4) . ?
 Zr1 O9 2.285(8) . ?
 Zr1 O10 2.208(6) . ?
 Zr2 Zr1 3.4966(8) 10_556 ?
 Zr2 Zr1 3.4966(8) 11_655 ?
 Zr2 Zr1 3.4966(8) 4_655 ?
 Zr2 O2 2.177(5) 10_556 ?
 Zr2 O2 2.177(5) 11_655 ?
 Zr2 O2 2.177(5) 4_655 ?
 Zr2 O2 2.177(5) . ?
 Zr2 O5 2.105(7) . ?
 Zr2 O5 2.106(7) 10_556 ?
 Zr2 O6 2.196(8) . ?
 Zr2 O6 2.196(8) 11_655 ?
 Zr3 Zr1 3.5045(8) 4_655 ?
 Zr3 Zr1 3.5045(8) 11_655 ?
 Zr3 Zr1 3.5045(8) 10_556 ?
 Zr3 O4 2.214(5) 5_545 ?
 Zr3 O4 2.214(5) 8_545 ?
 Zr3 O4 2.214(5) 15_545 ?
 Zr3 O4 2.214(5) 14_546 ?
 Zr3 O7 2.069(8) . ?
 Zr3 O7 2.069(8) 11_655 ?
 Zr3 O8 2.305(8) 10_556 ?
 Zr3 O8 2.305(8) . ?
 O1 C1 1.288(9) . ?
 O2 C1 1.288(10) . ?
 O3 Zr1 2.256(5) 15 ?
 O3 C27 1.242(8) . ?
 O4 Zr3 2.215(5) 5_455 ?
 O4 C27 1.271(9) . ?
 O5 Zr1 2.072(3) 11_655 ?
 O6 Zr1 2.213(4) 10_556 ?
 O7 Zr1 2.074(4) 10_556 ?
 O8 Zr1 2.206(4) 11_655 ?
 C1 C2 1.475(11) . ?
 C2 C3 1.362(13) . ?
 C2 C7 1.340(13) . ?
 C3 C4 1.380(12) . ?
 C4 C5 1.390(14) . ?
 C5 C6 1.352(13) . ?
 C5 C8 1.494(11) . ?
 C6 C7 1.396(12) . ?
 C8 C9 1.49(2) . ?
 C8 C13 1.31(2) . ?
 C8 C9A 1.38(2) . ?
 C8 C13A 1.46(2) . ?
 C9 C10 1.42(2) . ?
 C10 C11 1.38(2) . ?
 C11 C12 1.30(2) . ?
 C11 C14 1.539(10) . ?
 C11 C10A 1.31(2) . ?
 C11 C12A 1.53(2) . ?
 C12 C13 1.37(2) . ?
 C14 C14 1.315(15) 10_557 ?
 C14 C15 1.498(10) . ?
 C15 C16 1.425(19) . ?
 C15 C20 1.392(18) . ?
 C15 C16A 1.37(2) . ?
 C15 C20A 1.40(2) . ?
 C16 C17 1.41(2) . ?
 C17 C18 1.49(2) . ?
 C18 C19 1.341(19) . ?
 C18 C21 1.491(10) . ?
 C18 C17A 1.35(3) . ?
 C18 C19A 1.348(19) . ?
 C19 C20 1.35(2) . ?
 C21 C22 1.305(12) . ?
 C21 C26 1.373(13) . ?
 C22 C23 1.389(12) . ?
 C23 C24 1.423(12) . ?
 C24 C25 1.375(11) . ?
 C24 C27 1.461(9) . ?
 C25 C26 1.398(12) . ?
 C9A C10A 1.38(2) . ?
 C12A C13A 1.39(2) . ?
 C16A C17A 1.47(2) . ?
 C19A C20A 1.39(2) . ?

loop_
  _geom_angle_atom_site_label_1
  _geom_angle_atom_site_label_2
  _geom_angle_atom_site_label_3
  _geom_angle
  _geom_angle_site_symmetry_1
  _geom_angle_site_symmetry_3
  _geom_angle_publ_flag
 Zr1 Zr1 Zr1 90.0 10_556 11_655 ?
 Zr1 Zr1 Zr3 60.013(11) 10_556 . ?
 Zr2 Zr1 Zr1 59.717(12) . 11_655 ?
 Zr2 Zr1 Zr1 59.936(11) . 10_556 ?
 Zr2 Zr1 Zr3 89.53(2) . . ?
 Zr3 Zr1 Zr1 59.794(12) . 11_655 ?
 O1 Zr1 Zr1 108.76(16) . 11_655 ?
 O1 Zr1 Zr1 109.28(15) . 10_556 ?
 O1 Zr1 Zr2 72.74(14) . . ?
 O1 Zr1 Zr3 162.27(14) . . ?
 O1 Zr1 O3 125.8(2) . 15_545 ?
 O1 Zr1 O9 77.3(2) . . ?
 O3 Zr1 Zr1 110.65(16) 15_545 11_655 ?
 O3 Zr1 Zr1 106.41(15) 15_545 10_556 ?
 O3 Zr1 Zr2 161.23(13) 15_545 . ?
 O3 Zr1 Zr3 71.92(13) 15_545 . ?
 O3 Zr1 O9 75.3(2) 15_545 . ?
 O5 Zr1 Zr1 31.69(15) . 11_655 ?
 O5 Zr1 Zr1 85.4(2) . 10_556 ?
 O5 Zr1 Zr2 33.5(2) . . ?
 O5 Zr1 Zr3 84.2(2) . . ?
 O5 Zr1 O1 80.7(2) . . ?
 O5 Zr1 O3 141.8(2) . 15_545 ?
 O5 Zr1 O6 70.8(3) . . ?
 O5 Zr1 O7 96.5(4) . . ?
 O5 Zr1 O8 68.6(2) . . ?
 O5 Zr1 O9 142.3(2) . . ?
 O5 Zr1 O10 92.0(3) . . ?
 O6 Zr1 Zr1 93.4(2) . 11_655 ?
 O6 Zr1 Zr1 37.67(14) . 10_556 ?
 O6 Zr1 Zr2 37.4(2) . . ?
 O6 Zr1 Zr3 93.60(19) . . ?
 O6 Zr1 O1 72.7(2) . . ?
 O6 Zr1 O3 138.2(2) . 15_545 ?
 O6 Zr1 O9 73.6(3) . . ?
 O7 Zr1 Zr1 32.37(17) . 10_556 ?
 O7 Zr1 Zr1 83.8(3) . 11_655 ?
 O7 Zr1 Zr2 83.8(2) . . ?
 O7 Zr1 Zr3 32.2(2) . . ?
 O7 Zr1 O1 141.2(2) . . ?
 O7 Zr1 O3 79.0(3) . 15_545 ?
 O7 Zr1 O6 69.9(2) . . ?
 O7 Zr1 O8 72.2(3) . . ?
 O7 Zr1 O9 82.5(3) . . ?
 O7 Zr1 O10 146.2(2) . . ?
 O8 Zr1 Zr1 96.2(2) . 10_556 ?
 O8 Zr1 Zr1 36.93(15) . 11_655 ?
 O8 Zr1 Zr2 93.81(18) . . ?
 O8 Zr1 Zr3 40.1(2) . . ?
 O8 Zr1 O1 138.3(2) . . ?
 O8 Zr1 O3 74.0(2) . 15_545 ?
 O8 Zr1 O6 119.4(3) . . ?
 O8 Zr1 O9 143.18(19) . . ?
 O8 Zr1 O10 80.8(3) . . ?
 O9 Zr1 Zr1 163.6(2) . 11_655 ?
 O9 Zr1 Zr1 73.6(2) . 10_556 ?
 O9 Zr1 Zr2 109.80(18) . . ?
 O9 Zr1 Zr3 110.23(18) . . ?
 O10 Zr1 Zr1 86.7(2) . 11_655 ?
 O10 Zr1 Zr1 176.6(2) . 10_556 ?
 O10 Zr1 Zr2 118.59(17) . . ?
 O10 Zr1 Zr3 117.51(17) . . ?
 O10 Zr1 O1 72.5(2) . . ?
 O10 Zr1 O3 74.3(2) . 15_545 ?
 O10 Zr1 O6 143.2(2) . . ?
 O10 Zr1 O9 109.7(3) . . ?
 Zr1 Zr2 Zr1 60.56(2) 11_655 . ?
 Zr1 Zr2 Zr1 90.60(3) 4_655 . ?
 Zr1 Zr2 Zr1 60.12(2) 10_556 . ?
 Zr1 Zr2 Zr1 90.60(3) 10_556 11_655 ?
 Zr1 Zr2 Zr1 60.13(2) 4_655 11_655 ?
 Zr1 Zr2 Zr1 60.56(2) 10_556 4_655 ?
 O2 Zr2 Zr1 75.56(13) 10_556 10_556 ?
 O2 Zr2 Zr1 166.10(13) 10_556 11_655 ?
 O2 Zr2 Zr1 111.83(15) 10_556 . ?
 O2 Zr2 Zr1 110.45(14) 4_655 10_556 ?
 O2 Zr2 Zr1 110.45(14) . 11_655 ?
 O2 Zr2 Zr1 111.83(15) . 10_556 ?
 O2 Zr2 Zr1 75.56(13) . . ?
 O2 Zr2 Zr1 111.83(15) 11_655 4_655 ?
 O2 Zr2 Zr1 166.10(13) 11_655 10_556 ?
 O2 Zr2 Zr1 110.45(14) 10_556 4_655 ?
 O2 Zr2 Zr1 110.45(14) 11_655 . ?
 O2 Zr2 Zr1 75.56(13) 4_655 4_655 ?
 O2 Zr2 Zr1 166.10(13) 4_655 . ?
 O2 Zr2 Zr1 166.10(13) . 4_655 ?
 O2 Zr2 Zr1 75.56(13) 11_655 11_655 ?
 O2 Zr2 Zr1 111.83(15) 4_655 11_655 ?
 O2 Zr2 O2 72.9(3) 10_556 4_655 ?
 O2 Zr2 O2 76.6(3) 11_655 4_655 ?
 O2 Zr2 O2 118.3(3) 4_655 . ?
 O2 Zr2 O2 118.3(3) 11_655 10_556 ?
 O2 Zr2 O2 72.9(3) 11_655 . ?
 O2 Zr2 O2 76.6(3) 10_556 . ?
 O2 Zr2 O6 75.4(2) 11_655 11_655 ?
 O2 Zr2 O6 75.4(2) 10_556 . ?
 O2 Zr2 O6 75.4(2) . . ?
 O2 Zr2 O6 140.51(16) 10_556 11_655 ?
 O2 Zr2 O6 140.51(16) 4_655 . ?
 O2 Zr2 O6 75.4(2) 4_655 11_655 ?
 O2 Zr2 O6 140.51(16) . 11_655 ?
 O2 Zr2 O6 140.51(16) 11_655 . ?
 O5 Zr2 Zr1 85.1(2) . 4_655 ?
 O5 Zr2 Zr1 32.87(9) 10_556 10_556 ?
 O5 Zr2 Zr1 85.1(2) 10_556 . ?
 O5 Zr2 Zr1 32.87(9) 10_556 4_655 ?
 O5 Zr2 Zr1 32.88(9) . . ?
 O5 Zr2 Zr1 32.88(9) . 11_655 ?
 O5 Zr2 Zr1 85.1(2) . 10_556 ?
 O5 Zr2 Zr1 85.1(2) 10_556 11_655 ?
 O5 Zr2 O2 82.5(2) 10_556 10_556 ?
 O5 Zr2 O2 143.55(15) 10_556 11_655 ?
 O5 Zr2 O2 82.5(2) 10_556 4_655 ?
 O5 Zr2 O2 82.5(2) . . ?
 O5 Zr2 O2 143.55(15) . 4_655 ?
 O5 Zr2 O2 143.55(15) 10_556 . ?
 O5 Zr2 O2 143.55(15) . 10_556 ?
 O5 Zr2 O2 82.5(2) . 11_655 ?
 O5 Zr2 O5 97.8(5) . 10_556 ?
 O5 Zr2 O6 70.54(16) 10_556 11_655 ?
 O5 Zr2 O6 70.54(16) 10_556 . ?
 O5 Zr2 O6 70.54(16) . 11_655 ?
 O5 Zr2 O6 70.54(16) . . ?
 O6 Zr2 Zr1 37.70(13) 11_655 11_655 ?
 O6 Zr2 Zr1 37.70(12) . 10_556 ?
 O6 Zr2 Zr1 94.48(19) . 11_655 ?
 O6 Zr2 Zr1 94.48(19) . 4_655 ?
 O6 Zr2 Zr1 94.48(19) 11_655 10_556 ?
 O6 Zr2 Zr1 37.70(12) . . ?
 O6 Zr2 Zr1 37.70(12) 11_655 4_655 ?
 O6 Zr2 Zr1 94.48(19) 11_655 . ?
 O6 Zr2 O6 119.1(4) 11_655 . ?
 Zr1 Zr3 Zr1 60.41(2) . 11_655 ?
 Zr1 Zr3 Zr1 60.41(2) 4_655 10_556 ?
 Zr1 Zr3 Zr1 90.34(3) . 4_655 ?
 Zr1 Zr3 Zr1 59.97(2) 11_655 4_655 ?
 Zr1 Zr3 Zr1 90.34(3) 11_655 10_556 ?
 Zr1 Zr3 Zr1 59.98(2) . 10_556 ?
 O4 Zr3 Zr1 111.30(12) 15_545 11_655 ?
 O4 Zr3 Zr1 165.51(12) 8_545 11_655 ?
 O4 Zr3 Zr1 75.18(11) 5_545 11_655 ?
 O4 Zr3 Zr1 110.44(12) 14_546 11_655 ?
 O4 Zr3 Zr1 165.51(12) 5_545 10_556 ?
 O4 Zr3 Zr1 111.30(12) 14_546 10_556 ?
 O4 Zr3 Zr1 110.44(12) 8_545 . ?
 O4 Zr3 Zr1 111.30(12) 8_545 4_655 ?
 O4 Zr3 Zr1 75.18(11) 8_545 10_556 ?
 O4 Zr3 Zr1 110.44(12) 5_545 4_655 ?
 O4 Zr3 Zr1 110.44(12) 15_545 10_556 ?
 O4 Zr3 Zr1 165.51(12) 15_545 4_655 ?
 O4 Zr3 Zr1 75.18(11) 14_546 4_655 ?
 O4 Zr3 Zr1 75.18(11) 15_545 . ?
 O4 Zr3 Zr1 165.51(12) 14_546 . ?
 O4 Zr3 Zr1 111.29(12) 5_545 . ?
 O4 Zr3 O4 75.9(2) 8_545 14_546 ?
 O4 Zr3 O4 74.5(2) 8_545 15_545 ?
 O4 Zr3 O4 119.3(2) 8_545 5_545 ?
 O4 Zr3 O4 74.5(2) 5_545 14_546 ?
 O4 Zr3 O4 119.3(2) 15_545 14_546 ?
 O4 Zr3 O4 75.9(2) 5_545 15_545 ?
 O4 Zr3 O8 74.56(19) 14_546 10_556 ?
 O4 Zr3 O8 141.05(13) 14_546 . ?
 O4 Zr3 O8 141.05(13) 5_545 10_556 ?
 O4 Zr3 O8 141.05(13) 8_545 . ?
 O4 Zr3 O8 74.56(19) 8_545 10_556 ?
 O4 Zr3 O8 141.05(13) 15_545 10_556 ?
 O4 Zr3 O8 74.56(19) 15_545 . ?
 O4 Zr3 O8 74.56(19) 5_545 . ?
 O7 Zr3 Zr1 84.4(2) . 11_655 ?
 O7 Zr3 Zr1 84.4(2) 11_655 . ?
 O7 Zr3 Zr1 32.28(9) 11_655 11_655 ?
 O7 Zr3 Zr1 84.4(2) 11_655 10_556 ?
 O7 Zr3 Zr1 32.27(9) . . ?
 O7 Zr3 Zr1 32.27(9) . 10_556 ?
 O7 Zr3 Zr1 32.28(9) 11_655 4_655 ?
 O7 Zr3 Zr1 84.4(2) . 4_655 ?
 O7 Zr3 O4 142.68(12) 11_655 15_545 ?
 O7 Zr3 O4 83.1(2) . 15_545 ?
 O7 Zr3 O4 142.68(12) . 5_545 ?
 O7 Zr3 O4 83.1(2) 11_655 14_546 ?
 O7 Zr3 O4 142.68(12) 11_655 8_545 ?
 O7 Zr3 O4 142.68(12) . 14_546 ?
 O7 Zr3 O4 83.1(2) 11_655 5_545 ?
 O7 Zr3 O4 83.1(2) . 8_545 ?
 O7 Zr3 O7 96.1(5) 11_655 . ?
 O7 Zr3 O8 70.22(16) . . ?
 O7 Zr3 O8 70.22(16) 11_655 10_556 ?
 O7 Zr3 O8 70.22(16) 11_655 . ?
 O7 Zr3 O8 70.22(16) . 10_556 ?
 O8 Zr3 Zr1 38.01(12) 10_556 4_655 ?
 O8 Zr3 Zr1 94.25(18) 10_556 . ?
 O8 Zr3 Zr1 38.01(12) . 11_655 ?
 O8 Zr3 Zr1 94.25(18) 10_556 11_655 ?
 O8 Zr3 Zr1 38.01(12) . . ?
 O8 Zr3 Zr1 94.25(18) . 10_556 ?
 O8 Zr3 Zr1 94.25(18) . 4_655 ?
 O8 Zr3 Zr1 38.01(12) 10_556 10_556 ?
 O8 Zr3 O8 119.2(4) . 10_556 ?
 C1 O1 Zr1 133.5(5) . . ?
 C1 O2 Zr2 132.7(4) . . ?
 C27 O3 Zr1 134.8(5) . 15 ?
 C27 O4 Zr3 131.4(4) . 5_455 ?
 Zr1 O5 Zr1 116.6(3) 11_655 . ?
 Zr1 O5 Zr2 113.6(2) . . ?
 Zr1 O5 Zr2 113.6(2) 11_655 . ?
 Zr1 O6 Zr1 104.7(3) 10_556 . ?
 Zr2 O6 Zr1 104.9(3) . . ?
 Zr2 O6 Zr1 104.9(3) . 10_556 ?
 Zr1 O7 Zr1 115.3(3) . 10_556 ?
 Zr3 O7 Zr1 115.5(3) . . ?
 Zr3 O7 Zr1 115.5(3) . 10_556 ?
 Zr1 O8 Zr1 106.1(3) . 11_655 ?
 Zr1 O8 Zr3 101.9(3) 11_655 . ?
 Zr1 O8 Zr3 101.9(3) . . ?
 O1 C1 O2 125.2(7) . . ?
 O1 C1 C2 115.8(8) . . ?
 O2 C1 C2 118.9(6) . . ?
 C3 C2 C1 119.7(9) . . ?
 C7 C2 C1 123.1(8) . . ?
 C7 C2 C3 117.2(8) . . ?
 C2 C3 C4 123.4(10) . . ?
 C3 C4 C5 117.6(10) . . ?
 C4 C5 C8 122.0(9) . . ?
 C6 C5 C4 118.6(8) . . ?
 C6 C5 C8 119.4(10) . . ?
 C5 C6 C7 121.2(10) . . ?
 C2 C7 C6 121.0(9) . . ?
 C9 C8 C5 117.7(11) . . ?
 C13 C8 C5 120.9(13) . . ?
 C13 C8 C9 121.4(13) . . ?
 C9A C8 C5 123.4(11) . . ?
 C9A C8 C13A 117.2(12) . . ?
 C13A C8 C5 119.3(10) . . ?
 C10 C9 C8 114.4(18) . . ?
 C11 C10 C9 123.0(17) . . ?
 C10 C11 C14 122.8(10) . . ?
 C12 C11 C10 114.4(12) . . ?
 C12 C11 C14 122.8(11) . . ?
 C10A C11 C14 123.9(9) . . ?
 C10A C11 C12A 121.4(11) . . ?
 C12A C11 C14 112.9(11) . . ?
 C11 C12 C13 129.6(19) . . ?
 C8 C13 C12 116(2) . . ?
 C14 C14 C11 122.8(4) 10_557 . ?
 C14 C14 C15 123.4(4) 10_557 . ?
 C15 C14 C11 113.5(6) . . ?
 C16 C15 C14 119.3(9) . . ?
 C20 C15 C14 121.6(9) . . ?
 C20 C15 C16 118.9(10) . . ?
 C16A C15 C14 118.7(10) . . ?
 C16A C15 C20A 120.8(12) . . ?
 C20A C15 C14 119.3(11) . . ?
 C17 C16 C15 120.6(15) . . ?
 C16 C17 C18 117.1(15) . . ?
 C19 C18 C17 118.3(11) . . ?
 C19 C18 C21 125.1(10) . . ?
 C21 C18 C17 116.6(9) . . ?
 C17A C18 C21 118.8(10) . . ?
 C19A C18 C21 124.8(11) . . ?
 C19A C18 C17A 116.0(12) . . ?
 C18 C19 C20 124.0(15) . . ?
 C19 C20 C15 120.6(14) . . ?
 C22 C21 C18 124.1(9) . . ?
 C22 C21 C26 116.5(8) . . ?
 C26 C21 C18 119.3(8) . . ?
 C21 C22 C23 126.0(10) . . ?
 C22 C23 C24 117.3(9) . . ?
 C23 C24 C27 119.0(7) . . ?
 C25 C24 C23 117.8(7) . . ?
 C25 C24 C27 123.1(8) . . ?
 C24 C25 C26 119.9(9) . . ?
 C21 C26 C25 122.2(9) . . ?
 O3 C27 O4 126.0(6) . . ?
 O3 C27 C24 119.5(7) . . ?
 O4 C27 C24 114.5(6) . . ?
 C10A C9A C8 121.9(18) . . ?
 C11 C10A C9A 121.5(15) . . ?
 C13A C12A C11 112.7(19) . . ?
 C12A C13A C8 123.3(16) . . ?
 C15 C16A C17A 115.1(16) . . ?
 C18 C17A C16A 123.9(18) . . ?
 C18 C19A C20A 124.1(18) . . ?
 C19A C20A C15 118.1(17) . . ?

_shelx_fab_file
;
 0 0 2 -737.72 0.00
 0 0 4 266.62 0.00
 0 0 6 -140.35 0.00
 0 0 8 43.76 0.00
 0 0 10 -32.83 0.00
 0 0 12 -12.16 0.00
 0 0 14 -3.69 0.00
 0 0 16 -11.36 0.00
 0 0 18 -5.96 0.00
 0 2 1 146.74 0.00
 0 2 2 -94.47 0.00
 0 2 3 4.63 0.00
 0 2 4 27.58 0.00
 0 2 5 30.79 0.00
 0 2 6 48.79 0.00
 0 2 7 -17.88 0.00
 0 2 8 0.68 0.00
 0 2 9 6.16 0.00
 0 2 10 0.07 0.00
 0 2 11 6.11 0.00
 0 2 12 7.02 0.00
 0 2 13 -8.11 0.00
 0 2 14 1.37 0.00
 0 2 15 2.57 0.00
 0 2 16 3.06 0.00
 0 2 17 0.04 0.00
 0 2 18 3.58 0.00
 0 2 19 -1.30 0.00
 0 4 1 70.97 0.00
 0 4 2 360.16 0.00
 0 4 3 -0.77 0.00
 0 4 4 -125.95 0.00
 0 4 5 -1.64 0.00
 0 4 6 35.52 0.00
 0 4 7 -4.71 0.00
 0 4 8 -48.56 0.00
 0 4 9 -8.45 0.00
 0 4 10 19.41 0.00
 0 4 11 -1.08 0.00
 0 4 12 0.66 0.00
 0 4 13 -1.18 0.00
 0 4 14 -16.06 0.00
 0 4 15 3.33 0.00
 0 4 16 -4.26 0.00
 0 4 17 7.30 0.00
 0 4 18 2.96 0.00
 0 4 19 -1.85 0.00
 0 6 0 194.51 0.00
 0 6 1 -37.98 0.00
 0 6 2 -206.90 0.00
 0 6 3 44.69 0.00
 0 6 4 4.08 0.00
 0 6 5 -17.89 0.00
 0 6 6 26.66 0.00
 0 6 7 -12.35 0.00
 0 6 8 -0.90 0.00
 0 6 9 -4.12 0.00
 0 6 10 -3.82 0.00
 0 6 11 9.44 0.00
 0 6 12 -8.52 0.00
 0 6 13 1.14 0.00
 0 6 14 -4.02 0.00
 0 6 15 0.71 0.00
 0 6 16 2.46 0.00
 0 6 17 -11.36 0.00
 0 6 18 1.28 0.00
 0 6 19 -7.30 0.00
 0 8 0 -94.72 0.00
 0 8 1 -67.73 0.00
 0 8 2 26.46 0.00
 0 8 3 31.03 0.00
 0 8 4 -55.07 0.00
 0 8 5 39.71 0.00
 0 8 6 -17.80 0.00
 0 8 7 33.59 0.00
 0 8 8 30.35 0.00
 0 8 9 0.05 0.00
 0 8 10 1.08 0.00
 0 8 11 -0.49 0.00
 0 8 12 0.54 0.00
 0 8 13 0.45 0.00
 0 8 14 4.30 0.00
 0 8 15 -2.32 0.00
 0 8 16 -3.64 0.00
 0 8 17 17.40 0.00
 0 8 18 7.14 0.00
 0 8 19 -2.66 0.00
 0 10 0 -30.99 0.00
 0 10 1 -9.08 0.00
 0 10 2 71.70 0.00
 0 10 3 2.03 0.00
 0 10 4 -95.12 0.00
 0 10 5 0.74 0.00
 0 10 6 62.14 0.00
 0 10 7 -26.39 0.00
 0 10 8 -61.97 0.00
 0 10 9 -4.87 0.00
 0 10 10 4.69 0.00
 0 10 11 2.45 0.00
 0 10 12 -8.25 0.00
 0 10 13 -0.64 0.00
 0 10 14 -7.76 0.00
 0 10 15 -6.50 0.00
 0 10 16 -7.89 0.00
 0 10 17 15.56 0.00
 0 10 18 4.53 0.00
 0 10 19 -5.65 0.00
 0 12 0 -64.10 0.00
 0 12 1 69.59 0.00
 0 12 2 6.10 0.00
 0 12 3 -38.12 0.00
 0 12 4 69.38 0.00
 0 12 5 45.53 0.00
 0 12 6 -49.70 0.00
 0 12 7 -5.77 0.00
 0 12 8 34.59 0.00
 0 12 9 24.04 0.00
 0 12 10 -2.45 0.00
 0 12 11 7.83 0.00
 0 12 12 9.65 0.00
 0 12 13 -12.18 0.00
 0 12 14 -10.27 0.00
 0 12 15 -5.69 0.00
 0 12 16 7.47 0.00
 0 12 17 -9.18 0.00
 0 12 18 3.87 0.00
 0 12 19 8.55 0.00
 0 14 0 -2.16 0.00
 0 14 1 -3.07 0.00
 0 14 2 15.09 0.00
 0 14 3 -5.50 0.00
 0 14 4 -14.69 0.00
 0 14 5 -1.77 0.00
 0 14 6 -41.96 0.00
 0 14 7 9.52 0.00
 0 14 8 14.33 0.00
 0 14 9 -10.11 0.00
 0 14 10 -16.14 0.00
 0 14 11 0.56 0.00
 0 14 12 6.11 0.00
 0 14 13 4.02 0.00
 0 14 14 4.05 0.00
 0 14 15 10.77 0.00
 0 14 16 0.88 0.00
 0 14 17 -1.01 0.00
 0 14 18 -3.80 0.00
 0 16 0 10.54 0.00
 0 16 1 -14.44 0.00
 0 16 2 -4.04 0.00
 0 16 3 -8.59 0.00
 0 16 4 16.20 0.00
 0 16 5 34.74 0.00
 0 16 6 46.08 0.00
 0 16 7 2.45 0.00
 0 16 8 -30.91 0.00
 0 16 9 -11.99 0.00
 0 16 10 20.30 0.00
 0 16 11 1.70 0.00
 0 16 12 -35.81 0.00
 0 16 13 -5.15 0.00
 0 16 14 0.30 0.00
 0 16 15 -13.42 0.00
 0 16 16 -15.47 0.00
 0 16 17 -8.28 0.00
 0 16 18 -1.05 0.00
 0 18 0 -6.41 0.00
 0 18 1 -3.12 0.00
 0 18 2 6.95 0.00
 0 18 3 -6.87 0.00
 0 18 4 -24.31 0.00
 0 18 5 -0.18 0.00
 0 18 6 2.85 0.00
 0 18 7 -3.99 0.00
 0 18 8 15.90 0.00
 0 18 9 -12.27 0.00
 0 18 10 -2.90 0.00
 0 18 11 17.86 0.00
 0 18 12 5.42 0.00
 0 18 13 -1.14 0.00
 0 18 14 10.61 0.00
 0 18 15 16.59 0.00
 0 18 16 -8.45 0.00
 0 18 17 11.56 0.00
 0 18 18 9.45 0.00
 0 20 0 -0.01 0.00
 0 20 1 -49.81 0.00
 0 20 2 -4.31 0.00
 0 20 3 44.55 0.00
 0 20 4 2.30 0.00
 0 20 5 -3.85 0.00
 0 20 6 -7.18 0.00
 0 20 7 30.31 0.00
 0 20 8 -2.26 0.00
 0 20 9 -23.44 0.00
 0 20 10 -3.93 0.00
 0 20 11 3.44 0.00
 0 20 12 3.51 0.00
 0 20 13 -6.70 0.00
 0 20 14 -20.06 0.00
 0 20 15 -10.50 0.00
 0 20 16 -5.46 0.00
 0 20 17 -12.50 0.00
 0 20 18 -9.57 0.00
 0 22 0 12.56 0.00
 0 22 1 -34.16 0.00
 0 22 2 12.64 0.00
 0 22 3 -4.62 0.00
 0 22 4 -19.62 0.00
 0 22 5 -13.09 0.00
 0 22 6 10.84 0.00
 0 22 7 -7.96 0.00
 0 22 8 -23.65 0.00
 0 22 9 11.63 0.00
 0 22 10 39.17 0.00
 0 22 11 -7.55 0.00
 0 22 12 -13.98 0.00
 0 22 13 14.43 0.00
 0 22 14 3.34 0.00
 0 22 15 2.46 0.00
 0 22 16 4.75 0.00
 0 22 17 -7.08 0.00
 0 24 0 -23.53 0.00
 0 24 1 18.70 0.00
 0 24 2 2.87 0.00
 0 24 3 -9.99 0.00
 0 24 4 -8.29 0.00
 0 24 5 19.81 0.00
 0 24 6 6.26 0.00
 0 24 7 -6.65 0.00
 0 24 8 10.18 0.00
 0 24 9 9.24 0.00
 0 24 10 -23.81 0.00
 0 24 11 -11.59 0.00
 0 24 12 6.67 0.00
 0 24 13 4.14 0.00
 0 24 14 5.89 0.00
 0 24 15 -0.56 0.00
 0 24 16 -5.85 0.00
 0 26 0 9.46 0.00
 0 26 1 0.99 0.00
 0 26 2 -6.99 0.00
 0 26 3 -5.07 0.00
 0 26 4 4.36 0.00
 0 26 5 -7.05 0.00
 0 26 6 -2.01 0.00
 0 26 7 2.49 0.00
 0 26 8 6.02 0.00
 0 26 9 -9.10 0.00
 0 26 10 -6.61 0.00
 0 26 11 2.73 0.00
 0 26 12 16.12 0.00
 0 26 13 -1.91 0.00
 0 26 14 -2.98 0.00
 0 26 15 -7.53 0.00
 0 26 16 4.97 0.00
 0 28 0 -6.31 0.00
 0 28 1 -5.20 0.00
 0 28 2 -3.89 0.00
 0 28 3 3.92 0.00
 0 28 4 -6.03 0.00
 0 28 5 -0.27 0.00
 0 28 6 1.55 0.00
 0 28 7 -4.48 0.00
 0 28 8 -3.86 0.00
 0 28 9 1.01 0.00
 0 28 10 5.73 0.00
 0 28 11 4.97 0.00
 0 28 12 -3.62 0.00
 0 28 13 3.86 0.00
 0 28 14 2.21 0.00
 0 28 15 -6.63 0.00
 0 28 16 0.99 0.00
 0 30 0 -4.38 0.00
 0 30 1 -0.20 0.00
 0 30 2 10.46 0.00
 0 30 3 1.69 0.00
 0 30 4 7.27 0.00
 0 30 5 5.84 0.00
 0 30 6 2.27 0.00
 0 30 7 -0.25 0.00
 0 30 8 6.90 0.00
 0 30 9 -2.06 0.00
 0 30 10 7.77 0.00
 0 30 11 -14.84 0.00
 0 30 12 -7.29 0.00
 0 30 13 -1.62 0.00
 0 30 14 -2.85 0.00
 0 30 15 13.87 0.00
 0 32 0 -0.98 0.00
 0 32 1 4.16 0.00
 0 32 2 -17.87 0.00
 0 32 3 -9.29 0.00
 0 32 4 8.15 0.00
 0 32 5 -4.98 0.00
 0 32 6 -5.93 0.00
 0 32 7 5.58 0.00
 0 32 8 6.02 0.00
 0 32 9 -7.02 0.00
 0 32 10 -0.89 0.00
 0 32 11 2.24 0.00
 0 32 12 9.47 0.00
 0 32 13 1.47 0.00
 0 32 14 -2.26 0.00
 0 34 0 6.55 0.00
 0 34 1 6.64 0.00
 0 34 2 5.61 0.00
 0 34 3 1.72 0.00
 0 34 4 7.95 0.00
 0 34 5 -4.87 0.00
 0 34 6 0.19 0.00
 0 34 7 3.91 0.00
 0 34 8 1.59 0.00
 0 34 9 -4.93 0.00
 0 34 10 -0.58 0.00
 0 34 11 4.17 0.00
 0 34 12 -6.54 0.00
 0 34 13 2.04 0.00
 0 34 14 -23.43 0.00
 0 36 0 -8.72 0.00
 0 36 1 10.01 0.00
 0 36 2 -2.14 0.00
 0 36 3 -5.54 0.00
 0 36 4 -6.27 0.00
 0 36 5 -6.29 0.00
 0 36 6 2.30 0.00
 0 36 7 4.90 0.00
 0 36 8 2.66 0.00
 0 36 9 2.24 0.00
 0 36 10 4.78 0.00
 0 36 11 -3.72 0.00
 0 36 12 3.23 0.00
 0 36 13 -5.31 0.00
 0 38 0 -11.63 0.00
 0 38 1 1.05 0.00
 0 38 2 4.07 0.00
 0 38 3 -1.91 0.00
 0 38 4 -0.11 0.00
 0 38 5 -12.32 0.00
 0 38 6 3.80 0.00
 0 38 7 6.86 0.00
 0 38 8 -4.76 0.00
 0 38 9 6.20 0.00
 0 38 10 7.91 0.00
 0 38 11 0.05 0.00
 0 40 0 4.98 0.00
 0 40 1 -14.15 0.00
 0 40 2 5.51 0.00
 0 40 3 16.32 0.00
 0 40 4 -7.86 0.00
 0 40 5 -4.23 0.00
 0 40 6 -2.45 0.00
 0 40 7 -6.29 0.00
 0 40 8 -6.94 0.00
 0 40 9 0.23 0.00
 0 40 10 0.80 0.00
 0 42 0 -3.61 0.00
 0 42 1 -7.64 0.00
 0 42 2 -4.95 0.00
 0 42 3 20.83 0.00
 0 42 4 4.79 0.00
 0 42 5 -32.63 0.00
 0 42 6 -1.14 0.00
 0 42 7 11.47 0.00
 0 42 8 4.75 0.00
 0 42 9 -1.53 0.00
 0 44 0 -0.69 0.00
 0 44 1 -7.17 0.00
 0 44 2 4.85 0.00
 0 44 3 4.68 0.00
 0 44 4 4.10 0.00
 0 44 5 -1.13 0.00
 0 44 6 0.96 0.00
 0 44 7 -0.86 0.00
 0 44 8 -0.28 0.00
 0 46 0 -4.59 0.00
 0 46 1 -2.58 0.00
 0 46 2 0.24 0.00
 0 46 3 -1.46 0.00
 0 46 4 -3.47 0.00
 0 46 5 5.65 0.00
 0 46 6 -2.52 0.00
 0 48 0 16.09 0.00
 0 48 1 7.53 0.00
 0 48 2 -9.32 0.00
 1 1 1 -375.36 0.00
 1 1 2 10.97 0.00
 1 1 3 -156.74 0.00
 1 1 4 31.84 0.00
 1 1 5 23.09 0.00
 1 1 6 -8.24 0.00
 1 1 7 -25.07 0.00
 1 1 8 1.25 0.00
 1 1 9 -7.13 0.00
 1 1 10 5.86 0.00
 1 1 11 -23.87 0.00
 1 1 12 2.37 0.00
 1 1 13 3.72 0.00
 1 1 14 -15.71 0.00
 1 1 15 -4.57 0.00
 1 1 16 7.69 0.00
 1 1 17 -2.31 0.00
 1 1 18 -5.24 0.00
 1 1 19 5.54 0.00
 1 3 0 62.54 0.00
 1 3 1 159.55 0.00
 1 3 2 69.05 0.00
 1 3 3 -16.94 0.00
 1 3 4 -11.94 0.00
 1 3 5 97.29 0.00
 1 3 6 5.32 0.00
 1 3 7 -22.55 0.00
 1 3 8 -6.06 0.00
 1 3 9 11.73 0.00
 1 3 10 9.94 0.00
 1 3 11 -4.44 0.00
 1 3 12 -17.06 0.00
 1 3 13 11.43 0.00
 1 3 14 -4.37 0.00
 1 3 15 -7.23 0.00
 1 3 16 4.41 0.00
 1 3 17 -5.75 0.00
 1 3 18 -1.51 0.00
 1 3 19 -4.20 0.00
 1 5 0 19.44 0.00
 1 5 1 276.01 0.00
 1 5 2 12.55 0.00
 1 5 3 -113.55 0.00
 1 5 4 -23.36 0.00
 1 5 5 -28.84 0.00
 1 5 6 -21.99 0.00
 1 5 7 17.98 0.00
 1 5 8 -0.64 0.00
 1 5 9 8.53 0.00
 1 5 10 4.90 0.00
 1 5 11 0.65 0.00
 1 5 12 -1.51 0.00
 1 5 13 -3.06 0.00
 1 5 14 4.16 0.00
 1 5 15 2.90 0.00
 1 5 16 6.21 0.00
 1 5 17 -1.15 0.00
 1 5 18 -3.92 0.00
 1 5 19 7.58 0.00
 1 7 0 -25.61 0.00
 1 7 1 66.38 0.00
 1 7 2 23.12 0.00
 1 7 3 37.94 0.00
 1 7 4 -78.85 0.00
 1 7 5 -25.35 0.00
 1 7 6 5.67 0.00
 1 7 7 -17.31 0.00
 1 7 8 22.47 0.00
 1 7 9 -14.37 0.00
 1 7 10 -1.01 0.00
 1 7 11 -7.17 0.00
 1 7 12 -1.79 0.00
 1 7 13 -1.49 0.00
 1 7 14 -8.28 0.00
 1 7 15 0.07 0.00
 1 7 16 -5.91 0.00
 1 7 17 -8.31 0.00
 1 7 18 8.06 0.00
 1 7 19 -2.10 0.00
 1 9 0 34.97 0.00
 1 9 1 32.72 0.00
 1 9 2 42.34 0.00
 1 9 3 15.58 0.00
 1 9 4 29.21 0.00
 1 9 5 2.51 0.00
 1 9 6 6.31 0.00
 1 9 7 52.68 0.00
 1 9 8 -21.51 0.00
 1 9 9 -15.52 0.00
 1 9 10 -4.20 0.00
 1 9 11 11.54 0.00
 1 9 12 -2.99 0.00
 1 9 13 6.67 0.00
 1 9 14 6.29 0.00
 1 9 15 3.40 0.00
 1 9 16 -1.60 0.00
 1 9 17 3.91 0.00
 1 9 18 5.38 0.00
 1 9 19 -4.69 0.00
 1 11 0 -43.08 0.00
 1 11 1 -3.69 0.00
 1 11 2 75.63 0.00
 1 11 3 13.73 0.00
 1 11 4 8.01 0.00
 1 11 5 -24.30 0.00
 1 11 6 -22.30 0.00
 1 11 7 9.64 0.00
 1 11 8 -11.80 0.00
 1 11 9 -19.40 0.00
 1 11 10 12.29 0.00
 1 11 11 10.24 0.00
 1 11 12 -0.63 0.00
 1 11 13 -0.81 0.00
 1 11 14 -0.14 0.00
 1 11 15 -1.98 0.00
 1 11 16 2.70 0.00
 1 11 17 16.35 0.00
 1 11 18 4.57 0.00
 1 11 19 0.84 0.00
 1 13 0 28.12 0.00
 1 13 1 -5.16 0.00
 1 13 2 39.69 0.00
 1 13 3 47.98 0.00
 1 13 4 6.19 0.00
 1 13 5 -1.21 0.00
 1 13 6 10.96 0.00
 1 13 7 14.89 0.00
 1 13 8 -1.75 0.00
 1 13 9 5.77 0.00
 1 13 10 -6.15 0.00
 1 13 11 -11.66 0.00
 1 13 12 -11.21 0.00
 1 13 13 3.89 0.00
 1 13 14 -6.98 0.00
 1 13 15 -5.61 0.00
 1 13 16 -2.63 0.00
 1 13 17 11.65 0.00
 1 13 18 -7.41 0.00
 1 13 19 4.42 0.00
 1 15 0 18.88 0.00
 1 15 1 9.25 0.00
 1 15 2 6.22 0.00
 1 15 3 -19.43 0.00
 1 15 4 11.52 0.00
 1 15 5 -8.52 0.00
 1 15 6 33.93 0.00
 1 15 7 24.58 0.00
 1 15 8 -14.44 0.00
 1 15 9 18.72 0.00
 1 15 10 13.08 0.00
 1 15 11 -6.30 0.00
 1 15 12 8.07 0.00
 1 15 13 7.66 0.00
 1 15 14 -1.60 0.00
 1 15 15 1.43 0.00
 1 15 16 -6.01 0.00
 1 15 17 -0.74 0.00
 1 15 18 0.87 0.00
 1 17 0 -43.07 0.00
 1 17 1 15.55 0.00
 1 17 2 -5.20 0.00
 1 17 3 29.50 0.00
 1 17 4 -5.50 0.00
 1 17 5 -4.82 0.00
 1 17 6 12.02 0.00
 1 17 7 -20.40 0.00
 1 17 8 -21.88 0.00
 1 17 9 9.75 0.00
 1 17 10 2.94 0.00
 1 17 11 -14.29 0.00
 1 17 12 7.91 0.00
 1 17 13 -14.79 0.00
 1 17 14 -14.57 0.00
 1 17 15 15.07 0.00
 1 17 16 -0.62 0.00
 1 17 17 -4.58 0.00
 1 17 18 5.95 0.00
 1 19 0 12.59 0.00
 1 19 1 -12.67 0.00
 1 19 2 -3.37 0.00
 1 19 3 15.67 0.00
 1 19 4 -1.40 0.00
 1 19 5 1.72 0.00
 1 19 6 25.83 0.00
 1 19 7 0.17 0.00
 1 19 8 2.75 0.00
 1 19 9 -13.63 0.00
 1 19 10 4.89 0.00
 1 19 11 5.95 0.00
 1 19 12 2.84 0.00
 1 19 13 2.84 0.00
 1 19 14 0.17 0.00
 1 19 15 -0.81 0.00
 1 19 16 -0.30 0.00
 1 19 17 3.31 0.00
 1 19 18 -12.00 0.00
 1 21 0 12.91 0.00
 1 21 1 -4.45 0.00
 1 21 2 -5.95 0.00
 1 21 3 25.84 0.00
 1 21 4 11.78 0.00
 1 21 5 -20.40 0.00
 1 21 6 -8.09 0.00
 1 21 7 14.01 0.00
 1 21 8 -4.52 0.00
 1 21 9 -22.41 0.00
 1 21 10 -16.09 0.00
 1 21 11 4.34 0.00
 1 21 12 -3.32 0.00
 1 21 13 -16.57 0.00
 1 21 14 3.00 0.00
 1 21 15 -7.88 0.00
 1 21 16 9.80 0.00
 1 21 17 -5.59 0.00
 1 23 0 6.91 0.00
 1 23 1 -4.01 0.00
 1 23 2 -22.05 0.00
 1 23 3 3.06 0.00
 1 23 4 3.66 0.00
 1 23 5 -2.75 0.00
 1 23 6 1.13 0.00
 1 23 7 3.46 0.00
 1 23 8 10.50 0.00
 1 23 9 26.86 0.00
 1 23 10 -3.66 0.00
 1 23 11 -34.73 0.00
 1 23 12 4.22 0.00
 1 23 13 -2.07 0.00
 1 23 14 -0.96 0.00
 1 23 15 0.45 0.00
 1 23 16 1.01 0.00
 1 23 17 -7.85 0.00
 1 25 0 12.15 0.00
 1 25 1 4.56 0.00
 1 25 2 -7.12 0.00
 1 25 3 2.95 0.00
 1 25 4 8.62 0.00
 1 25 5 -4.34 0.00
 1 25 6 0.33 0.00
 1 25 7 -2.13 0.00
 1 25 8 -6.61 0.00
 1 25 9 -4.02 0.00
 1 25 10 -1.80 0.00
 1 25 11 -21.68 0.00
 1 25 12 -6.04 0.00
 1 25 13 4.08 0.00
 1 25 14 -0.14 0.00
 1 25 15 -7.09 0.00
 1 25 16 -4.21 0.00
 1 25 17 8.43 0.00
 1 27 0 -6.74 0.00
 1 27 1 -2.16 0.00
 1 27 2 -3.67 0.00
 1 27 3 2.71 0.00
 1 27 4 -1.83 0.00
 1 27 5 -3.84 0.00
 1 27 6 1.73 0.00
 1 27 7 1.63 0.00
 1 27 8 -4.79 0.00
 1 27 9 -1.81 0.00
 1 27 10 9.99 0.00
 1 27 11 -3.86 0.00
 1 27 12 -2.78 0.00
 1 27 13 1.72 0.00
 1 27 14 6.54 0.00
 1 27 15 6.64 0.00
 1 27 16 7.54 0.00
 1 29 0 -2.28 0.00
 1 29 1 -2.34 0.00
 1 29 2 -7.92 0.00
 1 29 3 -0.48 0.00
 1 29 4 -5.02 0.00
 1 29 5 -3.61 0.00
 1 29 6 -2.90 0.00
 1 29 7 -3.49 0.00
 1 29 8 3.42 0.00
 1 29 9 -4.95 0.00
 1 29 10 3.91 0.00
 1 29 11 -4.28 0.00
 1 29 12 -5.22 0.00
 1 29 13 -1.49 0.00
 1 29 14 -2.86 0.00
 1 29 15 4.32 0.00
 1 31 0 10.74 0.00
 1 31 1 4.76 0.00
 1 31 2 -6.57 0.00
 1 31 3 -9.58 0.00
 1 31 4 4.51 0.00
 1 31 5 -6.71 0.00
 1 31 6 -3.33 0.00
 1 31 7 -4.24 0.00
 1 31 8 -1.79 0.00
 1 31 9 -1.16 0.00
 1 31 10 -3.41 0.00
 1 31 11 -2.51 0.00
 1 31 12 0.08 0.00
 1 31 13 1.36 0.00
 1 31 14 -2.75 0.00
 1 31 15 -7.02 0.00
 1 33 0 1.41 0.00
 1 33 1 4.47 0.00
 1 33 2 -10.21 0.00
 1 33 3 0.76 0.00
 1 33 4 2.88 0.00
 1 33 5 8.34 0.00
 1 33 6 -2.80 0.00
 1 33 7 -6.21 0.00
 1 33 8 -0.14 0.00
 1 33 9 5.42 0.00
 1 33 10 -0.21 0.00
 1 33 11 1.46 0.00
 1 33 12 3.36 0.00
 1 33 13 0.96 0.00
 1 33 14 16.00 0.00
 1 35 0 -2.01 0.00
 1 35 1 -0.60 0.00
 1 35 2 -2.93 0.00
 1 35 3 -7.42 0.00
 1 35 4 -4.85 0.00
 1 35 5 -5.98 0.00
 1 35 6 0.60 0.00
 1 35 7 -6.81 0.00
 1 35 8 3.91 0.00
 1 35 9 -0.08 0.00
 1 35 10 -0.91 0.00
 1 35 11 0.52 0.00
 1 35 12 -2.94 0.00
 1 35 13 -5.75 0.00
 1 37 0 -3.89 0.00
 1 37 1 -1.19 0.00
 1 37 2 5.83 0.00
 1 37 3 -2.02 0.00
 1 37 4 -7.87 0.00
 1 37 5 2.74 0.00
 1 37 6 4.88 0.00
 1 37 7 -0.19 0.00
 1 37 8 0.81 0.00
 1 37 9 3.09 0.00
 1 37 10 -2.52 0.00
 1 37 11 1.08 0.00
 1 37 12 6.40 0.00
 1 39 0 -6.62 0.00
 1 39 1 1.53 0.00
 1 39 2 3.94 0.00
 1 39 3 4.29 0.00
 1 39 4 1.50 0.00
 1 39 5 -0.10 0.00
 1 39 6 10.69 0.00
 1 39 7 -3.69 0.00
 1 39 8 -3.93 0.00
 1 39 9 1.29 0.00
 1 39 10 3.59 0.00
 1 39 11 -1.54 0.00
 1 41 0 -4.96 0.00
 1 41 1 -4.27 0.00
 1 41 2 1.50 0.00
 1 41 3 -0.29 0.00
 1 41 4 30.41 0.00
 1 41 5 -1.59 0.00
 1 41 6 -22.08 0.00
 1 41 7 2.41 0.00
 1 41 8 4.83 0.00
 1 41 9 0.58 0.00
 1 41 10 -0.82 0.00
 1 43 0 15.09 0.00
 1 43 1 -2.62 0.00
 1 43 2 -11.08 0.00
 1 43 3 0.63 0.00
 1 43 4 11.39 0.00
 1 43 5 -0.87 0.00
 1 43 6 -4.32 0.00
 1 43 7 -3.04 0.00
 1 43 8 14.34 0.00
 1 43 9 -0.53 0.00
 1 45 0 2.68 0.00
 1 45 1 2.09 0.00
 1 45 2 -3.57 0.00
 1 45 3 -3.02 0.00
 1 45 4 8.89 0.00
 1 45 5 2.73 0.00
 1 45 6 -2.76 0.00
 1 45 7 2.07 0.00
 1 47 0 -4.08 0.00
 1 47 1 0.95 0.00
 1 47 2 1.44 0.00
 1 47 3 -1.53 0.00
 1 47 4 3.23 0.00
 1 47 5 1.28 0.00
 2 0 2 70.30 0.00
 2 0 4 -129.25 0.00
 2 0 6 60.56 0.00
 2 0 8 3.62 0.00
 2 0 10 -16.98 0.00
 2 0 12 -16.52 0.00
 2 0 14 -10.38 0.00
 2 0 16 6.33 0.00
 2 0 18 5.40 0.00
 2 2 0 657.94 0.00
 2 2 1 -19.06 0.00
 2 2 2 -99.26 0.00
 2 2 3 10.96 0.00
 2 2 4 116.26 0.00
 2 2 5 25.13 0.00
 2 2 6 -18.74 0.00
 2 2 7 6.52 0.00
 2 2 8 -5.09 0.00
 2 2 9 12.16 0.00
 2 2 10 -1.54 0.00
 2 2 11 1.66 0.00
 2 2 12 11.15 0.00
 2 2 13 -7.60 0.00
 2 2 14 4.26 0.00
 2 2 15 2.64 0.00
 2 2 16 -2.57 0.00
 2 2 17 3.03 0.00
 2 2 18 -1.01 0.00
 2 2 19 2.27 0.00
 2 4 0 90.56 0.00
 2 4 1 -25.97 0.00
 2 4 2 -114.40 0.00
 2 4 3 63.11 0.00
 2 4 4 72.77 0.00
 2 4 5 1.70 0.00
 2 4 6 -64.73 0.00
 2 4 7 -19.81 0.00
 2 4 8 13.96 0.00
 2 4 9 -5.67 0.00
 2 4 10 3.87 0.00
 2 4 11 -6.39 0.00
 2 4 12 -6.06 0.00
 2 4 13 -9.06 0.00
 2 4 14 -6.92 0.00
 2 4 15 1.78 0.00
 2 4 16 -5.34 0.00
 2 4 17 -2.16 0.00
 2 4 18 -5.51 0.00
 2 4 19 -6.54 0.00
 2 6 0 26.38 0.00
 2 6 1 -8.91 0.00
 2 6 2 51.78 0.00
 2 6 3 2.81 0.00
 2 6 4 -73.81 0.00
 2 6 5 -35.54 0.00
 2 6 6 79.24 0.00
 2 6 7 7.79 0.00
 2 6 8 -10.99 0.00
 2 6 9 2.64 0.00
 2 6 10 14.44 0.00
 2 6 11 11.00 0.00
 2 6 12 -0.07 0.00
 2 6 13 4.88 0.00
 2 6 14 5.18 0.00
 2 6 15 -0.45 0.00
 2 6 16 -4.74 0.00
 2 6 17 -0.57 0.00
 2 6 18 7.11 0.00
 2 6 19 -2.65 0.00
 2 8 0 4.42 0.00
 2 8 1 -15.71 0.00
 2 8 2 -29.58 0.00
 2 8 3 1.97 0.00
 2 8 4 -140.50 0.00
 2 8 5 55.26 0.00
 2 8 6 31.15 0.00
 2 8 7 13.86 0.00
 2 8 8 -31.08 0.00
 2 8 9 -1.50 0.00
 2 8 10 1.19 0.00
 2 8 11 1.41 0.00
 2 8 12 4.21 0.00
 2 8 13 -0.03 0.00
 2 8 14 -12.05 0.00
 2 8 15 -1.39 0.00
 2 8 16 -0.99 0.00
 2 8 17 12.99 0.00
 2 8 18 2.28 0.00
 2 8 19 -7.52 0.00
 2 10 0 -37.99 0.00
 2 10 1 -76.27 0.00
 2 10 2 -2.24 0.00
 2 10 3 34.42 0.00
 2 10 4 77.14 0.00
 2 10 5 -11.37 0.00
 2 10 6 -32.07 0.00
 2 10 7 -19.67 0.00
 2 10 8 23.70 0.00
 2 10 9 -10.33 0.00
 2 10 10 -6.73 0.00
 2 10 11 1.15 0.00
 2 10 12 1.92 0.00
 2 10 13 -3.01 0.00
 2 10 14 3.92 0.00
 2 10 15 -9.66 0.00
 2 10 16 -10.97 0.00
 2 10 17 -0.60 0.00
 2 10 18 6.27 0.00
 2 10 19 5.17 0.00
 2 12 0 -24.38 0.00
 2 12 1 31.17 0.00
 2 12 2 5.86 0.00
 2 12 3 -10.51 0.00
 2 12 4 -48.74 0.00
 2 12 5 5.58 0.00
 2 12 6 -0.99 0.00
 2 12 7 17.71 0.00
 2 12 8 -3.60 0.00
 2 12 9 14.80 0.00
 2 12 10 4.43 0.00
 2 12 11 2.65 0.00
 2 12 12 -0.22 0.00
 2 12 13 1.73 0.00
 2 12 14 7.96 0.00
 2 12 15 0.91 0.00
 2 12 16 -2.85 0.00
 2 12 17 7.39 0.00
 2 12 18 -3.21 0.00
 2 12 19 4.91 0.00
 2 14 0 5.70 0.00
 2 14 1 33.95 0.00
 2 14 2 29.21 0.00
 2 14 3 -38.57 0.00
 2 14 4 23.05 0.00
 2 14 5 47.65 0.00
 2 14 6 -25.45 0.00
 2 14 7 -2.98 0.00
 2 14 8 -6.67 0.00
 2 14 9 -8.30 0.00
 2 14 10 -4.06 0.00
 2 14 11 -1.99 0.00
 2 14 12 -4.92 0.00
 2 14 13 -0.96 0.00
 2 14 14 -8.46 0.00
 2 14 15 -5.13 0.00
 2 14 16 0.70 0.00
 2 14 17 -7.77 0.00
 2 14 18 -2.10 0.00
 2 16 0 -12.60 0.00
 2 16 1 -15.58 0.00
 2 16 2 -18.81 0.00
 2 16 3 -6.64 0.00
 2 16 4 11.94 0.00
 2 16 5 -4.97 0.00
 2 16 6 5.44 0.00
 2 16 7 5.16 0.00
 2 16 8 18.44 0.00
 2 16 9 -19.56 0.00
 2 16 10 -1.92 0.00
 2 16 11 1.66 0.00
 2 16 12 7.52 0.00
 2 16 13 -4.59 0.00
 2 16 14 -3.79 0.00
 2 16 15 6.95 0.00
 2 16 16 -3.84 0.00
 2 16 17 -5.90 0.00
 2 16 18 1.37 0.00
 2 18 0 13.32 0.00
 2 18 1 -10.49 0.00
 2 18 2 -0.82 0.00
 2 18 3 24.79 0.00
 2 18 4 -25.61 0.00
 2 18 5 6.04 0.00
 2 18 6 22.24 0.00
 2 18 7 17.21 0.00
 2 18 8 -11.48 0.00
 2 18 9 -6.64 0.00
 2 18 10 2.40 0.00
 2 18 11 10.25 0.00
 2 18 12 -25.88 0.00
 2 18 13 2.83 0.00
 2 18 14 10.42 0.00
 2 18 15 1.70 0.00
 2 18 16 -16.72 0.00
 2 18 17 4.80 0.00
 2 18 18 1.53 0.00
 2 20 0 -8.55 0.00
 2 20 1 -24.69 0.00
 2 20 2 16.13 0.00
 2 20 3 -7.58 0.00
 2 20 4 -14.26 0.00
 2 20 5 12.43 0.00
 2 20 6 3.13 0.00
 2 20 7 -7.20 0.00
 2 20 8 -2.37 0.00
 2 20 9 3.47 0.00
 2 20 10 8.02 0.00
 2 20 11 -8.48 0.00
 2 20 12 2.17 0.00
 2 20 13 -2.65 0.00
 2 20 14 -1.05 0.00
 2 20 15 -6.77 0.00
 2 20 16 -1.44 0.00
 2 20 17 -5.37 0.00
 2 20 18 -3.88 0.00
 2 22 0 8.49 0.00
 2 22 1 1.58 0.00
 2 22 2 -7.82 0.00
 2 22 3 -0.01 0.00
 2 22 4 -5.94 0.00
 2 22 5 -8.43 0.00
 2 22 6 -2.29 0.00
 2 22 7 5.13 0.00
 2 22 8 6.96 0.00
 2 22 9 -9.96 0.00
 2 22 10 0.51 0.00
 2 22 11 4.14 0.00
 2 22 12 4.03 0.00
 2 22 13 2.68 0.00
 2 22 14 -9.39 0.00
 2 22 15 1.65 0.00
 2 22 16 6.34 0.00
 2 22 17 -10.11 0.00
 2 24 0 6.56 0.00
 2 24 1 -14.63 0.00
 2 24 2 -3.81 0.00
 2 24 3 2.67 0.00
 2 24 4 4.32 0.00
 2 24 5 9.09 0.00
 2 24 6 2.50 0.00
 2 24 7 9.78 0.00
 2 24 8 -6.81 0.00
 2 24 9 8.15 0.00
 2 24 10 2.82 0.00
 2 24 11 -5.94 0.00
 2 24 12 -3.29 0.00
 2 24 13 2.98 0.00
 2 24 14 4.08 0.00
 2 24 15 -6.20 0.00
 2 24 16 1.23 0.00
 2 24 17 4.05 0.00
 2 26 0 -18.70 0.00
 2 26 1 0.00 0.00
 2 26 2 3.20 0.00
 2 26 3 -1.68 0.00
 2 26 4 -9.08 0.00
 2 26 5 2.14 0.00
 2 26 6 3.84 0.00
 2 26 7 -13.51 0.00
 2 26 8 -2.70 0.00
 2 26 9 3.60 0.00
 2 26 10 2.97 0.00
 2 26 11 -5.81 0.00
 2 26 12 1.25 0.00
 2 26 13 3.28 0.00
 2 26 14 2.89 0.00
 2 26 15 -0.32 0.00
 2 26 16 2.97 0.00
 2 28 0 -10.04 0.00
 2 28 1 9.72 0.00
 2 28 2 8.45 0.00
 2 28 3 -3.93 0.00
 2 28 4 2.92 0.00
 2 28 5 1.34 0.00
 2 28 6 1.57 0.00
 2 28 7 -1.23 0.00
 2 28 8 13.53 0.00
 2 28 9 -5.40 0.00
 2 28 10 1.77 0.00
 2 28 11 -3.73 0.00
 2 28 12 3.02 0.00
 2 28 13 -0.38 0.00
 2 28 14 -7.14 0.00
 2 28 15 0.00 0.00
 2 28 16 -4.67 0.00
 2 30 0 9.35 0.00
 2 30 1 -7.35 0.00
 2 30 2 -7.04 0.00
 2 30 3 7.35 0.00
 2 30 4 8.17 0.00
 2 30 5 0.05 0.00
 2 30 6 -8.86 0.00
 2 30 7 15.24 0.00
 2 30 8 -0.28 0.00
 2 30 9 -3.21 0.00
 2 30 10 0.74 0.00
 2 30 11 6.07 0.00
 2 30 12 4.56 0.00
 2 30 13 -1.62 0.00
 2 30 14 -2.08 0.00
 2 30 15 6.44 0.00
 2 32 0 -3.66 0.00
 2 32 1 -1.80 0.00
 2 32 2 -4.16 0.00
 2 32 3 1.19 0.00
 2 32 4 5.83 0.00
 2 32 5 -4.46 0.00
 2 32 6 7.53 0.00
 2 32 7 -4.20 0.00
 2 32 8 5.45 0.00
 2 32 9 -6.47 0.00
 2 32 10 8.30 0.00
 2 32 11 -5.49 0.00
 2 32 12 -5.17 0.00
 2 32 13 -0.99 0.00
 2 32 14 -3.73 0.00
 2 34 0 2.01 0.00
 2 34 1 5.02 0.00
 2 34 2 5.21 0.00
 2 34 3 -5.07 0.00
 2 34 4 1.35 0.00
 2 34 5 0.48 0.00
 2 34 6 -3.52 0.00
 2 34 7 3.01 0.00
 2 34 8 -1.33 0.00
 2 34 9 2.36 0.00
 2 34 10 1.14 0.00
 2 34 11 -0.12 0.00
 2 34 12 0.27 0.00
 2 34 13 0.02 0.00
 2 34 14 -8.15 0.00
 2 36 0 -3.39 0.00
 2 36 1 -0.22 0.00
 2 36 2 -3.56 0.00
 2 36 3 0.89 0.00
 2 36 4 -1.58 0.00
 2 36 5 1.55 0.00
 2 36 6 5.88 0.00
 2 36 7 3.84 0.00
 2 36 8 0.35 0.00
 2 36 9 4.54 0.00
 2 36 10 4.44 0.00
 2 36 11 0.07 0.00
 2 36 12 4.77 0.00
 2 36 13 1.99 0.00
 2 38 0 -2.94 0.00
 2 38 1 -6.80 0.00
 2 38 2 3.09 0.00
 2 38 3 -0.47 0.00
 2 38 4 -5.11 0.00
 2 38 5 -3.45 0.00
 2 38 6 5.11 0.00
 2 38 7 -0.09 0.00
 2 38 8 -2.40 0.00
 2 38 9 -3.91 0.00
 2 38 10 -0.65 0.00
 2 38 11 2.04 0.00
 2 38 12 6.18 0.00
 2 40 0 -0.62 0.00
 2 40 1 -14.55 0.00
 2 40 2 -0.19 0.00
 2 40 3 10.36 0.00
 2 40 4 -7.27 0.00
 2 40 5 -6.41 0.00
 2 40 6 0.19 0.00
 2 40 7 9.97 0.00
 2 40 8 -3.31 0.00
 2 40 9 0.03 0.00
 2 40 10 1.88 0.00
 2 42 0 1.73 0.00
 2 42 1 -5.96 0.00
 2 42 2 -1.24 0.00
 2 42 3 16.32 0.00
 2 42 4 5.46 0.00
 2 42 5 -23.55 0.00
 2 42 6 -2.99 0.00
 2 42 7 3.79 0.00
 2 42 8 1.10 0.00
 2 42 9 -4.65 0.00
 2 44 0 2.13 0.00
 2 44 1 -3.28 0.00
 2 44 2 -1.57 0.00
 2 44 3 1.15 0.00
 2 44 4 3.46 0.00
 2 44 5 0.74 0.00
 2 44 6 -3.07 0.00
 2 44 7 0.01 0.00
 2 44 8 3.32 0.00
 2 46 0 0.87 0.00
 2 46 1 1.89 0.00
 2 46 2 -3.68 0.00
 2 46 3 -6.74 0.00
 2 46 4 -2.54 0.00
 2 46 5 5.07 0.00
 2 46 6 1.44 0.00
 2 48 0 7.31 0.00
 2 48 1 -1.56 0.00
 2 48 2 0.49 0.00
 3 1 0 -2.38 0.00
 3 1 1 -123.68 0.00
 3 1 2 42.34 0.00
 3 1 3 -16.99 0.00
 3 1 4 17.64 0.00
 3 1 5 25.95 0.00
 3 1 6 7.39 0.00
 3 1 7 -3.26 0.00
 3 1 8 2.98 0.00
 3 1 9 -30.03 0.00
 3 1 10 3.82 0.00
 3 1 11 -3.76 0.00
 3 1 12 -16.34 0.00
 3 1 13 -6.84 0.00
 3 1 14 -1.51 0.00
 3 1 15 -2.25 0.00
 3 1 16 5.11 0.00
 3 1 17 6.36 0.00
 3 1 18 -3.61 0.00
 3 1 19 -5.20 0.00
 3 3 0 -54.30 0.00
 3 3 1 -185.18 0.00
 3 3 2 -2.71 0.00
 3 3 3 -7.81 0.00
 3 3 4 25.57 0.00
 3 3 5 53.38 0.00
 3 3 6 -7.13 0.00
 3 3 7 -27.72 0.00
 3 3 8 7.93 0.00
 3 3 9 25.71 0.00
 3 3 10 7.16 0.00
 3 3 11 2.89 0.00
 3 3 12 -2.30 0.00
 3 3 13 -2.10 0.00
 3 3 14 -2.11 0.00
 3 3 15 -19.71 0.00
 3 3 16 -0.38 0.00
 3 3 17 5.44 0.00
 3 3 18 -3.41 0.00
 3 3 19 -1.33 0.00
 3 5 0 -43.61 0.00
 3 5 1 79.91 0.00
 3 5 2 109.89 0.00
 3 5 3 -2.01 0.00
 3 5 4 -74.83 0.00
 3 5 5 -4.39 0.00
 3 5 6 9.03 0.00
 3 5 7 3.76 0.00
 3 5 8 -4.47 0.00
 3 5 9 25.80 0.00
 3 5 10 -5.16 0.00
 3 5 11 -8.56 0.00
 3 5 12 -1.90 0.00
 3 5 13 8.28 0.00
 3 5 14 2.23 0.00
 3 5 15 0.50 0.00
 3 5 16 2.09 0.00
 3 5 17 -6.43 0.00
 3 5 18 1.36 0.00
 3 5 19 12.32 0.00
 3 7 0 -43.38 0.00
 3 7 1 23.77 0.00
 3 7 2 -73.26 0.00
 3 7 3 3.61 0.00
 3 7 4 -28.41 0.00
 3 7 5 -25.81 0.00
 3 7 6 -3.61 0.00
 3 7 7 11.81 0.00
 3 7 8 -5.11 0.00
 3 7 9 -32.50 0.00
 3 7 10 20.63 0.00
 3 7 11 -4.37 0.00
 3 7 12 3.59 0.00
 3 7 13 -9.04 0.00
 3 7 14 -5.76 0.00
 3 7 15 -2.43 0.00
 3 7 16 -5.88 0.00
 3 7 17 -3.90 0.00
 3 7 18 -0.33 0.00
 3 7 19 -12.71 0.00
 3 9 0 45.60 0.00
 3 9 1 -16.70 0.00
 3 9 2 39.38 0.00
 3 9 3 0.62 0.00
 3 9 4 66.86 0.00
 3 9 5 10.31 0.00
 3 9 6 -24.35 0.00
 3 9 7 36.15 0.00
 3 9 8 7.06 0.00
 3 9 9 -16.52 0.00
 3 9 10 -6.98 0.00
 3 9 11 24.42 0.00
 3 9 12 1.83 0.00
 3 9 13 -3.32 0.00
 3 9 14 3.42 0.00
 3 9 15 14.17 0.00
 3 9 16 2.19 0.00
 3 9 17 1.28 0.00
 3 9 18 2.01 0.00
 3 9 19 0.69 0.00
 3 11 0 -23.95 0.00
 3 11 1 23.19 0.00
 3 11 2 36.49 0.00
 3 11 3 6.44 0.00
 3 11 4 -31.58 0.00
 3 11 5 -12.15 0.00
 3 11 6 0.51 0.00
 3 11 7 -4.06 0.00
 3 11 8 -14.44 0.00
 3 11 9 -3.05 0.00
 3 11 10 -0.67 0.00
 3 11 11 -6.63 0.00
 3 11 12 -8.27 0.00
 3 11 13 -3.10 0.00
 3 11 14 3.27 0.00
 3 11 15 3.59 0.00
 3 11 16 -0.39 0.00
 3 11 17 12.69 0.00
 3 11 18 5.01 0.00
 3 11 19 0.95 0.00
 3 13 0 53.41 0.00
 3 13 1 14.67 0.00
 3 13 2 17.76 0.00
 3 13 3 -6.77 0.00
 3 13 4 35.76 0.00
 3 13 5 20.35 0.00
 3 13 6 26.43 0.00
 3 13 7 8.32 0.00
 3 13 8 -8.08 0.00
 3 13 9 10.59 0.00
 3 13 10 -0.44 0.00
 3 13 11 -12.45 0.00
 3 13 12 9.85 0.00
 3 13 13 1.71 0.00
 3 13 14 -8.24 0.00
 3 13 15 2.52 0.00
 3 13 16 -5.35 0.00
 3 13 17 -1.91 0.00
 3 13 18 -6.44 0.00
 3 13 19 9.47 0.00
 3 15 0 23.81 0.00
 3 15 1 20.38 0.00
 3 15 2 -24.35 0.00
 3 15 3 6.15 0.00
 3 15 4 9.91 0.00
 3 15 5 -8.88 0.00
 3 15 6 -3.42 0.00
 3 15 7 -1.71 0.00
 3 15 8 -0.52 0.00
 3 15 9 8.72 0.00
 3 15 10 4.71 0.00
 3 15 11 -1.96 0.00
 3 15 12 2.26 0.00
 3 15 13 2.99 0.00
 3 15 14 -11.23 0.00
 3 15 15 12.52 0.00
 3 15 16 5.03 0.00
 3 15 17 -0.71 0.00
 3 15 18 -2.14 0.00
 3 17 0 -14.68 0.00
 3 17 1 13.73 0.00
 3 17 2 -1.55 0.00
 3 17 3 9.81 0.00
 3 17 4 -5.97 0.00
 3 17 5 0.73 0.00
 3 17 6 38.82 0.00
 3 17 7 7.39 0.00
 3 17 8 -7.13 0.00
 3 17 9 -12.04 0.00
 3 17 10 1.52 0.00
 3 17 11 1.64 0.00
 3 17 12 -10.96 0.00
 3 17 13 -0.06 0.00
 3 17 14 2.93 0.00
 3 17 15 0.45 0.00
 3 17 16 -4.43 0.00
 3 17 17 1.21 0.00
 3 17 18 2.95 0.00
 3 19 0 4.20 0.00
 3 19 1 -2.24 0.00
 3 19 2 -9.69 0.00
 3 19 3 22.62 0.00
 3 19 4 -4.57 0.00
 3 19 5 -13.30 0.00
 3 19 6 -4.14 0.00
 3 19 7 -0.07 0.00
 3 19 8 2.32 0.00
 3 19 9 -14.90 0.00
 3 19 10 -2.82 0.00
 3 19 11 1.56 0.00
 3 19 12 -1.85 0.00
 3 19 13 -3.92 0.00
 3 19 14 16.14 0.00
 3 19 15 1.65 0.00
 3 19 16 -5.93 0.00
 3 19 17 -3.33 0.00
 3 19 18 -3.00 0.00
 3 21 0 1.74 0.00
 3 21 1 8.49 0.00
 3 21 2 9.00 0.00
 3 21 3 9.50 0.00
 3 21 4 10.32 0.00
 3 21 5 -1.31 0.00
 3 21 6 4.17 0.00
 3 21 7 -0.23 0.00
 3 21 8 11.45 0.00
 3 21 9 13.03 0.00
 3 21 10 -10.09 0.00
 3 21 11 -9.82 0.00
 3 21 12 2.16 0.00
 3 21 13 -13.33 0.00
 3 21 14 -9.66 0.00
 3 21 15 9.90 0.00
 3 21 16 6.84 0.00
 3 21 17 -7.49 0.00
 3 23 0 2.81 0.00
 3 23 1 -1.84 0.00
 3 23 2 -13.89 0.00
 3 23 3 10.97 0.00
 3 23 4 -8.63 0.00
 3 23 5 -1.41 0.00
 3 23 6 -1.00 0.00
 3 23 7 4.39 0.00
 3 23 8 -8.29 0.00
 3 23 9 -4.63 0.00
 3 23 10 3.94 0.00
 3 23 11 -11.52 0.00
 3 23 12 -0.46 0.00
 3 23 13 -8.20 0.00
 3 23 14 -2.47 0.00
 3 23 15 -0.62 0.00
 3 23 16 -1.67 0.00
 3 23 17 -5.92 0.00
 3 25 0 1.62 0.00
 3 25 1 8.54 0.00
 3 25 2 5.20 0.00
 3 25 3 -1.02 0.00
 3 25 4 7.37 0.00
 3 25 5 -2.93 0.00
 3 25 6 7.93 0.00
 3 25 7 -0.89 0.00
 3 25 8 2.84 0.00
 3 25 9 10.18 0.00
 3 25 10 -2.13 0.00
 3 25 11 -21.84 0.00
 3 25 12 -0.39 0.00
 3 25 13 -3.27 0.00
 3 25 14 9.27 0.00
 3 25 15 3.57 0.00
 3 25 16 -10.84 0.00
 3 27 0 -6.50 0.00
 3 27 1 0.71 0.00
 3 27 2 5.85 0.00
 3 27 3 1.54 0.00
 3 27 4 -9.37 0.00
 3 27 5 -2.11 0.00
 3 27 6 5.77 0.00
 3 27 7 0.67 0.00
 3 27 8 3.15 0.00
 3 27 9 -0.03 0.00
 3 27 10 -2.72 0.00
 3 27 11 3.20 0.00
 3 27 12 -6.06 0.00
 3 27 13 0.31 0.00
 3 27 14 1.17 0.00
 3 27 15 1.77 0.00
 3 27 16 4.57 0.00
 3 29 0 2.24 0.00
 3 29 1 1.68 0.00
 3 29 2 -11.91 0.00
 3 29 3 -3.68 0.00
 3 29 4 -4.47 0.00
 3 29 5 4.96 0.00
 3 29 6 -2.94 0.00
 3 29 7 -4.94 0.00
 3 29 8 -3.57 0.00
 3 29 9 -10.11 0.00
 3 29 10 14.37 0.00
 3 29 11 -6.93 0.00
 3 29 12 0.93 0.00
 3 29 13 5.15 0.00
 3 29 14 -1.12 0.00
 3 29 15 0.64 0.00
 3 31 0 -0.61 0.00
 3 31 1 -3.79 0.00
 3 31 2 11.00 0.00
 3 31 3 -6.13 0.00
 3 31 4 7.94 0.00
 3 31 5 -1.51 0.00
 3 31 6 3.69 0.00
 3 31 7 -9.37 0.00
 3 31 8 -6.48 0.00
 3 31 9 4.37 0.00
 3 31 10 -1.10 0.00
 3 31 11 3.31 0.00
 3 31 12 -9.70 0.00
 3 31 13 -2.55 0.00
 3 31 14 10.25 0.00
 3 31 15 -10.23 0.00
 3 33 0 -3.56 0.00
 3 33 1 -0.22 0.00
 3 33 2 -9.25 0.00
 3 33 3 2.39 0.00
 3 33 4 -5.27 0.00
 3 33 5 3.30 0.00
 3 33 6 -5.61 0.00
 3 33 7 -0.53 0.00
 3 33 8 3.30 0.00
 3 33 9 -1.04 0.00
 3 33 10 2.42 0.00
 3 33 11 1.09 0.00
 3 33 12 7.23 0.00
 3 33 13 3.00 0.00
 3 33 14 5.07 0.00
 3 35 0 5.60 0.00
 3 35 1 3.51 0.00
 3 35 2 -1.63 0.00
 3 35 3 -8.51 0.00
 3 35 4 3.58 0.00
 3 35 5 1.63 0.00
 3 35 6 -4.21 0.00
 3 35 7 -5.73 0.00
 3 35 8 1.26 0.00
 3 35 9 3.67 0.00
 3 35 10 -0.93 0.00
 3 35 11 -1.76 0.00
 3 35 12 3.65 0.00
 3 35 13 -5.27 0.00
 3 37 0 -11.44 0.00
 3 37 1 -0.91 0.00
 3 37 2 1.16 0.00
 3 37 3 -1.20 0.00
 3 37 4 -2.37 0.00
 3 37 5 1.66 0.00
 3 37 6 6.78 0.00
 3 37 7 -2.34 0.00
 3 37 8 -4.72 0.00
 3 37 9 2.81 0.00
 3 37 10 4.94 0.00
 3 37 11 -1.92 0.00
 3 37 12 10.16 0.00
 3 39 0 8.13 0.00
 3 39 1 -4.53 0.00
 3 39 2 -3.74 0.00
 3 39 3 5.83 0.00
 3 39 4 3.57 0.00
 3 39 5 -2.89 0.00
 3 39 6 -0.53 0.00
 3 39 7 4.09 0.00
 3 39 8 0.33 0.00
 3 39 9 2.59 0.00
 3 39 10 3.35 0.00
 3 39 11 -5.78 0.00
 3 41 0 15.06 0.00
 3 41 1 -4.36 0.00
 3 41 2 -11.41 0.00
 3 41 3 0.24 0.00
 3 41 4 9.89 0.00
 3 41 5 -2.29 0.00
 3 41 6 4.46 0.00
 3 41 7 -0.95 0.00
 3 41 8 14.83 0.00
 3 41 9 5.59 0.00
 3 41 10 -6.16 0.00
 3 43 0 -6.37 0.00
 3 43 1 1.17 0.00
 3 43 2 2.81 0.00
 3 43 3 -3.02 0.00
 3 43 4 7.15 0.00
 3 43 5 -5.00 0.00
 3 43 6 -9.62 0.00
 3 43 7 -0.16 0.00
 3 43 8 4.06 0.00
 3 43 9 -3.53 0.00
 3 45 0 2.31 0.00
 3 45 1 0.12 0.00
 3 45 2 1.03 0.00
 3 45 3 -3.39 0.00
 3 45 4 3.35 0.00
 3 45 5 3.24 0.00
 3 45 6 -1.98 0.00
 3 45 7 -0.35 0.00
 3 47 0 5.92 0.00
 3 47 1 -1.93 0.00
 3 47 2 -12.00 0.00
 3 47 3 0.79 0.00
 3 47 4 6.44 0.00
 4 0 0 345.69 0.00
 4 0 2 189.46 0.00
 4 0 4 11.06 0.00
 4 0 6 20.47 0.00
 4 0 8 2.88 0.00
 4 0 10 -3.83 0.00
 4 0 12 8.63 0.00
 4 0 14 -2.45 0.00
 4 0 16 9.99 0.00
 4 0 18 6.53 0.00
 4 2 0 -48.81 0.00
 4 2 1 -91.07 0.00
 4 2 2 33.71 0.00
 4 2 3 37.33 0.00
 4 2 4 -14.37 0.00
 4 2 5 19.99 0.00
 4 2 6 -9.45 0.00
 4 2 7 7.42 0.00
 4 2 8 1.42 0.00
 4 2 9 -9.65 0.00
 4 2 10 -7.56 0.00
 4 2 11 3.21 0.00
 4 2 12 -0.59 0.00
 4 2 13 -2.09 0.00
 4 2 14 -4.18 0.00
 4 2 15 1.47 0.00
 4 2 16 -2.47 0.00
 4 2 17 -2.26 0.00
 4 2 18 -1.95 0.00
 4 2 19 5.31 0.00
 4 4 0 29.84 0.00
 4 4 1 -19.85 0.00
 4 4 2 33.39 0.00
 4 4 3 31.87 0.00
 4 4 4 16.27 0.00
 4 4 5 -21.75 0.00
 4 4 6 -12.07 0.00
 4 4 7 1.51 0.00
 4 4 8 9.24 0.00
 4 4 9 23.26 0.00
 4 4 10 3.91 0.00
 4 4 11 -16.60 0.00
 4 4 12 5.27 0.00
 4 4 13 -2.28 0.00
 4 4 14 18.15 0.00
 4 4 15 -4.27 0.00
 4 4 16 -7.03 0.00
 4 4 17 1.83 0.00
 4 4 18 -13.65 0.00
 4 4 19 -2.97 0.00
 4 6 0 96.63 0.00
 4 6 1 -97.51 0.00
 4 6 2 -91.93 0.00
 4 6 3 36.53 0.00
 4 6 4 -15.93 0.00
 4 6 5 -34.97 0.00
 4 6 6 19.38 0.00
 4 6 7 -3.67 0.00
 4 6 8 -1.07 0.00
 4 6 9 -1.84 0.00
 4 6 10 13.14 0.00
 4 6 11 0.77 0.00
 4 6 12 -5.02 0.00
 4 6 13 2.91 0.00
 4 6 14 -0.18 0.00
 4 6 15 0.99 0.00
 4 6 16 -12.83 0.00
 4 6 17 -1.13 0.00
 4 6 18 10.66 0.00
 4 6 19 -9.87 0.00
 4 8 0 -30.00 0.00
 4 8 1 -32.95 0.00
 4 8 2 -90.78 0.00
 4 8 3 33.53 0.00
 4 8 4 2.85 0.00
 4 8 5 11.65 0.00
 4 8 6 -23.90 0.00
 4 8 7 4.71 0.00
 4 8 8 9.00 0.00
 4 8 9 4.04 0.00
 4 8 10 -0.34 0.00
 4 8 11 8.80 0.00
 4 8 12 2.15 0.00
 4 8 13 -10.65 0.00
 4 8 14 12.32 0.00
 4 8 15 15.35 0.00
 4 8 16 -8.10 0.00
 4 8 17 -2.80 0.00
 4 8 18 -4.05 0.00
 4 8 19 2.89 0.00
 4 10 0 23.34 0.00
 4 10 1 -8.26 0.00
 4 10 2 9.66 0.00
 4 10 3 -28.15 0.00
 4 10 4 -45.17 0.00
 4 10 5 -6.83 0.00
 4 10 6 24.15 0.00
 4 10 7 2.30 0.00
 4 10 8 -14.57 0.00
 4 10 9 -13.91 0.00
 4 10 10 -2.98 0.00
 4 10 11 1.68 0.00
 4 10 12 16.03 0.00
 4 10 13 1.83 0.00
 4 10 14 -20.41 0.00
 4 10 15 -12.80 0.00
 4 10 16 4.18 0.00
 4 10 17 6.04 0.00
 4 10 18 -1.51 0.00
 4 10 19 -2.95 0.00
 4 12 0 -7.59 0.00
 4 12 1 2.41 0.00
 4 12 2 -16.85 0.00
 4 12 3 -0.99 0.00
 4 12 4 26.56 0.00
 4 12 5 12.19 0.00
 4 12 6 -20.79 0.00
 4 12 7 14.96 0.00
 4 12 8 6.54 0.00
 4 12 9 -3.14 0.00
 4 12 10 8.31 0.00
 4 12 11 -19.26 0.00
 4 12 12 -0.78 0.00
 4 12 13 17.14 0.00
 4 12 14 9.25 0.00
 4 12 15 -12.72 0.00
 4 12 16 -5.17 0.00
 4 12 17 -3.24 0.00
 4 12 18 -5.09 0.00
 4 12 19 -1.40 0.00
 4 14 0 -8.19 0.00
 4 14 1 5.37 0.00
 4 14 2 12.02 0.00
 4 14 3 -19.18 0.00
 4 14 4 -8.13 0.00
 4 14 5 8.88 0.00
 4 14 6 -33.14 0.00
 4 14 7 3.95 0.00
 4 14 8 16.02 0.00
 4 14 9 -6.73 0.00
 4 14 10 -7.47 0.00
 4 14 11 7.42 0.00
 4 14 12 -6.73 0.00
 4 14 13 0.57 0.00
 4 14 14 4.43 0.00
 4 14 15 3.83 0.00
 4 14 16 -3.52 0.00
 4 14 17 5.00 0.00
 4 14 18 2.54 0.00
 4 16 0 -12.26 0.00
 4 16 1 -7.38 0.00
 4 16 2 0.10 0.00
 4 16 3 3.48 0.00
 4 16 4 -11.26 0.00
 4 16 5 22.11 0.00
 4 16 6 23.27 0.00
 4 16 7 1.89 0.00
 4 16 8 -12.57 0.00
 4 16 9 -3.04 0.00
 4 16 10 4.24 0.00
 4 16 11 -7.70 0.00
 4 16 12 2.77 0.00
 4 16 13 -4.56 0.00
 4 16 14 -9.65 0.00
 4 16 15 -9.91 0.00
 4 16 16 -6.53 0.00
 4 16 17 -10.92 0.00
 4 16 18 -2.32 0.00
 4 18 0 18.24 0.00
 4 18 1 0.00 0.00
 4 18 2 -3.70 0.00
 4 18 3 -7.39 0.00
 4 18 4 -9.13 0.00
 4 18 5 -4.94 0.00
 4 18 6 9.27 0.00
 4 18 7 4.36 0.00
 4 18 8 4.00 0.00
 4 18 9 -3.57 0.00
 4 18 10 -6.85 0.00
 4 18 11 -1.72 0.00
 4 18 12 2.38 0.00
 4 18 13 -3.48 0.00
 4 18 14 4.44 0.00
 4 18 15 23.94 0.00
 4 18 16 1.44 0.00
 4 18 17 -1.09 0.00
 4 18 18 -3.15 0.00
 4 20 0 -11.72 0.00
 4 20 1 -10.09 0.00
 4 20 2 -8.09 0.00
 4 20 3 14.10 0.00
 4 20 4 -24.47 0.00
 4 20 5 -3.80 0.00
 4 20 6 5.19 0.00
 4 20 7 12.71 0.00
 4 20 8 5.39 0.00
 4 20 9 -6.54 0.00
 4 20 10 3.05 0.00
 4 20 11 8.44 0.00
 4 20 12 -10.21 0.00
 4 20 13 4.15 0.00
 4 20 14 -8.62 0.00
 4 20 15 -23.63 0.00
 4 20 16 -0.95 0.00
 4 20 17 4.19 0.00
 4 22 0 20.25 0.00
 4 22 1 -8.46 0.00
 4 22 2 -3.27 0.00
 4 22 3 -5.35 0.00
 4 22 4 13.40 0.00
 4 22 5 12.26 0.00
 4 22 6 0.96 0.00
 4 22 7 -7.49 0.00
 4 22 8 -4.07 0.00
 4 22 9 7.06 0.00
 4 22 10 1.17 0.00
 4 22 11 -11.29 0.00
 4 22 12 -10.43 0.00
 4 22 13 6.83 0.00
 4 22 14 10.11 0.00
 4 22 15 -16.77 0.00
 4 22 16 9.40 0.00
 4 22 17 2.93 0.00
 4 24 0 -8.09 0.00
 4 24 1 13.23 0.00
 4 24 2 -5.08 0.00
 4 24 3 -16.40 0.00
 4 24 4 -0.86 0.00
 4 24 5 16.29 0.00
 4 24 6 -8.42 0.00
 4 24 7 -3.05 0.00
 4 24 8 6.25 0.00
 4 24 9 7.12 0.00
 4 24 10 6.32 0.00
 4 24 11 -4.29 0.00
 4 24 12 -1.64 0.00
 4 24 13 2.13 0.00
 4 24 14 -1.29 0.00
 4 24 15 2.57 0.00
 4 24 16 -3.32 0.00
 4 24 17 5.05 0.00
 4 26 0 -6.72 0.00
 4 26 1 3.64 0.00
 4 26 2 3.68 0.00
 4 26 3 1.80 0.00
 4 26 4 0.72 0.00
 4 26 5 0.19 0.00
 4 26 6 3.81 0.00
 4 26 7 8.25 0.00
 4 26 8 3.58 0.00
 4 26 9 -3.54 0.00
 4 26 10 -1.79 0.00
 4 26 11 1.37 0.00
 4 26 12 3.41 0.00
 4 26 13 -6.49 0.00
 4 26 14 -1.25 0.00
 4 26 15 1.64 0.00
 4 26 16 3.93 0.00
 4 28 0 -4.18 0.00
 4 28 1 -9.25 0.00
 4 28 2 0.13 0.00
 4 28 3 10.26 0.00
 4 28 4 3.71 0.00
 4 28 5 -4.22 0.00
 4 28 6 -1.60 0.00
 4 28 7 6.21 0.00
 4 28 8 4.61 0.00
 4 28 9 -10.86 0.00
 4 28 10 4.97 0.00
 4 28 11 6.44 0.00
 4 28 12 -5.33 0.00
 4 28 13 -4.44 0.00
 4 28 14 -0.74 0.00
 4 28 15 10.66 0.00
 4 30 0 -4.06 0.00
 4 30 1 -6.35 0.00
 4 30 2 8.62 0.00
 4 30 3 3.95 0.00
 4 30 4 6.69 0.00
 4 30 5 9.10 0.00
 4 30 6 -0.64 0.00
 4 30 7 2.80 0.00
 4 30 8 2.88 0.00
 4 30 9 3.00 0.00
 4 30 10 7.35 0.00
 4 30 11 -7.69 0.00
 4 30 12 9.78 0.00
 4 30 13 1.84 0.00
 4 30 14 -9.81 0.00
 4 30 15 8.47 0.00
 4 32 0 8.47 0.00
 4 32 1 1.92 0.00
 4 32 2 -6.87 0.00
 4 32 3 -1.35 0.00
 4 32 4 -3.69 0.00
 4 32 5 -3.48 0.00
 4 32 6 9.37 0.00
 4 32 7 3.60 0.00
 4 32 8 0.94 0.00
 4 32 9 1.73 0.00
 4 32 10 1.41 0.00
 4 32 11 2.80 0.00
 4 32 12 -1.92 0.00
 4 32 13 -4.29 0.00
 4 32 14 2.15 0.00
 4 34 0 6.80 0.00
 4 34 1 4.25 0.00
 4 34 2 0.31 0.00
 4 34 3 0.62 0.00
 4 34 4 3.53 0.00
 4 34 5 2.40 0.00
 4 34 6 -1.42 0.00
 4 34 7 1.75 0.00
 4 34 8 4.41 0.00
 4 34 9 -1.86 0.00
 4 34 10 0.36 0.00
 4 34 11 1.32 0.00
 4 34 12 1.45 0.00
 4 34 13 1.12 0.00
 4 36 0 -5.29 0.00
 4 36 1 -16.15 0.00
 4 36 2 3.55 0.00
 4 36 3 4.28 0.00
 4 36 4 -0.84 0.00
 4 36 5 6.32 0.00
 4 36 6 -0.72 0.00
 4 36 7 4.74 0.00
 4 36 8 2.93 0.00
 4 36 9 6.01 0.00
 4 36 10 2.19 0.00
 4 36 11 -5.61 0.00
 4 36 12 -0.02 0.00
 4 36 13 -1.33 0.00
 4 38 0 -4.64 0.00
 4 38 1 -7.78 0.00
 4 38 2 -1.28 0.00
 4 38 3 3.51 0.00
 4 38 4 -3.64 0.00
 4 38 5 3.00 0.00
 4 38 6 8.26 0.00
 4 38 7 -1.97 0.00
 4 38 8 -5.34 0.00
 4 38 9 0.32 0.00
 4 38 10 6.28 0.00
 4 38 11 6.60 0.00
 4 40 0 -0.06 0.00
 4 40 1 -8.16 0.00
 4 40 2 -0.79 0.00
 4 40 3 -2.39 0.00
 4 40 4 1.91 0.00
 4 40 5 1.33 0.00
 4 40 6 -5.63 0.00
 4 40 7 4.50 0.00
 4 40 8 -4.20 0.00
 4 40 9 -1.95 0.00
 4 40 10 0.34 0.00
 4 42 0 4.68 0.00
 4 42 1 -21.07 0.00
 4 42 2 -4.42 0.00
 4 42 3 7.75 0.00
 4 42 4 -0.44 0.00
 4 42 5 1.51 0.00
 4 42 6 -0.79 0.00
 4 42 7 12.09 0.00
 4 42 8 3.25 0.00
 4 42 9 -18.25 0.00
 4 44 0 3.62 0.00
 4 44 1 -0.63 0.00
 4 44 2 -1.51 0.00
 4 44 3 5.22 0.00
 4 44 4 -3.08 0.00
 4 44 5 -10.86 0.00
 4 44 6 1.15 0.00
 4 44 7 1.24 0.00
 4 44 8 0.26 0.00
 4 46 0 1.16 0.00
 4 46 1 4.08 0.00
 4 46 2 -0.32 0.00
 4 46 3 -12.17 0.00
 4 46 4 0.94 0.00
 4 46 5 10.70 0.00
 4 48 0 6.17 0.00
 4 48 1 -3.98 0.00
 4 48 2 2.63 0.00
 5 1 0 -5.88 0.00
 5 1 1 8.93 0.00
 5 1 2 -5.84 0.00
 5 1 3 -54.41 0.00
 5 1 4 -54.02 0.00
 5 1 5 2.58 0.00
 5 1 6 33.26 0.00
 5 1 7 -37.01 0.00
 5 1 8 15.06 0.00
 5 1 9 18.44 0.00
 5 1 10 2.74 0.00
 5 1 11 -6.56 0.00
 5 1 12 -13.19 0.00
 5 1 13 4.83 0.00
 5 1 14 3.28 0.00
 5 1 15 -11.77 0.00
 5 1 16 -0.50 0.00
 5 1 17 0.63 0.00
 5 1 18 -6.94 0.00
 5 1 19 -3.64 0.00
 5 3 0 -91.55 0.00
 5 3 1 3.64 0.00
 5 3 2 62.95 0.00
 5 3 3 -13.50 0.00
 5 3 4 18.94 0.00
 5 3 5 24.60 0.00
 5 3 6 4.30 0.00
 5 3 7 3.52 0.00
 5 3 8 -6.47 0.00
 5 3 9 7.30 0.00
 5 3 10 0.71 0.00
 5 3 11 -11.17 0.00
 5 3 12 -5.19 0.00
 5 3 13 -3.82 0.00
 5 3 14 5.03 0.00
 5 3 15 2.99 0.00
 5 3 16 -0.67 0.00
 5 3 17 6.43 0.00
 5 3 18 -1.34 0.00
 5 3 19 -7.37 0.00
 5 5 0 -82.50 0.00
 5 5 1 -65.26 0.00
 5 5 2 -40.62 0.00
 5 5 3 33.66 0.00
 5 5 4 -14.63 0.00
 5 5 5 -8.74 0.00
 5 5 6 -23.04 0.00
 5 5 7 16.85 0.00
 5 5 8 9.29 0.00
 5 5 9 -1.07 0.00
 5 5 10 2.29 0.00
 5 5 11 17.55 0.00
 5 5 12 2.02 0.00
 5 5 13 2.68 0.00
 5 5 14 0.44 0.00
 5 5 15 -12.77 0.00
 5 5 16 2.00 0.00
 5 5 17 -0.79 0.00
 5 5 18 -2.15 0.00
 5 5 19 6.10 0.00
 5 7 0 -85.30 0.00
 5 7 1 -104.31 0.00
 5 7 2 14.99 0.00
 5 7 3 12.00 0.00
 5 7 4 -0.18 0.00
 5 7 5 -15.02 0.00
 5 7 6 6.65 0.00
 5 7 7 0.94 0.00
 5 7 8 -2.36 0.00
 5 7 9 -8.29 0.00
 5 7 10 -4.17 0.00
 5 7 11 -12.73 0.00
 5 7 12 -1.82 0.00
 5 7 13 -12.00 0.00
 5 7 14 -0.57 0.00
 5 7 15 8.29 0.00
 5 7 16 -3.07 0.00
 5 7 17 -5.83 0.00
 5 7 18 -0.54 0.00
 5 7 19 -5.13 0.00
 5 9 0 22.25 0.00
 5 9 1 13.00 0.00
 5 9 2 -12.75 0.00
 5 9 3 12.32 0.00
 5 9 4 14.34 0.00
 5 9 5 -0.52 0.00
 5 9 6 -14.28 0.00
 5 9 7 12.99 0.00
 5 9 8 -2.38 0.00
 5 9 9 4.68 0.00
 5 9 10 4.36 0.00
 5 9 11 2.12 0.00
 5 9 12 4.39 0.00
 5 9 13 -2.64 0.00
 5 9 14 -0.76 0.00
 5 9 15 12.57 0.00
 5 9 16 -0.36 0.00
 5 9 17 -0.52 0.00
 5 9 18 2.73 0.00
 5 9 19 -3.02 0.00
 5 11 0 3.78 0.00
 5 11 1 -21.61 0.00
 5 11 2 3.90 0.00
 5 11 3 -32.26 0.00
 5 11 4 58.16 0.00
 5 11 5 24.02 0.00
 5 11 6 -10.57 0.00
 5 11 7 -5.85 0.00
 5 11 8 0.68 0.00
 5 11 9 -8.13 0.00
 5 11 10 -3.01 0.00
 5 11 11 4.16 0.00
 5 11 12 4.61 0.00
 5 11 13 -17.53 0.00
 5 11 14 -12.77 0.00
 5 11 15 22.32 0.00
 5 11 16 14.26 0.00
 5 11 17 -1.41 0.00
 5 11 18 -5.63 0.00
 5 11 19 2.31 0.00
 5 13 0 17.46 0.00
 5 13 1 32.68 0.00
 5 13 2 7.25 0.00
 5 13 3 5.99 0.00
 5 13 4 -27.08 0.00
 5 13 5 3.66 0.00
 5 13 6 10.35 0.00
 5 13 7 -16.87 0.00
 5 13 8 -3.84 0.00
 5 13 9 14.29 0.00
 5 13 10 -2.17 0.00
 5 13 11 -1.58 0.00
 5 13 12 -5.17 0.00
 5 13 13 -1.67 0.00
 5 13 14 -6.51 0.00
 5 13 15 -3.28 0.00
 5 13 16 -7.29 0.00
 5 13 17 0.81 0.00
 5 13 18 5.16 0.00
 5 15 0 -3.77 0.00
 5 15 1 13.87 0.00
 5 15 2 9.35 0.00
 5 15 3 -14.13 0.00
 5 15 4 23.59 0.00
 5 15 5 9.83 0.00
 5 15 6 46.05 0.00
 5 15 7 13.59 0.00
 5 15 8 -10.53 0.00
 5 15 9 -14.89 0.00
 5 15 10 8.31 0.00
 5 15 11 0.03 0.00
 5 15 12 -4.63 0.00
 5 15 13 12.36 0.00
 5 15 14 6.39 0.00
 5 15 15 -0.59 0.00
 5 15 16 1.65 0.00
 5 15 17 7.08 0.00
 5 15 18 -4.84 0.00
 5 17 0 -6.25 0.00
 5 17 1 12.96 0.00
 5 17 2 -17.72 0.00
 5 17 3 18.21 0.00
 5 17 4 -20.43 0.00
 5 17 5 -6.41 0.00
 5 17 6 -25.60 0.00
 5 17 7 -8.74 0.00
 5 17 8 1.60 0.00
 5 17 9 0.18 0.00
 5 17 10 3.74 0.00
 5 17 11 4.47 0.00
 5 17 12 -4.91 0.00
 5 17 13 -7.03 0.00
 5 17 14 -3.27 0.00
 5 17 15 6.80 0.00
 5 17 16 -1.39 0.00
 5 17 17 -2.04 0.00
 5 17 18 0.88 0.00
 5 19 0 6.78 0.00
 5 19 1 6.59 0.00
 5 19 2 -5.08 0.00
 5 19 3 7.03 0.00
 5 19 4 10.56 0.00
 5 19 5 -9.76 0.00
 5 19 6 22.97 0.00
 5 19 7 0.26 0.00
 5 19 8 12.70 0.00
 5 19 9 -5.36 0.00
 5 19 10 -23.77 0.00
 5 19 11 1.31 0.00
 5 19 12 3.29 0.00
 5 19 13 5.52 0.00
 5 19 14 0.05 0.00
 5 19 15 1.81 0.00
 5 19 16 -3.76 0.00
 5 19 17 -3.22 0.00
 5 21 0 9.39 0.00
 5 21 1 0.88 0.00
 5 21 2 0.87 0.00
 5 21 3 10.31 0.00
 5 21 4 -5.03 0.00
 5 21 5 5.83 0.00
 5 21 6 -9.13 0.00
 5 21 7 5.53 0.00
 5 21 8 -1.81 0.00
 5 21 9 -2.57 0.00
 5 21 10 4.00 0.00
 5 21 11 -5.89 0.00
 5 21 12 -2.54 0.00
 5 21 13 -2.66 0.00
 5 21 14 7.18 0.00
 5 21 15 -6.77 0.00
 5 21 16 6.59 0.00
 5 21 17 5.11 0.00
 5 23 0 0.26 0.00
 5 23 1 7.18 0.00
 5 23 2 -8.55 0.00
 5 23 3 6.08 0.00
 5 23 4 3.85 0.00
 5 23 5 1.18 0.00
 5 23 6 -4.34 0.00
 5 23 7 -4.98 0.00
 5 23 8 10.18 0.00
 5 23 9 -1.26 0.00
 5 23 10 0.52 0.00
 5 23 11 1.14 0.00
 5 23 12 -5.79 0.00
 5 23 13 -8.19 0.00
 5 23 14 4.12 0.00
 5 23 15 6.89 0.00
 5 23 16 -17.93 0.00
 5 23 17 -14.28 0.00
 5 25 0 6.65 0.00
 5 25 1 4.94 0.00
 5 25 2 3.28 0.00
 5 25 3 -1.95 0.00
 5 25 4 4.22 0.00
 5 25 5 -1.77 0.00
 5 25 6 12.56 0.00
 5 25 7 7.29 0.00
 5 25 8 -13.58 0.00
 5 25 9 -2.68 0.00
 5 25 10 -3.83 0.00
 5 25 11 0.96 0.00
 5 25 12 2.77 0.00
 5 25 13 -8.70 0.00
 5 25 14 -4.95 0.00
 5 25 15 -4.71 0.00
 5 25 16 6.89 0.00
 5 27 0 -12.93 0.00
 5 27 1 2.54 0.00
 5 27 2 10.21 0.00
 5 27 3 2.53 0.00
 5 27 4 -8.05 0.00
 5 27 5 1.34 0.00
 5 27 6 12.07 0.00
 5 27 7 -2.50 0.00
 5 27 8 3.85 0.00
 5 27 9 4.99 0.00
 5 27 10 4.89 0.00
 5 27 11 -3.18 0.00
 5 27 12 -1.00 0.00
 5 27 13 -0.47 0.00
 5 27 14 15.40 0.00
 5 27 15 9.40 0.00
 5 27 16 -4.85 0.00
 5 29 0 -1.27 0.00
 5 29 1 -2.25 0.00
 5 29 2 3.46 0.00
 5 29 3 -0.81 0.00
 5 29 4 -2.74 0.00
 5 29 5 -0.12 0.00
 5 29 6 0.11 0.00
 5 29 7 -5.69 0.00
 5 29 8 -4.01 0.00
 5 29 9 -2.99 0.00
 5 29 10 -0.96 0.00
 5 29 11 -4.55 0.00
 5 29 12 -11.19 0.00
 5 29 13 2.20 0.00
 5 29 14 7.00 0.00
 5 29 15 -2.33 0.00
 5 31 0 1.13 0.00
 5 31 1 6.79 0.00
 5 31 2 -1.18 0.00
 5 31 3 -5.02 0.00
 5 31 4 2.21 0.00
 5 31 5 -1.69 0.00
 5 31 6 -2.48 0.00
 5 31 7 -0.59 0.00
 5 31 8 -1.19 0.00
 5 31 9 -1.90 0.00
 5 31 10 5.79 0.00
 5 31 11 1.61 0.00
 5 31 12 13.43 0.00
 5 31 13 0.26 0.00
 5 31 14 -3.29 0.00
 5 33 0 -0.33 0.00
 5 33 1 3.16 0.00
 5 33 2 8.32 0.00
 5 33 3 -0.46 0.00
 5 33 4 -0.12 0.00
 5 33 5 0.70 0.00
 5 33 6 2.27 0.00
 5 33 7 -3.08 0.00
 5 33 8 3.19 0.00
 5 33 9 -5.21 0.00
 5 33 10 -11.02 0.00
 5 33 11 -2.76 0.00
 5 33 12 -0.65 0.00
 5 33 13 1.91 0.00
 5 33 14 6.77 0.00
 5 35 0 6.93 0.00
 5 35 1 2.22 0.00
 5 35 2 -17.13 0.00
 5 35 3 -0.37 0.00
 5 35 4 -4.33 0.00
 5 35 5 -1.52 0.00
 5 35 6 -1.44 0.00
 5 35 7 0.38 0.00
 5 35 8 -4.67 0.00
 5 35 9 11.90 0.00
 5 35 10 15.21 0.00
 5 35 11 -7.59 0.00
 5 35 12 1.15 0.00
 5 35 13 0.48 0.00
 5 37 0 -8.13 0.00
 5 37 1 -0.67 0.00
 5 37 2 9.81 0.00
 5 37 3 -1.57 0.00
 5 37 4 0.62 0.00
 5 37 5 -3.79 0.00
 5 37 6 4.06 0.00
 5 37 7 -7.13 0.00
 5 37 8 -4.54 0.00
 5 37 9 11.40 0.00
 5 37 10 1.56 0.00
 5 37 11 -13.54 0.00
 5 37 12 2.48 0.00
 5 39 0 -2.49 0.00
 5 39 1 -2.24 0.00
 5 39 2 -1.89 0.00
 5 39 3 1.84 0.00
 5 39 4 -0.96 0.00
 5 39 5 2.64 0.00
 5 39 6 -1.45 0.00
 5 39 7 4.57 0.00
 5 39 8 3.26 0.00
 5 39 9 2.85 0.00
 5 39 10 3.37 0.00
 5 41 0 15.55 0.00
 5 41 1 -0.84 0.00
 5 41 2 -14.37 0.00
 5 41 3 -0.10 0.00
 5 41 4 8.72 0.00
 5 41 5 -10.62 0.00
 5 41 6 -7.34 0.00
 5 41 7 4.62 0.00
 5 41 8 16.10 0.00
 5 41 9 -8.22 0.00
 5 43 0 2.30 0.00
 5 43 1 -2.75 0.00
 5 43 2 -1.70 0.00
 5 43 3 -6.37 0.00
 5 43 4 8.18 0.00
 5 43 5 3.61 0.00
 5 43 6 -0.83 0.00
 5 43 7 -5.54 0.00
 5 43 8 10.61 0.00
 5 45 0 8.25 0.00
 5 45 1 -0.22 0.00
 5 45 2 -3.23 0.00
 5 45 3 -4.57 0.00
 5 45 4 -7.82 0.00
 5 45 5 9.61 0.00
 5 45 6 4.01 0.00
 5 47 0 3.50 0.00
 5 47 1 -4.85 0.00
 5 47 2 -1.26 0.00
 5 47 3 2.62 0.00
 5 47 4 3.61 0.00
 6 0 0 84.19 0.00
 6 0 2 53.59 0.00
 6 0 4 51.89 0.00
 6 0 6 -8.35 0.00
 6 0 8 1.07 0.00
 6 0 10 -19.25 0.00
 6 0 12 10.81 0.00
 6 0 14 0.74 0.00
 6 0 16 0.03 0.00
 6 0 18 2.97 0.00
 6 2 0 -11.46 0.00
 6 2 1 -51.98 0.00
 6 2 2 73.87 0.00
 6 2 3 24.85 0.00
 6 2 4 -52.07 0.00
 6 2 5 15.73 0.00
 6 2 6 -5.40 0.00
 6 2 7 24.40 0.00
 6 2 8 10.02 0.00
 6 2 9 8.49 0.00
 6 2 10 2.41 0.00
 6 2 11 -13.31 0.00
 6 2 12 10.22 0.00
 6 2 13 4.07 0.00
 6 2 14 4.32 0.00
 6 2 15 2.84 0.00
 6 2 16 1.43 0.00
 6 2 17 2.86 0.00
 6 2 18 -7.01 0.00
 6 2 19 -1.08 0.00
 6 4 0 -53.46 0.00
 6 4 1 -44.11 0.00
 6 4 2 12.81 0.00
 6 4 3 60.80 0.00
 6 4 4 4.54 0.00
 6 4 5 -44.88 0.00
 6 4 6 9.56 0.00
 6 4 7 -31.66 0.00
 6 4 8 -11.44 0.00
 6 4 9 -13.15 0.00
 6 4 10 -0.35 0.00
 6 4 11 5.08 0.00
 6 4 12 -0.09 0.00
 6 4 13 -1.67 0.00
 6 4 14 6.54 0.00
 6 4 15 0.81 0.00
 6 4 16 -7.92 0.00
 6 4 17 4.30 0.00
 6 4 18 -3.08 0.00
 6 4 19 -0.02 0.00
 6 6 0 -36.50 0.00
 6 6 1 25.57 0.00
 6 6 2 -22.16 0.00
 6 6 3 -39.18 0.00
 6 6 4 -3.73 0.00
 6 6 5 -0.69 0.00
 6 6 6 -37.37 0.00
 6 6 7 19.80 0.00
 6 6 8 32.23 0.00
 6 6 9 12.28 0.00
 6 6 10 5.00 0.00
 6 6 11 -3.48 0.00
 6 6 12 -7.71 0.00
 6 6 13 0.28 0.00
 6 6 14 6.93 0.00
 6 6 15 6.24 0.00
 6 6 16 1.43 0.00
 6 6 17 -3.19 0.00
 6 6 18 -4.67 0.00
 6 6 19 -2.62 0.00
 6 8 0 -62.95 0.00
 6 8 1 2.42 0.00
 6 8 2 2.08 0.00
 6 8 3 13.64 0.00
 6 8 4 -38.59 0.00
 6 8 5 -12.40 0.00
 6 8 6 9.33 0.00
 6 8 7 -11.11 0.00
 6 8 8 -0.47 0.00
 6 8 9 2.65 0.00
 6 8 10 -2.90 0.00
 6 8 11 -4.41 0.00
 6 8 12 4.88 0.00
 6 8 13 11.56 0.00
 6 8 14 -4.08 0.00
 6 8 15 -5.67 0.00
 6 8 16 -5.23 0.00
 6 8 17 5.63 0.00
 6 8 18 5.43 0.00
 6 8 19 -2.49 0.00
 6 10 0 16.18 0.00
 6 10 1 -21.77 0.00
 6 10 2 -30.98 0.00
 6 10 3 -0.93 0.00
 6 10 4 2.44 0.00
 6 10 5 -9.79 0.00
 6 10 6 0.51 0.00
 6 10 7 -9.68 0.00
 6 10 8 -1.69 0.00
 6 10 9 -1.38 0.00
 6 10 10 7.45 0.00
 6 10 11 -14.99 0.00
 6 10 12 -7.97 0.00
 6 10 13 4.08 0.00
 6 10 14 -1.47 0.00
 6 10 15 -3.56 0.00
 6 10 16 -3.84 0.00
 6 10 17 -3.38 0.00
 6 10 18 -5.19 0.00
 6 10 19 -2.34 0.00
 6 12 0 5.67 0.00
 6 12 1 26.10 0.00
 6 12 2 -2.32 0.00
 6 12 3 -9.40 0.00
 6 12 4 16.36 0.00
 6 12 5 -2.62 0.00
 6 12 6 -24.26 0.00
 6 12 7 -8.53 0.00
 6 12 8 -2.59 0.00
 6 12 9 9.82 0.00
 6 12 10 3.65 0.00
 6 12 11 8.28 0.00
 6 12 12 5.77 0.00
 6 12 13 1.49 0.00
 6 12 14 -0.26 0.00
 6 12 15 2.35 0.00
 6 12 16 8.01 0.00
 6 12 17 -13.85 0.00
 6 12 18 -12.60 0.00
 6 14 0 -2.59 0.00
 6 14 1 -20.90 0.00
 6 14 2 -18.43 0.00
 6 14 3 -9.78 0.00
 6 14 4 -11.33 0.00
 6 14 5 23.82 0.00
 6 14 6 9.47 0.00
 6 14 7 19.74 0.00
 6 14 8 -2.27 0.00
 6 14 9 -4.13 0.00
 6 14 10 -8.84 0.00
 6 14 11 -13.17 0.00
 6 14 12 -2.60 0.00
 6 14 13 -1.54 0.00
 6 14 14 -9.57 0.00
 6 14 15 -13.63 0.00
 6 14 16 0.52 0.00
 6 14 17 13.20 0.00
 6 14 18 4.06 0.00
 6 16 0 -5.54 0.00
 6 16 1 -7.61 0.00
 6 16 2 17.43 0.00
 6 16 3 8.72 0.00
 6 16 4 -9.97 0.00
 6 16 5 -14.52 0.00
 6 16 6 -6.05 0.00
 6 16 7 -8.49 0.00
 6 16 8 -1.66 0.00
 6 16 9 -11.50 0.00
 6 16 10 -0.58 0.00
 6 16 11 9.05 0.00
 6 16 12 6.30 0.00
 6 16 13 2.50 0.00
 6 16 14 -1.14 0.00
 6 16 15 2.84 0.00
 6 16 16 -2.75 0.00
 6 16 17 -5.21 0.00
 6 16 18 -0.97 0.00
 6 18 0 -19.02 0.00
 6 18 1 -8.94 0.00
 6 18 2 -9.98 0.00
 6 18 3 -7.36 0.00
 6 18 4 -16.23 0.00
 6 18 5 7.60 0.00
 6 18 6 4.82 0.00
 6 18 7 17.83 0.00
 6 18 8 -5.16 0.00
 6 18 9 14.38 0.00
 6 18 10 8.16 0.00
 6 18 11 -3.94 0.00
 6 18 12 -4.13 0.00
 6 18 13 2.19 0.00
 6 18 14 -4.97 0.00
 6 18 15 -10.07 0.00
 6 18 16 -0.10 0.00
 6 18 17 4.44 0.00
 6 18 18 2.76 0.00
 6 20 0 10.14 0.00
 6 20 1 -14.78 0.00
 6 20 2 -11.37 0.00
 6 20 3 10.44 0.00
 6 20 4 1.50 0.00
 6 20 5 4.60 0.00
 6 20 6 0.98 0.00
 6 20 7 -13.55 0.00
 6 20 8 -9.10 0.00
 6 20 9 -9.22 0.00
 6 20 10 -0.20 0.00
 6 20 11 2.14 0.00
 6 20 12 -6.67 0.00
 6 20 13 3.81 0.00
 6 20 14 -1.03 0.00
 6 20 15 -3.84 0.00
 6 20 16 3.48 0.00
 6 20 17 3.85 0.00
 6 22 0 -8.50 0.00
 6 22 1 -0.95 0.00
 6 22 2 2.47 0.00
 6 22 3 -11.72 0.00
 6 22 4 -0.68 0.00
 6 22 5 -4.66 0.00
 6 22 6 0.59 0.00
 6 22 7 -0.81 0.00
 6 22 8 13.12 0.00
 6 22 9 1.60 0.00
 6 22 10 -4.17 0.00
 6 22 11 3.10 0.00
 6 22 12 -9.44 0.00
 6 22 13 -2.07 0.00
 6 22 14 -5.89 0.00
 6 22 15 -0.11 0.00
 6 22 16 12.45 0.00
 6 22 17 -15.04 0.00
 6 24 0 -4.39 0.00
 6 24 1 6.43 0.00
 6 24 2 1.20 0.00
 6 24 3 0.37 0.00
 6 24 4 -5.71 0.00
 6 24 5 14.43 0.00
 6 24 6 -3.13 0.00
 6 24 7 20.27 0.00
 6 24 8 -2.94 0.00
 6 24 9 2.55 0.00
 6 24 10 0.31 0.00
 6 24 11 -1.14 0.00
 6 24 12 -2.94 0.00
 6 24 13 0.28 0.00
 6 24 14 1.32 0.00
 6 24 15 -18.36 0.00
 6 24 16 6.59 0.00
 6 26 0 3.86 0.00
 6 26 1 0.74 0.00
 6 26 2 -6.71 0.00
 6 26 3 -7.06 0.00
 6 26 4 7.48 0.00
 6 26 5 -2.41 0.00
 6 26 6 -4.43 0.00
 6 26 7 -11.78 0.00
 6 26 8 6.52 0.00
 6 26 9 3.57 0.00
 6 26 10 -1.06 0.00
 6 26 11 -2.95 0.00
 6 26 12 0.82 0.00
 6 26 13 -4.53 0.00
 6 26 14 5.50 0.00
 6 26 15 8.81 0.00
 6 26 16 -2.08 0.00
 6 28 0 3.91 0.00
 6 28 1 11.05 0.00
 6 28 2 -1.59 0.00
 6 28 3 -8.89 0.00
 6 28 4 3.28 0.00
 6 28 5 11.17 0.00
 6 28 6 1.02 0.00
 6 28 7 7.14 0.00
 6 28 8 7.39 0.00
 6 28 9 -6.20 0.00
 6 28 10 0.04 0.00
 6 28 11 4.16 0.00
 6 28 12 -0.88 0.00
 6 28 13 -0.64 0.00
 6 28 14 -0.37 0.00
 6 28 15 1.29 0.00
 6 30 0 1.20 0.00
 6 30 1 -11.42 0.00
 6 30 2 -0.08 0.00
 6 30 3 7.86 0.00
 6 30 4 0.99 0.00
 6 30 5 1.22 0.00
 6 30 6 1.33 0.00
 6 30 7 9.78 0.00
 6 30 8 0.55 0.00
 6 30 9 -4.71 0.00
 6 30 10 3.15 0.00
 6 30 11 6.49 0.00
 6 30 12 6.37 0.00
 6 30 13 -7.00 0.00
 6 30 14 3.40 0.00
 6 30 15 1.05 0.00
 6 32 0 0.48 0.00
 6 32 1 1.21 0.00
 6 32 2 1.81 0.00
 6 32 3 -2.48 0.00
 6 32 4 7.96 0.00
 6 32 5 -0.25 0.00
 6 32 6 -4.88 0.00
 6 32 7 -0.31 0.00
 6 32 8 9.00 0.00
 6 32 9 6.61 0.00
 6 32 10 -2.05 0.00
 6 32 11 -6.67 0.00
 6 32 12 -0.46 0.00
 6 32 13 0.63 0.00
 6 32 14 -4.09 0.00
 6 34 0 1.77 0.00
 6 34 1 5.19 0.00
 6 34 2 -3.28 0.00
 6 34 3 -4.19 0.00
 6 34 4 -5.04 0.00
 6 34 5 2.67 0.00
 6 34 6 4.01 0.00
 6 34 7 -0.22 0.00
 6 34 8 0.83 0.00
 6 34 9 -3.55 0.00
 6 34 10 7.20 0.00
 6 34 11 3.69 0.00
 6 34 12 -1.50 0.00
 6 34 13 0.81 0.00
 6 36 0 -5.29 0.00
 6 36 1 -17.25 0.00
 6 36 2 7.05 0.00
 6 36 3 13.42 0.00
 6 36 4 1.04 0.00
 6 36 5 5.00 0.00
 6 36 6 8.80 0.00
 6 36 7 3.59 0.00
 6 36 8 1.03 0.00
 6 36 9 10.01 0.00
 6 36 10 -5.99 0.00
 6 36 11 2.79 0.00
 6 36 12 -3.63 0.00
 6 38 0 -6.14 0.00
 6 38 1 -0.59 0.00
 6 38 2 0.41 0.00
 6 38 3 -5.52 0.00
 6 38 4 -1.24 0.00
 6 38 5 2.17 0.00
 6 38 6 -1.46 0.00
 6 38 7 -0.32 0.00
 6 38 8 1.75 0.00
 6 38 9 -0.13 0.00
 6 38 10 2.94 0.00
 6 38 11 -1.00 0.00
 6 40 0 1.27 0.00
 6 40 1 3.62 0.00
 6 40 2 -1.90 0.00
 6 40 3 -1.94 0.00
 6 40 4 4.09 0.00
 6 40 5 -0.59 0.00
 6 40 6 -3.53 0.00
 6 40 7 3.34 0.00
 6 40 8 -10.23 0.00
 6 40 9 0.87 0.00
 6 42 0 0.85 0.00
 6 42 1 -23.52 0.00
 6 42 2 -1.45 0.00
 6 42 3 10.90 0.00
 6 42 4 2.37 0.00
 6 42 5 4.15 0.00
 6 42 6 -4.25 0.00
 6 42 7 11.68 0.00
 6 42 8 12.13 0.00
 6 44 0 -1.16 0.00
 6 44 1 2.30 0.00
 6 44 2 1.23 0.00
 6 44 3 -5.33 0.00
 6 44 4 -3.33 0.00
 6 44 5 5.97 0.00
 6 44 6 -3.87 0.00
 6 44 7 -1.92 0.00
 6 46 0 -1.92 0.00
 6 46 1 6.53 0.00
 6 46 2 10.94 0.00
 6 46 3 -7.42 0.00
 6 46 4 -9.88 0.00
 7 1 0 2.98 0.00
 7 1 1 6.39 0.00
 7 1 2 -1.27 0.00
 7 1 3 -4.62 0.00
 7 1 4 -51.81 0.00
 7 1 5 -48.17 0.00
 7 1 6 18.28 0.00
 7 1 7 -16.44 0.00
 7 1 8 22.35 0.00
 7 1 9 -8.84 0.00
 7 1 10 -1.49 0.00
 7 1 11 -15.79 0.00
 7 1 12 -4.01 0.00
 7 1 13 -5.27 0.00
 7 1 14 2.33 0.00
 7 1 15 1.96 0.00
 7 1 16 4.66 0.00
 7 1 17 -3.96 0.00
 7 1 18 -9.03 0.00
 7 1 19 -0.21 0.00
 7 3 0 -41.90 0.00
 7 3 1 26.07 0.00
 7 3 2 -2.66 0.00
 7 3 3 -9.88 0.00
 7 3 4 -25.51 0.00
 7 3 5 23.79 0.00
 7 3 6 22.19 0.00
 7 3 7 39.91 0.00
 7 3 8 -16.04 0.00
 7 3 9 11.09 0.00
 7 3 10 -0.86 0.00
 7 3 11 -3.39 0.00
 7 3 12 -12.54 0.00
 7 3 13 3.44 0.00
 7 3 14 0.13 0.00
 7 3 15 1.75 0.00
 7 3 16 -2.32 0.00
 7 3 17 -1.74 0.00
 7 3 18 -3.03 0.00
 7 3 19 -2.19 0.00
 7 5 0 -1.62 0.00
 7 5 1 29.73 0.00
 7 5 2 -28.41 0.00
 7 5 3 -2.40 0.00
 7 5 4 4.34 0.00
 7 5 5 1.47 0.00
 7 5 6 -23.33 0.00
 7 5 7 -25.92 0.00
 7 5 8 19.68 0.00
 7 5 9 4.02 0.00
 7 5 10 4.87 0.00
 7 5 11 8.09 0.00
 7 5 12 0.87 0.00
 7 5 13 -5.24 0.00
 7 5 14 3.69 0.00
 7 5 15 5.21 0.00
 7 5 16 10.53 0.00
 7 5 17 5.59 0.00
 7 5 18 -1.42 0.00
 7 5 19 1.67 0.00
 7 7 0 -64.69 0.00
 7 7 1 0.54 0.00
 7 7 2 -39.31 0.00
 7 7 3 -19.34 0.00
 7 7 4 -0.22 0.00
 7 7 5 -7.37 0.00
 7 7 6 -6.39 0.00
 7 7 7 11.15 0.00
 7 7 8 3.05 0.00
 7 7 9 -1.96 0.00
 7 7 10 -18.87 0.00
 7 7 11 -10.13 0.00
 7 7 12 8.56 0.00
 7 7 13 -1.39 0.00
 7 7 14 -16.88 0.00
 7 7 15 -6.77 0.00
 7 7 16 0.34 0.00
 7 7 17 -5.14 0.00
 7 7 18 0.63 0.00
 7 7 19 2.65 0.00
 7 9 0 -14.29 0.00
 7 9 1 -50.14 0.00
 7 9 2 32.62 0.00
 7 9 3 18.20 0.00
 7 9 4 19.66 0.00
 7 9 5 -7.63 0.00
 7 9 6 15.81 0.00
 7 9 7 6.26 0.00
 7 9 8 3.65 0.00
 7 9 9 -3.23 0.00
 7 9 10 0.06 0.00
 7 9 11 9.64 0.00
 7 9 12 -5.79 0.00
 7 9 13 -6.46 0.00
 7 9 14 1.62 0.00
 7 9 15 12.51 0.00
 7 9 16 -0.78 0.00
 7 9 17 -0.64 0.00
 7 9 18 1.22 0.00
 7 9 19 -1.29 0.00
 7 11 0 -27.77 0.00
 7 11 1 7.66 0.00
 7 11 2 -9.03 0.00
 7 11 3 -2.05 0.00
 7 11 4 12.89 0.00
 7 11 5 22.04 0.00
 7 11 6 -18.88 0.00
 7 11 7 -21.39 0.00
 7 11 8 -12.87 0.00
 7 11 9 7.43 0.00
 7 11 10 7.02 0.00
 7 11 11 -1.05 0.00
 7 11 12 -4.36 0.00
 7 11 13 -5.89 0.00
 7 11 14 0.74 0.00
 7 11 15 5.98 0.00
 7 11 16 0.88 0.00
 7 11 17 3.60 0.00
 7 11 18 -1.63 0.00
 7 13 0 -19.59 0.00
 7 13 1 -25.83 0.00
 7 13 2 28.85 0.00
 7 13 3 -6.56 0.00
 7 13 4 13.39 0.00
 7 13 5 0.75 0.00
 7 13 6 25.96 0.00
 7 13 7 -7.98 0.00
 7 13 8 10.98 0.00
 7 13 9 -2.72 0.00
 7 13 10 0.47 0.00
 7 13 11 2.28 0.00
 7 13 12 -1.87 0.00
 7 13 13 -6.02 0.00
 7 13 14 -15.07 0.00
 7 13 15 -5.85 0.00
 7 13 16 -2.73 0.00
 7 13 17 -2.18 0.00
 7 13 18 3.98 0.00
 7 15 0 -27.40 0.00
 7 15 1 15.39 0.00
 7 15 2 8.34 0.00
 7 15 3 16.78 0.00
 7 15 4 -20.03 0.00
 7 15 5 1.52 0.00
 7 15 6 0.96 0.00
 7 15 7 12.74 0.00
 7 15 8 -14.63 0.00
 7 15 9 -1.82 0.00
 7 15 10 -1.75 0.00
 7 15 11 9.55 0.00
 7 15 12 0.65 0.00
 7 15 13 -1.82 0.00
 7 15 14 8.48 0.00
 7 15 15 10.40 0.00
 7 15 16 0.40 0.00
 7 15 17 2.31 0.00
 7 15 18 -4.11 0.00
 7 17 0 -9.40 0.00
 7 17 1 17.84 0.00
 7 17 2 -6.01 0.00
 7 17 3 -10.53 0.00
 7 17 4 -3.20 0.00
 7 17 5 -8.60 0.00
 7 17 6 18.82 0.00
 7 17 7 -4.06 0.00
 7 17 8 1.54 0.00
 7 17 9 -10.52 0.00
 7 17 10 1.71 0.00
 7 17 11 -1.22 0.00
 7 17 12 -1.85 0.00
 7 17 13 0.95 0.00
 7 17 14 -7.28 0.00
 7 17 15 -1.13 0.00
 7 17 16 -6.56 0.00
 7 17 17 -3.55 0.00
 7 19 0 14.71 0.00
 7 19 1 -14.49 0.00
 7 19 2 -13.99 0.00
 7 19 3 4.62 0.00
 7 19 4 7.22 0.00
 7 19 5 5.53 0.00
 7 19 6 -17.20 0.00
 7 19 7 -4.16 0.00
 7 19 8 -7.50 0.00
 7 19 9 8.44 0.00
 7 19 10 -14.41 0.00
 7 19 11 4.53 0.00
 7 19 12 1.96 0.00
 7 19 13 8.30 0.00
 7 19 14 6.31 0.00
 7 19 15 -8.70 0.00
 7 19 16 1.85 0.00
 7 19 17 11.82 0.00
 7 21 0 17.95 0.00
 7 21 1 10.57 0.00
 7 21 2 -11.46 0.00
 7 21 3 1.25 0.00
 7 21 4 10.25 0.00
 7 21 5 5.43 0.00
 7 21 6 -3.19 0.00
 7 21 7 -4.72 0.00
 7 21 8 13.47 0.00
 7 21 9 1.07 0.00
 7 21 10 -7.51 0.00
 7 21 11 8.52 0.00
 7 21 12 -0.26 0.00
 7 21 13 -3.07 0.00
 7 21 14 1.86 0.00
 7 21 15 -14.34 0.00
 7 21 16 1.09 0.00
 7 21 17 -3.55 0.00
 7 23 0 -5.76 0.00
 7 23 1 6.98 0.00
 7 23 2 -2.48 0.00
 7 23 3 -1.53 0.00
 7 23 4 -8.45 0.00
 7 23 5 -2.10 0.00
 7 23 6 2.44 0.00
 7 23 7 4.28 0.00
 7 23 8 -12.69 0.00
 7 23 9 -4.27 0.00
 7 23 10 2.37 0.00
 7 23 11 -3.02 0.00
 7 23 12 1.22 0.00
 7 23 13 0.35 0.00
 7 23 14 10.30 0.00
 7 23 15 -2.44 0.00
 7 23 16 1.29 0.00
 7 25 0 -2.52 0.00
 7 25 1 -6.70 0.00
 7 25 2 6.66 0.00
 7 25 3 11.41 0.00
 7 25 4 15.50 0.00
 7 25 5 -5.89 0.00
 7 25 6 3.75 0.00
 7 25 7 4.08 0.00
 7 25 8 -3.13 0.00
 7 25 9 0.27 0.00
 7 25 10 2.67 0.00
 7 25 11 -2.17 0.00
 7 25 12 -2.38 0.00
 7 25 13 -0.39 0.00
 7 25 14 -10.39 0.00
 7 25 15 1.62 0.00
 7 25 16 3.80 0.00
 7 27 0 4.20 0.00
 7 27 1 0.46 0.00
 7 27 2 -3.52 0.00
 7 27 3 1.28 0.00
 7 27 4 8.16 0.00
 7 27 5 -3.72 0.00
 7 27 6 0.60 0.00
 7 27 7 8.12 0.00
 7 27 8 -1.09 0.00
 7 27 9 -0.73 0.00
 7 27 10 -7.69 0.00
 7 27 11 8.65 0.00
 7 27 12 3.20 0.00
 7 27 13 -0.49 0.00
 7 27 14 6.86 0.00
 7 27 15 -8.70 0.00
 7 29 0 -6.61 0.00
 7 29 1 0.37 0.00
 7 29 2 -7.24 0.00
 7 29 3 -0.54 0.00
 7 29 4 -7.09 0.00
 7 29 5 -4.66 0.00
 7 29 6 5.60 0.00
 7 29 7 -5.43 0.00
 7 29 8 -3.02 0.00
 7 29 9 -6.36 0.00
 7 29 10 7.92 0.00
 7 29 11 -2.20 0.00
 7 29 12 3.61 0.00
 7 29 13 -0.80 0.00
 7 29 14 0.10 0.00
 7 29 15 1.04 0.00
 7 31 0 0.68 0.00
 7 31 1 7.93 0.00
 7 31 2 22.99 0.00
 7 31 3 5.49 0.00
 7 31 4 -0.50 0.00
 7 31 5 -3.95 0.00
 7 31 6 -1.80 0.00
 7 31 7 -3.51 0.00
 7 31 8 -0.25 0.00
 7 31 9 4.02 0.00
 7 31 10 -7.17 0.00
 7 31 11 -7.53 0.00
 7 31 12 -3.96 0.00
 7 31 13 -0.59 0.00
 7 31 14 2.75 0.00
 7 33 0 -1.30 0.00
 7 33 1 16.87 0.00
 7 33 2 -13.43 0.00
 7 33 3 -7.81 0.00
 7 33 4 -2.88 0.00
 7 33 5 -2.79 0.00
 7 33 6 -1.31 0.00
 7 33 7 -7.44 0.00
 7 33 8 -1.84 0.00
 7 33 9 1.35 0.00
 7 33 10 3.35 0.00
 7 33 11 -5.69 0.00
 7 33 12 8.92 0.00
 7 33 13 2.87 0.00
 7 35 0 10.68 0.00
 7 35 1 -5.19 0.00
 7 35 2 -5.45 0.00
 7 35 3 2.48 0.00
 7 35 4 -0.80 0.00
 7 35 5 4.55 0.00
 7 35 6 5.05 0.00
 7 35 7 0.07 0.00
 7 35 8 -0.01 0.00
 7 35 9 2.42 0.00
 7 35 10 -2.74 0.00
 7 35 11 -6.05 0.00
 7 35 12 -3.49 0.00
 7 37 0 -0.84 0.00
 7 37 1 3.38 0.00
 7 37 2 0.51 0.00
 7 37 3 -2.45 0.00
 7 37 4 -4.73 0.00
 7 37 5 -7.66 0.00
 7 37 6 -2.29 0.00
 7 37 7 6.49 0.00
 7 37 8 3.46 0.00
 7 37 9 -4.18 0.00
 7 37 10 -2.07 0.00
 7 37 11 2.83 0.00
 7 39 0 4.14 0.00
 7 39 1 -3.72 0.00
 7 39 2 -3.17 0.00
 7 39 3 2.06 0.00
 7 39 4 -1.51 0.00
 7 39 5 -2.73 0.00
 7 39 6 -1.85 0.00
 7 39 7 -0.62 0.00
 7 39 8 -3.35 0.00
 7 39 9 11.58 0.00
 7 39 10 -2.24 0.00
 7 41 0 13.01 0.00
 7 41 1 -1.33 0.00
 7 41 2 -14.70 0.00
 7 41 3 3.15 0.00
 7 41 4 2.50 0.00
 7 41 5 -5.20 0.00
 7 41 6 2.45 0.00
 7 41 7 -7.15 0.00
 7 41 8 13.55 0.00
 7 43 0 19.95 0.00
 7 43 1 7.88 0.00
 7 43 2 -8.69 0.00
 7 43 3 -7.47 0.00
 7 43 4 9.04 0.00
 7 43 5 -0.81 0.00
 7 43 6 -10.65 0.00
 7 43 7 -1.78 0.00
 7 45 0 2.87 0.00
 7 45 1 -2.42 0.00
 7 45 2 -2.96 0.00
 7 45 3 1.35 0.00
 7 45 4 0.19 0.00
 7 45 5 5.86 0.00
 7 47 2 8.50 0.00
 8 0 0 27.04 0.00
 8 0 2 83.97 0.00
 8 0 4 0.56 0.00
 8 0 6 2.92 0.00
 8 0 8 -12.17 0.00
 8 0 10 -7.64 0.00
 8 0 12 -0.19 0.00
 8 0 14 -2.15 0.00
 8 0 16 6.95 0.00
 8 0 18 -2.88 0.00
 8 2 0 31.26 0.00
 8 2 1 -5.56 0.00
 8 2 2 -27.14 0.00
 8 2 3 13.51 0.00
 8 2 4 -1.14 0.00
 8 2 5 16.51 0.00
 8 2 6 -18.40 0.00
 8 2 7 6.44 0.00
 8 2 8 22.64 0.00
 8 2 9 -3.26 0.00
 8 2 10 -0.20 0.00
 8 2 11 9.48 0.00
 8 2 12 6.48 0.00
 8 2 13 -2.70 0.00
 8 2 14 -0.44 0.00
 8 2 15 3.95 0.00
 8 2 16 3.33 0.00
 8 2 17 1.92 0.00
 8 2 18 3.59 0.00
 8 2 19 6.56 0.00
 8 4 0 -0.43 0.00
 8 4 1 27.43 0.00
 8 4 2 -17.45 0.00
 8 4 3 -49.66 0.00
 8 4 4 15.31 0.00
 8 4 5 6.26 0.00
 8 4 6 -16.90 0.00
 8 4 7 -9.49 0.00
 8 4 8 -5.62 0.00
 8 4 9 -5.09 0.00
 8 4 10 -15.34 0.00
 8 4 11 -1.81 0.00
 8 4 12 -2.22 0.00
 8 4 13 -1.44 0.00
 8 4 14 7.37 0.00
 8 4 15 -2.45 0.00
 8 4 16 -4.51 0.00
 8 4 17 13.31 0.00
 8 4 18 -4.61 0.00
 8 4 19 -0.54 0.00
 8 6 0 4.01 0.00
 8 6 1 11.58 0.00
 8 6 2 41.51 0.00
 8 6 3 -3.69 0.00
 8 6 4 -40.43 0.00
 8 6 5 -8.47 0.00
 8 6 6 10.87 0.00
 8 6 7 -6.05 0.00
 8 6 8 3.27 0.00
 8 6 9 2.26 0.00
 8 6 10 22.34 0.00
 8 6 11 -0.10 0.00
 8 6 12 -6.51 0.00
 8 6 13 16.94 0.00
 8 6 14 4.86 0.00
 8 6 15 -2.68 0.00
 8 6 16 -2.38 0.00
 8 6 17 -4.19 0.00
 8 6 18 -2.83 0.00
 8 6 19 2.73 0.00
 8 8 0 -62.83 0.00
 8 8 1 24.19 0.00
 8 8 2 1.70 0.00
 8 8 3 -21.53 0.00
 8 8 4 -24.72 0.00
 8 8 5 0.88 0.00
 8 8 6 -3.34 0.00
 8 8 7 1.73 0.00
 8 8 8 -7.06 0.00
 8 8 9 2.86 0.00
 8 8 10 -0.49 0.00
 8 8 11 0.58 0.00
 8 8 12 -3.12 0.00
 8 8 13 2.85 0.00
 8 8 14 -17.43 0.00
 8 8 15 5.10 0.00
 8 8 16 9.19 0.00
 8 8 17 4.32 0.00
 8 8 18 -1.31 0.00
 8 10 0 19.97 0.00
 8 10 1 15.55 0.00
 8 10 2 6.01 0.00
 8 10 3 -7.76 0.00
 8 10 4 0.06 0.00
 8 10 5 -0.21 0.00
 8 10 6 -3.09 0.00
 8 10 7 -31.61 0.00
 8 10 8 11.96 0.00
 8 10 9 0.94 0.00
 8 10 10 -5.75 0.00
 8 10 11 -11.00 0.00
 8 10 12 -5.99 0.00
 8 10 13 8.16 0.00
 8 10 14 9.93 0.00
 8 10 15 -4.95 0.00
 8 10 16 -5.13 0.00
 8 10 17 -3.61 0.00
 8 10 18 -0.57 0.00
 8 12 0 14.64 0.00
 8 12 1 5.30 0.00
 8 12 2 -14.51 0.00
 8 12 3 -2.06 0.00
 8 12 4 4.33 0.00
 8 12 5 -1.00 0.00
 8 12 6 9.93 0.00
 8 12 7 -6.91 0.00
 8 12 8 -5.42 0.00
 8 12 9 22.55 0.00
 8 12 10 -5.16 0.00
 8 12 11 -0.89 0.00
 8 12 12 -5.08 0.00
 8 12 13 -1.76 0.00
 8 12 14 -0.65 0.00
 8 12 15 -6.68 0.00
 8 12 16 -13.17 0.00
 8 12 17 -3.41 0.00
 8 12 18 -4.10 0.00
 8 14 0 -28.53 0.00
 8 14 1 3.01 0.00
 8 14 2 13.84 0.00
 8 14 3 6.16 0.00
 8 14 4 -12.36 0.00
 8 14 5 5.31 0.00
 8 14 6 -12.17 0.00
 8 14 7 -1.84 0.00
 8 14 8 -4.94 0.00
 8 14 9 -6.10 0.00
 8 14 10 2.45 0.00
 8 14 11 3.87 0.00
 8 14 12 -4.62 0.00
 8 14 13 -3.15 0.00
 8 14 14 -4.73 0.00
 8 14 15 6.95 0.00
 8 14 16 6.21 0.00
 8 14 17 -2.45 0.00
 8 14 18 7.22 0.00
 8 16 0 -4.88 0.00
 8 16 1 -13.12 0.00
 8 16 2 -21.53 0.00
 8 16 3 -7.34 0.00
 8 16 4 0.24 0.00
 8 16 5 0.40 0.00
 8 16 6 10.21 0.00
 8 16 7 0.30 0.00
 8 16 8 -11.28 0.00
 8 16 9 11.80 0.00
 8 16 10 -2.36 0.00
 8 16 11 4.95 0.00
 8 16 12 -4.95 0.00
 8 16 13 1.09 0.00
 8 16 14 -4.10 0.00
 8 16 15 -12.67 0.00
 8 16 16 1.43 0.00
 8 16 17 -3.24 0.00
 8 18 0 6.55 0.00
 8 18 1 -22.00 0.00
 8 18 2 -4.51 0.00
 8 18 3 11.80 0.00
 8 18 4 -5.72 0.00
 8 18 5 0.31 0.00
 8 18 6 -9.78 0.00
 8 18 7 6.52 0.00
 8 18 8 1.38 0.00
 8 18 9 -2.77 0.00
 8 18 10 0.90 0.00
 8 18 11 -0.62 0.00
 8 18 12 2.40 0.00
 8 18 13 4.97 0.00
 8 18 14 -3.71 0.00
 8 18 15 1.42 0.00
 8 18 16 9.18 0.00
 8 18 17 1.58 0.00
 8 20 0 -41.77 0.00
 8 20 1 2.76 0.00
 8 20 2 5.00 0.00
 8 20 3 -11.30 0.00
 8 20 4 -0.54 0.00
 8 20 5 -16.20 0.00
 8 20 6 -6.10 0.00
 8 20 7 -1.51 0.00
 8 20 8 -3.60 0.00
 8 20 9 7.30 0.00
 8 20 10 -0.45 0.00
 8 20 11 7.97 0.00
 8 20 12 -2.86 0.00
 8 20 13 -4.90 0.00
 8 20 14 -7.33 0.00
 8 20 15 2.31 0.00
 8 20 16 4.81 0.00
 8 20 17 2.97 0.00
 8 22 0 1.67 0.00
 8 22 1 -1.69 0.00
 8 22 2 4.19 0.00
 8 22 3 -1.86 0.00
 8 22 4 0.21 0.00
 8 22 5 9.70 0.00
 8 22 6 -4.59 0.00
 8 22 7 3.56 0.00
 8 22 8 -2.18 0.00
 8 22 9 -4.40 0.00
 8 22 10 3.29 0.00
 8 22 11 -0.15 0.00
 8 22 12 -5.44 0.00
 8 22 13 -8.67 0.00
 8 22 14 -14.99 0.00
 8 22 15 -3.00 0.00
 8 22 16 12.47 0.00
 8 24 0 -5.45 0.00
 8 24 1 -2.29 0.00
 8 24 2 -1.58 0.00
 8 24 3 -8.92 0.00
 8 24 4 -1.10 0.00
 8 24 5 5.37 0.00
 8 24 6 -3.17 0.00
 8 24 7 2.73 0.00
 8 24 8 6.39 0.00
 8 24 9 7.25 0.00
 8 24 10 -2.31 0.00
 8 24 11 0.04 0.00
 8 24 12 -5.27 0.00
 8 24 13 4.39 0.00
 8 24 14 3.38 0.00
 8 24 15 1.43 0.00
 8 24 16 1.84 0.00
 8 26 0 -6.13 0.00
 8 26 1 5.38 0.00
 8 26 2 3.21 0.00
 8 26 3 -9.92 0.00
 8 26 4 -5.51 0.00
 8 26 5 2.99 0.00
 8 26 6 -6.22 0.00
 8 26 7 1.33 0.00
 8 26 8 0.42 0.00
 8 26 9 -2.02 0.00
 8 26 10 2.89 0.00
 8 26 11 1.80 0.00
 8 26 12 3.26 0.00
 8 26 13 -15.82 0.00
 8 26 14 3.02 0.00
 8 26 15 1.32 0.00
 8 28 0 5.14 0.00
 8 28 1 2.37 0.00
 8 28 2 -2.47 0.00
 8 28 3 -9.14 0.00
 8 28 4 1.53 0.00
 8 28 5 6.89 0.00
 8 28 6 0.84 0.00
 8 28 7 -2.93 0.00
 8 28 8 -2.88 0.00
 8 28 9 5.69 0.00
 8 28 10 3.64 0.00
 8 28 11 7.09 0.00
 8 28 12 -2.16 0.00
 8 28 13 4.50 0.00
 8 28 14 1.68 0.00
 8 28 15 0.00 0.00
 8 30 0 5.86 0.00
 8 30 1 -0.64 0.00
 8 30 2 -11.08 0.00
 8 30 3 1.25 0.00
 8 30 4 8.41 0.00
 8 30 5 3.80 0.00
 8 30 6 -7.22 0.00
 8 30 7 2.47 0.00
 8 30 8 8.12 0.00
 8 30 9 -1.58 0.00
 8 30 10 2.19 0.00
 8 30 11 -4.27 0.00
 8 30 12 -0.11 0.00
 8 30 13 5.26 0.00
 8 30 14 5.62 0.00
 8 32 0 -2.41 0.00
 8 32 1 -6.60 0.00
 8 32 2 2.25 0.00
 8 32 3 -2.29 0.00
 8 32 4 0.08 0.00
 8 32 5 -8.42 0.00
 8 32 6 -0.32 0.00
 8 32 7 4.73 0.00
 8 32 8 3.14 0.00
 8 32 9 -5.09 0.00
 8 32 10 -4.47 0.00
 8 32 11 7.80 0.00
 8 32 12 3.87 0.00
 8 32 13 -4.33 0.00
 8 32 14 -1.54 0.00
 8 34 0 0.51 0.00
 8 34 1 4.15 0.00
 8 34 2 -4.67 0.00
 8 34 3 -1.21 0.00
 8 34 4 -0.75 0.00
 8 34 5 3.22 0.00
 8 34 6 6.53 0.00
 8 34 7 -1.30 0.00
 8 34 8 -2.79 0.00
 8 34 9 3.91 0.00
 8 34 10 2.28 0.00
 8 34 11 6.77 0.00
 8 34 12 -3.44 0.00
 8 34 13 -4.44 0.00
 8 36 0 -6.45 0.00
 8 36 1 -0.26 0.00
 8 36 2 7.47 0.00
 8 36 3 -1.72 0.00
 8 36 4 -0.30 0.00
 8 36 5 8.77 0.00
 8 36 6 4.11 0.00
 8 36 7 -0.06 0.00
 8 36 8 2.47 0.00
 8 36 9 1.08 0.00
 8 36 10 -2.76 0.00
 8 36 11 -0.43 0.00
 8 38 0 -3.62 0.00
 8 38 1 -6.41 0.00
 8 38 2 3.48 0.00
 8 38 3 6.56 0.00
 8 38 4 -1.26 0.00
 8 38 5 -2.57 0.00
 8 38 6 5.77 0.00
 8 38 7 -2.07 0.00
 8 38 8 5.39 0.00
 8 38 9 1.06 0.00
 8 38 10 -11.05 0.00
 8 40 0 -2.79 0.00
 8 40 1 -4.77 0.00
 8 40 2 0.89 0.00
 8 40 3 4.78 0.00
 8 40 4 -5.04 0.00
 8 40 5 -2.70 0.00
 8 40 6 0.17 0.00
 8 40 7 2.75 0.00
 8 40 8 -7.69 0.00
 8 42 0 0.17 0.00
 8 42 1 33.60 0.00
 8 42 2 7.08 0.00
 8 42 3 -9.44 0.00
 8 42 4 -2.43 0.00
 8 42 5 5.73 0.00
 8 42 6 8.65 0.00
 8 42 7 0.83 0.00
 8 44 0 -6.46 0.00
 8 44 1 1.38 0.00
 8 44 2 -3.33 0.00
 8 44 3 0.95 0.00
 8 44 4 1.41 0.00
 8 44 5 3.26 0.00
 8 44 6 -10.45 0.00
 8 46 2 5.36 0.00
 8 46 3 2.37 0.00
 9 1 0 -19.49 0.00
 9 1 1 1.46 0.00
 9 1 2 -15.90 0.00
 9 1 3 -14.13 0.00
 9 1 4 -29.72 0.00
 9 1 5 6.39 0.00
 9 1 6 32.17 0.00
 9 1 7 7.96 0.00
 9 1 8 -0.04 0.00
 9 1 9 -3.83 0.00
 9 1 10 -3.19 0.00
 9 1 11 -1.04 0.00
 9 1 12 0.76 0.00
 9 1 13 -5.64 0.00
 9 1 14 -8.01 0.00
 9 1 15 -2.68 0.00
 9 1 16 6.52 0.00
 9 1 17 1.82 0.00
 9 1 18 1.76 0.00
 9 1 19 0.31 0.00
 9 3 0 33.06 0.00
 9 3 1 10.72 0.00
 9 3 2 -5.46 0.00
 9 3 3 -14.35 0.00
 9 3 4 -0.54 0.00
 9 3 5 -1.46 0.00
 9 3 6 -3.77 0.00
 9 3 7 18.84 0.00
 9 3 8 19.90 0.00
 9 3 9 13.24 0.00
 9 3 10 -10.44 0.00
 9 3 11 -8.14 0.00
 9 3 12 -5.60 0.00
 9 3 13 -0.05 0.00
 9 3 14 3.78 0.00
 9 3 15 -3.28 0.00
 9 3 16 -4.40 0.00
 9 3 17 -8.29 0.00
 9 3 18 -2.69 0.00
 9 5 0 -47.63 0.00
 9 5 1 10.51 0.00
 9 5 2 -7.03 0.00
 9 5 3 23.32 0.00
 9 5 4 -29.18 0.00
 9 5 5 10.29 0.00
 9 5 6 2.09 0.00
 9 5 7 -9.10 0.00
 9 5 8 2.13 0.00
 9 5 9 13.48 0.00
 9 5 10 5.79 0.00
 9 5 11 8.48 0.00
 9 5 12 -6.47 0.00
 9 5 13 4.82 0.00
 9 5 14 4.03 0.00
 9 5 15 8.17 0.00
 9 5 16 9.32 0.00
 9 5 17 1.03 0.00
 9 5 18 -6.73 0.00
 9 7 0 1.48 0.00
 9 7 1 -8.95 0.00
 9 7 2 -15.70 0.00
 9 7 3 -20.35 0.00
 9 7 4 4.92 0.00
 9 7 5 0.93 0.00
 9 7 6 -12.05 0.00
 9 7 7 -11.09 0.00
 9 7 8 -2.94 0.00
 9 7 9 -7.58 0.00
 9 7 10 4.51 0.00
 9 7 11 2.91 0.00
 9 7 12 -4.95 0.00
 9 7 13 -5.31 0.00
 9 7 14 -1.37 0.00
 9 7 15 -5.80 0.00
 9 7 16 -6.74 0.00
 9 7 17 -1.31 0.00
 9 7 18 -0.58 0.00
 9 9 0 -8.38 0.00
 9 9 1 23.43 0.00
 9 9 2 -17.80 0.00
 9 9 3 3.65 0.00
 9 9 4 18.81 0.00
 9 9 5 -4.98 0.00
 9 9 6 26.19 0.00
 9 9 7 -0.30 0.00
 9 9 8 5.04 0.00
 9 9 9 3.82 0.00
 9 9 10 -8.54 0.00
 9 9 11 -0.93 0.00
 9 9 12 5.25 0.00
 9 9 13 -3.95 0.00
 9 9 14 -13.67 0.00
 9 9 15 7.25 0.00
 9 9 16 10.43 0.00
 9 9 17 7.51 0.00
 9 9 18 -0.05 0.00
 9 11 0 -25.64 0.00
 9 11 1 -36.76 0.00
 9 11 2 26.54 0.00
 9 11 3 8.20 0.00
 9 11 4 -2.08 0.00
 9 11 5 -8.81 0.00
 9 11 6 1.22 0.00
 9 11 7 23.80 0.00
 9 11 8 -7.12 0.00
 9 11 9 -5.57 0.00
 9 11 10 -2.61 0.00
 9 11 11 2.27 0.00
 9 11 12 10.99 0.00
 9 11 13 8.41 0.00
 9 11 14 -10.27 0.00
 9 11 15 -4.83 0.00
 9 11 16 -7.82 0.00
 9 11 17 -1.97 0.00
 9 11 18 1.54 0.00
 9 13 0 -20.91 0.00
 9 13 1 30.99 0.00
 9 13 2 -11.62 0.00
 9 13 3 -7.48 0.00
 9 13 4 -1.58 0.00
 9 13 5 9.28 0.00
 9 13 6 -8.29 0.00
 9 13 7 -8.01 0.00
 9 13 8 11.37 0.00
 9 13 9 -9.26 0.00
 9 13 10 13.10 0.00
 9 13 11 -3.94 0.00
 9 13 12 -15.76 0.00
 9 13 13 -10.99 0.00
 9 13 14 9.88 0.00
 9 13 15 -3.92 0.00
 9 13 16 -15.83 0.00
 9 13 17 -8.12 0.00
 9 13 18 3.86 0.00
 9 15 0 -17.60 0.00
 9 15 1 3.70 0.00
 9 15 2 18.73 0.00
 9 15 3 -5.34 0.00
 9 15 4 4.32 0.00
 9 15 5 6.89 0.00
 9 15 6 11.35 0.00
 9 15 7 -0.11 0.00
 9 15 8 0.73 0.00
 9 15 9 12.51 0.00
 9 15 10 -7.63 0.00
 9 15 11 -4.42 0.00
 9 15 12 8.35 0.00
 9 15 13 9.00 0.00
 9 15 14 -5.56 0.00
 9 15 15 6.73 0.00
 9 15 16 -1.53 0.00
 9 15 17 -4.49 0.00
 9 17 0 -37.05 0.00
 9 17 1 -17.72 0.00
 9 17 2 12.76 0.00
 9 17 3 14.43 0.00
 9 17 4 -22.28 0.00
 9 17 5 -10.92 0.00
 9 17 6 -13.20 0.00
 9 17 7 1.82 0.00
 9 17 8 7.45 0.00
 9 17 9 -4.65 0.00
 9 17 10 -9.58 0.00
 9 17 11 7.91 0.00
 9 17 12 6.24 0.00
 9 17 13 -8.33 0.00
 9 17 14 0.19 0.00
 9 17 15 -4.99 0.00
 9 17 16 7.06 0.00
 9 17 17 -1.76 0.00
 9 19 0 -0.56 0.00
 9 19 1 -0.96 0.00
 9 19 2 -8.62 0.00
 9 19 3 -5.94 0.00
 9 19 4 4.30 0.00
 9 19 5 1.32 0.00
 9 19 6 6.96 0.00
 9 19 7 2.90 0.00
 9 19 8 -20.32 0.00
 9 19 9 3.05 0.00
 9 19 10 -4.68 0.00
 9 19 11 4.97 0.00
 9 19 12 -8.94 0.00
 9 19 13 -2.99 0.00
 9 19 14 2.05 0.00
 9 19 15 0.99 0.00
 9 19 16 -5.33 0.00
 9 19 17 4.96 0.00
 9 21 0 33.95 0.00
 9 21 1 8.56 0.00
 9 21 2 -9.17 0.00
 9 21 3 -2.19 0.00
 9 21 4 13.40 0.00
 9 21 5 -5.73 0.00
 9 21 6 -5.03 0.00
 9 21 7 -9.05 0.00
 9 21 8 -7.40 0.00
 9 21 9 13.83 0.00
 9 21 10 4.36 0.00
 9 21 11 2.12 0.00
 9 21 12 8.52 0.00
 9 21 13 3.98 0.00
 9 21 14 12.09 0.00
 9 21 15 -23.62 0.00
 9 21 16 8.26 0.00
 9 23 0 -10.99 0.00
 9 23 1 -0.13 0.00
 9 23 2 -16.64 0.00
 9 23 3 6.93 0.00
 9 23 4 14.79 0.00
 9 23 5 -4.59 0.00
 9 23 6 -12.24 0.00
 9 23 7 5.87 0.00
 9 23 8 0.10 0.00
 9 23 9 6.37 0.00
 9 23 10 -5.18 0.00
 9 23 11 -4.09 0.00
 9 23 12 4.94 0.00
 9 23 13 -0.03 0.00
 9 23 14 -10.80 0.00
 9 23 15 -5.25 0.00
 9 23 16 8.49 0.00
 9 25 0 4.86 0.00
 9 25 1 0.72 0.00
 9 25 2 7.86 0.00
 9 25 3 -0.52 0.00
 9 25 4 7.33 0.00
 9 25 5 1.58 0.00
 9 25 6 2.00 0.00
 9 25 7 -0.52 0.00
 9 25 8 -9.18 0.00
 9 25 9 -1.71 0.00
 9 25 10 -0.84 0.00
 9 25 11 -7.65 0.00
 9 25 12 -0.53 0.00
 9 25 13 8.08 0.00
 9 25 14 6.81 0.00
 9 25 15 -1.02 0.00
 9 25 16 -9.29 0.00
 9 27 0 -13.73 0.00
 9 27 1 -5.52 0.00
 9 27 2 5.53 0.00
 9 27 3 3.87 0.00
 9 27 4 1.31 0.00
 9 27 5 -0.87 0.00
 9 27 6 3.21 0.00
 9 27 7 1.99 0.00
 9 27 8 3.70 0.00
 9 27 9 3.22 0.00
 9 27 10 8.75 0.00
 9 27 11 5.66 0.00
 9 27 12 1.11 0.00
 9 27 13 4.66 0.00
 9 27 14 -3.09 0.00
 9 27 15 7.91 0.00
 9 29 0 0.72 0.00
 9 29 1 -1.43 0.00
 9 29 2 -3.56 0.00
 9 29 3 8.54 0.00
 9 29 4 2.73 0.00
 9 29 5 -7.95 0.00
 9 29 6 -6.08 0.00
 9 29 7 -2.41 0.00
 9 29 8 -4.39 0.00
 9 29 9 -3.91 0.00
 9 29 10 -7.14 0.00
 9 29 11 -2.77 0.00
 9 29 12 -3.68 0.00
 9 29 13 -8.14 0.00
 9 29 14 -9.98 0.00
 9 31 0 11.66 0.00
 9 31 1 -1.88 0.00
 9 31 2 -9.27 0.00
 9 31 3 4.51 0.00
 9 31 4 -1.48 0.00
 9 31 5 -1.21 0.00
 9 31 6 3.05 0.00
 9 31 7 -3.55 0.00
 9 31 8 -6.63 0.00
 9 31 9 -6.62 0.00
 9 31 10 11.13 0.00
 9 31 11 8.80 0.00
 9 31 12 1.88 0.00
 9 31 13 -0.01 0.00
 9 31 14 3.23 0.00
 9 33 0 0.36 0.00
 9 33 1 20.08 0.00
 9 33 2 5.48 0.00
 9 33 3 -8.91 0.00
 9 33 4 -0.23 0.00
 9 33 5 -1.70 0.00
 9 33 6 -0.87 0.00
 9 33 7 -2.05 0.00
 9 33 8 -0.62 0.00
 9 33 9 -5.64 0.00
 9 33 10 -6.34 0.00
 9 33 11 -10.87 0.00
 9 33 12 2.51 0.00
 9 33 13 0.10 0.00
 9 35 0 7.43 0.00
 9 35 1 8.02 0.00
 9 35 2 -12.23 0.00
 9 35 3 -2.12 0.00
 9 35 4 -3.13 0.00
 9 35 5 1.66 0.00
 9 35 6 -12.08 0.00
 9 35 7 3.31 0.00
 9 35 8 11.04 0.00
 9 35 9 2.49 0.00
 9 35 10 -6.65 0.00
 9 35 11 -4.37 0.00
 9 35 12 -1.51 0.00
 9 37 0 4.87 0.00
 9 37 1 -7.13 0.00
 9 37 2 1.42 0.00
 9 37 3 2.40 0.00
 9 37 4 -1.67 0.00
 9 37 5 -1.14 0.00
 9 37 6 4.10 0.00
 9 37 7 -3.34 0.00
 9 37 8 -0.28 0.00
 9 37 9 2.48 0.00
 9 37 10 0.07 0.00
 9 39 0 10.54 0.00
 9 39 1 -0.32 0.00
 9 39 2 -9.80 0.00
 9 39 3 5.76 0.00
 9 39 4 -7.03 0.00
 9 39 5 -5.87 0.00
 9 39 6 1.66 0.00
 9 39 7 4.06 0.00
 9 39 8 -5.40 0.00
 9 41 0 15.32 0.00
 9 41 1 2.38 0.00
 9 41 2 -10.53 0.00
 9 41 3 -0.89 0.00
 9 41 4 2.01 0.00
 9 41 5 0.08 0.00
 9 41 6 -0.20 0.00
 9 41 7 -2.16 0.00
 9 43 0 29.19 0.00
 9 43 1 -0.64 0.00
 9 43 2 -20.93 0.00
 9 43 3 -4.19 0.00
 9 43 4 0.65 0.00
 9 43 5 0.20 0.00
 9 43 6 1.67 0.00
 9 45 2 8.80 0.00
 9 45 3 9.11 0.00
 9 45 4 3.21 0.00
 10 0 0 51.09 0.00
 10 0 2 11.88 0.00
 10 0 4 29.24 0.00
 10 0 6 -11.13 0.00
 10 0 8 32.32 0.00
 10 0 10 9.62 0.00
 10 0 12 -11.37 0.00
 10 0 14 0.68 0.00
 10 0 16 -7.58 0.00
 10 0 18 8.80 0.00
 10 2 0 -4.49 0.00
 10 2 1 20.73 0.00
 10 2 2 -10.22 0.00
 10 2 3 -7.00 0.00
 10 2 4 -6.11 0.00
 10 2 5 4.25 0.00
 10 2 6 -19.18 0.00
 10 2 7 15.81 0.00
 10 2 8 -8.73 0.00
 10 2 9 2.43 0.00
 10 2 10 -7.31 0.00
 10 2 11 4.66 0.00
 10 2 12 -0.65 0.00
 10 2 13 -2.50 0.00
 10 2 14 5.99 0.00
 10 2 15 2.25 0.00
 10 2 16 2.99 0.00
 10 2 17 4.56 0.00
 10 2 18 -4.53 0.00
 10 4 0 29.10 0.00
 10 4 1 4.09 0.00
 10 4 2 5.51 0.00
 10 4 3 -19.97 0.00
 10 4 4 -2.61 0.00
 10 4 5 -12.08 0.00
 10 4 6 33.03 0.00
 10 4 7 -2.13 0.00
 10 4 8 -4.55 0.00
 10 4 9 -1.01 0.00
 10 4 10 0.32 0.00
 10 4 11 -4.01 0.00
 10 4 12 1.46 0.00
 10 4 13 15.09 0.00
 10 4 14 -3.00 0.00
 10 4 15 1.28 0.00
 10 4 16 2.54 0.00
 10 4 17 -1.20 0.00
 10 4 18 3.17 0.00
 10 6 0 12.73 0.00
 10 6 1 2.02 0.00
 10 6 2 7.75 0.00
 10 6 3 -28.12 0.00
 10 6 4 -8.44 0.00
 10 6 5 13.59 0.00
 10 6 6 -5.43 0.00
 10 6 7 5.60 0.00
 10 6 8 -7.35 0.00
 10 6 9 -9.75 0.00
 10 6 10 3.30 0.00
 10 6 11 9.54 0.00
 10 6 12 -6.16 0.00
 10 6 13 -4.81 0.00
 10 6 14 7.90 0.00
 10 6 15 16.74 0.00
 10 6 16 -6.64 0.00
 10 6 17 -5.79 0.00
 10 6 18 1.28 0.00
 10 8 0 65.48 0.00
 10 8 1 23.60 0.00
 10 8 2 -18.21 0.00
 10 8 3 -33.48 0.00
 10 8 4 17.69 0.00
 10 8 5 -10.49 0.00
 10 8 6 1.57 0.00
 10 8 7 5.15 0.00
 10 8 8 -4.20 0.00
 10 8 9 9.88 0.00
 10 8 10 5.77 0.00
 10 8 11 1.46 0.00
 10 8 12 -4.83 0.00
 10 8 13 7.00 0.00
 10 8 14 3.36 0.00
 10 8 15 -1.73 0.00
 10 8 16 -3.05 0.00
 10 8 17 4.07 0.00
 10 8 18 1.46 0.00
 10 10 0 -7.17 0.00
 10 10 1 5.70 0.00
 10 10 2 3.43 0.00
 10 10 3 -12.71 0.00
 10 10 4 -27.77 0.00
 10 10 5 28.92 0.00
 10 10 6 10.70 0.00
 10 10 7 -15.14 0.00
 10 10 8 -3.26 0.00
 10 10 9 -8.79 0.00
 10 10 10 -2.38 0.00
 10 10 11 -7.88 0.00
 10 10 12 -0.74 0.00
 10 10 13 3.77 0.00
 10 10 14 -5.46 0.00
 10 10 15 0.36 0.00
 10 10 16 -0.52 0.00
 10 10 17 -3.51 0.00
 10 10 18 1.54 0.00
 10 12 0 13.54 0.00
 10 12 1 13.36 0.00
 10 12 2 16.54 0.00
 10 12 3 -10.00 0.00
 10 12 4 5.64 0.00
 10 12 5 -0.08 0.00
 10 12 6 7.65 0.00
 10 12 7 -22.50 0.00
 10 12 8 12.18 0.00
 10 12 9 5.09 0.00
 10 12 10 -5.26 0.00
 10 12 11 2.41 0.00
 10 12 12 -11.58 0.00
 10 12 13 -4.50 0.00
 10 12 14 1.34 0.00
 10 12 15 4.49 0.00
 10 12 16 -9.02 0.00
 10 12 17 0.60 0.00
 10 12 18 -4.54 0.00
 10 14 0 5.62 0.00
 10 14 1 12.66 0.00
 10 14 2 -42.10 0.00
 10 14 3 3.48 0.00
 10 14 4 -1.65 0.00
 10 14 5 8.03 0.00
 10 14 6 -4.06 0.00
 10 14 7 9.29 0.00
 10 14 8 -11.45 0.00
 10 14 9 22.02 0.00
 10 14 10 -2.54 0.00
 10 14 11 -2.33 0.00
 10 14 12 -11.02 0.00
 10 14 13 1.90 0.00
 10 14 14 -1.43 0.00
 10 14 15 -9.48 0.00
 10 14 16 6.79 0.00
 10 14 17 -4.48 0.00
 10 16 0 -12.71 0.00
 10 16 1 -13.79 0.00
 10 16 2 12.68 0.00
 10 16 3 8.32 0.00
 10 16 4 -9.48 0.00
 10 16 5 -12.90 0.00
 10 16 6 1.30 0.00
 10 16 7 -1.62 0.00
 10 16 8 3.23 0.00
 10 16 9 -6.54 0.00
 10 16 10 -1.53 0.00
 10 16 11 5.52 0.00
 10 16 12 2.14 0.00
 10 16 13 -4.73 0.00
 10 16 14 -8.02 0.00
 10 16 15 -1.42 0.00
 10 16 16 0.32 0.00
 10 16 17 4.04 0.00
 10 18 0 -16.61 0.00
 10 18 1 11.43 0.00
 10 18 2 -7.78 0.00
 10 18 3 -6.18 0.00
 10 18 4 -1.48 0.00
 10 18 5 -10.89 0.00
 10 18 6 -2.09 0.00
 10 18 7 16.20 0.00
 10 18 8 -1.84 0.00
 10 18 9 2.47 0.00
 10 18 10 6.29 0.00
 10 18 11 5.01 0.00
 10 18 12 -7.83 0.00
 10 18 13 -0.42 0.00
 10 18 14 6.37 0.00
 10 18 15 4.67 0.00
 10 18 16 2.85 0.00
 10 18 17 -3.47 0.00
 10 20 0 -6.15 0.00
 10 20 1 -1.17 0.00
 10 20 2 -1.21 0.00
 10 20 3 -1.21 0.00
 10 20 4 10.19 0.00
 10 20 5 14.38 0.00
 10 20 6 -17.76 0.00
 10 20 7 -10.68 0.00
 10 20 8 0.63 0.00
 10 20 9 16.29 0.00
 10 20 10 -1.30 0.00
 10 20 11 -9.03 0.00
 10 20 12 -0.72 0.00
 10 20 13 5.01 0.00
 10 20 14 -9.15 0.00
 10 20 15 0.32 0.00
 10 20 16 4.65 0.00
 10 22 0 -21.73 0.00
 10 22 1 -6.87 0.00
 10 22 2 13.12 0.00
 10 22 3 -15.25 0.00
 10 22 4 3.37 0.00
 10 22 5 -8.27 0.00
 10 22 6 -5.73 0.00
 10 22 7 -0.42 0.00
 10 22 8 7.94 0.00
 10 22 9 -6.66 0.00
 10 22 10 10.10 0.00
 10 22 11 1.16 0.00
 10 22 12 -4.79 0.00
 10 22 13 -3.79 0.00
 10 22 14 -15.23 0.00
 10 22 15 -3.46 0.00
 10 22 16 7.49 0.00
 10 24 0 -3.37 0.00
 10 24 1 5.93 0.00
 10 24 2 3.33 0.00
 10 24 3 1.37 0.00
 10 24 4 -3.30 0.00
 10 24 5 18.71 0.00
 10 24 6 -1.53 0.00
 10 24 7 0.63 0.00
 10 24 8 -7.56 0.00
 10 24 9 5.80 0.00
 10 24 10 9.92 0.00
 10 24 11 9.28 0.00
 10 24 12 -14.05 0.00
 10 24 13 -12.07 0.00
 10 24 14 8.31 0.00
 10 24 15 12.32 0.00
 10 24 16 -6.66 0.00
 10 26 0 -0.61 0.00
 10 26 1 -4.48 0.00
 10 26 2 1.80 0.00
 10 26 3 -14.05 0.00
 10 26 4 -7.00 0.00
 10 26 5 2.26 0.00
 10 26 6 -0.52 0.00
 10 26 7 -7.53 0.00
 10 26 8 -7.70 0.00
 10 26 9 5.64 0.00
 10 26 10 6.91 0.00
 10 26 11 -1.35 0.00
 10 26 12 0.28 0.00
 10 26 13 4.15 0.00
 10 26 14 5.74 0.00
 10 26 15 -4.45 0.00
 10 28 0 2.53 0.00
 10 28 1 -2.22 0.00
 10 28 2 -7.61 0.00
 10 28 3 -0.23 0.00
 10 28 4 7.27 0.00
 10 28 5 0.52 0.00
 10 28 6 -7.72 0.00
 10 28 7 9.99 0.00
 10 28 8 2.89 0.00
 10 28 9 -4.10 0.00
 10 28 10 -1.61 0.00
 10 28 11 5.99 0.00
 10 28 12 8.45 0.00
 10 28 13 -0.23 0.00
 10 28 14 -8.13 0.00
 10 30 0 -0.04 0.00
 10 30 1 0.05 0.00
 10 30 2 -5.24 0.00
 10 30 3 -0.52 0.00
 10 30 4 -2.41 0.00
 10 30 5 -3.68 0.00
 10 30 6 -1.04 0.00
 10 30 7 -4.85 0.00
 10 30 8 -0.07 0.00
 10 30 9 2.25 0.00
 10 30 10 -7.01 0.00
 10 30 11 8.22 0.00
 10 30 12 9.01 0.00
 10 30 13 -3.50 0.00
 10 30 14 4.40 0.00
 10 32 0 -1.14 0.00
 10 32 1 -3.76 0.00
 10 32 2 3.43 0.00
 10 32 3 -2.98 0.00
 10 32 4 -2.92 0.00
 10 32 5 3.72 0.00
 10 32 6 2.74 0.00
 10 32 7 -0.61 0.00
 10 32 8 -4.74 0.00
 10 32 9 3.05 0.00
 10 32 10 4.42 0.00
 10 32 11 -3.14 0.00
 10 32 12 -8.18 0.00
 10 32 13 1.93 0.00
 10 34 0 4.76 0.00
 10 34 1 1.52 0.00
 10 34 2 -10.24 0.00
 10 34 3 -5.01 0.00
 10 34 4 -0.57 0.00
 10 34 5 1.28 0.00
 10 34 6 -0.70 0.00
 10 34 7 -3.99 0.00
 10 34 8 8.92 0.00
 10 34 9 3.08 0.00
 10 34 10 -2.64 0.00
 10 34 11 -2.87 0.00
 10 34 12 3.34 0.00
 10 36 0 -1.86 0.00
 10 36 1 2.89 0.00
 10 36 2 9.63 0.00
 10 36 3 -0.49 0.00
 10 36 4 -1.27 0.00
 10 36 5 1.84 0.00
 10 36 6 6.75 0.00
 10 36 7 6.08 0.00
 10 36 8 -1.84 0.00
 10 36 9 -3.03 0.00
 10 36 10 4.33 0.00
 10 38 0 -7.07 0.00
 10 38 1 -1.30 0.00
 10 38 2 5.26 0.00
 10 38 3 6.58 0.00
 10 38 4 -1.68 0.00
 10 38 5 -1.10 0.00
 10 38 6 6.25 0.00
 10 38 7 3.79 0.00
 10 38 8 -5.49 0.00
 10 40 0 3.58 0.00
 10 40 1 4.63 0.00
 10 40 2 -4.29 0.00
 10 40 3 5.96 0.00
 10 40 4 2.36 0.00
 10 40 5 -8.43 0.00
 10 40 6 -2.64 0.00
 10 40 7 -1.57 0.00
 10 42 0 0.69 0.00
 10 42 1 20.96 0.00
 10 42 2 -0.72 0.00
 10 42 3 1.75 0.00
 10 42 4 0.95 0.00
 10 42 5 2.97 0.00
 10 42 6 6.74 0.00
 10 44 2 5.83 0.00
 10 44 3 -3.91 0.00
 10 44 4 -0.12 0.00
 11 1 0 -23.18 0.00
 11 1 1 -6.13 0.00
 11 1 2 -6.59 0.00
 11 1 3 -4.18 0.00
 11 1 4 -7.27 0.00
 11 1 5 -9.51 0.00
 11 1 6 24.87 0.00
 11 1 7 -2.85 0.00
 11 1 8 0.55 0.00
 11 1 9 3.08 0.00
 11 1 10 0.04 0.00
 11 1 11 -11.76 0.00
 11 1 12 6.32 0.00
 11 1 13 5.57 0.00
 11 1 14 1.67 0.00
 11 1 15 -3.34 0.00
 11 1 16 -6.77 0.00
 11 1 17 -4.28 0.00
 11 1 18 6.37 0.00
 11 3 0 -17.37 0.00
 11 3 1 9.19 0.00
 11 3 2 0.68 0.00
 11 3 3 0.74 0.00
 11 3 4 -5.37 0.00
 11 3 5 17.00 0.00
 11 3 6 15.70 0.00
 11 3 7 6.38 0.00
 11 3 8 -1.96 0.00
 11 3 9 13.41 0.00
 11 3 10 -1.65 0.00
 11 3 11 -1.40 0.00
 11 3 12 -8.16 0.00
 11 3 13 -3.09 0.00
 11 3 14 3.24 0.00
 11 3 15 2.41 0.00
 11 3 16 1.28 0.00
 11 3 17 1.98 0.00
 11 3 18 -4.70 0.00
 11 5 0 7.51 0.00
 11 5 1 -14.57 0.00
 11 5 2 -20.86 0.00
 11 5 3 1.76 0.00
 11 5 4 4.63 0.00
 11 5 5 4.48 0.00
 11 5 6 3.74 0.00
 11 5 7 5.35 0.00
 11 5 8 6.19 0.00
 11 5 9 1.40 0.00
 11 5 10 0.68 0.00
 11 5 11 8.74 0.00
 11 5 12 -0.97 0.00
 11 5 13 7.83 0.00
 11 5 14 -0.62 0.00
 11 5 15 3.81 0.00
 11 5 16 5.50 0.00
 11 5 17 8.26 0.00
 11 5 18 -0.07 0.00
 11 7 0 -19.23 0.00
 11 7 1 -20.97 0.00
 11 7 2 -10.00 0.00
 11 7 3 22.18 0.00
 11 7 4 7.76 0.00
 11 7 5 -9.81 0.00
 11 7 6 -6.85 0.00
 11 7 7 -3.10 0.00
 11 7 8 2.28 0.00
 11 7 9 -2.07 0.00
 11 7 10 6.54 0.00
 11 7 11 -8.16 0.00
 11 7 12 0.43 0.00
 11 7 13 -0.28 0.00
 11 7 14 -5.49 0.00
 11 7 15 -2.48 0.00
 11 7 16 0.72 0.00
 11 7 17 -4.74 0.00
 11 7 18 -0.36 0.00
 11 9 0 -10.59 0.00
 11 9 1 -10.68 0.00
 11 9 2 0.47 0.00
 11 9 3 -5.28 0.00
 11 9 4 2.14 0.00
 11 9 5 -1.44 0.00
 11 9 6 12.34 0.00
 11 9 7 -6.09 0.00
 11 9 8 0.49 0.00
 11 9 9 7.74 0.00
 11 9 10 4.38 0.00
 11 9 11 -1.45 0.00
 11 9 12 -2.71 0.00
 11 9 13 4.69 0.00
 11 9 14 -1.57 0.00
 11 9 15 9.21 0.00
 11 9 16 -1.42 0.00
 11 9 17 -3.50 0.00
 11 9 18 -0.18 0.00
 11 11 0 -14.34 0.00
 11 11 1 19.50 0.00
 11 11 2 -8.37 0.00
 11 11 3 8.40 0.00
 11 11 4 7.64 0.00
 11 11 5 -2.25 0.00
 11 11 6 8.46 0.00
 11 11 7 5.53 0.00
 11 11 8 -1.37 0.00
 11 11 9 6.78 0.00
 11 11 10 8.15 0.00
 11 11 11 -0.73 0.00
 11 11 12 -4.56 0.00
 11 11 13 -7.74 0.00
 11 11 14 -9.13 0.00
 11 11 15 1.96 0.00
 11 11 16 -2.08 0.00
 11 11 17 -7.98 0.00
 11 13 0 -16.24 0.00
 11 13 1 -12.79 0.00
 11 13 2 -2.15 0.00
 11 13 3 -1.54 0.00
 11 13 4 -2.99 0.00
 11 13 5 -6.51 0.00
 11 13 6 -6.08 0.00
 11 13 7 16.35 0.00
 11 13 8 6.14 0.00
 11 13 9 -7.10 0.00
 11 13 10 -4.52 0.00
 11 13 11 -18.26 0.00
 11 13 12 19.89 0.00
 11 13 13 8.55 0.00
 11 13 14 -6.40 0.00
 11 13 15 -15.44 0.00
 11 13 16 4.38 0.00
 11 13 17 -1.56 0.00
 11 15 0 -21.33 0.00
 11 15 1 18.48 0.00
 11 15 2 22.63 0.00
 11 15 3 -4.56 0.00
 11 15 4 -9.85 0.00
 11 15 5 11.09 0.00
 11 15 6 -5.65 0.00
 11 15 7 -4.32 0.00
 11 15 8 8.91 0.00
 11 15 9 3.30 0.00
 11 15 10 3.75 0.00
 11 15 11 0.24 0.00
 11 15 12 -4.48 0.00
 11 15 13 1.35 0.00
 11 15 14 1.59 0.00
 11 15 15 -2.40 0.00
 11 15 16 -13.77 0.00
 11 15 17 5.70 0.00
 11 17 0 -16.80 0.00
 11 17 1 5.25 0.00
 11 17 2 -4.66 0.00
 11 17 3 -9.70 0.00
 11 17 4 2.67 0.00
 11 17 5 0.75 0.00
 11 17 6 -7.68 0.00
 11 17 7 -4.56 0.00
 11 17 8 0.66 0.00
 11 17 9 2.89 0.00
 11 17 10 1.39 0.00
 11 17 11 -1.72 0.00
 11 17 12 -5.77 0.00
 11 17 13 -1.55 0.00
 11 17 14 10.87 0.00
 11 17 15 -1.57 0.00
 11 17 16 -4.15 0.00
 11 17 17 -3.56 0.00
 11 19 0 15.31 0.00
 11 19 1 -7.67 0.00
 11 19 2 5.08 0.00
 11 19 3 5.35 0.00
 11 19 4 5.22 0.00
 11 19 5 -13.40 0.00
 11 19 6 -15.73 0.00
 11 19 7 6.83 0.00
 11 19 8 -9.59 0.00
 11 19 9 1.06 0.00
 11 19 10 0.89 0.00
 11 19 11 -0.20 0.00
 11 19 12 7.13 0.00
 11 19 13 -3.91 0.00
 11 19 14 -3.49 0.00
 11 19 15 -0.83 0.00
 11 19 16 4.40 0.00
 11 21 0 -8.04 0.00
 11 21 1 -5.48 0.00
 11 21 2 8.24 0.00
 11 21 3 14.11 0.00
 11 21 4 9.64 0.00
 11 21 5 -13.12 0.00
 11 21 6 -2.49 0.00
 11 21 7 -2.56 0.00
 11 21 8 0.87 0.00
 11 21 9 3.64 0.00
 11 21 10 -10.41 0.00
 11 21 11 -0.04 0.00
 11 21 12 7.06 0.00
 11 21 13 2.44 0.00
 11 21 14 0.00 0.00
 11 21 15 -0.07 0.00
 11 21 16 -0.86 0.00
 11 23 0 9.86 0.00
 11 23 1 6.69 0.00
 11 23 2 -4.34 0.00
 11 23 3 -1.73 0.00
 11 23 4 -0.73 0.00
 11 23 5 1.25 0.00
 11 23 6 3.61 0.00
 11 23 7 -5.28 0.00
 11 23 8 -9.75 0.00
 11 23 9 3.59 0.00
 11 23 10 6.22 0.00
 11 23 11 0.82 0.00
 11 23 12 0.75 0.00
 11 23 13 -7.13 0.00
 11 23 14 8.36 0.00
 11 23 15 10.98 0.00
 11 23 16 -0.45 0.00
 11 25 0 -0.48 0.00
 11 25 1 -0.36 0.00
 11 25 2 4.91 0.00
 11 25 3 5.21 0.00
 11 25 4 7.86 0.00
 11 25 5 -0.01 0.00
 11 25 6 0.48 0.00
 11 25 7 -2.79 0.00
 11 25 8 2.34 0.00
 11 25 9 2.90 0.00
 11 25 10 -0.39 0.00
 11 25 11 -0.04 0.00
 11 25 12 -1.63 0.00
 11 25 13 8.66 0.00
 11 25 14 -6.78 0.00
 11 25 15 0.79 0.00
 11 27 0 -1.15 0.00
 11 27 1 -1.08 0.00
 11 27 2 5.57 0.00
 11 27 3 4.03 0.00
 11 27 4 -4.24 0.00
 11 27 5 -3.90 0.00
 11 27 6 4.34 0.00
 11 27 7 6.74 0.00
 11 27 8 -2.08 0.00
 11 27 9 -1.38 0.00
 11 27 10 0.92 0.00
 11 27 11 -5.44 0.00
 11 27 12 -2.46 0.00
 11 27 13 4.41 0.00
 11 27 14 7.60 0.00
 11 29 0 -4.17 0.00
 11 29 1 3.86 0.00
 11 29 2 -4.21 0.00
 11 29 3 0.38 0.00
 11 29 4 5.97 0.00
 11 29 5 3.57 0.00
 11 29 6 -9.59 0.00
 11 29 7 -7.24 0.00
 11 29 8 -2.86 0.00
 11 29 9 2.02 0.00
 11 29 10 6.55 0.00
 11 29 11 -1.04 0.00
 11 29 12 -9.63 0.00
 11 29 13 -3.78 0.00
 11 29 14 -2.42 0.00
 11 31 0 3.04 0.00
 11 31 1 6.97 0.00
 11 31 2 -0.09 0.00
 11 31 3 -0.31 0.00
 11 31 4 6.88 0.00
 11 31 5 -1.07 0.00
 11 31 6 -8.97 0.00
 11 31 7 1.69 0.00
 11 31 8 4.08 0.00
 11 31 9 -6.09 0.00
 11 31 10 -3.92 0.00
 11 31 11 -3.38 0.00
 11 31 12 2.37 0.00
 11 31 13 2.80 0.00
 11 33 0 9.49 0.00
 11 33 1 -7.32 0.00
 11 33 2 -5.93 0.00
 11 33 3 3.03 0.00
 11 33 4 -5.56 0.00
 11 33 5 -5.89 0.00
 11 33 6 -2.58 0.00
 11 33 7 -0.42 0.00
 11 33 8 -0.64 0.00
 11 33 9 -6.40 0.00
 11 33 10 3.26 0.00
 11 33 11 1.21 0.00
 11 33 12 -1.26 0.00
 11 35 0 -1.45 0.00
 11 35 1 4.49 0.00
 11 35 2 3.27 0.00
 11 35 3 -0.83 0.00
 11 35 4 -5.26 0.00
 11 35 5 5.40 0.00
 11 35 6 2.57 0.00
 11 35 7 -0.61 0.00
 11 35 8 -1.57 0.00
 11 35 9 -0.20 0.00
 11 35 10 1.89 0.00
 11 35 11 -0.43 0.00
 11 37 0 12.30 0.00
 11 37 1 8.45 0.00
 11 37 2 -8.95 0.00
 11 37 3 -8.31 0.00
 11 37 4 -1.79 0.00
 11 37 5 -2.11 0.00
 11 37 6 -0.04 0.00
 11 37 7 -3.48 0.00
 11 37 8 -0.13 0.00
 11 37 9 6.36 0.00
 11 39 0 5.46 0.00
 11 39 1 -0.82 0.00
 11 39 2 -2.50 0.00
 11 39 3 4.66 0.00
 11 39 4 -0.30 0.00
 11 39 5 -1.65 0.00
 11 39 6 -8.59 0.00
 11 39 7 3.69 0.00
 11 39 8 3.30 0.00
 11 41 0 -2.45 0.00
 11 41 1 -3.29 0.00
 11 41 2 -1.13 0.00
 11 41 3 1.51 0.00
 11 41 4 -11.34 0.00
 11 41 5 -4.03 0.00
 11 41 6 6.79 0.00
 11 41 7 1.77 0.00
 11 43 0 19.82 0.00
 11 43 1 8.37 0.00
 11 43 2 -4.32 0.00
 11 43 3 -4.00 0.00
 11 43 4 -1.84 0.00
 11 43 5 6.37 0.00
 12 0 0 7.78 0.00
 12 0 2 -20.02 0.00
 12 0 4 12.09 0.00
 12 0 6 -33.43 0.00
 12 0 8 -4.98 0.00
 12 0 10 4.54 0.00
 12 0 12 2.11 0.00
 12 0 14 12.37 0.00
 12 0 16 6.06 0.00
 12 2 0 1.50 0.00
 12 2 1 5.41 0.00
 12 2 2 21.20 0.00
 12 2 3 -1.86 0.00
 12 2 4 1.21 0.00
 12 2 5 7.98 0.00
 12 2 6 18.74 0.00
 12 2 7 4.51 0.00
 12 2 8 0.57 0.00
 12 2 9 6.86 0.00
 12 2 10 8.66 0.00
 12 2 11 -0.01 0.00
 12 2 12 -3.34 0.00
 12 2 13 -0.73 0.00
 12 2 14 -0.48 0.00
 12 2 15 14.74 0.00
 12 2 16 -8.30 0.00
 12 2 17 -2.71 0.00
 12 2 18 -2.45 0.00
 12 4 0 -9.54 0.00
 12 4 1 2.23 0.00
 12 4 2 -0.01 0.00
 12 4 3 -6.72 0.00
 12 4 4 -19.30 0.00
 12 4 5 -10.62 0.00
 12 4 6 2.03 0.00
 12 4 7 6.16 0.00
 12 4 8 -3.37 0.00
 12 4 9 -17.87 0.00
 12 4 10 -6.39 0.00
 12 4 11 12.54 0.00
 12 4 12 -1.20 0.00
 12 4 13 -6.55 0.00
 12 4 14 16.02 0.00
 12 4 15 19.17 0.00
 12 4 16 -1.33 0.00
 12 4 17 -1.33 0.00
 12 4 18 14.64 0.00
 12 6 0 58.61 0.00
 12 6 1 4.59 0.00
 12 6 2 6.83 0.00
 12 6 3 -16.14 0.00
 12 6 4 27.23 0.00
 12 6 5 -7.47 0.00
 12 6 6 16.65 0.00
 12 6 7 10.08 0.00
 12 6 8 3.16 0.00
 12 6 9 7.11 0.00
 12 6 10 -0.40 0.00
 12 6 11 -4.81 0.00
 12 6 12 0.48 0.00
 12 6 13 14.15 0.00
 12 6 14 -0.31 0.00
 12 6 15 -1.25 0.00
 12 6 16 1.74 0.00
 12 6 17 0.26 0.00
 12 6 18 -4.07 0.00
 12 8 0 -10.52 0.00
 12 8 1 -9.89 0.00
 12 8 2 7.08 0.00
 12 8 3 -5.98 0.00
 12 8 4 -16.20 0.00
 12 8 5 3.52 0.00
 12 8 6 3.30 0.00
 12 8 7 1.23 0.00
 12 8 8 -7.09 0.00
 12 8 9 -1.37 0.00
 12 8 10 9.21 0.00
 12 8 11 -9.03 0.00
 12 8 12 -3.22 0.00
 12 8 13 3.42 0.00
 12 8 14 -0.31 0.00
 12 8 15 5.68 0.00
 12 8 16 -2.67 0.00
 12 8 17 4.30 0.00
 12 10 0 50.05 0.00
 12 10 1 27.55 0.00
 12 10 2 -18.96 0.00
 12 10 3 -17.83 0.00
 12 10 4 27.73 0.00
 12 10 5 -2.61 0.00
 12 10 6 -3.91 0.00
 12 10 7 -2.19 0.00
 12 10 8 -3.51 0.00
 12 10 9 -2.10 0.00
 12 10 10 4.64 0.00
 12 10 11 4.77 0.00
 12 10 12 -5.07 0.00
 12 10 13 1.02 0.00
 12 10 14 1.56 0.00
 12 10 15 -2.64 0.00
 12 10 16 1.17 0.00
 12 10 17 -7.14 0.00
 12 12 0 14.87 0.00
 12 12 1 15.38 0.00
 12 12 2 -26.90 0.00
 12 12 3 -5.98 0.00
 12 12 4 -8.30 0.00
 12 12 5 10.04 0.00
 12 12 6 2.96 0.00
 12 12 7 -4.00 0.00
 12 12 8 10.44 0.00
 12 12 9 -5.33 0.00
 12 12 10 1.91 0.00
 12 12 11 -13.91 0.00
 12 12 12 -4.97 0.00
 12 12 13 -3.84 0.00
 12 12 14 -3.81 0.00
 12 12 15 -4.20 0.00
 12 12 16 1.93 0.00
 12 12 17 13.67 0.00
 12 14 0 -12.96 0.00
 12 14 1 0.80 0.00
 12 14 2 4.42 0.00
 12 14 3 1.82 0.00
 12 14 4 -0.75 0.00
 12 14 5 -1.43 0.00
 12 14 6 10.95 0.00
 12 14 7 5.41 0.00
 12 14 8 -2.66 0.00
 12 14 9 -0.82 0.00
 12 14 10 -16.77 0.00
 12 14 11 16.63 0.00
 12 14 12 -4.92 0.00
 12 14 13 -6.98 0.00
 12 14 14 -4.45 0.00
 12 14 15 -2.68 0.00
 12 14 16 -2.83 0.00
 12 14 17 1.48 0.00
 12 16 0 -1.71 0.00
 12 16 1 12.19 0.00
 12 16 2 -13.57 0.00
 12 16 3 -10.04 0.00
 12 16 4 -11.84 0.00
 12 16 5 -3.92 0.00
 12 16 6 -8.99 0.00
 12 16 7 0.99 0.00
 12 16 8 -1.77 0.00
 12 16 9 2.12 0.00
 12 16 10 6.09 0.00
 12 16 11 -12.76 0.00
 12 16 12 0.44 0.00
 12 16 13 -0.83 0.00
 12 16 14 6.21 0.00
 12 16 15 -5.83 0.00
 12 16 16 -3.78 0.00
 12 18 0 1.39 0.00
 12 18 1 -5.13 0.00
 12 18 2 9.74 0.00
 12 18 3 16.23 0.00
 12 18 4 -1.25 0.00
 12 18 5 -3.82 0.00
 12 18 6 7.09 0.00
 12 18 7 12.58 0.00
 12 18 8 5.25 0.00
 12 18 9 4.19 0.00
 12 18 10 12.82 0.00
 12 18 11 -3.44 0.00
 12 18 12 -3.05 0.00
 12 18 13 8.97 0.00
 12 18 14 -6.80 0.00
 12 18 15 -5.73 0.00
 12 18 16 0.98 0.00
 12 20 0 -4.55 0.00
 12 20 1 -1.05 0.00
 12 20 2 -4.05 0.00
 12 20 3 -6.92 0.00
 12 20 4 3.46 0.00
 12 20 5 -3.69 0.00
 12 20 6 4.80 0.00
 12 20 7 -0.75 0.00
 12 20 8 -5.90 0.00
 12 20 9 -9.45 0.00
 12 20 10 6.67 0.00
 12 20 11 -3.41 0.00
 12 20 12 -17.02 0.00
 12 20 13 0.57 0.00
 12 20 14 6.74 0.00
 12 20 15 16.23 0.00
 12 20 16 -11.69 0.00
 12 22 0 18.38 0.00
 12 22 1 21.61 0.00
 12 22 2 -0.55 0.00
 12 22 3 -9.67 0.00
 12 22 4 14.30 0.00
 12 22 5 17.82 0.00
 12 22 6 -6.01 0.00
 12 22 7 -9.21 0.00
 12 22 8 8.71 0.00
 12 22 9 3.93 0.00
 12 22 10 3.65 0.00
 12 22 11 7.99 0.00
 12 22 12 -3.51 0.00
 12 22 13 -5.05 0.00
 12 22 14 7.56 0.00
 12 22 15 -5.04 0.00
 12 24 0 -2.19 0.00
 12 24 1 -3.11 0.00
 12 24 2 -0.69 0.00
 12 24 3 -11.59 0.00
 12 24 4 -1.68 0.00
 12 24 5 8.46 0.00
 12 24 6 2.81 0.00
 12 24 7 -3.12 0.00
 12 24 8 -0.74 0.00
 12 24 9 2.74 0.00
 12 24 10 9.58 0.00
 12 24 11 -3.52 0.00
 12 24 12 -9.66 0.00
 12 24 13 3.13 0.00
 12 24 14 -2.28 0.00
 12 24 15 2.75 0.00
 12 26 0 1.33 0.00
 12 26 1 -1.25 0.00
 12 26 2 5.20 0.00
 12 26 3 3.93 0.00
 12 26 4 1.86 0.00
 12 26 5 2.86 0.00
 12 26 6 -4.30 0.00
 12 26 7 -4.95 0.00
 12 26 8 1.02 0.00
 12 26 9 0.04 0.00
 12 26 10 -1.70 0.00
 12 26 11 1.28 0.00
 12 26 12 -2.18 0.00
 12 26 13 4.32 0.00
 12 26 14 -5.33 0.00
 12 28 0 -11.23 0.00
 12 28 1 -7.66 0.00
 12 28 2 0.83 0.00
 12 28 3 2.90 0.00
 12 28 4 -6.01 0.00
 12 28 5 5.41 0.00
 12 28 6 7.39 0.00
 12 28 7 -2.76 0.00
 12 28 8 -12.45 0.00
 12 28 9 10.27 0.00
 12 28 10 -6.30 0.00
 12 28 11 10.96 0.00
 12 28 12 15.66 0.00
 12 28 13 -0.23 0.00
 12 28 14 9.39 0.00
 12 30 0 -0.37 0.00
 12 30 1 -7.43 0.00
 12 30 2 1.83 0.00
 12 30 3 -2.42 0.00
 12 30 4 -2.26 0.00
 12 30 5 -2.56 0.00
 12 30 6 -7.18 0.00
 12 30 7 5.04 0.00
 12 30 8 3.72 0.00
 12 30 9 -5.34 0.00
 12 30 10 -5.93 0.00
 12 30 11 -7.74 0.00
 12 30 12 -1.90 0.00
 12 30 13 3.94 0.00
 12 32 0 4.18 0.00
 12 32 1 0.59 0.00
 12 32 2 -5.44 0.00
 12 32 3 5.24 0.00
 12 32 4 4.24 0.00
 12 32 5 -5.38 0.00
 12 32 6 -8.07 0.00
 12 32 7 -2.34 0.00
 12 32 8 4.90 0.00
 12 32 9 -0.38 0.00
 12 32 10 2.43 0.00
 12 32 11 3.99 0.00
 12 32 12 2.17 0.00
 12 34 0 -3.48 0.00
 12 34 1 -2.50 0.00
 12 34 2 0.42 0.00
 12 34 3 -0.77 0.00
 12 34 4 -0.80 0.00
 12 34 5 5.14 0.00
 12 34 6 1.44 0.00
 12 34 7 -2.02 0.00
 12 34 8 -3.48 0.00
 12 34 9 2.90 0.00
 12 34 10 4.12 0.00
 12 34 11 -2.86 0.00
 12 36 0 8.41 0.00
 12 36 1 2.66 0.00
 12 36 2 2.18 0.00
 12 36 3 -6.26 0.00
 12 36 4 3.41 0.00
 12 36 5 3.77 0.00
 12 36 6 4.00 0.00
 12 36 7 4.55 0.00
 12 36 8 -1.18 0.00
 12 36 9 -3.64 0.00
 12 38 0 3.89 0.00
 12 38 1 -1.21 0.00
 12 38 2 -8.82 0.00
 12 38 3 -0.15 0.00
 12 38 4 4.51 0.00
 12 38 5 -4.43 0.00
 12 38 6 -2.76 0.00
 12 38 7 5.14 0.00
 12 38 8 0.78 0.00
 12 40 0 1.82 0.00
 12 40 1 9.00 0.00
 12 40 2 5.25 0.00
 12 40 3 16.22 0.00
 12 40 4 -3.18 0.00
 12 40 5 -18.21 0.00
 12 40 6 5.46 0.00
 12 40 7 3.79 0.00
 12 42 0 -2.96 0.00
 12 42 1 -1.75 0.00
 12 42 2 -3.53 0.00
 12 42 3 11.96 0.00
 12 42 4 7.88 0.00
 12 42 5 -11.72 0.00
 12 42 6 -9.43 0.00
 12 44 2 -0.71 0.00
 12 44 3 8.90 0.00
 13 1 0 -14.65 0.00
 13 1 1 7.04 0.00
 13 1 2 -16.54 0.00
 13 1 3 7.62 0.00
 13 1 4 16.24 0.00
 13 1 5 1.43 0.00
 13 1 6 -6.54 0.00
 13 1 7 6.62 0.00
 13 1 8 1.46 0.00
 13 1 9 8.66 0.00
 13 1 10 18.15 0.00
 13 1 11 -7.13 0.00
 13 1 12 -7.80 0.00
 13 1 13 7.83 0.00
 13 1 14 9.18 0.00
 13 1 15 -15.90 0.00
 13 1 16 -3.61 0.00
 13 1 17 0.50 0.00
 13 3 0 -12.57 0.00
 13 3 1 -4.16 0.00
 13 3 2 -0.20 0.00
 13 3 3 -0.96 0.00
 13 3 4 3.01 0.00
 13 3 5 -3.03 0.00
 13 3 6 19.48 0.00
 13 3 7 -10.53 0.00
 13 3 8 -11.49 0.00
 13 3 9 8.03 0.00
 13 3 10 1.37 0.00
 13 3 11 -5.70 0.00
 13 3 12 1.26 0.00
 13 3 13 2.08 0.00
 13 3 14 -5.18 0.00
 13 3 15 0.49 0.00
 13 3 16 12.64 0.00
 13 3 17 14.35 0.00
 13 5 0 -17.18 0.00
 13 5 1 -11.25 0.00
 13 5 2 -4.07 0.00
 13 5 3 17.46 0.00
 13 5 4 4.17 0.00
 13 5 5 16.76 0.00
 13 5 6 2.37 0.00
 13 5 7 14.82 0.00
 13 5 8 4.45 0.00
 13 5 9 -0.04 0.00
 13 5 10 4.97 0.00
 13 5 11 3.89 0.00
 13 5 12 6.50 0.00
 13 5 13 4.20 0.00
 13 5 14 1.01 0.00
 13 5 15 7.51 0.00
 13 5 16 -2.78 0.00
 13 5 17 6.42 0.00
 13 7 0 -5.29 0.00
 13 7 1 -12.07 0.00
 13 7 2 -8.11 0.00
 13 7 3 -9.92 0.00
 13 7 4 0.41 0.00
 13 7 5 -6.49 0.00
 13 7 6 -2.16 0.00
 13 7 7 -12.79 0.00
 13 7 8 0.52 0.00
 13 7 9 -6.42 0.00
 13 7 10 -1.14 0.00
 13 7 11 -5.11 0.00
 13 7 12 -6.56 0.00
 13 7 13 -2.08 0.00
 13 7 14 -3.20 0.00
 13 7 15 0.14 0.00
 13 7 16 1.14 0.00
 13 7 17 -4.15 0.00
 13 9 0 -15.00 0.00
 13 9 1 -9.35 0.00
 13 9 2 1.54 0.00
 13 9 3 24.34 0.00
 13 9 4 2.68 0.00
 13 9 5 4.02 0.00
 13 9 6 15.42 0.00
 13 9 7 4.76 0.00
 13 9 8 2.19 0.00
 13 9 9 5.46 0.00
 13 9 10 8.68 0.00
 13 9 11 1.49 0.00
 13 9 12 4.39 0.00
 13 9 13 -4.13 0.00
 13 9 14 -4.35 0.00
 13 9 15 1.12 0.00
 13 9 16 3.01 0.00
 13 9 17 7.32 0.00
 13 11 0 -13.43 0.00
 13 11 1 -2.69 0.00
 13 11 2 -5.81 0.00
 13 11 3 0.76 0.00
 13 11 4 -3.53 0.00
 13 11 5 -6.52 0.00
 13 11 6 -4.22 0.00
 13 11 7 -12.92 0.00
 13 11 8 0.32 0.00
 13 11 9 9.01 0.00
 13 11 10 11.91 0.00
 13 11 11 -10.51 0.00
 13 11 12 -0.01 0.00
 13 11 13 10.18 0.00
 13 11 14 -8.08 0.00
 13 11 15 -4.19 0.00
 13 11 16 -0.36 0.00
 13 11 17 -10.93 0.00
 13 13 0 -15.72 0.00
 13 13 1 7.46 0.00
 13 13 2 10.98 0.00
 13 13 3 1.58 0.00
 13 13 4 -2.77 0.00
 13 13 5 11.49 0.00
 13 13 6 -0.14 0.00
 13 13 7 -2.27 0.00
 13 13 8 -2.23 0.00
 13 13 9 5.22 0.00
 13 13 10 2.54 0.00
 13 13 11 -6.42 0.00
 13 13 12 -4.56 0.00
 13 13 13 -8.54 0.00
 13 13 14 3.38 0.00
 13 13 15 -10.20 0.00
 13 13 16 -7.59 0.00
 13 13 17 10.75 0.00
 13 15 0 -3.30 0.00
 13 15 1 1.29 0.00
 13 15 2 -5.13 0.00
 13 15 3 3.90 0.00
 13 15 4 5.68 0.00
 13 15 5 3.20 0.00
 13 15 6 -9.33 0.00
 13 15 7 -8.33 0.00
 13 15 8 7.28 0.00
 13 15 9 -6.06 0.00
 13 15 10 6.69 0.00
 13 15 11 -0.48 0.00
 13 15 12 -0.08 0.00
 13 15 13 11.52 0.00
 13 15 14 3.85 0.00
 13 15 15 -3.20 0.00
 13 15 16 -4.42 0.00
 13 17 0 7.68 0.00
 13 17 1 -0.93 0.00
 13 17 2 13.47 0.00
 13 17 3 -9.40 0.00
 13 17 4 6.97 0.00
 13 17 5 -5.68 0.00
 13 17 6 -9.37 0.00
 13 17 7 -6.17 0.00
 13 17 8 0.01 0.00
 13 17 9 -2.52 0.00
 13 17 10 4.94 0.00
 13 17 11 -5.17 0.00
 13 17 12 7.77 0.00
 13 17 13 3.75 0.00
 13 17 14 9.53 0.00
 13 17 15 -0.30 0.00
 13 17 16 -4.50 0.00
 13 19 0 0.75 0.00
 13 19 1 -4.66 0.00
 13 19 2 1.62 0.00
 13 19 3 9.58 0.00
 13 19 4 -10.89 0.00
 13 19 5 -8.89 0.00
 13 19 6 5.34 0.00
 13 19 7 -2.12 0.00
 13 19 8 -12.08 0.00
 13 19 9 4.63 0.00
 13 19 10 -10.40 0.00
 13 19 11 -6.62 0.00
 13 19 12 -8.54 0.00
 13 19 13 -2.82 0.00
 13 19 14 -6.37 0.00
 13 19 15 10.38 0.00
 13 19 16 1.03 0.00
 13 21 0 22.60 0.00
 13 21 1 2.33 0.00
 13 21 2 11.54 0.00
 13 21 3 -3.75 0.00
 13 21 4 19.01 0.00
 13 21 5 -6.70 0.00
 13 21 6 -10.41 0.00
 13 21 7 -0.68 0.00
 13 21 8 9.81 0.00
 13 21 9 -15.27 0.00
 13 21 10 -1.52 0.00
 13 21 11 -3.24 0.00
 13 21 12 22.76 0.00
 13 21 13 -4.30 0.00
 13 21 14 9.34 0.00
 13 21 15 24.42 0.00
 13 23 0 -1.91 0.00
 13 23 1 1.97 0.00
 13 23 2 6.54 0.00
 13 23 3 18.35 0.00
 13 23 4 -5.71 0.00
 13 23 5 -18.43 0.00
 13 23 6 -2.35 0.00
 13 23 7 3.45 0.00
 13 23 8 3.79 0.00
 13 23 9 -5.70 0.00
 13 23 10 -2.69 0.00
 13 23 11 6.70 0.00
 13 23 12 -11.26 0.00
 13 23 13 -0.60 0.00
 13 23 14 -5.85 0.00
 13 23 15 8.01 0.00
 13 25 0 -6.39 0.00
 13 25 1 -3.47 0.00
 13 25 2 11.83 0.00
 13 25 3 2.22 0.00
 13 25 4 -5.07 0.00
 13 25 5 -2.30 0.00
 13 25 6 8.31 0.00
 13 25 7 -0.73 0.00
 13 25 8 1.58 0.00
 13 25 9 1.39 0.00
 13 25 10 -2.42 0.00
 13 25 11 -4.50 0.00
 13 25 12 0.09 0.00
 13 25 13 3.75 0.00
 13 25 14 8.22 0.00
 13 27 0 0.42 0.00
 13 27 1 14.95 0.00
 13 27 2 6.08 0.00
 13 27 3 -7.27 0.00
 13 27 4 5.43 0.00
 13 27 5 5.52 0.00
 13 27 6 -2.57 0.00
 13 27 7 0.91 0.00
 13 27 8 7.02 0.00
 13 27 9 2.80 0.00
 13 27 10 5.13 0.00
 13 27 11 -17.60 0.00
 13 27 12 1.26 0.00
 13 27 13 8.38 0.00
 13 27 14 1.85 0.00
 13 29 0 -6.59 0.00
 13 29 1 2.02 0.00
 13 29 2 8.71 0.00
 13 29 3 4.81 0.00
 13 29 4 -8.37 0.00
 13 29 5 -2.07 0.00
 13 29 6 -0.25 0.00
 13 29 7 -2.74 0.00
 13 29 8 -7.10 0.00
 13 29 9 2.95 0.00
 13 29 10 1.95 0.00
 13 29 11 5.39 0.00
 13 29 12 -19.81 0.00
 13 29 13 -7.52 0.00
 13 31 0 1.60 0.00
 13 31 1 -9.65 0.00
 13 31 2 -1.38 0.00
 13 31 3 0.97 0.00
 13 31 4 0.35 0.00
 13 31 5 1.00 0.00
 13 31 6 -3.48 0.00
 13 31 7 -10.78 0.00
 13 31 8 -0.39 0.00
 13 31 9 1.52 0.00
 13 31 10 -1.22 0.00
 13 31 11 0.15 0.00
 13 31 12 2.73 0.00
 13 33 0 6.10 0.00
 13 33 1 3.64 0.00
 13 33 2 -4.45 0.00
 13 33 3 -4.96 0.00
 13 33 4 10.27 0.00
 13 33 5 0.84 0.00
 13 33 6 -1.58 0.00
 13 33 7 2.85 0.00
 13 33 8 2.39 0.00
 13 33 9 1.87 0.00
 13 33 10 3.17 0.00
 13 33 11 -9.25 0.00
 13 35 0 7.78 0.00
 13 35 1 -4.27 0.00
 13 35 2 -1.62 0.00
 13 35 3 1.54 0.00
 13 35 4 -7.04 0.00
 13 35 5 -5.84 0.00
 13 35 6 -3.63 0.00
 13 35 7 0.22 0.00
 13 35 8 2.10 0.00
 13 35 9 -10.18 0.00
 13 35 10 4.50 0.00
 13 37 0 1.73 0.00
 13 37 1 3.14 0.00
 13 37 2 0.50 0.00
 13 37 3 -14.86 0.00
 13 37 4 -4.27 0.00
 13 37 5 -0.68 0.00
 13 37 6 2.72 0.00
 13 37 7 -3.04 0.00
 13 37 8 1.75 0.00
 13 37 9 2.20 0.00
 13 39 0 -16.37 0.00
 13 39 1 8.27 0.00
 13 39 2 8.65 0.00
 13 39 3 -1.45 0.00
 13 39 4 -1.42 0.00
 13 39 5 6.39 0.00
 13 39 6 9.70 0.00
 13 39 7 5.73 0.00
 13 39 8 -5.32 0.00
 13 41 0 4.18 0.00
 13 41 1 1.51 0.00
 13 41 2 3.32 0.00
 13 41 3 -0.93 0.00
 13 41 4 -18.77 0.00
 13 41 5 -2.19 0.00
 13 41 6 -15.98 0.00
 13 43 1 5.86 0.00
 13 43 2 -3.84 0.00
 13 43 3 -4.73 0.00
 13 43 4 15.73 0.00
 14 0 0 -16.99 0.00
 14 0 2 32.76 0.00
 14 0 4 -14.82 0.00
 14 0 6 20.06 0.00
 14 0 8 -12.33 0.00
 14 0 10 1.05 0.00
 14 0 12 -8.77 0.00
 14 0 14 16.27 0.00
 14 0 16 -19.99 0.00
 14 2 0 -21.75 0.00
 14 2 1 10.56 0.00
 14 2 2 -1.33 0.00
 14 2 3 -5.16 0.00
 14 2 4 -3.37 0.00
 14 2 5 1.76 0.00
 14 2 6 -16.33 0.00
 14 2 7 2.23 0.00
 14 2 8 -0.09 0.00
 14 2 9 3.77 0.00
 14 2 10 4.86 0.00
 14 2 11 2.08 0.00
 14 2 12 4.12 0.00
 14 2 13 -0.10 0.00
 14 2 14 -1.11 0.00
 14 2 15 -0.76 0.00
 14 2 16 12.06 0.00
 14 2 17 11.48 0.00
 14 4 0 26.41 0.00
 14 4 1 -4.91 0.00
 14 4 2 0.15 0.00
 14 4 3 -4.01 0.00
 14 4 4 11.47 0.00
 14 4 5 -0.58 0.00
 14 4 6 -6.57 0.00
 14 4 7 -0.36 0.00
 14 4 8 6.83 0.00
 14 4 9 -1.58 0.00
 14 4 10 -1.72 0.00
 14 4 11 10.01 0.00
 14 4 12 0.51 0.00
 14 4 13 -2.41 0.00
 14 4 14 1.79 0.00
 14 4 15 11.24 0.00
 14 4 16 2.50 0.00
 14 4 17 0.62 0.00
 14 6 0 -3.25 0.00
 14 6 1 5.02 0.00
 14 6 2 28.23 0.00
 14 6 3 0.84 0.00
 14 6 4 -7.44 0.00
 14 6 5 3.32 0.00
 14 6 6 10.26 0.00
 14 6 7 -5.27 0.00
 14 6 8 -5.55 0.00
 14 6 9 -9.01 0.00
 14 6 10 8.48 0.00
 14 6 11 3.30 0.00
 14 6 12 5.03 0.00
 14 6 13 3.62 0.00
 14 6 14 7.98 0.00
 14 6 15 0.41 0.00
 14 6 16 -3.96 0.00
 14 6 17 -4.65 0.00
 14 8 0 11.66 0.00
 14 8 1 14.06 0.00
 14 8 2 -0.23 0.00
 14 8 3 -5.20 0.00
 14 8 4 14.28 0.00
 14 8 5 -1.84 0.00
 14 8 6 -4.12 0.00
 14 8 7 6.39 0.00
 14 8 8 -2.99 0.00
 14 8 9 2.94 0.00
 14 8 10 4.57 0.00
 14 8 11 -7.69 0.00
 14 8 12 -1.74 0.00
 14 8 13 6.78 0.00
 14 8 14 6.45 0.00
 14 8 15 -0.81 0.00
 14 8 16 6.96 0.00
 14 8 17 9.19 0.00
 14 10 0 11.24 0.00
 14 10 1 -6.96 0.00
 14 10 2 -18.74 0.00
 14 10 3 12.64 0.00
 14 10 4 -1.19 0.00
 14 10 5 -9.21 0.00
 14 10 6 -5.60 0.00
 14 10 7 -8.96 0.00
 14 10 8 2.75 0.00
 14 10 9 -2.46 0.00
 14 10 10 0.22 0.00
 14 10 11 -13.90 0.00
 14 10 12 -0.97 0.00
 14 10 13 -1.50 0.00
 14 10 14 -7.69 0.00
 14 10 15 -8.26 0.00
 14 10 16 -2.34 0.00
 14 12 0 8.79 0.00
 14 12 1 3.34 0.00
 14 12 2 -5.06 0.00
 14 12 3 3.54 0.00
 14 12 4 9.01 0.00
 14 12 5 -2.76 0.00
 14 12 6 4.90 0.00
 14 12 7 5.44 0.00
 14 12 8 1.02 0.00
 14 12 9 -0.98 0.00
 14 12 10 -5.54 0.00
 14 12 11 -1.90 0.00
 14 12 12 16.30 0.00
 14 12 13 -5.89 0.00
 14 12 14 -10.19 0.00
 14 12 15 -3.73 0.00
 14 12 16 -4.71 0.00
 14 14 0 -6.03 0.00
 14 14 1 6.95 0.00
 14 14 2 -12.60 0.00
 14 14 3 -6.86 0.00
 14 14 4 -19.01 0.00
 14 14 5 -2.16 0.00
 14 14 6 -6.36 0.00
 14 14 7 -6.80 0.00
 14 14 8 -1.04 0.00
 14 14 9 -10.70 0.00
 14 14 10 -9.22 0.00
 14 14 11 -9.41 0.00
 14 14 12 -5.25 0.00
 14 14 13 4.72 0.00
 14 14 14 5.76 0.00
 14 14 15 -1.10 0.00
 14 14 16 -0.29 0.00
 14 16 0 15.50 0.00
 14 16 1 2.26 0.00
 14 16 2 -0.07 0.00
 14 16 3 -1.85 0.00
 14 16 4 0.73 0.00
 14 16 5 0.36 0.00
 14 16 6 8.37 0.00
 14 16 7 8.66 0.00
 14 16 8 5.90 0.00
 14 16 9 -3.16 0.00
 14 16 10 -2.68 0.00
 14 16 11 -2.76 0.00
 14 16 12 -9.40 0.00
 14 16 13 -2.45 0.00
 14 16 14 -2.09 0.00
 14 16 15 -0.69 0.00
 14 16 16 -4.86 0.00
 14 18 0 4.01 0.00
 14 18 1 8.43 0.00
 14 18 2 -0.04 0.00
 14 18 3 -2.96 0.00
 14 18 4 -4.32 0.00
 14 18 5 -6.12 0.00
 14 18 6 9.19 0.00
 14 18 7 5.43 0.00
 14 18 8 -7.73 0.00
 14 18 9 -13.14 0.00
 14 18 10 19.84 0.00
 14 18 11 -0.19 0.00
 14 18 12 1.10 0.00
 14 18 13 -0.99 0.00
 14 18 14 7.42 0.00
 14 18 15 -5.76 0.00
 14 18 16 4.39 0.00
 14 20 0 10.11 0.00
 14 20 1 2.52 0.00
 14 20 2 10.39 0.00
 14 20 3 5.42 0.00
 14 20 4 -3.84 0.00
 14 20 5 10.21 0.00
 14 20 6 16.40 0.00
 14 20 7 -1.75 0.00
 14 20 8 11.09 0.00
 14 20 9 0.39 0.00
 14 20 10 -11.48 0.00
 14 20 11 -1.56 0.00
 14 20 12 -13.23 0.00
 14 20 13 4.92 0.00
 14 20 14 -0.62 0.00
 14 20 15 4.83 0.00
 14 22 0 15.22 0.00
 14 22 1 -6.10 0.00
 14 22 2 -12.61 0.00
 14 22 3 1.98 0.00
 14 22 4 16.71 0.00
 14 22 5 -2.77 0.00
 14 22 6 11.46 0.00
 14 22 7 -14.92 0.00
 14 22 8 1.77 0.00
 14 22 9 3.10 0.00
 14 22 10 3.72 0.00
 14 22 11 -0.81 0.00
 14 22 12 1.87 0.00
 14 22 13 -7.67 0.00
 14 22 14 14.96 0.00
 14 22 15 0.05 0.00
 14 24 0 29.58 0.00
 14 24 1 7.47 0.00
 14 24 2 -3.62 0.00
 14 24 3 -4.64 0.00
 14 24 4 -0.54 0.00
 14 24 5 7.24 0.00
 14 24 6 5.45 0.00
 14 24 7 2.00 0.00
 14 24 8 6.56 0.00
 14 24 9 2.67 0.00
 14 24 10 -10.22 0.00
 14 24 11 -10.97 0.00
 14 24 12 -3.88 0.00
 14 24 13 9.14 0.00
 14 24 14 -0.44 0.00
 14 26 0 -18.94 0.00
 14 26 1 -10.20 0.00
 14 26 2 2.59 0.00
 14 26 3 -3.33 0.00
 14 26 4 4.42 0.00
 14 26 5 7.17 0.00
 14 26 6 -0.28 0.00
 14 26 7 -7.24 0.00
 14 26 8 3.12 0.00
 14 26 9 2.85 0.00
 14 26 10 8.35 0.00
 14 26 11 8.54 0.00
 14 26 12 -11.27 0.00
 14 26 13 3.24 0.00
 14 26 14 9.09 0.00
 14 28 0 0.12 0.00
 14 28 1 0.72 0.00
 14 28 2 4.59 0.00
 14 28 3 0.33 0.00
 14 28 4 -0.46 0.00
 14 28 5 8.09 0.00
 14 28 6 -5.33 0.00
 14 28 7 4.11 0.00
 14 28 8 -8.09 0.00
 14 28 9 -4.31 0.00
 14 28 10 -5.21 0.00
 14 28 11 -0.17 0.00
 14 28 12 -2.27 0.00
 14 28 13 7.30 0.00
 14 30 0 -2.42 0.00
 14 30 1 -8.34 0.00
 14 30 2 -2.07 0.00
 14 30 3 4.46 0.00
 14 30 4 0.90 0.00
 14 30 5 -2.21 0.00
 14 30 6 2.02 0.00
 14 30 7 -7.00 0.00
 14 30 8 -4.90 0.00
 14 30 9 -1.12 0.00
 14 30 10 -0.45 0.00
 14 30 11 2.04 0.00
 14 30 12 4.88 0.00
 14 32 0 2.75 0.00
 14 32 1 -6.32 0.00
 14 32 2 -0.54 0.00
 14 32 3 -3.84 0.00
 14 32 4 2.21 0.00
 14 32 5 3.96 0.00
 14 32 6 -11.23 0.00
 14 32 7 1.90 0.00
 14 32 8 5.37 0.00
 14 32 9 -0.04 0.00
 14 32 10 -4.19 0.00
 14 32 11 -0.46 0.00
 14 34 0 5.70 0.00
 14 34 1 1.10 0.00
 14 34 2 -3.86 0.00
 14 34 3 12.08 0.00
 14 34 4 6.83 0.00
 14 34 5 -8.69 0.00
 14 34 6 0.91 0.00
 14 34 7 5.43 0.00
 14 34 8 -4.68 0.00
 14 34 9 -8.59 0.00
 14 34 10 5.45 0.00
 14 36 0 6.77 0.00
 14 36 1 3.59 0.00
 14 36 2 2.61 0.00
 14 36 3 -7.54 0.00
 14 36 4 5.08 0.00
 14 36 5 -1.18 0.00
 14 36 6 -7.33 0.00
 14 36 7 2.49 0.00
 14 36 8 3.48 0.00
 14 36 9 3.07 0.00
 14 38 0 -6.04 0.00
 14 38 1 1.16 0.00
 14 38 2 -3.92 0.00
 14 38 3 1.09 0.00
 14 38 4 0.57 0.00
 14 38 5 -1.68 0.00
 14 38 6 3.26 0.00
 14 38 7 11.32 0.00
 14 38 8 -0.12 0.00
 14 40 0 5.12 0.00
 14 40 1 -4.80 0.00
 14 40 2 -1.07 0.00
 14 40 3 11.33 0.00
 14 40 4 0.99 0.00
 14 40 5 -14.12 0.00
 14 40 6 1.76 0.00
 14 42 0 -6.53 0.00
 14 42 1 5.15 0.00
 14 42 2 1.67 0.00
 14 42 3 21.85 0.00
 14 42 4 -4.17 0.00
 15 1 0 -19.19 0.00
 15 1 1 -4.61 0.00
 15 1 2 -2.68 0.00
 15 1 3 -17.65 0.00
 15 1 4 3.77 0.00
 15 1 5 10.31 0.00
 15 1 6 -3.01 0.00
 15 1 7 -17.53 0.00
 15 1 8 -9.01 0.00
 15 1 9 7.72 0.00
 15 1 10 20.19 0.00
 15 1 11 2.76 0.00
 15 1 12 -10.60 0.00
 15 1 13 -9.75 0.00
 15 1 14 -2.00 0.00
 15 1 15 -4.28 0.00
 15 1 16 8.00 0.00
 15 3 0 -4.63 0.00
 15 3 1 6.32 0.00
 15 3 2 -10.97 0.00
 15 3 3 11.68 0.00
 15 3 4 18.37 0.00
 15 3 5 -0.72 0.00
 15 3 6 -7.87 0.00
 15 3 7 1.46 0.00
 15 3 8 4.01 0.00
 15 3 9 3.13 0.00
 15 3 10 10.44 0.00
 15 3 11 1.24 0.00
 15 3 12 2.61 0.00
 15 3 13 2.62 0.00
 15 3 14 6.02 0.00
 15 3 15 2.62 0.00
 15 3 16 -11.53 0.00
 15 5 0 -1.42 0.00
 15 5 1 -4.95 0.00
 15 5 2 -3.79 0.00
 15 5 3 -7.79 0.00
 15 5 4 -2.85 0.00
 15 5 5 3.21 0.00
 15 5 6 1.46 0.00
 15 5 7 -2.28 0.00
 15 5 8 -13.18 0.00
 15 5 9 2.84 0.00
 15 5 10 -1.57 0.00
 15 5 11 1.15 0.00
 15 5 12 -3.45 0.00
 15 5 13 6.19 0.00
 15 5 14 2.35 0.00
 15 5 15 -2.06 0.00
 15 5 16 3.69 0.00
 15 7 0 -14.12 0.00
 15 7 1 -20.79 0.00
 15 7 2 4.82 0.00
 15 7 3 14.28 0.00
 15 7 4 4.25 0.00
 15 7 5 7.37 0.00
 15 7 6 -0.68 0.00
 15 7 7 1.96 0.00
 15 7 8 13.79 0.00
 15 7 9 -10.32 0.00
 15 7 10 4.09 0.00
 15 7 11 2.25 0.00
 15 7 12 2.07 0.00
 15 7 13 -11.83 0.00
 15 7 14 2.88 0.00
 15 7 15 -5.41 0.00
 15 7 16 2.69 0.00
 15 9 0 6.80 0.00
 15 9 1 8.80 0.00
 15 9 2 -7.21 0.00
 15 9 3 -0.14 0.00
 15 9 4 2.13 0.00
 15 9 5 -7.41 0.00
 15 9 6 -8.57 0.00
 15 9 7 5.65 0.00
 15 9 8 -3.97 0.00
 15 9 9 -0.59 0.00
 15 9 10 0.30 0.00
 15 9 11 -1.41 0.00
 15 9 12 -2.14 0.00
 15 9 13 4.14 0.00
 15 9 14 -2.30 0.00
 15 9 15 -1.94 0.00
 15 9 16 -11.66 0.00
 15 11 0 -13.10 0.00
 15 11 1 -6.32 0.00
 15 11 2 8.01 0.00
 15 11 3 0.74 0.00
 15 11 4 -10.84 0.00
 15 11 5 12.17 0.00
 15 11 6 8.12 0.00
 15 11 7 -2.51 0.00
 15 11 8 6.29 0.00
 15 11 9 0.39 0.00
 15 11 10 3.27 0.00
 15 11 11 -1.69 0.00
 15 11 12 5.71 0.00
 15 11 13 -1.50 0.00
 15 11 14 -4.54 0.00
 15 11 15 5.26 0.00
 15 11 16 6.01 0.00
 15 13 0 -3.91 0.00
 15 13 1 -3.15 0.00
 15 13 2 13.40 0.00
 15 13 3 11.01 0.00
 15 13 4 -9.27 0.00
 15 13 5 11.14 0.00
 15 13 6 -7.04 0.00
 15 13 7 -20.03 0.00
 15 13 8 -0.94 0.00
 15 13 9 2.32 0.00
 15 13 10 6.37 0.00
 15 13 11 5.35 0.00
 15 13 12 -19.49 0.00
 15 13 13 -14.72 0.00
 15 13 14 4.51 0.00
 15 13 15 -2.08 0.00
 15 13 16 -7.26 0.00
 15 15 0 15.34 0.00
 15 15 1 -2.32 0.00
 15 15 2 3.44 0.00
 15 15 3 -3.69 0.00
 15 15 4 0.17 0.00
 15 15 5 -0.46 0.00
 15 15 6 -0.12 0.00
 15 15 7 -9.99 0.00
 15 15 8 0.48 0.00
 15 15 9 5.47 0.00
 15 15 10 4.50 0.00
 15 15 11 -3.80 0.00
 15 15 12 7.93 0.00
 15 15 13 20.48 0.00
 15 15 14 2.17 0.00
 15 15 15 2.72 0.00
 15 15 16 -5.67 0.00
 15 17 0 13.44 0.00
 15 17 1 -5.21 0.00
 15 17 2 -4.06 0.00
 15 17 3 2.83 0.00
 15 17 4 6.61 0.00
 15 17 5 -4.24 0.00
 15 17 6 3.05 0.00
 15 17 7 -8.48 0.00
 15 17 8 -5.81 0.00
 15 17 9 -8.15 0.00
 15 17 10 -2.64 0.00
 15 17 11 -12.24 0.00
 15 17 12 -0.32 0.00
 15 17 13 9.86 0.00
 15 17 14 6.28 0.00
 15 17 15 0.78 0.00
 15 19 0 8.41 0.00
 15 19 1 -5.83 0.00
 15 19 2 10.41 0.00
 15 19 3 -6.35 0.00
 15 19 4 2.76 0.00
 15 19 5 -13.38 0.00
 15 19 6 -2.15 0.00
 15 19 7 2.77 0.00
 15 19 8 1.33 0.00
 15 19 9 6.44 0.00
 15 19 10 -6.85 0.00
 15 19 11 -10.02 0.00
 15 19 12 5.39 0.00
 15 19 13 -3.01 0.00
 15 19 14 -1.07 0.00
 15 19 15 9.97 0.00
 15 21 0 2.35 0.00
 15 21 1 5.10 0.00
 15 21 2 10.61 0.00
 15 21 3 -0.29 0.00
 15 21 4 -1.60 0.00
 15 21 5 -3.75 0.00
 15 21 6 1.37 0.00
 15 21 7 -2.07 0.00
 15 21 8 -4.19 0.00
 15 21 9 -19.98 0.00
 15 21 10 1.33 0.00
 15 21 11 -5.77 0.00
 15 21 12 3.64 0.00
 15 21 13 -0.83 0.00
 15 21 14 3.30 0.00
 15 21 15 27.28 0.00
 15 23 0 2.76 0.00
 15 23 1 6.64 0.00
 15 23 2 9.78 0.00
 15 23 3 0.93 0.00
 15 23 4 3.01 0.00
 15 23 5 -10.13 0.00
 15 23 6 -8.21 0.00
 15 23 7 -3.71 0.00
 15 23 8 15.89 0.00
 15 23 9 2.52 0.00
 15 23 10 0.29 0.00
 15 23 11 -6.01 0.00
 15 23 12 -5.09 0.00
 15 23 13 5.55 0.00
 15 23 14 -0.66 0.00
 15 25 0 -1.32 0.00
 15 25 1 -21.11 0.00
 15 25 2 -5.80 0.00
 15 25 3 5.75 0.00
 15 25 4 -0.06 0.00
 15 25 5 -2.77 0.00
 15 25 6 6.74 0.00
 15 25 7 2.51 0.00
 15 25 8 -3.23 0.00
 15 25 9 -3.00 0.00
 15 25 10 0.66 0.00
 15 25 11 -5.11 0.00
 15 25 12 4.54 0.00
 15 25 13 2.85 0.00
 15 25 14 5.78 0.00
 15 27 0 -6.05 0.00
 15 27 1 -3.17 0.00
 15 27 2 14.92 0.00
 15 27 3 6.76 0.00
 15 27 4 2.19 0.00
 15 27 5 -5.91 0.00
 15 27 6 -0.55 0.00
 15 27 7 4.37 0.00
 15 27 8 8.66 0.00
 15 27 9 2.99 0.00
 15 27 10 6.57 0.00
 15 27 11 -7.28 0.00
 15 27 12 -8.37 0.00
 15 27 13 -9.34 0.00
 15 29 0 8.80 0.00
 15 29 1 4.83 0.00
 15 29 2 -1.26 0.00
 15 29 3 -8.77 0.00
 15 29 4 -12.52 0.00
 15 29 5 6.29 0.00
 15 29 6 -2.08 0.00
 15 29 7 -6.94 0.00
 15 29 8 -1.08 0.00
 15 29 9 3.69 0.00
 15 29 10 -9.68 0.00
 15 29 11 2.87 0.00
 15 29 12 3.22 0.00
 15 31 0 0.55 0.00
 15 31 1 1.96 0.00
 15 31 2 1.21 0.00
 15 31 3 0.25 0.00
 15 31 4 4.62 0.00
 15 31 5 1.42 0.00
 15 31 6 6.48 0.00
 15 31 7 -6.31 0.00
 15 31 8 -1.91 0.00
 15 31 9 0.34 0.00
 15 31 10 1.44 0.00
 15 31 11 5.03 0.00
 15 33 0 1.25 0.00
 15 33 1 -0.15 0.00
 15 33 2 -1.35 0.00
 15 33 3 -5.06 0.00
 15 33 4 7.09 0.00
 15 33 5 -8.33 0.00
 15 33 6 -4.13 0.00
 15 33 7 3.24 0.00
 15 33 8 2.39 0.00
 15 33 9 -0.22 0.00
 15 33 10 -7.05 0.00
 15 35 0 0.37 0.00
 15 35 1 3.52 0.00
 15 35 2 4.55 0.00
 15 35 3 -12.00 0.00
 15 35 4 -6.95 0.00
 15 35 5 7.18 0.00
 15 35 6 6.67 0.00
 15 35 7 -6.78 0.00
 15 35 8 -0.86 0.00
 15 35 9 -2.37 0.00
 15 37 0 -7.21 0.00
 15 37 1 2.62 0.00
 15 37 2 3.47 0.00
 15 37 3 -11.09 0.00
 15 37 4 0.82 0.00
 15 37 5 -3.84 0.00
 15 37 6 1.49 0.00
 15 37 7 7.63 0.00
 15 37 8 2.69 0.00
 15 39 0 -4.55 0.00
 15 39 1 -3.12 0.00
 15 39 2 5.78 0.00
 15 39 3 4.80 0.00
 15 39 4 -9.32 0.00
 15 39 5 -1.47 0.00
 15 39 6 6.37 0.00
 15 39 7 2.05 0.00
 15 41 0 -19.89 0.00
 15 41 1 0.56 0.00
 15 41 2 -0.60 0.00
 15 41 3 -0.38 0.00
 15 41 4 11.78 0.00
 16 0 0 6.90 0.00
 16 0 2 -3.58 0.00
 16 0 4 -3.77 0.00
 16 0 6 3.13 0.00
 16 0 8 -1.96 0.00
 16 0 10 -3.31 0.00
 16 0 12 0.37 0.00
 16 0 14 -16.09 0.00
 16 0 16 2.79 0.00
 16 2 0 3.13 0.00
 16 2 1 -11.70 0.00
 16 2 2 -8.03 0.00
 16 2 3 4.59 0.00
 16 2 4 5.54 0.00
 16 2 5 -13.22 0.00
 16 2 6 -13.84 0.00
 16 2 7 13.97 0.00
 16 2 8 -2.13 0.00
 16 2 9 -2.60 0.00
 16 2 10 -11.88 0.00
 16 2 11 5.29 0.00
 16 2 12 2.67 0.00
 16 2 13 1.33 0.00
 16 2 14 4.33 0.00
 16 2 15 15.77 0.00
 16 2 16 -5.35 0.00
 16 4 0 -12.18 0.00
 16 4 1 10.48 0.00
 16 4 2 30.13 0.00
 16 4 3 -0.70 0.00
 16 4 4 -7.98 0.00
 16 4 5 -5.01 0.00
 16 4 6 3.83 0.00
 16 4 7 3.24 0.00
 16 4 8 2.44 0.00
 16 4 9 -1.57 0.00
 16 4 10 8.03 0.00
 16 4 11 -8.98 0.00
 16 4 12 2.89 0.00
 16 4 13 8.65 0.00
 16 4 14 -1.04 0.00
 16 4 15 -9.39 0.00
 16 4 16 -0.32 0.00
 16 6 0 14.18 0.00
 16 6 1 -9.70 0.00
 16 6 2 -1.29 0.00
 16 6 3 -0.83 0.00
 16 6 4 -0.99 0.00
 16 6 5 7.23 0.00
 16 6 6 -7.69 0.00
 16 6 7 -3.94 0.00
 16 6 8 -8.40 0.00
 16 6 9 8.47 0.00
 16 6 10 -0.92 0.00
 16 6 11 8.67 0.00
 16 6 12 4.10 0.00
 16 6 13 -2.81 0.00
 16 6 14 -0.54 0.00
 16 6 15 9.44 0.00
 16 6 16 -6.35 0.00
 16 8 0 -1.60 0.00
 16 8 1 11.94 0.00
 16 8 2 12.74 0.00
 16 8 3 5.18 0.00
 16 8 4 7.31 0.00
 16 8 5 -1.94 0.00
 16 8 6 -6.28 0.00
 16 8 7 -4.92 0.00
 16 8 8 8.70 0.00
 16 8 9 -10.20 0.00
 16 8 10 3.42 0.00
 16 8 11 -10.74 0.00
 16 8 12 11.18 0.00
 16 8 13 8.80 0.00
 16 8 14 8.22 0.00
 16 8 15 -2.62 0.00
 16 8 16 7.13 0.00
 16 10 0 -7.38 0.00
 16 10 1 -5.03 0.00
 16 10 2 -6.71 0.00
 16 10 3 0.49 0.00
 16 10 4 -10.07 0.00
 16 10 5 8.12 0.00
 16 10 6 0.07 0.00
 16 10 7 -2.56 0.00
 16 10 8 -11.18 0.00
 16 10 9 12.80 0.00
 16 10 10 -13.82 0.00
 16 10 11 -12.22 0.00
 16 10 12 -8.00 0.00
 16 10 13 -4.72 0.00
 16 10 14 -3.18 0.00
 16 10 15 4.00 0.00
 16 10 16 -9.08 0.00
 16 12 0 10.65 0.00
 16 12 1 -2.71 0.00
 16 12 2 -20.41 0.00
 16 12 3 6.67 0.00
 16 12 4 8.48 0.00
 16 12 5 -7.92 0.00
 16 12 6 4.31 0.00
 16 12 7 -17.68 0.00
 16 12 8 -0.90 0.00
 16 12 9 -7.70 0.00
 16 12 10 -4.49 0.00
 16 12 11 2.60 0.00
 16 12 12 26.47 0.00
 16 12 13 -23.07 0.00
 16 12 14 -6.55 0.00
 16 12 15 0.50 0.00
 16 12 16 8.03 0.00
 16 14 0 5.29 0.00
 16 14 1 -4.37 0.00
 16 14 2 -2.49 0.00
 16 14 3 -7.22 0.00
 16 14 4 -2.93 0.00
 16 14 5 -3.10 0.00
 16 14 6 -10.45 0.00
 16 14 7 4.41 0.00
 16 14 8 -6.65 0.00
 16 14 9 5.04 0.00
 16 14 10 -13.24 0.00
 16 14 11 -18.15 0.00
 16 14 12 -23.91 0.00
 16 14 13 24.51 0.00
 16 14 14 -3.00 0.00
 16 14 15 -1.92 0.00
 16 14 16 1.87 0.00
 16 16 0 4.46 0.00
 16 16 1 -7.46 0.00
 16 16 2 2.49 0.00
 16 16 3 -4.51 0.00
 16 16 4 -7.34 0.00
 16 16 5 -7.62 0.00
 16 16 6 6.77 0.00
 16 16 7 3.65 0.00
 16 16 8 -0.67 0.00
 16 16 9 -9.83 0.00
 16 16 10 9.19 0.00
 16 16 11 -4.39 0.00
 16 16 12 0.96 0.00
 16 16 13 -16.70 0.00
 16 16 14 4.87 0.00
 16 16 15 -10.91 0.00
 16 18 0 10.03 0.00
 16 18 1 1.16 0.00
 16 18 2 5.77 0.00
 16 18 3 -0.65 0.00
 16 18 4 1.68 0.00
 16 18 5 6.56 0.00
 16 18 6 5.00 0.00
 16 18 7 0.91 0.00
 16 18 8 7.20 0.00
 16 18 9 2.15 0.00
 16 18 10 -4.55 0.00
 16 18 11 0.72 0.00
 16 18 12 2.43 0.00
 16 18 13 1.13 0.00
 16 18 14 -1.30 0.00
 16 18 15 10.71 0.00
 16 20 0 7.01 0.00
 16 20 1 -6.39 0.00
 16 20 2 -0.50 0.00
 16 20 3 4.41 0.00
 16 20 4 0.05 0.00
 16 20 5 0.20 0.00
 16 20 6 16.89 0.00
 16 20 7 -11.00 0.00
 16 20 8 9.93 0.00
 16 20 9 -4.46 0.00
 16 20 10 -4.03 0.00
 16 20 11 -1.07 0.00
 16 20 12 -6.26 0.00
 16 20 13 -0.37 0.00
 16 20 14 -8.02 0.00
 16 20 15 -9.33 0.00
 16 22 0 -1.30 0.00
 16 22 1 0.72 0.00
 16 22 2 11.47 0.00
 16 22 3 2.16 0.00
 16 22 4 9.25 0.00
 16 22 5 0.78 0.00
 16 22 6 13.77 0.00
 16 22 7 6.68 0.00
 16 22 8 5.02 0.00
 16 22 9 -5.01 0.00
 16 22 10 -6.10 0.00
 16 22 11 -0.95 0.00
 16 22 12 2.37 0.00
 16 22 13 0.00 0.00
 16 22 14 21.12 0.00
 16 24 0 10.70 0.00
 16 24 1 -19.12 0.00
 16 24 2 -12.83 0.00
 16 24 3 -6.37 0.00
 16 24 4 -1.60 0.00
 16 24 5 1.54 0.00
 16 24 6 2.54 0.00
 16 24 7 -9.77 0.00
 16 24 8 17.79 0.00
 16 24 9 7.93 0.00
 16 24 10 -1.41 0.00
 16 24 11 -3.46 0.00
 16 24 12 -15.27 0.00
 16 24 13 1.99 0.00
 16 26 0 -4.93 0.00
 16 26 1 -3.53 0.00
 16 26 2 9.15 0.00
 16 26 3 -0.37 0.00
 16 26 4 0.86 0.00
 16 26 5 8.63 0.00
 16 26 6 3.01 0.00
 16 26 7 -2.86 0.00
 16 26 8 -4.03 0.00
 16 26 9 -1.43 0.00
 16 26 10 1.81 0.00
 16 26 11 7.23 0.00
 16 26 12 -5.88 0.00
 16 26 13 -2.80 0.00
 16 28 0 8.31 0.00
 16 28 1 3.92 0.00
 16 28 2 -9.82 0.00
 16 28 3 1.99 0.00
 16 28 4 1.49 0.00
 16 28 5 -4.20 0.00
 16 28 6 1.34 0.00
 16 28 7 7.82 0.00
 16 28 8 -10.38 0.00
 16 28 9 -5.56 0.00
 16 28 10 -4.62 0.00
 16 28 11 1.12 0.00
 16 28 12 9.45 0.00
 16 30 0 7.20 0.00
 16 30 1 -1.39 0.00
 16 30 2 -5.60 0.00
 16 30 3 -12.91 0.00
 16 30 4 4.87 0.00
 16 30 5 6.92 0.00
 16 30 6 -5.49 0.00
 16 30 7 1.91 0.00
 16 30 8 0.50 0.00
 16 30 9 -0.74 0.00
 16 30 10 -2.25 0.00
 16 30 11 1.49 0.00
 16 32 0 -5.08 0.00
 16 32 1 -2.81 0.00
 16 32 2 6.05 0.00
 16 32 3 12.86 0.00
 16 32 4 9.01 0.00
 16 32 5 1.21 0.00
 16 32 6 -13.27 0.00
 16 32 7 -6.68 0.00
 16 32 8 -0.64 0.00
 16 32 9 -8.09 0.00
 16 32 10 -0.19 0.00
 16 34 0 5.76 0.00
 16 34 1 0.17 0.00
 16 34 2 -2.81 0.00
 16 34 3 2.35 0.00
 16 34 4 2.96 0.00
 16 34 5 -5.54 0.00
 16 34 6 -1.12 0.00
 16 34 7 6.09 0.00
 16 34 8 5.53 0.00
 16 34 9 3.73 0.00
 16 36 0 1.52 0.00
 16 36 1 8.02 0.00
 16 36 2 1.92 0.00
 16 36 3 -8.56 0.00
 16 36 4 6.89 0.00
 16 36 5 5.43 0.00
 16 36 6 -0.09 0.00
 16 36 7 7.54 0.00
 16 36 8 6.81 0.00
 16 38 0 -4.27 0.00
 16 38 1 -0.81 0.00
 16 38 2 -6.63 0.00
 16 38 3 5.90 0.00
 16 38 4 -5.20 0.00
 16 38 5 -5.62 0.00
 16 38 6 0.72 0.00
 16 38 7 10.20 0.00
 16 40 0 -6.77 0.00
 16 40 1 -8.17 0.00
 16 40 2 3.46 0.00
 16 40 3 10.92 0.00
 16 40 4 -1.40 0.00
 16 40 5 -12.48 0.00
 17 1 0 -24.01 0.00
 17 1 1 0.52 0.00
 17 1 2 6.15 0.00
 17 1 3 -2.94 0.00
 17 1 4 -9.03 0.00
 17 1 5 -5.29 0.00
 17 1 6 9.26 0.00
 17 1 7 -12.89 0.00
 17 1 8 -13.94 0.00
 17 1 9 -25.82 0.00
 17 1 10 10.97 0.00
 17 1 11 2.82 0.00
 17 1 12 2.16 0.00
 17 1 13 14.02 0.00
 17 1 14 2.26 0.00
 17 1 15 19.61 0.00
 17 1 16 -14.12 0.00
 17 3 0 -1.57 0.00
 17 3 1 -1.75 0.00
 17 3 2 -8.10 0.00
 17 3 3 -8.40 0.00
 17 3 4 2.55 0.00
 17 3 5 10.25 0.00
 17 3 6 -6.13 0.00
 17 3 7 10.14 0.00
 17 3 8 2.69 0.00
 17 3 9 12.05 0.00
 17 3 10 -2.41 0.00
 17 3 11 1.40 0.00
 17 3 12 -3.21 0.00
 17 3 13 -0.22 0.00
 17 3 14 9.33 0.00
 17 3 15 -13.68 0.00
 17 3 16 -15.43 0.00
 17 5 0 -3.65 0.00
 17 5 1 8.01 0.00
 17 5 2 -9.81 0.00
 17 5 3 0.98 0.00
 17 5 4 5.27 0.00
 17 5 5 -8.60 0.00
 17 5 6 -9.00 0.00
 17 5 7 -5.96 0.00
 17 5 8 9.30 0.00
 17 5 9 -12.83 0.00
 17 5 10 5.41 0.00
 17 5 11 1.23 0.00
 17 5 12 1.34 0.00
 17 5 13 0.57 0.00
 17 5 14 5.75 0.00
 17 5 15 6.33 0.00
 17 5 16 -10.86 0.00
 17 7 0 5.27 0.00
 17 7 1 -2.62 0.00
 17 7 2 3.56 0.00
 17 7 3 2.56 0.00
 17 7 4 6.22 0.00
 17 7 5 5.21 0.00
 17 7 6 -6.53 0.00
 17 7 7 -1.62 0.00
 17 7 8 -0.53 0.00
 17 7 9 5.99 0.00
 17 7 10 -7.17 0.00
 17 7 11 4.34 0.00
 17 7 12 -7.80 0.00
 17 7 13 -8.04 0.00
 17 7 14 0.77 0.00
 17 7 15 4.68 0.00
 17 7 16 11.54 0.00
 17 9 0 0.49 0.00
 17 9 1 -16.02 0.00
 17 9 2 -10.54 0.00
 17 9 3 8.51 0.00
 17 9 4 -4.13 0.00
 17 9 5 -2.02 0.00
 17 9 6 -2.20 0.00
 17 9 7 7.82 0.00
 17 9 8 16.99 0.00
 17 9 9 6.56 0.00
 17 9 10 6.92 0.00
 17 9 11 -9.36 0.00
 17 9 12 -2.56 0.00
 17 9 13 -0.03 0.00
 17 9 14 -8.00 0.00
 17 9 15 -10.23 0.00
 17 9 16 -0.02 0.00
 17 11 0 -0.26 0.00
 17 11 1 -1.51 0.00
 17 11 2 9.59 0.00
 17 11 3 7.04 0.00
 17 11 4 5.55 0.00
 17 11 5 2.50 0.00
 17 11 6 0.04 0.00
 17 11 7 6.01 0.00
 17 11 8 -4.93 0.00
 17 11 9 -7.77 0.00
 17 11 10 -8.63 0.00
 17 11 11 4.67 0.00
 17 11 12 -7.22 0.00
 17 11 13 13.30 0.00
 17 11 14 6.68 0.00
 17 11 15 -0.13 0.00
 17 13 0 8.65 0.00
 17 13 1 -3.64 0.00
 17 13 2 6.88 0.00
 17 13 3 1.76 0.00
 17 13 4 -13.49 0.00
 17 13 5 1.55 0.00
 17 13 6 2.60 0.00
 17 13 7 -4.72 0.00
 17 13 8 1.33 0.00
 17 13 9 7.59 0.00
 17 13 10 4.24 0.00
 17 13 11 7.78 0.00
 17 13 12 -20.94 0.00
 17 13 13 -22.31 0.00
 17 13 14 4.31 0.00
 17 13 15 1.13 0.00
 17 15 0 1.14 0.00
 17 15 1 3.01 0.00
 17 15 2 10.54 0.00
 17 15 3 -14.17 0.00
 17 15 4 0.94 0.00
 17 15 5 13.27 0.00
 17 15 6 -2.96 0.00
 17 15 7 -4.20 0.00
 17 15 8 -5.90 0.00
 17 15 9 10.39 0.00
 17 15 10 6.24 0.00
 17 15 11 -3.05 0.00
 17 15 12 5.09 0.00
 17 15 13 19.48 0.00
 17 15 14 2.09 0.00
 17 15 15 7.42 0.00
 17 17 0 7.55 0.00
 17 17 1 -8.75 0.00
 17 17 2 7.57 0.00
 17 17 3 -10.74 0.00
 17 17 4 2.16 0.00
 17 17 5 -10.81 0.00
 17 17 6 6.46 0.00
 17 17 7 4.48 0.00
 17 17 8 4.02 0.00
 17 17 9 -8.01 0.00
 17 17 10 -6.78 0.00
 17 17 11 -10.65 0.00
 17 17 12 0.53 0.00
 17 17 13 1.40 0.00
 17 17 14 7.94 0.00
 17 17 15 0.73 0.00
 17 19 0 3.92 0.00
 17 19 1 11.77 0.00
 17 19 2 -7.44 0.00
 17 19 3 -11.01 0.00
 17 19 4 4.96 0.00
 17 19 5 -0.09 0.00
 17 19 6 -6.00 0.00
 17 19 7 4.47 0.00
 17 19 8 -9.30 0.00
 17 19 9 3.11 0.00
 17 19 10 -4.56 0.00
 17 19 11 6.54 0.00
 17 19 12 4.38 0.00
 17 19 13 -1.97 0.00
 17 19 14 -2.98 0.00
 17 21 0 -7.92 0.00
 17 21 1 -15.99 0.00
 17 21 2 9.18 0.00
 17 21 3 -3.17 0.00
 17 21 4 1.86 0.00
 17 21 5 -15.27 0.00
 17 21 6 3.22 0.00
 17 21 7 3.72 0.00
 17 21 8 9.49 0.00
 17 21 9 8.41 0.00
 17 21 10 4.60 0.00
 17 21 11 -32.99 0.00
 17 21 12 6.23 0.00
 17 21 13 6.63 0.00
 17 21 14 -1.05 0.00
 17 23 0 5.98 0.00
 17 23 1 -3.86 0.00
 17 23 2 -8.69 0.00
 17 23 3 6.10 0.00
 17 23 4 0.01 0.00
 17 23 5 -2.80 0.00
 17 23 6 0.21 0.00
 17 23 7 -4.72 0.00
 17 23 8 -17.13 0.00
 17 23 9 -0.52 0.00
 17 23 10 11.24 0.00
 17 23 11 2.65 0.00
 17 23 12 -4.10 0.00
 17 23 13 3.77 0.00
 17 25 0 -5.82 0.00
 17 25 1 -19.51 0.00
 17 25 2 -1.56 0.00
 17 25 3 -9.14 0.00
 17 25 4 3.88 0.00
 17 25 5 3.47 0.00
 17 25 6 -8.27 0.00
 17 25 7 5.27 0.00
 17 25 8 17.84 0.00
 17 25 9 -8.26 0.00
 17 25 10 1.47 0.00
 17 25 11 4.45 0.00
 17 25 12 2.62 0.00
 17 27 0 -2.26 0.00
 17 27 1 3.85 0.00
 17 27 2 8.42 0.00
 17 27 3 -0.03 0.00
 17 27 4 -5.24 0.00
 17 27 5 2.74 0.00
 17 27 6 0.23 0.00
 17 27 7 4.51 0.00
 17 27 8 11.26 0.00
 17 27 9 -2.59 0.00
 17 27 10 -3.53 0.00
 17 27 11 -0.80 0.00
 17 27 12 2.07 0.00
 17 29 0 3.37 0.00
 17 29 1 -3.40 0.00
 17 29 2 -3.56 0.00
 17 29 3 4.23 0.00
 17 29 4 -0.94 0.00
 17 29 5 -2.56 0.00
 17 29 6 -9.18 0.00
 17 29 7 5.57 0.00
 17 29 8 1.21 0.00
 17 29 9 -1.44 0.00
 17 29 10 -9.05 0.00
 17 31 0 -3.02 0.00
 17 31 1 -0.76 0.00
 17 31 2 5.76 0.00
 17 31 3 -2.70 0.00
 17 31 4 -1.73 0.00
 17 31 5 -1.59 0.00
 17 31 6 13.23 0.00
 17 31 7 -8.91 0.00
 17 31 8 0.60 0.00
 17 31 9 1.28 0.00
 17 33 0 -4.37 0.00
 17 33 1 -5.53 0.00
 17 33 2 3.74 0.00
 17 33 3 8.22 0.00
 17 33 4 5.18 0.00
 17 33 5 -0.51 0.00
 17 33 6 2.24 0.00
 17 33 7 5.73 0.00
 17 33 8 -1.74 0.00
 17 33 9 9.77 0.00
 17 35 0 1.39 0.00
 17 35 1 4.80 0.00
 17 35 2 -2.66 0.00
 17 35 3 -13.14 0.00
 17 35 4 3.83 0.00
 17 35 5 -2.41 0.00
 17 35 6 -1.19 0.00
 17 35 7 2.96 0.00
 17 35 8 -1.03 0.00
 17 37 0 -3.21 0.00
 17 37 1 1.26 0.00
 17 37 2 -0.35 0.00
 17 37 3 -10.78 0.00
 17 37 4 -1.98 0.00
 17 37 5 3.97 0.00
 17 37 6 11.15 0.00
 17 39 0 -9.28 0.00
 17 39 1 0.91 0.00
 17 39 2 5.76 0.00
 17 39 3 -1.59 0.00
 17 39 4 0.79 0.00
 17 39 5 7.90 0.00
 18 0 0 20.56 0.00
 18 0 2 -0.91 0.00
 18 0 4 -0.50 0.00
 18 0 6 -11.23 0.00
 18 0 8 -9.58 0.00
 18 0 12 1.93 0.00
 18 0 14 -13.10 0.00
 18 2 0 3.79 0.00
 18 2 1 4.66 0.00
 18 2 2 -0.66 0.00
 18 2 3 -2.22 0.00
 18 2 4 -5.58 0.00
 18 2 5 1.14 0.00
 18 2 6 5.48 0.00
 18 2 7 -0.96 0.00
 18 2 8 10.17 0.00
 18 2 9 4.45 0.00
 18 2 10 18.65 0.00
 18 2 11 -20.41 0.00
 18 2 12 8.00 0.00
 18 2 13 4.43 0.00
 18 2 14 -6.95 0.00
 18 2 15 19.47 0.00
 18 4 0 12.77 0.00
 18 4 1 -0.91 0.00
 18 4 2 -2.15 0.00
 18 4 3 -3.52 0.00
 18 4 4 5.74 0.00
 18 4 5 -5.28 0.00
 18 4 6 -11.52 0.00
 18 4 7 3.08 0.00
 18 4 8 -12.00 0.00
 18 4 9 1.34 0.00
 18 4 10 -19.92 0.00
 18 4 11 4.86 0.00
 18 4 12 -11.81 0.00
 18 4 13 2.82 0.00
 18 4 14 -0.47 0.00
 18 4 15 14.28 0.00
 18 6 0 5.11 0.00
 18 6 1 6.30 0.00
 18 6 2 3.82 0.00
 18 6 3 1.26 0.00
 18 6 4 5.85 0.00
 18 6 5 -1.25 0.00
 18 6 6 1.84 0.00
 18 6 7 11.26 0.00
 18 6 8 8.25 0.00
 18 6 9 0.12 0.00
 18 6 10 7.90 0.00
 18 6 11 -9.94 0.00
 18 6 12 17.48 0.00
 18 6 13 -1.36 0.00
 18 6 14 -12.34 0.00
 18 6 15 5.75 0.00
 18 8 0 1.30 0.00
 18 8 1 -14.00 0.00
 18 8 2 -5.98 0.00
 18 8 3 0.38 0.00
 18 8 4 -6.15 0.00
 18 8 5 6.20 0.00
 18 8 6 -12.11 0.00
 18 8 7 -10.13 0.00
 18 8 8 -3.23 0.00
 18 8 9 17.04 0.00
 18 8 10 -7.34 0.00
 18 8 11 -6.81 0.00
 18 8 12 -2.13 0.00
 18 8 13 5.45 0.00
 18 8 14 -2.61 0.00
 18 8 15 0.20 0.00
 18 10 0 -10.28 0.00
 18 10 1 9.75 0.00
 18 10 2 -7.73 0.00
 18 10 3 -0.88 0.00
 18 10 4 0.94 0.00
 18 10 5 4.38 0.00
 18 10 6 9.14 0.00
 18 10 7 -0.12 0.00
 18 10 8 -0.42 0.00
 18 10 9 -3.41 0.00
 18 10 10 -11.93 0.00
 18 10 11 -11.23 0.00
 18 10 12 5.07 0.00
 18 10 13 1.13 0.00
 18 10 14 2.60 0.00
 18 10 15 0.56 0.00
 18 12 0 -0.93 0.00
 18 12 1 -5.50 0.00
 18 12 2 -7.68 0.00
 18 12 3 0.03 0.00
 18 12 4 5.61 0.00
 18 12 5 -5.35 0.00
 18 12 6 0.23 0.00
 18 12 7 -10.77 0.00
 18 12 8 -19.66 0.00
 18 12 9 1.81 0.00
 18 12 10 4.62 0.00
 18 12 11 4.75 0.00
 18 12 12 -19.77 0.00
 18 12 13 -10.12 0.00
 18 12 14 1.48 0.00
 18 12 15 -7.08 0.00
 18 14 0 4.22 0.00
 18 14 1 -5.57 0.00
 18 14 2 -6.63 0.00
 18 14 3 -7.94 0.00
 18 14 4 2.59 0.00
 18 14 5 0.86 0.00
 18 14 6 0.71 0.00
 18 14 7 -4.04 0.00
 18 14 8 -4.69 0.00
 18 14 9 -1.75 0.00
 18 14 10 -5.86 0.00
 18 14 11 7.41 0.00
 18 14 12 -19.05 0.00
 18 14 13 -12.76 0.00
 18 14 14 9.19 0.00
 18 14 15 13.39 0.00
 18 16 0 -4.81 0.00
 18 16 1 -8.32 0.00
 18 16 2 4.06 0.00
 18 16 3 -8.82 0.00
 18 16 4 4.04 0.00
 18 16 5 -2.32 0.00
 18 16 6 -3.29 0.00
 18 16 7 -1.31 0.00
 18 16 8 6.11 0.00
 18 16 9 4.47 0.00
 18 16 10 -9.55 0.00
 18 16 11 6.77 0.00
 18 16 12 1.10 0.00
 18 16 13 -2.19 0.00
 18 16 14 -10.88 0.00
 18 18 0 3.52 0.00
 18 18 1 -16.33 0.00
 18 18 2 13.73 0.00
 18 18 3 7.09 0.00
 18 18 4 -3.96 0.00
 18 18 5 0.31 0.00
 18 18 6 9.37 0.00
 18 18 7 -0.67 0.00
 18 18 8 -0.65 0.00
 18 18 9 5.24 0.00
 18 18 10 -7.34 0.00
 18 18 11 -6.33 0.00
 18 18 12 10.91 0.00
 18 18 13 0.79 0.00
 18 18 14 5.09 0.00
 18 20 0 -5.06 0.00
 18 20 1 -1.90 0.00
 18 20 2 -3.78 0.00
 18 20 3 -5.32 0.00
 18 20 4 11.95 0.00
 18 20 5 -0.91 0.00
 18 20 6 11.40 0.00
 18 20 7 4.01 0.00
 18 20 8 5.84 0.00
 18 20 9 1.41 0.00
 18 20 10 3.43 0.00
 18 20 11 1.37 0.00
 18 20 12 -5.95 0.00
 18 20 13 -3.88 0.00
 18 20 14 3.83 0.00
 18 22 0 -7.40 0.00
 18 22 1 2.04 0.00
 18 22 2 15.26 0.00
 18 22 3 -8.75 0.00
 18 22 4 -5.84 0.00
 18 22 5 -0.10 0.00
 18 22 6 13.98 0.00
 18 22 7 7.50 0.00
 18 22 8 8.05 0.00
 18 22 9 -8.56 0.00
 18 22 10 -9.84 0.00
 18 22 11 2.86 0.00
 18 22 12 3.30 0.00
 18 22 13 -2.24 0.00
 18 24 0 2.38 0.00
 18 24 1 -2.58 0.00
 18 24 2 -1.51 0.00
 18 24 3 -3.41 0.00
 18 24 4 -1.38 0.00
 18 24 5 -3.54 0.00
 18 24 6 -2.96 0.00
 18 24 7 3.24 0.00
 18 24 8 6.40 0.00
 18 24 9 -3.15 0.00
 18 24 10 10.87 0.00
 18 24 11 2.47 0.00
 18 24 12 0.00 0.00
 18 26 0 -3.36 0.00
 18 26 1 -6.78 0.00
 18 26 2 -1.60 0.00
 18 26 3 0.26 0.00
 18 26 4 4.78 0.00
 18 26 5 3.29 0.00
 18 26 6 -1.46 0.00
 18 26 7 1.11 0.00
 18 26 8 1.39 0.00
 18 26 9 2.39 0.00
 18 26 10 -0.15 0.00
 18 26 11 5.14 0.00
 18 28 0 3.62 0.00
 18 28 1 3.35 0.00
 18 28 2 -1.64 0.00
 18 28 3 -3.13 0.00
 18 28 4 -2.76 0.00
 18 28 5 -1.41 0.00
 18 28 6 -11.31 0.00
 18 28 7 -9.80 0.00
 18 28 8 8.49 0.00
 18 28 9 1.62 0.00
 18 28 10 -21.43 0.00
 18 30 0 1.01 0.00
 18 30 1 0.14 0.00
 18 30 2 2.01 0.00
 18 30 3 5.09 0.00
 18 30 4 10.28 0.00
 18 30 5 3.79 0.00
 18 30 6 -3.92 0.00
 18 30 7 9.20 0.00
 18 30 8 -2.34 0.00
 18 30 9 3.41 0.00
 18 32 0 2.09 0.00
 18 32 1 0.36 0.00
 18 32 2 0.47 0.00
 18 32 3 -7.83 0.00
 18 32 4 0.15 0.00
 18 32 5 4.48 0.00
 18 32 6 -1.74 0.00
 18 32 7 -6.00 0.00
 18 32 8 0.44 0.00
 18 34 0 2.86 0.00
 18 34 1 3.81 0.00
 18 34 2 3.45 0.00
 18 34 3 7.26 0.00
 18 34 4 2.29 0.00
 18 34 5 4.46 0.00
 18 34 6 -6.73 0.00
 18 34 7 3.58 0.00
 18 36 0 6.66 0.00
 18 36 1 -0.74 0.00
 18 36 2 -4.46 0.00
 18 36 3 -0.60 0.00
 18 36 4 1.75 0.00
 18 36 5 -5.55 0.00
 18 36 6 9.57 0.00
 18 38 0 -5.42 0.00
 18 38 1 -0.09 0.00
 18 38 2 -10.33 0.00
 18 38 3 2.51 0.00
 18 38 4 4.43 0.00
 19 1 0 4.58 0.00
 19 1 1 -11.50 0.00
 19 1 2 -14.40 0.00
 19 1 3 0.69 0.00
 19 1 4 -0.49 0.00
 19 1 5 -6.44 0.00
 19 1 6 -6.79 0.00
 19 1 7 4.04 0.00
 19 1 8 9.15 0.00
 19 1 9 6.51 0.00
 19 1 10 -9.26 0.00
 19 1 11 13.59 0.00
 19 1 12 -2.19 0.00
 19 1 13 4.36 0.00
 19 1 14 5.63 0.00
 19 1 15 -0.53 0.00
 19 3 0 -26.44 0.00
 19 3 1 0.05 0.00
 19 3 2 4.99 0.00
 19 3 3 9.36 0.00
 19 3 4 -3.60 0.00
 19 3 5 0.46 0.00
 19 3 6 2.12 0.00
 19 3 7 -10.16 0.00
 19 3 8 -10.08 0.00
 19 3 9 -16.69 0.00
 19 3 10 8.37 0.00
 19 3 11 -3.69 0.00
 19 3 12 1.98 0.00
 19 3 13 -6.23 0.00
 19 3 14 25.31 0.00
 19 3 15 10.90 0.00
 19 5 0 4.81 0.00
 19 5 1 9.95 0.00
 19 5 2 -8.57 0.00
 19 5 3 -12.30 0.00
 19 5 4 -6.40 0.00
 19 5 5 2.81 0.00
 19 5 6 0.81 0.00
 19 5 7 -1.98 0.00
 19 5 8 -1.10 0.00
 19 5 9 10.96 0.00
 19 5 10 -6.11 0.00
 19 5 11 0.16 0.00
 19 5 12 3.70 0.00
 19 5 13 11.02 0.00
 19 5 14 -21.44 0.00
 19 5 15 -12.17 0.00
 19 7 0 0.51 0.00
 19 7 1 -7.46 0.00
 19 7 2 -8.98 0.00
 19 7 3 11.61 0.00
 19 7 4 -0.97 0.00
 19 7 5 -5.16 0.00
 19 7 6 -1.07 0.00
 19 7 7 -5.95 0.00
 19 7 8 12.97 0.00
 19 7 9 -5.50 0.00
 19 7 10 1.97 0.00
 19 7 11 -9.12 0.00
 19 7 12 1.85 0.00
 19 7 13 -6.85 0.00
 19 7 14 8.95 0.00
 19 7 15 4.90 0.00
 19 9 0 -16.11 0.00
 19 9 1 -0.54 0.00
 19 9 2 10.85 0.00
 19 9 3 12.28 0.00
 19 9 4 6.38 0.00
 19 9 5 -0.72 0.00
 19 9 6 -3.89 0.00
 19 9 7 11.63 0.00
 19 9 8 11.13 0.00
 19 9 9 3.78 0.00
 19 9 10 -6.85 0.00
 19 9 11 6.12 0.00
 19 9 12 -11.50 0.00
 19 9 13 -5.53 0.00
 19 9 14 -9.07 0.00
 19 9 15 -3.73 0.00
 19 11 0 3.28 0.00
 19 11 1 5.98 0.00
 19 11 2 -5.56 0.00
 19 11 3 -9.77 0.00
 19 11 4 -1.24 0.00
 19 11 5 10.46 0.00
 19 11 6 8.34 0.00
 19 11 7 -8.91 0.00
 19 11 8 1.16 0.00
 19 11 9 11.11 0.00
 19 11 10 7.15 0.00
 19 11 11 -3.33 0.00
 19 11 12 -21.07 0.00
 19 11 13 8.53 0.00
 19 11 14 1.76 0.00
 19 11 15 -11.30 0.00
 19 13 0 -1.57 0.00
 19 13 1 -4.75 0.00
 19 13 2 12.12 0.00
 19 13 3 -3.45 0.00
 19 13 4 3.30 0.00
 19 13 5 14.73 0.00
 19 13 6 -0.45 0.00
 19 13 7 0.15 0.00
 19 13 8 -9.34 0.00
 19 13 9 13.49 0.00
 19 13 10 12.40 0.00
 19 13 11 7.10 0.00
 19 13 12 -22.73 0.00
 19 13 13 5.06 0.00
 19 13 14 16.34 0.00
 19 15 0 10.32 0.00
 19 15 1 -5.73 0.00
 19 15 2 1.47 0.00
 19 15 3 -3.79 0.00
 19 15 4 -1.18 0.00
 19 15 5 -10.75 0.00
 19 15 6 0.71 0.00
 19 15 7 8.76 0.00
 19 15 8 2.26 0.00
 19 15 9 -10.24 0.00
 19 15 10 -15.25 0.00
 19 15 11 14.47 0.00
 19 15 12 5.20 0.00
 19 15 13 -2.39 0.00
 19 15 14 0.07 0.00
 19 17 0 0.41 0.00
 19 17 1 8.12 0.00
 19 17 2 5.62 0.00
 19 17 3 -13.31 0.00
 19 17 4 7.32 0.00
 19 17 5 6.68 0.00
 19 17 6 1.73 0.00
 19 17 7 2.98 0.00
 19 17 8 0.88 0.00
 19 17 9 18.84 0.00
 19 17 10 4.14 0.00
 19 17 11 0.47 0.00
 19 17 12 -4.59 0.00
 19 17 13 0.87 0.00
 19 17 14 9.39 0.00
 19 19 0 -12.73 0.00
 19 19 1 -12.71 0.00
 19 19 2 0.87 0.00
 19 19 3 -12.51 0.00
 19 19 4 -3.67 0.00
 19 19 5 -16.07 0.00
 19 19 6 1.49 0.00
 19 19 7 18.19 0.00
 19 19 8 -6.40 0.00
 19 19 9 9.61 0.00
 19 19 10 -6.77 0.00
 19 19 11 -8.27 0.00
 19 19 12 2.61 0.00
 19 19 13 -0.07 0.00
 19 21 0 -11.63 0.00
 19 21 1 5.73 0.00
 19 21 2 -0.63 0.00
 19 21 3 4.89 0.00
 19 21 4 3.08 0.00
 19 21 5 -5.67 0.00
 19 21 6 -8.20 0.00
 19 21 7 -2.49 0.00
 19 21 8 7.20 0.00
 19 21 9 9.37 0.00
 19 21 10 1.00 0.00
 19 21 11 3.94 0.00
 19 21 12 10.13 0.00
 19 21 13 -7.76 0.00
 19 23 0 -4.78 0.00
 19 23 1 -13.20 0.00
 19 23 2 -1.76 0.00
 19 23 3 -10.46 0.00
 19 23 4 -1.97 0.00
 19 23 5 -3.27 0.00
 19 23 6 2.39 0.00
 19 23 7 0.42 0.00
 19 23 8 -4.56 0.00
 19 23 9 0.45 0.00
 19 23 10 -6.30 0.00
 19 23 11 -0.88 0.00
 19 23 12 7.78 0.00
 19 25 0 -3.60 0.00
 19 25 1 -3.23 0.00
 19 25 2 -6.35 0.00
 19 25 3 5.48 0.00
 19 25 4 -3.36 0.00
 19 25 5 -0.06 0.00
 19 25 6 -0.51 0.00
 19 25 7 12.23 0.00
 19 25 8 2.07 0.00
 19 25 9 -1.58 0.00
 19 25 10 7.83 0.00
 19 25 11 -3.77 0.00
 19 27 0 8.96 0.00
 19 27 1 3.30 0.00
 19 27 2 -0.52 0.00
 19 27 3 -5.49 0.00
 19 27 4 12.17 0.00
 19 27 5 -2.49 0.00
 19 27 6 -14.63 0.00
 19 27 7 8.57 0.00
 19 27 8 1.53 0.00
 19 27 9 -4.14 0.00
 19 29 0 -16.07 0.00
 19 29 1 3.10 0.00
 19 29 2 6.54 0.00
 19 29 3 -2.37 0.00
 19 29 4 -12.79 0.00
 19 29 5 7.34 0.00
 19 29 6 3.37 0.00
 19 29 7 5.64 0.00
 19 29 8 13.30 0.00
 19 29 9 -9.39 0.00
 19 31 0 -4.32 0.00
 19 31 1 -17.50 0.00
 19 31 2 5.18 0.00
 19 31 3 12.12 0.00
 19 31 4 8.34 0.00
 19 31 5 2.72 0.00
 19 31 6 -5.15 0.00
 19 31 7 0.35 0.00
 19 31 8 3.03 0.00
 19 33 0 6.16 0.00
 19 33 1 0.30 0.00
 19 33 2 -0.73 0.00
 19 33 3 -4.49 0.00
 19 33 4 3.06 0.00
 19 33 5 -2.59 0.00
 19 33 6 7.28 0.00
 19 33 7 -4.95 0.00
 19 35 0 -4.41 0.00
 19 35 1 -5.88 0.00
 19 35 2 3.91 0.00
 19 35 3 6.01 0.00
 19 35 4 -5.51 0.00
 19 35 5 -2.54 0.00
 19 35 6 6.35 0.00
 19 37 0 5.48 0.00
 19 37 1 1.51 0.00
 19 37 2 -6.66 0.00
 19 37 3 -3.38 0.00
 19 37 4 5.02 0.00
 20 0 0 8.93 0.00
 20 0 2 -6.21 0.00
 20 0 4 1.14 0.00
 20 0 6 -7.08 0.00
 20 0 8 6.28 0.00
 20 0 10 1.90 0.00
 20 0 12 -15.02 0.00
 20 0 14 -0.51 0.00
 20 2 0 4.93 0.00
 20 2 1 2.66 0.00
 20 2 2 12.27 0.00
 20 2 3 -11.60 0.00
 20 2 4 -1.17 0.00
 20 2 5 11.01 0.00
 20 2 6 -0.07 0.00
 20 2 7 -12.32 0.00
 20 2 8 -3.85 0.00
 20 2 9 1.31 0.00
 20 2 10 -24.05 0.00
 20 2 11 0.18 0.00
 20 2 12 -6.61 0.00
 20 2 13 -3.02 0.00
 20 2 14 -4.75 0.00
 20 2 15 24.35 0.00
 20 4 0 4.04 0.00
 20 4 1 9.16 0.00
 20 4 2 8.50 0.00
 20 4 3 -2.42 0.00
 20 4 4 -4.82 0.00
 20 4 5 -0.40 0.00
 20 4 6 0.16 0.00
 20 4 7 4.74 0.00
 20 4 8 -13.49 0.00
 20 4 9 2.20 0.00
 20 4 10 15.01 0.00
 20 4 11 -15.04 0.00
 20 4 12 6.98 0.00
 20 4 13 2.65 0.00
 20 4 14 -10.06 0.00
 20 4 15 -5.81 0.00
 20 6 0 12.45 0.00
 20 6 1 -1.09 0.00
 20 6 2 -16.54 0.00
 20 6 3 -5.95 0.00
 20 6 4 10.79 0.00
 20 6 5 2.23 0.00
 20 6 6 -8.93 0.00
 20 6 7 0.47 0.00
 20 6 8 -1.08 0.00
 20 6 9 7.33 0.00
 20 6 10 -11.80 0.00
 20 6 11 -1.32 0.00
 20 6 12 -5.51 0.00
 20 6 13 -0.58 0.00
 20 6 14 -19.85 0.00
 20 6 15 16.54 0.00
 20 8 0 -6.67 0.00
 20 8 1 6.92 0.00
 20 8 2 -8.56 0.00
 20 8 3 -3.14 0.00
 20 8 4 4.53 0.00
 20 8 5 3.95 0.00
 20 8 6 -7.89 0.00
 20 8 7 11.84 0.00
 20 8 8 15.72 0.00
 20 8 9 4.66 0.00
 20 8 10 0.51 0.00
 20 8 11 -4.09 0.00
 20 8 12 3.87 0.00
 20 8 13 -8.43 0.00
 20 8 14 6.93 0.00
 20 10 0 2.01 0.00
 20 10 1 -5.01 0.00
 20 10 2 -11.76 0.00
 20 10 3 4.46 0.00
 20 10 4 2.74 0.00
 20 10 5 -5.38 0.00
 20 10 6 -11.38 0.00
 20 10 7 -1.18 0.00
 20 10 8 -8.13 0.00
 20 10 9 6.69 0.00
 20 10 10 1.21 0.00
 20 10 11 -3.38 0.00
 20 10 12 -10.77 0.00
 20 10 13 -2.75 0.00
 20 10 14 -11.77 0.00
 20 12 0 -4.42 0.00
 20 12 1 3.80 0.00
 20 12 2 3.09 0.00
 20 12 3 -9.74 0.00
 20 12 4 -5.48 0.00
 20 12 5 10.29 0.00
 20 12 6 11.65 0.00
 20 12 7 -8.27 0.00
 20 12 8 -1.11 0.00
 20 12 9 -10.54 0.00
 20 12 10 0.85 0.00
 20 12 11 3.30 0.00
 20 12 12 -13.37 0.00
 20 12 13 3.86 0.00
 20 12 14 10.94 0.00
 20 14 0 -20.01 0.00
 20 14 1 8.05 0.00
 20 14 2 13.39 0.00
 20 14 3 2.98 0.00
 20 14 4 -0.20 0.00
 20 14 5 -7.59 0.00
 20 14 6 0.75 0.00
 20 14 7 -0.59 0.00
 20 14 8 -0.88 0.00
 20 14 9 -9.46 0.00
 20 14 10 -8.37 0.00
 20 14 11 27.58 0.00
 20 14 12 -33.69 0.00
 20 14 13 -6.40 0.00
 20 14 14 -6.50 0.00
 20 16 0 4.23 0.00
 20 16 1 -13.22 0.00
 20 16 2 7.00 0.00
 20 16 3 2.13 0.00
 20 16 4 2.80 0.00
 20 16 5 -2.23 0.00
 20 16 6 3.44 0.00
 20 16 7 -2.40 0.00
 20 16 8 3.71 0.00
 20 16 9 12.95 0.00
 20 16 10 -18.21 0.00
 20 16 11 19.29 0.00
 20 16 12 17.09 0.00
 20 16 13 -20.29 0.00
 20 18 0 -4.19 0.00
 20 18 1 -2.61 0.00
 20 18 2 1.35 0.00
 20 18 3 -6.14 0.00
 20 18 4 5.53 0.00
 20 18 5 3.76 0.00
 20 18 6 -1.04 0.00
 20 18 7 -3.64 0.00
 20 18 8 7.08 0.00
 20 18 9 1.29 0.00
 20 18 10 -2.57 0.00
 20 18 11 -6.94 0.00
 20 18 12 4.11 0.00
 20 18 13 15.92 0.00
 20 20 0 -6.52 0.00
 20 20 1 -6.04 0.00
 20 20 2 19.75 0.00
 20 20 3 -3.08 0.00
 20 20 4 4.54 0.00
 20 20 5 -3.57 0.00
 20 20 6 20.31 0.00
 20 20 7 1.00 0.00
 20 20 8 -22.03 0.00
 20 20 9 5.30 0.00
 20 20 10 0.61 0.00
 20 20 11 6.59 0.00
 20 20 12 2.65 0.00
 20 22 0 19.35 0.00
 20 22 1 3.83 0.00
 20 22 2 -14.88 0.00
 20 22 3 4.34 0.00
 20 22 4 3.38 0.00
 20 22 5 -7.59 0.00
 20 22 6 7.41 0.00
 20 22 7 16.81 0.00
 20 22 8 10.72 0.00
 20 22 9 -8.78 0.00
 20 22 10 -0.05 0.00
 20 22 11 -6.20 0.00
 20 24 0 -7.07 0.00
 20 24 1 1.94 0.00
 20 24 2 4.12 0.00
 20 24 3 -2.12 0.00
 20 24 4 -0.75 0.00
 20 24 5 0.54 0.00
 20 24 6 2.08 0.00
 20 24 7 -9.57 0.00
 20 24 8 4.83 0.00
 20 24 9 6.12 0.00
 20 24 10 -1.88 0.00
 20 26 0 -7.74 0.00
 20 26 1 -0.65 0.00
 20 26 2 4.97 0.00
 20 26 3 1.71 0.00
 20 26 4 6.27 0.00
 20 26 5 -1.71 0.00
 20 26 6 -14.26 0.00
 20 26 7 -9.20 0.00
 20 26 8 2.61 0.00
 20 26 9 -1.31 0.00
 20 28 0 -11.36 0.00
 20 28 1 -1.21 0.00
 20 28 2 5.54 0.00
 20 28 3 -3.08 0.00
 20 28 4 1.38 0.00
 20 28 5 -1.36 0.00
 20 28 6 0.07 0.00
 20 28 7 8.24 0.00
 20 28 8 -1.57 0.00
 20 28 9 14.83 0.00
 20 30 0 16.39 0.00
 20 30 1 0.50 0.00
 20 30 2 -4.36 0.00
 20 30 3 -6.67 0.00
 20 30 4 -4.29 0.00
 20 30 5 3.06 0.00
 20 30 6 -1.16 0.00
 20 30 7 -11.35 0.00
 20 30 8 2.96 0.00
 20 32 0 12.75 0.00
 20 32 1 8.96 0.00
 20 32 2 5.92 0.00
 20 32 3 1.11 0.00
 20 32 4 3.87 0.00
 20 32 5 5.54 0.00
 20 32 6 -6.64 0.00
 20 32 7 4.17 0.00
 20 34 0 -10.28 0.00
 20 34 1 -7.09 0.00
 20 34 2 3.51 0.00
 20 34 3 -2.30 0.00
 20 34 4 -4.85 0.00
 20 34 5 0.28 0.00
 20 34 6 2.67 0.00
 20 36 0 15.21 0.00
 20 36 1 9.08 0.00
 20 36 2 -5.22 0.00
 20 36 3 1.13 0.00
 20 36 4 7.71 0.00
 21 1 0 -14.93 0.00
 21 1 1 8.95 0.00
 21 1 2 2.64 0.00
 21 1 3 0.02 0.00
 21 1 4 -3.74 0.00
 21 1 5 6.28 0.00
 21 1 6 -0.06 0.00
 21 1 7 -7.57 0.00
 21 1 8 -1.54 0.00
 21 1 9 11.93 0.00
 21 1 10 -3.12 0.00
 21 1 11 -16.79 0.00
 21 1 12 -5.24 0.00
 21 1 13 3.33 0.00
 21 1 14 6.84 0.00
 21 3 0 8.81 0.00
 21 3 1 6.14 0.00
 21 3 2 -16.23 0.00
 21 3 3 -3.96 0.00
 21 3 4 -1.27 0.00
 21 3 5 2.52 0.00
 21 3 6 -3.57 0.00
 21 3 7 -8.48 0.00
 21 3 8 -4.48 0.00
 21 3 9 -6.87 0.00
 21 3 10 0.09 0.00
 21 3 11 6.45 0.00
 21 3 12 -3.66 0.00
 21 3 13 6.90 0.00
 21 3 14 -1.63 0.00
 21 5 0 1.55 0.00
 21 5 1 -4.19 0.00
 21 5 2 -12.14 0.00
 21 5 3 -3.61 0.00
 21 5 4 0.14 0.00
 21 5 5 -2.43 0.00
 21 5 6 -6.03 0.00
 21 5 7 0.94 0.00
 21 5 8 -6.13 0.00
 21 5 9 -6.28 0.00
 21 5 10 3.03 0.00
 21 5 11 2.02 0.00
 21 5 12 11.60 0.00
 21 5 13 -4.45 0.00
 21 5 14 17.53 0.00
 21 7 0 2.27 0.00
 21 7 1 7.29 0.00
 21 7 2 -7.10 0.00
 21 7 3 2.26 0.00
 21 7 4 9.71 0.00
 21 7 5 -3.44 0.00
 21 7 6 -4.46 0.00
 21 7 7 -12.68 0.00
 21 7 8 5.08 0.00
 21 7 9 3.60 0.00
 21 7 10 -1.85 0.00
 21 7 11 -5.74 0.00
 21 7 12 2.67 0.00
 21 7 13 -8.63 0.00
 21 7 14 -18.51 0.00
 21 9 0 -10.72 0.00
 21 9 1 3.34 0.00
 21 9 2 4.57 0.00
 21 9 3 -6.37 0.00
 21 9 4 -14.71 0.00
 21 9 5 24.70 0.00
 21 9 6 13.90 0.00
 21 9 7 -6.00 0.00
 21 9 8 6.34 0.00
 21 9 9 1.79 0.00
 21 9 10 -1.63 0.00
 21 9 11 -7.00 0.00
 21 9 12 -4.02 0.00
 21 9 13 11.67 0.00
 21 9 14 4.23 0.00
 21 11 0 -5.19 0.00
 21 11 1 -11.59 0.00
 21 11 2 14.42 0.00
 21 11 3 14.24 0.00
 21 11 4 -3.12 0.00
 21 11 5 -11.31 0.00
 21 11 6 6.49 0.00
 21 11 7 0.91 0.00
 21 11 8 3.05 0.00
 21 11 9 3.71 0.00
 21 11 10 5.56 0.00
 21 11 11 11.74 0.00
 21 11 12 -15.52 0.00
 21 11 13 -18.92 0.00
 21 11 14 5.23 0.00
 21 13 0 0.70 0.00
 21 13 1 5.57 0.00
 21 13 2 -1.16 0.00
 21 13 3 -6.37 0.00
 21 13 4 8.75 0.00
 21 13 5 6.94 0.00
 21 13 6 2.08 0.00
 21 13 7 -2.42 0.00
 21 13 8 -8.26 0.00
 21 13 9 5.84 0.00
 21 13 10 0.92 0.00
 21 13 11 22.94 0.00
 21 13 12 -19.11 0.00
 21 13 13 1.13 0.00
 21 15 0 6.11 0.00
 21 15 1 11.76 0.00
 21 15 2 8.80 0.00
 21 15 3 -8.69 0.00
 21 15 4 4.00 0.00
 21 15 5 4.07 0.00
 21 15 6 -8.42 0.00
 21 15 7 -7.53 0.00
 21 15 8 5.32 0.00
 21 15 9 16.53 0.00
 21 15 10 5.29 0.00
 21 15 11 -10.28 0.00
 21 15 12 0.89 0.00
 21 15 13 16.91 0.00
 21 17 0 -6.91 0.00
 21 17 1 -14.31 0.00
 21 17 2 17.72 0.00
 21 17 3 3.74 0.00
 21 17 4 0.77 0.00
 21 17 5 -7.96 0.00
 21 17 6 -7.89 0.00
 21 17 7 1.07 0.00
 21 17 8 2.49 0.00
 21 17 9 17.34 0.00
 21 17 10 -16.45 0.00
 21 17 11 11.45 0.00
 21 17 12 -6.88 0.00
 21 17 13 -13.44 0.00
 21 19 0 -10.80 0.00
 21 19 1 -11.06 0.00
 21 19 2 12.46 0.00
 21 19 3 7.72 0.00
 21 19 4 -10.15 0.00
 21 19 5 -0.24 0.00
 21 19 6 1.13 0.00
 21 19 7 6.09 0.00
 21 19 8 0.50 0.00
 21 19 9 9.11 0.00
 21 19 10 9.51 0.00
 21 19 11 6.38 0.00
 21 19 12 1.76 0.00
 21 21 0 -8.15 0.00
 21 21 1 7.56 0.00
 21 21 2 -13.27 0.00
 21 21 3 -4.23 0.00
 21 21 4 1.62 0.00
 21 21 5 -23.06 0.00
 21 21 6 1.19 0.00
 21 21 7 2.96 0.00
 21 21 8 0.08 0.00
 21 21 9 8.55 0.00
 21 21 10 5.59 0.00
 21 21 11 -1.30 0.00
 21 23 0 5.61 0.00
 21 23 1 8.00 0.00
 21 23 2 -0.88 0.00
 21 23 3 4.54 0.00
 21 23 4 0.20 0.00
 21 23 5 1.52 0.00
 21 23 6 -1.75 0.00
 21 23 7 -2.54 0.00
 21 23 8 4.34 0.00
 21 23 9 -6.66 0.00
 21 23 10 -21.08 0.00
 21 25 0 -0.65 0.00
 21 25 1 -3.09 0.00
 21 25 2 -5.48 0.00
 21 25 3 -7.65 0.00
 21 25 4 3.19 0.00
 21 25 5 0.91 0.00
 21 25 6 4.89 0.00
 21 25 7 0.50 0.00
 21 25 8 -0.87 0.00
 21 25 9 4.36 0.00
 21 27 0 -4.96 0.00
 21 27 1 -1.89 0.00
 21 27 2 7.22 0.00
 21 27 3 -2.02 0.00
 21 27 4 -4.11 0.00
 21 27 5 0.64 0.00
 21 27 6 -1.11 0.00
 21 27 7 5.93 0.00
 21 27 8 -6.27 0.00
 21 29 0 5.84 0.00
 21 29 1 0.86 0.00
 21 29 2 -7.22 0.00
 21 29 3 3.66 0.00
 21 29 4 4.48 0.00
 21 29 5 0.30 0.00
 21 29 6 -2.07 0.00
 21 29 7 1.12 0.00
 21 29 8 -3.91 0.00
 21 31 0 2.90 0.00
 21 31 1 -4.53 0.00
 21 31 2 -0.79 0.00
 21 31 3 -2.00 0.00
 21 31 4 3.32 0.00
 21 31 5 -1.40 0.00
 21 31 6 -3.04 0.00
 21 31 7 2.17 0.00
 21 33 0 1.45 0.00
 21 33 1 -14.48 0.00
 21 33 2 4.34 0.00
 21 33 3 -0.84 0.00
 21 33 4 4.38 0.00
 21 33 5 2.00 0.00
 21 35 0 -1.58 0.00
 21 35 1 8.32 0.00
 21 35 2 -3.33 0.00
 21 35 3 -0.11 0.00
 22 0 0 -0.08 0.00
 22 0 2 5.03 0.00
 22 0 4 -0.93 0.00
 22 0 6 -1.70 0.00
 22 0 8 -6.56 0.00
 22 0 10 -11.03 0.00
 22 0 12 -1.70 0.00
 22 0 14 9.19 0.00
 22 2 0 -5.54 0.00
 22 2 1 -11.12 0.00
 22 2 2 9.85 0.00
 22 2 3 1.11 0.00
 22 2 4 10.90 0.00
 22 2 5 -2.31 0.00
 22 2 6 8.15 0.00
 22 2 7 -1.39 0.00
 22 2 8 -8.48 0.00
 22 2 9 -9.83 0.00
 22 2 10 -1.87 0.00
 22 2 11 -4.24 0.00
 22 2 12 -10.70 0.00
 22 2 13 -6.43 0.00
 22 2 14 -12.12 0.00
 22 4 0 2.41 0.00
 22 4 1 -9.67 0.00
 22 4 2 15.07 0.00
 22 4 3 4.89 0.00
 22 4 4 -11.74 0.00
 22 4 5 -2.57 0.00
 22 4 6 -7.50 0.00
 22 4 7 6.47 0.00
 22 4 8 -13.09 0.00
 22 4 9 1.00 0.00
 22 4 10 3.00 0.00
 22 4 11 -2.96 0.00
 22 4 12 -4.66 0.00
 22 4 13 7.23 0.00
 22 4 14 -1.03 0.00
 22 6 0 -4.72 0.00
 22 6 1 7.93 0.00
 22 6 2 -0.37 0.00
 22 6 3 -16.65 0.00
 22 6 4 4.01 0.00
 22 6 5 1.46 0.00
 22 6 6 -2.09 0.00
 22 6 7 8.96 0.00
 22 6 8 -7.16 0.00
 22 6 9 0.84 0.00
 22 6 10 4.33 0.00
 22 6 11 0.65 0.00
 22 6 12 1.95 0.00
 22 6 13 -3.27 0.00
 22 8 0 -5.40 0.00
 22 8 1 2.19 0.00
 22 8 2 -6.72 0.00
 22 8 3 8.57 0.00
 22 8 4 -5.64 0.00
 22 8 5 -0.20 0.00
 22 8 6 -16.78 0.00
 22 8 7 5.41 0.00
 22 8 8 17.46 0.00
 22 8 9 3.18 0.00
 22 8 10 -3.47 0.00
 22 8 11 -4.15 0.00
 22 8 12 1.35 0.00
 22 8 13 -2.31 0.00
 22 10 0 -5.43 0.00
 22 10 1 7.29 0.00
 22 10 2 2.73 0.00
 22 10 3 -8.20 0.00
 22 10 4 3.31 0.00
 22 10 5 7.05 0.00
 22 10 6 -6.56 0.00
 22 10 7 -5.84 0.00
 22 10 8 9.41 0.00
 22 10 9 1.98 0.00
 22 10 10 3.40 0.00
 22 10 11 7.85 0.00
 22 10 12 -7.35 0.00
 22 10 13 -11.77 0.00
 22 12 0 2.18 0.00
 22 12 1 5.84 0.00
 22 12 2 4.30 0.00
 22 12 3 -0.56 0.00
 22 12 4 -9.49 0.00
 22 12 5 -8.50 0.00
 22 12 6 2.71 0.00
 22 12 7 6.33 0.00
 22 12 8 -2.20 0.00
 22 12 9 -7.74 0.00
 22 12 10 -6.21 0.00
 22 12 11 13.72 0.00
 22 12 12 -11.15 0.00
 22 12 13 -8.73 0.00
 22 14 0 5.10 0.00
 22 14 1 5.56 0.00
 22 14 2 14.02 0.00
 22 14 3 3.87 0.00
 22 14 4 5.23 0.00
 22 14 5 2.43 0.00
 22 14 6 0.01 0.00
 22 14 7 -0.92 0.00
 22 14 8 11.56 0.00
 22 14 9 8.05 0.00
 22 14 10 -13.41 0.00
 22 14 11 -8.94 0.00
 22 14 12 -1.84 0.00
 22 16 0 4.58 0.00
 22 16 1 -2.51 0.00
 22 16 2 2.55 0.00
 22 16 3 13.51 0.00
 22 16 4 -7.98 0.00
 22 16 5 -1.87 0.00
 22 16 6 -0.74 0.00
 22 16 7 4.04 0.00
 22 16 8 3.56 0.00
 22 16 9 -11.22 0.00
 22 16 10 10.29 0.00
 22 16 11 12.99 0.00
 22 16 12 -4.23 0.00
 22 18 0 5.67 0.00
 22 18 1 2.58 0.00
 22 18 2 15.56 0.00
 22 18 3 -3.04 0.00
 22 18 4 8.06 0.00
 22 18 5 -8.85 0.00
 22 18 6 2.70 0.00
 22 18 7 -5.69 0.00
 22 18 8 -5.66 0.00
 22 18 9 7.71 0.00
 22 18 10 -13.77 0.00
 22 18 11 13.95 0.00
 22 20 0 4.76 0.00
 22 20 1 -5.46 0.00
 22 20 2 -0.95 0.00
 22 20 3 -1.33 0.00
 22 20 4 15.97 0.00
 22 20 5 5.72 0.00
 22 20 6 -2.92 0.00
 22 20 7 -7.14 0.00
 22 20 8 3.89 0.00
 22 20 9 -4.73 0.00
 22 20 10 5.45 0.00
 22 22 0 3.86 0.00
 22 22 1 -5.27 0.00
 22 22 2 4.20 0.00
 22 22 3 15.43 0.00
 22 22 4 0.66 0.00
 22 22 5 2.66 0.00
 22 22 6 22.35 0.00
 22 22 7 -15.86 0.00
 22 22 8 -10.32 0.00
 22 24 0 0.89 0.00
 22 24 1 -1.66 0.00
 22 24 2 -6.66 0.00
 22 24 3 -0.96 0.00
 22 24 4 5.72 0.00
 22 24 5 -8.52 0.00
 22 24 6 -3.15 0.00
 22 24 7 9.60 0.00
 22 24 8 9.12 0.00
 22 26 0 -1.25 0.00
 22 26 1 6.22 0.00
 22 26 2 1.73 0.00
 22 26 3 -3.65 0.00
 22 26 4 1.77 0.00
 22 26 5 5.38 0.00
 22 26 6 1.14 0.00
 22 26 7 -11.00 0.00
 22 26 8 -1.95 0.00
 22 28 0 1.79 0.00
 22 28 1 -0.77 0.00
 22 28 2 -3.84 0.00
 22 28 3 -4.60 0.00
 22 28 4 -0.85 0.00
 22 28 5 -6.71 0.00
 22 28 6 4.40 0.00
 22 28 7 -20.27 0.00
 22 30 0 2.36 0.00
 22 30 1 -0.33 0.00
 22 30 2 8.70 0.00
 22 30 3 -2.48 0.00
 22 30 4 -5.41 0.00
 22 30 5 1.15 0.00
 22 30 6 1.68 0.00
 22 32 0 2.45 0.00
 22 32 1 -10.73 0.00
 22 32 2 10.65 0.00
 22 32 3 -1.62 0.00
 22 32 4 -7.31 0.00
 22 32 5 -0.32 0.00
 22 34 0 5.35 0.00
 22 34 1 23.05 0.00
 22 34 2 -9.76 0.00
 23 1 0 -18.00 0.00
 23 1 1 -18.78 0.00
 23 1 2 14.93 0.00
 23 1 3 5.39 0.00
 23 1 4 -11.04 0.00
 23 1 5 4.44 0.00
 23 1 6 14.11 0.00
 23 1 7 9.01 0.00
 23 1 8 -18.59 0.00
 23 1 9 -17.16 0.00
 23 1 10 14.59 0.00
 23 1 11 25.77 0.00
 23 1 12 -17.11 0.00
 23 1 13 -8.81 0.00
 23 3 0 1.17 0.00
 23 3 1 9.16 0.00
 23 3 2 -7.10 0.00
 23 3 3 3.17 0.00
 23 3 4 0.88 0.00
 23 3 5 -3.73 0.00
 23 3 6 -4.87 0.00
 23 3 7 -2.08 0.00
 23 3 8 -3.60 0.00
 23 3 9 -1.75 0.00
 23 3 10 -0.75 0.00
 23 3 11 -5.59 0.00
 23 3 12 13.64 0.00
 23 3 13 1.96 0.00
 23 5 0 11.55 0.00
 23 5 1 11.05 0.00
 23 5 2 -9.46 0.00
 23 5 3 -16.88 0.00
 23 5 4 0.20 0.00
 23 5 5 2.51 0.00
 23 5 6 -2.00 0.00
 23 5 7 -14.62 0.00
 23 5 8 -15.86 0.00
 23 5 9 7.40 0.00
 23 5 10 7.84 0.00
 23 5 11 -6.63 0.00
 23 5 12 10.27 0.00
 23 5 13 7.07 0.00
 23 7 0 2.52 0.00
 23 7 1 -4.32 0.00
 23 7 2 -11.45 0.00
 23 7 3 -11.60 0.00
 23 7 4 3.02 0.00
 23 7 5 11.11 0.00
 23 7 6 5.48 0.00
 23 7 7 -13.84 0.00
 23 7 8 3.50 0.00
 23 7 9 2.07 0.00
 23 7 10 -0.80 0.00
 23 7 11 -0.20 0.00
 23 7 12 7.09 0.00
 23 7 13 15.21 0.00
 23 9 0 5.91 0.00
 23 9 1 -5.18 0.00
 23 9 2 4.39 0.00
 23 9 3 8.55 0.00
 23 9 4 0.82 0.00
 23 9 5 -5.87 0.00
 23 9 6 -3.60 0.00
 23 9 7 1.49 0.00
 23 9 8 0.46 0.00
 23 9 9 -11.46 0.00
 23 9 10 -1.93 0.00
 23 9 11 -2.68 0.00
 23 9 12 7.20 0.00
 23 11 0 7.11 0.00
 23 11 1 -6.70 0.00
 23 11 2 3.65 0.00
 23 11 3 1.88 0.00
 23 11 4 -7.31 0.00
 23 11 5 0.61 0.00
 23 11 6 14.49 0.00
 23 11 7 1.75 0.00
 23 11 8 3.53 0.00
 23 11 9 -1.72 0.00
 23 11 10 -6.48 0.00
 23 11 11 16.13 0.00
 23 11 12 -5.78 0.00
 23 13 0 -1.59 0.00
 23 13 1 -3.80 0.00
 23 13 2 7.04 0.00
 23 13 3 0.80 0.00
 23 13 4 4.68 0.00
 23 13 5 -2.88 0.00
 23 13 6 -7.31 0.00
 23 13 7 -8.45 0.00
 23 13 8 11.11 0.00
 23 13 9 11.18 0.00
 23 13 10 -1.07 0.00
 23 13 11 -1.68 0.00
 23 13 12 -3.34 0.00
 23 15 0 4.25 0.00
 23 15 1 6.13 0.00
 23 15 2 15.23 0.00
 23 15 3 2.64 0.00
 23 15 4 -3.19 0.00
 23 15 5 -1.74 0.00
 23 15 6 -1.93 0.00
 23 15 7 -11.86 0.00
 23 15 8 -12.50 0.00
 23 15 9 12.94 0.00
 23 15 10 7.00 0.00
 23 15 11 19.44 0.00
 23 15 12 -17.85 0.00
 23 17 0 -0.15 0.00
 23 17 1 -9.44 0.00
 23 17 2 30.19 0.00
 23 17 3 3.08 0.00
 23 17 4 -10.09 0.00
 23 17 5 4.50 0.00
 23 17 6 0.81 0.00
 23 17 7 -0.31 0.00
 23 17 8 -6.05 0.00
 23 17 9 4.50 0.00
 23 17 10 7.84 0.00
 23 17 11 -6.25 0.00
 23 19 0 16.66 0.00
 23 19 1 9.35 0.00
 23 19 2 -18.04 0.00
 23 19 3 5.56 0.00
 23 19 4 3.65 0.00
 23 19 5 -8.06 0.00
 23 19 6 -10.65 0.00
 23 19 7 3.90 0.00
 23 19 8 22.16 0.00
 23 19 9 7.53 0.00
 23 19 10 -9.13 0.00
 23 21 0 1.13 0.00
 23 21 1 8.11 0.00
 23 21 2 -7.51 0.00
 23 21 3 7.38 0.00
 23 21 4 5.49 0.00
 23 21 5 -30.05 0.00
 23 21 6 3.72 0.00
 23 21 7 1.96 0.00
 23 21 8 0.26 0.00
 23 21 9 4.11 0.00
 23 21 10 8.77 0.00
 23 23 0 -1.49 0.00
 23 23 1 -2.65 0.00
 23 23 2 4.41 0.00
 23 23 3 -1.68 0.00
 23 23 4 -0.46 0.00
 23 23 5 0.90 0.00
 23 23 6 -4.12 0.00
 23 23 7 -5.10 0.00
 23 23 8 12.03 0.00
 23 23 9 5.49 0.00
 23 25 0 3.11 0.00
 23 25 1 4.21 0.00
 23 25 2 -0.07 0.00
 23 25 3 -6.08 0.00
 23 25 4 -6.51 0.00
 23 25 5 6.86 0.00
 23 25 6 12.64 0.00
 23 25 7 -11.02 0.00
 23 27 0 1.26 0.00
 23 27 1 -0.39 0.00
 23 27 2 1.55 0.00
 23 27 3 -1.88 0.00
 23 27 4 1.54 0.00
 23 27 5 -5.04 0.00
 23 27 6 -0.27 0.00
 23 27 7 5.01 0.00
 23 29 0 -2.08 0.00
 23 29 1 -3.46 0.00
 23 29 2 -4.25 0.00
 23 29 3 7.89 0.00
 23 29 4 4.15 0.00
 23 29 5 -8.45 0.00
 23 29 6 -7.22 0.00
 23 31 0 13.84 0.00
 23 31 1 -5.74 0.00
 23 31 2 -15.01 0.00
 23 31 3 -10.31 0.00
 23 31 4 2.81 0.00
 24 0 0 0.09 0.00
 24 0 2 -1.99 0.00
 24 0 4 3.81 0.00
 24 0 6 18.56 0.00
 24 0 8 8.03 0.00
 24 0 10 -6.99 0.00
 24 0 12 8.98 0.00
 24 2 0 -7.03 0.00
 24 2 1 10.50 0.00
 24 2 2 17.15 0.00
 24 2 3 -1.39 0.00
 24 2 4 1.78 0.00
 24 2 5 2.21 0.00
 24 2 6 -4.61 0.00
 24 2 7 -4.92 0.00
 24 2 8 -11.30 0.00
 24 2 9 6.59 0.00
 24 2 10 1.31 0.00
 24 2 11 -7.17 0.00
 24 2 12 -3.78 0.00
 24 4 0 0.01 0.00
 24 4 1 -3.60 0.00
 24 4 2 6.43 0.00
 24 4 3 -12.51 0.00
 24 4 4 2.15 0.00
 24 4 5 0.72 0.00
 24 4 6 3.93 0.00
 24 4 7 2.32 0.00
 24 4 8 -4.09 0.00
 24 4 9 -21.70 0.00
 24 4 10 2.63 0.00
 24 4 11 11.03 0.00
 24 4 12 1.89 0.00
 24 6 0 0.10 0.00
 24 6 1 -9.26 0.00
 24 6 2 1.66 0.00
 24 6 3 7.43 0.00
 24 6 4 -11.57 0.00
 24 6 5 -0.65 0.00
 24 6 6 -8.59 0.00
 24 6 7 8.36 0.00
 24 6 8 -7.36 0.00
 24 6 9 5.47 0.00
 24 6 10 2.41 0.00
 24 6 11 11.40 0.00
 24 6 12 7.12 0.00
 24 8 0 -6.29 0.00
 24 8 1 -2.80 0.00
 24 8 2 1.42 0.00
 24 8 3 3.01 0.00
 24 8 4 0.23 0.00
 24 8 5 -2.23 0.00
 24 8 6 3.39 0.00
 24 8 7 -2.46 0.00
 24 8 8 8.79 0.00
 24 8 9 -1.27 0.00
 24 8 10 3.89 0.00
 24 8 11 -6.53 0.00
 24 8 12 -0.50 0.00
 24 10 0 -10.04 0.00
 24 10 1 -0.72 0.00
 24 10 2 1.27 0.00
 24 10 3 9.36 0.00
 24 10 4 -6.18 0.00
 24 10 5 -10.87 0.00
 24 10 6 -7.23 0.00
 24 10 7 8.29 0.00
 24 10 8 3.01 0.00
 24 10 9 3.26 0.00
 24 10 10 0.67 0.00
 24 10 11 1.73 0.00
 24 10 12 8.16 0.00
 24 12 0 -4.31 0.00
 24 12 1 -9.35 0.00
 24 12 2 22.75 0.00
 24 12 3 -4.79 0.00
 24 12 4 3.46 0.00
 24 12 5 13.13 0.00
 24 12 6 -1.47 0.00
 24 12 7 -13.58 0.00
 24 12 8 11.80 0.00
 24 12 9 7.16 0.00
 24 12 10 -0.07 0.00
 24 12 11 3.41 0.00
 24 14 0 10.77 0.00
 24 14 1 0.29 0.00
 24 14 2 -9.17 0.00
 24 14 3 14.40 0.00
 24 14 4 5.56 0.00
 24 14 5 2.16 0.00
 24 14 6 -1.50 0.00
 24 14 7 10.40 0.00
 24 14 8 1.96 0.00
 24 14 9 -11.90 0.00
 24 14 10 -2.68 0.00
 24 14 11 3.60 0.00
 24 16 0 46.34 0.00
 24 16 1 -1.53 0.00
 24 16 2 -6.21 0.00
 24 16 3 1.90 0.00
 24 16 4 -0.35 0.00
 24 16 5 2.76 0.00
 24 16 6 3.05 0.00
 24 16 7 4.77 0.00
 24 16 8 11.19 0.00
 24 16 9 11.25 0.00
 24 16 10 -2.75 0.00
 24 18 0 -7.94 0.00
 24 18 1 13.44 0.00
 24 18 2 9.17 0.00
 24 18 3 -0.61 0.00
 24 18 4 -7.70 0.00
 24 18 5 -8.76 0.00
 24 18 6 4.86 0.00
 24 18 7 -8.46 0.00
 24 18 8 2.34 0.00
 24 18 9 -15.18 0.00
 24 18 10 4.56 0.00
 24 20 0 -6.44 0.00
 24 20 1 0.07 0.00
 24 20 2 22.24 0.00
 24 20 3 -1.81 0.00
 24 20 4 13.22 0.00
 24 20 5 -1.15 0.00
 24 20 6 -0.81 0.00
 24 20 7 -8.42 0.00
 24 20 8 -3.06 0.00
 24 20 9 16.18 0.00
 24 22 0 8.59 0.00
 24 22 1 -5.96 0.00
 24 22 2 -9.95 0.00
 24 22 3 9.69 0.00
 24 22 4 2.67 0.00
 24 22 5 -0.35 0.00
 24 22 6 8.40 0.00
 24 22 7 -9.13 0.00
 24 22 8 11.83 0.00
 24 24 0 1.98 0.00
 24 24 1 1.74 0.00
 24 24 2 -6.36 0.00
 24 24 3 2.73 0.00
 24 24 4 10.24 0.00
 24 24 5 -1.09 0.00
 24 24 6 -0.22 0.00
 24 24 7 1.65 0.00
 24 26 0 -8.41 0.00
 24 26 1 -6.18 0.00
 24 26 2 0.44 0.00
 24 26 3 -4.22 0.00
 24 26 4 0.71 0.00
 24 26 5 8.53 0.00
 24 26 6 3.59 0.00
 24 28 0 -7.07 0.00
 24 28 1 1.77 0.00
 24 28 2 -1.75 0.00
 24 28 3 -9.39 0.00
 24 28 4 -1.81 0.00
 24 28 5 3.53 0.00
 24 30 0 -1.29 0.00
 24 30 1 -5.89 0.00
 24 30 2 13.35 0.00
 24 30 3 6.59 0.00
 25 1 0 -3.15 0.00
 25 1 1 10.23 0.00
 25 1 2 6.74 0.00
 25 1 3 2.02 0.00
 25 1 4 -0.38 0.00
 25 1 5 4.83 0.00
 25 1 6 11.74 0.00
 25 1 7 1.55 0.00
 25 1 8 -10.44 0.00
 25 1 9 -8.57 0.00
 25 1 10 20.33 0.00
 25 1 11 -7.07 0.00
 25 3 0 -7.81 0.00
 25 3 1 0.08 0.00
 25 3 2 15.62 0.00
 25 3 3 1.09 0.00
 25 3 4 -8.86 0.00
 25 3 5 -0.97 0.00
 25 3 6 3.56 0.00
 25 3 7 -3.79 0.00
 25 3 8 -16.72 0.00
 25 3 9 2.36 0.00
 25 3 10 20.06 0.00
 25 3 11 21.02 0.00
 25 5 0 -2.91 0.00
 25 5 1 3.47 0.00
 25 5 2 -3.85 0.00
 25 5 3 -5.58 0.00
 25 5 4 -8.23 0.00
 25 5 5 7.51 0.00
 25 5 6 9.63 0.00
 25 5 7 -11.82 0.00
 25 5 8 -0.08 0.00
 25 5 9 -1.71 0.00
 25 5 10 6.59 0.00
 25 5 11 -7.14 0.00
 25 7 0 4.39 0.00
 25 7 1 -7.66 0.00
 25 7 2 2.42 0.00
 25 7 3 -3.09 0.00
 25 7 4 9.64 0.00
 25 7 5 -8.99 0.00
 25 7 6 -1.43 0.00
 25 7 7 -5.59 0.00
 25 7 8 -2.64 0.00
 25 7 9 3.98 0.00
 25 7 10 -6.29 0.00
 25 7 11 3.05 0.00
 25 9 0 2.91 0.00
 25 9 1 -1.66 0.00
 25 9 2 -8.04 0.00
 25 9 3 -2.53 0.00
 25 9 4 3.45 0.00
 25 9 5 -2.75 0.00
 25 9 6 0.16 0.00
 25 9 7 2.23 0.00
 25 9 8 2.62 0.00
 25 9 9 -9.76 0.00
 25 9 10 3.12 0.00
 25 9 11 5.00 0.00
 25 11 0 4.45 0.00
 25 11 1 -4.77 0.00
 25 11 2 14.27 0.00
 25 11 3 0.85 0.00
 25 11 4 -11.35 0.00
 25 11 5 -1.56 0.00
 25 11 6 3.68 0.00
 25 11 7 -0.66 0.00
 25 11 8 5.97 0.00
 25 11 9 -5.96 0.00
 25 11 10 -1.24 0.00
 25 11 11 -2.06 0.00
 25 13 0 3.96 0.00
 25 13 1 -1.84 0.00
 25 13 2 4.61 0.00
 25 13 3 -5.82 0.00
 25 13 4 -2.97 0.00
 25 13 5 5.36 0.00
 25 13 6 3.20 0.00
 25 13 7 -7.50 0.00
 25 13 8 4.69 0.00
 25 13 9 -1.34 0.00
 25 13 10 5.58 0.00
 25 15 0 23.06 0.00
 25 15 1 16.12 0.00
 25 15 2 -5.30 0.00
 25 15 3 5.87 0.00
 25 15 4 2.51 0.00
 25 15 5 -3.14 0.00
 25 15 6 0.63 0.00
 25 15 7 -1.10 0.00
 25 15 8 -0.31 0.00
 25 15 9 -7.62 0.00
 25 15 10 2.05 0.00
 25 17 0 6.35 0.00
 25 17 1 -19.30 0.00
 25 17 2 9.25 0.00
 25 17 3 2.55 0.00
 25 17 4 -0.45 0.00
 25 17 5 -1.14 0.00
 25 17 6 -2.70 0.00
 25 17 7 8.68 0.00
 25 17 8 6.73 0.00
 25 17 9 1.81 0.00
 25 19 0 5.06 0.00
 25 19 1 0.03 0.00
 25 19 2 0.79 0.00
 25 19 3 5.67 0.00
 25 19 4 -6.68 0.00
 25 19 5 -9.12 0.00
 25 19 6 5.92 0.00
 25 19 7 2.90 0.00
 25 19 8 7.69 0.00
 25 21 0 6.61 0.00
 25 21 1 12.63 0.00
 25 21 2 -12.33 0.00
 25 21 3 -0.19 0.00
 25 21 4 3.68 0.00
 25 21 5 -16.80 0.00
 25 21 6 -7.67 0.00
 25 21 7 4.10 0.00
 25 23 0 6.76 0.00
 25 23 1 1.93 0.00
 25 23 2 -1.83 0.00
 25 23 3 2.15 0.00
 25 23 4 3.05 0.00
 25 23 5 -11.82 0.00
 25 23 6 -3.43 0.00
 25 25 0 -4.75 0.00
 25 25 1 5.17 0.00
 25 25 2 -1.07 0.00
 25 25 3 2.91 0.00
 25 25 4 6.18 0.00
 25 25 5 -7.53 0.00
 25 27 0 5.99 0.00
 25 27 1 5.19 0.00
 25 27 2 -2.62 0.00
 25 27 3 -1.26 0.00
 25 27 4 2.30 0.00
 25 29 0 -16.42 0.00
 25 29 1 -8.01 0.00
 25 29 2 -12.69 0.00
 26 0 0 1.88 0.00
 26 0 2 8.47 0.00
 26 0 4 0.07 0.00
 26 0 6 -0.12 0.00
 26 0 8 7.70 0.00
 26 0 10 -4.72 0.00
 26 2 1 8.93 0.00
 26 2 2 -0.85 0.00
 26 2 3 -0.99 0.00
 26 2 4 0.92 0.00
 26 2 5 -6.33 0.00
 26 2 6 2.26 0.00
 26 2 7 2.27 0.00
 26 2 8 9.95 0.00
 26 2 9 -21.75 0.00
 26 2 10 6.46 0.00
 26 2 11 9.16 0.00
 26 4 0 12.04 0.00
 26 4 1 14.21 0.00
 26 4 2 -1.00 0.00
 26 4 3 1.37 0.00
 26 4 4 -1.32 0.00
 26 4 5 -1.80 0.00
 26 4 6 2.86 0.00
 26 4 7 -1.03 0.00
 26 4 8 0.57 0.00
 26 4 9 4.79 0.00
 26 4 10 2.93 0.00
 26 4 11 22.55 0.00
 26 6 0 -3.95 0.00
 26 6 1 -18.26 0.00
 26 6 2 3.21 0.00
 26 6 3 -2.07 0.00
 26 6 4 -6.18 0.00
 26 6 5 12.18 0.00
 26 6 6 -2.64 0.00
 26 6 7 -11.15 0.00
 26 6 8 -3.06 0.00
 26 6 9 2.72 0.00
 26 6 10 -2.25 0.00
 26 8 0 -8.16 0.00
 26 8 1 -1.99 0.00
 26 8 2 -0.01 0.00
 26 8 3 5.48 0.00
 26 8 4 1.02 0.00
 26 8 5 -2.21 0.00
 26 8 6 -2.13 0.00
 26 8 7 -3.70 0.00
 26 8 8 4.77 0.00
 26 8 9 3.31 0.00
 26 8 10 4.01 0.00
 26 10 0 9.99 0.00
 26 10 1 2.11 0.00
 26 10 2 -5.84 0.00
 26 10 3 4.17 0.00
 26 10 4 5.18 0.00
 26 10 5 2.63 0.00
 26 10 6 4.99 0.00
 26 10 7 -3.30 0.00
 26 10 8 10.20 0.00
 26 10 9 -0.66 0.00
 26 10 10 3.70 0.00
 26 12 0 -17.47 0.00
 26 12 1 -18.29 0.00
 26 12 2 6.62 0.00
 26 12 3 11.22 0.00
 26 12 4 6.21 0.00
 26 12 5 1.21 0.00
 26 12 6 2.94 0.00
 26 12 7 -0.99 0.00
 26 12 8 -4.10 0.00
 26 12 9 -2.05 0.00
 26 14 0 -9.01 0.00
 26 14 1 -11.06 0.00
 26 14 2 9.77 0.00
 26 14 3 9.46 0.00
 26 14 4 3.52 0.00
 26 14 5 6.52 0.00
 26 14 6 6.65 0.00
 26 14 7 10.99 0.00
 26 14 8 5.16 0.00
 26 14 9 -1.99 0.00
 26 16 0 25.29 0.00
 26 16 1 4.90 0.00
 26 16 2 -11.49 0.00
 26 16 3 5.51 0.00
 26 16 4 0.51 0.00
 26 16 5 -0.56 0.00
 26 16 6 -2.90 0.00
 26 16 7 0.24 0.00
 26 16 8 13.98 0.00
 26 18 0 -4.90 0.00
 26 18 1 9.46 0.00
 26 18 2 2.51 0.00
 26 18 3 -15.73 0.00
 26 18 4 13.35 0.00
 26 18 5 4.55 0.00
 26 18 6 -9.92 0.00
 26 18 7 -12.94 0.00
 26 20 0 1.65 0.00
 26 20 1 1.00 0.00
 26 20 2 7.97 0.00
 26 20 3 3.07 0.00
 26 20 4 -8.23 0.00
 26 20 5 -3.81 0.00
 26 20 6 4.74 0.00
 26 22 0 0.33 0.00
 26 22 1 -1.80 0.00
 26 22 2 10.42 0.00
 26 22 3 6.04 0.00
 26 22 4 -3.68 0.00
 26 22 5 4.76 0.00
 26 24 0 -13.87 0.00
 26 24 1 1.12 0.00
 26 24 2 -6.95 0.00
 26 24 3 0.86 0.00
 26 24 4 -1.15 0.00
 26 26 0 5.30 0.00
 26 26 1 -5.97 0.00
 26 26 2 -17.55 0.00
 26 26 3 10.57 0.00
 27 1 0 -8.97 0.00
 27 1 1 5.87 0.00
 27 1 2 17.58 0.00
 27 1 3 -1.53 0.00
 27 1 4 -2.38 0.00
 27 1 5 -2.16 0.00
 27 1 6 15.03 0.00
 27 1 7 -10.68 0.00
 27 1 8 -5.19 0.00
 27 1 9 4.72 0.00
 27 1 10 26.86 0.00
 27 3 0 2.27 0.00
 27 3 1 22.02 0.00
 27 3 2 -2.86 0.00
 27 3 3 -10.67 0.00
 27 3 4 -2.08 0.00
 27 3 5 12.19 0.00
 27 3 6 1.21 0.00
 27 3 7 6.38 0.00
 27 3 8 8.08 0.00
 27 3 9 -0.57 0.00
 27 3 10 -12.03 0.00
 27 5 0 1.55 0.00
 27 5 1 -8.68 0.00
 27 5 2 11.06 0.00
 27 5 3 7.83 0.00
 27 5 4 2.52 0.00
 27 5 5 -7.29 0.00
 27 5 6 -4.25 0.00
 27 5 7 3.87 0.00
 27 5 8 10.60 0.00
 27 5 9 -10.47 0.00
 27 7 0 -12.15 0.00
 27 7 1 -5.31 0.00
 27 7 2 5.08 0.00
 27 7 3 2.25 0.00
 27 7 4 0.83 0.00
 27 7 5 1.41 0.00
 27 7 6 2.52 0.00
 27 7 7 -4.38 0.00
 27 7 8 -7.43 0.00
 27 7 9 3.00 0.00
 27 9 0 9.60 0.00
 27 9 1 -2.05 0.00
 27 9 2 -5.94 0.00
 27 9 3 1.77 0.00
 27 9 4 -0.98 0.00
 27 9 5 -6.43 0.00
 27 9 6 2.17 0.00
 27 9 7 -4.89 0.00
 27 9 8 7.76 0.00
 27 9 9 2.51 0.00
 27 11 0 5.73 0.00
 27 11 1 -7.94 0.00
 27 11 2 2.27 0.00
 27 11 3 -2.89 0.00
 27 11 4 -2.31 0.00
 27 11 5 -1.36 0.00
 27 11 6 2.01 0.00
 27 11 7 0.21 0.00
 27 11 8 1.07 0.00
 27 13 0 -9.44 0.00
 27 13 1 19.62 0.00
 27 13 2 16.88 0.00
 27 13 3 0.62 0.00
 27 13 4 -14.54 0.00
 27 13 5 -0.45 0.00
 27 13 6 -4.32 0.00
 27 13 7 8.97 0.00
 27 13 8 13.78 0.00
 27 15 0 0.90 0.00
 27 15 1 0.86 0.00
 27 15 2 2.19 0.00
 27 15 3 4.03 0.00
 27 15 4 -0.97 0.00
 27 15 5 -1.69 0.00
 27 15 6 -5.16 0.00
 27 17 0 19.43 0.00
 27 17 1 -6.81 0.00
 27 17 2 -13.24 0.00
 27 17 3 5.61 0.00
 27 17 4 15.49 0.00
 27 17 5 -4.15 0.00
 27 17 6 -11.42 0.00
 27 19 0 -9.42 0.00
 27 19 1 -1.69 0.00
 27 19 2 -0.06 0.00
 27 19 3 0.44 0.00
 27 19 4 -0.15 0.00
 27 19 5 1.72 0.00
 27 21 0 -5.64 0.00
 27 21 1 1.77 0.00
 27 21 2 -1.76 0.00
 27 21 3 -0.39 0.00
 27 21 4 -0.45 0.00
 27 23 0 -2.63 0.00
 27 23 1 1.42 0.00
 27 23 2 0.08 0.00
 27 23 3 1.99 0.00
 28 0 0 13.83 0.00
 28 0 2 -6.17 0.00
 28 0 4 2.74 0.00
 28 0 6 7.56 0.00
 28 0 8 1.75 0.00
 28 2 0 13.71 0.00
 28 2 1 4.37 0.00
 28 2 2 5.27 0.00
 28 2 3 9.42 0.00
 28 2 4 -9.13 0.00
 28 2 5 -6.80 0.00
 28 2 6 -1.18 0.00
 28 2 7 3.50 0.00
 28 2 8 13.25 0.00
 28 4 0 1.12 0.00
 28 4 1 -12.24 0.00
 28 4 2 -2.89 0.00
 28 4 3 13.67 0.00
 28 4 4 -3.72 0.00
 28 4 5 -8.43 0.00
 28 4 6 -5.89 0.00
 28 4 7 -8.94 0.00
 28 4 8 21.03 0.00
 28 6 0 11.60 0.00
 28 6 1 7.45 0.00
 28 6 2 -0.81 0.00
 28 6 3 0.58 0.00
 28 6 4 2.69 0.00
 28 6 5 0.63 0.00
 28 6 6 -1.69 0.00
 28 6 7 -0.38 0.00
 28 6 8 0.73 0.00
 28 8 0 -16.09 0.00
 28 8 1 6.25 0.00
 28 8 2 6.28 0.00
 28 8 3 -5.89 0.00
 28 8 4 -2.70 0.00
 28 8 5 2.95 0.00
 28 8 6 0.17 0.00
 28 8 7 -6.16 0.00
 28 10 0 1.11 0.00
 28 10 1 -21.06 0.00
 28 10 2 2.22 0.00
 28 10 3 11.85 0.00
 28 10 4 8.22 0.00
 28 10 5 0.80 0.00
 28 10 6 7.14 0.00
 28 10 7 -2.02 0.00
 28 12 0 -4.05 0.00
 28 12 1 10.11 0.00
 28 12 2 -13.97 0.00
 28 12 3 2.77 0.00
 28 12 4 9.68 0.00
 28 12 5 6.15 0.00
 28 12 6 -1.03 0.00
 28 14 0 4.34 0.00
 28 14 1 4.54 0.00
 28 14 2 -1.18 0.00
 28 14 3 -0.31 0.00
 28 14 4 14.38 0.00
 28 14 5 -4.31 0.00
 28 16 0 -7.29 0.00
 28 16 1 -11.65 0.00
 28 16 2 -2.41 0.00
 28 16 3 7.98 0.00
 28 16 4 7.07 0.00
 28 16 5 8.17 0.00
 28 18 0 -7.72 0.00
 28 18 1 2.57 0.00
 28 18 2 8.91 0.00
 28 18 3 3.37 0.00
 28 18 4 -5.06 0.00
 28 20 0 -11.09 0.00
 28 20 1 5.07 0.00
 28 20 2 10.52 0.00
 28 20 3 -4.06 0.00
 28 22 0 0.31 0.00
 28 22 1 -4.22 0.00
 29 1 0 -1.46 0.00
 29 1 1 8.41 0.00
 29 1 2 1.65 0.00
 29 1 3 9.15 0.00
 29 1 4 11.91 0.00
 29 1 5 1.03 0.00
 29 1 6 0.87 0.00
 29 1 7 -0.31 0.00
 29 3 0 -4.37 0.00
 29 3 1 2.43 0.00
 29 3 2 8.29 0.00
 29 3 3 -14.31 0.00
 29 3 4 -7.52 0.00
 29 3 5 -6.69 0.00
 29 3 6 12.49 0.00
 29 3 7 14.94 0.00
 29 5 0 -5.12 0.00
 29 5 1 8.49 0.00
 29 5 2 13.85 0.00
 29 5 3 9.72 0.00
 29 5 4 -1.70 0.00
 29 5 5 17.69 0.00
 29 5 6 -3.17 0.00
 29 7 0 1.59 0.00
 29 7 1 -19.67 0.00
 29 7 2 3.15 0.00
 29 7 3 0.42 0.00
 29 7 4 2.54 0.00
 29 7 5 -11.82 0.00
 29 7 6 -4.67 0.00
 29 9 0 8.24 0.00
 29 9 1 9.17 0.00
 29 9 2 -6.66 0.00
 29 9 3 1.84 0.00
 29 9 4 -3.04 0.00
 29 9 5 3.30 0.00
 29 11 0 -2.64 0.00
 29 11 1 -8.00 0.00
 29 11 2 7.25 0.00
 29 11 3 -2.56 0.00
 29 11 4 2.43 0.00
 29 11 5 -6.06 0.00
 29 13 0 -0.96 0.00
 29 13 1 -3.09 0.00
 29 13 2 6.96 0.00
 29 13 3 17.15 0.00
 29 13 4 -3.37 0.00
 29 15 0 -4.31 0.00
 29 15 1 2.02 0.00
 29 15 2 8.94 0.00
 29 15 3 5.88 0.00
 29 17 0 -1.98 0.00
 29 17 1 7.95 0.00
 29 17 2 -2.70 0.00
 30 0 0 -1.11 0.00
 30 0 2 1.15 0.00
 30 0 4 3.01 0.00
 30 2 0 9.09 0.00
 30 2 1 -0.63 0.00
 30 2 2 11.76 0.00
 30 2 3 3.84 0.00
 30 2 4 -16.76 0.00
 30 2 5 -8.31 0.00
 30 4 0 -4.72 0.00
 30 4 1 -8.71 0.00
 30 4 2 -12.18 0.00
 30 4 3 15.95 0.00
 30 4 4 9.94 0.00
 30 4 5 8.00 0.00
 30 6 0 3.59 0.00
 30 6 1 7.48 0.00
 30 6 2 18.46 0.00
 30 6 3 -5.38 0.00
 30 6 4 -15.17 0.00
 30 6 5 -24.32 0.00
 30 8 0 -8.48 0.00
 30 8 1 5.10 0.00
 30 8 2 0.15 0.00
 30 8 3 1.14 0.00
 30 8 4 8.49 0.00
 30 10 0 11.07 0.00
 30 10 1 -19.75 0.00
 30 10 2 -2.74 0.00
 30 10 3 6.89 0.00
 30 12 0 -7.84 0.00
 30 12 1 1.33 0.00
 30 12 2 -4.63 0.00
 30 14 0 8.02 0.00
 30 14 1 8.81 0.00
 31 1 0 -8.71 0.00
 31 1 1 -9.25 0.00
 31 1 2 10.89 0.00
 31 1 3 6.67 0.00
 31 3 0 4.81 0.00
 31 3 1 -0.63 0.00
 31 3 2 -19.93 0.00
 31 3 3 -7.72 0.00
 31 5 0 1.44 0.00
 31 5 1 -4.00 0.00
 31 5 2 20.46 0.00
 31 7 0 -4.10 0.00
 31 7 1 -0.68 0.00
 2 0 0 453.26 0.00
 1 1 0 109.93 0.00
 0 2 0 -105.74 0.00
 26 2 0 8.68 0.00
 0 4 0 79.81 0.00
 31 9 0 21.56 0.00
 31 11 0 -22.76 0.00
 31 13 0 11.33 0.00
 31 15 0 13.08 0.00
 30 16 0 -4.19 0.00
 31 17 0 -4.02 0.00
 30 18 0 -6.13 0.00
 29 19 0 12.89 0.00
 31 19 0 -6.82 0.00
 30 20 0 9.98 0.00
 29 21 0 -22.46 0.00
 31 21 0 6.04 0.00
 30 22 0 -16.32 0.00
 29 23 0 -2.24 0.00
 31 23 0 -4.29 0.00
 28 24 0 1.86 0.00
 30 24 0 -3.46 0.00
 27 25 0 18.15 0.00
 29 25 0 11.19 0.00
 28 26 0 -16.72 0.00
 30 26 0 4.88 0.00
 27 27 0 -2.22 0.00
 29 27 0 2.46 0.00
 26 28 0 -14.45 0.00
 28 28 0 -0.38 0.00
 27 29 0 -16.48 0.00
 29 29 0 -19.54 0.00
 26 30 0 -20.73 0.00
 28 30 0 -5.72 0.00
 25 31 0 1.87 0.00
 27 31 0 -5.16 0.00
 24 32 0 -7.05 0.00
 26 32 0 -6.32 0.00
 28 32 0 -6.41 0.00
 23 33 0 -10.58 0.00
 25 33 0 -3.06 0.00
 27 33 0 -2.80 0.00
 24 34 0 -7.05 0.00
 26 34 0 -4.93 0.00
 23 35 0 3.37 0.00
 25 35 0 5.67 0.00
 22 36 0 1.58 0.00
 24 36 0 -6.99 0.00
 26 36 0 -8.28 0.00
 21 37 0 -1.14 0.00
 23 37 0 1.71 0.00
 25 37 0 -1.28 0.00
 20 38 0 3.86 0.00
 22 38 0 -4.38 0.00
 24 38 0 2.13 0.00
 19 39 0 -5.30 0.00
 21 39 0 3.51 0.00
 23 39 0 -0.41 0.00
 18 40 0 2.64 0.00
 20 40 0 -11.25 0.00
 22 40 0 -5.75 0.00
 17 41 0 -3.33 0.00
 19 41 0 3.44 0.00
 21 41 0 3.00 0.00
 16 42 0 1.78 0.00
 18 42 0 -6.30 0.00
 20 42 0 -10.05 0.00
 13 43 0 3.51 0.00
 15 43 0 19.82 0.00
 17 43 0 7.31 0.00
 19 43 0 0.37 0.00
 21 43 0 3.04 0.00
 10 44 0 -11.93 0.00
 12 44 0 -6.68 0.00
 14 44 0 1.62 0.00
 16 44 0 -1.56 0.00
 18 44 0 -10.34 0.00
 20 44 0 3.05 0.00
 9 45 0 -1.03 0.00
 11 45 0 18.03 0.00
 13 45 0 14.55 0.00
 15 45 0 -4.53 0.00
 17 45 0 -2.77 0.00
 19 45 0 4.14 0.00
 8 46 0 4.86 0.00
 10 46 0 1.36 0.00
 12 46 0 -9.99 0.00
 14 46 0 -5.03 0.00
 16 46 0 2.41 0.00
 18 46 0 6.80 0.00
 7 47 0 -6.90 0.00
 9 47 0 -12.70 0.00
 11 47 0 -8.94 0.00
 13 47 0 1.78 0.00
 15 47 0 1.88 0.00
 17 47 0 -4.86 0.00
 6 48 0 6.66 0.00
 8 48 0 0.14 0.00
 10 48 0 -0.57 0.00
 12 48 0 -0.16 0.00
 14 48 0 -2.69 0.00
 31 9 1 -4.06 0.00
 31 11 1 6.46 0.00
 31 13 1 -5.66 0.00
 31 15 1 -8.81 0.00
 30 16 1 6.31 0.00
 31 17 1 5.07 0.00
 30 18 1 -5.21 0.00
 29 19 1 18.12 0.00
 31 19 1 6.18 0.00
 30 20 1 -6.08 0.00
 29 21 1 -5.72 0.00
 31 21 1 9.09 0.00
 30 22 1 12.93 0.00
 29 23 1 -4.03 0.00
 31 23 1 0.18 0.00
 28 24 1 1.10 0.00
 30 24 1 9.49 0.00
 27 25 1 2.90 0.00
 29 25 1 -2.58 0.00
 28 26 1 3.24 0.00
 30 26 1 3.16 0.00
 27 27 1 1.11 0.00
 29 27 1 4.87 0.00
 26 28 1 -16.58 0.00
 28 28 1 3.06 0.00
 27 29 1 1.60 0.00
 29 29 1 -2.13 0.00
 26 30 1 13.86 0.00
 28 30 1 -4.26 0.00
 25 31 1 -9.42 0.00
 27 31 1 -1.39 0.00
 24 32 1 -5.62 0.00
 26 32 1 -0.47 0.00
 28 32 1 0.49 0.00
 23 33 1 -3.91 0.00
 25 33 1 -2.90 0.00
 27 33 1 -10.44 0.00
 24 34 1 5.55 0.00
 26 34 1 -4.48 0.00
 23 35 1 -9.99 0.00
 25 35 1 -7.08 0.00
 22 36 1 2.89 0.00
 24 36 1 7.94 0.00
 21 37 1 -10.73 0.00
 23 37 1 5.87 0.00
 25 37 1 -0.27 0.00
 20 38 1 9.75 0.00
 22 38 1 -0.41 0.00
 24 38 1 6.13 0.00
 19 39 1 -5.00 0.00
 21 39 1 3.10 0.00
 23 39 1 -6.65 0.00
 18 40 1 10.32 0.00
 20 40 1 8.79 0.00
 22 40 1 10.74 0.00
 17 41 1 -7.61 0.00
 19 41 1 5.58 0.00
 21 41 1 4.16 0.00
 16 42 1 3.45 0.00
 18 42 1 4.25 0.00
 20 42 1 1.30 0.00
 15 43 1 3.88 0.00
 17 43 1 -1.30 0.00
 19 43 1 7.72 0.00
 21 43 1 2.60 0.00
 10 44 1 15.91 0.00
 12 44 1 16.47 0.00
 14 44 1 -13.68 0.00
 16 44 1 0.93 0.00
 18 44 1 -1.32 0.00
 20 44 1 -0.44 0.00
 9 45 1 11.91 0.00
 11 45 1 16.30 0.00
 13 45 1 4.82 0.00
 15 45 1 3.95 0.00
 17 45 1 13.47 0.00
 19 45 1 -0.59 0.00
 8 46 1 3.38 0.00
 10 46 1 16.52 0.00
 12 46 1 0.09 0.00
 14 46 1 11.15 0.00
 16 46 1 -1.12 0.00
 18 46 1 0.44 0.00
 7 47 1 -2.59 0.00
 9 47 1 5.61 0.00
 11 47 1 4.17 0.00
 13 47 1 10.35 0.00
 15 47 1 4.77 0.00
 17 47 1 -0.47 0.00
 6 48 1 7.29 0.00
 8 48 1 21.71 0.00
 10 48 1 13.95 0.00
 12 48 1 11.27 0.00
 14 48 1 2.66 0.00
 31 7 2 0.20 0.00
 31 9 2 -6.30 0.00
 31 11 2 19.34 0.00
 31 13 2 -3.63 0.00
 30 14 2 -7.94 0.00
 31 15 2 -5.38 0.00
 30 16 2 10.03 0.00
 31 17 2 -2.75 0.00
 30 18 2 -10.78 0.00
 29 19 2 -20.61 0.00
 31 19 2 6.11 0.00
 30 20 2 7.92 0.00
 29 21 2 14.39 0.00
 31 21 2 -10.97 0.00
 28 22 2 -2.18 0.00
 30 22 2 8.13 0.00
 29 23 2 -8.54 0.00
 31 23 2 3.46 0.00
 28 24 2 -8.36 0.00
 30 24 2 1.47 0.00
 27 25 2 -20.43 0.00
 29 25 2 -11.73 0.00
 28 26 2 5.15 0.00
 30 26 2 -4.22 0.00
 27 27 2 -7.01 0.00
 29 27 2 -7.62 0.00
 26 28 2 8.20 0.00
 28 28 2 -2.48 0.00
 27 29 2 -1.34 0.00
 29 29 2 1.70 0.00
 26 30 2 12.64 0.00
 28 30 2 1.50 0.00
 25 31 2 12.37 0.00
 27 31 2 -9.50 0.00
 24 32 2 0.74 0.00
 26 32 2 1.92 0.00
 23 33 2 9.00 0.00
 25 33 2 -22.70 0.00
 27 33 2 -0.88 0.00
 24 34 2 4.54 0.00
 26 34 2 -2.94 0.00
 23 35 2 -3.00 0.00
 25 35 2 -1.63 0.00
 22 36 2 3.51 0.00
 24 36 2 1.04 0.00
 21 37 2 11.24 0.00
 23 37 2 -0.53 0.00
 25 37 2 0.31 0.00
 20 38 2 -11.80 0.00
 22 38 2 2.46 0.00
 24 38 2 -2.39 0.00
 19 39 2 6.03 0.00
 21 39 2 4.15 0.00
 23 39 2 10.94 0.00
 18 40 2 -5.69 0.00
 20 40 2 5.03 0.00
 22 40 2 1.25 0.00
 17 41 2 2.97 0.00
 19 41 2 4.27 0.00
 21 41 2 1.64 0.00
 16 42 2 -4.39 0.00
 18 42 2 3.99 0.00
 20 42 2 2.31 0.00
 15 43 2 3.31 0.00
 17 43 2 1.72 0.00
 19 43 2 6.80 0.00
 14 44 2 -4.90 0.00
 16 44 2 -4.24 0.00
 18 44 2 3.34 0.00
 11 45 2 -14.16 0.00
 13 45 2 -3.75 0.00
 15 45 2 4.78 0.00
 17 45 2 6.35 0.00
 19 45 2 0.87 0.00
 10 46 2 3.23 0.00
 12 46 2 8.75 0.00
 14 46 2 -5.40 0.00
 16 46 2 -3.78 0.00
 9 47 2 6.71 0.00
 11 47 2 7.03 0.00
 13 47 2 -5.44 0.00
 15 47 2 -5.48 0.00
 6 48 2 0.26 0.00
 8 48 2 5.55 0.00
 10 48 2 4.67 0.00
 12 48 2 0.40 0.00
 14 48 2 4.89 0.00
 31 5 3 11.96 0.00
 31 7 3 -15.99 0.00
 31 9 3 1.85 0.00
 31 11 3 -1.61 0.00
 30 12 3 4.60 0.00
 31 13 3 5.96 0.00
 30 14 3 -0.66 0.00
 31 15 3 13.03 0.00
 30 16 3 -5.18 0.00
 29 17 3 -3.29 0.00
 31 17 3 -2.14 0.00
 30 18 3 5.49 0.00
 29 19 3 0.74 0.00
 31 19 3 5.12 0.00
 30 20 3 12.51 0.00
 29 21 3 0.28 0.00
 31 21 3 -8.68 0.00
 28 22 3 8.80 0.00
 30 22 3 -6.25 0.00
 29 23 3 9.37 0.00
 31 23 3 4.70 0.00
 28 24 3 5.94 0.00
 30 24 3 7.73 0.00
 27 25 3 11.29 0.00
 29 25 3 5.37 0.00
 28 26 3 1.32 0.00
 30 26 3 -0.66 0.00
 27 27 3 9.21 0.00
 29 27 3 4.60 0.00
 26 28 3 -4.97 0.00
 28 28 3 -0.83 0.00
 25 29 3 4.04 0.00
 27 29 3 -0.62 0.00
 29 29 3 2.00 0.00
 26 30 3 0.04 0.00
 28 30 3 4.09 0.00
 25 31 3 -10.66 0.00
 27 31 3 -8.96 0.00
 24 32 3 -13.20 0.00
 26 32 3 -13.08 0.00
 23 33 3 -9.01 0.00
 25 33 3 -2.13 0.00
 27 33 3 2.52 0.00
 22 34 3 -15.84 0.00
 24 34 3 5.85 0.00
 26 34 3 12.16 0.00
 23 35 3 4.22 0.00
 25 35 3 2.24 0.00
 22 36 3 1.76 0.00
 24 36 3 -4.41 0.00
 21 37 3 5.74 0.00
 23 37 3 2.73 0.00
 20 38 3 -4.18 0.00
 22 38 3 5.33 0.00
 24 38 3 -2.28 0.00
 19 39 3 4.71 0.00
 21 39 3 -2.45 0.00
 23 39 3 -3.31 0.00
 18 40 3 -0.67 0.00
 20 40 3 1.12 0.00
 22 40 3 -9.30 0.00
 17 41 3 10.81 0.00
 19 41 3 -7.19 0.00
 21 41 3 -1.80 0.00
 16 42 3 16.29 0.00
 18 42 3 3.39 0.00
 20 42 3 -3.21 0.00
 15 43 3 -4.62 0.00
 17 43 3 -0.35 0.00
 19 43 3 -1.12 0.00
 14 44 3 14.26 0.00
 16 44 3 -0.97 0.00
 18 44 3 4.18 0.00
 11 45 3 -16.35 0.00
 13 45 3 -3.61 0.00
 15 45 3 -3.41 0.00
 17 45 3 -5.66 0.00
 10 46 3 1.85 0.00
 12 46 3 3.59 0.00
 14 46 3 0.61 0.00
 16 46 3 5.13 0.00
 7 47 3 6.26 0.00
 9 47 3 -6.92 0.00
 11 47 3 6.21 0.00
 13 47 3 -8.45 0.00
 15 47 3 4.32 0.00
 0 48 3 -9.04 0.00
 2 48 3 1.40 0.00
 4 48 3 3.05 0.00
 6 48 3 -0.36 0.00
 8 48 3 -6.52 0.00
 10 48 3 2.13 0.00
 12 48 3 3.09 0.00
 14 48 3 4.29 0.00
 31 1 4 0.82 0.00
 31 3 4 12.44 0.00
 31 5 4 7.24 0.00
 31 7 4 -15.61 0.00
 31 9 4 2.52 0.00
 30 10 4 8.59 0.00
 31 11 4 1.60 0.00
 30 12 4 12.71 0.00
 31 13 4 -3.06 0.00
 30 14 4 -0.06 0.00
 29 15 4 -6.58 0.00
 31 15 4 4.73 0.00
 30 16 4 3.49 0.00
 29 17 4 2.40 0.00
 31 17 4 -5.33 0.00
 30 18 4 6.53 0.00
 29 19 4 16.47 0.00
 31 19 4 -2.43 0.00
 28 20 4 1.85 0.00
 30 20 4 -2.70 0.00
 29 21 4 -9.46 0.00
 31 21 4 5.65 0.00
 28 22 4 4.00 0.00
 30 22 4 0.80 0.00
 27 23 4 0.68 0.00
 29 23 4 8.20 0.00
 28 24 4 1.64 0.00
 30 24 4 -0.09 0.00
 27 25 4 10.07 0.00
 29 25 4 6.27 0.00
 26 26 4 16.17 0.00
 28 26 4 -8.31 0.00
 27 27 4 -1.30 0.00
 29 27 4 0.82 0.00
 26 28 4 -3.92 0.00
 28 28 4 -2.21 0.00
 25 29 4 -0.67 0.00
 27 29 4 2.97 0.00
 24 30 4 -16.40 0.00
 26 30 4 -17.11 0.00
 28 30 4 -0.03 0.00
 25 31 4 -14.04 0.00
 27 31 4 -2.52 0.00
 24 32 4 2.69 0.00
 26 32 4 0.91 0.00
 23 33 4 3.70 0.00
 25 33 4 16.90 0.00
 22 34 4 9.10 0.00
 24 34 4 0.87 0.00
 26 34 4 2.79 0.00
 21 35 4 4.80 0.00
 23 35 4 -1.36 0.00
 25 35 4 0.30 0.00
 22 36 4 1.13 0.00
 24 36 4 0.56 0.00
 21 37 4 -13.97 0.00
 23 37 4 -3.30 0.00
 20 38 4 -3.42 0.00
 22 38 4 -7.70 0.00
 19 39 4 -3.06 0.00
 21 39 4 -9.51 0.00
 23 39 4 -8.16 0.00
 18 40 4 -2.25 0.00
 20 40 4 1.85 0.00
 22 40 4 -1.30 0.00
 17 41 4 -13.25 0.00
 19 41 4 -11.77 0.00
 21 41 4 -4.26 0.00
 16 42 4 -5.29 0.00
 18 42 4 -2.47 0.00
 20 42 4 -2.60 0.00
 15 43 4 -15.34 0.00
 17 43 4 1.57 0.00
 19 43 4 -6.72 0.00
 12 44 4 4.78 0.00
 14 44 4 8.03 0.00
 16 44 4 6.18 0.00
 18 44 4 -5.13 0.00
 11 45 4 12.89 0.00
 13 45 4 -0.18 0.00
 15 45 4 5.49 0.00
 17 45 4 -3.25 0.00
 8 46 4 3.62 0.00
 10 46 4 -0.32 0.00
 12 46 4 -0.97 0.00
 14 46 4 10.75 0.00
 16 46 4 3.62 0.00
 7 47 4 -4.10 0.00
 9 47 4 -1.81 0.00
 11 47 4 -2.04 0.00
 13 47 4 2.65 0.00
 15 47 4 -5.48 0.00
 0 48 4 7.95 0.00
 2 48 4 3.18 0.00
 4 48 4 -3.67 0.00
 6 48 4 -3.83 0.00
 8 48 4 -5.37 0.00
 10 48 4 -0.35 0.00
 12 48 4 -1.26 0.00
 14 48 4 -4.58 0.00
 31 1 5 -1.72 0.00
 31 3 5 5.19 0.00
 31 5 5 -0.24 0.00
 31 7 5 8.85 0.00
 30 8 5 -3.71 0.00
 31 9 5 -2.59 0.00
 30 10 5 6.76 0.00
 31 11 5 -3.24 0.00
 30 12 5 -7.74 0.00
 29 13 5 -3.25 0.00
 31 13 5 3.91 0.00
 30 14 5 13.50 0.00
 29 15 5 1.96 0.00
 31 15 5 6.48 0.00
 30 16 5 -0.06 0.00
 29 17 5 2.59 0.00
 31 17 5 -6.62 0.00
 28 18 5 -2.14 0.00
 30 18 5 2.08 0.00
 29 19 5 3.59 0.00
 31 19 5 2.92 0.00
 28 20 5 9.62 0.00
 30 20 5 -0.01 0.00
 27 21 5 -0.69 0.00
 29 21 5 -2.86 0.00
 31 21 5 0.28 0.00
 28 22 5 8.74 0.00
 30 22 5 5.66 0.00
 27 23 5 -13.13 0.00
 29 23 5 -0.68 0.00
 26 24 5 9.77 0.00
 28 24 5 4.29 0.00
 30 24 5 3.59 0.00
 27 25 5 -1.13 0.00
 29 25 5 0.79 0.00
 26 26 5 -4.71 0.00
 28 26 5 7.24 0.00
 25 27 5 2.70 0.00
 27 27 5 -8.17 0.00
 29 27 5 6.51 0.00
 26 28 5 2.23 0.00
 28 28 5 -2.62 0.00
 25 29 5 -3.43 0.00
 27 29 5 0.62 0.00
 24 30 5 -8.34 0.00
 26 30 5 3.84 0.00
 23 31 5 4.91 0.00
 25 31 5 -2.41 0.00
 27 31 5 2.57 0.00
 24 32 5 4.58 0.00
 26 32 5 -0.19 0.00
 23 33 5 -2.81 0.00
 25 33 5 1.06 0.00
 22 34 5 10.65 0.00
 24 34 5 -0.77 0.00
 21 35 5 -3.12 0.00
 23 35 5 -2.02 0.00
 25 35 5 -1.88 0.00
 20 36 5 3.95 0.00
 22 36 5 1.07 0.00
 24 36 5 0.36 0.00
 19 37 5 -1.20 0.00
 21 37 5 -6.00 0.00
 23 37 5 -0.99 0.00
 18 38 5 2.30 0.00
 20 38 5 5.86 0.00
 22 38 5 1.38 0.00
 19 39 5 -4.49 0.00
 21 39 5 9.47 0.00
 18 40 5 -3.06 0.00
 20 40 5 -1.44 0.00
 22 40 5 5.53 0.00
 15 41 5 8.53 0.00
 17 41 5 -7.84 0.00
 19 41 5 9.36 0.00
 21 41 5 -4.94 0.00
 14 42 5 -19.24 0.00
 16 42 5 -9.83 0.00
 18 42 5 0.21 0.00
 20 42 5 5.82 0.00
 13 43 5 4.83 0.00
 15 43 5 5.81 0.00
 17 43 5 4.23 0.00
 19 43 5 1.57 0.00
 10 44 5 -1.54 0.00
 12 44 5 -8.91 0.00
 14 44 5 -17.29 0.00
 16 44 5 -8.14 0.00
 18 44 5 -5.10 0.00
 9 45 5 -9.09 0.00
 11 45 5 7.99 0.00
 13 45 5 8.32 0.00
 15 45 5 -2.98 0.00
 17 45 5 3.31 0.00
 6 46 5 10.33 0.00
 8 46 5 1.66 0.00
 10 46 5 -6.43 0.00
 12 46 5 -5.43 0.00
 14 46 5 -6.47 0.00
 16 46 5 -11.09 0.00
 3 47 5 0.33 0.00
 5 47 5 -3.02 0.00
 7 47 5 -1.10 0.00
 9 47 5 3.71 0.00
 11 47 5 0.37 0.00
 13 47 5 6.92 0.00
 15 47 5 2.03 0.00
 0 48 5 9.44 0.00
 2 48 5 2.13 0.00
 4 48 5 2.29 0.00
 6 48 5 4.50 0.00
 8 48 5 8.13 0.00
 10 48 5 -0.25 0.00
 12 48 5 -3.18 0.00
 30 0 6 5.72 0.00
 31 1 6 9.56 0.00
 30 2 6 -15.06 0.00
 31 3 6 -6.08 0.00
 30 4 6 18.68 0.00
 31 5 6 -6.94 0.00
 30 6 6 -20.57 0.00
 31 7 6 7.47 0.00
 30 8 6 14.07 0.00
 29 9 6 -0.03 0.00
 31 9 6 -5.95 0.00
 30 10 6 -10.76 0.00
 29 11 6 -13.07 0.00
 31 11 6 -22.40 0.00
 30 12 6 -3.03 0.00
 29 13 6 -19.98 0.00
 31 13 6 -6.56 0.00
 28 14 6 0.02 0.00
 30 14 6 2.02 0.00
 29 15 6 -6.07 0.00
 31 15 6 -10.46 0.00
 28 16 6 -11.71 0.00
 30 16 6 -4.46 0.00
 29 17 6 -12.45 0.00
 31 17 6 -2.14 0.00
 28 18 6 0.33 0.00
 30 18 6 -6.28 0.00
 27 19 6 -7.78 0.00
 29 19 6 -5.24 0.00
 31 19 6 6.63 0.00
 28 20 6 -7.03 0.00
 30 20 6 -5.28 0.00
 27 21 6 8.07 0.00
 29 21 6 5.72 0.00
 26 22 6 7.80 0.00
 28 22 6 -3.13 0.00
 30 22 6 -3.62 0.00
 27 23 6 -2.68 0.00
 29 23 6 6.17 0.00
 26 24 6 12.01 0.00
 28 24 6 4.93 0.00
 25 25 6 1.09 0.00
 27 25 6 3.91 0.00
 29 25 6 -3.36 0.00
 26 26 6 -9.35 0.00
 28 26 6 9.44 0.00
 25 27 6 -0.26 0.00
 27 27 6 1.71 0.00
 24 28 6 5.36 0.00
 26 28 6 1.42 0.00
 28 28 6 0.08 0.00
 25 29 6 6.28 0.00
 27 29 6 2.50 0.00
 24 30 6 8.48 0.00
 26 30 6 5.07 0.00
 23 31 6 4.44 0.00
 25 31 6 3.25 0.00
 22 32 6 0.19 0.00
 24 32 6 -3.78 0.00
 26 32 6 3.00 0.00
 21 33 6 -4.12 0.00
 23 33 6 1.09 0.00
 25 33 6 2.25 0.00
 22 34 6 -3.58 0.00
 24 34 6 -1.19 0.00
 21 35 6 -3.92 0.00
 23 35 6 -2.10 0.00
 20 36 6 1.08 0.00
 22 36 6 3.66 0.00
 24 36 6 6.36 0.00
 19 37 6 -2.74 0.00
 21 37 6 6.64 0.00
 23 37 6 -1.99 0.00
 18 38 6 -6.03 0.00
 20 38 6 -1.68 0.00
 22 38 6 -1.11 0.00
 17 39 6 -2.47 0.00
 19 39 6 1.13 0.00
 21 39 6 1.01 0.00
 16 40 6 6.78 0.00
 18 40 6 2.53 0.00
 20 40 6 -0.22 0.00
 15 41 6 -5.23 0.00
 17 41 6 7.20 0.00
 19 41 6 2.55 0.00
 14 42 6 -4.05 0.00
 16 42 6 -2.38 0.00
 18 42 6 0.28 0.00
 11 43 6 -12.08 0.00
 13 43 6 -5.89 0.00
 15 43 6 -8.06 0.00
 17 43 6 -2.73 0.00
 10 44 6 -3.40 0.00
 12 44 6 -9.84 0.00
 14 44 6 -7.61 0.00
 16 44 6 -2.87 0.00
 7 45 6 7.92 0.00
 9 45 6 1.82 0.00
 11 45 6 4.26 0.00
 13 45 6 -9.55 0.00
 15 45 6 8.21 0.00
 4 46 6 -9.51 0.00
 6 46 6 2.36 0.00
 8 46 6 3.37 0.00
 10 46 6 0.28 0.00
 12 46 6 5.77 0.00
 14 46 6 -3.53 0.00
 1 47 6 -3.78 0.00
 3 47 6 1.24 0.00
 5 47 6 4.69 0.00
 7 47 6 7.44 0.00
 9 47 6 6.09 0.00
 11 47 6 -2.46 0.00
 13 47 6 6.20 0.00
 0 48 6 7.32 0.00
 2 48 6 4.87 0.00
 4 48 6 7.19 0.00
 6 48 6 4.05 0.00
 8 48 6 1.61 0.00
 10 48 6 0.14 0.00
 12 48 6 -1.39 0.00
 31 1 7 -3.23 0.00
 30 2 7 -8.81 0.00
 31 3 7 6.24 0.00
 30 4 7 -3.55 0.00
 29 5 7 -3.16 0.00
 31 5 7 0.29 0.00
 30 6 7 10.32 0.00
 29 7 7 7.07 0.00
 31 7 7 13.25 0.00
 30 8 7 8.17 0.00
 29 9 7 0.59 0.00
 31 9 7 -10.06 0.00
 30 10 7 -8.90 0.00
 29 11 7 -5.48 0.00
 31 11 7 9.61 0.00
 28 12 7 2.02 0.00
 30 12 7 2.48 0.00
 29 13 7 14.56 0.00
 31 13 7 -4.08 0.00
 28 14 7 8.23 0.00
 30 14 7 -0.49 0.00
 27 15 7 3.60 0.00
 29 15 7 -0.77 0.00
 31 15 7 2.71 0.00
 28 16 7 -4.37 0.00
 30 16 7 -7.06 0.00
 27 17 7 8.77 0.00
 29 17 7 4.81 0.00
 31 17 7 1.61 0.00
 28 18 7 -18.26 0.00
 30 18 7 -2.96 0.00
 27 19 7 3.25 0.00
 29 19 7 0.01 0.00
 26 20 7 -7.16 0.00
 28 20 7 -12.60 0.00
 30 20 7 -14.96 0.00
 27 21 7 -6.10 0.00
 29 21 7 2.50 0.00
 26 22 7 -15.04 0.00
 28 22 7 -13.80 0.00
 25 23 7 -8.55 0.00
 27 23 7 10.50 0.00
 29 23 7 4.61 0.00
 26 24 7 -4.47 0.00
 28 24 7 -0.48 0.00
 25 25 7 9.98 0.00
 27 25 7 -0.71 0.00
 24 26 7 -21.13 0.00
 26 26 7 -3.42 0.00
 28 26 7 -1.75 0.00
 25 27 7 -9.85 0.00
 27 27 7 4.60 0.00
 24 28 7 -13.10 0.00
 26 28 7 -11.58 0.00
 23 29 7 -7.05 0.00
 25 29 7 -3.44 0.00
 27 29 7 -4.01 0.00
 22 30 7 6.09 0.00
 24 30 7 -5.16 0.00
 26 30 7 -0.48 0.00
 23 31 7 -5.02 0.00
 25 31 7 0.64 0.00
 22 32 7 -6.76 0.00
 24 32 7 -0.62 0.00
 21 33 7 0.47 0.00
 23 33 7 7.73 0.00
 25 33 7 -1.88 0.00
 20 34 7 2.96 0.00
 22 34 7 1.43 0.00
 24 34 7 0.39 0.00
 19 35 7 11.18 0.00
 21 35 7 9.77 0.00
 23 35 7 3.40 0.00
 18 36 7 16.66 0.00
 20 36 7 9.58 0.00
 22 36 7 4.84 0.00
 17 37 7 2.24 0.00
 19 37 7 5.70 0.00
 21 37 7 3.39 0.00
 18 38 7 11.86 0.00
 20 38 7 4.81 0.00
 22 38 7 -1.81 0.00
 17 39 7 8.15 0.00
 19 39 7 11.71 0.00
 21 39 7 5.36 0.00
 14 40 7 -8.72 0.00
 16 40 7 5.67 0.00
 18 40 7 1.72 0.00
 20 40 7 -0.96 0.00
 13 41 7 -14.10 0.00
 15 41 7 -10.86 0.00
 17 41 7 -1.93 0.00
 19 41 7 2.99 0.00
 10 42 7 -2.64 0.00
 12 42 7 10.20 0.00
 14 42 7 16.07 0.00
 16 42 7 -0.44 0.00
 18 42 7 -1.04 0.00
 9 43 7 -13.10 0.00
 11 43 7 -4.51 0.00
 13 43 7 3.77 0.00
 15 43 7 -4.74 0.00
 17 43 7 2.44 0.00
 8 44 7 9.29 0.00
 10 44 7 11.70 0.00
 12 44 7 -2.04 0.00
 14 44 7 6.21 0.00
 16 44 7 9.24 0.00
 5 45 7 -11.55 0.00
 7 45 7 -2.32 0.00
 9 45 7 19.11 0.00
 11 45 7 -6.26 0.00
 13 45 7 -8.74 0.00
 15 45 7 3.07 0.00
 0 46 7 -17.22 0.00
 2 46 7 -14.20 0.00
 4 46 7 -9.16 0.00
 6 46 7 -4.32 0.00
 8 46 7 -2.72 0.00
 10 46 7 -5.20 0.00
 12 46 7 -7.61 0.00
 14 46 7 -6.98 0.00
 1 47 7 9.78 0.00
 3 47 7 5.74 0.00
 5 47 7 4.08 0.00
 7 47 7 -2.59 0.00
 9 47 7 -5.85 0.00
 11 47 7 0.68 0.00
 13 47 7 -6.20 0.00
 0 48 7 -4.15 0.00
 2 48 7 -0.91 0.00
 4 48 7 -3.01 0.00
 6 48 7 -3.75 0.00
 8 48 7 -2.14 0.00
 10 48 7 1.01 0.00
 30 0 8 9.19 0.00
 29 1 8 19.66 0.00
 31 1 8 0.68 0.00
 30 2 8 10.98 0.00
 29 3 8 -4.31 0.00
 31 3 8 8.54 0.00
 30 4 8 8.55 0.00
 29 5 8 8.87 0.00
 31 5 8 6.98 0.00
 30 6 8 -4.77 0.00
 29 7 8 9.40 0.00
 31 7 8 -1.44 0.00
 28 8 8 -8.34 0.00
 30 8 8 -2.35 0.00
 29 9 8 -5.38 0.00
 31 9 8 4.72 0.00
 28 10 8 10.26 0.00
 30 10 8 7.18 0.00
 29 11 8 16.18 0.00
 31 11 8 7.48 0.00
 28 12 8 13.13 0.00
 30 12 8 4.46 0.00
 29 13 8 13.43 0.00
 31 13 8 0.78 0.00
 28 14 8 -6.49 0.00
 30 14 8 -3.41 0.00
 27 15 8 13.20 0.00
 29 15 8 1.81 0.00
 31 15 8 -0.34 0.00
 28 16 8 3.25 0.00
 30 16 8 -4.71 0.00
 27 17 8 7.80 0.00
 29 17 8 10.55 0.00
 26 18 8 7.95 0.00
 28 18 8 4.42 0.00
 30 18 8 -4.32 0.00
 27 19 8 22.99 0.00
 29 19 8 12.79 0.00
 26 20 8 8.93 0.00
 28 20 8 0.39 0.00
 25 21 8 22.05 0.00
 27 21 8 5.18 0.00
 29 21 8 3.35 0.00
 26 22 8 -2.05 0.00
 28 22 8 15.49 0.00
 25 23 8 14.16 0.00
 27 23 8 10.90 0.00
 24 24 8 0.54 0.00
 26 24 8 7.72 0.00
 28 24 8 -0.83 0.00
 23 25 8 -14.22 0.00
 25 25 8 -11.76 0.00
 27 25 8 -0.19 0.00
 24 26 8 -7.28 0.00
 26 26 8 0.10 0.00
 23 27 8 -3.74 0.00
 25 27 8 -6.70 0.00
 27 27 8 -10.07 0.00
 22 28 8 -15.51 0.00
 24 28 8 -7.99 0.00
 26 28 8 -2.54 0.00
 23 29 8 6.59 0.00
 25 29 8 0.96 0.00
 22 30 8 3.61 0.00
 24 30 8 -6.35 0.00
 26 30 8 -1.18 0.00
 21 31 8 5.22 0.00
 23 31 8 -11.63 0.00
 25 31 8 -2.86 0.00
 20 32 8 0.79 0.00
 22 32 8 -6.64 0.00
 24 32 8 1.99 0.00
 19 33 8 -2.70 0.00
 21 33 8 7.87 0.00
 23 33 8 5.95 0.00
 18 34 8 7.99 0.00
 20 34 8 6.38 0.00
 22 34 8 0.00 0.00
 19 35 8 6.01 0.00
 21 35 8 6.21 0.00
 23 35 8 1.80 0.00
 18 36 8 11.54 0.00
 20 36 8 8.46 0.00
 22 36 8 2.88 0.00
 17 37 8 5.25 0.00
 19 37 8 -0.58 0.00
 21 37 8 -2.77 0.00
 16 38 8 -6.58 0.00
 18 38 8 2.06 0.00
 20 38 8 3.64 0.00
 15 39 8 -6.40 0.00
 17 39 8 -6.80 0.00
 19 39 8 -2.49 0.00
 10 40 8 -4.46 0.00
 12 40 8 -14.84 0.00
 14 40 8 -12.86 0.00
 16 40 8 6.80 0.00
 18 40 8 1.25 0.00
 9 41 8 2.31 0.00
 11 41 8 8.48 0.00
 13 41 8 12.83 0.00
 15 41 8 7.45 0.00
 17 41 8 -2.05 0.00
 8 42 8 -5.81 0.00
 10 42 8 -0.02 0.00
 12 42 8 3.43 0.00
 14 42 8 6.41 0.00
 16 42 8 -3.53 0.00
 7 43 8 -6.47 0.00
 9 43 8 5.51 0.00
 11 43 8 4.21 0.00
 13 43 8 8.44 0.00
 15 43 8 1.28 0.00
 6 44 8 -12.26 0.00
 8 44 8 -3.07 0.00
 10 44 8 -12.71 0.00
 12 44 8 -1.49 0.00
 14 44 8 -7.43 0.00
 1 45 8 -6.13 0.00
 3 45 8 12.50 0.00
 5 45 8 0.50 0.00
 7 45 8 5.84 0.00
 9 45 8 -7.41 0.00
 11 45 8 1.96 0.00
 13 45 8 2.83 0.00
 0 46 8 -12.34 0.00
 2 46 8 -15.73 0.00
 4 46 8 0.80 0.00
 6 46 8 0.87 0.00
 8 46 8 -16.14 0.00
 10 46 8 -2.20 0.00
 12 46 8 -5.26 0.00
 1 47 8 15.84 0.00
 3 47 8 7.55 0.00
 5 47 8 9.96 0.00
 7 47 8 2.96 0.00
 9 47 8 5.38 0.00
 11 47 8 3.91 0.00
 0 48 8 -18.77 0.00
 2 48 8 -5.44 0.00
 4 48 8 -6.52 0.00
 6 48 8 -5.65 0.00
 8 48 8 3.64 0.00
 29 1 9 -14.73 0.00
 31 1 9 9.07 0.00
 28 2 9 0.89 0.00
 30 2 9 6.36 0.00
 29 3 9 14.64 0.00
 31 3 9 9.29 0.00
 28 4 9 0.42 0.00
 30 4 9 10.50 0.00
 29 5 9 -3.75 0.00
 31 5 9 -7.06 0.00
 28 6 9 12.39 0.00
 30 6 9 -7.90 0.00
 29 7 9 -4.09 0.00
 31 7 9 3.57 0.00
 28 8 9 -1.08 0.00
 30 8 9 0.86 0.00
 29 9 9 3.58 0.00
 31 9 9 0.62 0.00
 28 10 9 -4.01 0.00
 30 10 9 6.11 0.00
 27 11 9 -11.48 0.00
 29 11 9 0.84 0.00
 31 11 9 1.69 0.00
 28 12 9 2.44 0.00
 30 12 9 2.89 0.00
 27 13 9 -9.27 0.00
 29 13 9 -2.07 0.00
 28 14 9 -2.45 0.00
 30 14 9 2.31 0.00
 27 15 9 -0.15 0.00
 29 15 9 2.92 0.00
 26 16 9 -5.07 0.00
 28 16 9 7.27 0.00
 30 16 9 -4.96 0.00
 27 17 9 -4.79 0.00
 29 17 9 -1.21 0.00
 26 18 9 10.78 0.00
 28 18 9 -2.66 0.00
 25 19 9 4.98 0.00
 27 19 9 2.91 0.00
 29 19 9 -0.69 0.00
 26 20 9 1.55 0.00
 28 20 9 4.06 0.00
 25 21 9 11.97 0.00
 27 21 9 8.16 0.00
 22 22 9 19.48 0.00
 24 22 9 5.18 0.00
 26 22 9 9.57 0.00
 28 22 9 4.21 0.00
 25 23 9 0.80 0.00
 27 23 9 -3.21 0.00
 22 24 9 -18.54 0.00
 24 24 9 -6.80 0.00
 26 24 9 -2.16 0.00
 23 25 9 -3.41 0.00
 25 25 9 -6.10 0.00
 27 25 9 -0.82 0.00
 22 26 9 7.87 0.00
 24 26 9 0.30 0.00
 26 26 9 2.31 0.00
 21 27 9 9.35 0.00
 23 27 9 -1.05 0.00
 25 27 9 -1.51 0.00
 22 28 9 15.11 0.00
 24 28 9 9.53 0.00
 26 28 9 1.38 0.00
 21 29 9 -4.29 0.00
 23 29 9 6.25 0.00
 25 29 9 -1.82 0.00
 20 30 9 2.69 0.00
 22 30 9 6.76 0.00
 24 30 9 0.36 0.00
 19 31 9 0.66 0.00
 21 31 9 -7.05 0.00
 23 31 9 -4.73 0.00
 18 32 9 -1.07 0.00
 20 32 9 5.44 0.00
 22 32 9 1.16 0.00
 24 32 9 5.57 0.00
 19 33 9 9.78 0.00
 21 33 9 3.32 0.00
 23 33 9 -7.17 0.00
 18 34 9 6.83 0.00
 20 34 9 3.95 0.00
 22 34 9 0.86 0.00
 17 35 9 -10.21 0.00
 19 35 9 5.86 0.00
 21 35 9 -0.22 0.00
 16 36 9 3.04 0.00
 18 36 9 2.64 0.00
 20 36 9 -2.83 0.00
 15 37 9 -8.38 0.00
 17 37 9 -5.27 0.00
 19 37 9 -7.94 0.00
 21 37 9 -6.50 0.00
 10 38 9 -6.60 0.00
 12 38 9 -0.60 0.00
 14 38 9 -0.98 0.00
 16 38 9 -4.40 0.00
 18 38 9 -6.41 0.00
 20 38 9 3.55 0.00
 9 39 9 0.47 0.00
 11 39 9 1.93 0.00
 13 39 9 3.33 0.00
 15 39 9 1.46 0.00
 17 39 9 12.71 0.00
 19 39 9 5.29 0.00
 8 40 9 8.71 0.00
 10 40 9 -2.64 0.00
 12 40 9 -11.79 0.00
 14 40 9 -0.15 0.00
 16 40 9 0.28 0.00
 18 40 9 5.10 0.00
 7 41 9 19.91 0.00
 9 41 9 14.84 0.00
 11 41 9 -6.14 0.00
 13 41 9 0.54 0.00
 15 41 9 1.29 0.00
 17 41 9 -5.29 0.00
 6 42 9 -11.77 0.00
 8 42 9 -11.92 0.00
 10 42 9 -4.55 0.00
 12 42 9 -5.74 0.00
 14 42 9 -5.20 0.00
 16 42 9 -0.37 0.00
 5 43 9 6.74 0.00
 7 43 9 -7.99 0.00
 9 43 9 1.73 0.00
 11 43 9 -3.67 0.00
 13 43 9 -11.42 0.00
 15 43 9 1.67 0.00
 0 44 9 -12.75 0.00
 2 44 9 -4.30 0.00
 4 44 9 1.46 0.00
 6 44 9 -3.36 0.00
 8 44 9 -3.40 0.00
 10 44 9 -4.55 0.00
 12 44 9 0.50 0.00
 14 44 9 -2.69 0.00
 1 45 9 -8.85 0.00
 3 45 9 -5.56 0.00
 5 45 9 15.47 0.00
 7 45 9 14.75 0.00
 9 45 9 -1.87 0.00
 11 45 9 4.50 0.00
 0 46 9 5.38 0.00
 2 46 9 -0.52 0.00
 4 46 9 2.19 0.00
 6 46 9 -1.24 0.00
 8 46 9 -9.33 0.00
 10 46 9 -4.24 0.00
 1 47 9 -1.11 0.00
 3 47 9 4.35 0.00
 5 47 9 -0.14 0.00
 7 47 9 1.85 0.00
 9 47 9 3.34 0.00
 0 48 9 -9.71 0.00
 2 48 9 -8.55 0.00
 4 48 9 -4.41 0.00
 6 48 9 -4.17 0.00
 18 0 10 -53.98 0.00
 28 0 10 -0.48 0.00
 30 0 10 -3.91 0.00
 29 1 10 -11.48 0.00
 31 1 10 -2.08 0.00
 28 2 10 9.55 0.00
 30 2 10 -2.82 0.00
 29 3 10 8.91 0.00
 31 3 10 -8.22 0.00
 28 4 10 -18.13 0.00
 30 4 10 -5.74 0.00
 27 5 10 20.34 0.00
 29 5 10 5.73 0.00
 28 6 10 3.62 0.00
 30 6 10 0.42 0.00
 27 7 10 8.02 0.00
 29 7 10 6.20 0.00
 28 8 10 5.79 0.00
 30 8 10 -5.85 0.00
 27 9 10 4.71 0.00
 29 9 10 10.14 0.00
 28 10 10 -2.46 0.00
 30 10 10 2.04 0.00
 27 11 10 9.00 0.00
 29 11 10 -0.80 0.00
 26 12 10 3.70 0.00
 28 12 10 -3.87 0.00
 30 12 10 -1.16 0.00
 27 13 10 -6.24 0.00
 29 13 10 -3.73 0.00
 26 14 10 -0.26 0.00
 28 14 10 5.04 0.00
 27 15 10 -13.90 0.00
 29 15 10 0.12 0.00
 26 16 10 0.62 0.00
 28 16 10 3.95 0.00
 25 17 10 -30.04 0.00
 27 17 10 -2.18 0.00
 29 17 10 -8.33 0.00
 26 18 10 -11.69 0.00
 28 18 10 6.90 0.00
 25 19 10 27.35 0.00
 27 19 10 -6.74 0.00
 24 20 10 -13.02 0.00
 26 20 10 4.92 0.00
 28 20 10 -8.75 0.00
 25 21 10 -9.18 0.00
 27 21 10 9.04 0.00
 22 22 10 -11.06 0.00
 24 22 10 2.22 0.00
 26 22 10 -8.07 0.00
 23 23 10 -5.80 0.00
 25 23 10 -2.96 0.00
 27 23 10 -2.05 0.00
 22 24 10 3.56 0.00
 24 24 10 1.78 0.00
 26 24 10 7.93 0.00
 21 25 10 -6.29 0.00
 23 25 10 -0.07 0.00
 25 25 10 15.25 0.00
 20 26 10 -3.22 0.00
 22 26 10 6.22 0.00
 24 26 10 9.06 0.00
 26 26 10 -2.52 0.00
 19 27 10 2.62 0.00
 21 27 10 15.09 0.00
 23 27 10 8.50 0.00
 25 27 10 0.97 0.00
 20 28 10 -11.80 0.00
 22 28 10 -6.52 0.00
 24 28 10 2.33 0.00
 19 29 10 -9.87 0.00
 21 29 10 -0.37 0.00
 23 29 10 2.59 0.00
 18 30 10 -7.26 0.00
 20 30 10 -3.71 0.00
 22 30 10 2.10 0.00
 24 30 10 1.44 0.00
 17 31 10 -18.99 0.00
 19 31 10 -18.65 0.00
 21 31 10 3.61 0.00
 23 31 10 -2.89 0.00
 18 32 10 -3.90 0.00
 20 32 10 -3.76 0.00
 22 32 10 0.77 0.00
 17 33 10 0.18 0.00
 19 33 10 2.20 0.00
 21 33 10 -9.85 0.00
 16 34 10 -15.91 0.00
 18 34 10 -13.38 0.00
 20 34 10 -7.03 0.00
 15 35 10 0.15 0.00
 17 35 10 0.14 0.00
 19 35 10 -4.86 0.00
 21 35 10 -4.98 0.00
 12 36 10 23.16 0.00
 14 36 10 23.70 0.00
 16 36 10 17.80 0.00
 18 36 10 -1.56 0.00
 20 36 10 -4.43 0.00
 11 37 10 14.75 0.00
 13 37 10 4.64 0.00
 15 37 10 5.82 0.00
 17 37 10 -5.28 0.00
 19 37 10 -1.09 0.00
 10 38 10 10.86 0.00
 12 38 10 10.58 0.00
 14 38 10 11.82 0.00
 16 38 10 10.19 0.00
 18 38 10 7.19 0.00
 9 39 10 5.92 0.00
 11 39 10 -2.59 0.00
 13 39 10 8.99 0.00
 15 39 10 0.30 0.00
 17 39 10 3.22 0.00
 6 40 10 -7.23 0.00
 8 40 10 -6.28 0.00
 10 40 10 -6.86 0.00
 12 40 10 7.74 0.00
 14 40 10 5.79 0.00
 16 40 10 -6.77 0.00
 5 41 10 -7.00 0.00
 7 41 10 -2.66 0.00
 9 41 10 0.46 0.00
 11 41 10 8.95 0.00
 13 41 10 6.93 0.00
 15 41 10 3.11 0.00
 0 42 10 -7.74 0.00
 2 42 10 6.60 0.00
 4 42 10 11.34 0.00
 6 42 10 7.59 0.00
 8 42 10 3.17 0.00
 10 42 10 2.57 0.00
 12 42 10 12.35 0.00
 14 42 10 6.26 0.00
 1 43 10 -8.93 0.00
 3 43 10 -3.05 0.00
 5 43 10 -11.15 0.00
 7 43 10 4.23 0.00
 9 43 10 1.22 0.00
 11 43 10 -1.46 0.00
 13 43 10 -1.80 0.00
 0 44 10 8.58 0.00
 2 44 10 9.47 0.00
 4 44 10 8.66 0.00
 6 44 10 6.88 0.00
 8 44 10 10.75 0.00
 10 44 10 4.84 0.00
 12 44 10 -3.64 0.00
 1 45 10 -1.57 0.00
 3 45 10 -7.25 0.00
 5 45 10 -0.14 0.00
 7 45 10 -4.15 0.00
 9 45 10 -3.91 0.00
 0 46 10 13.26 0.00
 2 46 10 10.68 0.00
 4 46 10 0.43 0.00
 6 46 10 2.04 0.00
 8 46 10 -1.22 0.00
 1 47 10 1.42 0.00
 3 47 10 3.07 0.00
 5 47 10 6.08 0.00
 0 48 10 7.17 0.00
 27 1 11 16.24 0.00
 29 1 11 1.95 0.00
 28 2 11 9.01 0.00
 30 2 11 -9.26 0.00
 27 3 11 8.03 0.00
 29 3 11 7.81 0.00
 28 4 11 5.98 0.00
 30 4 11 11.94 0.00
 27 5 11 6.41 0.00
 29 5 11 3.19 0.00
 26 6 11 -12.33 0.00
 28 6 11 -4.32 0.00
 27 7 11 4.05 0.00
 29 7 11 0.57 0.00
 26 8 11 8.83 0.00
 28 8 11 3.92 0.00
 27 9 11 0.95 0.00
 29 9 11 8.99 0.00
 26 10 11 2.96 0.00
 28 10 11 9.06 0.00
 27 11 11 16.52 0.00
 29 11 11 -3.44 0.00
 26 12 11 8.94 0.00
 28 12 11 3.23 0.00
 25 13 11 18.35 0.00
 27 13 11 3.03 0.00
 29 13 11 4.49 0.00
 26 14 11 -5.56 0.00
 28 14 11 0.73 0.00
 25 15 11 13.41 0.00
 27 15 11 10.63 0.00
 24 16 11 -16.24 0.00
 26 16 11 0.15 0.00
 28 16 11 -2.99 0.00
 25 17 11 12.75 0.00
 27 17 11 4.02 0.00
 24 18 11 15.17 0.00
 26 18 11 1.14 0.00
 23 19 11 12.18 0.00
 25 19 11 -9.08 0.00
 27 19 11 -0.90 0.00
 22 20 11 -3.62 0.00
 24 20 11 -7.34 0.00
 26 20 11 -9.86 0.00
 23 21 11 7.38 0.00
 25 21 11 -0.48 0.00
 27 21 11 -0.20 0.00
 22 22 11 -9.72 0.00
 24 22 11 -10.70 0.00
 26 22 11 -5.01 0.00
 21 23 11 21.01 0.00
 23 23 11 -4.29 0.00
 25 23 11 7.81 0.00
 20 24 11 8.39 0.00
 22 24 11 1.36 0.00
 24 24 11 1.56 0.00
 21 25 11 -11.83 0.00
 23 25 11 9.47 0.00
 25 25 11 -1.89 0.00
 20 26 11 -1.60 0.00
 22 26 11 12.09 0.00
 24 26 11 8.14 0.00
 19 27 11 -3.70 0.00
 21 27 11 -18.50 0.00
 23 27 11 -11.45 0.00
 18 28 11 0.41 0.00
 20 28 11 -5.37 0.00
 22 28 11 -15.21 0.00
 24 28 11 0.89 0.00
 17 29 11 13.54 0.00
 19 29 11 4.87 0.00
 21 29 11 6.55 0.00
 23 29 11 0.99 0.00
 18 30 11 -1.96 0.00
 20 30 11 -9.05 0.00
 22 30 11 5.61 0.00
 17 31 11 -11.19 0.00
 19 31 11 5.57 0.00
 21 31 11 -0.74 0.00
 16 32 11 -1.85 0.00
 18 32 11 -2.83 0.00
 20 32 11 4.47 0.00
 22 32 11 2.79 0.00
 15 33 11 0.67 0.00
 17 33 11 -2.78 0.00
 19 33 11 -15.74 0.00
 21 33 11 5.84 0.00
 14 34 11 -0.92 0.00
 16 34 11 1.48 0.00
 18 34 11 -9.81 0.00
 20 34 11 2.15 0.00
 13 35 11 13.21 0.00
 15 35 11 4.53 0.00
 17 35 11 12.45 0.00
 19 35 11 6.46 0.00
 10 36 11 5.29 0.00
 12 36 11 -2.33 0.00
 14 36 11 1.64 0.00
 16 36 11 -5.15 0.00
 18 36 11 -0.68 0.00
 9 37 11 -0.73 0.00
 11 37 11 -15.75 0.00
 13 37 11 -8.38 0.00
 15 37 11 -2.39 0.00
 17 37 11 -7.79 0.00
 8 38 11 -2.59 0.00
 10 38 11 -4.06 0.00
 12 38 11 -0.31 0.00
 14 38 11 0.68 0.00
 16 38 11 -5.55 0.00
 5 39 11 6.60 0.00
 7 39 11 -2.13 0.00
 9 39 11 -4.89 0.00
 11 39 11 2.40 0.00
 13 39 11 -4.57 0.00
 15 39 11 5.35 0.00
 0 40 11 1.44 0.00
 2 40 11 -1.35 0.00
 4 40 11 0.17 0.00
 6 40 11 6.20 0.00
 8 40 11 -5.72 0.00
 10 40 11 3.11 0.00
 12 40 11 5.15 0.00
 14 40 11 -7.73 0.00
 1 41 11 -9.63 0.00
 3 41 11 -9.78 0.00
 5 41 11 17.23 0.00
 7 41 11 3.67 0.00
 9 41 11 7.06 0.00
 11 41 11 9.97 0.00
 13 41 11 9.65 0.00
 0 42 11 -13.33 0.00
 2 42 11 -8.32 0.00
 4 42 11 -2.16 0.00
 6 42 11 -12.38 0.00
 8 42 11 -5.61 0.00
 10 42 11 -8.09 0.00
 12 42 11 -7.05 0.00
 1 43 11 -4.13 0.00
 3 43 11 5.89 0.00
 5 43 11 -11.02 0.00
 7 43 11 -2.28 0.00
 9 43 11 -9.10 0.00
 11 43 11 -3.91 0.00
 0 44 11 -3.65 0.00
 2 44 11 -7.49 0.00
 4 44 11 -2.97 0.00
 6 44 11 2.14 0.00
 8 44 11 -0.40 0.00
 10 44 11 -0.52 0.00
 1 45 11 -13.15 0.00
 3 45 11 -3.51 0.00
 5 45 11 -6.90 0.00
 7 45 11 -3.49 0.00
 0 46 11 -3.15 0.00
 2 46 11 3.40 0.00
 4 46 11 -2.90 0.00
 26 0 12 1.16 0.00
 28 0 12 -8.84 0.00
 25 1 12 -1.87 0.00
 27 1 12 -12.92 0.00
 29 1 12 10.19 0.00
 26 2 12 11.36 0.00
 28 2 12 6.16 0.00
 25 3 12 -13.08 0.00
 27 3 12 20.64 0.00
 29 3 12 -5.89 0.00
 26 4 12 -9.81 0.00
 28 4 12 2.76 0.00
 25 5 12 19.23 0.00
 27 5 12 -6.47 0.00
 29 5 12 -0.66 0.00
 26 6 12 15.90 0.00
 28 6 12 2.37 0.00
 25 7 12 14.46 0.00
 27 7 12 6.29 0.00
 26 8 12 5.59 0.00
 28 8 12 0.80 0.00
 25 9 12 13.44 0.00
 27 9 12 9.55 0.00
 26 10 12 2.78 0.00
 28 10 12 6.76 0.00
 25 11 12 9.64 0.00
 27 11 12 -1.85 0.00
 24 12 12 -6.26 0.00
 26 12 12 2.87 0.00
 28 12 12 1.08 0.00
 25 13 12 -34.88 0.00
 27 13 12 0.83 0.00
 24 14 12 -6.63 0.00
 26 14 12 -3.94 0.00
 25 15 12 3.01 0.00
 27 15 12 -2.76 0.00
 24 16 12 4.22 0.00
 26 16 12 -0.83 0.00
 23 17 12 -5.99 0.00
 25 17 12 7.92 0.00
 27 17 12 0.64 0.00
 22 18 12 3.71 0.00
 24 18 12 1.86 0.00
 26 18 12 1.80 0.00
 23 19 12 -0.25 0.00
 25 19 12 -13.43 0.00
 22 20 12 14.53 0.00
 24 20 12 9.03 0.00
 26 20 12 14.90 0.00
 21 21 12 -5.38 0.00
 23 21 12 -12.77 0.00
 25 21 12 -0.86 0.00
 20 22 12 10.83 0.00
 22 22 12 7.43 0.00
 24 22 12 8.60 0.00
 21 23 12 5.08 0.00
 23 23 12 -3.60 0.00
 25 23 12 -10.30 0.00
 20 24 12 3.83 0.00
 22 24 12 4.45 0.00
 24 24 12 1.29 0.00
 19 25 12 7.11 0.00
 21 25 12 15.30 0.00
 23 25 12 2.58 0.00
 18 26 12 -0.31 0.00
 20 26 12 8.53 0.00
 22 26 12 -3.83 0.00
 19 27 12 0.13 0.00
 21 27 12 -5.54 0.00
 23 27 12 -6.46 0.00
 18 28 12 8.06 0.00
 20 28 12 9.00 0.00
 22 28 12 4.57 0.00
 17 29 12 3.22 0.00
 19 29 12 0.64 0.00
 21 29 12 -6.35 0.00
 16 30 12 -8.56 0.00
 18 30 12 9.74 0.00
 20 30 12 -1.95 0.00
 15 31 12 -13.01 0.00
 17 31 12 8.56 0.00
 19 31 12 2.59 0.00
 21 31 12 -5.67 0.00
 14 32 12 -0.73 0.00
 16 32 12 10.78 0.00
 18 32 12 -1.00 0.00
 20 32 12 -1.84 0.00
 13 33 12 -3.89 0.00
 15 33 12 5.42 0.00
 17 33 12 -0.55 0.00
 19 33 12 0.82 0.00
 12 34 12 -10.71 0.00
 14 34 12 -0.94 0.00
 16 34 12 1.86 0.00
 18 34 12 5.96 0.00
 11 35 12 -4.07 0.00
 13 35 12 -9.85 0.00
 15 35 12 2.51 0.00
 17 35 12 -3.02 0.00
 8 36 12 -1.26 0.00
 10 36 12 -10.29 0.00
 12 36 12 -6.25 0.00
 14 36 12 -9.56 0.00
 16 36 12 -1.77 0.00
 7 37 12 1.49 0.00
 9 37 12 0.32 0.00
 11 37 12 -11.59 0.00
 13 37 12 4.71 0.00
 15 37 12 -4.60 0.00
 0 38 12 -1.74 0.00
 4 38 12 12.82 0.00
 6 38 12 9.48 0.00
 8 38 12 5.53 0.00
 10 38 12 1.32 0.00
 12 38 12 0.53 0.00
 14 38 12 4.39 0.00
 1 39 12 6.01 0.00
 3 39 12 -1.37 0.00
 5 39 12 5.89 0.00
 7 39 12 7.29 0.00
 9 39 12 -5.11 0.00
 11 39 12 -1.02 0.00
 13 39 12 -12.20 0.00
 0 40 12 8.01 0.00
 2 40 12 6.53 0.00
 4 40 12 -3.20 0.00
 6 40 12 1.68 0.00
 8 40 12 2.99 0.00
 10 40 12 0.76 0.00
 12 40 12 -4.08 0.00
 1 41 12 -1.75 0.00
 3 41 12 3.62 0.00
 5 41 12 1.66 0.00
 7 41 12 -2.85 0.00
 9 41 12 -5.90 0.00
 11 41 12 -9.54 0.00
 0 42 12 24.08 0.00
 2 42 12 7.86 0.00
 4 42 12 5.98 0.00
 6 42 12 1.03 0.00
 8 42 12 -6.25 0.00
 10 42 12 -6.08 0.00
 1 43 12 7.12 0.00
 3 43 12 5.19 0.00
 5 43 12 14.45 0.00
 7 43 12 4.10 0.00
 9 43 12 1.18 0.00
 0 44 12 -5.75 0.00
 2 44 12 -4.82 0.00
 4 44 12 -3.22 0.00
 6 44 12 1.73 0.00
 1 45 12 3.32 0.00
 3 45 12 4.91 0.00
 25 1 13 -3.93 0.00
 27 1 13 6.98 0.00
 24 2 13 8.71 0.00
 26 2 13 -9.25 0.00
 28 2 13 -10.85 0.00
 25 3 13 4.45 0.00
 27 3 13 -5.56 0.00
 24 4 13 -5.66 0.00
 26 4 13 2.67 0.00
 28 4 13 5.09 0.00
 25 5 13 15.25 0.00
 27 5 13 13.74 0.00
 24 6 13 -1.78 0.00
 26 6 13 6.32 0.00
 25 7 13 0.43 0.00
 27 7 13 1.29 0.00
 24 8 13 9.20 0.00
 26 8 13 3.54 0.00
 23 9 13 -16.72 0.00
 25 9 13 1.06 0.00
 27 9 13 0.25 0.00
 24 10 13 -1.73 0.00
 26 10 13 -0.02 0.00
 23 11 13 -1.85 0.00
 25 11 13 0.50 0.00
 27 11 13 -8.70 0.00
 24 12 13 -6.94 0.00
 26 12 13 -2.09 0.00
 23 13 13 -6.37 0.00
 25 13 13 -6.48 0.00
 22 14 13 13.75 0.00
 24 14 13 8.10 0.00
 26 14 13 9.49 0.00
 23 15 13 -1.60 0.00
 25 15 13 -1.74 0.00
 22 16 13 10.14 0.00
 24 16 13 15.67 0.00
 26 16 13 -0.76 0.00
 23 17 13 5.34 0.00
 25 17 13 -12.67 0.00
 22 18 13 -0.56 0.00
 24 18 13 8.02 0.00
 21 19 13 6.82 0.00
 23 19 13 0.52 0.00
 25 19 13 7.46 0.00
 20 20 13 5.08 0.00
 22 20 13 8.18 0.00
 24 20 13 -5.12 0.00
 21 21 13 2.71 0.00
 23 21 13 -1.08 0.00
 20 22 13 -1.53 0.00
 22 22 13 11.95 0.00
 24 22 13 7.79 0.00
 19 23 13 -2.00 0.00
 21 23 13 -7.01 0.00
 23 23 13 8.21 0.00
 18 24 13 2.49 0.00
 20 24 13 8.65 0.00
 22 24 13 5.42 0.00
 17 25 13 -9.54 0.00
 19 25 13 0.80 0.00
 21 25 13 2.54 0.00
 23 25 13 -1.60 0.00
 18 26 13 1.03 0.00
 20 26 13 -5.84 0.00
 22 26 13 -1.07 0.00
 17 27 13 -11.77 0.00
 19 27 13 -2.41 0.00
 21 27 13 3.23 0.00
 16 28 13 2.74 0.00
 18 28 13 -3.10 0.00
 20 28 13 2.63 0.00
 15 29 13 -9.84 0.00
 17 29 13 -10.77 0.00
 19 29 13 -2.08 0.00
 21 29 13 2.55 0.00
 14 30 13 -0.94 0.00
 16 30 13 4.13 0.00
 18 30 13 -2.06 0.00
 20 30 13 3.47 0.00
 13 31 13 -12.01 0.00
 15 31 13 -9.21 0.00
 17 31 13 4.52 0.00
 19 31 13 0.61 0.00
 12 32 13 -0.12 0.00
 14 32 13 5.44 0.00
 16 32 13 5.50 0.00
 18 32 13 8.60 0.00
 11 33 13 -15.76 0.00
 13 33 13 -5.54 0.00
 15 33 13 -9.19 0.00
 17 33 13 -3.59 0.00
 10 34 13 0.65 0.00
 12 34 13 -4.19 0.00
 14 34 13 -0.17 0.00
 16 34 13 -3.36 0.00
 7 35 13 5.36 0.00
 9 35 13 3.86 0.00
 11 35 13 0.40 0.00
 13 35 13 -3.68 0.00
 15 35 13 7.72 0.00
 6 36 13 0.24 0.00
 8 36 13 7.87 0.00
 10 36 13 7.18 0.00
 12 36 13 10.07 0.00
 14 36 13 -2.65 0.00
 1 37 13 -7.68 0.00
 3 37 13 -5.92 0.00
 5 37 13 13.09 0.00
 7 37 13 7.54 0.00
 9 37 13 3.28 0.00
 11 37 13 4.38 0.00
 13 37 13 -2.06 0.00
 0 38 13 -9.20 0.00
 2 38 13 -13.14 0.00
 4 38 13 -5.47 0.00
 6 38 13 0.62 0.00
 8 38 13 8.07 0.00
 10 38 13 5.69 0.00
 12 38 13 -2.31 0.00
 1 39 13 4.04 0.00
 3 39 13 11.42 0.00
 5 39 13 -11.48 0.00
 7 39 13 -6.39 0.00
 9 39 13 -5.33 0.00
 11 39 13 -3.64 0.00
 0 40 13 -14.63 0.00
 2 40 13 -8.79 0.00
 4 40 13 -4.38 0.00
 6 40 13 -2.46 0.00
 8 40 13 3.05 0.00
 10 40 13 1.80 0.00
 1 41 13 4.33 0.00
 3 41 13 7.91 0.00
 5 41 13 4.52 0.00
 7 41 13 -0.04 0.00
 9 41 13 2.00 0.00
 0 42 13 -1.59 0.00
 2 42 13 -2.40 0.00
 4 42 13 -2.32 0.00
 6 42 13 4.30 0.00
 1 43 13 6.93 0.00
 3 43 13 -3.50 0.00
 24 0 14 -23.18 0.00
 26 0 14 -1.73 0.00
 23 1 14 3.29 0.00
 25 1 14 -1.96 0.00
 24 2 14 10.56 0.00
 26 2 14 -7.51 0.00
 23 3 14 5.22 0.00
 25 3 14 -1.87 0.00
 24 4 14 -12.25 0.00
 26 4 14 3.13 0.00
 23 5 14 -18.86 0.00
 25 5 14 0.96 0.00
 22 6 14 -9.62 0.00
 24 6 14 -4.24 0.00
 26 6 14 -6.05 0.00
 23 7 14 9.93 0.00
 25 7 14 -4.33 0.00
 22 8 14 -13.29 0.00
 24 8 14 -7.55 0.00
 26 8 14 -4.40 0.00
 23 9 14 4.71 0.00
 25 9 14 -5.47 0.00
 22 10 14 6.03 0.00
 24 10 14 2.73 0.00
 26 10 14 -1.97 0.00
 23 11 14 1.99 0.00
 25 11 14 1.41 0.00
 22 12 14 4.02 0.00
 24 12 14 -2.77 0.00
 21 13 14 -2.36 0.00
 23 13 14 -7.20 0.00
 25 13 14 15.74 0.00
 22 14 14 -13.43 0.00
 24 14 14 0.68 0.00
 21 15 14 14.06 0.00
 23 15 14 8.91 0.00
 25 15 14 0.72 0.00
 20 16 14 7.71 0.00
 22 16 14 -5.13 0.00
 24 16 14 -7.63 0.00
 21 17 14 -5.02 0.00
 23 17 14 7.78 0.00
 20 18 14 -0.71 0.00
 22 18 14 6.87 0.00
 24 18 14 2.07 0.00
 19 19 14 -3.51 0.00
 21 19 14 5.75 0.00
 23 19 14 -7.64 0.00
 20 20 14 -3.67 0.00
 22 20 14 -3.03 0.00
 19 21 14 13.08 0.00
 21 21 14 5.10 0.00
 23 21 14 9.22 0.00
 18 22 14 2.51 0.00
 20 22 14 5.41 0.00
 22 22 14 -6.11 0.00
 17 23 14 4.66 0.00
 19 23 14 -9.85 0.00
 21 23 14 6.77 0.00
 16 24 14 10.57 0.00
 18 24 14 0.11 0.00
 20 24 14 -4.00 0.00
 22 24 14 3.18 0.00
 17 25 14 -2.24 0.00
 19 25 14 -0.16 0.00
 21 25 14 -3.89 0.00
 16 26 14 3.64 0.00
 18 26 14 5.89 0.00
 20 26 14 -2.84 0.00
 15 27 14 -1.42 0.00
 17 27 14 3.52 0.00
 19 27 14 0.03 0.00
 14 28 14 6.20 0.00
 16 28 14 6.27 0.00
 18 28 14 -0.30 0.00
 13 29 14 -5.45 0.00
 15 29 14 -3.94 0.00
 17 29 14 -7.97 0.00
 19 29 14 0.80 0.00
 12 30 14 -2.33 0.00
 14 30 14 0.56 0.00
 16 30 14 -4.03 0.00
 18 30 14 1.67 0.00
 11 31 14 -3.70 0.00
 13 31 14 12.06 0.00
 15 31 14 5.34 0.00
 17 31 14 -0.07 0.00
 10 32 14 -3.61 0.00
 12 32 14 4.34 0.00
 14 32 14 -2.66 0.00
 16 32 14 0.46 0.00
 7 33 14 5.91 0.00
 9 33 14 2.70 0.00
 11 33 14 4.86 0.00
 13 33 14 -4.04 0.00
 15 33 14 1.36 0.00
 4 34 14 -1.39 0.00
 6 34 14 4.68 0.00
 8 34 14 2.07 0.00
 10 34 14 11.31 0.00
 12 34 14 3.85 0.00
 14 34 14 2.88 0.00
 1 35 14 -4.06 0.00
 3 35 14 -5.16 0.00
 5 35 14 0.78 0.00
 7 35 14 -0.29 0.00
 9 35 14 6.93 0.00
 11 35 14 4.21 0.00
 13 35 14 9.20 0.00
 0 36 14 4.32 0.00
 2 36 14 -4.80 0.00
 4 36 14 2.52 0.00
 6 36 14 2.22 0.00
 8 36 14 4.26 0.00
 10 36 14 -3.65 0.00
 12 36 14 -7.56 0.00
 1 37 14 -2.42 0.00
 3 37 14 0.26 0.00
 5 37 14 0.34 0.00
 7 37 14 4.53 0.00
 9 37 14 0.91 0.00
 11 37 14 2.64 0.00
 0 38 14 9.67 0.00
 2 38 14 8.51 0.00
 4 38 14 -0.54 0.00
 6 38 14 -3.03 0.00
 8 38 14 -4.83 0.00
 10 38 14 -4.75 0.00
 1 39 14 3.72 0.00
 3 39 14 1.60 0.00
 5 39 14 0.65 0.00
 7 39 14 -0.30 0.00
 9 39 14 1.71 0.00
 0 40 14 -11.93 0.00
 2 40 14 -8.03 0.00
 4 40 14 -5.12 0.00
 6 40 14 2.17 0.00
 1 41 14 3.39 0.00
 3 41 14 2.91 0.00
 21 1 15 -1.22 0.00
 23 1 15 -3.33 0.00
 25 1 15 7.36 0.00
 22 2 15 9.97 0.00
 24 2 15 1.22 0.00
 21 3 15 -8.50 0.00
 23 3 15 3.72 0.00
 25 3 15 -10.05 0.00
 22 4 15 3.88 0.00
 24 4 15 1.78 0.00
 21 5 15 -4.06 0.00
 23 5 15 -13.12 0.00
 25 5 15 -4.18 0.00
 22 6 15 -10.12 0.00
 24 6 15 5.43 0.00
 21 7 15 2.34 0.00
 23 7 15 -15.87 0.00
 25 7 15 -6.17 0.00
 20 8 15 1.72 0.00
 22 8 15 8.88 0.00
 24 8 15 -10.56 0.00
 21 9 15 -15.09 0.00
 23 9 15 5.89 0.00
 20 10 15 -9.54 0.00
 22 10 15 -1.50 0.00
 24 10 15 0.71 0.00
 21 11 15 3.05 0.00
 23 11 15 3.83 0.00
 20 12 15 -3.70 0.00
 22 12 15 -6.34 0.00
 24 12 15 -0.24 0.00
 19 13 15 -16.93 0.00
 21 13 15 -13.69 0.00
 23 13 15 -2.14 0.00
 20 14 15 -1.17 0.00
 22 14 15 7.44 0.00
 19 15 15 15.71 0.00
 21 15 15 2.75 0.00
 23 15 15 4.02 0.00
 18 16 15 -16.70 0.00
 20 16 15 2.32 0.00
 22 16 15 -14.08 0.00
 19 17 15 -4.56 0.00
 21 17 15 1.04 0.00
 23 17 15 -1.58 0.00
 18 18 15 -9.85 0.00
 20 18 15 -11.90 0.00
 22 18 15 5.56 0.00
 17 19 15 4.01 0.00
 19 19 15 -9.41 0.00
 21 19 15 -9.42 0.00
 18 20 15 11.64 0.00
 20 20 15 1.57 0.00
 22 20 15 -3.41 0.00
 17 21 15 3.12 0.00
 19 21 15 5.23 0.00
 21 21 15 -8.65 0.00
 16 22 15 -8.00 0.00
 18 22 15 -7.48 0.00
 20 22 15 -4.72 0.00
 15 23 15 -4.20 0.00
 17 23 15 2.36 0.00
 19 23 15 -2.01 0.00
 14 24 15 2.92 0.00
 16 24 15 7.10 0.00
 18 24 15 -1.95 0.00
 20 24 15 4.40 0.00
 13 25 15 14.90 0.00
 15 25 15 19.87 0.00
 17 25 15 8.25 0.00
 19 25 15 0.51 0.00
 12 26 15 7.00 0.00
 14 26 15 1.25 0.00
 16 26 15 -1.30 0.00
 18 26 15 0.26 0.00
 11 27 15 5.83 0.00
 13 27 15 13.81 0.00
 15 27 15 14.60 0.00
 17 27 15 11.47 0.00
 10 28 15 4.58 0.00
 12 28 15 -2.98 0.00
 14 28 15 2.49 0.00
 16 28 15 3.49 0.00
 18 28 15 -0.88 0.00
 9 29 15 -9.09 0.00
 11 29 15 3.83 0.00
 13 29 15 -7.85 0.00
 15 29 15 7.02 0.00
 17 29 15 1.79 0.00
 8 30 15 -8.79 0.00
 10 30 15 -0.28 0.00
 12 30 15 7.14 0.00
 14 30 15 7.38 0.00
 16 30 15 2.08 0.00
 5 31 15 -11.85 0.00
 7 31 15 -2.34 0.00
 9 31 15 4.44 0.00
 11 31 15 -11.46 0.00
 13 31 15 14.17 0.00
 15 31 15 6.72 0.00
 0 32 15 0.77 0.00
 2 32 15 5.57 0.00
 4 32 15 -13.13 0.00
 6 32 15 3.07 0.00
 8 32 15 -1.50 0.00
 10 32 15 -5.23 0.00
 12 32 15 -3.23 0.00
 14 32 15 -2.86 0.00
 1 33 15 -15.70 0.00
 3 33 15 -10.89 0.00
 5 33 15 0.16 0.00
 7 33 15 5.35 0.00
 9 33 15 -7.07 0.00
 11 33 15 10.14 0.00
 13 33 15 -5.08 0.00
 0 34 15 -16.80 0.00
 2 34 15 -18.41 0.00
 4 34 15 -0.97 0.00
 6 34 15 -11.76 0.00
 8 34 15 -4.10 0.00
 10 34 15 -5.80 0.00
 12 34 15 1.03 0.00
 1 35 15 1.17 0.00
 3 35 15 -0.04 0.00
 5 35 15 -0.83 0.00
 7 35 15 -7.60 0.00
 9 35 15 -1.72 0.00
 11 35 15 -3.94 0.00
 0 36 15 3.60 0.00
 2 36 15 1.97 0.00
 4 36 15 1.71 0.00
 6 36 15 5.43 0.00
 8 36 15 -0.11 0.00
 10 36 15 -2.12 0.00
 1 37 15 -6.99 0.00
 3 37 15 4.11 0.00
 5 37 15 -2.45 0.00
 7 37 15 -0.95 0.00
 0 38 15 3.13 0.00
 2 38 15 6.83 0.00
 4 38 15 2.45 0.00
 6 38 15 2.11 0.00
 1 39 15 -10.74 0.00
 3 39 15 -15.29 0.00
 18 0 16 19.60 0.00
 20 0 16 -11.49 0.00
 22 0 16 -1.58 0.00
 19 1 16 -14.25 0.00
 21 1 16 2.22 0.00
 23 1 16 0.20 0.00
 18 2 16 -19.17 0.00
 20 2 16 2.72 0.00
 22 2 16 2.84 0.00
 19 3 16 -30.11 0.00
 21 3 16 -9.18 0.00
 23 3 16 -1.67 0.00
 18 4 16 -10.70 0.00
 20 4 16 3.82 0.00
 22 4 16 4.82 0.00
 19 5 16 15.66 0.00
 21 5 16 -4.22 0.00
 23 5 16 12.63 0.00
 18 6 16 14.63 0.00
 20 6 16 7.46 0.00
 22 6 16 8.09 0.00
 19 7 16 1.76 0.00
 21 7 16 11.31 0.00
 23 7 16 -5.58 0.00
 18 8 16 -8.10 0.00
 20 8 16 3.84 0.00
 22 8 16 4.81 0.00
 19 9 16 -4.17 0.00
 21 9 16 -12.34 0.00
 23 9 16 -16.43 0.00
 18 10 16 8.51 0.00
 20 10 16 -4.80 0.00
 22 10 16 -2.02 0.00
 17 11 16 -9.24 0.00
 19 11 16 0.65 0.00
 21 11 16 -13.44 0.00
 18 12 16 -7.00 0.00
 20 12 16 1.82 0.00
 22 12 16 -7.55 0.00
 17 13 16 17.19 0.00
 19 13 16 -8.31 0.00
 21 13 16 1.48 0.00
 18 14 16 15.96 0.00
 20 14 16 4.42 0.00
 22 14 16 4.91 0.00
 17 15 16 -15.44 0.00
 19 15 16 1.00 0.00
 21 15 16 -8.64 0.00
 16 16 16 2.86 0.00
 18 16 16 0.80 0.00
 20 16 16 -5.33 0.00
 15 17 16 21.57 0.00
 17 17 16 19.48 0.00
 19 17 16 5.75 0.00
 21 17 16 6.24 0.00
 16 18 16 13.76 0.00
 18 18 16 9.36 0.00
 20 18 16 6.00 0.00
 15 19 16 -10.63 0.00
 17 19 16 4.17 0.00
 19 19 16 6.87 0.00
 14 20 16 3.11 0.00
 16 20 16 7.76 0.00
 18 20 16 5.35 0.00
 20 20 16 2.87 0.00
 13 21 16 -3.70 0.00
 15 21 16 8.29 0.00
 17 21 16 2.57 0.00
 19 21 16 -5.28 0.00
 12 22 16 -2.10 0.00
 14 22 16 -18.18 0.00
 16 22 16 -5.02 0.00
 18 22 16 -2.65 0.00
 13 23 16 0.42 0.00
 15 23 16 -6.71 0.00
 17 23 16 -2.51 0.00
 12 24 16 -0.22 0.00
 14 24 16 11.79 0.00
 16 24 16 -11.20 0.00
 18 24 16 -0.80 0.00
 11 25 16 7.63 0.00
 13 25 16 -3.33 0.00
 15 25 16 -5.61 0.00
 17 25 16 -8.60 0.00
 8 26 16 -1.46 0.00
 10 26 16 -1.63 0.00
 12 26 16 13.94 0.00
 14 26 16 -6.34 0.00
 16 26 16 3.09 0.00
 7 27 16 9.76 0.00
 9 27 16 17.26 0.00
 11 27 16 2.88 0.00
 13 27 16 8.91 0.00
 15 27 16 1.27 0.00
 4 28 16 -1.23 0.00
 6 28 16 -9.75 0.00
 8 28 16 -10.53 0.00
 10 28 16 -2.92 0.00
 12 28 16 -4.24 0.00
 14 28 16 6.23 0.00
 1 29 16 15.62 0.00
 3 29 16 8.99 0.00
 5 29 16 -4.75 0.00
 7 29 16 -13.67 0.00
 9 29 16 0.18 0.00
 11 29 16 1.48 0.00
 13 29 16 -1.35 0.00
 0 30 16 -18.30 0.00
 2 30 16 -5.45 0.00
 4 30 16 -8.43 0.00
 6 30 16 -3.51 0.00
 8 30 16 -3.03 0.00
 10 30 16 11.68 0.00
 12 30 16 6.35 0.00
 14 30 16 9.72 0.00
 1 31 16 -3.90 0.00
 3 31 16 -8.70 0.00
 5 31 16 -1.92 0.00
 7 31 16 -0.72 0.00
 9 31 16 -2.62 0.00
 11 31 16 -1.39 0.00
 13 31 16 -3.38 0.00
 0 32 16 8.76 0.00
 2 32 16 -3.77 0.00
 4 32 16 6.69 0.00
 6 32 16 -5.42 0.00
 8 32 16 1.03 0.00
 10 32 16 -3.70 0.00
 12 32 16 2.97 0.00
 1 33 16 -2.24 0.00
 3 33 16 4.32 0.00
 5 33 16 2.52 0.00
 7 33 16 -6.54 0.00
 9 33 16 -5.37 0.00
 0 34 16 2.07 0.00
 2 34 16 8.42 0.00
 4 34 16 -14.55 0.00
 6 34 16 -3.73 0.00
 8 34 16 -4.95 0.00
 1 35 16 7.23 0.00
 3 35 16 8.34 0.00
 5 35 16 -0.55 0.00
 7 35 16 2.78 0.00
 0 36 16 -0.63 0.00
 2 36 16 -8.82 0.00
 4 36 16 -0.44 0.00
 1 37 16 7.14 0.00
 15 1 17 5.18 0.00
 17 1 17 -20.20 0.00
 19 1 17 -7.45 0.00
 21 1 17 -1.65 0.00
 16 2 17 -3.88 0.00
 18 2 17 -14.74 0.00
 20 2 17 -13.28 0.00
 22 2 17 -5.11 0.00
 15 3 17 -5.53 0.00
 17 3 17 -4.58 0.00
 19 3 17 -9.23 0.00
 21 3 17 -0.59 0.00
 16 4 17 -2.96 0.00
 18 4 17 -5.92 0.00
 20 4 17 3.70 0.00
 22 4 17 3.53 0.00
 15 5 17 2.74 0.00
 17 5 17 6.65 0.00
 19 5 17 -2.07 0.00
 21 5 17 -1.28 0.00
 16 6 17 9.58 0.00
 18 6 17 -4.24 0.00
 20 6 17 -2.32 0.00
 15 7 17 20.25 0.00
 17 7 17 -11.89 0.00
 19 7 17 0.01 0.00
 21 7 17 0.70 0.00
 16 8 17 -14.45 0.00
 18 8 17 -8.93 0.00
 20 8 17 -10.95 0.00
 15 9 17 -16.07 0.00
 17 9 17 2.09 0.00
 19 9 17 -4.51 0.00
 21 9 17 3.76 0.00
 14 10 17 19.97 0.00
 16 10 17 8.62 0.00
 18 10 17 -2.00 0.00
 20 10 17 10.76 0.00
 15 11 17 15.99 0.00
 17 11 17 -2.87 0.00
 19 11 17 3.65 0.00
 14 12 17 -10.07 0.00
 16 12 17 2.98 0.00
 18 12 17 6.56 0.00
 20 12 17 0.72 0.00
 15 13 17 -16.43 0.00
 17 13 17 -3.03 0.00
 19 13 17 3.98 0.00
 14 14 17 14.79 0.00
 16 14 17 -3.34 0.00
 18 14 17 -5.12 0.00
 20 14 17 -1.53 0.00
 13 15 17 -2.07 0.00
 15 15 17 2.99 0.00
 17 15 17 -3.63 0.00
 19 15 17 -8.40 0.00
 12 16 17 14.61 0.00
 14 16 17 5.13 0.00
 16 16 17 21.80 0.00
 18 16 17 12.29 0.00
 13 17 17 0.86 0.00
 15 17 17 -2.06 0.00
 17 17 17 -1.36 0.00
 19 17 17 4.09 0.00
 12 18 17 4.72 0.00
 14 18 17 6.11 0.00
 16 18 17 -12.25 0.00
 18 18 17 3.49 0.00
 11 19 17 3.25 0.00
 13 19 17 -6.33 0.00
 15 19 17 -9.10 0.00
 17 19 17 -1.80 0.00
 10 20 17 12.84 0.00
 12 20 17 3.33 0.00
 14 20 17 15.81 0.00
 16 20 17 20.67 0.00
 9 21 17 11.65 0.00
 11 21 17 4.07 0.00
 13 21 17 -10.30 0.00
 15 21 17 -3.46 0.00
 17 21 17 3.10 0.00
 8 22 17 -2.22 0.00
 10 22 17 -0.17 0.00
 12 22 17 -0.54 0.00
 14 22 17 -4.08 0.00
 16 22 17 5.24 0.00
 7 23 17 5.54 0.00
 9 23 17 12.53 0.00
 11 23 17 -9.06 0.00
 13 23 17 -0.50 0.00
 15 23 17 2.82 0.00
 0 24 17 -10.39 0.00
 6 24 17 10.99 0.00
 8 24 17 -4.22 0.00
 10 24 17 -3.75 0.00
 12 24 17 0.60 0.00
 14 24 17 5.51 0.00
 3 25 17 -0.28 0.00
 5 25 17 4.14 0.00
 7 25 17 -5.19 0.00
 9 25 17 -4.30 0.00
 11 25 17 7.40 0.00
 13 25 17 -9.99 0.00
 15 25 17 -5.07 0.00
 0 26 17 28.39 0.00
 2 26 17 13.38 0.00
 4 26 17 -8.66 0.00
 6 26 17 0.94 0.00
 8 26 17 5.17 0.00
 10 26 17 1.27 0.00
 12 26 17 0.31 0.00
 14 26 17 -3.19 0.00
 1 27 17 -1.96 0.00
 3 27 17 2.75 0.00
 5 27 17 -4.59 0.00
 7 27 17 1.90 0.00
 9 27 17 -8.81 0.00
 11 27 17 -10.73 0.00
 13 27 17 -0.31 0.00
 0 28 17 18.18 0.00
 2 28 17 6.04 0.00
 4 28 17 -5.79 0.00
 6 28 17 -13.64 0.00
 8 28 17 -3.10 0.00
 10 28 17 -2.96 0.00
 12 28 17 -5.92 0.00
 1 29 17 -0.44 0.00
 3 29 17 1.01 0.00
 5 29 17 2.47 0.00
 7 29 17 9.75 0.00
 9 29 17 1.61 0.00
 11 29 17 -0.44 0.00
 0 30 17 -7.49 0.00
 2 30 17 -5.53 0.00
 4 30 17 -3.72 0.00
 6 30 17 5.33 0.00
 8 30 17 5.68 0.00
 10 30 17 2.64 0.00
 1 31 17 15.79 0.00
 3 31 17 7.72 0.00
 5 31 17 12.28 0.00
 7 31 17 -9.23 0.00
 9 31 17 -4.33 0.00
 0 32 17 8.71 0.00
 2 32 17 4.75 0.00
 4 32 17 5.49 0.00
 6 32 17 -1.25 0.00
 1 33 17 1.77 0.00
 3 33 17 3.13 0.00
 5 33 17 -5.99 0.00
 0 34 17 -0.51 0.00
 2 34 17 1.10 0.00
 12 0 18 -19.03 0.00
 14 0 18 -13.32 0.00
 16 0 18 -6.15 0.00
 18 0 18 -21.29 0.00
 20 0 18 -4.83 0.00
 13 1 18 -0.06 0.00
 15 1 18 5.81 0.00
 17 1 18 6.27 0.00
 19 1 18 6.23 0.00
 14 2 18 3.55 0.00
 16 2 18 -2.95 0.00
 18 2 18 2.93 0.00
 20 2 18 1.88 0.00
 13 3 18 1.64 0.00
 15 3 18 -3.32 0.00
 17 3 18 6.45 0.00
 19 3 18 1.72 0.00
 14 4 18 -6.89 0.00
 16 4 18 6.37 0.00
 18 4 18 10.79 0.00
 13 5 18 -5.41 0.00
 15 5 18 7.71 0.00
 17 5 18 3.87 0.00
 19 5 18 -2.44 0.00
 14 6 18 10.08 0.00
 16 6 18 2.59 0.00
 18 6 18 -0.17 0.00
 13 7 18 16.38 0.00
 15 7 18 -2.14 0.00
 17 7 18 -3.51 0.00
 19 7 18 -7.70 0.00
 12 8 18 14.38 0.00
 14 8 18 -4.73 0.00
 16 8 18 -4.12 0.00
 18 8 18 0.71 0.00
 13 9 18 -9.00 0.00
 15 9 18 9.46 0.00
 17 9 18 3.35 0.00
 19 9 18 5.51 0.00
 12 10 18 -12.86 0.00
 14 10 18 0.25 0.00
 16 10 18 8.70 0.00
 18 10 18 -2.22 0.00
 11 11 18 0.65 0.00
 13 11 18 -9.05 0.00
 15 11 18 -15.70 0.00
 17 11 18 -5.48 0.00
 12 12 18 1.14 0.00
 14 12 18 2.07 0.00
 16 12 18 -10.30 0.00
 18 12 18 1.29 0.00
 11 13 18 -18.23 0.00
 13 13 18 -1.75 0.00
 15 13 18 7.40 0.00
 17 13 18 -5.79 0.00
 10 14 18 4.48 0.00
 12 14 18 -5.99 0.00
 14 14 18 -2.60 0.00
 16 14 18 6.18 0.00
 9 15 18 0.91 0.00
 11 15 18 7.72 0.00
 13 15 18 -4.70 0.00
 15 15 18 -3.23 0.00
 17 15 18 6.22 0.00
 8 16 18 -6.37 0.00
 10 16 18 -8.91 0.00
 12 16 18 -1.50 0.00
 14 16 18 -0.50 0.00
 16 16 18 -3.76 0.00
 7 17 18 4.19 0.00
 9 17 18 -8.80 0.00
 11 17 18 -3.59 0.00
 13 17 18 2.42 0.00
 15 17 18 -6.54 0.00
 8 18 18 2.72 0.00
 10 18 18 1.76 0.00
 12 18 18 1.38 0.00
 14 18 18 -0.77 0.00
 16 18 18 -0.45 0.00
 5 19 18 0.04 0.00
 7 19 18 7.15 0.00
 9 19 18 6.67 0.00
 11 19 18 0.68 0.00
 13 19 18 2.45 0.00
 15 19 18 8.08 0.00
 4 20 18 -6.72 0.00
 6 20 18 -7.79 0.00
 8 20 18 -13.99 0.00
 10 20 18 -12.94 0.00
 12 20 18 -0.67 0.00
 14 20 18 -0.39 0.00
 1 21 18 -3.04 0.00
 3 21 18 -7.70 0.00
 5 21 18 0.96 0.00
 7 21 18 -3.86 0.00
 9 21 18 -8.92 0.00
 11 21 18 -5.93 0.00
 13 21 18 -1.82 0.00
 0 22 18 7.54 0.00
 2 22 18 0.03 0.00
 4 22 18 -6.38 0.00
 6 22 18 -6.11 0.00
 8 22 18 1.59 0.00
 10 22 18 -1.79 0.00
 12 22 18 -1.86 0.00
 14 22 18 -4.76 0.00
 1 23 18 -10.89 0.00
 3 23 18 3.56 0.00
 5 23 18 8.87 0.00
 7 23 18 0.96 0.00
 9 23 18 -1.31 0.00
 11 23 18 2.19 0.00
 13 23 18 2.71 0.00
 0 24 18 19.21 0.00
 2 24 18 3.90 0.00
 4 24 18 4.91 0.00
 6 24 18 -3.84 0.00
 8 24 18 -4.61 0.00
 10 24 18 4.13 0.00
 12 24 18 -7.62 0.00
 1 25 18 5.29 0.00
 3 25 18 1.96 0.00
 5 25 18 -6.14 0.00
 7 25 18 -5.08 0.00
 9 25 18 1.53 0.00
 11 25 18 -3.28 0.00
 0 26 18 -21.67 0.00
 2 26 18 -1.97 0.00
 4 26 18 -0.79 0.00
 6 26 18 0.46 0.00
 8 26 18 1.17 0.00
 10 26 18 -0.14 0.00
 1 27 18 -0.96 0.00
 3 27 18 -1.17 0.00
 5 27 18 3.09 0.00
 7 27 18 -1.80 0.00
 9 27 18 -1.29 0.00
 0 28 18 0.74 0.00
 2 28 18 0.03 0.00
 4 28 18 0.08 0.00
 6 28 18 2.59 0.00
 8 28 18 4.65 0.00
 1 29 18 -4.41 0.00
 3 29 18 3.99 0.00
 5 29 18 2.21 0.00
 7 29 18 6.77 0.00
 0 30 18 10.44 0.00
 2 30 18 3.50 0.00
 4 30 18 -0.28 0.00
 1 31 18 6.60 0.00
 11 1 19 4.00 0.00
 13 1 19 -4.77 0.00
 15 1 19 8.06 0.00
 17 1 19 8.28 0.00
 10 2 19 -1.27 0.00
 12 2 19 11.49 0.00
 14 2 19 -6.82 0.00
 16 2 19 1.36 0.00
 9 3 19 10.74 0.00
 11 3 19 3.17 0.00
 13 3 19 -3.15 0.00
 15 3 19 1.49 0.00
 17 3 19 3.00 0.00
 10 4 19 17.98 0.00
 12 4 19 -5.57 0.00
 14 4 19 8.28 0.00
 16 4 19 3.69 0.00
 9 5 19 9.42 0.00
 11 5 19 -3.79 0.00
 13 5 19 2.45 0.00
 15 5 19 1.94 0.00
 17 5 19 -1.07 0.00
 10 6 19 -1.55 0.00
 12 6 19 14.38 0.00
 14 6 19 13.47 0.00
 16 6 19 -2.99 0.00
 9 7 19 -6.69 0.00
 11 7 19 8.96 0.00
 13 7 19 -0.23 0.00
 15 7 19 0.12 0.00
 17 7 19 -2.34 0.00
 8 8 19 6.66 0.00
 10 8 19 8.34 0.00
 12 8 19 4.61 0.00
 14 8 19 -4.48 0.00
 16 8 19 3.95 0.00
 9 9 19 4.99 0.00
 11 9 19 -5.91 0.00
 13 9 19 6.09 0.00
 15 9 19 1.14 0.00
 8 10 19 -2.59 0.00
 10 10 19 3.53 0.00
 12 10 19 0.56 0.00
 14 10 19 -5.86 0.00
 16 10 19 -5.52 0.00
 7 11 19 -3.35 0.00
 9 11 19 -11.27 0.00
 11 11 19 8.88 0.00
 13 11 19 3.35 0.00
 15 11 19 -2.75 0.00
 6 12 19 8.44 0.00
 8 12 19 5.80 0.00
 10 12 19 -3.99 0.00
 12 12 19 -3.44 0.00
 14 12 19 2.62 0.00
 5 13 19 2.19 0.00
 7 13 19 1.76 0.00
 9 13 19 12.11 0.00
 11 13 19 -1.91 0.00
 13 13 19 -9.25 0.00
 15 13 19 -0.16 0.00
 0 14 19 35.81 0.00
 2 14 19 13.51 0.00
 4 14 19 13.65 0.00
 6 14 19 -4.26 0.00
 8 14 19 -0.91 0.00
 10 14 19 2.50 0.00
 12 14 19 -4.29 0.00
 14 14 19 -6.48 0.00
 1 15 19 12.81 0.00
 3 15 19 3.08 0.00
 5 15 19 2.63 0.00
 7 15 19 -2.91 0.00
 9 15 19 -3.79 0.00
 11 15 19 -2.77 0.00
 13 15 19 2.72 0.00
 0 16 19 1.04 0.00
 2 16 19 16.69 0.00
 4 16 19 -1.21 0.00
 6 16 19 4.04 0.00
 8 16 19 -4.58 0.00
 10 16 19 -4.71 0.00
 12 16 19 -6.12 0.00
 14 16 19 -1.91 0.00
 1 17 19 5.91 0.00
 3 17 19 -0.10 0.00
 5 17 19 -2.72 0.00
 7 17 19 2.25 0.00
 9 17 19 -1.06 0.00
 11 17 19 5.36 0.00
 13 17 19 0.93 0.00
 0 18 19 3.66 0.00
 2 18 19 -7.73 0.00
 4 18 19 7.62 0.00
 6 18 19 -2.91 0.00
 8 18 19 6.60 0.00
 10 18 19 6.98 0.00
 12 18 19 0.03 0.00
 1 19 19 -4.86 0.00
 3 19 19 -2.85 0.00
 5 19 19 -2.92 0.00
 7 19 19 -9.97 0.00
 9 19 19 -0.14 0.00
 11 19 19 -7.51 0.00
 0 20 19 -0.46 0.00
 2 20 19 1.67 0.00
 4 20 19 -9.63 0.00
 6 20 19 -3.45 0.00
 8 20 19 -2.99 0.00
 10 20 19 -5.67 0.00
 1 21 19 6.65 0.00
 3 21 19 3.92 0.00
 5 21 19 -4.48 0.00
 7 21 19 4.65 0.00
 9 21 19 -3.46 0.00
 11 21 19 3.66 0.00
 0 22 19 4.36 0.00
 2 22 19 4.50 0.00
 4 22 19 -7.16 0.00
 6 22 19 1.69 0.00
 8 22 19 -1.62 0.00
 10 22 19 2.65 0.00
 1 23 19 7.36 0.00
 3 23 19 -3.42 0.00
 5 23 19 0.92 0.00
 7 23 19 -4.28 0.00
 9 23 19 -5.76 0.00
 0 24 19 15.36 0.00
 2 24 19 0.94 0.00
 4 24 19 1.22 0.00
 6 24 19 -8.83 0.00
 8 24 19 -1.56 0.00
 1 25 19 -13.54 0.00
 3 25 19 -5.19 0.00
 5 25 19 -4.86 0.00
 0 26 19 -1.01 0.00
 2 26 19 3.58 0.00
 4 26 19 4.46 0.00
 1 27 19 5.12 0.00
 0 0 0 0.00 0.00
# SQUEEZE RESULTS (Version = 150216)
# Note: Data are Listed for all Voids in the P1 Unit Cell
# i.e. Centre of Gravity, Solvent Accessible Volume,
# Recovered number of Electrons in the Void and
# Details about the Squeezed Material
;
loop_
  _platon_missing_refln_index_h
  _platon_missing_refln_index_k
  _platon_missing_refln_index_l
  _platon_missing_refln_theta
 2 0 0 3.311
 1 1 0 1.971
 0 2 0 2.140
 0 4 0 4.283

_platon_squeeze_details
;
TITL exp_2229 in Cmcm
CELL   26.6952   41.2943   16.8339     90.00     90.00     90.00
SPGR Cmcm
# Solvent Accessible Volume =     10377
# Electrons Found in S.A.V. =      2491
# Note: Atoms in Void as Cxxx and Qxxx all others
Q101 0.329 0.242 0.243 !       3.20 eA-3
C102 0.500 0.078 0.247 !       2.70 eA-3
C103 0.689 0.148 0.247 !       2.35 eA-3
C104 0.734 0.156 0.259 !       2.28 eA-3
C105 0.659 0.313 0.249 !       2.27 eA-3
C106 0.485 0.406 0.250 !       2.18 eA-3
C107 0.828 0.156 0.254 !       1.85 eA-3
C108 0.679 0.336 0.253 !       1.85 eA-3
C109 1.000 0.484 0.254 !       1.76 eA-3
C110 0.500 0.031 0.251 !       1.63 eA-3
C111 1.000 0.330 0.013 !       1.60 eA-3
Q112 0.500 0.133 0.250 !       1.47 eA-3
C113 0.597 0.461 0.249 !       1.38 eA-3
C114 0.500 0.014 0.147 !       1.36 eA-3
Q115 0.086 0.268 0.110 !       1.36 eA-3
C116 0.977 0.160 0.340 !       1.35 eA-3
C117 1.000 0.324 0.160 !       1.35 eA-3
C118 0.742 0.176 0.209 !       1.30 eA-3
C119 0.500 0.417 0.467 !       1.29 eA-3
C120 0.614 0.445 0.251 !       1.27 eA-3
C121 0.704 0.244 0.477 !       1.26 eA-3
C122 0.828 0.352 0.248 !       1.26 eA-3
C123 1.000 0.321 0.222 !       1.25 eA-3
C124 0.795 0.203 0.172 !       1.25 eA-3
C125 0.909 0.383 0.251 !       1.25 eA-3
C126 1.000 0.141 0.380 !       1.23 eA-3
C127 0.219 0.352 0.249 !       1.23 eA-3
C128 0.532 0.039 0.266 !       1.23 eA-3
C129 0.585 0.465 0.312 !       1.22 eA-3
C130 0.431 0.430 0.255 !       1.22 eA-3
C131 1.000 0.198 0.476 !       1.20 eA-3
C132 1.000 0.171 0.115 !       1.19 eA-3
C133 0.423 0.414 0.248 !       1.19 eA-3
C134 0.381 0.063 0.250 !       1.18 eA-3
C135 0.298 0.375 0.246 !       1.16 eA-3
C136 0.953 0.148 0.244 !       1.15 eA-3
C137 0.464 0.022 0.291 !       1.15 eA-3
C138 0.446 0.461 0.255 !       1.15 eA-3
Q139 0.477 0.336 0.245 !       1.14 eA-3
C140 0.036 0.476 0.803 !       1.14 eA-3
C141 0.702 0.328 0.254 !       1.13 eA-3
C142 1.000 0.134 0.321 !       1.12 eA-3
C143 0.969 0.114 0.180 !       1.12 eA-3
C144 0.843 0.180 0.284 !       1.11 eA-3
C145 0.780 0.289 0.073 !       1.11 eA-3
C146 1.000 0.376 0.375 !       1.09 eA-3
C147 0.685 0.322 0.215 !       1.07 eA-3
C148 0.822 0.312 0.249 !       1.07 eA-3
C149 0.446 0.031 0.186 !       1.06 eA-3
C150 1.000 0.222 0.060 !       1.06 eA-3
C151 0.569 0.031 0.250 !       1.06 eA-3
C152 0.960 0.137 0.151 !       1.06 eA-3
Q153 0.969 0.211 0.483 !       1.05 eA-3
C154 0.500 0.102 0.243 !       1.05 eA-3
C155 0.459 0.016 0.254 !       1.04 eA-3
C156 0.507 0.008 0.248 !       1.03 eA-3
Q157 0.929 0.246 0.460 !       1.03 eA-3
C158 0.737 0.352 0.253 !       1.03 eA-3
C159 1.000 0.071 0.449 !       1.02 eA-3
C160 0.875 0.344 0.254 !       1.01 eA-3
C161 0.750 0.370 0.217 !       1.00 eA-3
C162 0.211 0.145 0.282 !       1.00 eA-3
C163 1.000 0.353 0.051 !       1.00 eA-3
C164 0.289 0.349 0.780 !       1.00 eA-3
C165 0.975 0.078 0.241 !       1.00 eA-3
C166 0.562 0.022 0.330 !       0.99 eA-3
C167 0.622 0.451 0.214 !       0.98 eA-3
Q168 0.288 0.242 0.254 !       0.98 eA-3
C169 0.447 0.045 0.294 !       0.98 eA-3
C170 0.476 0.463 0.127 !       0.98 eA-3
C171 0.027 0.469 0.836 !       0.98 eA-3
C172 1.000 0.461 0.015 !       0.98 eA-3
Q173 1.000 0.255 0.484 !       0.97 eA-3
C174 0.969 0.023 0.250 !       0.97 eA-3
C175 1.000 0.468 0.153 !       0.97 eA-3
C176 0.462 0.485 0.393 !       0.96 eA-3
C177 0.025 0.068 0.507 !       0.96 eA-3
C178 0.539 0.459 0.311 !       0.96 eA-3
C179 1.000 0.110 0.180 !       0.96 eA-3
C180 0.038 0.312 0.253 !       0.96 eA-3
C181 0.438 0.366 0.803 !       0.96 eA-3
C182 0.062 0.134 0.197 !       0.96 eA-3
C183 0.857 0.164 0.251 !       0.95 eA-3
C184 0.034 0.319 0.201 !       0.95 eA-3
C185 0.500 0.478 0.393 !       0.95 eA-3
C186 0.906 0.141 0.248 !       0.95 eA-3
C187 0.362 0.453 0.253 !       0.94 eA-3
C188 0.372 0.440 0.186 !       0.94 eA-3
C189 0.048 0.383 0.251 !       0.94 eA-3
C190 0.312 0.117 0.249 !       0.93 eA-3
C191 0.877 0.383 0.244 !       0.93 eA-3
C192 0.099 0.402 0.215 !       0.92 eA-3
C193 0.040 0.148 0.178 !       0.92 eA-3
C194 0.396 0.471 0.159 !       0.92 eA-3
C195 0.486 0.015 0.422 !       0.92 eA-3
C196 0.500 0.448 0.343 !       0.92 eA-3
Q197 0.952 0.285 0.042 !       0.91 eA-3
C198 0.979 0.170 0.215 !       0.91 eA-3
C199 0.261 0.383 0.246 !       0.91 eA-3
;
loop_
  _platon_squeeze_void_nr
  _platon_squeeze_void_average_x
  _platon_squeeze_void_average_y
  _platon_squeeze_void_average_z
  _platon_squeeze_void_volume
  _platon_squeeze_void_count_electrons
  _platon_squeeze_void_content
 1 -0.022 -0.002 -0.002 10417 2494 ' '

_platon_squeeze_void_probe_radius 1.20
loop_
  _refln_index_h
  _refln_index_k
  _refln_index_l
  _refln_F_squared_meas
  _refln_F_squared_sigma
  _refln_scale_group_code
 0 0 2 86892.3 1121.18 1
 0 0 3 -5.00069 208.447 1
 0 0 4 12033.2 622.954 1
 0 0 5 -103.119 202.125 2
 0 0 5 95.7588 276.652 1
 0 0 6 21543.2 726.667 2
 0 0 7 63.8405 184.355 2
 0 0 8 190367 2462.77 2
 0 0 9 324.051 260.471 2
 0 0 10 245502 3232.57 2
 0 0 11 427.786 303.819 2
 0 0 12 65294.5 1941.81 2
 0 0 13 648.342 573.369 4
 0 0 14 538.706 561.798 4
 0 0 15 -557.186 620.262 4
 0 0 16 619.962 456.758 4
 0 0 17 -461.035 538.663 4
 0 0 18 8355.32 1019.86 4
 0 0 19 142.502 392.607 4
 0 -2 1 37964.6 465.89 1
 0 -2 2 135012 1324.43 1
 0 -2 3 10200.7 512.034 1
 0 -2 3 10878.2 352.233 2
 0 -2 4 13576.4 679.623 1
 0 -2 4 13731.3 469.235 2
 0 -2 5 14998.4 540.74 2
 0 -2 5 15588.5 816.829 1
 0 -2 6 17798 931.983 1
 0 -2 6 18070.3 663.037 2
 0 -2 7 1077.35 408.397 1
 0 -2 7 704.565 234.494 2
 0 2 7 514.323 239.3 2
 0 2 8 317950 3268.52 2
 0 -2 8 324932 3211.41 2
 0 2 9 5200.19 494.338 2
 0 -2 9 5865.08 521.107 2
 0 2 10 147703 2548.95 2
 0 -2 10 155160 2628.29 2
 0 -2 11 1956.94 484.442 6
 0 2 11 2230.36 410.351 2
 0 -2 12 15272 1206.67 4
 0 2 12 12748 867.833 2
 0 -2 13 923.794 596.736 4
 0 2 14 1370.83 652.502 4
 0 -2 14 -172.882 485.472 4
 0 2 15 538.625 552.558 4
 0 -2 15 -1170.78 701.943 4
 0 2 16 403.296 476.565 4
 0 -2 16 359.878 480.463 4
 0 2 17 164.986 507.052 4
 0 -2 17 735.231 502 4
 0 2 18 27165.7 1716.89 4
 0 -2 18 26254.2 1633.41 4
 0 -2 19 295.902 359.182 4
 0 2 19 340.37 404.59 4
 0 -4 1 13270.9 354.299 1
 0 -4 2 153065 1357.24 1
 0 -4 3 1678.2 243.627 1
 0 -4 4 564040 2932.32 2
 0 -4 4 573379 3988.3 1
 0 -4 5 25951.8 1055.58 1
 0 -4 5 26913.2 731.616 2
 0 -4 6 105686 2273.7 1
 0 -4 6 108197 1592.27 2
 0 -4 7 2284.29 455.368 1
 0 -4 7 2359.7 313.994 2
 0 -4 8 66889.9 1504.92 2
 0 -4 8 63690.1 2033.24 1
 0 4 9 24957.3 1029.94 2
 0 -4 10 63525.4 2107.83 4
 0 4 10 63495.1 1717.5 2
 0 -4 11 802.542 467.206 4
 0 4 11 115.158 238.065 2
 0 -4 11 -102.299 377.574 6
 0 -4 12 976.409 408.115 6
 0 4 12 948.883 336.511 2
 0 -4 12 1909.07 633.483 4
 0 4 13 906.834 331.487 2
 0 -4 13 843.616 471.277 4
 0 -4 14 14239.2 1309.96 4
 0 -4 15 353.189 491.65 4
 0 4 15 2050.26 713.821 4
 0 -4 16 10413.1 1138.5 4
 0 4 16 14670.2 1392.85 4
 0 4 17 1425.08 604.363 4
 0 -4 17 1582.88 545.799 4
 0 -4 18 3062.21 675.775 4
 0 4 18 3178.46 726.418 4
 0 4 19 797.145 469.961 4
 0 -4 19 653.355 390.35 4
 0 -6 0 56703.9 961.592 1
 0 -6 1 10610 384.661 1
 0 -6 2 220921 1764.83 1
 0 -6 3 8307.89 449.462 1
 0 -6 4 40129.9 1046.94 1
 0 -6 5 78129.8 1672.39 1
 0 -6 6 130169 2535.09 1
 0 -6 7 7228.27 696.559 1
 0 -6 8 13223.3 951.669 1
 0 -6 9 17627.2 1178.23 1
 0 -6 10 40097.2 1665.42 6
 0 6 10 44019.3 1480.79 2
 0 -6 11 -267.3 421.19 6
 0 -6 11 -215.573 394.797 4
 0 6 11 -263.889 294.546 2
 0 -6 12 4502.26 648.088 6
 0 -6 12 5531.38 825.832 4
 0 6 12 5824.35 634.508 2
 0 -6 13 7929.28 798.797 6
 0 -6 13 8316.98 1000.89 4
 0 -6 14 75457.1 2864.5 4
 0 -6 15 11769.3 1228.32 4
 0 -6 16 6736.3 952.16 4
 0 6 16 10580.8 1248.69 4
 0 -6 17 215.528 423.556 4
 0 6 17 -176.521 573.81 4
 0 6 18 7447.36 1009.04 4
 0 -6 18 6209.26 846.971 4
 0 6 19 1302.36 503.931 4
 0 -8 0 48339.2 1046.74 1
 0 -8 1 5588.33 341.862 1
 0 -8 2 150120 1651.23 1
 0 -8 3 186112 1895.21 1
 0 -8 4 37872.8 1014.46 1
 0 -8 5 81887.4 1677.66 1
 0 -8 6 323703 3792.06 1
 0 -8 7 45922.4 1619.7 1
 0 -8 8 159.014 312.14 1
 0 -8 9 2886.41 549.861 1
 0 -8 9 1978.73 489.435 6
 0 -8 9 1926.09 444.761 4
 0 -8 10 9003.96 957.352 4
 0 -8 10 9459.91 862.698 6
 0 -8 11 5157.76 747.372 4
 0 -8 11 6093.27 712.75 6
 0 8 11 5319.12 597.445 2
 0 -8 12 5313.63 709.464 6
 0 8 12 5319.58 621.932 2
 0 -8 12 6083.77 831.134 4
 0 -8 13 32816.6 1886.24 4
 0 -8 13 31485.7 1556.9 6
 0 -8 14 68930.3 2255.28 6
 0 -8 14 74167.2 2829.73 4
 0 -8 15 18625.7 1472.84 4
 0 8 16 44772.7 2318.67 4
 0 -8 16 35559.1 1987.91 4
 0 8 17 1268.17 682.87 4
 0 -8 17 -99.3413 419.413 4
 0 8 18 326.679 499.106 4
 0 8 19 14.909 403.68 4
 0 -10 0 228590 2534.12 1
 0 -10 1 20276 712.218 1
 0 -10 2 962.135 231.956 1
 0 -10 3 13738.5 576.145 1
 0 -10 4 81753.1 1516.35 1
 0 -10 5 164082 2396.04 1
 0 -10 6 191318 2920.09 1
 0 -10 7 147675 2880.57 1
 0 -10 8 12240.4 945.792 1
 0 -10 9 17442.3 1095.65 6
 0 -10 9 15945.7 1156.93 1
 0 -10 9 14615.3 1025.31 4
 0 -10 10 42283.5 1714.15 6
 0 -10 10 38838 1756.48 4
 0 10 11 69.0073 308.956 2
 0 -10 11 239.137 407.186 4
 0 -10 11 153.552 431.661 6
 0 -10 12 -279.247 498.144 6
 0 10 12 494.053 314.545 2
 0 -10 12 575.243 389.554 4
 0 -10 13 18273.3 1215.65 6
 0 -10 13 20801.5 1488.5 4
 0 -10 14 35266.8 1970.96 4
 0 -10 14 35013.5 1647 6
 0 -10 15 47821.6 2302 4
 0 -10 15 44930.1 1828.72 6
 0 -10 16 4494.25 787.337 4
 0 -10 17 -168.137 420.99 4
 0 10 17 871.162 650.633 4
 0 10 18 88.3728 522.82 4
 0 10 19 -142.801 411.061 4
 0 -12 0 213592 2725.01 1
 0 -12 1 208391 2441.16 1
 0 -12 2 4588.61 407.331 1
 0 -12 3 17405.2 742.544 1
 0 -12 4 7382.61 492.305 1
 0 -12 5 186477 2619.98 1
 0 -12 6 159444 2641.69 1
 0 -12 7 108234 2439.11 1
 0 -12 8 7610.69 770.916 1
 0 -12 8 8382.55 760.127 6
 0 -12 9 94505.3 2472.6 6
 0 -12 9 92242.9 2639.64 1
 0 -12 10 25449.5 1434.97 4
 0 -12 10 26310.3 1372.69 6
 0 -12 10 26382.4 1451.68 1
 0 -12 11 5482.48 768.655 4
 0 -12 11 5304.4 682.719 6
 0 -12 12 272.031 392.893 4
 0 12 12 -143.733 316.433 2
 0 -12 13 885.117 450.108 4
 0 -12 13 1484.69 506.264 6
 0 -12 14 19599.4 1262.65 6
 0 -12 14 19102.8 1479.14 4
 0 -12 15 14910.1 1085.56 6
 0 -12 15 14770.4 1327.12 4
 0 -12 16 3469.13 559.712 6
 0 12 17 1050.97 624.795 4
 0 12 18 934.416 570.28 4
 0 12 19 435.066 399.196 4
 0 -14 0 100173 2023.76 1
 0 -14 -1 229420 3073.98 1
 0 -14 1 218496 2730.3 1
 0 -14 2 6678.39 492.14 1
 0 -14 3 3755.21 392.615 1
 0 -14 4 25260.6 932.755 1
 0 -14 5 50715.8 1437.96 1
 0 -14 6 92283.5 2079.79 1
 0 -14 7 -83.2776 312.702 6
 0 -14 7 10.5514 232.738 1
 0 -14 8 15026.2 996.229 6
 0 -14 8 12692.2 956.823 4
 0 -14 8 14329.2 1030.05 1
 0 -14 9 66501.4 2105.77 6
 0 -14 9 61086.8 2131.68 4
 0 -14 9 60641.4 2223.43 1
 0 -14 10 12579.6 989.862 6
 0 -14 10 11965.4 1049.24 4
 0 -14 10 12068.8 1036.61 1
 0 -14 11 16974.6 1286.59 4
 0 -14 11 17030.1 1166.43 6
 0 -14 12 813.924 434.947 4
 0 14 12 806.893 368.228 2
 0 -14 12 1590.3 516.191 6
 0 -14 13 9821.61 1083.92 4
 0 -14 13 10015 947.666 6
 0 -14 14 -373.954 535.142 4
 0 -14 14 334.092 371.756 6
 0 -14 15 9348.75 885.875 6
 0 -14 16 501.612 341.893 6
 0 14 17 10062.1 1208.19 4
 0 14 18 1532.19 610.551 4
 0 -16 0 29734.5 1181.61 1
 0 -16 -1 151602 2712.88 1
 0 -16 1 149316 2460.99 1
 0 -16 2 10525.6 651.044 1
 0 -16 3 1786.25 325.194 1
 0 -16 4 4254.22 432.356 1
 0 -16 5 57731.5 1573.12 1
 0 -16 6 3117.36 452.808 1
 0 -16 7 23982.4 1186.29 6
 0 -16 -7 22564.5 949.056 3
 0 -16 7 23651.6 1203.53 1
 0 -16 8 3784.2 570.026 6
 0 -16 -8 3817.75 444.455 3
 0 -16 8 3509.06 564.605 1
 0 -16 9 121658 3114.35 4
 0 -16 9 124889 3277.1 1
 0 -16 -9 120534 2304.38 3
 0 -16 10 8225.11 827.163 6
 0 -16 10 6622.38 808.556 1
 0 -16 10 7789.98 892.302 4
 0 -16 11 43268 2060.49 4
 0 -16 11 44353.9 1870.65 6
 0 -16 12 359.289 451.678 6
 0 -16 13 1265.6 524.558 6
 0 -16 14 3706.69 629.883 6
 0 -16 15 4877.22 663.049 6
 0 -16 16 41.6281 305.526 6
 0 16 17 5750.64 970.475 4
 0 -16 17 2506.69 451.539 6
 0 16 18 4099.2 803.016 4
 0 -18 0 26830 1173.36 1
 0 -18 1 118817 2326.56 1
 0 -18 -1 116671 2557.92 1
 0 -18 -2 -125.753 320.127 1
 0 -18 2 166.264 241.247 1
 0 -18 3 4145.71 460.221 1
 0 -18 4 3431.5 419.044 1
 0 -18 5 419.78 259.534 1
 0 -18 6 4304.89 538.094 6
 0 -18 6 4598.16 526.312 1
 0 -18 -6 4538.35 460.51 3
 0 -18 -7 15947.4 841.671 3
 0 -18 7 15182.3 1007.66 1
 0 -18 7 16235.1 1014.67 6
 0 -18 -8 4315.37 498.823 3
 0 -18 8 3508.42 581.727 1
 0 -18 8 3618.3 576.126 6
 0 -18 -9 107109 2284.05 3
 0 -18 9 105816 2723.24 6
 0 -18 10 4840.4 739.962 6
 0 -18 11 13227.7 1080.06 6
 0 -18 12 664.691 478.376 6
 0 -18 13 3452.74 639.865 6
 0 -18 14 302.419 380.387 6
 0 -18 15 3482.94 593.593 6
 0 -18 16 192.144 302.287 6
 0 -18 17 7499.62 713.533 6
 0 18 18 1576.6 600.518 4
 0 -20 0 2613.7 481.508 1
 0 -20 -1 191561 3445.29 1
 0 -20 1 202511 3231.31 1
 0 -20 2 682.08 297.847 1
 0 -20 -2 524.285 336.454 1
 0 -20 3 127379 2439.22 1
 0 -20 -4 171.76 232.439 3
 0 -20 4 317.099 228.185 1
 0 -20 5 51890.7 1651.87 6
 0 -20 5 50774.5 1613.34 1
 0 -20 -5 53781 1434.04 3
 0 -20 -6 317.84 266.851 3
 0 -20 6 352.153 327.862 6
 0 -20 6 152.931 239.568 1
 0 -20 7 9961.65 823.206 1
 0 -20 -7 11199.4 742.126 3
 0 -20 7 11907.6 923.421 6
 0 -20 8 315.273 301.538 1
 0 -20 8 1023.7 492.97 6
 0 -20 -8 416.455 330.34 3
 0 -20 -9 50081.9 1631.1 3
 0 -20 9 47150.1 1871.28 6
 0 -20 10 902.234 520.128 6
 0 -20 11 54602.3 2098.36 6
 0 -20 12 194.191 390.751 6
 0 -20 13 973.295 462.485 6
 0 -20 14 -50.329 354.286 6
 0 -20 15 20913.6 1254.36 6
 0 -20 16 -1.78348 310.276 6
 0 -20 17 1326.5 359.163 6
 0 20 18 729.283 460.151 4
 0 -22 0 8439.35 784.053 1
 0 -22 -1 151383 3112.1 1
 0 -22 1 153484 2976.89 1
 0 -22 2 -7.43447 237.344 1
 0 -22 -2 -16.4186 334.996 1
 0 -22 -2 164.574 259.094 3
 0 -22 -3 106747 2905.94 1
 0 -22 3 109806 2416.54 1
 0 -22 -3 101300 1944.58 3
 0 -22 4 3389.72 534.195 6
 0 -22 4 3293.4 518.376 5
 0 -22 4 3003.46 488.012 1
 0 -22 -4 2549.75 449.971 3
 0 -22 -5 121784 2252.72 3
 0 -22 5 125628 2632.15 6
 0 -22 5 118966 2582.25 1
 0 -22 6 1019.31 367.635 5
 0 -22 -6 1394.07 365.713 3
 0 -22 6 1691.24 478.913 6
 0 -22 6 1282.8 349.217 1
 0 -22 7 21801.3 1230.48 6
 0 -22 -7 20726.7 1022.04 3
 0 -22 -8 19.4579 319.769 3
 0 -22 8 300.981 383.251 6
 0 -22 9 23897.3 1372.42 6
 0 -22 -9 21739.3 1140.17 3
 0 -22 10 868.4 498.794 6
 0 -22 11 2006.27 548.012 6
 0 -22 12 -76.8934 405.896 6
 0 -22 13 14747 1124.23 6
 0 -22 14 80.9681 370.935 6
 0 -22 15 30234.7 1471.03 6
 0 -22 16 -187.858 326.459 6
 0 -22 17 -71.8017 207.277 6
 0 -24 0 16474.9 852.818 3
 0 -24 0 17415.3 1101.44 1
 0 -24 -1 80681.5 1825.07 3
 0 -24 -1 84443.2 2354.51 1
 0 -24 -2 -15.4095 229.164 3
 0 -24 2 23.3639 231.011 1
 0 -24 2 -68.7724 226.19 6
 0 -24 -2 34.5107 301.126 1
 0 -24 -3 100893 2971.06 1
 0 -24 3 91158 2174.26 6
 0 -24 3 99702.6 2233.46 5
 0 -24 3 101482 2416.31 1
 0 -24 -3 94543.5 1964.58 3
 0 -24 4 13102.4 920.795 6
 0 -24 -4 12956.2 807.375 3
 0 -24 4 13955.6 922.965 1
 0 -24 4 12833.9 907.274 5
 0 -24 -4 13858 1223.47 1
 0 -24 -5 338507 3858.42 3
 0 -24 5 345345 4509.45 6
 0 -24 -6 12343.4 822.216 3
 0 -24 6 12446 963.993 6
 0 -24 6 10255.1 824.899 5
 0 -24 7 74561.8 2292.54 6
 0 -24 -7 72196.9 1912.56 3
 0 -24 8 386.185 413.649 6
 0 -24 -8 -93.2366 348.523 3
 0 -24 9 27276.1 1497.61 6
 0 -24 10 56.9813 437.905 6
 0 -24 11 26.8991 419.854 6
 0 -24 12 146.887 417.28 6
 0 -24 13 9459.39 920.22 6
 0 -24 14 4218.82 667.824 6
 0 -24 15 33973.4 1545.69 6
 0 -24 16 981.678 347.087 6
 0 -26 0 13971.5 1026.4 1
 0 -26 0 12712.7 779.608 3
 0 -26 -1 17509.4 1187.77 1
 0 -26 -1 17592.8 901.947 3
 0 -26 1 14472.8 890.439 6
 0 -26 1 19055.8 1157.23 1
 0 -26 1 17125.6 898.807 3
 0 -26 -2 389.99 278.641 3
 0 -26 -2 752.514 373.202 1
 0 -26 2 280.914 238.915 6
 0 -26 2 449.538 290.628 1
 0 -26 2 590.176 321.183 5
 0 -26 2 305.922 245.097 3
 0 -26 -3 55508.2 2283.96 1
 0 -26 3 59250.5 1801.66 5
 0 -26 -3 54281.2 1568.72 3
 0 -26 3 55660.6 1780.76 6
 0 -26 4 27253 1282.44 5
 0 -26 4 25941.6 1272.75 6
 0 -26 -4 27880.5 1749.24 1
 0 -26 -4 25638.8 1127.51 3
 0 -26 -5 179124 2920.6 3
 0 -26 -5 173519 4457.65 1
 0 -26 5 185911 3413.83 6
 0 -26 5 178902 3351.15 5
 0 -26 -6 44853 2366.55 1
 0 -26 6 48690.4 1850.01 6
 0 -26 -6 47600.2 1573.05 3
 0 -26 -7 6294.05 660.28 3
 0 -26 7 6749.1 802.494 6
 0 -26 -8 2385.35 463.259 3
 0 -26 8 3487.66 660.631 6
 0 -26 9 6312.39 817.938 6
 0 -26 10 598.023 469.553 6
 0 -26 11 583.544 427.562 6
 0 -26 12 1651.67 526.675 6
 0 -26 13 50693.6 1984.78 6
 0 -26 14 3181.05 572.538 6
 0 -26 15 32100.3 1458.8 6
 0 -26 16 2704.07 437.796 6
 0 -28 0 14244.9 848.834 3
 0 -28 0 14052.4 1061.51 1
 0 -28 1 19757.6 980.398 3
 0 -28 -1 19956.1 994.762 3
 0 -28 -1 19057.4 1246.13 1
 0 -28 2 -134.998 289.672 3
 0 -28 -2 0.80866 294.745 3
 0 -28 -2 66.2805 274.457 1
 0 -28 2 143.138 271.776 6
 0 -28 2 158.35 318.251 5
 0 -28 -3 24055 1108.86 3
 0 -28 3 24815.8 1247.35 6
 0 -28 -3 23927.3 1532.46 1
 0 -28 3 26835.3 1254.69 5
 0 -28 4 22253 1216.82 6
 0 -28 -4 21639.6 1069.19 3
 0 -28 4 23888.3 1235.91 5
 0 -28 -4 20337.4 1536.08 1
 0 -28 -5 90865.1 3355.51 1
 0 -28 5 96977.8 2541.54 5
 0 -28 5 97399.9 2571.5 6
 0 -28 -5 94728.1 2206.19 3
 0 -28 6 7880.06 796.613 5
 0 -28 6 8757.24 865.597 6
 0 -28 -6 8250.68 729.819 3
 0 -28 -6 8200.27 1153.18 1
 0 -28 -7 177.849 458.951 1
 0 -28 -7 194.597 344.916 3
 0 -28 7 165.273 379.394 6
 0 -28 -8 -201.831 508.639 1
 0 -28 8 -161.986 436.583 6
 0 -28 -8 -185.837 393.137 3
 0 -28 9 34301.3 1722.63 6
 0 -28 10 8236.66 906.261 6
 0 -28 11 789.831 439.704 6
 0 -28 12 1579.81 521.346 6
 0 -28 13 13751.7 1083.12 6
 0 -28 14 16531.8 1121.31 6
 0 -28 15 14571.8 930.928 6
 0 -28 16 820.686 273.239 6
 0 -30 0 38551.8 1388.3 3
 0 -30 -1 51164 1627.83 3
 0 -30 1 51975.2 1592.45 3
 0 -30 1 53778.4 1716.18 5
 0 -30 -2 2549.36 467.191 3
 0 -30 2 2500.87 472.907 6
 0 -30 2 2637.52 420.986 3
 0 -30 2 2720.14 521.915 5
 0 -30 3 2699.12 496.398 6
 0 -30 -3 1977.73 518.663 1
 0 -30 -3 2646.47 460.741 3
 0 -30 3 2911.17 542.32 5
 0 -30 4 15039 1059.63 6
 0 -30 -4 13501.5 886.949 3
 0 -30 -4 12633.1 1221.99 1
 0 -30 4 14761.9 1031.82 5
 0 -30 -5 193.344 346.592 3
 0 -30 5 382.514 353.599 6
 0 -30 -5 481.345 460.45 1
 0 -30 5 -60.3992 375.701 5
 0 -30 -6 2617.69 727.117 1
 0 -30 -6 3525.91 546.217 3
 0 -30 6 3400.04 600.265 5
 0 -30 6 3941.07 636.223 6
 0 -30 7 11211.3 995.602 6
 0 -30 -7 9784.78 806.634 3
 0 -30 8 14592 1162.01 6
 0 -30 9 51636.9 2111.05 6
 0 -30 10 30064.6 1626.12 6
 0 -30 11 15401.6 1194.75 6
 0 -30 12 -253.211 416.974 6
 0 -30 13 4648.72 652.416 6
 0 -30 14 7630.67 729.995 6
 0 -30 15 7087.32 629.001 6
 0 -32 0 131929 2614.81 3
 0 -32 1 58381.2 1859.51 5
 0 -32 1 57881.1 1724.41 3
 0 -32 -1 61213.9 1828.67 3
 0 -32 2 16741.2 925.94 3
 0 -32 2 18423.9 1104.82 5
 0 -32 -2 18261.9 1048.97 3
 0 -32 2 15643.9 1029.72 6
 0 -32 3 4291.08 596.488 6
 0 -32 3 4427.38 617.919 5
 0 -32 -3 4187.16 568.821 3
 0 -32 -4 5496.39 640.688 3
 0 -32 4 5511.53 699.032 6
 0 -32 4 5462.62 696.342 5
 0 -32 5 2705.89 558.138 6
 0 -32 -5 2455.09 481.566 3
 0 -32 5 2372.28 524.696 5
 0 -32 6 46902.8 1975.96 6
 0 -32 -6 43195.4 1587.66 3
 0 -32 7 465.298 416.401 6
 0 -32 8 22727.6 1433 6
 0 -32 9 60064.6 2299.24 6
 0 -32 10 63639.6 2354.99 6
 0 -32 11 20819 1329.12 6
 0 -32 12 7768.18 818.706 6
 0 -32 13 121.148 294.4 6
 0 -32 14 2749.65 446.581 6
 0 -34 0 131887 2801.93 5
 0 -34 0 135872 2694.55 3
 0 -34 -1 55768.4 1791 3
 0 -34 1 55622.9 1837.89 5
 0 -34 1 53267.4 1688.26 3
 0 -34 -2 37007.8 1482.91 3
 0 -34 2 35278 1495.75 5
 0 -34 3 28615.3 1418.98 6
 0 -34 -3 30931.8 1386.73 3
 0 -34 3 29025 1390.49 5
 0 -34 -4 106.712 354.682 3
 0 -34 4 545.922 376.508 5
 0 -34 4 801.688 369.934 6
 0 -34 -5 23710.4 1226.46 3
 0 -34 5 22981.7 1307.62 5
 0 -34 5 22799.7 1336.12 6
 0 -34 6 8011.35 803.436 5
 0 -34 6 9069.63 891.288 6
 0 -34 7 468.709 378.415 6
 0 -34 8 42894.6 1895.25 6
 0 -34 9 38111.3 1785.71 6
 0 -34 10 60019.3 2157.59 6
 0 -34 11 23422 1331.57 6
 0 -34 12 11344.9 885.065 6
 0 -34 13 111.027 277.203 6
 0 -34 14 -60.0716 235.703 6
 0 -36 0 140816 2920.47 5
 0 -36 1 26940.7 1343.09 5
 0 -36 -1 27974.6 1362.54 5
 0 -36 2 80171.3 2234.59 5
 0 -36 3 -73.7855 333.768 5
 0 -36 4 36501.1 1614.02 6
 0 -36 4 36263 1578.14 5
 0 -36 5 2037.86 484.076 5
 0 -36 5 1576.57 450.036 6
 0 -36 6 18619.4 1218.97 6
 0 -36 7 500.525 355.448 6
 0 -36 8 21971.8 1336.76 6
 0 -36 9 11847.4 997.663 6
 0 -36 10 57573.3 2016.31 6
 0 -36 11 6913.42 721.906 6
 0 -36 12 4931.39 579.468 6
 0 -36 13 -473.67 309.274 6
 0 -38 0 100371 2469.33 5
 0 -38 -1 9273.15 863.106 5
 0 -38 1 9936.16 854.726 5
 0 -38 2 649.488 404.776 5
 0 -38 -2 1086.16 447.786 5
 0 -38 -3 2282.37 555.356 5
 0 -38 3 1937.96 476.8 5
 0 -38 4 37428.5 1570.6 5
 0 -38 5 4192.36 627.107 5
 0 -38 6 6104.84 734.691 6
 0 -38 7 96.1767 335.074 6
 0 -38 8 5814.36 692.536 6
 0 -38 9 4083.92 604.21 6
 0 -38 10 15122.7 1034.57 6
 0 -38 -11 554.811 278.928 5
 0 -38 11 332.523 289.079 6
 0 -40 0 65810.2 2002.91 5
 0 -40 -1 788.377 404.625 5
 0 -40 1 332.723 349.134 5
 0 -40 2 5854.08 660.901 5
 0 -40 -2 6090.05 704.685 5
 0 -40 -3 2151.23 536.7 5
 0 -40 3 1132.24 414.784 5
 0 -40 -4 67605.1 2070.72 5
 0 -40 4 58825.7 1929.27 5
 0 -40 -5 3421.43 634.379 5
 0 -40 -6 44078.3 1678.62 5
 0 -40 -7 484.323 405.57 5
 0 -40 -8 4124.23 575.419 5
 0 -40 -9 312.932 312.986 5
 0 -40 -10 2029.22 377.557 5
 0 -42 0 6604.02 700.6 5
 0 -42 -1 378.871 353.785 5
 0 -42 1 -150.022 361.776 5
 0 -42 2 2627.11 469.461 5
 0 -42 -2 3448.89 557.489 5
 0 -42 3 723.868 375.416 5
 0 -42 -3 1498.83 472.564 5
 0 -42 -4 69951.9 2031.33 5
 0 -42 4 53395.7 1737.9 5
 0 -42 -5 3314.93 605.707 5
 0 -42 -6 50379.2 1693.26 5
 0 -42 -7 347.199 325.121 5
 0 -42 -8 1114.66 351.035 5
 0 -42 -9 128.744 248.278 5
 0 -44 0 23397.8 1163.07 5
 0 -44 1 171.984 279.498 5
 0 -44 -1 493.271 345.495 5
 0 -44 -2 494.089 323.985 5
 0 -44 2 338.24 287.144 5
 0 -44 -3 1527.91 422.494 5
 0 -44 3 974.737 360.367 5
 0 -44 -4 40305.9 1482.01 5
 0 -44 -5 4091.3 560.017 5
 0 -44 -6 35363.4 1340.02 5
 0 -44 -7 815.971 329.057 5
 0 -44 -8 340.434 252.349 5
 0 -46 0 25090.7 1116.83 5
 0 -46 1 2161.21 409.185 5
 0 -46 -1 2421.21 441.965 5
 0 -46 -2 2513.47 430.186 5
 0 -46 2 2072.16 381.84 5
 0 -46 -3 291.793 279.709 5
 0 -46 -4 14605.7 875.189 5
 0 -46 -5 2946.81 449.081 5
 0 -46 -6 18914.7 890.862 5
 0 -48 0 28322.6 1080.21 5
 0 -48 -1 5636.82 525.987 5
 0 -48 -2 11858.1 708.467 5
 -1 1 1 999999 2928.81 1
 -1 -1 2 514.964 83.2 2
 -1 -1 2 467.69 147.612 1
 1 -1 2 442.119 131.742 1
 -1 1 2 504.638 169.267 1
 -1 -1 3 5144.8 241.686 2
 1 -1 3 4721.93 350.501 1
 -1 -1 3 4151.04 378.655 1
 -1 1 3 4340.38 407.29 1
 -1 -1 4 3867.3 449.377 1
 -1 -1 4 3745.74 268.364 2
 1 -1 4 4103.93 298.674 2
 1 -1 4 4681.39 421.051 1
 1 -1 5 63358.4 1122.54 2
 -1 -1 5 62892.6 1035.7 2
 -1 -1 5 63150.6 1602.27 1
 -1 1 5 61543.1 1544.9 1
 -1 1 6 699.637 367.005 1
 -1 1 6 463.348 201.146 2
 1 -1 6 462.09 219.831 2
 -1 -1 6 627.036 196.86 2
 -1 -1 6 380.884 333.005 1
 -1 1 7 57624.4 1243.45 2
 1 1 7 58581.5 1344.12 2
 -1 -1 7 55484.8 1772.75 1
 1 -1 7 58535.1 1293.07 2
 -1 -1 7 58688 1231.57 2
 1 1 8 1965.25 338.298 2
 -1 1 8 2347.06 328.741 2
 -1 -1 8 2078.28 318.324 2
 1 -1 8 2105.46 335.707 2
 1 1 9 249163 3143.09 2
 1 -1 9 253890 3122.75 2
 -1 -1 9 247332 2955.13 2
 -1 1 9 243779 2942.74 2
 -1 1 10 1369.2 329.749 2
 1 1 10 1366 354.406 2
 1 -1 10 1493.33 372.451 2
 -1 -1 10 1360.42 331.883 2
 -1 1 11 113689 2319.53 2
 1 -1 11 119818 2515.38 2
 1 1 11 117683 2464.51 2
 1 1 12 391.497 317.505 2
 1 -1 12 1136.72 561.155 4
 -1 1 12 232.992 243.871 2
 1 -1 13 10363.7 1086.03 4
 -1 -1 13 9266.29 1024.9 4
 1 -1 14 2.34017 518.669 4
 -1 1 14 231.56 487.013 4
 1 1 14 1549.85 671.443 4
 -1 -1 14 130.957 491.983 4
 -1 1 15 725.339 532.509 4
 1 -1 15 -814.349 666.775 4
 -1 -1 15 -549.394 606.098 4
 1 1 15 553.432 487.963 4
 1 -1 16 -716.155 567.716 4
 -1 1 16 -592.973 595.468 4
 -1 -1 16 -238.421 534.095 4
 1 1 16 -162.641 538.984 4
 -1 1 17 9347.44 1113.09 4
 1 1 17 8899.33 1145.91 4
 1 -1 17 8837.29 1091.46 4
 -1 -1 17 8384.08 1039.23 4
 -1 -1 18 -84.8344 416.041 4
 1 -1 18 -112.295 439.894 4
 1 1 18 81.9099 444.158 4
 -1 1 18 -44.7679 414.461 4
 1 -1 19 14219.4 1158.56 4
 -1 1 19 12768.1 1075.93 4
 -1 -1 19 11018.8 997.274 4
 1 1 19 15227.9 1202.22 4
 -1 -3 0 27571.2 551.691 1
 -1 -3 1 572312 2318.48 1
 1 -3 1 559341 1607.19 1
 1 -3 2 6272.12 293.531 1
 -1 -3 2 5302.93 302.212 1
 1 -3 3 16995 629.2 1
 -1 -3 3 16822.5 432.706 2
 -1 -3 3 16732.5 606.467 1
 -1 -3 4 11881.7 645.932 1
 1 -3 4 12660.2 661.856 1
 -1 -3 4 11833.1 439.735 2
 1 -3 5 251583 3013.4 1
 -1 -3 5 244741 2052.68 2
 -1 -3 6 5155.76 382.327 2
 1 -3 6 4693.47 379.566 2
 -1 -3 6 4970.01 584.54 1
 1 -3 6 5668.33 555.268 1
 -1 -3 7 6722.96 703.019 1
 1 -3 7 7948.19 513.039 2
 -1 -3 7 7930.62 488.582 2
 -1 -3 8 15789.4 732.896 2
 -1 3 8 15242.3 738.944 2
 1 -3 8 15499.7 755.211 2
 1 3 8 13930.5 758.86 2
 -1 3 9 196046 2701.34 2
 1 3 9 201973 2890.55 2
 -1 -3 9 199853 2746.54 2
 -1 3 10 3401.77 437.667 2
 1 3 10 4213.02 512.831 2
 -1 -3 10 3462.16 587.181 6
 1 -3 10 3494.91 475.79 2
 -1 3 11 34587.7 1294.36 2
 1 3 11 35753.1 1391.82 2
 -1 -3 11 37473.7 1742.93 4
 1 -3 11 38485 1732.57 4
 -1 3 12 -10.1837 246.721 2
 1 3 12 6.98779 247.549 2
 -1 -3 12 792.933 502.967 4
 -1 -3 12 -141.048 383.775 6
 1 -3 12 642.515 504.039 4
 1 -3 13 511.603 434.027 4
 -1 -3 13 643.093 544.173 4
 1 3 13 44.751 265.403 2
 -1 -3 14 -1067.15 672.582 4
 1 -3 14 -76.3454 567.683 4
 1 3 15 11901.4 1242.98 4
 1 -3 15 9675.56 1123.04 4
 -1 3 15 11339 1229.85 4
 -1 -3 15 9908.42 1147.3 4
 1 3 16 -577.705 594.424 4
 -1 -3 16 -240.428 502.619 4
 -1 3 16 317.653 513.606 4
 1 -3 16 144.312 480.593 4
 1 3 17 5718.72 946.026 4
 1 -3 17 5117.21 842.353 4
 -1 -3 17 5072.44 843.414 4
 -1 3 17 5324.42 904.135 4
 1 3 18 1239.45 558.848 4
 -1 -3 18 1127.45 492.562 4
 -1 3 18 991.562 520.226 4
 1 -3 18 738.563 473.267 4
 -1 3 19 8458.67 916.678 4
 -1 -3 19 6797.18 791.055 4
 1 3 19 9504.09 1010.94 4
 1 -3 19 9018 928.742 4
 -1 -5 0 23387.4 632.451 1
 1 -5 1 65248.8 707.472 1
 -1 -5 1 62777.1 925.627 1
 -1 -5 2 2153.95 259.204 1
 1 -5 2 2957.91 211.145 1
 -1 -5 3 35946.6 853.745 1
 1 -5 3 38120.3 849.736 1
 1 -5 4 13764.7 707.821 1
 -1 -5 4 16751.5 728.36 1
 1 -5 5 164193 2499.11 1
 -1 -5 5 157340 2393.61 1
 1 -5 5 158862 1816.38 2
 1 -5 6 29925.4 889.134 2
 1 -5 6 31226.3 1249.98 1
 -1 -5 7 2353.46 510.55 1
 1 -5 7 2429.9 346.683 2
 1 -5 7 2891.46 501.682 1
 1 -5 8 16317.2 787.856 2
 -1 -5 8 15951.4 1069.73 1
 1 -5 9 102657 2532.81 4
 -1 5 9 102162 2047.63 2
 -1 -5 10 7686.84 800.047 6
 1 -5 10 7266.13 824.178 4
 -1 -5 10 6640.52 752.591 4
 1 -5 10 5282.87 645.956 6
 -1 5 10 6585.29 573.576 2
 1 5 10 6251.27 600.513 2
 1 -5 11 566.576 356.321 6
 -1 -5 11 1210.46 484.282 6
 1 -5 11 1393.02 540.03 4
 1 5 11 450.322 275.346 2
 -1 -5 11 1198.53 503.003 4
 -1 5 11 628.189 261.221 2
 1 -5 12 893.385 352.712 6
 1 -5 12 1276.93 507.352 4
 -1 -5 12 1059.91 530.259 4
 -1 -5 12 1084.21 471.21 6
 -1 5 12 1316.2 358.66 2
 1 5 12 1250.39 381.091 2
 -1 -5 13 11894.2 1014.19 6
 1 5 13 10586.4 871.662 2
 1 -5 13 11612.9 1187.95 4
 -1 -5 13 12714 1203.31 4
 1 -5 14 4946.39 869.298 4
 -1 -5 14 5619.41 897.73 4
 -1 -5 14 3530.87 592.581 6
 -1 -5 15 43448 2222.2 4
 1 -5 15 40182.2 2204.45 4
 -1 -5 16 464.712 453.255 4
 -1 5 16 1568.23 704.472 4
 1 -5 16 488.28 482.795 4
 1 5 16 1270.72 693.783 4
 1 -5 17 20.4878 435.904 4
 -1 -5 17 -56.7423 406.102 4
 1 5 17 -186.108 570.842 4
 -1 5 17 -328.793 568.318 4
 -1 5 18 555.667 489.904 4
 1 -5 18 267.823 410.114 4
 1 5 18 596.34 548.797 4
 -1 -5 18 314.326 402.584 4
 -1 5 19 7718.91 884.427 4
 1 5 19 7658.08 941.979 4
 -1 -7 0 7728.73 446.898 1
 -1 -7 1 607.283 193.614 1
 1 -7 1 703.135 161.39 1
 -1 -7 2 62258.3 1098.74 1
 1 -7 2 59842.2 886.715 1
 -1 -7 3 105550 1465.72 1
 1 -7 3 104139 1404.43 1
 -1 -7 4 68144.4 1433.02 1
 1 -7 4 61484.8 1354.52 1
 -1 -7 5 142423 2284.52 1
 1 -7 5 134597 2229.81 1
 -1 -7 6 60686.8 1746.55 1
 1 -7 6 63105.2 1733.26 1
 1 -7 7 62363.5 1855.59 1
 -1 -7 7 62446.5 1939.93 1
 -1 -7 8 2316.71 500.161 1
 1 -7 8 2960.33 497.636 1
 -1 -7 9 11703.8 908.997 6
 1 -7 9 8760.17 840.996 4
 -1 -7 9 11515.3 958.164 1
 -1 7 10 3694.23 466.539 2
 1 -7 10 3220.42 582.941 4
 1 -7 10 3602.17 549.79 6
 1 7 10 3343.21 485.44 2
 -1 -7 10 3830.22 617.128 6
 -1 -7 10 2626.68 522.416 4
 -1 -7 11 5025.79 756.214 4
 1 -7 11 4059.25 723.637 4
 1 7 11 4699.69 579.325 2
 -1 -7 11 5461.44 730.346 6
 -1 7 11 4697.83 539.432 2
 1 -7 11 4774.16 647.817 6
 -1 -7 12 7754.05 844.174 6
 -1 -7 12 7684.84 929.501 4
 -1 7 12 6447.6 643.494 2
 1 -7 12 7398.24 930.933 4
 1 -7 12 6883.03 727.785 6
 1 7 12 7729.05 745.562 2
 -1 -7 13 40948.4 2078.92 4
 1 -7 13 39956.6 1701.34 6
 1 -7 13 42789.3 2123.63 4
 -1 -7 13 40931.3 1798.26 6
 1 -7 14 22265.9 1610.05 4
 -1 -7 14 23773.9 1642.69 4
 -1 -7 14 21372.3 1307.16 6
 -1 -7 15 53334.4 2420.48 4
 1 -7 15 53088.5 2474.17 4
 -1 -7 16 4914.18 834.816 4
 -1 7 16 6795.13 1036.27 4
 1 -7 16 4997.5 841.96 4
 1 7 16 7445.99 1096.92 4
 1 -7 17 309.871 426.861 4
 -1 7 17 1424.48 645.765 4
 1 7 17 419.171 517.96 4
 -1 -7 17 354.6 415.391 4
 -1 -7 18 394.072 397.347 4
 1 -7 18 560.756 432.93 4
 1 7 18 366.634 497.979 4
 -1 7 18 289.804 506.246 4
 1 7 19 518.411 440.269 4
 -1 7 19 877.515 450.521 4
 1 -9 0 36472.2 937.056 1
 -1 -9 0 37476.3 1042.95 1
 1 -9 1 18023.2 575.341 1
 -1 -9 1 17219.3 654.296 1
 1 -9 2 5237.67 330.66 1
 -1 -9 2 5067.67 392.389 1
 1 -9 3 73239.7 1231.96 1
 -1 -9 3 78211.3 1407.28 1
 1 -9 4 134310 1872.26 1
 -1 -9 4 122478 1863.92 1
 -1 -9 5 177122 2513.77 1
 1 -9 5 178480 2479.06 1
 1 -9 6 149061 2727.06 1
 -1 -9 6 155725 2627.21 1
 1 -9 7 162897 3045.11 1
 -1 -9 7 164405 3023.87 1
 -1 -9 8 4550.01 634.005 1
 1 -9 8 4605.9 604.759 1
 1 -9 9 3828.53 571.888 1
 -1 -9 9 3195.15 598.548 1
 -1 -9 9 3463.66 571.589 6
 1 -9 9 3265.01 558.003 4
 1 -9 9 3186.39 510.47 6
 -1 -9 9 2483.86 497.072 4
 1 -9 10 9052.4 827.864 6
 -1 -9 10 10283.3 962.971 1
 -1 -9 10 8332.25 849.002 4
 1 -9 10 8978.51 905.155 4
 -1 -9 10 10079.6 921.073 6
 -1 -9 11 4870.72 726.997 6
 -1 9 11 3570.58 510.865 2
 1 -9 11 3734.75 651.465 4
 1 9 11 4002.72 569.304 2
 1 -9 11 3938.75 585.485 6
 -1 -9 11 4038.41 693.959 4
 -1 -9 12 4069.45 653.567 6
 1 -9 12 4161.75 717.25 4
 1 -9 12 3477.14 551.099 6
 1 9 12 4493.33 620.055 2
 -1 -9 12 3927.13 706.585 4
 -1 9 12 3672.52 513.362 2
 1 -9 13 35770.2 1628.43 6
 -1 -9 13 35914.8 1906.86 4
 1 -9 13 35221.5 1922.93 4
 -1 -9 13 32132.8 1616.47 6
 1 -9 14 33228.3 1560.38 6
 -1 -9 14 30818.7 1581.4 6
 1 -9 14 33630 1972.64 4
 -1 -9 14 33970.6 1933.33 4
 -1 -9 15 50204.5 2345.56 4
 -1 -9 15 50610 1936.6 6
 1 -9 15 51045.9 2374.29 4
 -1 -9 16 7806.98 985.653 4
 1 -9 16 7932.14 1025.79 4
 1 9 17 1431.98 641.417 4
 -1 -9 17 247.837 447.223 4
 1 -9 17 356.469 433.385 4
 -1 9 17 1270.21 708.258 4
 1 9 18 53.4214 510.843 4
 -1 9 18 -903.76 633.816 4
 -1 9 19 110.894 376.5 4
 1 9 19 -60.4467 411.229 4
 1 -11 0 92302.7 1656.52 1
 -1 -11 0 92407.7 1772.25 1
 -1 -11 1 72934.2 1454.52 1
 1 -11 1 71429.7 1282.47 1
 1 -11 2 25091.9 771.027 1
 -1 -11 2 25941.3 904.584 1
 1 -11 3 15274.8 605.511 1
 -1 -11 3 16039.7 707.076 1
 1 -11 4 71572.3 1403.64 1
 -1 -11 4 72999.9 1480.21 1
 -1 -11 5 173727 2558.32 1
 1 -11 5 162604 2382.29 1
 -1 -11 6 177233 2874.44 1
 1 -11 6 180867 2789.55 1
 1 -11 7 110686 2499.45 1
 -1 -11 7 124918 2613.34 1
 -1 -11 8 4178.49 634.652 1
 1 -11 8 4511.81 587.284 6
 1 -11 8 3718.35 612.345 1
 -1 -11 8 4843.42 657.746 6
 -1 -11 9 30483 1450.91 4
 1 -11 9 30491.2 1510.35 4
 1 -11 9 32847.9 1526.43 1
 -1 -11 9 36375.1 1718.25 1
 1 -11 9 34660.5 1507.88 6
 -1 -11 9 35326.3 1593.64 6
 -1 -11 10 19362.3 1213.78 6
 -1 -11 10 19487.4 1302.9 1
 -1 -11 10 16993.2 1168 4
 1 -11 10 19047.9 1147.9 6
 1 -11 10 17386 1231.8 4
 -1 11 11 1840.35 402.459 2
 1 -11 11 1469.59 496.862 4
 -1 -11 11 1654.35 514.476 6
 1 -11 11 1358.82 429.927 6
 -1 -11 11 1644.51 512.127 4
 -1 -11 12 2131.44 597.685 6
 1 -11 12 1287.93 505.491 4
 -1 -11 12 1787.1 527.47 4
 1 11 12 1284.23 397.237 2
 1 -11 12 2247.75 546.146 6
 -1 -11 13 2742.3 542.325 6
 1 -11 13 4026.49 765.942 4
 -1 -11 13 4139.91 758.13 4
 1 -11 13 4231.71 692.5 6
 1 11 13 2544.54 498.661 2
 -1 -11 14 30370.3 1564.02 6
 1 -11 14 30108 1502.62 6
 1 -11 14 32098.2 1876.2 4
 -1 -11 14 32326.1 1864.89 4
 1 -11 15 19451.4 1518.89 4
 -1 -11 15 20319.9 1513.2 4
 -1 -11 15 19833.6 1268.09 6
 1 -11 15 20457 1232.42 6
 -1 -11 16 3412.67 725.018 4
 -1 -11 16 3637.6 584.752 6
 1 -11 16 3796.65 771.836 4
 -1 11 17 2332.6 760.064 4
 1 11 17 2621.51 784.108 4
 1 11 18 62.3817 533.362 4
 -1 11 18 -294.395 518.84 4
 1 11 19 -317.744 455.252 4
 -1 11 19 -260.587 566.376 4
 -1 -13 0 289669 3391.14 1
 1 -13 0 305616 3280.7 1
 1 -13 1 63132.5 1338.01 1
 -1 -13 -1 62628.7 1597.55 1
 1 -13 2 10676.9 541.468 1
 -1 -13 2 11009.5 631.722 1
 -1 -13 3 16503.3 765.301 1
 1 -13 3 13785 620.917 1
 -1 -13 4 32412.4 1046.72 1
 1 -13 4 28617.3 923.297 1
 -1 -13 5 73937.7 1737.04 1
 1 -13 5 71548.2 1598.56 1
 -1 -13 6 180055 2950.9 1
 1 -13 6 181841 2839.89 1
 -1 -13 7 15694.5 981.233 1
 1 -13 7 16143.8 961.242 1
 1 -13 8 27827.4 1303.22 6
 -1 -13 8 27783.7 1458.4 1
 1 -13 8 25443.4 1316.77 4
 1 -13 8 27883.1 1397.1 1
 -1 -13 8 28929.5 1390.85 6
 1 -13 9 25237 1334.19 6
 -1 -13 9 22583.5 1274.41 4
 1 -13 9 23943.2 1322.57 1
 -1 -13 9 27817.8 1415.38 6
 -1 -13 9 26150.2 1497.44 1
 1 -13 9 27363.5 1438.02 4
 -1 -13 10 31166.1 1692.51 1
 -1 -13 10 29414.9 1527.35 4
 1 -13 10 31544.5 1620.77 4
 -1 -13 10 33135.4 1557.57 6
 1 -13 10 31569.1 1496.43 6
 1 -13 11 7641.39 812.819 6
 -1 -13 11 7734.86 835.716 6
 -1 -13 11 8925.21 982.139 1
 -1 -13 11 8475.26 918.758 4
 1 -13 11 7638.31 915.401 4
 1 13 12 1226.79 426.199 2
 1 -13 12 2057.58 613.676 4
 -1 -13 12 2367.45 605.444 4
 1 -13 12 2313.85 571.725 6
 -1 -13 12 2622.87 1002.49 6
 1 13 13 1661.34 449.985 2
 -1 -13 13 1965.86 605.575 4
 1 -13 13 1968.22 553.605 4
 -1 -13 13 1046.93 446.13 6
 1 -13 13 2654.71 572.275 6
 1 -13 14 8211.34 1015.33 4
 1 -13 14 8249.71 853.435 6
 -1 -13 14 9458.14 1047.94 4
 -1 -13 14 9708.22 920.95 6
 1 -13 15 4312.12 623.967 6
 -1 -13 15 4285.33 642.926 6
 1 -13 15 4172.32 812.028 4
 -1 -13 15 4505.92 810.867 4
 -1 -13 16 2925.81 546.888 6
 1 -13 16 2769.67 515.338 6
 1 13 17 1129.11 663.941 4
 -1 13 17 1046.87 671.432 4
 1 13 18 1997.51 641.966 4
 -1 13 18 2725.87 691.098 4
 1 13 19 722.095 425.443 4
 1 -15 0 209134 2872.14 1
 -1 -15 0 201549 2934.07 1
 -1 -15 -1 29040.3 1191.96 1
 1 -15 -1 27309 1103.31 1
 -1 -15 1 26852.4 1060.94 1
 1 -15 1 28603.3 1000.58 1
 1 -15 2 29904.5 953.844 1
 -1 -15 2 30525.8 1101.6 1
 1 -15 3 3118.34 387.483 1
 -1 -15 3 3700.57 460.738 1
 1 -15 4 18697.3 771.027 1
 -1 -15 4 19420.1 884.634 1
 -1 -15 5 21872 995.281 1
 1 -15 5 21155.1 918.311 1
 1 -15 6 11893.7 757.037 1
 -1 -15 6 12901.2 855.399 1
 -1 -15 7 2542.74 438.305 1
 1 -15 7 2469.71 429.923 1
 -1 -15 7 2352.67 454.372 6
 1 -15 7 2201.04 408.212 6
 1 -15 -8 52996 1421.8 3
 -1 -15 8 60600.3 2111.07 1
 -1 -15 8 63349.4 2026.85 6
 -1 -15 8 47894.3 1817.73 4
 1 -15 8 59180.9 2011.14 1
 1 -15 8 53101.7 1965.71 4
 -1 -15 -8 52089 1455.48 3
 1 -15 8 60986.3 1925.2 6
 1 -15 9 13468.6 988.758 6
 -1 -15 9 12683.9 1026.13 4
 1 -15 9 14003.1 1088.81 4
 1 -15 9 12057.6 986.042 1
 -1 -15 9 14291.1 1053.79 6
 -1 -15 9 12737.4 1095.21 1
 -1 -15 10 60738 2096.74 6
 -1 -15 10 50973.2 2230.11 1
 1 -15 10 55096.5 1999.56 6
 -1 -15 10 53755.9 2108.7 4
 1 -15 10 56314.6 2224.47 4
 1 -15 10 57878.3 2059.17 1
 -1 -15 11 7616.11 923.705 4
 1 -15 11 8372.85 873.918 6
 1 -15 11 7775.23 919.445 4
 -1 -15 11 7050.87 820.305 6
 -1 -15 11 6682.68 881.826 1
 -1 -15 12 2612.43 574.241 6
 -1 -15 12 3423.81 726.267 4
 1 -15 12 2843.13 674.002 4
 1 -15 12 3576.16 657.31 6
 1 -15 13 60.8466 451.825 4
 -1 -15 13 31.9344 484.952 4
 1 -15 13 990.936 463.18 6
 -1 -15 13 848.612 514.874 6
 1 -15 14 6549.49 764.862 6
 -1 -15 14 6609.63 797.859 6
 1 -15 15 1689.47 445.416 6
 -1 -15 15 1764.3 484.629 6
 1 -15 16 -104.242 315.164 6
 -1 -15 16 135.652 307.823 6
 1 15 17 1343.56 678.728 4
 -1 15 17 2063.07 767.873 4
 -1 -15 17 142.166 273.492 6
 -1 15 18 14316.5 1264.26 4
 1 15 18 11570.8 1184.14 4
 -1 -17 0 220821 3266.58 1
 1 -17 0 222010 3129 1
 1 -17 -1 12882.2 844.385 1
 -1 -17 -1 11394.8 845.399 1
 1 -17 1 11299.9 704.777 1
 -1 -17 1 11917.8 796.415 1
 -1 -17 -2 30767.9 1322.02 1
 1 -17 2 32266.1 1077.51 1
 -1 -17 2 32297.3 1215.04 1
 1 -17 3 2812.78 370.529 1
 -1 -17 3 2733.96 426.712 1
 -1 -17 4 6457.69 633.031 1
 1 -17 4 6817.84 526.607 1
 -1 -17 5 5813.61 590.322 1
 1 -17 5 4957.76 511.729 1
 -1 -17 6 4260.16 540.322 1
 1 -17 6 4276.55 483.651 1
 -1 -17 6 4026.56 551.012 6
 1 -17 6 4477.89 521.952 6
 1 -17 -7 1608.15 323.894 3
 -1 -17 -7 1694.55 341.022 3
 1 -17 7 1336.04 346.663 1
 1 -17 7 1663.11 404.86 6
 -1 -17 7 1479.81 424.267 6
 -1 -17 7 1438.87 403.34 1
 1 -17 -8 78666.9 1828.8 3
 -1 -17 -8 80305.7 1900.63 3
 1 -17 8 77725.1 2303.45 1
 -1 -17 8 81819.6 2342.93 6
 1 -17 8 80576.5 2218.83 6
 -1 -17 8 87112 2545.23 1
 1 -17 9 12886.7 989.446 6
 -1 -17 9 10384.8 1014.45 1
 -1 -17 -9 12729.3 824.909 3
 -1 -17 9 12203.4 987.844 6
 1 -17 10 70213.3 2262.28 6
 -1 -17 10 69967.4 2305.79 6
 -1 -17 11 2021.7 533.796 6
 -1 -17 11 1896.1 571.71 1
 1 -17 11 2749.74 610.059 6
 -1 -17 12 8018.25 913.044 6
 1 -17 12 7992.43 890.156 6
 -1 -17 13 540.084 449.788 6
 1 -17 13 402.298 409.091 6
 1 -17 14 10300.6 924.587 6
 -1 -17 14 10248.9 981.341 6
 -1 -17 15 1052.43 444.015 6
 1 -17 15 854.692 374.101 6
 -1 -17 16 494.124 365.552 6
 1 -17 16 201.821 290.434 6
 -1 -17 17 100.9 283.116 6
 1 17 17 1315.1 646.268 4
 1 17 18 21945.9 1512.77 4
 -1 17 18 22908.2 1514.33 4
 -1 -19 0 283749 3814.66 1
 1 -19 0 284860 3645.65 1
 -1 -19 1 3372.88 510.189 1
 -1 -19 -1 3299.41 560.451 1
 1 -19 -1 2946.25 494.871 1
 1 -19 1 3572.72 472.393 1
 1 -19 -2 1326.07 384.748 1
 -1 -19 2 1809.51 403.277 1
 1 -19 2 1604.22 340.72 1
 -1 -19 -2 1228.1 412.033 1
 1 -19 3 1059.76 276.721 1
 -1 -19 3 1112.62 338.481 1
 -1 -19 4 1700.57 358.662 1
 1 -19 4 1892.73 333.003 1
 1 -19 -5 5087.59 486.361 3
 -1 -19 -5 4479.38 492.028 3
 -1 -19 5 4820.11 562.452 1
 1 -19 5 4737.22 510.492 1
 1 -19 5 5636.71 592.151 6
 -1 -19 5 4736.42 554.24 6
 1 -19 6 18274.5 971.919 1
 1 -19 6 18535.1 1024.06 6
 -1 -19 6 18859.1 1091.34 1
 -1 -19 -6 19493.7 904.126 3
 1 -19 -6 19146.1 877.88 3
 -1 -19 6 18401.8 1056.26 6
 1 -19 -7 29.1813 263.743 3
 -1 -19 -7 -5.88197 267.141 3
 1 -19 7 -56.2627 236.653 1
 -1 -19 7 199.424 343.712 6
 -1 -19 7 -156.425 289.426 1
 1 -19 7 195.642 302.821 6
 -1 -19 -8 61462.2 1722.38 3
 -1 -19 8 57331 2004.54 6
 1 -19 8 57569.5 1943.94 6
 -1 -19 8 56138.9 2120.44 1
 1 -19 -8 61746.4 1681.67 3
 1 -19 9 3709.34 661.085 6
 -1 -19 -9 2805.08 492.486 3
 -1 -19 9 1413 483.257 1
 -1 -19 9 2433.88 550.304 6
 1 -19 10 51757.1 1980.51 6
 -1 -19 10 51417.2 2005.45 6
 1 -19 11 1474.43 518.357 6
 -1 -19 11 1596.27 580.664 6
 1 -19 12 3772.45 671.092 6
 -1 -19 12 4048.4 702.335 6
 1 -19 13 721.541 432.867 6
 -1 -19 13 1008.4 464.197 6
 -1 -19 14 7853.92 852.56 6
 1 -19 14 9078.67 882.183 6
 1 -19 15 1738.88 451.112 6
 -1 -19 15 396.601 364.546 6
 1 -19 16 662.418 343.806 6
 -1 -19 16 700.56 365.742 6
 1 -19 17 250.691 237.026 6
 -1 -19 17 -224.017 281.285 6
 1 19 18 20897.2 1410.1 4
 -1 19 18 18468.2 1290.85 4
 1 -21 0 273343 3779.56 1
 -1 -21 0 270214 3976.88 1
 -1 -21 -1 674.582 377.05 1
 1 -21 -1 691.44 356.958 1
 -1 -21 1 687.201 347.514 1
 1 -21 1 694.251 304.368 1
 1 -21 -2 -7.66527 339.078 1
 -1 -21 -2 104.841 336.916 1
 1 -21 2 237.223 233.314 1
 -1 -21 2 151.476 259.371 1
 1 -21 -3 1872.26 347.853 3
 -1 -21 3 1836.12 429.352 1
 -1 -21 -3 1997.56 372.461 3
 1 -21 -3 2225.73 522.145 1
 -1 -21 -3 2172.74 547.013 1
 1 -21 3 1785.36 357.64 1
 1 -21 4 111582 2169.27 1
 -1 -21 -4 113668 2081.25 3
 1 -21 -4 111644 2056.63 3
 1 -21 4 107015 2316.5 6
 -1 -21 4 117203 2507.76 1
 -1 -21 4 105318 2295.82 6
 1 -21 5 1505.12 417.857 6
 1 -21 5 922.874 300.597 1
 1 -21 -5 1409.56 352.428 3
 -1 -21 5 1469.33 390.196 1
 -1 -21 5 1708.36 428.753 6
 1 -21 5 991.515 341.027 5
 -1 -21 -5 1276.3 342.258 3
 -1 -21 6 53602.7 1803.36 6
 1 -21 -6 52645.7 1488.08 3
 -1 -21 6 53050 1879.87 1
 -1 -21 -6 52042.1 1513.56 3
 1 -21 6 53697.7 1762.16 6
 -1 -21 -7 168.804 272.908 3
 -1 -21 7 841.389 438.355 6
 -1 -21 7 22.841 277.32 1
 1 -21 7 232.942 342.856 6
 1 -21 -7 254.618 273.976 3
 -1 -21 8 6888.08 818.164 1
 -1 -21 8 8829.88 881.441 6
 1 -21 -8 7315.29 656.179 3
 1 -21 8 8175.59 819.797 6
 -1 -21 -8 8092.28 689.503 3
 -1 -21 -9 3863.6 582.208 3
 -1 -21 9 4704.31 757.218 6
 1 -21 9 4674.34 711.609 6
 -1 -21 10 19681.1 1309.61 6
 1 -21 10 19263.8 1267.29 6
 -1 -21 11 372.314 462.585 6
 1 -21 11 709.595 488.321 6
 -1 -21 12 439.744 434 6
 1 -21 12 978.649 460.05 6
 -1 -21 13 826.686 439.46 6
 1 -21 13 752.226 416.207 6
 -1 -21 14 19663.2 1257.76 6
 1 -21 14 19433.5 1229.61 6
 -1 -21 15 344.081 359.32 6
 1 -21 15 120.422 321.486 6
 1 -21 16 5543.9 665.018 6
 -1 -21 16 5634.53 676.933 6
 1 21 17 412.943 505.845 4
 -1 -21 17 136.762 245.638 6
 1 -21 17 -116.01 226.15 6
 -1 -23 0 174624 3368.55 1
 1 -23 0 169825 3168.75 1
 -1 -23 0 150291 2453.73 3
 -1 -23 1 3653.41 565.566 1
 1 -23 -1 3408.55 548.173 1
 1 -23 1 3721.19 517.91 1
 1 -23 -1 2960.15 418.164 3
 -1 -23 -1 3509.76 569.57 1
 -1 -23 -1 3120.26 443.351 3
 1 -23 -2 160.683 250.758 3
 1 -23 2 328.088 277.032 1
 -1 -23 -2 79.9992 353.154 1
 -1 -23 -2 46.431 236.738 3
 1 -23 2 284.757 279.649 5
 -1 -23 2 39.7348 268.715 1
 1 -23 -2 78.3342 302.461 1
 1 -23 2 38.0632 221.254 6
 1 -23 3 3213.76 456.269 1
 -1 -23 -3 2865.3 434.771 3
 -1 -23 3 2829.25 454.488 6
 1 -23 3 2573.28 438.381 6
 -1 -23 3 2844.31 481.086 5
 -1 -23 3 3340.57 531.324 1
 1 -23 -3 3457.88 638.977 1
 1 -23 -3 3207.53 443.733 3
 -1 -23 -3 3727.85 661.116 1
 1 -23 3 3260.06 532.56 5
 -1 -23 4 221842 3360.3 5
 -1 -23 -4 253567 4773.15 1
 -1 -23 4 233998 3538.84 6
 -1 -23 -4 236657 3127.37 3
 1 -23 -4 238943 3085.86 3
 -1 -23 4 252440 3846.1 1
 1 -23 4 244480 3589.55 6
 1 -23 4 243224 3479.86 5
 1 -23 5 7230.89 737.031 6
 -1 -23 5 7257.76 741.362 6
 1 -23 5 7119.74 719.047 5
 -1 -23 5 6441.98 680.948 5
 -1 -23 5 8572.21 784.907 1
 1 -23 -5 7174.21 633.221 3
 -1 -23 -5 6592.02 615.987 3
 -1 -23 -6 123511 2386.67 3
 1 -23 -6 121260 2337.6 3
 1 -23 6 124178 2773.76 6
 -1 -23 6 120027 2935.79 1
 -1 -23 6 127571 2835.94 6
 1 -23 7 1378.56 472.35 6
 -1 -23 7 1264.2 468.34 6
 -1 -23 -7 1154.19 393.276 3
 1 -23 -7 1275.41 382.606 3
 1 -23 8 1339.6 503.243 6
 -1 -23 8 1473.54 507.745 6
 1 -23 -8 921.266 361.018 3
 -1 -23 -8 670.238 326.095 3
 -1 -23 -9 3909.58 596.542 3
 1 -23 9 4588.04 739.498 6
 -1 -23 9 4069.18 723.36 6
 1 -23 10 9482.51 944.563 6
 -1 -23 10 9329.17 976.686 6
 -1 -23 11 3167.21 673.173 6
 1 -23 11 3371.23 675.667 6
 -1 -23 12 1542.16 514.985 6
 1 -23 12 1521.3 504.412 6
 1 -23 13 -84.6914 383.87 6
 -1 -23 13 509.506 433.165 6
 -1 -23 14 36044.3 1653.96 6
 1 -23 14 34420.2 1642.32 6
 1 -23 15 1712.85 457.982 6
 -1 -23 15 1627.73 466.665 6
 1 -23 16 10677.7 828.226 6
 -1 -23 16 11222.8 863.559 6
 -1 -23 17 143.774 216.454 6
 1 23 17 642.132 478.119 4
 -1 -25 0 54828.3 1987.65 1
 1 -25 0 49592.7 1453.76 3
 1 -25 0 53337.9 1830.86 1
 -1 -25 0 50729.6 1479.9 3
 -1 -25 1 2173.14 384.206 3
 1 -25 -1 2376.87 473.636 1
 1 -25 1 1934.24 362.704 3
 -1 -25 -1 2575.86 426.979 3
 -1 -25 1 2480 484.941 1
 1 -25 -1 1804.33 369.808 3
 -1 -25 -1 1989.53 496.743 1
 1 -25 1 1748.94 381.008 6
 1 -25 1 2317.59 437.767 1
 -1 -25 2 9731.16 857.407 1
 -1 -25 2 7627.86 595.362 3
 1 -25 2 6992.89 565.088 3
 1 -25 -2 9286.08 885.507 1
 -1 -25 2 7223.83 643.02 6
 1 -25 2 9132.93 716.274 5
 1 -25 -2 8790.35 644.913 3
 -1 -25 -2 9310.97 678.101 3
 1 -25 2 8364.21 706.902 6
 -1 -25 -2 9848.38 932.442 1
 1 -25 2 8692.42 722.548 1
 -1 -25 -3 7824.69 650.942 3
 1 -25 -3 7248.7 615.522 3
 -1 -25 -3 8691.75 968.948 1
 -1 -25 3 7352.45 693.192 6
 1 -25 3 8313.36 743.221 5
 1 -25 3 8322.35 723.047 6
 -1 -25 3 8615.43 813.308 1
 1 -25 -3 8080.63 912.712 1
 -1 -25 3 8385.98 732.818 5
 1 -25 -4 177027 2764.21 3
 1 -25 4 183326 3223.44 6
 -1 -25 -4 180723 4283.82 1
 -1 -25 -4 176740 2823.82 3
 -1 -25 4 177070 3135.89 5
 1 -25 -4 187086 4223.69 1
 -1 -25 4 178496 3228.23 6
 -1 -25 4 182619 3433.14 1
 1 -25 4 190116 3218.89 5
 1 -25 5 27639.2 1356.74 5
 -1 -25 5 26559 1377.01 1
 -1 -25 5 23595.8 1241.89 5
 1 -25 -5 27758.4 1172.54 3
 -1 -25 -5 26473.8 1154.06 3
 1 -25 5 28673.8 1370.42 6
 -1 -25 -5 26800.7 1784.17 1
 -1 -25 5 28809.2 1378.68 6
 1 -25 -5 28311.8 1771.01 1
 -1 -25 -6 179895 2969.05 3
 1 -25 6 187437 3499.74 6
 1 -25 -6 183896 2946.6 3
 -1 -25 6 186092 3534.24 6
 1 -25 7 7409.75 814.643 6
 -1 -25 7 7751.79 841.54 6
 1 -25 -7 5901.69 621.516 3
 -1 -25 -7 5729.88 643.097 3
 -1 -25 8 8078.27 882.465 6
 1 -25 8 7317.2 815.351 6
 -1 -25 -8 6813.55 684.532 3
 -1 -25 -9 373.267 369.423 3
 1 -25 9 821.893 495.861 6
 -1 -25 9 1244.78 517.059 6
 -1 -25 10 435.55 488.946 6
 1 -25 10 270.737 418.248 6
 1 -25 11 2553.26 587.378 6
 -1 -25 11 2425.87 593.243 6
 1 -25 12 18536 1249.92 6
 -1 -25 12 17715.6 1238.33 6
 -1 -25 13 2211.56 565.454 6
 1 -25 13 2399.89 547.334 6
 -1 -25 14 30322.8 1505.31 6
 1 -25 14 30194.9 1497.98 6
 1 -25 15 4708.21 633.059 6
 -1 -25 15 4765.34 630.691 6
 -1 -25 16 15078.3 943.877 6
 1 -25 16 13119.5 859.62 6
 1 25 17 1075.7 450.671 4
 -1 -27 0 30674.6 1209.89 3
 1 -27 0 29125.7 1413.12 1
 -1 -27 0 30980.9 1588.1 1
 1 -27 0 29797.8 1173.83 3
 1 -27 -1 1513.05 401.642 1
 1 -27 -1 1433.05 351.154 3
 -1 -27 1 1399.11 419.706 1
 -1 -27 -1 1331.09 435.098 1
 1 -27 1 974.248 315.382 6
 -1 -27 -1 1356.35 368.071 3
 -1 -27 1 1337.2 352.307 3
 1 -27 1 1337.92 340.795 3
 -1 -27 2 2225.98 472.829 1
 1 -27 -2 2135.84 467.622 1
 -1 -27 -2 2073.92 406.33 3
 1 -27 2 1944.81 409.24 6
 -1 -27 -2 2579.78 524.669 1
 1 -27 2 2402.77 465.408 5
 -1 -27 2 1769.79 380.793 6
 -1 -27 2 2052.89 378.521 3
 1 -27 -2 2005 385.598 3
 1 -27 2 1598.07 337.68 3
 1 -27 -3 10789.9 745.387 3
 -1 -27 3 11249.9 837.939 5
 1 -27 -3 11289.1 1039.89 1
 1 -27 3 11900.5 878.458 5
 -1 -27 3 10176.6 809.02 6
 -1 -27 -3 11906.8 1114.81 1
 1 -27 3 10690.1 847.851 6
 -1 -27 -3 10162.4 751.793 3
 -1 -27 3 10269.2 911.141 1
 1 -27 -4 88297.5 2029.42 3
 -1 -27 -4 88830.9 3139.21 1
 1 -27 -4 86692.5 3059.32 1
 -1 -27 4 91238.8 2372.34 6
 -1 -27 -4 88627.1 2071.36 3
 1 -27 4 91256.6 2383.54 6
 -1 -27 4 94470.9 2348.89 5
 1 -27 4 95042.4 2361.35 5
 1 -27 -5 34749 1338.46 3
 -1 -27 -5 36858 2141.67 1
 1 -27 5 36471.9 1586.62 6
 1 -27 -5 35552.8 2067.08 1
 -1 -27 -5 35106.9 1358.5 3
 -1 -27 5 31529.3 1471.86 5
 1 -27 5 36612.5 1570.02 5
 -1 -27 5 35388 1557.7 6
 1 -27 -6 66567.2 2911.71 1
 -1 -27 -6 72152 1952.46 3
 1 -27 6 69847.6 2174.46 5
 -1 -27 6 75085.4 2313.55 6
 1 -27 6 76856.1 2320.14 6
 1 -27 -6 71086.1 1922.43 3
 -1 -27 -6 63407.6 2962.76 1
 1 -27 -7 2167.16 673.695 1
 1 -27 7 3360.49 627.542 6
 -1 -27 -7 2457.81 496.25 3
 -1 -27 -7 2988.51 794.579 1
 -1 -27 7 3411.14 634.241 6
 1 -27 -7 2673.53 478.442 3
 -1 -27 8 4537.6 721.916 6
 -1 -27 -8 2075.14 790.889 1
 1 -27 8 3988.32 685.267 6
 -1 -27 -8 3768.03 558.642 3
 1 -27 9 4199.38 718.593 6
 -1 -27 9 4012.72 702.404 6
 -1 -27 10 5747.91 783.311 6
 1 -27 10 6001.34 805.392 6
 1 -27 11 289.042 422.366 6
 -1 -27 11 526.166 435.677 6
 -1 -27 12 8261.03 892.723 6
 1 -27 12 8028.44 864.582 6
 -1 -27 13 9856.49 917.088 6
 1 -27 13 8486.23 866.109 6
 1 -27 14 36434.4 1607.55 6
 -1 -27 14 35677.1 1593.32 6
 -1 -27 15 6641.34 721.099 6
 1 -27 15 6276.72 663.15 6
 -1 -27 16 6031.12 583.963 6
 1 -27 16 6034.71 572.288 6
 -1 -29 0 35638.8 1719.77 1
 1 -29 0 36932 1346.12 3
 -1 -29 0 35830.4 1342.64 3
 1 -29 -1 12676.3 825.14 3
 -1 -29 -1 13816.9 1130.63 1
 1 -29 1 12764.3 882.037 5
 1 -29 1 12430.1 799.384 3
 -1 -29 1 12703.4 1034.87 1
 -1 -29 -1 13005 837.742 3
 1 -29 1 11247.6 845.165 6
 -1 -29 1 12968.8 834.64 3
 -1 -29 -2 492.924 365.327 1
 -1 -29 2 438.532 297.114 6
 1 -29 -2 513.498 311.051 3
 -1 -29 2 559.776 369.268 5
 1 -29 2 595.134 384.141 5
 1 -29 2 647.95 300.182 6
 -1 -29 2 498.909 280.4 3
 1 -29 2 473.931 261.186 3
 -1 -29 -2 453.838 333.725 3
 1 -29 -3 6370.19 811.546 1
 -1 -29 -3 7105.45 665.919 3
 -1 -29 3 7071.02 711.785 6
 1 -29 -3 7106.18 652.242 3
 1 -29 3 7490.37 740.701 6
 -1 -29 3 7585.86 752.549 5
 1 -29 3 8389.58 781.525 5
 -1 -29 -3 6647.89 871.225 1
 -1 -29 4 25894.8 1332.6 6
 1 -29 4 26844.8 1388.15 6
 -1 -29 4 26223 1309.41 5
 1 -29 4 27067 1359.17 5
 1 -29 -4 25366.5 1160.9 3
 1 -29 -4 23625.5 1580.52 1
 -1 -29 -4 24378.6 1164.75 3
 -1 -29 -4 26562.3 1742.01 1
 1 -29 -5 10262.2 1179.38 1
 1 -29 -5 12418.5 864.752 3
 1 -29 5 11541.5 947.036 5
 -1 -29 -5 12271.9 1309.64 1
 -1 -29 -5 11838.3 842.013 3
 1 -29 5 12262.3 974.567 6
 -1 -29 5 12234.8 970.22 6
 -1 -29 5 11551.8 929.445 5
 1 -29 -6 1437.61 386.65 3
 -1 -29 -6 1443.16 585.101 1
 -1 -29 6 1354.44 476.293 6
 1 -29 6 1495.42 462.447 6
 -1 -29 -6 1337.77 382.665 3
 1 -29 -6 1090.51 499.276 1
 1 -29 6 1228.2 463.937 5
 -1 -29 7 2448.6 559.391 6
 -1 -29 -7 1368.08 643.672 1
 -1 -29 -7 2127.25 484.681 3
 1 -29 -7 1516.48 620.582 1
 1 -29 7 2151.39 519.437 6
 -1 -29 -8 4081.07 925.881 1
 1 -29 8 4947.18 744.54 6
 1 -29 -8 2742.32 763.611 1
 -1 -29 8 5287.95 766.786 6
 -1 -29 -8 4189.64 581.038 3
 -1 -29 9 17658.3 1281.13 6
 1 -29 9 17411.5 1274.04 6
 1 -29 10 27497.8 1557.26 6
 -1 -29 10 27897.2 1564.05 6
 -1 -29 11 2309.43 590.305 6
 1 -29 11 2798.28 614.753 6
 1 -29 12 59.8481 387.677 6
 -1 -29 12 371.919 384.317 6
 1 -29 13 5112.29 687.667 6
 -1 -29 13 4805.81 676.502 6
 -1 -29 14 21329.5 1218.22 6
 1 -29 14 19832.6 1127.31 6
 1 -29 15 6033 608.786 6
 -1 -29 15 6323.51 628.219 6
 1 -31 0 80372.1 2016.47 3
 -1 -31 0 82479 2081.05 3
 -1 -31 -1 40049.5 1482.23 3
 -1 -31 1 39285.2 1423.86 3
 1 -31 -1 39209.7 1432.86 3
 1 -31 1 40096.6 1512.68 5
 1 -31 1 40175.2 1405.08 3
 1 -31 2 12051.1 913.844 6
 1 -31 -2 13354 874.294 3
 1 -31 2 13631.8 945.585 5
 -1 -31 -2 11549.5 1095.66 1
 -1 -31 2 11448 786.058 3
 -1 -31 2 13410 923.375 5
 -1 -31 -2 13055.8 891.648 3
 1 -31 3 16.3092 346.119 5
 -1 -31 -3 -598.565 427.557 3
 -1 -31 3 69.4431 341.244 5
 1 -31 -3 -111.476 345.388 3
 1 -31 3 228.885 316.387 6
 -1 -31 3 104.292 289.428 6
 -1 -31 -3 -177.13 336.522 1
 -1 -31 -4 -23.988 385.278 3
 1 -31 -4 190.052 320.241 3
 -1 -31 4 6.88239 380.133 6
 1 -31 4 -392.245 415.253 5
 -1 -31 -4 446.836 385.512 1
 -1 -31 4 585.019 439.95 5
 1 -31 4 314.075 340.894 6
 1 -31 5 1072.84 440.829 5
 -1 -31 5 1115.32 422.955 5
 -1 -31 -5 943.483 389.258 3
 1 -31 -5 866.808 394.41 3
 -1 -31 5 1060.2 419.741 6
 1 -31 5 1185.23 471.877 6
 -1 -31 -5 660.214 456.473 1
 1 -31 6 7264.36 799.574 5
 -1 -31 6 7728.83 847.966 6
 1 -31 6 7326.85 847.944 6
 -1 -31 -6 7430.38 729.75 3
 -1 -31 7 593.09 431.878 6
 -1 -31 -7 350.431 359.942 3
 1 -31 7 433.546 433.747 6
 -1 -31 -7 426.005 485.426 1
 -1 -31 8 22971 1425.93 6
 1 -31 8 23047.9 1446.68 6
 1 -31 9 45559.7 2018.56 6
 -1 -31 9 43003.5 1938.54 6
 -1 -31 10 46827.9 2016.32 6
 1 -31 10 50042.5 2105.64 6
 1 -31 11 18065 1262.66 6
 -1 -31 11 17282.8 1220.44 6
 1 -31 12 2356.04 548.691 6
 -1 -31 12 2237.84 512.387 6
 -1 -31 13 471.487 337.37 6
 1 -31 13 590.606 358.028 6
 -1 -31 14 2759.18 471.803 6
 1 -31 14 2417.87 434.976 6
 1 -31 15 2162.23 374.797 6
 -1 -31 15 2493.63 403.245 6
 1 -33 0 75043 2117.65 5
 1 -33 0 74503.8 1991.61 3
 -1 -33 0 74831.6 2032.75 3
 1 -33 -1 84840.2 2145.56 3
 1 -33 1 80870.6 2191.65 5
 -1 -33 1 82676.7 2080.1 3
 -1 -33 1 80659.5 2176.15 5
 -1 -33 -1 85434.3 2189.15 3
 -1 -33 2 20807.4 1162.22 5
 1 -33 -2 20256 1096.79 3
 -1 -33 -2 19048.4 1085.53 3
 1 -33 2 20640.3 1163 5
 -1 -33 2 18241.3 978.225 3
 -1 -33 3 16629.6 1050.23 6
 -1 -33 3 16621.3 1057.02 5
 1 -33 3 16877.3 1085.04 5
 -1 -33 -3 17075.8 1053.4 3
 1 -33 3 16301.9 1106.18 6
 1 -33 -3 17008.3 1016.91 3
 1 -33 -4 2536.26 483.558 3
 -1 -33 -4 2929.27 536.114 3
 1 -33 4 2312.15 497.426 5
 1 -33 4 3099.25 552.72 6
 -1 -33 4 2636.97 549.363 5
 -1 -33 4 2937.41 523.953 6
 1 -33 5 19946.2 1233.21 5
 -1 -33 5 22384.9 1322.84 6
 -1 -33 5 19947.8 1214.58 5
 1 -33 5 21015 1285.16 6
 -1 -33 -5 22153.5 1177.24 3
 -1 -33 -6 8297.34 773.246 3
 1 -33 6 7341.75 818.738 5
 -1 -33 6 8897.5 917.266 6
 1 -33 6 8519.18 884.913 6
 -1 -33 7 186.682 397.737 6
 1 -33 7 532.517 381.968 6
 -1 -33 8 21455.9 1388.01 6
 1 -33 8 22068.6 1388.95 6
 1 -33 9 71772 2448.53 6
 -1 -33 9 74113.8 2529.1 6
 -1 -33 10 40719.3 1875.14 6
 1 -33 10 39589.4 1804.55 6
 1 -33 11 29289.9 1512.51 6
 -1 -33 11 31839 1590.02 6
 -1 -33 12 7104.14 756.687 6
 1 -33 12 6156.76 705.158 6
 1 -33 13 593.319 291.428 6
 -1 -33 13 618.214 326.649 6
 -1 -33 14 -140.886 237.068 6
 1 -33 14 -121.455 263.433 6
 -1 -35 0 40317.6 1517.75 3
 1 -35 0 39285 1581.89 5
 -1 -35 0 40412.7 1589.91 5
 1 -35 1 96819.2 2446.75 5
 -1 -35 -1 100166 2414.1 3
 -1 -35 1 95043.1 2252.44 3
 -1 -35 1 94638.4 2380.45 5
 1 -35 -1 97878 2450.79 5
 -1 -35 -2 27134.3 1310.68 3
 -1 -35 2 26126.6 1296.86 5
 1 -35 2 24708 1273.79 5
 -1 -35 3 9002.58 825.582 5
 -1 -35 -3 9485.01 840.904 3
 1 -35 3 8357.95 821.354 5
 -1 -35 4 2396.27 487.372 6
 -1 -35 4 2940.8 536.168 5
 1 -35 4 2349.3 505.57 5
 1 -35 4 2508.42 517.594 6
 -1 -35 -4 2695.11 522.446 3
 -1 -35 -5 24922.1 1250.06 3
 -1 -35 5 23735.6 1328.98 6
 1 -35 5 23089.6 1311.98 5
 -1 -35 5 22087.2 1250.72 5
 1 -35 5 21988.8 1322.06 6
 -1 -35 6 1719.18 472.076 6
 1 -35 6 1655.33 465.659 6
 1 -35 7 999.563 419.526 6
 -1 -35 7 861.764 412.177 6
 -1 -35 8 10818.7 974.596 6
 1 -35 8 11175.8 993.337 6
 -1 -35 9 58447.5 2119.94 6
 1 -35 9 58774.4 2145.09 6
 1 -35 10 20239.1 1263.44 6
 -1 -35 10 20237.5 1249.85 6
 -1 -35 11 32133.3 1495.25 6
 1 -35 11 31903.9 1496.37 6
 -1 -35 12 3369.72 513.608 6
 1 -35 12 2710.19 479.221 6
 1 -35 13 289.027 241.941 6
 -1 -35 13 351.142 256.845 6
 -1 -37 0 17127.6 1093.25 5
 1 -37 0 18318.9 1117.48 5
 -1 -37 -1 86442.4 2243.37 3
 -1 -37 -1 83282.6 2270.33 5
 -1 -37 1 81397.6 2225.83 5
 1 -37 -1 81747.2 2260.02 5
 1 -37 1 80517.4 2236.27 5
 -1 -37 2 3468.69 555.98 5
 1 -37 -2 3866.93 616.179 5
 1 -37 2 3574.68 585.802 5
 -1 -37 -2 3766.54 560.562 3
 1 -37 3 12716.5 955.616 5
 1 -37 -3 14408.3 1031.53 5
 -1 -37 3 11740.3 915.192 5
 -1 -37 -3 13978.8 965.031 3
 -1 -37 4 3311.55 558.716 5
 1 -37 4 3771.81 593.215 5
 -1 -37 4 3341.37 620.597 6
 1 -37 5 18574.6 1162.09 5
 -1 -37 5 17835.9 1166.33 6
 -1 -37 5 17809.4 1120.47 5
 -1 -37 6 659.425 354.576 6
 1 -37 6 796.8 360.311 6
 -1 -37 7 -24.9321 328.568 6
 1 -37 7 -111.365 380.952 6
 -1 -37 8 2221.61 512.926 6
 1 -37 8 1495.84 454.098 6
 -1 -37 9 32804.8 1525 6
 1 -37 9 32415.5 1565.17 6
 1 -37 10 5566.92 691.909 6
 -1 -37 10 5598.02 679.264 6
 1 -37 11 11109.5 863.147 6
 1 -37 -11 9268.2 682.115 5
 -1 -37 11 10544.1 832.165 6
 -1 -37 12 -76.6168 288.576 6
 -1 -39 0 4883.89 663.898 5
 1 -39 0 5357.41 711.967 5
 -1 -39 1 19842.8 1129.24 5
 -1 -39 -1 21223 1178.24 5
 1 -39 -1 20736.6 1187.91 5
 1 -39 1 20029.7 1150.32 5
 1 -39 -2 238.362 399.998 5
 -1 -39 2 181.698 327.901 5
 1 -39 2 -49.9255 371.936 5
 -1 -39 -2 215.507 371.169 5
 1 -39 3 30398.5 1411.73 5
 1 -39 -3 34895.9 1520.06 5
 -1 -39 3 30724.2 1426.76 5
 -1 -39 -3 34971.3 1521.8 5
 1 -39 4 2917.66 543.061 5
 -1 -39 4 2821.83 523.624 5
 1 -39 -4 3862.48 662.061 5
 1 -39 -5 49377.9 1824.86 5
 1 -39 5 40181.1 1616.36 5
 1 -39 -6 1838.97 524.951 5
 -1 -39 7 958.234 381.965 6
 1 -39 -7 1363.08 453.227 5
 -1 -39 8 72.7227 279.243 6
 1 -39 -8 580.136 371.014 5
 -1 -39 9 11407.8 878.619 6
 1 -39 -9 11961.8 835.829 5
 1 -39 -10 436.918 283.401 5
 -1 -39 10 435.599 284.246 6
 -1 -39 -11 284.831 239.482 5
 1 -39 -11 89.712 211.704 5
 1 -41 0 465.245 382.261 5
 -1 -41 0 647.708 368.659 5
 1 -41 1 1457.96 393.361 5
 1 -41 -1 1886.96 472.163 5
 -1 -41 -1 1942.3 476.074 5
 -1 -41 1 2371.07 494.761 5
 -1 -41 -2 384.869 361.672 5
 -1 -41 2 -115.76 369.509 5
 1 -41 2 9.07213 353.086 5
 1 -41 -2 264.808 366.114 5
 1 -41 3 31187.9 1397.22 5
 -1 -41 3 31394.9 1386.84 5
 -1 -41 -3 36108 1513.29 5
 1 -41 -3 35869.8 1510.16 5
 1 -41 -4 2600.23 591.138 5
 -1 -41 4 1632.03 426.692 5
 1 -41 4 1692.6 464.022 5
 -1 -41 -4 2937.51 582.303 5
 -1 -41 -5 66185.7 2013.67 5
 1 -41 -5 66869.1 2047.31 5
 -1 -41 -6 1744.8 515.482 5
 1 -41 -6 1671.8 497.729 5
 -1 -41 -7 4056.95 585.175 5
 1 -41 -7 4594.19 602.173 5
 -1 -41 -8 40.9384 289.916 5
 1 -41 -8 347.927 332.624 5
 1 -41 -9 1315.07 357.973 5
 -1 -41 -9 1864.07 383.957 5
 -1 -41 -10 132.15 237.834 5
 1 -41 -10 59.8058 219.601 5
 -1 -43 0 194.014 309.207 5
 1 -43 0 -221.838 338.912 5
 1 -43 1 2604.3 502.087 5
 -1 -43 -1 2902.01 500.048 5
 1 -43 -1 2642.2 515.855 5
 -1 -43 1 2068.86 422.461 5
 -1 -43 2 363.597 284.109 5
 -1 -43 -2 657.132 370.031 5
 1 -43 2 691.227 331.055 5
 1 -43 -2 1093.81 396.643 5
 -1 -43 -3 25437.9 1236.53 5
 1 -43 3 23931 1163.99 5
 1 -43 -3 25472.8 1237.16 5
 -1 -43 3 21348.1 1102.83 5
 1 -43 -4 2483.69 525.242 5
 -1 -43 -4 2300.21 514.428 5
 1 -43 -5 61631.1 1854.37 5
 -1 -43 -5 59012.2 1822.27 5
 1 -43 -6 2116.22 467.27 5
 -1 -43 -6 2259.25 481.482 5
 -1 -43 -7 12253.8 804.543 5
 1 -43 -7 12035.1 809.578 5
 1 -43 -8 384.065 276.294 5
 -1 -43 -8 91.5083 262.171 5
 -1 -43 -9 1845.79 339.843 5
 -1 -45 0 2406.97 445.475 5
 1 -45 0 1764.53 417.093 5
 1 -45 1 9149.24 725.513 5
 -1 -45 1 8887.49 707.665 5
 1 -45 -1 9546.3 753.272 5
 -1 -45 -1 9639.06 757.68 5
 -1 -45 -2 1.8553 267.13 5
 -1 -45 2 -42.6201 267.568 5
 1 -45 2 -87.307 251.349 5
 1 -45 -2 -66.274 332.672 5
 -1 -45 -3 8247.47 686.74 5
 1 -45 -3 7769.13 675.838 5
 1 -45 -4 1865.94 431.741 5
 -1 -45 -4 2056.91 438.631 5
 -1 -45 -5 32179.2 1245 5
 1 -45 -5 32014.7 1248.07 5
 1 -45 -6 2965.65 453.206 5
 -1 -45 -6 2709.54 446.396 5
 1 -45 -7 7711.62 602.635 5
 -1 -45 -7 7552.09 600.638 5
 1 -47 0 4755.45 521.7 5
 -1 -47 0 4654.74 498.346 5
 -1 -47 -1 19112 941.401 5
 1 -47 -1 19774.7 963.932 5
 1 -47 1 17204.2 883.83 5
 1 -47 -2 1263.39 336.018 5
 -1 -47 -2 1209.13 337.581 5
 1 -47 -3 -51.5559 252.722 5
 -1 -47 -3 -142.179 255.127 5
 1 -47 -4 822.861 304.586 5
 -1 -47 -4 718.203 269.03 5
 1 -47 -5 12696.2 750.277 5
 -1 -47 -5 13018.5 731.346 5
 -2 0 1 26.8449 74.5114 1
 -2 0 2 130324 1395.21 1
 -2 0 2 135518 782.422 2
 -2 0 3 20.2666 98.2032 2
 -2 0 3 53.6784 212.936 1
 -2 0 4 25065.9 911.43 1
 -2 0 4 23596.5 543.406 2
 -2 0 5 46.6824 153.542 2
 -2 0 5 27.8875 326.433 1
 2 0 6 669.858 267.411 2
 -2 0 6 631.219 187.309 2
 -2 0 6 719.618 357.567 1
 -2 0 7 78.3474 174.493 2
 2 0 7 15.2245 227.585 2
 -2 0 7 60.1651 311.633 1
 2 0 8 253182 2985.94 2
 -2 0 8 248092 2662.98 2
 2 0 9 91.6058 251.534 2
 -2 0 9 204.61 230.926 2
 -2 0 10 148491 2423.68 2
 2 0 10 151779 2667.85 2
 -2 0 11 1070.56 542.696 6
 2 0 11 346.354 312.752 2
 2 0 12 24940.5 1264.91 2
 2 0 13 1068.32 601.927 4
 2 0 14 2246.21 702.359 4
 -2 0 14 1605.45 629.838 4
 2 0 15 -631.911 623.461 4
 -2 0 15 -379.493 544.313 4
 2 0 16 4928.86 887.544 4
 -2 0 16 5813.65 893.234 4
 2 0 17 -243.701 526.897 4
 -2 0 17 48.4849 465.934 4
 -2 0 18 18705.9 1373.01 4
 2 0 18 20751.1 1529.07 4
 -2 0 19 -91.5131 327.35 4
 2 0 19 -11.0241 384.689 4
 -2 -2 0 964292 3180.44 1
 -2 -2 1 3250.49 206.42 1
 -2 2 1 3231.95 205.352 1
 -2 -2 2 58185.5 935.516 1
 -2 2 2 60277.6 1034.53 1
 -2 -2 3 1500.38 262.613 1
 -2 2 3 1453.38 291.341 1
 -2 -2 3 1785.6 157.794 2
 -2 2 4 240928 2721.96 1
 -2 -2 4 241437 1711.69 2
 -2 -2 5 1922.13 242.796 2
 -2 -2 5 2131.06 408.785 1
 -2 2 5 2576.36 424.986 1
 2 -2 5 1998.85 279.319 2
 -2 -2 6 16095.5 947.471 1
 -2 2 6 17479.5 903.48 1
 2 -2 6 16148.3 662.742 2
 -2 -2 6 17084.8 601.881 2
 -2 -2 7 3422.35 550.82 1
 2 -2 7 3561.72 382.682 2
 -2 -2 7 3493.96 336.337 2
 -2 2 7 3524.04 340.949 2
 2 2 8 96567.9 1911.23 2
 2 -2 8 95940.2 1822.87 2
 -2 -2 8 102087 2516.94 1
 -2 -2 8 97613.8 1710.02 2
 -2 2 8 95087.7 1685.74 2
 -2 2 9 3933.93 413.725 2
 -2 -2 9 3942.14 426.51 2
 2 2 9 4111.73 482.204 2
 2 -2 9 4294.31 483.692 2
 2 -2 10 115090 2332.17 2
 2 2 10 111798 2326.86 2
 2 -2 11 925.977 335.157 2
 2 -2 11 2044.08 594.487 4
 -2 2 11 856.122 292.958 2
 2 2 11 753.829 323.93 2
 -2 -2 11 2041.56 546.964 6
 2 2 12 22254.3 1195.32 2
 2 -2 12 24352.9 1527.57 4
 -2 -2 12 20332.2 1332.37 6
 -2 -2 12 24494.8 1504.31 4
 2 -2 13 787.105 567.383 4
 -2 -2 13 473.485 507.369 4
 2 2 13 59.2307 284.219 2
 -2 -2 14 210.785 451.036 4
 2 -2 14 -584.782 606.338 4
 2 2 14 1289.11 640.313 4
 -2 2 15 413.8 531.82 4
 2 -2 15 -552.086 630.986 4
 2 2 15 1023.13 646.836 4
 -2 -2 15 -455.527 561.333 4
 -2 -2 16 -52.3218 460.135 4
 -2 2 16 -153.542 544.229 4
 2 -2 16 10.172 491.234 4
 2 2 16 -222.228 588.24 4
 2 -2 17 212.406 455.778 4
 -2 2 17 159.936 472.821 4
 -2 -2 17 657.818 486.114 4
 2 2 17 257.061 498.219 4
 2 2 18 3775.86 783.815 4
 -2 -2 18 3869.93 688.911 4
 -2 2 18 4299.97 734.106 4
 2 -2 18 4031.16 741.554 4
 -2 2 19 96.225 340.805 4
 2 2 19 355.707 413.486 4
 2 -2 19 452.201 395.112 4
 -2 -4 0 92352.6 1246.04 1
 2 -4 1 16040.2 254.324 1
 -2 -4 1 15199.2 479.836 1
 2 -4 2 419.678 136.334 1
 -2 -4 2 520.53 194.414 1
 2 -4 3 2665.55 301.304 1
 -2 -4 3 2916.76 307.611 1
 2 -4 4 8676.53 590.14 1
 -2 -4 4 10236.3 587.213 1
 2 -4 5 19732.3 655.008 2
 2 -4 5 21599.8 926.569 1
 -2 -4 5 20967 909.411 1
 -2 -4 6 17956.1 964.768 1
 2 -4 6 17380.2 684.438 2
 2 -4 7 5190.33 448.043 2
 -2 -4 7 5222.29 660.479 1
 -2 4 8 112724 1908.28 2
 2 -4 8 115697 2012.09 2
 -2 -4 8 116405 2763.08 1
 2 4 9 6759.58 597.205 2
 2 -4 9 7475.77 607.232 2
 -2 4 9 6683.05 518.182 2
 -2 -4 9 6962.46 808.097 1
 2 -4 9 6491.08 757.133 4
 2 -4 10 45315.8 1509.33 2
 2 4 10 45024 1515.88 2
 2 -4 10 46523.9 1828.9 4
 -2 4 10 41726.6 1294.56 2
 2 -4 11 1259.92 480.777 4
 -2 -4 11 1114.9 484.206 4
 2 4 11 664.451 299.276 2
 -2 -4 11 2129.07 616.264 6
 -2 4 11 575.106 239.09 2
 2 -4 12 1549.29 555.558 4
 2 4 12 822.707 339.052 2
 -2 -4 12 1241.47 532.638 6
 -2 -4 12 1417.36 552.576 4
 -2 -4 13 237.925 458.092 6
 2 4 13 829.857 371.505 2
 2 -4 13 467.648 416.846 4
 -2 -4 13 1.98591 408.488 4
 -2 -4 14 13216.5 1288.51 4
 2 4 14 9558.02 882.655 2
 -2 -4 14 13122.1 1063.73 6
 2 -4 14 13487.2 1289.85 4
 2 -4 15 494.689 492.062 4
 -2 4 15 1697.15 656.397 4
 -2 -4 15 378.057 476.09 4
 2 4 15 2280.82 796.922 4
 2 -4 16 -114.16 500.012 4
 -2 4 16 1170.45 665.673 4
 -2 -4 16 210.077 416.33 4
 2 4 16 164.995 568.392 4
 2 4 17 -362.573 531.945 4
 -2 4 17 -477.566 585.831 4
 -2 -4 17 250.09 416.248 4
 2 -4 17 -599.424 538.176 4
 2 -4 18 10202.2 1076.58 4
 2 4 18 9357.24 1108.11 4
 -2 -4 18 8886.83 941.118 4
 -2 4 18 10052.7 1118.33 4
 2 4 19 519.666 471.593 4
 2 -4 19 1315.3 482.537 4
 -2 4 19 499.596 376.576 4
 -2 -6 0 8782.04 499.928 1
 -2 -6 1 50.2263 174.362 1
 2 -6 1 70.5541 77.663 1
 2 -6 2 155091 1282.36 1
 -2 -6 2 151091 1737.99 1
 2 -6 3 45317.9 951.578 1
 -2 -6 3 43850.2 988.256 1
 2 -6 4 1018.27 293.33 1
 -2 -6 4 1407.84 318.388 1
 -2 -6 5 4864.13 497.48 1
 2 -6 5 5399.81 501.871 1
 2 -6 6 58689.3 1625.95 1
 -2 -6 6 61073.6 1695.19 1
 -2 -6 7 282.007 347.458 1
 2 -6 7 405.524 326.222 1
 -2 -6 8 13314.1 1032.64 1
 -2 6 9 9292.68 622.905 2
 -2 -6 9 10541 970.399 1
 -2 -6 10 3727.73 631.677 4
 -2 -6 10 3466.76 704.992 1
 -2 6 10 3104.01 401.617 2
 2 6 10 3050.9 451.893 2
 -2 -6 10 3655.13 630.396 6
 2 -6 10 2689.22 547.467 4
 2 -6 10 2515.17 479.335 6
 2 6 11 -48.1207 288.772 2
 2 -6 11 -98.1828 455.203 4
 -2 6 11 65.0159 205.865 2
 -2 -6 11 310.12 509.898 6
 -2 -6 11 81.1629 373.165 4
 2 -6 11 -247.377 407.568 6
 2 -6 12 7087.69 894.632 4
 2 6 12 7505.13 746.65 2
 -2 -6 12 7435.37 858.772 6
 2 -6 12 6432.48 719.671 6
 -2 -6 12 6531.82 877.143 4
 -2 -6 13 9549.3 942.855 6
 2 6 13 8687.36 827.414 2
 2 -6 13 10454.6 1116.53 4
 -2 -6 13 10891.9 1108.31 4
 -2 -6 14 35209.5 1956.14 4
 -2 -6 14 31932.8 1620.09 6
 2 -6 14 34972.2 1972.36 4
 2 -6 15 4321 825.59 4
 -2 -6 15 4440.91 805.445 4
 -2 -6 15 3771.21 643.148 6
 2 6 15 5854.57 969.978 4
 2 6 16 26437.8 1835.84 4
 -2 -6 16 20723.4 1522.4 4
 -2 6 16 24117.9 1749.2 4
 2 -6 16 20276.1 1547.95 4
 2 6 17 380.043 483.205 4
 -2 -6 17 560.051 421.625 4
 2 -6 17 808.829 523.964 4
 -2 6 17 135.213 479.276 4
 2 6 18 912.32 561.217 4
 -2 6 18 1340.18 602.764 4
 2 -6 18 276.709 430.36 4
 -2 6 19 203.209 361.052 4
 2 6 19 43.8933 416.175 4
 -2 -8 0 5690.03 453.029 1
 2 -8 1 8180.27 326.927 1
 -2 -8 1 8512.71 476.114 1
 -2 -8 2 48674.5 1085.05 1
 2 -8 2 47797.7 737.714 1
 -2 -8 3 35008.4 967.68 1
 2 -8 3 37115.9 822.584 1
 2 -8 4 287497 2754.39 1
 -2 -8 4 306491 2961.42 1
 -2 -8 5 35216.8 1163.42 1
 2 -8 5 34700.2 1172.17 1
 2 -8 6 102951 2178.5 1
 -2 -8 6 107090 2196.7 1
 -2 -8 7 28113.4 1291.84 1
 2 -8 7 26139.2 1166.82 1
 -2 -8 8 24619.5 1341.16 1
 2 -8 9 2569.37 513.177 4
 -2 -8 9 2378.19 541.117 1
 2 -8 9 2185.62 429.13 6
 -2 -8 9 3475.37 607.283 6
 -2 8 10 8684.74 673.088 2
 -2 -8 10 6492.1 771.652 4
 -2 -8 10 10095 941.843 6
 2 -8 10 7481.39 836.914 4
 -2 -8 10 9037.28 938.553 1
 2 -8 10 7876.58 765.821 6
 2 -8 11 5042.58 768.729 4
 -2 8 11 4304.19 514.261 2
 -2 -8 11 3849.04 688.564 4
 2 8 11 5076.55 639.452 2
 2 -8 11 4329.9 604.62 6
 -2 -8 11 4769.7 752.442 6
 2 -8 12 7200.17 898.666 4
 2 -8 12 6579.68 752.897 6
 -2 -8 12 6553.81 865.34 4
 -2 -8 12 6360.23 798.096 6
 2 8 12 6456.04 730.962 2
 2 8 13 11594.5 968.574 2
 -2 -8 13 16197.4 1338.37 4
 -2 -8 13 14770.9 1155.93 6
 2 -8 13 15589.1 1080.13 6
 2 -8 13 15154.6 1327.77 4
 2 -8 14 45615.9 2238.6 4
 -2 -8 14 45305.5 2221.96 4
 -2 -8 14 42044.2 1854.43 6
 -2 -8 15 23513 1618.7 4
 -2 -8 15 23308.2 1369.9 6
 2 -8 15 24444.7 1690.48 4
 2 -8 16 6156.9 942.417 4
 2 8 16 7195.12 1063.13 4
 -2 8 16 7671 1073.23 4
 -2 -8 16 5934.63 861.619 4
 2 8 17 -16.6846 520.755 4
 -2 8 17 1336.87 659.681 4
 2 -8 17 -43.7921 427.883 4
 2 8 18 570.1 524.176 4
 -2 8 18 176.169 476.194 4
 -2 8 19 366.809 398.951 4
 2 8 19 541.149 441.105 4
 -2 -10 0 21095.4 878.106 1
 2 -10 0 22104.5 755.526 1
 -2 -10 1 13800.5 655.443 1
 2 -10 1 14163.1 497.865 1
 -2 -10 2 1262.5 305.149 1
 2 -10 2 1256.91 193.032 1
 -2 -10 3 57875.4 1316.93 1
 2 -10 3 52921.5 985.449 1
 2 -10 4 151331 1975.41 1
 -2 -10 4 150904 2200.77 1
 2 -10 5 131718 2123.01 1
 -2 -10 5 130393 2250.4 1
 -2 -10 6 195798 3035.33 1
 2 -10 6 193218 2948.41 1
 -2 -10 7 57187.4 1837.2 1
 2 -10 7 55246.7 1732.51 1
 2 -10 8 4151.67 525.833 1
 -2 -10 8 3372.51 615.386 1
 -2 -10 9 3024.05 591.548 1
 -2 -10 9 2202.32 453.348 4
 2 -10 9 2402.04 540.1 4
 2 -10 9 2480.61 466.524 6
 -2 -10 9 3549.33 593.313 6
 -2 -10 10 2300.15 572.995 1
 -2 -10 10 1834.14 511.662 4
 2 -10 10 1522.38 435.285 6
 -2 -10 10 2119.67 580.155 6
 2 -10 10 1692.74 499.915 4
 -2 10 11 1704.78 381.341 2
 -2 -10 11 1789.81 513.484 4
 2 -10 11 2117.08 523.071 6
 -2 -10 11 1603.2 590.911 1
 -2 -10 11 1636.38 571.856 6
 2 -10 11 1080.76 472.991 4
 -2 -10 12 5302.32 732.323 6
 -2 -10 12 5374.04 784.749 4
 2 -10 12 6370.21 849.835 4
 2 10 12 5297.71 683.957 2
 2 -10 12 6785.86 759.444 6
 2 -10 13 10001.6 1092.87 4
 2 10 13 8194.75 840.94 2
 2 -10 13 10902.9 934.636 6
 -2 -10 13 9380.89 957.841 6
 -2 -10 13 10463.6 1081.46 4
 -2 -10 14 34458 1904.67 4
 2 -10 14 31156.6 1528.5 6
 -2 -10 14 30001.4 1578.02 6
 2 -10 14 32564.9 1919.28 4
 -2 -10 15 13756.5 1255.18 4
 2 -10 15 13977 1314.97 4
 -2 -10 15 14043.6 1078.44 6
 2 -10 16 12534.3 1229.68 4
 -2 -10 16 10624.2 1094.49 4
 -2 -10 16 11623.6 955.442 6
 2 10 17 2954.85 799.375 4
 -2 10 17 1938.71 707.459 4
 2 -10 17 1343.89 549.216 4
 2 10 18 60.92 547.289 4
 -2 10 18 -567.727 554.706 4
 -2 10 19 -251.159 387.61 4
 2 10 19 -103.282 415.882 4
 2 -12 0 28807.8 945.105 1
 -2 -12 0 30892 1099.68 1
 -2 -12 1 46943.6 1261.59 1
 2 -12 1 50080.7 1054.9 1
 -2 -12 -1 49811.6 1421.51 1
 2 -12 2 1864.65 248.514 1
 -2 -12 2 2242.84 356.116 1
 -2 -12 3 7026.1 534.965 1
 2 -12 3 6212.61 374.439 1
 2 -12 4 57938.2 1240.42 1
 -2 -12 4 59939.6 1442.91 1
 -2 -12 5 75686.7 1772.26 1
 2 -12 5 72874.5 1588.94 1
 2 -12 6 89732.5 2072.01 1
 -2 -12 6 96970.1 2179 1
 2 -12 7 14140.6 927.034 1
 -2 -12 7 14866.8 986.201 1
 2 -12 8 333.051 317.942 6
 2 -12 8 476.706 337.344 4
 -2 -12 8 519.988 403.198 6
 -2 -12 8 444.78 322.939 1
 2 -12 8 572.014 347.535 1
 2 -12 9 12447 992.293 4
 2 -12 9 12239.5 901.878 6
 -2 -12 9 14578.2 1160.62 1
 -2 -12 9 14122.1 1060.93 6
 2 -12 10 6366.64 712.996 6
 -2 -12 10 5043.92 685.732 4
 -2 -12 10 5000.12 807.069 1
 2 -12 10 5455.77 751.446 4
 -2 -12 10 6440.29 807.314 6
 -2 -12 11 406.074 326.287 4
 2 -12 11 1020.44 450.007 6
 -2 -12 11 660.902 452.239 1
 -2 -12 11 970.119 470.823 6
 2 -12 11 848.425 429.745 4
 2 -12 12 1120.2 479.96 6
 2 -12 12 622.596 504.577 4
 -2 -12 12 412.188 469.829 6
 2 12 12 508.244 371.946 2
 -2 -12 12 625.18 429.086 4
 2 -12 13 10958.5 1130.51 4
 -2 -12 13 8203.42 901.662 6
 -2 -12 13 10487.8 1076.3 4
 2 -12 13 10093.7 924.528 6
 2 -12 14 3240.44 582.042 6
 -2 -12 14 3344.46 680.182 4
 -2 -12 14 2598.11 591.19 6
 2 -12 14 3148.39 701.492 4
 2 -12 15 13392.3 990.655 6
 -2 -12 15 13977.8 1099.86 6
 2 -12 15 13237.6 1284.46 4
 -2 -12 15 13217.9 1240.76 4
 -2 -12 16 1824.88 471.524 6
 2 -12 16 2176.01 650.609 4
 -2 12 17 1528.79 653.232 4
 2 12 17 2030.88 764.084 4
 2 12 18 -539.784 517.973 4
 -2 12 18 -218.775 447.67 4
 2 12 19 -99.0079 399.771 4
 -2 -14 0 70044.4 1730.91 1
 2 -14 0 67572.1 1565.14 1
 2 -14 1 38738.2 1035.36 1
 -2 -14 -1 36930.2 1329.03 1
 -2 -14 1 37992.5 1232.51 1
 -2 -14 2 989.578 329.336 1
 2 -14 2 1244.58 239.642 1
 -2 -14 3 9050.61 656.048 1
 2 -14 3 8542.39 461.84 1
 2 -14 4 3376.55 353.322 1
 -2 -14 4 3701.23 443.529 1
 -2 -14 5 90523.5 1981.63 1
 2 -14 5 74800.1 1619.43 1
 -2 -14 6 9779.96 789.841 1
 2 -14 6 9157.42 683.786 1
 2 -14 7 1973.6 397.372 1
 2 -14 7 1969.62 412.784 6
 -2 -14 7 2164.56 452.596 1
 -2 -14 7 2112.79 496.072 6
 2 -14 8 6773.59 682.703 6
 2 -14 8 5652.53 696.929 4
 2 -14 8 5328.94 631.605 1
 -2 -14 8 6779.71 757.75 6
 -2 -14 8 5915.79 779.415 1
 -2 -14 9 66983.8 2528.73 1
 -2 -14 9 72243.3 2304.73 6
 2 -14 9 70426.9 2093.66 1
 2 -14 9 65493.8 2268.55 4
 2 -14 9 71029.5 2112.02 6
 2 -14 10 15421.8 1057.18 6
 -2 -14 10 14394.5 1094.96 6
 -2 -14 10 10759.1 974.407 4
 -2 -14 10 12035.4 1181.21 1
 2 -14 10 12857.3 1121.64 4
 2 -14 11 13907.3 1054.7 6
 -2 -14 11 12195.5 1067.41 4
 -2 -14 11 13433.9 1079.96 6
 -2 -14 11 12601.8 1201.1 1
 2 -14 11 12320.7 1128.15 4
 2 -14 12 845.949 475.431 6
 -2 -14 12 -250.886 516.688 6
 -2 -14 12 216.042 383.521 4
 2 -14 12 823.154 464.206 4
 2 14 13 1714.77 491.21 2
 2 -14 13 2821.68 687.307 4
 2 -14 13 3755.29 642.106 6
 -2 -14 13 3008.1 685.403 4
 -2 -14 13 2154.59 548.011 6
 2 -14 14 4416.13 833.323 4
 -2 -14 14 5690.17 789.35 6
 2 -14 14 4891.76 658.027 6
 2 -14 15 3451.94 556.366 6
 -2 -14 15 3143.87 596.893 6
 -2 -14 16 -46.8203 313.179 6
 2 -14 16 -50.5002 275.794 6
 -2 14 17 1169.05 666.819 4
 2 14 17 1784.56 731.56 4
 -2 -14 17 140.463 295.99 6
 -2 14 18 2605.56 698.307 4
 2 14 18 964.8 498.584 4
 -2 -16 0 10924.6 785.075 1
 2 -16 0 11615.9 710.886 1
 2 -16 1 55844.2 1358.4 1
 -2 -16 -1 53536.6 1710.75 1
 2 -16 -1 55498.5 1580.59 1
 -2 -16 1 52997.8 1568.92 1
 -2 -16 -2 2353.05 480.637 1
 2 -16 2 2577.17 328.408 1
 -2 -16 2 2333.09 415.73 1
 2 -16 3 3460.12 336.113 1
 -2 -16 3 4131.5 509.801 1
 2 -16 4 1185.24 252.465 1
 -2 -16 4 1347.82 329.211 1
 -2 -16 5 21239.5 1010.61 1
 2 -16 5 20029 861.609 1
 2 -16 6 3990 467.944 1
 2 -16 6 4047.52 517.736 6
 -2 -16 6 4195.54 556.557 1
 2 -16 7 15119.5 922.4 6
 -2 -16 7 16883.9 1081.54 1
 -2 -16 7 17429.2 1103.61 6
 2 -16 7 14815.2 943.84 1
 -2 -16 -7 14774.7 803.917 3
 2 -16 -7 14778.5 760.357 3
 2 -16 8 18277.5 1090.61 1
 -2 -16 8 21873 1257.9 6
 2 -16 8 19808.1 1267.04 4
 -2 -16 8 19831.7 1307.3 1
 2 -16 8 21396.9 1165.85 6
 -2 -16 -8 19713.4 956.588 3
 -2 -16 -9 53987.9 1620.66 3
 -2 -16 9 59505.5 2078.23 6
 2 -16 9 56132 2186.06 4
 -2 -16 9 56838.9 2322.8 1
 2 -16 9 58852.4 1955.6 6
 2 -16 10 11985.4 979.773 6
 2 -16 10 12230 1128.96 4
 -2 -16 10 8811.25 1096.02 1
 -2 -16 10 10149.1 969.861 6
 2 -16 11 11398.1 1130.85 4
 -2 -16 11 10106.3 1097.26 1
 2 -16 11 12365 1011.19 6
 -2 -16 11 11690.5 1029.23 6
 -2 -16 12 688.319 486.307 6
 2 -16 12 1383.5 516.015 6
 2 -16 12 977.286 492.196 4
 -2 -16 13 1680.99 560.529 6
 2 -16 13 1804.15 508.022 6
 2 -16 14 172.599 343.259 6
 -2 -16 14 575.693 467.778 6
 -2 -16 15 807.992 428.366 6
 2 -16 15 789.71 377.995 6
 -2 -16 16 123.498 324.331 6
 2 -16 16 95.1227 284.51 6
 -2 -16 17 9147.98 788.468 6
 2 16 17 14666.8 1386.19 4
 2 16 18 1139.33 509.565 4
 -2 16 18 2118.28 621.598 4
 2 -18 0 901.853 299.55 1
 -2 -18 0 886.081 351.636 1
 -2 -18 1 67848 1888.16 1
 2 -18 -1 69389 1886.04 1
 2 -18 1 71670.2 1656.95 1
 -2 -18 -1 66434 2007.57 1
 -2 -18 -2 223.553 335.39 1
 -2 -18 2 175.619 283.38 1
 2 -18 2 354.705 227.783 1
 -2 -18 3 308.801 282.839 1
 2 -18 3 197.961 185.36 1
 -2 -18 4 279.758 275.325 1
 2 -18 4 342.504 189.188 1
 2 -18 5 958.631 333.877 6
 2 -18 5 681.833 230.941 1
 -2 -18 5 907.509 339.01 1
 2 -18 6 1339.39 306.031 1
 -2 -18 6 1525.16 412.944 1
 2 -18 -6 1776.44 339.244 3
 -2 -18 -6 1823.17 362.924 3
 2 -18 6 1985.44 416.079 6
 -2 -18 6 1403.71 394.013 6
 -2 -18 7 22942.4 1296.2 1
 2 -18 7 22303.6 1136.72 6
 2 -18 -7 23185.9 984.429 3
 -2 -18 -7 22807.6 1008.46 3
 -2 -18 7 23450.3 1273.81 6
 -2 -18 8 2011.78 532.995 1
 -2 -18 -8 2701.43 466.173 3
 -2 -18 8 2477.83 548.396 6
 2 -18 8 3343.57 569.603 6
 -2 -18 9 104645 2794.72 6
 2 -18 9 107286 2673.14 6
 -2 -18 -9 108715 2364.15 3
 -2 -18 10 1714.59 560.326 1
 2 -18 10 2466.56 583.031 6
 -2 -18 10 1160.07 473.772 6
 -2 -18 11 32512.1 1639.77 6
 2 -18 11 36020.1 1666.61 6
 2 -18 12 325.445 403.134 6
 -2 -18 12 749.889 450.08 6
 -2 -18 13 1562.93 537.154 6
 2 -18 13 1219.85 458.378 6
 -2 -18 14 388.97 423.243 6
 2 -18 14 -40.9841 360.529 6
 -2 -18 15 3251.04 629.598 6
 2 -18 15 3551.05 578.265 6
 -2 -18 16 37.6852 311.872 6
 2 -18 16 775.507 341.43 6
 2 18 17 7632.01 1012.74 4
 -2 -18 17 5620.62 633.158 6
 -2 18 18 1925.45 569.214 4
 2 18 18 553.963 482.339 4
 2 -20 0 728.366 321.782 1
 -2 -20 0 817.926 390.065 1
 -2 -20 -1 12378.2 937.584 1
 -2 -20 1 12662.1 900.542 1
 2 -20 1 12877.4 773.726 1
 2 -20 -1 11963.6 856.956 1
 2 -20 -2 760.471 356.167 1
 2 -20 2 1098.77 305.115 1
 -2 -20 -2 1000.57 426.828 1
 -2 -20 2 996.197 379.73 1
 2 -20 3 381.071 200.865 1
 -2 -20 -3 587.573 397.67 1
 -2 -20 3 412.369 310.96 1
 2 -20 4 4271.48 504.317 6
 -2 -20 -4 4285.31 484.861 3
 2 -20 -4 4266.1 441.422 3
 -2 -20 4 3681.27 548.34 1
 2 -20 4 3372.82 387.908 1
 2 -20 5 5079.27 488.56 1
 2 -20 -5 5397.95 496.889 3
 -2 -20 5 5059.52 572.938 6
 -2 -20 -5 5874.49 551.13 3
 -2 -20 5 6332.87 651.844 1
 2 -20 5 5793.77 594.104 6
 2 -20 6 701.621 330.695 6
 -2 -20 6 506.916 319.088 1
 2 -20 6 555.836 294.664 5
 -2 -20 -6 704.319 319.901 3
 -2 -20 6 648.623 333.953 6
 2 -20 -6 509.086 260.412 3
 -2 -20 7 3053.65 531.623 6
 2 -20 -7 3133.5 433.352 3
 -2 -20 -7 3230.14 460.134 3
 2 -20 7 3378.67 543.701 6
 -2 -20 7 3461.54 592.94 1
 -2 -20 8 -204.642 440.184 6
 -2 -20 8 36.6066 298.055 1
 2 -20 8 385.185 388.46 6
 -2 -20 -8 42.0584 303.344 3
 2 -20 9 28815.6 1459.22 6
 -2 -20 -9 31614.3 1345.96 3
 -2 -20 9 28876.8 1521.98 6
 -2 -20 10 -39.9527 351.273 1
 2 -20 10 468.781 435.343 6
 -2 -20 -10 -37.8858 334.052 3
 -2 -20 10 -447.122 537.196 6
 -2 -20 11 1922.5 582.265 6
 2 -20 11 1213.86 484.469 6
 2 -20 12 533.229 415.721 6
 -2 -20 12 907.984 514.123 6
 -2 -20 13 3199.88 623.722 6
 2 -20 13 3079.64 583.047 6
 -2 -20 14 725.948 420.5 6
 2 -20 14 498.946 370.668 6
 -2 -20 15 5500.23 732.712 6
 2 -20 15 5821.65 703.303 6
 2 -20 16 246.183 285.421 6
 -2 -20 16 57.0087 302.149 6
 2 -20 17 1115.39 307.302 6
 -2 -20 17 1594.58 386.984 6
 2 20 18 17.322 393.146 4
 -2 -22 0 653.139 382.413 1
 2 -22 0 437.604 299.647 1
 2 -22 1 32016.7 1245.37 1
 -2 -22 -1 32581.7 1487.25 1
 -2 -22 1 33410.6 1479.86 1
 2 -22 -1 34304.8 1414.04 1
 -2 -22 -2 328.817 369.809 1
 2 -22 -2 186.331 245.934 3
 2 -22 -2 146.58 277.72 1
 2 -22 2 330.67 278.688 5
 -2 -22 2 408.528 310.526 1
 2 -22 2 251.085 209.924 1
 -2 -22 -2 142.395 247.478 3
 -2 -22 3 82335.5 2307.9 1
 2 -22 3 72701.4 1889.3 6
 2 -22 -3 78798.8 2398.41 1
 -2 -22 -3 75037.1 1754.23 3
 2 -22 -3 75788.2 1698.11 3
 2 -22 3 70637.4 1658.27 1
 -2 -22 -3 79210.5 2544.64 1
 2 -22 3 77036.3 1905.49 5
 2 -22 4 1594.82 423.87 5
 2 -22 4 1656.68 399.853 6
 2 -22 -4 1063.29 300.922 3
 -2 -22 4 1394.75 417.609 1
 -2 -22 -4 1449.05 383.226 3
 -2 -22 -4 1389.57 527.224 1
 -2 -22 4 1370.93 405.829 6
 2 -22 5 111979 2469.47 5
 -2 -22 5 121146 2786 1
 -2 -22 5 112824 2575.05 6
 -2 -22 -5 114281 2223.6 3
 2 -22 -5 116324 2162.61 3
 2 -22 5 116669 2511.25 6
 -2 -22 6 402.006 322.152 1
 -2 -22 -6 679.959 345.932 3
 2 -22 -6 596.777 303.243 3
 -2 -22 6 614.835 391.61 6
 2 -22 6 1023.3 399.575 6
 2 -22 6 262.707 315.32 5
 -2 -22 -7 25056.8 1131.46 3
 2 -22 7 26629.8 1327 6
 -2 -22 7 23817.4 1437.56 1
 -2 -22 7 24317.5 1366.94 6
 2 -22 -7 25542.1 1093.71 3
 -2 -22 -8 160.057 322.449 3
 -2 -22 8 209.903 327.529 1
 2 -22 8 368.294 389.84 6
 -2 -22 8 338.344 453.841 6
 2 -22 9 5456.15 725.849 6
 -2 -22 9 6050.75 823.296 6
 -2 -22 -9 5033.78 620.163 3
 -2 -22 10 1023.79 551.703 6
 2 -22 10 781.389 455.298 6
 -2 -22 -10 876.71 395.912 3
 2 -22 11 15869.3 1163.93 6
 -2 -22 11 14488.9 1169.95 6
 -2 -22 12 1043.95 495.208 6
 2 -22 12 1187 498.07 6
 -2 -22 13 6852.86 819.317 6
 2 -22 13 6563.99 781.315 6
 -2 -22 14 279.544 386.826 6
 2 -22 14 67.633 353.199 6
 2 -22 15 17227.8 1131.25 6
 -2 -22 15 15884.2 1089.08 6
 -2 -22 16 350.708 324.044 6
 2 -22 16 129.35 283.21 6
 -2 -22 17 752.143 313.284 6
 2 -22 17 289.035 211.758 6
 -2 -24 0 1668.28 471.318 1
 -2 -24 0 1381.05 356.754 3
 2 -24 0 953.07 288.937 3
 2 -24 0 1350.52 343.796 1
 2 -24 1 1603.72 317.371 3
 2 -24 -1 1884.83 385.452 1
 -2 -24 1 1520.04 351.094 3
 -2 -24 1 2145.56 475.064 1
 -2 -24 -1 2125.71 478.211 1
 2 -24 1 1847.57 386.342 6
 -2 -24 -1 1870.4 380.487 3
 2 -24 -1 1966.36 364.61 3
 2 -24 1 2071.62 365.476 1
 -2 -24 -2 1237.44 431.4 1
 2 -24 -2 1094.04 375.509 1
 -2 -24 2 1082.31 308.441 6
 2 -24 2 1265.74 340.139 6
 -2 -24 2 1369.13 428.789 1
 -2 -24 2 1087.76 302.054 3
 -2 -24 -2 1411.06 365.373 3
 2 -24 -2 1018.07 303.927 3
 2 -24 2 1766.25 401.104 5
 2 -24 3 94287.8 2247.12 6
 -2 -24 -3 90811.1 1998.15 3
 -2 -24 3 97433.2 2604.68 1
 -2 -24 -3 95333.5 2950.9 1
 -2 -24 3 86851.9 2101.95 5
 -2 -24 3 82702.7 2073.02 6
 2 -24 -3 90737.9 1924.2 3
 2 -24 -3 96339.8 2792.54 1
 2 -24 3 100099 2248.47 5
 2 -24 -4 10379.2 728.669 3
 -2 -24 4 11986.7 978.673 1
 2 -24 4 11005.6 832.485 5
 2 -24 -4 10580.7 1054.88 1
 -2 -24 4 8561.46 770.783 5
 2 -24 4 10578.3 826.183 6
 -2 -24 4 12312.1 896.531 6
 -2 -24 -4 9992.82 733.53 3
 -2 -24 -4 11167.6 1120.75 1
 2 -24 5 123310 2699.72 5
 -2 -24 -5 122120 3636.97 1
 2 -24 -5 118128 2281.28 3
 -2 -24 -5 118532 2357.23 3
 -2 -24 5 118474 2720.24 6
 -2 -24 5 119164 2968.08 1
 2 -24 5 121210 2665.54 6
 -2 -24 -6 10567.8 790.003 3
 -2 -24 6 9912.45 987.995 1
 2 -24 -6 10100.5 742.09 3
 2 -24 6 9363.41 855.221 5
 -2 -24 6 11175.1 945.573 6
 2 -24 6 11123.2 902.364 6
 2 -24 7 27333.2 1393.89 6
 -2 -24 7 27453.3 1438.83 6
 -2 -24 7 22515.8 1459.05 1
 2 -24 -7 25404.6 1137.19 3
 -2 -24 -7 25564.9 1176.74 3
 2 -24 8 512.929 405.181 6
 -2 -24 8 832.479 491.136 6
 -2 -24 -8 176.163 339.979 3
 -2 -24 -9 1321.91 412.096 3
 -2 -24 9 1866.58 571.036 6
 2 -24 9 1263.8 512.878 6
 -2 -24 -10 -89.4812 401.725 3
 -2 -24 10 738.993 513.322 6
 2 -24 10 269.257 423.785 6
 -2 -24 11 10362 1004.44 6
 2 -24 11 10721.2 997.393 6
 2 -24 12 142.078 376.433 6
 -2 -24 12 -239.542 452.105 6
 2 -24 13 30597.1 1550.83 6
 -2 -24 13 27609.8 1502.16 6
 2 -24 14 1030.47 422.16 6
 -2 -24 14 1279.04 469.63 6
 2 -24 15 24880.1 1305.67 6
 -2 -24 15 25987.3 1345.5 6
 2 -24 16 1079.55 341.334 6
 -2 -24 16 892.376 340.9 6
 2 24 17 1412.5 497.868 4
 -2 -26 0 11.2653 317.436 1
 2 -26 0 -96.0457 284.045 3
 -2 -26 0 65.0744 278.753 3
 -2 -26 1 168.705 335.686 1
 -2 -26 -1 6.90843 309.041 1
 -2 -26 1 222.762 272.784 3
 2 -26 -1 -8.43869 283.535 3
 2 -26 1 98.6253 250.912 6
 2 -26 1 -16.6901 251.205 3
 -2 -26 -1 99.3953 276.167 3
 2 -26 -1 253.078 242.181 1
 -2 -26 2 3183.8 447.315 3
 -2 -26 -2 4067.29 668.389 1
 2 -26 2 3958.94 542.294 5
 -2 -26 2 4536.75 654.56 1
 -2 -26 2 3029.98 447.904 6
 2 -26 -2 3981.68 585.788 1
 2 -26 2 3333.93 496.224 6
 2 -26 -2 3399.51 469.522 3
 -2 -26 -2 3938.44 510.464 3
 2 -26 2 3249.94 420.31 3
 -2 -26 3 57199.1 1785.29 6
 2 -26 3 65686.2 1896.95 5
 -2 -26 3 60286.4 1819.51 5
 2 -26 -3 59868.6 1630.64 3
 -2 -26 -3 65570 2509.54 1
 -2 -26 3 65557.1 2241.07 1
 2 -26 -3 60583.8 2295.36 1
 -2 -26 -3 61142.4 1690.49 3
 2 -26 3 62950.5 1922.52 6
 2 -26 4 19733.3 1138.79 5
 -2 -26 -4 17980.2 983.421 3
 -2 -26 4 18164.8 1227.67 1
 -2 -26 4 19314.4 1108.25 6
 2 -26 -4 16965.1 905.674 3
 -2 -26 -4 17991.1 1442.76 1
 2 -26 -4 19335.7 1416.18 1
 2 -26 4 18117.7 1081.4 6
 -2 -26 4 17559 1045.78 5
 -2 -26 5 131835 3208.58 1
 -2 -26 -5 134442 3981.41 1
 -2 -26 5 137189 2992.39 6
 -2 -26 5 131553 2853.28 5
 2 -26 5 142524 3005.85 6
 2 -26 -5 134254 2507.73 3
 -2 -26 -5 133219 2586.96 3
 2 -26 -5 133289 3827.75 1
 2 -26 5 143649 3003.32 5
 2 -26 6 11378.8 933.475 5
 -2 -26 6 11977.1 978.735 6
 -2 -26 -6 10371.5 1259.73 1
 2 -26 6 12472.8 979.735 6
 -2 -26 -6 11374.3 835.545 3
 2 -26 -6 11030.1 792.489 3
 -2 -26 -7 33148 1368.51 3
 2 -26 7 34665.5 1617.23 6
 -2 -26 7 35243 1650.11 6
 -2 -26 8 882.478 538.333 6
 -2 -26 -8 206.024 357.408 3
 2 -26 8 392.822 424.326 6
 -2 -26 -9 9380.12 817.393 3
 2 -26 9 9468.47 940.907 6
 -2 -26 9 11012.6 1045.56 6
 2 -26 10 633.448 428.144 6
 -2 -26 10 957.878 525.715 6
 2 -26 11 7211.06 840.204 6
 -2 -26 11 6637.6 838.953 6
 -2 -26 12 4204.31 708.091 6
 2 -26 12 3976.58 674.12 6
 -2 -26 13 12537.7 1029.49 6
 2 -26 13 13933 1073.55 6
 2 -26 14 7748.76 809.257 6
 -2 -26 14 7623.99 798.133 6
 -2 -26 15 21409.2 1192.9 6
 2 -26 15 20951.9 1130.44 6
 -2 -26 16 1163.4 348.964 6
 2 -26 16 1186.95 318.257 6
 -2 -28 0 2435.23 542.31 1
 -2 -28 0 2264.47 449.993 3
 2 -28 0 2147.48 395.73 3
 2 -28 1 2912.41 487.237 6
 2 -28 1 3401.48 530.546 5
 -2 -28 1 3276.3 481.882 3
 2 -28 1 3320.41 456.64 3
 -2 -28 -1 3328.81 503.763 3
 2 -28 -1 3097.93 461.991 3
 -2 -28 1 3287.81 596.161 1
 -2 -28 -1 3376.82 624.113 1
 2 -28 2 1657.63 401.867 6
 -2 -28 -2 1757.18 497.457 1
 -2 -28 -2 1497.97 396.325 3
 -2 -28 2 1016.78 316.525 6
 2 -28 2 1290.53 314.801 3
 -2 -28 2 1608.78 441.819 1
 2 -28 2 2007.77 475.575 5
 -2 -28 2 1342.76 354.243 3
 2 -28 -2 1603.04 387.737 3
 2 -28 3 25541.4 1233.91 5
 2 -28 3 23026.6 1210.49 6
 -2 -28 3 22828.2 1192 6
 -2 -28 -3 24362.3 1136.81 3
 -2 -28 -3 25276.2 1608.86 1
 2 -28 -3 23490.2 1080.6 3
 -2 -28 3 23426.4 1403.97 1
 -2 -28 3 24452.2 1215.4 5
 -2 -28 4 16408.6 1049.29 5
 2 -28 4 17412.1 1103.97 6
 2 -28 4 18570.7 1141.15 5
 2 -28 -4 15755.1 1306.06 1
 2 -28 -4 16030.4 920.045 3
 -2 -28 4 16927 1077.47 6
 -2 -28 -4 18625.2 1486.88 1
 -2 -28 -4 16628.9 975.695 3
 2 -28 -5 14196.4 1319.69 1
 2 -28 -5 16386.8 954.04 3
 2 -28 5 18312.7 1144.57 5
 -2 -28 5 16848.4 1119.28 6
 -2 -28 -5 16548.5 1497.89 1
 -2 -28 5 15504.7 1042.98 5
 2 -28 5 17532 1137.39 6
 -2 -28 -5 17140.3 1003.48 3
 2 -28 -6 11687.6 1308.44 1
 -2 -28 -6 13947.7 930.559 3
 -2 -28 6 14779.5 1091.36 6
 2 -28 6 14624.9 1080.6 6
 -2 -28 -6 13559.8 1445.9 1
 2 -28 6 13310 1016.33 5
 2 -28 -7 707.206 482.432 1
 2 -28 7 910.854 442.197 6
 -2 -28 -7 526.409 540.985 1
 -2 -28 7 1232.06 503.928 6
 -2 -28 -7 912.837 391.037 3
 2 -28 -8 1436.91 575.928 1
 -2 -28 -8 1608.25 702.023 1
 -2 -28 8 2619.3 610.083 6
 -2 -28 -8 1839.28 462.312 3
 2 -28 8 2387.68 554.367 6
 -2 -28 -9 5376.38 651.975 3
 -2 -28 9 5631.94 799.505 6
 2 -28 9 5300.55 782.64 6
 -2 -28 10 904.207 467.821 6
 2 -28 10 1328 516.377 6
 -2 -28 11 39.8371 417.251 6
 2 -28 11 189.122 412.577 6
 2 -28 12 1690.41 511.882 6
 -2 -28 12 2252.7 545.883 6
 2 -28 13 22283.5 1299.22 6
 -2 -28 13 21967.8 1313.03 6
 -2 -28 14 6303.78 724.235 6
 2 -28 14 5533.5 676.455 6
 2 -28 15 12769.8 862.898 6
 -2 -28 15 13348.9 924.325 6
 -2 -28 16 902.889 291.619 6
 -2 -30 0 27927.9 1222.44 3
 2 -30 0 28935.9 1277.63 5
 2 -30 0 27073.1 1167.37 3
 -2 -30 0 26313.8 1609.11 1
 -2 -30 1 13548.1 863.855 3
 -2 -30 1 12595.4 1085.97 1
 -2 -30 -1 12702.8 1140.06 1
 2 -30 -1 13562.3 852.549 3
 2 -30 1 13079.2 908.875 5
 -2 -30 -1 12883.5 881.643 3
 2 -30 -2 993.065 366.214 3
 2 -30 2 1109.33 368.152 6
 -2 -30 -2 1082.94 393.709 3
 -2 -30 2 1094.92 345.893 3
 -2 -30 2 1379.72 436.791 5
 -2 -30 -2 1250.95 475.036 1
 2 -30 2 1393.58 453.553 5
 2 -30 3 1121.52 433.406 5
 -2 -30 -3 773.263 398.95 3
 -2 -30 -3 668.88 415.68 1
 2 -30 -3 538.469 309.208 3
 -2 -30 3 614.271 309.244 6
 2 -30 3 617.241 352.308 6
 -2 -30 3 941.4 418.263 5
 -2 -30 -4 -6.31423 386.528 1
 2 -30 -4 61.4903 341.967 3
 -2 -30 4 31.0594 328.066 6
 -2 -30 -4 326.941 352.029 3
 2 -30 4 -60.4843 446.865 5
 2 -30 4 481.29 357.628 6
 -2 -30 4 363.183 376.733 5
 2 -30 5 7868.61 802.557 5
 -2 -30 -5 7609.47 730.264 3
 -2 -30 -5 7863.45 1065.78 1
 -2 -30 5 7861.71 810.631 6
 2 -30 5 8409.79 843.82 6
 -2 -30 5 6790.74 743.031 5
 -2 -30 6 2824.78 575.804 6
 2 -30 6 2517.23 569.101 5
 -2 -30 -6 1726.77 446.458 3
 2 -30 6 2309.95 542.151 6
 -2 -30 -6 1842.94 647.473 1
 -2 -30 7 8510.54 881.13 6
 -2 -30 -7 7756.61 747.783 3
 -2 -30 -7 6413.97 1127.72 1
 2 -30 7 8540.13 928.32 6
 -2 -30 -8 3953.91 574.611 3
 2 -30 8 3595.24 687.483 6
 -2 -30 8 3448.51 660.866 6
 -2 -30 9 27214.5 1534.72 6
 2 -30 9 27466.7 1593.24 6
 -2 -30 10 13786.1 1131.33 6
 2 -30 10 13411.3 1166.57 6
 -2 -30 11 6081.04 798.221 6
 2 -30 11 6625.46 838.175 6
 2 -30 12 368.844 367.552 6
 -2 -30 12 609.128 522.35 6
 -2 -30 13 1956.03 489.011 6
 2 -30 13 1555.34 438.995 6
 2 -30 14 4810.73 595.317 6
 -2 -30 14 5586.97 646.994 6
 2 -30 15 1050.45 327.763 6
 -2 -30 15 1119.65 333.041 6
 2 -32 0 49577.2 1726.82 5
 -2 -32 0 49836 1663.59 3
 2 -32 1 37976.9 1514.45 5
 -2 -32 -1 39168.6 1492.91 3
 -2 -32 1 35353.2 1379.9 3
 -2 -32 -2 10499.8 1097.79 1
 -2 -32 2 12148.1 905.628 5
 -2 -32 2 11749.4 804.205 3
 -2 -32 -2 12527.4 894.536 3
 2 -32 2 12345 920.211 5
 -2 -32 3 9735.73 824.891 5
 -2 -32 -3 7045.42 965.164 1
 -2 -32 -3 9308.95 812.692 3
 -2 -32 3 8543.24 799.512 6
 2 -32 3 10272.2 872.056 5
 2 -32 3 8925.57 837.081 6
 -2 -32 4 1228.16 408.036 6
 2 -32 4 1070.46 414.462 6
 -2 -32 4 1161.73 459.858 5
 2 -32 4 878.209 404.956 5
 -2 -32 -4 855.551 454.775 1
 -2 -32 -4 949.181 403.856 3
 2 -32 5 880.01 428.114 6
 -2 -32 -5 735.579 488.247 1
 -2 -32 5 584.561 372.307 5
 -2 -32 -5 337.248 372.962 3
 -2 -32 5 800.457 362.903 6
 2 -32 5 480.913 409.343 5
 -2 -32 -6 135.389 382.399 3
 -2 -32 -6 28.1132 423.749 1
 2 -32 6 366.62 405.462 5
 2 -32 6 305.387 375.297 6
 -2 -32 6 342.966 384.904 6
 2 -32 7 492.684 439.457 6
 -2 -32 -7 209.945 360.347 3
 -2 -32 7 139.384 402.456 6
 -2 -32 -8 23333.3 1221.8 3
 -2 -32 8 25684.8 1491.06 6
 2 -32 8 26857.1 1523.28 6
 2 -32 9 35455.3 1756.64 6
 -2 -32 9 34540.8 1719.35 6
 -2 -32 10 33812.1 1687.53 6
 2 -32 10 34498.5 1707.28 6
 -2 -32 11 16847.2 1188.19 6
 2 -32 11 16089.9 1164.19 6
 2 -32 12 4357.97 616.731 6
 -2 -32 12 4242 632.911 6
 2 -32 13 101.129 295.761 6
 -2 -32 13 62.7572 296.104 6
 -2 -32 14 343.326 267.126 6
 2 -32 14 267.448 254.606 6
 2 -34 0 92972.6 2356.26 5
 -2 -34 0 93439.1 2292.63 3
 2 -34 1 26356.7 1309.14 5
 2 -34 -1 27814.9 1333.94 5
 -2 -34 1 25766.6 1277.86 5
 -2 -34 -1 25902.1 1256.01 3
 -2 -34 1 24850.2 1185.33 3
 -2 -34 2 55176 1853.25 5
 -2 -34 2 53047.9 1663.37 3
 2 -34 2 56552.9 1877.11 5
 -2 -34 -2 58152.4 1873.84 3
 -2 -34 3 1502.04 457.387 5
 2 -34 3 919.077 396.461 5
 -2 -34 -3 1099.93 424.795 3
 2 -34 4 -9.77848 410.013 5
 2 -34 4 268.176 336.38 6
 -2 -34 4 -198.877 381.417 5
 -2 -34 4 432.3 339.444 6
 -2 -34 -4 -194.735 409.951 3
 -2 -34 -5 -74.2759 385.297 3
 2 -34 5 -259.197 381.8 6
 -2 -34 5 65.1621 308.974 6
 2 -34 5 68.0707 387.752 5
 2 -34 6 6739.13 761.11 5
 -2 -34 -6 8084.96 762.692 3
 2 -34 6 8314.98 881.084 6
 -2 -34 6 8188.85 859.651 6
 2 -34 7 3263.26 620.967 6
 -2 -34 -7 3039.14 498.896 3
 -2 -34 7 3249.56 610.266 6
 -2 -34 8 24933 1463.65 6
 2 -34 8 24637.5 1439.74 6
 -2 -34 9 23839.4 1451.65 6
 2 -34 9 21904.9 1365.76 6
 -2 -34 10 51459 2057.23 6
 2 -34 10 48118 1941.49 6
 -2 -34 11 11395 965.452 6
 2 -34 11 10265.7 913.785 6
 2 -34 12 8447.21 801.703 6
 -2 -34 12 10011 849.498 6
 2 -34 13 791.539 315.189 6
 -2 -34 13 825.206 320.368 6
 -2 -34 14 163.142 232.851 6
 2 -36 0 87527.4 2340.75 5
 -2 -36 0 84414.6 2271.73 5
 -2 -36 0 87901.8 2232.93 3
 2 -36 1 19702.9 1157.69 5
 -2 -36 -1 18320 1093.04 3
 -2 -36 1 16855.1 1010.5 3
 -2 -36 1 17528.2 1087.14 5
 2 -36 -1 19620.2 1165.76 5
 2 -36 -2 4469.99 667.111 5
 -2 -36 2 3618.54 487.942 3
 -2 -36 -2 4083.95 597.783 3
 -2 -36 2 4490.52 632.343 5
 2 -36 2 3975.91 606.133 5
 2 -36 3 316.566 413.043 5
 -2 -36 3 816.843 372.886 5
 -2 -36 -3 740.667 407.179 3
 2 -36 -3 910.135 450.8 5
 -2 -36 4 1990.59 468.664 5
 -2 -36 4 1753.21 419.374 6
 -2 -36 -4 2084.22 486.181 3
 2 -36 4 1883.28 485.22 5
 2 -36 5 3183.64 583.288 6
 -2 -36 -5 3920.56 569.795 3
 2 -36 5 3490.48 591.384 5
 -2 -36 5 3618.78 575.956 6
 -2 -36 -6 -198.491 420.019 3
 2 -36 6 224.029 338.596 6
 -2 -36 6 314.478 314.24 6
 2 -36 7 -222.105 410.091 6
 -2 -36 7 49.6669 308.169 6
 -2 -36 8 17246.5 1171.95 6
 2 -36 8 18095.8 1222.53 6
 -2 -36 9 8885.19 871.727 6
 2 -36 9 8963.19 893.35 6
 -2 -36 10 26223.4 1361.34 6
 2 -36 10 26274 1408.83 6
 2 -36 -11 3706.18 478.811 5
 -2 -36 11 4258.4 591.719 6
 2 -36 11 3597.95 576.244 6
 2 -36 12 3122.62 494.98 6
 -2 -36 12 3687.7 510.163 6
 -2 -36 13 -196.823 281.065 6
 -2 -38 0 54510.3 1820.35 5
 -2 -38 0 55752.4 1771.53 3
 2 -38 0 52804 1832.65 5
 -2 -38 -1 1499.18 468.239 5
 2 -38 1 1519.54 475.326 5
 -2 -38 1 1374.31 429.04 5
 -2 -38 -1 1008.48 389.232 3
 2 -38 -1 1403.17 489.98 5
 -2 -38 2 214.009 343.961 5
 2 -38 2 -9.58208 382.051 5
 2 -38 -2 276.538 385.166 5
 -2 -38 -2 -72.5055 344.174 3
 2 -38 -3 1589.77 500.088 5
 -2 -38 -3 935.135 394.577 3
 2 -38 3 825.46 367.989 5
 -2 -38 3 657.735 353.549 5
 -2 -38 -4 24440.6 1252.69 3
 2 -38 4 20153.3 1185.88 5
 -2 -38 4 19686.6 1147.56 5
 2 -38 -4 23839.7 1291.63 5
 2 -38 5 678.119 369.595 5
 -2 -38 5 571.85 338.117 6
 2 -38 -5 1517.36 503.016 5
 2 -38 -6 17688.5 1123.77 5
 -2 -38 6 15159.1 1046.49 6
 2 -38 -7 490.339 394.896 5
 -2 -38 7 -155.255 297.38 6
 2 -38 -8 6160.74 699.405 5
 -2 -38 8 5621.74 667.525 6
 2 -38 -9 1739.7 430.387 5
 -2 -38 9 1141.53 382.123 6
 2 -38 -10 8351.61 672.048 5
 -2 -38 10 7997.21 738.526 6
 -2 -38 11 198.828 258.062 6
 2 -38 -11 187.534 244.8 5
 -2 -38 12 -295.251 271.001 6
 -2 -40 0 367.318 357.623 5
 2 -40 0 359.253 371.881 5
 -2 -40 -1 6.86245 328.053 5
 -2 -40 1 259.581 318.547 5
 2 -40 1 -72.0505 352.574 5
 2 -40 -1 -8.92292 354.057 5
 2 -40 -2 6783.16 730.52 5
 2 -40 2 5651.82 656.145 5
 -2 -40 2 6107.26 671.413 5
 -2 -40 -2 6677.71 713.063 5
 -2 -40 -3 1289.53 476.645 5
 2 -40 3 1092.5 416.876 5
 -2 -40 3 774.058 368.001 5
 2 -40 -3 1159.25 464.578 5
 -2 -40 4 33572.9 1427.3 5
 2 -40 4 35329.9 1503.72 5
 2 -40 -5 2370.7 559.31 5
 2 -40 -6 16273.4 1061.41 5
 2 -40 -7 605.149 388.751 5
 2 -40 -8 913.648 377.327 5
 2 -40 -9 252.707 330.375 5
 2 -40 -10 126.245 239.499 5
 2 -42 0 172.954 328.393 5
 -2 -42 0 423.637 335.741 5
 2 -42 -1 537.957 359.331 5
 -2 -42 1 191.403 318.787 5
 2 -42 1 -11.1676 331.289 5
 -2 -42 -1 865.82 394.981 5
 2 -42 -2 5598.2 657.75 5
 -2 -42 2 4679 565.468 5
 -2 -42 -2 5570.87 651.431 5
 2 -42 2 4961 596.434 5
 -2 -42 -3 1273.08 449.558 5
 -2 -42 3 457.519 300.24 5
 2 -42 3 763.698 374.675 5
 2 -42 -3 906.433 415.34 5
 2 -42 -4 45659.8 1665.8 5
 -2 -42 -4 44109.1 1621.91 5
 2 -42 -5 2238.22 519.978 5
 -2 -42 -5 2078.87 496.156 5
 -2 -42 -6 26273.1 1227.37 5
 2 -42 -6 26260.2 1252.96 5
 2 -42 -7 379.857 326.509 5
 -2 -42 -7 151.385 293.104 5
 2 -42 -8 1353.52 365.528 5
 -2 -42 -8 1243.58 368.942 5
 -2 -42 -9 164.262 262.556 5
 2 -42 -9 -33.9602 221.641 5
 -2 -44 0 2657.64 477.225 5
 2 -44 0 2250.7 439.164 5
 2 -44 -1 20.5871 331.004 5
 2 -44 1 173.46 306.453 5
 -2 -44 -1 455.75 316.212 5
 -2 -44 1 89.2373 311.257 5
 -2 -44 2 2795.52 433.217 5
 -2 -44 -2 3321.65 501.415 5
 2 -44 -2 2926.23 477.907 5
 2 -44 2 2544.56 454.646 5
 -2 -44 3 340.789 249.916 5
 2 -44 -3 639.447 358.476 5
 -2 -44 -3 1029.34 400.574 5
 2 -44 3 650.652 322.378 5
 2 -44 -4 23938 1150.33 5
 -2 -44 -4 24545.6 1154.58 5
 2 -44 -5 2004.89 459.585 5
 -2 -44 -5 1765.28 447.293 5
 -2 -44 -6 26569.4 1134.75 5
 2 -44 -6 25315.3 1136.63 5
 2 -44 -7 884.236 320.381 5
 -2 -44 -7 855.039 326.412 5
 -2 -44 -8 349.677 254.61 5
 2 -44 -8 393.877 248.903 5
 2 -46 0 17413.3 951.526 5
 -2 -46 0 16827.6 917.713 5
 -2 -46 -1 843.435 313.208 5
 2 -46 1 863.632 318.709 5
 2 -46 -1 482.154 285.412 5
 -2 -46 1 547.76 277.383 5
 2 -46 -2 301.018 264.205 5
 2 -46 2 497.246 266.848 5
 -2 -46 2 326.693 237.999 5
 -2 -46 -2 666.888 322.763 5
 -2 -46 -3 148.731 261.078 5
 2 -46 -3 -200.577 322.867 5
 -2 -46 -4 6571.24 585.173 5
 2 -46 -4 6511.95 595.895 5
 -2 -46 -5 1361.88 342.955 5
 2 -46 -5 993.72 341.86 5
 2 -46 -6 9265.03 654.921 5
 -2 -46 -6 9760.27 648.852 5
 2 -48 0 12995.3 753.202 5
 2 -48 -1 4641.62 486.693 5
 2 -48 -2 4498.93 473.553 5
 -3 1 0 1719.24 118.072 1
 3 -1 0 1602.9 86.5073 2
 -3 -1 0 1356.56 150.232 1
 -3 1 1 183882 1337.32 1
 -3 -1 1 184540 1461.49 1
 -3 -1 2 9319.65 402.762 1
 -3 1 2 9491.06 420.238 1
 -3 -1 3 16181.2 625.651 1
 -3 1 3 14699.6 649.758 1
 -3 -1 4 5042.99 269.428 2
 -3 1 4 4803.72 279.043 2
 -3 1 4 5994.46 540.478 1
 -3 -1 4 5819.72 517.259 1
 -3 1 5 3740.19 268.248 2
 3 -1 5 3736.62 349.218 2
 -3 1 5 3727.89 525.949 1
 -3 -1 5 3767.86 272.807 2
 -3 -1 5 3979.01 505.624 1
 -3 -1 6 4501.28 570.664 1
 -3 -1 6 3981.29 318.989 2
 -3 1 6 3538.84 548.605 1
 -3 1 6 3414.35 317.7 2
 3 -1 6 3871.19 390.697 2
 -3 1 7 14673.6 592.952 2
 -3 -1 7 13101.9 945.634 1
 3 -1 7 14466.4 704.745 2
 -3 -1 7 14930 602.525 2
 3 1 7 15391.6 733.249 2
 -3 1 7 14111 944.141 1
 -3 -1 8 1180.8 260.888 2
 3 -1 8 1475.51 334.991 2
 -3 -1 8 1619.66 490.489 1
 -3 1 8 1157.29 256.092 2
 3 1 8 1130.03 325.395 2
 3 1 9 105446 2137.71 2
 3 -1 9 107911 2124.13 2
 -3 -1 9 103228 1866.73 2
 -3 1 9 100561 1794.56 2
 3 -1 10 470.856 323.098 2
 3 1 10 425.796 296.437 2
 -3 1 10 371.366 218.505 2
 3 1 11 55360.7 1767.47 2
 3 -1 11 55553.6 1777.17 2
 3 1 12 398.884 305.851 2
 3 -1 12 234.137 294.782 2
 -3 -1 12 1011.26 591.29 6
 3 -1 12 1458.53 602.764 4
 3 1 13 7366.23 781.198 2
 3 -1 13 10892.2 1148.39 4
 3 1 13 10167.9 1052.45 4
 -3 -1 13 10026.7 1049.68 4
 -3 -1 13 8523.03 938.494 6
 -3 1 14 465.432 540.744 4
 3 -1 14 -461.494 586.217 4
 3 1 14 977.369 628.204 4
 -3 -1 14 282.245 485.665 4
 -3 -1 15 566.015 501.798 4
 -3 1 15 1979.86 651.184 4
 3 1 15 1405.97 573.948 4
 3 -1 15 1464.13 632.046 4
 3 -1 16 -295.302 566.473 4
 3 1 16 -521.858 654.379 4
 -3 1 16 -512.126 550.536 4
 -3 -1 16 -383.202 523.373 4
 -3 -1 17 8538.71 1000.19 4
 3 1 17 9073.38 1104.02 4
 3 -1 17 9758.4 1112.03 4
 -3 1 17 8705.94 1054.93 4
 3 -1 18 -104.747 424.031 4
 -3 1 18 388.467 420.261 4
 -3 -1 18 177.205 356.557 4
 3 1 18 -272.425 503.08 4
 3 1 19 5376.67 790.727 4
 3 -1 19 4460.77 716.085 4
 -3 3 0 57436.9 515.372 1
 -3 -3 0 54226.5 920.153 1
 -3 -3 1 2636.35 232.346 1
 -3 3 1 2531.2 214.051 1
 -3 3 2 7151.03 409.052 1
 -3 -3 2 7100.73 385.812 1
 -3 3 3 93344 1572.67 1
 -3 -3 3 94436.3 1444.42 1
 -3 -3 4 3307.17 395.937 1
 -3 3 4 3477.54 427.742 1
 -3 -3 5 30587.9 1111.82 1
 -3 3 5 32505.2 1131 1
 3 -3 5 29801.5 818.247 2
 -3 -3 6 444.196 349.181 1
 3 -3 6 659.084 250.192 2
 -3 3 6 821.838 372.798 1
 -3 3 7 34678.6 938.304 2
 3 -3 7 36500.8 1066.37 2
 -3 -3 7 36505.3 1485.42 1
 3 -3 8 3330.15 408.327 2
 -3 3 8 3088.57 331.254 2
 -3 -3 8 2232.37 577.805 1
 -3 -3 9 39925.9 1749.09 1
 -3 3 9 36682.8 1093.81 2
 3 -3 9 35096.1 1542.44 4
 3 3 9 37948.3 1328.48 2
 3 -3 9 38966.1 1302.7 2
 3 -3 10 2165.49 519.852 4
 -3 3 10 1951.02 327.402 2
 3 -3 10 2329.56 440.024 2
 3 3 10 1956.36 389.577 2
 3 -3 11 10168.6 808.102 2
 -3 -3 11 11153.1 974.803 6
 3 3 11 10220.9 800.862 2
 3 -3 11 11356.3 1011.98 4
 3 -3 12 1063.45 560.29 4
 -3 -3 12 794.972 507.53 4
 3 3 12 98.5023 292.567 2
 -3 -3 12 838.165 574.431 6
 3 -3 13 34.1215 436.884 4
 -3 -3 13 598.58 513.78 4
 -3 -3 13 24.8059 444.548 6
 3 3 13 73.829 298.297 2
 -3 -3 14 -376.539 548.337 4
 3 -3 14 -226.317 532.755 4
 3 3 14 -57.2267 326.666 2
 -3 -3 14 -108.808 531.854 6
 -3 -3 15 735.498 491.577 4
 3 -3 15 1335.28 558.614 4
 3 3 15 3064.11 790.312 4
 -3 3 15 2322.76 699.351 4
 -3 3 16 492.361 499.139 4
 -3 -3 16 -4.84295 427.135 4
 3 -3 16 274.6 499.494 4
 3 3 16 -113.327 503.429 4
 -3 -3 17 594.826 441.015 4
 3 3 17 605.085 554.701 4
 3 -3 17 364.266 475.993 4
 -3 3 17 210.118 443.178 4
 -3 3 18 72.0055 394.518 4
 3 3 18 102.446 437.258 4
 3 -3 18 580.316 434.044 4
 3 3 19 7952.87 942.695 4
 3 -3 19 7499.85 896.172 4
 -3 -5 0 234.163 219.224 1
 -3 -5 1 77223.9 1199.76 1
 -3 -5 2 2101.52 287.678 1
 3 -5 2 2033.36 158.038 1
 3 -5 3 260063 2008.64 1
 -3 -5 3 263756 2427.03 1
 -3 -5 4 17831.8 790.611 1
 3 -5 4 18043.8 695.9 1
 3 -5 5 8716.82 470.112 2
 -3 -5 5 9056.94 659.728 1
 -3 -5 6 3137.49 498.318 1
 3 -5 6 3259.63 357.423 2
 -3 -5 7 21.3623 340.316 1
 3 -5 7 56.3968 196.532 2
 -3 5 8 9014.52 551.796 2
 3 -5 8 9639.42 636.806 2
 -3 -5 8 9350.25 885.55 1
 -3 5 9 7024.61 513.426 2
 -3 -5 9 7834.86 849.214 1
 3 -5 9 7880.54 832.08 4
 3 -5 9 7282.77 613.482 2
 -3 5 10 30.8942 180.647 2
 -3 -5 10 550.246 381.25 4
 3 -5 10 -242.528 366.768 6
 -3 -5 10 163.424 367.746 1
 3 -5 10 522.208 465.619 4
 3 5 10 -41.1083 294.749 2
 -3 -5 11 3807.57 668.21 4
 3 -5 11 1639.92 555.412 4
 -3 -5 11 5077.79 729.652 6
 3 5 11 2970.12 500.116 2
 3 5 12 1673.84 430.62 2
 -3 -5 12 1933.7 634.2 6
 3 -5 12 1485.72 573.746 4
 -3 -5 12 1674.92 554.092 4
 -3 -5 13 12213.6 1183.22 4
 3 -5 13 11971.3 1190.35 4
 -3 -5 13 11800.2 1083.11 6
 3 5 13 11070 937.595 2
 -3 -5 14 1648.61 561.087 4
 3 -5 14 1213.9 604.768 4
 -3 -5 14 722.253 457.553 6
 3 5 14 933.07 391.208 2
 3 -5 15 7364.92 1008.76 4
 -3 -5 15 7750.99 1012.33 4
 -3 -5 15 4789.1 801.238 6
 3 5 15 8905.13 1177.12 4
 -3 -5 16 -22.5476 407.799 4
 3 5 16 593.162 615.637 4
 3 -5 16 2.44239 434.629 4
 -3 5 16 933.832 602.972 4
 3 5 17 140.286 495.832 4
 -3 5 17 -358.087 538.984 4
 3 -5 17 9.78629 439.265 4
 -3 5 18 604.229 474.899 4
 3 -5 18 697.721 439.159 4
 3 5 18 795.337 549.202 4
 3 5 19 1526.84 542.768 4
 -3 5 19 791.705 397.289 4
 -3 -7 0 5665.96 437.236 1
 3 -7 1 157213 911.212 1
 -3 -7 1 170217 1953.17 1
 3 -7 2 1025.97 141.218 1
 -3 -7 2 871.268 264.637 1
 -3 -7 3 92105.9 1594.94 1
 3 -7 3 105117 1404.97 1
 3 -7 4 78850.3 1547.67 1
 -3 -7 4 79837.5 1571.8 1
 3 -7 5 4093.66 470.506 1
 -3 -7 5 4341.12 484.776 1
 3 -7 6 5742.15 534.22 1
 -3 -7 6 5115.79 574.645 1
 -3 -7 7 13807.8 949.425 1
 -3 -7 8 607.525 403.072 1
 -3 -7 9 10023.6 978.611 1
 3 -7 9 8473.23 879.606 4
 -3 7 10 1108.43 303.905 2
 3 -7 10 1025.88 477.885 4
 -3 -7 10 1774.26 550.767 1
 -3 -7 10 978.677 418.228 4
 3 -7 10 1064.73 361.928 6
 3 7 11 28878.3 1381.17 2
 3 -7 11 27895 1624.13 4
 -3 -7 11 24344.9 1480.14 4
 -3 -7 11 31777.5 1592.4 6
 3 -7 11 24544.6 1309.14 6
 -3 -7 12 5399.8 774.711 4
 3 -7 12 5039.96 644.523 6
 3 7 12 6015.62 710.306 2
 3 -7 12 4901.11 805.917 4
 -3 -7 12 5610.01 821.032 6
 3 7 13 14831.7 1112.32 2
 -3 -7 13 16826.5 1372.79 4
 -3 -7 13 15645.9 1228.58 6
 3 -7 13 16731.9 1384.66 4
 3 7 14 4522.46 674.495 2
 -3 -7 14 6932.17 939.099 4
 3 -7 14 6454.89 974.99 4
 -3 -7 14 6510.15 832.931 6
 3 7 15 31253.6 1954.57 4
 -3 -7 15 28392.8 1745.36 4
 -3 -7 15 27590.5 1512.31 6
 3 -7 15 27541.4 1769.51 4
 -3 -7 16 1600.24 534.209 4
 3 7 16 2800.87 794.181 4
 3 -7 16 1478.5 614.692 4
 -3 7 16 3288.2 809.973 4
 3 7 17 381.714 527.271 4
 -3 7 17 934.554 598.864 4
 3 -7 17 -11.4329 412.974 4
 3 -7 18 491.602 466.712 4
 3 7 18 665.887 538.839 4
 -3 7 18 425.524 467.894 4
 3 7 19 2224.01 673.893 4
 -3 7 19 1607.62 488.044 4
 -3 -9 0 67654.8 1470.31 1
 -3 -9 -1 12966.1 706.809 1
 3 -9 1 13193 370.862 1
 -3 -9 1 11580.2 615.248 1
 -3 -9 2 31285.6 953.14 1
 3 -9 2 29698.7 557.494 1
 -3 -9 3 76118 1549.13 1
 3 -9 3 78341.9 1165.72 1
 3 -9 4 100706 1661.85 1
 -3 -9 4 100379 1772.68 1
 -3 -9 5 117563 2198.39 1
 3 -9 5 117851 2101.31 1
 -3 -9 6 18459.9 986.784 1
 3 -9 6 16574.6 906.825 1
 -3 -9 7 53563.1 1777.03 1
 3 -9 7 61344.7 1668.96 1
 -3 -9 8 1666.9 479.962 1
 -3 -9 9 2817.16 616.934 1
 -3 -9 9 4854.44 690.697 6
 3 -9 9 3034.58 623.104 4
 3 -9 9 2907.34 509.347 6
 -3 -9 10 5270.16 827.141 1
 -3 9 10 5484.52 538.604 2
 3 -9 10 6422.05 837.662 4
 3 -9 10 5368.77 671.846 6
 -3 -9 10 7954.32 854.911 6
 -3 -9 10 4795.58 669.678 4
 -3 -9 11 9551.96 1065.03 1
 3 9 11 11055.8 934.4 2
 -3 -9 11 9200.65 933.966 4
 3 -9 11 11527.2 951.601 6
 -3 -9 11 12716 1086.12 6
 3 -9 11 12628.9 1131.39 4
 3 9 12 11387.3 965.45 2
 3 -9 12 13274.5 1182.41 4
 3 -9 12 12935.4 981.061 6
 -3 -9 12 11321.7 1060.06 4
 -3 -9 12 12747.5 1098.23 6
 -3 -9 13 7970.5 953.911 4
 3 -9 13 8133.25 809.146 6
 3 9 13 7107.99 801.111 2
 -3 -9 13 7834.22 903.067 6
 3 -9 13 7666.37 973.557 4
 -3 -9 14 15116.7 1289.65 4
 -3 -9 14 14868 1161.4 6
 3 -9 14 15600.8 1392.06 4
 3 -9 15 13357.2 1333.54 4
 -3 -9 15 13031.8 1067.07 6
 3 9 16 3498.18 876.538 4
 -3 -9 16 2298.76 523.757 6
 3 -9 16 1829.96 602.118 4
 -3 9 17 11852.9 1263.88 4
 3 -9 17 10055.7 1104.56 4
 3 9 17 9508.15 1205.52 4
 -3 9 18 -781.647 559.923 4
 3 9 18 132.377 493.847 4
 3 9 19 1028.12 466.394 4
 3 -11 0 6774.94 439.614 1
 -3 -11 0 6881.38 568.803 1
 3 -11 1 4258.3 300.919 1
 -3 -11 -1 4711.57 525.517 1
 -3 -11 1 4710.34 486.119 1
 -3 -11 2 13628.6 732.746 1
 3 -11 2 10771.1 412.226 1
 3 -11 3 17396.3 568.608 1
 -3 -11 3 17383.4 810.634 1
 3 -11 4 58130.1 1217.98 1
 -3 -11 4 56109.7 1418.57 1
 -3 -11 5 37128.6 1264.47 1
 3 -11 5 38465.1 1189.41 1
 3 -11 6 85061.8 1963.25 1
 -3 -11 6 82923.2 2094.04 1
 -3 -11 7 1761.5 437.597 1
 3 -11 7 1797.94 359.846 1
 -3 -11 8 1797.13 489.746 6
 3 -11 8 567.616 363.152 4
 -3 -11 8 726.055 363.602 1
 3 -11 8 857.461 339.858 6
 -3 -11 9 3888.28 678.799 1
 3 -11 9 4648.2 672.707 4
 3 -11 9 4809.48 619.107 6
 -3 -11 9 5670.1 741.893 6
 -3 -11 10 1133.98 385.314 4
 -3 -11 10 2054.16 599.727 6
 3 -11 10 2798.14 533.959 6
 -3 -11 10 1530.07 515.921 1
 3 -11 10 2257.06 572.239 4
 -3 -11 11 1209.41 564.054 6
 3 -11 11 970.906 453.398 6
 -3 -11 11 1451.96 516.528 1
 -3 -11 11 868.59 415.022 4
 3 -11 11 617.98 473.706 4
 3 -11 12 716.155 406.17 6
 -3 -11 12 869.136 510.669 6
 3 11 12 931.398 415.713 2
 3 -11 12 829.348 505.235 4
 -3 -11 12 813.09 417.806 4
 3 -11 13 10588.9 1160.4 4
 3 11 13 8792.5 906.355 2
 3 -11 13 11678 962.252 6
 -3 -11 13 11695.7 1034.37 6
 -3 -11 13 12009.9 1125.34 4
 3 -11 14 3390.17 794.099 4
 -3 -11 14 1177.6 519.663 6
 3 -11 14 2805.26 549.517 6
 3 -11 15 6343.98 975.151 4
 -3 -11 15 6482.37 820.835 6
 3 -11 16 6371.86 971.369 4
 -3 -11 16 6685.56 788.26 6
 -3 11 17 755.746 577.432 4
 3 11 17 1590.39 715.276 4
 -3 11 18 540.818 480.638 4
 3 11 18 1004.55 579.102 4
 3 11 19 117.905 439.434 4
 -3 -13 0 240.11 324.477 1
 3 -13 0 295.582 244.653 1
 3 -13 1 6648.45 391.097 1
 -3 -13 -1 6209.38 621.706 1
 -3 -13 1 6293.53 557.386 1
 3 -13 2 2457.77 241.399 1
 -3 -13 2 2702.52 421.172 1
 3 -13 3 760.206 187.484 1
 -3 -13 3 594.178 292.617 1
 -3 -13 4 13818.4 780.631 1
 3 -13 4 13341.6 603.432 1
 -3 -13 5 16785.6 903.78 1
 3 -13 5 14745.4 724.101 1
 3 -13 6 12214.4 773.492 1
 -3 -13 6 10952.3 846.477 1
 3 -13 7 816.253 301.526 1
 -3 -13 7 948.687 378.935 1
 -3 -13 7 1686.56 510.486 6
 -3 -13 8 1629.41 492.095 6
 3 -13 8 1101.56 404.768 4
 3 -13 8 1077.91 372.326 6
 -3 -13 8 1129.77 409.659 1
 3 -13 8 1506.7 381.297 1
 -3 -13 9 7818.16 939.525 1
 3 -13 9 7424.46 850.834 4
 3 -13 9 7999.39 784.586 6
 -3 -13 9 8200.07 877.035 6
 3 -13 10 5739.46 811.095 4
 -3 -13 10 5567.79 861.977 1
 3 -13 10 5607.49 718.229 6
 -3 -13 10 7138.04 846.701 6
 -3 -13 11 2066.19 613.795 6
 3 -13 11 1745.43 551.157 4
 -3 -13 11 1018.81 542.235 1
 3 -13 11 1845.98 502.475 6
 -3 -13 12 -65.107 454.228 6
 3 -13 12 203.161 350.955 6
 3 13 12 115.849 347.82 2
 3 -13 12 -140.203 446.909 4
 3 -13 13 1305.94 453.339 6
 -3 -13 13 931.778 451.818 6
 3 13 13 1013.56 437.735 2
 3 -13 13 1263.26 565.937 4
 3 -13 14 4362.69 842.954 4
 3 -13 14 5289.27 678.723 6
 -3 -13 14 3756.11 669.062 6
 3 -13 15 994.715 414.369 6
 3 -13 15 1219.81 561.982 4
 -3 -13 15 2314.33 578.123 6
 -3 -13 16 1642.69 472.1 6
 3 13 16 2559.48 778.707 4
 -3 -13 17 -50.9846 292.271 6
 3 13 17 646.108 569.927 4
 -3 13 17 721.822 592.336 4
 -3 13 18 519.943 481.846 4
 3 13 18 33.6358 528.65 4
 3 13 19 89.502 412.799 4
 -3 -15 0 98322.3 2147.75 1
 3 -15 0 107125 1897.04 1
 3 -15 1 346.382 193.694 1
 -3 -15 -1 213.435 348.412 1
 -3 -15 1 290.286 292.767 1
 -3 -15 2 1935.18 402.407 1
 3 -15 2 1463.01 223.331 1
 -3 -15 -2 1600.93 431.759 1
 3 -15 3 1305.42 211.908 1
 -3 -15 3 1443.05 390.135 1
 -3 -15 4 7138.2 619.359 1
 3 -15 4 6289.38 427.705 1
 -3 -15 5 7237.41 634.411 1
 3 -15 5 6409.03 491.881 1
 -3 -15 6 13309.4 899.305 1
 3 -15 6 11425.5 738.05 1
 3 -15 7 120.797 203.388 1
 -3 -15 7 215.295 287.523 1
 3 -15 7 241.395 304.598 4
 3 -15 7 138.257 278.152 6
 -3 -15 7 130.684 375.64 6
 3 -15 8 24287.7 1391.74 4
 3 -15 8 25991.7 1239.11 6
 3 -15 8 24223.6 1125.97 1
 -3 -15 -8 23822 1049.02 3
 -3 -15 8 26825.2 1480.94 1
 -3 -15 8 25929.6 1393.52 6
 3 -15 9 7582.98 867.581 4
 3 -15 9 7880.98 781.393 6
 -3 -15 9 7382.43 857.823 6
 -3 -15 9 6904.35 865.061 1
 -3 -15 10 21398.2 1580.15 1
 -3 -15 10 24962.9 1430.8 6
 3 -15 10 24519.8 1330.91 6
 3 -15 10 22026.1 1471.71 4
 3 -15 11 953.467 515.975 4
 -3 -15 11 866.044 496.615 1
 3 -15 11 1773.71 504.421 6
 -3 -15 11 1358.44 537.808 6
 -3 -15 12 7801.79 880.806 6
 -3 -15 12 6520.38 991.912 1
 3 -15 12 7453.41 978.301 4
 3 -15 12 7901.69 867.778 6
 3 15 13 88.2225 344.607 2
 3 -15 13 6.93973 340.786 6
 3 -15 13 65.309 480.739 4
 -3 -15 13 -422.167 547.192 6
 -3 -15 14 2547.26 616.143 6
 3 -15 14 1644.9 470.021 6
 -3 -15 15 1673.83 499.454 6
 3 -15 15 1223.96 405.113 6
 -3 -15 16 1425.36 464.106 6
 3 15 17 1817.38 691.046 4
 -3 -15 17 764.994 349.791 6
 -3 15 18 7994.65 954.651 4
 3 15 18 5709.28 869.552 4
 3 -17 0 4632.69 461.951 1
 -3 -17 0 4390.94 540.951 1
 -3 -17 1 2772 447.589 1
 3 -17 1 2952.06 345.193 1
 3 -17 -1 2625.61 431.126 1
 -3 -17 -1 2580.18 485.693 1
 -3 -17 -2 3408.92 550.67 1
 3 -17 2 3472.73 331.433 1
 -3 -17 2 3621.75 505.041 1
 3 -17 3 757.461 188.798 1
 -3 -17 3 645.583 342.46 1
 3 -17 4 80483.6 1520.01 1
 -3 -17 4 95407.1 2204.34 1
 3 -17 5 1071.57 252.117 1
 -3 -17 5 1664.58 396.23 1
 3 -17 6 19164.8 983.994 6
 3 -17 6 16430.4 882.943 1
 3 -17 -6 19318.8 850.306 3
 -3 -17 -6 19119.4 925.169 3
 -3 -17 6 19970.4 1170.89 6
 -3 -17 6 20076 1152.97 1
 -3 -17 7 2390.04 540.049 6
 3 -17 7 2309.29 429.554 6
 -3 -17 -7 1970.07 394.508 3
 -3 -17 7 2254.45 486.282 1
 -3 -17 8 76408 2545.91 1
 3 -17 8 74401.1 2103.87 6
 -3 -17 -8 74906.5 1895.49 3
 -3 -17 8 76019.4 2379.84 6
 -3 -17 -9 5395.22 593.644 3
 -3 -17 9 3965.4 728.007 1
 -3 -17 9 4664.91 694.988 6
 3 -17 9 5630.36 689.051 6
 -3 -17 10 26423.9 1776.43 1
 3 -17 10 28736.2 1460.03 6
 -3 -17 10 28647.3 1538.07 6
 3 -17 11 3950.21 656.785 6
 -3 -17 11 2856.82 722.746 1
 -3 -17 11 3135.77 635.157 6
 -3 -17 12 1734.03 581.575 1
 3 -17 12 2735.76 559.533 6
 -3 -17 12 2059.29 532.572 6
 -3 -17 13 -328.28 493.703 6
 3 -17 13 309.543 342.699 6
 3 -17 14 2961.98 554.49 6
 -3 -17 14 3301.95 634.18 6
 3 -17 15 75.8538 345.336 6
 -3 -17 15 567.684 445.021 6
 -3 -17 16 3644.59 584.799 6
 3 -17 16 3169.61 519.832 6
 -3 -17 17 518.19 309.017 6
 3 17 17 1408.18 661.452 4
 3 17 18 11086.8 1108.25 4
 -3 17 18 14244.5 1163.9 4
 3 -19 0 569.709 256.798 1
 -3 -19 0 415.966 324.646 1
 -3 -19 -1 292.018 388.016 1
 -3 -19 1 78.5357 300.417 1
 3 -19 1 28.9674 176.178 1
 3 -19 -1 15.4294 264.534 1
 -3 -19 2 17285 1017.76 1
 -3 -19 -2 15246.3 1063.47 1
 3 -19 2 15442.8 699.688 1
 3 -19 3 405.108 169.684 1
 -3 -19 -3 511.378 364.83 1
 -3 -19 3 475.658 330.582 1
 -3 -19 4 645.091 337.725 1
 3 -19 -5 1070.79 327.228 3
 -3 -19 -5 1476.35 386.616 3
 -3 -19 5 1182.5 387.332 6
 -3 -19 5 1317.32 388.384 1
 3 -19 5 1403.05 378.481 6
 3 -19 6 20136.9 1038.99 6
 -3 -19 6 20736.6 1239.13 1
 3 -19 -6 20687.2 920.391 3
 -3 -19 6 20304 1200.25 6
 -3 -19 -6 20098.3 979.715 3
 3 -19 6 17630 955.699 5
 -3 -19 7 140.808 377.834 6
 -3 -19 7 72.0694 327.391 1
 3 -19 7 715.302 381.84 6
 -3 -19 -7 287.631 378.62 3
 -3 -19 -8 28879.6 1240.1 3
 3 -19 8 26961.2 1332.95 6
 -3 -19 8 28141.4 1483.1 6
 -3 -19 8 28398.1 1608.88 1
 -3 -19 9 375.4 432.648 1
 -3 -19 -9 858.244 394.127 3
 3 -19 9 986.007 460.794 6
 -3 -19 9 818.03 485.132 6
 -3 -19 10 11065.5 1256.66 1
 3 -19 10 13446.1 1043.04 6
 -3 -19 -10 13680.9 942.628 3
 -3 -19 10 12942.2 1041.48 6
 3 -19 11 302.914 375.129 6
 -3 -19 11 -471.878 532.408 6
 -3 -19 11 283.43 422.028 1
 3 -19 12 7738.51 834.528 6
 -3 -19 12 5776.58 787.388 6
 -3 -19 13 623.13 471.951 6
 3 -19 13 224.898 352.243 6
 -3 -19 14 3072.21 647.566 6
 3 -19 14 3195.36 607.52 6
 -3 -19 15 73.3921 355.608 6
 3 -19 15 129.357 328.224 6
 -3 -19 16 2944.55 537.194 6
 3 -19 16 2757.8 495.843 6
 -3 -19 17 4.12338 260.503 6
 3 19 17 655.452 489.601 4
 3 19 18 4587.04 700.179 4
 3 -21 0 723.61 258.548 1
 -3 -21 0 723.354 378.156 1
 3 -21 1 423.015 219.197 1
 3 -21 -1 522.453 281.192 1
 -3 -21 -1 445.687 376.223 1
 -3 -21 1 486.569 306.686 1
 3 -21 2 968.685 239.506 1
 -3 -21 2 1097.76 361.882 1
 -3 -21 -2 1049.65 329.229 3
 -3 -21 -2 1264.67 438.634 1
 3 -21 -2 853.421 319.513 1
 3 -21 3 469.785 307.561 5
 3 -21 3 486.119 272.288 6
 -3 -21 -3 856.371 342.569 3
 -3 -21 3 403.431 323.63 1
 -3 -21 -3 413.717 344.033 1
 3 -21 -3 409.195 216.888 3
 -3 -21 -4 5524.09 782.268 1
 3 -21 4 5953.99 583.415 6
 3 -21 4 6303.39 604.547 5
 3 -21 -4 5793.2 509.947 3
 -3 -21 -4 6875.57 611.007 3
 -3 -21 4 6932.48 722.447 1
 -3 -21 4 5056.03 571.941 6
 -3 -21 5 42.4736 340.141 6
 -3 -21 5 893.228 374.715 1
 3 -21 -5 271.968 231.723 3
 -3 -21 -5 618.084 349.609 3
 3 -21 5 350.723 269.932 6
 3 -21 5 379.261 300.981 5
 3 -21 -6 8516 643.52 3
 3 -21 6 9851.81 777.522 6
 -3 -21 6 9938.77 909.518 1
 -3 -21 -6 9426.1 717.162 3
 3 -21 6 7444.37 700.721 5
 -3 -21 6 8515.31 824.091 6
 -3 -21 7 2.6321 401.483 6
 3 -21 7 186.758 302.705 6
 -3 -21 7 121.51 325.729 1
 -3 -21 -7 18.6844 289.817 3
 -3 -21 8 -250.545 489.067 6
 -3 -21 -8 348.927 309.918 3
 -3 -21 8 32.008 336.293 1
 3 -21 8 217.59 347.026 6
 -3 -21 9 66.338 363.321 1
 -3 -21 9 -227.378 504.205 6
 -3 -21 -9 179.288 330.295 3
 3 -21 9 385.458 390.579 6
 3 -21 10 3704.52 636.118 6
 -3 -21 -10 4305.05 602.773 3
 -3 -21 10 2931.82 599.52 6
 -3 -21 10 2359.74 661.454 1
 3 -21 11 59.0165 444.08 6
 -3 -21 11 85.3214 413.228 6
 -3 -21 12 249.699 427.745 6
 3 -21 12 -105.758 405.435 6
 3 -21 13 610.068 399.627 6
 -3 -21 13 902.99 488.321 6
 -3 -21 14 9934.78 943.759 6
 3 -21 14 8769.11 856.928 6
 -3 -21 15 286.862 364.156 6
 3 -21 15 191.486 327.941 6
 -3 -21 16 533.833 353.754 6
 3 -21 16 441.119 288.186 6
 3 21 17 567.558 486.697 4
 -3 -21 17 -118.201 260.869 6
 -3 -23 0 531.669 372.931 1
 3 -23 0 533.688 244.404 1
 -3 -23 0 619.775 323.623 3
 3 -23 0 308.231 229.294 3
 3 -23 -1 123.583 220.013 1
 -3 -23 1 226.716 321.754 1
 3 -23 1 301.418 259.101 6
 -3 -23 -1 237.487 320.872 3
 3 -23 1 245.068 284.078 5
 3 -23 -1 115.861 248.651 3
 -3 -23 -1 108.431 293.2 1
 -3 -23 1 145.633 297.095 3
 3 -23 -2 26495.8 1030.25 3
 3 -23 2 24809.2 1137.06 6
 -3 -23 -2 26332.1 1459.72 1
 3 -23 2 26276 1104.71 5
 -3 -23 2 26139.3 1376.53 1
 3 -23 -2 24157.1 1287.23 1
 -3 -23 -2 24702.8 1088.17 3
 -3 -23 -3 1652.16 396.226 3
 3 -23 -3 1812.31 486.241 1
 -3 -23 3 1449.86 436.351 1
 -3 -23 -3 1332.03 488.745 1
 -3 -23 3 1419.78 363.101 6
 3 -23 3 1292.46 370.154 6
 3 -23 3 1655.32 413.447 5
 3 -23 -3 1134.04 309.46 3
 -3 -23 -4 34882.5 1853.45 1
 -3 -23 -4 35983 1306.14 3
 3 -23 -4 33628.2 1194.79 3
 -3 -23 4 38888.9 1682.3 1
 3 -23 4 35241.5 1389.12 6
 3 -23 4 38831.3 1468.46 5
 -3 -23 4 31999.3 1380.67 6
 3 -23 5 1137.2 395.685 5
 -3 -23 5 1118.89 418.141 6
 3 -23 -5 1296.64 336.525 3
 -3 -23 5 2020.89 488.616 1
 3 -23 5 1268.83 411.038 6
 -3 -23 -5 1387.56 565.484 1
 -3 -23 -5 1231.67 384.043 3
 3 -23 6 54760.4 1804.32 5
 -3 -23 6 56582.7 1976.68 6
 3 -23 6 56873.1 1862.81 6
 -3 -23 -6 55219.4 1646.84 3
 -3 -23 6 58643.6 2240.8 1
 -3 -23 -7 1695.27 420.763 3
 3 -23 7 2022.1 479.322 6
 -3 -23 7 1598.29 508.003 6
 -3 -23 7 1648.78 499.856 1
 -3 -23 8 563.57 455.245 6
 -3 -23 -8 670.135 380.629 3
 -3 -23 8 733.931 363.574 1
 3 -23 8 1195.37 472 6
 3 -23 9 562.765 410.918 6
 -3 -23 -9 747.163 360.591 3
 -3 -23 9 237.456 409.383 1
 -3 -23 9 1503.83 592.661 6
 -3 -23 -10 2557.62 530.508 3
 3 -23 10 2150.34 561.331 6
 -3 -23 10 2809.8 679.694 6
 -3 -23 11 793.568 563.213 6
 3 -23 11 90.1728 402.778 6
 -3 -23 12 13052.3 1105.55 6
 3 -23 12 14152 1136.86 6
 -3 -23 13 811.279 462.691 6
 3 -23 13 243.586 367.611 6
 -3 -23 14 7214.63 811.021 6
 3 -23 14 7177.03 800.809 6
 3 -23 15 954.702 381.374 6
 -3 -23 15 582.45 389.008 6
 -3 -23 16 8050.72 738.246 6
 3 -23 16 7469.76 670.733 6
 3 23 17 733.355 455.487 4
 -3 -23 17 -149.253 260.308 6
 -3 -25 0 3660.73 603.517 1
 3 -25 0 3104.28 423.295 3
 -3 -25 0 3370.09 490.457 3
 3 -25 1 3443.6 480.06 5
 -3 -25 1 3296.83 593.376 1
 3 -25 1 3095.1 484.637 6
 -3 -25 1 3690.49 505.517 3
 -3 -25 -1 3516.08 617.157 1
 3 -25 -1 3519.36 459.625 3
 -3 -25 -1 3347.34 507.863 3
 3 -25 1 2861.02 409.568 3
 3 -25 2 26122.4 1216.32 6
 3 -25 2 27455.8 1182.43 5
 -3 -25 2 27612.5 1488.93 1
 3 -25 -2 26841.3 1086.22 3
 -3 -25 -2 26713.3 1168.4 3
 3 -25 -2 25964.7 1326.77 1
 -3 -25 2 23760.9 1056.7 3
 -3 -25 -2 28548.6 1551.07 1
 3 -25 3 8125.02 731.689 5
 -3 -25 3 6279.74 655.573 6
 -3 -25 3 5864.67 549.358 3
 3 -25 -3 7398.73 617.535 3
 -3 -25 -3 7511.95 687.908 3
 -3 -25 3 7708.19 852.839 1
 3 -25 3 7601.72 708.443 6
 3 -25 -3 7419.68 823.056 1
 -3 -25 -3 7727.94 928.494 1
 -3 -25 3 6607.67 652.747 5
 -3 -25 4 89586.3 2641.59 1
 -3 -25 -4 86715.8 2054.42 3
 -3 -25 -4 85953 3021.86 1
 3 -25 4 89552.7 2309.94 6
 3 -25 -4 85887.9 1925.14 3
 3 -25 4 88534.3 2270.59 5
 -3 -25 4 81804.1 2189.69 6
 3 -25 -4 82491.6 2763.22 1
 3 -25 5 6007.55 702.513 5
 -3 -25 5 6911.48 821.13 1
 -3 -25 5 5639.32 697.793 6
 -3 -25 -5 5666.87 912.566 1
 3 -25 5 5894.73 664.104 6
 -3 -25 -5 6408.77 648.737 3
 3 -25 -5 5659.65 558.664 3
 -3 -25 -6 31233 1300.75 3
 -3 -25 6 32002.8 1745.18 1
 -3 -25 -6 29277.8 1979.33 1
 -3 -25 6 31284.7 1508.21 6
 3 -25 6 32357 1486.21 6
 3 -25 6 31466.8 1442.78 5
 -3 -25 -7 4314.12 577.437 3
 -3 -25 7 4527.92 737.619 1
 -3 -25 -7 4128.36 895.005 1
 3 -25 7 4794.58 665.261 6
 -3 -25 7 4914.78 717.044 6
 -3 -25 8 26327.1 1491.93 6
 -3 -25 -8 23845.3 1209.86 3
 3 -25 8 26531.2 1433.08 6
 -3 -25 9 1481.29 592.606 6
 3 -25 9 676.251 479.411 6
 -3 -25 -9 173.479 380.607 3
 3 -25 10 1285.35 480.306 6
 -3 -25 -10 256.301 380.086 3
 -3 -25 10 1117.01 539.702 6
 -3 -25 11 4112.58 726.059 6
 3 -25 11 4064.25 751.967 6
 3 -25 12 8790.09 914.461 6
 -3 -25 12 9183.62 936.751 6
 3 -25 13 1812.67 490.087 6
 -3 -25 13 1952.77 546.599 6
 -3 -25 14 26102.3 1377 6
 3 -25 14 25124.9 1353.29 6
 -3 -25 15 2359.13 487.14 6
 3 -25 15 2015.4 434.009 6
 -3 -25 16 5445.18 622.191 6
 3 -25 16 4878.64 552.216 6
 3 -27 0 9832.27 689.598 3
 -3 -27 0 11195.4 1019.11 1
 -3 -27 0 10514.7 771.62 3
 -3 -27 1 1846.1 491.433 1
 3 -27 1 2233.12 451.993 5
 -3 -27 -1 1610.78 489.604 1
 -3 -27 -1 2304.52 466.84 3
 3 -27 -1 1469.36 356.531 3
 3 -27 1 1579.71 409.201 6
 -3 -27 1 1494.78 397.486 3
 3 -27 2 23291.1 1193.48 6
 -3 -27 2 22429.7 1054.96 3
 -3 -27 -2 24961.6 1161.29 3
 -3 -27 2 27834.4 1557.31 1
 3 -27 -2 23814.3 1056.41 3
 -3 -27 -2 24188.3 1490.11 1
 3 -27 2 25446 1175.84 5
 -3 -27 3 10407 813.434 5
 -3 -27 3 11407.3 1035.07 1
 -3 -27 -3 11156.9 805.209 3
 3 -27 -3 9683.29 727.715 3
 -3 -27 -3 10013.8 1058.55 1
 3 -27 3 11393.8 850.721 5
 3 -27 3 9765.1 815.202 6
 -3 -27 3 10037.2 795.954 6
 -3 -27 3 8005.19 640.657 3
 3 -27 4 41849.8 1644.24 5
 -3 -27 -4 34635.5 2033.89 1
 3 -27 -4 35570.3 1869.39 1
 -3 -27 -4 38855.9 1437.28 3
 3 -27 -4 37546.4 1352.26 3
 3 -27 4 39348.1 1587.47 6
 -3 -27 4 40103.7 1828.45 1
 -3 -27 4 36131.1 1476.74 5
 -3 -27 4 38778.9 1565.17 6
 -3 -27 -5 5855.98 631.747 3
 3 -27 -5 5305.18 809.377 1
 3 -27 5 5846.59 701.43 5
 -3 -27 -5 5848.34 946.125 1
 3 -27 5 5698.64 693.144 6
 -3 -27 5 6134.01 717.841 6
 -3 -27 5 6411.25 791.483 1
 3 -27 -6 10087.2 1118.85 1
 -3 -27 6 11402.1 969.825 6
 3 -27 6 11357.9 968.953 6
 -3 -27 -6 9261.54 1221.56 1
 3 -27 6 10567.4 907.901 5
 -3 -27 -6 10686.4 828.877 3
 3 -27 7 7599.3 836.53 6
 -3 -27 -7 7161.43 709.059 3
 -3 -27 7 8062.3 883.765 6
 -3 -27 -7 7548.42 1154.85 1
 -3 -27 8 1468.6 547.799 6
 3 -27 8 940.296 443.074 6
 -3 -27 -8 997.506 651.302 1
 -3 -27 -8 1019.88 423.791 3
 -3 -27 -9 50.1744 561.389 1
 3 -27 9 122.352 437.04 6
 -3 -27 -9 -65.5484 407.688 3
 -3 -27 9 326.698 485.665 6
 -3 -27 -10 4272.6 617.573 3
 3 -27 10 5337.66 761.254 6
 -3 -27 10 5462.01 789.261 6
 -3 -27 11 2921.01 606.623 6
 3 -27 11 3369.25 639.275 6
 -3 -27 12 16141 1184.41 6
 3 -27 12 16345.6 1214.69 6
 3 -27 13 2071.57 519.928 6
 -3 -27 13 1501.12 481.14 6
 3 -27 14 13981 995.43 6
 -3 -27 14 15128.3 1045.93 6
 -3 -27 15 3668.84 559.165 6
 3 -27 15 3045.88 482.54 6
 3 -27 16 1148.76 296.285 6
 -3 -27 16 1715.9 367.431 6
 -3 -29 0 3698.11 521.467 3
 3 -29 0 4094.7 567.648 5
 -3 -29 0 3655.79 666.577 1
 -3 -29 1 495.045 335.011 3
 -3 -29 -1 410.035 341.755 3
 3 -29 1 840.969 405.531 5
 -3 -29 1 485.37 377.02 1
 -3 -29 -1 350.33 375.567 1
 -3 -29 2 4418.13 532.595 3
 -3 -29 -2 4792.98 748.076 1
 -3 -29 2 4758.41 731.816 1
 3 -29 -2 4431.97 522.613 3
 3 -29 2 4527.25 603.499 6
 -3 -29 -2 4349.84 581.169 3
 3 -29 2 5037.14 634.204 5
 3 -29 3 3335.05 522.021 6
 -3 -29 -3 3491.48 673.383 1
 -3 -29 3 3599.1 550.368 5
 -3 -29 -3 3486.7 544.753 3
 3 -29 3 3838.77 600.961 5
 -3 -29 3 3188.7 518.664 6
 -3 -29 3 2959.52 447.074 3
 -3 -29 3 3539.02 660.503 1
 -3 -29 4 711.459 366.57 1
 -3 -29 -4 759.904 465.686 1
 -3 -29 4 947.458 437.613 5
 -3 -29 -4 580.184 370.846 3
 -3 -29 4 699.597 339.742 6
 3 -29 4 668.808 387.81 5
 3 -29 4 590.228 344.737 6
 3 -29 5 1908.68 511.366 5
 -3 -29 -5 1670.91 461.938 3
 -3 -29 -5 1660.61 584.589 1
 3 -29 5 1733.92 487.385 6
 -3 -29 5 1939.74 493.885 6
 3 -29 6 12203.1 1019.52 6
 -3 -29 -6 10385.1 1313.09 1
 -3 -29 -6 12268.4 880.793 3
 -3 -29 6 12627.2 1014.87 6
 3 -29 6 11689 971.078 5
 -3 -29 -7 1239.46 657.824 1
 3 -29 7 664.01 419.501 6
 -3 -29 -7 705.52 400.682 3
 -3 -29 7 1247.71 492.292 6
 3 -29 8 15391.3 1200.71 6
 -3 -29 8 14885.4 1163.48 6
 -3 -29 -8 13805.1 958.917 3
 3 -29 9 1441.88 555.916 6
 -3 -29 -9 1531.95 438.46 3
 -3 -29 9 1535.67 538.093 6
 -3 -29 10 1705.17 525.863 6
 3 -29 10 2115.21 585.177 6
 -3 -29 11 73.3967 409.85 6
 3 -29 11 497.137 422.928 6
 -3 -29 12 1501.07 469.003 6
 3 -29 12 1589.7 499.043 6
 -3 -29 13 4108.55 627.174 6
 3 -29 13 3338.51 581.687 6
 -3 -29 14 2460.56 484.665 6
 3 -29 14 2452.22 473.964 6
 -3 -29 15 861.594 343.175 6
 3 -29 15 663.356 284.709 6
 3 -31 0 11646.1 872.634 5
 -3 -31 0 11386.6 847.174 3
 -3 -31 0 10552.4 1056.14 1
 3 -31 -1 12403.1 908.494 5
 -3 -31 -1 11479.2 1142.98 1
 3 -31 1 12451.6 910.647 5
 -3 -31 1 12250.6 855.373 3
 -3 -31 -1 12208.2 889.313 3
 -3 -31 1 11447.4 1089.54 1
 -3 -31 2 1613.31 438.639 5
 3 -31 2 1909.78 487.078 5
 -3 -31 -2 1318.79 420.995 3
 -3 -31 2 1559.86 389.373 3
 -3 -31 -2 1690.64 544.974 1
 -3 -31 -3 3565.73 728.902 1
 -3 -31 3 4570.12 629.688 5
 3 -31 3 4364.11 643.936 5
 -3 -31 -3 4181.69 584.654 3
 -3 -31 3 3497.22 530.043 6
 3 -31 3 3934.12 583.735 6
 3 -31 4 -448.672 455.305 5
 -3 -31 -4 31.1714 346.126 1
 -3 -31 4 35.0338 308.304 6
 -3 -31 -4 142.177 373.103 3
 3 -31 4 42.9871 332.17 6
 -3 -31 4 423.506 400.477 5
 -3 -31 5 6291.18 728.87 6
 -3 -31 -5 5695.78 947.763 1
 3 -31 5 6909.11 780.749 6
 3 -31 5 6678.26 766.957 5
 -3 -31 -5 6175.4 681.606 3
 -3 -31 6 8955.05 889.575 6
 -3 -31 -6 8312.5 780.503 3
 -3 -31 -6 7579.97 1108.06 1
 3 -31 6 9157.44 896.527 6
 3 -31 6 8665.01 866.633 5
 3 -31 7 10382 980.585 6
 -3 -31 7 10901.8 982.629 6
 -3 -31 -7 9563.26 819.213 3
 -3 -31 8 6514.41 801.073 6
 -3 -31 -8 6065.22 683.758 3
 3 -31 8 6427.2 833.78 6
 -3 -31 -9 14325.2 978.268 3
 -3 -31 9 13972.9 1147.05 6
 3 -31 9 14833.7 1181.43 6
 3 -31 10 9455.51 959.726 6
 -3 -31 10 9489.34 941.93 6
 3 -31 11 3035.73 596.949 6
 -3 -31 11 2447.63 553.909 6
 -3 -31 12 35.1049 371.132 6
 3 -31 12 228.912 360.975 6
 -3 -31 13 116.813 318.021 6
 3 -31 13 -45.979 316.748 6
 3 -31 14 547.58 305.661 6
 -3 -31 14 749.05 353.931 6
 -3 -31 15 436.612 260.401 6
 3 -33 0 18069.4 1104.88 5
 -3 -33 0 16844.5 1025.5 3
 -3 -33 1 30992.1 1326.02 3
 -3 -33 -1 32759.8 1404.41 3
 3 -33 -1 32259 1429.44 5
 3 -33 1 32699.6 1441.48 5
 -3 -33 2 20770 1066.55 3
 -3 -33 -2 22824 1194.73 3
 3 -33 2 22415.5 1206.91 5
 -3 -33 2 22085.2 1185.18 5
 3 -33 -2 24735.8 1278.74 5
 -3 -33 3 2011.97 484.393 5
 -3 -33 -3 1366.88 510.678 1
 3 -33 3 629.283 397.05 5
 -3 -33 -3 1272.15 454.065 3
 3 -33 4 793.954 412.937 6
 -3 -33 -4 333.038 403.91 1
 -3 -33 4 850.909 424.074 5
 3 -33 4 621.375 424.936 5
 -3 -33 4 659.927 339.964 6
 -3 -33 -4 463.828 386.671 3
 -3 -33 -5 7655.46 753.314 3
 -3 -33 -5 6235.89 996.559 1
 -3 -33 5 8050.77 809.551 6
 3 -33 5 7863.43 845.184 6
 3 -33 5 7867.91 835.625 5
 -3 -33 6 2975.56 577.353 6
 -3 -33 -6 2520.72 518.301 3
 3 -33 6 3471.81 619.66 6
 -3 -33 -7 4014.88 577.74 3
 3 -33 7 4457.25 676.621 6
 -3 -33 7 4535.02 683.502 6
 3 -33 8 12103.4 1048.52 6
 -3 -33 -8 11749.6 892.369 3
 -3 -33 8 11539.4 1021.06 6
 3 -33 9 23613.1 1414.72 6
 -3 -33 9 24294.3 1443.05 6
 3 -33 10 12576.1 1059.24 6
 -3 -33 10 13408.8 1085.06 6
 3 -33 11 11327.3 964.882 6
 -3 -33 11 12267 1027.93 6
 3 -33 12 2522.86 494.753 6
 -3 -33 12 2360.76 508.35 6
 -3 -33 13 2089.62 427.371 6
 3 -33 13 1563.56 386.848 6
 -3 -33 14 1163.49 330.137 6
 -3 -35 0 16631.7 1029.3 3
 3 -35 0 17773 1117.27 5
 -3 -35 1 48786.4 1739.49 5
 3 -35 1 51334.6 1796.75 5
 3 -35 -1 52519.3 1833.46 5
 -3 -35 -1 51202.1 1783.33 3
 -3 -35 1 50805.2 1682.99 3
 3 -35 -2 2835.45 570.842 5
 -3 -35 2 2668.37 522.757 5
 3 -35 2 3010.86 573.218 5
 -3 -35 2 1833.56 406.907 3
 -3 -35 -2 2505.22 512.985 3
 3 -35 3 -312.348 461.949 5
 3 -35 -3 519.843 444.735 5
 -3 -35 3 510.62 370.566 5
 -3 -35 -3 148.889 376.738 3
 -3 -35 4 2751.33 524.753 5
 3 -35 4 2687.16 543.091 5
 -3 -35 -4 3106.17 573.731 3
 3 -35 5 710.491 422.45 5
 -3 -35 5 474.093 324.952 6
 3 -35 5 550.174 376.999 6
 -3 -35 -5 155.776 366.591 3
 3 -35 6 366.852 371.041 6
 -3 -35 6 626.697 363.095 6
 -3 -35 -6 -36.1042 389.887 3
 -3 -35 -7 5376.33 642.668 3
 -3 -35 7 5786.99 736.334 6
 3 -35 7 5435.75 747.184 6
 3 -35 8 3552.99 624.465 6
 -3 -35 8 4261.43 673.384 6
 3 -35 9 26514.4 1472.45 6
 -3 -35 9 28242.4 1526.55 6
 -3 -35 10 7239.92 804.081 6
 3 -35 10 6181.73 756.089 6
 -3 -35 11 10910 895.708 6
 3 -35 11 10289.7 889.855 6
 3 -35 -11 9132.82 679.285 5
 3 -35 12 1197.21 382.097 6
 -3 -35 12 1698.89 401.516 6
 -3 -35 13 2052.1 385.284 6
 -3 -37 0 6845.86 716.625 5
 -3 -37 0 6240.42 669.24 3
 3 -37 0 6718 752.162 5
 3 -37 1 5651.87 687.483 5
 -3 -37 -1 5271.23 638.428 3
 -3 -37 1 5632.41 601.212 3
 -3 -37 1 5481.56 644.629 5
 3 -37 -1 6060.51 713.569 5
 -3 -37 2 152.243 245.048 3
 -3 -37 -2 -75.6232 371.265 3
 -3 -37 2 139.575 314.55 5
 3 -37 2 -468.872 468.266 5
 3 -37 -2 136.866 370.805 5
 -3 -37 3 1818.94 437.815 5
 3 -37 3 1102.68 385.556 5
 -3 -37 -3 1407.05 405.619 3
 3 -37 -3 1912.84 510.34 5
 -3 -37 4 -210.49 351.596 5
 3 -37 -4 411.336 416.414 5
 3 -37 4 83.2205 336.175 5
 -3 -37 -4 -63.633 379.492 3
 -3 -37 5 4225.64 579.331 6
 -3 -37 -5 4960.84 633.738 3
 3 -37 5 4496.67 634.116 5
 3 -37 -5 5463.95 720.138 5
 -3 -37 6 69.0943 282.252 6
 3 -37 -6 20.4339 390.598 5
 -3 -37 -6 -130.921 385.213 3
 3 -37 -7 737.133 412.109 5
 -3 -37 7 460.404 317.72 6
 -3 -37 8 835.339 387.929 6
 3 -37 -8 1416.7 445.123 5
 3 -37 -9 9682.8 782.794 5
 -3 -37 9 8597.39 815.775 6
 -3 -37 10 1185.7 391.348 6
 3 -37 -10 1006.18 340.181 5
 3 -37 -11 2088.98 355.917 5
 -3 -37 11 2860.36 474.646 6
 -3 -37 12 -17.7937 250.859 6
 -3 -39 0 687.783 373.614 5
 3 -39 0 599.702 414.912 5
 -3 -39 0 206.873 292.937 3
 3 -39 -1 1086.15 420.066 5
 -3 -39 1 1273.17 415.083 5
 -3 -39 -1 822.967 366.999 5
 3 -39 1 977.571 406.983 5
 -3 -39 -1 686.873 336.727 3
 3 -39 2 -541.723 418.455 5
 -3 -39 2 -112.705 325.081 5
 -3 -39 -2 78.1298 345.017 3
 3 -39 -2 10.9697 373.309 5
 -3 -39 3 8779.72 780.021 5
 3 -39 -3 10238.6 876.292 5
 -3 -39 -3 9986.92 823.137 3
 3 -39 3 8878.27 808.646 5
 3 -39 -4 713.53 433.669 5
 3 -39 4 413.915 357.429 5
 -3 -39 -4 354.361 342.306 3
 3 -39 -5 7203.51 770.618 5
 -3 -39 6 540.193 325.734 6
 3 -39 -6 1405.68 473.83 5
 3 -39 -7 1360.71 429.565 5
 -3 -39 7 774.505 317.231 6
 3 -39 -8 80.9828 316.662 5
 -3 -39 8 -168.644 317.678 6
 -3 -39 9 281.101 289.114 6
 3 -39 -9 498.809 308.984 5
 3 -39 -10 -97.4151 242.658 5
 -3 -39 10 -78.8023 257.632 6
 -3 -39 11 144.686 236.013 6
 3 -41 0 173.352 348.425 5
 -3 -41 0 470.684 351.359 5
 3 -41 1 6217.52 685.808 5
 -3 -41 -1 6459.18 691.057 5
 3 -41 -1 6460.04 695.223 5
 -3 -41 1 6327.51 653.218 5
 3 -41 -2 -52.4188 377.756 5
 -3 -41 -2 869.442 411.955 5
 3 -41 2 33.7261 330.163 5
 -3 -41 2 -114.993 346.066 5
 -3 -41 3 11943 861.858 5
 3 -41 -3 14812.3 1015.7 5
 3 -41 3 13475 956.122 5
 -3 -41 -3 15338.9 1015.62 5
 3 -41 -4 795.692 435.643 5
 3 -41 4 716.066 366.483 5
 -3 -41 -4 1350.01 476.931 5
 3 -41 -5 26072 1295.36 5
 3 -41 -6 317.605 363.705 5
 3 -41 -7 8652.53 745.277 5
 3 -41 -8 556.676 337.005 5
 3 -41 -9 697.724 299.381 5
 -3 -41 -10 105.235 237.951 5
 3 -43 0 -483.724 378.31 5
 -3 -43 0 6.5605 286.683 5
 3 -43 1 4158.64 563.803 5
 -3 -43 -1 4975.75 596.386 5
 3 -43 -1 4590.88 583.999 5
 -3 -43 1 4241.98 549.293 5
 -3 -43 2 -287.872 318.021 5
 3 -43 -2 253.793 359.031 5
 -3 -43 -2 404.856 337.632 5
 3 -43 2 230.262 313.82 5
 -3 -43 -3 13085.6 897.841 5
 3 -43 -3 12860.7 896.669 5
 3 -43 3 11065.3 817.666 5
 3 -43 -4 661.621 363.556 5
 -3 -43 -4 911.438 385.15 5
 3 -43 -5 17214.8 1008.78 5
 -3 -43 -5 17761.8 1007.21 5
 -3 -43 -6 837.178 375.959 5
 3 -43 -6 889.362 390.736 5
 3 -43 -7 5965.47 588.872 5
 -3 -43 -7 5949.34 591.636 5
 -3 -43 -8 230.803 264.876 5
 3 -43 -8 460.081 272.926 5
 -3 -43 -9 2532.35 378.32 5
 -3 -45 0 -7.85069 282.785 5
 3 -45 0 -219.799 293.422 5
 3 -45 1 -183.176 303.85 5
 -3 -45 1 -349.632 309.614 5
 3 -45 -1 -313.204 332.51 5
 -3 -45 -1 171.155 282.814 5
 3 -45 -2 -566.66 360.855 5
 -3 -45 2 -347.314 268.181 5
 -3 -45 -2 339.189 286.965 5
 3 -45 2 20.0663 255.065 5
 -3 -45 -3 3592.52 486.83 5
 3 -45 -3 3497.28 490.022 5
 3 -45 -4 240.718 310.953 5
 -3 -45 -4 463.097 315.293 5
 -3 -45 -5 7509.23 633.756 5
 3 -45 -5 6350.17 612.712 5
 3 -45 -6 549.188 291.795 5
 -3 -45 -6 581.092 290.664 5
 -3 -45 -7 4007.46 450.787 5
 3 -45 -7 3789.3 455.957 5
 -3 -47 0 820.199 269.118 5
 3 -47 0 681.249 286.707 5
 -3 -47 -1 4106.17 471.163 5
 3 -47 1 4246.41 474.275 5
 3 -47 -1 5188.96 531.034 5
 -3 -47 -2 20.9871 237.107 5
 3 -47 -2 -137.332 296.487 5
 3 -47 -3 -556.151 313.546 5
 -3 -47 -3 155.212 225.292 5
 3 -47 -4 -452.788 303.063 5
 -3 -47 -4 233.427 228.623 5
 -4 0 0 141735 1243.44 1
 -4 0 1 48.9606 133.422 1
 -4 0 -1 -50.5464 151.847 1
 -4 0 2 750972 3625.58 1
 -4 0 3 167.294 225.889 1
 -4 0 4 6897.02 562.842 1
 -4 0 4 6213.81 261.961 2
 -4 0 5 -9.96501 108.692 2
 -4 0 5 2.01059 292.568 1
 -4 0 6 4981.69 592.529 1
 -4 0 6 5084.78 319.264 2
 4 0 6 4881.15 418.014 2
 -4 0 7 -12.0773 344.432 1
 -4 0 7 165.127 163.95 2
 4 0 7 42.2428 199.61 2
 -4 0 8 17250 687.08 2
 4 0 8 16641.1 821.301 2
 -4 0 9 1105.2 473.348 1
 4 0 9 196.374 268.94 2
 4 0 10 40650.3 1457.54 2
 4 0 11 269.839 294.045 2
 4 0 12 26002.4 1526.77 4
 4 0 12 23334 1275.88 2
 -4 0 13 1521.47 604.548 6
 4 0 13 -135.84 320.328 2
 4 0 13 1030.72 556.835 4
 4 0 14 12023.9 1205.29 4
 -4 0 14 14514.6 1303 4
 4 0 15 -284.614 563.047 4
 -4 0 15 -241.667 434.743 4
 -4 0 16 5366.67 882.629 4
 4 0 16 6283.48 926.37 4
 4 0 17 74.3523 427.705 4
 -4 0 17 -58.9384 404.062 4
 4 0 18 262.703 440.416 4
 4 0 19 107.713 403.772 4
 4 -2 0 7064.98 208.065 2
 -4 2 0 7281.29 231.383 1
 -4 -2 0 6532.36 344.128 1
 -4 -2 -1 9346.65 459.038 1
 -4 2 -1 9152.55 300.058 1
 4 -2 1 8453.7 277.862 2
 -4 -2 1 8963.87 405.676 1
 -4 2 1 9203.88 350.121 1
 -4 -2 2 2738.74 274.988 1
 -4 2 2 2265.86 272.23 1
 -4 2 3 11615.4 580.37 1
 -4 -2 3 12011.9 562.462 1
 -4 2 4 119915 2059.38 1
 -4 -2 4 125922 1959.16 1
 4 -2 5 200.682 212.218 2
 -4 2 5 126.935 302.759 1
 -4 -2 5 289.643 323.489 1
 -4 2 5 200.141 137.507 2
 4 -2 6 17709.1 718.811 2
 -4 2 6 16299.2 941.613 1
 -4 2 6 16815.1 569.571 2
 -4 -2 6 15319.4 944.132 1
 -4 2 7 1716.93 463.457 1
 -4 2 7 1611.51 235.727 2
 4 -2 7 1528.74 317.551 2
 -4 -2 7 1610.04 452.888 1
 -4 2 8 25413.1 818.048 2
 4 -2 8 26018.3 1006.01 2
 4 2 8 25900 1042.94 2
 4 2 9 454.949 294.149 2
 -4 2 9 609.088 215.832 2
 4 -2 9 537.043 300.971 2
 -4 -2 9 803.965 436.388 1
 4 -2 10 25605 1441.75 4
 4 -2 10 29764.3 1241.87 2
 4 2 10 27898.5 1223.1 2
 4 -2 11 1024.45 396.361 2
 4 -2 11 1410.2 538.58 4
 4 2 11 902.225 338.753 2
 4 2 12 5577.58 667.49 2
 -4 -2 12 7132.75 899.036 6
 4 -2 12 7521.9 948.936 4
 4 -2 12 4926.83 641.995 2
 -4 -2 12 6021.07 846.87 4
 4 -2 13 -129.672 530.297 4
 4 2 13 1579.17 681.788 4
 -4 -2 13 2005.67 691.49 6
 4 2 13 440.4 334.745 2
 -4 -2 13 722.996 513.625 4
 4 -2 14 4413.19 831.024 4
 -4 -2 14 4657.34 765.205 6
 -4 -2 14 3664.34 794.61 4
 4 2 15 33.0273 558.379 4
 -4 2 15 1258.78 599.287 4
 4 -2 15 252.904 532.893 4
 -4 -2 15 -10.386 523.596 4
 4 2 16 11508.4 1236.33 4
 -4 -2 16 10893.7 1131.32 4
 4 -2 16 11421.6 1198.98 4
 -4 2 16 9365.13 1093.5 4
 4 2 17 -396.615 577.77 4
 4 -2 17 -278.694 550.428 4
 -4 2 17 -408.431 478.745 4
 -4 2 18 4602.05 706.257 4
 4 -2 18 6555.4 907.968 4
 4 2 18 5797.94 876.908 4
 4 2 19 318.179 405.07 4
 4 -2 19 -268.666 391.181 4
 -4 4 0 295161 1387.39 1
 -4 -4 0 282611 2363.73 1
 -4 4 1 1557.34 201.184 1
 -4 -4 -1 1314.17 265.619 1
 -4 -4 1 1304.36 239.145 1
 -4 -4 2 304179 2524.08 1
 -4 4 2 295402 2567.77 1
 -4 -4 3 6737.53 461.581 1
 -4 4 3 7139.91 507.455 1
 -4 4 4 40926.2 1197.5 1
 -4 -4 4 42754.7 1176.22 1
 -4 -4 5 6349.18 568.167 1
 -4 4 5 6353.27 608.706 1
 4 -4 5 6649.97 420.521 2
 -4 4 6 1585.9 410.344 1
 -4 -4 6 1049.17 406.037 1
 4 -4 6 975.377 270.196 2
 -4 -4 7 1065.08 432.419 1
 4 -4 7 1686.13 291.864 2
 -4 4 7 1554.67 244.763 2
 -4 4 8 2528.6 319.164 2
 -4 -4 8 3476.25 624.521 1
 4 -4 8 3090.18 429.802 2
 4 -4 9 2590.46 572.496 4
 4 4 9 1505.47 392.98 2
 -4 4 9 1375.28 269.994 2
 4 -4 9 1841.61 410.227 2
 -4 -4 9 919.975 521.174 1
 -4 -4 10 1694.17 524.57 1
 4 -4 10 2030.5 598.478 4
 4 4 10 1224.3 365.34 2
 4 -4 10 1396.09 368.288 2
 -4 -4 11 1197.06 493.518 4
 4 -4 11 229.279 434.006 4
 4 4 11 261.7 261.871 2
 -4 -4 12 1419.59 625.483 6
 4 -4 12 -698.229 613.609 4
 4 4 12 138.442 289.946 2
 -4 -4 12 615.836 458.252 4
 -4 -4 13 27.5458 449.195 4
 4 -4 13 104.104 425.936 4
 4 4 13 240.068 328.227 2
 -4 -4 13 539.603 524.774 6
 4 -4 14 2026.61 643.536 4
 4 4 14 3526.96 851.277 4
 -4 -4 14 1756.81 595.724 4
 4 4 14 1225.63 437.273 2
 -4 -4 14 1669.96 599.455 6
 -4 -4 15 -46.3809 453.955 6
 4 -4 15 996.895 601.474 4
 -4 -4 15 313.697 439.673 4
 -4 4 15 1580.39 634.18 4
 4 4 15 1600.89 668.131 4
 4 -4 16 834.65 548.378 4
 4 4 16 303.015 544.337 4
 -4 4 16 1456.54 625.573 4
 4 4 17 573.756 471.461 4
 4 -4 17 412.471 457.476 4
 -4 4 17 124.528 477.745 4
 -4 4 18 1064.47 481.984 4
 4 4 18 1174.63 563.776 4
 4 -4 18 1510.27 555.506 4
 4 4 19 142.072 380.537 4
 4 -4 19 169.191 415.895 4
 -4 -6 0 153631 1988.97 1
 -4 -6 1 591.084 233.044 1
 -4 -6 -1 573.162 282.34 1
 -4 -6 2 103962 1614.94 1
 -4 -6 3 13235.3 626.76 1
 4 -6 4 53614.7 1045.69 2
 -4 -6 4 62288.8 1415.7 1
 4 -6 5 788.424 213.676 2
 -4 -6 5 669.906 295.623 1
 4 -6 6 2821.33 345.182 2
 -4 -6 6 2881.83 474.99 1
 -4 -6 7 689.229 386.659 1
 4 -6 7 582.105 260.492 2
 -4 -6 8 3171.39 578.068 1
 4 -6 8 3616.19 447.939 2
 4 -6 9 2370.27 526.725 4
 -4 6 9 2033.11 332.103 2
 -4 -6 9 2319.72 575.627 1
 -4 -6 10 8577.02 826.742 4
 -4 -6 10 7945.43 956.914 1
 4 6 10 9126.14 781.846 2
 4 -6 10 7590.35 714.581 6
 4 -6 10 8888.07 936.121 4
 4 -6 11 4266.64 730.346 4
 -4 -6 11 3146.85 637.526 4
 -4 -6 11 5402.78 825.648 1
 4 6 11 4190.95 593.075 2
 -4 -6 11 5805.04 832.334 6
 4 -6 12 11638.8 1126.75 4
 4 6 12 11041.2 927.066 2
 -4 -6 12 13158.9 1178.97 6
 -4 -6 12 10185.8 1019.4 4
 -4 -6 13 1806.76 696.029 4
 4 6 13 1931.3 501.055 2
 4 -6 13 1674.71 581.513 4
 -4 -6 13 1741.58 589.135 6
 4 -6 14 4167.46 835.071 4
 -4 -6 14 4614.71 775.449 4
 4 6 14 3158.23 603.775 2
 -4 -6 14 3824.8 742.05 6
 4 6 15 2895.88 830.795 4
 -4 -6 15 1287.19 487.625 6
 4 -6 15 1302.65 570.851 4
 -4 6 16 1948.31 703.398 4
 4 -6 16 835.75 547.843 4
 4 6 16 1258.21 676.091 4
 4 -6 17 499.91 466.325 4
 -4 6 17 -304.845 494.765 4
 4 6 17 -182.465 583.038 4
 4 -6 18 3477.86 702.134 4
 4 6 18 3723.4 767.306 4
 -4 6 18 2510.04 629.017 4
 4 6 19 1126.73 477.948 4
 -4 -8 0 112622 1832.44 1
 -4 -8 1 45661.9 1135.39 1
 -4 -8 -1 46949 1288.88 1
 -4 -8 2 25958.6 882.071 1
 4 -8 2 19958.4 383.605 1
 -4 -8 3 53316.5 1297.04 1
 4 -8 3 49707.6 874.539 1
 4 -8 4 64471.5 1159.01 1
 -4 -8 4 60550.9 1419.32 1
 -4 -8 5 11939.3 766.49 1
 -4 -8 6 6497.35 656.725 1
 -4 -8 7 1924.2 454.63 1
 4 -8 8 2934.55 525.302 4
 -4 -8 8 2664.59 566.194 1
 -4 -8 9 4368.88 713.013 1
 4 -8 9 3366.26 524.158 6
 4 -8 9 3959.31 651.004 4
 -4 -8 10 35312.5 1596.67 6
 -4 -8 10 32551.7 1830.32 1
 4 -8 10 34125.2 1458.66 6
 4 -8 10 39136.1 1830.55 4
 4 8 11 20957.8 1244.23 2
 -4 -8 11 23190.2 1383.91 6
 4 -8 11 21063.6 1455.92 4
 -4 -8 11 18789.9 1403.13 1
 4 -8 11 21238.1 1203.33 6
 -4 -8 12 23671.1 1482.55 4
 -4 -8 12 26874.4 1562.88 6
 4 -8 12 26309.8 1365.16 6
 4 -8 12 27651.8 1677.47 4
 4 8 12 26062.4 1425.89 2
 -4 -8 13 2777.29 689.42 6
 4 -8 13 3099.23 720.267 4
 4 8 13 2490.88 545.611 2
 -4 -8 14 11953.9 1094.33 6
 4 -8 14 10776.3 1179.04 4
 4 8 15 2187.49 779.49 4
 -4 -8 15 1113.28 451.218 6
 4 -8 15 1293.56 615.486 4
 4 8 16 8740.4 1143.39 4
 4 -8 16 6341.75 942.045 4
 -4 8 16 8757.16 1123.05 4
 -4 -8 16 6354.56 762.303 6
 4 -8 17 1101.12 549.155 4
 4 8 17 1529.18 636.886 4
 -4 8 17 1760.2 647.387 4
 4 8 18 5523.83 871.203 4
 -4 8 18 3270.22 677.864 4
 4 8 19 2129.5 605.37 4
 -4 -10 0 40683.4 1224.11 1
 4 -10 0 45083.7 871.389 1
 4 -10 1 12407.9 307.403 1
 -4 -10 1 13624.2 709.881 1
 -4 -10 -1 13523.5 789.551 1
 4 -10 2 44105.8 632.792 1
 -4 -10 2 47545.9 1250.63 1
 4 -10 3 31079.9 739.168 1
 -4 -10 3 30051.9 1029.85 1
 -4 -10 4 7068.6 564.318 1
 4 -10 4 7173.73 464.669 1
 -4 -10 5 14252.6 824.602 1
 4 -10 5 16253.8 734.038 1
 -4 -10 6 13293.8 883.869 1
 -4 -10 7 3786.22 584.742 1
 -4 -10 8 2082.71 560.189 1
 4 -10 8 2526.9 499.223 4
 -4 -10 9 10212.4 1009.81 1
 4 -10 9 11631.9 1005.74 4
 4 -10 9 10812.7 820.298 6
 -4 -10 9 11595.8 952.203 6
 4 -10 10 21007.4 1189.57 6
 4 -10 10 22155.5 1412.64 4
 -4 -10 10 22350 1338.99 6
 -4 -10 10 18415 1449.37 1
 -4 -10 11 16770.2 1389.21 1
 4 -10 11 19044.1 1381.07 4
 4 -10 11 18875.6 1159.36 6
 -4 -10 11 21411.1 1361.54 6
 4 -10 12 2121 592.413 4
 4 10 12 2199.99 522.513 2
 4 -10 12 2491.51 526.69 6
 -4 -10 12 3208.97 706.192 6
 4 -10 13 8604.71 1063.66 4
 4 10 13 7187.55 849.763 2
 -4 -10 13 8822.01 956.679 6
 4 -10 13 9215.76 853.881 6
 4 -10 14 1317.38 602.278 4
 -4 -10 14 978.369 501.227 6
 4 -10 15 2942.9 754.844 4
 -4 -10 15 2694.77 593.949 6
 4 -10 16 5185.69 886.529 4
 -4 -10 16 5385.37 743.705 6
 -4 -10 17 1937.56 456.478 6
 4 10 17 870.896 616.696 4
 -4 10 17 2479.19 674.48 4
 -4 10 18 2026.62 585.012 4
 4 10 18 3678.07 784.487 4
 4 10 19 1792.36 537.859 4
 4 -12 0 7671.97 454.68 1
 -4 -12 0 7120.38 590.633 1
 4 -12 1 13294.4 433.986 1
 -4 -12 -1 15650.2 911.375 1
 -4 -12 1 15025 790.354 1
 -4 -12 2 2877.17 443.931 1
 4 -12 2 2054.98 173.697 1
 4 -12 3 4806.58 300.801 1
 -4 -12 3 4713.46 516.433 1
 -4 -12 4 2444.98 473.366 1
 4 -12 4 3480.23 350.227 1
 -4 -12 5 1860.34 403.793 1
 4 -12 5 2012.21 330.297 1
 -4 -12 6 7449.64 697.157 1
 4 -12 6 7730.56 584.217 1
 -4 -12 7 4712.06 626.682 1
 4 -12 8 3326.35 483.947 6
 4 -12 8 2773.11 517.026 4
 -4 -12 8 4324.78 648.789 6
 -4 -12 8 2394.95 568.92 1
 4 -12 9 10239.7 957.542 4
 -4 -12 9 8900.33 964.126 1
 -4 -12 9 11141.5 968.771 6
 4 -12 9 9580.06 811.847 6
 4 -12 10 4530.05 730.454 4
 -4 -12 10 3321.45 717.768 1
 4 -12 10 4575.98 626.186 6
 -4 -12 10 4999.7 784.604 6
 4 -12 11 1377.01 559.551 4
 -4 -12 11 1026.98 521.064 1
 4 -12 11 1062.13 451.301 6
 -4 -12 11 1185.33 601.353 6
 -4 -12 12 412.882 443.423 1
 4 -12 12 232.873 449.939 4
 4 12 12 193.187 361.802 2
 4 -12 12 118.472 375.421 6
 -4 -12 12 75.7142 486.319 6
 4 12 13 2046.98 520.78 2
 -4 -12 13 2441.3 606.763 6
 4 -12 13 2961.32 719.671 4
 4 -12 13 2760.62 568.974 6
 4 -12 14 1146.71 568.079 4
 4 -12 14 1342.6 415.2 6
 -4 -12 14 1200.13 513.661 6
 -4 -12 15 941.221 440.473 6
 4 -12 15 1698.02 643.575 4
 -4 -12 16 514.243 404.699 6
 4 12 16 1518.76 699.056 4
 4 12 17 2255.53 729.574 4
 -4 -12 17 1017.04 403.865 6
 -4 12 17 1646.54 628.614 4
 4 12 18 327.354 455.472 4
 -4 12 18 -208.213 446.484 4
 4 12 19 -39.5985 398.233 4
 4 -14 0 55.6748 190.911 1
 -4 -14 0 596.65 332.859 1
 4 -14 1 1515.56 201.052 1
 -4 -14 -1 996.536 407.919 1
 -4 -14 1 1339.34 358.961 1
 -4 -14 2 1444.11 387.743 1
 4 -14 2 1266.85 163.36 1
 -4 -14 -2 1499.47 445.225 1
 4 -14 3 4327.43 294.977 1
 -4 -14 3 5455.71 564.93 1
 -4 -14 4 2574.85 434.516 1
 4 -14 4 2500.88 279.333 1
 -4 -14 5 99223.6 2201.79 1
 4 -14 5 93041 1765.22 1
 -4 -14 6 3346.18 516.544 1
 4 -14 6 2664.09 376.292 1
 4 -14 7 3973.44 612.562 4
 -4 -14 7 5053.34 662.177 6
 4 -14 7 4263.66 519.742 6
 -4 -14 7 4064.94 597.887 1
 -4 -14 -8 570.263 293.323 3
 -4 -14 8 1315.27 529.681 6
 4 -14 8 817.98 344.724 6
 4 -14 8 682.778 419.848 4
 -4 -14 8 38.9632 348.651 1
 -4 -14 9 2085.09 577.303 1
 4 -14 9 1203.38 460.229 4
 4 -14 9 2291.78 486.75 6
 -4 -14 9 2026.52 568.88 6
 4 -14 10 849.505 394.671 6
 -4 -14 10 576.388 471.87 1
 -4 -14 10 630.706 532.874 6
 4 -14 10 608.033 466.071 4
 4 -14 11 345.055 413.246 4
 -4 -14 11 433.835 500.727 1
 4 -14 11 787.217 401.334 6
 -4 -14 11 933.493 514.946 6
 -4 -14 12 2642.93 762.345 1
 -4 -14 12 4490.34 737.053 6
 4 -14 12 4747.95 666.458 6
 4 -14 12 4046.38 785.343 4
 4 -14 13 497.91 493.814 4
 4 14 13 701.375 401.189 2
 -4 -14 13 895.48 502.889 6
 4 -14 13 1041.1 386.902 6
 4 -14 14 1421.83 401.656 6
 -4 -14 14 798.014 442.529 6
 4 -14 14 1625.52 583.085 4
 -4 -14 15 5479.17 747.456 6
 4 -14 15 4247.9 617.617 6
 -4 -14 16 687.605 409.675 6
 4 14 16 1839.56 723.016 4
 4 14 17 4603.06 884.071 4
 -4 -14 17 2213.79 471.574 6
 -4 14 17 3713.27 784.634 4
 4 14 18 -144.429 465.72 4
 -4 14 18 680.766 474.394 4
 -4 -16 0 6110.85 610.37 1
 4 -16 0 6300.62 472.09 1
 -4 -16 -1 427.955 359.726 1
 4 -16 -1 690.411 271.644 1
 4 -16 1 629.664 174.917 1
 -4 -16 1 736.508 347.095 1
 4 -16 2 1395.32 191.569 1
 -4 -16 -2 1812.03 476.513 1
 -4 -16 2 1621.06 394.829 1
 4 -16 3 9942.24 454.463 1
 -4 -16 3 12955.6 864.501 1
 4 -16 4 29444.9 861.521 1
 -4 -16 4 36482.6 1393.86 1
 -4 -16 5 101944 2318.67 1
 -4 -16 6 4073.26 647.794 6
 -4 -16 6 4405.06 615.154 1
 4 -16 6 4789.58 526.307 6
 -4 -16 7 47738.1 1876.18 1
 -4 -16 -7 42485 1425.57 3
 4 -16 7 47368.7 1588.06 6
 -4 -16 7 46925.4 1850.63 6
 -4 -16 8 747.927 393.438 1
 -4 -16 -8 793.701 347.105 3
 4 -16 8 728.049 341.717 6
 -4 -16 8 774.885 460.049 6
 4 -16 9 25196 1529.96 4
 -4 -16 9 25485.4 1460.37 6
 -4 -16 -9 24172.7 1146.88 3
 4 -16 9 27527.3 1344.17 6
 -4 -16 9 27559.2 1715.68 1
 -4 -16 10 1383.63 614.449 1
 4 -16 10 2213.15 521.603 6
 -4 -16 10 1844.51 629.251 6
 4 -16 10 1860.89 626.735 4
 -4 -16 11 10496.2 1224.86 1
 4 -16 11 11390.3 966.095 6
 -4 -16 11 10528.5 982.586 6
 4 -16 11 11219.6 1145.12 4
 -4 -16 12 1121.1 540.118 6
 -4 -16 12 751.344 529.103 1
 4 -16 12 1761.06 485.519 6
 -4 -16 13 13275.6 1126.43 6
 4 -16 13 14362.2 1074.75 6
 -4 -16 14 913.79 464.072 6
 4 -16 14 1662.02 477.419 6
 4 -16 15 11305.8 954.927 6
 -4 -16 15 11494.8 1026.87 6
 -4 -16 16 1492.78 475.327 6
 4 16 17 6091.82 929.996 4
 -4 -16 17 4772.75 610.194 6
 4 16 18 16.7312 489.722 4
 -4 16 18 1526.39 522.352 4
 -4 -18 0 20.7285 290.429 1
 4 -18 0 126.65 187.285 1
 -4 -18 1 285.234 317.029 1
 4 -18 1 316.23 162.033 1
 -4 -18 -1 548.117 374.035 1
 4 -18 -1 286.663 251.855 1
 -4 -18 2 428.852 334.998 1
 -4 -18 -2 468.392 366.187 1
 4 -18 2 631.971 154.515 1
 -4 -18 -3 102135 2614.37 1
 -4 -18 3 92990 2344.02 1
 -4 -18 4 4559.15 621.434 1
 4 -18 5 101102 2169.11 6
 -4 -18 5 103679 2487 1
 -4 -18 5 95473.4 2462.49 6
 -4 -18 -5 99835 2096.91 3
 4 -18 6 2590.05 461.957 6
 -4 -18 6 2805.62 580.795 6
 -4 -18 -6 2858.82 486.53 3
 -4 -18 6 2858.68 552.926 1
 -4 -18 7 33464.8 1662.97 1
 4 -18 7 33909.4 1386.13 6
 -4 -18 7 32917.4 1595.05 6
 -4 -18 -7 33737.4 1304.64 3
 -4 -18 -8 2814.89 484.43 3
 -4 -18 8 1794.05 565.161 1
 -4 -18 8 2832.95 616.779 6
 4 -18 8 2830.42 515.802 6
 -4 -18 -9 5039.16 603.142 3
 -4 -18 9 5215.18 742.991 6
 4 -18 9 5301.01 660.621 6
 -4 -18 9 4935.71 809.829 1
 -4 -18 10 839.539 476.888 1
 -4 -18 10 814.466 491.511 6
 4 -18 10 612.387 404.979 6
 4 -18 11 4407.49 673.118 6
 -4 -18 11 2512.68 765.741 1
 -4 -18 11 3797.71 667.529 6
 -4 -18 12 374.862 492.991 1
 4 -18 12 765.612 413.281 6
 -4 -18 12 -289.441 546.678 6
 -4 -18 13 2793.92 609.339 6
 4 -18 13 4184.11 643.335 6
 -4 -18 14 1347.96 522.711 6
 4 -18 14 991.365 431.513 6
 -4 -18 15 16972.7 1174.13 6
 4 -18 15 16789.8 1122.82 6
 4 -18 16 447.138 309.298 6
 -4 -18 16 346.858 344.236 6
 -4 -18 17 6506.34 689 6
 4 18 17 9903.93 1099.53 4
 4 18 18 -289.855 430.276 4
 4 -20 0 1021.07 270.633 1
 -4 -20 0 843.888 415.132 1
 4 -20 -1 12403.6 803.024 1
 -4 -20 1 13475.2 976.543 1
 -4 -20 -1 13397 970.8 1
 4 -20 -2 630.831 317.846 1
 -4 -20 -2 1062.36 422.329 1
 -4 -20 2 903.299 396.774 1
 -4 -20 3 14071.7 999.421 1
 4 -20 -3 14099.7 728.605 3
 4 -20 3 13067.4 843.343 6
 -4 -20 -3 13424.7 795.895 3
 -4 -20 -3 14415.6 1080.89 1
 -4 -20 4 1272.79 424.538 1
 4 -20 -4 1217.58 308.511 3
 4 -20 4 1483.91 355.021 6
 -4 -20 -4 905.685 341.447 3
 -4 -20 -4 1282.15 508.377 1
 4 -20 4 1038.5 358.792 5
 -4 -20 4 903.539 372.659 6
 -4 -20 -5 2882.58 475.941 3
 4 -20 5 2792.39 474.492 5
 4 -20 5 2798.36 449.206 6
 -4 -20 5 2573.34 510.787 1
 -4 -20 5 2310.62 497.975 6
 -4 -20 -6 954.98 398.876 3
 4 -20 6 786.467 366.493 5
 -4 -20 6 779.603 391.125 1
 4 -20 6 872.475 341.28 6
 -4 -20 6 1082.82 430.408 6
 -4 -20 7 5752.31 741.073 6
 -4 -20 -7 6342.8 636.34 3
 -4 -20 7 5113.53 764.45 1
 4 -20 7 5389.54 626.25 6
 -4 -20 8 313.095 357.069 1
 -4 -20 -8 741.01 341.949 3
 4 -20 8 680.334 357.14 6
 -4 -20 8 444.579 449.838 6
 -4 -20 -9 6832.03 714.87 3
 -4 -20 9 6809.47 815.375 6
 -4 -20 9 5630.81 936.56 1
 4 -20 9 6402.78 751.053 6
 -4 -20 -10 -33.2439 392.229 3
 -4 -20 10 -40.802 451.771 1
 4 -20 10 52.0924 387.238 6
 -4 -20 10 -111.294 519.484 6
 4 -20 11 1031.63 452.484 6
 -4 -20 11 346.082 496.537 6
 -4 -20 11 708.633 477.072 1
 4 -20 12 1941.76 517.265 6
 -4 -20 12 802.409 468.976 6
 4 -20 13 1938.27 501.973 6
 -4 -20 13 1995.47 574.874 6
 4 -20 14 308.561 358.854 6
 -4 -20 14 651.095 440.363 6
 -4 -20 15 5281.38 704.271 6
 4 -20 15 5371.04 644.918 6
 -4 -20 16 -214.838 353.815 6
 4 -20 16 -16.5363 234.611 6
 -4 -20 17 979.061 336.379 6
 4 20 17 2310.58 596.468 4
 -4 -22 0 959.806 417.129 1
 -4 -22 0 765.25 328.384 3
 -4 -22 1 40208.6 1703.85 1
 4 -22 -1 37872.3 1235.73 3
 -4 -22 -1 36426.5 1313.68 3
 4 -22 1 37440.8 1266.47 5
 4 -22 -1 36563.1 1328.1 1
 -4 -22 -1 37836.8 1602.42 1
 -4 -22 -2 354.216 362.994 1
 4 -22 2 255.765 250.668 6
 -4 -22 2 279.968 339.379 1
 4 -22 2 422.299 317.278 5
 4 -22 -2 303.803 240.314 3
 4 -22 -2 400.813 281.81 1
 -4 -22 -2 430.081 313.391 3
 4 -22 -3 631.165 257.245 3
 -4 -22 3 1004.38 409.527 1
 -4 -22 -3 775.419 345.337 3
 -4 -22 -3 584.955 414.731 1
 4 -22 3 749.329 289.783 6
 4 -22 -3 813.428 338.076 1
 4 -22 3 1131.89 350.202 5
 -4 -22 3 696.176 300.125 6
 4 -22 4 470.773 262.332 6
 4 -22 4 515.44 349.824 5
 4 -22 -4 434.304 250.86 3
 -4 -22 4 516.616 312.036 6
 -4 -22 4 483.573 338.374 1
 -4 -22 -4 764.895 349.229 3
 -4 -22 -4 351.254 404.638 1
 -4 -22 5 1822.52 474.375 1
 -4 -22 5 1200.46 397.661 6
 -4 -22 -5 1110.18 508.979 1
 -4 -22 -5 1119.63 388.415 3
 4 -22 5 1245.96 389.213 5
 4 -22 5 1310.83 378.997 6
 4 -22 6 620.04 343.797 6
 -4 -22 6 806.728 389.905 1
 4 -22 6 449.693 378.512 5
 -4 -22 -6 661.589 374.51 3
 -4 -22 6 315.796 377.14 6
 4 -22 7 1444.66 426.991 6
 -4 -22 7 1210.43 494.433 1
 -4 -22 -7 1801.72 427.55 3
 -4 -22 7 1532.68 455.303 6
 -4 -22 -8 865.022 382.034 3
 4 -22 8 1000.97 387.133 6
 -4 -22 8 957.142 442.799 1
 -4 -22 8 821.141 482.161 6
 -4 -22 -9 8220.02 771.231 3
 4 -22 9 8875.67 858.815 6
 -4 -22 9 7807.1 902.532 6
 -4 -22 9 6732 1010.24 1
 -4 -22 10 -254.596 548.048 6
 4 -22 10 430.623 395.423 6
 -4 -22 10 106.808 395.778 1
 -4 -22 -10 123.161 383.116 3
 4 -22 11 13166.4 1082.13 6
 -4 -22 11 12283.9 1097.88 6
 4 -22 12 565.843 388.565 6
 -4 -22 12 1266.35 562.21 6
 4 -22 13 7505.89 827.284 6
 -4 -22 13 7852.15 885.885 6
 -4 -22 14 535.162 420.897 6
 4 -22 14 94.4003 343.54 6
 4 -22 15 2379.69 500.165 6
 -4 -22 15 2038.9 514.898 6
 -4 -22 16 -121.331 328.015 6
 4 -22 16 127.859 256.986 6
 -4 -22 17 161.63 255.825 6
 4 22 17 749.913 465.411 4
 -4 -24 0 3471.03 531.504 3
 -4 -24 0 3685.38 637.909 1
 4 -24 1 46280.1 1450.9 5
 4 -24 -1 49897.1 1448.16 3
 -4 -24 -1 47421.3 1892.96 1
 -4 -24 -1 48388.7 1565.99 3
 4 -24 1 46595.6 1643.62 6
 -4 -24 1 44178.6 1496.4 3
 -4 -24 1 48546.6 1966 1
 -4 -24 2 4242.46 646.994 1
 4 -24 -2 3478.3 469.952 3
 -4 -24 2 2928.52 493.089 3
 4 -24 2 3470.03 496.71 6
 -4 -24 -2 4023.61 555.84 3
 -4 -24 -2 3416.19 606.313 1
 4 -24 2 3853.59 523.806 5
 -4 -24 -3 27003.5 1187.5 3
 4 -24 3 26840.4 1244.66 6
 4 -24 3 27935.6 1201.44 5
 -4 -24 3 28667.4 1540.01 1
 4 -24 -3 27713.5 1086.44 3
 4 -24 -3 25389.6 1378.68 1
 -4 -24 -3 25840.2 1592.41 1
 -4 -24 3 21677.2 1087.9 6
 -4 -24 3 21145.2 1007.43 3
 -4 -24 4 508.816 370.148 1
 4 -24 4 330.819 358.518 5
 -4 -24 -4 381.62 441.604 1
 4 -24 4 -218.71 371.124 6
 -4 -24 4 398.912 336.713 6
 -4 -24 -4 294.633 312.78 3
 4 -24 -4 424.37 340.474 1
 4 -24 5 5871.46 659.966 5
 -4 -24 -5 5946.94 629.215 3
 -4 -24 -5 5955.91 906.015 1
 -4 -24 5 6473.64 724.47 6
 -4 -24 5 6744.1 797.781 1
 4 -24 5 5181.77 629.464 6
 4 -24 6 2082.03 504.518 5
 -4 -24 6 1813.48 519.829 6
 -4 -24 -6 1689.94 423.688 3
 4 -24 6 1866.3 471.253 6
 -4 -24 -6 1814.19 644.038 1
 -4 -24 6 1818.11 530.388 1
 -4 -24 -7 33075.5 1361.92 3
 4 -24 7 35238.2 1573.23 6
 -4 -24 -7 30220.1 2061.96 1
 -4 -24 7 33734.3 1887.88 1
 -4 -24 7 34186.9 1636.39 6
 -4 -24 8 4276.7 744.672 6
 -4 -24 -8 3481.32 558.554 3
 -4 -24 8 3191.26 725.023 1
 4 -24 8 3959.04 642.798 6
 4 -24 9 25756.2 1468.04 6
 -4 -24 -9 23699 1246.48 3
 -4 -24 9 27348.7 1561.27 6
 -4 -24 -10 2351.26 505.033 3
 4 -24 10 2672.18 622.796 6
 -4 -24 10 2825.84 690.046 6
 4 -24 11 1560.13 524.694 6
 -4 -24 11 1903.27 571.259 6
 -4 -24 12 1292.98 536.933 6
 4 -24 12 843.69 435.36 6
 4 -24 13 9121.35 907.371 6
 -4 -24 13 9743.83 935.112 6
 4 -24 14 526.433 366.213 6
 -4 -24 14 447.343 385.868 6
 -4 -24 15 4177.34 606.54 6
 4 -24 15 4094.04 579.242 6
 4 -24 16 340.522 248.261 6
 -4 -24 16 564.573 323.936 6
 4 24 17 2310.3 542.641 4
 -4 -26 0 15570.5 1209.63 1
 4 -26 0 15147.8 903.576 5
 -4 -26 0 15348.7 953.849 3
 4 -26 1 38914.4 1394.23 5
 -4 -26 1 40352.7 1864.55 1
 -4 -26 1 41427 1477.32 3
 -4 -26 -1 40494.1 1485.13 3
 -4 -26 -1 39192.1 1859.58 1
 -4 -26 -2 7890.23 730.609 3
 4 -26 2 8170.2 741.761 6
 -4 -26 -2 8144.98 890.078 1
 -4 -26 2 7953.63 712.606 3
 -4 -26 2 8843.4 931.018 1
 4 -26 2 8168.77 717.854 5
 4 -26 3 39341.4 1487.56 5
 -4 -26 -3 41659.2 2029.31 1
 -4 -26 3 40821.3 1906.3 1
 -4 -26 3 33613.1 1402.45 6
 4 -26 3 39710.6 1534.64 6
 -4 -26 3 32310.2 1247.66 3
 -4 -26 -3 38874.3 1454.57 3
 -4 -26 4 4650.83 713.37 1
 -4 -26 4 4384.04 588.304 6
 -4 -26 -4 4524 578.785 3
 -4 -26 -4 4044.86 785.053 1
 4 -26 4 3966.64 566.222 6
 4 -26 4 3941.01 593.113 5
 4 -26 5 2384.76 521.281 5
 -4 -26 5 2629.97 572.879 1
 4 -26 5 2025.95 475.651 6
 -4 -26 5 2468.01 525.918 6
 -4 -26 -5 1941.12 630.059 1
 -4 -26 -5 2182.51 464.021 3
 4 -26 -5 2215.62 548.328 1
 4 -26 6 2078.2 509.604 5
 -4 -26 6 1913.39 518.916 6
 -4 -26 -6 2290.95 500.511 3
 -4 -26 6 2158.38 582.097 1
 4 -26 6 1728.88 464.258 6
 -4 -26 -6 1494.84 629.591 1
 -4 -26 7 5773.62 871.581 1
 -4 -26 7 6899.98 817.154 6
 -4 -26 -7 5353.36 1036.4 1
 4 -26 7 7266.85 810.452 6
 -4 -26 -7 6939.17 709.491 3
 -4 -26 -8 8111.35 772.226 3
 4 -26 8 9118.38 923.775 6
 -4 -26 8 9644.43 987.1 6
 -4 -26 -8 7558.82 1231.95 1
 -4 -26 -9 10401.8 850.015 3
 4 -26 9 12169.4 1068.12 6
 -4 -26 9 13096.4 1133.17 6
 -4 -26 10 2334.37 654.259 6
 4 -26 10 2340.24 605.984 6
 -4 -26 -10 1631.73 445.047 3
 -4 -26 11 31184.2 1644.36 6
 4 -26 11 33222.8 1722.36 6
 -4 -26 12 667.822 462.189 6
 4 -26 12 155.022 382.166 6
 -4 -26 13 12601.7 1031.56 6
 4 -26 13 11975.5 982.453 6
 -4 -26 14 2137.7 507.699 6
 4 -26 14 1475.36 434.043 6
 -4 -26 15 8502.48 794.09 6
 4 -26 15 7499.88 710.624 6
 -4 -26 16 534.354 287.169 6
 -4 -28 0 4016.88 693.465 1
 -4 -28 0 3423.95 554.276 3
 4 -28 0 3285.44 524.531 5
 -4 -28 1 20023.6 1063.24 3
 -4 -28 -1 20566.8 1416.6 1
 -4 -28 -1 21201.8 1116.16 3
 4 -28 1 20723.9 1089.04 5
 -4 -28 1 20577.4 1401.92 1
 4 -28 2 6126.57 681.718 6
 4 -28 2 7484.76 723.049 5
 -4 -28 2 7951.1 960.444 1
 -4 -28 -2 6436.57 879.795 1
 -4 -28 -2 7276.96 727.879 3
 -4 -28 2 6514.43 653.091 3
 -4 -28 3 10659.6 829.335 5
 -4 -28 3 10563.4 1048.96 1
 -4 -28 3 9339.87 764.449 6
 4 -28 3 11055.3 876.307 5
 4 -28 3 10293.7 927.366 6
 -4 -28 3 8894.24 696.877 3
 -4 -28 -3 10111.1 1073.42 1
 -4 -28 -3 11593.4 858.824 3
 -4 -28 4 330.939 331.755 6
 4 -28 4 89.9221 383.18 5
 -4 -28 -4 233.052 347.712 3
 -4 -28 4 261.413 301.322 1
 4 -28 4 280.24 301.173 6
 -4 -28 -4 483.46 476.502 1
 -4 -28 -5 846.52 491.764 1
 4 -28 5 1642.67 499.56 5
 4 -28 5 1623.69 453.689 6
 -4 -28 5 1606.54 521.02 1
 -4 -28 -5 1760.84 459.39 3
 -4 -28 5 1593.63 458.383 6
 -4 -28 -6 673.454 387.786 3
 4 -28 6 934.121 500.38 5
 -4 -28 6 621.692 422.119 1
 -4 -28 -6 411.549 508.002 1
 4 -28 6 693.003 432.392 6
 -4 -28 6 1073.06 457.101 6
 -4 -28 7 1792.25 511.058 6
 -4 -28 -7 1248.13 421.414 3
 4 -28 7 1258.62 463.748 6
 -4 -28 -7 799.059 624.452 1
 -4 -28 -8 119.727 390.943 3
 -4 -28 8 1006.03 519.872 6
 4 -28 8 461.775 474.238 6
 -4 -28 -8 323.16 545.713 1
 -4 -28 -9 1418.33 418.682 3
 4 -28 9 2020.14 597.071 6
 -4 -28 9 2573.85 628.576 6
 -4 -28 10 5558.79 783.886 6
 -4 -28 -10 4326.16 598.92 3
 4 -28 10 5442.06 776.596 6
 4 -28 11 10326 986.105 6
 -4 -28 11 9891.72 980.624 6
 -4 -28 12 2745.87 597.616 6
 4 -28 12 2275.96 558.709 6
 -4 -28 13 1891.55 487.112 6
 4 -28 13 1552.9 476.039 6
 -4 -28 14 995.695 396.599 6
 4 -28 14 585.332 326.182 6
 -4 -28 15 896.562 331.493 6
 4 -28 15 543.663 296.335 6
 4 -30 0 178.608 375.662 5
 -4 -30 0 -17.5455 340.166 1
 -4 -30 0 -58.3966 341.318 3
 4 -30 -1 69.4391 334.756 5
 -4 -30 -1 97.2395 331.738 1
 -4 -30 1 174.011 317.925 1
 -4 -30 -1 314.931 353.493 3
 4 -30 1 229.184 382.143 5
 -4 -30 1 341.727 325.782 3
 -4 -30 2 554.539 350.051 3
 4 -30 2 716.305 431.658 5
 -4 -30 2 377.376 394.849 1
 -4 -30 -2 580.065 443.262 1
 -4 -30 -2 476.978 418.115 3
 -4 -30 3 2446.24 546.003 1
 4 -30 3 2425.64 534.464 5
 -4 -30 3 2697.31 524.931 5
 -4 -30 -3 2773.07 539.165 3
 -4 -30 3 2068.09 412.041 3
 -4 -30 -3 2327.43 617.854 1
 4 -30 3 2417.31 490.138 6
 4 -30 4 176.691 412.621 5
 -4 -30 -4 705.047 453.766 1
 -4 -30 4 351.881 331.674 1
 -4 -30 4 450.262 318.039 6
 -4 -30 -4 422.522 346.484 3
 4 -30 4 439.854 333.067 6
 -4 -30 -5 236.611 428.276 1
 4 -30 5 165.855 379.401 5
 -4 -30 -5 808.452 418.794 3
 4 -30 5 442.848 492.403 6
 -4 -30 5 522.018 379.397 6
 -4 -30 -6 498.056 476.198 1
 -4 -30 6 891.308 417.3 6
 -4 -30 -6 569.032 379.617 3
 4 -30 6 549.619 410.182 6
 4 -30 6 1026.49 475.704 5
 -4 -30 -7 14722.5 1617.3 1
 4 -30 7 16964 1198.98 6
 -4 -30 -7 16068.2 1027.84 3
 -4 -30 7 17449.4 1212.62 6
 4 -30 8 6900.23 843.264 6
 -4 -30 8 7307.59 869.017 6
 -4 -30 -8 6266.42 691.318 3
 -4 -30 9 346.955 419.978 6
 -4 -30 -9 -91.7176 360.159 3
 4 -30 9 283.806 373.33 6
 4 -30 10 732.182 468.567 6
 -4 -30 10 688.088 460.373 6
 4 -30 11 1986.84 550.58 6
 -4 -30 11 1976.31 540.718 6
 -4 -30 12 106.356 368.883 6
 4 -30 12 91.4789 334.254 6
 -4 -30 13 715.101 394.33 6
 4 -30 13 -345.865 396.327 6
 4 -30 14 1823.22 408.743 6
 -4 -30 14 2355.28 465.244 6
 -4 -30 15 2042.91 401.489 6
 4 -32 0 9972.85 854.137 5
 -4 -32 0 8855.2 1032.62 1
 -4 -32 0 10331.2 823.249 3
 -4 -32 -1 3937.3 591.406 3
 4 -32 -1 4433.43 613.623 5
 4 -32 1 4613.01 638.86 5
 -4 -32 -1 3516.56 727.533 1
 -4 -32 1 4488.05 748.282 1
 -4 -32 1 3867.28 551.575 3
 -4 -32 -2 16112.5 1413.47 1
 4 -32 -2 19221.3 1124.92 5
 4 -32 2 17010.8 1080.68 5
 -4 -32 2 17901.1 1083.64 5
 -4 -32 -2 18855.9 1096.16 3
 -4 -32 2 16766.9 970.26 3
 -4 -32 3 1500.13 444.745 5
 -4 -32 -3 731.246 428.292 1
 4 -32 3 581.357 427.521 5
 -4 -32 -3 1086.04 439.919 3
 4 -32 4 -214.99 470.591 5
 -4 -32 -4 243.287 432.252 1
 -4 -32 -4 20.9603 380.158 3
 4 -32 4 -171.055 390.866 6
 -4 -32 4 -20.9044 333.104 6
 4 -32 5 3832.61 649.004 5
 4 -32 5 4283.17 662.959 6
 -4 -32 -5 4315.01 617.553 3
 -4 -32 -5 3829.72 790.501 1
 -4 -32 5 3829.68 610.037 6
 4 -32 6 19545 1297.53 6
 -4 -32 -6 21378.6 1181.58 3
 -4 -32 6 20866.3 1281.52 6
 4 -32 7 20761.8 1336.29 6
 -4 -32 -7 19168.8 1132.26 3
 -4 -32 7 20584.9 1296.94 6
 -4 -32 -8 5299.49 649.719 3
 4 -32 8 6879.7 819.651 6
 -4 -32 8 5473.59 742.624 6
 -4 -32 -9 3628.02 560.53 3
 4 -32 9 3625.14 668.872 6
 -4 -32 9 3631.08 638.58 6
 4 -32 10 3226.38 616.788 6
 -4 -32 10 2970.98 586.801 6
 4 -32 11 570.237 377.906 6
 -4 -32 11 620.472 403.281 6
 -4 -32 12 2016.57 485.088 6
 4 -32 12 1714.29 460.285 6
 4 -32 13 1543.25 396.803 6
 -4 -32 13 2032.35 457.992 6
 -4 -32 14 3264.25 486.804 6
 4 -34 0 26397.2 1324.99 5
 -4 -34 0 26262.4 1264.79 3
 -4 -34 1 13983 941.772 3
 -4 -34 -1 13489 980.794 3
 4 -34 -1 14112.7 992.518 5
 4 -34 1 14022.1 992.704 5
 -4 -34 1 14181.7 971.861 5
 -4 -34 2 4016.21 600.879 5
 -4 -34 -2 3041.66 554.397 3
 -4 -34 -2 2360.12 664.215 1
 4 -34 -2 4054.67 639.888 5
 -4 -34 2 3263.06 494.278 3
 4 -34 2 3518.89 564.069 5
 4 -34 3 212.181 446.238 5
 4 -34 -3 693.518 428.902 5
 -4 -34 -3 399.329 385.391 1
 -4 -34 -3 445.895 367.517 3
 -4 -34 3 830.896 403.429 5
 4 -34 4 4494.95 659.756 5
 4 -34 -4 5728.01 722.808 5
 -4 -34 -4 4391.57 602.386 3
 4 -34 5 12416.9 1051.95 6
 -4 -34 5 11275.3 944.752 6
 -4 -34 -5 12048 911.227 3
 4 -34 5 11950.2 978.858 5
 4 -34 6 24995.4 1445.96 6
 -4 -34 6 24830 1383.36 6
 -4 -34 -6 24994.2 1262.22 3
 -4 -34 7 2370.65 523.107 6
 -4 -34 -7 2228.85 460.495 3
 4 -34 7 1984.88 496.958 6
 -4 -34 8 13114.1 1059.62 6
 -4 -34 -8 12405 914.943 3
 4 -34 8 12222.3 1059.5 6
 -4 -34 9 2797.97 577.804 6
 4 -34 9 2637.89 584.886 6
 4 -34 -10 5974.87 628.501 5
 -4 -34 10 5796.84 742.677 6
 4 -34 10 5853.44 739.148 6
 4 -34 11 2180.64 500.527 6
 4 -34 -11 2059.14 385.366 5
 -4 -34 11 2557.35 526.251 6
 -4 -34 12 4263.87 604.879 6
 4 -34 12 3922.09 566.651 6
 -4 -34 13 1983.84 417.706 6
 4 -36 0 28102.1 1355.3 5
 -4 -36 0 27407.1 1299.12 3
 -4 -36 1 613.857 363.729 5
 4 -36 -1 779.625 458.097 5
 4 -36 1 283.802 390.523 5
 -4 -36 -1 181.594 359.739 3
 -4 -36 1 241.474 299.254 3
 -4 -36 2 513.745 280.153 3
 4 -36 -2 834.118 452.058 5
 4 -36 2 119.636 421.515 5
 -4 -36 -2 278.967 357.728 3
 -4 -36 2 580.236 372.741 5
 4 -36 -3 1528.88 492.661 5
 -4 -36 3 1451.83 413.763 5
 -4 -36 -3 1002.9 402.664 3
 4 -36 3 711.595 358.293 5
 4 -36 4 13563.5 999.943 5
 -4 -36 -4 14346.1 992.808 3
 4 -36 -4 15914.1 1062.03 5
 -4 -36 -5 2873.8 523.744 3
 -4 -36 5 2535.95 477.208 6
 4 -36 -5 3667.19 628.652 5
 4 -36 5 3103.94 561.652 5
 -4 -36 -6 641.075 364.065 3
 4 -36 -6 877.731 425.179 5
 -4 -36 6 820.536 361.896 6
 4 -36 -7 1486.23 450.39 5
 -4 -36 -7 913.807 340.957 3
 -4 -36 7 1197.26 415.49 6
 -4 -36 8 4055.15 614.819 6
 4 -36 -8 3683.65 562.712 5
 4 -36 -9 999.168 388.725 5
 -4 -36 9 869.407 407.277 6
 4 -36 -10 3446.45 491.794 5
 -4 -36 10 3717.88 578.828 6
 -4 -36 11 445.446 315.266 6
 -4 -36 12 2177.3 407.09 6
 -4 -36 13 208.271 227.265 6
 -4 -38 0 16711.4 1040.71 5
 4 -38 0 17520.8 1103.87 5
 -4 -38 0 16916.6 1021.51 3
 4 -38 -1 436.587 366.53 5
 -4 -38 1 705.906 385.652 5
 4 -38 1 -88.088 420.686 5
 -4 -38 -1 223.811 338.396 3
 -4 -38 1 365.485 295.665 3
 -4 -38 2 -80.5494 278.133 3
 -4 -38 2 -80.1599 300.91 5
 4 -38 2 -186.535 416.981 5
 4 -38 -2 57.7948 374.945 5
 -4 -38 -2 -31.1042 357.471 3
 4 -38 3 270.455 343.199 5
 -4 -38 3 329.825 326.949 5
 -4 -38 -3 461.966 360.71 3
 4 -38 -3 438.207 386.015 5
 4 -38 -4 617.54 429.517 5
 -4 -38 -4 135.796 336.194 3
 4 -38 4 169.471 339.828 5
 -4 -38 -5 -399.166 409.449 3
 4 -38 -5 367.865 418.357 5
 4 -38 -6 854.524 448.721 5
 -4 -38 6 309.751 282.476 6
 -4 -38 -6 36.867 341.053 3
 4 -38 -7 184.045 347.299 5
 -4 -38 7 182.824 268.356 6
 4 -38 -8 523.095 344.473 5
 -4 -38 8 216.138 274.186 6
 -4 -38 9 171.608 276.588 6
 4 -38 -9 446.641 311.412 5
 -4 -38 10 898.02 338.925 6
 4 -38 -10 458.204 279.702 5
 -4 -38 11 73.763 232.274 6
 4 -40 0 32490.5 1472.31 5
 -4 -40 0 32296.2 1407.14 5
 -4 -40 0 32504.1 1347.93 3
 -4 -40 -1 1040.33 373.431 3
 -4 -40 -1 1441.22 437.58 5
 4 -40 1 724.19 395.946 5
 -4 -40 1 1353.78 415.919 5
 4 -40 -1 1636.92 498.973 5
 -4 -40 2 2869.37 490.855 5
 -4 -40 -2 3456.33 576.436 5
 -4 -40 -2 2644.8 484.832 3
 4 -40 2 2277.27 481.05 5
 4 -40 -2 3170.82 554.366 5
 4 -40 -3 152.026 366.925 5
 -4 -40 -3 137.385 330.536 3
 4 -40 3 129.03 330.362 5
 4 -40 4 2497.69 496.654 5
 4 -40 -4 3099.55 563.778 5
 -4 -40 -4 3221.32 529.632 3
 4 -40 -5 73.5463 346.51 5
 4 -40 -6 5739.13 667.464 5
 4 -40 -7 291.31 330.794 5
 4 -40 -8 8071.79 697.741 5
 -4 -40 8 5598.77 597.498 6
 -4 -40 9 -10.7338 254.228 6
 4 -40 -9 534.511 299.387 5
 4 -40 -10 2527.86 372.285 5
 -4 -40 10 2483.45 394.557 6
 -4 -42 0 19829.8 1084.68 5
 4 -42 0 19673.4 1133.2 5
 -4 -42 1 427.5 335.549 5
 4 -42 1 477.95 364.624 5
 -4 -42 -1 956.406 413.923 5
 4 -42 -1 251.884 365.665 5
 -4 -42 2 16065.3 972.219 5
 -4 -42 -2 19001.3 1068.82 5
 4 -42 2 16649.7 1022.78 5
 4 -42 -2 19825 1132.23 5
 4 -42 -3 -205.084 376.53 5
 -4 -42 -3 410.876 385.677 5
 4 -42 3 193.157 292.734 5
 -4 -42 -4 4537.46 599.258 5
 4 -42 -4 4125.31 590.065 5
 -4 -42 -5 226.995 330.626 5
 4 -42 -5 231.327 333.814 5
 4 -42 -6 6279.37 662.059 5
 4 -42 -7 579.998 333.189 5
 4 -42 -8 9089.54 676.746 5
 -4 -42 -9 539.263 290.683 5
 -4 -44 0 6821.73 632.424 5
 4 -44 0 6300.63 649.559 5
[truncated: 485,462 more chars]
