# Supplementary material
Source: publisher figshare collection journal article supplement (https://acs.figshare.com/ndownloader/files/16775912)
Supplement: Supplementary file 1 [file 16775912 › LIFM-114-Water-solved.cif]

data_LIFM-114-Water
_audit_creation_date              2017-12-05
_audit_creation_method
;
Olex2 1.2
(compiled 2017.08.10 svn.r3458 for OlexSys, GUI svn.r5381)
;
_shelx_SHELXL_version_number      '2014/7'
_publ_contact_author_address      ?
_publ_contact_author_email        ?
_publ_contact_author_id_orcid     ?
_publ_contact_author_name         ''
_publ_contact_author_phone        ?
_publ_section_references
;
Dolomanov, O.V., Bourhis, L.J., Gildea, R.J, Howard, J.A.K. & Puschmann, H.
 (2009), J. Appl. Cryst. 42, 339-341.

Sheldrick, G.M. (2015). Acta Cryst. C71, 3-8.
;
_chemical_name_common             LIFM-114-Water
_chemical_name_systematic         ?
_chemical_formula_moiety         'C108 H64 O32 Zr6 [+ solvent]'
_chemical_formula_sum             'C108 H64 O32 Zr6'
_chemical_formula_weight          2420.91
_chemical_melting_point           ?
loop_
  _atom_type_symbol
  _atom_type_description
  _atom_type_scat_dispersion_real
  _atom_type_scat_dispersion_imag
  _atom_type_scat_source
 'C' 'C' 0.0181 0.0091 'International Tables Vol C Tables 4.2.6.8 and 6.1.1.4'
 'H' 'H' 0.0000 0.0000 'International Tables Vol C Tables 4.2.6.8 and 6.1.1.4'
 'O' 'O' 0.0492 0.0322 'International Tables Vol C Tables 4.2.6.8 and 6.1.1.4'
 'Zr' 'Zr' -0.1862 2.2449
 'International Tables Vol C Tables 4.2.6.8 and 6.1.1.4'

_shelx_space_group_comment
;
The symmetry employed for this shelxl refinement is uniquely defined
by the following loop, which should always be used as a source of
symmetry information in preference to the above space-group names.
They are only intended as comments.
;
_space_group_crystal_system       'orthorhombic'
_space_group_IT_number            69
_space_group_name_H-M_alt         'F m m m'
_space_group_name_Hall            '-F 2 2'
loop_
  _space_group_symop_operation_xyz
 'x, y, z'
 '-x, -y, z'
 'x, -y, -z'
 '-x, y, -z'
 'x, y+1/2, z+1/2'
 '-x, -y+1/2, z+1/2'
 'x, -y+1/2, -z+1/2'
 '-x, y+1/2, -z+1/2'
 'x+1/2, y, z+1/2'
 '-x+1/2, -y, z+1/2'
 'x+1/2, -y, -z+1/2'
 '-x+1/2, y, -z+1/2'
 'x+1/2, y+1/2, z'
 '-x+1/2, -y+1/2, z'
 'x+1/2, -y+1/2, -z'
 '-x+1/2, y+1/2, -z'
 '-x, -y, -z'
 'x, y, -z'
 '-x, y, z'
 'x, -y, z'
 '-x, -y+1/2, -z+1/2'
 'x, y+1/2, -z+1/2'
 '-x, y+1/2, z+1/2'
 'x, -y+1/2, z+1/2'
 '-x+1/2, -y, -z+1/2'
 'x+1/2, y, -z+1/2'
 '-x+1/2, y, z+1/2'
 'x+1/2, -y, z+1/2'
 '-x+1/2, -y+1/2, -z'
 'x+1/2, y+1/2, -z'
 '-x+1/2, y+1/2, z'
 'x+1/2, -y+1/2, z'

_cell_length_a                    16.1063(7)
_cell_length_b                    28.5501(8)
_cell_length_c                    40.9518(9)
_cell_angle_alpha                 90
_cell_angle_beta                  90
_cell_angle_gamma                 90
_cell_volume                      18831.1(11)
_cell_formula_units_Z             4
_cell_measurement_reflns_used     7903
_cell_measurement_temperature     150(2)
_cell_measurement_theta_max       65.0110
_cell_measurement_theta_min       5.3060
_shelx_estimated_absorpt_T_max    0.753
_shelx_estimated_absorpt_T_min    0.466
_exptl_absorpt_coefficient_mu     3.001
_exptl_absorpt_correction_T_max   1.00000
_exptl_absorpt_correction_T_min   0.27398
_exptl_absorpt_correction_type    multi-scan
_exptl_absorpt_process_details
;
CrysAlisPro 1.171.38.43 (Rigaku Oxford Diffraction, 2015)
Empirical absorption correction using spherical harmonics,
 implemented in SCALE3 ABSPACK scaling algorithm.
;
_exptl_absorpt_special_details    ?
_exptl_crystal_colour             colourless
_exptl_crystal_colour_lustre      ?
_exptl_crystal_colour_primary     colourless
_exptl_crystal_density_diffrn     0.854
_exptl_crystal_density_meas       ?
_exptl_crystal_density_method     ?
_exptl_crystal_description        Rod
_exptl_crystal_F_000              4832
_exptl_crystal_size_max           0.3
_exptl_crystal_size_mid           0.1
_exptl_crystal_size_min           0.1
_exptl_transmission_factor_max    ?
_exptl_transmission_factor_min    ?
_diffrn_reflns_av_R_equivalents   0.0308
_diffrn_reflns_av_unetI/netI      0.0320
_diffrn_reflns_Laue_measured_fraction_full 0.977
_diffrn_reflns_Laue_measured_fraction_max 0.977
_diffrn_reflns_limit_h_max        18
_diffrn_reflns_limit_h_min        -18
_diffrn_reflns_limit_k_max        23
_diffrn_reflns_limit_k_min        -33
_diffrn_reflns_limit_l_max        43
_diffrn_reflns_limit_l_min        -47
_diffrn_reflns_number             10624
_diffrn_reflns_point_group_measured_fraction_full 0.977
_diffrn_reflns_point_group_measured_fraction_max 0.977
_diffrn_reflns_theta_full         65.225
_diffrn_reflns_theta_max          65.225
_diffrn_reflns_theta_min          3.330
_diffrn_ambient_environment       N~2~
_diffrn_ambient_temperature       150(2)
_diffrn_detector                  'CCD plate'
_diffrn_detector_area_resol_mean  10.6525
_diffrn_detector_type             Atlas
_diffrn_measured_fraction_theta_full 0.977
_diffrn_measured_fraction_theta_max 0.977
_diffrn_measurement_details
;
List of Runs (angles in degrees, time in seconds):

  # Type    Start    End  Width  t~exp~   \w     \q     \k     \f   Frames
--------------------------------------------------------------------------
  1  \w    -74.00  31.00   1.00   80.00    --  -41.14  77.00 -60.00  105
  2  \w    -57.00 -21.00   1.00   80.00    --  -41.14 -38.00 120.00   36
  3  \w    109.00 154.00   1.00   90.00    --   89.96 125.00-150.00   45
  4  \w    128.00 162.00   1.00   90.00    --   89.96 125.00 -90.00   34
  5  \w      9.00  96.00   1.00   90.00    --   89.96 -95.00  30.00   87
  6  \w     67.00 131.00   1.00   90.00    --   89.96  61.00  60.00   64
;
_diffrn_measurement_device        'four-circle diffractometer'
_diffrn_measurement_device_type   'SuperNova, Dual, Cu at zero, Atlas'
_diffrn_measurement_method        '\w scans'
_diffrn_orient_matrix_type
'CrysAlisPro convention (1999,Acta A55,543-557)'
_diffrn_orient_matrix_UB_11       0.0328200000
_diffrn_orient_matrix_UB_12       0.0232260000
_diffrn_orient_matrix_UB_13       0.0221731000
_diffrn_orient_matrix_UB_21       -0.0056620000
_diffrn_orient_matrix_UB_22       -0.0116333000
_diffrn_orient_matrix_UB_23       0.0923518000
_diffrn_orient_matrix_UB_31       0.0175041000
_diffrn_orient_matrix_UB_32       -0.0472668000
_diffrn_orient_matrix_UB_33       -0.0117398000
_diffrn_radiation_monochromator   mirror
_diffrn_radiation_probe           x-ray
_diffrn_radiation_type            CuK\a
_diffrn_radiation_wavelength      1.54184
_diffrn_source                    'micro-focus sealed X-ray tube'
_diffrn_source_type               'SuperNova (Cu) X-ray Source'
_reflns_Friedel_coverage          0.000
_reflns_Friedel_fraction_full     .
_reflns_Friedel_fraction_max      .
_reflns_number_gt                 3845
_reflns_number_total              4244
_reflns_odcompleteness_completeness 99.80
_reflns_odcompleteness_iscentric  1
_reflns_odcompleteness_theta      61.08
_reflns_special_details
;
 Reflections were merged by SHELXL according to the crystal
 class for the calculation of statistics and refinement.
 
 Structure factors included contributions from the .fab file.
 
 _reflns_Friedel_fraction is defined as the number of unique
 Friedel pairs measured divided by the number that would be
 possible theoretically, ignoring centric projections and
 systematic absences.
;
_reflns_threshold_expression      'I > 2\s(I)'
_computing_cell_refinement        'CrysAlisPro 1.171.38.43 (Rigaku OD, 2015)'
_computing_data_collection        'CrysAlisPro 1.171.38.43 (Rigaku OD, 2015)'
_computing_data_reduction         'CrysAlisPro 1.171.38.43 (Rigaku OD, 2015)'
_computing_molecular_graphics     'Olex2 (Dolomanov et al., 2009)'
_computing_publication_material   'Olex2 (Dolomanov et al., 2009)'
_computing_structure_refinement   'ShelXL (Sheldrick, 2015)'
_computing_structure_solution     ?
_refine_diff_density_max          0.929
_refine_diff_density_min          -2.031
_refine_diff_density_rms          0.114
_refine_ls_extinction_coef        .
_refine_ls_extinction_method      none
_refine_ls_goodness_of_fit_ref    1.042
_refine_ls_hydrogen_treatment     constr
_refine_ls_matrix_type            full
_refine_ls_number_parameters      187
_refine_ls_number_reflns          4244
_refine_ls_number_restraints      284
_refine_ls_R_factor_all           0.0772
_refine_ls_R_factor_gt            0.0730
_refine_ls_restrained_S_all       1.109
_refine_ls_shift/su_max           0.000
_refine_ls_shift/su_mean          0.000
_refine_ls_structure_factor_coef  Fsqd
_refine_ls_weighting_details
'w=1/[\s^2^(Fo^2^)+(0.1076P)^2^+317.9772P] where P=(Fo^2^+2Fc^2^)/3'
_refine_ls_weighting_scheme       calc
_refine_ls_wR_factor_gt           0.1992
_refine_ls_wR_factor_ref          0.2035
_refine_special_details           ?
_olex2_refinement_description
;
1. Fixed Uiso
 At 1.2 times of:
  All C(H) groups
2. Restrained distances
 C8-C9A = C9A-C10A = C10A-C11 = C11-C12A = C12A-C13A = C13A-C8
 1.39 with sigma of 0.01
 C8-C10A = C9A-C11 = C10A-C12A = C11-C13A = C12A-C8 = C13A-C9A
 2.4 with sigma of 0.01
 C9A-C12A = C10A-C13A
 2.8 with sigma of 0.01
3. Restrained planarity
 C8, C9A, C10A, C11, C12A, C13A
 with sigma of 0.01
4. Rigid bond restraints
 C2, C3, C4, C5, C6, C7
 with sigma for 1-2 distances of 0.01 and sigma for 1-3 distances of 0.01
 C8, C9, C10, C11, C12, C13, C9A, C10A, C12A, C13A
 with sigma for 1-2 distances of 0.01 and sigma for 1-3 distances of 0.01
 O1, O2, C1
 with sigma for 1-2 distances of 0.01 and sigma for 1-3 distances of 0.01
 Zr2, O3, O4, O2
 with sigma for 1-2 distances of 0.005 and sigma for 1-3 distances of 0.005
5. Uiso/Uaniso restraints and constraints
O1 \\sim O2 \\sim C1: within 2A with sigma of 0.04 and sigma for terminal atoms
of 0.08
C2 \\sim C3 \\sim C4 \\sim C5 \\sim C6 \\sim C7: within 2A with sigma of 0.01
and sigma for terminal atoms of 0.02
C8 \\sim C9 \\sim C10 \\sim C11 \\sim C12 \\sim C13 \\sim C9A \\sim C10A \\sim
C12A \\sim C13A: within 2A with sigma of 0.01 and sigma for terminal atoms of
0.02
Zr2 \\sim O3 \\sim O4 \\sim O2: within 2A with sigma of 0.005 and sigma for
terminal atoms of 0.02
Uanis(O5) \\sim Ueq, Uanis(O6) \\sim Ueq, Uanis(C2) \\sim Ueq, Uanis(C3) \\sim
Ueq, Uanis(C4) \\sim Ueq, Uanis(C5) \\sim Ueq, Uanis(C6) \\sim Ueq, Uanis(C7)
\\sim Ueq, Uanis(O1) \\sim Ueq: with sigma of 0.01 and sigma for terminal atoms
of 0.02
6. Others
 Fixed Sof: C9(0.5) H9(0.5) C10(0.5) H10(0.5) C12(0.5) H12(0.5) C13(0.5)
 H13(0.5) C9A(0.5) H9A(0.5) C10A(0.5) H10A(0.5) C12A(0.5) H12A(0.5) C13A(0.5)
 H13A(0.5)
7.a Aromatic/amide H refined with riding coordinates:
 C3(H3), C4(H4), C6(H6), C7(H7), C9(H9), C10(H10), C12(H12), C13(H13),
 C9A(H9A), C10A(H10A), C12A(H12A), C13A(H13A)
7.b Fitted hexagon refined as free rotating group:
 C2(C3,C4,C5,C6,C7), C8(C9,C10,C11,C12,C13)
;
_atom_sites_solution_hydrogens    geom
_atom_sites_solution_primary      ?
_atom_sites_solution_secondary    ?
loop_
  _atom_site_label
  _atom_site_type_symbol
  _atom_site_fract_x
  _atom_site_fract_y
  _atom_site_fract_z
  _atom_site_U_iso_or_equiv
  _atom_site_adp_type
  _atom_site_occupancy
  _atom_site_site_symmetry_order
  _atom_site_calc_flag
  _atom_site_refinement_flags_posn
  _atom_site_refinement_flags_adp
  _atom_site_refinement_flags_occupancy
  _atom_site_disorder_assembly
  _atom_site_disorder_group
 Zr1 Zr 0.10901(5) 0.06159(3) 0.0000 0.0628(3) Uani 1 2 d S T P . .
 Zr2 Zr 0.0000 0.0000 0.05971(2) 0.0239(2) Uani 1 4 d S TU P . .
 O1 O 0.1516(4) 0.0870(2) 0.04911(11) 0.107(2) Uani 1 1 d . U . . .
 O2 O 0.0820(2) 0.04634(14) 0.08743(8) 0.0500(10) Uani 1 1 d . U . . .
 O3 O 0.0000 0.0619(3) 0.02906(16) 0.086(2) Uani 1 2 d S TU P . .
 O4 O 0.1084(5) 0.0000 0.02868(16) 0.084(2) Uani 1 2 d S TU P . .
 O5 O 0.1023(9) 0.1391(3) 0.0000 0.142(4) Uani 1 2 d S TU P . .
 O6 O 0.2466(6) 0.0586(5) 0.0000 0.134(4) Uani 1 2 d S TU P . .
 C1 C 0.1353(5) 0.0759(3) 0.07879(14) 0.080(2) Uani 1 1 d . U . . .
 C2 C 0.1760(4) 0.1045(2) 0.10443(10) 0.093(2) Uani 1 1 d . U . . .
 C3 C 0.1785(4) 0.08661(18) 0.13598(12) 0.100(2) Uani 1 1 d G U . . .
 H3 H 0.1503 0.0583 0.1410 0.120 Uiso 1 1 calc R . . . .
 C4 C 0.2224(4) 0.1101(2) 0.16019(9) 0.104(2) Uani 1 1 d G U . . .
 H4 H 0.2241 0.0979 0.1818 0.125 Uiso 1 1 calc R . . . .
 C5 C 0.2637(4) 0.1516(2) 0.15284(11) 0.091(2) Uani 1 1 d G U . . .
 C6 C 0.2612(4) 0.16944(19) 0.12129(13) 0.116(3) Uani 1 1 d G U . . .
 H6 H 0.2895 0.1977 0.1163 0.139 Uiso 1 1 calc R . . . .
 C7 C 0.2174(4) 0.1459(2) 0.09708(10) 0.115(3) Uani 1 1 d G U . . .
 H7 H 0.2157 0.1581 0.0755 0.137 Uiso 1 1 calc R . . . .
 C8 C 0.3164(3) 0.1755(2) 0.17830(12) 0.0783(18) Uani 1 1 d D U . . .
 C9 C 0.3013(4) 0.1679(2) 0.21130(14) 0.077(2) Uani 0.5 1 d G U . A 1
 H9 H 0.2598 0.1461 0.2179 0.093 Uiso 0.5 1 calc R . . A 1
 C10 C 0.3468(4) 0.1921(3) 0.23468(9) 0.075(2) Uani 0.5 1 d G U . A 1
 H10 H 0.3364 0.1869 0.2572 0.090 Uiso 0.5 1 calc R . . A 1
 C11 C 0.4074(3) 0.2239(2) 0.22507(11) 0.0671(16) Uani 1 1 d DG U . A .
 C12 C 0.4225(4) 0.2315(2) 0.19207(13) 0.071(2) Uani 0.5 1 d G U . A 1
 H12 H 0.4639 0.2532 0.1855 0.085 Uiso 0.5 1 calc R . . A 1
 C13 C 0.3770(4) 0.2073(3) 0.16869(9) 0.075(2) Uani 0.5 1 d G U . A 1
 H13 H 0.3873 0.2124 0.1461 0.090 Uiso 0.5 1 calc R . . A 1
 C14 C 0.4581(5) 0.2500 0.2500 0.061(3) Uani 1 2 d S T P . .
 C9A C 0.3689(6) 0.1511(3) 0.1994(2) 0.085(3) Uani 0.5 1 d D U . A 2
 H9A H 0.3738 0.1180 0.1976 0.101 Uiso 0.5 1 calc R . . A 2
 C10A C 0.4141(5) 0.1753(3) 0.2229(2) 0.081(2) Uani 0.5 1 d D U . A 2
 H10A H 0.4495 0.1587 0.2375 0.097 Uiso 0.5 1 calc R . . A 2
 C12A C 0.3542(6) 0.2478(3) 0.2045(2) 0.083(2) Uani 0.5 1 d D U . A 2
 H12A H 0.3486 0.2809 0.2065 0.100 Uiso 0.5 1 calc R . . A 2
 C13A C 0.3085(5) 0.2237(3) 0.1809(2) 0.086(3) Uani 0.5 1 d D U . A 2
 H13A H 0.2722 0.2402 0.1667 0.103 Uiso 0.5 1 calc R . . A 2

loop_
  _atom_site_aniso_label
  _atom_site_aniso_U_11
  _atom_site_aniso_U_22
  _atom_site_aniso_U_33
  _atom_site_aniso_U_23
  _atom_site_aniso_U_13
  _atom_site_aniso_U_12
 Zr1 0.0767(6) 0.0930(6) 0.0187(4) 0.000 0.000 -0.0642(5)
 Zr2 0.0247(4) 0.0355(4) 0.0115(4) 0.000 0.000 0.000
 O1 0.134(5) 0.147(5) 0.040(2) -0.008(3) -0.008(3) -0.103(4)
 O2 0.056(2) 0.067(2) 0.0264(17) -0.0081(16) -0.0116(16) -0.0250(19)
 O3 0.083(5) 0.128(6) 0.047(4) 0.061(4) 0.000 0.000
 O4 0.117(6) 0.091(5) 0.044(3) 0.000 0.058(4) 0.000
 O5 0.261(12) 0.084(5) 0.081(6) 0.000 0.000 -0.099(7)
 O6 0.075(5) 0.259(11) 0.068(5) 0.000 0.000 -0.097(7)
 C1 0.099(6) 0.115(6) 0.025(3) -0.006(3) -0.012(3) -0.063(5)
 C2 0.108(5) 0.117(5) 0.054(3) -0.011(3) -0.020(3) -0.056(4)
 C3 0.117(5) 0.127(5) 0.057(3) -0.016(3) -0.014(4) -0.057(4)
 C4 0.116(5) 0.134(5) 0.063(4) -0.022(4) -0.018(4) -0.055(4)
 C5 0.099(4) 0.116(5) 0.059(3) -0.029(3) -0.014(4) -0.043(4)
 C6 0.133(5) 0.130(5) 0.085(4) -0.016(4) -0.022(4) -0.056(4)
 C7 0.131(5) 0.129(5) 0.084(4) -0.008(4) -0.028(4) -0.062(4)
 C8 0.053(3) 0.114(4) 0.068(3) -0.043(3) -0.016(3) -0.019(3)
 C9 0.061(5) 0.109(5) 0.062(4) -0.040(4) -0.018(4) -0.020(4)
 C10 0.054(5) 0.110(5) 0.061(4) -0.044(4) -0.014(4) -0.015(4)
 C11 0.033(2) 0.109(4) 0.059(3) -0.057(3) -0.002(2) -0.002(3)
 C12 0.038(4) 0.111(5) 0.064(4) -0.053(4) -0.009(4) -0.005(4)
 C13 0.048(4) 0.113(6) 0.065(4) -0.049(4) -0.014(4) -0.007(4)
 C14 0.027(4) 0.097(7) 0.058(5) -0.053(5) 0.000 0.000
 C9A 0.074(5) 0.111(5) 0.068(5) -0.040(4) -0.020(4) -0.022(5)
 C10A 0.064(5) 0.113(5) 0.066(5) -0.042(5) -0.018(4) -0.014(5)
 C12A 0.055(4) 0.116(5) 0.078(5) -0.058(4) -0.018(4) 0.006(4)
 C13A 0.059(5) 0.120(5) 0.078(5) -0.055(5) -0.020(4) -0.001(5)

_geom_special_details
;
 All esds (except the esd in the dihedral angle between two l.s. planes)
 are estimated using the full covariance matrix.  The cell esds are taken
 into account individually in the estimation of esds in distances, angles
 and torsion angles; correlations between esds in cell parameters are only
 used when they are defined by crystal symmetry.  An approximate (isotropic)
 treatment of cell esds is used for estimating esds involving l.s. planes.
;
loop_
  _geom_bond_atom_site_label_1
  _geom_bond_atom_site_label_2
  _geom_bond_distance
  _geom_bond_site_symmetry_2
  _geom_bond_publ_flag
 Zr1 Zr1 3.5168(18) 3 ?
 Zr1 Zr1 3.5116(17) 19 ?
 Zr1 Zr2 3.4863(6) 17 ?
 Zr1 Zr2 3.4864(6) . ?
 Zr1 O1 2.245(5) . ?
 Zr1 O1 2.245(5) 18 ?
 Zr1 O3 2.121(4) 18 ?
 Zr1 O3 2.121(4) . ?
 Zr1 O4 2.114(4) 18 ?
 Zr1 O4 2.115(4) . ?
 Zr1 O5 2.215(9) . ?
 Zr1 O6 2.218(9) . ?
 Zr2 Zr1 3.4864(6) 3 ?
 Zr2 Zr1 3.4864(6) 19 ?
 Zr2 Zr1 3.4864(6) 17 ?
 Zr2 O2 2.187(3) 19 ?
 Zr2 O2 2.187(3) 2 ?
 Zr2 O2 2.187(3) 20 ?
 Zr2 O2 2.187(3) . ?
 Zr2 O3 2.168(6) 2 ?
 Zr2 O3 2.168(6) . ?
 Zr2 O4 2.160(6) . ?
 Zr2 O4 2.160(6) 2 ?
 O1 C1 1.283(8) . ?
 O2 C1 1.255(8) . ?
 O3 Zr1 2.121(4) 19 ?
 O4 Zr1 2.115(4) 3 ?
 C1 C2 1.483(7) . ?
 C2 C3 1.3900 . ?
 C2 C7 1.3900 . ?
 C3 H3 0.9500 . ?
 C3 C4 1.3900 . ?
 C4 H4 0.9500 . ?
 C4 C5 1.3900 . ?
 C5 C6 1.3900 . ?
 C5 C8 1.508(4) . ?
 C6 H6 0.9500 . ?
 C6 C7 1.3900 . ?
 C7 H7 0.9500 . ?
 C8 C9 1.3900 . ?
 C8 C13 1.3900 . ?
 C8 C9A 1.395(7) . ?
 C8 C13A 1.386(7) . ?
 C9 H9 0.9500 . ?
 C9 C10 1.3900 . ?
 C10 H10 0.9500 . ?
 C10 C11 1.3900 . ?
 C11 C12 1.3900 . ?
 C11 C14 1.505(5) . ?
 C11 C10A 1.396(7) . ?
 C11 C12A 1.382(7) . ?
 C12 H12 0.9500 . ?
 C12 C13 1.3900 . ?
 C13 H13 0.9500 . ?
 C14 C11 1.505(7) 7 ?
 C14 C14 1.350(15) 21_655 ?
 C9A H9A 0.9500 . ?
 C9A C10A 1.391(7) . ?
 C10A H10A 0.9500 . ?
 C12A H12A 0.9500 . ?
 C12A C13A 1.398(7) . ?
 C13A H13A 0.9500 . ?

loop_
  _geom_angle_atom_site_label_1
  _geom_angle_atom_site_label_2
  _geom_angle_atom_site_label_3
  _geom_angle
  _geom_angle_site_symmetry_1
  _geom_angle_site_symmetry_3
  _geom_angle_publ_flag
 Zr1 Zr1 Zr1 90.0 19 3 ?
 Zr2 Zr1 Zr1 59.711(16) 17 3 ?
 Zr2 Zr1 Zr1 59.711(16) . 3 ?
 Zr2 Zr1 Zr1 59.761(15) . 19 ?
 Zr2 Zr1 Zr1 59.760(15) 17 19 ?
 Zr2 Zr1 Zr2 89.08(2) 17 . ?
 O1 Zr1 Zr1 108.84(18) 18 3 ?
 O1 Zr1 Zr1 107.78(18) 18 19 ?
 O1 Zr1 Zr1 107.78(18) . 19 ?
 O1 Zr1 Zr1 108.84(18) . 3 ?
 O1 Zr1 Zr2 71.84(12) . . ?
 O1 Zr1 Zr2 71.84(12) 18 17 ?
 O1 Zr1 Zr2 160.91(13) . 17 ?
 O1 Zr1 Zr2 160.91(13) 18 . ?
 O1 Zr1 O1 127.2(2) . 18 ?
 O3 Zr1 Zr1 34.13(15) . 19 ?
 O3 Zr1 Zr1 34.13(15) 18 19 ?
 O3 Zr1 Zr1 90.3(2) . 3 ?
 O3 Zr1 Zr1 90.3(2) 18 3 ?
 O3 Zr1 Zr2 88.8(2) . 17 ?
 O3 Zr1 Zr2 36.08(18) 18 17 ?
 O3 Zr1 Zr2 36.08(18) . . ?
 O3 Zr1 Zr2 88.8(2) 18 . ?
 O3 Zr1 O1 75.4(2) 18 18 ?
 O3 Zr1 O1 138.9(2) 18 . ?
 O3 Zr1 O1 75.4(2) . . ?
 O3 Zr1 O1 138.9(2) . 18 ?
 O3 Zr1 O3 68.3(3) . 18 ?
 O3 Zr1 O5 87.4(4) . . ?
 O3 Zr1 O5 87.4(4) 18 . ?
 O3 Zr1 O6 145.82(14) 18 . ?
 O3 Zr1 O6 145.82(14) . . ?
 O4 Zr1 Zr1 89.7(2) . 19 ?
 O4 Zr1 Zr1 89.7(2) 18 19 ?
 O4 Zr1 Zr1 33.74(15) 18 3 ?
 O4 Zr1 Zr1 33.74(15) . 3 ?
 O4 Zr1 Zr2 88.2(2) 18 . ?
 O4 Zr1 Zr2 35.79(17) . . ?
 O4 Zr1 Zr2 88.2(2) . 17 ?
 O4 Zr1 Zr2 35.79(17) 18 17 ?
 O4 Zr1 O1 76.8(2) 18 18 ?
 O4 Zr1 O1 140.1(2) 18 . ?
 O4 Zr1 O1 140.1(2) . 18 ?
 O4 Zr1 O1 76.8(2) . . ?
 O4 Zr1 O3 108.2(3) 18 . ?
 O4 Zr1 O3 71.8(3) 18 18 ?
 O4 Zr1 O3 71.8(3) . . ?
 O4 Zr1 O3 108.2(3) . 18 ?
 O4 Zr1 O4 67.5(3) 18 . ?
 O4 Zr1 O5 146.14(14) 18 . ?
 O4 Zr1 O5 146.14(14) . . ?
 O4 Zr1 O6 88.4(4) 18 . ?
 O4 Zr1 O6 88.4(4) . . ?
 O5 Zr1 Zr1 87.2(4) . 19 ?
 O5 Zr1 Zr1 177.2(4) . 3 ?
 O5 Zr1 Zr2 118.6(2) . . ?
 O5 Zr1 Zr2 118.6(2) . 17 ?
 O5 Zr1 O1 72.1(2) . . ?
 O5 Zr1 O1 72.1(2) . 18 ?
 O5 Zr1 O6 95.0(5) . . ?
 O6 Zr1 Zr1 87.8(3) . 3 ?
 O6 Zr1 Zr1 177.8(3) . 19 ?
 O6 Zr1 Zr2 118.9(2) . . ?
 O6 Zr1 Zr2 118.9(2) . 17 ?
 O6 Zr1 O1 73.0(2) . 18 ?
 O6 Zr1 O1 73.0(2) . . ?
 Zr1 Zr2 Zr1 60.48(3) . 19 ?
 Zr1 Zr2 Zr1 60.58(3) . 3 ?
 Zr1 Zr2 Zr1 60.48(3) 17 3 ?
 Zr1 Zr2 Zr1 90.92(2) 3 19 ?
 Zr1 Zr2 Zr1 60.58(3) 17 19 ?
 Zr1 Zr2 Zr1 90.92(2) . 17 ?
 O2 Zr2 Zr1 111.42(11) 19 17 ?
 O2 Zr2 Zr1 111.28(11) . 19 ?
 O2 Zr2 Zr1 75.81(10) 2 17 ?
 O2 Zr2 Zr1 75.81(10) . . ?
 O2 Zr2 Zr1 166.73(10) 20 19 ?
 O2 Zr2 Zr1 111.42(11) 20 . ?
 O2 Zr2 Zr1 166.73(10) . 17 ?
 O2 Zr2 Zr1 111.28(11) 2 3 ?
 O2 Zr2 Zr1 111.42(11) 2 19 ?
 O2 Zr2 Zr1 75.81(10) 20 3 ?
 O2 Zr2 Zr1 75.81(10) 19 19 ?
 O2 Zr2 Zr1 166.73(10) 19 3 ?
 O2 Zr2 Zr1 111.28(11) 20 17 ?
 O2 Zr2 Zr1 111.28(11) 19 . ?
 O2 Zr2 Zr1 111.42(11) . 3 ?
 O2 Zr2 Zr1 166.73(10) 2 . ?
 O2 Zr2 O2 74.3(2) . 19 ?
 O2 Zr2 O2 74.3(2) 2 20 ?
 O2 Zr2 O2 117.5(2) . 2 ?
 O2 Zr2 O2 74.5(2) 2 19 ?
 O2 Zr2 O2 117.5(2) 20 19 ?
 O2 Zr2 O2 74.5(2) . 20 ?
 O3 Zr2 Zr1 90.3(2) 2 19 ?
 O3 Zr2 Zr1 35.18(11) . . ?
 O3 Zr2 Zr1 35.18(11) . 19 ?
 O3 Zr2 Zr1 35.18(11) 2 3 ?
 O3 Zr2 Zr1 90.3(2) 2 . ?
 O3 Zr2 Zr1 35.18(11) 2 17 ?
 O3 Zr2 Zr1 90.3(2) . 17 ?
 O3 Zr2 Zr1 90.3(2) . 3 ?
 O3 Zr2 O2 78.9(2) . 19 ?
 O3 Zr2 O2 142.54(12) . 20 ?
 O3 Zr2 O2 142.54(12) . 2 ?
 O3 Zr2 O2 142.54(12) 2 19 ?
 O3 Zr2 O2 78.9(2) 2 2 ?
 O3 Zr2 O2 142.54(12) 2 . ?
 O3 Zr2 O2 78.9(2) 2 20 ?
 O3 Zr2 O2 78.9(2) . . ?
 O3 Zr2 O3 109.2(5) 2 . ?
 O4 Zr2 Zr1 34.92(11) 2 19 ?
 O4 Zr2 Zr1 89.68(19) 2 3 ?
 O4 Zr2 Zr1 34.92(11) . 3 ?
 O4 Zr2 Zr1 89.68(19) . 17 ?
 O4 Zr2 Zr1 34.92(11) . . ?
 O4 Zr2 Zr1 89.7(2) 2 . ?
 O4 Zr2 Zr1 34.92(11) 2 17 ?
 O4 Zr2 Zr1 89.68(19) . 19 ?
 O4 Zr2 O2 142.52(12) . 2 ?
 O4 Zr2 O2 79.5(2) 2 19 ?
 O4 Zr2 O2 79.5(2) 2 2 ?
 O4 Zr2 O2 142.52(12) . 19 ?
 O4 Zr2 O2 142.52(12) 2 . ?
 O4 Zr2 O2 142.52(12) 2 20 ?
 O4 Zr2 O2 79.5(2) . . ?
 O4 Zr2 O2 79.5(2) . 20 ?
 O4 Zr2 O3 70.08(15) 2 . ?
 O4 Zr2 O3 70.08(15) . 2 ?
 O4 Zr2 O3 70.08(15) 2 2 ?
 O4 Zr2 O3 70.08(15) . . ?
 O4 Zr2 O4 107.9(4) 2 . ?
 C1 O1 Zr1 134.9(4) . . ?
 C1 O2 Zr2 132.4(4) . . ?
 Zr1 O3 Zr1 111.7(3) 19 . ?
 Zr1 O3 Zr2 108.7(3) 19 . ?
 Zr1 O3 Zr2 108.7(3) . . ?
 Zr1 O4 Zr1 112.5(3) . 3 ?
 Zr1 O4 Zr2 109.3(2) . . ?
 Zr1 O4 Zr2 109.3(2) 3 . ?
 O1 C1 C2 116.4(6) . . ?
 O2 C1 O1 125.0(5) . . ?
 O2 C1 C2 118.3(5) . . ?
 C3 C2 C1 117.9(4) . . ?
 C3 C2 C7 120.0 . . ?
 C7 C2 C1 121.8(4) . . ?
 C2 C3 H3 120.0 . . ?
 C4 C3 C2 120.0 . . ?
 C4 C3 H3 120.0 . . ?
 C3 C4 H4 120.0 . . ?
 C3 C4 C5 120.0 . . ?
 C5 C4 H4 120.0 . . ?
 C4 C5 C8 120.3(4) . . ?
 C6 C5 C4 120.0 . . ?
 C6 C5 C8 119.5(4) . . ?
 C5 C6 H6 120.0 . . ?
 C7 C6 C5 120.0 . . ?
 C7 C6 H6 120.0 . . ?
 C2 C7 H7 120.0 . . ?
 C6 C7 C2 120.0 . . ?
 C6 C7 H7 120.0 . . ?
 C9 C8 C5 120.2(4) . . ?
 C9 C8 C13 120.0 . . ?
 C13 C8 C5 119.7(4) . . ?
 C9A C8 C5 122.9(5) . . ?
 C13A C8 C5 116.8(6) . . ?
 C13A C8 C9A 120.2(4) . . ?
 C8 C9 H9 120.0 . . ?
 C8 C9 C10 120.0 . . ?
 C10 C9 H9 120.0 . . ?
 C9 C10 H10 120.0 . . ?
 C11 C10 C9 120.0 . . ?
 C11 C10 H10 120.0 . . ?
 C10 C11 C14 120.8(4) . . ?
 C12 C11 C10 120.0 . . ?
 C12 C11 C14 119.2(4) . . ?
 C10A C11 C14 119.5(5) . . ?
 C12A C11 C14 120.3(5) . . ?
 C12A C11 C10A 120.1(4) . . ?
 C11 C12 H12 120.0 . . ?
 C11 C12 C13 120.0 . . ?
 C13 C12 H12 120.0 . . ?
 C8 C13 H13 120.0 . . ?
 C12 C13 C8 120.0 . . ?
 C12 C13 H13 120.0 . . ?
 C11 C14 C11 114.2(7) . 7 ?
 C14 C14 C11 122.9(5) 21_655 7 ?
 C14 C14 C11 122.9(3) 21_655 . ?
 C8 C9A H9A 120.0 . . ?
 C10A C9A C8 120.0(5) . . ?
 C10A C9A H9A 120.0 . . ?
 C11 C10A H10A 120.1 . . ?
 C9A C10A C11 119.7(5) . . ?
 C9A C10A H10A 120.1 . . ?
 C11 C12A H12A 119.9 . . ?
 C11 C12A C13A 120.2(5) . . ?
 C13A C12A H12A 119.9 . . ?
 C8 C13A C12A 119.7(5) . . ?
 C8 C13A H13A 120.2 . . ?
 C12A C13A H13A 120.2 . . ?

loop_
  _geom_torsion_atom_site_label_1
  _geom_torsion_atom_site_label_2
  _geom_torsion_atom_site_label_3
  _geom_torsion_atom_site_label_4
  _geom_torsion
  _geom_torsion_site_symmetry_1
  _geom_torsion_site_symmetry_2
  _geom_torsion_site_symmetry_3
  _geom_torsion_site_symmetry_4
  _geom_torsion_publ_flag
 Zr1 O1 C1 O2 -4.4(17) . . . . ?
 Zr1 O1 C1 C2 -177.0(6) . . . . ?
 Zr2 O2 C1 O1 2.8(15) . . . . ?
 Zr2 O2 C1 C2 175.3(5) . . . . ?
 O1 C1 C2 C3 -163.0(7) . . . . ?
 O1 C1 C2 C7 11.2(12) . . . . ?
 O2 C1 C2 C3 23.9(11) . . . . ?
 O2 C1 C2 C7 -161.9(6) . . . . ?
 C1 C2 C3 C4 174.3(7) . . . . ?
 C1 C2 C7 C6 -174.1(8) . . . . ?
 C2 C3 C4 C5 0.0 . . . . ?
 C3 C2 C7 C6 0.0 . . . . ?
 C3 C4 C5 C6 0.0 . . . . ?
 C3 C4 C5 C8 -175.6(6) . . . . ?
 C4 C5 C6 C7 0.0 . . . . ?
 C4 C5 C8 C9 -24.1(7) . . . . ?
 C4 C5 C8 C13 159.7(5) . . . . ?
 C4 C5 C8 C9A 41.6(7) . . . . ?
 C4 C5 C8 C13A -136.3(6) . . . . ?
 C5 C6 C7 C2 0.0 . . . . ?
 C5 C8 C9 C10 -176.2(6) . . . . ?
 C5 C8 C13 C12 176.2(6) . . . . ?
 C5 C8 C9A C10A -178.3(5) . . . . ?
 C5 C8 C13A C12A 178.5(6) . . . . ?
 C6 C5 C8 C9 160.3(5) . . . . ?
 C6 C5 C8 C13 -15.9(7) . . . . ?
 C6 C5 C8 C9A -134.1(6) . . . . ?
 C6 C5 C8 C13A 48.1(7) . . . . ?
 C7 C2 C3 C4 0.0 . . . . ?
 C8 C5 C6 C7 175.7(6) . . . . ?
 C8 C9 C10 C11 0.0 . . . . ?
 C8 C9A C10A C11 -0.7(3) . . . . ?
 C9 C8 C13 C12 0.0 . . . . ?
 C9 C10 C11 C12 0.0 . . . . ?
 C9 C10 C11 C14 -179.2(5) . . . . ?
 C10 C11 C12 C13 0.0 . . . . ?
 C10 C11 C14 C11 -54.0(8) . . . 7 ?
 C10 C11 C14 C14 126.0(4) . . . 21_655 ?
 C11 C12 C13 C8 0.0 . . . . ?
 C11 C12A C13A C8 0.4(8) . . . . ?
 C12 C11 C14 C11 126.8(9) . . . 7 ?
 C12 C11 C14 C14 -53.2(5) . . . 21_655 ?
 C13 C8 C9 C10 0.0 . . . . ?
 C14 C11 C12 C13 179.2(5) . . . . ?
 C14 C11 C10A C9A -178.4(5) . . . . ?
 C14 C11 C12A C13A 178.6(6) . . . . ?
 C9A C8 C13A C12A 0.7(6) . . . . ?
 C10A C11 C14 C11 -118.3(8) . . . 7 ?
 C10A C11 C14 C14 61.7(6) . . . 21_655 ?
 C10A C11 C12A C13A -1.7(8) . . . . ?
 C12A C11 C14 C11 61.5(7) . . . 7 ?
 C12A C11 C14 C14 -118.5(5) . . . 21_655 ?
 C12A C11 C10A C9A 1.8(6) . . . . ?
 C13A C8 C9A C10A -0.5(3) . . . . ?

_shelx_fab_file
;
 0 0 4 262.28 0.00
 0 0 6 -163.89 0.00
 0 0 8 -198.91 0.00
 0 0 10 -277.32 0.00
 0 0 12 -189.79 0.00
 0 0 14 -146.72 0.00
 0 0 16 31.05 0.00
 0 0 18 73.57 0.00
 0 0 20 164.03 0.00
 0 0 22 5.48 0.00
 0 0 24 30.43 0.00
 0 0 26 42.37 0.00
 0 0 28 -57.77 0.00
 0 0 30 5.21 0.00
 0 0 34 -21.20 0.00
 0 0 36 3.51 0.00
 0 0 38 16.71 0.00
 0 0 40 -3.78 0.00
 0 0 42 2.89 0.00
 0 0 44 14.41 0.00
 0 0 46 -9.60 0.00
 0 2 2 -870.87 0.00
 0 2 4 44.35 0.00
 0 2 6 38.48 0.00
 0 2 8 -13.23 0.00
 0 2 10 17.52 0.00
 0 2 12 52.67 0.00
 0 2 14 -41.67 0.00
 0 2 16 -29.75 0.00
 0 2 18 -39.11 0.00
 0 2 20 25.59 0.00
 0 2 22 -52.75 0.00
 0 2 24 7.25 0.00
 0 2 26 33.00 0.00
 0 2 28 -26.86 0.00
 0 2 30 16.80 0.00
 0 2 32 -6.46 0.00
 0 2 34 -15.27 0.00
 0 2 36 6.65 0.00
 0 2 38 13.20 0.00
 0 2 40 -10.82 0.00
 0 2 42 -5.81 0.00
 0 2 44 2.58 0.00
 0 2 46 -3.09 0.00
 0 4 0 458.47 0.00
 0 4 2 37.49 0.00
 0 4 4 -11.72 0.00
 0 4 6 -33.20 0.00
 0 4 8 -149.76 0.00
 0 4 10 71.26 0.00
 0 4 12 38.19 0.00
 0 4 14 5.87 0.00
 0 4 16 -39.30 0.00
 0 4 18 51.78 0.00
 0 4 20 37.75 0.00
 0 4 22 -30.57 0.00
 0 4 24 12.05 0.00
 0 4 26 10.47 0.00
 0 4 28 -13.67 0.00
 0 4 30 -3.90 0.00
 0 4 32 11.15 0.00
 0 4 34 -15.53 0.00
 0 4 36 6.18 0.00
 0 4 38 0.34 0.00
 0 4 40 -3.67 0.00
 0 4 42 3.79 0.00
 0 4 44 2.41 0.00
 0 4 46 3.73 0.00
 0 6 0 42.60 0.00
 0 6 2 93.79 0.00
 0 6 4 -190.04 0.00
 0 6 6 239.14 0.00
 0 6 8 -108.66 0.00
 0 6 10 96.39 0.00
 0 6 12 24.59 0.00
 0 6 14 88.63 0.00
 0 6 16 -88.14 0.00
 0 6 18 17.55 0.00
 0 6 20 2.33 0.00
 0 6 22 -53.41 0.00
 0 6 24 0.03 0.00
 0 6 26 -7.05 0.00
 0 6 28 4.92 0.00
 0 6 30 4.54 0.00
 0 6 32 16.39 0.00
 0 6 34 -3.70 0.00
 0 6 36 15.66 0.00
 0 6 38 -4.82 0.00
 0 6 40 1.82 0.00
 0 6 42 1.30 0.00
 0 6 44 -2.67 0.00
 0 6 46 -0.16 0.00
 0 8 0 -126.76 0.00
 0 8 2 1.17 0.00
 0 8 4 -249.35 0.00
 0 8 6 100.87 0.00
 0 8 8 -152.04 0.00
 0 8 10 108.97 0.00
 0 8 12 4.45 0.00
 0 8 14 88.49 0.00
 0 8 16 -40.39 0.00
 0 8 18 -22.30 0.00
 0 8 20 -21.93 0.00
 0 8 22 -35.13 0.00
 0 8 24 19.34 0.00
 0 8 26 -2.68 0.00
 0 8 28 3.80 0.00
 0 8 30 16.54 0.00
 0 8 32 -2.04 0.00
 0 8 34 -4.44 0.00
 0 8 36 6.92 0.00
 0 8 38 0.11 0.00
 0 8 40 -2.29 0.00
 0 8 42 -3.98 0.00
 0 8 44 3.40 0.00
 0 8 46 6.95 0.00
 0 10 0 72.87 0.00
 0 10 2 -8.68 0.00
 0 10 4 -63.91 0.00
 0 10 6 113.50 0.00
 0 10 8 -10.02 0.00
 0 10 10 55.31 0.00
 0 10 12 -14.71 0.00
 0 10 14 21.00 0.00
 0 10 16 -28.34 0.00
 0 10 18 -3.59 0.00
 0 10 20 20.98 0.00
 0 10 22 5.34 0.00
 0 10 24 1.46 0.00
 0 10 26 -1.91 0.00
 0 10 28 -12.80 0.00
 0 10 30 12.08 0.00
 0 10 32 -4.10 0.00
 0 10 34 -8.74 0.00
 0 10 36 -4.36 0.00
 0 10 38 8.42 0.00
 0 10 40 2.31 0.00
 0 10 42 0.89 0.00
 0 10 44 0.70 0.00
 0 12 0 137.29 0.00
 0 12 2 -131.32 0.00
 0 12 4 -8.96 0.00
 0 12 6 -8.38 0.00
 0 12 8 -114.10 0.00
 0 12 10 -83.84 0.00
 0 12 12 37.19 0.00
 0 12 14 43.69 0.00
 0 12 16 12.33 0.00
 0 12 18 -8.54 0.00
 0 12 20 9.83 0.00
 0 12 22 3.87 0.00
 0 12 24 -11.47 0.00
 0 12 26 -0.31 0.00
 0 12 28 -22.72 0.00
 0 12 30 4.29 0.00
 0 12 32 -6.30 0.00
 0 12 34 5.59 0.00
 0 12 36 2.31 0.00
 0 12 38 9.78 0.00
 0 12 40 0.30 0.00
 0 12 42 -2.04 0.00
 0 12 44 10.40 0.00
 0 14 0 171.08 0.00
 0 14 2 -52.17 0.00
 0 14 4 79.54 0.00
 0 14 6 -5.56 0.00
 0 14 8 -35.44 0.00
 0 14 10 5.22 0.00
 0 14 12 27.62 0.00
 0 14 14 -48.56 0.00
 0 14 16 3.76 0.00
 0 14 18 -19.29 0.00
 0 14 20 11.47 0.00
 0 14 22 -3.43 0.00
 0 14 24 -0.96 0.00
 0 14 26 24.50 0.00
 0 14 28 -7.60 0.00
 0 14 30 1.12 0.00
 0 14 32 -6.71 0.00
 0 14 34 8.09 0.00
 0 14 36 0.52 0.00
 0 14 38 -1.32 0.00
 0 14 40 -1.62 0.00
 0 14 42 -15.55 0.00
 0 16 0 18.59 0.00
 0 16 2 -79.00 0.00
 0 16 4 6.18 0.00
 0 16 6 14.94 0.00
 0 16 8 -1.58 0.00
 0 16 10 -2.35 0.00
 0 16 12 -2.75 0.00
 0 16 14 -7.86 0.00
 0 16 16 36.94 0.00
 0 16 18 -31.82 0.00
 0 16 20 7.30 0.00
 0 16 22 7.31 0.00
 0 16 24 0.51 0.00
 0 16 26 15.76 0.00
 0 16 28 -15.56 0.00
 0 16 30 -1.85 0.00
 0 16 32 2.72 0.00
 0 16 34 -1.42 0.00
 0 16 36 5.15 0.00
 0 16 38 -14.47 0.00
 0 16 40 -0.99 0.00
 0 18 0 10.15 0.00
 0 18 2 -5.42 0.00
 0 18 4 -7.01 0.00
 0 18 6 15.04 0.00
 0 18 8 -17.00 0.00
 0 18 10 5.79 0.00
 0 18 12 2.67 0.00
 0 18 14 -2.81 0.00
 0 18 16 12.62 0.00
 0 18 18 -20.12 0.00
 0 18 20 5.12 0.00
 0 18 22 -2.33 0.00
 0 18 24 -5.93 0.00
 0 18 26 11.05 0.00
 0 18 28 -8.47 0.00
 0 18 30 3.69 0.00
 0 18 32 2.43 0.00
 0 18 34 4.50 0.00
 0 18 36 8.46 0.00
 0 18 38 -9.77 0.00
 0 20 0 6.61 0.00
 0 20 2 25.60 0.00
 0 20 4 12.71 0.00
 0 20 6 6.83 0.00
 0 20 8 -12.28 0.00
 0 20 10 15.02 0.00
 0 20 12 -10.53 0.00
 0 20 14 -4.82 0.00
 0 20 16 13.11 0.00
 0 20 18 -0.88 0.00
 0 20 20 -4.54 0.00
 0 20 22 3.45 0.00
 0 20 24 2.48 0.00
 0 20 26 4.09 0.00
 0 20 28 -2.53 0.00
 0 20 30 -0.31 0.00
 0 20 32 -2.26 0.00
 0 20 34 -1.60 0.00
 0 20 36 2.86 0.00
 0 22 0 -29.03 0.00
 0 22 2 -16.17 0.00
 0 22 4 -18.70 0.00
 0 22 6 -5.71 0.00
 0 22 8 -1.76 0.00
 0 22 10 8.85 0.00
 0 22 12 -3.94 0.00
 0 22 14 -9.91 0.00
 0 22 16 -6.06 0.00
 0 22 18 5.18 0.00
 0 22 20 4.41 0.00
 0 22 22 5.04 0.00
 0 22 24 -5.61 0.00
 0 22 26 -3.36 0.00
 0 22 28 -0.33 0.00
 0 22 30 -4.53 0.00
 0 22 32 2.29 0.00
 0 22 34 -1.87 0.00
 0 24 0 1.23 0.00
 0 24 2 19.85 0.00
 0 24 4 6.73 0.00
 0 24 6 15.22 0.00
 0 24 8 4.06 0.00
 0 24 10 -0.39 0.00
 0 24 12 3.76 0.00
 0 24 14 -3.14 0.00
 0 24 16 -0.02 0.00
 0 24 18 0.22 0.00
 0 24 20 -3.74 0.00
 0 24 22 3.24 0.00
 0 24 24 -6.33 0.00
 0 24 26 -13.57 0.00
 0 24 28 7.64 0.00
 0 24 30 6.12 0.00
 0 24 32 -1.97 0.00
 0 26 0 -7.15 0.00
 0 26 2 2.64 0.00
 0 26 4 -0.32 0.00
 0 26 6 -0.24 0.00
 0 26 8 -11.30 0.00
 0 26 10 -3.84 0.00
 0 26 12 -1.97 0.00
 0 26 14 11.86 0.00
 0 26 16 21.29 0.00
 0 26 18 15.84 0.00
 0 26 20 -1.86 0.00
 0 26 22 0.65 0.00
 0 26 24 4.29 0.00
 0 26 26 -0.67 0.00
 0 26 28 20.39 0.00
 0 28 0 1.92 0.00
 0 28 2 -2.74 0.00
 0 28 4 2.63 0.00
 0 28 6 4.90 0.00
 0 28 8 4.01 0.00
 0 28 10 2.08 0.00
 0 28 12 -1.95 0.00
 0 28 14 2.58 0.00
 0 28 16 -3.42 0.00
 0 28 18 -8.72 0.00
 0 28 20 -1.24 0.00
 0 28 22 10.52 0.00
 0 28 24 11.71 0.00
 0 30 0 -1.50 0.00
 0 30 2 -0.59 0.00
 0 30 4 -2.08 0.00
 0 30 6 -16.49 0.00
 0 30 8 4.21 0.00
 0 30 10 6.04 0.00
 0 30 12 2.15 0.00
 0 30 14 -2.50 0.00
 0 30 16 -1.63 0.00
 0 30 18 -1.02 0.00
 0 32 0 -19.33 0.00
 0 32 2 -13.68 0.00
 0 32 4 1.92 0.00
 0 32 6 -9.98 0.00
 0 32 8 5.02 0.00
 0 32 10 7.89 0.00
 0 32 12 -0.13 0.00
 1 1 1 -479.51 0.00
 1 1 3 -190.91 0.00
 1 1 5 157.11 0.00
 1 1 7 -49.00 0.00
 1 1 9 -35.59 0.00
 1 1 11 70.53 0.00
 1 1 13 93.88 0.00
 1 1 15 44.03 0.00
 1 1 17 -9.88 0.00
 1 1 19 -7.64 0.00
 1 1 21 1.36 0.00
 1 1 23 -54.36 0.00
 1 1 25 34.29 0.00
 1 1 27 -26.73 0.00
 1 1 29 -0.80 0.00
 1 1 31 16.86 0.00
 1 1 33 -1.44 0.00
 1 1 35 3.08 0.00
 1 1 37 5.96 0.00
 1 1 39 6.24 0.00
 1 1 41 -6.10 0.00
 1 1 43 6.60 0.00
 1 1 45 1.11 0.00
 1 1 47 -19.24 0.00
 1 3 1 -142.78 0.00
 1 3 3 127.61 0.00
 1 3 5 4.55 0.00
 1 3 7 16.11 0.00
 1 3 9 31.93 0.00
 1 3 11 84.68 0.00
 1 3 13 -16.92 0.00
 1 3 15 -7.56 0.00
 1 3 17 -9.03 0.00
 1 3 19 -17.52 0.00
 1 3 21 -8.61 0.00
 1 3 23 -9.59 0.00
 1 3 25 17.08 0.00
 1 3 27 -7.15 0.00
 1 3 29 -1.50 0.00
 1 3 31 18.14 0.00
 1 3 33 7.22 0.00
 1 3 35 -8.66 0.00
 1 3 37 -1.42 0.00
 1 3 39 -5.46 0.00
 1 3 41 -8.89 0.00
 1 3 43 6.25 0.00
 1 3 45 4.14 0.00
 1 3 47 -10.40 0.00
 1 5 1 140.33 0.00
 1 5 3 -32.34 0.00
 1 5 5 -60.32 0.00
 1 5 7 122.97 0.00
 1 5 9 -114.50 0.00
 1 5 11 -91.72 0.00
 1 5 13 -88.46 0.00
 1 5 15 4.48 0.00
 1 5 17 -25.71 0.00
 1 5 19 1.43 0.00
 1 5 21 -0.42 0.00
 1 5 23 23.10 0.00
 1 5 25 -4.02 0.00
 1 5 27 2.39 0.00
 1 5 29 -10.63 0.00
 1 5 31 7.30 0.00
 1 5 33 -1.02 0.00
 1 5 35 -11.18 0.00
 1 5 37 14.56 0.00
 1 5 39 5.74 0.00
 1 5 41 1.10 0.00
 1 5 43 0.80 0.00
 1 5 45 6.18 0.00
 1 5 47 -11.27 0.00
 1 7 1 18.39 0.00
 1 7 3 -76.70 0.00
 1 7 5 65.25 0.00
 1 7 7 -12.65 0.00
 1 7 9 -114.73 0.00
 1 7 11 50.49 0.00
 1 7 13 11.12 0.00
 1 7 15 63.10 0.00
 1 7 17 8.89 0.00
 1 7 19 36.83 0.00
 1 7 21 1.74 0.00
 1 7 23 -0.54 0.00
 1 7 25 6.69 0.00
 1 7 27 3.40 0.00
 1 7 29 -18.78 0.00
 1 7 31 -19.21 0.00
 1 7 33 -5.36 0.00
 1 7 35 1.49 0.00
 1 7 37 10.71 0.00
 1 7 39 0.20 0.00
 1 7 41 1.84 0.00
 1 7 43 -2.15 0.00
 1 7 45 2.87 0.00
 1 9 1 24.06 0.00
 1 9 3 40.01 0.00
 1 9 5 81.13 0.00
 1 9 7 -57.51 0.00
 1 9 9 53.57 0.00
 1 9 11 42.26 0.00
 1 9 13 -86.79 0.00
 1 9 15 -44.88 0.00
 1 9 17 -31.99 0.00
 1 9 19 6.28 0.00
 1 9 21 10.20 0.00
 1 9 23 -10.91 0.00
 1 9 25 16.45 0.00
 1 9 27 6.69 0.00
 1 9 29 0.82 0.00
 1 9 31 4.64 0.00
 1 9 33 0.90 0.00
 1 9 35 -6.93 0.00
 1 9 37 -2.19 0.00
 1 9 39 -1.49 0.00
 1 9 41 -5.27 0.00
 1 9 43 -2.29 0.00
 1 9 45 12.48 0.00
 1 11 1 48.73 0.00
 1 11 3 7.56 0.00
 1 11 5 32.99 0.00
 1 11 7 -6.46 0.00
 1 11 9 54.32 0.00
 1 11 11 -65.83 0.00
 1 11 13 -10.38 0.00
 1 11 15 14.73 0.00
 1 11 17 17.90 0.00
 1 11 19 -2.56 0.00
 1 11 21 -7.84 0.00
 1 11 23 -21.40 0.00
 1 11 25 7.71 0.00
 1 11 27 5.77 0.00
 1 11 29 -5.00 0.00
 1 11 31 4.56 0.00
 1 11 33 0.92 0.00
 1 11 35 2.89 0.00
 1 11 37 -2.56 0.00
 1 11 39 -3.69 0.00
 1 11 41 -1.59 0.00
 1 11 43 7.61 0.00
 1 11 45 -1.10 0.00
 1 13 1 -21.77 0.00
 1 13 3 -12.25 0.00
 1 13 5 -19.39 0.00
 1 13 7 -21.54 0.00
 1 13 9 53.98 0.00
 1 13 11 0.55 0.00
 1 13 13 44.84 0.00
 1 13 15 -12.83 0.00
 1 13 17 1.54 0.00
 1 13 19 -6.38 0.00
 1 13 21 7.49 0.00
 1 13 23 -4.27 0.00
 1 13 25 -3.85 0.00
 1 13 27 -4.22 0.00
 1 13 29 6.74 0.00
 1 13 31 -0.90 0.00
 1 13 33 -2.01 0.00
 1 13 35 2.83 0.00
 1 13 37 -2.40 0.00
 1 13 39 1.56 0.00
 1 13 41 5.02 0.00
 1 13 43 6.17 0.00
 1 15 1 4.39 0.00
 1 15 3 42.35 0.00
 1 15 5 -7.56 0.00
 1 15 7 -6.96 0.00
 1 15 9 38.54 0.00
 1 15 11 -3.17 0.00
 1 15 13 -19.48 0.00
 1 15 15 -11.52 0.00
 1 15 17 18.68 0.00
 1 15 19 -9.24 0.00
 1 15 21 -1.35 0.00
 1 15 23 2.62 0.00
 1 15 25 -2.89 0.00
 1 15 27 4.13 0.00
 1 15 29 6.06 0.00
 1 15 31 -6.33 0.00
 1 15 33 0.84 0.00
 1 15 35 0.62 0.00
 1 15 37 2.92 0.00
 1 15 39 -1.79 0.00
 1 15 41 7.95 0.00
 1 17 1 -23.69 0.00
 1 17 3 -6.28 0.00
 1 17 5 -1.27 0.00
 1 17 7 4.37 0.00
 1 17 9 -2.86 0.00
 1 17 11 6.92 0.00
 1 17 13 -9.25 0.00
 1 17 15 15.28 0.00
 1 17 17 -6.09 0.00
 1 17 19 -8.75 0.00
 1 17 21 5.87 0.00
 1 17 23 2.49 0.00
 1 17 25 -17.06 0.00
 1 17 27 -1.27 0.00
 1 17 29 1.13 0.00
 1 17 31 -3.87 0.00
 1 17 33 2.26 0.00
 1 17 35 2.27 0.00
 1 17 37 -4.58 0.00
 1 17 39 -6.68 0.00
 1 19 1 26.86 0.00
 1 19 3 -3.00 0.00
 1 19 5 -0.43 0.00
 1 19 7 -17.60 0.00
 1 19 9 -5.75 0.00
 1 19 11 18.12 0.00
 1 19 13 -21.35 0.00
 1 19 15 15.77 0.00
 1 19 17 -3.64 0.00
 1 19 19 9.18 0.00
 1 19 21 4.63 0.00
 1 19 23 -2.33 0.00
 1 19 25 -12.11 0.00
 1 19 27 -2.06 0.00
 1 19 29 13.86 0.00
 1 19 31 -1.54 0.00
 1 19 33 -3.92 0.00
 1 19 35 -3.00 0.00
 1 19 37 -4.39 0.00
 1 21 1 -10.84 0.00
 1 21 3 -12.89 0.00
 1 21 5 13.34 0.00
 1 21 7 -15.18 0.00
 1 21 9 0.60 0.00
 1 21 11 5.02 0.00
 1 21 13 -4.32 0.00
 1 21 15 22.55 0.00
 1 21 17 -7.33 0.00
 1 21 19 -4.98 0.00
 1 21 21 0.06 0.00
 1 21 23 4.68 0.00
 1 21 25 3.42 0.00
 1 21 27 -1.64 0.00
 1 21 29 5.00 0.00
 1 21 31 -4.71 0.00
 1 21 33 -1.12 0.00
 1 21 35 3.13 0.00
 1 23 1 -2.53 0.00
 1 23 3 -2.61 0.00
 1 23 5 5.32 0.00
 1 23 7 6.95 0.00
 1 23 9 13.79 0.00
 1 23 11 3.32 0.00
 1 23 13 -0.80 0.00
 1 23 15 -4.43 0.00
 1 23 17 -9.74 0.00
 1 23 19 -8.87 0.00
 1 23 21 3.00 0.00
 1 23 23 2.14 0.00
 1 23 25 -4.38 0.00
 1 23 27 -8.52 0.00
 1 23 29 2.53 0.00
 1 23 31 -1.17 0.00
 1 23 33 -4.91 0.00
 1 25 1 -2.69 0.00
 1 25 3 5.21 0.00
 1 25 5 -11.10 0.00
 1 25 7 -7.56 0.00
 1 25 9 1.35 0.00
 1 25 11 -7.98 0.00
 1 25 13 -9.99 0.00
 1 25 15 -9.18 0.00
 1 25 17 9.24 0.00
 1 25 19 -2.99 0.00
 1 25 21 0.63 0.00
 1 25 23 -1.24 0.00
 1 25 25 -10.15 0.00
 1 25 27 9.48 0.00
 1 25 29 7.93 0.00
 1 25 31 -7.20 0.00
 1 27 1 -2.38 0.00
 1 27 3 2.65 0.00
 1 27 5 -1.01 0.00
 1 27 7 -5.36 0.00
 1 27 9 2.82 0.00
 1 27 11 -2.90 0.00
 1 27 13 0.20 0.00
 1 27 15 -2.54 0.00
 1 27 17 6.90 0.00
 1 27 19 -4.23 0.00
 1 27 21 1.95 0.00
 1 27 23 9.41 0.00
 1 27 25 10.92 0.00
 1 27 27 15.97 0.00
 1 29 1 3.12 0.00
 1 29 3 -1.85 0.00
 1 29 5 -0.50 0.00
 1 29 7 4.86 0.00
 1 29 9 3.95 0.00
 1 29 11 -3.12 0.00
 1 29 13 -1.30 0.00
 1 29 15 -5.93 0.00
 1 29 17 -3.78 0.00
 1 29 19 -1.77 0.00
 1 29 21 4.14 0.00
 1 31 1 -5.39 0.00
 1 31 3 -0.16 0.00
 1 31 5 14.42 0.00
 1 31 7 2.63 0.00
 1 31 9 4.15 0.00
 1 31 11 -1.56 0.00
 1 31 13 0.17 0.00
 1 31 15 -1.94 0.00
 1 31 17 -6.37 0.00
 1 33 3 -4.50 0.00
 1 33 5 5.36 0.00
 1 33 7 -17.09 0.00
 2 0 0 499.76 0.00
 2 0 2 -54.79 0.00
 2 0 4 -319.37 0.00
 2 0 6 139.07 0.00
 2 0 8 63.72 0.00
 2 0 10 96.35 0.00
 2 0 12 -27.01 0.00
 2 0 14 20.39 0.00
 2 0 16 -56.51 0.00
 2 0 18 -14.97 0.00
 2 0 20 13.67 0.00
 2 0 22 -18.10 0.00
 2 0 24 -1.42 0.00
 2 0 26 11.09 0.00
 2 0 28 -10.37 0.00
 2 0 30 3.53 0.00
 2 0 32 11.00 0.00
 2 0 34 -12.96 0.00
 2 0 36 3.99 0.00
 2 0 38 1.01 0.00
 2 0 40 -2.14 0.00
 2 0 42 -4.90 0.00
 2 0 44 7.44 0.00
 2 0 46 -9.50 0.00
 2 2 0 -126.02 0.00
 2 2 2 6.86 0.00
 2 2 4 131.68 0.00
 2 2 6 178.22 0.00
 2 2 8 -12.82 0.00
 2 2 10 -20.39 0.00
 2 2 12 0.15 0.00
 2 2 14 15.47 0.00
 2 2 16 -43.36 0.00
 2 2 18 -19.11 0.00
 2 2 20 -10.40 0.00
 2 2 22 -9.85 0.00
 2 2 24 6.63 0.00
 2 2 26 8.95 0.00
 2 2 28 -8.88 0.00
 2 2 30 -4.86 0.00
 2 2 32 6.14 0.00
 2 2 34 -12.47 0.00
 2 2 36 2.52 0.00
 2 2 38 3.82 0.00
 2 2 40 -2.24 0.00
 2 2 42 -4.70 0.00
 2 2 44 10.03 0.00
 2 2 46 -4.08 0.00
 2 4 0 -342.51 0.00
 2 4 2 24.34 0.00
 2 4 4 80.83 0.00
 2 4 6 -25.92 0.00
 2 4 8 160.13 0.00
 2 4 10 39.92 0.00
 2 4 12 87.19 0.00
 2 4 14 5.82 0.00
 2 4 16 7.82 0.00
 2 4 18 57.55 0.00
 2 4 20 4.02 0.00
 2 4 22 -2.41 0.00
 2 4 24 4.19 0.00
 2 4 26 4.30 0.00
 2 4 28 4.13 0.00
 2 4 30 2.78 0.00
 2 4 32 18.23 0.00
 2 4 34 -6.24 0.00
 2 4 36 -13.72 0.00
 2 4 38 -17.62 0.00
 2 4 40 -5.16 0.00
 2 4 42 -4.08 0.00
 2 4 44 4.49 0.00
 2 4 46 -6.77 0.00
 2 6 0 9.62 0.00
 2 6 2 116.89 0.00
 2 6 4 21.91 0.00
 2 6 6 -153.27 0.00
 2 6 8 13.97 0.00
 2 6 10 -167.43 0.00
 2 6 12 8.33 0.00
 2 6 14 -25.44 0.00
 2 6 16 -24.51 0.00
 2 6 18 37.63 0.00
 2 6 20 15.13 0.00
 2 6 22 0.67 0.00
 2 6 24 1.81 0.00
 2 6 26 -10.05 0.00
 2 6 28 -5.24 0.00
 2 6 30 -6.98 0.00
 2 6 32 -4.02 0.00
 2 6 34 3.25 0.00
 2 6 36 1.85 0.00
 2 6 38 -9.53 0.00
 2 6 40 2.37 0.00
 2 6 42 -1.24 0.00
 2 6 44 5.18 0.00
 2 6 46 -1.25 0.00
 2 8 0 -200.18 0.00
 2 8 2 -55.00 0.00
 2 8 4 40.01 0.00
 2 8 6 -35.35 0.00
 2 8 8 117.98 0.00
 2 8 10 -12.64 0.00
 2 8 12 41.81 0.00
 2 8 14 9.04 0.00
 2 8 16 15.23 0.00
 2 8 18 14.33 0.00
 2 8 20 2.35 0.00
 2 8 22 -3.71 0.00
 2 8 24 14.21 0.00
 2 8 26 -7.09 0.00
 2 8 28 -1.31 0.00
 2 8 30 4.51 0.00
 2 8 32 -7.80 0.00
 2 8 34 7.60 0.00
 2 8 36 1.29 0.00
 2 8 38 1.62 0.00
 2 8 40 -0.06 0.00
 2 8 42 -4.24 0.00
 2 8 44 0.52 0.00
 2 8 46 1.06 0.00
 2 10 0 -40.37 0.00
 2 10 2 33.12 0.00
 2 10 4 6.21 0.00
 2 10 6 -22.34 0.00
 2 10 8 52.96 0.00
 2 10 10 -26.90 0.00
 2 10 12 -36.83 0.00
 2 10 14 -23.33 0.00
 2 10 16 -12.38 0.00
 2 10 18 10.49 0.00
 2 10 20 13.45 0.00
 2 10 22 11.72 0.00
 2 10 24 13.30 0.00
 2 10 26 -5.60 0.00
 2 10 28 1.53 0.00
 2 10 30 6.09 0.00
 2 10 32 7.07 0.00
 2 10 34 5.66 0.00
 2 10 36 -11.59 0.00
 2 10 38 -7.79 0.00
 2 10 40 -7.00 0.00
 2 10 42 5.07 0.00
 2 10 44 5.04 0.00
 2 12 0 -78.77 0.00
 2 12 2 -17.58 0.00
 2 12 4 -32.30 0.00
 2 12 6 13.89 0.00
 2 12 8 -33.20 0.00
 2 12 10 -37.21 0.00
 2 12 12 3.64 0.00
 2 12 14 36.99 0.00
 2 12 16 1.69 0.00
 2 12 18 6.68 0.00
 2 12 20 -9.29 0.00
 2 12 22 -4.30 0.00
 2 12 24 -0.48 0.00
 2 12 26 -6.82 0.00
 2 12 28 -3.69 0.00
 2 12 30 -0.04 0.00
 2 12 32 2.73 0.00
 2 12 34 6.64 0.00
 2 12 36 -0.53 0.00
 2 12 38 7.68 0.00
 2 12 40 -0.02 0.00
 2 12 42 1.22 0.00
 2 12 44 0.07 0.00
 2 14 0 -26.73 0.00
 2 14 2 40.82 0.00
 2 14 4 4.51 0.00
 2 14 6 10.45 0.00
 2 14 8 -13.21 0.00
 2 14 10 24.99 0.00
 2 14 12 -0.66 0.00
 2 14 14 -9.55 0.00
 2 14 16 -2.61 0.00
 2 14 18 20.05 0.00
 2 14 20 1.64 0.00
 2 14 22 -1.95 0.00
 2 14 24 2.48 0.00
 2 14 26 6.92 0.00
 2 14 28 -2.73 0.00
 2 14 30 -2.08 0.00
 2 14 32 -4.19 0.00
 2 14 34 -0.02 0.00
 2 14 36 -9.69 0.00
 2 14 38 4.00 0.00
 2 14 40 0.06 0.00
 2 14 42 -2.83 0.00
 2 16 0 -54.31 0.00
 2 16 2 -7.15 0.00
 2 16 4 -15.09 0.00
 2 16 6 4.03 0.00
 2 16 8 23.02 0.00
 2 16 10 9.88 0.00
 2 16 12 -17.50 0.00
 2 16 14 -0.76 0.00
 2 16 16 -8.20 0.00
 2 16 18 -13.35 0.00
 2 16 20 -5.58 0.00
 2 16 22 12.05 0.00
 2 16 24 1.16 0.00
 2 16 26 5.37 0.00
 2 16 28 6.42 0.00
 2 16 30 5.79 0.00
 2 16 32 -1.05 0.00
 2 16 34 -0.56 0.00
 2 16 36 1.56 0.00
 2 16 38 -0.47 0.00
 2 16 40 0.22 0.00
 2 18 0 4.24 0.00
 2 18 2 26.76 0.00
 2 18 4 22.42 0.00
 2 18 6 3.23 0.00
 2 18 8 3.21 0.00
 2 18 10 -18.30 0.00
 2 18 12 -15.52 0.00
 2 18 14 0.79 0.00
 2 18 16 -0.25 0.00
 2 18 18 4.29 0.00
 2 18 20 6.31 0.00
 2 18 22 -2.15 0.00
 2 18 24 -8.85 0.00
 2 18 26 -5.48 0.00
 2 18 28 1.38 0.00
 2 18 30 -3.10 0.00
 2 18 32 -5.03 0.00
 2 18 34 0.43 0.00
 2 18 36 -0.54 0.00
 2 18 38 -6.93 0.00
 2 20 0 3.07 0.00
 2 20 2 10.36 0.00
 2 20 4 1.40 0.00
 2 20 6 -26.17 0.00
 2 20 8 -0.77 0.00
 2 20 10 5.12 0.00
 2 20 12 -3.42 0.00
 2 20 14 -0.33 0.00
 2 20 16 11.20 0.00
 2 20 18 3.30 0.00
 2 20 20 -2.69 0.00
 2 20 22 -1.89 0.00
 2 20 24 9.45 0.00
 2 20 26 1.04 0.00
 2 20 28 6.60 0.00
 2 20 30 -4.22 0.00
 2 20 32 -1.62 0.00
 2 20 34 3.72 0.00
 2 20 36 2.20 0.00
 2 22 0 -14.44 0.00
 2 22 2 -2.64 0.00
 2 22 4 7.45 0.00
 2 22 6 3.09 0.00
 2 22 8 13.21 0.00
 2 22 10 -1.34 0.00
 2 22 12 -5.95 0.00
 2 22 14 -4.63 0.00
 2 22 16 1.12 0.00
 2 22 18 -8.78 0.00
 2 22 20 -0.82 0.00
 2 22 22 1.21 0.00
 2 22 24 5.88 0.00
 2 22 26 2.26 0.00
 2 22 28 3.06 0.00
 2 22 30 -3.39 0.00
 2 22 32 -7.74 0.00
 2 22 34 0.19 0.00
 2 24 0 -0.38 0.00
 2 24 2 10.23 0.00
 2 24 4 7.44 0.00
 2 24 6 2.30 0.00
 2 24 8 3.39 0.00
 2 24 10 -2.46 0.00
 2 24 12 11.44 0.00
 2 24 14 7.85 0.00
 2 24 16 5.32 0.00
 2 24 18 -5.01 0.00
 2 24 20 3.10 0.00
 2 24 22 1.27 0.00
 2 24 24 -4.92 0.00
 2 24 26 -5.33 0.00
 2 24 28 2.42 0.00
 2 24 30 15.98 0.00
 2 24 32 -4.27 0.00
 2 26 0 -6.26 0.00
 2 26 2 -1.45 0.00
 2 26 4 5.63 0.00
 2 26 6 -4.73 0.00
 2 26 8 -7.04 0.00
 2 26 10 -3.39 0.00
 2 26 12 1.55 0.00
 2 26 14 3.99 0.00
 2 26 16 1.75 0.00
 2 26 18 0.05 0.00
 2 26 20 -5.34 0.00
 2 26 22 -4.68 0.00
 2 26 24 4.81 0.00
 2 26 26 6.26 0.00
 2 26 28 8.59 0.00
 2 28 0 2.51 0.00
 2 28 2 0.74 0.00
 2 28 4 3.64 0.00
 2 28 6 -0.08 0.00
 2 28 8 -0.58 0.00
 2 28 10 -0.24 0.00
 2 28 12 2.68 0.00
 2 28 14 5.11 0.00
 2 28 16 -2.72 0.00
 2 28 18 -5.35 0.00
 2 28 20 -1.42 0.00
 2 28 22 0.01 0.00
 2 28 24 15.48 0.00
 2 30 0 -1.55 0.00
 2 30 2 1.43 0.00
 2 30 4 -5.29 0.00
 2 30 6 -1.54 0.00
 2 30 8 6.13 0.00
 2 30 10 1.28 0.00
 2 30 12 1.99 0.00
 2 30 14 1.35 0.00
 2 30 16 -1.10 0.00
 2 30 18 -3.51 0.00
 2 30 20 6.24 0.00
 2 32 0 -2.51 0.00
 2 32 2 -2.05 0.00
 2 32 4 -2.51 0.00
 2 32 6 -0.77 0.00
 2 32 8 3.15 0.00
 2 32 10 -1.30 0.00
 2 32 12 -9.48 0.00
 3 1 1 253.54 0.00
 3 1 3 -0.09 0.00
 3 1 5 -62.45 0.00
 3 1 7 34.96 0.00
 3 1 9 -293.76 0.00
 3 1 11 -24.48 0.00
 3 1 13 -74.19 0.00
 3 1 15 2.17 0.00
 3 1 17 14.44 0.00
 3 1 19 104.68 0.00
 3 1 21 -35.80 0.00
 3 1 23 30.53 0.00
 3 1 25 7.93 0.00
 3 1 27 2.09 0.00
 3 1 29 -12.76 0.00
 3 1 31 9.69 0.00
 3 1 33 -21.10 0.00
 3 1 35 0.20 0.00
 3 1 37 3.35 0.00
 3 1 39 -1.08 0.00
 3 1 41 -2.26 0.00
 3 1 43 3.70 0.00
 3 1 45 0.28 0.00
 3 1 47 -4.19 0.00
 3 3 1 -37.54 0.00
 3 3 3 -61.65 0.00
 3 3 5 -107.88 0.00
 3 3 7 134.10 0.00
 3 3 9 -4.99 0.00
 3 3 11 77.25 0.00
 3 3 13 1.66 0.00
 3 3 15 -100.59 0.00
 3 3 17 -10.34 0.00
 3 3 19 22.87 0.00
 3 3 21 -21.36 0.00
 3 3 23 27.96 0.00
 3 3 25 -1.86 0.00
 3 3 27 -5.92 0.00
 3 3 29 -1.67 0.00
 3 3 31 9.02 0.00
 3 3 33 4.34 0.00
 3 3 35 -0.46 0.00
 3 3 37 6.50 0.00
 3 3 39 4.17 0.00
 3 3 41 -5.83 0.00
 3 3 43 3.25 0.00
 3 3 45 3.43 0.00
 3 3 47 1.45 0.00
 3 5 1 53.99 0.00
 3 5 3 -127.84 0.00
 3 5 5 -62.93 0.00
 3 5 7 90.65 0.00
 3 5 9 -99.93 0.00
 3 5 11 -121.18 0.00
 3 5 13 72.76 0.00
 3 5 15 -68.40 0.00
 3 5 17 44.42 0.00
 3 5 19 -27.51 0.00
 3 5 21 -20.71 0.00
 3 5 23 -4.24 0.00
 3 5 25 -6.11 0.00
 3 5 27 0.42 0.00
 3 5 29 19.09 0.00
 3 5 31 1.38 0.00
 3 5 33 3.94 0.00
 3 5 35 -1.71 0.00
 3 5 37 9.11 0.00
 3 5 39 11.11 0.00
 3 5 41 -6.74 0.00
 3 5 43 0.27 0.00
 3 5 45 0.77 0.00
 3 5 47 -0.47 0.00
 3 7 1 35.53 0.00
 3 7 3 -70.86 0.00
 3 7 5 83.63 0.00
 3 7 7 76.30 0.00
 3 7 9 23.25 0.00
 3 7 11 22.60 0.00
 3 7 13 157.54 0.00
 3 7 15 -73.78 0.00
 3 7 17 19.82 0.00
 3 7 19 -40.97 0.00
 3 7 21 -14.44 0.00
 3 7 23 -23.81 0.00
 3 7 25 -1.98 0.00
 3 7 27 -17.37 0.00
 3 7 29 7.58 0.00
 3 7 31 -0.93 0.00
 3 7 33 3.74 0.00
 3 7 35 -0.06 0.00
 3 7 37 -0.58 0.00
 3 7 39 6.43 0.00
 3 7 41 -9.47 0.00
 3 7 43 6.27 0.00
 3 7 45 2.21 0.00
 3 9 1 -23.44 0.00
 3 9 3 -22.28 0.00
 3 9 5 8.84 0.00
 3 9 7 -31.91 0.00
 3 9 9 -1.41 0.00
 3 9 11 -20.80 0.00
 3 9 13 51.64 0.00
 3 9 15 -60.35 0.00
 3 9 17 21.27 0.00
 3 9 19 -3.35 0.00
 3 9 21 -9.84 0.00
 3 9 23 -8.30 0.00
 3 9 25 10.27 0.00
 3 9 27 2.61 0.00
 3 9 29 9.36 0.00
 3 9 31 -0.73 0.00
 3 9 33 -7.83 0.00
 3 9 35 -5.75 0.00
 3 9 37 0.69 0.00
 3 9 39 9.55 0.00
 3 9 41 -8.19 0.00
 3 9 43 0.76 0.00
 3 9 45 -1.34 0.00
 3 11 1 7.65 0.00
 3 11 3 -14.62 0.00
 3 11 5 -16.07 0.00
 3 11 7 54.56 0.00
 3 11 9 12.44 0.00
 3 11 11 -17.88 0.00
 3 11 13 38.93 0.00
 3 11 15 -7.06 0.00
 3 11 17 -9.66 0.00
 3 11 19 13.96 0.00
 3 11 21 -9.48 0.00
 3 11 23 14.46 0.00
 3 11 25 -16.92 0.00
 3 11 27 -3.16 0.00
 3 11 29 0.87 0.00
 3 11 31 1.75 0.00
 3 11 33 -6.44 0.00
 3 11 35 2.25 0.00
 3 11 37 -1.86 0.00
 3 11 39 -1.93 0.00
 3 11 41 -1.28 0.00
 3 11 43 0.87 0.00
 3 13 1 69.43 0.00
 3 13 3 60.86 0.00
 3 13 5 -7.98 0.00
 3 13 7 5.15 0.00
 3 13 9 -67.87 0.00
 3 13 11 -7.56 0.00
 3 13 13 16.74 0.00
 3 13 15 0.03 0.00
 3 13 17 -11.81 0.00
 3 13 19 32.36 0.00
 3 13 21 -18.27 0.00
 3 13 23 13.21 0.00
 3 13 25 -17.50 0.00
 3 13 27 1.20 0.00
 3 13 29 -3.53 0.00
 3 13 31 -8.24 0.00
 3 13 33 -7.08 0.00
 3 13 35 3.63 0.00
 3 13 37 2.03 0.00
 3 13 39 1.61 0.00
 3 13 41 -1.95 0.00
 3 13 43 -3.59 0.00
 3 15 1 -44.79 0.00
 3 15 3 -16.29 0.00
 3 15 5 -33.40 0.00
 3 15 7 12.07 0.00
 3 15 9 -1.91 0.00
 3 15 11 20.58 0.00
 3 15 13 -19.65 0.00
 3 15 15 -11.02 0.00
 3 15 17 -8.71 0.00
 3 15 19 1.43 0.00
 3 15 21 -22.55 0.00
 3 15 23 23.48 0.00
 3 15 25 2.47 0.00
 3 15 27 9.63 0.00
 3 15 29 4.19 0.00
 3 15 31 -3.67 0.00
 3 15 33 6.61 0.00
 3 15 35 3.10 0.00
 3 15 37 -5.20 0.00
 3 15 39 -5.02 0.00
 3 15 41 -1.36 0.00
 3 17 1 17.83 0.00
 3 17 3 6.43 0.00
 3 17 5 5.09 0.00
 3 17 7 9.41 0.00
 3 17 9 -2.79 0.00
 3 17 11 2.73 0.00
 3 17 13 3.11 0.00
 3 17 15 13.58 0.00
 3 17 17 13.64 0.00
 3 17 19 1.19 0.00
 3 17 21 -0.27 0.00
 3 17 23 8.42 0.00
 3 17 25 -5.38 0.00
 3 17 27 -0.18 0.00
 3 17 29 -0.62 0.00
 3 17 31 -2.73 0.00
 3 17 33 8.15 0.00
 3 17 35 13.47 0.00
 3 17 37 -2.42 0.00
 3 17 39 -1.37 0.00
 3 19 1 -1.61 0.00
 3 19 3 -18.86 0.00
 3 19 5 -5.56 0.00
 3 19 7 -7.90 0.00
 3 19 9 -4.35 0.00
 3 19 11 -3.95 0.00
 3 19 13 -0.50 0.00
 3 19 15 -11.82 0.00
 3 19 17 0.99 0.00
 3 19 19 -8.63 0.00
 3 19 21 2.79 0.00
 3 19 23 -2.38 0.00
 3 19 25 -1.54 0.00
 3 19 27 -4.16 0.00
 3 19 29 0.12 0.00
 3 19 31 6.88 0.00
 3 19 33 -4.86 0.00
 3 19 35 3.60 0.00
 3 19 37 -0.89 0.00
 3 21 1 -5.38 0.00
 3 21 3 -2.19 0.00
 3 21 5 -2.66 0.00
 3 21 7 -3.58 0.00
 3 21 9 5.38 0.00
 3 21 11 3.03 0.00
 3 21 13 11.17 0.00
 3 21 15 -4.18 0.00
 3 21 17 5.84 0.00
 3 21 19 -6.24 0.00
 3 21 21 4.08 0.00
 3 21 23 -0.24 0.00
 3 21 25 4.53 0.00
 3 21 27 4.67 0.00
 3 21 29 4.75 0.00
 3 21 31 11.11 0.00
 3 21 33 -5.55 0.00
 3 21 35 0.73 0.00
 3 23 1 -0.44 0.00
 3 23 3 6.12 0.00
 3 23 5 -8.54 0.00
 3 23 7 7.11 0.00
 3 23 9 3.51 0.00
 3 23 11 1.90 0.00
 3 23 13 3.89 0.00
 3 23 15 -7.71 0.00
 3 23 17 -0.41 0.00
 3 23 19 1.09 0.00
 3 23 21 12.89 0.00
 3 23 23 -2.38 0.00
 3 23 25 -8.66 0.00
 3 23 27 -10.09 0.00
 3 23 29 -6.12 0.00
 3 23 31 -5.78 0.00
 3 23 33 -6.34 0.00
 3 25 1 3.76 0.00
 3 25 3 -1.31 0.00
 3 25 5 -19.39 0.00
 3 25 7 -4.93 0.00
 3 25 9 -10.77 0.00
 3 25 11 -8.67 0.00
 3 25 13 -10.81 0.00
 3 25 15 -3.10 0.00
 3 25 17 1.38 0.00
 3 25 19 -2.98 0.00
 3 25 21 0.12 0.00
 3 25 23 -6.84 0.00
 3 25 25 -5.59 0.00
 3 25 27 3.02 0.00
 3 25 29 3.66 0.00
 3 25 31 -8.91 0.00
 3 27 1 5.36 0.00
 3 27 3 4.51 0.00
 3 27 5 -0.88 0.00
 3 27 7 3.69 0.00
 3 27 9 1.01 0.00
 3 27 11 1.44 0.00
 3 27 13 2.69 0.00
 3 27 15 9.97 0.00
 3 27 17 3.73 0.00
 3 27 19 -3.17 0.00
 3 27 21 2.13 0.00
 3 27 23 3.80 0.00
 3 27 25 9.50 0.00
 3 27 27 13.63 0.00
 3 29 1 -0.97 0.00
 3 29 3 4.53 0.00
 3 29 5 -7.34 0.00
 3 29 7 -1.34 0.00
 3 29 9 -3.09 0.00
 3 29 11 -0.58 0.00
 3 29 13 4.34 0.00
 3 29 15 -0.37 0.00
 3 29 17 -3.84 0.00
 3 29 19 7.00 0.00
 3 29 21 16.47 0.00
 3 31 1 -1.96 0.00
 3 31 3 8.69 0.00
 3 31 5 -6.19 0.00
 3 31 7 3.79 0.00
 3 31 9 8.43 0.00
 3 31 11 5.05 0.00
 3 31 13 5.24 0.00
 3 31 15 -2.04 0.00
 3 33 1 -15.77 0.00
 3 33 3 4.93 0.00
 4 0 0 88.55 0.00
 4 0 2 -111.58 0.00
 4 0 4 -123.64 0.00
 4 0 6 117.78 0.00
 4 0 8 78.85 0.00
 4 0 10 103.25 0.00
 4 0 12 120.00 0.00
 4 0 14 63.90 0.00
 4 0 16 17.11 0.00
 4 0 18 -48.37 0.00
 4 0 20 -2.05 0.00
 4 0 22 -27.97 0.00
 4 0 24 -18.32 0.00
 4 0 26 -2.96 0.00
 4 0 28 2.08 0.00
 4 0 30 13.15 0.00
 4 0 32 16.99 0.00
 4 0 34 -1.36 0.00
 4 0 36 9.64 0.00
 4 0 38 4.88 0.00
 4 0 40 -2.70 0.00
 4 0 42 -6.28 0.00
 4 0 44 -2.75 0.00
 4 0 46 1.88 0.00
 4 2 0 -40.76 0.00
 4 2 2 -30.34 0.00
 4 2 4 20.35 0.00
 4 2 6 -13.97 0.00
 4 2 8 -81.96 0.00
 4 2 10 -25.09 0.00
 4 2 12 70.46 0.00
 4 2 14 47.10 0.00
 4 2 16 31.38 0.00
 4 2 18 -22.99 0.00
 4 2 20 -19.46 0.00
 4 2 22 -26.21 0.00
 4 2 24 -13.65 0.00
 4 2 26 -4.79 0.00
 4 2 28 -6.18 0.00
 4 2 30 -4.18 0.00
 4 2 32 8.26 0.00
 4 2 34 -8.38 0.00
 4 2 36 4.88 0.00
 4 2 38 7.32 0.00
 4 2 40 -0.27 0.00
 4 2 42 -5.46 0.00
 4 2 44 2.61 0.00
 4 2 46 0.95 0.00
 4 4 0 33.18 0.00
 4 4 2 90.94 0.00
 4 4 4 104.62 0.00
 4 4 6 -55.54 0.00
 4 4 8 -19.66 0.00
 4 4 10 -26.96 0.00
 4 4 12 19.41 0.00
 4 4 14 -14.17 0.00
 4 4 16 5.86 0.00
 4 4 18 12.51 0.00
 4 4 20 -14.40 0.00
 4 4 22 4.32 0.00
 4 4 24 1.36 0.00
 4 4 26 0.77 0.00
 4 4 28 -3.86 0.00
 4 4 30 -12.71 0.00
 4 4 32 6.39 0.00
 4 4 34 -0.42 0.00
 4 4 36 -2.95 0.00
 4 4 38 -7.35 0.00
 4 4 40 2.40 0.00
 4 4 42 0.33 0.00
 4 4 44 7.19 0.00
 4 4 46 -3.75 0.00
 4 6 0 120.42 0.00
 4 6 2 39.36 0.00
 4 6 4 -17.22 0.00
 4 6 6 -75.08 0.00
 4 6 8 15.92 0.00
 4 6 10 33.71 0.00
 4 6 12 48.77 0.00
 4 6 14 18.72 0.00
 4 6 16 5.79 0.00
 4 6 18 13.34 0.00
 4 6 20 -13.74 0.00
 4 6 22 5.24 0.00
 4 6 24 -1.95 0.00
 4 6 26 8.30 0.00
 4 6 28 3.82 0.00
 4 6 30 -2.48 0.00
 4 6 32 -7.88 0.00
 4 6 34 4.69 0.00
 4 6 36 8.04 0.00
 4 6 38 0.26 0.00
 4 6 40 2.66 0.00
 4 6 42 -11.11 0.00
 4 6 44 -2.62 0.00
 4 6 46 -3.60 0.00
 4 8 0 60.76 0.00
 4 8 2 54.35 0.00
 4 8 4 33.85 0.00
 4 8 6 -33.94 0.00
 4 8 8 -68.67 0.00
 4 8 10 -52.38 0.00
 4 8 12 -77.28 0.00
 4 8 14 -39.10 0.00
 4 8 16 -0.46 0.00
 4 8 18 14.48 0.00
 4 8 20 8.69 0.00
 4 8 22 17.48 0.00
 4 8 24 12.15 0.00
 4 8 26 13.90 0.00
 4 8 28 -3.18 0.00
 4 8 30 -1.27 0.00
 4 8 32 -14.18 0.00
 4 8 34 0.80 0.00
 4 8 36 -2.04 0.00
 4 8 38 1.40 0.00
 4 8 40 2.07 0.00
 4 8 42 1.04 0.00
 4 8 44 12.14 0.00
 4 10 0 -19.20 0.00
 4 10 2 10.08 0.00
 4 10 4 -47.22 0.00
 4 10 6 -9.15 0.00
 4 10 8 21.90 0.00
 4 10 10 56.69 0.00
 4 10 12 -8.61 0.00
 4 10 14 4.74 0.00
 4 10 16 9.37 0.00
 4 10 18 -12.12 0.00
 4 10 20 -12.32 0.00
 4 10 22 -3.69 0.00
 4 10 24 0.29 0.00
 4 10 26 1.07 0.00
 4 10 28 3.35 0.00
 4 10 30 6.86 0.00
 4 10 32 1.55 0.00
 4 10 34 5.60 0.00
 4 10 36 -2.32 0.00
 4 10 38 -0.27 0.00
 4 10 40 1.34 0.00
 4 10 42 -0.67 0.00
 4 10 44 1.90 0.00
 4 12 0 -18.84 0.00
 4 12 2 37.84 0.00
 4 12 4 -21.42 0.00
 4 12 6 14.15 0.00
 4 12 8 -14.26 0.00
 4 12 10 -3.40 0.00
 4 12 12 -11.36 0.00
 4 12 14 7.12 0.00
 4 12 16 4.43 0.00
 4 12 18 -4.49 0.00
 4 12 20 -0.18 0.00
 4 12 22 -10.33 0.00
 4 12 24 -3.34 0.00
 4 12 26 -1.48 0.00
 4 12 28 1.65 0.00
 4 12 30 -0.27 0.00
 4 12 32 3.30 0.00
 4 12 34 2.85 0.00
 4 12 36 7.00 0.00
 4 12 38 -0.39 0.00
 4 12 40 3.67 0.00
 4 12 42 1.44 0.00
 4 14 0 -53.94 0.00
 4 14 2 14.60 0.00
 4 14 4 -22.46 0.00
 4 14 6 -17.54 0.00
 4 14 8 -5.47 0.00
 4 14 10 17.63 0.00
 4 14 12 11.09 0.00
 4 14 14 4.99 0.00
 4 14 16 -1.11 0.00
 4 14 18 1.83 0.00
 4 14 20 -6.92 0.00
 4 14 22 -11.32 0.00
 4 14 24 4.62 0.00
 4 14 26 3.97 0.00
 4 14 28 -0.07 0.00
 4 14 30 -1.11 0.00
 4 14 32 4.47 0.00
 4 14 34 -2.79 0.00
 4 14 36 1.51 0.00
 4 14 38 2.78 0.00
 4 14 40 -0.25 0.00
 4 14 42 -8.06 0.00
 4 16 0 -22.02 0.00
 4 16 2 14.46 0.00
 4 16 4 10.39 0.00
 4 16 6 -0.96 0.00
 4 16 8 22.71 0.00
 4 16 10 -1.38 0.00
 4 16 12 -7.66 0.00
 4 16 14 10.55 0.00
 4 16 16 -4.87 0.00
 4 16 18 -3.47 0.00
 4 16 20 -2.24 0.00
 4 16 22 10.01 0.00
 4 16 24 -2.66 0.00
 4 16 26 -7.26 0.00
 4 16 28 2.57 0.00
 4 16 30 -2.94 0.00
 4 16 32 -10.30 0.00
 4 16 34 -8.82 0.00
 4 16 36 -7.98 0.00
 4 16 38 -5.85 0.00
 4 16 40 -5.11 0.00
 4 18 0 -0.68 0.00
 4 18 2 -2.73 0.00
 4 18 4 15.53 0.00
 4 18 6 -6.18 0.00
 4 18 8 1.37 0.00
 4 18 10 -8.79 0.00
 4 18 12 8.55 0.00
 4 18 14 19.29 0.00
 4 18 16 -1.27 0.00
 4 18 18 -0.26 0.00
 4 18 20 -2.10 0.00
 4 18 22 8.59 0.00
 4 18 24 -9.52 0.00
 4 18 26 -9.67 0.00
 4 18 28 -4.21 0.00
 4 18 30 -3.11 0.00
 4 18 32 -6.10 0.00
 4 18 34 -2.65 0.00
 4 18 36 -4.00 0.00
 4 18 38 -1.02 0.00
 4 20 0 16.05 0.00
 4 20 2 -3.65 0.00
 4 20 4 7.26 0.00
 4 20 6 -13.90 0.00
 4 20 8 -9.57 0.00
 4 20 10 3.35 0.00
 4 20 12 3.02 0.00
 4 20 14 -1.87 0.00
 4 20 16 -1.86 0.00
 4 20 18 1.58 0.00
 4 20 20 -11.77 0.00
 4 20 22 0.41 0.00
 4 20 24 -4.57 0.00
 4 20 26 3.25 0.00
 4 20 28 7.19 0.00
 4 20 30 -2.17 0.00
 4 20 32 -5.09 0.00
 4 20 34 -2.60 0.00
 4 20 36 -1.97 0.00
 4 22 0 -0.71 0.00
 4 22 2 -3.37 0.00
 4 22 4 4.22 0.00
 4 22 6 2.63 0.00
 4 22 8 -0.59 0.00
 4 22 10 2.49 0.00
 4 22 12 -0.98 0.00
 4 22 14 0.35 0.00
 4 22 16 -0.64 0.00
 4 22 18 -3.66 0.00
 4 22 20 -3.26 0.00
 4 22 22 7.87 0.00
 4 22 24 2.08 0.00
 4 22 26 1.52 0.00
 4 22 28 5.80 0.00
 4 22 30 -1.32 0.00
 4 22 32 -1.40 0.00
 4 22 34 3.19 0.00
 4 24 0 -9.14 0.00
 4 24 2 2.36 0.00
 4 24 4 -0.59 0.00
 4 24 6 11.12 0.00
 4 24 8 6.45 0.00
 4 24 10 4.55 0.00
 4 24 12 2.89 0.00
 4 24 14 -2.23 0.00
 4 24 16 -0.03 0.00
 4 24 18 1.81 0.00
 4 24 20 4.58 0.00
 4 24 22 -3.08 0.00
 4 24 24 -3.72 0.00
 4 24 26 -7.71 0.00
 4 24 28 -0.48 0.00
 4 24 30 1.60 0.00
 4 24 32 -1.51 0.00
 4 26 0 -1.23 0.00
 4 26 2 5.65 0.00
 4 26 4 -6.03 0.00
 4 26 6 -1.49 0.00
 4 26 8 -1.75 0.00
 4 26 10 -2.33 0.00
 4 26 12 -2.91 0.00
 4 26 14 -3.85 0.00
 4 26 16 -1.57 0.00
 4 26 18 3.59 0.00
 4 26 20 -2.85 0.00
 4 26 22 -2.79 0.00
 4 26 24 7.42 0.00
 4 26 26 -6.73 0.00
 4 26 28 -0.12 0.00
 4 28 0 -2.68 0.00
 4 28 2 3.77 0.00
 4 28 4 -0.67 0.00
 4 28 6 1.19 0.00
 4 28 8 7.35 0.00
 4 28 10 0.05 0.00
 4 28 12 -0.86 0.00
 4 28 14 1.84 0.00
 4 28 16 -2.10 0.00
 4 28 18 3.98 0.00
 4 28 20 -1.07 0.00
 4 28 22 11.04 0.00
 4 28 24 19.22 0.00
 4 30 0 -2.27 0.00
 4 30 2 -3.25 0.00
 4 30 4 -10.09 0.00
 4 30 6 -1.79 0.00
 4 30 8 2.74 0.00
 4 30 10 -9.83 0.00
 4 30 12 -7.26 0.00
 4 30 14 1.94 0.00
 4 30 16 -0.74 0.00
 4 30 18 3.10 0.00
 4 32 0 13.86 0.00
 4 32 2 7.53 0.00
 4 32 4 -2.99 0.00
 4 32 6 7.33 0.00
 4 32 8 16.89 0.00
 4 32 10 13.08 0.00
 5 1 1 9.71 0.00
 5 1 3 -60.66 0.00
 5 1 5 29.73 0.00
 5 1 7 -33.29 0.00
 5 1 9 -5.52 0.00
 5 1 11 13.63 0.00
 5 1 13 -53.85 0.00
 5 1 15 -17.19 0.00
 5 1 17 -29.44 0.00
 5 1 19 11.63 0.00
 5 1 21 11.90 0.00
 5 1 23 -11.55 0.00
 5 1 25 31.73 0.00
 5 1 27 4.86 0.00
 5 1 29 -5.64 0.00
 5 1 31 0.89 0.00
 5 1 33 -5.01 0.00
 5 1 35 -4.72 0.00
 5 1 37 6.57 0.00
 5 1 39 -3.97 0.00
 5 1 41 0.65 0.00
 5 1 43 -2.20 0.00
 5 1 45 5.07 0.00
 5 3 1 -68.34 0.00
 5 3 3 -26.66 0.00
 5 3 5 16.09 0.00
 5 3 7 24.77 0.00
 5 3 9 82.19 0.00
 5 3 11 19.92 0.00
 5 3 13 -44.01 0.00
 5 3 15 -33.53 0.00
 5 3 17 -11.29 0.00
 5 3 19 21.28 0.00
 5 3 21 24.64 0.00
 5 3 23 13.32 0.00
 5 3 25 7.71 0.00
 5 3 27 5.29 0.00
 5 3 29 -5.94 0.00
 5 3 31 5.61 0.00
 5 3 33 1.24 0.00
 5 3 35 -15.81 0.00
 5 3 37 -1.96 0.00
 5 3 39 -0.33 0.00
 5 3 41 2.76 0.00
 5 3 43 2.68 0.00
 5 3 45 9.13 0.00
 5 5 1 -42.74 0.00
 5 5 3 -43.09 0.00
 5 5 5 -19.04 0.00
 5 5 7 10.28 0.00
 5 5 9 0.04 0.00
 5 5 11 -52.95 0.00
 5 5 13 -8.65 0.00
 5 5 15 10.23 0.00
 5 5 17 2.50 0.00
 5 5 19 5.36 0.00
 5 5 21 0.32 0.00
 5 5 23 7.70 0.00
 5 5 25 -7.19 0.00
 5 5 27 13.66 0.00
 5 5 29 -5.74 0.00
 5 5 31 0.94 0.00
 5 5 33 0.85 0.00
 5 5 35 -5.17 0.00
 5 5 37 1.75 0.00
 5 5 39 5.69 0.00
 5 5 41 -3.10 0.00
 5 5 43 -4.52 0.00
 5 5 45 5.87 0.00
 5 7 1 14.06 0.00
 5 7 3 22.00 0.00
 5 7 5 14.25 0.00
 5 7 7 -18.55 0.00
 5 7 9 -25.95 0.00
 5 7 11 -16.16 0.00
 5 7 13 20.28 0.00
 5 7 15 10.20 0.00
 5 7 17 -12.08 0.00
 5 7 19 13.92 0.00
 5 7 21 6.94 0.00
 5 7 23 7.48 0.00
 5 7 25 -4.80 0.00
 5 7 27 3.28 0.00
 5 7 29 -11.36 0.00
 5 7 31 10.48 0.00
 5 7 33 -3.98 0.00
 5 7 35 -4.44 0.00
 5 7 37 0.10 0.00
 5 7 39 7.24 0.00
 5 7 41 -2.02 0.00
 5 7 43 -0.58 0.00
 5 7 45 -3.51 0.00
 5 9 1 -97.14 0.00
 5 9 3 -6.71 0.00
 5 9 5 2.83 0.00
 5 9 7 12.26 0.00
 5 9 9 59.40 0.00
 5 9 11 52.13 0.00
 5 9 13 17.99 0.00
 5 9 15 -8.25 0.00
 5 9 17 -20.88 0.00
 5 9 19 5.01 0.00
 5 9 21 -6.45 0.00
 5 9 23 -7.31 0.00
 5 9 25 0.98 0.00
 5 9 27 5.13 0.00
 5 9 29 -12.74 0.00
 5 9 31 6.68 0.00
 5 9 33 0.58 0.00
 5 9 35 2.73 0.00
 5 9 37 -0.98 0.00
 5 9 39 -3.84 0.00
 5 9 41 -3.96 0.00
 5 9 43 5.98 0.00
 5 11 1 19.27 0.00
 5 11 3 27.04 0.00
 5 11 5 11.01 0.00
 5 11 7 14.84 0.00
 5 11 9 -11.96 0.00
 5 11 11 -32.78 0.00
 5 11 13 -6.61 0.00
 5 11 15 16.06 0.00
 5 11 17 -8.92 0.00
 5 11 19 -0.35 0.00
 5 11 21 10.85 0.00
 5 11 23 -2.34 0.00
 5 11 25 -9.55 0.00
 5 11 27 -3.80 0.00
 5 11 29 -7.11 0.00
 5 11 31 5.99 0.00
 5 11 33 0.42 0.00
 5 11 35 0.86 0.00
 5 11 37 -1.89 0.00
 5 11 39 -6.30 0.00
 5 11 41 2.39 0.00
 5 11 43 0.67 0.00
 5 13 1 -3.12 0.00
 5 13 3 -14.83 0.00
 5 13 5 -4.96 0.00
 5 13 7 -5.33 0.00
 5 13 9 1.41 0.00
 5 13 11 18.11 0.00
 5 13 13 6.01 0.00
 5 13 15 7.06 0.00
 5 13 17 -9.46 0.00
 5 13 19 -6.29 0.00
 5 13 21 0.66 0.00
 5 13 23 -6.17 0.00
 5 13 25 6.82 0.00
 5 13 27 12.11 0.00
 5 13 29 0.31 0.00
 5 13 31 5.54 0.00
 5 13 33 -0.57 0.00
 5 13 35 -4.77 0.00
 5 13 37 0.89 0.00
 5 13 39 0.11 0.00
 5 13 41 7.64 0.00
 5 15 1 3.20 0.00
 5 15 3 5.45 0.00
 5 15 5 14.38 0.00
 5 15 7 -8.97 0.00
 5 15 9 5.18 0.00
 5 15 11 8.71 0.00
 5 15 13 -18.34 0.00
 5 15 15 5.65 0.00
 5 15 17 1.91 0.00
 5 15 19 -5.72 0.00
 5 15 21 9.29 0.00
 5 15 23 0.15 0.00
 5 15 25 -0.37 0.00
 5 15 27 -1.38 0.00
 5 15 29 2.57 0.00
 5 15 31 1.09 0.00
 5 15 33 7.93 0.00
 5 15 35 0.36 0.00
 5 15 37 5.84 0.00
 5 15 39 3.58 0.00
 5 15 41 -0.17 0.00
 5 17 1 -1.63 0.00
 5 17 3 0.53 0.00
 5 17 5 5.75 0.00
 5 17 7 3.15 0.00
 5 17 9 10.38 0.00
 5 17 11 2.01 0.00
 5 17 13 -24.62 0.00
 5 17 15 -3.80 0.00
 5 17 17 -2.81 0.00
 5 17 19 -6.39 0.00
 5 17 21 11.16 0.00
 5 17 23 -8.96 0.00
 5 17 25 3.90 0.00
 5 17 27 2.64 0.00
 5 17 29 5.22 0.00
 5 17 31 -0.05 0.00
 5 17 33 12.92 0.00
 5 17 35 5.99 0.00
 5 17 37 -0.96 0.00
 5 17 39 0.29 0.00
 5 19 1 7.01 0.00
 5 19 3 1.51 0.00
 5 19 5 -7.77 0.00
 5 19 7 -3.90 0.00
 5 19 9 -2.31 0.00
 5 19 11 1.35 0.00
 5 19 13 -6.87 0.00
 5 19 15 9.37 0.00
 5 19 17 8.77 0.00
 5 19 19 0.87 0.00
 5 19 21 9.78 0.00
 5 19 23 -8.68 0.00
 5 19 25 -1.14 0.00
 5 19 27 -1.92 0.00
 5 19 29 -2.59 0.00
 5 19 31 1.05 0.00
 5 19 33 7.50 0.00
 5 19 35 6.89 0.00
 5 19 37 1.85 0.00
 5 21 1 -5.60 0.00
 5 21 3 6.54 0.00
 5 21 5 0.21 0.00
 5 21 7 11.17 0.00
 5 21 9 7.41 0.00
 5 21 11 -8.57 0.00
 5 21 13 -12.78 0.00
 5 21 15 2.99 0.00
 5 21 17 4.13 0.00
 5 21 19 -5.32 0.00
 5 21 21 -2.31 0.00
 5 21 23 2.86 0.00
 5 21 25 1.32 0.00
 5 21 27 6.65 0.00
 5 21 29 -2.67 0.00
 5 21 31 2.32 0.00
 5 21 33 4.10 0.00
 5 21 35 -8.62 0.00
 5 23 1 -7.68 0.00
 5 23 3 1.33 0.00
 5 23 5 -5.06 0.00
 5 23 7 5.14 0.00
 5 23 9 8.57 0.00
 5 23 11 1.13 0.00
 5 23 13 -1.21 0.00
 5 23 15 -0.92 0.00
 5 23 17 -1.95 0.00
 5 23 19 1.45 0.00
 5 23 21 7.11 0.00
 5 23 23 7.44 0.00
 5 23 25 -8.82 0.00
 5 23 27 5.05 0.00
 5 23 29 -5.21 0.00
 5 23 31 -0.81 0.00
 5 25 1 -0.80 0.00
 5 25 3 0.76 0.00
 5 25 5 7.10 0.00
 5 25 7 -5.07 0.00
 5 25 9 -5.75 0.00
 5 25 11 -0.72 0.00
 5 25 13 1.21 0.00
 5 25 15 3.60 0.00
 5 25 17 4.98 0.00
 5 25 19 0.72 0.00
 5 25 21 -2.58 0.00
 5 25 23 2.66 0.00
 5 25 25 -6.69 0.00
 5 25 27 9.90 0.00
 5 25 29 -11.63 0.00
 5 27 1 -0.98 0.00
 5 27 3 -2.40 0.00
 5 27 5 13.56 0.00
 5 27 7 0.48 0.00
 5 27 9 3.43 0.00
 5 27 11 -1.65 0.00
 5 27 13 0.29 0.00
 5 27 15 -3.26 0.00
 5 27 17 3.76 0.00
 5 27 19 -3.68 0.00
 5 27 21 -9.66 0.00
 5 27 23 -5.32 0.00
 5 27 25 0.11 0.00
 5 29 1 -7.22 0.00
 5 29 3 -0.56 0.00
 5 29 5 5.00 0.00
 5 29 7 -7.61 0.00
 5 29 9 -4.37 0.00
 5 29 11 -0.65 0.00
 5 29 13 7.59 0.00
 5 29 15 -12.92 0.00
 5 29 17 0.84 0.00
 5 29 19 -7.07 0.00
 5 31 1 -8.55 0.00
 5 31 3 -5.76 0.00
 5 31 5 2.28 0.00
 5 31 7 13.51 0.00
 5 31 9 10.03 0.00
 5 31 11 6.17 0.00
 5 31 13 8.28 0.00
 6 0 0 95.89 0.00
 6 0 2 6.42 0.00
 6 0 4 -23.37 0.00
 6 0 6 56.69 0.00
 6 0 8 7.33 0.00
 6 0 10 -35.66 0.00
 6 0 12 -33.54 0.00
 6 0 14 15.80 0.00
 6 0 16 -13.60 0.00
 6 0 18 17.41 0.00
 6 0 20 25.16 0.00
 6 0 22 -3.31 0.00
 6 0 24 -3.93 0.00
 6 0 26 -8.26 0.00
 6 0 28 -22.81 0.00
 6 0 30 14.92 0.00
 6 0 32 -10.28 0.00
 6 0 34 -1.05 0.00
 6 0 36 0.16 0.00
 6 0 38 -0.72 0.00
 6 0 40 1.53 0.00
 6 0 42 0.08 0.00
 6 0 44 3.19 0.00
 6 2 0 34.60 0.00
 6 2 2 23.80 0.00
 6 2 4 41.39 0.00
 6 2 6 55.64 0.00
 6 2 8 0.71 0.00
 6 2 10 -35.23 0.00
 6 2 12 -22.48 0.00
 6 2 14 28.80 0.00
 6 2 16 4.06 0.00
 6 2 18 16.02 0.00
 6 2 20 -5.45 0.00
 6 2 22 0.52 0.00
 6 2 24 19.19 0.00
 6 2 26 6.25 0.00
 6 2 28 -21.70 0.00
 6 2 30 2.88 0.00
 6 2 32 -4.82 0.00
 6 2 34 -1.99 0.00
 6 2 36 0.30 0.00
 6 2 38 -1.28 0.00
 6 2 40 2.35 0.00
 6 2 42 5.70 0.00
 6 2 44 2.94 0.00
 6 4 0 -21.97 0.00
 6 4 2 -0.58 0.00
 6 4 4 28.63 0.00
 6 4 6 16.89 0.00
 6 4 8 -1.79 0.00
 6 4 10 11.62 0.00
 6 4 12 16.70 0.00
 6 4 14 -3.50 0.00
 6 4 16 -24.29 0.00
 6 4 18 11.28 0.00
 6 4 20 4.55 0.00
 6 4 22 -4.52 0.00
 6 4 24 -7.20 0.00
 6 4 26 -8.58 0.00
 6 4 28 -3.61 0.00
 6 4 30 4.27 0.00
 6 4 32 4.91 0.00
 6 4 34 2.65 0.00
 6 4 36 4.94 0.00
 6 4 38 -4.18 0.00
 6 4 40 -2.65 0.00
 6 4 42 3.90 0.00
 6 4 44 -0.60 0.00
 6 6 0 -0.27 0.00
 6 6 2 -61.01 0.00
 6 6 4 -37.04 0.00
 6 6 6 44.01 0.00
 6 6 8 37.86 0.00
 6 6 10 48.84 0.00
 6 6 12 22.15 0.00
 6 6 14 0.37 0.00
 6 6 16 -4.39 0.00
 6 6 18 -17.62 0.00
 6 6 20 -4.43 0.00
 6 6 22 -18.52 0.00
 6 6 24 -6.74 0.00
 6 6 26 -8.27 0.00
 6 6 28 -4.01 0.00
 6 6 30 2.96 0.00
 6 6 32 6.98 0.00
 6 6 34 1.81 0.00
 6 6 36 4.96 0.00
 6 6 38 -8.97 0.00
 6 6 40 -4.10 0.00
 6 6 42 -2.28 0.00
 6 6 44 -7.41 0.00
 6 8 0 17.41 0.00
 6 8 2 -49.78 0.00
 6 8 4 -11.95 0.00
 6 8 6 23.31 0.00
 6 8 8 -12.98 0.00
 6 8 10 18.64 0.00
 6 8 12 -18.59 0.00
 6 8 14 -10.50 0.00
 6 8 16 15.27 0.00
 6 8 18 -4.80 0.00
 6 8 20 11.39 0.00
 6 8 22 -13.69 0.00
 6 8 24 7.63 0.00
 6 8 26 12.49 0.00
 6 8 28 3.30 0.00
 6 8 30 4.96 0.00
 6 8 32 -4.28 0.00
 6 8 34 -9.56 0.00
 6 8 36 2.16 0.00
 6 8 38 -4.29 0.00
 6 8 40 0.40 0.00
 6 8 42 7.23 0.00
 6 8 44 3.47 0.00
 6 10 0 62.99 0.00
 6 10 2 5.67 0.00
 6 10 4 2.00 0.00
 6 10 6 0.84 0.00
 6 10 8 -19.46 0.00
 6 10 10 -13.16 0.00
 6 10 12 -37.97 0.00
 6 10 14 -11.12 0.00
 6 10 16 7.03 0.00
 6 10 18 -0.57 0.00
 6 10 20 27.94 0.00
 6 10 22 19.73 0.00
 6 10 24 13.82 0.00
 6 10 26 -4.80 0.00
 6 10 28 -16.84 0.00
 6 10 30 4.79 0.00
 6 10 32 -3.78 0.00
 6 10 34 -2.22 0.00
 6 10 36 1.20 0.00
 6 10 38 6.85 0.00
 6 10 40 1.02 0.00
 6 10 42 -2.56 0.00
 6 12 0 -2.02 0.00
 6 12 2 -25.09 0.00
 6 12 4 -2.97 0.00
 6 12 6 5.56 0.00
 6 12 8 -6.46 0.00
 6 12 10 -10.65 0.00
 6 12 12 -1.14 0.00
 6 12 14 5.06 0.00
 6 12 16 -8.53 0.00
 6 12 18 7.81 0.00
 6 12 20 13.27 0.00
 6 12 22 -1.94 0.00
 6 12 24 -3.06 0.00
 6 12 26 7.83 0.00
 6 12 28 -8.64 0.00
 6 12 30 -1.33 0.00
 6 12 32 -11.65 0.00
 6 12 34 1.78 0.00
 6 12 36 5.17 0.00
 6 12 38 1.26 0.00
 6 12 40 -5.94 0.00
 6 12 42 0.31 0.00
 6 14 0 24.29 0.00
 6 14 2 2.97 0.00
 6 14 4 12.90 0.00
 6 14 6 -8.18 0.00
 6 14 8 -3.87 0.00
 6 14 10 -0.55 0.00
 6 14 12 -0.26 0.00
 6 14 14 -4.76 0.00
 6 14 16 -9.14 0.00
 6 14 18 19.04 0.00
 6 14 20 5.15 0.00
 6 14 22 2.69 0.00
 6 14 24 1.12 0.00
 6 14 26 1.95 0.00
 6 14 28 -7.57 0.00
 6 14 30 1.39 0.00
 6 14 32 -0.12 0.00
 6 14 34 -4.24 0.00
 6 14 36 -6.11 0.00
 6 14 38 -0.50 0.00
 6 14 40 -3.98 0.00
 6 16 0 4.88 0.00
 6 16 2 -13.76 0.00
 6 16 4 -3.71 0.00
 6 16 6 -3.40 0.00
 6 16 8 4.33 0.00
 6 16 10 -11.04 0.00
 6 16 12 -11.06 0.00
 6 16 14 -0.95 0.00
 6 16 16 3.27 0.00
 6 16 18 5.05 0.00
 6 16 20 -4.59 0.00
 6 16 22 0.15 0.00
 6 16 24 2.10 0.00
 6 16 26 2.92 0.00
 6 16 28 0.61 0.00
 6 16 30 -5.04 0.00
 6 16 32 -0.44 0.00
 6 16 34 -2.85 0.00
 6 16 36 -0.88 0.00
 6 16 38 4.31 0.00
 6 18 0 11.96 0.00
 6 18 2 -14.28 0.00
 6 18 4 -11.95 0.00
 6 18 6 9.04 0.00
 6 18 8 -0.19 0.00
 6 18 10 0.56 0.00
 6 18 12 -5.80 0.00
 6 18 14 -10.19 0.00
 6 18 16 -1.52 0.00
 6 18 18 -4.75 0.00
 6 18 20 3.30 0.00
 6 18 22 7.01 0.00
 6 18 24 -2.26 0.00
 6 18 26 -8.04 0.00
 6 18 28 -7.02 0.00
 6 18 30 -3.66 0.00
 6 18 32 2.54 0.00
 6 18 34 -8.93 0.00
 6 18 36 5.21 0.00
 6 20 0 5.00 0.00
 6 20 2 -7.97 0.00
 6 20 4 3.04 0.00
 6 20 6 10.61 0.00
 6 20 8 -22.56 0.00
 6 20 10 11.61 0.00
 6 20 12 11.50 0.00
 6 20 14 8.91 0.00
 6 20 16 9.78 0.00
 6 20 18 -5.53 0.00
 6 20 20 -7.27 0.00
 6 20 22 -5.44 0.00
 6 20 24 -6.30 0.00
 6 20 26 4.59 0.00
 6 20 28 13.72 0.00
 6 20 30 -0.26 0.00
 6 20 32 0.28 0.00
 6 20 34 0.12 0.00
 6 22 0 2.84 0.00
 6 22 2 -1.39 0.00
 6 22 4 1.86 0.00
 6 22 6 5.19 0.00
 6 22 8 -15.45 0.00
 6 22 10 -2.86 0.00
 6 22 12 -8.50 0.00
 6 22 14 -4.33 0.00
 6 22 16 -2.79 0.00
 6 22 18 -4.55 0.00
 6 22 20 6.08 0.00
 6 22 22 6.23 0.00
 6 22 24 -1.70 0.00
 6 22 26 -0.97 0.00
 6 22 28 4.31 0.00
 6 22 30 -4.00 0.00
 6 22 32 -0.37 0.00
 6 24 0 -4.33 0.00
 6 24 2 -3.69 0.00
 6 24 4 0.20 0.00
 6 24 6 0.13 0.00
 6 24 8 0.66 0.00
 6 24 10 6.72 0.00
 6 24 12 7.88 0.00
 6 24 14 2.68 0.00
 6 24 16 -1.11 0.00
 6 24 18 -0.34 0.00
 6 24 20 1.75 0.00
 6 24 22 -2.58 0.00
 6 24 24 -2.44 0.00
 6 24 26 -2.95 0.00
 6 24 28 -4.17 0.00
 6 24 30 -8.68 0.00
 6 26 0 6.01 0.00
 6 26 2 -1.89 0.00
 6 26 4 -2.95 0.00
 6 26 6 -4.11 0.00
 6 26 8 0.18 0.00
 6 26 10 -2.74 0.00
 6 26 12 -3.99 0.00
 6 26 14 5.43 0.00
 6 26 16 -6.30 0.00
 6 26 18 -2.33 0.00
 6 26 20 -3.37 0.00
 6 26 22 -5.21 0.00
 6 26 24 -8.27 0.00
 6 26 26 -7.84 0.00
 6 28 0 4.94 0.00
 6 28 2 2.59 0.00
 6 28 4 -1.25 0.00
 6 28 6 -6.04 0.00
 6 28 8 -1.18 0.00
 6 28 10 -0.21 0.00
 6 28 12 -3.60 0.00
 6 28 14 18.90 0.00
 6 28 16 -3.60 0.00
 6 28 18 1.69 0.00
 6 28 20 2.00 0.00
 6 30 0 -5.96 0.00
 6 30 2 2.75 0.00
 6 30 4 5.02 0.00
 6 30 6 8.20 0.00
 6 30 8 3.47 0.00
 6 30 10 5.15 0.00
 6 30 12 -3.73 0.00
 6 30 14 7.03 0.00
 7 1 1 -17.27 0.00
 7 1 3 -64.58 0.00
 7 1 5 18.19 0.00
 7 1 7 -46.63 0.00
 7 1 9 -2.81 0.00
 7 1 11 41.87 0.00
 7 1 13 16.16 0.00
 7 1 15 21.41 0.00
 7 1 17 -9.39 0.00
 7 1 19 -18.74 0.00
 7 1 21 -14.07 0.00
 7 1 23 -21.79 0.00
 7 1 25 -12.00 0.00
 7 1 27 4.67 0.00
 7 1 29 8.47 0.00
 7 1 31 9.79 0.00
 7 1 33 3.47 0.00
 7 1 35 6.41 0.00
 7 1 37 0.44 0.00
 7 1 39 0.24 0.00
 7 1 41 -6.54 0.00
 7 1 43 -7.09 0.00
 7 3 1 -28.72 0.00
 7 3 3 -7.60 0.00
 7 3 5 -9.49 0.00
 7 3 7 -37.13 0.00
 7 3 9 7.10 0.00
 7 3 11 0.26 0.00
 7 3 13 1.31 0.00
 7 3 15 4.81 0.00
 7 3 17 8.33 0.00
 7 3 19 1.21 0.00
 7 3 21 -3.04 0.00
 7 3 23 9.82 0.00
 7 3 25 -14.76 0.00
 7 3 27 1.29 0.00
 7 3 29 0.23 0.00
 7 3 31 0.86 0.00
 7 3 33 5.01 0.00
 7 3 35 -0.39 0.00
 7 3 37 1.35 0.00
 7 3 39 0.59 0.00
 7 3 41 -1.96 0.00
 7 3 43 0.27 0.00
 7 5 1 4.22 0.00
 7 5 3 36.84 0.00
 7 5 5 -15.78 0.00
 7 5 7 -5.58 0.00
 7 5 9 -18.21 0.00
 7 5 11 -43.13 0.00
 7 5 13 1.83 0.00
 7 5 15 11.89 0.00
 7 5 17 15.70 0.00
 7 5 19 1.84 0.00
 7 5 21 -15.68 0.00
 7 5 23 11.28 0.00
 7 5 25 -6.81 0.00
 7 5 27 0.53 0.00
 7 5 29 1.66 0.00
 7 5 31 -11.90 0.00
 7 5 33 5.73 0.00
 7 5 35 -0.84 0.00
 7 5 37 3.43 0.00
 7 5 39 4.63 0.00
 7 5 41 1.69 0.00
 7 5 43 -3.10 0.00
 7 7 1 79.08 0.00
 7 7 3 92.05 0.00
 7 7 5 10.70 0.00
 7 7 7 -33.65 0.00
 7 7 9 -50.66 0.00
 7 7 11 -40.23 0.00
 7 7 13 12.86 0.00
 7 7 15 2.97 0.00
 7 7 17 -3.17 0.00
 7 7 19 7.84 0.00
 7 7 21 -7.57 0.00
 7 7 23 8.88 0.00
 7 7 25 -2.94 0.00
 7 7 27 -9.26 0.00
 7 7 29 4.23 0.00
 7 7 31 -7.27 0.00
 7 7 33 -2.58 0.00
 7 7 35 0.03 0.00
 7 7 37 1.68 0.00
 7 7 39 1.40 0.00
 7 7 41 3.21 0.00
 7 7 43 -1.47 0.00
 7 9 1 -34.42 0.00
 7 9 3 18.97 0.00
 7 9 5 -3.64 0.00
 7 9 7 -18.35 0.00
 7 9 9 17.26 0.00
 7 9 11 -0.24 0.00
 7 9 13 -6.92 0.00
 7 9 15 -9.49 0.00
 7 9 17 6.11 0.00
 7 9 19 17.14 0.00
 7 9 21 -9.43 0.00
 7 9 23 -2.51 0.00
 7 9 25 0.13 0.00
 7 9 27 -10.56 0.00
 7 9 29 4.99 0.00
 7 9 31 1.27 0.00
 7 9 33 -1.51 0.00
 7 9 35 1.31 0.00
 7 9 37 -7.64 0.00
 7 9 39 1.06 0.00
 7 9 41 9.18 0.00
 7 11 1 2.14 0.00
 7 11 3 0.98 0.00
 7 11 5 4.18 0.00
 7 11 7 18.84 0.00
 7 11 9 24.40 0.00
 7 11 11 2.73 0.00
 7 11 13 13.66 0.00
 7 11 15 26.11 0.00
 7 11 17 -2.57 0.00
 7 11 19 -12.34 0.00
 7 11 21 -12.64 0.00
 7 11 23 -16.90 0.00
 7 11 25 -5.72 0.00
 7 11 27 -6.07 0.00
 7 11 29 7.39 0.00
 7 11 31 0.52 0.00
 7 11 33 0.20 0.00
 7 11 35 8.39 0.00
 7 11 37 -4.06 0.00
 7 11 39 0.02 0.00
 7 11 41 -1.05 0.00
 7 13 1 16.05 0.00
 7 13 3 -18.43 0.00
 7 13 5 3.41 0.00
 7 13 7 0.88 0.00
 7 13 9 4.73 0.00
 7 13 11 -0.79 0.00
 7 13 13 -8.81 0.00
 7 13 15 6.76 0.00
 7 13 17 -4.73 0.00
 7 13 19 -6.59 0.00
 7 13 21 -2.99 0.00
 7 13 23 -7.52 0.00
 7 13 25 6.54 0.00
 7 13 27 4.28 0.00
 7 13 29 1.98 0.00
 7 13 31 3.40 0.00
 7 13 33 0.85 0.00
 7 13 35 1.69 0.00
 7 13 37 -1.86 0.00
 7 13 39 -1.07 0.00
 7 15 1 -13.44 0.00
 7 15 3 -11.97 0.00
 7 15 5 9.91 0.00
 7 15 7 -13.21 0.00
 7 15 9 -3.43 0.00
 7 15 11 14.29 0.00
 7 15 13 5.76 0.00
 7 15 15 8.03 0.00
 7 15 17 -5.28 0.00
 7 15 19 -6.68 0.00
 7 15 21 -1.47 0.00
 7 15 23 -4.81 0.00
 7 15 25 -0.63 0.00
 7 15 27 2.84 0.00
 7 15 29 -0.14 0.00
 7 15 31 -1.18 0.00
 7 15 33 -1.93 0.00
 7 15 35 -2.01 0.00
 7 15 37 0.96 0.00
 7 15 39 -7.69 0.00
 7 17 1 0.61 0.00
 7 17 3 12.47 0.00
 7 17 5 10.70 0.00
 7 17 7 5.51 0.00
 7 17 9 -1.46 0.00
 7 17 11 4.71 0.00
 7 17 13 6.30 0.00
 7 17 15 5.80 0.00
 7 17 17 2.66 0.00
 7 17 19 2.72 0.00
 7 17 21 4.82 0.00
 7 17 23 4.06 0.00
 7 17 25 4.57 0.00
 7 17 27 -0.61 0.00
 7 17 29 -11.07 0.00
 7 17 31 2.49 0.00
 7 17 33 0.90 0.00
 7 17 35 -0.62 0.00
 7 17 37 -3.93 0.00
 7 19 1 2.63 0.00
 7 19 3 1.01 0.00
 7 19 5 -11.79 0.00
 7 19 7 0.22 0.00
 7 19 9 2.23 0.00
 7 19 11 5.89 0.00
 7 19 13 10.95 0.00
 7 19 15 1.44 0.00
 7 19 17 -1.02 0.00
 7 19 19 -0.44 0.00
 7 19 21 0.18 0.00
 7 19 23 0.47 0.00
 7 19 25 0.97 0.00
 7 19 27 15.18 0.00
 7 19 29 -0.05 0.00
 7 19 31 -0.38 0.00
 7 19 33 -4.07 0.00
 7 19 35 -2.35 0.00
 7 21 1 11.30 0.00
 7 21 3 6.26 0.00
 7 21 5 -6.28 0.00
 7 21 7 2.94 0.00
 7 21 9 -3.99 0.00
 7 21 11 -9.67 0.00
 7 21 13 -0.11 0.00
 7 21 15 -1.72 0.00
 7 21 17 -3.59 0.00
 7 21 19 -2.16 0.00
 7 21 21 0.55 0.00
 7 21 23 -0.69 0.00
 7 21 25 -4.81 0.00
 7 21 27 3.73 0.00
 7 21 29 -1.50 0.00
 7 21 31 -0.95 0.00
 7 23 1 -1.97 0.00
 7 23 3 -5.06 0.00
 7 23 5 -6.14 0.00
 7 23 7 3.82 0.00
 7 23 9 4.56 0.00
 7 23 11 5.58 0.00
 7 23 13 3.56 0.00
 7 23 15 0.33 0.00
 7 23 17 5.13 0.00
 7 23 19 4.07 0.00
 7 23 21 -0.02 0.00
 7 23 23 -4.60 0.00
 7 23 25 4.04 0.00
 7 23 27 -1.82 0.00
 7 23 29 0.23 0.00
 7 25 1 2.35 0.00
 7 25 3 -1.77 0.00
 7 25 5 6.37 0.00
 7 25 7 -3.45 0.00
 7 25 9 -0.37 0.00
 7 25 11 4.70 0.00
 7 25 13 -5.81 0.00
 7 25 15 -0.96 0.00
 7 25 17 -3.48 0.00
 7 25 19 -4.18 0.00
 7 25 21 -5.50 0.00
 7 25 23 -5.26 0.00
 7 25 25 8.21 0.00
 7 27 1 10.67 0.00
 7 27 3 -2.09 0.00
 7 27 5 2.41 0.00
 7 27 7 -9.23 0.00
 7 27 9 -5.71 0.00
 7 27 11 -9.17 0.00
 7 27 13 -2.96 0.00
 7 27 15 18.95 0.00
 7 27 17 -2.21 0.00
 7 27 19 -2.88 0.00
 7 27 21 -1.09 0.00
 7 29 1 -5.58 0.00
 7 29 3 -4.10 0.00
 7 29 5 -0.23 0.00
 7 29 7 -4.69 0.00
 7 29 9 2.36 0.00
 7 29 11 -1.17 0.00
 7 29 13 -9.05 0.00
 7 29 15 4.18 0.00
 8 0 0 11.38 0.00
 8 0 2 59.86 0.00
 8 0 4 -3.62 0.00
 8 0 6 -10.59 0.00
 8 0 8 11.59 0.00
 8 0 10 -14.02 0.00
 8 0 12 -5.80 0.00
 8 0 14 -9.73 0.00
 8 0 16 -13.32 0.00
 8 0 18 12.44 0.00
 8 0 20 6.69 0.00
 8 0 22 5.58 0.00
 8 0 24 4.05 0.00
 8 0 26 5.97 0.00
 8 0 28 10.59 0.00
 8 0 30 1.74 0.00
 8 0 32 -12.41 0.00
 8 0 34 -2.29 0.00
 8 0 36 -3.31 0.00
 8 0 38 -3.27 0.00
 8 0 40 -2.97 0.00
 8 0 42 0.25 0.00
 8 2 0 31.35 0.00
 8 2 2 71.83 0.00
 8 2 4 1.14 0.00
 8 2 6 -24.76 0.00
 8 2 8 7.94 0.00
 8 2 10 -16.26 0.00
 8 2 12 -19.63 0.00
 8 2 14 -14.33 0.00
 8 2 16 -7.93 0.00
 8 2 18 11.19 0.00
 8 2 20 -9.83 0.00
 8 2 22 7.64 0.00
 8 2 24 13.99 0.00
 8 2 26 6.61 0.00
 8 2 28 2.94 0.00
 8 2 30 -5.85 0.00
 8 2 32 -5.95 0.00
 8 2 34 -2.70 0.00
 8 2 36 -3.93 0.00
 8 2 38 -1.18 0.00
 8 2 40 -1.69 0.00
 8 2 42 1.94 0.00
 8 4 0 -2.69 0.00
 8 4 2 37.15 0.00
 8 4 4 4.75 0.00
 8 4 6 -17.07 0.00
 8 4 8 5.35 0.00
 8 4 10 5.03 0.00
 8 4 12 7.51 0.00
 8 4 14 -11.88 0.00
 8 4 16 -1.94 0.00
 8 4 18 0.56 0.00
 8 4 20 -4.50 0.00
 8 4 22 2.39 0.00
 8 4 24 0.25 0.00
 8 4 26 0.85 0.00
 8 4 28 15.97 0.00
 8 4 30 1.83 0.00
 8 4 32 -1.22 0.00
 8 4 34 -0.06 0.00
 8 4 36 -2.13 0.00
 8 4 38 8.16 0.00
 8 4 40 -0.85 0.00
 8 4 42 -1.43 0.00
 8 6 0 4.54 0.00
 8 6 2 -35.48 0.00
 8 6 4 -47.13 0.00
 8 6 6 -4.60 0.00
 8 6 8 14.11 0.00
 8 6 10 13.95 0.00
 8 6 12 12.79 0.00
 8 6 14 -2.54 0.00
 8 6 16 14.51 0.00
 8 6 18 -27.56 0.00
 8 6 20 2.00 0.00
 8 6 22 4.22 0.00
 8 6 24 1.50 0.00
 8 6 26 -0.09 0.00
 8 6 28 6.48 0.00
 8 6 30 -0.70 0.00
 8 6 32 0.92 0.00
 8 6 34 6.15 0.00
 8 6 36 -4.37 0.00
 8 6 38 1.62 0.00
 8 6 40 -0.69 0.00
 8 6 42 -8.60 0.00
 8 8 0 0.65 0.00
 8 8 2 -50.66 0.00
 8 8 4 -11.93 0.00
 8 8 6 1.38 0.00
 8 8 8 0.60 0.00
 8 8 10 24.89 0.00
 8 8 12 18.26 0.00
 8 8 14 6.69 0.00
 8 8 16 14.06 0.00
 8 8 18 -20.64 0.00
 8 8 20 -1.71 0.00
 8 8 22 -10.51 0.00
 8 8 24 -1.89 0.00
 8 8 26 11.72 0.00
 8 8 28 6.39 0.00
 8 8 30 3.67 0.00
 8 8 32 0.76 0.00
 8 8 34 3.26 0.00
 8 8 36 0.06 0.00
 8 8 38 -2.07 0.00
 8 8 40 -0.72 0.00
 8 8 42 -21.02 0.00
 8 10 0 -4.34 0.00
 8 10 2 -5.47 0.00
 8 10 4 17.42 0.00
 8 10 6 -11.59 0.00
 8 10 8 -6.31 0.00
 8 10 10 8.59 0.00
 8 10 12 12.46 0.00
 8 10 14 12.28 0.00
 8 10 16 -2.12 0.00
 8 10 18 -16.72 0.00
 8 10 20 -2.91 0.00
 8 10 22 -1.94 0.00
 8 10 24 -1.29 0.00
 8 10 26 -5.28 0.00
 8 10 28 -1.65 0.00
 8 10 30 10.79 0.00
 8 10 32 3.95 0.00
 8 10 34 7.40 0.00
 8 10 36 2.18 0.00
 8 10 38 0.12 0.00
 8 10 40 3.09 0.00
 8 12 0 -9.17 0.00
 8 12 2 15.90 0.00
 8 12 4 5.68 0.00
 8 12 6 -19.45 0.00
 8 12 8 -1.35 0.00
 8 12 10 -12.19 0.00
 8 12 12 -0.72 0.00
 8 12 14 -1.35 0.00
 8 12 16 -19.51 0.00
 8 12 18 -1.64 0.00
 8 12 20 -1.48 0.00
 8 12 22 -2.86 0.00
 8 12 24 4.09 0.00
 8 12 26 1.64 0.00
 8 12 28 7.71 0.00
 8 12 30 -2.49 0.00
 8 12 32 -7.26 0.00
 8 12 34 3.42 0.00
 8 12 36 2.43 0.00
 8 12 38 -5.89 0.00
 8 12 40 1.49 0.00
 8 14 0 -21.14 0.00
 8 14 2 2.44 0.00
 8 14 4 -2.09 0.00
 8 14 6 -12.51 0.00
 8 14 8 9.43 0.00
 8 14 10 -1.07 0.00
 8 14 12 6.63 0.00
 8 14 14 10.84 0.00
 8 14 16 -4.32 0.00
 8 14 18 6.72 0.00
 8 14 20 -11.26 0.00
 8 14 22 -2.31 0.00
 8 14 24 5.85 0.00
 8 14 26 -5.03 0.00
 8 14 28 14.48 0.00
 8 14 30 0.89 0.00
 8 14 32 0.73 0.00
 8 14 34 -6.42 0.00
 8 14 36 -6.12 0.00
 8 14 38 4.90 0.00
 8 16 0 6.92 0.00
 8 16 2 20.18 0.00
 8 16 4 9.71 0.00
 8 16 6 -0.90 0.00
 8 16 8 4.74 0.00
 8 16 10 -5.32 0.00
 8 16 12 -8.88 0.00
 8 16 14 -3.93 0.00
 8 16 16 -9.24 0.00
 8 16 18 2.45 0.00
 8 16 20 0.27 0.00
 8 16 22 3.01 0.00
 8 16 24 -1.70 0.00
 8 16 26 -10.52 0.00
 8 16 28 1.56 0.00
 8 16 30 -3.46 0.00
 8 16 32 5.45 0.00
 8 16 34 2.75 0.00
 8 16 36 -2.22 0.00
 8 18 0 -5.51 0.00
 8 18 2 -5.89 0.00
 8 18 4 -3.74 0.00
 8 18 6 -1.43 0.00
 8 18 8 -3.18 0.00
 8 18 10 2.15 0.00
 8 18 12 -5.83 0.00
 8 18 14 -1.27 0.00
 8 18 16 -1.25 0.00
 8 18 18 2.07 0.00
 8 18 20 -1.80 0.00
 8 18 22 1.96 0.00
 8 18 24 1.74 0.00
 8 18 26 3.16 0.00
 8 18 28 -4.79 0.00
 8 18 30 0.51 0.00
 8 18 32 2.61 0.00
 8 18 34 -1.21 0.00
 8 20 0 2.97 0.00
 8 20 2 -3.53 0.00
 8 20 4 2.92 0.00
 8 20 6 -1.54 0.00
 8 20 8 -9.04 0.00
 8 20 10 4.62 0.00
 8 20 12 -2.11 0.00
 8 20 14 -1.78 0.00
 8 20 16 1.66 0.00
 8 20 18 -4.24 0.00
 8 20 20 -5.17 0.00
 8 20 22 -4.87 0.00
 8 20 24 -6.81 0.00
 8 20 26 -0.47 0.00
 8 20 28 -7.56 0.00
 8 20 30 -8.13 0.00
 8 20 32 -5.19 0.00
 8 22 0 1.78 0.00
 8 22 2 -1.32 0.00
 8 22 4 -1.00 0.00
 8 22 6 0.63 0.00
 8 22 8 5.38 0.00
 8 22 10 -0.98 0.00
 8 22 12 -3.23 0.00
 8 22 14 -1.59 0.00
 8 22 16 4.76 0.00
 8 22 18 -5.17 0.00
 8 22 20 -0.22 0.00
 8 22 22 2.19 0.00
 8 22 24 0.90 0.00
 8 22 26 5.60 0.00
 8 22 28 1.62 0.00
 8 24 0 1.13 0.00
 8 24 2 3.37 0.00
 8 24 4 3.74 0.00
 8 24 6 -3.07 0.00
 8 24 8 2.49 0.00
 8 24 10 0.87 0.00
 8 24 12 2.33 0.00
 8 24 14 -8.19 0.00
 8 24 16 -1.80 0.00
 8 24 18 9.48 0.00
 8 24 20 11.97 0.00
 8 24 22 11.15 0.00
 8 24 24 12.67 0.00
 8 24 26 13.81 0.00
 8 26 0 4.58 0.00
 8 26 2 -0.27 0.00
 8 26 4 -0.03 0.00
 8 26 6 -2.62 0.00
 8 26 8 -0.76 0.00
 8 26 10 1.02 0.00
 8 26 12 3.72 0.00
 8 26 14 -4.84 0.00
 8 26 16 -10.59 0.00
 8 26 18 3.43 0.00
 8 26 20 11.29 0.00
 8 28 2 -2.54 0.00
 8 28 4 0.87 0.00
 8 28 6 2.76 0.00
 8 28 8 4.47 0.00
 8 28 10 -2.59 0.00
 8 28 12 -6.19 0.00
 8 28 14 -6.47 0.00
 9 1 1 -30.86 0.00
 9 1 3 -50.23 0.00
 9 1 5 31.30 0.00
 9 1 7 11.63 0.00
 9 1 9 8.14 0.00
 9 1 11 12.82 0.00
 9 1 13 9.31 0.00
 9 1 15 6.49 0.00
 9 1 17 7.62 0.00
 9 1 19 -18.63 0.00
 9 1 21 16.04 0.00
 9 1 23 1.45 0.00
 9 1 25 3.88 0.00
 9 1 27 -7.12 0.00
 9 1 29 -2.26 0.00
 9 1 31 -6.18 0.00
 9 1 33 2.71 0.00
 9 1 35 5.04 0.00
 9 1 37 5.03 0.00
 9 1 39 -2.32 0.00
 9 1 41 8.78 0.00
 9 3 1 -29.38 0.00
 9 3 3 -7.48 0.00
 9 3 5 4.93 0.00
 9 3 7 -12.78 0.00
 9 3 9 6.03 0.00
 9 3 11 3.09 0.00
 9 3 13 9.69 0.00
 9 3 15 -2.59 0.00
 9 3 17 9.76 0.00
 9 3 19 9.31 0.00
 9 3 21 15.10 0.00
 9 3 23 0.22 0.00
 9 3 25 -13.21 0.00
 9 3 27 -6.16 0.00
 9 3 29 -2.33 0.00
 9 3 31 -3.48 0.00
 9 3 33 0.00 0.00
 9 3 35 2.04 0.00
 9 3 37 3.83 0.00
 9 3 39 1.62 0.00
 9 3 41 3.09 0.00
 9 5 1 -44.99 0.00
 9 5 3 5.48 0.00
 9 5 5 -6.29 0.00
 9 5 7 26.60 0.00
 9 5 9 30.06 0.00
 9 5 11 7.66 0.00
 9 5 13 4.03 0.00
 9 5 15 -1.04 0.00
 9 5 17 -4.28 0.00
 9 5 19 -8.38 0.00
 9 5 21 -10.77 0.00
 9 5 23 -0.04 0.00
 9 5 25 -4.72 0.00
 9 5 27 3.78 0.00
 9 5 29 5.46 0.00
 9 5 31 -3.94 0.00
 9 5 33 3.07 0.00
 9 5 35 1.85 0.00
 9 5 37 -9.25 0.00
 9 5 39 -9.10 0.00
 9 5 41 -14.70 0.00
 9 7 1 12.75 0.00
 9 7 3 9.74 0.00
 9 7 5 -11.33 0.00
 9 7 7 9.38 0.00
 9 7 9 6.04 0.00
 9 7 11 2.44 0.00
 9 7 13 -4.99 0.00
 9 7 15 -14.59 0.00
 9 7 17 -13.38 0.00
 9 7 19 5.99 0.00
 9 7 21 1.62 0.00
 9 7 23 9.40 0.00
 9 7 25 -0.71 0.00
 9 7 27 11.66 0.00
 9 7 29 7.43 0.00
 9 7 31 -4.15 0.00
 9 7 33 -5.99 0.00
 9 7 35 1.22 0.00
 9 7 37 -4.81 0.00
 9 7 39 1.67 0.00
 9 9 1 6.72 0.00
 9 9 3 1.63 0.00
 9 9 5 8.75 0.00
 9 9 7 9.18 0.00
 9 9 9 -2.04 0.00
 9 9 11 -15.01 0.00
 9 9 13 -23.91 0.00
 9 9 15 -3.68 0.00
 9 9 17 5.46 0.00
 9 9 19 7.63 0.00
 9 9 21 1.11 0.00
 9 9 23 19.63 0.00
 9 9 25 1.98 0.00
 9 9 27 0.06 0.00
 9 9 29 -4.30 0.00
 9 9 31 -0.93 0.00
 9 9 33 -4.91 0.00
 9 9 35 -0.81 0.00
 9 9 37 0.15 0.00
 9 9 39 3.10 0.00
 9 11 1 -4.32 0.00
 9 11 3 -11.84 0.00
 9 11 5 4.46 0.00
 9 11 7 18.11 0.00
 9 11 9 -3.43 0.00
 9 11 11 -16.14 0.00
 9 11 13 -18.46 0.00
 9 11 15 2.57 0.00
 9 11 17 -4.50 0.00
 9 11 19 -2.52 0.00
 9 11 21 15.19 0.00
 9 11 23 9.35 0.00
 9 11 25 -2.84 0.00
 9 11 27 3.94 0.00
 9 11 29 0.53 0.00
 9 11 31 -10.01 0.00
 9 11 33 -3.12 0.00
 9 11 35 2.58 0.00
 9 11 37 1.39 0.00
 9 11 39 -1.65 0.00
 9 13 1 14.53 0.00
 9 13 3 -12.83 0.00
 9 13 5 1.76 0.00
 9 13 7 4.15 0.00
 9 13 9 -15.78 0.00
 9 13 11 -3.93 0.00
 9 13 13 8.62 0.00
 9 13 15 12.08 0.00
 9 13 17 8.29 0.00
 9 13 19 1.46 0.00
 9 13 21 14.71 0.00
 9 13 23 3.25 0.00
 9 13 25 -2.72 0.00
 9 13 27 -3.24 0.00
 9 13 29 -3.04 0.00
 9 13 31 0.24 0.00
 9 13 33 3.06 0.00
 9 13 35 -3.18 0.00
 9 13 37 4.40 0.00
 9 15 1 4.26 0.00
 9 15 3 -0.87 0.00
 9 15 5 10.25 0.00
 9 15 7 6.45 0.00
 9 15 9 -4.15 0.00
 9 15 11 6.74 0.00
 9 15 13 -2.27 0.00
 9 15 15 -13.05 0.00
 9 15 17 0.55 0.00
 9 15 19 -0.32 0.00
 9 15 21 -0.61 0.00
 9 15 23 -2.71 0.00
 9 15 25 -2.92 0.00
 9 15 27 -2.74 0.00
 9 15 29 2.58 0.00
 9 15 31 8.39 0.00
 9 15 33 9.41 0.00
 9 15 35 2.61 0.00
 9 17 1 -11.89 0.00
 9 17 3 -4.94 0.00
 9 17 5 -9.61 0.00
 9 17 7 3.00 0.00
 9 17 9 3.66 0.00
 9 17 11 2.22 0.00
 9 17 13 -2.90 0.00
 9 17 15 -1.54 0.00
 9 17 17 3.69 0.00
 9 17 19 -0.66 0.00
 9 17 21 -3.41 0.00
 9 17 23 7.15 0.00
 9 17 25 -0.67 0.00
 9 17 27 -6.84 0.00
 9 17 29 5.67 0.00
 9 17 31 8.75 0.00
 9 17 33 -2.24 0.00
 9 19 1 0.86 0.00
 9 19 3 5.19 0.00
 9 19 5 -3.85 0.00
 9 19 7 4.08 0.00
 9 19 9 2.80 0.00
 9 19 11 0.48 0.00
 9 19 13 0.64 0.00
 9 19 15 1.27 0.00
 9 19 17 3.00 0.00
 9 19 19 4.14 0.00
 9 19 21 -0.76 0.00
 9 19 23 0.36 0.00
 9 19 25 -4.65 0.00
 9 19 27 -3.77 0.00
 9 19 29 4.38 0.00
 9 19 31 -12.30 0.00
 9 21 1 -4.54 0.00
 9 21 3 3.77 0.00
 9 21 5 5.74 0.00
 9 21 7 8.50 0.00
 9 21 9 -3.31 0.00
 9 21 11 -0.31 0.00
 9 21 13 -0.69 0.00
 9 21 15 -4.87 0.00
 9 21 17 -4.45 0.00
 9 21 19 -5.80 0.00
 9 21 21 -1.99 0.00
 9 21 23 -4.88 0.00
 9 21 25 3.01 0.00
 9 21 27 3.83 0.00
 9 23 1 -2.65 0.00
 9 23 3 1.64 0.00
 9 23 5 3.19 0.00
 9 23 7 -5.48 0.00
 9 23 9 -6.30 0.00
 9 23 11 5.09 0.00
 9 23 13 -2.16 0.00
 9 23 15 -14.85 0.00
 9 23 17 7.56 0.00
 9 23 19 8.76 0.00
 9 23 21 7.06 0.00
 9 23 23 17.10 0.00
 9 23 25 20.43 0.00
 9 25 1 -11.01 0.00
 9 25 3 -1.45 0.00
 9 25 5 3.31 0.00
 9 25 7 2.95 0.00
 9 25 9 3.06 0.00
 9 25 11 1.96 0.00
 9 25 13 1.79 0.00
 9 25 15 -0.45 0.00
 9 25 17 12.61 0.00
 9 25 19 0.34 0.00
 9 27 1 -3.81 0.00
 9 27 3 8.77 0.00
 9 27 5 -5.91 0.00
 9 27 7 6.95 0.00
 9 27 9 4.76 0.00
 9 27 11 4.99 0.00
 9 27 13 18.22 0.00
 10 0 0 -20.60 0.00
 10 0 2 14.71 0.00
 10 0 4 14.25 0.00
 10 0 6 -0.33 0.00
 10 0 8 10.28 0.00
 10 0 10 -5.73 0.00
 10 0 12 12.59 0.00
 10 0 14 -0.02 0.00
 10 0 16 -13.58 0.00
 10 0 18 -20.57 0.00
 10 0 20 -10.11 0.00
 10 0 22 -2.36 0.00
 10 0 24 -11.90 0.00
 10 0 26 -7.89 0.00
 10 0 28 16.68 0.00
 10 0 30 2.48 0.00
 10 0 32 3.20 0.00
 10 0 34 4.54 0.00
 10 0 36 -2.95 0.00
 10 0 38 -8.94 0.00
 10 2 0 -5.00 0.00
 10 2 2 10.01 0.00
 10 2 4 1.79 0.00
 10 2 6 2.14 0.00
 10 2 8 13.04 0.00
 10 2 10 -2.67 0.00
 10 2 12 -5.98 0.00
 10 2 14 -6.20 0.00
 10 2 16 -4.26 0.00
 10 2 18 -0.77 0.00
 10 2 20 -4.69 0.00
 10 2 22 -0.56 0.00
 10 2 24 -11.03 0.00
 10 2 26 -3.14 0.00
 10 2 28 13.71 0.00
 10 2 30 0.72 0.00
 10 2 32 3.21 0.00
 10 2 34 -2.35 0.00
 10 2 36 -3.37 0.00
 10 2 38 -0.21 0.00
 10 4 0 -9.26 0.00
 10 4 2 6.09 0.00
 10 4 4 3.16 0.00
 10 4 6 12.03 0.00
 10 4 8 -3.20 0.00
 10 4 10 0.63 0.00
 10 4 12 -10.77 0.00
 10 4 14 -5.78 0.00
 10 4 16 6.07 0.00
 10 4 18 -5.28 0.00
 10 4 20 0.51 0.00
 10 4 22 11.80 0.00
 10 4 24 -6.49 0.00
 10 4 26 -4.40 0.00
 10 4 28 -1.12 0.00
 10 4 30 -9.29 0.00
 10 4 32 -2.96 0.00
 10 4 34 1.79 0.00
 10 4 36 -1.11 0.00
 10 4 38 -2.12 0.00
 10 6 0 31.11 0.00
 10 6 2 17.31 0.00
 10 6 4 1.66 0.00
 10 6 6 17.84 0.00
 10 6 8 -21.00 0.00
 10 6 10 -18.55 0.00
 10 6 12 -18.47 0.00
 10 6 14 -5.09 0.00
 10 6 16 20.76 0.00
 10 6 18 -8.30 0.00
 10 6 20 13.20 0.00
 10 6 22 15.66 0.00
 10 6 24 -12.64 0.00
 10 6 26 -1.66 0.00
 10 6 28 0.13 0.00
 10 6 30 -4.68 0.00
 10 6 32 -6.33 0.00
 10 6 34 -0.24 0.00
 10 6 36 -0.45 0.00
 10 6 38 -2.46 0.00
 10 8 0 46.04 0.00
 10 8 2 10.94 0.00
 10 8 4 2.81 0.00
 10 8 6 8.91 0.00
 10 8 8 -24.05 0.00
 10 8 10 -11.88 0.00
 10 8 12 3.56 0.00
 10 8 14 1.50 0.00
 10 8 16 18.83 0.00
 10 8 18 5.34 0.00
 10 8 20 14.35 0.00
 10 8 22 5.63 0.00
 10 8 24 -13.91 0.00
 10 8 26 -4.91 0.00
 10 8 28 -13.31 0.00
 10 8 30 -5.75 0.00
 10 8 32 0.61 0.00
 10 8 34 -5.52 0.00
 10 8 36 2.14 0.00
 10 8 38 -9.22 0.00
 10 10 0 -29.44 0.00
 10 10 2 -16.77 0.00
 10 10 4 -4.56 0.00
 10 10 6 -7.20 0.00
 10 10 8 0.39 0.00
 10 10 10 11.05 0.00
 10 10 12 12.05 0.00
 10 10 14 -4.74 0.00
 10 10 16 6.02 0.00
 10 10 18 -1.82 0.00
 10 10 20 2.85 0.00
 10 10 22 -2.39 0.00
 10 10 24 -8.44 0.00
 10 10 26 -6.09 0.00
 10 10 28 -6.75 0.00
 10 10 30 0.75 0.00
 10 10 32 -3.95 0.00
 10 10 34 -3.48 0.00
 10 10 36 9.80 0.00
 10 10 38 -14.99 0.00
 10 12 0 1.96 0.00
 10 12 2 15.92 0.00
 10 12 4 -6.39 0.00
 10 12 6 -15.59 0.00
 10 12 8 17.36 0.00
 10 12 10 13.55 0.00
 10 12 12 4.62 0.00
 10 12 14 -4.89 0.00
 10 12 16 4.95 0.00
 10 12 18 1.79 0.00
 10 12 20 3.31 0.00
 10 12 22 -0.87 0.00
 10 12 24 -3.96 0.00
 10 12 26 2.38 0.00
 10 12 28 1.50 0.00
 10 12 30 0.74 0.00
 10 12 32 -6.96 0.00
 10 12 34 -3.00 0.00
 10 12 36 7.78 0.00
 10 14 0 -0.03 0.00
 10 14 2 1.64 0.00
 10 14 4 -3.15 0.00
 10 14 6 5.28 0.00
 10 14 8 12.86 0.00
 10 14 10 -2.65 0.00
 10 14 12 -3.30 0.00
 10 14 14 -1.90 0.00
 10 14 16 2.05 0.00
 10 14 18 -0.44 0.00
 10 14 20 -4.14 0.00
 10 14 22 0.36 0.00
 10 14 24 -6.11 0.00
 10 14 26 3.96 0.00
 10 14 28 0.29 0.00
 10 14 30 -3.43 0.00
 10 14 32 -7.02 0.00
 10 14 34 -8.60 0.00
 10 16 0 -10.82 0.00
 10 16 2 -13.04 0.00
 10 16 4 -11.41 0.00
 10 16 6 -5.88 0.00
 10 16 8 -5.45 0.00
 10 16 10 -1.24 0.00
 10 16 12 -1.32 0.00
 10 16 14 1.13 0.00
 10 16 16 2.23 0.00
 10 16 18 -3.61 0.00
 10 16 20 -1.12 0.00
 10 16 22 4.34 0.00
 10 16 24 -4.20 0.00
 10 16 26 12.28 0.00
 10 16 28 2.50 0.00
 10 16 30 -6.99 0.00
 10 16 32 -8.17 0.00
 10 18 0 7.80 0.00
 10 18 2 4.60 0.00
 10 18 4 6.26 0.00
 10 18 6 1.31 0.00
 10 18 8 -6.11 0.00
 10 18 10 0.09 0.00
 10 18 12 -3.03 0.00
 10 18 14 1.56 0.00
 10 18 16 4.66 0.00
 10 18 18 5.93 0.00
 10 18 20 6.03 0.00
 10 18 22 5.83 0.00
 10 18 24 -5.63 0.00
 10 18 26 1.53 0.00
 10 18 28 -9.42 0.00
 10 18 30 -8.89 0.00
 10 20 0 6.26 0.00
 10 20 2 7.22 0.00
 10 20 4 0.61 0.00
 10 20 6 2.69 0.00
 10 20 8 2.30 0.00
 10 20 10 -0.50 0.00
 10 20 12 0.58 0.00
 10 20 14 2.59 0.00
 10 20 16 0.34 0.00
 10 20 18 -5.14 0.00
 10 20 20 -5.88 0.00
 10 20 22 3.44 0.00
 10 20 24 1.41 0.00
 10 20 26 8.83 0.00
 10 22 0 -6.45 0.00
 10 22 2 -0.57 0.00
 10 22 4 -10.40 0.00
 10 22 6 -8.53 0.00
 10 22 8 -2.49 0.00
 10 22 10 -6.42 0.00
 10 22 12 3.12 0.00
 10 22 14 5.13 0.00
 10 22 16 4.94 0.00
 10 22 18 10.95 0.00
 10 22 20 9.39 0.00
 10 22 22 7.46 0.00
 10 24 0 -5.65 0.00
 10 24 2 -1.01 0.00
 10 24 4 3.17 0.00
 10 24 6 -0.93 0.00
 10 24 8 -2.98 0.00
 10 24 10 -2.07 0.00
 10 24 12 10.37 0.00
 10 24 14 9.61 0.00
 10 24 16 0.96 0.00
 10 24 18 -2.88 0.00
 10 26 0 4.56 0.00
 10 26 2 7.86 0.00
 10 26 4 3.23 0.00
 10 26 6 1.68 0.00
 10 26 8 2.82 0.00
 10 26 10 3.75 0.00
 10 26 12 3.51 0.00
 10 26 14 -21.52 0.00
 11 1 1 24.64 0.00
 11 1 3 1.81 0.00
 11 1 5 -12.40 0.00
 11 1 7 -11.36 0.00
 11 1 9 -12.79 0.00
 11 1 11 -9.10 0.00
 11 1 13 -12.46 0.00
 11 1 15 -11.87 0.00
 11 1 17 15.37 0.00
 11 1 19 6.48 0.00
 11 1 21 5.60 0.00
 11 1 23 4.93 0.00
 11 1 25 8.65 0.00
 11 1 27 0.24 0.00
 11 1 29 -0.63 0.00
 11 1 31 -7.41 0.00
 11 1 33 -2.39 0.00
 11 1 35 -1.85 0.00
 11 1 37 -3.88 0.00
 11 3 1 22.13 0.00
 11 3 3 17.98 0.00
 11 3 5 -11.02 0.00
 11 3 7 -19.11 0.00
 11 3 9 -15.31 0.00
 11 3 11 -3.62 0.00
 11 3 13 1.98 0.00
 11 3 15 5.27 0.00
 11 3 17 10.92 0.00
 11 3 19 6.48 0.00
 11 3 21 -3.49 0.00
 11 3 23 -4.31 0.00
 11 3 25 -1.86 0.00
 11 3 27 1.95 0.00
 11 3 29 -1.43 0.00
 11 3 31 0.07 0.00
 11 3 33 0.35 0.00
 11 3 35 3.29 0.00
 11 3 37 8.88 0.00
 11 5 1 -4.57 0.00
 11 5 3 14.38 0.00
 11 5 5 -18.21 0.00
 11 5 7 -3.75 0.00
 11 5 9 5.26 0.00
 11 5 11 -3.93 0.00
 11 5 13 -15.95 0.00
 11 5 15 6.47 0.00
 11 5 17 -0.96 0.00
 11 5 19 -6.05 0.00
 11 5 21 -4.52 0.00
 11 5 23 2.65 0.00
 11 5 25 3.85 0.00
 11 5 27 3.26 0.00
 11 5 29 -0.99 0.00
 11 5 31 1.32 0.00
 11 5 33 7.03 0.00
 11 5 35 10.03 0.00
 11 5 37 7.51 0.00
 11 7 1 -20.42 0.00
 11 7 3 -9.42 0.00
 11 7 5 -13.79 0.00
 11 7 7 -0.49 0.00
 11 7 9 9.87 0.00
 11 7 11 15.99 0.00
 11 7 13 9.69 0.00
 11 7 15 5.08 0.00
 11 7 17 -5.40 0.00
 11 7 19 -6.46 0.00
 11 7 21 -5.33 0.00
 11 7 23 -2.51 0.00
 11 7 25 1.28 0.00
 11 7 27 6.18 0.00
 11 7 29 -4.52 0.00
 11 7 31 -1.38 0.00
 11 7 33 6.75 0.00
 11 7 35 8.07 0.00
 11 7 37 -9.61 0.00
 11 9 1 -3.68 0.00
 11 9 3 -5.12 0.00
 11 9 5 5.09 0.00
 11 9 7 -4.63 0.00
 11 9 9 -6.86 0.00
 11 9 11 2.82 0.00
 11 9 13 9.09 0.00
 11 9 15 2.44 0.00
 11 9 17 2.01 0.00
 11 9 19 -8.53 0.00
 11 9 21 -11.39 0.00
 11 9 23 -9.22 0.00
 11 9 25 -11.30 0.00
 11 9 27 -3.20 0.00
 11 9 29 0.77 0.00
 11 9 31 10.62 0.00
 11 9 33 5.95 0.00
 11 9 35 5.39 0.00
 11 9 37 -1.64 0.00
 11 11 1 9.90 0.00
 11 11 3 14.45 0.00
 11 11 5 13.17 0.00
 11 11 7 -3.38 0.00
 11 11 9 -3.16 0.00
 11 11 11 -4.22 0.00
 11 11 13 -1.36 0.00
 11 11 15 1.90 0.00
 11 11 17 -2.03 0.00
 11 11 19 -6.30 0.00
 11 11 21 1.43 0.00
 11 11 23 -1.52 0.00
 11 11 25 3.58 0.00
 11 11 27 12.59 0.00
 11 11 29 2.90 0.00
 11 11 31 -1.15 0.00
 11 11 33 3.63 0.00
 11 11 35 8.52 0.00
 11 13 1 5.12 0.00
 11 13 3 -7.41 0.00
 11 13 5 -3.12 0.00
 11 13 7 -3.22 0.00
 11 13 9 1.46 0.00
 11 13 11 -2.77 0.00
 11 13 13 1.87 0.00
 11 13 15 -1.42 0.00
 11 13 17 -6.19 0.00
 11 13 19 -7.13 0.00
 11 13 21 -1.58 0.00
 11 13 23 0.53 0.00
 11 13 25 -3.12 0.00
 11 13 27 3.15 0.00
 11 13 29 -0.43 0.00
 11 13 31 8.45 0.00
 11 13 33 0.93 0.00
 11 15 1 4.73 0.00
 11 15 3 3.42 0.00
 11 15 5 2.16 0.00
 11 15 7 -6.62 0.00
 11 15 9 -9.96 0.00
 11 15 11 -7.07 0.00
 11 15 13 2.13 0.00
 11 15 15 -0.23 0.00
 11 15 17 5.53 0.00
 11 15 19 3.98 0.00
 11 15 21 1.01 0.00
 11 15 23 11.34 0.00
 11 15 25 2.67 0.00
 11 15 27 0.16 0.00
 11 15 29 -11.19 0.00
 11 15 31 5.98 0.00
 11 17 1 -3.68 0.00
 11 17 3 9.43 0.00
 11 17 5 4.91 0.00
 11 17 7 1.08 0.00
 11 17 9 7.26 0.00
 11 17 11 4.41 0.00
 11 17 13 5.50 0.00
 11 17 15 0.40 0.00
 11 17 17 -2.88 0.00
 11 17 19 -1.70 0.00
 11 17 21 -2.47 0.00
 11 17 23 -1.32 0.00
 11 17 25 -10.12 0.00
 11 17 27 -5.01 0.00
 11 17 29 -9.35 0.00
 11 19 1 -4.22 0.00
 11 19 3 2.84 0.00
 11 19 5 1.20 0.00
 11 19 7 0.19 0.00
 11 19 9 4.79 0.00
 11 19 11 0.23 0.00
 11 19 13 0.20 0.00
 11 19 15 2.28 0.00
 11 19 17 -1.50 0.00
 11 19 19 -1.55 0.00
 11 19 21 -5.03 0.00
 11 19 23 -4.02 0.00
 11 19 25 8.23 0.00
 11 21 1 -3.17 0.00
 11 21 3 -5.77 0.00
 11 21 5 -7.34 0.00
 11 21 7 -0.52 0.00
 11 21 9 0.42 0.00
 11 21 11 -1.13 0.00
 11 21 13 -2.73 0.00
 11 21 15 4.32 0.00
 11 21 17 1.70 0.00
 11 21 19 -1.59 0.00
 11 21 21 -3.70 0.00
 11 21 23 -1.02 0.00
 11 23 1 -4.94 0.00
 11 23 3 -1.88 0.00
 11 23 5 4.55 0.00
 11 23 7 2.84 0.00
 11 23 9 4.51 0.00
 11 23 11 5.00 0.00
 11 23 13 -2.99 0.00
 11 23 15 -15.26 0.00
 11 23 17 -8.60 0.00
 11 23 19 -4.65 0.00
 11 25 1 5.52 0.00
 11 25 3 10.17 0.00
 11 25 5 0.13 0.00
 11 25 7 6.87 0.00
 11 25 9 4.07 0.00
 11 25 11 -1.86 0.00
 11 25 13 11.92 0.00
 11 25 15 12.09 0.00
 12 0 0 -25.26 0.00
 12 0 2 -1.13 0.00
 12 0 4 2.36 0.00
 12 0 6 -0.36 0.00
 12 0 8 -5.95 0.00
 12 0 10 -2.54 0.00
 12 0 12 3.80 0.00
 12 0 14 27.60 0.00
 12 0 16 -11.55 0.00
 12 0 18 -3.52 0.00
 12 0 20 -4.82 0.00
 12 0 22 -1.03 0.00
 12 0 24 8.50 0.00
 12 0 26 -0.78 0.00
 12 0 28 -3.35 0.00
 12 0 30 -8.85 0.00
 12 0 32 -1.04 0.00
 12 0 34 2.98 0.00
 12 2 0 -24.10 0.00
 12 2 2 -12.38 0.00
 12 2 4 -3.12 0.00
 12 2 6 5.67 0.00
 12 2 8 2.41 0.00
 12 2 10 6.56 0.00
 12 2 12 11.49 0.00
 12 2 14 29.99 0.00
 12 2 16 -1.89 0.00
 12 2 18 6.43 0.00
 12 2 20 -0.55 0.00
 12 2 22 0.78 0.00
 12 2 24 3.76 0.00
 12 2 26 -4.02 0.00
 12 2 28 -3.55 0.00
 12 2 30 -5.94 0.00
 12 2 32 5.65 0.00
 12 2 34 -3.14 0.00
 12 4 0 -7.56 0.00
 12 4 2 -10.85 0.00
 12 4 4 -4.92 0.00
 12 4 6 2.33 0.00
 12 4 8 6.64 0.00
 12 4 10 14.32 0.00
 12 4 12 5.56 0.00
 12 4 14 9.69 0.00
 12 4 16 -3.47 0.00
 12 4 18 -1.93 0.00
 12 4 20 -5.27 0.00
 12 4 22 -3.62 0.00
 12 4 24 -1.70 0.00
 12 4 26 1.01 0.00
 12 4 28 6.03 0.00
 12 4 30 -1.33 0.00
 12 4 32 5.57 0.00
 12 4 34 -1.64 0.00
 12 4 36 -8.31 0.00
 12 6 0 6.51 0.00
 12 6 2 -6.97 0.00
 12 6 4 -1.35 0.00
 12 6 6 0.50 0.00
 12 6 8 7.42 0.00
 12 6 10 6.39 0.00
 12 6 12 1.06 0.00
 12 6 14 0.74 0.00
 12 6 16 -6.42 0.00
 12 6 18 -11.07 0.00
 12 6 20 -1.86 0.00
 12 6 22 2.30 0.00
 12 6 24 -0.40 0.00
 12 6 26 3.83 0.00
 12 6 28 8.59 0.00
 12 6 30 3.78 0.00
 12 6 32 0.32 0.00
 12 6 34 -0.42 0.00
 12 8 0 19.40 0.00
 12 8 2 -6.68 0.00
 12 8 4 -8.32 0.00
 12 8 6 2.38 0.00
 12 8 8 13.35 0.00
 12 8 10 -11.67 0.00
 12 8 12 -6.31 0.00
 12 8 14 -5.68 0.00
 12 8 16 -4.56 0.00
 12 8 18 -0.74 0.00
 12 8 20 -3.34 0.00
 12 8 22 5.70 0.00
 12 8 24 12.90 0.00
 12 8 26 13.23 0.00
 12 8 28 5.09 0.00
 12 8 30 2.48 0.00
 12 8 32 -1.94 0.00
 12 8 34 1.12 0.00
 12 10 0 1.56 0.00
 12 10 2 4.56 0.00
 12 10 4 2.57 0.00
 12 10 6 -1.96 0.00
 12 10 8 7.37 0.00
 12 10 10 -10.37 0.00
 12 10 12 -0.87 0.00
 12 10 14 0.62 0.00
 12 10 16 -0.45 0.00
 12 10 18 0.52 0.00
 12 10 20 -3.00 0.00
 12 10 22 -1.14 0.00
 12 10 24 6.16 0.00
 12 10 26 4.64 0.00
 12 10 28 -0.65 0.00
 12 10 30 0.76 0.00
 12 10 32 -1.82 0.00
 12 10 34 7.85 0.00
 12 12 0 -22.15 0.00
 12 12 2 -4.21 0.00
 12 12 4 -0.75 0.00
 12 12 6 -6.14 0.00
 12 12 8 -4.65 0.00
 12 12 10 0.09 0.00
 12 12 12 -2.24 0.00
 12 12 14 2.81 0.00
 12 12 16 -1.04 0.00
 12 12 18 1.61 0.00
 12 12 20 6.48 0.00
 12 12 22 -0.68 0.00
 12 12 24 0.24 0.00
 12 12 26 -4.20 0.00
 12 12 28 -5.96 0.00
 12 12 30 2.89 0.00
 12 12 32 5.04 0.00
 12 14 0 2.54 0.00
 12 14 2 5.20 0.00
 12 14 4 0.87 0.00
 12 14 6 3.18 0.00
 12 14 8 -8.91 0.00
 12 14 10 5.82 0.00
 12 14 12 -2.18 0.00
 12 14 14 -1.80 0.00
 12 14 16 -2.05 0.00
 12 14 18 0.32 0.00
 12 14 20 -0.99 0.00
 12 14 22 -4.57 0.00
 12 14 24 -2.13 0.00
 12 14 26 -5.04 0.00
 12 14 28 -1.85 0.00
 12 14 30 1.83 0.00
 12 16 0 5.24 0.00
 12 16 2 3.80 0.00
 12 16 4 -1.87 0.00
 12 16 6 5.91 0.00
 12 16 8 2.82 0.00
 12 16 10 11.74 0.00
 12 16 12 1.79 0.00
 12 16 14 -4.22 0.00
 12 16 16 0.87 0.00
 12 16 18 -0.34 0.00
 12 16 20 -0.61 0.00
 12 16 22 -5.19 0.00
 12 16 24 -2.54 0.00
 12 16 26 -7.18 0.00
 12 16 28 -0.79 0.00
 12 18 0 1.05 0.00
 12 18 2 -1.19 0.00
 12 18 4 -6.51 0.00
 12 18 6 -2.74 0.00
 12 18 8 1.71 0.00
 12 18 10 0.93 0.00
 12 18 12 -0.03 0.00
 12 18 14 -2.25 0.00
 12 18 16 5.08 0.00
 12 18 18 3.31 0.00
 12 18 20 -1.72 0.00
 12 18 22 -3.16 0.00
 12 18 24 8.51 0.00
 12 20 0 -7.95 0.00
 12 20 2 5.27 0.00
 12 20 4 -3.08 0.00
 12 20 6 -0.78 0.00
 12 20 8 6.05 0.00
 12 20 10 -7.34 0.00
 12 20 12 -3.39 0.00
 12 20 14 -6.03 0.00
 12 20 16 -8.38 0.00
 12 20 18 -8.13 0.00
 12 20 20 -13.91 0.00
 12 20 22 -2.55 0.00
 12 22 0 8.49 0.00
 12 22 2 25.15 0.00
 12 22 4 7.20 0.00
 12 22 6 0.73 0.00
 12 22 8 2.19 0.00
 12 22 10 -5.94 0.00
 12 22 12 -1.86 0.00
 12 22 14 -5.14 0.00
 12 22 16 -4.77 0.00
 12 22 18 18.07 0.00
 12 24 0 -4.70 0.00
 12 24 2 -1.79 0.00
 12 24 4 -7.68 0.00
 12 24 6 -1.97 0.00
 12 24 8 -1.13 0.00
 12 24 10 -3.51 0.00
 12 24 12 -9.25 0.00
 12 24 14 -6.15 0.00
 13 1 1 -3.02 0.00
 13 1 3 -2.44 0.00
 13 1 5 1.44 0.00
 13 1 7 20.50 0.00
 13 1 9 12.22 0.00
 13 1 11 5.98 0.00
 13 1 13 -7.78 0.00
 13 1 15 -16.28 0.00
 13 1 17 -15.45 0.00
 13 1 19 -6.42 0.00
 13 1 21 -0.56 0.00
 13 1 23 -3.87 0.00
 13 1 25 -5.67 0.00
 13 1 27 -2.47 0.00
 13 1 29 1.82 0.00
 13 1 31 11.03 0.00
 13 1 33 1.82 0.00
 13 3 1 -3.38 0.00
 13 3 3 7.13 0.00
 13 3 5 2.14 0.00
 13 3 7 5.86 0.00
 13 3 9 -3.31 0.00
 13 3 11 -0.77 0.00
 13 3 13 0.71 0.00
 13 3 15 -3.88 0.00
 13 3 17 -1.85 0.00
 13 3 19 -0.11 0.00
 13 3 21 6.06 0.00
 13 3 23 0.34 0.00
 13 3 25 -1.01 0.00
 13 3 27 -0.36 0.00
 13 3 29 0.56 0.00
 13 3 31 0.63 0.00
 13 3 33 -3.63 0.00
 13 5 1 0.89 0.00
 13 5 3 9.33 0.00
 13 5 5 -2.19 0.00
 13 5 7 -4.66 0.00
 13 5 9 -2.68 0.00
 13 5 11 -4.55 0.00
 13 5 13 -13.97 0.00
 13 5 15 -4.98 0.00
 13 5 17 -3.35 0.00
 13 5 19 1.49 0.00
 13 5 21 10.38 0.00
 13 5 23 -1.34 0.00
 13 5 25 -3.41 0.00
 13 5 27 -9.26 0.00
 13 5 29 -0.27 0.00
 13 5 31 -5.55 0.00
 13 5 33 -4.97 0.00
 13 7 1 2.42 0.00
 13 7 3 10.06 0.00
 13 7 5 10.15 0.00
 13 7 7 1.62 0.00
 13 7 9 3.11 0.00
 13 7 11 14.46 0.00
 13 7 13 -1.54 0.00
 13 7 15 3.22 0.00
 13 7 17 -1.40 0.00
 13 7 19 4.06 0.00
 13 7 21 4.28 0.00
 13 7 23 -3.65 0.00
 13 7 25 -2.97 0.00
 13 7 27 -5.18 0.00
 13 7 29 1.60 0.00
 13 7 31 -3.39 0.00
 13 7 33 -7.16 0.00
 13 9 1 -4.69 0.00
 13 9 3 0.78 0.00
 13 9 5 6.07 0.00
 13 9 7 1.89 0.00
 13 9 9 -8.49 0.00
 13 9 11 7.06 0.00
 13 9 13 0.35 0.00
 13 9 15 2.39 0.00
 13 9 17 -4.62 0.00
 13 9 19 2.16 0.00
 13 9 21 10.74 0.00
 13 9 23 10.61 0.00
 13 9 25 -8.63 0.00
 13 9 27 -10.25 0.00
 13 9 29 0.48 0.00
 13 9 31 5.98 0.00
 13 11 1 -7.58 0.00
 13 11 3 -7.57 0.00
 13 11 5 -0.77 0.00
 13 11 7 5.52 0.00
 13 11 9 2.90 0.00
 13 11 11 5.77 0.00
 13 11 13 -0.03 0.00
 13 11 15 4.06 0.00
 13 11 17 0.13 0.00
 13 11 19 -2.22 0.00
 13 11 21 -1.28 0.00
 13 11 23 -1.78 0.00
 13 11 25 -6.15 0.00
 13 11 27 -1.83 0.00
 13 11 29 -3.16 0.00
 13 11 31 8.00 0.00
 13 13 1 -6.09 0.00
 13 13 3 -5.94 0.00
 13 13 5 6.09 0.00
 13 13 7 7.77 0.00
 13 13 9 8.20 0.00
 13 13 11 3.02 0.00
 13 13 13 -1.64 0.00
 13 13 15 -0.39 0.00
 13 13 17 7.04 0.00
 13 13 19 -7.17 0.00
 13 13 21 4.62 0.00
 13 13 23 8.82 0.00
 13 13 25 0.82 0.00
 13 13 27 9.91 0.00
 13 13 29 9.38 0.00
 13 15 1 3.17 0.00
 13 15 3 2.79 0.00
 13 15 5 -0.56 0.00
 13 15 7 -2.02 0.00
 13 15 9 -2.76 0.00
 13 15 11 -5.46 0.00
 13 15 13 -0.21 0.00
 13 15 15 -5.20 0.00
 13 15 17 1.71 0.00
 13 15 19 -20.74 0.00
 13 15 21 -0.96 0.00
 13 15 23 10.37 0.00
 13 15 25 1.82 0.00
 13 15 27 14.97 0.00
 13 17 1 -6.70 0.00
 13 17 3 -3.70 0.00
 13 17 5 -4.99 0.00
 13 17 7 -6.60 0.00
 13 17 9 -6.63 0.00
 13 17 11 -4.73 0.00
 13 17 13 4.98 0.00
 13 17 15 2.80 0.00
 13 17 17 4.42 0.00
 13 17 19 2.69 0.00
 13 17 21 9.11 0.00
 13 17 23 3.14 0.00
 13 19 1 -0.15 0.00
 13 19 3 -1.01 0.00
 13 19 5 -0.52 0.00
 13 19 7 -2.16 0.00
 13 19 9 3.99 0.00
 13 19 11 2.14 0.00
 13 19 13 -3.41 0.00
 13 19 15 -1.53 0.00
 13 19 17 -6.34 0.00
 13 19 19 -0.50 0.00
 13 21 1 0.90 0.00
 13 21 3 9.87 0.00
 13 21 5 6.41 0.00
 13 21 7 -5.38 0.00
 13 21 9 -7.03 0.00
 13 21 11 -7.54 0.00
 13 21 13 -8.09 0.00
 13 21 15 -7.96 0.00
 13 21 17 0.28 0.00
 13 23 1 -15.46 0.00
 13 23 3 -11.87 0.00
 13 23 5 -1.72 0.00
 13 23 7 -19.70 0.00
 13 23 9 -12.47 0.00
 13 23 11 16.57 0.00
 14 0 0 8.87 0.00
 14 0 2 -5.19 0.00
 14 0 4 6.75 0.00
 14 0 6 -0.08 0.00
 14 0 8 -16.11 0.00
 14 0 10 -7.84 0.00
 14 0 12 -0.92 0.00
 14 0 14 -12.36 0.00
 14 0 16 -2.41 0.00
 14 0 18 0.32 0.00
 14 0 20 9.07 0.00
 14 0 22 -7.21 0.00
 14 0 24 -8.30 0.00
 14 0 26 1.47 0.00
 14 0 28 10.00 0.00
 14 0 30 19.10 0.00
 14 2 0 14.70 0.00
 14 2 2 2.79 0.00
 14 2 4 4.61 0.00
 14 2 6 -1.54 0.00
 14 2 8 -8.75 0.00
 14 2 10 -7.23 0.00
 14 2 12 1.61 0.00
 14 2 14 -2.97 0.00
 14 2 16 8.25 0.00
 14 2 18 11.26 0.00
 14 2 20 5.64 0.00
 14 2 22 -5.62 0.00
 14 2 24 -5.60 0.00
 14 2 26 2.56 0.00
 14 2 28 8.54 0.00
 14 2 30 11.96 0.00
 14 4 0 -1.86 0.00
 14 4 2 -5.81 0.00
 14 4 4 -4.60 0.00
 14 4 6 0.63 0.00
 14 4 8 2.80 0.00
 14 4 10 -5.88 0.00
 14 4 12 -5.88 0.00
 14 4 14 -3.19 0.00
 14 4 16 2.08 0.00
 14 4 18 0.88 0.00
 14 4 20 -8.29 0.00
 14 4 22 -1.54 0.00
 14 4 24 -1.39 0.00
 14 4 26 2.38 0.00
 14 4 28 3.51 0.00
 14 4 30 3.20 0.00
 14 6 0 1.22 0.00
 14 6 2 -2.44 0.00
 14 6 4 -4.49 0.00
 14 6 6 4.00 0.00
 14 6 8 -0.80 0.00
 14 6 10 -2.62 0.00
 14 6 12 -7.10 0.00
 14 6 14 0.05 0.00
 14 6 16 7.60 0.00
 14 6 18 7.38 0.00
 14 6 20 -1.37 0.00
 14 6 22 -0.31 0.00
 14 6 24 -6.34 0.00
 14 6 26 -2.01 0.00
 14 6 28 -6.14 0.00
 14 6 30 -2.53 0.00
 14 8 0 -11.27 0.00
 14 8 2 -2.80 0.00
 14 8 4 -0.08 0.00
 14 8 6 2.91 0.00
 14 8 8 -6.65 0.00
 14 8 10 -2.95 0.00
 14 8 12 -3.33 0.00
 14 8 14 -0.42 0.00
 14 8 16 4.29 0.00
 14 8 18 7.18 0.00
 14 8 20 -1.83 0.00
 14 8 22 -2.02 0.00
 14 8 24 -2.68 0.00
 14 8 26 11.19 0.00
 14 8 28 0.73 0.00
 14 8 30 -5.39 0.00
 14 10 0 6.45 0.00
 14 10 2 7.51 0.00
 14 10 4 -1.78 0.00
 14 10 6 -7.14 0.00
 14 10 8 -2.73 0.00
 14 10 10 1.05 0.00
 14 10 12 1.51 0.00
 14 10 14 5.30 0.00
 14 10 16 -1.71 0.00
 14 10 18 -1.58 0.00
 14 10 20 -0.71 0.00
 14 10 22 -6.67 0.00
 14 10 24 -6.96 0.00
 14 10 26 6.51 0.00
 14 10 28 -7.88 0.00
 14 12 0 9.45 0.00
 14 12 2 3.57 0.00
 14 12 4 4.85 0.00
 14 12 6 -2.06 0.00
 14 12 8 -2.38 0.00
 14 12 10 3.90 0.00
 14 12 12 -3.10 0.00
 14 12 14 -7.37 0.00
 14 12 16 -1.20 0.00
 14 12 18 1.14 0.00
 14 12 20 11.32 0.00
 14 12 22 -2.82 0.00
 14 12 24 -2.04 0.00
 14 12 26 4.05 0.00
 14 14 0 1.20 0.00
 14 14 2 -1.13 0.00
 14 14 4 5.23 0.00
 14 14 6 -1.41 0.00
 14 14 8 -3.00 0.00
 14 14 10 5.11 0.00
 14 14 12 -2.97 0.00
 14 14 14 -11.87 0.00
 14 14 16 13.49 0.00
 14 14 18 -1.35 0.00
 14 14 20 5.20 0.00
 14 14 22 9.38 0.00
 14 14 24 7.24 0.00
 14 16 0 -6.37 0.00
 14 16 2 -2.74 0.00
 14 16 4 6.12 0.00
 14 16 6 -0.95 0.00
 14 16 8 -8.66 0.00
 14 16 10 -0.55 0.00
 14 16 12 5.74 0.00
 14 16 14 -1.94 0.00
 14 16 16 8.47 0.00
 14 16 18 0.55 0.00
 14 16 20 10.83 0.00
 14 18 0 -1.78 0.00
 14 18 2 -5.87 0.00
 14 18 4 1.44 0.00
 14 18 6 5.81 0.00
 14 18 8 0.14 0.00
 14 18 10 2.46 0.00
 14 18 12 1.98 0.00
 14 18 14 9.24 0.00
 14 18 16 12.48 0.00
 14 18 18 6.21 0.00
 14 20 0 6.30 0.00
 14 20 2 6.18 0.00
 14 20 4 -0.11 0.00
 14 20 6 -2.03 0.00
 14 20 8 3.63 0.00
 14 20 10 0.15 0.00
 14 20 12 -6.00 0.00
 14 20 14 7.73 0.00
 14 22 0 -10.50 0.00
 14 22 2 -8.97 0.00
 14 22 4 -10.67 0.00
 14 22 6 2.69 0.00
 15 1 1 2.93 0.00
 15 1 3 -14.99 0.00
 15 1 5 -1.54 0.00
 15 1 7 2.82 0.00
 15 1 9 -4.55 0.00
 15 1 11 -3.12 0.00
 15 1 13 1.05 0.00
 15 1 15 13.94 0.00
 15 1 17 5.77 0.00
 15 1 19 5.77 0.00
 15 1 21 0.92 0.00
 15 1 23 5.56 0.00
 15 1 25 17.29 0.00
 15 1 27 24.56 0.00
 15 3 1 2.05 0.00
 15 3 3 3.43 0.00
 15 3 5 0.79 0.00
 15 3 7 -4.75 0.00
 15 3 9 -5.61 0.00
 15 3 11 -0.94 0.00
 15 3 13 10.08 0.00
 15 3 15 2.98 0.00
 15 3 17 -0.54 0.00
 15 3 19 1.69 0.00
 15 3 21 -11.17 0.00
 15 3 23 -1.43 0.00
 15 3 25 7.85 0.00
 15 3 27 19.37 0.00
 15 5 1 2.74 0.00
 15 5 3 1.30 0.00
 15 5 5 2.23 0.00
 15 5 7 -3.15 0.00
 15 5 9 1.93 0.00
 15 5 11 3.25 0.00
 15 5 13 6.27 0.00
 15 5 15 -1.14 0.00
 15 5 17 0.80 0.00
 15 5 19 1.64 0.00
 15 5 21 -1.34 0.00
 15 5 23 -2.38 0.00
 15 5 25 1.27 0.00
 15 5 27 10.55 0.00
 15 7 1 4.23 0.00
 15 7 3 -10.51 0.00
 15 7 5 -4.29 0.00
 15 7 7 -3.19 0.00
 15 7 9 4.01 0.00
 15 7 11 6.74 0.00
 15 7 13 -5.63 0.00
 15 7 15 -3.41 0.00
 15 7 17 5.76 0.00
 15 7 19 -1.99 0.00
 15 7 21 -0.25 0.00
 15 7 23 -2.26 0.00
 15 7 25 14.23 0.00
 15 7 27 11.83 0.00
 15 9 1 6.66 0.00
 15 9 3 0.04 0.00
 15 9 5 0.45 0.00
 15 9 7 -4.24 0.00
 15 9 9 -6.19 0.00
 15 9 11 -8.01 0.00
 15 9 13 -5.08 0.00
 15 9 15 1.78 0.00
 15 9 17 1.98 0.00
 15 9 19 -5.18 0.00
 15 9 21 -6.44 0.00
 15 9 23 -10.70 0.00
 15 9 25 -6.75 0.00
 15 11 1 2.98 0.00
 15 11 3 -6.37 0.00
 15 11 5 -5.75 0.00
 15 11 7 -4.21 0.00
 15 11 9 -2.44 0.00
 15 11 11 -3.41 0.00
 15 11 13 3.41 0.00
 15 11 15 -2.37 0.00
 15 11 17 -0.42 0.00
 15 11 19 -1.22 0.00
 15 11 21 -17.51 0.00
 15 11 23 -9.80 0.00
 15 13 1 0.51 0.00
 15 13 3 10.28 0.00
 15 13 5 10.12 0.00
 15 13 7 -4.67 0.00
 15 13 9 -3.08 0.00
 15 13 11 9.39 0.00
 15 13 13 1.51 0.00
 15 13 15 -13.20 0.00
 15 13 17 15.90 0.00
 15 13 19 8.25 0.00
 15 13 21 -2.47 0.00
 15 15 1 2.08 0.00
 15 15 3 -1.99 0.00
 15 15 5 2.13 0.00
 15 15 7 -1.21 0.00
 15 15 9 4.46 0.00
 15 15 11 1.91 0.00
 15 15 13 -2.17 0.00
 15 15 15 -13.57 0.00
 15 15 17 0.78 0.00
 15 17 1 6.40 0.00
 15 17 3 -19.31 0.00
 15 17 5 0.14 0.00
 15 17 7 2.29 0.00
 15 17 9 15.41 0.00
 15 17 11 6.21 0.00
 15 17 13 6.01 0.00
 15 17 15 8.32 0.00
 15 19 1 15.57 0.00
 15 19 3 7.11 0.00
 15 19 5 20.89 0.00
 15 19 7 4.13 0.00
 15 19 9 1.44 0.00
 15 19 11 -2.97 0.00
 16 0 0 10.82 0.00
 16 0 2 -3.52 0.00
 16 0 4 1.70 0.00
 16 0 6 4.47 0.00
 16 0 8 -3.82 0.00
 16 0 10 8.05 0.00
 16 0 12 2.03 0.00
 16 0 14 -3.03 0.00
 16 0 16 -3.66 0.00
 16 0 18 -7.39 0.00
 16 0 20 4.09 0.00
 16 0 22 11.31 0.00
 16 2 0 2.68 0.00
 16 2 2 3.42 0.00
 16 2 4 5.53 0.00
 16 2 6 3.97 0.00
 16 2 8 1.81 0.00
 16 2 10 2.15 0.00
 16 2 12 0.38 0.00
 16 2 14 1.64 0.00
 16 2 16 -6.32 0.00
 16 2 18 -4.10 0.00
 16 2 20 -1.84 0.00
 16 2 22 2.08 0.00
 16 2 24 9.66 0.00
 16 4 0 2.67 0.00
 16 4 2 9.78 0.00
 16 4 4 -3.97 0.00
 16 4 6 -16.83 0.00
 16 4 8 3.85 0.00
 16 4 10 2.71 0.00
 16 4 12 4.70 0.00
 16 4 14 6.88 0.00
 16 4 16 -7.64 0.00
 16 4 18 0.41 0.00
 16 4 20 5.69 0.00
 16 4 22 -0.22 0.00
 16 4 24 15.41 0.00
 16 6 0 2.07 0.00
 16 6 2 4.00 0.00
 16 6 4 6.14 0.00
 16 6 6 -4.33 0.00
 16 6 8 8.31 0.00
 16 6 10 -2.05 0.00
 16 6 12 -4.71 0.00
 16 6 14 -7.13 0.00
 16 6 16 -1.00 0.00
 16 6 18 2.97 0.00
 16 6 20 6.24 0.00
 16 6 22 -0.89 0.00
 16 6 24 21.94 0.00
 16 8 0 -2.85 0.00
 16 8 2 -0.86 0.00
 16 8 4 18.08 0.00
 16 8 6 -2.84 0.00
 16 8 8 1.62 0.00
 16 8 10 10.86 0.00
 16 8 12 10.75 0.00
 16 8 14 -3.31 0.00
 16 8 16 -5.37 0.00
 16 8 18 -3.14 0.00
 16 8 20 -0.99 0.00
 16 8 22 -4.87 0.00
 16 10 0 -3.92 0.00
 16 10 2 -8.95 0.00
 16 10 4 6.21 0.00
 16 10 6 -0.75 0.00
 16 10 8 2.83 0.00
 16 10 10 2.55 0.00
 16 10 12 1.15 0.00
 16 10 14 15.45 0.00
 16 10 16 1.09 0.00
 16 10 18 -9.18 0.00
 16 10 20 9.56 0.00
 16 12 0 0.79 0.00
 16 12 2 -1.28 0.00
 16 12 4 -4.59 0.00
 16 12 6 1.10 0.00
 16 12 8 2.21 0.00
 16 12 10 -1.68 0.00
 16 12 12 -1.82 0.00
 16 12 14 -2.68 0.00
 16 12 16 17.76 0.00
 16 12 18 3.89 0.00
 16 14 0 -9.74 0.00
 16 14 2 -0.40 0.00
 16 14 4 -5.51 0.00
 16 14 6 -3.96 0.00
 16 14 8 -1.99 0.00
 16 14 10 -5.83 0.00
 16 14 12 4.57 0.00
 16 14 14 -30.83 0.00
 16 16 0 -0.85 0.00
 16 16 2 -4.05 0.00
 16 16 4 -0.36 0.00
 16 16 6 -7.23 0.00
 16 16 8 -7.53 0.00
 16 16 10 -1.36 0.00
 17 1 1 -1.88 0.00
 17 1 3 -3.40 0.00
 17 1 5 0.90 0.00
 17 1 7 -3.77 0.00
 17 1 9 6.26 0.00
 17 1 11 0.33 0.00
 17 1 13 1.02 0.00
 17 1 15 -14.33 0.00
 17 1 17 -7.97 0.00
 17 1 19 -7.41 0.00
 17 3 1 -6.86 0.00
 17 3 3 1.68 0.00
 17 3 5 -2.66 0.00
 17 3 7 1.58 0.00
 17 3 9 1.55 0.00
 17 3 11 -0.05 0.00
 17 3 13 3.01 0.00
 17 3 15 -7.17 0.00
 17 3 17 -7.33 0.00
 17 3 19 -0.33 0.00
 17 5 1 -6.84 0.00
 17 5 3 -2.91 0.00
 17 5 5 -6.10 0.00
 17 5 7 5.66 0.00
 17 5 9 -2.27 0.00
 17 5 11 -0.47 0.00
 17 5 13 -3.96 0.00
 17 5 15 0.74 0.00
 17 5 17 -4.70 0.00
 17 5 19 -4.91 0.00
 17 7 1 -2.21 0.00
 17 7 3 -6.10 0.00
 17 7 5 -2.10 0.00
 17 7 7 1.61 0.00
 17 7 9 -10.78 0.00
 17 7 11 -0.08 0.00
 17 7 13 -8.01 0.00
 17 7 15 -0.61 0.00
 17 7 17 2.07 0.00
 17 9 1 -3.65 0.00
 17 9 3 -1.06 0.00
 17 9 5 3.58 0.00
 17 9 7 2.02 0.00
 17 9 9 2.63 0.00
 17 9 11 6.18 0.00
 17 9 13 -1.80 0.00
 17 9 15 -5.81 0.00
 17 9 17 -2.21 0.00
 17 11 1 1.09 0.00
 17 11 3 3.67 0.00
 17 11 5 -4.61 0.00
 17 11 7 5.09 0.00
 17 11 9 4.53 0.00
 17 11 11 5.78 0.00
 17 11 13 3.26 0.00
 17 13 1 -8.25 0.00
 17 13 3 14.60 0.00
 17 13 5 -9.58 0.00
 17 13 7 -0.46 0.00
 17 13 9 -13.06 0.00
 18 0 2 -6.15 0.00
 18 0 4 -14.86 0.00
 18 0 6 14.54 0.00
 18 0 8 -6.44 0.00
 18 0 10 1.50 0.00
 18 0 12 -5.92 0.00
 18 2 0 -4.99 0.00
 18 2 2 -11.00 0.00
 18 2 4 -4.62 0.00
 18 2 6 20.24 0.00
 18 2 8 -4.52 0.00
 18 2 10 -0.78 0.00
 18 2 12 0.46 0.00
 18 4 0 -6.52 0.00
 18 4 2 1.53 0.00
 18 4 4 3.33 0.00
 18 4 6 5.87 0.00
 18 4 8 -2.02 0.00
 18 4 10 6.89 0.00
 18 4 12 4.64 0.00
 18 6 0 -5.03 0.00
 18 6 2 0.67 0.00
 18 6 4 9.12 0.00
 18 6 6 2.28 0.00
 18 6 8 -1.19 0.00
 18 6 10 2.24 0.00
 18 6 12 -3.75 0.00
 18 8 0 -4.07 0.00
 18 8 2 -5.67 0.00
 18 8 4 8.14 0.00
 18 8 6 2.32 0.00
 18 8 8 5.38 0.00
 18 8 10 14.52 0.00
 18 10 0 6.47 0.00
 18 10 2 0.53 0.00
 18 10 4 -3.46 0.00
 18 0 0 21.90 0.00
 0 2 0 551.28 0.00
 18 12 0 -9.51 0.00
 18 14 0 -10.49 0.00
 18 16 0 -7.44 0.00
 16 18 0 20.31 0.00
 18 18 0 12.80 0.00
 16 20 0 8.24 0.00
 16 22 0 10.02 0.00
 14 24 0 18.18 0.00
 16 24 0 2.62 0.00
 12 26 0 5.60 0.00
 14 26 0 -3.11 0.00
 8 28 0 12.18 0.00
 10 28 0 -2.50 0.00
 12 28 0 -5.66 0.00
 8 30 0 6.34 0.00
 10 30 0 19.65 0.00
 12 30 0 -5.22 0.00
 6 32 0 3.27 0.00
 8 32 0 -2.46 0.00
 10 32 0 -9.51 0.00
 17 15 1 -4.18 0.00
 17 17 1 1.29 0.00
 17 19 1 -0.92 0.00
 15 21 1 -24.78 0.00
 17 21 1 -12.19 0.00
 15 23 1 13.07 0.00
 13 25 1 0.56 0.00
 15 25 1 -0.50 0.00
 11 27 1 -19.02 0.00
 13 27 1 -2.97 0.00
 9 29 1 -13.59 0.00
 11 29 1 7.86 0.00
 13 29 1 12.36 0.00
 7 31 1 10.86 0.00
 9 31 1 -0.47 0.00
 11 31 1 -12.92 0.00
 1 33 1 19.80 0.00
 5 33 1 -2.49 0.00
 7 33 1 0.96 0.00
 9 33 1 6.98 0.00
 0 0 2 361.28 0.00
 18 12 2 8.02 0.00
 18 14 2 4.02 0.00
 18 16 2 -11.95 0.00
 16 18 2 -6.53 0.00
 18 18 2 -3.15 0.00
 16 20 2 -4.12 0.00
 16 22 2 1.07 0.00
 14 24 2 3.93 0.00
 16 24 2 -2.65 0.00
 12 26 2 9.57 0.00
 14 26 2 -5.14 0.00
 10 28 2 -6.35 0.00
 12 28 2 -0.88 0.00
 8 30 2 -8.37 0.00
 10 30 2 10.94 0.00
 12 30 2 -7.22 0.00
 6 32 2 4.83 0.00
 8 32 2 -13.96 0.00
 10 32 2 -12.35 0.00
 17 15 3 20.50 0.00
 17 17 3 2.66 0.00
 17 19 3 14.21 0.00
 15 21 3 -2.54 0.00
 17 21 3 1.91 0.00
 15 23 3 14.81 0.00
 13 25 3 -4.93 0.00
 15 25 3 -7.49 0.00
 11 27 3 10.91 0.00
 13 27 3 -0.42 0.00
 9 29 3 7.58 0.00
 11 29 3 23.97 0.00
 13 29 3 -1.68 0.00
 7 31 3 -0.28 0.00
 9 31 3 4.63 0.00
 11 31 3 1.87 0.00
 5 33 3 9.93 0.00
 7 33 3 2.17 0.00
 9 33 3 1.13 0.00
 18 12 4 6.72 0.00
 18 14 4 -7.58 0.00
 18 16 4 -9.91 0.00
 16 18 4 -13.57 0.00
 18 18 4 -9.91 0.00
 16 20 4 -4.85 0.00
 16 22 4 -4.52 0.00
 14 24 4 1.61 0.00
 16 24 4 3.56 0.00
 12 26 4 0.45 0.00
 14 26 4 4.09 0.00
 10 28 4 -18.95 0.00
 12 28 4 -2.91 0.00
 8 30 4 6.27 0.00
 10 30 4 8.36 0.00
 12 30 4 -4.26 0.00
 6 32 4 -9.39 0.00
 8 32 4 -3.79 0.00
 10 32 4 -9.15 0.00
 17 15 5 15.75 0.00
 17 17 5 4.94 0.00
 17 19 5 18.40 0.00
 15 21 5 -1.42 0.00
 17 21 5 -0.99 0.00
 15 23 5 2.24 0.00
 13 25 5 10.58 0.00
 15 25 5 0.14 0.00
 11 27 5 -15.81 0.00
 13 27 5 -1.42 0.00
 9 29 5 -5.40 0.00
 11 29 5 -3.17 0.00
 13 29 5 -7.00 0.00
 7 31 5 -1.43 0.00
 9 31 5 -1.00 0.00
 11 31 5 -4.60 0.00
 3 33 5 -7.65 0.00
 5 33 5 3.20 0.00
 7 33 5 4.23 0.00
 9 33 5 3.82 0.00
 18 10 6 -16.57 0.00
 18 12 6 7.73 0.00
 18 14 6 -11.38 0.00
 18 16 6 -6.96 0.00
 16 18 6 -14.62 0.00
 18 18 6 -8.70 0.00
 16 20 6 1.32 0.00
 16 22 6 1.80 0.00
 14 24 6 3.47 0.00
 12 26 6 -2.80 0.00
 14 26 6 1.58 0.00
 10 28 6 -9.67 0.00
 12 28 6 1.50 0.00
 8 30 6 4.33 0.00
 10 30 6 16.24 0.00
 12 30 6 -2.97 0.00
 6 32 6 -11.38 0.00
 8 32 6 -2.47 0.00
 10 32 6 -4.87 0.00
 17 15 7 22.51 0.00
 17 17 7 -0.88 0.00
 17 19 7 -1.12 0.00
 15 21 7 -8.31 0.00
 17 21 7 -5.88 0.00
 15 23 7 -10.69 0.00
 13 25 7 1.72 0.00
 15 25 7 5.45 0.00
 11 27 7 4.18 0.00
 13 27 7 -2.99 0.00
 9 29 7 0.10 0.00
 11 29 7 13.83 0.00
 7 31 7 5.20 0.00
 9 31 7 -3.40 0.00
 11 31 7 -6.10 0.00
 3 33 7 -16.13 0.00
 5 33 7 -13.51 0.00
 7 33 7 6.48 0.00
 9 33 7 2.12 0.00
 18 10 8 -20.63 0.00
 18 12 8 5.51 0.00
 18 14 8 -3.48 0.00
 18 16 8 2.44 0.00
 16 18 8 -10.72 0.00
 18 18 8 6.19 0.00
 16 20 8 3.99 0.00
 14 22 8 27.30 0.00
 16 22 8 9.01 0.00
 14 24 8 2.88 0.00
 12 26 8 3.31 0.00
 14 26 8 0.61 0.00
 10 28 8 -10.33 0.00
 12 28 8 3.69 0.00
 8 30 8 1.25 0.00
 10 30 8 10.87 0.00
 12 30 8 -3.62 0.00
 6 32 8 -10.90 0.00
 8 32 8 -7.01 0.00
 10 32 8 -10.34 0.00
 17 15 9 -4.65 0.00
 17 17 9 -4.16 0.00
 17 19 9 1.11 0.00
 15 21 9 -12.81 0.00
 17 21 9 3.22 0.00
 15 23 9 -27.52 0.00
 13 25 9 1.36 0.00
 15 25 9 2.80 0.00
 11 27 9 -11.20 0.00
 13 27 9 -5.40 0.00
 9 29 9 -8.57 0.00
 11 29 9 2.74 0.00
 7 31 9 2.88 0.00
 9 31 9 -0.16 0.00
 11 31 9 -4.26 0.00
 1 33 9 -2.71 0.00
 3 33 9 -14.30 0.00
 5 33 9 -22.36 0.00
 7 33 9 -4.09 0.00
 9 33 9 -3.91 0.00
 18 10 10 -5.81 0.00
 18 12 10 9.99 0.00
 18 14 10 5.32 0.00
 18 16 10 -0.44 0.00
 16 18 10 -2.54 0.00
 18 18 10 4.61 0.00
 16 20 10 4.76 0.00
 14 22 10 22.65 0.00
 16 22 10 4.93 0.00
 14 24 10 -0.24 0.00
 12 26 10 9.37 0.00
 14 26 10 12.52 0.00
 10 28 10 -13.58 0.00
 12 28 10 -1.22 0.00
 8 30 10 7.78 0.00
 10 30 10 13.93 0.00
 6 32 10 -1.99 0.00
 8 32 10 1.38 0.00
 10 32 10 -5.71 0.00
 17 13 11 7.90 0.00
 17 15 11 6.16 0.00
 17 17 11 -4.39 0.00
 17 19 11 -4.78 0.00
 15 21 11 6.65 0.00
 15 23 11 0.67 0.00
 13 25 11 0.98 0.00
 15 25 11 7.70 0.00
 11 27 11 -18.25 0.00
 13 27 11 -0.12 0.00
 9 29 11 -12.18 0.00
 11 29 11 -3.44 0.00
 7 31 11 9.62 0.00
 9 31 11 10.86 0.00
 1 33 11 -2.39 0.00
 3 33 11 -3.90 0.00
 5 33 11 -1.97 0.00
 7 33 11 2.36 0.00
 18 8 12 -5.05 0.00
 18 10 12 -12.19 0.00
 18 12 12 -12.89 0.00
 18 14 12 0.46 0.00
 16 16 12 16.45 0.00
 18 16 12 -0.34 0.00
 16 18 12 -11.54 0.00
 16 20 12 -5.55 0.00
 14 22 12 2.09 0.00
 16 22 12 0.81 0.00
 14 24 12 -26.55 0.00
 12 26 12 1.69 0.00
 14 26 12 -5.43 0.00
 10 28 12 0.80 0.00
 12 28 12 1.42 0.00
 8 30 12 5.90 0.00
 10 30 12 9.85 0.00
 4 32 12 -11.51 0.00
 6 32 12 -10.62 0.00
 8 32 12 6.60 0.00
 17 13 13 -1.79 0.00
 17 15 13 18.57 0.00
 17 17 13 12.45 0.00
 15 19 13 -15.72 0.00
 17 19 13 7.84 0.00
 15 21 13 -10.29 0.00
 13 23 13 39.54 0.00
 15 23 13 5.07 0.00
 13 25 13 2.72 0.00
 11 27 13 1.71 0.00
 13 27 13 12.02 0.00
 9 29 13 -3.18 0.00
 11 29 13 8.68 0.00
 7 31 13 -5.38 0.00
 9 31 13 2.68 0.00
 1 33 13 -6.92 0.00
 3 33 13 6.50 0.00
 5 33 13 17.82 0.00
 7 33 13 -5.66 0.00
 18 0 14 -5.64 0.00
 18 2 14 2.43 0.00
 18 4 14 0.24 0.00
 18 6 14 4.57 0.00
 18 8 14 -2.46 0.00
 18 10 14 18.64 0.00
 18 12 14 -8.88 0.00
 18 14 14 -18.38 0.00
 16 16 14 -20.93 0.00
 18 16 14 -21.60 0.00
 16 18 14 -19.77 0.00
 16 20 14 3.32 0.00
 14 22 14 2.02 0.00
 16 22 14 4.03 0.00
 14 24 14 -9.68 0.00
 12 26 14 -13.69 0.00
 14 26 14 2.37 0.00
 10 28 14 -0.44 0.00
 12 28 14 -4.33 0.00
 8 30 14 -9.39 0.00
 10 30 14 -11.79 0.00
 0 32 14 12.18 0.00
 2 32 14 -0.72 0.00
 4 32 14 -18.45 0.00
 6 32 14 -6.64 0.00
 8 32 14 0.97 0.00
 17 11 15 -5.08 0.00
 17 13 15 -10.96 0.00
 17 15 15 17.85 0.00
 17 17 15 15.63 0.00
 15 19 15 -1.44 0.00
 17 19 15 17.01 0.00
 15 21 15 -5.58 0.00
 13 23 15 17.17 0.00
 15 23 15 7.00 0.00
 13 25 15 -16.98 0.00
 9 27 15 10.20 0.00
 11 27 15 -7.15 0.00
 13 27 15 5.20 0.00
 9 29 15 6.82 0.00
 11 29 15 7.25 0.00
 5 31 15 -4.20 0.00
 7 31 15 2.13 0.00
 9 31 15 -7.59 0.00
 1 33 15 -7.14 0.00
 3 33 15 9.93 0.00
 5 33 15 11.44 0.00
 7 33 15 -4.36 0.00
 18 0 16 36.77 0.00
 18 2 16 25.95 0.00
 18 4 16 -0.46 0.00
 18 6 16 12.17 0.00
 18 8 16 -1.59 0.00
 18 10 16 6.88 0.00
 18 12 16 1.74 0.00
 16 14 16 15.95 0.00
 18 14 16 6.27 0.00
 16 16 16 15.96 0.00
 16 18 16 1.04 0.00
 14 20 16 7.68 0.00
 16 20 16 5.66 0.00
 14 22 16 -5.39 0.00
 12 24 16 1.17 0.00
 14 24 16 0.94 0.00
 10 26 16 -22.76 0.00
 12 26 16 -9.15 0.00
 8 28 16 -5.19 0.00
 10 28 16 19.64 0.00
 12 28 16 4.60 0.00
 6 30 16 -4.48 0.00
 8 30 16 0.19 0.00
 10 30 16 0.24 0.00
 0 32 16 22.94 0.00
 2 32 16 11.28 0.00
 4 32 16 -14.30 0.00
 6 32 16 -1.85 0.00
 8 32 16 7.78 0.00
 17 11 17 -10.50 0.00
 17 13 17 0.51 0.00
 17 15 17 9.73 0.00
 15 17 17 -0.24 0.00
 17 17 17 -4.56 0.00
 15 19 17 -23.22 0.00
 15 21 17 -5.85 0.00
 13 23 17 4.76 0.00
 15 23 17 2.42 0.00
 11 25 17 24.43 0.00
 13 25 17 -13.25 0.00
 9 27 17 -13.60 0.00
 11 27 17 -8.65 0.00
 7 29 17 -1.37 0.00
 9 29 17 9.87 0.00
 11 29 17 8.83 0.00
 3 31 17 -8.86 0.00
 5 31 17 14.77 0.00
 7 31 17 0.04 0.00
 9 31 17 -3.94 0.00
 1 33 17 -8.15 0.00
 3 33 17 11.19 0.00
 5 33 17 15.77 0.00
 7 33 17 -6.89 0.00
 18 0 18 2.39 0.00
 18 2 18 0.77 0.00
 18 4 18 -3.31 0.00
 18 6 18 11.73 0.00
 18 8 18 5.04 0.00
 18 10 18 -4.53 0.00
 18 12 18 5.06 0.00
 16 14 18 -22.08 0.00
 18 14 18 -0.57 0.00
 16 16 18 6.12 0.00
 16 18 18 11.23 0.00
 14 20 18 -1.37 0.00
 16 20 18 8.83 0.00
 14 22 18 -6.40 0.00
 12 24 18 9.87 0.00
 14 24 18 7.24 0.00
 10 26 18 -3.98 0.00
 12 26 18 -1.96 0.00
 8 28 18 -3.44 0.00
 10 28 18 1.03 0.00
 6 30 18 2.90 0.00
 8 30 18 -1.63 0.00
 10 30 18 -6.12 0.00
 0 32 18 19.94 0.00
 2 32 18 8.59 0.00
 4 32 18 -4.93 0.00
 6 32 18 0.28 0.00
 8 32 18 -2.55 0.00
 17 7 19 -4.54 0.00
 17 9 19 2.36 0.00
 17 11 19 -3.67 0.00
 17 13 19 2.51 0.00
 15 15 19 -28.96 0.00
 17 15 19 -14.93 0.00
 15 17 19 -12.19 0.00
 17 17 19 -12.31 0.00
 15 19 19 -15.56 0.00
 13 21 19 15.23 0.00
 15 21 19 8.47 0.00
 13 23 19 -3.63 0.00
 11 25 19 20.02 0.00
 13 25 19 -5.13 0.00
 9 27 19 -9.45 0.00
 11 27 19 -2.91 0.00
 7 29 19 3.53 0.00
 9 29 19 7.76 0.00
 1 31 19 -4.45 0.00
 3 31 19 -10.83 0.00
 5 31 19 -11.06 0.00
 7 31 19 -6.95 0.00
 9 31 19 -1.31 0.00
 1 33 19 -12.39 0.00
 3 33 19 8.47 0.00
 5 33 19 -2.64 0.00
 18 0 20 4.96 0.00
 18 2 20 -3.78 0.00
 18 4 20 2.08 0.00
 18 6 20 -0.23 0.00
 18 8 20 -1.87 0.00
 18 10 20 -1.23 0.00
 16 12 20 15.55 0.00
 18 12 20 17.15 0.00
 16 14 20 -8.80 0.00
 16 16 20 21.37 0.00
 14 18 20 8.73 0.00
 16 18 20 14.10 0.00
 14 20 20 -1.89 0.00
 12 22 20 7.99 0.00
 14 22 20 -13.12 0.00
 10 24 20 -26.66 0.00
 12 24 20 -14.84 0.00
 14 24 20 0.22 0.00
 10 26 20 13.09 0.00
 12 26 20 1.18 0.00
 8 28 20 8.87 0.00
 10 28 20 -3.57 0.00
 0 30 20 0.17 0.00
 4 30 20 3.43 0.00
 6 30 20 3.39 0.00
 8 30 20 3.62 0.00
 0 32 20 -2.66 0.00
 2 32 20 0.75 0.00
 4 32 20 -0.15 0.00
 6 32 20 1.39 0.00
 17 1 21 9.82 0.00
 17 3 21 2.02 0.00
 17 5 21 3.30 0.00
 17 7 21 4.86 0.00
 17 9 21 -3.41 0.00
 17 11 21 -21.64 0.00
 17 13 21 -7.99 0.00
 15 15 21 -8.62 0.00
 17 15 21 0.45 0.00
 15 17 21 -4.83 0.00
 13 19 21 2.41 0.00
 15 19 21 0.08 0.00
 13 21 21 18.19 0.00
 15 21 21 6.91 0.00
 11 23 21 -6.46 0.00
 13 23 21 -7.43 0.00
 9 25 21 -28.67 0.00
 11 25 21 -5.91 0.00
 13 25 21 5.59 0.00
 9 27 21 1.52 0.00
 11 27 21 1.96 0.00
 5 29 21 3.05 0.00
 7 29 21 6.72 0.00
 9 29 21 0.91 0.00
 1 31 21 16.35 0.00
 3 31 21 -4.57 0.00
 5 31 21 -4.70 0.00
 7 31 21 -7.47 0.00
 1 33 21 1.53 0.00
 3 33 21 4.79 0.00
 5 33 21 -1.06 0.00
 18 0 22 10.36 0.00
 18 2 22 -5.75 0.00
 18 4 22 1.57 0.00
 18 6 22 -8.84 0.00
 18 8 22 -4.77 0.00
 16 10 22 31.42 0.00
 18 10 22 2.58 0.00
 16 12 22 9.53 0.00
 16 14 22 9.20 0.00
 14 16 22 -3.74 0.00
 16 16 22 11.22 0.00
 14 18 22 -16.34 0.00
 16 18 22 -6.48 0.00
 14 20 22 -9.44 0.00
 12 22 22 8.37 0.00
 14 22 22 -12.23 0.00
 10 24 22 -10.61 0.00
 12 24 22 -11.00 0.00
 8 26 22 -13.56 0.00
 10 26 22 16.68 0.00
 12 26 22 2.43 0.00
 6 28 22 14.24 0.00
 8 28 22 -0.82 0.00
 10 28 22 -5.42 0.00
 0 30 22 -7.86 0.00
 2 30 22 -7.72 0.00
 4 30 22 2.44 0.00
 6 30 22 8.26 0.00
 8 30 22 -6.60 0.00
 0 32 22 -10.91 0.00
 2 32 22 -8.22 0.00
 4 32 22 4.61 0.00
 6 32 22 5.07 0.00
 17 1 23 -21.60 0.00
 17 3 23 -10.26 0.00
 17 5 23 -7.74 0.00
 17 7 23 -3.39 0.00
 17 9 23 -12.32 0.00
 17 11 23 -9.83 0.00
 15 13 23 -7.15 0.00
 17 13 23 -2.96 0.00
 15 15 23 0.91 0.00
 17 15 23 5.27 0.00
 15 17 23 -1.53 0.00
 13 19 23 1.01 0.00
 15 19 23 13.01 0.00
 13 21 23 9.15 0.00
 11 23 23 16.74 0.00
 13 23 23 -11.30 0.00
 9 25 23 -21.54 0.00
 11 25 23 -6.37 0.00
 7 27 23 3.02 0.00
 9 27 23 18.35 0.00
 11 27 23 3.64 0.00
 1 29 23 -26.21 0.00
 3 29 23 -17.72 0.00
 5 29 23 -8.04 0.00
 7 29 23 4.70 0.00
 9 29 23 6.05 0.00
 1 31 23 -1.76 0.00
 3 31 23 -11.83 0.00
 5 31 23 -7.49 0.00
 7 31 23 -5.21 0.00
 1 33 23 -1.04 0.00
 3 33 23 4.44 0.00
 16 0 24 -12.10 0.00
 18 0 24 -2.13 0.00
 18 2 24 -0.01 0.00
 18 4 24 9.22 0.00
 18 6 24 1.41 0.00
 16 8 24 4.11 0.00
 18 8 24 4.88 0.00
 16 10 24 26.51 0.00
 16 12 24 -4.80 0.00
 16 14 24 6.01 0.00
 14 16 24 -6.90 0.00
 16 16 24 -1.47 0.00
 14 18 24 1.65 0.00
 12 20 24 2.27 0.00
 14 20 24 6.52 0.00
 10 22 24 -26.73 0.00
 12 22 24 4.44 0.00
 14 22 24 6.41 0.00
 10 24 24 -7.97 0.00
 12 24 24 -4.11 0.00
 8 26 24 -19.94 0.00
 10 26 24 -1.44 0.00
 6 28 24 2.76 0.00
 8 28 24 1.84 0.00
 10 28 24 -6.56 0.00
 0 30 24 11.90 0.00
 2 30 24 17.20 0.00
 4 30 24 -5.20 0.00
 6 30 24 -16.27 0.00
 8 30 24 -5.35 0.00
 0 32 24 -4.19 0.00
 2 32 24 7.77 0.00
 4 32 24 7.90 0.00
 17 1 25 16.86 0.00
 17 3 25 10.49 0.00
 17 5 25 -9.47 0.00
 17 7 25 -2.35 0.00
 17 9 25 -14.32 0.00
 15 11 25 10.19 0.00
 17 11 25 0.62 0.00
 15 13 25 -2.49 0.00
 17 13 25 1.13 0.00
 15 15 25 -1.97 0.00
 13 17 25 -9.47 0.00
 15 17 25 -0.26 0.00
 13 19 25 -5.57 0.00
 15 19 25 5.22 0.00
 11 21 25 12.67 0.00
 13 21 25 0.40 0.00
 11 23 25 34.19 0.00
 13 23 25 -1.81 0.00
 9 25 25 -7.98 0.00
 11 25 25 2.91 0.00
 7 27 25 19.31 0.00
 9 27 25 7.27 0.00
 1 29 25 -13.43 0.00
 3 29 25 -23.87 0.00
 5 29 25 -5.33 0.00
 7 29 25 4.02 0.00
 1 31 25 10.20 0.00
 3 31 25 3.86 0.00
 5 31 25 11.02 0.00
 16 0 26 -54.59 0.00
 18 0 26 -9.49 0.00
 16 2 26 -30.47 0.00
 18 2 26 -2.04 0.00
 16 4 26 -33.16 0.00
 18 4 26 2.10 0.00
 16 6 26 -13.21 0.00
 18 6 26 4.70 0.00
 16 8 26 -10.38 0.00
 16 10 26 3.83 0.00
 16 12 26 -13.39 0.00
 14 14 26 -4.62 0.00
 16 14 26 -2.90 0.00
 14 16 26 -11.86 0.00
 16 16 26 -2.26 0.00
 12 18 26 3.49 0.00
 14 18 26 2.91 0.00
 12 20 26 -20.21 0.00
 14 20 26 -7.87 0.00
 10 22 26 -29.32 0.00
 12 22 26 -11.53 0.00
 10 24 26 15.12 0.00
 12 24 26 -10.39 0.00
 8 26 26 4.99 0.00
 10 26 26 13.48 0.00
 0 28 26 -39.29 0.00
 2 28 26 -15.29 0.00
 4 28 26 3.03 0.00
 6 28 26 -4.82 0.00
 8 28 26 6.11 0.00
 0 30 26 6.39 0.00
 2 30 26 6.85 0.00
 4 30 26 -3.72 0.00
 6 30 26 -13.36 0.00
 0 32 26 -8.53 0.00
 2 32 26 -3.54 0.00
 17 1 27 28.15 0.00
 17 3 27 12.61 0.00
 17 5 27 -1.47 0.00
 17 7 27 5.15 0.00
 15 9 27 -7.77 0.00
 17 9 27 1.89 0.00
 15 11 27 9.10 0.00
 17 11 27 5.28 0.00
 15 13 27 7.68 0.00
 15 15 27 13.19 0.00
 13 17 27 0.61 0.00
 15 17 27 8.10 0.00
 11 19 27 15.54 0.00
 13 19 27 12.56 0.00
 11 21 27 0.74 0.00
 13 21 27 1.89 0.00
 9 23 27 -26.18 0.00
 11 23 27 -5.38 0.00
 7 25 27 -10.68 0.00
 9 25 27 -20.07 0.00
 11 25 27 -12.81 0.00
 5 27 27 23.04 0.00
 7 27 27 5.78 0.00
 9 27 27 -8.17 0.00
 1 29 27 4.39 0.00
 3 29 27 -18.57 0.00
 5 29 27 1.24 0.00
 7 29 27 -9.08 0.00
 1 31 27 4.81 0.00
 3 31 27 2.72 0.00
 16 0 28 -14.67 0.00
 16 2 28 -0.56 0.00
 16 4 28 -1.16 0.00
 16 6 28 2.65 0.00
 16 8 28 -0.37 0.00
 16 10 28 -9.51 0.00
 14 12 28 -10.56 0.00
 16 12 28 -12.86 0.00
 14 14 28 -16.96 0.00
 16 14 28 -3.61 0.00
 14 16 28 -15.31 0.00
 12 18 28 9.16 0.00
 14 18 28 5.15 0.00
 10 20 28 12.69 0.00
 12 20 28 -3.06 0.00
 10 22 28 -1.27 0.00
 12 22 28 9.47 0.00
 8 24 28 -15.19 0.00
 10 24 28 18.09 0.00
 6 26 28 13.57 0.00
 8 26 28 6.70 0.00
 10 26 28 9.77 0.00
 0 28 28 -33.43 0.00
 2 28 28 -18.72 0.00
 4 28 28 -6.29 0.00
 6 28 28 1.53 0.00
 8 28 28 -4.18 0.00
 0 30 28 13.97 0.00
 2 30 28 10.92 0.00
 4 30 28 3.50 0.00
 15 1 29 -44.23 0.00
 17 1 29 10.97 0.00
 15 3 29 -31.06 0.00
 17 3 29 4.43 0.00
 15 5 29 -8.24 0.00
 17 5 29 1.53 0.00
 15 7 29 2.34 0.00
 17 7 29 1.25 0.00
 15 9 29 6.64 0.00
 15 11 29 10.80 0.00
 15 13 29 10.91 0.00
 13 15 29 8.83 0.00
 15 15 29 10.32 0.00
 13 17 29 -17.96 0.00
 11 19 29 -2.75 0.00
 13 19 29 -4.16 0.00
 9 21 29 27.44 0.00
 11 21 29 -4.67 0.00
 13 21 29 -8.34 0.00
 9 23 29 -15.48 0.00
 11 23 29 -10.83 0.00
 7 25 29 -8.05 0.00
 9 25 29 4.47 0.00
 1 27 29 -15.13 0.00
 3 27 29 2.41 0.00
 5 27 29 -4.17 0.00
 7 27 29 3.53 0.00
 9 27 29 0.05 0.00
 1 29 29 10.01 0.00
 3 29 29 -3.03 0.00
 5 29 29 -7.77 0.00
 1 31 29 -4.57 0.00
 16 0 30 24.23 0.00
 16 2 30 14.97 0.00
 16 4 30 3.47 0.00
 16 6 30 -4.39 0.00
 16 8 30 -3.97 0.00
 14 10 30 -10.30 0.00
 16 10 30 -8.50 0.00
 14 12 30 -6.94 0.00
 16 12 30 -2.04 0.00
 14 14 30 -8.01 0.00
 12 16 30 13.44 0.00
 14 16 30 2.21 0.00
 12 18 30 6.82 0.00
 14 18 30 5.46 0.00
 10 20 30 -7.39 0.00
 12 20 30 1.14 0.00
 8 22 30 10.57 0.00
 10 22 30 1.10 0.00
 12 22 30 7.85 0.00
 8 24 30 -6.15 0.00
 10 24 30 10.16 0.00
 0 26 30 0.19 0.00
 2 26 30 6.54 0.00
 4 26 30 8.53 0.00
 6 26 30 15.10 0.00
 8 26 30 12.76 0.00
 0 28 30 1.14 0.00
 2 28 30 0.89 0.00
 4 28 30 -4.92 0.00
 6 28 30 -8.97 0.00
 0 30 30 14.70 0.00
 2 30 30 6.20 0.00
 4 30 30 12.32 0.00
 15 1 31 -7.77 0.00
 17 1 31 -7.57 0.00
 15 3 31 -5.09 0.00
 17 3 31 -4.15 0.00
 15 5 31 1.51 0.00
 15 7 31 -7.08 0.00
 15 9 31 4.72 0.00
 15 11 31 10.65 0.00
 13 13 31 2.36 0.00
 15 13 31 -1.24 0.00
 13 15 31 -2.51 0.00
 11 17 31 11.53 0.00
 13 17 31 -10.04 0.00
 11 19 31 -2.95 0.00
 13 19 31 0.99 0.00
 9 21 31 -4.21 0.00
 11 21 31 -9.58 0.00
 7 23 31 4.69 0.00
 9 23 31 -13.01 0.00
 11 23 31 -3.54 0.00
 5 25 31 -4.97 0.00
 7 25 31 0.17 0.00
 9 25 31 12.14 0.00
 1 27 31 -17.60 0.00
 3 27 31 -7.38 0.00
 5 27 31 -3.26 0.00
 7 27 31 -5.05 0.00
 1 29 31 8.03 0.00
 3 29 31 2.24 0.00
 5 29 31 2.46 0.00
 0 0 32 -24.28 0.00
 14 0 32 -9.70 0.00
 16 0 32 11.44 0.00
 14 2 32 -3.09 0.00
 16 2 32 9.01 0.00
 14 4 32 8.51 0.00
 16 4 32 11.39 0.00
 14 6 32 11.21 0.00
 16 6 32 5.62 0.00
 14 8 32 5.68 0.00
 16 8 32 -0.09 0.00
 14 10 32 7.76 0.00
 14 12 32 9.04 0.00
 12 14 32 -5.41 0.00
 14 14 32 2.06 0.00
 12 16 32 13.67 0.00
 14 16 32 9.60 0.00
 10 18 32 13.21 0.00
 12 18 32 -1.69 0.00
 10 20 32 5.70 0.00
 12 20 32 1.41 0.00
 8 22 32 2.78 0.00
 10 22 32 9.58 0.00
 6 24 32 -0.77 0.00
 8 24 32 -9.50 0.00
 10 24 32 6.39 0.00
 0 26 32 -11.12 0.00
 2 26 32 -14.24 0.00
 4 26 32 3.48 0.00
 6 26 32 13.68 0.00
 8 26 32 -1.56 0.00
 0 28 32 17.38 0.00
 2 28 32 7.76 0.00
 4 28 32 -4.88 0.00
 15 1 33 1.81 0.00
 15 3 33 -2.26 0.00
 15 5 33 -2.18 0.00
 15 7 33 -2.43 0.00
 13 9 33 -26.37 0.00
 15 9 33 0.31 0.00
 13 11 33 -16.61 0.00
 15 11 33 3.38 0.00
 13 13 33 -15.35 0.00
 11 15 33 1.21 0.00
 13 15 33 -6.89 0.00
 11 17 33 0.93 0.00
 13 17 33 -1.32 0.00
 9 19 33 1.01 0.00
 11 19 33 -0.68 0.00
 7 21 33 6.77 0.00
 9 21 33 13.34 0.00
 11 21 33 -0.33 0.00
 5 23 33 1.42 0.00
 7 23 33 1.45 0.00
 9 23 33 5.19 0.00
 1 25 33 -3.30 0.00
 3 25 33 0.92 0.00
 5 25 33 2.46 0.00
 7 25 33 3.57 0.00
 1 27 33 1.14 0.00
 3 27 33 3.23 0.00
 5 27 33 -2.92 0.00
 1 29 33 -3.30 0.00
 14 0 34 -13.64 0.00
 16 0 34 0.72 0.00
 14 2 34 -9.84 0.00
 16 2 34 2.25 0.00
 14 4 34 -0.88 0.00
 16 4 34 3.20 0.00
 14 6 34 4.17 0.00
 14 8 34 8.23 0.00
 14 10 34 7.29 0.00
 12 12 34 -1.81 0.00
 14 12 34 -5.53 0.00
 12 14 34 -13.53 0.00
 14 14 34 -2.81 0.00
 10 16 34 -17.10 0.00
 12 16 34 -0.86 0.00
 10 18 34 -2.63 0.00
 12 18 34 -13.55 0.00
 8 20 34 4.57 0.00
 10 20 34 -9.01 0.00
 6 22 34 2.65 0.00
 8 22 34 -0.50 0.00
 10 22 34 -1.70 0.00
 0 24 34 6.28 0.00
 2 24 34 16.28 0.00
 4 24 34 10.22 0.00
 6 24 34 7.84 0.00
 8 24 34 -6.94 0.00
 0 26 34 -0.09 0.00
 2 26 34 0.81 0.00
 4 26 34 -3.08 0.00
 6 26 34 -2.64 0.00
 0 28 34 6.96 0.00
 2 28 34 7.51 0.00
 13 1 35 1.18 0.00
 15 1 35 7.05 0.00
 13 3 35 1.22 0.00
 15 3 35 -0.02 0.00
 13 5 35 0.77 0.00
 15 5 35 -6.35 0.00
 13 7 35 4.69 0.00
 15 7 35 -4.79 0.00
 13 9 35 -2.69 0.00
 15 9 35 -2.69 0.00
 13 11 35 11.69 0.00
 11 13 35 -0.02 0.00
 13 13 35 6.74 0.00
 11 15 35 7.29 0.00
 13 15 35 5.75 0.00
 9 17 35 -0.23 0.00
 11 17 35 6.98 0.00
 9 19 35 1.47 0.00
 11 19 35 2.51 0.00
 7 21 35 -5.74 0.00
 9 21 35 -0.09 0.00
 1 23 35 11.77 0.00
 3 23 35 6.10 0.00
 5 23 35 -9.90 0.00
 7 23 35 -12.71 0.00
 9 23 35 -0.04 0.00
 1 25 35 12.48 0.00
 3 25 35 5.43 0.00
 5 25 35 -2.51 0.00
 7 25 35 1.61 0.00
 1 27 35 7.98 0.00
 3 27 35 1.03 0.00
 12 0 36 19.08 0.00
 14 0 36 -6.58 0.00
 12 2 36 4.38 0.00
 14 2 36 -2.65 0.00
 14 4 36 -1.93 0.00
 12 6 36 -16.04 0.00
 14 6 36 -7.30 0.00
 12 8 36 -8.72 0.00
 14 8 36 2.27 0.00
 12 10 36 12.49 0.00
 14 10 36 12.03 0.00
 12 12 36 -4.67 0.00
 14 12 36 -2.76 0.00
 10 14 36 7.20 0.00
 12 14 36 1.75 0.00
 10 16 36 1.10 0.00
 12 16 36 8.03 0.00
 8 18 36 1.16 0.00
 10 18 36 4.37 0.00
 6 20 36 7.57 0.00
 8 20 36 -0.57 0.00
 10 20 36 -6.68 0.00
 0 22 36 3.46 0.00
 2 22 36 -3.62 0.00
 4 22 36 -2.20 0.00
 6 22 36 -1.02 0.00
 8 22 36 -1.28 0.00
 0 24 36 1.34 0.00
 2 24 36 -1.94 0.00
 4 24 36 6.93 0.00
 6 24 36 10.89 0.00
 0 26 36 -7.34 0.00
 2 26 36 -12.31 0.00
 4 26 36 -6.63 0.00
 13 1 37 -11.16 0.00
 15 1 37 7.19 0.00
 13 3 37 10.26 0.00
 15 3 37 6.77 0.00
 13 5 37 13.82 0.00
 13 7 37 -3.96 0.00
 13 9 37 -12.37 0.00
 11 11 37 -4.01 0.00
 13 11 37 -5.73 0.00
 11 13 37 -1.07 0.00
 13 13 37 -2.63 0.00
 9 15 37 1.44 0.00
 11 15 37 -0.06 0.00
 9 17 37 7.70 0.00
 11 17 37 4.06 0.00
 7 19 37 -11.12 0.00
 9 19 37 -4.36 0.00
 1 21 37 3.94 0.00
 3 21 37 1.08 0.00
 5 21 37 -2.18 0.00
 7 21 37 -5.56 0.00
 9 21 37 3.39 0.00
 1 23 37 -3.62 0.00
 3 23 37 -2.12 0.00
 5 23 37 0.01 0.00
 7 23 37 -2.51 0.00
 1 25 37 -18.39 0.00
 3 25 37 -5.37 0.00
 5 25 37 1.22 0.00
 12 0 38 11.75 0.00
 14 0 38 4.31 0.00
 12 2 38 -0.66 0.00
 14 2 38 3.81 0.00
 12 4 38 -10.72 0.00
 14 4 38 -1.62 0.00
 12 6 38 -0.17 0.00
 14 6 38 2.11 0.00
 12 8 38 1.67 0.00
 14 8 38 4.76 0.00
 12 10 38 4.13 0.00
 10 12 38 -14.90 0.00
 12 12 38 -9.78 0.00
 10 14 38 -8.42 0.00
 12 14 38 1.93 0.00
 8 16 38 13.44 0.00
 10 16 38 -2.01 0.00
 6 18 38 4.76 0.00
 8 18 38 14.69 0.00
 10 18 38 -5.35 0.00
 0 20 38 -1.04 0.00
 2 20 38 1.61 0.00
 4 20 38 2.48 0.00
 6 20 38 0.26 0.00
 8 20 38 1.63 0.00
 0 22 38 -5.81 0.00
 2 22 38 2.26 0.00
 4 22 38 0.98 0.00
 6 22 38 0.18 0.00
 8 22 38 5.90 0.00
 0 24 38 -8.35 0.00
 2 24 38 0.56 0.00
 4 24 38 3.94 0.00
 6 24 38 3.47 0.00
 0 26 38 2.96 0.00
 2 26 38 3.57 0.00
 11 1 39 -6.90 0.00
 13 1 39 -7.59 0.00
 11 3 39 0.53 0.00
 13 3 39 -2.72 0.00
 11 5 39 6.03 0.00
 13 5 39 4.51 0.00
 11 7 39 -2.95 0.00
 13 7 39 0.58 0.00
 11 9 39 7.22 0.00
 13 9 39 4.65 0.00
 11 11 39 -0.79 0.00
 13 11 39 3.04 0.00
 9 13 39 -1.17 0.00
 11 13 39 4.91 0.00
 9 15 39 -11.52 0.00
 11 15 39 -1.75 0.00
 7 17 39 -7.71 0.00
 9 17 39 0.50 0.00
 1 19 39 5.77 0.00
 3 19 39 5.12 0.00
 5 19 39 -1.97 0.00
 7 19 39 -7.69 0.00
 9 19 39 -9.66 0.00
 1 21 39 1.92 0.00
 3 21 39 -5.45 0.00
 5 21 39 1.60 0.00
 7 21 39 2.38 0.00
 1 23 39 0.38 0.00
 3 23 39 -9.89 0.00
 5 23 39 -0.43 0.00
 1 25 39 -2.24 0.00
 3 25 39 -4.43 0.00
 10 0 40 -14.17 0.00
 12 0 40 2.46 0.00
 10 2 40 -0.38 0.00
 12 2 40 -2.39 0.00
 10 4 40 3.08 0.00
 12 4 40 -10.68 0.00
 10 6 40 15.96 0.00
 12 6 40 0.86 0.00
 10 8 40 20.86 0.00
 12 8 40 3.60 0.00
 10 10 40 10.53 0.00
 12 10 40 1.22 0.00
 10 12 40 12.21 0.00
 12 12 40 -2.67 0.00
 8 14 40 9.31 0.00
 10 14 40 2.64 0.00
 6 16 40 0.05 0.00
 8 16 40 0.91 0.00
 10 16 40 4.94 0.00
 0 18 40 14.20 0.00
 2 18 40 8.04 0.00
 4 18 40 2.10 0.00
 6 18 40 2.40 0.00
 8 18 40 4.67 0.00
 0 20 40 1.05 0.00
 2 20 40 -0.92 0.00
 4 20 40 0.72 0.00
 6 20 40 -0.87 0.00
 8 20 40 -1.35 0.00
 0 22 40 -4.69 0.00
 2 22 40 1.55 0.00
 4 22 40 -1.89 0.00
 6 22 40 -5.45 0.00
 0 24 40 3.02 0.00
 2 24 40 2.22 0.00
 11 1 41 15.44 0.00
 13 1 41 -0.64 0.00
 11 3 41 2.96 0.00
 13 3 41 0.96 0.00
 11 5 41 -9.52 0.00
 13 5 41 1.67 0.00
 9 7 41 9.17 0.00
 11 7 41 -12.19 0.00
 9 9 41 1.53 0.00
 11 9 41 -9.68 0.00
 9 11 41 1.54 0.00
 11 11 41 -6.14 0.00
 7 13 41 4.36 0.00
 9 13 41 0.98 0.00
 11 13 41 -1.46 0.00
 7 15 41 -10.08 0.00
 9 15 41 -5.23 0.00
 1 17 41 11.62 0.00
 3 17 41 3.55 0.00
 5 17 41 9.10 0.00
 7 17 41 -0.41 0.00
 9 17 41 -3.01 0.00
 1 19 41 -0.98 0.00
 3 19 41 -0.96 0.00
 5 19 41 0.51 0.00
 7 19 41 8.83 0.00
 1 21 41 -2.54 0.00
 3 21 41 -4.89 0.00
 5 21 41 1.85 0.00
 1 23 41 4.90 0.00
 3 23 41 4.46 0.00
 10 0 42 3.22 0.00
 12 0 42 -7.87 0.00
 10 2 42 6.67 0.00
 12 2 42 -3.57 0.00
 10 4 42 8.25 0.00
 12 4 42 2.32 0.00
 10 6 42 1.17 0.00
 12 6 42 4.34 0.00
 10 8 42 -2.56 0.00
 12 8 42 0.91 0.00
 8 10 42 -17.36 0.00
 10 10 42 -3.72 0.00
 8 12 42 -7.41 0.00
 10 12 42 6.03 0.00
 6 14 42 -0.94 0.00
 8 14 42 1.94 0.00
 10 14 42 -0.69 0.00
 0 16 42 -11.55 0.00
 2 16 42 -2.80 0.00
 4 16 42 2.50 0.00
 6 16 42 1.46 0.00
 8 16 42 -1.74 0.00
 0 18 42 -1.71 0.00
 2 18 42 -1.42 0.00
 4 18 42 3.17 0.00
 6 18 42 -7.55 0.00
 8 18 42 2.47 0.00
 0 20 42 -8.82 0.00
 2 20 42 -8.03 0.00
 4 20 42 5.37 0.00
 6 20 42 -2.99 0.00
 0 22 42 2.16 0.00
 2 22 42 4.36 0.00
 4 22 42 4.47 0.00
 9 1 43 -7.88 0.00
 11 1 43 -3.00 0.00
 9 3 43 6.28 0.00
 11 3 43 -0.07 0.00
 9 5 43 -3.00 0.00
 11 5 43 -3.96 0.00
 9 7 43 15.94 0.00
 11 7 43 2.51 0.00
 7 9 43 17.54 0.00
 9 9 43 1.52 0.00
 11 9 43 -4.73 0.00
 7 11 43 4.91 0.00
 9 11 43 0.20 0.00
 5 13 43 6.64 0.00
 7 13 43 10.63 0.00
 9 13 43 -4.91 0.00
 1 15 43 -3.45 0.00
 3 15 43 2.00 0.00
 5 15 43 -2.78 0.00
 7 15 43 -2.34 0.00
 9 15 43 3.15 0.00
 1 17 43 10.26 0.00
 3 17 43 3.47 0.00
 5 17 43 1.57 0.00
 7 17 43 1.59 0.00
 1 19 43 -3.52 0.00
 3 19 43 -1.45 0.00
 5 19 43 -7.23 0.00
 1 21 43 1.89 0.00
 3 21 43 -5.73 0.00
 8 0 44 9.02 0.00
 10 0 44 -4.80 0.00
 8 2 44 8.49 0.00
 10 2 44 -8.27 0.00
 8 4 44 6.25 0.00
 10 4 44 1.20 0.00
 8 6 44 2.86 0.00
 10 6 44 -4.16 0.00
 8 8 44 -4.70 0.00
 10 8 44 1.80 0.00
 6 10 44 -17.30 0.00
 8 10 44 0.37 0.00
 10 10 44 3.67 0.00
 4 12 44 11.20 0.00
 6 12 44 -10.22 0.00
 8 12 44 1.17 0.00
 0 14 44 -2.26 0.00
 2 14 44 -2.05 0.00
 4 14 44 5.12 0.00
 6 14 44 -1.24 0.00
 8 14 44 4.04 0.00
 0 16 44 6.48 0.00
 2 16 44 -4.65 0.00
 4 16 44 3.12 0.00
 6 16 44 3.30 0.00
 0 18 44 7.51 0.00
 2 18 44 -3.42 0.00
 4 18 44 -1.03 0.00
 6 18 44 -3.74 0.00
 0 20 44 -1.34 0.00
 2 20 44 -0.56 0.00
 4 20 44 6.23 0.00
 7 1 45 0.06 0.00
 9 1 45 -6.98 0.00
 11 1 45 0.73 0.00
 7 3 45 0.57 0.00
 9 3 45 -3.85 0.00
 11 3 45 3.60 0.00
 7 5 45 -0.18 0.00
 9 5 45 -12.29 0.00
 11 5 45 -2.72 0.00
 7 7 45 0.85 0.00
 9 7 45 3.94 0.00
 5 9 45 -7.82 0.00
 7 9 45 8.14 0.00
 9 9 45 -0.55 0.00
 3 11 45 -5.51 0.00
 5 11 45 -16.80 0.00
 7 11 45 -0.85 0.00
 9 11 45 -2.81 0.00
 1 13 45 -3.97 0.00
 3 13 45 -1.55 0.00
 5 13 45 -5.14 0.00
 7 13 45 8.98 0.00
 1 15 45 -13.65 0.00
 3 15 45 1.43 0.00
 5 15 45 -10.04 0.00
 7 15 45 0.77 0.00
 1 17 45 1.21 0.00
 3 17 45 -0.63 0.00
 5 17 45 -7.15 0.00
 1 19 45 -4.10 0.00
 3 19 45 5.07 0.00
 6 0 46 -4.40 0.00
 8 0 46 1.66 0.00
 10 0 46 17.24 0.00
 6 2 46 -9.15 0.00
 8 2 46 -3.19 0.00
 10 2 46 4.01 0.00
 6 4 46 -2.98 0.00
 8 4 46 -1.67 0.00
 10 4 46 1.24 0.00
 6 6 46 5.06 0.00
 8 6 46 6.05 0.00
 10 6 46 -2.70 0.00
 4 8 46 8.23 0.00
 6 8 46 14.31 0.00
 8 8 46 -6.39 0.00
 0 10 46 -18.41 0.00
 2 10 46 -5.78 0.00
 4 10 46 0.77 0.00
 6 10 46 3.90 0.00
 8 10 46 -5.02 0.00
 0 12 46 -8.85 0.00
 2 12 46 -11.95 0.00
 4 12 46 1.40 0.00
 6 12 46 4.01 0.00
 8 12 46 -5.08 0.00
 0 14 46 3.82 0.00
 2 14 46 0.13 0.00
 4 14 46 0.23 0.00
 6 14 46 5.75 0.00
 0 16 46 12.66 0.00
 2 16 46 0.29 0.00
 4 16 46 -0.94 0.00
 0 18 46 2.98 0.00
 2 18 46 -7.06 0.00
 5 1 47 -9.14 0.00
 7 1 47 8.08 0.00
 9 1 47 -4.11 0.00
 5 3 47 -8.26 0.00
 7 3 47 2.12 0.00
 9 3 47 -2.51 0.00
 5 5 47 -5.32 0.00
 7 5 47 1.05 0.00
 9 5 47 2.56 0.00
 1 7 47 -22.69 0.00
 3 7 47 -3.93 0.00
 5 7 47 -7.99 0.00
 7 7 47 -1.56 0.00
 9 7 47 3.97 0.00
 1 9 47 1.07 0.00
 3 9 47 1.05 0.00
 5 9 47 -2.09 0.00
 7 9 47 -1.47 0.00
 1 11 47 -3.13 0.00
 3 11 47 0.07 0.00
 5 11 47 1.38 0.00
 7 11 47 2.73 0.00
 1 13 47 9.23 0.00
 3 13 47 5.06 0.00
 5 13 47 1.02 0.00
 1 15 47 1.77 0.00
 3 15 47 9.60 0.00
 5 15 47 0.67 0.00
 1 17 47 -1.17 0.00
 3 17 47 4.73 0.00
 0 0 0 0.00 0.00
# SQUEEZE RESULTS (Version = 150216)
# Note: Data are Listed for all Voids in the P1 Unit Cell
# i.e. Centre of Gravity, Solvent Accessible Volume,
# Recovered number of Electrons in the Void and
# Details about the Squeezed Material
;
loop_
  _platon_missing_refln_index_h
  _platon_missing_refln_index_k
  _platon_missing_refln_index_l
  _platon_missing_refln_theta
 0 2 0 3.096
 0 0 2 2.158

_platon_squeeze_details
;
TITL exp_2228_a.res in Pbca New: Cmca New: Fmmm
CELL   16.1063   28.5501   40.9518     90.00     90.00     90.00
SPGR Fmmm
# Solvent Accessible Volume =     10739
# Electrons Found in S.A.V. =      3376
# Note: Atoms in Void as Cxxx and Qxxx all others
C101 0.143 0.422 0.048 !       2.04 eA-3
C102 0.830 0.503 0.164 !       1.87 eA-3
C103 0.300 0.497 0.195 !       1.87 eA-3
C104 0.142 0.078 0.231 !       1.56 eA-3
C105 1.000 0.176 0.143 !       1.54 eA-3
C106 0.186 0.077 0.233 !       1.54 eA-3
C107 0.214 0.061 0.244 !       1.51 eA-3
C108 0.775 0.499 0.070 !       1.46 eA-3
C109 1.000 0.031 0.155 !       1.41 eA-3
C110 0.971 0.008 0.165 !       1.35 eA-3
Q111 0.057 0.148-0.003 !       1.35 eA-3
C112 0.500 0.404 0.194 !       1.34 eA-3
C113 0.300 0.237 0.049 !       1.32 eA-3
Q114 0.062 0.424 0.189 !       1.32 eA-3
C115 0.515 0.203 0.005 !       1.28 eA-3
C116 0.500 0.192 0.095 !       1.27 eA-3
C117 1.000 0.176 0.054 !       1.23 eA-3
C118 0.500 0.039-0.002 !       1.23 eA-3
C119 1.000 0.154 0.068 !       1.22 eA-3
C120 0.985 0.383 0.133 !       1.17 eA-3
Q121 0.743 0.031 0.001 !       1.15 eA-3
C122 0.500 0.042 0.023 !       1.14 eA-3
Q123 0.575 0.298 0.038 !       1.11 eA-3
C124 0.819 0.505 0.141 !       1.09 eA-3
Q125 0.774 0.358 0.155 !       1.08 eA-3
C126 0.590 0.154 0.047 !       1.07 eA-3
C127 0.611 0.178 0.054 !       1.05 eA-3
C128 1.000 0.066 0.185 !       1.01 eA-3
C129 0.749 0.187-0.003 !       1.00 eA-3
C130 0.122 0.307 0.046 !       0.99 eA-3
C131 0.470 0.056 0.227 !       0.98 eA-3
C132 0.127 0.457 0.110 !       0.98 eA-3
C133 0.373 0.543 0.390 !       0.98 eA-3
C134 0.112 0.060 0.615 !       0.95 eA-3
C135 0.719 0.164 0.003 !       0.94 eA-3
C136 0.533 0.291 0.104 !       0.92 eA-3
C137 0.035 0.422 0.156 !       0.90 eA-3
C138 1.000 0.377 0.106 !       0.89 eA-3
C139 0.856 0.257 0.066 !       0.87 eA-3
C140 0.782 0.496 0.195 !       0.87 eA-3
C141 0.454 0.045 0.246 !       0.86 eA-3
Q142 0.324 0.123 0.125 !       0.85 eA-3
Q143 0.173 0.337 0.204 !       0.84 eA-3
Q144 0.500 0.311 0.028 !       0.83 eA-3
C145 1.000 0.133 0.172 !       0.81 eA-3
C146 0.051 0.424 0.132 !       0.81 eA-3
Q147 0.812 0.203-0.002 !       0.81 eA-3
Q148 0.282 0.100 0.103 !       0.80 eA-3
C149 1.000 0.498 0.102 !       0.80 eA-3
Q150 0.500 0.499 0.047 !       0.80 eA-3
C151 0.868 0.480 0.102 !       0.79 eA-3
C152 0.112 0.282 0.063 !       0.79 eA-3
Q153 0.659 0.302 0.056 !       0.78 eA-3
C154 0.809 0.499 0.094 !       0.78 eA-3
Q155 0.123 0.049 0.007 !       0.77 eA-3
C156 0.500 0.275 0.102 !       0.77 eA-3
C157 0.500 0.161 0.100 !       0.77 eA-3
C158 0.465 0.023 0.110 !       0.76 eA-3
C159 0.500 0.234-0.004 !       0.76 eA-3
C160 0.808 0.341 0.033 !       0.76 eA-3
Q161 1.000 0.044 0.039 !       0.76 eA-3
C162 0.433 0.028 0.219 !       0.75 eA-3
C163 0.567 0.059 0.100 !       0.75 eA-3
Q164 0.801 0.468 0.031 !       0.73 eA-3
Q165 0.362 0.505 0.031 !       0.73 eA-3
C166 0.500 0.046 0.209 !       0.73 eA-3
Q167 0.778 0.086 0.000 !       0.73 eA-3
C168 0.938 0.499 0.211 !       0.72 eA-3
C169 0.809 0.457 0.062 !       0.72 eA-3
C170 1.000 0.502 0.203 !       0.71 eA-3
Q171 0.580 0.429 0.009 !       0.70 eA-3
C172 0.974 0.502 0.078 !       0.70 eA-3
C173 0.846 0.482 0.116 !       0.69 eA-3
C174 0.371 0.017 0.133 !       0.69 eA-3
C175 0.796 0.469 0.102 !       0.68 eA-3
C176 0.044 0.056 0.196 !       0.68 eA-3
C177 0.500 0.286 0.056 !       0.67 eA-3
C178 0.500 0.414 0.165 !       0.66 eA-3
Q179 0.924 0.277 0.118 !       0.66 eA-3
C180 0.776 0.501 0.109 !       0.65 eA-3
Q181 0.500 0.421 0.034 !       0.63 eA-3
C182 0.464 0.017 0.229 !       0.62 eA-3
Q183 0.401 0.500 0.055 !       0.62 eA-3
C184 0.500 0.044 0.069 !       0.62 eA-3
Q185 0.654 0.299 0.022 !       0.62 eA-3
C186 0.682 0.148 0.001 !       0.61 eA-3
Q187 0.857 0.125-0.001 !       0.61 eA-3
Q188 0.124 0.188-0.001 !       0.61 eA-3
C189 1.000 0.503 0.125 !       0.61 eA-3
C190 0.342 0.125 0.046 !       0.60 eA-3
C191 0.869 0.495 0.055 !       0.60 eA-3
C192 1.000 0.428 0.048 !       0.60 eA-3
C193 0.935 0.500 0.125 !       0.59 eA-3
C194 0.831 0.502 0.211 !       0.59 eA-3
Q195 0.616 0.297 0.008 !       0.59 eA-3
C196 0.451 0.501 0.203 !       0.58 eA-3
Q197 1.000 0.078-0.001 !       0.58 eA-3
Q198 0.215 0.156-0.001 !       0.57 eA-3
C199 0.500 0.007 0.063 !       0.57 eA-3
;
loop_
  _platon_squeeze_void_nr
  _platon_squeeze_void_average_x
  _platon_squeeze_void_average_y
  _platon_squeeze_void_average_z
  _platon_squeeze_void_volume
  _platon_squeeze_void_count_electrons
  _platon_squeeze_void_content
 1 0.381 -0.033 -0.003 10737 3381 ' '

_platon_squeeze_void_probe_radius 1.20
loop_
  _refln_index_h
  _refln_index_k
  _refln_index_l
  _refln_F_squared_meas
  _refln_F_squared_sigma
 4 0 0 4581.27 17.31
 5 0 0 -0.37 0.37
 6 0 0 1313.38 11.19
 7 0 0 0.13 0.45
 8 0 0 92.37 3.5
 9 0 0 0.43 0.48
 10 0 0 807.38 11.53
 11 0 0 1.15 0.96
 12 0 0 2161 20.36
 13 0 0 -0.3 0.77
 14 0 0 1994.05 21.36
 15 0 0 1 1.26
 16 0 0 2292.04 29.37
 17 0 0 0.21 1.2
 18 0 0 4658.53 44.48
 19 0 0 -0.91 1.21
 20 0 0 5559.4 51.07
 21 0 0 0.06 1.05
 22 0 0 3421.7 42.73
 23 0 0 -0.57 1.7
 24 0 0 1407.2 29.81
 25 0 0 -0.6 1.88
 26 0 0 898.64 25.12
 27 0 0 0.54 1.69
 28 0 0 201.29 12.44
 29 0 0 -0.09 1.58
 30 0 0 1164.93 31.13
 34 0 0 1996.49 44.08
 35 0 0 1.11 1.96
 36 0 0 2158.92 46.07
 37 0 0 5.09 3.35
 38 0 0 1453.88 37.88
 39 0 0 0.44 2.15
 40 0 0 534.73 22.7
 41 0 0 -2.98 2.48
 42 0 0 45.57 6.52
 43 0 0 2.8 2.19
 44 0 0 283.14 15.16
 45 0 0 1.55 1.73
 46 0 0 271.32 13.68
 47 0 0 -0.96 1.42
 3 -1 0 10.74 0.83
 3 1 0 10.79 1.07
 4 -1 0 0.13 0.25
 4 1 0 -0.67 0.4
 5 -1 0 0.74 1.45
 5 1 0 7.95 2.62
 6 1 0 0.25 0.41
 6 -1 0 0.17 0.47
 6 -1 0 0.18 0.33
 7 -1 0 1 1.14
 7 -1 0 2.56 0.94
 7 1 0 1.4 1.38
 8 -1 0 -0.12 0.5
 8 -1 0 0.12 0.46
 8 1 0 0.59 0.57
 9 -1 0 7.74 1.9
 9 1 0 7.68 2.4
 9 -1 0 11.23 1.9
 10 1 0 0.16 0.68
 10 -1 0 0.49 0.68
 10 -1 0 0.32 0.57
 11 1 0 37.03 4.25
 11 -1 0 33.92 4.12
 12 -1 0 2.68 1.45
 12 1 0 2.16 1.29
 13 1 0 114.81 6.72
 13 -1 0 58.09 6.75
 14 1 0 -0.09 0.79
 14 -1 0 1.48 1.26
 15 -1 0 25.16 4.01
 15 1 0 35.27 4.01
 16 -1 0 1.01 0.75
 16 1 0 -0.25 0.7
 17 1 0 27.49 3.93
 17 -1 0 22.81 4.09
 18 -1 0 1.89 1.44
 19 1 0 13.83 4.57
 19 -1 0 16.3 4.6
 20 1 0 -1.17 1.41
 20 -1 0 2.17 1.02
 21 -1 0 33.64 5.3
 21 1 0 21.62 5.86
 22 1 0 -1.06 1.02
 22 -1 0 0.34 1.04
 23 -1 0 24.16 4.6
 23 1 0 29.35 5.2
 24 -1 0 0.16 0.9
 24 1 0 0.23 1.54
 25 -1 0 20.96 4.34
 25 1 0 19.13 4.65
 26 -1 0 0.68 1.27
 26 1 0 -1.38 1.9
 27 1 0 7.06 3.47
 27 -1 0 8.46 3.14
 28 1 0 -1.37 2.49
 28 -1 0 2.81 1.88
 29 -1 0 14.91 4.25
 29 1 0 13.27 4.6
 30 1 0 -0.5 1.51
 30 -1 0 -2.86 2.06
 31 1 0 52.97 8.51
 32 -1 0 1.13 2.15
 33 -1 0 125.12 12.62
 34 -1 0 -1.53 1.93
 35 -1 0 101.71 12.49
 35 1 0 98.14 11.66
 36 1 0 -0.94 2.23
 36 -1 0 -3.76 3.56
 37 -1 0 52.55 9.03
 37 1 0 45.68 9.31
 38 1 0 2.02 2.5
 38 -1 0 -0.42 2.76
 39 1 0 23.21 6.1
 39 -1 0 20.52 5.97
 40 1 0 2.25 2.71
 40 -1 0 1.69 3.06
 41 1 0 7.69 3.77
 41 -1 0 -0.38 1.85
 42 1 0 0.9 2.57
 42 -1 0 -1.3 1.62
 43 1 0 1.09 2.37
 43 -1 0 2.37 2.19
 44 1 0 0.71 2.37
 44 -1 0 0.11 3.15
 45 -1 0 8.14 3.33
 45 1 0 8.69 3.58
 46 1 0 1.83 1.92
 46 -1 0 -2.64 2.05
 47 1 0 13.07 3.56
 47 -1 0 12.33 3.4
 2 2 0 9999 30.76
 3 -2 0 -0.12 0.17
 3 2 0 0.25 0.36
 4 -2 0 918.45 8.4
 4 2 0 953.41 10.72
 5 -2 0 0.39 0.45
 5 2 0 0.32 0.65
 6 -2 0 166.89 4.36
 6 2 0 174.04 5.16
 7 2 0 -0.2 0.65
 7 -2 0 -0.29 0.46
 8 -2 0 156.36 5.02
 8 2 0 156.05 5.42
 9 -2 0 0 0.7
 9 2 0 -0.12 0.63
 10 2 0 124.06 5.19
 10 -2 0 133.34 5.25
 11 -2 0 -0.26 0.81
 11 2 0 1.4 0.91
 12 -2 0 1830.66 21.65
 12 2 0 1845.43 21.99
 13 -2 0 3.22 1.72
 13 2 0 3.37 1.56
 14 2 0 2201.42 25.89
 14 -2 0 2249.27 25.99
 15 -2 0 -0.43 0.8
 15 2 0 0.05 0.93
 16 -2 0 984.37 18.55
 16 2 0 930.61 17.83
 17 2 0 1.96 1.18
 17 -2 0 2.14 1.56
 18 2 0 335.34 11.44
 18 -2 0 361.54 11.87
 19 -2 0 5.11 1.93
 20 -2 0 1966.31 29.42
 21 2 0 2.76 1.64
 21 -2 0 5.14 2.23
 22 2 0 448.59 16.7
 22 -2 0 443.4 14.72
 23 -2 0 3.74 1.95
 23 2 0 4.36 2.39
 24 2 0 442.8 17.35
 24 -2 0 447.58 15.6
 25 -2 0 1.51 1.63
 25 2 0 2.76 2.3
 26 -2 0 122.62 8.73
 26 2 0 123.59 9.72
 27 -2 0 3.65 2.77
 27 2 0 2.17 1.87
 28 2 0 89.37 8.68
 28 -2 0 81.19 7.46
 29 -2 0 6.93 3.66
 29 -2 0 0.01 1.32
 29 2 0 2.87 2.5
 30 2 0 776.31 27.14
 30 -2 0 742.78 25.56
 31 -2 0 2.58 2.45
 31 2 0 5.96 3.68
 32 -2 0 1114.58 32.64
 32 2 0 960.27 31.19
 33 -2 0 8.17 3.76
 34 -2 0 1607.32 39.59
 35 -2 0 1.16 2.35
 36 -2 0 1452.76 37.81
 37 -2 0 5.17 3.29
 37 2 0 2.67 2.32
 38 -2 0 777.38 27.8
 38 2 0 753.69 27.21
 39 -2 0 14.89 5.52
 39 2 0 17.56 5.7
 40 2 0 1.24 3.35
 40 -2 0 2.85 2.35
 41 -2 0 1.77 2.6
 41 2 0 0.2 2.27
 42 -2 0 11.4 3.53
 42 2 0 8.25 3.3
 43 2 0 1.57 2.58
 43 -2 0 3.39 2.33
 44 -2 0 50.05 7.2
 44 2 0 50.9 6.62
 45 2 0 2.31 2.46
 45 -2 0 3.65 2.39
 46 2 0 227.18 12.53
 46 -2 0 225.13 12.12
 47 2 0 1.46 1.67
 47 -2 0 0.01 1.07
 0 -3 0 -0.41 0.39
 1 -3 0 0.09 0.27
 2 3 0 -0.35 0.5
 2 -3 0 0.38 0.34
 3 -3 0 2.27 0.69
 3 3 0 0.51 0.7
 4 -3 0 0.52 0.48
 4 3 0 0.28 0.6
 5 -3 0 0.3 0.4
 5 3 0 1.25 0.81
 6 3 0 -0.01 0.59
 6 -3 0 0.7 0.52
 7 -3 0 1.39 0.56
 7 3 0 1.62 0.79
 8 -3 0 0.22 0.73
 8 3 0 0.66 0.66
 9 3 0 6.66 1.55
 9 -3 0 7.06 1.22
 10 -3 0 1.52 0.84
 10 3 0 0.81 1.2
 11 -3 0 -0.37 0.71
 11 3 0 1.14 1.08
 12 -3 0 0.5 0.66
 12 3 0 1.08 1.06
 13 3 0 1.99 1.36
 13 -3 0 2.4 1.32
 14 -3 0 0.38 0.85
 14 3 0 3.76 1.6
 15 -3 0 0.61 1.23
 15 3 0 0.21 1.27
 16 3 0 0.24 0.91
 16 -3 0 0.72 1.02
 17 3 0 -0.23 1.29
 17 -3 0 -0.28 0.65
 18 -3 0 0.34 1.31
 18 3 0 0.17 1.13
 19 -3 0 8.92 2.02
 19 3 0 10.2 2.5
 20 3 0 2.43 1.48
 20 -3 0 4.2 1.77
 21 -3 0 5.87 1.97
 22 -3 0 3.08 2.07
 23 3 0 1.43 1.83
 23 -3 0 1.73 1.61
 24 3 0 1.95 1.9
 24 -3 0 1.98 1.82
 25 3 0 0.42 2.03
 25 -3 0 1.98 1.56
 26 3 0 0.64 1.85
 26 -3 0 2.1 2.09
 26 -3 0 0.16 1.17
 27 -3 0 -1.09 1.35
 27 -3 0 2.9 2.2
 27 3 0 -2.03 2.59
 28 3 0 -0.26 1.59
 28 -3 0 1.72 1.78
 29 -3 0 1.79 2.56
 29 3 0 -0.26 1.98
 30 -3 0 0.65 1.99
 30 3 0 1 1.66
 31 3 0 3.94 2.28
 31 -3 0 0.31 2.37
 32 -3 0 -0.33 1.97
 32 3 0 -0.7 2.09
 33 -3 0 14.21 6.07
 34 -3 0 0.31 2.38
 35 -3 0 13.86 5.43
 36 -3 0 1.43 2.17
 37 -3 0 9.83 4.8
 38 -3 0 7.4 3.41
 38 3 0 7.13 3.68
 39 -3 0 2.27 2.84
 39 3 0 1.3 2.15
 40 3 0 4.16 3.72
 40 -3 0 3.93 2.17
 41 3 0 3.46 3.37
 41 -3 0 3.3 2.88
 42 -3 0 0.34 1.98
 42 3 0 0.99 2.26
 43 3 0 5.72 5.23
 43 -3 0 1.79 1.96
 44 3 0 -0.72 1.55
 44 -3 0 8.53 3.4
 45 -3 0 2.17 1.28
 45 3 0 3.78 2.44
 46 3 0 6.49 3.02
 46 -3 0 2.59 2.58
 47 3 0 3.74 2.26
 47 -3 0 0.6 1.76
 0 -4 0 291.56 5.49
 1 -4 0 0.66 0.48
 2 4 0 8.39 1.24
 2 -4 0 9.68 1.02
 3 4 0 3.46 1.22
 3 -4 0 1.75 0.77
 4 4 0 3213.16 24.36
 4 -4 0 3290.13 18.74
 5 -4 0 4.03 1.17
 5 4 0 5.78 1.63
 6 4 0 1262.03 16.33
 6 -4 0 1220.67 12.42
 7 4 0 0.76 0.9
 7 -4 0 0.28 0.55
 8 4 0 2620.18 25.23
 8 -4 0 2553.83 19.69
 9 -4 0 0.64 0.73
 9 4 0 -0.03 0.75
 10 -4 0 126.64 4.89
 10 4 0 133.62 6.01
 11 4 0 2.88 1.54
 11 -4 0 1.49 1.04
 12 -4 0 7.6 1.43
 12 4 0 7.23 1.71
 13 -4 0 0.03 0.81
 13 4 0 0.46 1.07
 14 -4 0 7.81 2.03
 14 4 0 16.82 2.89
 15 -4 0 6.2 1.81
 15 4 0 5.57 2.3
 16 4 0 259.25 10.34
 16 -4 0 258.25 8.91
 17 -4 0 0.73 1.18
 17 4 0 0.02 0.98
 18 -4 0 2.79 1.38
 18 4 0 2.11 1.41
 19 4 0 0.78 1.15
 19 -4 0 0 1.15
 20 4 0 323.74 12.49
 20 -4 0 328.39 11.44
 21 -4 0 6.81 2.54
 21 4 0 5.42 2.79
 22 -4 0 128.72 9.03
 22 -4 0 130.25 7.68
 23 -4 0 1.16 1.1
 23 -4 0 3.56 2.47
 24 -4 0 347.09 15.73
 24 -4 0 365.87 13.84
 25 -4 0 5.29 2.46
 25 4 0 5.07 3.38
 25 -4 0 10.02 3.69
 26 4 0 390.48 18.6
 26 -4 0 375.46 16.94
 26 -4 0 389.29 15.14
 27 4 0 0.37 1.95
 27 -4 0 0.41 1.36
 27 -4 0 3.29 2.56
 28 4 0 69.07 8.08
 28 -4 0 64.96 7.41
 29 4 0 7.17 3.57
 29 -4 0 4.96 3.15
 30 4 0 2.2 1.93
 30 -4 0 -0.92 2.48
 31 4 0 7.17 4.07
 31 -4 0 4.36 2.9
 32 4 0 354.32 20.19
 32 -4 0 375.49 18.6
 33 -4 0 3.88 2.74
 33 4 0 -1.78 2.67
 34 -4 0 465.62 21.47
 35 -4 0 8.8 4.32
 36 -4 0 392.74 19.63
 37 -4 0 16.98 5.43
 38 -4 0 157.12 12.5
 39 4 0 4.61 3.69
 39 -4 0 2.81 2.19
 40 4 0 202.67 14.15
 40 -4 0 207.24 14.12
 41 4 0 4.5 3.18
 41 -4 0 1.15 1.93
 42 4 0 126.94 10.98
 42 -4 0 121.41 10.22
 43 -4 0 8.39 3.81
 43 4 0 2.61 2.8
 44 -4 0 48.55 5.89
 44 4 0 51.96 6.57
 45 -4 0 7.95 2.93
 45 4 0 7.05 3.66
 46 -4 0 1.1 1.62
 46 4 0 3.74 2.13
 47 4 0 3.94 2.39
 0 5 0 0.34 0.57
 0 -5 0 0.17 0.5
 1 5 0 0.34 0.66
 1 -5 0 0.39 0.44
 2 5 0 0.74 0.87
 2 -5 0 -0.28 0.44
 3 5 0 -0.66 0.72
 3 -5 0 0.16 0.39
 4 5 0 1.87 1.02
 4 -5 0 2.09 0.92
 5 5 0 -0.25 0.85
 5 -5 0 -0.09 0.48
 -5 5 0 0.16 0.4
 6 5 0 8.01 1.83
 -6 5 0 4.79 0.75
 6 -5 0 6.88 1.44
 7 -5 0 7.33 1.66
 7 5 0 3.98 1.99
 8 5 0 -0.07 0.92
 8 -5 0 1.37 0.75
 9 5 0 10.44 2.44
 9 -5 0 6.96 1.97
 10 5 0 14.7 2.73
 10 -5 0 9.06 1.98
 11 -5 0 23.76 2.38
 11 5 0 19.64 2.83
 12 -5 0 -0.55 0.65
 12 5 0 -1.21 1.15
 13 5 0 8.72 2.09
 13 -5 0 6.31 1.41
 14 5 0 1.08 1.07
 14 -5 0 1.51 0.94
 15 5 0 3.86 1.89
 15 -5 0 2.34 1.52
 16 -5 0 3.09 1.53
 16 5 0 4.97 2.13
 17 -5 0 0.65 0.82
 17 5 0 -0.08 1
 18 -5 0 -0.22 0.91
 18 5 0 0.67 1.76
 19 -5 0 2.39 1.78
 19 5 0 0.06 1.33
 20 5 0 4.53 1.98
 20 -5 0 3.01 1.44
 21 -5 0 5.25 2.05
 21 5 0 5.17 2.17
 22 -5 0 4.32 2.33
 22 5 0 5.61 2.44
 22 -5 0 2.82 1.68
 23 -5 0 5.41 3.4
 23 -5 0 4.68 2.04
 24 -5 0 3.16 2.11
 24 -5 0 1.56 1.08
 25 -5 0 8.99 3.06
 25 -5 0 8.01 4.21
 26 5 0 3.69 2.94
 26 -5 0 2.22 1.87
 26 -5 0 3.07 1.88
 27 5 0 0.75 2.15
 27 -5 0 4.59 2.53
 28 5 0 -0.51 1.84
 28 -5 0 2.26 2.76
 29 5 0 1.45 2.49
 29 -5 0 3.27 2.22
 30 5 0 1.15 2.17
 30 -5 0 0.57 1.79
 31 5 0 2.22 2.45
 31 -5 0 1.22 2.87
 32 5 0 4.18 3.54
 32 -5 0 -0.04 1.97
 33 -5 0 -0.26 2.29
 33 5 0 1.74 2.99
 34 -5 0 -1.19 2.27
 35 -5 0 8.42 3.49
 36 -5 0 9.17 3.68
 37 -5 0 6.47 3.23
 38 -5 0 0.63 1.67
 39 -5 0 11.19 4.34
 40 5 0 -1.02 2.69
 40 -5 0 2.24 2.59
 41 -5 0 9.18 3.18
 41 5 0 9.34 4.11
 42 -5 0 -1.89 2.44
 42 5 0 2.66 2.44
 43 -5 0 10.95 4.16
 43 5 0 9.67 3.64
 44 5 0 2.82 3.01
 44 -5 0 3.7 2.18
 45 5 0 5.41 2.53
 45 -5 0 5.39 2.3
 46 5 0 2.36 1.78
 46 -5 0 1.36 1.73
 47 5 0 0.63 1.29
 0 -6 0 874.18 11.95
 0 6 0 876.29 13.52
 1 6 0 -0.61 0.93
 -1 6 0 -0.28 0.79
 1 -6 0 0.34 0.46
 2 6 0 711.35 13.08
 2 -6 0 703.94 10.5
 -2 6 0 695.4 11.39
 -3 6 0 -0.36 0.53
 3 6 0 -0.61 0.74
 3 -6 0 0.02 0.48
 4 6 0 2293.49 24.06
 4 -6 0 2286.07 19.14
 -4 6 0 2292.32 18.83
 5 -6 0 6.38 1.61
 -5 6 0 5.35 1.15
 5 6 0 5.34 2.02
 6 -6 0 21.12 1.94
 -6 6 0 25.01 1.84
 6 6 0 21.43 2.8
 -7 6 0 3.21 0.69
 7 -6 0 2.81 1.15
 8 -6 0 2698.19 21.99
 8 6 0 2660.79 28.39
 9 -6 0 1.15 0.78
 9 6 0 0.89 1
 10 6 0 664.84 14.97
 10 -6 0 653.47 11.55
 11 -6 0 -0.62 0.82
 11 6 0 0.17 1.1
 12 -6 0 898.22 14.57
 12 6 0 918.68 18.47
 13 6 0 0.5 1.32
 13 -6 0 1.21 0.88
 14 -6 0 101.07 5.29
 14 6 0 108.29 6.75
 15 -6 0 0.04 0.79
 15 6 0 2.25 1.51
 16 6 0 507.24 15.41
 16 -6 0 490.84 12.4
 17 -6 0 9.71 2.47
 17 6 0 11.25 3.16
 18 6 0 5.37 1.86
 18 -6 0 5.17 1.69
 19 6 0 1.9 1.83
 19 -6 0 2.36 1.64
 20 -6 0 1071.04 20.75
 20 6 0 1041.61 24.63
 21 -6 0 2.15 1.5
 21 6 0 -0.05 1.75
 21 -6 0 -0.83 1.18
 22 6 0 2554.57 40.27
 22 -6 0 2485.33 33.63
 22 -6 0 2499.91 40.79
 23 -6 0 4.5 3.04
 23 -6 0 3.85 1.8
 24 -6 0 2276.68 40.41
 24 -6 0 2193.73 33.53
 25 -6 0 -0.96 1.78
 25 -6 0 -0.49 1.3
 26 -6 0 1406.6 32.88
 27 -6 0 2.83 2.33
 27 6 0 4.68 3.02
 28 6 0 810.7 30.32
 28 -6 0 778.03 25.39
 29 6 0 1.22 2.75
 29 -6 0 0.8 1.96
 30 -6 0 145.83 11.68
 30 6 0 162.4 13.92
 31 6 0 1.28 2.99
 31 -6 0 4.53 3.32
 32 6 0 37.93 6.88
 32 -6 0 43.39 6.55
 33 6 0 0.34 2.19
 33 -6 0 1.82 1.9
 34 6 0 152.81 14.68
 34 -6 0 181.27 13.18
 35 -6 0 2.33 2.38
 36 -6 0 423.84 20.18
 37 -6 0 -0.35 1.68
 38 -6 0 582.96 23.3
 39 -6 0 0.97 2.74
 40 -6 0 537.51 21.71
 41 6 0 -2.42 2.82
 41 -6 0 1.56 2.01
 42 -6 0 589.56 21.48
 42 6 0 571.14 22.85
 43 6 0 2.29 1.71
 43 -6 0 3.91 1.77
 44 6 0 441.95 18.53
 44 -6 0 454.57 18.2
 45 6 0 1.27 1.68
 45 -6 0 3.32 1.93
 46 6 0 98.74 7.99
 46 -6 0 91.18 7.25
 0 7 0 -0.35 0.86
 0 -7 0 -0.08 0.64
 1 7 0 7.35 2
 -1 7 0 6.82 1.69
 1 -7 0 2.82 1.17
 2 7 0 0.74 0.91
 -2 7 0 -0.91 0.88
 2 -7 0 0.51 0.71
 -3 7 0 2.51 1.33
 3 7 0 1.86 1.43
 3 -7 0 2.17 0.92
 4 -7 0 1.05 0.83
 4 7 0 0.31 1.16
 -4 7 0 0.98 0.79
 -5 7 0 3.53 1.09
 5 -7 0 2.41 1.25
 5 7 0 2.09 1.49
 -6 7 0 0.29 0.51
 6 7 0 0.78 1.27
 6 -7 0 -0.75 0.83
 -7 7 0 3.39 0.97
 7 -7 0 4.22 1.57
 7 7 0 4.83 2.19
 8 7 0 -0.39 1.18
 -8 7 0 0.65 0.35
 8 -7 0 -0.02 0.53
 9 -7 0 9.64 2.04
 9 7 0 14.24 2.82
 10 7 0 0.28 1.08
 10 -7 0 -0.18 0.75
 11 7 0 10.41 3.19
 11 -7 0 8.44 1.96
 12 -7 0 1.49 0.98
 12 7 0 1.25 1.01
 13 -7 0 16.1 2.69
 13 7 0 16.78 3.62
 14 -7 0 6.22 1.88
 14 7 0 6.42 2.19
 15 -7 0 2.92 1.21
 15 7 0 0.1 1.05
 16 -7 0 1.22 1.05
 16 7 0 1.23 1
 17 7 0 12.72 2.89
 17 -7 0 15.99 2.51
 18 -7 0 2.58 1.38
 18 7 0 3.82 1.94
 19 -7 0 2.05 1.31
 19 7 0 -0.31 1.31
 20 7 0 -0.69 1.58
 20 -7 0 1.62 1.04
 21 7 0 16.12 4.16
 21 -7 0 14.27 3.17
 21 -7 0 19.6 5.25
 22 -7 0 3.24 1.53
 22 -7 0 3.43 1.87
 22 7 0 1.82 1.18
 23 7 0 42.91 7.13
 23 -7 0 41.19 5.61
 23 -7 0 47.69 7.73
 24 -7 0 11.19 2.66
 24 -7 0 8.27 3.07
 25 -7 0 31.44 6.08
 26 -7 0 1.65 1.76
 27 -7 0 27.86 5.85
 28 -7 0 0.41 1.89
 28 7 0 0.88 2.43
 29 -7 0 7.15 3.48
 29 7 0 2.15 3.28
 30 7 0 0.62 1.94
 30 -7 0 -3.37 2.09
 31 -7 0 -0.23 2.29
 31 7 0 3.79 3.45
 32 -7 0 1.73 2.3
 32 7 0 1.68 3.24
 33 7 0 1.43 3.11
 33 -7 0 2.93 2.55
 34 -7 0 12.35 4.66
 34 7 0 9.39 5.03
 35 -7 0 7.25 3.46
 36 -7 0 1.79 2.7
 37 -7 0 14.33 4.59
 38 -7 0 1.14 2.14
 39 -7 0 20.03 5.17
 40 -7 0 -3.76 2.39
 41 7 0 24.61 5.64
 41 -7 0 25.11 5.14
 42 -7 0 1.8 1.79
 42 7 0 0.33 3.48
 43 7 0 23.67 6.63
 43 -7 0 31.98 5.54
 44 -7 0 4.14 2.29
 44 7 0 2.95 2.59
 45 -7 0 17.74 3.83
 45 7 0 13.04 3.94
 46 -7 0 3.17 1.94
 46 7 0 4.01 2.33
 0 8 0 2742.6 28.89
 0 -8 0 2758.59 25.03
 1 -8 0 1.2 0.77
 -1 8 0 0.54 1.11
 1 8 0 2.8 1.73
 2 8 0 2093.94 26.08
 -2 8 0 2075.56 24.58
 2 -8 0 2049.83 21.42
 3 -8 0 0.57 0.66
 3 8 0 1.49 1.39
 -3 8 0 0.53 1.17
 -4 8 0 4414.5 33.72
 4 8 0 4481.9 38.56
 5 8 0 3.93 2.06
 -5 8 0 1.58 1.33
 5 -8 0 2.64 1.14
 6 -8 0 762.21 12.84
 6 8 0 782.11 16.7
 -6 8 0 807.02 12.91
 7 -8 0 5.84 1.7
 -7 8 0 5 1.39
 7 8 0 7.94 2.62
 8 8 0 5594.1 45.77
 8 -8 0 5546.47 35.77
 9 8 0 1.3 1.82
 9 -8 0 1.98 0.98
 10 8 0 2636.62 32.57
 10 -8 0 2681.57 25.7
 11 -8 0 -1.01 0.89
 11 8 0 -1.67 1.52
 12 -8 0 2589.1 26.52
 12 8 0 2623.91 33.78
 13 -8 0 2.08 1.13
 13 8 0 2.2 1.27
 14 -8 0 616.11 13.71
 14 8 0 622.79 17.23
 15 -8 0 0.49 0.65
 15 8 0 -0.05 1.24
 16 -8 0 707.64 15.61
 16 8 0 699.42 19.19
 17 -8 0 0.41 0.86
 17 8 0 -0.04 1.15
 18 -8 0 226.94 9.36
 18 8 0 236.72 11.68
 19 8 0 2.15 1.8
 19 -8 0 -0.12 0.67
 20 -8 0 83.36 5.94
 20 -8 0 78.73 7.22
 20 8 0 84.92 7.45
 21 -8 0 10.12 4.02
 21 8 0 11.26 3.68
 21 -8 0 7.68 2.41
 22 -8 0 4014.34 52.51
 22 -8 0 4013.67 43.4
 22 8 0 4042.21 54.17
 23 -8 0 -0.97 1.64
 23 8 0 -1.61 1.81
 23 -8 0 -0.8 1.2
 24 -8 0 2924.61 46.49
 25 -8 0 2.87 2.73
 26 -8 0 2202.81 41.36
 27 -8 0 -1.64 2.22
 28 -8 0 976.25 28.33
 29 -8 0 0.77 2.93
 29 8 0 -1.84 2.87
 30 -8 0 200.6 13.22
 30 8 0 199.53 17.03
 31 8 0 -0.45 2.7
 31 -8 0 2.94 3.09
 32 8 0 8.73 4.2
 32 -8 0 7.88 3.45
 33 -8 0 6.42 3.19
 33 8 0 3.05 2.82
 34 -8 0 483.91 21.15
 35 -8 0 0.08 1.58
 36 -8 0 271.3 15.6
 37 -8 0 1.36 2.04
 38 -8 0 494.62 20.71
 39 -8 0 1.17 1.76
 40 -8 0 749.79 24.9
 41 -8 0 4.5 2.99
 42 -8 0 943.17 26.63
 42 8 0 891.27 27.86
 43 -8 0 1.19 1.3
 43 8 0 1.54 2.04
 44 -8 0 520.07 18.47
 44 8 0 501.84 19.63
 45 -8 0 3.64 1.85
 45 8 0 -0.37 2.08
 46 8 0 286.87 13.24
 0 9 0 -1.73 1.43
 -1 9 0 10.4 2.93
 1 9 0 6.12 2.2
 1 -9 0 7.04 2.14
 -2 9 0 -1.06 1.38
 2 9 0 1.44 1.4
 2 -9 0 2.48 1.19
 -3 9 0 24.17 3.76
 3 -9 0 17.18 2.54
 3 9 0 19.1 3.54
 4 -9 0 8.02 2.09
 4 9 0 8.47 2.41
 -4 9 0 8 2.34
 5 -9 0 9.56 1.75
 -5 9 0 10.74 2.09
 5 9 0 7.9 2.25
 6 9 0 0.25 0.97
 -6 9 0 -0.04 0.76
 6 -9 0 0.75 0.77
 7 -9 0 15.72 2.61
 7 9 0 18.9 3.7
 -7 9 0 20.59 2.48
 -8 9 0 -1.47 0.98
 8 -9 0 0.24 0.62
 9 -9 0 12.08 2.26
 9 9 0 9.21 3.07
 10 9 0 -0.88 1.37
 10 -9 0 0.42 0.76
 11 9 0 10.83 3.34
 11 -9 0 13.96 2.44
 12 9 0 -0.79 1.4
 12 -9 0 2.71 1.01
 13 9 0 9.66 2.72
 13 -9 0 8.07 2.1
 14 -9 0 14.64 2.87
 14 9 0 20.52 3.9
 15 -9 0 2.26 1.32
 15 9 0 1.89 1.76
 16 9 0 0.03 1.34
 16 -9 0 1.04 0.88
 17 -9 0 0.44 0.88
 17 9 0 -0.18 1.29
 18 -9 0 0.78 0.85
 18 9 0 -0.73 1.25
 19 -9 0 -1.02 1.02
 19 9 0 0.75 1.7
 19 -9 0 0.1 1.46
 20 -9 0 -0.12 1.42
 20 -9 0 -0.22 1.1
 20 9 0 -1.03 2.12
 21 -9 0 13.53 5.13
 21 -9 0 11.85 3.02
 21 9 0 11.04 3.73
 22 -9 0 0.08 1
 22 -9 0 -2.26 2.61
 22 9 0 -2.14 2.32
 23 9 0 14.97 4.56
 23 -9 0 26.43 5.88
 24 -9 0 0.92 1.99
 25 -9 0 29.93 6.45
 26 -9 0 -2.87 2.25
 27 -9 0 26.59 5.84
 28 -9 0 3.36 2.62
 29 -9 0 11.03 4.19
 30 -9 0 2.78 2.81
 30 9 0 -1.91 3.25
 31 9 0 0.88 2.23
 31 -9 0 -1.28 1.68
 32 -9 0 11.18 4.03
 32 9 0 9.31 5.83
 33 -9 0 8.04 3.42
 34 -9 0 0.79 1.76
 35 -9 0 9.15 3.81
 36 -9 0 -1.47 2.62
 37 -9 0 8.12 3.46
 38 -9 0 -0.51 1.46
 39 -9 0 8.83 3.73
 40 -9 0 -1.85 1.8
 41 -9 0 23.45 4.95
 42 9 0 -0.84 1.84
 42 -9 0 -0.48 1.65
 43 9 0 15.18 4.58
 43 -9 0 16.17 4.05
 44 -9 0 1.93 1.69
 44 9 0 4.17 2.82
 45 -9 0 11.08 2.87
 45 9 0 9.39 3.63
 0 10 0 642.26 16.51
 -1 10 0 -1.19 1.62
 1 10 0 0.77 1.04
 2 -10 0 291.16 9.38
 2 10 0 284.18 11.14
 -2 10 0 286.59 10.85
 3 10 0 2.61 1.99
 -3 10 0 2.64 1.75
 3 -10 0 5.48 1.7
 4 10 0 1822.6 28.24
 4 -10 0 1864.94 23.2
 -4 10 0 1864.67 26.52
 -5 10 0 1.6 1.32
 5 -10 0 0.68 0.72
 6 -10 0 884.09 15.84
 6 10 0 909.31 20.24
 7 10 0 2.89 2.13
 -7 10 0 1.87 1.29
 7 -10 0 3.23 1.14
 8 10 0 3169.69 38.74
 -8 10 0 3205.74 27.51
 8 -10 0 3157.96 30.34
 9 -10 0 -1.47 1.06
 9 10 0 -0.94 1.06
 10 10 0 4716.01 47.67
 10 -10 0 4807.06 38.14
 11 -10 0 -0.49 0.75
 11 10 0 -0.83 1.19
 12 10 0 3359.04 41.47
 12 -10 0 3482.3 33.57
 13 10 0 -0.45 1.33
 13 -10 0 0.99 1.14
 14 10 0 1281.37 26.73
 14 -10 0 1298.19 21.53
 15 10 0 -1.09 1.31
 15 -10 0 1.91 1.15
 16 -10 0 42.8 4.17
 16 10 0 39.47 4.98
 17 -10 0 0.05 0.65
 17 10 0 -1.33 1.46
 18 -10 0 105.37 7.95
 18 -10 0 111.1 6.8
 18 10 0 116.34 8.84
 19 -10 0 2.17 1.31
 19 10 0 2.13 1.43
 19 -10 0 4.49 2.55
 20 -10 0 648.7 20.6
 20 -10 0 664.08 17.49
 20 10 0 668.17 22.15
 21 -10 0 0.18 0.99
 21 -10 0 0.97 1.86
 21 10 0 2.93 2.08
 22 10 0 796.9 25.49
 22 -10 0 801.96 23.48
 23 -10 0 7.43 3.41
 23 10 0 4.54 2.66
 24 -10 0 2275.92 40.81
 25 -10 0 -1.53 2.08
 26 -10 0 1456.01 33.68
 27 -10 0 -3.09 2.08
 28 -10 0 709.03 24.2
 29 -10 0 -2.69 2.68
 30 -10 0 4.79 2.8
 31 10 0 -0.48 3.16
 31 -10 0 0.79 1.89
 32 10 0 341.57 23.39
 32 -10 0 419.76 19.23
 33 -10 0 3.1 2.29
 34 -10 0 221.3 13.87
 35 -10 0 1.94 2.29
 36 -10 0 60.54 7.39
 37 -10 0 2.51 3.49
 38 -10 0 103.03 9.4
 39 -10 0 8.98 3.3
 40 -10 0 468.41 19.23
 41 -10 0 5.44 2.75
 42 -10 0 456.32 17.94
 43 -10 0 -4.3 2.21
 43 10 0 1.83 2.14
 44 -10 0 409.99 15.75
 44 10 0 440.95 17.75
 45 10 0 3.16 1.86
 0 11 0 -1.24 1.6
 -1 11 0 -0.71 1.55
 1 11 0 2.93 1.66
 -2 11 0 1.51 1.48
 2 -11 0 0.23 0.9
 2 11 0 0.32 1.28
 3 11 0 0.76 1.22
 3 -11 0 1.5 0.91
 -3 11 0 0.86 1.22
 -4 11 0 3.25 1.78
 4 11 0 2.46 2.38
 4 -11 0 4.82 1.7
 5 11 0 -0.92 1.24
 5 -11 0 0.6 1.32
 -5 11 0 0.75 1.1
 6 11 0 -0.07 1.61
 -6 11 0 0.33 0.86
 6 -11 0 -0.95 0.89
 7 11 0 9.39 2.71
 -7 11 0 3.31 1.85
 7 -11 0 5.55 1.97
 -8 11 0 -1.1 1.05
 8 11 0 0.06 1.39
 8 -11 0 -0.8 1.14
 9 11 0 14.54 4.22
 9 -11 0 11.84 2.84
 10 -11 0 0.32 0.8
 10 11 0 -1.38 1.52
 11 -11 0 15.53 3.23
 11 11 0 16.83 4.31
 12 11 0 -0.07 1.26
 12 -11 0 0.38 0.78
 13 -11 0 6.46 1.99
 13 11 0 5.26 2.66
 14 -11 0 3.66 1.56
 14 11 0 3.84 2.02
 15 11 0 0.72 1.74
 15 -11 0 0.52 1.05
 16 -11 0 -1.92 1.53
 16 -11 0 -2.09 1.44
 16 11 0 -0.72 1.8
 17 -11 0 2.56 1.81
 17 -11 0 0.8 1.41
 17 11 0 4.78 2.32
 17 -11 0 4.25 1.65
 18 11 0 0.89 1.31
 18 -11 0 1.12 1.3
 18 -11 0 1.03 1.85
 19 -11 0 1.07 1.62
 19 11 0 1.57 1.46
 19 -11 0 1.16 0.95
 20 -11 0 1.94 1.83
 20 11 0 0.08 1.61
 20 -11 0 1.35 1.23
 21 11 0 3.95 2.41
 21 -11 0 7.83 3.54
 22 -11 0 0.52 1.54
 22 11 0 -2.6 2.19
 23 11 0 4.3 3.15
 23 -11 0 8.96 4
 24 -11 0 2.33 2.09
 25 -11 0 11.12 4.24
 26 -11 0 -1.69 2.85
 27 -11 0 19.55 4.93
 28 -11 0 1.2 1.92
 29 -11 0 -0.99 1.94
 30 -11 0 1.92 2.15
 31 11 0 3.22 3.12
 31 -11 0 9.29 4.06
 32 -11 0 1.66 2.14
 33 -11 0 -3.2 2.07
 34 -11 0 -0.54 1.99
 35 -11 0 0.49 1.93
 36 -11 0 1.42 1.6
 37 -11 0 -1.31 1.59
 38 -11 0 2.77 2.74
 39 -11 0 2.97 2.18
 40 -11 0 4.08 2.37
 41 -11 0 10.9 3.75
 42 -11 0 0.6 1.46
 43 11 0 11.01 4.07
 43 -11 0 9.83 3.56
 44 -11 0 1.14 1.54
 44 11 0 -2.15 2.16
 45 11 0 6.45 2.96
 0 12 0 4103.24 49.27
 1 12 0 20.1 4.55
 -1 12 0 20.81 4.91
 2 12 0 20.65 3.64
 -2 12 0 19.69 3.48
 3 -12 0 -0.13 1.18
 -3 12 0 -1.59 2.05
 3 12 0 -0.61 1.46
 -4 12 0 44.54 4.94
 4 -12 0 32.89 3.5
 4 12 0 42.43 5.13
 5 12 0 1.79 1.51
 -5 12 0 1.3 1.42
 5 -12 0 1.59 1.1
 -6 12 0 196.95 9.56
 6 12 0 194.21 10.6
 6 -12 0 178.49 8.27
 7 -12 0 5.49 1.8
 -7 12 0 3.26 1.7
 7 12 0 3.01 2.01
 8 -12 0 1753.68 25.15
 8 12 0 1741.22 31.69
 9 -12 0 -0.22 0.79
 9 12 0 2.77 2.34
 10 12 0 1780.05 32.7
 10 -12 0 1772.7 25.7
 11 12 0 -2.4 1.7
 11 -12 0 1.94 1.09
 12 12 0 1174.03 26.92
 12 -12 0 1138.2 21.03
 13 -12 0 1.71 1.25
 13 12 0 0.56 1.25
 14 12 0 28.87 4.49
 14 -12 0 26.7 3.26
 15 12 0 -1.69 1.3
 15 -12 0 0.87 1.42
 15 -12 0 -0.34 1.35
 15 -12 0 -0.64 0.89
 16 -12 0 973.62 23.95
 16 -12 0 1012.79 21.12
 16 12 0 1009.72 26.8
 16 -12 0 973.34 24.95
 17 -12 0 2.75 2.25
 17 -12 0 4.14 1.83
 17 -12 0 6.09 2.77
 17 12 0 0.59 1.25
 18 -12 0 51.55 4.89
 18 -12 0 52.78 5.94
 19 -12 0 0.39 1.6
 19 12 0 1.03 2.12
 19 -12 0 1.47 1.2
 20 12 0 18 4.01
 20 -12 0 15.05 3.16
 21 12 0 8.12 3.45
 21 -12 0 8.98 3.41
 22 -12 0 168.1 11.53
 22 12 0 172.1 12.52
 23 12 0 4.46 2.65
 23 -12 0 5.7 2.76
 24 -12 0 300.35 15.19
 25 -12 0 4.11 2.73
 26 -12 0 397.73 17.93
 27 -12 0 3.29 2.42
 28 -12 0 11.98 3.63
 29 -12 0 1.07 2.2
 30 -12 0 13.98 3.78
 31 -12 0 6.2 3.3
 32 -12 0 23.51 4.44
 33 -12 0 9.15 3.75
 34 -12 0 54.82 7.31
 35 -12 0 7.49 3.39
 36 -12 0 24.94 4.98
 37 -12 0 4.47 3.06
 38 -12 0 11.24 3.28
 39 -12 0 5.16 2.69
 40 -12 0 11.39 3.33
 41 -12 0 6.38 2.35
 42 -12 0 118.08 8.91
 43 12 0 -1.49 1.78
 43 -12 0 6.15 2.59
 44 12 0 100.94 8.38
 0 13 0 -0.28 1.51
 -1 13 0 58.11 7.19
 1 13 0 57.71 7.09
 -2 13 0 4.9 2.7
 2 13 0 3.56 2.09
 -3 13 0 8.5 3.09
 3 13 0 10.71 2.86
 4 -13 0 1.64 1.08
 4 13 0 -0.26 1.42
 -4 13 0 1.16 1.55
 5 -13 0 7.05 1.98
 -5 13 0 6.04 2.46
 5 13 0 8.3 2.91
 -6 13 0 14.94 3.56
 6 -13 0 11.2 2.9
 6 13 0 13.73 4.13
 -7 13 0 0.49 0.96
 7 -13 0 -1.33 1.44
 7 13 0 -0.56 1.71
 8 13 0 2.25 2.13
 8 -13 0 1.46 1.27
 9 13 0 2.59 2.13
 9 -13 0 0.22 0.91
 10 -13 0 0.46 0.72
 10 13 0 2.5 1.76
 11 -13 0 -0.11 0.81
 11 13 0 1.23 1.75
 12 -13 0 0.2 0.74
 12 -13 0 0.01 1.54
 12 13 0 2.5 1.95
 13 -13 0 2.1 1.9
 13 -13 0 0.49 2.05
 13 -13 0 0.87 0.91
 13 -13 0 0.82 1.28
 13 13 0 -0.83 1.74
 14 -13 0 0.01 0.75
 14 13 0 -2.43 2.58
 14 -13 0 -0.49 1.99
 14 -13 0 2.68 1.98
 14 -13 0 2.65 1.77
 15 -13 0 9.77 2.56
 15 -13 0 6.89 2.75
 15 -13 0 11.6 3.45
 15 13 0 8.38 3.34
 16 -13 0 1.3 1.08
 16 13 0 0.49 1.79
 16 -13 0 1.63 1.24
 16 -13 0 0.17 1.72
 17 -13 0 6.36 2.92
 17 13 0 3.27 2.44
 17 -13 0 3.32 1.74
 18 13 0 3.31 1.8
 18 -13 0 4.6 2.4
 19 13 0 7.88 3.09
 19 -13 0 4.95 2.66
 20 13 0 -1.56 2.42
 20 -13 0 -0.54 1.7
 21 13 0 -1.39 1.61
 21 -13 0 1.13 2.43
 22 -13 0 6.06 2.66
 22 13 0 4.98 3.01
 23 -13 0 1.09 1.96
 23 13 0 0.96 2.15
 24 -13 0 2.01 2.09
 25 -13 0 0.45 1.76
 26 -13 0 2.63 1.89
 27 -13 0 0.7 2.03
 28 -13 0 2.13 2.67
 29 -13 0 -0.44 1.85
 30 -13 0 5.03 2.4
 31 -13 0 8.23 3.22
 32 -13 0 2.75 1.88
 33 -13 0 8.96 3.38
 34 -13 0 2.75 2.23
 35 -13 0 11.68 4.22
 36 -13 0 4.77 2.78
 37 -13 0 3.67 2.77
 38 -13 0 4.71 2.66
 39 -13 0 3.07 2.19
 40 -13 0 4.7 2.46
 41 -13 0 3.83 1.69
 42 -13 0 3.39 1.73
 43 -13 0 1.41 1.55
 44 13 0 1.2 1.23
 0 14 0 3903.98 56.5
 -1 14 0 1.04 1.71
 1 14 0 1.36 1.64
 2 14 0 2686.69 45.8
 -2 14 0 2693.26 45.62
 3 14 0 -2.48 2.88
 -3 14 0 -1.08 2.03
 -4 14 0 1906.2 36.88
 4 14 0 1817.46 37.27
 5 14 0 0.14 1.63
 -5 14 0 4.13 2.62
 6 14 0 364.67 16.75
 6 -14 0 376.35 12.88
 -6 14 0 381.23 14.81
 7 -14 0 4.68 1.83
 7 14 0 1.69 1.88
 8 14 0 0.35 1.92
 8 -14 0 1.33 0.96
 9 -14 0 0.96 1.02
 9 14 0 0.13 1.31
 9 -14 0 0.63 1.49
 10 -14 0 11.28 2.18
 10 -14 0 12.79 2.99
 10 -14 0 7.45 2.49
 10 14 0 12.32 3.26
 10 -14 0 13.03 3.42
 11 -14 0 -0.63 0.9
 11 -14 0 0.88 2.31
 11 -14 0 0.75 1.13
 11 14 0 2.13 2
 11 -14 0 0.81 1.67
 12 14 0 254 13.84
 12 -14 0 241.43 11.77
 12 -14 0 245.99 13.14
 12 -14 0 237.68 10.59
 12 -14 0 257.87 12.56
 13 -14 0 -0.22 1.43
 13 -14 0 -3.79 3.05
 13 14 0 0.31 1.89
 13 -14 0 -0.45 1.93
 13 -14 0 0.47 1.23
 14 14 0 943.96 27.31
 14 -14 0 907.88 23.5
 14 -14 0 937.74 25.16
 14 -14 0 952.23 21.47
 14 -14 0 971.78 26.6
 15 14 0 -0.04 1.82
 15 -14 0 -1.1 1.19
 15 -14 0 -0.76 2.66
 15 -14 0 2.43 2.04
 16 -14 0 835.8 20.76
 16 14 0 827.12 26.23
 16 -14 0 859.06 23.25
 16 -14 0 864.89 24.92
 17 -14 0 2.63 1.85
 17 14 0 0.73 1.49
 18 14 0 804.94 26.54
 18 -14 0 793.25 23.18
 19 14 0 -1.12 2.1
 19 -14 0 3.05 2.45
 20 14 0 408.7 19.78
 20 -14 0 422.61 17.68
 21 14 0 -1.57 2.21
 21 -14 0 2.18 1.76
 22 14 0 81.41 9.13
 22 -14 0 75.8 8.05
 23 14 0 0.59 1.91
 23 -14 0 3.44 2.23
 24 -14 0 8.19 2.73
 25 -14 0 1.06 2.35
 26 -14 0 261.37 15.08
 27 -14 0 2.08 1.95
 28 -14 0 44.59 6.53
 29 -14 0 -0.92 2
 30 -14 0 566.45 22.24
 31 -14 0 1.01 1.77
 32 -14 0 511.97 21.02
 33 -14 0 0.9 1.43
 34 -14 0 637.16 23.16
 35 -14 0 2.42 1.57
 36 -14 0 464.67 19.49
 37 -14 0 3.81 2.7
 38 -14 0 137.46 10.44
 39 -14 0 2.26 1.42
 40 -14 0 32.67 5.12
 41 -14 0 6.83 2.14
 42 -14 0 4.91 2.21
 0 15 0 -3.95 2.67
 -1 15 0 17.06 5.23
 1 15 0 24.75 6.02
 2 15 0 0 2.26
 -2 15 0 4.68 2.39
 -3 15 0 25.28 6.34
 3 15 0 31.95 7.47
 4 15 0 3.32 2.11
 -4 15 0 -0.14 1.37
 -5 15 0 13.47 3.98
 5 15 0 16.49 4.66
 5 -15 0 29.71 4.8
 5 -15 0 18.74 4.19
 6 -15 0 0.07 1.42
 6 -15 0 -0.37 1.28
 6 -15 0 -2.74 1.8
 7 15 0 5.01 2.39
 7 -15 0 7.86 2.63
 7 -15 0 8.15 2.49
 7 -15 0 7.28 2.26
 7 -15 0 6.92 1.91
 8 15 0 6.03 2.9
 8 -15 0 9.4 3.39
 8 -15 0 4.12 1.72
 8 -15 0 5.19 1.99
 8 -15 0 10.34 3.32
 9 -15 0 0.54 0.95
 9 15 0 4.05 2.16
 9 -15 0 1.71 1.55
 9 -15 0 0.59 1.27
 9 -15 0 1.79 2.31
 10 -15 0 -1.59 1.89
 10 -15 0 -0.02 1.8
 10 -15 0 0.87 1.54
 10 15 0 1.09 1.37
 10 -15 0 -0.44 0.83
 11 -15 0 2.58 1.9
 11 -15 0 0.06 0.78
 11 -15 0 4.96 1.91
 11 -15 0 2.83 2.83
 11 15 0 -2.1 2.09
 12 15 0 2.96 2.69
 12 -15 0 -1.84 1.68
 12 -15 0 -0.47 0.82
 12 -15 0 -0.11 1.58
 12 -15 0 3.1 2.37
 13 15 0 15.7 4.38
 13 -15 0 18.96 4.99
 13 -15 0 17.76 3.99
 13 -15 0 11.66 3.53
 13 -15 0 8.38 3.32
 14 -15 0 -0.45 1.28
 14 15 0 -1.01 1.9
 14 -15 0 2.11 2.01
 14 -15 0 0.44 2.35
 14 -15 0 1.33 2.49
 15 -15 0 14.05 3.8
 15 -15 0 15.88 3.48
 15 -15 0 16.88 4.16
 15 15 0 18.3 5.19
 16 15 0 5.97 3.08
 16 -15 0 21.1 4.45
 17 15 0 13.87 3.97
 17 -15 0 20.26 4.8
 18 15 0 -2.48 2.4
 18 -15 0 -5.01 2.85
 19 15 0 8.97 3.42
 19 -15 0 14.53 4.05
 20 15 0 6.05 2.81
 20 -15 0 1.84 2.21
 21 15 0 5.31 3.12
 21 -15 0 2.23 1.87
 22 15 0 5.39 3.34
 22 -15 0 6.73 3.36
 23 -15 0 3.19 2.22
 24 -15 0 0.48 2.24
 25 -15 0 5.89 2.8
 26 -15 0 7.22 3.25
 27 -15 0 3.07 3.02
 28 -15 0 0.97 2.13
 29 -15 0 11.92 4.25
 30 -15 0 6.58 3.07
 31 -15 0 13.65 4.8
 32 -15 0 0.91 1.72
 33 -15 0 38.93 7.11
 34 -15 0 7.3 2.91
 35 -15 0 49.78 6.95
 36 -15 0 4.76 2.45
 37 -15 0 22.73 4.65
 38 -15 0 4.2 2.25
 39 -15 0 4.89 2.16
 40 -15 0 1.57 2.05
 41 -15 0 -1.39 1.46
 0 16 0 1470.68 39.3
 0 -16 0 1462.69 30.24
 1 16 0 -4.84 2.87
 -1 16 0 -1.01 2.74
 -1 -16 0 1.76 2.34
 1 -16 0 -2.4 1.98
 1 -16 0 -1.1 2
 1 -16 0 -2.65 2.41
 -2 16 0 1545.84 39.38
 -2 -16 0 1591.88 31.65
 2 -16 0 1536.93 30.64
 2 16 0 1579.95 41.21
 2 -16 0 1587.18 33.37
 3 -16 0 0.22 2.06
 3 16 0 0.31 2.43
 -3 -16 0 1.7 1.98
 3 -16 0 0.12 1.78
 -3 16 0 3.89 3.27
 3 -16 0 -0.12 2.64
 4 -16 0 1899.92 36.49
 -4 16 0 1869.02 40.32
 4 -16 0 1877.66 33.97
 4 -16 0 1873.59 34.3
 5 -16 0 4.5 1.96
 5 -16 0 4.36 2.97
 5 -16 0 6.19 2.89
 5 16 0 5.32 3.57
 6 -16 0 365.08 16.23
 6 -16 0 383.1 15.69
 6 -16 0 374.47 14.92
 6 16 0 408.13 20.15
 7 -16 0 -0.7 1.46
 7 -16 0 -0.95 2.55
 7 -16 0 -2.59 2.25
 7 16 0 0.17 1.53
 8 -16 0 129.81 9
 8 16 0 119.13 10.83
 8 -16 0 108.41 9.05
 8 -16 0 112.67 8.2
 9 -16 0 2.72 2.06
 9 -16 0 6.57 3.19
 9 -16 0 4.02 2.18
 10 -16 0 98.31 7.9
 10 16 0 85.75 9.14
 10 -16 0 75.71 7.01
 10 -16 0 77.57 6.74
 10 -16 0 80.56 8.24
 11 -16 0 2.52 1.79
 11 -16 0 7.37 2.75
 11 16 0 2.47 2.33
 11 -16 0 6.41 3.29
 11 -16 0 11.21 3.94
 12 -16 0 702.27 21.24
 12 -16 0 772.17 24.47
 12 -16 0 783.52 21.07
 12 16 0 805.55 27.36
 12 -16 0 780.27 22.97
 13 -16 0 0.21 1.16
 13 16 0 -1.98 2.46
 13 -16 0 0.19 1.73
 13 -16 0 5.01 2.49
 13 -16 0 -1.7 2.25
 14 16 0 638.47 24.65
 14 -16 0 638.44 23.15
 14 -16 0 642.7 20.61
 14 -16 0 618.65 19.17
 14 -16 0 652.1 21.86
 15 -16 0 6.56 3.1
 15 16 0 4.74 2.48
 16 16 0 1682.47 40.09
 16 -16 0 1662.79 34.49
 17 16 0 0.81 1.69
 17 -16 0 5.13 3.5
 18 -16 0 632.54 21.62
 18 16 0 596.56 24.34
 19 -16 0 -2.5 1.75
 19 16 0 2.24 2.48
 20 16 0 341.22 19.02
 20 -16 0 406.6 17.67
 21 -16 0 3.35 2.2
 21 16 0 1.96 2.63
 22 -16 0 50.86 6.61
 23 -16 0 -0.28 2.53
 24 -16 0 203.15 13.48
 25 -16 0 -1.85 2.42
 26 -16 0 27.01 4.81
 27 -16 0 -3.49 2.87
 28 -16 0 222.91 14.13
 29 -16 0 2.83 2.21
 30 -16 0 434.72 19.49
 31 -16 0 2.21 1.59
 32 -16 0 927.09 28.01
 33 -16 0 -3.71 2.58
 34 -16 0 1049.63 29.44
 35 -16 0 -1.33 1.96
 36 -16 0 525.28 20.09
 37 -16 0 0.92 1.55
 38 -16 0 145.85 10.25
 39 -16 0 3.56 2.22
 40 -16 0 18.08 3.55
 41 -16 0 0.44 0.95
 0 17 0 -4.24 2.51
 0 -17 0 -1.75 1.92
 0 -17 0 -0.76 1.4
 -1 17 0 22.32 6.3
 1 17 0 18.98 5.99
 1 -17 0 30.35 6.12
 -1 -17 0 40.86 6.43
 -1 -17 0 43.06 6.14
 1 -17 0 31.9 5.56
 1 -17 0 46.27 6.82
 2 17 0 -2.94 2.83
 -2 17 0 1.28 1.93
 2 -17 0 -1.8 2.11
 2 -17 0 -2.05 1.45
 -2 -17 0 -0.73 2.4
 2 -17 0 -1.19 1.54
 -2 -17 0 -2.33 1.85
 3 -17 0 22.69 4.97
 3 -17 0 16.37 3.82
 3 17 0 14.8 4.83
 3 -17 0 18.56 4.48
 -3 -17 0 19.7 4.28
 -3 17 0 7.38 3.48
 -4 -17 0 -1.37 1.54
 4 17 0 -0.72 2.14
 4 -17 0 -2.12 1.92
 4 -17 0 2.81 1.73
 4 -17 0 -2.25 2.87
 5 -17 0 7.98 2.89
 5 -17 0 11.24 3.89
 5 17 0 6.6 3.98
 5 -17 0 13.04 4.09
 6 -17 0 3.66 1.7
 6 -17 0 6.02 2.22
 6 17 0 7.29 3.46
 6 -17 0 1.99 1.83
 7 17 0 0.93 2.26
 7 -17 0 -2.03 1.6
 7 -17 0 -2.16 2.6
 7 -17 0 2.51 1.88
 8 -17 0 -0.31 1.93
 8 17 0 -1.32 2.21
 8 -17 0 1.3 2.4
 8 -17 0 -0.5 1.87
 9 -17 0 2.32 1.96
 9 -17 0 3.25 2.73
 9 -17 0 -0.49 1.69
 9 17 0 1.59 1.76
 10 17 0 1.55 2.24
 10 -17 0 -4.5 3.52
 10 -17 0 1.59 1.75
 10 -17 0 1.38 2.04
 11 -17 0 7.2 3.09
 11 17 0 3.82 1.88
 11 -17 0 11.95 3.13
 11 -17 0 6.1 3.35
 12 -17 0 -1.47 2.1
 12 17 0 -4.99 2.86
 12 -17 0 -1.89 1.66
 12 -17 0 -0.75 2.03
 13 17 0 10.08 3.91
 13 -17 0 17.04 4.71
 13 -17 0 10.88 3.54
 13 -17 0 8.05 3.22
 14 -17 0 0.81 2.46
 14 -17 0 2.54 1.83
 14 17 0 0.84 2.2
 15 -17 0 22.94 4.55
 15 17 0 17.81 5.11
 16 17 0 -4.53 2.78
 16 -17 0 2.25 2.28
 17 17 0 17.94 5.47
 17 -17 0 19.3 4.67
 18 -17 0 1.47 1.92
 18 17 0 4.22 2.12
 19 17 0 10.7 4.05
 19 -17 0 13.15 4.48
 20 -17 0 3.15 2.82
 20 17 0 -1.92 2.52
 21 -17 0 6.08 3.12
 22 -17 0 1.11 1.53
 23 -17 0 5.02 2.86
 24 -17 0 5.56 3.03
 25 -17 0 -2.49 1.84
 26 -17 0 2.46 2.08
 27 -17 0 5.46 2.91
 28 -17 0 1.96 2.31
 29 -17 0 4.47 2.97
 30 -17 0 1.47 2.11
 31 -17 0 22.72 4.86
 32 -17 0 -0.88 2.11
 33 -17 0 45.54 6.59
 34 -17 0 3.09 2.14
 35 -17 0 21.4 5.03
 36 -17 0 7.13 2.57
 37 -17 0 9.63 3.39
 38 -17 0 0.94 1.75
 39 -17 0 -1.09 1.51
 40 -17 0 0.49 1.05
 0 -18 0 1875.15 38.75
 0 -18 0 1702.16 34.93
 0 18 0 1884.58 50.05
 0 -18 0 1742.99 34.91
 -1 -18 0 4.66 2.34
 1 -18 0 4.62 2.74
 -1 18 0 1.87 2.93
 1 -18 0 0.06 2.22
 -1 -18 0 3.24 1.88
 1 18 0 3.43 2.81
 1 -18 0 3.1 1.99
 2 18 0 643.08 30.34
 2 -18 0 610.35 20.84
 -2 18 0 615.12 27.09
 2 -18 0 616.3 20.46
 2 -18 0 653.31 22.78
 3 18 0 3.37 2.93
 3 -18 0 -3.45 2.59
 3 -18 0 0.67 1.81
 3 -18 0 -2.9 2.53
 4 -18 0 211.85 12.07
 4 -18 0 214.81 12.52
 4 -18 0 197.17 12.9
 4 18 0 226.85 17.9
 5 -18 0 2.72 3.03
 5 18 0 2.83 2.28
 5 -18 0 -0.88 2.35
 5 -18 0 -3.9 2.43
 6 -18 0 92.38 9.17
 6 -18 0 94.84 8.45
 6 18 0 93.24 11.22
 6 -18 0 86.33 7.68
 7 -18 0 3.71 2.79
 7 -18 0 -0.17 1.58
 7 18 0 3.8 3.57
 7 -18 0 1.79 2.24
 8 -18 0 19.54 4.68
 8 -18 0 18.61 4.07
 8 18 0 29.65 6.4
 8 -18 0 20.4 4.27
 9 18 0 3.67 2.65
 9 -18 0 1.53 2.12
 9 -18 0 2.6 2.03
 9 -18 0 5.1 3.46
 10 18 0 84.14 9.88
 10 -18 0 80.44 8.73
 10 -18 0 89.08 8.36
 10 -18 0 77.11 7.67
 11 -18 0 1.67 2.16
 11 18 0 0.48 2.29
 11 -18 0 3.67 2.94
 12 18 0 72.18 9.18
 12 -18 0 58.49 6.86
 12 -18 0 80.33 8.71
 13 18 0 2.29 2.81
 13 -18 0 3.56 2.47
 13 -18 0 0.74 2.91
 14 -18 0 322.21 15.41
 14 -18 0 344.99 17.71
 14 18 0 325.96 19.46
 15 18 0 -1.46 2.15
 15 -18 0 1.57 2.34
 16 18 0 325.89 19.34
 16 -18 0 313.57 15.53
 17 18 0 1.12 2.15
 17 -18 0 1.2 2.42
 18 18 0 442.01 23.01
 18 -18 0 457.92 19.32
 19 -18 0 2.7 2.55
 19 18 0 -1.45 2.63
 20 -18 0 47.56 6.39
 21 -18 0 0.13 1.94
 22 -18 0 70.54 7.9
 23 -18 0 -0.31 1.54
 24 -18 0 42.44 6.44
 25 -18 0 -2.43 2.18
 26 -18 0 1.66 1.9
 27 -18 0 4.44 2.48
 28 -18 0 0 1.87
 29 -18 0 1.96 2.18
 30 -18 0 164.73 12
 31 -18 0 5.37 2.59
 32 -18 0 645.19 22.94
 33 -18 0 -0.55 1.49
 34 -18 0 494.18 19.1
 35 -18 0 -0.58 1.25
 36 -18 0 283.6 13.67
 37 -18 0 0.4 1.1
 38 -18 0 30.82 4.36
 39 -18 0 -0.81 1.02
 0 -19 0 -1.88 2.31
 0 19 0 -5.76 4.31
 0 -19 0 0.4 2.41
 -1 -19 0 57.34 7.28
 -1 -19 0 57.25 7.78
 1 19 0 43.77 10.67
 1 -19 0 54.67 7.01
 1 -19 0 41.56 7.18
 2 -19 0 -3.82 2.94
 2 19 0 1.9 2.83
 2 -19 0 -1.27 2.31
 3 -19 0 19.53 4.8
 3 19 0 9.98 6.08
 3 -19 0 19.77 4.31
 4 19 0 3.44 2.91
 4 -19 0 -0.28 1.86
 4 -19 0 -2 2.71
 4 -19 0 2.26 1.57
 5 19 0 1.69 3.01
 5 -19 0 0.23 1.95
 5 -19 0 -1.24 1.59
 5 -19 0 -2.59 2.72
 6 19 0 -0.78 2.51
 6 -19 0 3.74 3.05
 6 -19 0 3.8 2.41
 7 19 0 -1.06 3.42
 7 -19 0 -2.15 2.8
 7 -19 0 0.31 1.87
 8 -19 0 -1.39 2.33
 8 -19 0 -1.01 1.54
 8 19 0 -0.15 2.07
 9 -19 0 -0.23 1.85
 9 -19 0 -2.66 3.65
 9 19 0 4.33 3.36
 10 -19 0 2.65 2.65
 10 -19 0 -2 2.01
 10 19 0 1.18 1.95
 11 19 0 0.49 2.05
 11 -19 0 6.06 3.26
 11 -19 0 1.45 2.04
 12 -19 0 3.78 3.71
 12 19 0 2.6 2.43
 12 -19 0 1.17 2.12
 13 -19 0 1.15 1.63
 13 19 0 -0.34 1.94
 14 19 0 -4.41 3.27
 14 -19 0 1.39 1.81
 14 -19 0 1.49 2.42
 15 -19 0 4.23 2.29
 15 19 0 4.24 3.26
 16 -19 0 7.6 2.98
 16 19 0 -2.67 2.35
 17 -19 0 9.1 3.26
 17 19 0 10.26 4.09
 18 -19 0 3.73 2.43
 18 19 0 -1.97 2.98
 19 -19 0 11.81 3.66
 20 -19 0 -0.58 2.42
 21 -19 0 3.97 2.58
 22 -19 0 4.29 2.55
 23 -19 0 5.61 3.35
 24 -19 0 1.78 2.24
 25 -19 0 1.83 2.19
 26 -19 0 -2.06 2.25
 27 -19 0 4.64 2.5
 28 -19 0 -0.23 1.44
 29 -19 0 -1.32 1.97
 30 -19 0 1.94 1.84
 31 -19 0 9.67 3.89
 32 -19 0 2.69 2.33
 33 -19 0 10.53 3.31
 34 -19 0 1.38 2.04
 35 -19 0 10.74 3.3
 36 -19 0 -2.14 1.92
 37 -19 0 2.74 1.77
 38 -19 0 3.12 1.74
 0 -20 0 612.34 23.84
 0 -20 0 613.12 21.43
 -1 -20 0 -5.39 3.91
 1 -20 0 -3.73 3.77
 2 20 0 418.64 27.17
 -2 -20 0 434.77 19.85
 2 -20 0 440.29 20.09
 2 -20 0 395.62 17.41
 3 -20 0 13.28 3.46
 3 20 0 7.88 5.09
 3 -20 0 18.73 5.14
 4 -20 0 7.73 2.64
 4 20 0 5.45 4.08
 4 -20 0 2.18 2.42
 5 -20 0 2.75 3.42
 5 20 0 -4.27 4
 5 -20 0 3.85 2.54
 6 20 0 141.7 15.37
 6 -20 0 133.93 11.6
 6 -20 0 118.38 9.27
 7 20 0 -7.85 4.55
 7 -20 0 -3.31 2.82
 7 -20 0 0.44 1.83
 8 20 0 126.97 13.82
 8 -20 0 106.69 9.02
 8 -20 0 127.61 11.58
 9 -20 0 0.42 1.93
 9 -20 0 -4.87 3.46
 9 20 0 -4.69 4.41
 10 -20 0 38.78 6.73
 10 -20 0 35.59 5.55
 10 20 0 47.76 8.58
 11 20 0 2.57 3.2
 11 -20 0 5.3 2.74
 11 -20 0 1 2.75
 12 -20 0 10.94 3.22
 12 -20 0 6.74 2.58
 12 20 0 7.7 4.27
 13 -20 0 4.03 3.44
 13 20 0 1.33 2.22
 13 -20 0 0.16 1.63
 14 -20 0 10.27 3.29
 14 20 0 8.53 4.41
 15 -20 0 -0.73 1.71
 15 20 0 2.72 3.28
 16 -20 0 52.04 6.86
 16 20 0 65.81 9.61
 17 -20 0 -1.06 2.07
 18 -20 0 26.09 4.93
 19 -20 0 7.19 3.59
 20 -20 0 221.16 13.96
 21 -20 0 9.29 3.56
 22 -20 0 67.72 7.81
 23 -20 0 -4.24 2.3
 24 -20 0 85.83 8.7
 25 -20 0 0.81 2.01
 26 -20 0 163.26 11.99
 27 -20 0 0.98 1.74
 28 -20 0 52.38 6.8
 29 -20 0 4.45 2.26
 30 -20 0 21.17 4.55
 31 -20 0 5.04 2.4
 32 -20 0 82.41 7.9
 33 -20 0 -0.5 1.21
 34 -20 0 151.87 9.91
 35 -20 0 1.67 1.67
 36 -20 0 52.59 5.54
 37 -20 0 0.14 1.27
 0 -21 0 -3.31 3.4
 -1 -21 0 6.57 3.58
 1 -21 0 0.77 2.26
 -2 -21 0 2.55 2.55
 2 -21 0 0.03 2.75
 2 -21 0 4.67 2.98
 3 21 0 -0.81 3.26
 -3 -21 0 2.44 2.57
 3 -21 0 -1.76 2.36
 3 -21 0 3.69 2.62
 4 -21 0 3.5 2.42
 4 21 0 0.19 3.05
 -4 -21 0 1.44 2.45
 4 -21 0 2.58 2.1
 5 -21 0 1.45 1.83
 5 -21 0 5.87 3.38
 5 21 0 -0.02 3.45
 6 21 0 4.08 4.76
 6 -21 0 -0.88 3.02
 6 -21 0 1.83 1.83
 7 -21 0 5.85 2.37
 7 21 0 14.31 6.09
 7 -21 0 16.94 5.21
 8 21 0 -4.62 4.91
 8 -21 0 -5.2 2.72
 8 -21 0 1.72 2.84
 9 21 0 5.5 3.19
 9 -21 0 7.37 3.18
 9 -21 0 6.76 4.13
 10 21 0 2.85 5.03
 10 -21 0 8.89 4.31
 10 -21 0 0.49 1.98
 11 -21 0 -1.72 1.94
 11 21 0 -0.17 2.37
 12 -21 0 1.58 1.71
 12 -21 0 -0.08 2.48
 12 21 0 -1.54 2.38
 13 -21 0 -1.34 1.86
 13 -21 0 2.51 3.05
 14 -21 0 1.34 1.75
 15 -21 0 1.15 2.37
 16 -21 0 -1.18 1.81
 17 -21 0 4.33 2.67
 18 -21 0 2.37 2.39
 19 -21 0 5.38 2.96
 20 -21 0 5.73 2.59
 21 -21 0 -0.73 2.04
 22 -21 0 4.46 2.94
 23 -21 0 10.79 3.51
 24 -21 0 1.27 1.79
 25 -21 0 13.02 3.88
 26 -21 0 -0.54 1.66
 27 -21 0 10.4 3.29
 28 -21 0 3.28 2.03
 29 -21 0 2.01 1.96
 30 -21 0 -0.59 1.35
 31 -21 0 2.3 1.81
 32 -21 0 -0.14 1.21
 33 -21 0 3.93 1.92
 34 -21 0 0.34 1.08
 35 -21 0 2.6 1.66
 36 -21 0 2.37 1.62
 0 -22 0 122.99 11.33
 -1 -22 0 0.25 2.55
 1 -22 0 -6.7 3.53
 -2 -22 0 32.7 6.21
 2 -22 0 20.86 4.53
 3 -22 0 6.22 2.81
 3 -22 0 3.8 2.44
 -3 -22 0 2.04 2.75
 4 -22 0 69.7 7.57
 -4 -22 0 80.81 9.05
 4 -22 0 68.15 9.81
 5 -22 0 0.08 1.82
 -5 -22 0 1.81 3.76
 5 -22 0 -2.81 3.37
 6 -22 0 301.45 19.09
 -6 -22 0 323.96 17.91
 6 -22 0 282.98 15.03
 7 -22 0 3.46 2.82
 7 -22 0 1.54 3.63
 8 -22 0 468.44 22.47
 8 -22 0 394.73 17.65
 9 -22 0 10.25 3.53
 9 -22 0 3.12 3.18
 10 -22 0 143.37 10.65
 10 -22 0 148.79 12.91
 11 -22 0 5.7 3.74
 11 -22 0 -0.05 2.48
 12 -22 0 99.64 9.03
 12 -22 0 100.71 10.83
 13 -22 0 6.1 3.22
 14 -22 0 2.85 2.81
 15 -22 0 -2.94 2.77
 16 -22 0 4.05 2.29
 17 -22 0 4.19 2.34
 18 -22 0 15.9 4.09
 19 -22 0 -2.12 2
 20 -22 0 45.46 6.26
 21 -22 0 -2.34 2.38
 22 -22 0 13.88 3.51
 23 -22 0 4.79 3.01
 24 -22 0 252.78 14.56
 25 -22 0 -3.75 2.04
 26 -22 0 268.83 14.71
 27 -22 0 0.55 1.71
 28 -22 0 135.84 10.24
 29 -22 0 1.3 1.67
 30 -22 0 32.54 4.93
 31 -22 0 -0.45 1.41
 32 -22 0 6.96 2.78
 33 -22 0 -1.95 1.57
 34 -22 0 19.53 3.68
 0 -23 0 4.29 2.82
 1 -23 0 -4.67 3.82
 -1 -23 0 1.48 2.23
 2 -23 0 2.73 2.64
 -2 -23 0 1.14 2.49
 3 -23 0 9.72 4.42
 -3 -23 0 0.21 2.24
 4 -23 0 -1.42 1.95
 -4 -23 0 0.62 2.14
 -5 -23 0 7.12 3.76
 5 -23 0 4.97 5.05
 5 -23 0 9.77 3.29
 -6 -23 0 -1.25 2.19
 6 -23 0 3.17 2.31
 6 -23 0 0.35 2.57
 7 -23 0 10.04 3.43
 7 -23 0 17.07 5.67
 -8 -23 0 0.81 3.26
 8 -23 0 -3.53 2.84
 8 -23 0 5.95 2.99
 9 -23 0 12.62 5.19
 9 -23 0 9 3.63
 10 -23 0 1.51 2.43
 10 -23 0 1.42 1.91
 11 -23 0 2.17 2.94
 11 -23 0 7.49 3.47
 12 -23 0 -0.05 3.1
 12 -23 0 1.6 1.71
 13 -23 0 3.31 2.74
 14 -23 0 3.52 2.44
 15 -23 0 4.22 2.38
 16 -23 0 3.45 2.33
 17 -23 0 2.96 2.65
 18 -23 0 2.11 2.3
 19 -23 0 4.82 2.75
 20 -23 0 5.67 1.85
 21 -23 0 5.24 2.7
 22 -23 0 -1.03 1.75
 23 -23 0 5.06 2.71
 24 -23 0 -2.32 2.2
 25 -23 0 15.45 4.07
 26 -23 0 6.12 2.54
 27 -23 0 10.72 3.62
 28 -23 0 -3.77 2.35
 29 -23 0 10.71 3.3
 30 -23 0 7.83 2.57
 31 -23 0 -0.29 1.76
 32 -23 0 1.8 1.59
 33 -23 0 0.28 1.03
 0 -24 0 20.26 5.11
 -1 -24 0 -2.4 2.83
 1 -24 0 1.37 2.82
 2 -24 0 8.37 3.98
 -2 -24 0 23.07 5.62
 3 -24 0 0.66 2.8
 -3 -24 0 3.06 4.28
 -4 -24 0 95.48 10.06
 4 -24 0 85.41 10.42
 -5 -24 0 -2.9 2.19
 5 -24 0 -6.71 4.16
 6 -24 0 365.43 20.97
 6 -24 0 311.24 16.04
 -6 -24 0 338.89 18.58
 -7 -24 0 5.88 6.35
 7 -24 0 -2.58 3.67
 7 -24 0 10.65 4.41
 -8 -24 0 465.64 21.96
 8 -24 0 415.73 18.53
 8 -24 0 460.37 22.9
 9 -24 0 -2.03 3.55
 9 -24 0 9.17 6.23
 -9 -24 0 7.58 5.59
 10 -24 0 375.87 20.87
 -10 -24 0 362.98 19.02
 10 -24 0 323.62 16.24
 11 -24 0 13.38 5.23
 -11 -24 0 8.08 5.93
 11 -24 0 1.77 2.78
 12 -24 0 116.88 9.82
 13 -24 0 3.47 3.46
 14 -24 0 19.47 4.35
 15 -24 0 -0.32 1.79
 16 -24 0 3.02 2.25
 17 -24 0 2 1.76
 18 -24 0 28.9 5.19
 19 -24 0 2.07 2.48
 20 -24 0 54.19 7.22
 21 -24 0 -0.37 2.05
 22 -24 0 123.55 10.1
 23 -24 0 -2.12 1.47
 24 -24 0 144.95 10.87
 25 -24 0 1.86 1.55
 26 -24 0 315.92 15.18
 27 -24 0 3.22 2.07
 28 -24 0 126.6 9.3
 29 -24 0 2.69 1.47
 30 -24 0 31.1 4.51
 31 -24 0 3.44 1.73
 32 -24 0 1.35 1.32
 0 -25 0 2.88 2.52
 -1 -25 0 1.1 2.4
 1 -25 0 -0.62 2.54
 2 -25 0 -2.14 2.56
 -2 -25 0 1.58 3.63
 -3 -25 0 -2.14 2.4
 3 -25 0 6.64 3.61
 -4 -25 0 2.01 3.36
 4 -25 0 -2.62 2.85
 -5 -25 0 10.7 4.95
 5 -25 0 1.05 4.09
 6 -25 0 -2.09 2.73
 -6 -25 0 4.29 3.63
 -7 -25 0 12.86 4.64
 7 -25 0 19.58 5.49
 8 -25 0 2.83 2.54
 8 -25 0 0.57 2.72
 -8 -25 0 -3.98 2.8
 9 -25 0 17.28 4.31
 -9 -25 0 20.88 5.32
 9 -25 0 12.8 4.79
 -10 -25 0 -3.92 3.71
 10 -25 0 2.84 1.88
 10 -25 0 2.45 3.21
 11 -25 0 7.48 3.99
 11 -25 0 3.69 2.04
 -11 -25 0 2.79 2.09
 -12 -25 0 0.94 2.75
 12 -25 0 -1.56 2.33
 13 -25 0 2.8 2.3
 -13 -25 0 6.3 3.31
 -14 -25 0 7.2 2.98
 14 -25 0 10.25 3.55
 15 -25 0 2.72 2.4
 -15 -25 0 -0.19 2.86
 16 -25 0 0.87 1.87
 17 -25 0 0.95 1.56
 18 -25 0 2.89 2.24
 19 -25 0 2.7 2.07
 20 -25 0 -4.63 2.85
 21 -25 0 3.12 2.54
 22 -25 0 -2.46 2.03
 23 -25 0 9.72 2.97
 24 -25 0 -3.67 2.24
 25 -25 0 8.88 2.99
 -26 -25 0 5.45 3.29
 26 -25 0 0.48 1.38
 27 -25 0 7.01 2.71
 -27 -25 0 5.51 2.97
 -28 -25 0 2.32 2.22
 28 -25 0 2.3 1.67
 29 -25 0 6.13 2.27
 -29 -25 0 0.8 1.64
 30 -25 0 2.27 1.7
 0 -26 0 27.42 5.29
 1 -26 0 -12.24 4.01
 -1 -26 0 -3 3.21
 2 -26 0 7.98 4.08
 -2 -26 0 5.1 2.51
 3 -26 0 6.2 3.12
 -3 -26 0 6.6 2.98
 4 -26 0 25.12 5.64
 -4 -26 0 28.69 5.76
 5 -26 0 0.5 4.12
 -5 -26 0 0.61 4.16
 6 -26 0 184.16 14.91
 -6 -26 0 174.61 13.67
 7 -26 0 -4.57 4.03
 -7 -26 0 2.17 5.36
 -8 -26 0 276.63 16.86
 8 -26 0 300.83 18.85
 -9 -26 0 7.05 5.35
 9 -26 0 0.1 2.77
 10 -26 0 178.28 11.77
 -10 -26 0 202.75 14.6
 10 -26 0 181.08 14.89
 -11 -26 0 5.45 4.51
 11 -26 0 5.85 3.44
 -12 -26 0 42.65 7.03
 12 -26 0 34.19 5.61
 -13 -26 0 7.95 3.74
 13 -26 0 3.99 2.78
 14 -26 0 3.07 2.41
 -14 -26 0 8.71 4.26
 15 -26 0 4.59 2.56
 -15 -26 0 2.53 2.4
 -16 -26 0 3.62 2.87
 16 -26 0 5.46 3.67
 -17 -26 0 2.4 2.68
 17 -26 0 0.2 1.68
 -18 -26 0 8.54 3.85
 18 -26 0 5.88 2.71
 19 -26 0 3.48 1.6
 -19 -26 0 -0.56 2.1
 20 -26 0 4.85 2.54
 -20 -26 0 9.29 3.38
 21 -26 0 1.12 1.73
 -21 -26 0 2.13 2.44
 -22 -26 0 42.46 6.23
 22 -26 0 31.08 5.12
 -23 -26 0 7.27 4.17
 23 -26 0 0.15 1.53
 24 -26 0 156.8 10.33
 -24 -26 0 180.35 12.84
 25 -26 0 2.27 1.65
 -25 -26 0 3.81 2.99
 26 -26 0 69.57 6.6
 -26 -26 0 78.18 7.82
 -27 -26 0 -0.04 2.14
 27 -26 0 4.83 1.5
 28 -26 0 36.41 4.58
 0 -27 0 3.16 2.93
 1 -27 0 3.65 3.37
 -1 -27 0 1.5 3.01
 2 -27 0 1.86 2.49
 -2 -27 0 5.57 3.19
 -3 -27 0 -5.05 3.64
 3 -27 0 2.45 2.83
 4 -27 0 -0.14 2.69
 -4 -27 0 -1.84 2.31
 -5 -27 0 -0.56 2.23
 5 -27 0 1.52 2.96
 -6 -27 0 2.21 2.31
 6 -27 0 -1.42 2.73
 -7 -27 0 -3.05 2.78
 7 -27 0 9.18 4.79
 8 -27 0 -8.32 4.06
 -8 -27 0 3.26 3.12
 -9 -27 0 7.82 3.92
 9 -27 0 6.86 3.6
 -10 -27 0 6.65 3.15
 -11 -27 0 -2.69 2.41
 -12 -27 0 -0.26 2.28
 -13 -27 0 -1.57 1.91
 14 -27 0 0.64 1.62
 -14 -27 0 0.16 2.55
 -15 -27 0 0.89 2.08
 15 -27 0 2.78 2.11
 -16 -27 0 -4.53 2.6
 16 -27 0 -4.09 2.68
 -17 -27 0 -0.38 1.98
 17 -27 0 0.76 1.41
 18 -27 0 -2.85 2.33
 -18 -27 0 -1.03 1.88
 -19 -27 0 -2.75 2.49
 19 -27 0 -0.28 1.7
 -20 -27 0 -2.52 2.42
 20 -27 0 -4.06 2.04
 21 -27 0 8 2.62
 -21 -27 0 3.42 3.05
 -22 -27 0 -0.8 2.26
 22 -27 0 -2.01 1.9
 23 -27 0 6.53 2.38
 -23 -27 0 4.83 2.45
 24 -27 0 3.43 1.97
 -24 -27 0 3.36 2.7
 25 -27 0 3.8 2.24
 -25 -27 0 5.97 2.94
 -26 -27 0 3.76 2.18
 26 -27 0 -1.47 1.11
 27 -27 0 2.7 1.53
 0 -28 0 101.81 10.54
 1 -28 0 2.85 4.34
 -1 -28 0 -4.89 2.2
 2 -28 0 37.98 6.72
 -2 -28 0 40.15 6.68
 -3 -28 0 4.1 3.69
 3 -28 0 -1.04 2.59
 -4 -28 0 -1.85 2.7
 4 -28 0 1.16 2.63
 -5 -28 0 -0.63 2.49
 5 -28 0 -1.68 2.94
 6 -28 0 9.87 3.91
 -6 -28 0 14.79 4.82
 7 -28 0 -4.95 3.82
 -7 -28 0 3.54 2.88
 -8 -28 0 48.58 7.61
 -9 -28 0 -3.68 2.36
 -10 -28 0 36.14 6.24
 -11 -28 0 5.42 3.82
 -12 -28 0 -1.58 1.81
 -13 -28 0 -1.99 1.81
 -14 -28 0 6.67 3.75
 -15 -28 0 0.39 2.2
 -16 -28 0 42.43 6.61
 -17 -28 0 -1.19 2.46
 -18 -28 0 44.53 6.64
 -19 -28 0 3.73 2.78
 -20 -28 0 11.33 3.79
 -21 -28 0 4.04 1.83
 -22 -28 0 15.6 3.83
 -23 -28 0 0.44 1.93
 -24 -28 0 12.82 3.35
 0 -29 0 -3.42 3.09
 1 -29 0 3.72 3.23
 -1 -29 0 3.52 3.48
 -2 -29 0 0.79 2.88
 2 -29 0 -2.5 2.97
 3 -29 0 0.94 1.99
 -3 -29 0 1.87 2.86
 4 -29 0 -0.81 2.32
 -4 -29 0 0.52 2.49
 -5 -29 0 0.45 2.91
 5 -29 0 -0.28 2.29
 -6 -29 0 -0.79 2.87
 6 -29 0 -0.03 2.26
 -7 -29 0 0.41 1.97
 -8 -29 0 2.07 2.36
 -9 -29 0 3.23 2.65
 -10 -29 0 -4.97 3.22
 -11 -29 0 2.14 2.59
 -12 -29 0 -0.48 2.31
 -13 -29 0 -2.24 2.12
 -14 -29 0 0.11 1.79
 -15 -29 0 2.16 2.25
 -16 -29 0 -2.37 2.13
 -17 -29 0 7.17 3.21
 -18 -29 0 0.22 2
 -19 -29 0 3.79 2.43
 -20 -29 0 0.62 1.79
 -21 -29 0 0.34 2
 -22 -29 0 1.85 1.57
 0 -30 0 64.03 8.29
 -1 -30 0 2.23 3.96
 1 -30 0 -2.86 3.34
 2 -30 0 40.6 6.28
 -2 -30 0 47.73 7.11
 3 -30 0 0.73 2.05
 -3 -30 0 -4.88 3.11
 4 -30 0 9.87 3.2
 -4 -30 0 15.41 4.05
 -5 -30 0 0.6 2.85
 -6 -30 0 13.22 5.5
 -7 -30 0 5.56 3.5
 -8 -30 0 18.36 4.81
 -9 -30 0 1.91 3.26
 -10 -30 0 8.89 4.05
 -11 -30 0 5.58 3.33
 -12 -30 0 4.41 2.87
 -13 -30 0 0.02 1.87
 -14 -30 0 21.79 4.58
 -15 -30 0 -0.09 1.86
 -16 -30 0 76.4 8.5
 -17 -30 0 -1.29 2.02
 -18 -30 0 83.42 8.36
 -19 -30 0 2.13 2.32
 0 -31 0 -2.8 2.44
 1 -31 0 8.85 3.54
 -1 -31 0 0.86 2.11
 2 -31 0 -0.2 1.98
 -2 -31 0 -0.97 2.74
 -3 -31 0 5.65 3.39
 -4 -31 0 -3.43 2.59
 -5 -31 0 4.38 2.46
 -6 -31 0 -4.81 2.88
 -7 -31 0 -1.44 2.26
 -8 -31 0 -1.09 1.75
 -9 -31 0 1.83 1.74
 -10 -31 0 -3.12 2.28
 -11 -31 0 2.38 1.82
 -12 -31 0 -0.45 1.73
 -13 -31 0 -1.28 1.9
 -14 -31 0 1.38 2.05
 -15 -31 0 2.11 2.48
 -16 -31 0 0.72 2.14
 0 -32 0 16.5 4.08
 -1 -32 0 -0.68 2.04
 -2 -32 0 20.11 4.35
 -3 -32 0 3.4 3.36
 -4 -32 0 9.39 3.63
 -5 -32 0 3.72 2.85
 -6 -32 0 4.55 2.61
 -7 -32 0 -5.19 2.31
 -8 -32 0 11.19 3.69
 -9 -32 0 0.27 2.03
 -10 -32 0 16.23 4.41
 -11 -32 0 2.75 2.16
 -12 -32 0 -0.56 1.75
 -13 -32 0 4.38 2.38
 -3 -33 0 4.96 2.9
 -4 -33 0 1.01 2.83
 -5 -33 0 5.37 2.98
 -6 -33 0 7.06 2.82
 -7 -33 0 5.2 2.92
 -8 -33 0 0.31 2.02
 -2 0 -1 2.1 0.48
 2 0 -1 1.39 0.55
 3 0 -1 -0.55 0.35
 4 0 -1 0.21 0.4
 5 0 -1 0.96 0.62
 6 0 -1 1.8 0.86
 7 0 -1 -0.64 0.59
 8 0 -1 2.97 1.71
 9 0 -1 0.71 0.97
 10 0 -1 1.79 1.64
 10 0 1 0.79 1.13
 11 0 1 -0.3 0.67
 11 0 -1 1.24 1.25
 12 0 -1 67.22 6.02
 12 0 1 43.1 5.21
 13 0 1 0.14 0.73
 13 0 -1 -0.26 1.33
 14 0 1 68.41 6.39
 14 0 -1 35.22 7.17
 15 0 -1 -0.34 1.02
 15 0 1 0.2 0.69
 16 0 1 7.9 2.38
 16 0 -1 3.91 2.69
 17 0 1 0.64 0.92
 17 0 -1 0.06 0.97
 17 0 1 0.5 1
 18 0 -1 4.03 2.13
 18 0 1 2.62 2.01
 18 0 1 3.64 1.63
 19 0 1 -0.15 1.17
 19 0 -1 0.58 1.29
 19 0 1 0.14 0.78
 20 0 1 7.3 3.13
 20 0 -1 10.18 3.47
 21 0 -1 1.03 1.58
 21 0 1 1.23 1.24
 22 0 -1 4.08 2.67
 22 0 1 2.96 2.15
 23 0 -1 -0.67 1.24
 23 0 1 -0.79 0.94
 24 0 -1 8.02 3.5
 24 0 1 5.45 3.28
 25 0 1 0.77 1.65
 25 0 -1 -0.74 1.6
 26 0 -1 3.29 1.87
 26 0 1 3.1 2.45
 27 0 -1 2.8 1.88
 27 0 1 -0.12 1.13
 28 0 -1 7.01 3.2
 28 0 1 3.28 2.18
 29 0 -1 -2.82 2.26
 30 0 -1 24.38 6.25
 31 0 -1 0.59 1.46
 32 0 -1 24.78 6.94
 33 0 1 0.9 3.15
 33 0 -1 -3.01 2.69
 34 0 1 109.24 12.67
 34 0 -1 92.24 12.15
 35 0 1 -0.59 2.53
 35 0 -1 -3.46 3.25
 36 0 -1 49.81 9.29
 36 0 1 64.08 9.37
 37 0 -1 -2.46 2.43
 37 0 1 -2.93 2.78
 38 0 1 36.84 7.6
 38 0 -1 20.86 6.2
 39 0 1 2.04 2.48
 39 0 -1 3.02 1.83
 40 0 1 4.51 2.49
 40 0 -1 2.13 1.95
 41 0 1 2.1 2.65
 41 0 -1 -0.39 1.9
 42 0 1 -2.65 2.12
 42 0 -1 3.04 2.75
 43 0 1 -0.12 2.23
 43 0 -1 0.41 1.56
 44 0 1 4 2.73
 44 0 -1 2.6 2.02
 45 0 -1 -0.94 1.75
 45 0 1 0.12 1.81
 46 0 1 10.15 3.38
 46 0 -1 6 2.51
 47 0 1 0.91 2.11
 -1 -1 -1 8587.7 21.24
 2 -1 -1 0.17 0.22
 -2 -1 -1 0.29 0.22
 3 -1 -1 4650.03 20.51
 4 -1 -1 0.35 0.3
 5 -1 -1 350.92 6.98
 6 -1 -1 -0.17 0.45
 7 -1 -1 83.98 3.82
 8 -1 -1 1.06 0.61
 9 -1 -1 15.45 1.92
 10 1 1 11.66 1.67
 10 -1 -1 13.33 2.13
 10 -1 1 11.46 1.36
 11 -1 -1 1489.16 19.93
 11 -1 1 1496.1 14.66
 11 1 1 1484.05 17.56
 12 1 1 7.09 1.43
 12 -1 -1 8.46 1.76
 12 -1 1 7.38 1.14
 12 -1 1 7.13 1.53
 13 -1 -1 2533.38 27.8
 13 1 1 2595.51 24.76
 13 -1 1 2542.37 21
 14 1 1 6.26 1.44
 14 -1 1 4.62 0.89
 14 -1 1 5.96 1.49
 14 -1 -1 7.25 2.06
 15 -1 -1 1978.05 26.51
 15 -1 1 2003.64 20.31
 15 1 1 1988.62 23.37
 15 -1 1 1968.39 24.54
 16 -1 -1 6.91 2.24
 16 1 1 6.16 1.61
 16 1 -1 5.52 1.7
 16 -1 1 6.05 1.32
 16 -1 1 5.46 1.59
 17 1 -1 834.95 19.34
 17 -1 -1 815.7 18.28
 17 1 1 814.44 16.28
 17 -1 1 797.01 13.59
 17 -1 1 816.04 16.85
 18 -1 -1 18.44 3.07
 18 1 -1 20.23 3.35
 18 -1 1 18.27 2.96
 18 1 1 18.56 2.83
 19 1 1 1064.92 19.49
 19 -1 -1 1114.78 22.78
 19 1 -1 1115.94 23.65
 19 -1 1 1132.55 21.21
 20 -1 1 56.39 5.24
 20 1 1 54.19 4.95
 20 -1 -1 58.47 5.76
 20 1 1 50.63 5.47
 20 1 -1 59.65 5.82
 21 1 1 1153.36 24.84
 21 1 1 1189.25 22.02
 21 -1 1 1303.32 24.48
 21 1 -1 1261.77 26.06
 21 -1 -1 1213.57 25.29
 22 1 -1 27.61 4.19
 22 -1 1 29.27 4.02
 22 -1 -1 28.2 4.17
 22 1 1 27.82 4.25
 23 1 -1 384.56 15.6
 23 -1 -1 372.58 14.57
 23 1 1 355.02 14.49
 23 -1 1 410.33 14.61
 24 -1 -1 17.13 3.79
 24 1 -1 17.66 3.91
 24 -1 1 17.75 3.41
 24 1 1 16.8 3.56
 25 -1 -1 226.2 11.96
 25 1 -1 248.13 13.56
 25 1 1 227.49 12.21
 25 -1 1 236.89 11.73
 26 -1 1 17.67 3.72
 26 1 1 20.94 4.5
 26 -1 -1 19.03 3.98
 26 1 -1 19.67 4.39
 27 1 1 29.17 4.84
 27 -1 -1 29.11 4.51
 27 1 -1 29.87 4.82
 27 -1 1 27.77 4.34
 28 -1 -1 14.56 3.9
 28 1 1 14.09 3.79
 28 1 -1 14.86 3.82
 29 1 -1 311.08 16.42
 29 -1 -1 301.19 15.58
 29 1 1 291.81 15.33
 30 1 -1 15.24 4.18
 30 -1 -1 12.62 3.72
 31 1 -1 973.39 30.68
 31 -1 1 982.79 30.21
 31 -1 -1 929.55 29.2
 31 -1 -1 969.65 29.6
 32 1 -1 13.1 3.87
 32 -1 1 14.93 4.32
 32 -1 -1 9.56 3.31
 32 -1 -1 13.31 4.14
 33 -1 1 1602.39 39.1
 33 -1 -1 1512.62 38.08
 34 -1 -1 1.94 2.32
 34 -1 1 4.57 1.91
 35 1 1 1525.9 39.02
 35 1 -1 1515.37 38.74
 35 -1 -1 1538.28 39
 35 -1 1 1598.3 40.22
 36 1 1 17.29 4.7
 36 -1 -1 18.61 4.39
 36 1 -1 12.66 3.82
 36 -1 1 15.98 4.33
 37 1 1 1073.59 32.82
 37 -1 1 1111.66 33.41
 37 1 -1 1104.5 33.04
 37 -1 -1 1085.51 32.64
 38 -1 1 56.12 8.15
 38 1 -1 54.64 7.42
 38 -1 -1 54.35 7.7
 38 1 1 67.04 8.54
 39 1 1 193.41 14.08
 39 -1 -1 206.6 14.19
 39 1 -1 202.7 14.14
 39 -1 1 210.38 14.46
 40 -1 1 30.51 6.13
 40 1 1 21.47 4.96
 40 1 -1 29.72 5.82
 40 -1 -1 24.14 5.01
 41 1 1 4.07 2.04
 41 1 -1 6.56 2.96
 41 -1 -1 4.02 3.05
 41 -1 1 8.04 3.65
 42 1 -1 12.31 3.47
 42 1 1 16.1 4.63
 42 -1 1 8.79 3.6
 42 -1 -1 11.3 3.73
 43 1 1 20.51 4.77
 43 1 -1 22.08 4.74
 43 -1 -1 22.01 4.6
 43 -1 1 24.55 4.97
 44 -1 -1 8 2.34
 44 -1 1 8.62 2.9
 44 1 -1 9.68 3.41
 44 1 1 11.74 3.76
 45 1 -1 109.51 9.02
 45 1 1 112.33 9.26
 45 -1 -1 109.39 9.01
 45 -1 1 106.71 9.21
 46 -1 -1 15.43 3.53
 46 1 -1 18.78 3.96
 46 1 1 16.69 4.06
 46 -1 1 17.32 3.88
 47 -1 1 234.69 11.82
 47 1 1 235.21 12.04
 0 -2 -1 0.34 0.28
 1 -2 -1 -0.15 0.43
 -1 -2 -1 -0.11 0.21
 -2 -2 -1 0.7 0.35
 2 -2 -1 1.63 0.48
 3 -2 -1 -0.11 0.29
 3 2 -1 0.86 0.34
 4 -2 -1 7.17 1.02
 4 -2 1 7.94 0.65
 5 -2 -1 0.42 0.53
 5 2 -1 0.88 0.8
 5 -2 1 0.47 0.28
 6 -2 1 0.6 0.56
 6 -2 -1 0.65 0.56
 7 -2 -1 -0.31 0.51
 7 2 -1 -0.84 0.77
 7 -2 1 0.16 0.51
 8 -2 1 1.46 0.89
 8 -2 -1 -0.26 0.61
 9 -2 1 1.11 0.53
 9 -2 -1 0.2 0.69
 9 2 -1 1.63 1.01
 9 -2 1 1.51 0.75
 10 2 1 2.06 1.13
 10 -2 1 10.9 1.61
 10 -2 1 7.84 1.93
 10 -2 -1 0.8 0.88
 11 -2 1 0.2 0.74
 11 -2 1 0.37 0.49
 11 -2 -1 -0.99 0.89
 11 2 -1 0.13 0.76
 11 2 1 0.9 0.85
 12 -2 1 20.21 2.25
 12 -2 1 13.9 2.85
 13 -2 1 4.58 1.19
 13 -2 1 4.87 1.49
 13 2 1 4.81 1.82
 13 -2 -1 3.74 1.75
 14 -2 1 28.6 4.36
 14 -2 1 43.11 3.21
 15 2 1 0.4 0.84
 15 -2 1 -0.02 0.72
 15 -2 -1 -0.04 0.98
 16 2 1 1.45 1.13
 16 -2 -1 2.59 1.76
 17 2 1 -1.16 1.23
 17 -2 1 1.21 0.93
 17 -2 -1 1.6 1.45
 18 -2 -1 2.67 2
 18 2 1 2.99 1.63
 18 -2 1 6.89 2.08
 19 -2 1 6.39 2.21
 19 2 -1 5.81 2.31
 19 2 1 5.39 2.34
 19 -2 -1 6.53 2.14
 20 2 1 7.33 2.35
 20 -2 1 6.56 2.12
 20 -2 -1 12.3 2.64
 20 2 -1 12.75 3.19
 21 2 1 -0.35 1.3
 21 -2 -1 0.73 1.46
 21 2 -1 1.27 1.42
 21 -2 1 1.55 1.51
 22 2 1 6.4 2.23
 22 2 -1 7.12 2.6
 22 -2 -1 6.3 2.26
 22 -2 1 6.61 2.13
 23 -2 1 -0.46 0.95
 23 2 -1 -0.28 1.3
 23 -2 -1 -1.71 1.26
 24 -2 1 5.41 2.71
 24 -2 -1 4.1 1.97
 24 2 -1 1.6 1.81
 24 2 1 3.2 1.81
 25 2 1 2.12 2.1
 25 -2 -1 2.93 1.82
 25 2 -1 2.5 1.69
 25 -2 1 1 1.21
 26 -2 1 -1.66 1.29
 26 2 -1 -3.48 2.37
 26 -2 -1 0.17 1.12
 26 2 1 -1.11 1.63
 27 2 -1 -1.03 1.99
 27 2 1 -0.39 1.36
 27 -2 -1 1.48 1.79
 28 2 1 1.57 2.47
 28 -2 -1 -1.59 1.23
 28 2 -1 1.51 2.16
 29 2 -1 2.67 2.73
 29 -2 1 -2.2 2.8
 29 2 1 -0.53 1.86
 29 -2 -1 -1.41 1.68
 29 -2 -1 -0.25 1.3
 30 2 1 1.4 1.82
 30 2 -1 16.23 4.61
 30 -2 -1 2.77 2.1
 30 -2 -1 2.35 3.27
 30 -2 1 14.57 4.69
 31 -2 -1 -1.46 2.88
 31 -2 -1 1.8 1.76
 31 2 -1 -1.05 2.76
 31 -2 1 -0.22 2.07
 32 -2 1 65.42 9.34
 32 2 -1 41.38 7.88
 33 -2 -1 1.11 2.06
 33 2 -1 -2.32 2.73
 33 -2 1 -3.24 3.03
 34 -2 -1 26.82 7.78
 34 2 -1 36.74 7.63
 35 -2 1 -0.82 2.16
 35 -2 -1 0.19 1.77
 36 -2 1 33.69 7.58
 36 2 -1 53.76 7.88
 37 2 1 -0.35 2.33
 37 -2 -1 1.62 2.1
 37 -2 1 4.15 2.08
 37 2 -1 1.36 3.11
 38 2 -1 1.82 2.33
 38 -2 -1 2.22 2.41
 38 2 1 2.35 2.89
 38 -2 1 2.15 2.42
 39 -2 -1 2.75 2.44
 39 2 1 -0.64 2.08
 39 2 -1 -0.57 2.6
 39 -2 1 0.99 1.97
 40 -2 1 0.91 1.97
 40 -2 -1 -2.21 1.79
 40 2 1 0.49 1.87
 40 2 -1 4.48 3.01
 41 2 1 0.08 2.34
 41 -2 1 3.69 2.91
 41 -2 -1 1.52 2.05
 41 2 -1 3 2.29
 42 -2 -1 1.61 2.06
 42 -2 1 1.05 2.17
 42 2 1 -1.16 1.73
 42 2 -1 -1.75 2.46
 43 -2 -1 -1.28 1.51
 43 -2 1 3.16 2.72
 43 2 -1 1.04 1.86
 43 2 1 1.62 2.13
 44 2 -1 -1.46 1.57
 44 -2 -1 3.42 2.51
 44 2 1 1.37 2.05
 44 -2 1 1.78 2.49
 45 -2 -1 -0.68 1.28
 45 2 -1 3.59 2.3
 45 -2 1 0.51 1.68
 45 2 1 3.36 2.12
 46 2 1 4.58 2.78
 46 -2 1 3.93 1.86
 46 -2 -1 0.18 1.23
 46 2 -1 4.03 2.32
 47 -2 1 -0.66 1.45
 47 2 1 1.07 2.18
 0 -3 -1 -0.27 0.32
 1 -3 -1 2436.48 15.75
 -1 -3 -1 2441.14 15.66
 2 -3 -1 0.71 0.44
 -2 -3 -1 1.15 0.5
 2 -3 1 0.96 0.32
 2 3 -1 1.11 0.6
 3 -3 1 205.09 3.18
 3 -3 -1 196.85 4.73
 3 3 -1 203.65 5.59
 4 3 -1 0.69 0.53
 4 -3 1 0.84 0.36
 4 -3 -1 0.61 0.59
 5 3 -1 684.67 11.5
 5 -3 1 696.65 6.47
 6 -3 -1 1.15 0.66
 6 3 -1 2.56 1.16
 6 -3 1 0.99 0.46
 7 -3 1 1327.76 11.05
 7 -3 -1 1339.71 14.83
 8 -3 -1 2.19 0.98
 8 3 -1 1.74 1.16
 8 -3 1 0.74 0.55
 9 3 -1 21.96 2.42
 9 -3 -1 22.81 2.18
 9 -3 1 20.84 1.67
 10 3 -1 37.9 3.58
 10 3 1 34.45 3.34
 10 -3 -1 32.23 2.9
 10 -3 1 30.93 2.45
 11 3 -1 0.9 0.93
 11 -3 1 0.37 0.55
 11 -3 -1 0.53 0.83
 11 3 1 1.98 1.15
 12 -3 -1 25.27 2.84
 12 -3 1 17.05 2.34
 12 3 -1 21.43 3.03
 12 3 1 21.77 2.85
 13 -3 1 323.72 8.34
 13 3 1 316.45 9.87
 13 3 -1 320.93 10.39
 13 -3 -1 342.21 9.74
 14 -3 -1 60.29 4.62
 14 -3 1 53.82 3.89
 14 3 1 55.11 4.65
 14 3 -1 52.78 4.68
 15 -3 -1 166.43 7.41
 15 -3 1 161.28 6.49
 15 3 1 159.78 7.45
 16 -3 -1 2.35 1.23
 16 3 1 3.03 1.74
 16 -3 1 1.34 0.91
 17 -3 -1 372.51 11.72
 17 -3 1 364.66 10.43
 17 3 1 360.06 11.79
 18 -3 -1 5.01 1.63
 18 -3 1 2.67 1.22
 18 3 1 4.36 1.47
 19 -3 -1 9.58 2.28
 19 -3 1 9.36 1.97
 19 3 1 12.56 2.67
 20 3 1 39.59 4.71
 20 -3 1 41.45 4.24
 20 -3 -1 47.15 4.8
 21 3 1 8.19 2.21
 21 -3 1 4.37 1.6
 21 3 -1 10.44 2.59
 21 -3 -1 7.23 1.89
 22 -3 -1 5.32 2.06
 22 3 1 4.49 1.91
 22 3 -1 5.41 2.71
 22 -3 1 3.23 1.79
 23 -3 1 0.19 1.28
 23 3 1 1.76 1.26
 23 -3 -1 0.36 1.05
 23 3 -1 0.52 1.44
 24 -3 1 10.68 2.31
 24 -3 -1 8.79 2.47
 24 3 1 7.8 2.89
 24 3 -1 11.94 3.5
 25 -3 -1 64.32 6.83
 25 3 1 68.34 7.34
 25 -3 1 65.22 5.79
 25 -3 -1 66.3 6.41
 25 3 -1 73.74 7.72
 26 3 1 8.92 3.46
 26 -3 1 11.69 3.44
 26 -3 -1 10.54 2.82
 26 -3 -1 9.71 3.12
 26 3 -1 11.1 3.53
 27 3 1 46.78 6.35
 27 -3 -1 46.98 5.69
 27 3 -1 50.92 6.73
 27 -3 1 48.3 6.43
 27 -3 -1 49.24 6.31
 28 3 1 0.69 2.17
 28 -3 -1 2.47 2.77
 28 -3 -1 0.67 1.21
 28 -3 1 1.94 3.25
 28 3 -1 2.9 3.07
 29 3 1 5.02 3.53
 29 3 -1 1.22 1.65
 29 -3 1 2.25 2.43
 29 -3 -1 4.53 2.52
 29 -3 -1 2.69 2.57
 30 -3 1 24.15 5.56
 30 -3 -1 23.52 5.29
 30 3 -1 28.68 6.1
 30 -3 -1 23.95 4.75
 30 3 1 21.49 5.12
 31 -3 -1 402.84 18.82
 31 -3 1 412.85 19.58
 31 3 -1 436.38 21.71
 32 -3 -1 9.33 4.11
 32 3 -1 2.7 1.71
 32 -3 1 8.85 3.25
 33 -3 -1 731.99 26.11
 33 -3 1 755.63 27.09
 34 -3 -1 7.79 3.48
 34 3 -1 6.79 2.54
 34 -3 1 8.27 3.4
 35 -3 -1 803.82 27.58
 35 -3 1 840.59 29.01
 36 -3 -1 31.67 6.01
 36 -3 1 37.98 7.17
 37 -3 1 89.98 9.97
 37 -3 -1 83.81 9.08
 38 -3 1 0.32 1.95
 38 3 -1 2.3 1.92
 38 3 1 0.75 2.72
 38 -3 -1 2.02 2.06
 39 3 1 2.63 2.38
 39 -3 -1 0.65 2.46
 39 -3 1 3.27 2.95
 39 3 -1 -1.16 2.74
 40 -3 1 4.03 2.68
 40 -3 -1 4.31 3.05
 40 3 1 5.4 2.89
 40 3 -1 6.62 3.02
 41 -3 -1 65.43 7.81
 41 3 1 61.77 7.78
 41 -3 1 68.12 8.43
 41 3 -1 65.17 7.68
 42 3 1 2.56 2.14
 42 -3 1 4.28 1.94
 42 3 -1 3.22 2.87
 42 -3 -1 6.62 2.94
 43 3 1 21.92 4.97
 43 -3 -1 17.31 4.07
 43 3 -1 23.15 5.39
 43 -3 1 18.5 4.66
 44 3 1 12.95 4.26
 44 3 -1 15.99 4.61
 44 -3 -1 14.36 3.6
 44 -3 1 10.85 3.25
 45 3 1 9.59 2.87
 45 -3 1 7.47 2.81
 45 3 -1 8.65 2.58
 45 -3 -1 7.91 2.61
 46 -3 1 0.36 1.75
 46 3 1 -0.52 1.4
 46 -3 -1 1.81 1.6
 46 3 -1 4.62 2.62
 47 -3 1 78.17 6.92
 47 3 1 80.7 7.36
 0 -4 -1 11.03 1.64
 0 4 -1 10.18 1.55
 -1 -4 -1 0.39 0.51
 1 4 -1 0.83 0.71
 -1 4 -1 0.66 0.55
 1 -4 -1 0.71 0.59
 2 4 -1 1.36 0.9
 -2 -4 -1 1.07 0.6
 2 -4 -1 0.94 0.54
 2 -4 1 1.1 0.5
 3 4 -1 0.52 0.8
 3 -4 1 0.5 0.37
 3 -4 -1 0.93 0.7
 4 4 -1 6.38 1.48
 4 -4 1 3.9 0.85
 4 -4 -1 5.13 1.35
 5 -4 1 0.16 0.28
 5 -4 -1 0.09 0.55
 5 4 -1 -0.17 0.91
 6 -4 -1 1.73 0.83
 6 4 -1 1.4 0.64
 6 -4 1 1 0.5
 7 -4 1 0.33 0.44
 7 -4 -1 1.42 0.73
 7 4 -1 0.04 0.92
 8 -4 -1 21.29 2.69
 8 -4 1 18.56 1.9
 8 4 -1 22.19 3.02
 9 4 -1 -0.02 0.87
 9 -4 1 -0.42 0.62
 9 -4 -1 0.74 0.64
 10 -4 -1 22.38 2.67
 10 -4 1 19.18 2.17
 10 4 1 16.88 2.97
 10 4 -1 15.79 3.11
 11 -4 1 2.71 1.02
 11 4 -1 1.77 1.3
 11 4 1 2.04 1.2
 11 -4 -1 2.37 1.26
 12 -4 -1 4.98 2.03
 12 4 1 5.11 2.05
 12 4 -1 8.73 2.59
 12 -4 1 5.1 1.75
 13 -4 -1 1.33 1.13
 13 -4 1 1.17 0.74
 13 4 1 1.55 1.59
 13 4 -1 2.23 1.24
 14 -4 1 1.05 0.92
 14 -4 -1 -0.22 0.79
 14 4 -1 1.74 1.24
 14 4 1 0.86 1.03
 15 -4 -1 0.51 1.05
 15 -4 1 0.02 0.74
 15 4 1 0.2 1.06
 15 4 -1 0.82 1.19
 16 4 1 0.17 1.01
 16 4 -1 0.81 1.09
 16 -4 1 -0.23 0.76
 16 -4 -1 1.17 1.22
 17 -4 -1 -0.54 0.77
 17 -4 1 0.69 0.94
 17 4 1 0.79 1.33
 18 -4 1 7.85 2.16
 18 -4 -1 11.45 2.88
 18 4 1 11.74 2.88
 19 -4 1 -0.78 0.72
 19 4 1 2.27 1.73
 19 -4 -1 0.77 1.32
 20 -4 -1 3.85 1.71
 20 4 1 2.53 1.58
 20 -4 1 3.51 1.7
 21 -4 -1 -0.99 0.85
 21 4 1 -0.04 1.01
 21 -4 1 1.18 1.1
 22 4 1 2.75 2.11
 22 -4 1 0.92 1.2
 22 -4 1 4.5 2.28
 22 -4 -1 2.02 1.19
 23 -4 -1 0.09 1.09
 23 4 1 2.76 1.9
 23 -4 1 3.75 2.75
 23 -4 1 1.56 1.56
 23 4 -1 2.44 2.02
 23 -4 -1 2.95 2.4
 24 4 1 4.25 2.38
 24 4 -1 6.73 3.25
 24 -4 1 4.77 2.66
 24 -4 -1 6.31 2.46
 24 -4 1 3.4 2.45
 24 -4 -1 10.45 3.47
 25 -4 -1 2.27 2.63
 25 -4 -1 0.2 1.51
 25 -4 1 5.04 3.74
 25 4 -1 -0.36 1.67
 26 -4 -1 3.98 3.08
 26 -4 1 2.68 3.6
 26 4 -1 0.96 1.95
 26 4 1 1.94 2.59
 26 -4 -1 3.46 1.99
 27 -4 1 2.69 2.07
 27 -4 -1 -0.35 2.23
 27 4 1 0.21 1.81
 27 -4 -1 0.47 1.11
 27 4 -1 0.86 1.92
 28 4 -1 2.15 1.97
 28 -4 -1 0.3 2.28
 28 -4 -1 2.22 2.06
 28 4 1 4.31 4.06
 28 -4 1 2.82 2.4
 29 -4 -1 -0.5 1.08
 29 4 1 1.13 1.93
 29 -4 -1 -2.1 2.9
 29 -4 1 1.32 2.41
 29 4 -1 0.77 1.7
 30 4 1 1.78 2.67
 30 -4 1 1.09 1.79
 30 4 -1 1.85 2.06
 30 -4 -1 0.64 2.11
 31 4 -1 -0.78 2.13
 31 4 1 1.23 2.73
 31 -4 -1 -2.16 2.81
 31 -4 1 5.78 3.63
 32 -4 1 3.93 3.2
 32 4 -1 5.22 3.47
 32 -4 -1 4.15 2.5
 33 -4 1 2.32 1.99
 33 4 -1 -3.22 2.84
 33 -4 -1 1.72 2.32
 34 -4 1 7.37 4.79
 34 -4 -1 8.21 4.13
 34 4 -1 -1.61 2.37
 35 -4 -1 2.86 2.18
 35 -4 1 1.84 3.2
 36 -4 -1 2.69 2.78
 36 -4 1 0.23 2.42
 37 -4 1 1.5 1.94
 37 -4 -1 0.01 1.6
 38 -4 -1 3.98 2.9
 38 -4 1 1.59 2.35
 39 4 1 1.33 2.39
 39 -4 1 1.43 2.57
 39 4 -1 -0.61 2.16
 39 -4 -1 2.74 2.68
 40 -4 1 7.29 3.83
 40 -4 -1 7.4 3.32
 40 4 1 4.21 3.12
 40 4 -1 6.96 3.19
 41 4 -1 0.21 1.78
 41 -4 -1 -0.66 1.82
 41 -4 1 1.81 2.64
 41 4 1 5.23 3.33
 42 -4 -1 4.02 2.76
 42 4 -1 3.58 2.73
 42 4 1 6.05 3.37
 42 -4 1 4.28 3
 43 4 -1 2.8 2.8
 43 -4 -1 0.86 1.47
 43 4 1 3.6 3.03
 43 -4 1 2.05 1.96
 44 4 1 0.1 2.39
 44 -4 -1 0.11 1.76
 44 -4 1 1.56 2.23
 44 4 -1 0.33 1.55
 45 -4 1 -0.52 1.34
 45 -4 -1 0.04 1.22
 45 4 -1 -1.03 1.41
 46 -4 -1 2.69 1.67
 46 4 1 -0.05 1.3
 46 4 -1 0.71 1.59
 46 -4 1 -1.39 1.46
 47 -4 1 1.63 1.15
 47 4 1 2.28 1.6
 0 -5 -1 -0.04 0.43
 0 5 -1 -0.37 0.74
 1 -5 -1 85.96 3.53
 -1 -5 -1 85.58 3.63
 1 5 -1 84.37 4.03
 -1 5 -1 80.38 3.59
 2 -5 1 9.16 1.13
 -2 5 -1 10.37 1.45
 2 -5 -1 8.47 1.45
 2 5 -1 9.47 1.63
 -2 -5 -1 10.59 1.43
 3 -5 1 329.5 5.96
 3 -5 -1 329.13 7.11
 3 5 -1 310.98 8.26
 4 -5 -1 3.9 1.19
 4 5 -1 4.81 1.44
 4 -5 1 3.85 0.84
 5 -5 -1 1320.61 14.81
 5 5 -1 1354.67 18.2
 6 -5 -1 0.45 0.71
 6 -5 1 0.77 0.57
 6 5 -1 1.54 1.16
 7 5 -1 110.55 5.57
 7 -5 -1 110.8 4.5
 7 -5 1 114.15 3.65
 8 5 -1 19.99 2.75
 8 -5 -1 20.08 2.15
 8 -5 1 19.25 1.76
 9 -5 -1 2686.06 23.8
 9 -5 1 2701.55 19.23
 10 -5 -1 1.81 0.97
 10 5 1 3.78 1.48
 10 5 -1 2.46 1.38
 10 -5 1 1.16 0.69
 11 5 -1 533.65 13.73
 11 -5 1 521.72 9.25
 11 5 1 536.56 12.92
 11 -5 -1 517.44 11.24
 12 5 1 3.16 1.27
 12 -5 -1 2.99 1.32
 12 5 -1 1.1 0.93
 12 -5 1 2.11 0.72
 13 -5 1 670.45 11.69
 13 -5 -1 697.22 14.16
 13 5 1 705.6 15.76
 13 5 -1 665.08 16.03
 14 -5 1 22.14 2.51
 14 5 1 26.32 3.53
 14 5 -1 25.17 3.63
 14 -5 -1 24.78 3.09
 15 -5 1 135.03 5.73
 15 -5 -1 139.21 6.76
 15 5 -1 130.89 7.4
 15 5 1 139.84 7.42
 16 -5 -1 11.1 2.14
 16 5 1 7.14 2.2
 16 5 -1 8.75 2.23
 16 -5 1 8.48 1.74
 17 5 1 62.96 5.28
 17 5 -1 63.27 5.5
 17 -5 1 63.43 4.21
 17 -5 -1 67.5 4.88
 18 -5 1 3.52 1.33
 18 -5 -1 3.02 1.36
 18 5 1 0.17 0.97
 19 -5 -1 2.61 0.92
 19 -5 1 2.46 1.17
 19 5 1 3.3 1.38
 20 -5 -1 36.45 4.23
 20 -5 1 34.63 3.76
 20 5 1 35.48 4.84
 21 -5 1 335.71 14.66
 21 -5 -1 344.4 12.73
 21 5 1 353.13 13.94
 21 -5 1 342.91 11.37
 22 -5 1 7.43 2.22
 22 -5 -1 5.63 1.92
 22 -5 1 5.15 1.67
 22 5 1 5.64 1.93
 22 -5 -1 3.48 1.82
 23 -5 -1 1040.68 23.42
 23 -5 -1 990 26.01
 23 5 1 1005.9 25.42
 23 -5 1 1009.85 26.7
 23 -5 1 983.01 20.52
 24 -5 -1 0.58 1.4
 24 -5 1 1.79 2
 24 -5 -1 3.93 2.93
 24 5 1 1.93 1.86
 25 5 1 773.54 23.14
 25 5 -1 793.05 26.97
 25 -5 -1 734.46 21.13
 25 -5 1 732.73 23.42
 25 -5 -1 727.34 23.23
 26 -5 1 13.12 3.43
 26 -5 -1 12.86 3.8
 26 5 -1 13.47 4.19
 26 -5 -1 14.98 3.32
 27 -5 -1 662.06 22.76
 27 -5 1 660.01 22.92
 27 -5 -1 674.91 21.35
 27 5 -1 719.62 26.9
 27 5 1 667.11 25.56
 28 -5 -1 7.3 3.4
 28 5 -1 9.72 3.61
 28 -5 1 5.05 3.19
 28 -5 -1 6.96 2.67
 28 5 1 6.01 3.79
 29 -5 -1 97.45 8.46
 29 5 1 111.73 10.76
 29 -5 1 115.92 9.99
 29 5 -1 117.1 11.48
 29 -5 -1 110.88 9.69
 30 -5 -1 10.1 3.85
 30 5 1 6.37 2.89
 30 5 -1 7.21 3.72
 30 -5 1 5.94 2.98
 31 -5 -1 8.21 2.84
 31 5 -1 9.36 3.68
 31 -5 1 9.95 3.07
 31 5 1 11.76 4.18
 32 5 -1 1.34 1.96
 32 -5 1 0.16 2.05
 32 -5 -1 0.98 2.17
 33 -5 -1 301.99 16.72
 33 5 -1 288.96 19.41
 33 -5 1 304.55 17.26
 34 -5 -1 21.48 5.26
 34 -5 1 20.99 5.51
 34 5 -1 17.19 5.77
 35 -5 1 9.08 3.53
 35 -5 -1 11.71 3.91
 36 -5 -1 4.91 2.61
 36 -5 1 5.76 2.92
 37 -5 1 22.04 5.49
 37 -5 -1 18.29 4.46
 38 -5 1 25.43 5.41
 38 -5 -1 21.16 5.47
 39 -5 -1 263.85 15.81
 39 -5 1 283.88 16.63
 40 5 1 3.72 2.17
 40 5 -1 6.01 2.79
 40 -5 -1 3.41 1.66
 40 -5 1 2.86 2.47
 41 -5 1 336.51 17.19
 41 -5 -1 325.68 16.47
 41 5 -1 324.55 17.8
 41 5 1 327.52 17.55
 42 5 1 2.07 2.25
 42 -5 -1 -0.7 1.82
 42 -5 1 2.05 1.83
 42 5 -1 -0.86 2.49
 43 5 -1 242.5 14.5
 43 -5 1 241.57 13.8
 43 5 1 235.9 14.01
 43 -5 -1 247.57 13.61
 44 -5 -1 8.51 2.39
 44 5 1 5.76 2.62
 44 -5 1 6.59 3.1
 44 5 -1 5.58 3.24
 45 5 -1 55.28 6.57
 45 -5 1 53.15 6.28
 45 5 1 57.11 6.92
 45 -5 -1 48.39 5.63
 46 5 -1 5.48 2.96
 46 -5 1 4.62 1.88
 46 -5 -1 2.58 1.95
 46 5 1 4.94 2.37
 47 5 1 2.22 1.95
 0 -6 -1 34.46 2.98
 0 6 -1 20.74 2.91
 1 6 -1 0.84 0.69
 -1 6 -1 0.36 0.79
 -1 -6 -1 -0.48 0.5
 1 -6 -1 -0.1 0.6
 -2 6 -1 42.59 3.47
 2 6 -1 35.95 4.35
 -2 -6 -1 38.71 3.86
 2 -6 -1 48.18 3.9
 3 -6 1 0.63 0.48
 -3 6 -1 1.16 0.73
 3 -6 -1 0.29 0.69
 4 6 -1 22.25 3
 4 -6 -1 25.07 2.63
 4 -6 1 18.24 2.13
 5 -6 1 1.72 0.74
 5 -6 -1 1.8 1.06
 5 6 -1 2.74 1.24
 6 -6 -1 3.26 1.07
 6 -6 1 0.33 0.57
 6 6 -1 2.53 1.89
 7 -6 1 0.42 0.55
 7 6 -1 1.02 0.89
 7 -6 -1 1.22 0.86
 8 -6 -1 6.82 1.7
 8 -6 1 4.16 1.25
 8 6 -1 5.58 2.3
 9 6 1 0.1 0.97
 9 6 -1 0.54 1.06
 9 -6 1 0.68 0.69
 9 -6 -1 0.35 0.71
 10 -6 1 15 2.23
 10 6 1 21.05 3.42
 10 -6 -1 21.04 2.85
 10 6 -1 18.66 3.48
 11 6 1 0.1 1.02
 11 -6 -1 -0.75 0.83
 11 -6 1 0.25 0.49
 11 6 -1 -1.38 1.42
 12 -6 -1 20.99 3.26
 12 6 1 25.03 3.66
 12 -6 1 19.4 2.45
 12 6 -1 25.22 3.86
 13 6 -1 2.42 1.53
 13 -6 -1 0.23 0.64
 13 -6 1 0.45 0.74
 13 6 1 -0.41 0.97
 14 -6 1 19.86 2.68
 14 6 1 24.34 3.85
 14 6 -1 23.78 3.96
 14 -6 -1 23.68 3.27
 15 -6 1 2.16 0.96
 15 -6 -1 1.61 1.1
 15 6 1 1.35 1.18
 15 6 -1 0.9 1.35
 16 -6 1 9.96 2.02
 16 6 -1 10.06 3.05
 16 6 1 10.09 2.79
 16 -6 -1 11.53 2.57
 17 6 -1 2.22 1.67
 17 -6 1 2.39 1.21
 17 6 1 3.84 2.08
 17 -6 -1 1.31 1.08
 18 -6 1 30.61 3.65
 18 6 -1 28.27 5.04
 18 -6 -1 32.55 4.35
 18 6 1 29.5 4.88
 19 6 1 -0.39 1.35
 19 -6 -1 0.55 0.97
 19 -6 1 0.42 0.66
 20 -6 1 59.8 5.41
 20 -6 -1 66.66 6.33
 20 6 1 65 7.59
 21 6 1 0.38 1.08
 21 -6 -1 -0.79 0.99
 21 -6 1 -0.27 1.41
 21 -6 1 0.27 0.85
 22 -6 -1 38.08 5.44
 22 6 1 42.65 6.33
 22 -6 1 29.57 4.21
 22 -6 -1 34.78 6.28
 22 -6 1 41.35 6.66
 23 6 1 1.76 1.49
 23 -6 1 0.46 2.12
 23 -6 -1 1.14 1.72
 23 -6 -1 0.23 1.32
 24 -6 -1 36.58 6.44
 24 6 1 27.93 5.44
 24 -6 1 30.11 6.13
 24 -6 -1 29.91 4.91
 25 6 1 -1.74 2.45
 25 -6 -1 -0.15 1.22
 25 -6 1 2.2 2.79
 25 -6 -1 1.47 2.59
 26 -6 -1 18.44 4.18
 26 -6 -1 23.91 5.44
 26 -6 1 25.4 6.08
 26 6 -1 23.04 6.37
 27 -6 -1 -0.02 1.34
 27 -6 -1 -0.08 1.55
 27 -6 1 -0.68 1.96
 27 6 -1 0.29 3.22
 28 6 1 8.11 3.77
 28 6 -1 6.61 3.9
 28 -6 1 6.4 3.06
 28 -6 -1 8.28 2.74
 28 -6 -1 7.04 3.59
 29 6 -1 1.26 2.44
 29 6 1 1.83 3.34
 29 -6 1 0.55 1.83
 29 -6 -1 -0.35 1.8
 30 6 1 3.64 2.99
 30 -6 1 7.05 3.2
 30 -6 -1 8.03 3.76
 30 6 -1 4.18 3.28
 31 6 1 -0.3 2.11
 31 -6 -1 -2.25 2.24
 31 -6 1 1.28 2.31
 32 -6 -1 2.52 1.73
 32 6 1 2.88 2.35
 32 6 -1 -1.92 3.9
 32 -6 1 5.4 3.35
 33 -6 1 3.25 3.14
 33 -6 -1 -0.01 2.04
 33 6 -1 1 2.79
 34 6 -1 0.13 2.66
 34 -6 -1 0.64 2.05
 34 -6 1 0.32 2.25
 35 -6 1 1.37 2.37
 35 -6 -1 -2.16 1.58
 36 -6 1 15.61 4.9
 36 -6 -1 15.55 5.06
 37 -6 -1 0.98 1.66
 37 -6 1 3.46 2.77
 38 -6 -1 18.17 4.96
 38 -6 1 20.37 5.62
 39 -6 1 -0.22 1.76
 39 -6 -1 0.8 2.07
 40 -6 1 18.54 4.78
 40 -6 -1 14.31 4.19
 40 6 -1 14.38 4.34
 41 -6 -1 -3.6 2.46
 41 6 -1 -0.8 3.16
 41 6 1 -1.08 1.82
 41 -6 1 -0.48 1.58
 42 6 1 14.03 4.91
 42 -6 -1 16.61 4.29
 42 6 -1 18.05 5.45
 42 -6 1 22.04 4.97
 43 6 1 0.83 1.87
 43 6 -1 0.62 3.55
 43 -6 1 0.08 2.4
 43 -6 -1 0.54 2.26
 44 -6 -1 9.46 2.53
 44 6 -1 12.94 3.85
 44 -6 1 11.09 3.51
 44 6 1 8.88 3.4
 45 6 -1 -0.64 1.7
 45 6 1 1.25 2.35
 45 -6 1 4.51 2.56
 45 -6 -1 -0.35 1.08
 46 6 -1 5.59 2.75
 46 -6 1 2.45 1.14
 46 6 1 4.27 2.11
 47 6 1 -0.25 1.34
 0 -7 -1 0.16 0.66
 0 7 -1 -0.97 0.92
 -1 7 -1 307.27 8.51
 1 7 -1 322.1 9.13
 1 -7 -1 318.73 8.11
 -1 -7 -1 313.29 8.17
 2 -7 -1 1.09 0.79
 -2 -7 -1 0.65 0.73
 -2 7 -1 -0.99 0.83
 2 7 -1 1.37 1.18
 -3 7 -1 1168.45 15.24
 3 -7 -1 1124.04 15.1
 3 -7 1 1141.64 13.82
 4 -7 -1 64.86 4.19
 4 -7 1 70.07 3.69
 4 7 -1 64.83 4.82
 -4 7 -1 73.37 3.91
 5 -7 1 28.8 2.29
 5 -7 -1 31.86 2.72
 6 -7 -1 85.03 4.41
 6 -7 1 81.21 3.92
 6 7 -1 77.2 5.43
 7 7 -1 1525.66 23
 7 -7 -1 1560.36 18.6
 7 -7 1 1599.28 16.21
 8 -7 -1 2.78 0.99
 8 -7 1 1.84 0.77
 8 7 1 1.95 1.2
 8 7 -1 2.79 1.46
 9 7 -1 2650.88 31.5
 9 7 1 2724.68 30.71
 9 -7 -1 2728.73 25.83
 9 -7 1 2674.64 22.13
 10 7 -1 2.05 1.58
 10 -7 1 0.05 0.54
 10 -7 -1 0.77 0.77
 10 7 1 1.31 1.37
 11 -7 1 1282.76 16.05
 11 7 -1 1271.15 22.91
 11 7 1 1321.11 22.28
 11 -7 -1 1308.72 19.01
 12 7 -1 8.34 2.18
 12 -7 1 5.83 1.25
 12 -7 -1 7.5 1.61
 12 7 1 6.02 1.74
 13 -7 1 301.27 8.3
 13 7 -1 291.4 11.43
 13 7 1 302.87 11.29
 13 -7 -1 308.98 9.78
 14 7 1 0.21 1.12
 14 -7 -1 0.08 0.67
 14 -7 1 -0.46 0.78
 14 7 -1 -0.77 1.28
 15 7 -1 100.97 7.08
 15 -7 1 100.78 5.12
 15 7 1 99.63 6.6
 15 -7 -1 102.18 5.95
 16 7 -1 21.64 3.49
 16 -7 1 24.3 2.87
 16 7 1 25.82 3.89
 16 -7 -1 24.37 3.26
 17 -7 1 107.95 5.56
 17 -7 -1 110.18 6.37
 17 7 -1 98.44 7.27
 17 7 1 101.24 7.02
 18 7 -1 22.36 4.1
 18 -7 1 22.19 2.75
 18 7 1 21.05 3.62
 18 -7 -1 23.18 3.29
 19 -7 1 10.91 1.87
 19 -7 -1 9.09 1.9
 19 7 1 9.4 2.73
 19 7 -1 8.05 2.16
 20 -7 1 30.99 4.78
 20 7 1 30.97 4.66
 20 -7 -1 32.51 3.96
 20 -7 1 29.34 3.41
 21 -7 1 744.06 16.78
 21 -7 1 802.81 23.1
 21 -7 -1 787.18 19.47
 21 -7 -1 730.14 21.74
 21 7 1 805.34 22.63
 22 7 1 21.86 4.24
 22 -7 1 19.04 3.92
 22 -7 -1 16.23 3.81
 22 -7 -1 17.81 3.13
 23 -7 1 1600.72 33.82
 23 -7 -1 1570.1 28.99
 23 -7 -1 1543.93 33.16
 23 7 1 1588.65 33.39
 24 -7 1 38.92 6.13
 24 -7 -1 38.2 5.9
 24 7 1 33.43 5.09
 24 -7 -1 39.37 4.88
 25 7 1 2040.27 39.93
 25 -7 1 2052.11 39.68
 25 -7 -1 2050.74 38.87
 25 -7 -1 2060.97 35.08
 26 -7 1 7.2 2.35
 26 -7 -1 4.46 2.64
 26 -7 -1 3.99 1.89
 26 7 1 3.4 1.7
 27 -7 -1 802.96 23.24
 27 -7 -1 804.66 25.16
 27 -7 1 858.97 26.57
 27 7 -1 880.16 31.68
 28 7 -1 19.45 5.32
 28 -7 1 17.41 4.39
 28 -7 -1 15.89 3.46
 29 7 -1 451.95 23.89
 29 -7 1 427.13 19.34
 29 -7 -1 417.5 18.71
 29 7 1 427.33 22.64
 30 7 1 3.12 2.88
 30 -7 -1 4.14 2.92
 30 -7 1 2.57 2.54
 30 7 -1 1.27 3
 31 -7 1 7.25 3.27
 31 -7 -1 9.88 3.49
 31 7 -1 9.2 3.32
 31 7 1 11.83 5.05
 32 7 -1 22.8 6.1
 32 7 1 17.2 4.74
 32 -7 1 21.33 5.28
 32 -7 -1 24.66 5.29
 33 -7 -1 22.22 5.18
 33 7 -1 27.11 7.04
 33 -7 1 25.68 5.44
 34 -7 1 19.45 4.98
 34 -7 -1 18.73 4.74
 35 -7 -1 19.57 4.26
 35 -7 1 20.3 4.67
 36 -7 -1 10.93 4.2
 36 -7 1 12.7 3.45
 37 -7 -1 214.53 13.77
 37 -7 1 208.65 14.2
 38 -7 1 19.96 4.57
 38 -7 -1 20.06 4.63
 39 -7 1 466.83 20.42
 39 -7 -1 446.68 19.41
 40 -7 -1 4.29 1.84
 40 -7 1 3.55 2.34
 41 7 -1 507.14 21.82
 41 7 1 533.43 22.38
 41 -7 1 552.64 21.24
 41 -7 -1 549.49 20.81
 42 -7 -1 11.11 3.08
 42 7 -1 10.32 3.85
 42 7 1 7.21 3.36
 42 -7 1 10.28 2.84
 43 7 -1 462.88 19.48
 43 -7 1 476.41 18.79
 43 7 1 439.38 19.57
 43 -7 -1 459.5 18.28
 44 7 -1 6.55 2.86
 44 -7 -1 5.26 2.52
 44 -7 1 6.78 2.62
 44 7 1 8.92 3.01
 45 7 -1 239.32 12.85
 45 7 1 271.52 14.04
 45 -7 1 271 13.38
 45 -7 -1 222.59 11.51
 46 -7 1 4.87 1.91
 46 7 -1 3.36 1.54
 46 7 1 5.73 2.23
 0 -8 -1 85.69 5.93
 0 8 -1 94.12 6.52
 -1 8 -1 -2.33 1.17
 -1 -8 -1 1.25 0.91
 1 8 -1 0.86 1.16
 1 -8 -1 0.76 0.95
 2 -8 -1 122.22 6.35
 -2 -8 -1 102.56 6.44
 2 8 -1 112.97 7.04
 -2 8 -1 112.44 6.69
 -3 8 -1 0.08 0.74
 3 -8 1 -0.88 0.72
 3 -8 -1 -0.69 0.79
 3 8 -1 0.04 1.08
 -4 8 -1 215.21 8.5
 4 8 -1 198.74 10.71
 4 -8 -1 231.15 8.42
 4 -8 1 208.38 7.46
 5 -8 -1 1.61 0.89
 5 -8 1 0.3 0.61
 5 8 -1 2.12 1.44
 6 -8 -1 183.06 8.21
 6 8 -1 204.97 9.8
 6 -8 1 182.8 7.15
 7 -8 1 0.29 0.61
 7 8 -1 -0.56 1.43
 7 8 1 -2.42 1.36
 7 -8 -1 0.1 0.8
 8 -8 -1 52.7 4.79
 8 8 -1 62.64 5.68
 8 8 1 46.98 5.55
 8 -8 1 48.98 3.89
 9 8 -1 1.85 1.68
 9 -8 -1 4.11 1.43
 9 8 1 2.42 1.38
 9 -8 1 2.52 1.01
 10 -8 1 23.74 2.93
 10 8 1 25.59 4.4
 10 -8 -1 27.27 3.47
 10 8 -1 27.73 4.93
 11 -8 -1 -1.39 1.14
 11 8 1 -1.84 1.51
 11 -8 1 0.14 0.8
 12 8 -1 74.82 6.82
 12 8 1 52.82 6.6
 12 -8 -1 70.24 5.39
 12 -8 1 53.43 4.33
 13 -8 -1 0.84 0.96
 13 8 -1 -1.27 1.53
 13 -8 1 0.46 0.53
 13 8 1 -0.08 1.07
 14 8 1 49.08 5.72
 14 -8 -1 44.43 4.59
 14 -8 1 38.59 3.82
 14 8 -1 53.54 6.11
 15 -8 -1 2.74 1.38
 15 -8 1 1.14 0.72
 15 8 1 1.8 1.55
 15 8 -1 2.24 1.4
 16 8 -1 81 8.3
 16 -8 1 80.72 5.51
 16 8 1 79.34 8.02
 16 -8 -1 93.37 6.84
 17 8 1 3.4 1.79
 17 8 -1 5.68 2.63
 17 -8 -1 3.97 1.79
 17 -8 1 2.73 1.35
 18 -8 1 43.61 4.31
 18 8 1 50.8 6.31
 18 8 -1 49.39 6.69
 18 -8 -1 48.71 5.21
 19 -8 -1 0.46 1
 19 -8 1 -0.97 2.6
 19 -8 1 0.6 0.77
 19 8 -1 2.08 1.76
 19 8 1 -0.36 1.38
 20 -8 1 25.34 3.4
 20 -8 1 32.4 6.01
 20 8 1 23.33 4.95
 20 -8 -1 28.73 4.28
 20 -8 -1 22.88 4.65
 21 -8 1 -0.18 2.04
 21 8 1 1.22 1.61
 21 -8 -1 0.22 0.8
 21 -8 -1 0.47 1.61
 22 8 1 94.92 9.51
 22 -8 -1 74.21 8.95
 22 -8 -1 77.32 7.47
 22 -8 1 96.44 10.1
 23 -8 1 -1.99 2.31
 23 8 1 -2.26 2.01
 23 -8 -1 -0.55 2.36
 23 -8 -1 -1.51 1.54
 24 -8 -1 99.16 10.5
 24 -8 1 122.84 11.55
 24 8 1 99.55 10.11
 24 -8 -1 106.76 8.73
 25 -8 1 3.08 2.23
 25 8 1 -2.92 2.46
 25 -8 -1 0.85 2.17
 25 -8 -1 1.75 1.34
 26 8 1 38.94 6.75
 26 -8 1 51.08 7.94
 26 -8 -1 44.3 6.08
 26 -8 -1 52.05 7.86
 27 -8 1 -0.01 2.05
 27 -8 -1 3.54 1.84
 28 8 -1 16.14 5.62
 28 -8 -1 26.21 5.73
 28 -8 1 23.47 5.42
 29 -8 1 -0.05 2.49
 29 8 -1 -2.82 3.53
 29 -8 -1 0.82 1.97
 30 8 -1 3.15 2.36
 30 -8 1 1.98 2.01
 30 8 1 2.17 3.21
 30 -8 -1 2.02 2.14
 31 8 1 2.53 3.8
 31 -8 -1 3.97 2.98
 31 -8 1 4.06 3.11
 31 8 -1 1.61 3.04
 32 -8 -1 2.12 2.3
 32 8 -1 3.54 3.48
 32 -8 1 1.67 2.47
 32 8 1 0.99 3.32
 33 8 1 0.66 2.8
 33 8 -1 0.93 2.71
 33 -8 1 2.18 3.19
 33 -8 -1 3.08 2.45
 34 -8 -1 25.27 5.74
 34 -8 1 27.06 5.71
 35 -8 -1 1.6 1.58
 35 -8 1 1.35 2.67
 36 -8 1 34.83 6.52
 36 -8 -1 27.64 5.59
 37 -8 1 -0.74 1.89
 37 -8 -1 0.21 1.61
 38 -8 -1 26.48 5.27
 38 -8 1 25.44 5.71
 39 -8 1 1.2 2.23
 39 -8 -1 -5.05 2.68
 40 -8 -1 21.1 4.84
 40 -8 1 25.66 5.47
 41 -8 -1 -3.54 2.17
 41 -8 1 -2.61 2.63
 42 8 1 27.13 6.41
 42 -8 1 33.02 5.98
 42 -8 -1 25.57 4.92
 42 8 -1 21.29 5.38
 43 -8 -1 -0.3 1.19
 43 8 -1 -3.73 2.94
 43 -8 1 2.04 1.53
 43 8 1 -1.19 1.99
 44 -8 1 26.79 4.96
 44 -8 -1 21.38 4.09
 44 8 -1 25.55 5.6
 44 8 1 25.07 5.67
 45 8 1 1.84 2.43
 45 -8 1 1.2 1.55
 45 8 -1 3.8 2.63
 46 -8 1 17.32 3.26
 46 8 1 12.86 3.47
 0 -9 -1 0.69 0.9
 0 9 -1 -0.97 1.23
 -1 -9 -1 349.59 9.95
 -1 9 -1 360.75 11.02
 1 9 -1 368.85 11.45
 1 -9 -1 347.37 9.79
 2 -9 -1 6.52 1.52
 -2 9 -1 5.92 1.75
 2 9 -1 7.01 2.08
 3 -9 -1 274.56 8.56
 3 9 -1 274.66 10.17
 -3 9 -1 260.47 9.02
 4 -9 1 48.31 3.68
 -4 9 -1 44.65 3.81
 4 -9 -1 40.24 3.67
 4 9 -1 42.2 4.48
 5 9 -1 587.11 15.34
 5 -9 -1 579.82 12.51
 5 -9 1 574.69 11.6
 6 -9 1 23.55 2.65
 6 9 1 20.57 3.16
 6 9 -1 20.56 3.24
 6 -9 -1 23 2.7
 7 9 -1 1857.69 28.22
 7 9 1 1902.02 27.58
 7 -9 1 1898.3 20.8
 7 -9 -1 1849.57 22.86
 8 -9 -1 16.59 2.31
 8 9 1 16.31 2.97
 8 -9 1 17.33 2.09
 8 9 -1 15.99 2.27
 9 -9 1 2516 24.12
 9 9 1 2481.13 32.11
 9 -9 -1 2482.8 26.91
 9 9 -1 2467.24 33.52
 10 -9 1 -0.24 0.62
 -10 9 1 0.79 0.79
 10 -9 -1 -0.41 0.81
 10 9 1 -2.85 1.53
 10 9 -1 -0.76 1.23
 11 9 -1 2299.04 33.33
 11 9 1 2364.46 32.33
 11 -9 -1 2371.58 27.52
 11 -9 1 2414.11 24.47
 12 9 1 5.31 2.01
 12 9 -1 5.53 1.74
 12 -9 -1 5.09 1.56
 12 -9 1 5.8 1.35
 13 9 -1 2248.53 34.32
 13 -9 -1 2300.74 28.28
 13 9 1 2230.16 32.56
 13 -9 1 2282.47 24.99
 14 -9 -1 6.86 1.98
 14 9 1 6.51 2.08
 14 -9 1 7.78 1.91
 14 9 -1 6 2.33
 15 9 1 158.5 9.02
 15 -9 -1 144.44 7.43
 15 -9 1 151.56 6.63
 15 9 -1 146.29 9.13
 16 -9 1 0.52 0.83
 16 9 -1 1.8 1.72
 16 -9 -1 0.23 0.95
 16 9 1 -1.61 1.6
 17 9 -1 8.42 2.47
 17 -9 -1 7.54 1.84
 17 -9 1 7.88 1.64
 17 9 1 7.79 3.23
 18 9 -1 3.33 2.13
 18 -9 -1 3.92 1.6
 18 -9 1 3.88 1.41
 18 -9 1 3.72 1.83
 18 9 1 1.44 1.15
 19 -9 -1 3.74 1.79
 19 9 1 2.18 1.65
 19 -9 -1 3.01 1.42
 19 -9 1 1.67 2.02
 19 9 -1 2.25 1.69
 20 -9 1 7.03 2.98
 20 9 1 4.96 2.52
 20 9 -1 9.73 3.65
 20 -9 -1 3.85 1.87
 20 -9 -1 5.83 2.58
 21 -9 -1 540.39 18.85
 21 -9 -1 569.27 17.06
 21 -9 1 573.47 19.77
 21 9 1 586.78 20.62
 22 9 1 44.49 6.36
 22 -9 -1 41.7 4.93
 22 -9 -1 43.07 5.97
 22 -9 1 45 6.17
 23 -9 1 1883.71 37.04
 23 9 1 1845.28 38.72
 23 -9 -1 1851.8 32.45
 23 -9 -1 1872.33 36.43
 24 -9 1 7.85 3.55
 24 -9 -1 6.49 2.11
 24 9 1 5.47 2.73
 24 -9 -1 6.94 3.24
 25 9 1 1444.67 35.78
 25 -9 -1 1416.56 29.99
 25 -9 -1 1469.98 33.38
 25 -9 1 1511.7 34.23
 26 -9 1 12.03 3.1
 26 -9 -1 10.42 3.14
 26 9 1 14.11 4.14
 27 -9 1 925.81 27.83
 27 -9 -1 914.98 26.78
 28 -9 1 13.02 3.91
 28 -9 -1 6.92 2.46
 29 -9 1 142.25 11.17
 29 9 -1 142.04 14.11
 29 -9 -1 130.94 10.36
 30 -9 -1 8.77 3.1
 30 -9 1 8.54 3.52
 30 9 -1 10.67 4.59
 31 -9 -1 131.72 10.67
 31 9 -1 143.29 14.72
 31 9 1 127.01 13.52
 31 -9 1 136.3 11.19
 32 9 -1 36 7.72
 32 -9 -1 37.03 5.89
 32 -9 1 39.53 6.35
 32 9 1 28.83 6.79
 33 -9 1 20.57 5.2
 33 -9 -1 20.6 4.22
 34 -9 -1 5.67 2.63
 34 -9 1 9.49 3.58
 35 -9 -1 137.3 10.77
 35 -9 1 140.98 11.3
 36 -9 1 11.92 3.64
 36 -9 -1 10.96 3.38
 37 -9 -1 135.49 10.64
 37 -9 1 143.39 11.33
 38 -9 -1 7.84 3.14
 38 -9 1 10.69 3.74
 39 -9 -1 252.52 14.35
 39 -9 1 267.73 15.2
 40 -9 -1 6.79 2.82
 40 -9 1 7.45 3.28
 41 -9 -1 488.66 19
 41 -9 1 518.66 20.31
 42 9 -1 11.67 3.4
 42 -9 -1 14.11 3.25
 42 -9 1 19.39 4.24
 42 9 1 15.06 4.01
 43 9 -1 484.6 19.39
 43 9 1 474.42 19.81
 43 -9 -1 470.54 17.7
 43 -9 1 515.84 18.99
 44 9 1 5.26 2.63
 44 -9 -1 9.42 2.26
 44 9 -1 4.8 2.58
 44 -9 1 3.44 1.94
 45 9 -1 185.79 10.86
 45 9 1 213.92 12.25
 45 -9 1 213.61 11.22
 46 9 1 10.41 2.75
 0 -10 -1 179.23 8.82
 0 10 -1 184.46 10.25
 -1 10 -1 7.43 2.26
 1 -10 -1 9.38 2.32
 1 10 -1 8.61 2.74
 -1 -10 -1 9.98 2.3
 2 -10 -1 12.13 2.3
 2 10 -1 11.38 2.56
 -2 10 -1 9.8 2.76
 3 -10 -1 6.74 2
 -3 10 -1 1.92 1.42
 3 10 -1 2.22 1.89
 4 10 -1 14.89 3.9
 4 10 1 14.78 3.65
 4 -10 -1 19.6 2.9
 -4 10 -1 19.72 3.24
 5 10 1 1.54 1.5
 5 -10 1 2.02 1.24
 5 10 -1 2.24 1.65
 5 -10 -1 1.51 1.17
 6 -10 -1 52.91 5.21
 6 10 -1 62.91 6.27
 6 -10 1 60.7 4.78
 6 10 1 51.94 6.49
 7 10 -1 -1.82 1.99
 7 10 1 0.86 0.98
 7 -10 -1 -1.09 1
 7 -10 1 0.24 0.79
 -8 10 1 85.24 6.91
 8 -10 -1 94.83 6.6
 8 -10 1 94.83 5.89
 8 10 -1 77.15 8.12
 8 10 1 98.19 8.07
 -9 10 1 -1.12 1.1
 9 -10 1 0.26 0.8
 9 10 -1 -3.53 2.4
 9 10 1 -1.22 1.49
 9 -10 -1 -0.2 0.72
 10 -10 1 93.49 6.03
 10 10 -1 103.75 8.22
 10 10 1 99.75 7.96
 10 -10 -1 97.02 6.99
 11 10 1 -2.29 1.78
 11 -10 1 0.1 0.87
 11 -10 -1 -1.66 1.07
 11 10 -1 -0.59 1.2
 12 -10 -1 101.45 6.9
 12 -10 1 87.89 5.93
 12 10 -1 80.51 8.73
 12 10 1 105.14 8.49
 13 -10 -1 -0.33 0.8
 13 -10 1 -0.66 0.73
 13 10 1 -0.67 1.63
 13 10 -1 -0.52 1.72
 14 -10 1 135.47 7.28
 14 10 -1 148.03 10.52
 14 10 1 154.08 11.16
 14 -10 -1 150.98 8.44
 15 -10 1 1.29 1.06
 15 10 1 1.18 1.49
 15 10 -1 2.86 1.95
 15 -10 -1 2.98 1.34
 16 -10 1 32.2 3.73
 16 10 1 39.52 5.69
 16 -10 -1 40.01 4.88
 16 10 -1 38.08 5.6
 17 10 -1 -0.43 1.72
 17 -10 1 -0.1 0.88
 17 10 1 1.53 1.28
 17 -10 -1 0.1 0.96
 17 -10 1 0.29 1.11
 18 10 -1 10.91 3.59
 18 -10 -1 11.05 2.7
 18 -10 -1 12.28 3.49
 18 10 1 13.33 3.67
 18 -10 1 11.21 3.59
 19 -10 1 -1.3 1.59
 19 10 1 0.62 1.2
 19 -10 -1 -0.17 1.45
 19 -10 -1 -0.52 1.19
 19 10 -1 -1.17 1.69
 20 10 1 30.01 5.47
 20 -10 1 22.35 5
 20 -10 -1 25.99 4.98
 20 -10 -1 22.21 4.22
 20 -10 1 19.79 4.26
 20 10 -1 28.3 5.32
 21 -10 1 -0.33 1.72
 21 -10 -1 0.88 1.92
 21 -10 -1 1.16 1.37
 21 10 1 0.6 1.39
 21 -10 1 1.38 2.11
 22 -10 -1 39.18 6.54
 22 -10 -1 38.06 5.41
 22 10 1 35.2 6.65
 22 -10 1 39.77 6.8
 23 -10 -1 -1.94 2.11
 23 -10 1 -1.97 2.7
 23 10 1 -1.36 1.99
 23 -10 -1 0.81 0.92
 24 10 1 55.81 8.32
 24 -10 -1 61.68 8.49
 24 -10 -1 48 6.25
 24 -10 1 56.45 8.29
 25 10 1 -3.3 2.8
 25 -10 -1 0.29 1.69
 25 -10 1 -2.72 2.36
 26 -10 1 37.2 6.91
 26 -10 -1 33.43 6.67
 26 10 1 28.25 7.02
 27 -10 1 -1.45 2.34
 27 -10 -1 -4.06 2.86
 28 -10 1 9.28 3.99
 28 -10 -1 6.8 3.11
 29 -10 -1 -0.21 1.64
 29 -10 1 3.73 2.27
 30 10 -1 6.72 4.75
 30 -10 -1 9.84 3.8
 30 -10 1 10.3 4.42
 31 -10 1 -0.25 2.4
 31 -10 -1 -0.71 2.08
 31 10 -1 3.29 4.19
 32 -10 1 49.46 7.59
 32 10 -1 33.63 8.65
 32 -10 -1 48.41 7.42
 32 10 1 30.78 8.73
 33 -10 1 2.69 2.26
 33 -10 -1 1.91 2.24
 34 -10 1 27.75 5.72
 34 -10 -1 25.15 5.32
 35 -10 1 -2.37 2.26
 35 -10 -1 2.33 2.02
 36 -10 -1 3.47 2.42
 36 -10 1 7.02 3.42
 37 -10 -1 -0.54 1.68
 37 -10 1 -3.44 2.66
 38 -10 -1 4.59 2.21
 38 -10 1 7.06 3.19
 39 -10 1 0.12 1.62
 39 -10 -1 -1.1 1.5
 40 -10 -1 11.13 3.48
 40 -10 1 8.96 3.48
 41 -10 -1 1.31 1.77
 41 -10 1 2.59 1.98
 42 -10 1 20.31 4.51
 42 -10 -1 23.85 5.18
 43 10 1 1.2 1.59
 43 -10 1 -3.99 2.1
 43 -10 -1 -1.25 1.21
 43 10 -1 -0.34 1.6
 44 10 1 10.74 3.81
 44 -10 1 13.13 3.5
 44 -10 -1 8.6 2.67
 44 10 -1 8.04 2.96
 45 -10 1 1.98 1.66
 45 10 -1 -0.25 1.37
 45 10 1 -0.13 1.68
 0 11 -1 1.38 1.16
 0 11 1 -1.07 1.55
 0 -11 -1 0.01 0.82
 1 -11 -1 194.11 8.14
 -1 11 -1 202.95 9.87
 -1 11 1 193.89 10.49
 1 11 1 194.22 10.01
 1 11 -1 196.1 10.06
 2 11 -1 34.36 4.39
 -2 11 -1 37.48 4.47
 -2 11 1 28.03 4.57
 2 11 1 28.72 4.33
 2 -11 -1 34.07 3.67
 3 -11 -1 54.36 4.35
 3 11 -1 51.55 5.32
 3 11 1 45.9 4.97
 -3 11 -1 52.08 4.73
 -3 11 1 46.4 5.28
 4 11 1 1.07 1.31
 -4 11 1 2.13 1.34
 -4 11 -1 2.42 1.2
 4 11 -1 3.29 1.9
 4 -11 -1 2.39 1.27
 5 11 -1 77.34 6.44
 -5 11 1 79.14 6.6
 5 11 1 86.75 6.65
 5 -11 -1 78.59 5.19
 6 11 -1 15.31 3.2
 -6 11 1 15.89 3.27
 6 11 1 15.42 3.22
 6 -11 -1 18.22 2.8
 6 -11 1 16.8 2.74
 7 11 1 971.85 22.27
 7 11 -1 1062.32 23.76
 7 -11 1 1014.96 17.59
 7 -11 -1 959.45 18.2
 -7 11 1 1042.2 22.21
 8 11 -1 2.54 1.68
 -8 11 1 2.72 1.69
 8 -11 -1 2 1.03
 8 11 1 2.21 1.37
 8 -11 1 2.76 1.17
 9 11 -1 1277.81 26.59
 9 -11 1 1281.8 19.76
 9 11 1 1249.58 25.44
 9 -11 -1 1236.48 20.93
 10 11 -1 4.15 2.03
 10 11 1 2.2 1.81
 10 -11 1 2.12 1.35
 10 -11 -1 2.03 1.12
 11 -11 -1 2921.25 33.41
 11 -11 1 2948.45 30.32
 11 11 -1 3003.55 41.59
 11 11 1 2924.74 39.31
 12 -11 -1 16.2 2.75
 12 -11 1 17.3 2.52
 12 11 1 22.19 4.36
 12 11 -1 18.37 3.45
 13 -11 -1 537.83 14.84
 13 11 1 523.08 17.19
 13 11 -1 536.78 18.15
 13 -11 1 557.61 13.43
 14 -11 1 0.79 0.91
 14 11 -1 1.51 1.35
 14 11 1 -0.33 1.05
 14 -11 -1 0.56 0.87
 15 -11 -1 88.84 6.27
 15 -11 1 90.84 5.57
 15 11 -1 90.22 7.47
 15 11 1 88.74 7.42
 16 -11 1 -0.27 0.64
 16 11 -1 2.24 1.59
 16 11 1 0 1.39
 16 -11 -1 -0.47 0.74
 16 -11 1 3.21 1.71
 17 -11 1 182.54 10.4
 17 11 -1 180.55 11.21
 17 -11 -1 160.31 9.89
 17 11 1 182.74 10.98
 17 -11 -1 177.38 9.21
 17 -11 1 160.29 10.05
 18 -11 1 6.76 2.53
 18 -11 -1 9.04 2.65
 18 11 1 4.42 1.81
 18 11 -1 3.49 2.07
 18 -11 1 6.38 2.82
 18 -11 -1 6.86 2.25
 19 -11 -1 24.39 3.62
 19 -11 1 29.35 4.55
 19 -11 1 22.56 4.06
 19 -11 -1 28.65 4.44
 19 11 1 27.76 4.72
 19 11 -1 27.84 4.69
 20 -11 -1 7.08 2.22
 20 -11 1 6.18 2.4
 20 -11 1 3.83 2.28
 20 11 -1 4.65 2.56
 20 11 1 7.07 2.99
 20 -11 -1 9.76 3.08
 21 11 1 206.03 13.1
 21 -11 -1 203.73 10.79
 21 -11 -1 193.57 11.71
 21 -11 1 167.73 10.71
 21 -11 1 193.71 11.79
 22 -11 -1 5.74 2.12
 22 -11 -1 8.58 2.94
 22 11 1 4.87 2.81
 22 -11 1 9.4 3.75
 23 -11 -1 795.83 23.71
 23 -11 1 792.17 24.19
 23 -11 -1 731.76 21.22
 23 11 1 767.9 26.13
 24 11 1 13.9 3.83
 24 -11 -1 14.91 3.75
 24 -11 1 14.12 3.57
 25 -11 1 755.65 24.27
 25 11 1 708.53 26.52
 25 -11 -1 732.05 23.45
 26 -11 -1 6.72 2.56
 26 11 1 10.11 2.81
 26 -11 1 10.07 3.24
 27 -11 -1 200.82 12.7
 27 -11 1 190.97 12.76
 28 -11 -1 2.44 2.37
 28 -11 1 3.14 1.59
 29 -11 -1 80.95 8.27
 29 -11 1 87.64 8.69
 30 -11 1 19.45 4.92
 30 11 -1 17.34 6.63
 30 -11 -1 20.45 4.42
 31 11 -1 15.01 4.96
 31 -11 1 16.83 4.29
 31 -11 -1 14.71 4.15
 32 -11 1 7.63 2.54
 32 -11 -1 4.87 2.36
 33 -11 -1 12.08 3.15
 33 -11 1 14.14 4.21
 34 -11 1 21.83 4.74
 34 -11 -1 24.14 4.96
 35 -11 -1 3.16 2.33
 35 -11 1 2.04 1.61
 36 -11 1 7.52 3.02
 36 -11 -1 0.02 1.76
 37 -11 1 3.58 2.55
 37 -11 -1 -0.65 1.57
 38 -11 -1 6.16 2.76
 38 -11 1 6.89 3.25
 39 -11 1 60.07 7.17
 39 -11 -1 58.51 7.04
 40 -11 -1 14.62 3.3
 40 -11 1 14.18 3.88
 41 -11 -1 161.77 10.83
 41 -11 1 176.96 11.67
 42 -11 -1 6.03 2.18
 42 -11 1 2.98 1.76
 43 11 -1 194.45 12.12
 43 -11 1 219.56 11.88
 43 11 1 201.11 12.9
 43 -11 -1 171.81 10.26
 44 -11 1 7.79 2.23
 44 11 1 7.07 2.67
 44 11 -1 8.81 2.55
 45 11 1 147.31 9.88
 0 12 -1 163.6 11.27
 0 12 1 152.2 11.55
 1 12 1 2.98 1.98
 -1 12 1 4.41 2.39
 1 12 -1 1.42 1.72
 1 -12 -1 3.86 1.68
 -1 12 -1 2.36 1.32
 2 12 -1 29.38 4.84
 2 12 1 21.91 4.32
 -2 12 1 22.1 4.73
 2 -12 -1 32.51 4
 -2 12 -1 19.39 4.25
 3 12 1 2.14 1.68
 -3 12 1 0.05 1.39
 -3 12 -1 0.66 1.47
 3 12 -1 0.38 1.49
 3 -12 -1 0.74 0.87
 -4 12 1 0.44 1.6
 -4 12 -1 1.42 1.3
 4 -12 -1 0.84 0.89
 4 12 1 1.63 1.85
 4 12 -1 -0.42 1.3
 5 -12 -1 0 0.93
 5 12 -1 -0.89 1.63
 5 12 1 1.2 1.49
 -5 12 1 1.41 2.14
 -6 12 1 0.51 2.87
 6 -12 -1 2.05 1.55
 6 12 -1 -0.49 1.37
 6 12 1 -0.34 1.29
 7 -12 -1 -0.95 0.97
 -7 12 1 1.04 1.64
 7 12 -1 0.16 1.73
 7 -12 1 2.32 1.2
 7 12 1 1.69 1.51
 8 12 -1 24.98 4.95
 8 -12 -1 30.84 3.95
 8 12 1 23.74 4.91
 -8 12 1 18.42 3.56
 8 -12 1 26.82 3.54
 9 12 1 0.94 1.21
 9 -12 -1 -1.46 1.07
 9 12 -1 1.51 1.62
 9 -12 1 1.94 1.18
 10 -12 1 43.14 4.6
 10 12 1 43.51 6.61
 10 12 -1 53.95 7.2
 10 -12 -1 45.12 5.2
 11 12 1 2.46 1.64
 11 -12 -1 -0.43 0.72
 11 -12 1 0.11 0.72
 11 12 -1 -0.51 1.36
 12 -12 1 36.43 4.19
 12 -12 -1 34.4 4.55
 12 12 1 34.64 5.9
 12 12 -1 33.91 6.23
 13 12 1 -0.76 1.57
 13 12 -1 -1.11 1.91
 13 -12 -1 1.51 0.88
 13 -12 1 -1.75 0.85
 14 -12 1 2.15 1.34
 14 12 1 -1.07 1.39
 14 -12 1 3.14 2.11
 14 -12 -1 1.01 1.16
 14 12 -1 1.17 1.22
 15 12 1 1.24 1.76
 15 -12 -1 0.52 1.13
 15 -12 1 1.1 1.72
 15 12 -1 -1.04 1.67
 15 -12 1 1.11 1.91
 15 -12 1 -0.37 0.96
 15 -12 -1 0.01 0.99
 16 -12 -1 10.28 3.62
 16 -12 -1 6.22 2.18
 16 12 1 4.28 2.77
 16 12 -1 10.84 3.39
 16 -12 1 9.26 3.55
 16 -12 1 13.99 3.95
 17 -12 1 -1.55 1.62
 17 12 -1 -1.8 1.64
 17 -12 1 0.83 1.74
 17 12 1 0.57 1.36
 17 -12 -1 -2.01 1.8
 17 -12 -1 1.82 0.94
 18 12 -1 6.04 3.2
 18 -12 1 6.16 3.29
 18 12 1 4.96 2.6
 18 -12 1 5.28 2.83
 18 -12 -1 6.5 3.13
 18 -12 -1 5.57 2.32
 19 -12 -1 0.99 1.35
 19 12 -1 1.85 2.37
 19 -12 1 3.68 2.29
 19 -12 1 0.48 1.38
 19 12 1 2.41 2.47
 19 -12 -1 3.56 2.5
 20 -12 -1 3.05 1.93
 20 -12 -1 2.09 1.6
 20 12 1 3.4 2.3
 20 -12 1 2.13 1.75
 20 -12 1 0.32 1.89
 21 -12 -1 1.02 1.5
 21 12 1 2.13 2.45
 21 -12 -1 -1.61 1.3
 21 -12 1 2.05 2.19
 22 -12 1 1.76 1.97
 22 12 1 1.54 1.77
 22 -12 -1 1.28 1.96
 23 -12 -1 2.41 2.66
 23 12 1 1.41 2.02
 23 -12 1 2.37 2.22
 24 -12 1 8.84 4
 24 12 1 4.53 2.95
 24 -12 -1 5.51 3.27
 25 12 1 1.84 3.06
 25 -12 1 -1.24 2.76
 25 -12 -1 -1.84 2
 26 12 1 0.14 1.8
 26 -12 -1 3.06 2.83
 26 -12 1 2.04 2.23
 27 -12 1 3.05 2.53
 27 -12 -1 -1.51 1.84
 28 -12 1 1.23 2.54
 28 -12 -1 -1.09 1.5
 29 -12 1 4.24 3.29
 29 -12 -1 1.21 1.72
 30 -12 -1 16.35 4.76
 30 -12 1 20.3 5.12
 31 -12 1 0.13 1.89
 31 -12 -1 1.11 1.71
 32 -12 -1 5.27 2.37
 32 -12 1 4.9 3.02
 33 -12 -1 2.71 2.75
 33 -12 1 0.3 1.78
 34 -12 -1 0.57 1.68
 34 -12 1 5.09 2.93
 35 -12 -1 1.38 2
 35 -12 1 -0.82 2
 36 -12 -1 -0.13 1.85
 36 -12 1 0.14 1.87
 37 -12 1 1.65 1.43
 37 -12 -1 0.38 1.67
 38 -12 1 3.87 2.65
 38 -12 -1 2.3 2.07
 39 -12 1 8.48 3.19
 39 -12 -1 4.39 2.81
 40 -12 -1 1.87 2
 40 -12 1 2.88 1.96
 41 -12 -1 1.04 1.31
 41 -12 1 2.25 1.75
 42 -12 1 1.92 1.89
 42 -12 -1 1.65 1.25
 43 12 -1 -1.3 1.39
 43 12 1 1.37 1.66
 43 -12 1 -2.28 1.47
 44 12 -1 3.98 2.11
 44 12 1 5 2.64
 44 -12 1 6.12 2.18
 0 13 1 -2.53 2.62
 0 13 -1 -1.67 2.35
 1 13 1 1012.97 26.6
 -1 13 -1 979.84 24.83
 -1 13 1 1036.65 27.41
 1 13 -1 1015.97 25.97
 2 -13 -1 0.5 1.36
 -2 13 1 -1.32 1.93
 2 13 -1 1.01 1.36
 2 13 1 -0.72 1.38
 -2 13 -1 0.28 1.46
 3 -13 -1 1183.33 22.02
 -3 13 -1 1295.37 27.2
 3 13 -1 1278.56 29.53
 -3 13 1 1345.31 31.43
 3 13 1 1212.98 28.71
 -4 13 -1 13.35 3.07
 4 13 1 9.65 3.22
 -4 13 1 10.01 3.17
 4 -13 -1 11.74 2.44
 4 13 -1 9.67 3.12
 -5 13 1 38.74 5.1
 5 -13 -1 34.47 3.8
 5 13 1 36.67 5.13
 5 13 -1 32.54 4.96
 6 13 1 1.24 1.56
 -6 13 1 3.01 2
 6 -13 -1 1.36 1.31
 6 13 -1 -0.4 1.66
 -7 13 1 3.66 1.57
 7 13 -1 4.67 2.15
 7 -13 -1 8.84 2.02
 7 13 1 4.87 2.26
 8 -13 1 9.65 2.17
 8 -13 -1 10.11 2.29
 8 13 -1 13.24 3.41
 8 13 1 9.63 2.97
 9 -13 1 170.43 8.21
 9 13 1 158.88 10.2
 9 13 -1 168.02 11.11
 9 -13 -1 162.14 8.37
 10 -13 -1 1.63 1.23
 10 -13 1 3.86 1.43
 10 13 -1 3.37 1.89
 10 13 1 4.56 2.21
 11 13 -1 95.11 8.25
 11 -13 -1 86.39 6.19
 11 -13 1 87.96 6.05
 11 13 1 80.96 7.47
 12 -13 1 0.58 1.23
 12 13 1 0.61 1.51
 12 -13 -1 -2.59 2.42
 12 -13 -1 0.58 1.07
 12 -13 1 2.28 1.4
 12 -13 1 0.54 0.68
 12 13 -1 -0.04 1.58
 13 13 1 162.84 10.45
 13 13 -1 171.05 11.1
 13 -13 1 159.11 8.1
 13 -13 1 154.46 9.31
 13 -13 -1 172.3 10.83
 13 -13 -1 159.99 8.74
 13 -13 1 165.03 10.33
 13 -13 1 165.16 10.14
 14 -13 1 7.51 2.88
 14 -13 1 8.21 3.15
 14 13 -1 7.52 2.59
 14 -13 -1 7.35 2.2
 14 -13 1 6.78 1.63
 14 -13 -1 6.45 2.01
 14 13 1 7.8 2.68
 14 -13 1 5.72 2.21
 15 -13 -1 354.87 14.62
 15 -13 1 392.95 16.26
 15 13 -1 388.09 17.15
 15 -13 1 352.55 14.66
 15 13 1 368.17 16.27
 15 -13 -1 373.02 13.76
 16 13 1 9.02 2.77
 16 -13 1 7.17 2.38
 16 -13 -1 7.71 2.18
 16 -13 1 3.13 2.16
 16 13 -1 3.65 1.45
 16 -13 -1 7.36 2.62
 17 -13 1 952.62 25.78
 17 -13 -1 935.53 22.57
 17 13 -1 898.62 27.06
 17 13 1 936.47 27.1
 17 -13 1 880.82 23.88
 17 -13 -1 892.6 23.96
 18 -13 -1 3.37 1.72
 18 13 -1 -0.72 1.48
 18 -13 -1 1.67 1.19
 18 -13 1 2.05 2.01
 18 13 1 2.56 2.2
 18 -13 1 0.99 1.8
 19 -13 -1 205.12 12.1
 19 -13 -1 199.55 10.84
 19 -13 1 196.85 11.7
 19 13 1 207.57 13.31
 19 -13 1 201.26 12.25
 19 13 -1 202.4 13.3
 20 -13 -1 3.99 2.3
 20 -13 -1 1.76 1.53
 20 -13 1 2.73 2.1
 20 13 1 2.92 2.21
 20 -13 1 3.76 2.52
 21 -13 1 26.72 4.83
 21 13 1 28.59 5.58
 21 -13 -1 25.05 5.29
 22 -13 -1 3.46 2.18
 22 -13 1 6.4 3.22
 22 13 1 5.24 3.26
 23 -13 -1 54.52 6.68
 23 13 1 53.22 7.14
 23 -13 1 49.2 6.41
 24 -13 -1 1.86 2.17
 24 13 1 -0.48 1.92
 24 -13 1 2.66 2.59
 25 -13 -1 36.12 5.63
 25 -13 1 35.6 5.58
 25 13 1 32.62 5.98
 26 -13 -1 1.66 1.93
 26 -13 1 1.95 1.69
 26 13 1 -1.82 3.09
 27 -13 1 17.36 4.46
 27 -13 -1 11.24 3.17
 28 -13 1 2.97 2.38
 28 -13 -1 1.14 1.86
 29 -13 1 229.35 14.27
 29 -13 -1 217.35 13.69
 30 -13 -1 -3.16 2.53
 30 -13 1 -1.08 1.72
 31 -13 -1 111.4 9.85
 31 -13 1 119.7 10.23
 32 -13 1 5.04 2.87
 32 -13 -1 5.31 2.75
 33 -13 1 330.54 17.24
 33 -13 -1 320.3 16.44
 34 -13 1 6.27 2.83
 34 -13 -1 1.72 1.81
 35 -13 1 246.03 14.86
 35 -13 -1 222.2 13.56
 36 -13 1 8.19 3.28
 36 -13 -1 1.44 2.34
 37 -13 -1 100.46 9.04
 37 -13 1 104.56 9.43
 38 -13 1 3.86 2.52
 38 -13 -1 7.88 3.32
 39 -13 -1 13.92 3.84
 39 -13 1 12.94 3.23
 40 -13 -1 8.88 3.57
 40 -13 1 8.91 2.95
 41 -13 1 10.64 3.06
 41 -13 -1 6.92 2.26
 42 -13 1 3.8 1.6
 42 -13 -1 2.94 1.73
 43 -13 1 33.78 4.51
 43 13 1 36.61 5.4
 43 13 -1 32.09 4.73
 44 13 1 -1.18 2.16
 0 14 -1 250.4 15.42
 0 14 1 239.76 16.7
 1 14 -1 -5.27 3.11
 -1 14 1 0.43 1.64
 1 14 1 -0.79 1.57
 -1 14 -1 -2.9 1.95
 -2 14 -1 187.59 14.04
 2 14 1 202.27 15.61
 2 14 -1 191.21 14.86
 -2 14 1 222.09 15.63
 3 14 1 -2.18 2.14
 3 14 -1 2.85 2.17
 3 -14 -1 -0.38 1.06
 -3 14 -1 0.3 1.22
 -3 14 1 -1.61 1.82
 -4 14 1 99.13 10.58
 4 14 -1 104.44 10.23
 4 -14 -1 121.18 7.72
 4 14 1 114.94 10.29
 -5 14 1 0.44 2.12
 5 14 1 4.11 2.52
 5 14 -1 2.1 1.41
 5 -14 -1 2.59 1.47
 6 -14 -1 73.06 6.18
 6 14 -1 78.18 8.94
 -6 14 1 60.43 7.83
 6 14 1 75.33 8.51
 7 14 -1 4.77 2.47
 7 14 1 0.78 1.77
 7 -14 -1 1.19 1.38
 8 14 1 26.47 5.74
 8 14 -1 29.03 6.14
 8 -14 -1 30.94 4.36
 9 14 -1 1.22 1.46
 9 14 1 2.19 2.1
 9 -14 -1 1.22 1.68
 9 -14 -1 4.13 1.6
 9 -14 1 2.36 1.74
 9 -14 1 -0.26 1.31
 10 -14 -1 8.37 2.65
 10 -14 1 9.02 2.39
 10 -14 -1 11.2 3.56
 10 14 -1 14.17 3.9
 10 -14 1 11.49 3.11
 10 -14 1 7.23 3.15
 10 -14 1 10.3 3.39
 10 14 1 8.09 2.75
 11 -14 1 0.17 0.73
 11 -14 -1 -0.9 1.47
 11 -14 1 -1.59 1.56
 11 -14 -1 1.33 1.93
 11 14 1 -1.21 1.2
 11 14 -1 1.57 2.05
 11 -14 -1 0.16 0.93
 11 -14 1 -3.94 2.3
 11 -14 1 0.11 1.33
 12 14 1 39.63 6.38
 12 -14 1 34.14 4.52
 12 -14 1 45.08 6.39
 12 -14 -1 49.9 6.14
 12 -14 -1 46.25 6.68
 12 -14 1 39.76 5.8
 12 14 -1 39.92 6.78
 12 -14 -1 45.69 5.3
 12 -14 1 47.33 6.69
 13 -14 -1 1.97 1.81
 13 -14 1 0 1.14
 13 -14 1 -1.01 2.33
 13 14 -1 -2.93 2.21
 13 -14 1 -0.8 1.22
 13 -14 -1 1.34 1.1
 13 -14 -1 3.27 2.92
 13 14 1 -1.59 1.32
 13 -14 1 -0.41 2.01
 14 -14 1 80.11 8.74
 14 14 -1 74.27 9.14
 14 -14 -1 71.38 6.81
 14 -14 1 107.89 9.87
 14 -14 1 85.04 8.36
 14 14 1 78.36 9.01
 14 -14 -1 82.49 8.29
 15 -14 -1 0.75 1.04
 15 -14 1 -0.15 2.26
 15 14 1 0.48 1.58
 15 -14 -1 -0.26 1.41
 15 -14 1 -0.54 1.72
 15 14 -1 0.75 1.75
 16 -14 -1 33.72 4.89
 16 14 1 37.09 5.97
 16 -14 -1 48.19 6.54
 16 -14 1 48.63 6.6
 16 -14 1 52.04 6.77
 16 14 -1 39.23 7.24
 17 -14 1 1.01 1.52
 17 -14 1 2.21 1.83
 17 -14 -1 1.16 1.22
 17 14 -1 -2.88 3.03
 17 14 1 0.65 1.43
 17 -14 -1 -3.99 2.42
 18 -14 -1 19.71 4.17
 18 14 -1 14.32 5.1
 18 -14 1 16.76 4.26
 18 -14 -1 12.82 3.39
 18 -14 1 15.46 4.53
 18 14 1 17.43 4.98
 19 14 -1 3.45 2.2
 19 -14 -1 1.57 1.45
 19 -14 -1 0.26 1.54
 19 -14 1 0.5 1.91
 19 14 1 2.76 2.79
 19 -14 1 2.88 2
 20 -14 -1 42.21 6.55
 20 14 1 49.06 7.59
 20 -14 1 47.77 7.2
 21 14 1 -0.3 1.69
 21 -14 1 2.19 2.13
 21 -14 -1 2.02 1.67
 22 -14 1 37.95 6.69
 22 14 1 37.32 6.88
 22 -14 -1 39.66 6.4
 23 -14 1 2.84 1.9
 23 14 1 4.91 3.61
 23 -14 -1 4.3 3.08
 24 -14 -1 35.45 6.53
 24 14 1 33.69 6.72
 24 -14 1 45.22 7.25
 25 -14 -1 4.41 2.42
 25 14 1 2.15 1.86
 25 -14 1 1.43 1.66
 26 -14 1 42.23 6.91
 26 14 1 37.43 7.81
 26 -14 -1 42.08 6.89
 27 -14 1 -0.83 1.76
 27 -14 -1 3.69 2.26
 28 -14 1 13.44 4.31
 28 -14 -1 11.48 4.26
 29 -14 1 -0.38 2.08
 29 -14 -1 -2.29 2.48
 30 -14 1 23.64 5.39
 30 -14 -1 22.68 5.31
 31 -14 -1 0.27 1.77
 31 -14 1 -0.24 1.52
 32 -14 -1 38.09 6.3
 32 -14 1 43.91 7.25
 33 -14 -1 3.81 3.43
 33 -14 1 -0.72 1.51
 34 -14 -1 36.56 6.29
 34 -14 1 42.92 6.57
 35 -14 -1 3.84 2.09
 35 -14 1 3.82 2.75
 36 -14 1 32.42 6.08
 36 -14 -1 28.13 5.41
 37 -14 1 6.82 2.91
 37 -14 -1 4.9 2.45
 38 -14 1 22.99 4.97
 38 -14 -1 15.98 3.99
 39 -14 -1 1.24 1.77
 39 -14 1 1.93 2.26
 40 -14 -1 12.96 3.47
 40 -14 1 24.96 4.8
 41 -14 -1 3.79 1.8
 41 -14 1 4.21 2.07
 42 -14 1 10.08 3.08
 43 14 -1 4.79 2.28
 0 15 1 -6.77 2.9
 0 15 -1 -0.8 2.58
 -1 15 1 2158.13 45.9
 1 15 1 2140.44 44.37
 1 15 -1 2125.85 42.89
 -1 15 -1 2155.71 42.24
 -2 15 1 3.8 2.18
 -2 15 -1 -2.2 2.21
 2 15 -1 -3.05 3.21
 2 15 1 -2.86 2.77
 -3 -15 1 1422.03 28.01
 3 -15 1 1371.08 27.1
 3 15 -1 1435.96 35.64
 -3 15 1 1426.35 36.66
 3 15 1 1403.13 35.41
 -4 -15 1 7.73 2.62
 4 15 1 3.08 2.54
 4 -15 1 5.94 1.9
 4 -15 -1 5.88 1.75
 -4 15 1 3.56 1.64
 4 -15 -1 8.44 2.69
 4 15 -1 1.5 1.77
 5 15 -1 992.28 30.57
 5 -15 1 1001.84 23.1
 -5 15 1 1042.04 29.75
 5 -15 -1 1036.66 22.78
 5 15 1 1062.09 29.98
 5 -15 -1 1007.99 25.69
 5 -15 1 1037.27 24.76
 5 -15 1 1034.26 25.62
 5 -15 -1 948.18 24.46
 6 -15 -1 7.93 2.42
 6 -15 -1 11.23 3.74
 6 -15 1 11.51 3.51
 6 15 1 7.47 3.32
 6 15 -1 5.98 3.55
 6 -15 1 12.34 3.97
 6 -15 1 13.22 3.03
 6 -15 -1 5.97 2.44
 7 15 -1 6.22 3.02
 7 -15 1 6.94 3.09
 7 -15 -1 11.45 4.04
 7 -15 -1 10.02 2.48
 7 -15 1 5.63 2.12
 7 -15 1 7.15 2.24
 7 -15 -1 6.25 2.03
 7 15 1 6.87 2.61
 8 -15 1 1.84 2.25
 8 -15 1 0.89 1.39
 8 15 -1 0.5 1.52
 8 -15 -1 0.85 1.37
 8 -15 -1 1.7 2.39
 8 -15 1 -0.2 1.72
 8 15 1 -1.48 1.87
 8 -15 -1 -0.84 1.27
 9 -15 -1 80.14 6.39
 9 -15 1 94.73 8.1
 9 -15 -1 82.8 7.59
 9 -15 1 79.87 6.76
 9 -15 1 91.37 7.65
 9 15 -1 89.15 8.75
 9 15 1 90.4 8.59
 9 -15 -1 83.97 7.04
 10 15 -1 1.63 1.86
 10 -15 -1 -1.22 1.2
 10 -15 1 1.94 1.98
 10 -15 1 -0.93 1.96
 10 -15 1 -0.28 1.28
 10 15 1 -0.6 1.55
 10 -15 -1 0.91 1.3
 10 -15 -1 3.61 2.64
 11 -15 -1 70.35 6.1
 11 -15 -1 70.28 6.74
 11 -15 1 77.06 6.91
 11 -15 1 85.26 7.81
 11 -15 1 68.81 6.37
 11 15 -1 75.03 8.03
 11 -15 -1 71.24 7.15
 11 15 1 75.77 7.71
 12 15 -1 16.68 3.93
 12 -15 1 15.41 3.5
 12 -15 -1 17.5 3.8
 12 -15 -1 13.37 3.53
 12 -15 1 19.39 4.33
 12 -15 -1 18.18 3.13
 12 15 1 14.15 3.53
 12 -15 1 14.12 3.44
 13 -15 1 331.56 14.74
 13 -15 1 286.12 13.43
 13 -15 1 327.98 15.52
 13 -15 -1 292.31 12.89
 13 15 1 306.04 15.78
 13 15 -1 323.22 16.74
 13 -15 -1 313.48 15.41
 13 -15 -1 314.26 14.34
 14 -15 -1 3.32 2.21
 14 15 -1 0 2.6
 14 -15 1 3.25 2.57
 14 -15 -1 1.18 1.66
 14 15 1 3.65 2.14
 14 -15 1 4.54 3.01
 14 -15 1 4.13 2.14
 15 -15 1 1001.87 25.72
 15 -15 -1 1031.72 26.14
 15 15 1 1042.13 29.8
 15 15 -1 1057.46 30.82
 15 -15 -1 1058.21 25.05
 15 -15 1 1099.07 27.66
 16 -15 1 19.14 3.7
 16 15 1 20.2 4.3
 16 -15 -1 25.52 4.06
 16 -15 1 20.71 4.41
 16 -15 -1 17.78 4.19
 16 15 -1 15.1 3.87
 17 15 -1 947.03 29.86
 17 -15 -1 946.82 25.85
 17 -15 1 982.76 27.23
 17 15 1 921.76 28.88
 17 -15 1 913.09 25.25
 17 -15 -1 944.06 24.63
 18 15 -1 13.2 4.21
 18 -15 1 14.43 3.6
 18 -15 1 21.03 4.74
 18 15 1 18.41 4.32
 18 -15 -1 16.91 3.37
 18 -15 -1 18.69 4.2
 19 15 1 467.77 21.26
 19 -15 -1 511.47 19.47
 19 -15 1 505.48 19.95
 19 -15 1 523.5 19.48
 20 -15 -1 9.06 3.26
 20 15 1 3.95 2.17
 20 -15 1 10.29 3.43
 21 -15 -1 83.39 8.58
 21 -15 1 92.27 8.76
 21 15 1 88.9 9.7
 22 -15 -1 6.5 3.7
 22 -15 1 7.36 3.13
 22 15 1 2.93 2.35
 23 15 1 38.68 6.55
 23 -15 1 40.1 6.21
 23 -15 -1 43.09 6.39
 24 -15 1 0.31 1.79
 24 -15 -1 2.79 1.58
 24 15 1 3 1.92
 25 -15 -1 2.85 2.43
 25 -15 1 2.39 2.68
 25 15 1 1.16 2.25
 26 -15 1 12.09 4.14
 26 -15 -1 3.71 2.16
 27 -15 1 192.43 13.2
 27 -15 -1 174.59 12.09
 28 -15 -1 -3.88 2.67
 28 -15 1 2.47 2.15
 29 -15 -1 132.72 10.97
 29 -15 1 149.82 11.61
 30 -15 -1 3.25 2.03
 30 -15 1 0.35 2.05
 31 -15 -1 615.7 22.45
 31 -15 1 593.63 23.09
 32 -15 1 -0.37 1.62
 32 -15 -1 0.36 1.63
 33 -15 -1 696.14 23.88
 33 -15 1 692.18 24.23
 34 -15 1 5.02 2.61
 34 -15 -1 8.49 3.09
 35 -15 -1 538.92 20.57
 35 -15 1 587.57 22.02
 36 -15 1 3.44 2.51
 36 -15 -1 3.87 2.87
 37 -15 1 263.65 14.52
 37 -15 -1 250.89 13.43
 38 -15 1 1.83 1.82
 38 -15 -1 5.72 1.82
 39 -15 1 46.81 6
 39 -15 -1 40.28 5.54
 40 -15 1 1.72 1.87
 40 -15 -1 2.08 1.41
 41 -15 1 2.2 1.71
 42 -15 1 1.21 1.37
 0 -16 -1 81.79 8.5
 0 16 1 52.18 8.66
 0 -16 -1 63.98 7.81
 0 -16 1 51.24 6.03
 0 -16 1 52.86 6.51
 0 16 -1 29.13 7.43
 -1 16 1 -2.63 3.3
 -1 16 -1 -2 2.24
 1 16 1 -0.98 2.75
 1 16 -1 -1.19 2.72
 1 -16 -1 1.46 1.85
 1 -16 -1 0.31 2.23
 1 -16 1 1.46 2.05
 -1 -16 -1 -3.95 2.43
 1 -16 1 -2.06 1.87
 -1 -16 1 -0.79 1.42
 2 -16 -1 191.52 12.28
 -2 -16 1 219.62 12.27
 -2 16 1 161.19 15.07
 2 16 -1 178.36 14.83
 -2 -16 -1 246.75 14.01
 2 -16 1 177.11 11.38
 2 16 1 166.21 16.06
 2 -16 1 176.21 11.63
 2 -16 -1 214.38 13.88
 3 -16 1 0.82 1.71
 3 16 1 -1.15 3.43
 3 -16 1 -2.9 1.97
 3 -16 -1 1.54 1.62
 -3 16 1 -1.56 2.51
 3 -16 1 -0.65 1.93
 -3 -16 1 -1.12 1.44
 3 16 -1 0.69 3.44
 3 -16 -1 -0.66 1.54
 4 -16 -1 241.51 14.53
 4 16 1 212.41 16.42
 4 -16 1 252.59 13.25
 4 -16 -1 268.52 14.11
 -4 16 1 198.72 16.04
 4 -16 1 241.81 13.3
 4 16 -1 223.03 17.1
 4 -16 1 252.57 14.94
 5 -16 1 4.5 2.29
 5 16 1 4.75 2.41
 5 -16 -1 5.54 2.48
 5 -16 1 1.66 1.62
 5 16 -1 0.9 1.96
 5 -16 1 7.13 3.44
 5 -16 -1 4.29 2.59
 6 -16 -1 92.15 8.33
 6 -16 1 90.85 8.91
 6 -16 1 95.66 8.18
 6 -16 1 85.88 8.44
 6 -16 -1 76.47 7.06
 6 16 -1 86.53 10.51
 6 -16 -1 80.01 8.84
 6 16 1 75.25 10.01
 7 -16 1 2.88 1.84
 7 16 -1 -0.93 2.09
 7 -16 -1 0.83 1.42
 7 -16 -1 2.38 2.06
 7 -16 1 0.44 2.31
 7 -16 -1 -0.27 2.3
 7 16 1 -2.09 1.53
 7 -16 1 -0.68 1.51
 8 -16 1 103.68 8.54
 8 -16 -1 109.93 9.22
 8 16 -1 112.67 11.68
 8 -16 1 118.9 10.3
 8 -16 1 102.61 9.29
 8 -16 -1 90.06 7.78
 8 -16 -1 110.86 10.35
 8 16 1 100.98 10.92
 9 -16 -1 -2.78 2.58
 9 -16 -1 3.08 1.97
 9 16 1 -1.91 2.28
 9 -16 1 -1.93 1.92
 9 -16 1 1.57 2.44
 9 16 -1 2.94 2.72
 9 -16 1 0.48 1.31
 9 -16 -1 0.23 1.75
 10 -16 1 133 10.36
 10 16 1 124.89 11.87
 10 -16 -1 122.52 9.85
 10 16 -1 122.36 12.17
 10 -16 -1 122.79 8.99
 10 -16 1 147.05 9.96
 10 -16 -1 137.95 11.6
 10 -16 1 124.8 11.02
 11 -16 1 1.28 2.14
 11 16 1 2.77 2.44
 11 -16 1 -2.55 2.01
 11 -16 1 1.33 2.1
 11 16 -1 2.4 2.25
 11 -16 -1 0.8 2.01
 11 -16 -1 2.52 2.25
 11 -16 -1 0.28 1.56
 12 -16 -1 146.61 11.82
 12 -16 -1 127.46 9.57
 12 -16 1 150.72 12.43
 12 -16 1 135.02 11.25
 12 16 1 142.39 12.2
 12 16 -1 133.95 13.14
 12 -16 -1 131.1 10.11
 12 -16 1 153.28 10.81
 13 -16 1 4.54 2.69
 13 -16 -1 -1.54 2.35
 13 -16 -1 -0.38 1.27
 13 16 1 0.17 1.76
 13 -16 -1 -0.02 1.65
 13 16 -1 -4.17 2.75
 13 -16 1 1.94 2.98
 13 -16 1 -0.05 1.59
 14 16 -1 141.72 12.76
 14 -16 -1 153.97 11.22
 14 16 1 140.68 12.71
 14 -16 -1 119.25 9.52
 14 -16 1 125.66 10.86
 14 -16 1 139.74 12.07
 14 -16 1 134 11.51
 15 -16 -1 -0.8 1.79
 15 -16 -1 0.73 1.13
 15 -16 1 -4.77 3.17
 15 16 -1 -3.13 3.61
 15 16 1 -0.91 2.15
 15 -16 1 0.73 1.98
 16 -16 1 91.85 9.14
 16 -16 1 89.16 9.21
 16 16 1 86.44 10.35
 16 -16 -1 89.09 9.23
 16 -16 -1 89.09 8.2
 16 16 -1 80.12 10.71
 17 -16 1 -1.12 2.15
 17 -16 -1 1.96 1.79
 17 -16 1 -1.16 2.26
 17 16 1 -0.16 2.13
 17 -16 -1 -3.82 2.83
 17 16 -1 -1.51 1.69
 18 16 1 39.83 6.88
 18 -16 1 38.92 6.08
 18 -16 -1 46.75 6.46
 18 -16 1 35.08 6.16
 19 -16 1 3.04 2.37
 19 16 1 2.16 1.97
 19 -16 -1 -1.89 1.74
 20 -16 1 36.68 6.1
 20 16 1 22.83 5.55
 20 -16 -1 26.48 5.67
 21 16 1 1.95 1.63
 21 -16 -1 3.3 2.57
 21 -16 1 0.84 2.29
 22 16 1 62.25 9.54
 22 -16 -1 68.87 8.15
 22 -16 1 71.43 8.5
 23 -16 1 4.53 3.23
 23 16 1 2.19 2.68
 23 -16 -1 3.76 2.99
 24 -16 -1 68.77 8.69
 24 -16 1 74.34 8.81
 24 16 1 60.88 9.76
 25 -16 1 4.61 2.6
 25 -16 -1 1.82 2.33
 26 -16 -1 23.57 5.18
 26 -16 1 23.46 5.25
 27 -16 1 2.51 2.01
 27 -16 -1 -2.79 2.73
 28 -16 -1 57.85 7.74
 28 -16 1 62.43 8.55
 29 -16 1 4.75 3.12
 29 -16 -1 0.57 1.66
 30 -16 1 101.65 10.7
 30 -16 -1 99.83 9.82
 31 -16 1 -2.59 2.14
 31 -16 -1 0.56 1.48
 32 -16 1 73.62 8.9
 32 -16 -1 67.59 8.07
 33 -16 1 0.92 2.05
 33 -16 -1 -0.05 1.43
 34 -16 1 90.09 9.61
 34 -16 -1 80.98 8.57
 35 -16 1 6.31 2.78
 35 -16 -1 6.93 2.75
 36 -16 1 65.96 7.79
 36 -16 -1 60.83 7
 37 -16 -1 0.01 1.58
 37 -16 1 2.21 2.16
 38 -16 1 26.47 4.87
 38 -16 -1 23.91 4.46
 39 -16 -1 0.09 1.1
 39 -16 1 2.19 2.09
 40 -16 1 15.64 3.45
 41 -16 1 0.54 1.04
 0 -17 -1 0.69 1.74
 0 -17 1 1.48 1.79
 0 -17 1 -0.25 1.8
 0 -17 -1 -1.18 2.98
 0 17 1 -0.35 2.66
 0 17 -1 1.45 2.44
 -1 -17 1 982.42 24.88
 -1 -17 -1 1012.48 27.68
 1 -17 1 990 24.66
 -1 17 1 1033.2 36.01
 -1 -17 1 938.15 25.02
 1 17 1 1022.35 36.32
 -1 -17 -1 1091.56 27.51
 1 -17 1 993.85 25.67
 1 -17 -1 1047.87 27.08
 1 17 -1 1036.91 35.15
 1 -17 -1 1004 27.55
 -2 -17 1 -3.42 2.62
 2 -17 1 -0.36 2.28
 2 -17 -1 0.21 2.36
 -2 -17 1 -1.75 2.25
 2 -17 1 2.63 1.3
 2 17 1 0.66 2.88
 -2 17 1 1.53 2.32
 2 17 -1 2.22 2.7
 2 -17 -1 -1.93 3.38
 2 -17 1 -1.38 2.15
 -3 17 1 787.47 30.11
 3 17 1 802.7 30.8
 3 -17 -1 780.42 24.36
 -3 -17 1 690.56 21.27
 3 -17 1 783.27 22.75
 3 17 -1 813.05 31.21
 3 -17 -1 796.53 23.31
 3 -17 1 738.8 21.05
 3 -17 1 776.67 24.47
 -3 -17 1 765.48 21.89
 4 17 1 2.05 2.21
 4 17 -1 -0.91 2.71
 4 -17 -1 5.8 2.73
 4 -17 1 0.98 1.85
 4 -17 1 2.27 1.82
 -4 -17 1 1.54 1.69
 4 -17 -1 1.14 1.74
 4 -17 1 1.62 1.86
 5 -17 -1 135.78 9.47
 5 -17 1 119.65 9.47
 5 17 1 117.27 11.67
 5 -17 1 111.52 7.96
 5 17 -1 116.45 12.03
 5 -17 1 117.91 8.97
 -5 -17 1 102.35 7.99
 5 -17 -1 129.19 9.9
 6 -17 -1 0.24 1.68
 6 -17 1 1.5 2.03
 6 17 -1 4.08 3.42
 6 -17 1 4.38 2.13
 6 17 1 3.42 2.2
 6 -17 1 9.5 3.82
 6 -17 -1 4.16 1.85
 7 17 -1 38.24 6.92
 7 -17 1 40.04 5.23
 7 -17 1 42.47 5.16
 7 -17 -1 36.59 4.78
 7 -17 1 37.93 5.93
 7 -17 -1 41.95 6.69
 7 17 1 45.64 7.01
 8 -17 -1 6.08 2.85
 8 17 -1 5.48 2.82
 8 -17 1 9.1 2.73
 8 -17 1 0.03 1.61
 8 17 1 7.16 2.92
 8 -17 1 3.91 2.14
 8 -17 -1 9.41 2.93
 8 -17 -1 5.62 2.8
 9 -17 1 2.26 1.83
 9 -17 -1 6.6 2.86
 9 17 1 10.18 3.81
 9 -17 -1 3.47 1.96
 9 -17 1 0.61 1.43
 9 17 -1 6.59 3.45
 9 -17 1 5.17 2.47
 10 -17 1 3.12 3.06
 10 -17 -1 5.98 3.05
 10 -17 1 6.89 2.54
 10 -17 1 6.63 2.74
 10 17 1 9.85 3.64
 10 17 -1 5 3.37
 10 -17 -1 4.09 2.05
 10 -17 -1 6.25 2.92
 11 -17 1 74.91 7.82
 11 17 -1 80.07 9.12
 11 -17 -1 78.3 7.17
 11 17 1 74.82 8.92
 11 -17 -1 76.83 7.43
 11 -17 1 71.85 7.17
 11 -17 -1 75.92 7.88
 11 -17 1 71.24 6.77
 12 -17 -1 1.57 1.43
 12 -17 1 3.17 2.4
 12 -17 -1 5.24 2.76
 12 -17 -1 -3.91 2.58
 12 17 1 8.35 3.18
 12 -17 1 2.69 2.21
 12 -17 1 0.98 2.05
 12 17 -1 0.55 2.26
 13 -17 -1 260.89 13.38
 13 -17 1 265.78 13.82
 13 17 -1 266.08 16.74
 13 -17 -1 259.85 14.91
 13 -17 1 260.54 13.31
 13 17 1 271.72 16.64
 13 -17 -1 244.01 12.97
 13 -17 1 243.17 14.18
 14 -17 -1 7.83 2.72
 14 -17 -1 6.88 2.21
 14 -17 1 5.7 2.52
 14 17 1 6.1 3
 14 -17 1 13.79 4.11
 14 -17 1 9.08 2.93
 14 17 -1 2.62 1.86
 15 17 -1 441.6 22.04
 15 -17 -1 473.08 18.22
 15 -17 -1 441.99 17.63
 15 17 1 440.36 21.36
 15 -17 1 460.18 18.18
 15 -17 1 485.11 19.24
 16 -17 1 1.7 2.87
 16 -17 1 1.48 2.42
 16 17 1 4.76 3.16
 16 -17 -1 1.5 2.06
 17 17 1 489.56 22.84
 17 -17 1 543.5 20.91
 17 -17 1 550.93 20.04
 17 -17 -1 543.14 20.16
 18 -17 1 7.21 2.79
 18 -17 -1 2.2 1.71
 18 17 1 0.5 2.22
 19 -17 -1 271.61 14.87
 19 -17 1 273.69 15.15
 19 17 1 243.16 16.31
 20 -17 1 -0.04 2.04
 20 17 1 4.8 3.09
 20 -17 -1 -2.9 2.77
 21 17 1 94.63 10.2
 21 -17 -1 102.66 9.36
 21 -17 1 101.76 9.55
 22 17 1 7.06 3.52
 22 -17 1 3.26 2.74
 22 -17 -1 0.16 2.2
 23 -17 -1 9.32 3.64
 23 17 1 8.78 4
 23 -17 1 10.62 3.58
 24 -17 1 27.71 5.41
 24 -17 -1 20.57 4.64
 24 17 1 17.36 4.86
 25 -17 -1 8.29 3.54
 25 -17 1 2.31 2.13
 26 -17 -1 3.62 2.65
 26 -17 1 1.99 2.31
 27 -17 1 6.6 3.23
 27 -17 -1 7.85 3.26
 28 -17 1 7.3 3.15
 28 -17 -1 9.44 3.3
 29 -17 1 135.81 11.08
 29 -17 -1 129.6 10.53
 30 -17 1 7.5 2.81
 30 -17 -1 7.97 2.96
 31 -17 1 364.65 17.84
 31 -17 -1 330.31 16.62
 32 -17 -1 6.28 2.74
 32 -17 1 5.18 2.68
 33 -17 1 628.55 22.72
 33 -17 -1 592.29 21.36
 34 -17 1 -1.66 1.69
 34 -17 -1 0.86 1.44
 35 -17 1 484.62 19.67
 35 -17 -1 448.79 18.15
 36 -17 -1 1.75 1.46
 36 -17 1 7.21 2.65
 37 -17 1 138.1 10.05
 37 -17 -1 122.12 8.79
 38 -17 1 1.67 1.53
 38 -17 -1 1.69 1.58
 39 -17 1 10.89 2.87
 40 -17 1 0.05 1.24
 0 -18 -1 124.22 10.4
 0 -18 1 69.33 8.14
 0 18 1 123.03 15.65
 0 -18 -1 137.53 11.31
 0 -18 1 78.19 8.26
 1 -18 1 -2.14 2.34
 -1 18 1 -0.85 2.1
 1 -18 -1 -6.34 3.64
 -1 -18 1 -3.81 2.27
 -1 -18 1 -2.7 2.37
 1 -18 1 -0.88 2.66
 1 -18 -1 -1.72 2.01
 1 -18 1 -1.06 2.2
 -1 -18 -1 -4.33 2.77
 1 18 1 -1.83 2.64
 -2 -18 1 33.62 5.46
 2 18 -1 21.61 6.67
 -2 -18 1 35.17 5.99
 2 -18 1 36.23 6.78
 2 -18 -1 51.86 6.68
 2 -18 1 43.88 5.99
 2 18 1 50.38 10.08
 2 -18 -1 59.83 7.31
 -2 -18 -1 46.47 6.81
 2 -18 1 49.72 6.92
 -2 18 1 44.1 8.86
 3 -18 -1 5.42 2.6
 3 -18 1 2.1 1.98
 3 -18 1 5.51 3.48
 3 -18 1 4.59 2.71
 3 18 -1 2.82 2.53
 3 -18 -1 -1.16 2.29
 -3 -18 1 1.39 2.03
 3 18 1 0.61 2.72
 4 18 -1 44.38 9.36
 4 -18 1 63.96 8.22
 -4 -18 1 48.2 6.62
 4 -18 -1 53.99 7.44
 4 -18 1 60.01 7.54
 4 18 1 47.74 9.31
 4 -18 1 61.94 6.86
 4 -18 -1 50.92 6.6
 5 -18 1 6.34 2.98
 -5 -18 1 1.11 1.71
 5 -18 1 2.82 2.35
 5 -18 -1 1.97 1.59
 5 18 1 -2.01 3.27
 5 -18 1 0.36 1.71
 5 -18 -1 1.5 2.17
 5 18 -1 -5.94 4.23
 6 -18 1 71.84 7.42
 6 -18 1 68.68 7.93
 6 -18 1 67.6 8.48
 6 -18 -1 66.37 7.65
 6 -18 -1 70.16 8.75
 6 18 -1 79.38 11.59
 6 18 1 71.6 10.74
 7 18 -1 -2.45 2.79
 7 18 1 -1.57 2.41
 7 -18 -1 -2.12 2.38
 7 -18 1 -2.52 1.32
 7 -18 1 0.52 1.97
 7 -18 -1 -1.72 2.14
 7 -18 1 -2.08 1.83
 8 -18 1 95.44 10.59
 8 -18 1 92.95 8.34
 8 -18 -1 87.98 9.75
 8 -18 1 81.63 8.61
 8 18 -1 101.99 12.34
 8 -18 -1 87.26 8.48
 8 18 1 90.24 11.61
 9 -18 -1 2.83 2.47
 9 18 -1 4.88 3.75
 9 -18 1 1.29 2.8
 9 -18 1 -0.65 2.13
 9 -18 -1 -2.26 2.57
 9 18 1 -2.73 3.01
 9 -18 1 1.69 1.53
 10 18 -1 111.03 12.72
 10 -18 -1 116.16 11.3
 10 -18 1 109.71 9.34
 10 -18 1 106.02 9.99
 10 18 1 107.92 12.38
 10 -18 1 87.07 11.29
 10 -18 -1 116.04 10.01
 11 18 1 -3.65 3.59
 11 -18 1 -0.1 1.76
 11 -18 -1 0.01 1.66
 11 -18 1 3.47 3.1
 11 -18 -1 0.07 2.31
 11 18 -1 -0.04 1.87
 11 -18 1 -2.16 2.51
 11 -18 -1 -2.31 1.61
 12 -18 1 40.51 6.02
 12 18 -1 43.19 8.71
 12 -18 1 40.44 6.47
 12 -18 -1 31.8 5.25
 12 18 1 38.14 7.43
 12 -18 -1 29.45 5.25
 12 -18 1 38.01 5.95
 12 -18 -1 36.91 6.6
 13 -18 1 -2.77 2.59
 13 18 1 -3.12 3.42
 13 -18 1 6.19 2.76
 13 -18 -1 1.3 1.9
 13 18 -1 1.42 3.06
 13 -18 -1 1.09 1.14
 13 -18 -1 -0.57 2.8
 13 -18 1 -0.7 2.86
 14 -18 1 16.75 4.26
 14 -18 -1 15.8 3.7
 14 18 1 24.2 5.96
 14 -18 1 14.35 3.96
 14 -18 1 22.52 4.43
 15 -18 1 -1.15 1.95
 15 -18 -1 -1.27 1.77
 15 -18 1 -1.99 2.08
 15 18 1 -1.69 1.66
 16 -18 1 45.08 7.23
 16 -18 1 46.85 6.44
 16 18 1 47.86 8.08
 16 -18 -1 50.27 6.95
 17 18 1 0.46 1.84
 17 -18 -1 -0.92 2.14
 17 -18 1 -1.48 1.89
 18 -18 1 18.46 4.73
 18 18 1 15.66 5.04
 18 -18 -1 18.16 4.61
 19 -18 -1 1.5 2.27
 19 18 1 -1.59 2.71
 19 -18 1 0.83 2.62
 20 -18 -1 11.73 3.79
 20 18 1 14.08 4.65
 20 -18 1 4.8 2.44
 21 -18 -1 1.4 2.02
 21 -18 1 6.9 3.46
 21 18 1 2.3 3.45
 22 18 1 22.19 6.22
 22 -18 1 23.42 4.67
 22 -18 -1 22.91 4.9
 23 18 1 -0.02 2.05
 23 -18 1 1.3 1.72
 23 -18 -1 -3.5 2.2
 24 -18 1 27.07 5.8
 24 -18 -1 13.55 3.83
 25 -18 1 -0.71 2.11
 25 -18 -1 -2.31 2.37
 26 -18 -1 26.58 5.42
 26 -18 1 31.87 6.09
 27 -18 1 3.94 2.62
 27 -18 -1 2.46 2.35
 28 -18 1 50.04 7.2
 28 -18 -1 40.81 6.28
 29 -18 -1 1.57 1.49
 29 -18 1 -1.6 2.12
 30 -18 1 22.72 5.21
 30 -18 -1 20.53 4.65
 31 -18 1 5.9 3.07
 31 -18 -1 -0.41 1.8
 32 -18 -1 41.17 6.09
 32 -18 1 51.99 7.52
 33 -18 -1 1.42 1.38
 33 -18 1 -0.1 1.7
 34 -18 1 55.61 7.34
 34 -18 -1 45.99 5.96
 35 -18 -1 1.73 1.83
 35 -18 1 0.88 1.53
 36 -18 -1 18.97 3.85
 36 -18 1 19.3 4.22
 37 -18 1 -5.34 2.16
 37 -18 -1 0.34 1
 38 -18 1 7.73 2.48
 38 -18 -1 7.57 2.41
 39 -18 1 -2.37 1.54
 0 19 1 -1.06 2.41
 0 -19 1 0.77 1.96
 0 -19 1 -1.99 1.97
 0 -19 -1 -3.66 2.74
 0 -19 1 1.03 2.76
 0 -19 -1 0.33 3.37
 -1 -19 1 736.27 22.39
 1 -19 1 725.6 22.36
 -1 19 1 733.99 33.11
 -1 -19 -1 765.15 26.06
 1 -19 1 751.02 23.8
 1 -19 -1 744.65 23.56
 1 -19 1 743.9 25.63
 1 -19 -1 750.41 25.85
 -1 -19 1 746.57 23.43
 1 19 1 786.24 35.36
 2 -19 1 4.92 1.96
 2 -19 1 4.6 1.75
 -2 -19 -1 -1.27 2.56
 2 -19 -1 5.36 2.49
 2 -19 -1 2.43 2.08
 -2 -19 1 4.43 2.79
 2 -19 1 4.19 2.64
 2 19 1 -2.12 2.49
 3 -19 1 168.09 11.17
 3 -19 -1 176.78 12.61
 3 -19 1 171.94 10.68
 -3 -19 -1 166.49 11.92
 3 19 1 186.96 17.36
 -3 -19 1 165 11.04
 3 -19 -1 162.23 10.9
 3 -19 1 167.06 12.01
 4 19 1 2.53 2.66
 4 -19 1 1.77 1.92
 4 -19 1 3.83 3.05
 4 -19 -1 4.85 3.31
 4 -19 -1 3.35 1.99
 4 -19 1 6.13 2.65
 5 -19 -1 7.33 3.77
 5 -19 1 6.33 2.99
 5 19 1 2 2.98
 5 -19 -1 -0.84 1.95
 -5 -19 1 4.13 2.55
 5 -19 1 0.65 2.14
 5 -19 1 0.66 2.23
 6 -19 1 7.98 3.18
 6 19 1 7.96 4.18
 6 -19 -1 4.79 2.53
 6 19 -1 4.25 2.97
 6 -19 1 2.88 1.98
 6 -19 1 3.93 2.09
 6 -19 -1 1.39 2.33
 7 -19 -1 154.5 12.2
 7 -19 1 140.56 11.63
 7 -19 -1 136.34 9.89
 7 -19 1 146.11 9.78
 7 19 -1 156.53 15.28
 7 19 1 150.22 14.19
 7 -19 1 139.07 10.38
 8 -19 1 -1.65 2.61
 8 -19 -1 0.88 2.79
 8 -19 -1 0.85 1.67
 8 19 -1 1.52 2.21
 8 -19 1 -1.27 1.68
 8 19 1 4.3 2.66
 8 -19 1 -0.16 2.19
 9 -19 1 40.29 6.83
 9 -19 1 39.12 5.57
 9 -19 -1 48.12 6.07
 9 19 1 53.68 8.66
 9 19 -1 48.59 8.36
 9 -19 1 48.09 5.98
 9 -19 -1 51.42 7.5
 10 -19 1 -0.9 2.83
 10 -19 -1 -1.5 2.73
 10 -19 1 4.22 2.26
 10 -19 -1 2.85 1.76
 10 19 1 1.92 2.39
 10 -19 1 -0.66 1.76
 11 19 1 0.67 2.47
 11 -19 1 9.05 3.55
 11 -19 1 2.63 3.11
 11 -19 1 6.06 2.8
 11 -19 -1 3.25 2.74
 11 -19 -1 2.95 1.49
 12 -19 1 2.42 2.32
 12 -19 -1 5.3 3.73
 12 -19 1 6.23 2.83
 12 -19 -1 3.73 2.42
 12 19 1 -1.04 2.93
 12 -19 1 6.14 3.31
 13 -19 -1 5.97 3.29
 13 -19 1 5.36 2.8
 13 -19 1 4.8 2.69
 13 -19 1 10.06 3.27
 13 -19 -1 6.92 2.65
 13 19 1 6.56 4.13
 14 19 1 9.83 3.58
 14 -19 -1 15 3.98
 14 -19 1 10.92 4.37
 14 -19 1 12.92 3.86
 14 -19 1 16.35 4.18
 15 -19 -1 164.3 11.27
 15 19 1 166.74 14.37
 15 -19 1 165.36 11.34
 16 -19 -1 -0.14 1.78
 16 -19 1 3.6 2.58
 16 19 1 1.53 1.94
 17 -19 1 116.2 9.85
 17 19 1 116.91 12.22
 17 -19 -1 118.71 9.76
 18 -19 -1 2.78 2.22
 18 19 1 5.29 3.02
 18 -19 1 8.43 3.05
 19 -19 -1 149.67 11.16
 19 -19 1 152.3 11.35
 19 19 1 133.39 13.1
 20 -19 1 10.41 3.39
 20 -19 -1 3.87 2.49
 20 19 1 8.72 3.97
 21 -19 -1 10.57 3.37
 21 -19 1 7.6 3.26
 21 19 1 4.94 2.95
 22 -19 1 5.75 2.73
 22 -19 -1 7.77 3.34
 23 -19 1 11.1 3.78
 23 -19 -1 7.51 2.8
 24 -19 1 2 2.1
 24 -19 -1 2.64 2.64
 25 -19 1 205.6 13.44
 25 -19 -1 204.13 12.99
 26 -19 -1 2.75 2.45
 26 -19 1 6.17 2.56
 27 -19 -1 35.64 5.56
 27 -19 1 47.2 6.66
 28 -19 1 4.22 2.72
 28 -19 -1 7.08 2.73
 29 -19 -1 1.13 2
 29 -19 1 4.72 2.65
 30 -19 -1 11.12 3.3
 30 -19 1 9.09 3.35
 31 -19 1 104.51 9.49
 31 -19 -1 90.34 8.61
 32 -19 1 7.39 2.81
 32 -19 -1 3.03 2.12
 33 -19 1 248.66 13.84
 33 -19 -1 240.31 12.9
 34 -19 -1 1.15 1.49
 34 -19 1 -1.35 2.08
 35 -19 1 170.07 10.81
 35 -19 -1 137.8 9.4
 36 -19 1 2.6 1.9
 36 -19 -1 0.28 1.36
 37 -19 1 40.06 4.88
 37 -19 -1 29.37 4.18
 38 -19 1 -2.76 1.58
 0 -20 1 71.56 9.04
 0 -20 1 78.23 8.19
 -1 -20 -1 -0.53 2.6
 1 -20 1 -3.78 2.67
 1 -20 1 0.97 1.86
 1 -20 1 -2.89 2.64
 1 -20 -1 -1.73 2.59
 1 -20 -1 1.49 2.16
 1 20 1 2.42 3.71
 -1 -20 1 -1.32 2.17
 -1 -20 1 -2.5 2.13
 2 -20 -1 11.82 3.81
 2 20 1 8.16 4.81
 2 -20 1 14.38 4.36
 2 -20 -1 16.13 3.87
 -2 -20 1 21.73 4.83
 2 -20 1 24.98 5.04
 2 -20 1 18.24 4.4
 -2 -20 -1 20.49 5.46
 3 -20 1 1.14 1.8
 -3 -20 -1 3.09 1.97
 3 20 1 3.01 4.18
 3 -20 1 -0.92 2.33
 3 -20 -1 -0.69 2.28
 3 -20 -1 -0.07 2.2
 3 -20 1 0.89 2.08
 -3 -20 1 2.25 2.55
 4 -20 1 0.32 1.68
 -4 -20 -1 1.27 2.09
 4 -20 -1 2.88 2.32
 4 20 1 -2.28 4.05
 4 -20 1 2.73 2.49
 4 -20 -1 -1.85 2.15
 4 -20 1 -1.94 2.85
 5 -20 -1 5.37 2.97
 5 -20 -1 2.13 2.36
 5 20 1 -0.2 2.65
 5 -20 1 1.26 2.48
 5 -20 1 1.32 1.63
 5 -20 1 -1.27 2.4
 6 -20 -1 0.25 1.82
 6 -20 1 1.29 1.97
 6 -20 -1 4.55 3.73
 6 20 1 2.69 4.18
 6 -20 1 5.79 2.62
 7 -20 1 4.8 2.82
 7 -20 1 -1.72 1.97
 7 -20 1 4.09 3.37
 7 -20 -1 -1.01 2.11
 7 20 1 0.36 3.53
 7 -20 -1 -0.23 2.55
 8 20 1 19.35 6.28
 8 -20 1 16.76 4.51
 8 -20 -1 12.2 3.7
 8 -20 1 13.22 5.01
 8 -20 -1 16.77 5.02
 8 -20 1 20.46 4.5
 9 -20 -1 0.68 1.75
 9 -20 1 -2.57 1.8
 9 -20 -1 2.52 2.85
 9 20 1 -4.24 3.6
 9 -20 1 -0.86 1.92
 9 -20 1 1.84 2.94
 10 -20 -1 2.68 2.67
 10 -20 -1 5.22 2.94
 10 -20 1 7.15 3.57
 10 -20 1 7.23 3.43
 10 -20 1 5.1 2.74
 10 20 1 4.71 3.01
 11 -20 1 -1.59 2.83
 11 -20 1 2.62 2.05
 11 -20 -1 1.48 1.48
 11 -20 -1 -2.16 3.04
 11 20 1 -3.28 2.77
 11 -20 1 -3.01 2.07
 12 -20 1 8.04 3.83
 12 -20 -1 0.37 1.9
 12 20 1 -0.1 2.21
 12 -20 -1 -1.33 2.65
 12 -20 1 3.47 2.49
 12 -20 1 4.59 2.73
 13 -20 -1 3.21 2.38
 13 -20 1 5.82 3.41
 13 -20 1 4.7 2.32
 13 20 1 1.08 2.29
 14 -20 -1 1.96 1.95
 14 20 1 1.45 2
 14 -20 1 -2.61 2.45
 14 -20 1 2.81 2.49
 15 -20 1 0.38 1.82
 15 20 1 -0.46 1.87
 16 -20 1 16.53 4.11
 16 -20 -1 16.53 4.22
 16 20 1 8.74 4.37
 17 -20 1 1.92 1.55
 17 20 1 5.41 5.03
 17 -20 -1 0.98 1.81
 18 20 1 2.61 2.14
 18 -20 -1 0.61 1.53
 19 20 1 1.39 2.55
 19 -20 1 1.5 2.21
 19 -20 -1 5.29 2.84
 20 -20 1 17.01 4.14
 20 -20 -1 17.63 4.24
 21 -20 1 5.9 3.17
 21 -20 -1 0.32 1.8
 22 -20 1 7.14 3.45
 22 -20 -1 5.65 2.78
 23 -20 -1 -1.46 1.94
 23 -20 1 3.21 2.55
 24 -20 1 10.51 3.67
 24 -20 -1 5.17 2.43
 25 -20 -1 0.54 2.29
 25 -20 1 -0.07 1.63
 26 -20 -1 9.77 3.07
 26 -20 1 14.84 3.85
 27 -20 1 -1.48 1.84
 27 -20 -1 -1.46 1.45
 28 -20 1 6.11 3.08
 28 -20 -1 -0.29 2.34
 29 -20 -1 -0.32 1.38
 29 -20 1 3.74 2.61
 30 -20 1 5.99 2.76
 30 -20 -1 2.39 2.07
 31 -20 -1 -0.66 1.4
 31 -20 1 6.22 2.65
 32 -20 1 9 3.07
 32 -20 -1 8.79 2.99
 33 -20 1 -1.9 1.78
 33 -20 -1 1.31 1.18
 34 -20 1 4.45 2.66
 34 -20 -1 2.89 1.98
 35 -20 -1 -0.86 0.96
 35 -20 1 0.98 1.84
 36 -20 1 1.76 1.78
 37 -20 1 1.33 1.08
 0 -21 1 -3.94 3.33
 0 -21 -1 -5.39 3.58
 0 -21 1 -0.18 2.27
 -1 -21 1 203.57 14.16
 -1 -21 -1 214.18 14.43
 1 -21 1 214.93 14.24
 1 -21 -1 208.87 14.65
 1 -21 1 204.6 13.22
 1 -21 1 196.04 12.6
 -2 -21 -1 -7.37 3.7
 2 -21 -1 3.47 2.63
 2 21 1 5.25 5.09
 2 -21 1 -2.03 1.96
 2 -21 -1 3.26 2.33
 2 -21 1 5.65 2.96
 2 -21 1 6.72 3.7
 -2 -21 1 2.66 2.52
 3 -21 1 1.35 2.02
 3 -21 1 7.35 3.34
 3 -21 1 9.83 4.32
 3 21 1 5.14 2.91
 3 -21 -1 7.77 3.12
 3 -21 -1 3.17 2.86
 -3 -21 -1 10.86 4.34
 4 -21 1 2.04 2.28
 4 21 1 6.92 5.34
 4 -21 -1 6.6 4.13
 4 -21 1 6 3.69
 4 -21 1 -3.38 2.37
 4 -21 -1 11.27 4.22
 -4 -21 -1 5.51 3.66
 5 -21 -1 83.03 8.2
 5 -21 1 91.51 8.97
 5 -21 1 91.4 8.2
 5 -21 1 83.18 9.12
 -5 -21 -1 89.33 9.13
 5 21 1 82.83 12.71
 5 -21 -1 89.88 9.8
 6 21 1 -5.23 4.41
 6 -21 -1 0.71 3.69
 6 -21 1 -0.69 3.92
 6 -21 -1 7.35 3.12
 -6 -21 -1 2.4 3.16
 6 -21 1 -1.62 2.55
 6 -21 1 1.62 2.05
 7 -21 -1 298.19 15.37
 7 -21 1 360.33 17.6
 7 -21 1 343.9 18.8
 7 -21 1 326.75 15.55
 7 -21 -1 335.41 18.74
 7 21 1 325.82 24.37
 8 -21 1 -3.01 3.78
 8 21 1 -0.81 3.01
 8 -21 1 -3.45 2.72
 8 -21 -1 1.53 2.19
 8 -21 -1 7.5 3.2
 8 -21 1 1.63 2.88
 9 -21 -1 177.54 12.14
 9 -21 -1 202.68 14.85
 9 -21 1 221.5 15.2
 9 -21 1 206.67 12.55
 9 21 1 187.1 18.34
 10 21 1 4.64 5.76
 10 -21 -1 0.95 2.68
 10 -21 1 -0.51 3.45
 10 -21 1 8.2 2.98
 10 -21 -1 6.55 2.81
 11 -21 -1 61.69 7.15
 11 -21 1 64.23 8.04
 11 21 1 57.27 9.64
 11 -21 1 63.01 7.15
 11 -21 -1 66.63 8.41
 12 -21 1 3.63 3.24
 12 -21 -1 5.43 2.83
 12 -21 1 4.24 2.75
 12 -21 -1 0.65 3.2
 12 21 1 1.45 2.27
 13 -21 1 -2.47 2.16
 13 -21 -1 2.93 1.99
 13 21 1 6.13 3.35
 13 -21 1 -1.4 3.01
 14 21 1 0.29 2.37
 14 -21 1 3.57 2.2
 14 -21 1 6.71 4.06
 14 -21 -1 5.29 2.74
 15 21 1 18.08 5.12
 15 -21 -1 23.09 4.77
 15 -21 1 17 4.33
 16 -21 -1 -1.4 2.04
 16 21 1 2.18 3.6
 16 -21 1 -0.64 2.06
 17 -21 -1 43.11 6.21
 17 21 1 42.88 8.45
 17 -21 1 40.51 6.1
 18 -21 1 9.76 3.43
 18 -21 -1 5.4 2.99
 19 -21 1 7.02 2.96
 19 -21 -1 1.04 1.67
 20 -21 1 17.61 4.39
 20 -21 -1 12.57 4.04
 21 -21 1 3.38 2.73
 21 -21 -1 1.49 2.2
 22 -21 1 8.98 3.71
 22 -21 -1 3.64 2.36
 23 -21 -1 78.63 8.24
 23 -21 1 73.72 8.26
 24 -21 1 -0.3 1.64
 24 -21 -1 -3.23 2.87
 25 -21 -1 174.09 12.16
 25 -21 1 195.93 13.04
 26 -21 -1 -2.51 2.45
 26 -21 1 -2.09 2.42
 27 -21 -1 199.63 12.5
 27 -21 1 203.47 13.21
 28 -21 1 4.42 2.89
 28 -21 -1 2.57 1.77
 29 -21 1 36.88 5.53
 29 -21 -1 27.6 4.82
 30 -21 1 6.08 2.66
 30 -21 -1 8.62 3.01
 31 -21 1 5.38 2.33
 31 -21 -1 4.42 2.31
 32 -21 1 4.46 2.26
 32 -21 -1 -1.62 1.65
 33 -21 1 50.29 6.04
 33 -21 -1 41.11 4.95
 34 -21 -1 3.2 1.57
 34 -21 1 1.41 1.73
 35 -21 1 54.73 5.75
 36 -21 1 2.53 1.38
 0 -22 -1 8.62 4.15
 0 -22 1 4.5 3.66
 1 -22 1 -0.9 2.24
 1 -22 -1 -2.4 2.42
 -1 -22 -1 5.48 3.19
 -1 -22 1 -0.6 2.89
 2 -22 1 14.09 4.2
 -2 -22 -1 6.28 3.52
 -2 -22 1 17.79 5.5
 2 -22 1 15.96 5.41
 2 -22 -1 15.41 5.55
 -3 -22 -1 -0.64 2.58
 3 -22 1 0.21 2.55
 -3 -22 1 0.53 3.11
 3 -22 1 -0.98 1.83
 3 -22 -1 2.97 3.52
 4 -22 -1 21.84 5.98
 4 -22 -1 14.46 4.09
 -4 -22 1 15.88 5
 4 -22 1 13.79 4.72
 -4 -22 -1 18.65 5.21
 4 -22 1 14.21 3.91
 4 22 1 8.19 5.39
 5 22 1 0.6 2.87
 5 -22 -1 -0.24 2.21
 5 -22 1 -1.76 3.31
 -5 -22 -1 -5.18 3.75
 5 -22 1 -2.35 2.35
 5 -22 -1 -2.24 2.9
 6 -22 1 32.64 5.51
 6 22 1 23.7 8.52
 6 -22 -1 45.32 8.06
 6 -22 1 53.91 8.46
 -6 -22 -1 33.44 6.2
 6 -22 -1 30.8 5.62
 7 22 1 -1.02 4.54
 7 -22 -1 0.39 2
 7 -22 -1 -4.42 3.74
 -7 -22 -1 2.99 2.46
 7 -22 1 -0.06 3.23
 -8 -22 -1 25.6 6.53
 8 -22 -1 31.06 5.36
 8 -22 1 31.6 6.76
 8 22 1 20.54 8.47
 8 -22 -1 37.87 7.23
 9 -22 -1 -0.9 1.88
 9 -22 1 2.97 2.74
 9 -22 -1 -3.85 3.39
 9 -22 1 -2.72 3.23
 9 22 1 6.49 4.86
 10 -22 1 20.15 5.67
 10 -22 -1 19.39 4.35
 10 -22 -1 21.37 6.19
 10 22 1 31.64 8.5
 10 -22 1 17.96 4.59
 11 -22 1 0.68 2.89
 11 -22 -1 2.39 3.51
 11 -22 -1 1.45 2.29
 11 -22 1 1.82 2.63
 11 22 1 -0.93 3.22
 12 -22 -1 13.67 5.06
 12 22 1 7.68 5.28
 12 -22 1 7.3 2.92
 12 -22 -1 13.7 4.32
 12 -22 1 2.36 2.5
 13 -22 1 1.52 1.66
 13 -22 1 1.43 3.44
 13 22 1 2.01 3.41
 13 -22 -1 -1.08 1.76
 14 -22 -1 43.25 6.55
 14 22 1 27.07 7.83
 14 -22 1 32.44 5.89
 15 -22 1 0.07 2.65
 15 22 1 -5.54 3.86
 16 -22 -1 26.63 5.41
 16 -22 1 37.69 6.28
 17 -22 -1 -0.61 1.66
 17 -22 1 5.53 2.66
 18 -22 1 3.51 2.55
 18 -22 -1 -2.39 2.16
 19 -22 1 1.21 1.9
 19 -22 -1 4.25 2.8
 20 -22 -1 6.58 2.93
 20 -22 1 6.18 3.08
 21 -22 -1 0.76 1.83
 21 -22 1 0.19 1.54
 22 -22 1 10 3.41
 22 -22 -1 9.07 3.14
 23 -22 -1 -2.03 2.24
 23 -22 1 -2.12 2.64
 24 -22 1 14.73 4.14
 24 -22 -1 18.44 4.11
 25 -22 -1 0.63 1.65
 25 -22 1 -2.84 2.59
 26 -22 1 29.92 5.78
 26 -22 -1 27.61 5.12
 27 -22 1 -1.65 2.07
 27 -22 -1 0.86 1.91
 28 -22 1 13.22 3.77
 28 -22 -1 16.59 3.86
 29 -22 -1 2.56 1.62
 29 -22 1 2.31 1.95
 30 -22 -1 5.95 2.49
 30 -22 1 8.52 3.16
 31 -22 -1 12.49 3.13
 31 -22 1 3.93 2.37
 32 -22 -1 7.89 2.69
 32 -22 1 11.18 3.07
 33 -22 1 -0.06 1.27
 33 -22 -1 0.84 1.29
 34 -22 1 2.96 1.81
 35 -22 1 0.35 0.96
 0 -23 -1 -9.67 3.81
 0 -23 1 -3.61 3.45
 1 -23 -1 42.49 7.01
 -1 -23 -1 42.21 7.19
 -1 -23 1 44.6 6.91
 1 -23 1 38.29 6.73
 -2 -23 1 -1.87 2.16
 2 -23 -1 1.98 2.82
 2 -23 1 1.45 2.12
 3 -23 1 3.32 3.04
 -3 -23 1 8.07 3.77
 -3 -23 -1 3.37 2.3
 3 -23 -1 7.02 3.82
 3 -23 1 3.95 3.05
 -4 -23 -1 4.93 4.91
 4 -23 -1 3.14 3.7
 -4 -23 1 2.68 3.02
 4 -23 1 0.92 2.88
 4 -23 1 -1.04 3.51
 -5 -23 1 184 13.78
 5 -23 1 189.76 14.84
 -5 -23 -1 186.95 13.61
 5 -23 -1 174.84 11.91
 5 -23 1 165.27 11.61
 5 -23 -1 201.76 15.24
 6 -23 -1 -3.03 3.55
 -6 -23 1 2.34 3.78
 6 -23 -1 0.74 3.26
 6 23 1 -1.18 4.08
 6 -23 1 3.46 4.57
 -6 -23 -1 -2.92 2.83
 6 -23 1 0.27 3.58
 7 -23 1 390.47 17.52
 -7 -23 -1 386.16 19.84
 7 -23 -1 360.71 17.41
 7 -23 1 422.64 21.46
 7 -23 -1 419.88 21.79
 8 -23 -1 2.65 3.52
 8 23 1 2.78 2.98
 -8 -23 -1 -3.72 3.71
 8 -23 1 3.86 4.16
 8 -23 -1 -1.66 3.03
 8 -23 1 2.18 3.21
 9 -23 -1 365.61 20.17
 9 23 1 299.91 25.99
 9 -23 1 325.11 16.09
 9 -23 -1 344.76 16.96
 9 -23 1 351.12 19.99
 -9 -23 -1 374.49 19.19
 10 23 1 -4.56 4.07
 10 -23 1 4.42 2.53
 10 -23 -1 7.42 5.25
 10 -23 -1 -0.79 2.85
 -10 -23 -1 6.22 5.37
 10 -23 1 -3.53 2.53
 11 -23 1 122.95 10.1
 11 -23 -1 141.71 13.1
 11 -23 -1 118.93 10.08
 -11 -23 -1 150.12 12.33
 11 23 1 108.59 14.75
 11 -23 1 107.71 11.12
 12 -23 1 4 2.99
 12 23 1 3.44 2.5
 12 -23 -1 5.54 3.21
 12 -23 1 2.29 2.18
 13 -23 1 30.57 6.36
 13 -23 -1 28.81 5.32
 13 -23 1 36.42 5.52
 14 -23 1 1.82 1.89
 14 -23 -1 5.97 3
 15 -23 1 7.33 2.47
 15 -23 -1 11.84 3.86
 16 -23 1 1.93 2
 16 -23 -1 5.26 2.41
 17 -23 1 5.21 2.51
 17 -23 -1 6.98 2.55
 18 -23 1 -3.74 2.35
 18 -23 -1 -1.74 2.24
 19 -23 -1 9.51 3.01
 19 -23 1 3.99 1.83
 20 -23 1 1.72 2.15
 20 -23 -1 3.61 2.83
 21 -23 -1 32.48 5.36
 21 -23 1 34.7 5.57
 22 -23 -1 3.78 1.94
 22 -23 1 5.41 2.23
 23 -23 1 143 10.84
 23 -23 -1 122.67 10.18
 24 -23 1 -1.5 1.76
 24 -23 -1 -1.97 2.39
 25 -23 -1 212.03 12.91
 25 -23 1 269.73 14.67
 26 -23 1 -0.67 1.8
 26 -23 -1 1.72 1.7
 27 -23 -1 197.16 11.98
 27 -23 1 218.34 13.09
 28 -23 1 0.44 1.92
 28 -23 -1 -0.3 1.56
 29 -23 1 85.56 8.02
 29 -23 -1 66.08 6.56
 30 -23 -1 0.53 1.32
 30 -23 1 3.01 2.09
 31 -23 1 6.49 2.57
 31 -23 -1 2.78 1.29
 32 -23 -1 4.38 1.62
 32 -23 1 2.4 1.74
 33 -23 1 8.92 2.39
 34 -23 1 1.67 1.25
 0 -24 -1 24.2 6.06
 0 -24 1 23.92 5.81
 1 -24 1 -6.02 3.57
 -1 -24 1 -2.83 3.03
 1 -24 -1 1.94 2.61
 -1 -24 -1 -1.72 2.38
 2 -24 1 19.28 5.78
 -2 -24 1 25.49 5.43
 2 -24 -1 21.94 5.6
 -2 -24 -1 32.42 6.89
 -3 -24 -1 -0.2 3.51
 3 -24 -1 -2.31 3.06
 -3 -24 1 2.21 2.58
 3 -24 1 1.85 2.45
 -4 -24 1 35.78 6.66
 4 -24 -1 32.32 6.79
 -4 -24 -1 29.14 6
 4 -24 1 23.09 6.52
 5 -24 1 1.34 2.68
 -5 -24 -1 -0.9 4.33
 5 -24 -1 3.03 3.03
 -5 -24 1 4.61 2.96
 5 -24 1 0.71 2.61
 6 -24 -1 97.08 11.3
 -6 -24 1 88.63 10.41
 6 -24 1 64.7 7.79
 -6 -24 -1 86.91 10.41
 6 -24 1 78.09 10.07
 7 -24 1 -2.52 2.33
 7 -24 1 -4.84 3.16
 7 -24 -1 1.63 3.1
 7 -24 -1 3.37 2.87
 -7 -24 1 -1.06 3.14
 8 -24 -1 84.88 11
 8 -24 1 99.74 11.44
 -8 -24 -1 102.26 11.1
 -8 -24 1 103 11.05
 8 -24 1 91.02 9.16
 8 -24 -1 94.44 9.32
 9 -24 1 6.66 3.25
 9 -24 -1 -5.26 3.43
 9 -24 -1 6.87 4.71
 -9 -24 -1 6.75 4.99
 9 -24 1 -2.68 2.74
 10 -24 -1 76.85 10.18
 10 -24 1 71.15 9.83
 10 -24 -1 70.64 8
 -10 -24 -1 86.22 10.37
 10 -24 1 65.17 7.82
 11 -24 1 6.44 4.34
 -11 -24 -1 7.84 5.01
 11 -24 1 3.25 2.99
 11 -24 -1 7.53 4.64
 12 -24 1 114.23 10.17
 12 -24 -1 92.42 9.18
 12 -24 1 105.36 11.39
 -12 -24 -1 117.01 11.42
 -13 -24 -1 13.1 5.04
 13 -24 1 7.07 3.71
 13 -24 -1 9.51 4.49
 14 -24 -1 37.02 6.03
 -14 -24 -1 38.25 6.64
 14 -24 1 39.81 6.14
 15 -24 -1 1.77 2.54
 15 -24 1 1.25 2.79
 -15 -24 -1 4.65 3.07
 16 -24 1 22.28 4.81
 16 -24 -1 13.2 3.68
 17 -24 -1 2.54 2.67
 17 -24 1 3.32 3.17
 18 -24 1 90.12 9.37
 18 -24 -1 74.39 8.31
 19 -24 -1 4.01 3.59
 19 -24 1 4.29 3.56
 20 -24 1 72.96 8.4
 20 -24 -1 52.1 6.83
 21 -24 -1 3.75 2.78
 21 -24 1 0.58 1.56
 22 -24 1 18.75 4.58
 22 -24 -1 19.23 4.34
 23 -24 1 0.79 1.43
 23 -24 -1 -0.12 1.77
 24 -24 -1 19.87 4.24
 24 -24 1 22.78 4.64
 25 -24 -1 0.75 1.61
 25 -24 1 -0.33 1.86
 -26 -24 -1 36.99 6.09
 26 -24 -1 31.06 4.89
 26 -24 1 36.53 5.63
 27 -24 -1 1.67 2.18
 27 -24 1 5.78 2.59
 28 -24 -1 36.4 5.17
 28 -24 1 48.59 6.19
 29 -24 -1 1.01 1.9
 29 -24 1 4.78 2.2
 30 -24 -1 22.1 3.7
 30 -24 1 31.47 4.62
 31 -24 1 4.14 1.89
 32 -24 1 12.7 2.88
 0 -25 1 -3.06 2.55
 0 -25 -1 -5.9 4.49
 -1 -25 -1 18.37 5.17
 1 -25 -1 28.15 5.92
 -1 -25 1 24.77 5.06
 1 -25 1 18.42 5.4
 2 -25 -1 -2.09 2.26
 2 -25 1 -3.46 2.56
 -2 -25 -1 5.88 3.45
 -2 -25 1 -0.1 2.58
 3 -25 -1 2.49 3.3
 -3 -25 1 7.15 3.19
 -4 -25 1 -4.57 2.96
 4 -25 -1 0.02 2.64
 5 -25 -1 138.51 12.8
 -5 -25 1 160.71 13.16
 5 -25 1 160.23 14.98
 6 -25 -1 2.06 4.27
 6 -25 1 -4.76 3.49
 -6 -25 1 15.24 6.52
 -6 -25 -1 7.94 5.89
 6 -25 1 3.91 5.34
 7 -25 1 323.02 15.9
 7 -25 1 359.57 20.3
 7 -25 -1 349.44 20.07
 -7 -25 -1 358.26 19.05
 -8 -25 1 5.07 6.58
 8 -25 1 13.07 4.95
 8 -25 1 -5.48 4.1
 8 -25 -1 -6.92 5.53
 -8 -25 -1 7.71 6.21
 -9 -25 -1 268.58 16.39
 9 -25 1 268.1 14.53
 9 -25 1 265.81 17.27
 9 -25 -1 264.43 17.41
 9 -25 -1 248.38 14.16
 10 -25 -1 1.14 2.65
 10 -25 1 -2.68 3.18
 -10 -25 -1 0.78 4.76
 -10 -25 1 3.95 5.42
 10 -25 1 12.18 4.94
 -11 -25 -1 179.02 13.3
 11 -25 1 167.91 11.65
 11 -25 1 138.82 12.71
 11 -25 -1 151.67 11.15
 -11 -25 1 152.68 12.78
 12 -25 -1 6.83 3.16
 12 -25 1 3.29 3.54
 -12 -25 -1 3.9 2.38
 -13 -25 -1 14.26 4.43
 13 -25 1 10.8 3.66
 13 -25 -1 13.24 3.63
 14 -25 -1 0.44 2.14
 -14 -25 -1 2.19 2.21
 14 -25 1 3.13 2.35
 15 -25 1 5.24 2.84
 -15 -25 -1 1.87 2.62
 15 -25 -1 4.9 2.61
 -16 -25 -1 1.76 1.86
 16 -25 -1 0.59 2.04
 16 -25 1 1.92 2.23
 17 -25 -1 9.38 3.04
 -17 -25 -1 16.49 4.55
 17 -25 1 9.42 3.16
 18 -25 1 1.6 2.05
 18 -25 -1 3.03 2.26
 -18 -25 -1 -3.87 2.54
 19 -25 -1 5.7 2.69
 19 -25 1 4.85 2.7
 -19 -25 -1 5.69 2.06
 20 -25 -1 2.06 2.06
 20 -25 1 -2.71 2
 -20 -25 -1 -1.33 2.48
 21 -25 1 32.58 5.2
 -21 -25 -1 38.52 6.37
 21 -25 -1 24.38 4.48
 -22 -25 -1 -3.88 3.03
 22 -25 1 -0.99 1.94
 22 -25 -1 -0.34 1.68
 23 -25 -1 98.9 8.6
 23 -25 1 110.48 9.33
 24 -25 1 4.36 2.47
 24 -25 -1 -2.72 2.17
 -24 -25 -1 -0.6 2.1
 25 -25 1 156.13 10.76
 -25 -25 -1 175.01 12.2
 26 -25 1 4 2.31
 -26 -25 -1 -1.27 1.8
 26 -25 -1 4.3 2.62
 27 -25 -1 87.3 7.24
 27 -25 1 118.86 8.99
 28 -25 -1 -1.05 1.3
 28 -25 1 4.44 2.31
 29 -25 1 32.77 4.6
 29 -25 -1 14.86 3.19
 30 -25 1 0.38 1.01
 -30 -25 1 3.04 1.97
 31 -25 1 1.52 1.53
 0 -26 1 21.86 5.74
 0 -26 -1 17.62 5.34
 -1 -26 -1 -2.68 2.42
 1 -26 1 1.39 2.77
 -1 -26 1 1.63 2.74
 2 -26 1 12.98 4.77
 -2 -26 1 17.48 4.8
 2 -26 -1 16.88 5.1
 -2 -26 -1 15.32 4.6
 -3 -26 1 -6.85 3.19
 3 -26 -1 0.6 2.88
 -3 -26 -1 -0.9 2.88
 3 -26 1 -2.65 2.8
 -4 -26 1 28.88 6.06
 -4 -26 -1 41.2 7.34
 4 -26 -1 22.83 6.17
 4 -26 1 33.56 6.94
 -5 -26 -1 -0.51 3.25
 5 -26 -1 4.9 2.89
 -5 -26 1 2.44 3.17
 5 -26 1 2.44 2.45
 6 -26 1 59.78 9.08
 -6 -26 1 46.37 7.6
 -6 -26 -1 60.31 8.28
 6 -26 -1 44.88 7.79
 -7 -26 -1 4.29 3.92
 -7 -26 1 -2.35 2.81
 7 -26 -1 -3.43 3.85
 7 -26 1 -1.58 2.53
 -8 -26 -1 53.01 7.88
 -8 -26 1 51.64 8.34
 8 -26 1 41.55 7.71
 8 -26 -1 53.34 8.31
 9 -26 1 7.11 4.13
 9 -26 1 5.4 4.07
 -9 -26 1 3.58 4.45
 9 -26 -1 -1.47 3.68
 -9 -26 -1 -0.79 4.12
 -10 -26 -1 61.64 8.56
 10 -26 1 49.25 7.96
 -10 -26 1 67.15 9.56
 10 -26 1 59.21 7.62
 11 -26 1 5.43 4.02
 -11 -26 -1 7.56 3.71
 -11 -26 1 4.24 3.84
 -12 -26 1 30.56 6.27
 12 -26 -1 24.76 4.82
 -12 -26 -1 33.78 6.16
 12 -26 1 39.41 5.98
 -13 -26 1 6.24 3.83
 13 -26 1 6.82 3.15
 13 -26 -1 3.88 2.74
 -13 -26 -1 4.62 2.4
 14 -26 1 7.19 3.02
 14 -26 -1 9.01 3.07
 -14 -26 1 14.02 4.8
 -14 -26 -1 17.29 4.67
 -15 -26 1 1.17 2.82
 15 -26 -1 2.52 2.3
 15 -26 1 4.19 2.43
 -15 -26 -1 4.77 2.89
 16 -26 -1 31.36 5.33
 -16 -26 1 44.77 7.38
 -16 -26 -1 42.98 6.81
 16 -26 1 33.32 5.48
 17 -26 -1 1.73 2.63
 17 -26 1 1.82 1.66
 -17 -26 1 4.35 3.95
 -17 -26 -1 -2.02 2.45
 -18 -26 -1 62.58 8.43
 18 -26 1 61.21 7.38
 18 -26 -1 43.33 6.08
 19 -26 1 3.06 2.86
 -19 -26 -1 2.98 3.55
 19 -26 -1 2.41 2.16
 20 -26 -1 22.68 4.46
 -20 -26 -1 27.71 5.66
 20 -26 1 24.1 4.69
 -21 -26 -1 2.63 2.15
 21 -26 1 -1.66 1.43
 21 -26 -1 3.43 2.41
 -22 -26 -1 16.21 4.69
 22 -26 -1 13.16 3.2
 22 -26 1 17.41 3.69
 23 -26 -1 3.23 2.12
 23 -26 1 -0.68 1.77
 -23 -26 -1 -0.31 1.92
 24 -26 -1 18.94 3.59
 -24 -26 -1 18.76 4.7
 24 -26 1 22.99 4.06
 -24 -26 1 27.96 5.71
 -25 -26 -1 2.15 2.26
 25 -26 1 -0.23 1.4
 -25 -26 1 1.7 2.31
 25 -26 -1 1.88 1.13
 26 -26 -1 10.36 2.55
 26 -26 1 10.07 3.08
 27 -26 -1 -0.27 1.19
 27 -26 1 3.79 2.09
 -27 -26 1 4.58 2.72
 28 -26 1 8.16 2.33
 -28 -26 1 18.05 4.26
 29 -26 1 1.36 1.25
 0 -27 -1 -0.32 3.3
 0 -27 1 -2.67 2.75
 1 -27 1 68.48 8.62
 -1 -27 1 58.34 7.88
 -1 -27 -1 48.55 7.76
 1 -27 -1 50.73 7.77
 -2 -27 1 0.87 3.44
 2 -27 1 2.29 2.35
 -2 -27 -1 -0.4 2.67
 2 -27 -1 2.12 3.67
 -3 -27 -1 8.17 3.25
 -3 -27 1 11.35 4.36
 3 -27 1 9.03 4.11
 3 -27 -1 9.04 4.44
 4 -27 -1 -1.36 2.41
 -4 -27 1 2.52 2.7
 4 -27 1 -1.55 3.3
 -4 -27 -1 -4.84 3.42
 5 -27 1 19.75 4.57
 -5 -27 1 17.51 4.18
 5 -27 -1 15.86 4.18
 -5 -27 -1 15.49 4.77
 -6 -27 1 -2.19 3.36
 6 -27 1 3.8 3.2
 6 -27 -1 4.28 2.74
 -6 -27 -1 4.06 4.14
 7 -27 1 81.68 9.51
 7 -27 -1 85.7 10.1
 -7 -27 1 99.46 10.23
 -7 -27 -1 79.25 9.35
 -8 -27 1 -4.28 3.19
 -8 -27 -1 0.13 3.18
 8 -27 1 -7.61 4.29
 8 -27 -1 4.55 3.6
 9 -27 1 87.14 10.08
 -9 -27 -1 89.77 9.78
 -9 -27 1 95.97 10.2
 -10 -27 -1 4.38 4.1
 -10 -27 1 4.52 3.33
 -11 -27 -1 21.51 5.09
 -11 -27 1 18.27 4.21
 12 -27 1 -4.23 2.01
 -12 -27 1 3.66 2.7
 -12 -27 -1 -3.57 2.94
 -13 -27 -1 -4.28 3.34
 -13 -27 1 5.19 3.08
 13 -27 1 0.08 1.85
 -14 -27 -1 6.07 3.14
 -14 -27 1 1.27 2.09
 14 -27 1 8.29 3.21
 -15 -27 -1 29.05 5.41
 -15 -27 1 23.69 4.68
 15 -27 1 26.12 4.84
 -16 -27 1 0.72 2.22
 -16 -27 -1 1.31 2.57
 16 -27 1 -1.12 2.14
 -17 -27 -1 46.44 6.9
 17 -27 1 36.87 5.3
 -17 -27 1 48.16 6.82
 18 -27 1 -2.05 1.83
 -18 -27 -1 1.93 1.95
 -18 -27 1 -0.54 1.86
 -19 -27 -1 24.44 4.99
 -19 -27 1 19.21 4.45
 19 -27 -1 11.48 3.16
 19 -27 1 19.82 3.97
 -20 -27 1 -2.07 2.5
 20 -27 1 -2.17 1.72
 -20 -27 -1 1 2.05
 20 -27 -1 2.18 1.98
 -21 -27 -1 2.09 2.72
 21 -27 -1 3.77 2.16
 21 -27 1 3.07 2.12
 -21 -27 1 7.53 3.39
 22 -27 1 1.89 2.05
 -22 -27 -1 4.49 2.37
 22 -27 -1 1.23 1.3
 -23 -27 -1 24.32 4.37
 23 -27 -1 16.68 3.17
 -23 -27 1 21.99 4.23
 23 -27 1 21.91 3.88
 -24 -27 -1 -1.2 1.65
 -24 -27 1 -0.44 1.77
 24 -27 -1 0.76 1.25
 24 -27 1 1.35 1.4
 -25 -27 1 55.09 7.02
 25 -27 1 50.24 5.49
 -26 -27 1 0.01 1.74
 26 -27 1 -0.49 1.44
 27 -27 1 15.31 2.97
 0 -28 -1 1.21 2.96
 0 -28 1 7.08 2.55
 -1 -28 1 -5.2 3.43
 1 -28 1 -5.61 3.8
 -1 -28 -1 1.04 2.72
 1 -28 -1 -1.81 3.08
 -2 -28 1 2.02 2.34
 2 -28 1 0.01 2.93
 -2 -28 -1 0.91 2.95
 2 -28 -1 2.38 2.33
 -3 -28 1 3.7 2.98
 3 -28 -1 -2.53 3.12
 -3 -28 -1 -0.53 2.19
 3 -28 1 3.31 3.77
 -4 -28 1 3.91 2.75
 4 -28 1 2.55 2.46
 -4 -28 -1 8.98 3.54
 4 -28 -1 2.88 2.98
 5 -28 -1 1.77 2.41
 -5 -28 1 4.39 2.79
 -5 -28 -1 4.27 3.62
 6 -28 1 1.22 2.34
 6 -28 -1 -1.05 2.39
 -6 -28 -1 2.19 2.78
 -6 -28 1 0.35 2.24
 -7 -28 1 5.39 2.64
 7 -28 1 1.14 2.44
 -7 -28 -1 -1.7 2.18
 8 -28 1 6.28 3.45
 -8 -28 1 3.13 2.55
 -8 -28 -1 7.09 3.58
 -9 -28 1 -2.5 2.31
 -9 -28 -1 0.17 1.97
 -10 -28 1 2.08 2.52
 -10 -28 -1 -1.36 2.01
 -11 -28 1 -0.11 2.43
 -11 -28 -1 2.21 2.35
 -12 -28 -1 1.17 2.25
 -12 -28 1 -1.85 2.75
 -13 -28 1 2.02 2.3
 -13 -28 -1 -2.27 1.94
 -14 -28 -1 1.58 2.16
 -14 -28 1 5.57 3.4
 -15 -28 -1 1.65 1.78
 -15 -28 1 3.91 3.05
 -16 -28 -1 6.48 3.75
 -16 -28 1 8.18 3.35
 -17 -28 -1 3.62 2.75
 -17 -28 1 -0.46 1.77
 17 -28 1 2.63 2.19
 18 -28 1 4.33 2.23
 -18 -28 1 8.68 3.59
 -18 -28 -1 7.78 3.55
 -19 -28 1 -0.7 1.99
 19 -28 1 0.95 2
 -19 -28 -1 -0.05 2.04
 -20 -28 1 1 1.91
 20 -28 1 0.5 1.4
 -20 -28 -1 1.5 2.48
 21 -28 1 1.53 1.48
 -21 -28 -1 -0.93 1.84
 -21 -28 1 -0.35 2.41
 -22 -28 -1 6.35 3.15
 -22 -28 1 4.54 3.2
 22 -28 1 1.49 1.3
 -23 -28 -1 -1.86 1.93
 -23 -28 1 -0.66 2.19
 23 -28 1 3.84 1.79
 24 -28 1 2.61 1.81
 -24 -28 1 3.32 2.35
 -25 -28 1 1.75 1.66
 25 -28 1 2.63 1.41
 0 -29 -1 -1.12 4.39
 0 -29 1 -11.91 4.2
 1 -29 -1 77.56 9.57
 -1 -29 1 73.43 8.86
 -1 -29 -1 65.19 8.63
 1 -29 1 79.31 9.36
 -2 -29 -1 -0.85 2.63
 2 -29 -1 -0.11 2.5
 2 -29 1 2.42 4.52
 -2 -29 1 -4.95 3.13
 3 -29 1 31.99 6.12
 -3 -29 -1 28.05 5.93
 3 -29 -1 30 5.83
 -3 -29 1 34.36 6.38
 4 -29 1 -1.99 2.33
 4 -29 -1 0.6 2.53
 -4 -29 -1 1.33 1.86
 -4 -29 1 3.05 3.53
 5 -29 -1 -2.74 2.81
 -5 -29 -1 -1.56 1.87
 5 -29 1 -2.07 3
 -5 -29 1 2.02 2.16
 -6 -29 1 -1.7 2.41
 6 -29 1 0.27 3.29
 -6 -29 -1 -2.76 2.96
 -7 -29 -1 12.28 3.8
 7 -29 1 16.89 4.89
 -7 -29 1 10.85 4.15
 -8 -29 1 2.17 2.99
 -8 -29 -1 -4.63 2.16
 -9 -29 -1 16.51 4.25
 -9 -29 1 15.92 4.38
 -10 -29 1 3.41 3.07
 -10 -29 -1 0.34 2.44
 -11 -29 -1 12.92 3.77
 -11 -29 1 27.14 5.77
 -12 -29 -1 -3.18 2.82
 -12 -29 1 8.14 3.3
 -13 -29 1 2.52 1.93
 -13 -29 -1 7.87 3.4
 -14 -29 1 -1.08 2.31
 -14 -29 -1 1.48 3.29
 -15 -29 -1 36.18 6.07
 -15 -29 1 44.64 6.38
 -16 -29 1 -0.2 3.09
 -16 -29 -1 -0.44 1.79
 -17 -29 1 82.97 8.68
 -17 -29 -1 80.14 8.34
 -18 -29 -1 -1.38 1.77
 -18 -29 1 -2.48 2.19
 -19 -29 -1 30.3 5.08
 -19 -29 1 32.86 5.33
 -20 -29 -1 0.97 1.77
 -20 -29 1 -2.16 2.31
 -21 -29 -1 6.87 2.84
 -21 -29 1 8.31 2.87
 -22 -29 1 2.92 2.37
 0 -30 -1 8.92 3.26
 0 -30 1 10.44 3.97
 1 -30 1 -0.68 2.56
 1 -30 -1 3.84 3.15
 -1 -30 1 -2.48 2.01
 2 -30 1 9.73 3.84
 -2 -30 1 9.14 3.51
 -2 -30 -1 19.38 5.69
 2 -30 -1 14.09 4.38
 -3 -30 1 -3.06 2.45
 3 -30 -1 -2.21 2.2
 3 -30 1 -0.51 1.91
 -3 -30 -1 -3.01 2.51
 4 -30 1 3.79 3.05
 -4 -30 -1 4.32 2.74
 -4 -30 1 5.16 3.26
 5 -30 1 2.17 2.47
 -5 -30 -1 4.97 3.43
 -5 -30 1 0.77 2.9
 -6 -30 -1 4.41 2.62
 -6 -30 1 7.39 3.79
 -7 -30 1 1.55 2.52
 -7 -30 -1 4.31 2.76
 -8 -30 -1 11.63 3.94
 -8 -30 1 10.79 4.27
 -9 -30 1 -1.82 2.36
 -9 -30 -1 2.17 2.53
 -10 -30 1 7.34 3.25
 -10 -30 -1 10.62 4.03
 -11 -30 1 -1.26 1.85
 -11 -30 -1 0.03 1.74
 -12 -30 1 4.22 3.36
 -12 -30 -1 0.55 1.75
 -13 -30 1 2.01 2.41
 -13 -30 -1 -0.43 1.9
 -14 -30 -1 3.6 2.15
 -14 -30 1 3.47 2.65
 -15 -30 -1 1.29 3.15
 -15 -30 1 -2.79 2.69
 -16 -30 -1 4.02 2.52
 -16 -30 1 8.07 3.67
 -17 -30 1 0.64 2.09
 -17 -30 -1 1.51 2.67
 -18 -30 -1 7.96 3.17
 -18 -30 1 14.77 4.33
 -19 -30 1 -0.86 2.26
 -20 -30 1 42.38 7.65
 0 -31 -1 0.79 2.99
 0 -31 1 -3.67 2.72
 -1 -31 1 35.08 5.93
 1 -31 1 33.84 5.62
 1 -31 -1 35.51 5.96
 -1 -31 -1 34.28 5.72
 2 -31 1 -5.18 2.66
 -2 -31 1 -0.71 1.82
 3 -31 1 16.55 4.1
 -3 -31 -1 22.24 4.99
 -3 -31 1 17.43 4.73
 -4 -31 -1 4.97 3
 -4 -31 1 2.05 3.15
 -5 -31 1 6.67 2.83
 -5 -31 -1 -0.89 2.27
 -6 -31 1 -2.33 2.44
 -6 -31 -1 -1.35 2.28
 -7 -31 1 8.42 3.86
 -7 -31 -1 3.44 2.84
 -8 -31 -1 5.78 3.56
 -8 -31 1 5.81 3.56
 -9 -31 1 26.12 5.48
 -9 -31 -1 28.69 5.48
 -10 -31 -1 -0.19 2.7
 -10 -31 1 4.43 3.32
 -11 -31 1 3.94 2.65
 -11 -31 -1 9.32 4.22
 -12 -31 -1 4.95 2.88
 -12 -31 1 4.11 2.34
 -13 -31 -1 0.65 2.11
 -13 -31 1 5.34 3.35
 -14 -31 1 0.17 1.67
 -14 -31 -1 5.99 3.59
 -15 -31 1 44.26 6.7
 -15 -31 -1 39.09 5.96
 -16 -31 1 3.35 3.36
 -17 -31 1 59.77 7.17
 0 -32 1 1.69 2.03
 1 -32 1 -1.16 1.65
 -1 -32 1 1.8 2.78
 -2 -32 -1 13.91 4.43
 -2 -32 1 6.92 3.33
 -3 -32 -1 1.64 2.72
 -3 -32 1 1.36 1.84
 -4 -32 -1 10.82 3.9
 -4 -32 1 9.61 3.16
 -5 -32 1 -0.27 1.77
 -5 -32 -1 0.33 2.39
 -6 -32 1 13.2 3.96
 -6 -32 -1 12.7 4.18
 -7 -32 1 6.77 3.49
 -7 -32 -1 1.57 2.83
 -8 -32 -1 14.35 4.53
 -8 -32 1 10.9 3.83
 -9 -32 -1 2.41 3
 -9 -32 1 3.04 2.39
 -10 -32 1 3.4 2.63
 -10 -32 -1 3.9 2.57
 -11 -32 -1 0.24 1.84
 -11 -32 1 0.57 1.85
 -12 -32 -1 3.09 2.05
 -12 -32 1 2.05 2.43
 -13 -32 1 2.25 2.36
 -2 -33 1 1.96 2.74
 -3 -33 1 4.61 1.8
 -4 -33 1 4.49 2.75
 -5 -33 1 1.3 2.02
 -6 -33 1 2.9 2.62
 -7 -33 1 27.58 5.03
 -8 -33 1 6.04 3.75
 0 0 -2 362.32 5.28
 -1 0 -2 0.53 0.4
 1 0 -2 -0.17 0.34
 2 0 -2 1188.87 11.65
 -2 0 -2 1244.55 8.3
 3 0 -2 0.5 0.42
 -3 0 -2 0.31 0.23
 4 0 -2 2393.97 19.52
 5 0 -2 13.64 1.87
 6 0 -2 1080.81 14.64
 7 0 -2 21.34 2.36
 8 0 -2 265.48 7.93
 9 0 -2 46.57 3.77
 10 0 -2 26.16 2.77
 11 0 -2 163.05 7.39
 12 0 -2 7.54 1.87
 13 0 -2 386.45 12.02
 14 0 -2 233.32 9.19
 14 0 2 233.64 7.53
 15 0 2 0.75 0.63
 15 0 -2 2.88 1.42
 16 0 2 312.51 9.35
 16 0 -2 306.09 11.25
 17 0 -2 0.32 1.19
 17 0 2 0.34 0.83
 18 0 2 31.27 3.2
 18 0 -2 29.6 3.8
 19 0 -2 24.94 3.82
 19 0 2 23.76 3.13
 19 0 2 24.02 3.35
 20 0 2 13.72 2.31
 20 0 -2 13.5 2.81
 20 0 2 14.01 2.43
 21 0 2 30.19 3.95
 21 0 2 29.41 3.59
 21 0 -2 35.95 4.89
 22 0 2 8.66 2.26
 22 0 -2 8.66 2.29
 23 0 2 23.8 3.75
 23 0 -2 28.43 4.57
 24 0 2 147.1 8.98
 24 0 -2 150.35 9.86
 25 0 2 40.37 5.19
 25 0 -2 46.49 5.81
 26 0 -2 124.72 9.55
 27 0 -2 12.87 3.52
 28 0 -2 39.69 5.85
 29 0 -2 14.76 3.97
 30 0 -2 78.82 8.37
 31 0 -2 37.42 6.27
 32 0 -2 475.34 22.11
 33 0 2 11.05 4.45
 33 0 -2 7.82 3.29
 33 0 -2 6.14 2.66
 34 0 -2 570.25 23.4
 34 0 2 578.7 24.12
 35 0 -2 25.99 5.13
 35 0 2 26.42 5.59
 36 0 -2 814.85 28.42
 36 0 2 813.79 28.9
 37 0 2 61.61 8.12
 37 0 -2 59.41 7.71
 38 0 -2 43.32 6.41
 38 0 2 43.51 6.89
 39 0 2 47.16 7.13
 39 0 -2 45.27 6.91
 40 0 2 86.02 9.36
 40 0 -2 91.31 9.49
 41 0 -2 3.28 2.34
 41 0 2 6.67 3.29
 42 0 2 85.44 8.97
 42 0 -2 85.39 8.76
 43 0 2 54.66 7.23
 43 0 -2 49.19 6.43
 44 0 -2 11.23 3.25
 44 0 2 13.5 4.07
 45 0 2 16.17 3.87
 45 0 -2 10.1 2.55
 46 0 2 19.56 3.57
 47 0 2 11.11 3.08
 0 1 -2 0.19 0.27
 0 -1 -2 0.17 0.25
 1 -1 -2 2.03 0.66
 -1 1 -2 1.09 0.39
 1 1 -2 1.08 0.51
 -1 -1 -2 1.15 0.54
 2 -1 -2 0.68 0.52
 -2 1 -2 0.2 0.19
 -2 -1 -2 0.39 0.38
 2 1 -2 0.49 0.56
 -3 -1 -2 3.22 0.66
 3 -1 -2 2.28 0.7
 3 1 -2 2.54 0.99
 -4 -1 -2 0.35 0.4
 4 1 -2 0.88 0.72
 4 -1 -2 -0.06 0.52
 5 1 -2 1.02 0.85
 5 -1 -2 1.06 0.73
 6 -1 -2 0.64 0.85
 6 1 -2 0.97 0.89
 7 -1 -2 3.46 1.32
 8 1 -2 1.81 1.04
 8 -1 -2 1.27 1.11
 9 1 -2 13.33 3.42
 9 -1 -2 5.53 1.91
 10 1 -2 0.91 1.24
 10 -1 -2 0.71 0.89
 11 -1 -2 0.12 1.01
 11 1 -2 -0.13 0.91
 12 -1 -2 0.12 1.1
 12 1 -2 0.28 0.96
 13 -1 -2 0.83 1.34
 13 1 -2 3.52 2.01
 14 -1 2 -0.04 0.66
 14 -1 -2 -0.81 1.01
 14 1 2 -0.78 0.83
 14 1 -2 -0.83 1.24
 15 1 2 0.17 0.74
 15 -1 2 2.57 1.91
 15 -1 -2 2.26 1.46
 15 1 -2 4.58 2.39
 15 -1 2 0.44 1.09
 16 1 2 0.94 0.83
 16 -1 2 -1.1 1.14
 16 -1 -2 0.71 1.13
 16 -1 2 0.85 0.56
 16 1 -2 -0.92 1.07
 17 1 -2 1.69 1.49
 17 1 2 0.95 0.88
 17 -1 2 -0.45 0.73
 17 -1 2 0.19 0.85
 17 -1 -2 0.79 1.31
 18 1 2 0.5 0.81
 18 -1 -2 1.58 1.6
 18 1 -2 1.69 1.28
 18 -1 2 1.08 1.04
 18 -1 2 1.1 0.86
 19 -1 -2 0.95 1.28
 19 -1 2 -0.15 0.7
 19 1 2 -0.29 0.82
 19 1 -2 0.97 1.08
 19 -1 2 0.65 0.85
 20 -1 -2 -0.39 1.14
 20 -1 2 1.54 1.19
 20 1 2 -0.17 1.21
 20 1 -2 0.54 1.12
 20 -1 2 -0.07 1.02
 21 -1 -2 -0.33 1.14
 21 -1 2 -0.16 1.15
 21 1 -2 0.37 1.46
 21 1 2 -0.32 0.91
 21 1 2 0.99 1.51
 22 1 -2 -1.24 1.23
 22 -1 -2 0.93 1.57
 22 1 2 -0.2 1.13
 22 1 2 1.21 1.09
 23 1 2 2.29 1.36
 23 -1 2 2.48 2.32
 23 -1 -2 1.63 1.44
 23 1 -2 3 1.85
 24 -1 2 1 1.17
 24 1 -2 1.51 1.91
 24 -1 -2 -0.08 1.53
 24 1 2 0.25 0.97
 25 -1 -2 0.77 1.58
 25 1 2 1.16 1.41
 26 1 -2 -1.45 1.92
 26 -1 -2 -1.91 1.48
 26 1 2 -0.47 1.37
 27 1 -2 4.6 3.09
 27 -1 -2 -1.75 2.15
 28 1 -2 1.57 2.14
 28 -1 -2 0.93 1.45
 29 -1 -2 1.8 2
 29 1 -2 -2.86 1.64
 30 1 -2 -2.16 1.92
 30 -1 -2 -0.55 1.8
 30 -1 -2 2.18 2.64
 31 1 -2 1.66 2.42
 31 -1 2 1.87 4.99
 31 -1 -2 3.01 2.53
 31 -1 -2 5.81 3.37
 32 -1 -2 -0.01 1.95
 32 1 -2 -1.12 1.69
 32 -1 2 -3.53 2.82
 32 -1 -2 -2.47 1.88
 33 1 -2 2.8 3.4
 33 -1 -2 10.62 4.67
 33 -1 -2 5.37 3.42
 34 -1 2 4.31 2.34
 34 -1 -2 2.3 2.28
 34 1 -2 6.28 3.78
 34 1 -2 0.27 1.91
 35 1 2 9.33 4.8
 35 1 -2 23.72 7.23
 35 -1 2 11.74 6.12
 35 -1 -2 9.85 5.27
 36 -1 2 6.28 3.2
 36 1 2 6.94 9.2
 36 1 -2 3.11 3.36
 36 -1 -2 2.92 2.54
 37 1 2 1.9 2.42
 37 -1 -2 2.09 1.8
 37 1 -2 4.68 3.26
 37 -1 2 2.27 3.7
 38 1 2 2.64 2.64
 38 1 -2 5.46 3.36
 38 -1 2 2.53 2.9
 38 -1 -2 3.4 2.99
 39 1 -2 3.87 2.69
 39 -1 -2 3.47 3.1
 39 -1 2 2.61 3.33
 39 1 2 5.91 3.81
 40 1 -2 -0.07 2.49
 40 1 2 -2.54 2.66
 40 -1 -2 -1.54 2.6
 40 -1 2 3.75 2.5
 41 -1 -2 -0.43 1.77
 41 -1 2 2.15 2.32
 41 1 -2 1.2 3.1
 41 1 2 4.87 3.2
 42 -1 2 -0.68 2.44
 42 -1 -2 0.38 1.5
 42 1 -2 3.09 2.44
 42 1 2 -1.67 1.78
 43 -1 2 1.22 2.01
 43 1 2 0.83 1.92
 43 -1 -2 2.96 2.16
 43 1 -2 4.18 2.64
 44 1 -2 -0.89 1.56
 44 -1 -2 -0.6 1.38
 44 1 2 0.97 1.95
 44 -1 2 -0.17 1.78
 45 1 -2 -0.19 1.35
 45 -1 2 2.06 2.23
 45 -1 -2 1.07 1.5
 45 1 2 1.48 2.06
 46 -1 2 2.49 2.21
 46 1 2 -0.89 1.84
 47 1 2 -0.57 1.37
 47 -1 2 3.41 2.29
 0 -2 -2 1227.1 11.49
 -1 -2 -2 0.89 0.5
 1 -2 -2 -0.13 0.36
 -1 2 -2 0.52 0.41
 -2 -2 -2 750.73 8.65
 2 -2 -2 755.01 9.54
 3 -2 -2 0.11 0.39
 -3 -2 -2 -0.13 0.43
 -4 -2 -2 10.81 1.12
 4 -2 -2 9.64 1.28
 5 -2 -2 0.53 0.78
 6 -2 -2 21.13 1.96
 7 -2 2 0.53 0.3
 7 -2 -2 0.79 0.59
 8 -2 -2 1360 17.16
 8 -2 2 1305.18 10.51
 9 -2 -2 0.13 0.75
 9 -2 2 -0.36 0.58
 10 -2 2 68.34 2.97
 10 -2 -2 73.83 4.43
 11 -2 -2 162.72 7.35
 11 -2 2 140.65 4.99
 12 -2 2 12.71 1.63
 12 -2 -2 15.14 2.42
 13 -2 2 0.54 0.49
 13 -2 2 -0.01 0.72
 13 -2 -2 0.47 0.84
 14 -2 2 62.81 3.64
 14 -2 2 55.06 3.1
 14 -2 -2 63.29 4.69
 15 -2 -2 18.86 2.88
 15 -2 2 17.31 2.21
 15 -2 2 13.69 1.77
 15 2 2 14.29 2.49
 16 -2 2 22.34 2.53
 16 2 2 17.96 2.63
 16 -2 2 19.61 2.05
 16 -2 -2 19.69 2.73
 16 2 -2 22.16 3.29
 17 2 2 2.03 0.97
 17 -2 2 2.43 0.95
 17 -2 -2 4.55 1.64
 17 2 -2 3.65 1.61
 17 -2 2 2.18 0.84
 18 2 -2 158.33 8.89
 18 2 2 157.01 7.76
 18 -2 2 130.83 5.36
 18 -2 -2 160.66 8.29
 18 -2 2 162.14 7.3
 19 -2 2 6.67 1.88
 19 -2 -2 5.56 1.8
 19 2 2 6.41 2.1
 19 2 -2 8.03 2.78
 20 -2 -2 9.44 2.2
 20 2 -2 10.3 2.88
 20 2 2 8.03 1.94
 20 -2 2 9.15 1.89
 21 2 2 19.44 3.43
 21 2 -2 20.07 3.68
 21 -2 2 16.95 2.87
 21 -2 -2 17.27 3.03
 22 2 2 106.91 7.33
 22 -2 2 99.53 6.5
 22 2 -2 106.36 8
 22 -2 -2 100.29 7.34
 23 2 -2 10.24 2.93
 23 2 2 8.43 2.61
 23 -2 -2 8.86 2.56
 23 2 2 8.13 2.69
 23 -2 2 9.44 2.26
 24 2 2 140.71 9.81
 24 2 -2 152.58 10.32
 24 -2 -2 144.08 9.29
 25 2 -2 25.47 4.69
 25 2 2 22.03 4.43
 25 -2 -2 20.21 3.84
 26 -2 -2 219.7 12.25
 26 2 2 218.51 12.48
 26 2 -2 254.24 14.51
 27 -2 -2 3.18 1.44
 27 2 -2 3.74 2.72
 27 2 2 1.55 1.95
 28 -2 -2 94.58 8.87
 28 -2 -2 95.86 8.8
 28 -2 2 94.98 9.38
 28 2 -2 102.58 9.51
 29 2 -2 26.34 5.28
 29 -2 -2 26.46 5.63
 29 -2 -2 22.34 4.73
 29 -2 2 23.66 4.91
 30 2 -2 14.82 3.99
 30 -2 -2 10.33 3.62
 30 -2 2 10.34 3.39
 30 -2 -2 13.3 3.49
 31 2 -2 4.92 2.64
 31 -2 -2 6.8 3.43
 31 -2 2 6.49 3.23
 31 -2 -2 7.03 3.13
 32 -2 2 414.2 19.99
 32 -2 -2 393.23 18.84
 32 -2 -2 370.57 19.31
 32 2 -2 402.37 21.04
 33 -2 -2 17.94 4.72
 33 -2 -2 26.85 5.27
 33 -2 2 29.7 5.95
 33 2 -2 23.5 5.51
 34 -2 2 835.09 28.8
 34 -2 -2 799.51 27.16
 35 -2 -2 22.4 5.62
 35 -2 2 26.66 6.16
 36 -2 2 44.33 6.81
 36 -2 -2 43.65 6.64
 36 2 -2 45.11 6.88
 37 -2 2 14.18 4.65
 37 -2 -2 13.41 4.39
 37 2 2 13.06 3.97
 37 2 -2 15.67 4.86
 38 2 2 3.45 2.91
 38 2 -2 3.11 4.98
 38 -2 -2 2.69 2.57
 38 -2 2 5.72 2.9
 39 2 2 6.47 2.79
 39 -2 -2 6.03 2.62
 39 -2 2 7.34 3.26
 39 2 -2 9.32 3.72
 40 -2 2 81.34 9.02
 40 2 2 88.26 9.59
 40 2 -2 88.97 8.96
 40 -2 -2 87.43 9.09
 41 2 -2 21.33 4.79
 41 -2 -2 21.05 4.88
 41 2 2 20.72 5.04
 41 -2 2 19.01 4.78
 42 2 2 96.52 9.55
 42 2 -2 104.02 9.77
 42 -2 2 101.04 9.87
 42 -2 -2 98.11 9.21
 43 2 2 1.99 2.39
 43 2 -2 3.82 2.28
 43 -2 2 4.11 2.28
 43 -2 -2 6.46 2.91
 44 -2 2 31.39 5.41
 44 2 -2 26.27 4.71
 44 -2 -2 26.58 4.77
 44 2 2 26.66 5.02
 45 2 2 16.98 4.02
 45 -2 2 17.15 3.78
 45 2 -2 15.87 3.48
 46 -2 2 12.54 3.03
 46 2 2 12.23 3.02
 47 -2 2 11.08 2.72
 47 2 2 13.93 2.88
 0 -3 -2 0.47 0.45
 1 -3 -2 2.59 0.92
 -1 -3 -2 2.54 0.86
 2 -3 -2 0.24 0.54
 -2 -3 -2 0.65 0.51
 -3 -3 -2 0.96 0.56
 3 -3 -2 0.72 0.65
 -4 -3 -2 0.57 0.51
 4 -3 -2 -0.12 0.48
 5 -3 -2 1.46 0.82
 6 -3 -2 0.03 0.75
 7 -3 -2 1.47 1.04
 7 -3 2 0.82 0.34
 8 -3 -2 5.19 1.67
 8 -3 2 2.53 0.69
 9 -3 -2 8.84 1.92
 9 -3 2 33.06 2.28
 10 -3 -2 0.63 0.7
 10 -3 2 0.17 0.45
 11 -3 2 4.73 1.11
 11 -3 -2 3.63 1.45
 12 -3 -2 0.77 0.92
 12 -3 2 -0.31 0.61
 13 -3 -2 0.75 1.11
 13 -3 2 0.15 0.36
 13 -3 2 0.12 0.65
 14 -3 2 -0.2 0.36
 14 -3 2 0.56 0.67
 14 -3 -2 0.33 1
 15 -3 2 2.99 0.94
 15 -3 2 4.76 1.56
 15 3 2 3.24 1.8
 15 -3 -2 6.34 2.15
 16 -3 2 1.47 1.02
 16 3 2 -0.13 0.89
 16 -3 2 1.06 0.61
 16 -3 -2 1.21 1.17
 17 -3 -2 1.3 1.03
 17 3 2 2.59 1.61
 17 -3 2 1.58 1.11
 18 -3 -2 1.66 1.28
 18 3 2 1.91 1.58
 18 -3 2 2.9 1.25
 19 -3 2 1.69 1
 19 3 -2 -0.36 1.16
 19 3 2 0.02 0.8
 19 -3 -2 0.27 0.86
 20 3 -2 0.77 1.51
 20 -3 -2 0.05 1.29
 20 -3 2 1.99 1.24
 20 3 2 -0.34 1.29
 21 3 2 1.68 1.75
 21 -3 -2 3.14 1.7
 21 -3 2 2.79 1.47
 21 3 -2 3.89 2.56
 22 3 -2 1.63 1.64
 22 3 2 -0.19 1.44
 22 -3 -2 1.81 1.64
 22 -3 2 -0.11 0.68
 23 -3 -2 1.07 1.55
 23 3 2 2.65 1.74
 23 3 -2 3.39 2.16
 24 -3 -2 -0.7 1.25
 24 3 -2 -0.3 1.52
 24 -3 -2 -0.22 1.49
 24 3 2 0.9 1.49
 25 3 -2 5.36 2.67
 25 -3 -2 4.76 2.34
 25 -3 2 6.4 2.45
 25 -3 -2 4.77 2.11
 25 3 2 4.19 2.41
 26 3 2 -0.25 1.64
 26 3 -2 -2.71 1.67
 26 -3 -2 1.04 1.54
 26 -3 -2 -0.59 1.43
 27 -3 -2 7.45 3.57
 27 -3 2 15.9 4.32
 27 3 -2 10.23 3.9
 27 3 2 2.59 2.44
 27 -3 -2 -0.91 1.24
 28 -3 -2 -3.78 2.18
 28 -3 2 -0.15 1.83
 28 3 -2 1.24 1.74
 28 3 2 0.18 1.72
 28 -3 -2 0.64 1.71
 29 3 -2 5.93 3.19
 29 -3 -2 5.68 3.07
 29 -3 2 6.1 3.76
 29 -3 -2 2.7 2.22
 30 -3 2 -1.23 2.96
 30 3 -2 3.17 4.92
 30 -3 -2 0.18 1.53
 30 -3 -2 1.68 1.88
 31 -3 -2 2.01 2.25
 31 -3 2 6.76 3.88
 31 -3 -2 1.78 1.99
 31 3 -2 2.85 2.98
 32 3 -2 0.32 2.45
 32 -3 -2 -0.24 1.79
 32 -3 2 -0.76 2.16
 32 -3 -2 0.72 1.86
 33 -3 2 45.03 7.85
 33 3 -2 36.28 7.56
 34 -3 2 4.1 3.27
 34 -3 -2 3.2 3.25
 34 3 -2 1.12 1.94
 35 -3 2 9.53 4.14
 35 -3 -2 0.62 1.88
 36 -3 2 2.07 3.43
 36 -3 -2 -1.14 2.39
 37 3 2 -1.08 2.64
 37 3 -2 0.07 2.21
 37 -3 2 3.85 3.13
 37 -3 -2 -0.41 1.74
 38 3 2 -1.75 2.66
 38 -3 2 0.91 2.15
 38 3 -2 0.22 2.16
 38 -3 -2 -0.6 1.68
 39 3 -2 1.35 3.19
 39 -3 2 1.94 1.89
 39 3 2 0.55 2.57
 39 -3 -2 0.57 1.94
 40 -3 -2 4.26 3.15
 40 -3 2 1.04 1.88
 40 3 2 1.84 2.13
 40 3 -2 0.74 2.31
 41 -3 -2 2.72 3.78
 41 -3 2 7.7 3.66
 41 3 -2 3.31 3.41
 41 3 2 8.38 4.04
 42 3 2 -1.99 2.96
 42 -3 -2 1.86 2.23
 42 -3 2 2.74 2.94
 42 3 -2 -1.03 2.16
 43 3 2 1.64 2.31
 43 3 -2 2.81 2.46
 43 -3 -2 1.39 1.64
 43 -3 2 2.27 2.58
 44 -3 -2 1.19 1.46
 44 -3 2 0.35 1.35
 44 3 2 1.75 2.09
 44 3 -2 -0.46 2.22
 45 3 -2 0.85 1.41
 45 -3 2 2.75 1.97
 45 3 2 2.03 1.85
 46 -3 2 1.83 2.04
 46 3 2 0.71 1.54
 47 3 2 -0.49 1.33
 47 -3 2 1.46 1.71
 0 -4 -2 4655.96 26.67
 1 -4 -2 0.71 0.58
 -1 -4 -2 0.97 0.68
 -2 -4 -2 47.42 2.67
 2 -4 -2 44.92 2.64
 -3 -4 -2 3.14 0.88
 3 -4 -2 2.57 0.91
 4 -4 -2 744.29 11.26
 -4 -4 -2 762.1 11.04
 5 -4 -2 -0.57 0.57
 6 -4 2 465.89 4.67
 6 -4 -2 553.89 10.3
 7 -4 2 17.47 1.14
 7 -4 -2 23.32 2.45
 8 -4 -2 63.98 3.77
 8 -4 2 64.61 2.05
 9 -4 2 4.25 0.71
 9 -4 -2 6.44 1.58
 10 -4 -2 526.32 11.63
 10 -4 2 506.22 7.08
 11 -4 2 15.73 1.53
 11 -4 -2 20.35 2.78
 12 -4 2 136.73 4.33
 12 -4 -2 138.45 6.48
 13 -4 2 0.39 0.23
 13 -4 2 0.89 0.58
 14 -4 -2 27.86 3.12
 14 -4 2 24.4 2.14
 14 4 2 25.45 2.97
 15 -4 -2 1.56 1.09
 15 -4 2 0.97 0.67
 15 4 2 -0.1 1.1
 16 4 2 69.22 5.17
 16 -4 -2 73.68 5.3
 16 -4 2 66.63 3.85
 17 -4 2 5.32 1.18
 17 4 2 3.31 1.52
 17 -4 -2 4.86 1.75
 18 -4 -2 445.13 13.79
 18 -4 2 441.35 10.79
 18 4 2 446.86 13.77
 19 -4 2 24.11 2.83
 19 -4 -2 25.3 3.52
 19 4 2 22.95 3.56
 20 -4 2 308.42 9.82
 20 4 2 310.23 12.25
 20 -4 -2 331.78 12.64
 21 4 2 10.97 2.76
 21 -4 -2 9.71 2.67
 21 -4 2 8.36 2.63
 21 -4 2 8.79 1.85
 21 4 -2 11.42 3.41
 22 4 2 196.36 10.48
 22 -4 -2 211.04 10.81
 22 4 -2 213.36 12.61
 22 -4 2 200.73 11.47
 23 4 2 0.34 1.48
 23 -4 -2 0.68 1.81
 23 -4 2 1.3 2.03
 23 4 -2 2.1 1.8
 23 -4 -2 2.25 1.03
 24 4 2 416.08 16.21
 24 4 -2 439.14 18.9
 24 -4 2 406.16 17.01
 24 -4 -2 416 16.02
 25 -4 -2 0.24 1.78
 25 -4 2 1.48 1.75
 25 4 2 0.6 1.46
 25 -4 -2 -0.62 1.19
 25 4 -2 0.47 1.79
 26 -4 -2 390.06 16.47
 26 -4 -2 356.86 16.36
 26 -4 2 378.86 17.24
 26 4 -2 403.03 18.96
 27 -4 -2 14.75 3.4
 27 -4 2 10.05 2.91
 27 4 2 10.99 3.12
 27 -4 -2 15.56 4.18
 27 4 -2 12.59 3.52
 28 -4 -2 185.21 12.34
 28 -4 2 195.03 13.09
 28 4 -2 205.16 14.44
 28 -4 -2 195.69 12.35
 28 4 2 183.88 13.19
 29 -4 -2 5.34 2.39
 29 -4 2 9.87 3.75
 29 4 -2 2.61 2.5
 29 -4 -2 6.98 2.95
 29 4 2 3.29 2.52
 30 -4 2 1.84 2.12
 30 -4 -2 -1.74 2.65
 30 4 -2 0.06 2.26
 30 -4 -2 1.79 1.17
 31 -4 -2 7.78 2.62
 31 -4 -2 5.14 2.24
 31 -4 2 7.41 2.86
 31 4 -2 12.72 4.41
 32 -4 2 453.81 21.53
 32 -4 -2 445.49 19.84
 32 4 -2 468.59 24.17
 33 4 -2 19.05 5.52
 33 -4 -2 15.06 4.22
 33 -4 2 17.04 4.68
 34 4 -2 40.06 7.78
 34 -4 2 51.63 7.27
 34 -4 -2 49.59 6.97
 35 -4 -2 15.77 6.22
 35 -4 2 3.63 2.85
 36 -4 2 18.36 4.93
 36 -4 -2 10.55 3.25
 37 -4 2 1.27 2.36
 37 -4 -2 0.09 1.95
 38 4 -2 3.98 2.87
 38 -4 -2 2.04 1.77
 38 -4 2 3.51 2.64
 38 4 2 5.36 2.87
 39 4 -2 2.06 2.79
 39 -4 2 1.34 1.69
 39 4 2 3.94 2.24
 39 -4 -2 2.56 2.83
 40 4 2 74.69 8.41
 40 -4 2 73.06 8.39
 40 4 -2 79.01 8.9
 40 -4 -2 68.08 7.9
 41 -4 2 1 2.05
 41 4 2 -2.71 3.33
 41 4 -2 4.39 3.38
 41 -4 -2 1.17 2.18
 42 4 -2 229.22 14.23
 42 4 2 223.32 14.29
 42 -4 -2 201.43 12.68
 42 -4 2 212.52 13.71
 43 -4 2 -1.69 2.06
 43 -4 -2 -0.09 1.69
 43 4 -2 0.6 1.64
 43 4 2 -1.52 2.21
 44 4 2 33.62 5.66
 44 -4 2 21.02 4.11
 44 4 -2 26.59 4.98
 45 -4 2 1.44 1.41
 45 4 -2 5.5 2.61
 45 4 2 1.57 2.28
 46 -4 2 2.75 1.57
 46 4 2 3.64 2.14
 47 -4 2 -3.17 1.86
 47 4 2 0.91 1.39
 0 -5 -2 -0.54 0.58
 -1 -5 -2 56.38 3.79
 1 -5 -2 55.63 3.84
 -2 -5 -2 0.78 0.65
 2 -5 -2 1.78 0.97
 -3 -5 -2 7.34 1.78
 3 -5 -2 11.88 1.81
 4 -5 -2 -0.13 0.69
 -4 -5 -2 0.45 0.71
 5 -5 -2 11.11 1.91
 6 -5 -2 -0.07 0.66
 6 -5 2 0.34 0.3
 7 -5 2 0.65 0.37
 7 -5 -2 2.52 1.31
 8 -5 2 3.12 0.78
 8 -5 -2 5.59 1.57
 9 -5 -2 17.52 3.09
 9 -5 2 16.47 1.64
 10 -5 2 0.02 0.36
 10 -5 -2 -0.64 1.04
 11 -5 -2 46.63 4.36
 11 -5 2 38.83 2.59
 12 -5 -2 3.01 1.39
 12 -5 2 1.68 0.76
 13 -5 2 1.95 0.77
 13 -5 -2 2.56 1.09
 14 -5 2 1.68 0.91
 14 5 2 2.76 1.25
 15 5 2 0.83 1
 15 -5 -2 0.97 0.8
 15 -5 2 -0.02 0.52
 16 -5 2 -0.1 0.6
 16 5 2 -0.99 0.98
 16 -5 -2 -1.14 0.98
 17 5 2 3.28 1.39
 17 -5 -2 5.16 1.89
 17 -5 2 1.88 0.78
 18 5 2 0.41 1.02
 18 -5 -2 1.05 1.13
 18 -5 2 1.04 1.11
 19 5 2 25.93 4.23
 19 -5 -2 24.69 4.25
 19 -5 2 18.3 2.96
 20 -5 -2 1.61 1.13
 20 5 2 -2.1 1.82
 20 -5 2 -2.2 2.14
 21 -5 2 7.67 3.63
 21 -5 -2 8.57 2.72
 21 5 2 7.55 2.89
 22 -5 -2 2.17 1.54
 22 5 2 0.33 1.46
 22 -5 2 2.43 2.36
 23 -5 2 7.99 3.17
 23 -5 -2 4.65 2.49
 23 5 -2 4.74 2.82
 23 5 2 4.92 2.08
 23 -5 -2 4.85 2.09
 24 -5 -2 -0.57 1.39
 24 5 2 -0.73 1.73
 24 -5 2 -0.05 1.91
 24 5 -2 -0.67 2.21
 24 -5 -2 0.49 1.48
 25 -5 -2 8.02 3.04
 25 -5 -2 9.73 3.59
 25 5 2 6.51 2.53
 25 5 -2 5.98 3.14
 25 -5 2 10.52 4.26
 26 -5 2 0.97 1.75
 26 -5 -2 0.91 1.39
 26 5 2 -1.06 1.27
 26 5 -2 0.16 1.84
 26 -5 -2 -1.35 2.11
 27 5 -2 1.93 1.87
 27 -5 2 7.31 3.63
 27 -5 -2 7.54 2.89
 27 -5 -2 4.81 2.9
 28 5 -2 -0.08 1.68
 28 5 2 2.55 2.67
 28 -5 2 3.17 2.95
 28 -5 -2 0.22 1.52
 28 -5 -2 0.04 1.61
 29 5 -2 -0.65 2.36
 29 -5 -2 -0.05 1.78
 29 -5 -2 0.87 1.78
 29 5 2 1.26 2.13
 29 -5 2 5.12 3.3
 30 -5 -2 2.69 2.7
 30 -5 2 -4.07 2.55
 30 -5 -2 0.42 1.44
 30 5 -2 1.77 3.05
 31 -5 2 4.72 3.14
 31 -5 -2 5.34 3.33
 31 5 -2 5.91 3.59
 31 -5 -2 3.04 2.71
 32 -5 -2 -0.57 1.74
 32 -5 2 2.44 2.84
 32 5 -2 -1.64 3.12
 33 -5 -2 -1.21 1.92
 33 -5 2 -0.52 1.96
 33 5 -2 4.06 3.31
 34 -5 -2 0.29 2.43
 34 5 -2 -0.72 3
 34 -5 2 2.65 2.48
 35 -5 -2 7.11 4.78
 35 -5 2 3.33 3.3
 36 -5 -2 -0.25 2.22
 36 -5 2 -4.15 2.71
 37 -5 2 5.31 2.9
 37 -5 -2 -0.48 1.57
 38 -5 -2 0.48 1.7
 38 -5 2 1.48 2.49
 39 -5 -2 6.41 3.38
 39 -5 2 3.12 3
 39 5 2 2.96 2.77
 39 5 -2 3.15 2.61
 40 5 2 1.04 1.98
 40 -5 -2 3.69 2.5
 40 5 -2 -1.14 2.14
 40 -5 2 1.48 2.16
 41 -5 -2 6.84 2.43
 41 5 -2 6.35 3.49
 41 5 2 10.3 4.39
 41 -5 2 8.23 3.49
 42 -5 -2 -1.05 1.62
 42 -5 2 1.44 2.42
 42 5 2 1.24 2.44
 42 5 -2 1.78 2.38
 43 5 -2 0.51 1.5
 43 5 2 2.31 2.04
 43 -5 -2 2.37 1.72
 43 -5 2 3.55 2.11
 44 -5 2 -0.68 1.26
 44 5 -2 -3.35 2.45
 44 5 2 0.95 1.9
 45 5 -2 1.36 1.55
 45 5 2 3.04 2.01
 45 -5 2 2.62 2.87
 46 5 2 1.94 1.65
 46 -5 2 -1.09 1.66
 47 5 2 -2.19 1.88
 47 -5 2 -1.68 1.47
 0 -6 -2 3 0.97
 1 -6 -2 4.39 1.3
 -1 -6 -2 7.1 1.5
 -2 -6 -2 2136.63 20.84
 2 -6 -2 2127.84 20.7
 -3 -6 -2 16.78 2.09
 3 -6 -2 15.19 2.14
 -4 -6 -2 24.73 2.35
 4 -6 -2 23.38 2.24
 5 -6 -2 8.07 1.51
 6 -6 -2 1035.91 15.22
 6 -6 2 1055.64 10.52
 7 -6 -2 72.73 4.35
 7 -6 2 71.55 2.93
 8 -6 2 602.29 8.02
 8 -6 -2 600.76 12.11
 9 -6 2 7.61 1.09
 9 -6 -2 9.04 1.83
 10 -6 2 2069.22 15.88
 10 -6 -2 2057.32 23.73
 11 -6 2 2.44 0.81
 11 -6 -2 2.5 1.31
 12 -6 2 62.32 3.03
 12 -6 -2 62.53 4.44
 13 -6 2 10.26 1.49
 13 -6 -2 7.91 2.06
 14 -6 -2 175.18 7.75
 14 6 2 175.98 8.37
 14 -6 2 166.13 5.29
 15 6 2 2.18 1.43
 15 -6 -2 2.07 1.3
 15 -6 2 1.98 0.87
 16 -6 -2 231.81 9.45
 16 -6 2 221.23 6.68
 16 6 2 226.92 10.1
 17 6 2 36.56 4.29
 17 -6 -2 40.04 4.29
 17 -6 2 36.02 2.94
 18 6 2 1029.74 22.5
 18 -6 -2 1012.83 21
 19 6 2 -0.56 1.25
 19 -6 -2 0.73 0.84
 20 -6 2 61.54 6.33
 20 6 2 64.78 6.13
 20 -6 -2 63.93 5.5
 21 -6 -2 12.44 2.61
 21 -6 2 12.37 3.49
 21 6 2 9.63 2.67
 22 6 2 27.42 4.31
 22 -6 2 25.8 4.76
 22 -6 -2 21.55 3.72
 22 -6 -2 25.51 3.73
 23 6 2 56.57 6.58
 23 -6 -2 67.05 6.37
 23 -6 2 58.49 6.91
 23 -6 -2 56.02 6.58
 24 6 2 530.94 19.54
 24 -6 -2 484.69 18.58
 24 -6 -2 532.07 17.91
 24 -6 2 498.83 19.02
 24 6 -2 549.72 22.38
 25 -6 2 3.71 2.61
 25 -6 -2 3.75 2.6
 25 6 2 3.57 2.19
 25 6 -2 3.01 3.14
 25 -6 -2 1.02 1.13
 26 -6 -2 549.5 20.35
 26 -6 2 561.09 20.98
 26 -6 -2 582.38 20.07
 26 6 -2 608.45 25.15
 26 6 2 536.08 20.75
 27 -6 -2 29.73 4.65
 27 -6 -2 29.77 5.43
 27 -6 2 26.55 5.3
 27 6 2 26.43 4.72
 27 6 -2 32.08 6.56
 28 6 -2 197.45 14.64
 28 -6 2 179.72 12.34
 28 -6 -2 183.46 11.85
 28 -6 -2 168 11.71
 29 6 -2 0.74 2.17
 29 6 2 0.35 1.86
 29 -6 -2 1.34 2.31
 29 -6 2 4.74 3.3
 29 -6 -2 2.95 2.89
 30 6 -2 42.98 7.69
 30 -6 -2 35.37 5.29
 30 6 2 31.23 6.05
 30 -6 -2 38.76 5.58
 30 -6 2 42.83 6.16
 31 -6 -2 3.7 1.61
 31 6 -2 4.88 2.88
 32 -6 2 -1.11 1.67
 32 -6 -2 2.87 2.66
 33 6 -2 16 5.11
 33 -6 2 13.4 4.06
 33 -6 -2 12.99 3.48
 34 -6 2 12.02 3.75
 34 -6 -2 7.56 3.25
 35 -6 -2 1.16 1.82
 35 -6 2 1.46 1.6
 36 -6 2 116.8 10.59
 36 -6 -2 87.39 9.1
 37 -6 2 38.63 6.56
 37 -6 -2 39.52 6.21
 38 -6 -2 6.75 3
 38 -6 2 2.91 2.21
 39 -6 -2 11.32 3.11
 39 -6 2 17.74 4.65
 40 -6 -2 207.29 13.14
 40 6 -2 224.24 14.94
 40 6 2 220.23 14.62
 40 -6 2 224.98 14.28
 41 6 2 8.92 3.22
 41 -6 2 7.32 2.74
 41 6 -2 7.86 3.18
 41 -6 -2 8.02 2.69
 42 -6 -2 160.17 10.93
 42 6 -2 172.51 12.47
 42 6 2 175.93 12.6
 42 -6 2 167.72 11.69
 43 -6 -2 4.2 2.13
 43 6 -2 4.22 2.23
 43 6 2 5.36 3.15
 43 -6 2 8.23 3.18
 44 6 -2 65.14 7.21
 44 -6 2 62.68 6.72
 44 6 2 65.84 7.48
 45 -6 2 7.13 2.47
 45 6 -2 3.7 2.22
 45 6 2 3.92 1.61
 46 -6 2 4.01 1.8
 46 6 2 2.95 2.04
 47 6 2 4.33 2.26
 0 -7 -2 0.53 0.63
 -1 -7 -2 195.63 7.55
 1 -7 -2 159.65 7.38
 2 -7 -2 1.72 1.34
 -2 -7 -2 6.09 2.04
 -3 -7 -2 23.6 3.34
 3 -7 -2 27.35 3.45
 -4 -7 -2 0.64 0.85
 4 -7 -2 1.59 0.94
 4 7 -2 1.17 1.17
 5 -7 -2 -0.08 0.69
 5 7 -2 2.91 1.74
 6 -7 -2 -1.1 0.82
 6 7 -2 -0.89 1.03
 7 -7 -2 1.34 0.91
 7 7 -2 2.58 1.62
 7 -7 2 1.79 0.73
 8 -7 2 0.16 0.42
 8 7 -2 0.38 1.09
 8 -7 -2 0.9 0.89
 9 7 -2 7.77 2.89
 9 -7 -2 8.05 1.87
 9 -7 2 5.17 1.16
 10 -7 2 -1.05 0.66
 10 -7 -2 0 0.77
 10 7 -2 0.82 1.25
 11 -7 2 24.19 2.37
 11 -7 -2 35.73 3.94
 11 7 -2 30.97 4.62
 12 -7 -2 0.16 0.76
 12 -7 2 1.8 0.86
 13 -7 2 37.33 3.07
 13 -7 -2 50.64 4.9
 13 7 2 43.68 5.64
 14 7 2 -0.97 1.24
 14 -7 2 0 0.51
 15 -7 2 69.17 4.44
 15 7 2 83.27 7.72
 15 -7 -2 94.29 7.26
 16 -7 2 1.47 0.77
 16 7 2 1.98 1.7
 16 -7 -2 3.91 1.85
 17 -7 -2 65.22 5.93
 17 7 2 68.42 6.52
 17 -7 2 48.84 3.78
 18 7 2 -0.44 1.11
 18 -7 -2 4.51 1.65
 19 -7 2 53.44 7.15
 19 -7 -2 57.42 6.21
 19 7 2 65.35 7
 20 -7 -2 1.3 0.93
 20 -7 2 -0.15 1.89
 20 7 2 0.27 1.27
 21 -7 -2 37.93 6.03
 21 -7 2 48.85 7.48
 21 -7 -2 51.26 5.98
 21 7 2 40.9 6.52
 22 -7 2 -1.55 2.16
 22 7 2 0.33 1.63
 22 -7 -2 -0.01 1.01
 22 -7 -2 -1.06 1.79
 23 -7 2 42.93 7.15
 23 -7 -2 55.71 6.32
 23 7 2 38.75 7.05
 23 -7 -2 35.74 6.32
 24 -7 2 1.53 2.49
 24 7 2 3.17 2.36
 24 -7 -2 0.96 1.78
 24 -7 -2 1.97 1.62
 25 -7 -2 30.13 5.92
 25 -7 -2 32.42 5.4
 25 7 2 33.69 6.31
 25 7 -2 33.2 7.13
 25 -7 2 31.05 6.38
 26 -7 2 -2.14 2.58
 26 7 -2 -0.96 2.55
 26 -7 -2 -0.26 1.72
 26 -7 -2 1.05 1.56
 26 7 2 -2.59 3.05
 27 7 -2 19.75 6.44
 27 -7 2 20.21 5.38
 27 -7 -2 20.25 5.27
 27 7 2 17.18 5.16
 27 -7 -2 13.16 3.64
 28 -7 2 0.36 1.6
 28 -7 -2 0.63 1.22
 28 7 -2 2.61 2.33
 28 -7 -2 1.69 2.48
 28 7 2 -0.39 1.46
 29 -7 -2 4.32 2.63
 29 -7 -2 6.25 2.7
 29 -7 2 6.35 3.77
 29 7 -2 2.84 3.58
 30 -7 -2 -1.48 1.85
 30 -7 2 0.42 2.18
 30 7 -2 2.3 2.48
 30 7 2 -0.9 2.44
 31 7 -2 4.21 4.08
 31 -7 -2 0.88 2.71
 32 -7 -2 1.22 1.5
 32 7 -2 -1.52 2.65
 32 -7 2 -1.27 2.36
 33 -7 -2 7.56 3.47
 33 -7 2 8.4 4
 33 7 -2 9.44 4.93
 34 -7 -2 1.57 4.19
 34 -7 2 2.11 2.63
 35 -7 -2 10.42 3.95
 35 -7 2 14.1 5.28
 36 -7 2 -4.19 2.5
 36 -7 -2 1.32 1.78
 37 -7 2 33.89 6.69
 37 -7 -2 26.7 5.67
 38 -7 2 0.59 2.5
 38 -7 -2 1.7 1.82
 39 -7 2 21.02 5.1
 39 -7 -2 18.97 4.73
 40 -7 2 2.25 1.94
 40 -7 -2 2.05 2.35
 41 -7 2 16.65 4.15
 41 -7 -2 13.68 3.48
 41 7 2 17.81 5.11
 41 7 -2 14.15 4.97
 42 -7 -2 -0.13 1.18
 42 7 -2 -2.29 2.67
 42 7 2 -2.75 2.25
 42 -7 2 3.26 2.54
 43 7 -2 10.63 3.8
 43 7 2 15.11 4.68
 43 -7 2 13.49 3.89
 44 -7 2 1.6 1.55
 44 7 -2 -0.31 1.3
 44 7 2 -1.04 2.01
 45 7 2 8.57 3.04
 45 -7 2 10.16 3.24
 45 7 -2 7.82 2.71
 46 7 2 -0.43 2.11
 46 -7 2 2.04 1.71
 0 -8 -2 5.41 1.24
 -1 -8 -2 64.26 4.43
 1 -8 -2 69.46 4.38
 -2 -8 -2 4.43 1.27
 2 -8 -2 4.2 1.46
 -3 -8 -2 97.75 5.13
 3 -8 -2 93.78 5.03
 3 8 -2 91.59 5.98
 4 -8 -2 211.21 7.42
 4 8 -2 202.93 8.5
 5 -8 -2 4.96 1.59
 5 8 -2 1.9 1.72
 6 -8 -2 501.24 11.26
 6 8 -2 454.55 13.39
 7 -8 2 46.26 3.06
 7 -8 -2 50 3.89
 7 8 -2 41.51 4.62
 8 -8 -2 134.3 6.23
 8 -8 2 134.73 4.81
 8 8 -2 135.7 7.78
 9 -8 -2 0.36 0.84
 9 -8 2 1.54 0.65
 9 8 -2 1.92 1.66
 10 -8 -2 625.16 14.01
 10 -8 2 629.77 10.29
 10 8 -2 594.67 16.34
 11 -8 -2 0.8 0.98
 11 -8 2 0.91 0.62
 11 8 -2 2.3 1.72
 12 8 2 221.11 9.76
 12 -8 2 199.81 5.98
 12 -8 -2 212.75 8.5
 12 8 -2 194.89 9.65
 13 -8 2 3.77 0.84
 13 8 2 3.46 1.49
 14 8 2 34.58 4.13
 14 -8 -2 33.51 3.52
 14 -8 2 30.55 2.5
 15 -8 -2 6.68 2.25
 15 -8 2 5.82 1.25
 15 8 2 5.8 2.2
 16 8 2 2309.66 34.22
 16 -8 -2 2359.85 31.36
 17 8 2 17.21 3.33
 17 -8 -2 18.22 3.14
 18 8 2 256.84 12.05
 18 -8 -2 262.19 11.02
 18 -8 2 250.13 12.12
 19 -8 -2 1.9 1.32
 19 -8 2 2.66 1.86
 19 8 2 4.74 2.24
 20 8 2 0.73 1.1
 20 -8 -2 2.38 1.16
 20 -8 2 2.91 1.82
 21 8 2 39.41 5.66
 21 -8 -2 35.29 5.25
 21 -8 -2 50.28 5.43
 21 -8 2 41.93 5.75
 22 -8 -2 55.19 6.19
 22 8 2 61.21 6.73
 22 -8 2 63.61 6.77
 22 -8 -2 66.39 6.19
 23 -8 -2 0.83 1.06
 23 -8 -2 0.41 1.81
 23 8 2 3.2 1.78
 23 -8 2 0.4 2.32
 24 -8 -2 247.49 13.52
 24 8 2 269.31 14.53
 24 -8 -2 278.02 13.36
 24 -8 2 270.45 14.24
 25 -8 -2 57.76 7.07
 25 -8 -2 63.69 6.91
 25 -8 2 57.57 7.27
 25 8 2 55.44 7.32
 26 8 2 504.76 21.25
 26 -8 -2 538.37 19.56
 26 8 -2 545.54 24.74
 26 -8 2 542.6 20.74
 26 -8 -2 501.67 19.5
 27 -8 2 1.52 2.02
 27 8 2 -0.78 2.14
 27 -8 -2 -0.3 2.3
 27 8 -2 -0.26 2.78
 27 -8 -2 -0.05 1.36
 28 -8 2 39.11 6.01
 28 -8 -2 33.64 5.18
 28 8 2 34.61 5.85
 28 8 -2 41.94 7.52
 28 -8 -2 33.06 4.95
 29 -8 2 1.61 2.1
 29 -8 -2 0.93 2.17
 29 8 -2 2.18 3.12
 30 8 -2 28.03 6.09
 30 -8 -2 25.55 4.71
 31 8 2 19.8 5.4
 31 8 -2 31.4 7.26
 31 -8 2 26.75 5.22
 31 -8 -2 26.41 5.22
 32 -8 -2 4.9 2.32
 32 8 -2 8.01 4.12
 32 -8 2 2.87 2.36
 33 -8 -2 0.51 1.66
 33 -8 2 0.59 2.23
 34 -8 2 108.6 10.28
 34 -8 -2 103.29 9.33
 35 -8 -2 40.46 5.75
 35 -8 2 47.53 6.9
 36 -8 2 24.11 4.96
 36 -8 -2 22.93 4.48
 37 -8 -2 14.49 3.62
 37 -8 2 9.02 2.98
 38 -8 2 38.54 5.98
 38 -8 -2 39.15 5.74
 39 -8 -2 29.29 5.18
 39 -8 2 19.33 4.85
 40 -8 2 100.9 9.41
 40 -8 -2 94.03 8.73
 41 8 -2 18.35 4.6
 41 -8 -2 12.54 3.07
 41 -8 2 19.71 4.06
 42 8 2 159.38 12.12
 42 -8 2 161.43 11.27
 42 8 -2 155.9 11.39
 43 -8 2 12.8 3.28
 43 8 -2 7.21 2.72
 43 8 2 6.59 3.26
 44 -8 2 108.03 8.71
 44 8 2 110.55 9.42
 44 8 -2 96.93 8.19
 45 8 -2 6.45 2.01
 45 -8 2 7.59 2.45
 45 8 2 7.54 2.96
 46 -8 2 15.01 2.96
 46 8 2 14.08 3.35
 0 -9 -2 -0.08 0.94
 1 -9 -2 19.44 2.97
 -1 -9 -2 19.25 2.83
 2 -9 -2 10.32 2.13
 -2 -9 -2 7.88 2.08
 2 9 -2 6.54 2
 3 9 -2 30.1 4.25
 -3 -9 -2 36.98 3.84
 3 -9 -2 30.37 3.65
 4 -9 -2 6.57 1.93
 4 9 -2 4.73 2.09
 5 9 -2 40.18 5.03
 5 -9 -2 44.74 4.35
 6 9 -2 -0.91 1.59
 6 -9 -2 0.33 0.92
 7 -9 -2 48.91 4.87
 7 9 -2 51.13 5.66
 8 -9 -2 1.9 1.34
 8 9 -2 3.32 1.6
 8 -9 2 1.93 0.9
 9 -9 -2 80.52 6.02
 9 -9 2 65.93 4.32
 9 9 -2 80.94 7.44
 10 -9 2 0.12 0.49
 10 -9 -2 0.11 1.06
 10 9 -2 -0.29 1.25
 11 9 2 206.12 11.16
 11 -9 -2 195.81 9.53
 11 9 -2 203.79 11.36
 12 9 2 -0.98 1.09
 12 -9 -2 2.05 1.44
 12 -9 2 -0.93 0.71
 12 9 -2 -0.25 1.06
 13 9 2 320.55 14.04
 13 -9 -2 359.58 12.78
 13 9 -2 360.52 15.25
 14 9 2 -2.6 1.7
 14 -9 -2 2.84 2.1
 14 -9 2 1.37 1.01
 15 9 2 187.95 11.27
 15 -9 -2 190.35 10.2
 16 -9 -2 1.67 1.37
 16 9 2 -0.31 1.15
 17 -9 -2 62.31 6.02
 17 -9 2 51.32 6.47
 17 9 2 45.82 6.88
 18 9 2 0.11 1.22
 18 -9 -2 1.07 1.16
 19 9 2 24.97 4.9
 19 -9 -2 27.48 4.35
 19 -9 2 23.53 4.65
 20 -9 -2 1.18 1.07
 20 -9 -2 -1.42 1.7
 20 -9 2 -3 1.48
 20 9 2 -2.06 1.51
 21 -9 -2 45.27 6.77
 21 -9 2 57.28 7.74
 21 9 2 56.64 7.63
 21 -9 -2 63.05 6.76
 22 9 2 0.39 1.6
 22 -9 -2 1.14 1.32
 22 -9 -2 -0.56 2.06
 22 -9 2 -1.49 2.3
 23 9 2 66.29 9.06
 23 -9 2 71.34 9
 23 -9 -2 74.48 7.78
 23 -9 -2 60.25 7.92
 24 -9 -2 -0.29 1.04
 24 -9 -2 0.3 2.23
 24 -9 2 0 1.86
 24 9 2 1.02 2.24
 25 -9 -2 71.63 8
 25 9 2 77.32 10.04
 25 -9 -2 75.2 8.75
 25 -9 2 92.77 10.04
 26 -9 -2 1.08 1.68
 26 -9 -2 -1.03 1.81
 26 -9 2 -0.48 2.22
 26 9 2 0.07 1.6
 27 -9 -2 24.57 5.23
 27 -9 2 25.51 5.4
 27 -9 -2 19.83 4.47
 27 9 -2 17.97 6.17
 27 9 2 22.26 5.37
 28 9 2 -0.65 2.29
 28 -9 -2 -0.18 1.67
 28 -9 2 -1 1.96
 28 9 -2 1.36 3.55
 29 9 -2 16.78 5.84
 29 -9 2 21.26 5.18
 29 -9 -2 19.26 4.54
 30 -9 2 0.49 2.56
 30 -9 -2 -0.89 1.52
 30 9 -2 2.59 3.79
 31 -9 2 28.65 5.69
 31 -9 -2 28.09 5.52
 31 9 -2 20.9 7.51
 32 9 -2 -2.53 2.56
 32 -9 -2 1.26 1.81
 32 -9 2 -0.17 2.35
 33 -9 -2 16.58 4.39
 33 -9 2 22.85 5.51
 34 -9 -2 4.13 2.87
 34 -9 2 4.74 2.95
 35 -9 2 49.45 7.78
 35 -9 -2 36.76 6.29
 36 -9 -2 -0.37 1.82
 36 -9 2 -1.5 2.07
 37 -9 2 36.28 6.84
 37 -9 -2 29.75 5.46
 38 -9 -2 0.19 1.62
 38 -9 2 -0.13 1.68
 39 -9 -2 16.01 4.05
 39 -9 2 19.29 4.82
 40 -9 2 1.76 1.93
 40 -9 -2 -0.39 1.48
 41 -9 2 17.08 4.45
 41 -9 -2 14.97 3.71
 42 9 2 2.21 2.42
 42 -9 2 -0.13 1.53
 42 9 -2 0.89 2.03
 43 9 2 24.56 5.81
 43 9 -2 17.38 4.57
 43 -9 2 22.83 4.51
 44 -9 2 1.57 1.85
 44 9 -2 0.66 1.31
 44 9 2 3.58 2.55
 45 9 2 14.42 4.24
 45 -9 2 19.77 3.87
 46 9 2 2.23 1.25
 0 -10 -2 24.58 2.98
 -1 -10 -2 105.65 6.13
 1 -10 -2 109.86 6.2
 2 -10 -2 221.94 8.27
 2 10 -2 222.78 9.94
 -2 -10 -2 231.01 8.62
 3 10 -2 67.59 5.89
 3 -10 -2 65.61 4.75
 4 -10 -2 23.62 2.83
 4 10 -2 19.1 3.11
 5 -10 -2 -0.48 0.73
 5 10 -2 3.19 1.84
 6 10 -2 75.26 6.12
 6 -10 -2 82.09 5.19
 7 -10 -2 1.12 0.85
 7 10 -2 0.79 1.51
 8 -10 -2 454.56 12.33
 8 10 -2 423.29 14.56
 9 -10 2 1.35 0.61
 9 -10 -2 1.11 0.89
 9 10 -2 2.75 1.58
 10 10 2 679.49 17.88
 10 -10 -2 693.26 15.75
 10 -10 2 700.47 12.76
 11 -10 2 16.8 2.07
 11 -10 -2 15.15 2.63
 11 10 2 16.62 3.19
 11 10 -2 14.78 3.06
 12 10 -2 318.13 13.37
 12 -10 -2 349.87 11.61
 12 10 2 337.28 12.93
 12 -10 2 331.09 8.87
 13 -10 2 6.12 1.32
 13 -10 -2 6.04 2
 13 10 -2 1.37 1.31
 13 10 2 6.01 1.9
 14 10 2 360.5 14.03
 14 -10 -2 363.92 12.49
 15 -10 -2 10.03 2.18
 15 10 2 6.88 2.24
 16 10 2 169.19 10.01
 16 -10 -2 170.52 8.98
 16 -10 2 160.44 9.37
 17 -10 2 22.98 4.31
 17 10 2 23.12 3.96
 17 -10 -2 27.52 3.82
 18 -10 -2 485.6 15.85
 18 10 2 466.98 17.53
 18 -10 2 456.17 16.7
 19 -10 -2 1.3 1.62
 19 -10 2 5.67 2.36
 19 10 2 2.11 1.75
 19 -10 2 2.45 1.32
 19 -10 -2 2.69 1.44
 20 -10 -2 49.9 5.69
 20 -10 2 52.56 5.92
 20 10 2 50.38 6.23
 20 -10 -2 53.65 5.53
 20 -10 2 44.55 5.43
 21 -10 -2 9.21 2.94
 21 -10 2 9.76 3.03
 21 10 2 7.44 2.93
 21 -10 2 5.61 2.53
 21 -10 -2 6.98 2.45
 22 10 2 126.87 10.17
 22 -10 -2 126.61 8.91
 22 -10 -2 120.29 8.7
 22 -10 2 113.18 9.39
 22 -10 2 98.39 8.03
 23 10 2 50.85 7.13
 23 -10 2 45.74 6.53
 23 -10 -2 54.04 6.03
 23 -10 -2 50.29 6.35
 24 -10 -2 356.26 15.84
 24 -10 2 341.41 16.34
 24 10 2 354.7 17.91
 24 -10 -2 368.29 15.87
 25 -10 2 2.73 2.16
 25 -10 -2 2.34 1.48
 25 10 2 0.47 1.66
 25 -10 -2 1.33 1.2
 26 -10 -2 173.55 11.31
 26 -10 2 193.97 12.47
 26 10 2 182.16 13.3
 26 -10 -2 185.8 12.02
 27 -10 -2 4.85 2.55
 27 -10 2 4.29 2.81
 27 10 2 1.48 3.23
 28 -10 -2 67.1 7.38
 28 10 2 64.06 8.37
 28 10 -2 64.81 9.88
 28 -10 2 64.04 7.43
 29 -10 -2 29.64 5.13
 29 10 -2 29.89 7.03
 30 -10 -2 3.09 2.43
 30 10 -2 2.12 3.4
 30 -10 2 0.98 2.63
 31 -10 2 3.66 1.99
 31 -10 -2 2.74 1.67
 31 10 -2 1.17 3.28
 32 -10 -2 105.31 9.41
 32 -10 2 118.63 10.39
 33 -10 -2 60.78 7.37
 33 -10 2 65.39 7.93
 34 -10 -2 195.86 12.84
 34 -10 2 212.89 13.75
 35 -10 2 11.9 3.82
 35 -10 -2 6.01 2.16
 36 -10 -2 7.26 2.84
 36 -10 2 7.76 2.97
 37 -10 -2 7.58 2.73
 37 -10 2 8.3 3.78
 38 -10 -2 14.6 3.55
 38 -10 2 13.82 3.66
 39 -10 -2 14.15 3.66
 39 -10 2 10.9 3.72
 40 -10 -2 46 5.93
 40 -10 2 55.07 7.05
 41 -10 2 9.01 3.5
 42 -10 2 118.91 9.34
 42 10 2 120.86 10.65
 42 10 -2 106.87 9.44
 43 10 -2 7.14 2.35
 43 10 2 10.09 3.93
 43 -10 2 12.38 3.48
 44 10 2 117.23 9.62
 44 10 -2 88.25 7.71
 44 -10 2 116.57 8.58
 45 10 2 5.79 1.96
 45 -10 2 6.49 2.19
 0 -11 -2 0.99 0.94
 -1 -11 -2 4.47 1.46
 1 -11 -2 3.26 1.18
 -2 -11 -2 0.45 0.97
 2 -11 -2 0.85 1
 2 11 -2 0.91 1.41
 3 -11 -2 5.37 1.64
 3 11 -2 1.83 1.22
 4 -11 -2 -1.26 1.14
 4 11 -2 2.27 1.89
 5 -11 -2 8 2.04
 5 11 -2 8.3 2.75
 6 11 -2 -0.67 1.45
 6 -11 -2 -0.42 0.81
 7 -11 -2 77.92 6.1
 7 11 -2 78.18 7.47
 8 -11 -2 0.75 1.04
 8 11 -2 2.14 1.13
 9 11 -2 109.3 9.34
 9 -11 -2 108.65 7.56
 9 11 2 91.33 8.48
 10 -11 -2 0.97 1.2
 10 11 2 2.24 1.23
 11 -11 -2 168.14 9.08
 11 11 2 134.17 10.27
 11 11 -2 162.44 11.14
 11 -11 2 137.59 6.8
 12 -11 -2 0.27 0.89
 12 -11 2 0.45 0.71
 12 11 2 -1.08 1.13
 12 11 -2 -2.19 1.87
 13 -11 -2 105.56 7.72
 13 11 2 91.67 8.68
 13 11 -2 108.53 9.4
 14 11 2 4.19 1.96
 14 -11 -2 4.54 1.84
 15 -11 2 25.21 4.83
 15 11 2 20.46 4.85
 15 -11 -2 26.35 4.11
 16 -11 2 -0.4 1.79
 16 -11 2 -1.43 2.14
 16 11 2 -4.41 1.96
 16 -11 -2 1.13 1.06
 17 -11 2 28.46 4.93
 17 -11 2 20.43 4.68
 17 11 2 19.27 4.93
 17 -11 -2 22.02 4.22
 18 -11 -2 -1.12 1.25
 18 -11 -2 -0.18 1.45
 18 -11 2 -0.94 1.45
 18 11 2 -1.65 2.19
 18 -11 2 -0.1 1.73
 19 -11 2 6.41 3.02
 19 -11 -2 4.96 2.77
 19 11 2 5.77 2.33
 19 -11 -2 5.66 2.26
 19 -11 2 10.31 3.38
 20 -11 -2 1.35 1.14
 20 -11 2 1.39 1.46
 20 -11 -2 0.82 1.97
 20 11 2 0.7 1.7
 20 -11 2 2.3 1.75
 21 -11 2 19.3 4.45
 21 11 2 25.1 5.48
 21 -11 -2 23.87 4.45
 21 -11 -2 22.79 4.73
 21 -11 2 24.21 5.32
 22 -11 2 -2.37 2.16
 22 -11 -2 0.46 0.98
 22 -11 2 -0.16 1.66
 22 11 2 3.71 2.63
 22 -11 -2 1.71 2.03
 23 -11 -2 46.96 6.86
 23 11 2 37.42 7.39
 23 -11 -2 45.36 6.22
 23 -11 2 40.19 6.51
 23 -11 2 30.27 5.63
 24 -11 -2 0.38 1.8
 24 -11 2 4.91 1.82
 24 -11 -2 1.12 1.19
 24 11 2 -0.63 2.23
 25 -11 2 16.57 4.58
 25 11 2 15.66 4.95
 25 -11 -2 8.39 3.07
 25 -11 -2 18.56 4.25
 26 11 2 0.19 1.91
 26 -11 -2 -1.55 1.81
 26 -11 2 0.58 1.78
 27 -11 -2 11.36 3.46
 27 11 2 10.55 4.13
 27 -11 2 11.62 4.13
 28 -11 -2 -1.59 2.2
 28 11 2 -2.78 2.37
 29 -11 2 13.29 3.87
 29 11 -2 9.98 4.48
 29 -11 -2 13.91 4.01
 30 -11 -2 -0.68 1.6
 30 11 -2 -0.68 2.45
 30 -11 2 -2.16 2.1
 31 -11 2 13.39 4.08
 31 -11 -2 15.69 4.12
 32 -11 -2 -1.27 1.74
 32 -11 2 0.91 2.17
 33 -11 2 54.91 7.78
 33 -11 -2 41.55 6.67
 34 -11 2 -0.32 1.9
 34 -11 -2 0.07 1.73
 35 -11 2 9.21 3.56
 35 -11 -2 10.87 3.39
 36 -11 -2 -1.29 1.58
 36 -11 2 2.68 2.25
 37 -11 2 1.95 1.98
 37 -11 -2 2.2 2.21
 38 -11 -2 2.08 1.45
 38 -11 2 -0.37 2.9
 39 -11 2 2.96 2.33
 39 -11 -2 2.27 1.99
 40 -11 2 -3.34 2.02
 41 -11 2 4.79 2.4
 42 -11 2 3.36 2.4
 42 11 -2 1.05 1.5
 43 -11 2 10.82 3.34
 43 11 2 8.93 3.83
 43 11 -2 5.91 3.35
 44 11 -2 -0.31 1.36
 44 11 2 0.62 1.53
 44 -11 2 2.38 1.85
 45 11 2 7.65 2.52
 0 -12 -2 10.24 2.06
 -1 -12 -2 2.73 1.48
 1 -12 -2 3.62 2.08
 2 -12 -2 183.29 8.48
 3 12 -2 5.58 2.54
 3 -12 -2 9.36 2.25
 4 -12 -2 267.23 10.21
 4 12 -2 291.79 13.16
 5 -12 -2 0.84 0.88
 5 12 -2 -0.02 1.18
 6 12 -2 31.86 4.54
 6 -12 -2 32.83 3.66
 7 12 2 0.78 1.27
 7 -12 -2 3.11 1.41
 7 12 -2 1.78 1.33
 8 -12 -2 282.51 10.73
 8 12 -2 271.79 13.24
 8 12 2 282.31 12.71
 9 -12 -2 3.21 1.54
 9 12 2 3.31 1.5
 9 12 -2 4.85 1.92
 10 12 2 494.63 16.84
 10 -12 -2 501.42 14.62
 10 12 -2 501.67 18.18
 11 -12 -2 5.39 2.05
 11 12 -2 5.62 2.5
 11 12 2 4 2.25
 12 -12 -2 50.64 4.96
 12 12 2 52.75 5.7
 12 12 -2 49.67 5.81
 13 12 -2 -0.27 1.48
 13 12 2 1.57 1.27
 13 -12 -2 0.43 1.06
 13 -12 2 -0.24 1.61
 14 -12 2 117.77 8.28
 14 -12 2 137.22 9.38
 14 12 2 126.69 9.02
 14 -12 -2 137.31 8.25
 15 -12 2 4.23 2.11
 15 12 2 1.87 1.74
 15 -12 2 6.15 2.55
 15 -12 -2 4.05 1.6
 16 -12 2 361.48 14.79
 16 -12 2 382.35 16.11
 16 -12 -2 391.98 14.48
 16 -12 -2 335.28 13.98
 16 12 2 378.26 16.04
 17 -12 2 5.18 1.88
 17 -12 -2 4.11 1.71
 17 -12 -2 5.92 1.96
 17 -12 2 4.01 2.54
 18 -12 -2 382.61 15.32
 18 -12 2 398.3 16.01
 18 -12 -2 401.56 15.29
 18 12 2 397.7 17.37
 18 -12 2 405.22 16.91
 19 -12 -2 16.26 3.51
 19 -12 2 17.98 3.54
 19 12 2 20.58 4.48
 19 -12 2 17.75 3.91
 19 -12 -2 22.24 3.74
 20 -12 -2 115.02 8.72
 20 -12 2 110.74 8.82
 20 12 2 111.16 9.59
 20 -12 2 106.96 8.84
 20 -12 -2 109.99 8.26
 21 -12 2 2.56 2.29
 21 12 2 1.11 2.23
 21 -12 -2 5.09 2.87
 21 -12 2 4.67 2.83
 21 -12 -2 2.56 1.84
 22 -12 -2 127.35 9.3
 22 -12 -2 132.72 9.68
 22 -12 2 119.18 9.69
 22 12 2 124.58 10.91
 22 -12 2 123.3 9.45
 23 -12 2 6.36 2.43
 23 -12 -2 6.09 2.82
 23 -12 2 1.85 1.56
 23 -12 -2 5.2 2.1
 23 12 2 4.18 2.34
 24 -12 -2 203.89 12.11
 24 -12 2 231.92 13.6
 24 12 2 211.81 14.72
 24 -12 -2 226.21 13.05
 25 -12 -2 3.02 1.79
 25 12 2 2.4 2.45
 25 -12 2 2.91 2.19
 26 -12 -2 91.04 8.66
 26 -12 2 99.04 9.24
 26 12 2 92.93 10.03
 27 -12 2 8.98 6.37
 27 -12 -2 5.59 2.36
 27 12 2 5.19 3.21
 28 12 2 8.5 4.18
 28 -12 2 9.38 3.12
 28 -12 -2 8.49 3.03
 29 -12 -2 9.92 3.18
 29 12 -2 8.93 3.89
 29 -12 2 14.6 4.11
 30 -12 -2 72.38 7.89
 30 -12 2 72.19 8.17
 30 12 -2 65.42 10.07
 31 -12 2 11.86 3.63
 31 -12 -2 17.69 4.92
 32 -12 -2 361.74 16.96
 32 -12 2 378.77 18.26
 33 -12 2 -0.77 2.2
 33 -12 -2 4.64 2.54
 34 -12 -2 91.18 8.61
 34 -12 2 100.96 9.54
 35 -12 -2 1.45 1.98
 35 -12 2 -0.38 2.43
 36 -12 -2 107.34 9.3
 36 -12 2 122.98 10.36
 37 -12 2 6.74 3.31
 37 -12 -2 6.73 2.24
 38 -12 2 1.32 1.98
 38 -12 -2 1.28 1.61
 39 -12 2 2.25 2.68
 39 -12 -2 2.25 2.32
 40 -12 2 44.06 5.9
 41 -12 2 -0.77 1.34
 42 -12 2 97.38 8.32
 43 12 -2 1.07 1.34
 43 12 2 1.21 1.84
 43 -12 2 -0.47 1.45
 44 12 2 44.61 5.92
 44 -12 2 44.71 5.11
 0 -13 -2 1.4 1.1
 1 -13 -2 82.47 6.73
 2 -13 -2 -0.72 1.1
 3 -13 -2 102.47 7.25
 4 -13 -2 6.82 2.29
 4 13 -2 3.4 2.24
 5 13 -2 26.51 5.36
 5 -13 -2 24.57 3.89
 5 13 2 23.56 4.53
 6 -13 -2 0.64 0.96
 6 13 -2 -0.33 1.28
 6 13 2 1.42 1.4
 7 13 2 22.82 4.43
 7 13 -2 24.83 5.13
 7 -13 -2 21.98 3.6
 8 13 2 -0.64 1.33
 8 13 -2 3.07 2.4
 8 -13 -2 4.74 1.62
 -8 13 2 -1.87 1.58
 9 -13 -2 2.6 1.7
 9 13 2 2.5 1.88
 9 13 -2 4.45 2.47
 10 -13 -2 1.55 1.23
 10 13 -2 2.72 2.35
 10 13 2 1.5 1.49
 11 -13 -2 6.42 2.13
 11 -13 -2 10.34 3.27
 11 13 -2 4.23 2.36
 11 -13 2 9.77 3.3
 11 13 2 8.31 2.97
 11 -13 2 9.15 2.84
 12 -13 2 0.07 1.1
 12 13 -2 2.91 2.36
 12 -13 2 2.79 1.77
 12 -13 -2 3.55 2.4
 12 13 2 2.03 1.49
 12 -13 -2 -0.27 0.93
 13 13 2 7.3 2.7
 13 -13 2 7.88 3.06
 13 -13 -2 7.02 2.38
 13 -13 2 4.59 2.29
 14 -13 -2 1.76 1.5
 14 -13 2 0.42 1.94
 14 -13 2 -0.59 2.19
 14 -13 -2 0.36 1.56
 14 13 2 2.87 2.22
 14 -13 2 -0.4 1.84
 15 -13 -2 9.92 3.17
 15 13 2 14.29 3.7
 15 -13 2 13.89 3.86
 15 -13 -2 12.22 2.98
 15 -13 2 8.13 3.12
 16 -13 2 -0.94 1.26
 16 -13 -2 0.23 0.98
 16 13 2 -0.66 1.63
 16 -13 2 -0.23 1.42
 16 -13 -2 -1.31 1.71
 17 13 2 25.1 5.29
 17 -13 -2 25.19 5.06
 17 -13 2 24.12 4.81
 17 -13 2 21.73 5.23
 17 -13 -2 24.16 4.61
 18 13 2 -0.07 1.76
 18 -13 2 -1.01 1.54
 18 -13 -2 -1.34 1.99
 18 -13 2 0.65 1.55
 18 -13 -2 -1.83 1.69
 19 -13 -2 8.29 3.12
 19 -13 2 7.49 3.04
 19 -13 -2 7.5 2.81
 19 13 2 9.21 3.58
 19 -13 2 9.83 3.38
 20 13 2 0.56 1.74
 20 -13 -2 2.91 2.81
 20 -13 2 -1.07 1.88
 20 -13 -2 0.53 1.32
 20 -13 2 0.56 1.69
 21 -13 2 4.8 2.5
 21 13 2 4.28 2.81
 21 -13 2 4.03 2.82
 21 -13 -2 5.73 2.57
 21 -13 -2 3.1 2.42
 22 -13 -2 -0.89 1.4
 22 13 2 -2.89 2.76
 22 -13 -2 1.21 1.69
 22 -13 2 0.18 1.74
 22 -13 2 -1.86 1.71
 23 13 2 10.74 4.49
 23 -13 2 8.91 3.26
 23 -13 2 12.66 3.8
 23 -13 -2 11.29 3.96
 23 -13 -2 6.73 2.56
 24 -13 -2 1.49 2.49
 24 -13 2 1.66 2.03
 24 13 2 -0.34 1.74
 25 -13 2 9.11 3.33
 25 13 2 7.29 4.1
 25 -13 -2 15.38 4.29
 26 -13 2 1.16 2.19
 26 -13 -2 2.12 2.12
 26 13 2 3.14 2.96
 27 13 2 9.28 4.65
 27 -13 -2 15.56 4.39
 27 -13 2 11.07 3.57
 28 -13 2 0.04 1.8
 28 13 2 5.48 3.14
 28 -13 -2 0.96 1.95
 29 -13 -2 13.65 4.2
 29 -13 2 17.65 4.75
 30 -13 -2 -0.99 1.72
 30 -13 2 0.08 2.01
 31 -13 -2 10.08 3.63
 31 -13 2 16.89 4.45
 32 -13 -2 1.46 2.16
 32 -13 2 1.33 2.48
 33 -13 -2 3.79 1.99
 33 -13 2 9.44 3.31
 34 -13 -2 -1.55 1.84
 34 -13 2 3.04 2.21
 35 -13 -2 12.63 3.91
 35 -13 2 15.39 4.37
 36 -13 2 1.22 1.56
 36 -13 -2 0.19 2.1
 37 -13 -2 14.37 4.01
 37 -13 2 15.68 4.37
 38 -13 -2 1.74 1.8
 38 -13 2 -0.38 1.45
 39 -13 2 15.37 3.8
 40 -13 2 0.57 2.13
 41 -13 2 9.39 3.34
 42 -13 2 1.88 1.2
 43 13 -2 3.17 2.21
 43 -13 2 8.25 2.58
 43 13 2 6.23 3.44
 44 13 2 -1.75 1.92
 0 14 2 668.47 24.04
 -1 14 2 9.47 3.31
 1 14 2 10.2 3.47
 1 -14 -2 9.37 2.26
 2 -14 -2 676.89 17.72
 -2 14 2 683.7 24.41
 2 14 2 670.85 22.68
 -3 14 2 1.01 1.95
 3 -14 -2 3.15 1.41
 3 14 2 2.33 2.45
 -4 14 2 136.13 10.82
 4 -14 -2 131.22 7.6
 4 14 2 125.62 9.54
 5 14 2 12.81 3.49
 5 14 -2 13.56 3.74
 6 14 2 35.46 5.3
 -6 14 2 47.17 6.6
 6 14 -2 40.94 5.84
 6 -14 -2 43.09 4.49
 -7 14 2 2.66 2.61
 7 -14 2 1.77 1.66
 7 14 2 3.65 2.02
 7 -14 -2 3.11 1.76
 7 14 -2 4.46 2.51
 7 -14 2 4.21 2.06
 8 -14 2 120.47 8.56
 8 14 2 120.78 9.44
 8 -14 -2 121.84 9.15
 8 -14 -2 120.16 7.54
 8 14 -2 122.83 10.06
 8 -14 2 114.54 7.74
 9 -14 -2 5.77 1.98
 9 -14 2 6.77 2.32
 9 14 2 4.66 2.28
 9 14 -2 1.55 1.53
 9 -14 -2 6.17 1.92
 9 -14 2 1.41 1.86
 10 -14 2 7.5 2.65
 10 -14 -2 11.14 3.84
 10 -14 -2 7.53 2.17
 10 14 -2 8.5 3.09
 10 -14 2 3.78 1.56
 10 14 2 8.39 2.94
 10 -14 2 6.52 2.03
 11 -14 -2 0.11 1.1
 11 -14 2 -2.14 1.9
 11 -14 2 -0.76 2.27
 11 14 2 -1.65 1.58
 11 -14 -2 0.31 2.05
 11 -14 2 -0.72 1.53
 12 14 2 10.86 3.04
 12 -14 2 11.19 3.61
 12 -14 -2 9.14 2.82
 12 -14 -2 15.71 3.73
 12 -14 2 8.59 3.02
 12 -14 2 5.09 2.11
 12 -14 -2 9.94 2.22
 13 -14 2 2.3 2.15
 13 14 2 1.81 2.12
 13 -14 -2 -0.75 1.27
 13 -14 2 2.62 2.26
 13 -14 2 5.28 2.42
 13 -14 -2 2.49 1.5
 14 14 2 110.72 9.01
 14 -14 2 107.39 9.15
 14 -14 2 104.62 8.21
 14 -14 -2 108.92 8.38
 14 -14 -2 122.49 8.13
 14 -14 2 120.43 8.95
 15 -14 -2 15.12 3.14
 15 -14 2 15.23 3.35
 15 -14 2 22.42 4.86
 15 -14 2 17.91 4.37
 15 14 2 17.57 3.99
 15 -14 -2 16.57 3.7
 16 -14 -2 518.39 17.79
 16 14 2 498.74 19.92
 16 -14 2 475.25 17.65
 16 -14 2 518.19 19.44
 16 -14 -2 499.76 18.28
 17 14 2 1.93 1.78
 17 -14 2 1.78 2.63
 17 -14 -2 2.52 1.21
 17 -14 2 3.27 1.72
 17 -14 -2 3.58 1.79
 18 -14 -2 725.77 22.58
 18 -14 -2 765.53 22.44
 18 14 2 695.9 24.51
 18 -14 2 744.42 23.83
 18 -14 2 734.71 22.69
 19 -14 2 10.5 3.93
 19 14 2 5.76 3.66
 19 -14 2 6.27 2.79
 19 -14 -2 8.54 3.11
 19 -14 -2 7.44 2.57
 20 -14 2 10.88 2.93
 20 -14 2 9.77 3.02
 20 -14 -2 8.61 2.52
 20 14 2 8.15 3.41
 20 -14 -2 9.14 2.55
 21 -14 2 2.06 2.36
 21 -14 -2 4.61 2.62
 21 -14 2 0.98 2.01
 21 -14 -2 2.05 1.37
 21 14 2 4.69 2.87
 22 -14 2 20.12 4.48
 22 14 2 17.33 4.51
 22 -14 -2 19.29 4.73
 22 -14 -2 12.31 3.27
 22 -14 2 14.37 3.42
 23 14 2 2.79 1.76
 23 -14 2 -1.93 1.9
 23 -14 -2 1.89 1.5
 24 14 2 52.69 7.46
 24 -14 -2 60.01 7.15
 24 -14 2 59.85 7.29
 25 14 2 8 3.92
 25 -14 -2 11.54 4.01
 26 -14 2 52.02 6.87
 26 14 2 42.7 7.19
 26 -14 -2 50.38 6.79
 27 -14 2 8.17 3.01
 27 -14 -2 6.6 2.8
 27 14 2 5.49 3.44
 28 14 2 4.47 3.89
 28 -14 2 1.87 2.26
 28 -14 -2 1.13 1.63
 29 -14 -2 0.94 1.82
 29 -14 2 0.73 1.74
 30 -14 2 232.64 14.44
 30 -14 -2 216.92 13.27
 31 -14 2 -2.99 2.54
 31 -14 -2 4.45 2.68
 32 -14 2 167.7 12.21
 32 -14 -2 161.16 11.31
 33 -14 -2 4.42 2.83
 33 -14 2 2.33 2.29
 34 -14 -2 378.22 17.09
 34 -14 2 390.88 18.69
 35 -14 2 -0.05 1.68
 35 -14 -2 -2.3 1.93
 36 -14 2 92.76 9.11
 36 -14 -2 84.02 7.9
 37 -14 2 10.34 3.38
 37 -14 -2 14.1 3.44
 38 -14 2 16.83 3.89
 39 -14 2 1.73 2.35
 40 -14 2 22.52 4.42
 41 -14 2 4.12 1.76
 42 -14 2 62.74 6.29
 43 14 2 -6.41 3.47
 43 -14 2 4.2 1.81
 0 15 2 -3.09 2.86
 0 -15 2 -0.24 1.54
 -1 15 2 268.19 18.66
 1 15 2 262.53 18.35
 1 -15 2 343.31 14.68
 -1 -15 2 357.11 14.69
 2 -15 2 1.56 1.95
 2 -15 -2 0.86 2.34
 2 15 2 -0.83 1.52
 -2 15 2 -0.35 2.44
 2 -15 -2 -1.09 1.64
 -2 -15 2 -1.33 1.59
 3 -15 2 263.31 12.83
 -3 15 2 197.35 15.87
 3 15 2 197.03 14.79
 3 -15 -2 219.35 13.51
 3 -15 -2 206.69 11.55
 -3 -15 2 241.24 12.36
 3 -15 2 199.44 12.83
 4 -15 2 -2.19 1.79
 -4 -15 2 1.7 1.74
 4 15 2 0.98 2.24
 4 -15 -2 1.73 1.98
 4 -15 -2 0.01 2.57
 4 -15 2 2.25 1.75
 4 -15 2 1.34 1.87
 -4 15 2 -1.36 2.87
 5 15 2 327.42 18.44
 5 -15 2 333.76 16.22
 5 -15 2 339.92 17.14
 -5 15 2 295.85 19.14
 5 -15 2 345.32 15.16
 5 -15 -2 350.01 14.22
 6 -15 2 1.2 1.34
 -6 15 2 -1.85 2.37
 6 -15 -2 -0.16 2.22
 6 15 2 0.54 1.85
 6 -15 -2 -0.31 1.25
 6 -15 2 2.59 2.41
 6 -15 2 0.63 2.1
 7 -15 2 127.14 9.48
 7 -15 -2 119.5 9.17
 7 15 2 120.77 11.36
 7 -15 2 146.07 10.84
 7 -15 -2 117.2 10.77
 7 -15 2 126.57 10.57
 8 -15 2 4.77 2.44
 8 -15 -2 0.94 2.33
 8 15 2 -0.02 1.57
 8 -15 -2 -0.09 1.73
 8 -15 2 1.54 1.31
 8 -15 -2 0.94 0.87
 8 -15 2 2.48 1.81
 9 -15 2 154.43 11.43
 9 -15 -2 147.85 11.71
 9 -15 2 171.94 12.54
 9 15 2 142.36 11.79
 9 -15 -2 121.22 8.9
 9 -15 2 178.84 10.81
 9 -15 -2 136.29 10.13
 10 -15 2 3.38 1.53
 10 -15 -2 3.05 2
 10 -15 -2 0.05 1.42
 10 -15 2 5.32 2.9
 10 15 2 -0.52 1.82
 10 -15 2 0.34 1.77
 10 -15 -2 3.36 2.33
 11 -15 2 126.88 11.1
 11 -15 -2 164.33 12.03
 11 -15 -2 145.07 9.39
 11 -15 2 129.07 9.69
 11 15 2 135.74 11.27
 11 -15 2 116.45 10.59
 11 -15 -2 120.3 9.96
 12 15 2 -0.47 1.34
 12 -15 -2 -0.68 1.32
 12 -15 -2 2.57 2.62
 12 -15 2 -0.27 1.52
 12 -15 2 1.34 2.57
 12 -15 2 1.36 2.29
 12 -15 -2 -0.72 1.13
 13 -15 -2 146.62 11.02
 13 -15 2 166.87 11.26
 13 -15 2 152.52 11.61
 13 15 2 149.45 12.12
 13 -15 2 174.09 13.15
 13 -15 -2 162.7 10.34
 14 -15 -2 0.65 1.47
 14 -15 2 2.11 2.55
 14 -15 -2 -2.12 1.66
 14 -15 2 -2.28 2.67
 14 15 2 0.78 1.68
 14 -15 2 -2.45 1.74
 15 15 2 151.15 12.9
 15 -15 -2 175.57 12.26
 15 -15 2 178.73 13.7
 15 -15 -2 182.09 11.23
 15 -15 2 181.74 12.48
 15 -15 2 181.73 12.77
 16 -15 2 4.87 2.82
 16 -15 -2 4.28 2.41
 16 15 2 2.08 2.05
 16 -15 -2 1.08 1.56
 16 -15 2 2.88 2.94
 17 -15 -2 88.86 8.5
 17 -15 2 108.78 9.86
 17 -15 2 97.58 9.97
 17 -15 -2 105.68 9.58
 17 15 2 86.97 10.28
 18 -15 2 -0.85 2.4
 18 -15 -2 -2.15 2.35
 18 15 2 -1.31 2.08
 18 -15 -2 0.46 1.52
 18 -15 2 -3 2.6
 19 -15 -2 33.88 5.39
 19 -15 2 35.62 6.19
 19 -15 -2 44.47 6.65
 19 15 2 36.17 6.69
 19 -15 2 32.75 6.33
 20 -15 2 -1.24 2.02
 20 -15 -2 1.5 1.18
 20 15 2 -0.94 2.62
 20 -15 2 2.07 2.39
 20 -15 -2 1.39 2.12
 21 -15 2 53.05 7.57
 21 -15 -2 67.82 8.15
 21 15 2 50.31 8.14
 21 -15 2 54.31 7.72
 22 -15 2 0.68 1.66
 22 -15 -2 4.18 2.87
 22 15 2 1.6 2.26
 22 -15 2 2.68 2.68
 23 -15 -2 102.93 10.44
 23 15 2 106.39 12.47
 23 -15 2 118.6 10.91
 24 -15 -2 -0.98 1.78
 24 15 2 3.39 2.84
 25 -15 2 115.94 11.19
 25 -15 -2 117.95 10.73
 26 -15 -2 -0.03 1.76
 26 15 2 -4.39 3.11
 27 -15 -2 132.1 11.23
 27 -15 2 138.18 12.29
 28 -15 -2 1 2.36
 28 -15 2 -2.76 2.41
 29 -15 2 69.39 8.57
 29 -15 -2 56.62 7.78
 30 -15 -2 7.28 3.27
 30 -15 2 1.99 1.69
 31 -15 -2 61.11 7.85
 31 -15 2 81.53 9.14
 32 -15 2 0.44 1.51
 32 -15 -2 -1.82 2.02
 33 -15 -2 90.39 9.1
 33 -15 2 108.7 10.85
 34 -15 2 -1.84 2.07
 34 -15 -2 -0.92 1.33
 35 -15 2 70.6 8.56
 35 -15 -2 56.06 7.08
 36 -15 2 -2.01 1.99
 36 -15 -2 2.58 2.33
 37 -15 2 68.83 8.14
 38 -15 2 2.47 1.79
 39 -15 2 33.55 5.38
 40 -15 2 1.1 1.8
 41 -15 2 40.06 5.51
 42 -15 2 5.04 1.85
 0 16 2 807.03 30.03
 0 -16 -2 865.75 24.38
 0 -16 2 796.13 21.13
 0 -16 2 769.43 22.22
 0 -16 -2 808.24 23.85
 -1 -16 -2 6.67 2.76
 -1 -16 2 6.78 2.66
 -1 16 2 3.59 2.38
 1 -16 2 2.56 1.89
 -1 -16 2 4.38 1.97
 1 -16 -2 2.17 2.29
 1 -16 -2 5.12 1.83
 1 16 2 2.53 1.91
 1 -16 2 6.97 2.3
 2 -16 -2 412.12 16.77
 -2 -16 2 423.87 15.41
 2 16 2 391.52 20.24
 -2 16 2 397 21.16
 -2 -16 -2 397.74 16.6
 2 -16 -2 408.48 16.63
 2 -16 2 382.94 14.61
 2 -16 2 381.23 15.6
 -2 -16 2 344.98 14.81
 3 -16 2 5.37 2.49
 3 -16 2 4.57 2.14
 3 -16 -2 2.72 1.83
 -3 -16 2 2.53 2.44
 -3 -16 2 6.51 2.3
 3 -16 2 6.29 2.61
 -3 16 2 -0.13 2.4
 3 -16 -2 4.66 2.1
 3 -16 -2 4.94 2.63
 4 -16 -2 7.01 2.74
 4 -16 2 4.24 1.74
 4 16 2 4.49 2.98
 -4 16 2 6 2.31
 4 -16 2 4.07 2.38
 4 -16 2 2.24 1.69
 4 -16 -2 9.01 2.89
 -4 -16 2 7.4 2.29
 4 -16 -2 4.52 2.24
 5 -16 -2 5.82 1.89
 5 -16 2 -0.1 1.53
 5 -16 2 3.17 2.15
 5 -16 2 2 1.46
 5 -16 -2 1.63 1.75
 5 -16 -2 0.29 1.74
 5 16 2 6.07 2.99
 6 -16 2 15.75 3.44
 6 -16 2 17.99 3.57
 6 -16 -2 29.83 5.16
 6 16 2 30.34 6.21
 6 -16 2 16.52 3.81
 6 -16 -2 37.06 5.12
 6 -16 -2 22.52 3.81
 7 -16 2 0.41 1.34
 7 -16 -2 0.46 1.43
 7 16 2 -0.88 2.11
 7 -16 -2 -0.55 1.07
 7 -16 -2 -3.15 2.62
 7 -16 2 2.29 2.1
 7 -16 2 -2.43 2.67
 8 -16 2 35.44 4.49
 8 -16 -2 44.37 5.23
 8 16 2 56.17 7.17
 8 -16 -2 56.44 7.06
 8 -16 -2 63.56 6.52
 8 -16 2 35.6 5.14
 8 -16 2 35.47 5.45
 9 -16 2 -3.86 1.96
 9 -16 2 1.38 1.54
 9 -16 -2 4.24 2.07
 9 -16 -2 -2.94 2.34
 9 -16 -2 4.21 2.52
 9 -16 2 2.21 2.02
 9 16 2 0.06 1.72
 10 -16 2 72.29 7.23
 10 -16 -2 106.52 9.03
 10 -16 -2 111.39 8.27
 10 -16 2 77.89 7.92
 10 16 2 110.83 10.15
 10 -16 2 69.62 6.45
 10 -16 -2 112.69 8.71
 11 16 2 1.72 1.68
 11 -16 2 5.17 2.37
 11 -16 -2 6.57 2.42
 11 -16 -2 5.59 2.12
 11 -16 2 1.35 1.58
 11 -16 2 9.89 4.08
 11 -16 -2 4.33 1.82
 12 -16 2 5.24 2.66
 12 16 2 18.59 4.34
 12 -16 -2 20.91 5.28
 12 -16 2 5.66 2.81
 12 -16 -2 20.3 4.51
 12 -16 2 8.37 2.96
 12 -16 -2 13.82 3.23
 13 -16 2 10.29 3.14
 13 -16 -2 16.31 4.28
 13 -16 -2 12.65 2.82
 13 -16 2 6.63 3.08
 13 16 2 11.69 3.51
 13 -16 2 8.03 3.11
 14 -16 2 71.42 7.23
 14 16 2 60.31 7.4
 14 -16 -2 70.02 6.96
 14 -16 -2 72.42 6.83
 14 -16 2 77.18 8.2
 14 -16 2 67.9 7.51
 15 -16 2 1.22 1.54
 15 -16 2 2.84 2.16
 15 -16 -2 1.18 1.54
 15 -16 2 2.57 5.3
 15 16 2 0.27 1.78
 15 -16 -2 -0.82 1.21
 16 -16 -2 264.01 13.83
 16 -16 2 276.01 14.24
 16 -16 -2 262.81 13.65
 16 16 2 251.63 15.34
 16 -16 2 267.09 13.99
 17 -16 2 17.9 4.22
 17 -16 -2 20.84 4.5
 17 16 2 15.21 3.98
 17 -16 2 18.12 3.77
 17 -16 -2 17.14 3.78
 18 -16 -2 117.37 9.31
 18 -16 -2 107.94 9.05
 18 16 2 100.03 10.23
 18 -16 2 109.73 9.18
 18 -16 2 123.09 9.75
 19 16 2 0.89 1.79
 19 -16 2 -1.71 2.45
 19 -16 -2 -1.67 1.57
 19 -16 -2 0.92 2.13
 19 -16 2 1.56 1.74
 20 -16 -2 146.07 10.57
 20 16 2 121.13 11.35
 20 -16 2 133.28 10.39
 20 -16 2 133.71 10.48
 21 -16 -2 6.53 2.95
 21 -16 2 5.52 3.17
 21 -16 2 2.06 1.73
 21 16 2 4.42 2.77
 22 -16 -2 14.61 3.64
 22 16 2 14.57 4.11
 22 -16 2 5.55 2.73
 23 16 2 9.5 3.6
 23 -16 -2 15.13 3.47
 24 -16 2 115.06 11.09
 24 -16 -2 139.43 10.78
 24 16 2 128.54 12.65
 25 -16 -2 2.39 1.53
 25 16 2 1.8 1.91
 25 -16 2 2.71 2.34
 26 -16 -2 129.51 10.54
 26 16 2 117.25 12.72
 26 -16 2 132.54 11.03
 27 -16 2 19.26 4.39
 27 -16 -2 12.38 3.69
 28 -16 2 13.34 4.06
 28 -16 -2 12.69 3.93
 29 -16 -2 10 3.37
 29 -16 2 6.39 2.92
 30 -16 -2 19.01 4.2
 30 -16 2 19.23 4.27
 31 -16 -2 11.04 3.31
 31 -16 2 10.36 3
 32 -16 2 315.56 16.78
 32 -16 -2 287.4 14.98
 33 -16 2 8.02 2.98
 33 -16 -2 11.51 3.3
 34 -16 -2 155.84 10.57
 34 -16 2 181.04 12.31
 35 -16 -2 15.92 3.75
 35 -16 2 14.39 3.94
 36 -16 2 101.67 9.17
 37 -16 2 -0.82 2.31
 38 -16 2 13.03 3.3
 39 -16 2 6.49 2.61
 40 -16 2 20.61 3.83
 41 -16 2 7.92 2.36
 0 17 2 0.94 2.89
 0 -17 -2 -2.44 2.36
 0 -17 -2 4.7 1.98
 0 -17 2 1.16 1.58
 0 -17 2 1.8 2.03
 -1 17 2 80.27 11.27
 1 -17 2 76.18 8.13
 1 17 2 67.8 11.15
 1 -17 -2 91.52 9.08
 1 -17 -2 88.54 9.53
 1 -17 2 85.85 8.12
 -1 -17 2 75.43 8.25
 -1 -17 2 79.55 7.78
 -1 -17 -2 82.58 9.22
 -2 -17 2 -1.17 1.8
 2 -17 2 1.43 2.03
 2 -17 -2 0.11 1.96
 -2 -17 -2 -0.11 1.95
 2 17 2 0.86 2.96
 -2 17 2 1.22 2.02
 -2 -17 2 -0.28 1.43
 2 -17 2 1.93 1.67
 2 -17 -2 0.96 2.04
 -3 -17 2 206.87 11.91
 -3 -17 -2 170.46 12.55
 3 -17 2 171.87 10.86
 3 17 2 159.56 15.37
 -3 17 2 139.99 15.12
 3 -17 -2 187.88 13.73
 3 -17 2 168.63 12.08
 -3 -17 2 140.43 11.42
 3 -17 -2 191.2 12.26
 3 -17 2 175.24 12.62
 -4 17 2 -1.89 3.12
 4 -17 2 0.24 2.04
 4 -17 -2 3.27 2.47
 4 -17 2 2.13 1.67
 4 17 2 -1.72 1.88
 4 -17 2 -0.26 1.32
 -4 -17 2 -0.85 2.1
 4 -17 -2 -6.77 3.46
 5 -17 2 168.7 11.77
 5 -17 -2 173.5 11.09
 5 17 2 164.54 15.47
 5 -17 2 161.6 10.9
 5 -17 -2 174.16 13.34
 5 -17 2 189.9 12.83
 -5 -17 2 137.04 11.01
 6 -17 2 0.76 1.58
 6 17 2 -4.78 2.59
 6 -17 2 0.69 1.9
 6 -17 -2 0.64 2.26
 6 -17 -2 -1.16 2.86
 6 -17 -2 -0.08 2.94
 6 -17 2 -1.16 1.75
 7 -17 -2 259.9 14.5
 7 -17 2 235.54 14.06
 7 -17 -2 229.51 15.37
 7 -17 2 291.51 16.12
 7 17 2 245.01 17.4
 7 -17 2 266.62 13.41
 7 -17 -2 261.83 13.33
 8 -17 -2 2.93 3.38
 8 -17 2 -2.09 2.03
 8 17 2 0.75 1.83
 8 -17 -2 -0.81 2.27
 8 -17 2 2.07 3.25
 8 -17 -2 5.14 3.24
 8 -17 2 1.48 2.6
 9 -17 2 221.16 13.55
 9 17 2 240.27 16.35
 9 -17 2 254.11 16.35
 9 -17 -2 246.5 15.93
 9 -17 2 225.4 12.93
 9 -17 -2 214.79 12.9
 9 -17 -2 239.94 13.49
 10 -17 2 -1.67 1.98
 10 -17 -2 6.56 2.77
 10 17 2 -1.07 1.75
 10 -17 2 -0.3 1.72
 10 -17 -2 3.2 2.93
 10 -17 2 -0.08 1.49
 10 -17 -2 0.13 2.49
 11 -17 2 186.86 14.23
 11 17 2 179.82 14.67
 11 -17 -2 196.17 12.05
 11 -17 -2 233.48 15.2
 11 -17 -2 187.7 12.58
 11 -17 2 177.49 12.89
 11 -17 2 208.88 12.27
 12 -17 -2 -0.72 2.22
 12 -17 2 7.35 3.63
 12 17 2 -3.9 2.86
 12 -17 2 -1.08 1.55
 12 -17 -2 0.05 1.7
 12 -17 -2 2.29 2.64
 12 -17 2 0.34 2.1
 13 -17 2 156.58 11.42
 13 -17 -2 146.28 10.63
 13 17 2 157.68 13.35
 13 -17 2 151.87 12.27
 13 -17 2 153.94 12.82
 13 -17 -2 176.44 12.11
 14 -17 2 3.03 2.99
 14 -17 -2 1.21 1.89
 14 -17 -2 -1.87 1.92
 14 -17 2 -2.1 1.85
 14 17 2 -0.59 1.81
 15 -17 -2 97.7 9.27
 15 17 2 106.85 11.32
 15 -17 2 109.8 11.08
 15 -17 2 105.93 10.67
 15 -17 -2 110 9.72
 15 -17 2 122 10.34
 16 -17 2 1.99 2.06
 16 17 2 -4.1 2.91
 16 -17 -2 1.23 2.18
 16 -17 2 0.76 1.84
 17 -17 -2 43.11 6.22
 17 -17 2 52.38 7.39
 17 -17 2 50.98 6.83
 17 17 2 55.97 8.56
 17 -17 -2 44.95 6.51
 18 -17 2 0.52 1.94
 18 -17 -2 1.75 1.56
 18 -17 2 -0.46 2.3
 18 -17 -2 -0.11 1.13
 18 17 2 2.96 2.84
 19 -17 -2 39.87 5.96
 19 -17 2 36.48 6.53
 19 17 2 33.28 6.46
 19 -17 2 40.53 6.83
 20 -17 2 3.9 2.52
 20 -17 -2 -1.5 2.45
 20 -17 2 -4.61 2.77
 20 17 2 -1.08 2.5
 21 -17 -2 64.06 7.53
 21 17 2 48.7 8.58
 22 -17 -2 0.64 1.62
 22 17 2 4.31 2.66
 22 -17 2 4.67 2.23
 23 17 2 66.82 10.08
 23 -17 -2 77.35 8.59
 23 -17 2 55.37 7.89
 24 -17 -2 -0.38 1.53
 24 17 2 -2.6 3.13
 24 -17 2 2.99 1.75
 25 -17 2 153.99 12.92
 25 -17 -2 156.95 12.23
 26 -17 -2 -0.33 2.01
 26 -17 2 2.98 2.64
 27 -17 2 81.91 9.11
 27 -17 -2 74.09 8.26
 28 -17 2 2.86 2.19
 28 -17 -2 3.36 2.33
 29 -17 2 88.11 9.64
 29 -17 -2 76.56 8.39
 30 -17 -2 5.78 2.6
 30 -17 2 4.98 2.37
 31 -17 2 131.11 11.94
 31 -17 -2 108.05 9.65
 32 -17 2 -0.2 2.29
 32 -17 -2 0.5 1.71
 33 -17 -2 79.41 8.08
 33 -17 2 98.49 10
 34 -17 2 -0.99 1.9
 34 -17 -2 3.12 2.1
 35 -17 2 103.74 9.75
 36 -17 2 -0.13 1.66
 37 -17 2 40.34 5.96
 38 -17 2 1.42 1.91
 39 -17 2 27.75 4.38
 40 -17 2 2.75 1.74
 0 -18 2 390.13 16.47
 0 -18 -2 363.48 17.15
 0 -18 2 371.09 15.25
 0 18 2 393.18 23.51
 -1 -18 2 3.12 2.08
 -1 -18 -2 -2.45 3.22
 -1 18 2 -1.6 2.06
 1 -18 2 0.63 1.53
 1 18 2 -0.25 3.32
 1 -18 -2 5.29 2.33
 1 -18 -2 0.47 2.7
 -1 -18 2 3.79 2.19
 1 -18 2 -1.58 2.11
 -2 -18 2 353.62 15.21
 2 18 2 378.18 23.14
 2 -18 -2 372.91 17.42
 2 -18 -2 420.88 17.22
 -2 -18 -2 385.64 17.46
 2 -18 2 363.33 15.05
 2 -18 2 377.91 16.34
 -2 -18 2 364.94 16.06
 -2 18 2 353.3 22.4
 2 -18 2 387.95 17.27
 -3 18 2 -4.48 3.34
 3 -18 -2 5.81 2.89
 3 18 2 7.51 3.66
 3 -18 -2 3.43 2.48
 3 -18 2 0.2 2.15
 -3 -18 -2 2.9 1.86
 -3 -18 2 -0.43 1.68
 3 -18 2 0.49 2.28
 3 -18 2 2.83 2.14
 4 -18 -2 26.59 5.13
 4 18 2 27.78 6.24
 4 -18 -2 39.1 5.77
 -4 -18 -2 31.84 5.24
 4 -18 2 19.07 5.15
 4 -18 2 30.04 4.55
 -4 -18 2 25.67 4.57
 4 -18 2 29.94 4.58
 5 -18 2 0.79 1.54
 5 -18 2 3.05 2.85
 5 -18 2 10.19 3.04
 5 18 2 5.96 3.57
 5 -18 -2 4.21 1.71
 5 -18 -2 5.85 3.58
 -5 -18 2 5.38 2.81
 6 18 2 167.06 14.14
 6 -18 -2 163 12.06
 6 -18 2 164.29 11.43
 6 -18 2 150.63 10.59
 6 -18 -2 171.43 10.87
 6 -18 2 147.19 9.76
 7 -18 2 5.79 2.17
 7 -18 -2 13.96 3.48
 7 18 2 7.87 3.33
 7 -18 2 6.9 2.47
 7 -18 -2 12.38 3.04
 7 -18 2 4.68 3.4
 7 -18 -2 11.33 3.45
 8 -18 -2 205.62 13.78
 8 -18 2 189.04 11.91
 8 -18 -2 202.8 12.1
 8 -18 2 200.27 13.33
 8 18 2 213.02 16.29
 8 -18 2 188.07 10.68
 8 -18 -2 241.36 12.95
 9 18 2 2.88 1.91
 9 -18 -2 0.9 1.33
 9 -18 2 2.06 1.5
 9 -18 2 1.28 1.76
 9 -18 2 1.99 3
 9 -18 -2 -1.71 1.66
 9 -18 -2 2.84 2.1
 10 -18 2 183 11.79
 10 -18 -2 228.24 12.86
 10 -18 -2 181.71 11.58
 10 -18 -2 198.64 13.38
 10 -18 2 167 12.98
 10 18 2 205.55 14.92
 10 -18 2 186.77 10.92
 11 -18 -2 16.83 3.72
 11 -18 2 14.53 3.53
 11 -18 -2 14.16 3.58
 11 -18 2 16.52 3.81
 11 18 2 15.28 4.18
 11 -18 2 14.65 4.97
 11 -18 -2 14.84 4.2
 12 -18 -2 46.13 6.93
 12 -18 -2 34.6 5.36
 12 -18 -2 34.7 5.28
 12 -18 2 28.08 4.61
 12 18 2 33.52 6.11
 12 -18 2 27.49 4.81
 12 -18 2 28.52 5.46
 13 -18 2 7.58 3.32
 13 -18 -2 6.06 2.55
 13 -18 -2 4.44 2.25
 13 -18 2 3.74 3.3
 13 18 2 5.51 2.87
 13 -18 2 6.63 2.59
 14 18 2 81 9.34
 14 -18 2 88.63 8.05
 14 -18 2 81.44 9
 14 -18 2 87.45 8.35
 14 -18 -2 84.62 8.38
 14 -18 -2 85.05 8.14
 15 -18 -2 15.61 3.67
 15 -18 2 17.98 3.58
 15 -18 -2 12.89 3.62
 15 -18 2 18.37 4.93
 15 18 2 10.16 4.03
 15 -18 2 14.52 3.91
 16 -18 -2 59.27 6.92
 16 -18 2 60.04 6.89
 16 18 2 64.09 8.58
 16 -18 2 64.18 7.53
 16 -18 -2 68.85 7.42
 17 -18 -2 -5.48 2.95
 17 -18 2 -0.1 1.83
 17 18 2 -3.43 2.81
 17 -18 2 0.99 2.13
 17 -18 -2 -2.02 2.35
 18 18 2 132.43 12.4
 18 -18 2 128.94 11.22
 18 -18 -2 148.05 10.49
 18 -18 2 134.07 10.8
 19 -18 2 -2.17 2.15
 19 -18 2 1.95 2.09
 19 -18 -2 0.72 1.66
 19 18 2 4.26 3.37
 20 -18 -2 11.3 3.48
 20 18 2 14.82 4.98
 20 -18 2 12.07 3.43
 21 -18 2 18.38 4.67
 21 18 2 16.36 4.9
 21 -18 -2 14.38 3.62
 22 -18 -2 4.85 2.37
 22 18 2 5.81 3.56
 22 -18 2 8.68 3.56
 23 -18 -2 7.38 3.03
 23 18 2 3.49 2.75
 23 -18 2 7.5 3.06
 24 -18 2 233.89 14.48
 24 -18 -2 216.85 13.26
 25 -18 2 19.46 4.45
 25 -18 -2 20.96 4.29
 26 -18 -2 108.8 9.34
 26 -18 2 112.85 9.92
 27 -18 2 0.09 1.65
 27 -18 -2 1.28 2.47
 28 -18 2 95.1 9.12
 28 -18 -2 96.6 8.78
 29 -18 -2 7.95 2.79
 29 -18 2 11.17 3.42
 30 -18 2 33.59 5.81
 30 -18 -2 32.49 5.25
 31 -18 -2 11.94 3.55
 31 -18 2 14.33 3.79
 32 -18 2 46.53 6.35
 32 -18 -2 36.65 5.32
 33 -18 -2 5.38 2.16
 33 -18 2 9.41 3.19
 34 -18 2 143.92 10.9
 34 -18 -2 120.7 8.73
 35 -18 2 4.23 2.15
 36 -18 2 89.03 7.9
 37 -18 2 8.29 2.73
 38 -18 2 2.51 1.86
 39 -18 2 3.66 1.92
 0 -19 -2 6.29 3.3
 0 19 2 2.94 2.8
 0 -19 2 12.58 4.82
 1 -19 2 53.69 8.13
 1 19 2 39.22 9.18
 -1 -19 2 52.55 7.34
 -1 -19 2 57.83 6.99
 1 -19 -2 54.75 7.54
 -1 -19 -2 46.73 7.58
 1 -19 2 57.6 8.18
 -1 19 2 39.65 8.8
 1 -19 2 58.44 7.55
 -2 -19 -2 -2.35 2.04
 2 -19 -2 -3.13 2.63
 2 -19 2 -0.08 1.97
 2 -19 2 -0.35 1.75
 2 -19 2 -0.53 2.43
 -2 -19 2 1.3 2.29
 -2 -19 2 1.37 2.57
 2 19 2 3.23 3.95
 2 -19 -2 0.07 2.71
 -3 -19 -2 36.58 6.25
 3 -19 2 35.56 5.64
 3 -19 -2 34.51 6.07
 3 19 2 32.37 8.37
 3 -19 2 41.2 6.95
 -3 -19 2 35 6.07
 3 -19 2 35.95 5.86
 3 -19 -2 35.9 5.92
 4 -19 2 2.46 2.09
 4 -19 -2 2.53 2.95
 4 -19 -2 0.98 1.77
 4 -19 2 4.83 2.83
 4 19 2 2.22 2.23
 -4 -19 -2 5.64 2.92
 -4 -19 2 -0.88 1.82
 4 -19 2 4.9 2.75
 5 -19 -2 32.62 5.21
 5 19 2 29.38 7.56
 -5 -19 -2 37.84 6.38
 5 -19 2 30.86 5.24
 5 -19 -2 36.35 6.78
 5 -19 2 21.27 6.44
 5 -19 2 29.93 5.49
 -5 -19 2 27.88 5.11
 6 -19 2 -2.1 2.26
 6 -19 2 -0.7 1.76
 6 19 2 -1.12 2.23
 6 -19 -2 3.13 2.6
 6 -19 2 -0.81 1.99
 6 -19 -2 2.66 3.65
 7 19 2 47.22 9.38
 7 -19 -2 62.08 8.74
 7 -19 2 45.39 7.79
 7 -19 2 46.7 6.86
 7 -19 2 52.9 6.37
 7 -19 -2 53.08 6.91
 8 -19 -2 -0.82 2.75
 8 -19 2 -2.24 3.59
 8 -19 2 -4.23 2.68
 8 19 2 -2.77 2.61
 8 -19 2 3.02 2.52
 8 -19 -2 0.93 2.39
 9 -19 -2 74.41 8.13
 9 -19 2 72.35 9.79
 9 -19 -2 86.28 10.14
 9 -19 2 78.68 7.84
 9 19 2 66.37 10.43
 9 -19 2 71.26 8.37
 10 -19 -2 0.64 1.59
 10 -19 -2 -10.1 3.82
 10 -19 -2 -4.01 2.03
 10 -19 2 3.3 1.86
 10 -19 2 2.32 2.59
 10 19 2 -4.76 3.62
 10 -19 2 -0.09 2.09
 11 -19 2 43.87 6.18
 11 -19 -2 44.29 6.56
 11 -19 2 42.34 6.81
 11 -19 -2 36.04 5.77
 11 19 2 40.83 7.85
 11 -19 -2 49.38 7.69
 11 -19 2 53.85 8.17
 12 -19 2 3.66 2.58
 12 -19 -2 1.8 3.08
 12 -19 2 1.1 2.92
 12 -19 -2 0.93 2.03
 12 19 2 -5.63 3.27
 12 -19 -2 2.08 1.54
 12 -19 2 2.62 1.93
 13 -19 2 13.37 3.99
 13 -19 2 21.16 4.33
 13 -19 2 11.83 4.12
 13 -19 -2 13.21 3.82
 13 19 2 11.18 4.23
 13 -19 -2 21.24 4.78
 14 19 2 3.89 2.71
 14 -19 2 -2.41 2.36
 14 -19 2 1.46 2.97
 14 -19 -2 -0.37 1.44
 14 -19 2 1.97 2.19
 14 -19 -2 0.49 1.69
 15 -19 2 2.3 2.12
 15 19 2 0.48 2.02
 15 -19 -2 4.65 2.47
 15 -19 -2 4.74 2.45
 15 -19 2 4.84 2.91
 16 19 2 -4.04 3.27
 16 -19 2 3.85 2.87
 16 -19 2 -1.18 2.27
 16 -19 -2 0.95 1.94
 17 -19 2 7.74 3.76
 17 -19 -2 12.13 3.93
 17 -19 2 10.07 3.76
 17 19 2 12.87 5.39
 18 -19 2 2.82 2.49
 18 19 2 3.73 2.61
 18 -19 2 2.65 2.52
 18 -19 -2 4.9 2.64
 19 -19 2 23.59 4.91
 19 -19 -2 17.8 4.28
 19 19 2 17.37 5.27
 20 -19 -2 -1.64 2.44
 20 19 2 1.04 2.54
 20 -19 2 0.89 2.1
 21 -19 -2 5.89 2.13
 21 -19 2 8.3 3.17
 21 19 2 7.22 3.84
 22 -19 2 -3.43 2.64
 22 -19 -2 -6.67 3.36
 23 -19 -2 34.14 6.33
 23 -19 2 23.82 5.2
 24 -19 -2 -3.02 2.53
 24 -19 2 -1.43 2.15
 25 -19 2 14.07 3.82
 25 -19 -2 12.18 3.81
 26 -19 2 -1.22 1.74
 26 -19 -2 1.42 1.4
 27 -19 2 23.3 5.14
 27 -19 -2 21.78 4.65
 28 -19 -2 3.01 1.91
 28 -19 2 1.35 1.84
 29 -19 -2 34.62 5.66
 29 -19 2 34.52 5.99
 30 -19 2 -1.62 2.07
 30 -19 -2 -3.35 2.13
 31 -19 -2 18.38 4.06
 31 -19 2 27.06 5.05
 32 -19 2 1.14 2.47
 32 -19 -2 1.97 1.99
 33 -19 2 35.89 5.6
 34 -19 2 -1.16 1.43
 35 -19 2 18.97 4.05
 36 -19 2 -2.87 1.88
 37 -19 2 8.7 2.59
 38 -19 2 1.92 1.81
 0 20 2 208.99 18.81
 0 -20 2 215.4 12.68
 0 -20 -2 229.21 14.51
 0 -20 2 245.28 13.76
 0 -20 2 236.02 14.67
 1 -20 2 0.56 2.05
 1 -20 -2 1.59 2.15
 1 -20 2 -2.63 2.3
 1 -20 2 -0.07 2.48
 1 20 2 -0.77 3.56
 -1 -20 -2 -5.42 4.18
 -1 -20 2 -0.08 1.83
 -1 -20 2 0.33 1.71
 -2 -20 -2 118.39 10.42
 2 -20 2 124.33 9.42
 2 -20 2 127.64 10.63
 2 20 2 110.55 14.56
 2 -20 -2 134.77 11.66
 -2 -20 2 133.18 10.23
 2 -20 2 133.05 10.4
 -3 -20 2 -0.96 1.61
 -3 -20 -2 -0.08 2.25
 3 -20 2 -1.24 3.04
 3 -20 2 3.16 2.31
 3 -20 -2 1.03 2.26
 3 20 2 2.21 3.05
 3 -20 2 0.39 1.8
 3 -20 -2 7.97 2.55
 -4 -20 -2 0.95 2.39
 4 -20 -2 2.32 2.3
 4 20 2 6.35 3.71
 4 -20 -2 3.84 2.01
 4 -20 2 -0.21 2.64
 -4 -20 2 1.67 1.84
 4 -20 2 -1.64 1.49
 4 -20 2 5.48 2.74
 5 20 2 2.88 4.67
 -5 -20 2 4.35 2.69
 5 -20 -2 7.35 4.21
 5 -20 2 7.42 3
 5 -20 2 4.22 2.16
 -5 -20 -2 5.42 2.77
 5 -20 -2 1.93 1.91
 5 -20 2 6.29 3.13
 -6 -20 -2 199.7 13.47
 6 -20 2 207.56 12.84
 6 20 2 188.1 17.48
 6 -20 -2 213.47 14.6
 6 -20 2 208.85 14.11
 6 -20 2 188.4 11.42
 6 -20 -2 203.1 12.24
 7 20 2 2.69 2.78
 -7 -20 -2 2.48 4.08
 7 -20 -2 4.22 3.74
 7 -20 2 -4.1 3.01
 7 -20 -2 -1.21 2.5
 7 -20 2 2.46 2.09
 7 -20 2 3.99 2.33
 8 -20 2 324.07 16.15
 8 -20 -2 337.5 15.83
 8 -20 2 306.27 14.6
 8 20 2 320.56 21.92
 8 -20 -2 332.36 18.37
 8 -20 2 345.67 18.2
 9 -20 -2 5.03 2.81
 9 20 2 9.35 4.39
 9 -20 2 8.6 2.96
 9 -20 2 1.8 2.34
 9 -20 2 11.11 3.35
 9 -20 -2 6.26 2.88
 10 -20 2 139.43 10.74
 10 -20 2 129.64 9.92
 10 -20 -2 138.37 10.3
 10 20 2 131.11 13.73
 10 -20 2 147.44 12.03
 10 -20 -2 140.69 12.15
 11 -20 2 4.92 2.85
 11 -20 -2 4.77 2.82
 11 -20 2 -1.25 2.71
 11 -20 -2 5.98 2.97
 11 20 2 1.07 2.57
 11 -20 2 -2.41 2.21
 12 -20 -2 14.5 4.15
 12 20 2 4.22 1.96
 12 -20 2 8.12 3.08
 12 -20 2 9.88 3.59
 12 -20 2 8.19 2.92
 13 20 2 0.09 2.72
 13 -20 2 3.14 2.47
 13 -20 -2 0.53 1.83
 13 -20 2 3.54 2.45
 14 20 2 4.97 3.24
 14 -20 2 0.33 2.69
 14 -20 2 11.64 3.79
 14 -20 -2 4.83 2.5
 14 -20 2 5.8 2.76
 15 -20 -2 1.73 2.1
 15 -20 2 1.12 1.74
 15 20 2 7.79 4.27
 15 -20 2 5.44 3.46
 16 20 2 256.59 18.71
 16 -20 2 289.27 16.53
 16 -20 2 269.42 14.88
 16 -20 -2 288.46 15.28
 17 20 2 2.98 2.38
 17 -20 -2 2.54 1.97
 17 -20 2 1.23 2.46
 18 -20 -2 21.54 3.91
 18 -20 2 23.91 4.84
 18 20 2 20.64 5.4
 19 -20 -2 15.2 3.86
 19 -20 2 15.55 3.82
 19 20 2 15.36 4.82
 20 -20 -2 4.72 2.73
 20 -20 2 4.95 2.56
 21 -20 2 6.84 2.98
 21 -20 -2 20.41 4.36
 22 -20 -2 32.77 5.19
 22 -20 2 36.06 5.84
 23 -20 -2 6.45 2.53
 23 -20 2 5.81 3.08
 24 -20 2 45.88 6.8
 24 -20 -2 45.59 6.05
 25 -20 -2 2.26 1.79
 25 -20 2 0.24 1.58
 26 -20 2 277.58 15.53
 26 -20 -2 269.14 14.45
 27 -20 -2 -1.81 1.89
 27 -20 2 -0.42 1.83
 28 -20 -2 44.35 6.15
 28 -20 2 59.22 7.12
 29 -20 2 8.6 3.38
 29 -20 -2 7.38 2.48
 30 -20 -2 17.37 3.64
 30 -20 2 18.42 4.19
 31 -20 -2 3.42 1.89
 31 -20 2 1.38 1.68
 32 -20 2 36.15 5.55
 33 -20 2 11.7 3.26
 34 -20 2 122.15 9.16
 35 -20 2 -0.7 1.31
 36 -20 2 19.26 3.67
 37 -20 2 5.19 2.62
 0 -21 2 0.18 1.81
 0 -21 2 -3.61 3.02
 0 -21 -2 2.32 3.28
 0 -21 2 1.06 1.86
 1 -21 2 13.3 3.75
 1 -21 2 9.03 3.18
 1 -21 -2 9.69 4.85
 -1 -21 -2 0.77 2.59
 1 -21 2 6.31 3.42
 -1 -21 2 22.12 4.95
 -1 -21 2 11.71 4
 2 21 2 -3.21 4.17
 2 -21 2 0.67 1.8
 -2 -21 -2 3.27 2.61
 2 -21 -2 -0.95 3.04
 2 -21 2 -0.03 2.36
 2 -21 2 -0.09 2.72
 -2 -21 2 1.44 1.68
 3 -21 2 3.53 3.32
 -3 -21 2 4.51 2.25
 3 21 2 3.48 3.68
 3 -21 2 1.52 2.2
 3 -21 2 4.27 2.59
 -3 -21 -2 2.12 2.87
 3 -21 -2 2.72 3.41
 4 -21 -2 -1.46 1.68
 4 -21 2 0.68 1.94
 4 21 2 1.41 2.82
 -4 -21 -2 -0.5 2.65
 -4 -21 2 -0.88 1.71
 4 -21 -2 -0.7 2.56
 4 -21 2 4.36 1.86
 -5 -21 -2 3.32 2.4
 5 -21 -2 7.61 3.1
 5 -21 2 3.85 2.93
 5 -21 -2 6.42 3.3
 5 21 2 -2.3 2.78
 5 -21 2 11.27 3.98
 -5 -21 2 12.2 3.79
 5 -21 2 9.73 3.37
 6 -21 2 -0.44 2.48
 6 -21 -2 -4.23 2.57
 6 -21 2 -0.3 1.9
 6 -21 -2 0.92 2.52
 -6 -21 -2 -5.06 3.51
 6 -21 2 1.78 1.75
 6 21 2 -4.75 4.17
 7 -21 -2 16.12 5.17
 7 -21 2 28.5 5.42
 7 21 2 14.45 6.36
 7 -21 2 16.83 4.99
 7 -21 -2 14.59 4.15
 -7 -21 -2 16.09 4.02
 7 -21 2 18.99 4.26
 8 -21 2 1.3 2.27
 -8 -21 -2 -1.21 3.02
 8 -21 2 1.5 1.72
 8 -21 -2 1.82 2.64
 8 -21 2 -4.66 3.26
 8 21 2 -0.36 3.02
 8 -21 -2 0.27 3.11
 -9 -21 -2 8.51 3.47
 9 -21 2 8.62 3.53
 9 -21 2 9.39 4.06
 9 -21 -2 17.42 5.11
 9 -21 -2 6.95 3.35
 9 21 2 13.18 6.13
 9 -21 2 10.68 3.74
 10 -21 -2 -2.2 2.35
 10 -21 2 -0.05 3.15
 10 -21 2 0.04 1.92
 10 21 2 2.47 2.93
 10 -21 -2 5.22 2.93
 10 -21 2 3.04 2.53
 11 -21 2 12.69 3.96
 11 -21 -2 5.76 2.89
 11 -21 2 12.35 4.65
 11 21 2 -1.49 2.31
 11 -21 -2 10.89 3.92
 11 -21 2 6.93 3.27
 12 -21 -2 0.71 2.79
 12 -21 2 -0.97 2.42
 12 -21 2 1.04 2.37
 12 21 2 1.48 4.21
 12 -21 2 2.98 2.5
 13 -21 2 16.05 5.03
 13 -21 2 17.74 5.28
 13 -21 2 22.02 4.81
 13 21 2 16.66 5.76
 13 -21 -2 16.08 4.08
 14 -21 -2 1.31 2.11
 14 -21 2 0.93 2.94
 14 -21 2 1.4 2.17
 14 -21 2 4.33 3.14
 14 21 2 -1.5 2.44
 15 -21 -2 35.51 6.56
 15 -21 2 50.15 7
 15 21 2 35.61 8.43
 16 -21 -2 -3.06 2.32
 16 -21 2 -1.6 2.27
 16 21 2 2.7 3.3
 17 -21 -2 8.97 3.48
 17 21 2 4.71 3.27
 17 -21 2 9.04 3.49
 18 -21 -2 2.09 1.97
 18 -21 2 -0.26 2.16
 19 -21 2 2.69 2.28
 19 -21 -2 15.79 4.48
 20 -21 -2 0.28 1.52
 20 -21 2 -1.71 2.44
 21 -21 -2 -1.08 1.45
 21 -21 2 1.4 2.33
 22 -21 2 2.68 2.36
 22 -21 -2 0.68 2.07
 23 -21 -2 5.27 2.93
 23 -21 2 13.59 4.23
 24 -21 -2 -2.36 1.57
 24 -21 2 -2.97 2.52
 25 -21 -2 14.25 3.7
 25 -21 2 21.39 4.96
 26 -21 -2 -0.94 1.4
 26 -21 2 -1.55 1.89
 27 -21 2 9.51 3.12
 27 -21 -2 4.27 1.92
 28 -21 2 -1.52 1.99
 28 -21 -2 0.23 1.57
 29 -21 2 11.35 3.79
 29 -21 -2 7.56 2.47
 30 -21 -2 4.11 2.15
 30 -21 2 0.47 1.92
 31 -21 2 -0.74 1.38
 32 -21 2 0.62 1.32
 33 -21 2 3.78 2.38
 34 -21 2 0.54 1.12
 35 -21 2 2.41 1.78
 36 -21 2 1.82 1.56
 0 -22 2 91.95 9.82
 0 -22 -2 93.31 9.88
 0 -22 2 96.56 9.32
 1 -22 2 2.55 4.26
 1 -22 2 -0.18 2.07
 -1 -22 2 0.17 2.71
 1 -22 -2 -2.23 3.24
 -1 -22 -2 -1.88 3.38
 1 -22 2 0.79 2.22
 -1 -22 2 4.37 2.56
 -2 -22 -2 28.63 5.66
 2 -22 2 31.42 5.3
 2 -22 2 30.41 5.44
 2 -22 2 21.22 5.17
 2 -22 -2 40.41 6.97
 -2 -22 2 32.93 5.53
 -2 -22 2 27.77 5.83
 3 -22 -2 6.38 3.15
 3 -22 2 5.05 2.6
 3 -22 2 4.62 3.08
 3 -22 2 3.16 2.58
 -3 -22 -2 7.55 3.68
 -3 -22 2 3.81 3.1
 -3 -22 2 4.9 3.15
 4 -22 -2 13.39 4.71
 4 -22 2 18.67 4.93
 4 -22 2 18.51 3.95
 -4 -22 -2 11.77 4.08
 4 22 2 12.91 6.03
 4 -22 2 15.06 4.19
 5 -22 -2 -1.16 3.13
 5 -22 -2 1.87 3.5
 5 22 2 -0.08 3.83
 5 -22 2 3.16 2.33
 5 -22 2 5.3 2.9
 -5 -22 -2 -2.83 2.43
 5 -22 2 2.69 2.04
 6 -22 -2 199.15 12.98
 6 -22 -2 211.73 15.53
 6 -22 2 228.04 15.67
 6 -22 2 215.48 13.91
 6 -22 2 208.84 12.63
 -6 -22 -2 209.48 13.96
 6 22 2 179.27 19.12
 -7 -22 -2 1.06 3.27
 7 22 2 -0.11 2.99
 7 -22 2 1.6 2.6
 7 -22 2 -1.45 2.6
 7 -22 -2 0.39 3.95
 7 -22 -2 -5.02 3.19
 7 -22 2 3.31 2.69
 8 -22 2 315.36 18.04
 8 -22 2 314.32 16.71
 8 -22 -2 317.65 18.7
 8 22 2 255.13 22.32
 -8 -22 -2 283.59 16.3
 8 -22 2 268.08 14.39
 8 -22 -2 295.77 15.54
 9 -22 2 2.55 2.31
 9 -22 -2 0.68 2.63
 9 -22 -2 0.26 2.75
 9 -22 2 0.94 2.4
 9 22 2 -0.68 3.18
 -9 -22 -2 1.81 3.19
 9 -22 2 6.4 3.57
 10 -22 -2 112.21 9.69
 -10 -22 -2 113.58 10.1
 10 -22 -2 125.68 11.98
 10 -22 2 143.73 12.31
 10 -22 2 127.65 9.96
 10 -22 2 123.47 10.86
 10 22 2 114.53 14.66
 11 22 2 3.33 3.62
 11 -22 -2 5.09 3.12
 11 -22 2 3.76 2.31
 -11 -22 -2 5.35 3.38
 11 -22 2 3.57 3.1
 11 -22 2 6.21 3.03
 12 -22 2 27.77 5.18
 12 -22 2 24.52 5.6
 12 22 2 19.3 6.4
 -12 -22 -2 21.86 4.78
 12 -22 2 20.35 4.43
 12 -22 -2 20.84 4.63
 13 -22 2 2.77 2.78
 13 22 2 1.57 2.94
 13 -22 2 -1.19 2.35
 13 -22 -2 1.45 1.7
 14 -22 2 59.81 7
 14 -22 -2 42.95 6.13
 14 22 2 42.38 8.55
 15 -22 -2 2.94 2.09
 15 -22 2 -1.44 1.92
 16 -22 2 5.24 2.62
 16 -22 -2 10.31 3.3
 17 -22 2 3.47 2.53
 17 -22 -2 2.45 1.86
 18 -22 -2 11.49 3.07
 18 -22 2 13.39 3.94
 19 -22 2 7.66 2.84
 19 -22 -2 4.23 2.48
 20 -22 -2 0.48 2.23
 20 -22 2 1.24 2.57
 21 -22 -2 1.33 1.38
 21 -22 2 3.36 2.14
 22 -22 -2 36.02 5.18
 22 -22 2 34.48 5.85
 23 -22 2 1.99 2.4
 23 -22 -2 -2.39 2.44
 24 -22 2 186.47 12.83
 24 -22 -2 158.05 11.08
 25 -22 2 2.94 1.79
 25 -22 -2 1.55 1.95
 26 -22 -2 111.56 9.07
 26 -22 2 140.33 10.9
 27 -22 2 -3.05 2.63
 27 -22 -2 -1.27 1.26
 28 -22 -2 93.11 8.19
 28 -22 2 129.27 10.41
 29 -22 -2 -2.12 1.61
 29 -22 2 4.87 2.26
 30 -22 2 8.14 2.97
 31 -22 2 -1.38 1.59
 32 -22 2 24.39 4.32
 33 -22 2 1.11 1.36
 34 -22 2 31.2 4.41
 35 -22 2 0.67 1.09
 0 -23 2 5.81 2.64
 0 -23 -2 -0.89 2.64
 1 -23 -2 25.7 6.4
 1 -23 2 22.89 5.47
 -1 -23 -2 35.54 7.63
 1 -23 2 26.02 5.75
 -1 -23 2 15.25 5.44
 -2 -23 -2 1.92 2.37
 2 -23 2 0.64 2.18
 2 -23 -2 -5.8 3.29
 -2 -23 2 1.95 2.7
 2 -23 2 -1.05 2.19
 -3 -23 -2 43.9 7.44
 3 -23 2 45.49 7.79
 3 -23 -2 43.8 7.79
 3 -23 2 34.33 6.2
 3 -23 2 45.89 6.33
 -3 -23 2 32.06 6.68
 -4 -23 -2 1.67 4.17
 4 -23 -2 -0.47 3.48
 4 -23 2 3.9 3.95
 4 -23 2 -4.75 3.86
 -4 -23 2 4.01 3.62
 4 -23 2 0.95 1.89
 5 -23 2 93.06 11.9
 5 -23 -2 99.02 11.68
 -5 -23 -2 109.6 11.77
 5 -23 2 125.47 10.14
 5 -23 2 107.56 10.69
 -5 -23 2 92.85 11.29
 6 23 2 -1.53 3
 -6 -23 -2 3.91 4.52
 6 -23 2 -1.26 2.29
 6 -23 -2 -1.85 3.68
 6 -23 2 -1.61 3.7
 6 -23 2 -4.7 2.39
 7 -23 -2 117.38 12.31
 7 -23 2 118.05 11.17
 7 -23 2 122.9 12.27
 -7 -23 -2 132.46 11.94
 7 -23 2 112.03 10.01
 7 -23 -2 125.63 10.61
 8 -23 2 -0.82 2.71
 8 -23 -2 4.44 4.39
 -8 -23 -2 0.87 3.92
 8 23 2 -3.12 3.99
 8 -23 -2 -5.24 3.51
 8 -23 2 7.19 3.97
 9 -23 -2 106.79 9.97
 9 -23 -2 141.89 13.42
 9 -23 2 130.53 12.59
 -9 -23 -2 139.04 12.09
 9 -23 2 119.77 10.6
 -10 -23 -2 4.54 4.76
 10 -23 -2 0.24 3.03
 10 23 2 -5.56 5.45
 10 -23 2 2.57 3.01
 10 -23 2 4.37 3.84
 10 -23 -2 -0.32 3.11
 11 -23 -2 114.23 10.69
 11 -23 2 122.49 12.1
 -11 -23 -2 133.68 12.27
 11 -23 2 113.78 10.18
 12 -23 2 8.63 4.11
 12 -23 2 2.81 4.04
 12 -23 -2 7.78 4.21
 -12 -23 -2 3.37 4
 -13 -23 -2 116.03 11.38
 13 -23 2 94.19 10.38
 13 -23 2 96.47 9.37
 13 -23 -2 92.35 9.44
 14 -23 -2 3.37 3.95
 -14 -23 -2 9.11 3.99
 15 -23 -2 61.23 7.5
 15 -23 2 79.68 8.54
 -15 -23 -2 67.82 8.84
 16 -23 2 4.11 3.63
 -16 -23 -2 7.29 4.47
 16 -23 -2 4.11 3.31
 17 -23 2 113.74 10.55
 17 -23 -2 103.54 9.79
 -17 -23 -2 138.08 11.89
 18 -23 2 8.35 4.27
 18 -23 -2 4.51 3.38
 19 -23 2 55.64 7.38
 19 -23 -2 46.28 6.73
 20 -23 2 7.2 3.76
 20 -23 -2 15.39 3.34
 21 -23 -2 43.67 6.2
 21 -23 2 50.53 7.21
 22 -23 -2 -0.59 1.75
 22 -23 2 -0.3 1.55
 23 -23 2 55.26 7.68
 23 -23 -2 36.62 5.49
 24 -23 2 0.89 1.79
 24 -23 -2 0.51 1.34
 25 -23 2 52.04 7.01
 25 -23 -2 28.9 4.92
 26 -23 2 5.19 3.44
 26 -23 -2 1.77 2.25
 27 -23 -2 49.72 6.02
 27 -23 2 77.75 8.2
 28 -23 -2 -0.34 1.32
 28 -23 2 2.62 1.9
 29 -23 2 58.21 6.76
 30 -23 2 0.96 1.32
 31 -23 2 40.35 5.33
 32 -23 2 -2.02 1.74
 33 -23 2 20.87 3.89
 34 -23 2 0.05 1.29
 0 -24 -2 82.67 9.56
 0 -24 2 62.88 9.68
 1 -24 2 0.17 2.52
 1 -24 -2 -1.25 3.83
 -1 -24 -2 -3.18 2.67
 -1 -24 2 3.27 3.52
 2 -24 -2 29.86 6.21
 -2 -24 -2 33.59 6.79
 2 -24 2 25.7 5.98
 -2 -24 2 24.67 6.25
 -3 -24 2 1.58 3.04
 3 -24 2 5.43 3.63
 -3 -24 -2 4.56 4.03
 3 -24 -2 1.08 3.21
 -4 -24 -2 8 2.93
 4 -24 -2 10.83 4.19
 4 -24 2 13.38 4.39
 -4 -24 2 13.92 5.04
 4 -24 2 7.65 2.92
 5 -24 -2 0.59 4.37
 5 -24 2 4.86 3.5
 5 -24 2 3.1 2.55
 -5 -24 2 7.68 4.39
 -5 -24 -2 4.9 4.51
 6 -24 2 169.7 13.99
 -6 -24 -2 157.38 12.42
 6 -24 -2 145.91 12.7
 -6 -24 2 186.14 14.06
 6 -24 2 150.88 10.92
 7 -24 2 0.75 2.98
 -7 -24 2 -0.4 3.72
 -7 -24 -2 -0.26 3.91
 7 -24 -2 -6.03 3.86
 7 -24 2 -3.92 3.19
 8 -24 2 169.33 11.72
 8 -24 -2 194.23 15.09
 8 -24 2 204.05 14.84
 -8 -24 -2 179.64 13.21
 9 -24 -2 9.93 4.44
 9 -24 -2 -10.21 4.32
 -9 -24 -2 -0.74 3.77
 9 -24 2 -5.72 3.68
 9 -24 2 5.14 3.97
 10 -24 2 184.98 13.95
 10 -24 -2 176.01 12.02
 -10 -24 -2 165.89 12.9
 10 -24 2 181.47 13.17
 11 -24 2 1.4 2.82
 -11 -24 -2 5.82 3.97
 12 -24 -2 4.46 1.79
 12 -24 2 8.83 3.53
 13 -24 2 -0.29 1.51
 -13 -24 -2 1.38 2.49
 13 -24 -2 4.76 2.78
 14 -24 -2 6.13 3.11
 -14 -24 -2 5.74 2.7
 14 -24 2 -1.45 1.89
 -15 -24 -2 6.24 4.07
 15 -24 2 4.87 2.75
 15 -24 -2 -4.87 2.77
 16 -24 -2 15.61 3.61
 16 -24 2 17.24 4.29
 -17 -24 -2 -0.81 2.64
 17 -24 -2 2.71 1.58
 18 -24 2 36.28 5.83
 18 -24 -2 29.08 5.17
 -18 -24 -2 34.59 6.04
 19 -24 -2 5.57 2.31
 -19 -24 -2 3.87 3.76
 19 -24 2 0.65 1.66
 20 -24 2 5.66 3.02
 20 -24 -2 8.32 3.06
 -20 -24 -2 11.18 3.86
 21 -24 2 8.15 3.23
 -21 -24 -2 3.72 2.02
 21 -24 -2 4.4 2.14
 22 -24 -2 42.73 5.77
 22 -24 2 55.64 7.3
 -22 -24 -2 49.42 6.87
 23 -24 2 4.12 2.55
 23 -24 -2 0.83 1.49
 -23 -24 -2 4.68 3.14
 24 -24 2 106.81 9.2
 24 -24 -2 103.83 8.62
 25 -24 -2 1.08 1.54
 25 -24 2 0.63 1.45
 26 -24 2 146.49 10.76
 26 -24 -2 110.19 8.45
 27 -24 2 7.86 2.67
 28 -24 2 38.86 5.48
 29 -24 2 -1.72 1.8
 30 -24 2 3.87 2.26
 31 -24 2 2.36 1.85
 32 -24 2 15.08 3.25
 0 -25 -2 -5.71 2.83
 0 -25 2 40.69 9.56
 -1 -25 -2 65.27 9.34
 1 -25 -2 66.25 10.63
 1 -25 2 60.7 8.7
 2 -25 2 -1.03 2.61
 -2 -25 2 -4.09 2.12
 -2 -25 -2 1.78 3.61
 -3 -25 -2 84.94 10.68
 3 -25 2 120.38 12.27
 -3 -25 2 99.52 11.25
 3 -25 -2 95.88 11.08
 -4 -25 -2 -4.17 4.13
 4 -25 -2 -7.23 3.91
 -4 -25 2 -1.13 3.77
 4 -25 2 3.37 3.59
 5 -25 -2 124.72 12.67
 -5 -25 -2 116.43 11.73
 5 -25 2 114.2 12.05
 -5 -25 2 121.12 12.1
 6 -25 -2 -5.24 3.67
 6 -25 2 -0.43 2.67
 -6 -25 2 3.06 5.27
 -6 -25 -2 2.54 5.7
 6 -25 2 8.88 4.8
 7 -25 -2 174.26 15.04
 -7 -25 -2 150.42 13.14
 7 -25 2 180.92 15.07
 -7 -25 2 177.07 14.3
 7 -25 2 155.76 11.24
 8 -25 2 10.63 5.37
 8 -25 2 -0.31 2.26
 8 -25 -2 2.56 3.54
 -8 -25 2 -1.21 4.47
 -8 -25 -2 6.66 6
 -9 -25 -2 175.96 13.9
 -9 -25 2 195.63 14.92
 9 -25 2 187.04 14.9
 9 -25 2 208.92 13.41
 10 -25 2 -2.69 3.55
 -10 -25 -2 12.13 6.16
 11 -25 2 126.73 12.6
 -11 -25 -2 138.75 12.12
 11 -25 2 145.87 11.14
 12 -25 2 3.25 4.02
 -12 -25 -2 7.41 5.05
 12 -25 -2 18.33 5.46
 13 -25 2 89.81 9.07
 13 -25 -2 98.72 9.14
 -13 -25 -2 105.22 10.54
 14 -25 2 12.65 5.26
 14 -25 -2 6.18 4.41
 -14 -25 -2 6.88 3.72
 15 -25 -2 104.72 9.45
 -15 -25 -2 131.99 11.61
 15 -25 2 135.46 10.86
 16 -25 -2 15.87 5.13
 -16 -25 -2 5.96 4.76
 16 -25 2 8.99 4.7
 -17 -25 -2 123.66 11.57
 17 -25 -2 109.71 9.82
 17 -25 2 123.24 10.54
 -18 -25 -2 8.89 4.4
 18 -25 -2 9.56 4.28
 18 -25 2 14.53 5.69
 -19 -25 -2 173.53 13.56
 19 -25 2 180.38 12.88
 20 -25 2 8.15 3.72
 -20 -25 -2 0.46 2.8
 20 -25 -2 1.99 3.11
 -21 -25 -2 74.39 9.12
 21 -25 -2 74.78 7.75
 22 -25 2 7.08 3.68
 -22 -25 -2 -0.75 2.43
 22 -25 -2 3.95 2.71
 23 -25 2 48.66 6.52
 23 -25 -2 34.46 5.16
 24 -25 -2 2.53 1.92
 24 -25 2 -0.61 1.79
 25 -25 2 48.93 6.18
 25 -25 -2 29.89 4.5
 26 -25 2 2.4 1.57
 27 -25 2 64.24 6.99
 28 -25 2 -2.05 1.78
 29 -25 2 63.19 6.41
 30 -25 2 3.35 1.77
 31 -25 2 33.84 4.47
 0 -26 -2 74.97 9.29
 0 -26 2 81.52 9.47
 -1 -26 2 -6.09 3.59
 1 -26 -2 -0.25 2.89
 1 -26 2 -11.68 4.75
 -1 -26 -2 -5.38 3.51
 -2 -26 2 55.75 7.93
 2 -26 -2 52.22 8.15
 2 -26 2 50.41 7.45
 -2 -26 -2 46.02 7.22
 -3 -26 2 2.9 3.31
 3 -26 2 1.19 2.56
 3 -26 -2 1.77 3.34
 -3 -26 -2 4.25 4.21
 -4 -26 -2 -0.06 2.25
 4 -26 -2 6.05 3.73
 4 -26 2 0.46 2.5
 -4 -26 2 -0.64 1.97
 5 -26 -2 -5.34 3.72
 -5 -26 -2 -5.1 3.75
 5 -26 2 0.67 2.44
 6 -26 -2 40.24 7.19
 6 -26 2 35.93 6.3
 -6 -26 2 42.81 7.03
 -6 -26 -2 30.58 5.46
 7 -26 -2 -2.92 3.41
 7 -26 2 -6.17 4.13
 -7 -26 -2 0.27 2.96
 -7 -26 2 -0.8 3.52
 8 -26 2 107.31 9.09
 8 -26 2 105.34 10.87
 -8 -26 -2 124.1 11.14
 -8 -26 2 118.44 10.98
 -9 -26 2 3.46 3.31
 -9 -26 -2 3.51 3.07
 9 -26 2 1.69 2.95
 -10 -26 2 23.14 5.19
 -10 -26 -2 27.77 5.77
 10 -26 2 20.27 5.44
 10 -26 2 21.56 4.25
 -11 -26 -2 2.02 2.9
 11 -26 2 -4.41 3.44
 -11 -26 2 2.27 2.18
 11 -26 2 -4.35 2.47
 -12 -26 -2 16.44 4.64
 12 -26 2 18.14 4.32
 -12 -26 2 19.26 4.95
 -13 -26 2 1.11 3.14
 -13 -26 -2 -1.41 2.09
 14 -26 2 21.81 4.6
 -14 -26 -2 16.57 4.63
 15 -26 2 12.07 4.07
 -15 -26 -2 4.1 3.39
 -16 -26 -2 102.58 10.19
 16 -26 -2 89.03 8.35
 16 -26 2 96.86 9.12
 17 -26 -2 1.4 3.07
 -17 -26 -2 2.74 2.74
 17 -26 2 4.7 3.92
 18 -26 2 66.61 7.45
 -18 -26 -2 71.79 8.17
 18 -26 -2 59.83 6.82
 19 -26 -2 5.15 2.79
 -19 -26 -2 1.95 2.32
 19 -26 2 8.72 3.55
 -20 -26 -2 3.38 2.61
 20 -26 -2 2.55 1.76
 20 -26 2 2.11 1.64
 -21 -26 -2 3.98 3.13
 21 -26 2 0.86 2.42
 21 -26 -2 4.55 2.17
 -22 -26 -2 8.15 2.84
 22 -26 -2 3.39 1.94
 22 -26 2 2.71 1.97
 23 -26 -2 0.42 1.1
 23 -26 2 4.45 2.48
 24 -26 2 37.29 5.33
 25 -26 2 2.18 2.06
 26 -26 2 36.42 5.08
 27 -26 2 1.36 1.46
 -28 -26 2 8.37 3.44
 28 -26 2 2.5 2.13
 29 -26 2 -0.84 1.39
 0 -27 2 -5.14 3.71
 0 -27 -2 -2.74 2.24
 -1 -27 -2 12.75 4.72
 1 -27 -2 20.31 5.82
 1 -27 2 23.51 5.31
 -1 -27 2 22.63 5.38
 2 -27 -2 -5.81 3.89
 2 -27 2 3.14 2.66
 -2 -27 2 -8.1 3.51
 -2 -27 -2 0.87 3.54
 -3 -27 -2 27.18 6.02
 -3 -27 2 36.29 6.97
 3 -27 2 28.26 6.01
 3 -27 -2 25.19 6.29
 4 -27 2 2.85 2.54
 -4 -27 -2 -1.09 3.28
 4 -27 -2 -6.23 3.05
 -4 -27 2 3.51 3.81
 -5 -27 -2 43.63 7.42
 -5 -27 2 40.65 7.48
 5 -27 2 45.4 7.31
 5 -27 -2 38.57 6.98
 6 -27 2 8.03 3.57
 -6 -27 2 5.78 3.42
 6 -27 -2 5.57 4.17
 -6 -27 -2 4.85 4.54
 -7 -27 -2 44.45 7.28
 -7 -27 2 31.22 6.57
 7 -27 2 32.82 6.42
 8 -27 2 -1.84 2.5
 -8 -27 -2 2.45 3.44
 -8 -27 2 -4.58 2.01
 9 -27 2 22.57 6.21
 -9 -27 -2 22.89 5.49
 -9 -27 2 25.17 5.34
 10 -27 2 1.84 2.51
 -10 -27 2 2.64 2.32
 -10 -27 -2 4.66 3.68
 -11 -27 2 16.34 4.94
 11 -27 2 14.27 3.63
 -11 -27 -2 12.38 4.08
 12 -27 2 1.85 2.54
 -12 -27 -2 -1.05 2.06
 -13 -27 -2 18.01 5.28
 13 -27 2 14.89 3.96
 -13 -27 2 23.91 5.38
 -14 -27 2 2.43 2.55
 -14 -27 -2 0.14 2.47
 14 -27 2 6.42 3.22
 -15 -27 2 25.82 5.66
 -15 -27 -2 19.37 4.86
 15 -27 2 35.64 5.49
 -16 -27 -2 3.99 3.24
 -16 -27 2 6.01 3.7
 16 -27 2 -0.34 2.42
 -17 -27 -2 49.2 7.57
 -17 -27 2 53.73 8.26
 17 -27 2 53.75 6.71
 -18 -27 -2 -0.08 2.27
 18 -27 2 1.87 2.51
 -18 -27 2 -0.06 2.93
 19 -27 2 40.78 5.89
 -19 -27 -2 34.84 6.3
 -19 -27 2 44.76 6.99
 -20 -27 2 4.99 3.81
 -20 -27 -2 1.1 1.77
 20 -27 2 5.1 2.7
 -21 -27 -2 27.48 5.42
 21 -27 2 23.01 4.19
 -21 -27 2 29.71 5.73
 -22 -27 2 1.71 2.47
 22 -27 2 1.42 1.72
 -23 -27 2 16.41 4.71
 23 -27 2 13.87 3.43
 24 -27 2 5.76 2.4
 -24 -27 2 3.24 1.91
 25 -27 2 13.64 3.34
 -25 -27 2 15.95 4.39
 -26 -27 2 -2.38 2.43
 26 -27 2 1.97 1.48
 27 -27 2 11.53 2.85
 -27 -27 2 7.18 2.66
 0 -28 2 89.49 9.77
 0 -28 -2 75.84 9.21
 1 -28 -2 -12.08 4.42
 -1 -28 2 -2.68 2.44
 -1 -28 -2 -2.59 4.04
 1 -28 2 -3.4 2.99
 -2 -28 2 79.77 9.51
 -2 -28 -2 67.14 8.68
 2 -28 -2 58.88 7.84
 2 -28 2 58.19 7.59
 3 -28 -2 2.83 3.23
 3 -28 2 2.78 4.14
 -3 -28 2 1.24 4.32
 -3 -28 -2 0.12 3.5
 4 -28 -2 20.57 5.68
 4 -28 2 17.92 4.98
 -4 -28 -2 17.37 4.61
 -4 -28 2 19.44 5.12
 -5 -28 -2 1.79 3.11
 5 -28 -2 2.26 2.5
 -5 -28 2 3.18 2.24
 5 -28 2 2.42 2.05
 -6 -28 -2 8.61 3.18
 -6 -28 2 5.26 2.04
 6 -28 2 1.52 2.07
 7 -28 2 3.79 3.42
 -7 -28 -2 -0.06 2.34
 -7 -28 2 1.77 2.12
 -8 -28 -2 21.28 4.68
 8 -28 2 15.88 5.18
 -8 -28 2 16.64 4.59
 -9 -28 -2 -3.09 2.53
 -9 -28 2 17.19 4.89
 -10 -28 -2 32.27 6.13
 -10 -28 2 31.28 5.66
 -11 -28 2 3.55 2.32
 -11 -28 -2 6.5 3.69
 -12 -28 2 -1.19 2.16
 -12 -28 -2 -1.41 1.79
 -13 -28 -2 4.97 3.44
 -13 -28 2 -3.74 2.75
 -14 -28 2 36.1 6.29
 -14 -28 -2 34.91 5.69
 -15 -28 2 6.64 5.36
 -15 -28 -2 -6.5 2.96
 15 -28 2 5.53 3.75
 16 -28 2 80.48 7.85
 -16 -28 -2 91.48 9.2
 -16 -28 2 109.29 10.14
 -17 -28 -2 4.25 3.26
 17 -28 2 3.22 2.65
 -17 -28 2 2.03 2.36
 -18 -28 -2 54.06 6.98
 -18 -28 2 56.78 7.37
 18 -28 2 65.52 6.76
 19 -28 2 -0.56 2.12
 -19 -28 -2 -0.25 1.88
 -19 -28 2 -2.39 2.36
 -20 -28 2 23.81 5
 -20 -28 -2 16.75 3.93
 20 -28 2 19.7 3.58
 21 -28 2 3.84 1.98
 -21 -28 2 2.25 1.76
 22 -28 2 1.77 1.3
 -22 -28 2 -6.28 3.11
 23 -28 2 -1.71 1.64
 -23 -28 2 4.28 2.65
 -24 -28 2 7.02 3.01
 24 -28 2 7.3 2.52
 -25 -28 2 38.44 7.21
 25 -28 2 4.97 2.04
 0 -29 -2 0.27 2.89
 0 -29 2 -3.46 3.07
 -1 -29 2 2.69 2.84
 1 -29 -2 13.22 4.78
 -1 -29 -2 13.48 4.26
 1 -29 2 9.96 4.22
 2 -29 -2 0.66 2.94
 -2 -29 2 0.15 2.39
 2 -29 2 -2.18 2.1
 3 -29 2 7.21 3.65
 3 -29 -2 10.85 3.64
 -3 -29 2 1.69 2.84
 -4 -29 -2 -1.98 1.96
 4 -29 2 2.85 2.47
 -4 -29 2 -0.52 2.67
 5 -29 2 8.81 3.83
 -5 -29 2 6.72 3.68
 -5 -29 -2 8.27 4.12
 6 -29 2 -0.54 2.53
 -6 -29 2 -0.46 2.03
 -6 -29 -2 0.93 2.46
 7 -29 2 5.55 2.98
 -7 -29 -2 8.57 3.55
 -7 -29 2 2.2 2.75
 -8 -29 2 0.24 2.16
 -8 -29 -2 -2.32 1.9
 -9 -29 2 11.31 3.93
 -9 -29 -2 8.86 3.71
 -10 -29 -2 2.78 2.85
 -10 -29 2 -1.23 2.03
 -11 -29 -2 2.83 3.04
 -11 -29 2 9.91 4.05
 -12 -29 2 4.13 3.14
 -12 -29 -2 0.74 1.9
 -13 -29 -2 0.95 2.03
 -13 -29 2 2.94 2.45
 -14 -29 -2 -0.4 2.33
 -14 -29 2 0.1 2.15
 -15 -29 -2 1.12 2.04
 -15 -29 2 3.62 2.12
 -16 -29 -2 1.1 2.43
 -16 -29 2 -3.4 2.47
 -17 -29 -2 0.32 2.09
 -17 -29 2 3.3 2.09
 -18 -29 -2 1.81 2.74
 -18 -29 2 0.82 2.2
 -19 -29 -2 2.83 2.17
 -19 -29 2 6.6 2.63
 -20 -29 2 0.95 2.06
 -21 -29 2 4.48 2.7
 -22 -29 2 -0.92 1.49
 0 -30 2 48.15 6.91
 0 -30 -2 51.03 7.41
 1 -30 -2 2.01 4.16
 -1 -30 -2 -5.22 3.09
 -1 -30 2 -1.76 2.76
 1 -30 2 -7.95 3.72
 2 -30 2 33.64 5.71
 -2 -30 -2 33.94 6.16
 -2 -30 2 28.76 5.79
 3 -30 2 -1.27 2.21
 -3 -30 2 -1.32 1.99
 4 -30 2 -2.45 3
 -4 -30 -2 3.14 3.1
 -4 -30 2 1.3 2.17
 -5 -30 -2 -1.78 2.4
 5 -30 2 0.16 2.66
 -5 -30 2 -4.69 2.63
 6 -30 2 1.99 2.61
 -6 -30 -2 4.55 3.47
 -6 -30 2 1.27 2.24
 -7 -30 -2 0.84 2.06
 -7 -30 2 -3.4 1.95
 -8 -30 2 23.1 4.95
 -8 -30 -2 17.82 4.37
 -9 -30 -2 -0.95 2.12
 -9 -30 2 -0.72 2.68
 -10 -30 2 22.31 5.18
 -10 -30 -2 14.49 4.26
 -11 -30 -2 2.68 2.58
 -11 -30 2 2.79 1.83
 -12 -30 2 -1.09 2.29
 -12 -30 -2 -2.23 1.93
 -13 -30 2 0.1 2.35
 -13 -30 -2 3.77 3.14
 -14 -30 -2 21.61 4.59
 -14 -30 2 22.35 4.97
 -15 -30 -2 6.37 3.43
 -15 -30 2 1.72 2.89
 -16 -30 -2 42.53 5.86
 -16 -30 2 58.37 7.16
 -17 -30 2 -2.13 2.73
 -17 -30 -2 -0.02 2.06
 -18 -30 2 57.43 6.88
 -19 -30 2 -1.98 2.12
 -20 -30 2 19.39 4.3
 0 -31 2 -2.82 2.19
 -1 -31 -2 23.5 5.7
 1 -31 2 14.4 4.23
 -1 -31 2 19.79 4.57
 -2 -31 2 -0.89 2.46
 2 -31 2 -7.14 3.09
 -2 -31 -2 2.29 2.81
 -3 -31 -2 21.32 5.4
 3 -31 2 24.46 5.31
 -3 -31 2 21.28 4.78
 4 -31 2 -3.49 2.69
 -4 -31 2 0.89 3.38
 -5 -31 2 39.51 6.59
 -5 -31 -2 38.18 6.56
 -6 -31 -2 6.5 3.64
 -6 -31 2 2.15 2.61
 -7 -31 2 28.41 5.46
 -7 -31 -2 23.5 5.58
 -8 -31 -2 2.66 3.44
 -8 -31 2 -1.19 2.5
 -9 -31 2 30.9 5.77
 -9 -31 -2 19 5.1
 -10 -31 -2 3.6 3.25
 -10 -31 2 2.67 3.09
 -11 -31 2 23.46 5.13
 -11 -31 -2 20.06 5.02
 -12 -31 -2 0.71 2.2
 -12 -31 2 1.73 3.75
 -13 -31 2 15.15 4.32
 -13 -31 -2 8.6 3.29
 -14 -31 -2 0.66 2.27
 -14 -31 2 18.67 4.22
 -15 -31 2 18.72 4.39
 -16 -31 2 -0.78 2.17
 -17 -31 2 24.68 4.62
 0 -32 2 28.44 5.15
 1 -32 2 -4.94 2.66
 -1 -32 2 0.94 2.82
 2 -32 2 6.57 3.21
 -2 -32 2 14.19 4.17
 -3 -32 2 -2.08 1.74
 -4 -32 2 -1 2.07
 -5 -32 -2 -0.7 2.47
 -5 -32 2 1.94 1.7
 -6 -32 2 15.88 4.11
 -6 -32 -2 11.09 3.84
 -7 -32 -2 2.25 2.94
 -7 -32 2 4.66 3.65
 -8 -32 -2 18.82 4.02
 -8 -32 2 15.44 3.86
 -9 -32 -2 3.85 2.82
 -9 -32 2 1.91 2.16
 -10 -32 2 27.78 5.16
 -10 -32 -2 15.11 3.83
 -11 -32 2 3.69 2.49
 -12 -32 2 5.53 3
 -13 -32 2 7.19 3.54
 -1 -33 2 6.27 2.31
 -2 -33 2 -1.18 2.38
 -3 -33 2 32.06 5.19
 -4 -33 2 1.16 2.78
 -5 -33 2 26.16 4.87
 -6 -33 2 2.35 2.8
 -7 -33 2 23.18 4.38
 0 0 -3 -0.32 0.53
 -1 0 -3 0.72 0.49
 1 0 -3 0.49 0.58
 -2 0 -3 2.52 0.73
 2 0 -3 1.75 0.82
 3 0 -3 -0.01 0.58
 -3 0 -3 -0.26 0.35
 4 0 -3 -0.4 0.8
 -4 0 -3 0.17 0.33
 5 0 -3 -0.64 0.77
 6 0 -3 0.99 0.9
 7 0 -3 1.28 1.09
 8 0 -3 4.86 1.66
 9 0 -3 1.41 1.15
 10 0 -3 4.06 1.51
 11 0 -3 -0.57 1.17
 12 0 -3 1.64 1.19
 13 0 -3 0.18 1.12
 14 0 -3 0.14 0.94
 15 0 -3 0.33 1.2
 16 0 -3 -1.08 1.21
 17 0 -3 0.32 1.08
 17 0 3 0.41 0.92
 18 0 -3 0.59 1.15
 18 0 3 -0.22 0.84
 19 0 -3 0.91 1.22
 19 0 3 0.11 0.86
 19 0 3 0.03 0.95
 20 0 -3 3.43 2.02
 20 0 3 1 1.06
 20 0 3 1.6 1.21
 21 0 -3 0.28 1.09
 21 0 3 0.25 1.13
 21 0 3 0.34 0.73
 22 0 -3 9.81 3.58
 22 0 3 3.92 2.2
 23 0 -3 -0.12 1.24
 24 0 -3 23.27 5.01
 25 0 -3 0.57 1.76
 26 0 -3 23.92 4.63
 27 0 -3 0.96 2.21
 28 0 -3 8.26 2.89
 29 0 -3 -0.33 1.81
 30 0 -3 13.71 4.62
 31 0 -3 1.38 1.86
 31 0 -3 1.52 3.41
 32 0 -3 0.62 1.85
 32 0 -3 -1.42 1.93
 32 0 3 2.16 2.97
 33 0 -3 -4.56 3.2
 33 0 3 4.14 2.96
 33 0 -3 1.37 2.14
 34 0 3 5.05 3.9
 34 0 -3 0.5 2.92
 34 0 -3 -1 2.09
 35 0 3 -3.83 3.14
 35 0 -3 9.37 3.5
 36 0 -3 0.22 1.82
 36 0 3 -3.04 2.89
 37 0 -3 0.28 2.31
 37 0 3 -1.75 2.72
 38 0 -3 4.51 2.34
 38 0 3 6.79 3.38
 39 0 3 -2.38 2.71
 39 0 -3 -0.53 2.05
 40 0 3 6.58 3.59
 40 0 -3 7.23 3.47
 41 0 -3 2.24 4.29
 41 0 3 0.95 2.35
 42 0 3 5.62 2.59
 43 0 3 -2.21 2.21
 44 0 3 7.56 3.34
 45 0 3 1.74 1.78
 46 0 3 1.37 1.73
 47 0 3 -1.18 1.63
 0 -1 -3 -0.24 0.51
 0 1 -3 0 0.44
 -1 -1 -3 203.81 4.99
 1 -1 -3 198.75 5.31
 -1 1 -3 203.74 4.39
 1 1 -3 191.53 5.05
 2 1 -3 0.45 0.61
 2 -1 -3 -0.44 0.68
 -2 -1 -3 0.14 0.39
 -2 1 -3 -0.54 0.39
 3 1 -3 330.8 7.95
 -3 -1 -3 334.12 5.87
 -3 1 -3 347.21 4.6
 3 -1 -3 338.42 7.53
 4 1 -3 5.52 1.34
 4 -1 -3 4.78 1.1
 -4 -1 -3 4.66 0.84
 -4 1 -3 4.35 0.59
 5 1 -3 2.92 1
 5 -1 -3 4.18 1
 -5 -1 -3 5.03 0.83
 6 1 -3 4.85 1.47
 6 -1 -3 4.56 1.18
 7 1 -3 1617.77 20.76
 7 -1 -3 1597.24 19.48
 8 1 -3 102.33 6.15
 8 -1 -3 160.75 7.23
 9 -1 -3 4638.61 36.27
 9 1 -3 4628.01 37.53
 10 1 -3 134.25 6.92
 10 -1 -3 145.36 6.93
 11 -1 -3 743.12 15.4
 11 1 -3 724.8 15.61
 12 -1 -3 23.25 3.12
 12 1 -3 19.73 3
 13 -1 -3 783.82 16.95
 13 1 -3 743.22 16.73
 14 -1 -3 3.64 1.37
 14 1 -3 5.62 1.9
 15 1 -3 22.31 3.16
 15 -1 -3 22.24 3.09
 16 -1 -3 6.1 1.67
 16 -1 3 4.68 1.19
 16 1 -3 5.86 1.69
 17 1 -3 17.14 2.95
 17 -1 3 18.4 2.43
 17 -1 -3 17.14 2.81
 17 1 3 17.03 2.49
 17 -1 3 16.43 2.38
 18 1 3 11.42 2.24
 18 1 -3 14.38 2.98
 18 -1 -3 17.15 3.15
 18 -1 3 11.69 2.26
 18 -1 3 11.87 2.24
 19 -1 3 15.99 2.37
 19 1 -3 15.81 2.86
 19 1 3 18.34 2.95
 19 -1 3 15.26 2.36
 19 -1 -3 17.89 3.12
 20 1 3 2.33 1.71
 20 1 -3 6.11 2.4
 20 -1 3 3.43 1.57
 20 -1 -3 4.46 2.41
 21 1 3 1276 23.73
 21 1 -3 1330.11 28.55
 21 -1 -3 1308.51 26.92
 22 1 3 3.68 1.6
 22 1 -3 6.4 2.11
 22 1 3 3.52 1.79
 22 -1 -3 6.05 2.16
 23 1 -3 1187.46 28.58
 23 -1 -3 1142.27 26.63
 24 1 -3 19.35 3.84
 24 -1 -3 17.98 3.35
 25 -1 -3 1090.82 27.58
 25 1 -3 1094.94 28.63
 26 1 -3 10.46 3.39
 26 -1 -3 10.76 2.61
 27 1 -3 746.31 25.07
 27 -1 -3 723.73 23.9
 28 -1 -3 12.97 3.67
 28 1 -3 10.94 3.42
 29 -1 -3 260.69 15.13
 29 -1 -3 244.75 14.22
 29 1 -3 254.51 15.35
 30 -1 -3 12.14 3.69
 30 -1 3 14.05 4.1
 30 -1 -3 9.85 3
 30 1 -3 11.77 3.84
 31 1 -3 5.14 3.11
 31 -1 -3 2.98 2.45
 31 -1 3 1.58 2.65
 31 -1 -3 0.76 2.61
 32 1 -3 2.85 2.57
 32 -1 -3 2 2.36
 32 -1 -3 6.55 3.12
 32 -1 3 4.08 3.07
 33 1 -3 207.32 15.6
 33 1 -3 233.01 14.74
 33 -1 -3 214.53 15.55
 33 -1 -3 227.99 14.44
 33 -1 3 241.44 15.43
 34 -1 3 29.14 5.85
 34 1 -3 31.33 6.22
 34 1 3 26.94 5.91
 34 -1 -3 23.22 5.57
 34 1 -3 22.09 5.77
 34 -1 -3 24.96 5.6
 35 -1 3 32.26 5.87
 35 1 -3 42.4 6.42
 35 1 3 39.54 6.22
 35 -1 -3 37.45 5.9
 36 1 -3 25.72 5.32
 36 -1 -3 15.16 3.59
 36 -1 3 19.67 5.35
 36 1 3 15.26 4.82
 37 -1 -3 243.58 15.17
 37 -1 3 247.68 15.71
 37 1 -3 250.99 15.54
 37 1 3 248.88 16.08
 38 -1 -3 1.98 2.27
 38 -1 3 2.06 2
 38 1 3 2.14 1.92
 38 1 -3 -1.06 1.72
 39 1 3 420.33 20.44
 39 -1 -3 384 18.79
 39 1 -3 429.5 20.17
 39 -1 3 419.9 20.49
 40 -1 3 3.03 2.73
 40 1 -3 2.98 1.91
 40 -1 -3 0.47 2.42
 40 1 3 5.93 3.07
 41 1 -3 468.6 20.24
 41 -1 3 468.46 20.99
 41 1 3 476.47 21.23
 42 -1 3 10.51 3.07
 42 1 3 10.74 3.7
 43 1 3 326.99 16.73
 43 -1 3 313.97 16.23
 44 -1 3 12.47 3.32
 44 1 3 9.08 3.27
 45 -1 3 109.15 9.13
 45 1 3 109.27 9.04
 46 1 3 18.11 3.73
 46 -1 3 15.82 3.25
 47 -1 3 4.25 1.78
 47 1 3 4.57 1.8
 0 -2 -3 24.09 2.35
 0 2 -3 17.02 1.99
 1 2 -3 -0.11 0.47
 -1 2 -3 -0.68 0.46
 -1 -2 -3 -0.22 0.52
 1 -2 -3 0.42 0.52
 -2 -2 -3 31.15 2.74
 2 2 -3 28.13 2.77
 -2 2 -3 27.42 1.89
 -3 2 -3 -0.03 0.16
 -3 -2 -3 0.15 0.47
 3 -2 -3 -0.48 0.67
 3 2 -3 -1.11 0.83
 -4 -2 -3 0.33 0.56
 4 -2 -3 0.4 0.58
 4 2 -3 0.62 0.79
 -5 -2 -3 0.25 0.53
 5 -2 -3 1.05 0.83
 5 2 -3 0.8 0.82
 6 -2 -3 8.81 1.58
 6 2 -3 6.63 2.26
 7 -2 -3 3.18 1.27
 7 2 -3 4.42 1.68
 8 -2 -3 8.41 2.19
 8 2 -3 6.89 2.3
 9 -2 -3 0.81 0.81
 9 2 -3 0.33 1.16
 9 -2 3 0.22 0.23
 10 2 -3 17.65 4.04
 10 -2 -3 26.19 3.51
 11 -2 3 1.99 0.75
 11 2 -3 3.64 1.93
 12 -2 3 10.64 1.62
 12 2 -3 12.31 3.17
 12 -2 -3 14.45 2.83
 13 -2 -3 0.09 0.85
 13 -2 3 0.23 0.51
 13 2 -3 -0.45 0.97
 14 2 -3 15.82 3.23
 14 -2 3 10.69 1.74
 14 -2 -3 19.21 3.18
 15 -2 3 0.61 0.72
 15 -2 -3 2.23 1.48
 15 2 -3 2.82 1.71
 16 -2 -3 8.1 2.36
 16 -2 3 5.65 1.6
 16 2 -3 5.28 2.15
 17 -2 -3 -0.34 0.85
 17 -2 3 0.27 0.67
 17 -2 3 -0.45 0.54
 17 2 3 1.28 1.22
 17 2 -3 0.31 0.94
 18 -2 3 6.48 1.88
 18 2 3 8.24 2.56
 18 -2 -3 10.38 3.11
 18 -2 3 5.7 1.78
 18 2 -3 9.58 2.73
 19 2 -3 5.37 2.6
 19 -2 3 1.86 1.29
 19 -2 -3 4.05 1.78
 19 2 3 1.38 1.67
 20 -2 -3 47.05 6.21
 20 2 -3 44.94 6.43
 20 2 3 46.63 5.66
 21 -2 -3 4.7 2.19
 21 2 -3 5.29 2.41
 21 2 3 3.7 1.81
 22 2 3 36.47 5.37
 22 2 -3 44.16 6.25
 22 -2 -3 41.96 5.78
 23 -2 -3 1.92 1.68
 23 2 -3 0.18 1.45
 23 2 3 1.63 1.74
 24 2 3 21.85 4.76
 24 2 -3 33.69 5.84
 24 -2 -3 29.42 4.92
 25 -2 -3 -1.37 1.33
 25 2 -3 1.48 1.69
 26 -2 -3 10.58 4.36
 26 2 -3 14.01 4.9
 26 -2 -3 17.83 4.33
 27 -2 3 1.6 2.68
 27 -2 -3 0.44 1.52
 27 -2 -3 0.31 1.79
 27 2 -3 -0.75 1.79
 28 -2 -3 5.42 3.31
 28 2 -3 9.92 4.07
 28 -2 -3 9.21 3.3
 28 -2 3 18.3 5.4
 29 -2 -3 -0.23 1.33
 29 -2 -3 1.82 1.71
 29 -2 3 2.68 3.09
 29 2 -3 0.25 1.95
 30 -2 -3 0.09 2
 30 -2 3 3.52 2.99
 30 -2 -3 0.9 2.04
 30 2 -3 0.02 1.58
 31 -2 3 1.81 2.73
 31 -2 -3 -0.3 1.98
 31 -2 -3 0.17 1.72
 31 2 -3 -1.03 2.48
 32 2 -3 3.17 1.63
 32 -2 -3 2.73 1.89
 32 -2 3 4.17 4.6
 32 -2 -3 2.81 2.55
 33 2 -3 -1.4 2.11
 33 -2 -3 -0.69 2.42
 33 -2 3 -1.57 2.27
 33 -2 -3 3.14 2.65
 34 -2 -3 2.74 1.9
 34 -2 -3 2.48 2.47
 34 2 -3 -2.92 2.27
 34 -2 3 -2.74 3.21
 35 -2 -3 1.05 2.45
 35 2 -3 2.02 3.19
 35 2 3 0.31 2.69
 35 -2 3 2.53 3.06
 36 -2 -3 10.23 3.85
 36 2 3 7.76 3.87
 36 -2 3 12.07 4.41
 36 2 -3 4.41 3.77
 37 2 -3 5.26 3.76
 37 2 3 3.33 2.58
 37 -2 -3 7.51 3.82
 37 -2 3 7.98 4.04
 38 -2 -3 8.43 3.84
 38 -2 3 10.05 4.24
 38 2 -3 9.8 4.52
 38 2 3 10.4 4.84
 39 -2 3 -0.83 2.39
 39 2 -3 0.73 2.1
 39 -2 -3 2.17 1.51
 39 2 3 1.05 2.96
 40 2 -3 11.32 5.01
 40 -2 3 12.62 4.56
 40 2 3 19.77 5.98
 40 -2 -3 9.19 3.97
 41 -2 3 2.07 3.16
 41 2 -3 3.72 2.97
 41 2 3 -1.68 2.58
 42 -2 3 12.17 4.48
 42 2 -3 8.14 3.27
 42 2 3 9.65 3.53
 43 -2 3 1.61 2.57
 43 2 3 -4.66 2.97
 44 2 3 5.18 2.59
 44 -2 3 10.34 3.32
 45 -2 3 1.58 2
 45 2 3 -0.2 1.68
 46 2 3 4.27 2.44
 46 -2 3 2.77 1.52
 47 2 3 -2.09 2.19
 47 -2 3 1.42 1.77
 0 3 -3 0.03 0.46
 0 -3 -3 0.47 0.56
 1 -3 -3 54.77 3.01
 -1 3 -3 52.32 2.5
 -1 -3 -3 46.73 2.76
 2 -3 -3 -0.48 0.66
 -2 3 -3 0.13 0.35
 -2 -3 -3 0.13 0.61
 -3 -3 -3 753.4 10.53
 3 -3 -3 753.56 11.79
 4 -3 -3 2.43 1.04
 -4 -3 -3 2.34 0.92
 5 -3 -3 3575.99 26.67
 -5 -3 -3 3626.91 24.83
 6 -3 -3 13.81 2.05
 7 -3 -3 37.51 3.06
 8 -3 -3 126.31 5.82
 9 -3 -3 669.91 13.37
 10 -3 -3 51.52 4.06
 10 -3 3 16.62 1
 11 -3 -3 135.23 6.47
 11 -3 3 96.01 2.71
 12 -3 3 17.36 1.43
 12 -3 -3 28.17 3.29
 13 -3 -3 5.57 1.46
 13 -3 3 6.2 0.85
 14 -3 -3 3.33 1.44
 14 3 -3 2.34 1.32
 14 -3 3 1.32 0.62
 15 -3 3 9.53 1.25
 15 -3 -3 12.39 2.36
 15 3 -3 11.76 2.59
 16 -3 3 2.91 0.91
 16 -3 3 3.66 1
 16 -3 -3 4.49 1.88
 16 3 -3 4.8 1.93
 17 -3 3 49.07 3.2
 17 3 -3 63.09 5.91
 17 3 3 56.63 4.9
 17 -3 -3 56.8 4.97
 18 -3 -3 15.01 2.97
 18 -3 3 9.46 1.59
 18 3 3 12.16 2.52
 18 3 -3 15.67 3.28
 19 -3 -3 400.61 13.97
 19 3 3 384.44 13.24
 19 3 -3 404.28 15.01
 20 3 3 3.04 1.84
 20 -3 -3 2.25 1.41
 20 3 -3 6.01 2.41
 21 3 3 34.94 4.3
 21 -3 -3 37.29 4.54
 21 3 -3 38.41 5.14
 22 3 -3 5.05 2.75
 22 3 3 1.9 1.69
 22 -3 -3 3.9 2.28
 22 -3 3 3.88 2.59
 23 -3 -3 473.7 17.09
 23 3 -3 487.72 18.86
 23 -3 3 462.45 17.94
 23 3 3 471.56 16.35
 24 -3 -3 0.3 1.5
 24 -3 3 0.77 1.99
 24 3 3 1.44 1.42
 24 3 -3 -0.86 1.99
 24 -3 -3 1.72 1.58
 25 3 -3 804.6 26.01
 25 -3 -3 770.29 23.23
 26 -3 -3 4.58 2.16
 26 3 -3 9.08 3.18
 26 -3 3 7.42 3.04
 26 -3 -3 4.94 1.74
 27 -3 3 490.17 19.93
 27 3 -3 530.97 22.36
 27 -3 -3 491.95 19.69
 28 -3 3 -3.68 2.51
 28 -3 -3 2.42 2.34
 28 -3 -3 2.87 3.92
 28 3 -3 0.48 2.26
 29 -3 -3 93.3 8.96
 29 -3 -3 87.55 8.43
 29 3 -3 100.68 10.03
 29 -3 3 94.72 9.5
 30 3 -3 2.85 2.57
 30 -3 -3 1.07 2.03
 30 -3 -3 2.34 2.49
 30 -3 3 5.89 2.56
 31 -3 3 131.34 11.06
 31 -3 -3 130.28 10.67
 31 -3 -3 129.33 11.1
 31 3 -3 145.36 12.89
 32 3 -3 14.53 5.2
 32 -3 -3 11.27 4.07
 32 -3 3 11.61 4.01
 32 -3 -3 11.44 3.83
 33 3 -3 28.56 6.29
 33 -3 -3 30.57 5.19
 33 -3 3 32.71 6.08
 33 -3 -3 24.92 5.2
 34 3 -3 -0.37 2.07
 34 -3 -3 3.1 3.81
 34 -3 3 -1.39 2.7
 34 -3 -3 1.7 2.1
 35 -3 -3 4.17 2.71
 35 -3 3 10 4.73
 36 -3 -3 2.04 1.98
 36 -3 3 2.95 2.19
 36 3 -3 2.17 2.58
 37 -3 3 14.27 4.08
 37 3 -3 15.5 3.94
 37 -3 -3 17.71 4.21
 37 3 3 8.77 3.37
 38 -3 3 8.37 4.04
 38 3 -3 9.08 4.04
 38 3 3 9.2 4.4
 38 -3 -3 10.68 4.13
 39 -3 3 137 11.82
 39 3 -3 132.41 11.53
 39 -3 -3 121.62 10.45
 39 3 3 142.49 12.09
 40 -3 3 3.4 2.87
 40 3 3 4.03 2.55
 40 3 -3 0.34 2.24
 41 3 -3 217.49 13.87
 41 3 3 214.03 14.26
 41 -3 3 215.67 14.11
 42 -3 3 -0.18 1.94
 42 3 3 5.46 2.9
 42 3 -3 1.87 1.76
 43 3 3 191.76 12.91
 43 -3 3 190.57 12.43
 44 -3 3 7.22 2.62
 44 3 3 7.14 3.26
 45 3 3 37.06 5.33
 45 -3 3 42.74 5.57
 46 -3 3 2.09 1.32
 46 3 3 8.31 3.28
 47 -3 3 2.59 1.87
 47 3 3 -2.7 2
 0 -4 -3 77.14 5.14
 1 -4 -3 0.05 0.56
 -1 -4 -3 1.66 0.82
 2 -4 -3 0.33 0.58
 -2 -4 -3 1.14 0.7
 3 -4 -3 0.36 0.65
 -3 4 -3 0.82 0.43
 4 -4 -3 10.13 2.1
 -4 -4 -3 10.94 1.81
 -5 -4 -3 0.23 0.55
 5 -4 -3 -0.42 0.84
 6 -4 -3 1.7 1.18
 7 -4 -3 1.63 1.2
 8 -4 -3 51.59 4.58
 9 -4 -3 1.11 1.11
 10 -4 -3 31.7 3.59
 11 -4 -3 -0.03 0.87
 12 -4 -3 2.67 1.42
 12 -4 3 1.31 0.41
 13 -4 -3 0.94 1.11
 13 -4 3 0.35 0.32
 14 -4 3 7.5 1.05
 14 -4 -3 3.2 1.63
 15 -4 3 -0.32 0.33
 15 -4 -3 -0.43 0.89
 15 -4 3 -0.26 0.43
 16 -4 3 6.71 1.25
 16 -4 -3 5.03 2.09
 17 4 3 3.99 1.91
 17 4 -3 2.4 1.27
 17 -4 -3 3.46 1.92
 18 4 3 18.83 3.64
 18 -4 -3 24.12 4.35
 19 4 -3 0.49 1.37
 19 4 3 1.68 1.5
 19 -4 -3 0.83 1.22
 20 -4 3 6.18 2.32
 20 4 3 7.39 2.56
 20 -4 -3 7.46 2.62
 20 4 -3 5.81 2.65
 21 -4 -3 4.52 2.09
 21 -4 3 6.31 2.8
 21 4 3 -0.27 1.18
 21 4 -3 1.25 1.31
 22 4 3 4.91 2.53
 22 -4 -3 8.54 2.84
 22 -4 3 5.89 2.92
 22 4 -3 7.3 3.1
 23 -4 -3 3.69 2.11
 23 4 -3 3.8 2.54
 23 -4 -3 1.9 2.09
 23 -4 3 5.84 3.31
 23 4 3 3.94 2.01
 24 4 3 9.33 3.19
 24 -4 -3 10.58 3.5
 24 -4 3 14.48 4.3
 24 -4 -3 13.03 4.08
 24 4 -3 11.85 4.26
 25 -4 -3 -0.26 1.53
 25 -4 3 0.33 1.83
 25 -4 -3 -0.38 2.45
 25 4 3 -0.27 1.6
 25 4 -3 -1.09 2.02
 26 4 -3 15.24 4.17
 26 -4 -3 4.93 2.92
 26 -4 3 18.5 4.69
 26 -4 -3 8.31 2.83
 27 4 -3 -1.39 2.16
 27 -4 -3 -0.59 1.4
 27 -4 -3 -1.21 1.27
 28 -4 -3 7.28 3.41
 28 4 -3 9.96 3.85
 28 -4 -3 2.16 1.81
 28 -4 3 9.01 3.76
 29 4 -3 -0.05 2
 29 -4 -3 1.33 2.11
 29 -4 3 1.4 2.02
 29 -4 -3 1.11 1.75
 30 4 -3 1.36 2.36
 30 -4 3 4.54 3.11
 30 -4 -3 3.24 2.54
 30 -4 -3 1.6 2.94
 31 4 -3 -0.89 2.31
 31 -4 -3 1.23 1.58
 31 -4 3 0.29 2.06
 31 -4 -3 -2.19 1.95
 32 4 -3 0.62 1.78
 32 -4 -3 1.47 2.56
 32 -4 3 2.45 1.79
 32 -4 -3 1.52 2.03
 33 -4 -3 -0.44 2.06
 33 -4 3 -4.77 3.02
 33 -4 -3 -0.71 1.81
 33 4 -3 3.38 4.65
 34 -4 -3 5.97 2.96
 34 -4 3 0.6 2.21
 35 -4 3 -1.99 2.27
 35 -4 -3 1.05 2.58
 36 -4 -3 0.4 1.81
 36 -4 3 2.45 2.84
 37 -4 -3 -1.22 3.38
 37 -4 3 2.19 2.31
 37 4 -3 1.92 1.92
 38 -4 3 11.85 3.77
 38 4 -3 10.91 4.27
 38 4 3 3.34 3.58
 38 -4 -3 5.28 3.31
 39 -4 -3 3.41 3.04
 39 -4 3 7.45 3.66
 39 4 -3 8.19 4.2
 39 4 3 5.76 3.39
 40 4 -3 10.36 4.19
 40 -4 3 9.39 3.6
 40 4 3 11.59 4.39
 41 4 -3 1.32 2
 41 4 3 3.43 3.24
 41 -4 3 1.78 1.75
 42 -4 3 8.58 3.58
 42 4 -3 7.35 3.67
 42 4 3 13.65 4.72
 43 4 3 3.34 2.25
 43 -4 3 -0.25 1.56
 44 4 3 2.67 1.62
 44 -4 3 3.42 2
 45 -4 3 -2.05 1.61
 45 4 3 1.14 1.81
 46 4 3 2.45 2.44
 46 -4 3 0 1.48
 47 -4 3 1.7 1.43
 47 4 3 0.72 1.52
 0 -5 -3 -1.19 0.81
 -1 -5 -3 6133.12 35.41
 1 -5 -3 6331.21 36.27
 -2 -5 -3 32.15 2.83
 2 -5 -3 33.46 2.91
 3 -5 -3 862.86 13.55
 -3 -5 -3 846.17 13.1
 -4 -5 -3 4.95 1.31
 4 -5 -3 4.83 1.26
 5 -5 -3 118.89 5.16
 -5 -5 -3 116.76 5.03
 6 -5 -3 9.36 1.74
 7 -5 -3 166.88 6.48
 8 -5 -3 64.55 4.47
 9 -5 -3 1104.38 17.63
 10 -5 -3 100.63 5.93
 11 -5 -3 483.01 12.32
 12 -5 -3 11.21 2.22
 12 -5 3 3.33 0.44
 13 -5 3 375.69 5.28
 13 -5 -3 553.62 14.12
 14 -5 3 2.98 0.59
 14 -5 -3 6.79 2.04
 15 -5 -3 158.15 7.99
 16 -5 -3 1.28 0.95
 17 5 3 2693.01 35.81
 17 -5 -3 2701 35
 18 -5 -3 18.26 3.28
 18 5 3 14.09 2.78
 19 -5 -3 562.27 16.91
 19 5 3 548.82 16.78
 20 -5 3 1.57 1.42
 20 -5 -3 3.03 1.72
 20 5 3 1.05 1.15
 20 5 -3 1.81 1.46
 21 5 -3 175.75 11.25
 21 -5 3 173.37 10.88
 21 5 3 167.85 9.67
 21 -5 -3 171.78 9.72
 22 5 -3 28.01 4.79
 22 5 3 40.05 5.26
 22 -5 3 25.39 4.56
 22 -5 -3 27.91 4.32
 23 -5 -3 2.48 1.86
 23 -5 3 1.27 1.85
 23 5 -3 2.83 2.36
 23 -5 -3 0.78 1.23
 23 5 3 4.08 2.1
 24 -5 -3 3.95 2.29
 24 -5 3 8.85 3.53
 24 -5 -3 6.61 2.57
 24 5 3 6.25 2.49
 24 5 -3 10.28 3.5
 25 -5 3 309.62 15.24
 25 5 3 303.19 15
 25 5 -3 321.51 17.19
 25 -5 -3 313.03 14.8
 26 -5 -3 1.95 1.38
 26 -5 3 5.99 2.92
 26 -5 -3 8.36 2.89
 26 5 3 5.94 2.68
 26 5 -3 5.48 2.49
 27 -5 -3 133.83 10.42
 27 5 -3 162.43 13.03
 27 -5 3 160.86 11.47
 27 -5 -3 162.55 11.11
 28 -5 -3 1.32 1.22
 28 -5 -3 2.27 2.34
 28 -5 3 4.98 2.87
 28 5 -3 -2.61 2.96
 29 -5 3 21.46 4.35
 29 -5 -3 22.38 4.23
 29 -5 -3 20.76 3.86
 29 5 -3 26.93 5.64
 30 5 -3 -1.52 2.33
 30 -5 -3 0.88 1.49
 30 -5 3 -1.09 1.86
 30 -5 -3 -0.64 1.65
 31 5 -3 23.63 5.85
 31 -5 -3 14.28 3.33
 31 -5 3 15.62 4.15
 31 -5 -3 17.32 4.13
 32 -5 3 2.94 2.45
 32 -5 -3 2 2.48
 32 -5 -3 2.05 1.77
 32 5 -3 0.86 2.41
 33 -5 3 39.48 6.12
 33 5 -3 42.83 7.88
 33 -5 -3 35.15 5.56
 34 -5 -3 1.11 1.59
 34 -5 3 1.57 2.85
 35 -5 -3 124.89 10.74
 35 -5 3 137.07 11.76
 36 -5 3 -1.23 2.51
 36 -5 -3 -0.15 2.13
 37 -5 -3 114.29 9.89
 37 -5 3 136.06 11.85
 38 -5 3 5.54 3.85
 38 -5 -3 3.18 1.9
 38 5 -3 1.36 2.67
 39 5 -3 17.5 5.14
 39 -5 3 21.29 5.16
 39 5 3 18.8 4.65
 40 5 -3 4.41 1.74
 40 -5 3 3.77 2.56
 40 5 3 5.33 4.14
 41 5 -3 104.51 9.65
 41 -5 3 105.17 9.6
 41 5 3 102.39 10.01
 42 -5 3 3.87 2.5
 42 5 -3 4.96 3
 42 5 3 8.47 4.53
 43 -5 3 38.69 5.78
 43 5 3 38.41 5.96
 44 5 3 0.83 1.5
 44 -5 3 0.92 1.69
 45 5 3 2.48 1.59
 45 -5 3 1.55 1.98
 46 5 3 1.06 1.98
 46 -5 3 0.56 2.39
 47 5 3 27.84 4.09
 0 -6 -3 75.26 4.95
 1 -6 -3 1.39 1.07
 -1 -6 -3 1.12 0.85
 -2 -6 -3 2.74 1.17
 2 -6 -3 0.24 0.95
 3 -6 -3 -0.56 0.78
 -3 -6 -3 -0.14 0.73
 -4 -6 -3 36.3 3.53
 4 -6 -3 26.37 3.49
 5 -6 -3 -0.04 0.69
 -5 -6 -3 0.81 0.82
 6 -6 -3 13.17 2.63
 7 -6 -3 4.24 1.51
 8 -6 -3 4.54 1.66
 9 -6 -3 6.62 1.93
 10 -6 -3 4.28 1.58
 11 -6 -3 1.54 1.1
 12 -6 -3 1.94 0.84
 13 -6 -3 -0.26 1.04
 14 -6 -3 8.81 1.97
 15 -6 -3 -0.39 1.01
 16 -6 -3 44.86 5.17
 17 -6 -3 1.19 0.86
 17 6 3 -1.13 1.65
 18 -6 -3 15.75 4.03
 18 6 3 15.59 3.82
 19 6 3 2.35 1.21
 19 -6 3 0.18 1.56
 19 -6 -3 1.19 1.05
 20 -6 3 5.54 2.91
 20 6 3 3.47 1.88
 20 -6 -3 2.8 1.9
 21 -6 3 -0.16 1.7
 21 -6 -3 1.68 1.72
 21 6 3 -2.1 1.71
 22 -6 3 4.36 2.66
 22 -6 -3 1.54 2.14
 22 6 3 2.67 1.82
 22 6 -3 1.86 2.11
 22 -6 -3 4.44 2.21
 23 -6 -3 1.36 1.41
 23 6 3 2.37 1.87
 23 -6 3 1.57 1.49
 23 -6 -3 1.28 1.72
 23 6 -3 2.1 1.63
 24 6 -3 3.34 2.69
 24 -6 3 5.94 3.13
 24 6 3 1.82 2.19
 24 -6 -3 1.19 1.8
 24 -6 -3 4.94 2.71
 25 -6 -3 1.35 1.72
 25 -6 3 4.72 3.05
 25 -6 -3 1.82 1.82
 25 6 3 2.98 2.87
 25 6 -3 2.63 2.8
 26 -6 3 6.46 3.56
 26 6 3 1.45 1.45
 26 -6 -3 3.93 2.67
 26 -6 -3 3.69 1.97
 26 6 -3 2.17 2.31
 27 6 -3 -0.66 1.78
 27 -6 -3 1.73 1.45
 27 -6 3 0.86 1.8
 27 -6 -3 -0.9 1.59
 27 6 3 1.69 1.65
 28 6 -3 2.25 3.14
 28 -6 -3 -0.91 2.23
 28 -6 -3 -0.2 2.14
 28 -6 3 1.7 2.35
 29 -6 -3 -3.98 2.55
 29 -6 3 -0.31 2.22
 29 -6 -3 -3.98 2.19
 29 6 -3 -2.6 2.88
 30 -6 -3 0.4 1.58
 30 6 -3 -3.7 3.17
 30 -6 3 0.07 2.13
 30 -6 -3 0.39 3.08
 31 6 -3 1.79 2.51
 31 -6 -3 0.88 2.07
 31 -6 3 3.79 3.11
 31 -6 -3 2.16 1.81
 32 -6 -3 0.7 2.28
 32 -6 3 -0.09 2.25
 32 -6 -3 1.18 2.54
 32 6 -3 0.3 3.47
 33 -6 -3 3.95 2.38
 33 6 -3 -1.85 3.71
 33 -6 3 4.66 3.17
 34 -6 -3 4.32 3.09
 34 -6 3 12.62 4.67
 35 -6 -3 5.32 3.04
 35 -6 3 -1.27 2.15
 36 -6 -3 0.33 1.84
 36 -6 3 10.76 4.13
 37 -6 -3 1.71 2
 37 -6 3 2.06 2.13
 38 -6 3 5.72 2.98
 39 -6 3 5.74 3.17
 39 6 -3 1.75 3.18
 40 -6 3 1.17 2.48
 40 6 -3 4.2 2.85
 40 6 3 5.62 3
 41 6 3 4.41 3.11
 41 -6 3 4.95 2.74
 41 6 -3 5.62 3.55
 42 -6 3 3.29 2.23
 42 6 -3 1.97 2.58
 42 6 3 0.92 1.9
 43 -6 3 -0.25 1.97
 43 6 -3 -1.18 2.22
 43 6 3 -0.17 1.78
 44 -6 3 -0.66 1.83
 44 6 3 -1.79 2
 45 -6 3 1.77 2.48
 45 6 3 1.94 2.05
 46 -6 3 2.22 1.78
 46 6 3 0.4 1.87
 0 -7 -3 -0.37 0.71
 -1 -7 -3 2539.54 25.34
 1 -7 -3 2538.98 25.37
 -2 -7 -3 112.97 5.76
 2 -7 -3 132.72 6.02
 3 -7 -3 133.34 5.98
 -3 -7 -3 135.71 6.09
 -4 -7 -3 492.91 12.03
 4 -7 -3 490.43 11.84
 -5 -7 -3 8.4 1.84
 5 -7 -3 9.69 2.14
 6 -7 -3 177.37 7.38
 7 -7 -3 39.41 3.41
 8 -7 -3 1.14 0.76
 9 -7 -3 153.45 6.88
 10 -7 -3 5.88 1.64
 11 -7 -3 12.5 2.11
 12 -7 -3 15.92 2.91
 13 -7 -3 1097.7 20.33
 14 -7 -3 8.22 2.46
 15 -7 -3 2843.59 34.63
 16 7 3 10.27 2.41
 16 -7 -3 12.66 2.68
 17 7 3 1496.01 27.97
 17 -7 -3 1482.28 26.52
 18 -7 3 12.47 2.93
 18 -7 -3 12.81 2.71
 18 7 3 12.54 2.99
 19 -7 3 898.49 23.89
 19 7 3 880.95 22.81
 19 -7 -3 912.7 21.94
 20 7 3 23.11 3.98
 20 -7 -3 24.96 3.84
 20 -7 3 21.73 3.98
 21 -7 3 369.07 15.82
 21 -7 -3 368.91 14.63
 21 7 3 371.75 15.35
 22 -7 -3 -1.64 2.11
 22 -7 3 1.34 1.7
 22 -7 -3 2.69 1.6
 22 7 3 2.81 2.2
 23 -7 -3 8.03 2.51
 23 -7 3 7.75 2.26
 23 -7 -3 9.35 2.83
 23 7 3 8.14 2.93
 23 7 -3 10 3.42
 24 -7 -3 19.34 4.04
 24 -7 3 26 5.2
 24 -7 -3 22.04 3.9
 24 7 3 22.54 4.47
 24 7 -3 30.69 5.94
 25 -7 -3 0.46 1.49
 25 -7 3 2.27 2.15
 25 7 -3 6.39 4.35
 25 7 3 1.6 1.36
 25 -7 -3 5.01 3.06
 26 7 3 7.14 2.58
 26 -7 -3 6.29 2.65
 26 -7 3 9.29 3.39
 26 7 -3 13.51 4.94
 26 -7 -3 10.47 3.07
 27 -7 -3 18.8 4.25
 27 7 -3 22.6 5.29
 27 7 3 16.56 3.85
 27 -7 -3 17.94 3.88
 27 -7 3 17.87 4.16
 28 -7 3 -0.47 2.44
 28 -7 -3 2.47 2.5
 28 -7 -3 1.73 1.44
 28 7 -3 2.65 2.28
 29 -7 -3 18.56 4.3
 29 -7 3 15.08 3.87
 29 -7 -3 12.7 3
 29 7 -3 22 5.57
 30 7 -3 3.69 2.56
 30 -7 -3 3.93 1.66
 30 -7 3 5.05 2.73
 30 -7 -3 0.31 1.91
 31 -7 -3 41.94 6.02
 31 7 -3 51.27 8.39
 31 -7 -3 37.96 5.99
 31 -7 3 44.53 6.54
 32 7 -3 4.29 3.55
 32 -7 -3 0.16 1.82
 32 -7 3 2.15 2.09
 33 -7 -3 238.76 14.02
 33 -7 3 268.79 15.97
 34 -7 3 15.55 4.61
 34 -7 -3 14.54 3.63
 35 -7 3 326.71 17.5
 35 -7 -3 289.72 15.19
 36 -7 -3 0.93 1.49
 36 -7 3 0.62 1.79
 37 -7 -3 193.44 12.41
 37 -7 3 216.64 14.42
 38 -7 3 4.57 2.69
 39 -7 3 28.46 5.46
 40 -7 3 19.4 4.93
 40 7 -3 21.77 4.86
 40 7 3 23.34 5.39
 41 7 3 15.47 3.96
 41 7 -3 19.34 4.97
 41 -7 3 13.86 3.82
 42 -7 3 1.71 1.45
 42 7 -3 2.22 1.69
 42 7 3 4.89 2.81
 43 -7 3 7.12 2.92
 43 7 -3 6.47 2.2
 43 7 3 4.83 2.77
 44 7 3 4.33 2.96
 44 -7 3 0.81 1.92
 45 -7 3 9.98 3.17
 45 7 3 9.4 3.26
 46 -7 3 3.54 1.4
 46 7 3 3.76 2.29
 0 -8 -3 272.85 10.17
 1 -8 -3 40.1 4.23
 -1 -8 -3 38.04 3.99
 -2 -8 -3 77.3 5.44
 2 -8 -3 65.11 5.05
 -3 -8 -3 -0.85 1.1
 3 -8 -3 -1.06 1.06
 -4 -8 -3 0.41 0.7
 4 -8 -3 0.43 0.94
 5 -8 -3 0.85 0.94
 -5 -8 -3 0.94 1.08
 6 -8 -3 18.35 3.07
 7 -8 -3 -0.12 0.71
 8 -8 -3 3.26 1.37
 9 -8 -3 0.71 0.85
 10 -8 -3 6.52 2.01
 11 -8 -3 2.5 1.2
 12 -8 -3 13.96 3.07
 13 -8 -3 0.93 0.82
 14 -8 -3 38.02 4.81
 15 -8 -3 0.96 1.2
 16 8 3 17.06 3.93
 16 -8 -3 20.4 4.16
 17 -8 3 -0.15 1.97
 17 8 3 1.8 1.23
 17 -8 -3 -1.99 1.52
 18 8 3 45.38 5.95
 18 -8 -3 45.48 6.08
 18 -8 3 43.19 7.06
 19 -8 -3 -0.52 1.52
 19 8 3 0.65 1.38
 19 -8 3 -0.84 1.28
 20 -8 3 73.02 8.27
 20 8 3 64.43 7.56
 20 -8 -3 72.05 7.2
 21 -8 -3 1.22 1.64
 21 -8 3 2.48 2.29
 21 8 3 0.98 1.23
 21 -8 -3 3.17 1.57
 22 -8 3 37.77 6.68
 22 8 3 31.23 6.02
 22 -8 -3 40.38 5.69
 22 -8 -3 26.9 5.56
 23 8 3 1.63 1.76
 23 -8 -3 1.07 1.48
 23 -8 3 2.51 2.42
 23 -8 -3 1.73 1.58
 24 -8 3 21.39 5.1
 24 8 3 16.54 4.74
 24 -8 -3 13.9 3.96
 24 8 -3 17.86 5.52
 24 -8 -3 18.37 4.15
 25 -8 -3 -0.29 1.68
 25 -8 3 4.32 2.13
 25 8 3 0.05 1.41
 25 8 -3 -0.7 2.77
 25 -8 -3 -2 1.77
 26 -8 -3 14.88 4.28
 26 -8 3 17.83 5
 26 8 3 15.39 4.68
 26 8 -3 14.56 5.21
 26 -8 -3 17.73 4.49
 27 -8 -3 0.54 1.52
 27 -8 -3 -0.17 1.48
 27 -8 3 0.28 1.76
 27 8 3 -2.86 2.11
 27 8 -3 -1.77 2.72
 28 -8 -3 4.6 2.7
 28 8 -3 3.38 2.7
 28 8 3 5.99 3.12
 28 -8 -3 4.61 2.38
 28 -8 3 0.83 1.63
 29 -8 -3 3 2.3
 29 -8 3 -0.95 1.79
 29 -8 -3 -0.55 1.8
 29 8 -3 1.22 2.41
 30 8 -3 2.47 3.7
 30 -8 -3 2.44 1.86
 30 -8 3 5.23 3.11
 30 -8 -3 5.36 3.17
 31 -8 -3 2.11 1.83
 31 -8 3 3.03 2.11
 31 8 -3 2.9 2.49
 32 -8 -3 7.1 3.23
 32 -8 3 14.91 4.6
 32 8 -3 9.4 5.86
 33 -8 3 1.63 1.84
 33 -8 -3 0.63 1.55
 34 -8 -3 10.61 3.47
 34 -8 3 16.29 4.45
 35 -8 3 -0.86 2.25
 35 -8 -3 3.57 2.65
 36 -8 -3 15.71 3.97
 36 -8 3 17.83 4.69
 37 -8 3 -0.76 1.57
 38 -8 3 15.58 4.32
 39 -8 3 0.52 1.75
 40 -8 3 15.71 4.32
 40 8 -3 11.63 3.72
 41 -8 3 3.57 2.52
 41 8 -3 1.03 1.84
 41 8 3 0.94 2.24
 42 -8 3 8.86 2.89
 42 8 -3 5.65 3.02
 42 8 3 12.87 4.3
 43 -8 3 -1.33 1.59
 43 8 -3 -1.38 1.53
 43 8 3 0.02 1.72
 44 -8 3 3.7 2.45
 44 8 3 2.51 1.76
 45 -8 3 1.92 1.4
 45 8 3 8.81 3.69
 46 -8 3 9.72 2.56
 46 8 3 9.62 3.33
 0 -9 -3 -0.78 1.07
 -1 -9 -3 384.33 10.79
 1 -9 -3 368.53 10.35
 2 -9 -3 8.8 2.01
 -2 -9 -3 8.11 1.8
 -3 -9 -3 848.19 16.41
 3 -9 -3 997.07 17.29
 -4 -9 -3 90.01 5.6
 4 -9 -3 88.72 5.54
 5 -9 -3 5.18 1.58
 6 -9 -3 81.57 5.36
 7 -9 -3 173.55 7.54
 8 -9 -3 5.61 1.65
 9 -9 -3 31.51 3.32
 10 -9 -3 2.26 1.03
 11 -9 -3 14.6 2.44
 12 -9 -3 2.59 1.38
 13 -9 -3 1863.76 27.85
 14 -9 -3 1.15 1.14
 15 9 3 1056.8 24.09
 15 -9 -3 1043.21 21.92
 16 -9 -3 1.55 1.67
 16 -9 3 1.87 1.9
 16 9 3 0.76 1.28
 17 -9 3 1773.1 32.41
 17 9 3 1764.24 32.41
 17 -9 -3 1758.9 30.24
 18 -9 3 7.68 2.53
 18 9 3 4.35 2.27
 18 -9 -3 5.19 1.97
 19 -9 3 676.72 20.83
 19 9 3 686.51 21.31
 19 -9 -3 675.92 19.78
 20 -9 3 13.41 3.15
 20 -9 3 17.94 3.78
 20 -9 -3 14.71 3.22
 20 9 3 19.14 3.79
 20 -9 -3 19.87 3.57
 21 -9 -3 244.25 12.41
 21 -9 -3 201.34 11.12
 21 -9 3 243 13.02
 21 9 3 250.62 13.48
 21 -9 3 207.72 11.73
 22 -9 -3 6.32 2.27
 22 -9 -3 6.44 2.42
 22 -9 3 8.31 2.72
 22 9 3 9.05 3.16
 23 -9 3 34.96 5.39
 23 -9 -3 29.78 4.49
 23 9 3 32.71 5.26
 23 -9 -3 31.91 4.74
 24 -9 -3 8.49 2.6
 24 9 3 4.18 2.18
 24 -9 -3 9.88 3.34
 24 -9 3 11.88 3.55
 25 -9 -3 2.74 2.02
 25 -9 -3 0.65 1.52
 25 -9 3 2.49 2.7
 25 9 -3 -4.31 3.35
 25 9 3 0.14 1.72
 26 9 3 3.35 2.9
 26 -9 3 2.23 2.41
 26 -9 -3 3.78 2.47
 26 9 -3 6.16 3.47
 26 -9 -3 -0.91 1.68
 27 -9 -3 0.23 1.3
 27 -9 3 1.52 1.81
 27 9 3 0.86 1.61
 27 9 -3 3.54 3.65
 27 -9 -3 2.58 1.67
 28 -9 -3 5.84 1.97
 28 9 3 5.86 3.15
 28 -9 -3 6.87 3.07
 28 -9 3 5.83 2.67
 28 9 -3 7.8 3.82
 29 -9 -3 26.93 4.5
 29 9 3 23.57 5.31
 29 -9 3 29.87 5.4
 29 -9 -3 24.3 4.83
 29 9 -3 31.52 7.19
 30 -9 -3 2.67 2.13
 30 -9 3 4.48 2.3
 30 9 -3 -0.93 2.37
 31 9 -3 320.11 21.57
 31 -9 -3 286.03 14.77
 31 -9 3 314.09 16.6
 32 -9 3 9.16 3.32
 32 -9 -3 7.49 2.41
 33 -9 -3 400.18 17.58
 33 -9 3 437.37 19.66
 34 -9 -3 2.52 2.84
 34 -9 3 -0.45 1.8
 35 -9 3 409.68 19.19
 35 -9 -3 359.64 16.62
 36 -9 3 11.66 3.46
 37 -9 3 127.03 10.72
 38 -9 3 25.35 5.36
 39 -9 3 0.8 2.06
 40 -9 3 -1.18 1.99
 41 -9 3 4.67 2.54
 41 9 3 8.94 4.35
 41 9 -3 2.5 1.55
 42 -9 3 7.97 3
 42 9 -3 5.09 2.48
 42 9 3 9.16 3.64
 43 9 3 6.29 3.24
 43 9 -3 5.29 2.36
 43 -9 3 8.62 3.05
 44 -9 3 5.83 2.22
 44 9 3 7.01 1.96
 45 -9 3 4.38 2
 45 9 3 2.06 1.55
 0 -10 -3 38.51 4.53
 1 -10 -3 0.03 0.71
 -1 -10 -3 0.07 0.73
 -2 -10 -3 28.09 3.72
 2 -10 -3 29.26 3.66
 -3 -10 -3 -0.93 1.03
 3 -10 -3 0.55 0.9
 4 -10 -3 11.14 2.5
 -4 -10 -3 14.43 2.66
 5 -10 -3 -0.32 0.85
 6 -10 -3 0.36 1.05
 7 -10 -3 -0.17 0.84
 8 -10 -3 12.53 2.79
 9 -10 -3 3.12 1.36
 10 -10 -3 78.21 6.31
 11 -10 -3 0.75 1.16
 12 -10 -3 112.31 7.95
 13 -10 -3 1.36 1.31
 14 10 3 72.15 7.48
 14 -10 -3 75.76 6.74
 15 -10 -3 4.24 1.85
 15 -10 3 1.34 1.07
 15 10 3 -0.46 1.57
 16 -10 3 47.87 7.22
 16 -10 -3 51.6 6.2
 16 10 3 53.32 7.26
 17 -10 3 -2.61 1.92
 17 -10 3 -0.72 1.69
 17 -10 -3 -0.85 1.24
 17 10 3 0.18 1.29
 18 -10 3 39.39 6.52
 18 10 3 45.11 6.44
 18 -10 -3 38.31 5.58
 18 -10 3 30.88 5.73
 19 -10 3 -0.72 2.22
 19 -10 -3 1.31 1.09
 19 -10 -3 -1.56 1.83
 19 -10 3 0.16 1.77
 19 10 3 -3.83 1.72
 20 -10 -3 54.73 6.87
 20 -10 3 49.11 6.82
 20 10 3 48.36 7.11
 20 -10 3 41.77 6.62
 20 -10 -3 38.44 5.95
 21 -10 -3 1.19 1.39
 21 -10 3 -0.22 2.16
 21 -10 -3 1.23 1.56
 21 10 3 -0.5 1.56
 21 -10 3 0.66 1.44
 22 -10 -3 35.94 6.02
 22 10 3 42.05 7.05
 22 -10 3 51.58 7.28
 22 -10 -3 42.92 6.21
 22 -10 3 34.85 5.98
 23 -10 -3 -2.6 2.22
 23 -10 -3 0.23 1.68
 23 -10 3 2.16 2.36
 23 10 3 1.37 2.05
 23 -10 3 -2.45 2.4
 24 10 3 39.19 7.57
 24 -10 -3 45.55 6.37
 24 -10 3 50.38 7.54
 24 -10 -3 47.29 6.89
 25 -10 -3 -2.13 2.22
 25 10 3 -2.64 1.84
 25 -10 -3 -0.48 1.48
 25 -10 3 -0.4 2.01
 26 -10 -3 26.63 5.05
 26 -10 3 25.71 5.57
 26 10 3 29.32 6.27
 26 -10 -3 24.82 5.15
 26 10 -3 24.84 7
 27 -10 -3 -1.1 1.7
 27 -10 -3 0.9 2.06
 27 -10 3 -0.54 1.7
 27 10 3 -3.31 2.85
 27 10 -3 -0.73 2.63
 28 -10 -3 10.88 3.93
 28 -10 -3 16.27 4.3
 28 -10 3 16.7 4.34
 28 10 3 11.35 4.18
 28 10 -3 13.17 5.43
 29 -10 -3 3.21 2.39
 29 -10 3 -1.13 2.28
 29 10 3 1.25 2.98
 29 10 -3 0.39 2.57
 30 -10 -3 18.96 4.82
 30 -10 3 24.31 5.49
 30 10 -3 14.99 6.27
 31 10 -3 -1.04 2.31
 31 -10 3 0.46 2.27
 31 -10 -3 1.57 1.82
 32 -10 -3 17.83 4.47
 32 -10 3 19.74 5.07
 33 -10 -3 0.28 1.72
 33 -10 3 -2.03 2.04
 34 -10 -3 22.29 4.71
 34 -10 3 25.96 5.55
 35 -10 3 -0.03 1.68
 36 -10 3 53.46 7.6
 37 -10 3 -0.25 1.81
 38 -10 3 16.16 4.42
 39 -10 3 -1.61 1.98
 40 -10 3 6.32 2.72
 41 -10 3 0.38 1.38
 41 10 -3 2.51 1.76
 42 -10 3 6.01 2.71
 42 10 -3 3.89 2.81
 42 10 3 10.05 3.68
 43 -10 3 3.36 2.25
 43 10 -3 -1.03 1.16
 43 10 3 4.18 2.88
 44 -10 3 18.97 3.84
 44 10 3 15.08 4.55
 45 -10 3 0.23 1.19
 45 10 3 -0.89 1.88
 0 -11 -3 0.63 0.76
 -1 -11 -3 119.5 6.67
 1 -11 -3 116.28 6.46
 2 -11 -3 -0.53 0.99
 -2 -11 -3 2.83 1.28
 -3 -11 -3 231.65 9.34
 3 -11 -3 228.69 9.16
 4 -11 -3 23.77 3.12
 5 -11 -3 109.71 6.35
 6 -11 -3 29.75 3.67
 7 -11 -3 0.36 0.77
 8 -11 -3 15.56 2.72
 9 -11 -3 37.47 3.87
 10 -11 -3 4.58 1.55
 11 -11 -3 208.94 9.5
 12 -11 -3 3.2 1.77
 13 11 3 583.52 18.25
 13 -11 -3 580.64 16.77
 14 -11 3 -1.52 1.59
 14 11 3 0.05 1.13
 14 -11 -3 0.2 1.2
 15 -11 3 506.45 17.23
 15 -11 -3 530.14 16.69
 15 11 3 523.39 18.09
 15 -11 3 516.86 18.45
 16 -11 3 -1.35 1.42
 16 -11 3 2.87 1.71
 16 -11 -3 1.88 1.46
 16 11 3 0.9 1.18
 17 -11 3 961.98 24.64
 17 11 3 998.33 26.38
 17 -11 3 966.69 26.12
 17 -11 -3 1022.1 24.27
 18 -11 3 1.33 1.66
 18 -11 -3 3.34 1.84
 18 -11 3 3.33 2.06
 18 -11 -3 -1.34 2.19
 18 11 3 0.84 1.35
 19 -11 -3 443.95 16.53
 19 11 3 508.32 19.71
 19 -11 3 482.99 18.73
 19 -11 3 504.4 18.42
 19 -11 -3 515.01 18.05
 20 -11 3 8.21 3.06
 20 11 3 10.13 3.59
 20 -11 3 11.91 3.3
 20 -11 -3 10.13 2.71
 20 -11 -3 9.49 2.78
 21 -11 -3 45.55 5.56
 21 -11 3 51.99 6.44
 21 11 3 47.41 6.47
 21 -11 -3 50.75 5.9
 21 -11 3 46.73 5.75
 22 -11 3 12.04 3.72
 22 -11 -3 7.79 2.57
 22 -11 -3 8.89 2.67
 22 -11 3 5.25 2.68
 22 11 3 6 2.26
 23 -11 3 8.05 3.06
 23 -11 3 9.88 3.42
 23 -11 -3 7.84 2.69
 23 -11 -3 7.5 2.39
 23 11 3 9.78 3.18
 24 -11 -3 0.21 1.13
 24 -11 3 4.06 2.06
 24 -11 -3 1.28 1.52
 24 11 3 3.62 3.04
 24 -11 3 3.22 1.58
 25 -11 -3 57.89 6.7
 25 11 3 58.48 7.96
 25 -11 -3 51.34 6.5
 25 -11 3 54.57 6.88
 26 -11 3 4.7 2.74
 26 -11 -3 4.87 2.19
 26 -11 -3 4.29 2.62
 26 11 3 3.42 2.01
 27 -11 -3 9.6 3.34
 27 -11 3 10.16 3.08
 27 -11 -3 8.96 2.96
 27 11 3 9.38 3.65
 27 11 -3 6.74 3.6
 28 -11 -3 0.91 1.51
 28 -11 3 -0.22 1.71
 28 11 3 2.28 2.8
 28 11 -3 -0.36 2.29
 29 -11 3 54.96 7.2
 29 11 3 43.66 7.15
 29 11 -3 58.01 9.8
 29 -11 -3 54.45 6.68
 30 -11 -3 7.2 2.56
 30 -11 3 9.16 3.66
 30 11 3 3.72 2.94
 30 11 -3 1.12 2.42
 31 -11 3 264.4 15.33
 31 -11 -3 255.94 14.09
 32 -11 -3 -0.1 1.66
 32 -11 3 3.4 5.5
 33 -11 3 589.92 22.83
 33 -11 -3 527.66 20.38
 34 -11 3 4.78 2.41
 35 -11 3 363.75 17.89
 36 -11 3 19.64 4.85
 37 -11 3 4.18 2.57
 38 -11 3 -1.56 1.99
 39 -11 3 2.66 1.9
 40 -11 3 3.33 2.57
 41 -11 3 55.13 6.7
 42 -11 3 -0.15 1.42
 42 11 3 1.83 2.2
 42 11 -3 -0.8 1.44
 43 -11 3 37.91 5.22
 43 11 3 41.81 6.06
 44 -11 3 3.36 1.79
 44 11 3 2.58 1.66
 0 -12 -3 12.33 2.52
 -1 -12 -3 0.15 0.9
 1 -12 -3 0.88 1.07
 2 -12 -3 6.04 1.76
 -2 -12 -3 5.58 2
 3 -12 -3 -0.07 0.91
 4 -12 -3 5.17 1.98
 5 -12 -3 1.81 1.45
 6 -12 -3 2.29 1.45
 7 -12 -3 2.91 1.57
 8 -12 -3 20.45 3.64
 9 -12 -3 1.25 1
 10 -12 -3 14.65 3.25
 11 12 3 -0.17 1.34
 11 -12 -3 1.09 1.03
 12 -12 -3 39 4.96
 12 12 3 45.46 6.23
 12 -12 3 33.78 5.26
 12 -12 3 34.51 5.51
 13 -12 3 -0.97 1.73
 13 12 3 0.73 1.46
 13 -12 3 0.04 1.27
 13 -12 -3 0.28 1.08
 14 -12 3 34.9 5.37
 14 -12 -3 34.64 5.03
 14 -12 3 33.69 6.1
 14 12 3 36.12 6.03
 15 -12 -3 1.2 1.37
 15 -12 3 -1.47 1.29
 15 12 3 -1.48 1.58
 15 -12 3 -2.53 2.12
 16 -12 3 28.34 4.96
 16 -12 -3 23.51 4.89
 16 -12 -3 31.54 4.82
 16 12 3 23.33 5.66
 16 -12 3 22.49 5.27
 17 -12 -3 5.47 3.37
 17 -12 3 3.19 1.81
 17 -12 3 3.01 3.03
 17 12 3 3.05 1.75
 17 -12 -3 3.33 2.14
 18 -12 -3 18.66 5.12
 18 -12 3 13.34 3.96
 18 -12 -3 16.83 3.95
 18 12 3 15.26 4.67
 18 -12 3 16.71 4.55
 19 -12 3 2.21 2.89
 19 -12 3 0.02 1.48
 19 -12 -3 1.18 1.14
 19 -12 -3 0.76 1.51
 19 12 3 -0.25 1.5
 20 12 3 8.28 3.38
 20 -12 -3 5.79 2.44
 20 -12 -3 3.79 2.6
 20 -12 3 6.46 2.83
 20 -12 3 5.63 2.2
 21 12 3 3.89 2.93
 21 -12 -3 1.04 1.65
 21 -12 -3 -0.58 1.03
 21 -12 3 2.81 2.31
 21 -12 3 -0.76 2.41
 22 -12 3 13.47 3.97
 22 -12 -3 8.25 3.1
 22 12 3 11.32 3.82
 22 -12 3 8.78 3.46
 22 -12 -3 9.03 2.73
 23 12 3 -1.55 1.52
 23 -12 -3 -0.77 1.06
 23 -12 3 -2.38 1.89
 23 -12 3 -3.04 2.39
 23 -12 -3 -1.94 1.41
 24 -12 3 20.84 4.89
 24 -12 -3 25.36 4.8
 24 -12 -3 18.8 4.26
 24 12 3 25.56 5.93
 24 -12 3 27.99 5.55
 25 -12 -3 5.67 3.23
 25 -12 -3 3.09 2.53
 25 -12 3 0.72 1.92
 25 12 3 -0.23 1.9
 25 -12 3 -0.68 1.93
 26 -12 -3 7.24 2.85
 26 -12 -3 9.25 3.24
 26 -12 3 11.36 3.85
 26 12 3 17 5.59
 27 -12 -3 2.96 2.03
 27 -12 3 -0.25 2.12
 27 12 -3 3.25 2.35
 27 12 3 -1.45 2.39
 28 -12 3 4.88 2.63
 28 -12 -3 1.91 2.12
 28 12 3 0.78 1.98
 28 12 -3 2.92 3.55
 29 -12 -3 3.96 2.45
 29 -12 3 1.39 3.32
 29 12 3 0.75 2.4
 29 12 -3 -0.78 3.42
 30 -12 -3 5.22 2.56
 30 -12 3 3.34 2.55
 31 -12 -3 0.15 1.68
 31 -12 3 13.96 7.23
 32 -12 3 14.88 4.72
 32 -12 -3 12.41 3.46
 33 -12 3 -2.11 2.27
 34 -12 3 32.47 5.76
 35 -12 3 -2.2 1.86
 36 -12 3 0.24 1.91
 37 -12 3 2.99 1.95
 38 -12 3 -1.27 1.69
 39 -12 3 1.96 1.67
 40 -12 3 -0.06 1.65
 41 -12 3 -3.17 1.96
 42 12 3 1.01 1.8
 42 -12 3 5.43 2.6
 42 12 -3 1.93 2.51
 43 -12 3 -1.51 1.22
 43 12 3 -1.39 1.99
 44 -12 3 3.8 1.9
 44 12 3 3.77 2.54
 0 -13 -3 -1.35 1
 -1 -13 -3 296.24 11.52
 1 -13 -3 322.41 12.17
 -2 -13 -3 25.81 3.53
 2 -13 -3 22.96 3.4
 3 -13 -3 19.87 2.96
 4 -13 -3 5.46 1.61
 5 -13 -3 4.65 1.57
 6 -13 -3 1.7 1.1
 7 -13 -3 95.74 6.48
 8 -13 -3 1.74 1.51
 9 -13 3 374.81 14.13
 9 -13 -3 374.98 15.52
 9 -13 -3 384.36 13.55
 9 -13 3 378.65 15.06
 10 -13 3 7.55 2.83
 10 13 3 5.16 2.42
 10 -13 -3 6.37 2.28
 10 -13 -3 10.02 3.52
 10 -13 3 8.63 2.79
 11 13 3 55.24 6.08
 11 -13 -3 50.82 5.12
 11 -13 3 48.56 5.39
 11 -13 3 58.77 6.15
 12 -13 3 5.52 2.76
 12 -13 -3 7.43 2.21
 12 -13 3 6.03 2.31
 12 13 3 6.56 2.65
 13 13 3 7.94 2.24
 13 -13 3 6.92 2.57
 13 -13 3 4.2 2.15
 13 -13 -3 6.18 1.79
 14 -13 -3 4.26 1.6
 14 -13 3 7.59 2.87
 14 13 3 3.53 1.74
 14 -13 3 6.98 3.12
 14 -13 3 10.03 3.66
 15 -13 -3 223.57 11.53
 15 13 3 210.32 12.5
 15 -13 3 222.16 12.68
 15 -13 -3 190.32 10.97
 15 -13 3 196.25 11.3
 16 -13 3 2.94 1.84
 16 13 3 2.15 1.31
 16 -13 -3 -1.36 1.64
 16 -13 3 1.81 1.45
 16 -13 -3 -0.44 1.29
 17 -13 -3 184.22 11.24
 17 -13 3 200.3 11.64
 17 13 3 205.5 12.78
 17 -13 -3 218.16 11.97
 17 -13 3 211.52 12.63
 18 -13 3 3.04 2.29
 18 -13 -3 4.01 2.52
 18 -13 3 0.79 1.73
 18 13 3 0.74 1.54
 18 -13 -3 3.87 2.05
 19 -13 3 441.28 17.71
 19 -13 -3 435 17.51
 19 13 3 419.86 18.96
 19 -13 3 457.02 18.74
 19 -13 -3 397.54 16.64
 20 -13 -3 4.76 2.29
 20 13 3 7.53 3.23
 20 -13 3 3.71 2.75
 20 -13 -3 2.84 2.22
 20 -13 3 2.81 2.25
 21 -13 3 39.27 5.85
 21 -13 -3 41.21 5.57
 21 13 3 37.63 5.97
 21 -13 3 41.28 6.02
 21 -13 -3 38.35 5.49
 22 -13 3 4.47 2.47
 22 13 3 4.74 2.93
 22 -13 -3 3.67 1.78
 22 -13 -3 1.41 1.65
 22 -13 3 2.44 1.74
 23 -13 3 167.4 11.16
 23 -13 -3 145.25 10.53
 23 -13 -3 152.51 11.04
 23 13 3 156.93 12.88
 23 -13 3 167.64 11.46
 24 13 3 1.32 2.19
 24 -13 -3 -2.48 2.06
 24 -13 3 0.89 1.96
 24 -13 -3 -0.75 1.41
 24 -13 3 -0.32 1.88
 25 -13 3 258.2 14.76
 25 -13 -3 242.01 13.88
 25 -13 -3 206.34 13.54
 25 13 3 262.13 17.38
 25 -13 3 243.21 14.02
 26 -13 -3 8.17 3.19
 26 -13 3 4.49 2.25
 26 13 3 3.11 2.56
 27 -13 -3 73.43 8.01
 27 13 3 71.31 9.12
 27 -13 3 81.16 8.63
 28 -13 -3 0.87 1.44
 28 -13 3 1.71 1.88
 28 13 3 3.66 4.75
 28 13 -3 3.88 3.04
 29 -13 -3 1.02 1.44
 29 -13 3 2.86 2.13
 29 13 3 2.97 2.82
 30 -13 -3 16.22 4.02
 30 -13 3 36.88 8.58
 31 -13 -3 101.39 8.74
 31 -13 3 106.76 9.84
 32 -13 3 0.22 1.57
 33 -13 3 330.06 17.37
 34 -13 3 -0.28 2.09
 35 -13 3 58.07 7.28
 36 -13 3 1.73 1.6
 37 -13 3 9.91 3.42
 38 -13 3 1.27 1.57
 39 -13 3 60.54 7.11
 40 -13 3 5.04 2.4
 41 -13 3 159.34 10.63
 42 13 -3 1.57 1.78
 42 -13 3 0.98 1.81
 43 -13 3 120.02 8.55
 43 13 3 133.42 10.48
 0 -14 -3 44.33 5.55
 1 -14 -3 0.49 0.91
 -1 -14 -3 0.95 1.1
 2 -14 -3 70.75 6.75
 3 -14 -3 2.97 1.63
 4 -14 -3 91.18 7.47
 5 -14 3 2.01 1.17
 5 -14 -3 -1.71 1.25
 5 -14 3 -1.21 1.71
 6 -14 3 39.6 5.44
 6 -14 -3 58.79 7.04
 6 -14 -3 55.27 5.77
 6 -14 3 40.08 6.04
 7 -14 -3 -1.14 2.1
 7 -14 3 -0.43 1.22
 7 -14 -3 -0.36 0.99
 7 -14 3 0.78 1.82
 8 14 3 31.03 5.5
 8 -14 3 29.81 4.97
 8 -14 -3 31.25 4.39
 8 -14 -3 33.97 5.77
 8 -14 3 28.09 5.38
 9 -14 3 -1.42 1.24
 9 14 3 0.13 1.49
 9 -14 -3 -0.37 1.73
 9 -14 -3 0.23 0.91
 9 -14 3 -1.17 1.54
 10 -14 3 20.91 4.92
 10 -14 3 21.11 4.33
 10 -14 3 19.89 4.34
 10 -14 -3 25.37 4
 10 14 3 23.44 4.71
 10 -14 -3 20.14 4.39
 11 -14 -3 1.38 1.56
 11 14 3 2.16 1.62
 11 -14 3 1.29 1.45
 11 -14 3 0.56 2.03
 11 -14 3 1 1.83
 12 -14 3 5.38 2.92
 12 -14 3 5.26 2.8
 12 -14 -3 5.81 2.1
 12 -14 -3 4.54 2.13
 12 14 3 3.43 2.04
 12 -14 3 6.2 3.41
 13 -14 -3 1.09 1.6
 13 -14 3 -0.56 1.67
 13 -14 3 -0.2 1.81
 13 -14 -3 1.4 0.98
 13 14 3 0.65 1.64
 13 -14 3 -0.23 2.08
 14 -14 3 3.61 2.35
 14 -14 -3 3.66 1.87
 14 -14 3 2.92 2.27
 14 14 3 4.07 2.2
 14 -14 3 4.59 2.36
 14 -14 -3 6.16 2.48
 15 -14 -3 2.41 1.74
 15 -14 3 4.81 2.82
 15 -14 3 5.05 2.17
 15 -14 3 0.54 2.45
 15 -14 -3 3.29 2.57
 15 14 3 -1.14 1.82
 16 -14 3 28.03 5.5
 16 -14 -3 28.42 4.65
 16 -14 3 28.93 5.63
 16 14 3 25.63 5.49
 16 -14 -3 24.59 4.72
 17 -14 -3 -0.16 1.69
 17 14 3 4.52 2.41
 17 -14 -3 4.03 1.65
 17 -14 3 0.45 2.38
 17 -14 3 2.56 2.21
 18 -14 3 26.37 5.54
 18 -14 -3 26.14 5.51
 18 -14 3 26.49 4.97
 18 -14 -3 24.56 4.67
 18 14 3 24.21 5.44
 19 -14 3 3.13 2.53
 19 14 3 1.34 2.32
 19 -14 3 1.1 2.4
 19 -14 -3 2.98 2.18
 19 -14 -3 -0.59 1.67
 20 -14 -3 6.09 3.11
 20 -14 3 5.38 2.63
 20 14 3 4.71 3.31
 20 -14 -3 3.65 2.01
 20 -14 3 4.98 1.94
 21 14 3 0.63 1.59
 21 -14 -3 -1.3 1.98
 21 -14 3 2.06 1.92
 21 -14 3 0.04 1.92
 21 -14 -3 0.04 1.12
 22 -14 -3 10.73 3.37
 22 -14 3 6.96 3.31
 22 14 3 13.89 4.64
 22 -14 -3 13.85 3.97
 22 -14 3 8.39 3.44
 23 -14 -3 3.93 2.1
 23 -14 3 2.27 2.03
 23 14 3 -0.05 1.9
 23 -14 3 3.1 2.5
 23 -14 -3 0.02 1.09
 24 -14 3 23.17 5.29
 24 14 3 36.67 7.28
 24 -14 3 24.78 5.36
 24 -14 -3 38.72 6.23
 24 -14 -3 18.16 4.58
 25 -14 -3 2.09 1.93
 25 -14 3 -1.43 2.46
 25 14 3 3.73 3.12
 26 -14 3 36.2 6.6
 26 14 3 31.48 7.28
 26 -14 -3 40.05 6.32
 27 -14 -3 3.4 1.79
 27 -14 3 6.1 3.23
 27 14 3 2.59 2.86
 28 -14 -3 23.21 4.82
 28 -14 3 29.73 5.5
 29 -14 3 10.87 5.8
 29 -14 -3 -0.84 2.3
 30 -14 -3 14.53 3.9
 30 -14 3 19.97 5.1
 31 -14 3 -0.85 1.65
 32 -14 3 7.67 4
 33 -14 3 5.58 3.01
 34 -14 3 10.47 3.72
 35 -14 3 1.57 2.36
 36 -14 3 20.83 4.75
 37 -14 3 0.46 1.71
 38 -14 3 15.39 4.21
 39 -14 3 0.55 1.26
 40 -14 3 17.64 4.09
 41 -14 3 -3.8 2.29
 42 -14 3 15.12 3.47
 43 14 3 3.89 2.86
 0 -15 3 -0.23 1.45
 0 -15 -3 -0.17 1.56
 0 -15 3 -2.12 2.11
 0 -15 -3 -0.52 0.95
 1 -15 -3 28.57 4.51
 1 -15 3 28.13 4.21
 -1 -15 -3 31.9 4.66
 1 -15 3 29.34 4.05
 -1 -15 3 29.22 4.06
 1 -15 -3 26.98 3.92
 2 -15 3 0.58 1.91
 -2 -15 3 0.22 1.33
 2 -15 -3 3.82 2.35
 -2 -15 -3 -1.81 2.54
 2 -15 3 3.41 1.35
 2 -15 -3 4.7 1.72
 -3 -15 3 0.35 1.43
 3 -15 3 1.46 1.29
 3 -15 3 -0.12 1.63
 3 -15 -3 2 1.04
 3 -15 -3 0.83 1.63
 -4 -15 -3 5.39 2.07
 4 -15 -3 6.05 2.25
 4 -15 3 4.38 2.32
 -4 -15 3 7.29 2.39
 4 15 3 4.01 2.6
 4 -15 -3 6.34 3.31
 4 -15 3 4.82 2.34
 5 -15 -3 749.86 20.01
 5 -15 -3 746.75 22.72
 5 -15 3 665.96 21.12
 5 -15 3 690.88 20.91
 5 15 3 738.51 24.95
 5 -15 3 681.22 19.41
 6 -15 -3 0.32 1.67
 6 15 3 1.57 1.75
 6 -15 3 -0.04 1.48
 6 -15 -3 -0.42 1.31
 6 -15 3 1.57 2.21
 6 -15 3 -0.22 1.65
 7 -15 -3 379.56 14.45
 7 -15 3 353.16 15.44
 7 15 3 405.5 17.57
 7 -15 -3 389.23 16.81
 7 -15 3 343.02 14.96
 7 -15 3 340.61 14
 8 -15 -3 3.38 1.65
 8 -15 3 2.27 1.92
 8 -15 -3 5.5 2.41
 8 15 3 0.51 1.71
 8 -15 3 4.72 2.07
 8 -15 3 1.98 1.2
 9 -15 3 514.38 17.19
 9 -15 -3 585.23 20.49
 9 15 3 591.16 21.28
 9 -15 3 506.49 18.97
 9 -15 -3 573.83 17.96
 9 -15 -3 524.93 18.25
 9 -15 3 485.45 18.1
 10 -15 -3 1.88 1.76
 10 -15 3 -2.11 2.38
 10 -15 3 2.15 2.61
 10 15 3 -0.84 1.84
 10 -15 -3 3.79 3.01
 10 -15 3 4.66 1.99
 10 -15 -3 -0.92 2.52
 11 -15 -3 478.62 17.19
 11 -15 -3 482.15 19.36
 11 15 3 498.69 19.75
 11 -15 3 459.07 16.59
 11 -15 3 462.67 18.62
 11 -15 -3 468.31 17.23
 11 -15 3 444.13 17.68
 12 -15 3 14.77 3.59
 12 -15 -3 14.61 3.54
 12 -15 3 14.41 3.53
 12 15 3 16.73 3.88
 12 -15 -3 16.92 3.59
 12 -15 3 14.7 3.37
 13 -15 -3 131.46 9.18
 13 15 3 128.2 10.47
 13 -15 3 120.06 8.94
 13 -15 3 127.58 10.25
 13 -15 3 126.29 9.51
 13 -15 -3 125.98 9.31
 14 -15 -3 6.03 2.45
 14 -15 3 1.2 2.03
 14 -15 -3 2.76 1.94
 14 15 3 5.91 2.69
 14 -15 3 -0.56 2.21
 14 -15 3 5.24 2.65
 15 -15 3 7.89 2.85
 15 -15 3 6.99 3.09
 15 -15 3 7.19 3.45
 15 -15 -3 8.38 2.95
 15 -15 -3 8.55 2.97
 15 15 3 8.93 3.03
 16 -15 -3 11.34 3.28
 16 -15 3 15.59 4.03
 16 -15 -3 15.48 3.42
 16 15 3 8.66 3.02
 16 -15 3 14.65 3.54
 17 15 3 42.67 6.51
 17 -15 -3 53.65 6.32
 17 -15 -3 46.2 5.8
 17 -15 3 46.39 6.12
 17 -15 3 48.13 6.21
 18 -15 3 2.16 1.57
 18 -15 -3 7.94 2.55
 18 -15 3 9.44 3.91
 18 -15 -3 3.23 2.42
 18 15 3 3.74 2.03
 19 -15 3 18.68 4.18
 19 15 3 15.02 4.39
 19 -15 -3 18.01 3.86
 19 -15 -3 16.22 3.65
 19 -15 3 16.18 4.16
 20 -15 -3 1.46 1.78
 20 -15 -3 3.21 2.06
 20 -15 3 2.88 1.95
 20 15 3 5.74 2.96
 20 -15 3 3 2.23
 21 -15 -3 51.41 6.42
 21 -15 -3 49.99 6.28
 21 15 3 48.26 7.23
 21 -15 3 51.09 6.48
 21 -15 3 51.24 6.5
 22 -15 -3 9.3 3.52
 22 -15 3 5.64 2.8
 22 15 3 8.79 3.27
 22 -15 3 0.03 2.05
 22 -15 -3 2.81 1.55
 23 15 3 320.57 19.46
 23 -15 3 335.95 17.34
 23 -15 -3 335.1 16.32
 23 -15 3 316.28 16.61
 24 -15 -3 -2.18 2.38
 24 -15 3 1.29 2.41
 24 15 3 0.93 2.02
 24 -15 3 2.77 2.58
 25 -15 -3 463.1 19.23
 25 -15 3 488.76 20.42
 25 15 3 457.68 24.39
 26 -15 3 8.28 3.55
 26 -15 -3 2.48 1.98
 26 15 3 9.69 4.42
 27 -15 -3 341.21 16.72
 27 -15 3 353.32 17.56
 28 -15 -3 19.48 4.21
 28 -15 3 49.53 6.86
 29 -15 3 50.21 7.05
 29 -15 -3 51.04 6.36
 30 -15 -3 6.22 2.63
 30 -15 3 7.22 3.41
 31 -15 3 45.31 6.52
 32 -15 3 2.73 2.42
 33 -15 3 4.54 2.81
 34 -15 3 7.64 2.9
 35 -15 3 37.7 5.82
 36 -15 3 1.66 2.38
 37 -15 3 6.07 2.65
 38 -15 3 4.14 2.24
 39 -15 3 105.54 8.92
 40 -15 3 0.24 1.29
 41 -15 3 209.69 11.46
 42 -15 3 4.92 2.23
 0 16 3 195.17 16.15
 0 -16 -3 193.1 12.92
 0 -16 3 220.13 12.82
 0 -16 3 242.24 12.75
 -1 -16 3 -2.66 1.99
 -1 -16 3 -0.88 1.61
 1 -16 3 0.49 1.4
 1 -16 -3 -0.61 2.86
 1 16 3 1.21 2.37
 1 -16 3 1.87 1.97
 -1 -16 -3 1.14 2.12
 1 -16 -3 0.42 2.19
 -1 16 3 4.09 2.52
 2 -16 -3 106.22 8.74
 2 -16 -3 98.55 9.39
 -2 16 3 98.52 11.87
 2 16 3 107.29 11.31
 2 -16 -3 105.68 9.74
 -2 -16 -3 101.06 9.39
 -2 -16 3 122.35 9.21
 2 -16 3 99.29 9.39
 2 -16 3 99.08 8.5
 -2 -16 3 97.24 9.14
 3 -16 3 -1.09 1.43
 -3 -16 3 1.07 1.41
 -3 -16 3 2.7 2.23
 3 -16 -3 4.17 1.67
 -3 16 3 3.37 2.08
 3 16 3 -0.34 2.41
 -3 -16 -3 0.24 1.9
 3 -16 -3 -0.61 1.72
 3 -16 -3 0.36 2.31
 -4 -16 -3 84.22 8.91
 4 -16 3 71.18 8.09
 -4 -16 3 100.21 8.23
 4 16 3 101.73 10.74
 -4 16 3 88.51 11.58
 4 -16 3 87.55 8.59
 4 -16 -3 98.89 11.16
 4 -16 -3 82.61 7.7
 -4 -16 3 60.47 7.41
 4 -16 3 89.24 8.1
 4 -16 -3 106.01 9.14
 5 -16 3 0.31 1.76
 -5 -16 3 -2.28 2.25
 5 -16 -3 1.37 1.65
 -5 16 3 0.65 1.7
 5 16 3 -3.17 2.76
 5 -16 3 -2 2.09
 5 -16 3 -1.36 1.86
 5 -16 -3 -3.05 2.95
 5 -16 -3 3.67 2.02
 6 -16 -3 195.3 12.62
 6 -16 -3 175.8 13.79
 6 -16 3 191.24 13.17
 6 -16 3 175.67 12.24
 6 16 3 214.25 15.16
 6 -16 -3 184.74 11.57
 6 -16 3 204.99 12.06
 7 -16 -3 -4.26 2.86
 7 16 3 -4.02 2.86
 7 -16 3 2.47 2.45
 7 -16 3 -3.96 2.47
 7 -16 -3 0.57 1.63
 7 -16 3 -0.27 1.66
 7 -16 -3 -5.74 2.92
 8 -16 -3 151.18 10.98
 8 -16 -3 121.75 9.61
 8 -16 3 116.07 9.44
 8 16 3 145.87 12.28
 8 -16 -3 159.95 12.83
 8 -16 3 143.06 11.68
 8 -16 3 114.94 10.61
 9 -16 3 -5 2.93
 9 -16 3 0.61 1.75
 9 16 3 -2.69 2.15
 9 -16 -3 -4.62 3.01
 9 -16 -3 0.45 1.46
 9 -16 3 -1.78 1.9
 10 -16 -3 111.3 9.05
 10 -16 3 107.14 10.77
 10 -16 3 99.51 9.01
 10 16 3 92.76 10.29
 10 -16 -3 126.75 11.11
 10 -16 3 96.91 9.33
 10 -16 -3 110.25 9.36
 11 -16 3 -0.19 1.76
 11 -16 -3 -1.52 1.69
 11 -16 3 -0.99 2.03
 11 -16 -3 0.42 1.54
 11 16 3 -1.13 1.86
 11 -16 -3 -7.11 3.52
 11 -16 3 -1.97 1.8
 12 16 3 65.17 8.89
 12 -16 3 63.38 7.28
 12 -16 3 78.7 9.38
 12 -16 3 67.17 8.03
 12 -16 -3 77.39 7.51
 12 -16 -3 85.42 8.28
 13 -16 3 4.66 2.64
 13 -16 3 4.84 2.81
 13 -16 -3 10.31 3.03
 13 -16 -3 5.07 3.02
 13 16 3 3 2.87
 13 -16 3 13.29 4.92
 14 -16 3 75.17 8.59
 14 -16 3 78.22 8.09
 14 16 3 62.83 8.5
 14 -16 3 66.51 8.97
 14 -16 -3 79.81 7.94
 14 -16 -3 70.05 7.77
 15 -16 3 2.39 1.8
 15 -16 -3 -1.87 1.81
 15 -16 3 2.39 2.51
 15 -16 3 1.9 2.66
 15 16 3 -1.14 1.98
 15 -16 -3 -0.2 1.58
 16 -16 -3 74.05 8.13
 16 -16 3 77.31 8.68
 16 16 3 70.77 9
 16 -16 3 75.15 8.91
 16 -16 -3 79.24 8.41
 17 16 3 2.44 2.36
 17 -16 -3 -0.22 1.87
 17 -16 3 2.22 2.38
 17 -16 -3 -0.63 1.44
 17 -16 3 3.79 2.03
 18 -16 -3 39.85 6.14
 18 -16 3 39.42 6.54
 18 16 3 38.06 6.99
 18 -16 -3 38.96 6.02
 18 -16 3 39.14 6.8
 19 -16 3 2.43 2.54
 19 -16 -3 -1.91 2.03
 19 -16 -3 3.29 1.85
 19 -16 3 -1.39 1.87
 19 16 3 -0.7 2
 20 -16 3 52.67 7.81
 20 16 3 44.56 8.28
 20 -16 -3 38.38 6.11
 20 -16 3 55.17 7.49
 20 -16 -3 52.3 7.03
 21 -16 3 4.44 2.57
 21 -16 -3 -1.99 2.08
 21 16 3 -3.56 3.51
 21 -16 3 -2.69 2.52
 21 -16 -3 -3.34 2.69
 22 -16 3 43.63 7.29
 22 16 3 55.56 9.27
 22 -16 3 50.48 7.58
 22 -16 -3 55.79 7.1
 23 -16 3 -2.83 1.73
 23 -16 3 -1.24 2.35
 23 16 3 3.53 3.58
 23 -16 -3 -3.82 2.32
 24 -16 3 92.15 9.76
 24 16 3 106.19 13.21
 24 -16 -3 127.93 11.13
 25 16 3 1.24 1.96
 25 -16 3 -0.91 2.05
 25 -16 -3 0.7 1.62
 26 -16 -3 103.66 10.19
 26 -16 3 122.22 11.38
 27 -16 3 38.52 7.91
 27 -16 -3 -1.56 2.15
 28 -16 3 84.86 9.54
 28 -16 -3 78.47 8.15
 29 -16 -3 -1.13 1.37
 29 -16 3 3.14 1.9
 30 -16 3 23.27 5.36
 31 -16 3 4.67 2.6
 32 -16 3 77.86 9.3
 33 -16 3 -1.17 1.47
 34 -16 3 69.5 8.11
 35 -16 3 5.79 2.01
 36 -16 3 34.5 6.02
 37 -16 3 0.95 1.67
 38 -16 3 51.57 6.85
 39 -16 3 1.09 1.62
 40 -16 3 40.45 5.43
 41 -16 3 -2.05 1.25
 0 -17 3 0.64 1.71
 0 -17 -3 -1.89 2.79
 0 17 3 2.43 3.19
 0 -17 3 -1.99 2.34
 -1 -17 3 157.87 9.7
 1 -17 3 171.38 10.74
 1 -17 -3 152.89 10.74
 -1 17 3 158.9 14.37
 1 17 3 159.03 14.01
 -1 -17 -3 157.82 10.96
 1 -17 3 146.46 9.54
 -1 -17 3 164.6 10.58
 2 -17 3 0.75 1.77
 -2 -17 3 0.95 1.57
 -2 17 3 7.07 4.48
 2 17 3 -4.13 3.1
 -2 -17 -3 6.58 3.3
 2 -17 3 1.81 1.86
 2 -17 -3 3.07 2.26
 2 -17 -3 7.26 2.88
 -2 -17 3 3.63 2.02
 3 -17 3 11.63 3.26
 3 -17 3 16.14 3.94
 3 -17 -3 11.46 2.82
 -3 17 3 14.08 4.58
 3 17 3 9.85 4.16
 -3 -17 3 11.97 3.46
 3 -17 -3 16.89 4.65
 -3 -17 -3 13.32 5.95
 3 -17 3 12.43 3.5
 -3 -17 3 15.57 3.18
 3 -17 -3 16.05 3.92
 4 -17 3 0.42 1.79
 4 17 3 1.19 2.25
 -4 -17 3 6.07 2.94
 4 -17 3 3.39 2.25
 4 -17 -3 2.51 2.39
 -4 17 3 2.73 1.93
 4 -17 -3 3.08 2.01
 4 -17 3 3.32 2.6
 4 -17 -3 2.4 1.63
 5 17 3 324.91 18.69
 5 -17 3 302.45 13.82
 5 -17 -3 348.87 16.85
 -5 -17 -3 334.61 15.94
 5 -17 3 355.35 16.39
 -5 -17 3 288.19 14.3
 5 -17 3 313.71 14.89
 5 -17 -3 357.03 15.77
 5 -17 -3 315.8 14.52
 -6 -17 3 -0.51 1.59
 6 -17 3 0.68 1.55
 6 17 3 -0.77 2.52
 6 -17 3 1.47 2.22
 6 -17 -3 -0.47 2.08
 6 -17 -3 3.16 2.07
 6 -17 3 -0.25 2.01
 6 -17 -3 -2.19 3.22
 -6 -17 -3 -5.38 2.57
 7 -17 -3 800.46 25.66
 7 17 3 812.56 28.66
 7 -17 3 784.77 24.57
 7 -17 -3 805.59 23.29
 7 -17 3 758.03 23.25
 7 -17 -3 805.49 23.88
 7 -17 3 745.89 21.49
 8 -17 3 2.09 2.4
 8 -17 3 1.53 1.84
 8 -17 -3 2.51 2.37
 8 17 3 -3.69 2.7
 8 -17 -3 -1.47 1.62
 8 -17 -3 0.08 2.62
 8 -17 3 -1.67 1.94
 9 -17 -3 770.32 23.07
 9 -17 -3 721.46 22.67
 9 17 3 807.49 28.23
 9 -17 -3 768.57 25.37
 9 -17 3 761.12 25.14
 9 -17 3 734.31 23.35
 9 -17 3 697.72 21.2
 10 -17 -3 4.7 1.67
 10 -17 3 2.28 2.21
 10 17 3 3.62 1.8
 10 -17 -3 5.98 2.26
 10 -17 -3 4.79 2.65
 10 -17 3 5.76 2.55
 10 -17 3 3.46 2.74
 11 -17 3 421.06 16.59
 11 -17 -3 443.4 19.97
 11 -17 -3 426.76 17.54
 11 17 3 483.19 21.53
 11 -17 3 417.54 17.74
 11 -17 3 458.11 19.71
 11 -17 -3 462.9 18.1
 12 -17 3 3.06 2.64
 12 -17 -3 1.21 1.21
 12 -17 -3 -2.48 2.76
 12 17 3 0.73 1.76
 12 -17 3 -0.74 1.43
 12 -17 3 4.13 2.71
 13 -17 3 129.94 9.52
 13 -17 3 131.75 10.13
 13 17 3 137.99 11.89
 13 -17 3 124.87 10.93
 13 -17 -3 137.18 10.06
 13 -17 -3 129.17 9.84
 14 -17 -3 16.07 3.85
 14 -17 3 19.04 4.79
 14 -17 3 13.15 3.72
 14 17 3 15.23 4.25
 14 -17 -3 18.28 3.95
 14 -17 3 15.22 3.75
 15 -17 -3 3.85 2.34
 15 17 3 4.37 2.87
 15 -17 3 3.48 3.51
 15 -17 3 8.7 2.85
 15 -17 3 5.02 2.97
 15 -17 -3 -0.91 1.35
 16 17 3 -0.62 2.01
 16 -17 3 -0.14 1.48
 16 -17 -3 0.6 2.11
 16 -17 -3 -4.42 2.66
 16 -17 3 1.17 1.81
 17 -17 3 44.45 5.96
 17 -17 -3 35.34 5.36
 17 17 3 40.74 6.71
[truncated: 618,663 more chars]
